# Supplementary material
Source: PubMed Central journal article supplement (PMC2812478)
Supplement: NIHMS165064-supplement-01.pdf [file NIHMS165064-supplement-01.pdf]

Supplemental Data  
OSS unique reads

tj chr 2L : 19464444 - 19467886 +

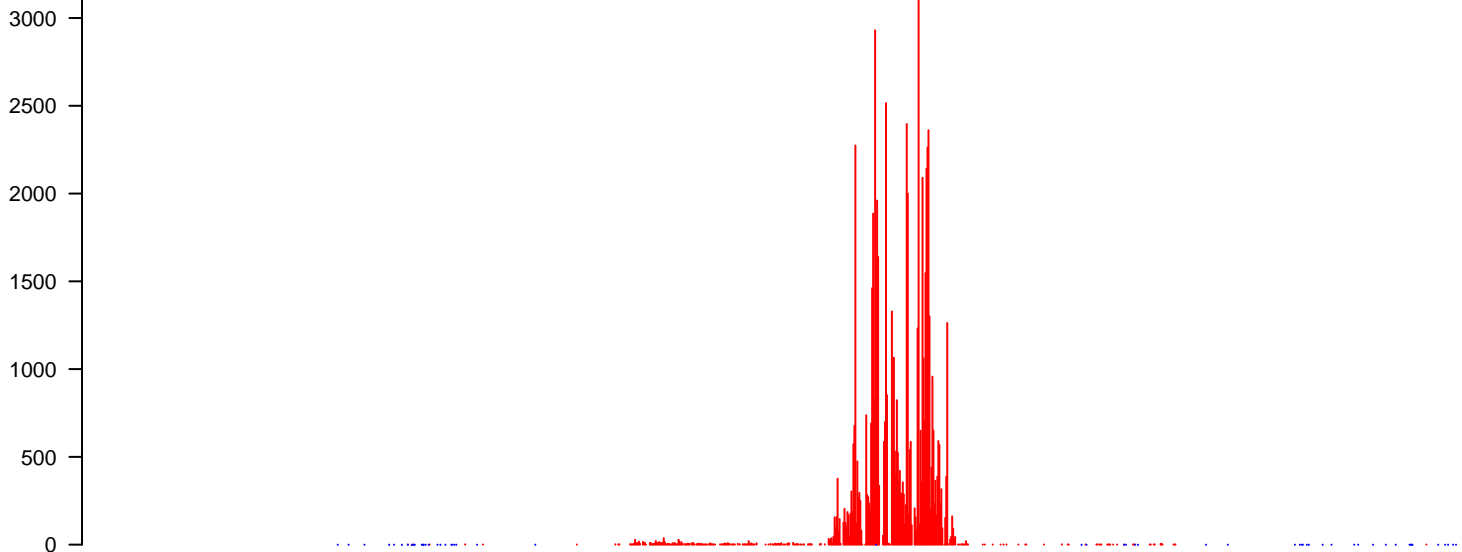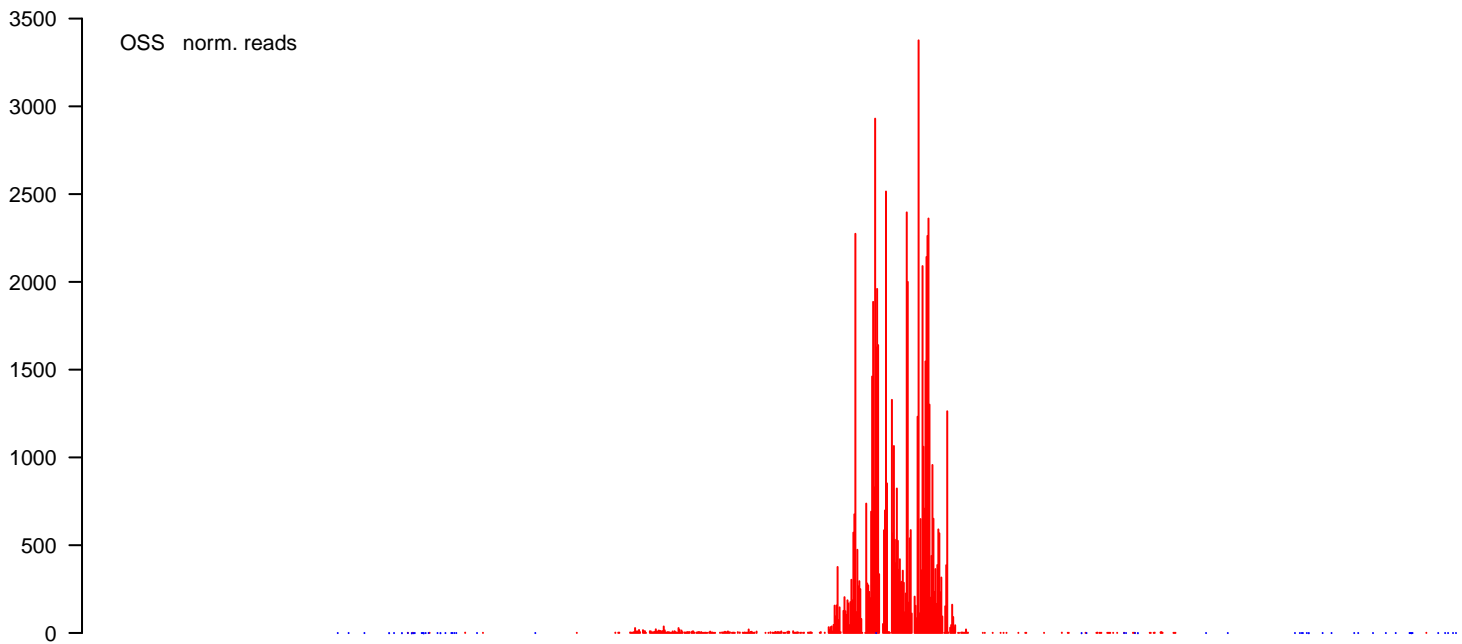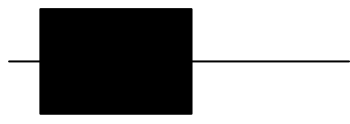

tj 2L + 19464444 19467886

OSS unique reads

brat chr 2L : 19133806 – 19174756 +

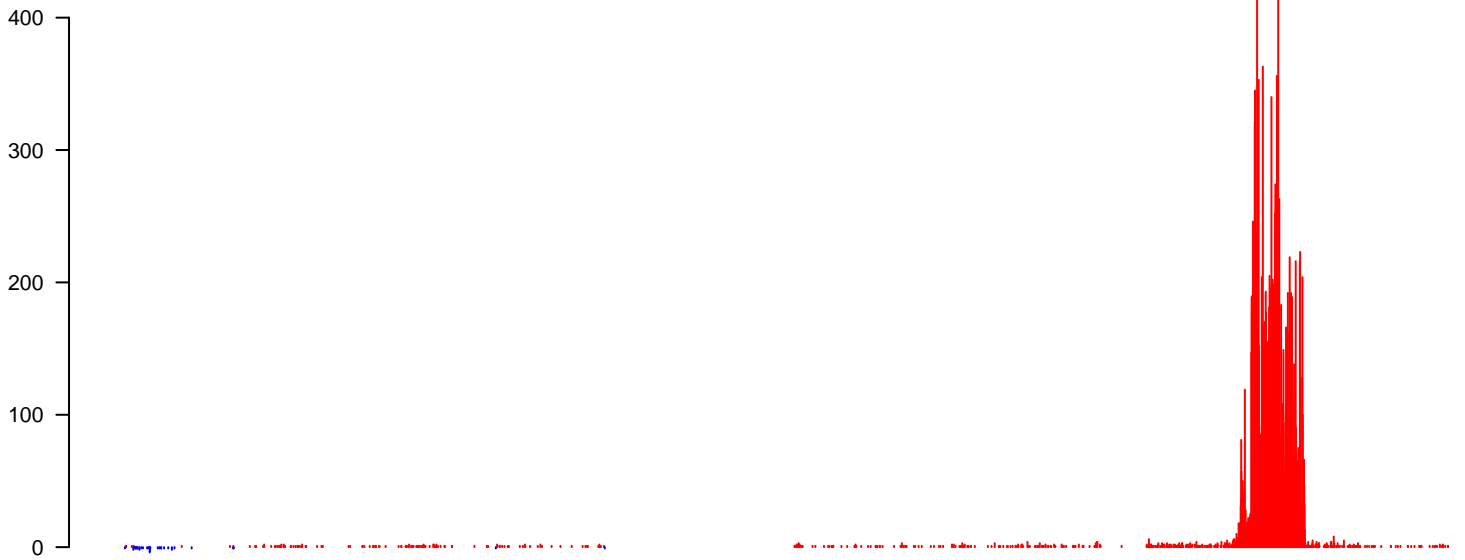

OSS norm. reads

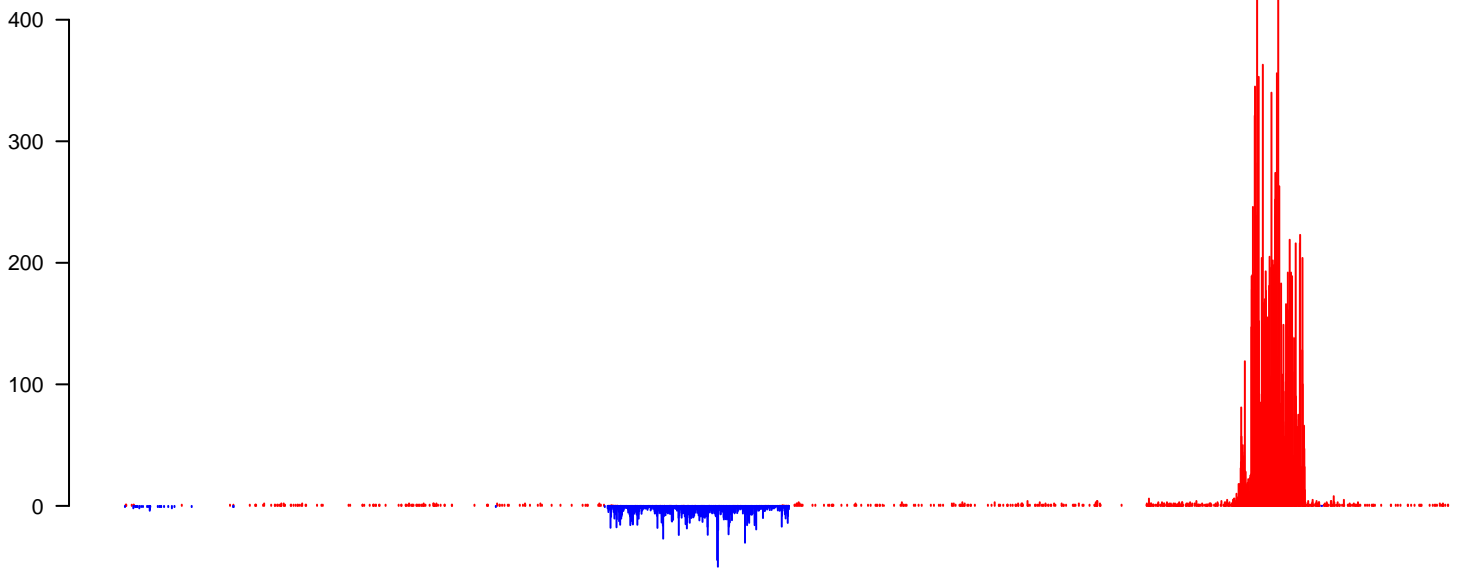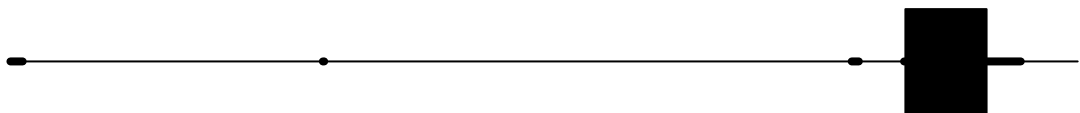

brat 2L + 19133806 19174756

OSS unique reads

larp chr 3R : 24143896 – 24154005 –

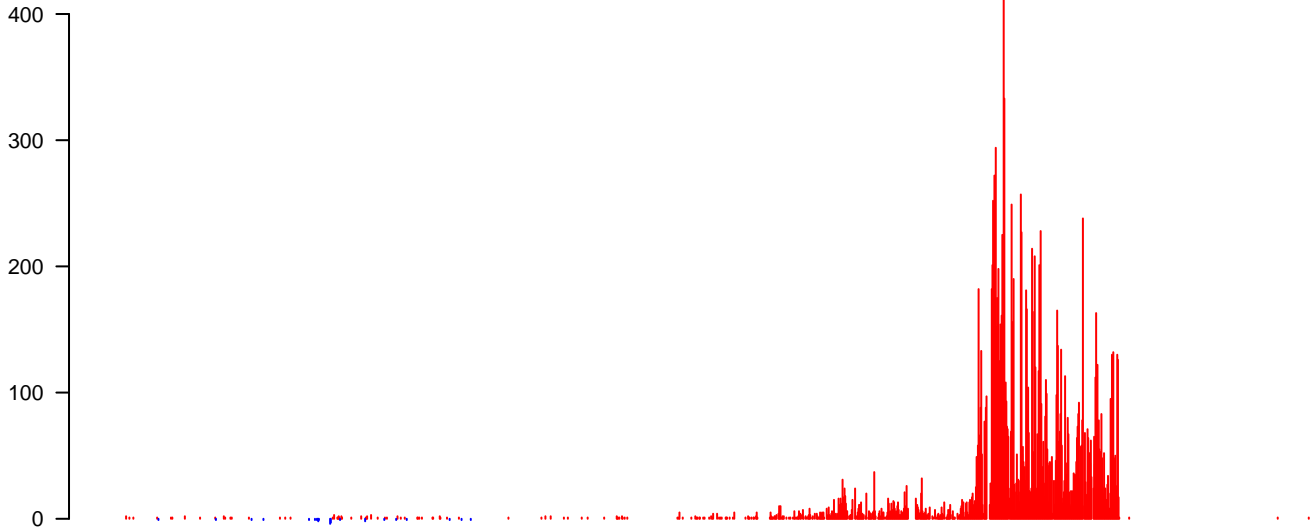

OSS norm. reads

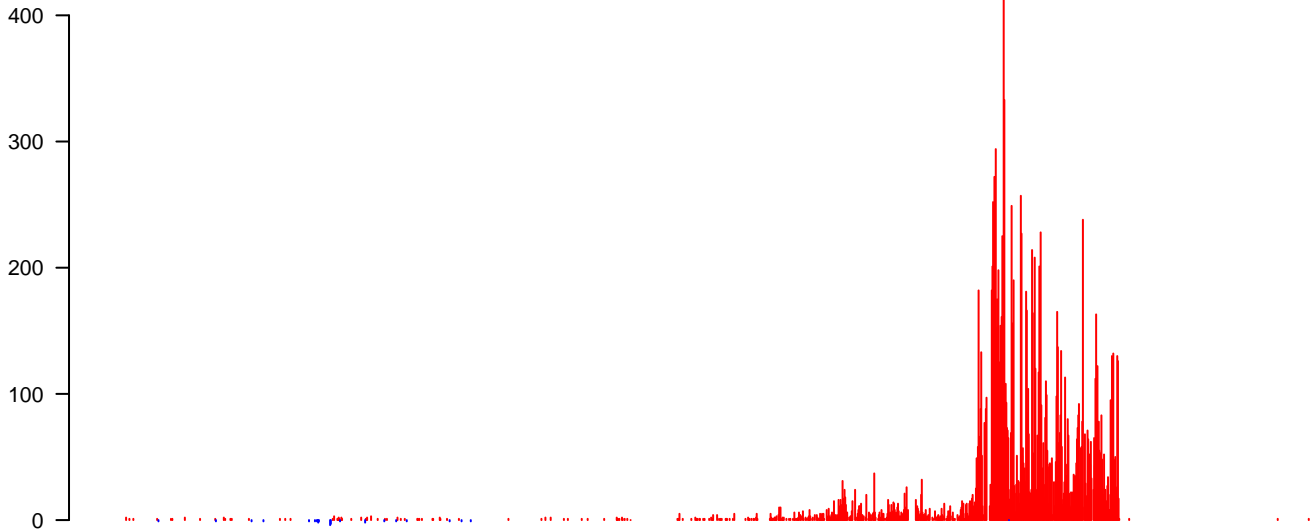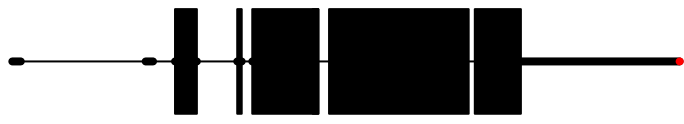

larp 3R – 24143896 24154005

OSS unique reads

dm chr X : 3267216 – 3283137 +

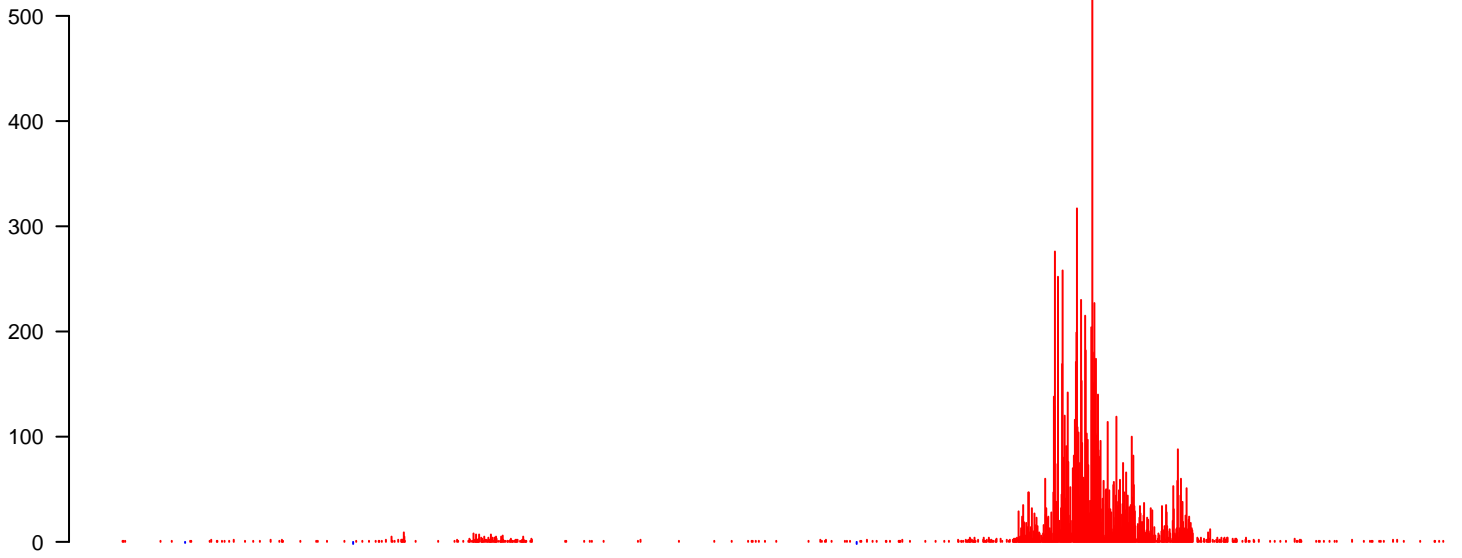

OSS norm. reads

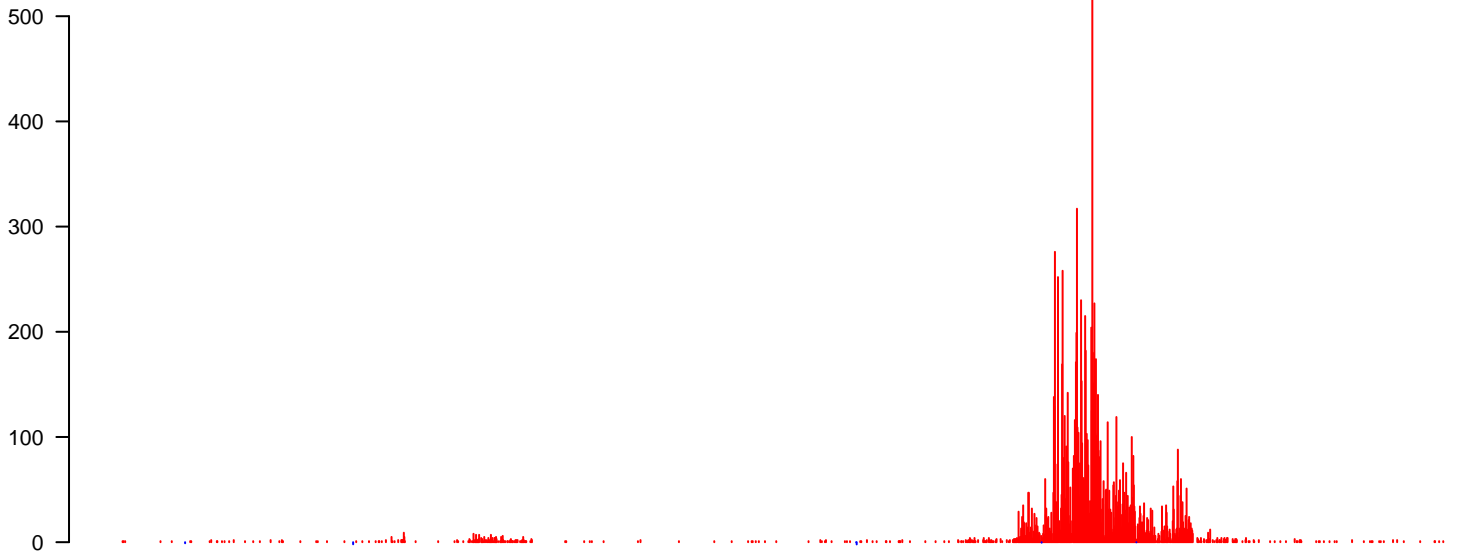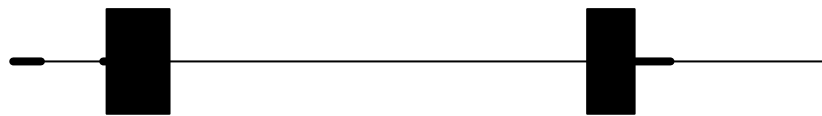

dm X + 3267216 3283137

OSS unique reads

CG6424 chr 2R : 13590749 – 13606832 –

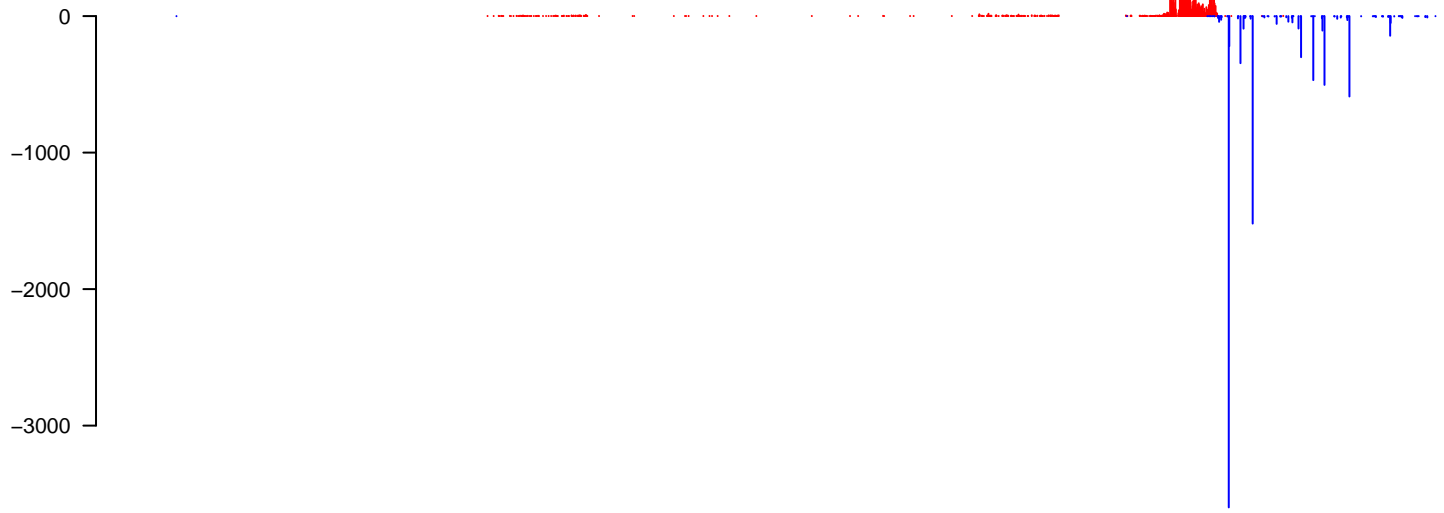

OSS norm. reads

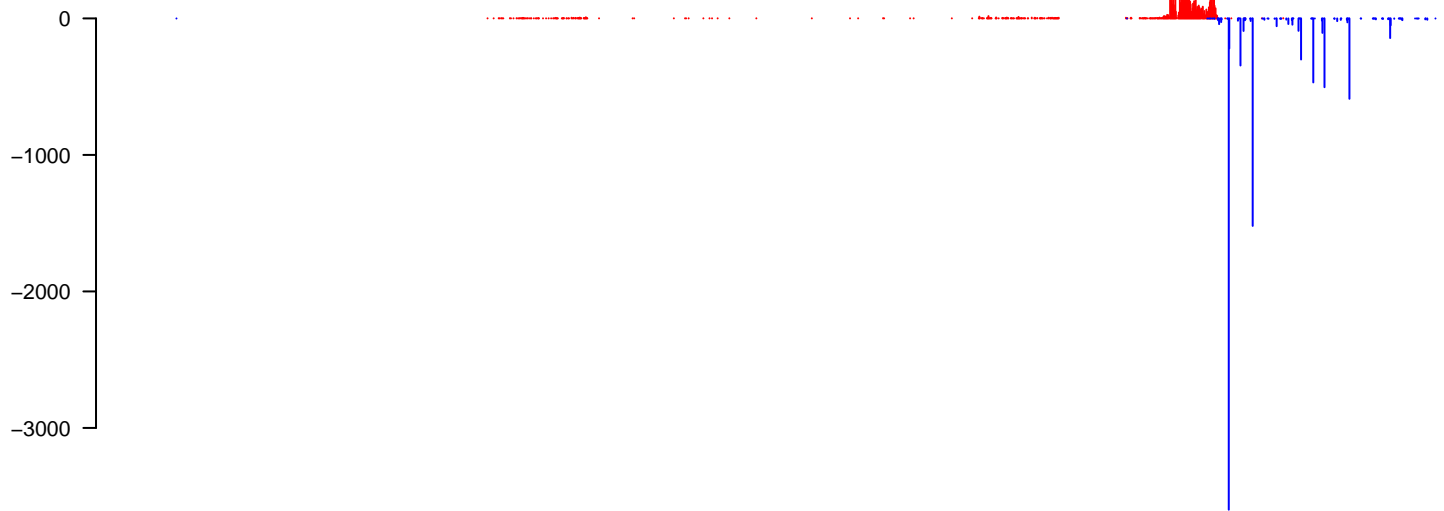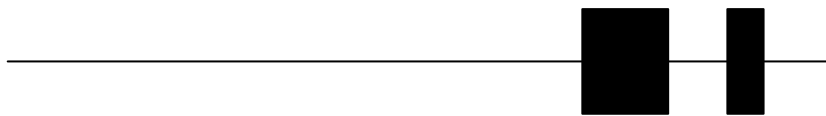

CG6424 2R – 13590749 13606832

OSS unique reads

I(2)gl chr 2L : 9836 – 21372 –

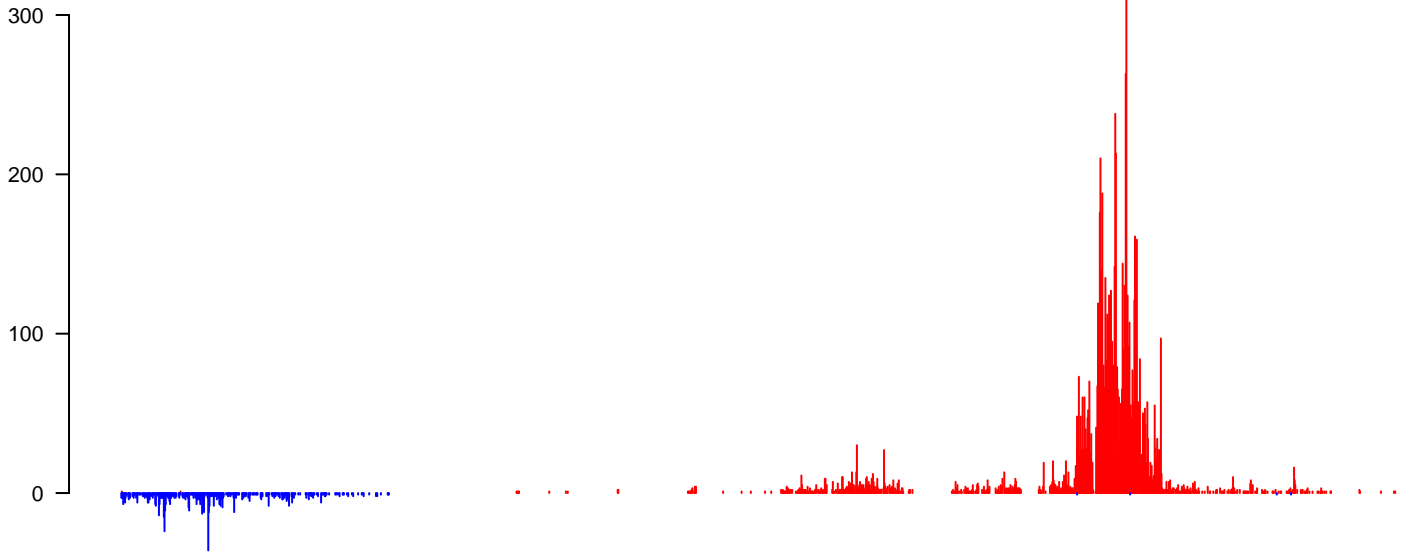

OSS norm. reads

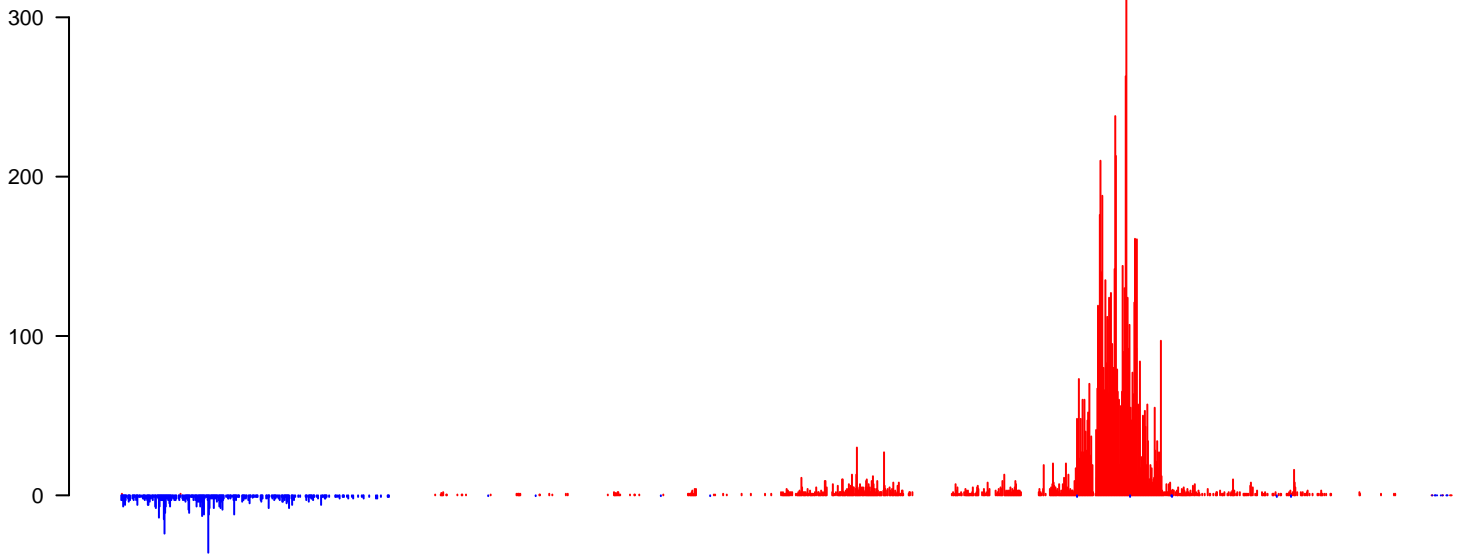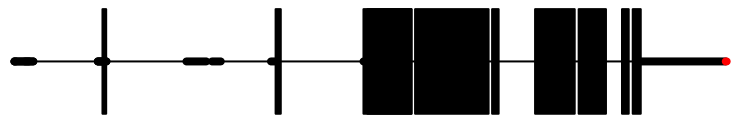

I(2)gl 2L – 9836 21372

OSS unique reads

CG10289 chr 3L : 6159402 – 6166966 –

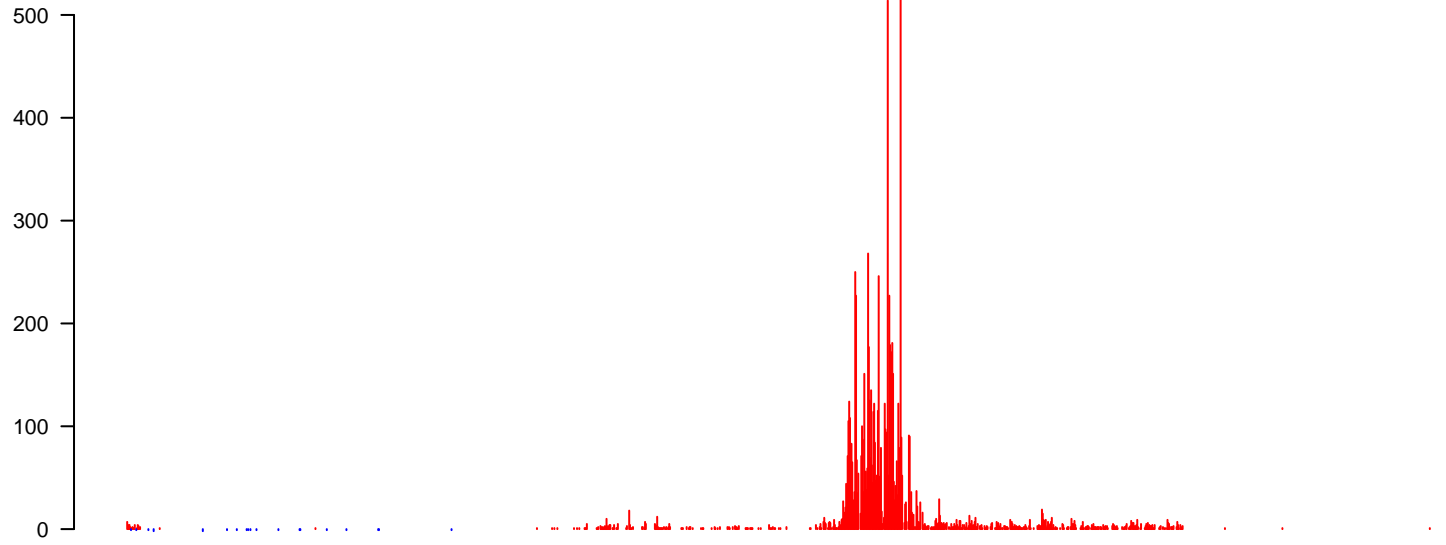

OSS norm. reads

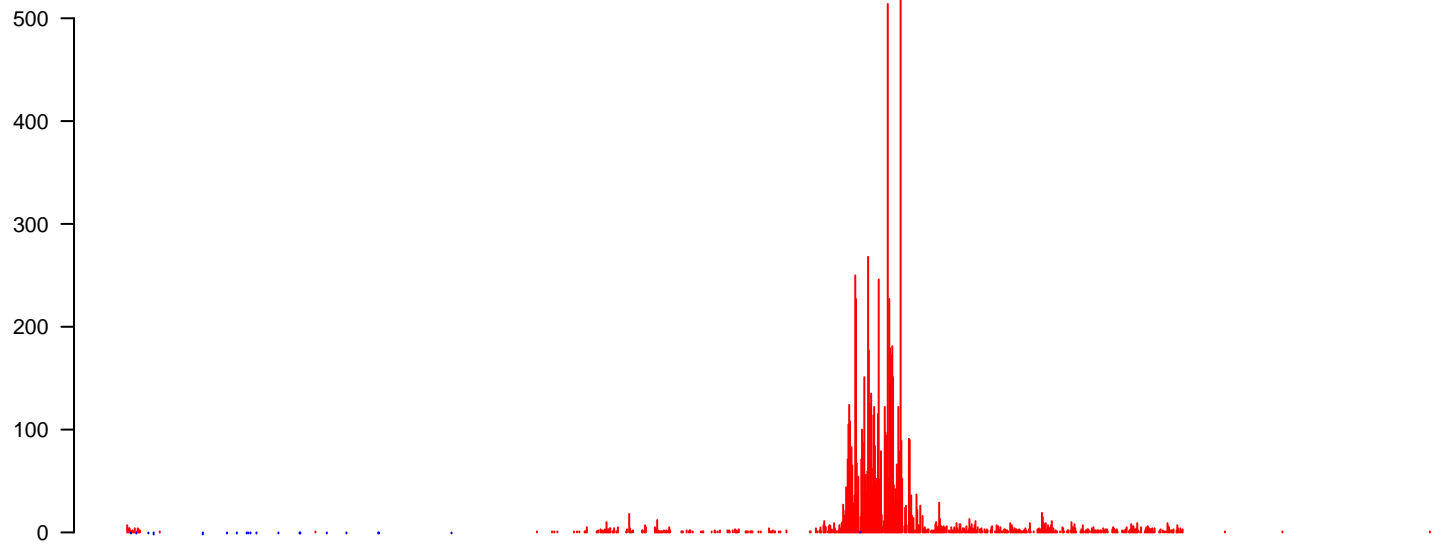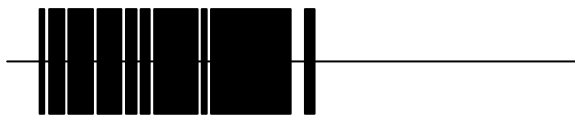

CG10289 3L – 6159402 6166966

OSS unique reads

jog chr X : 19724188 – 19746084 –

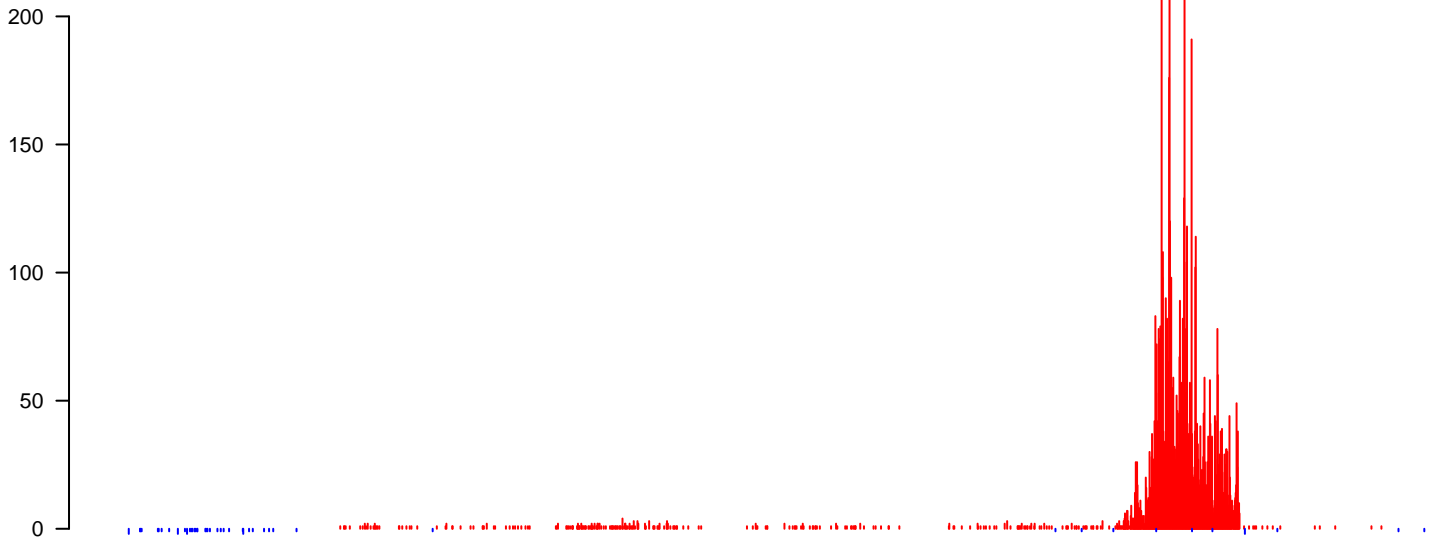

OSS norm. reads

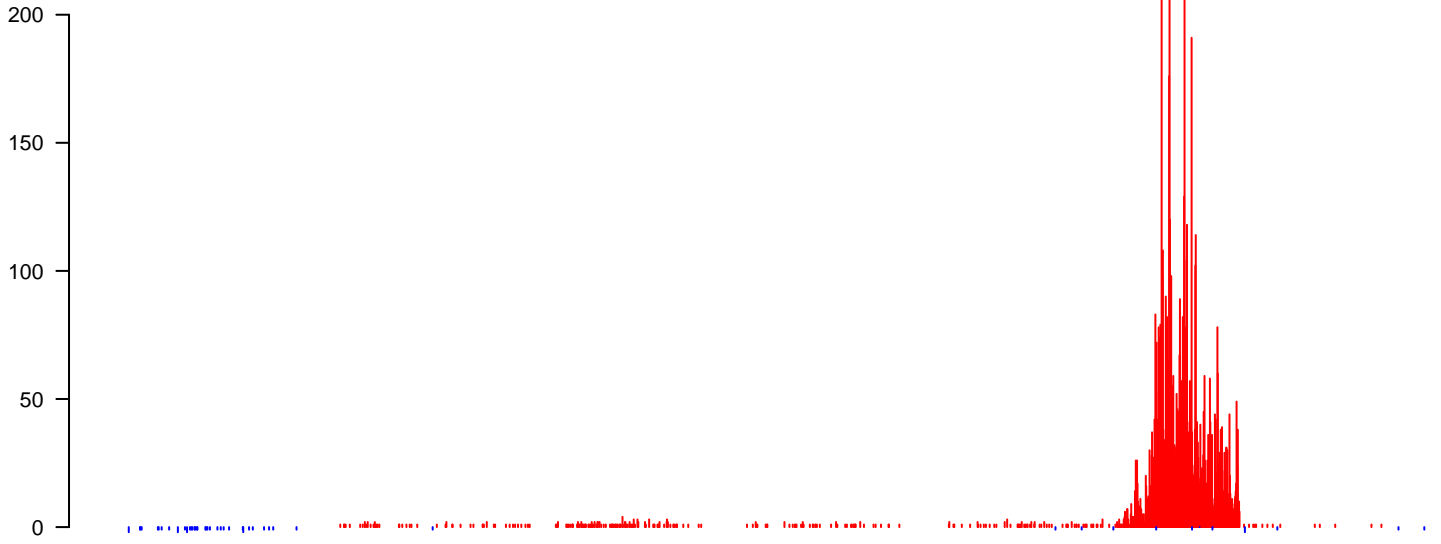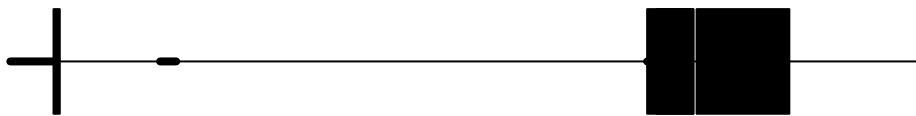

jog X – 19724188 19746084



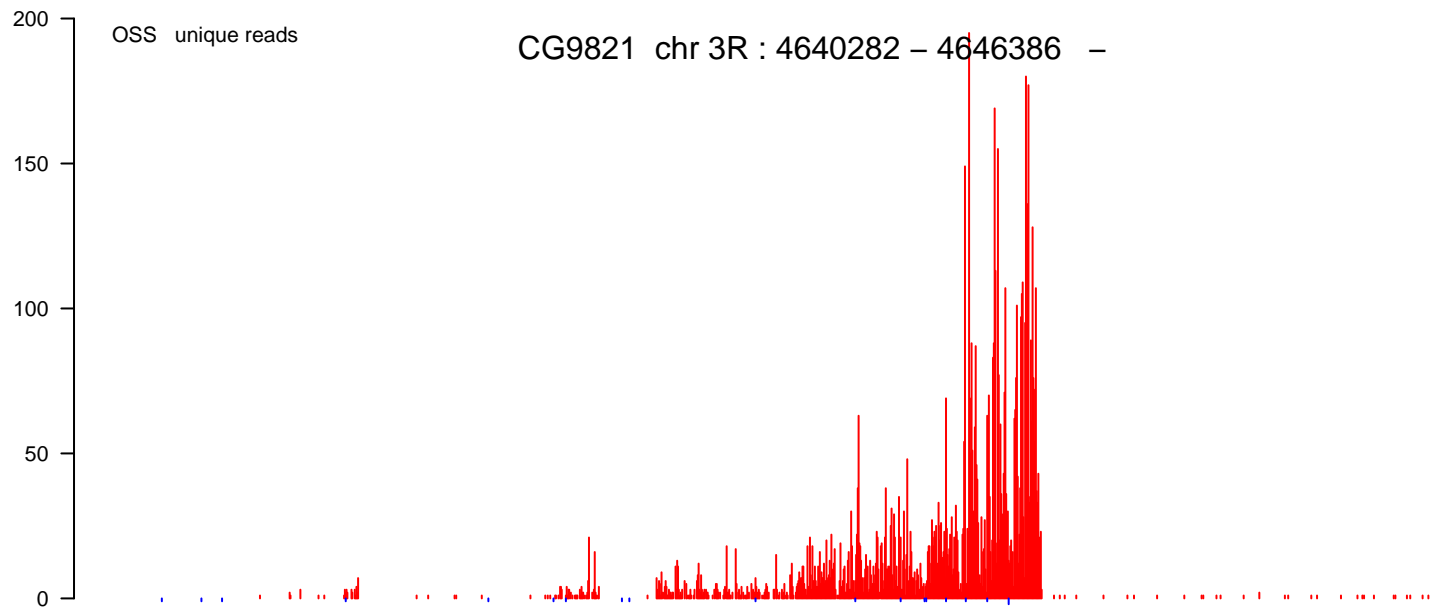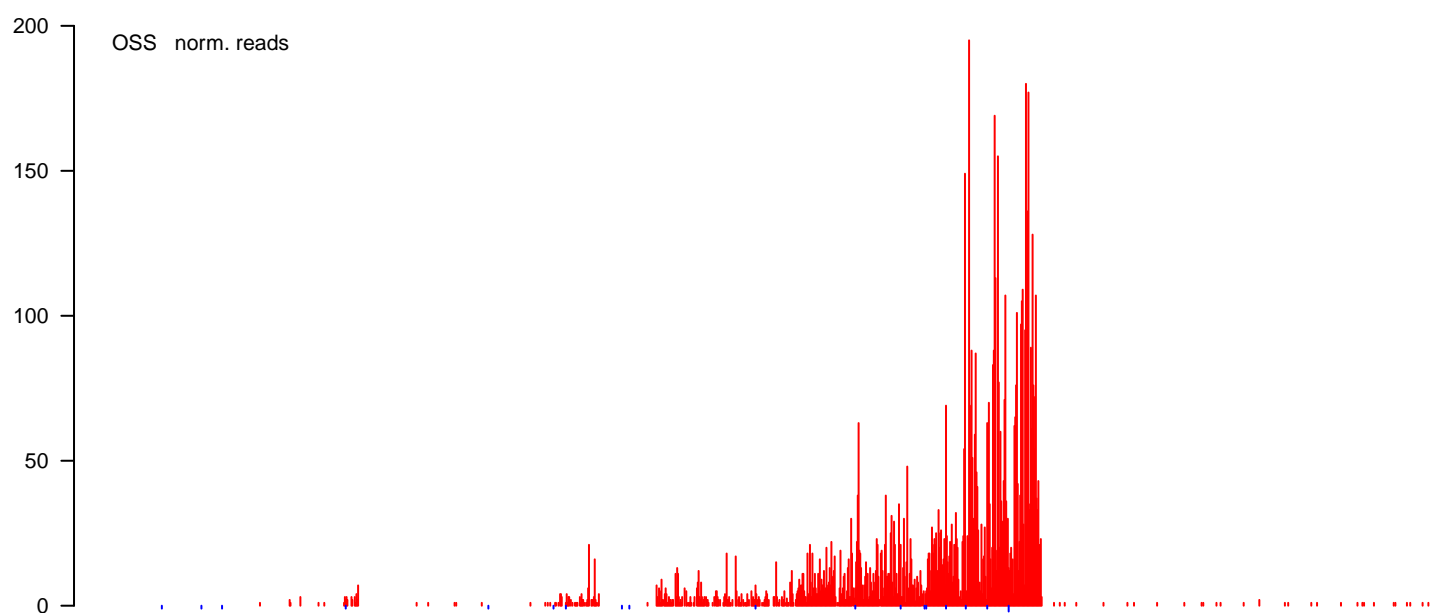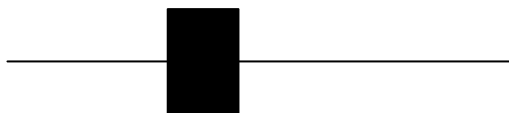

CG9821 3R – 4640282 4646386

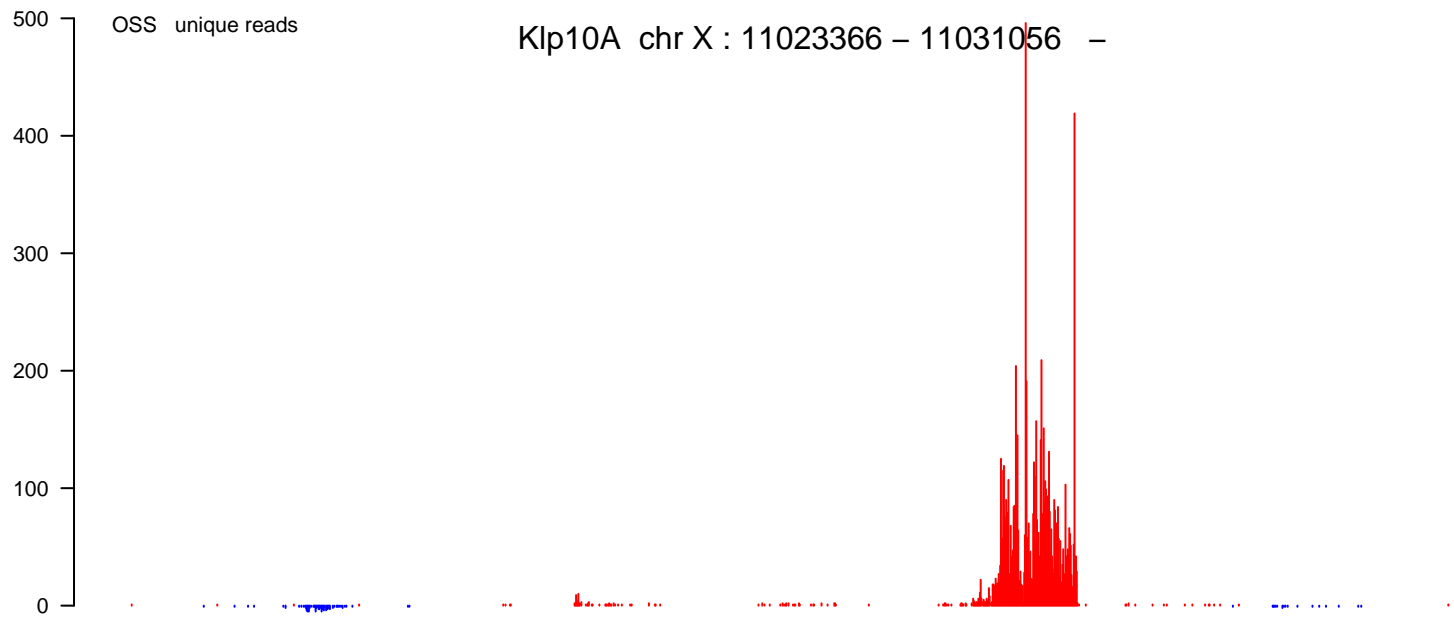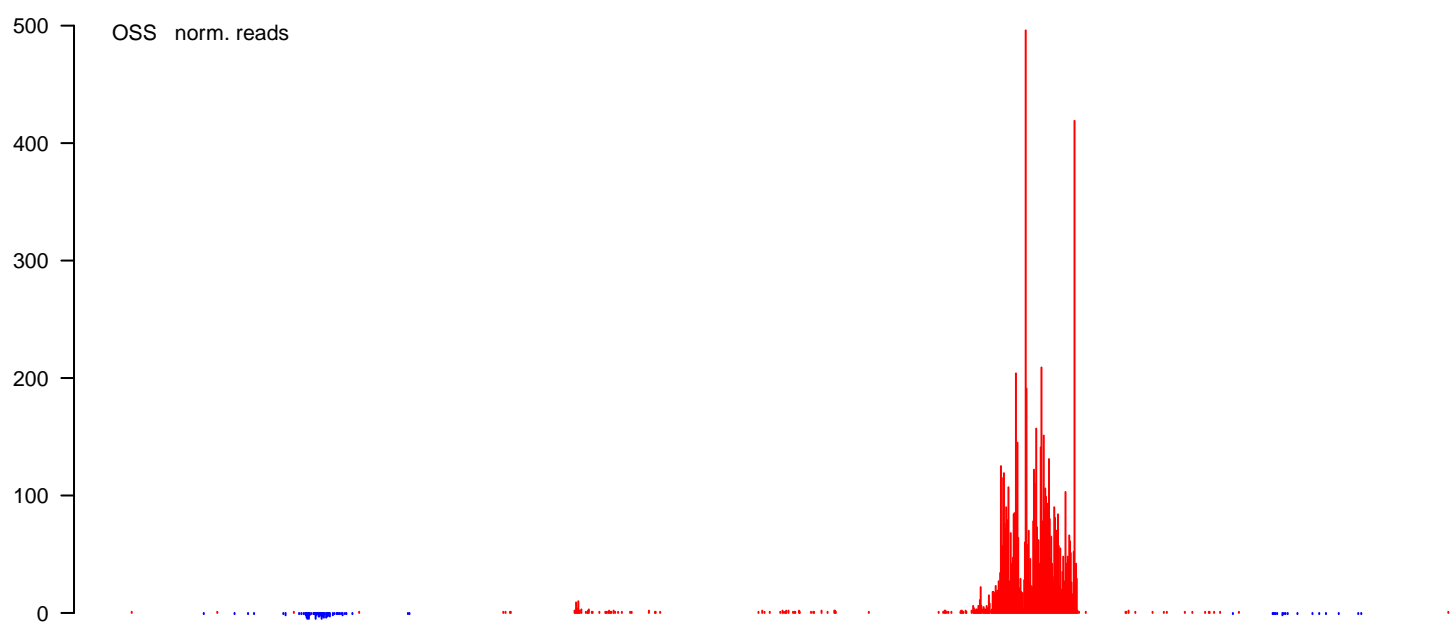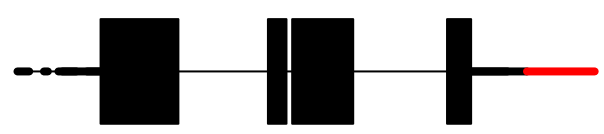

Klp10A X – 11023366 11031056

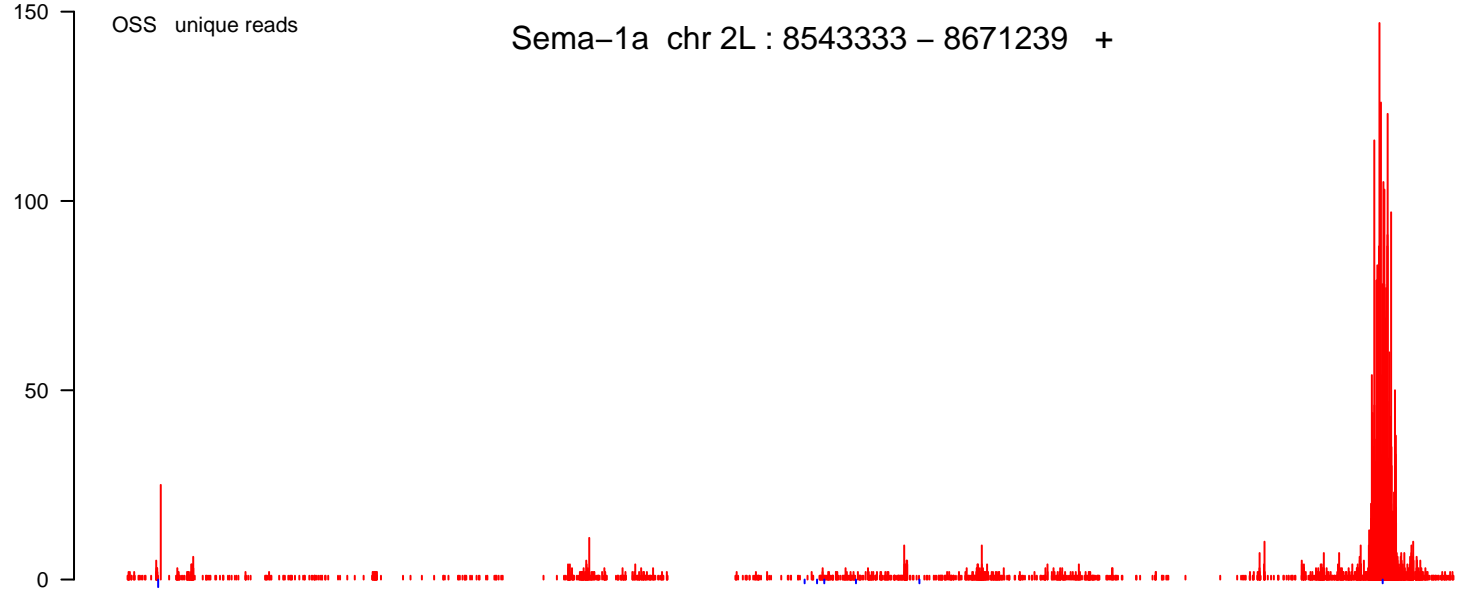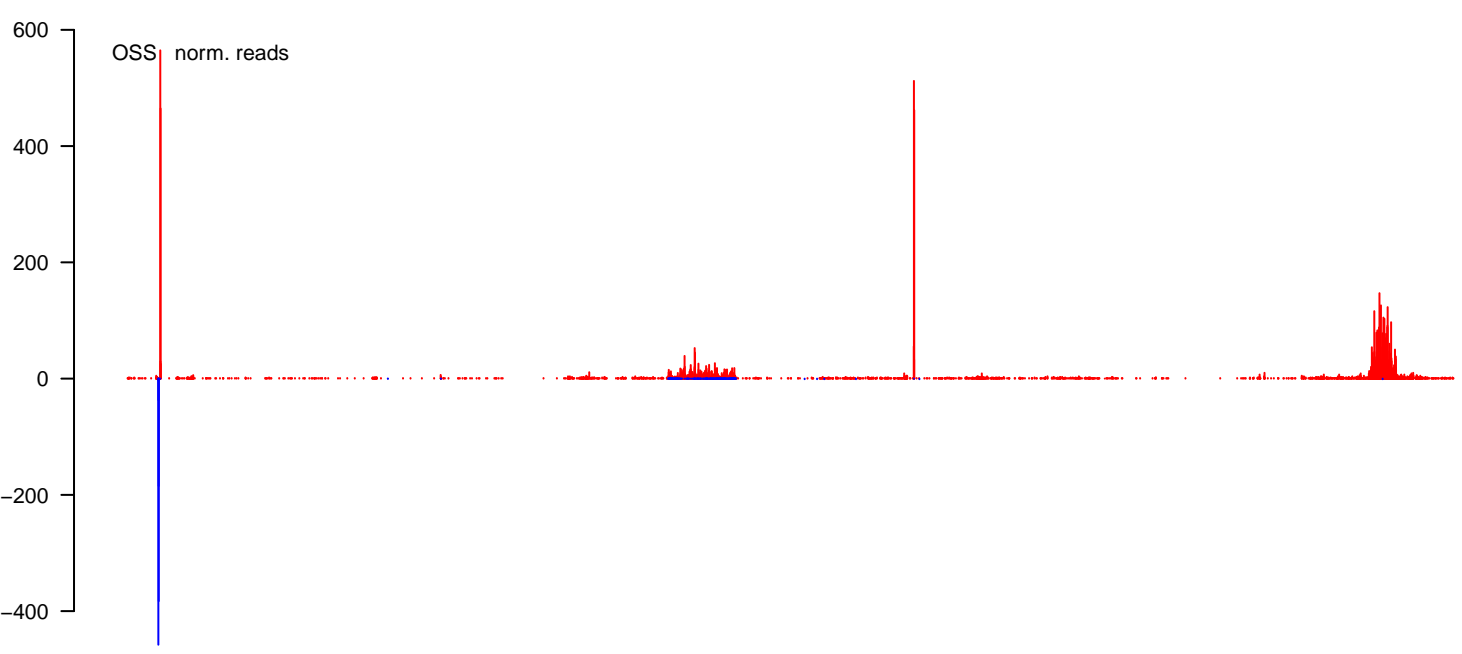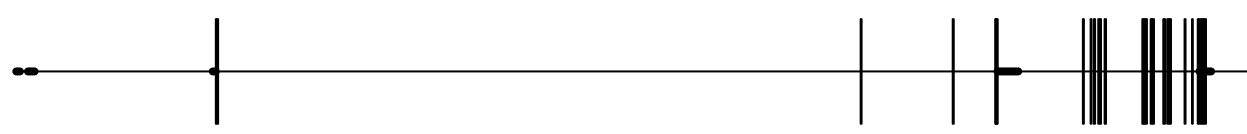

OSS unique reads

chr3L : 11480660 - 11492180 +

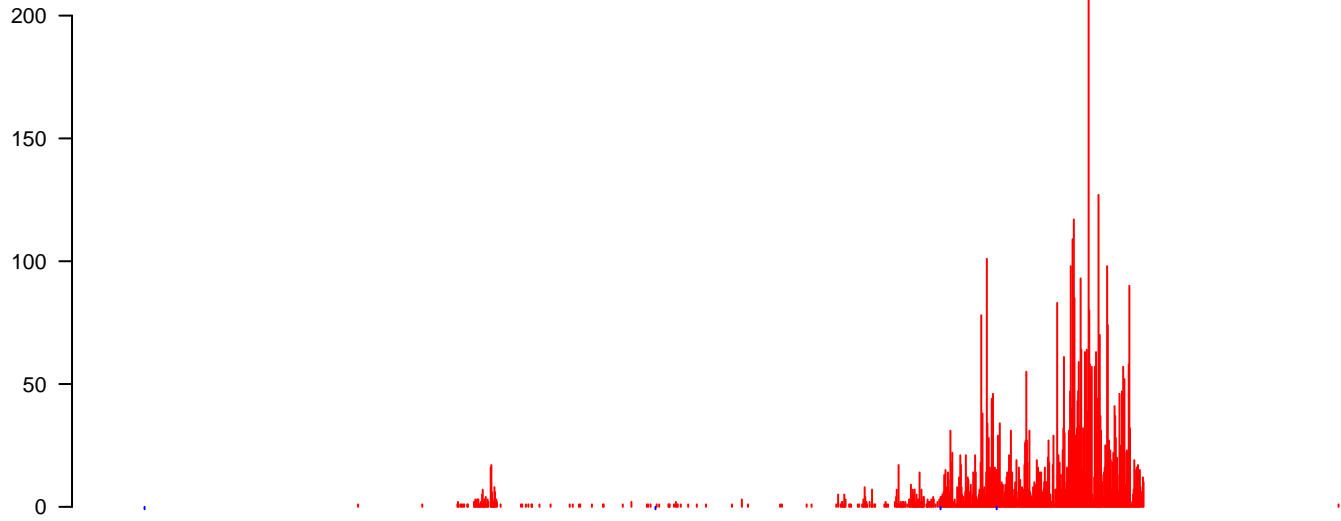

OSS norm. reads

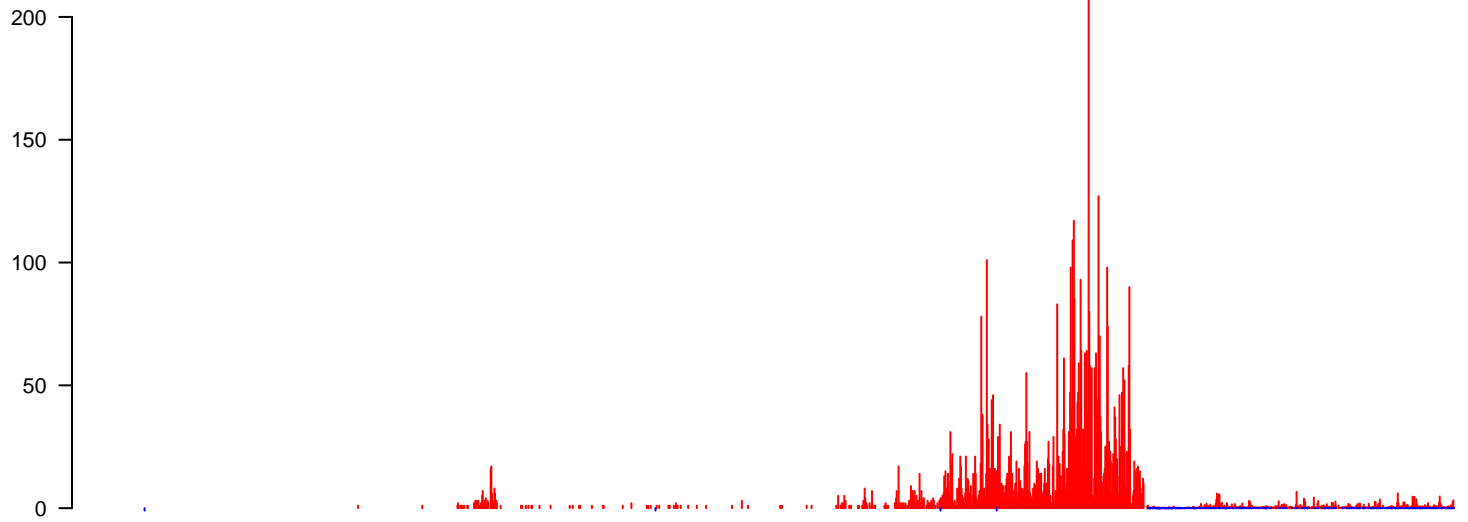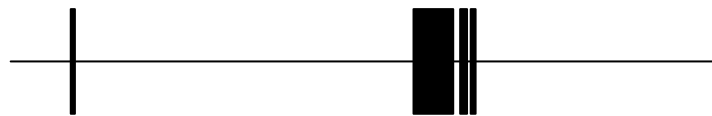

chr3L + 11480660 11492180

OSS unique reads

CycG chr 3R : 27422362 – 27438386 –

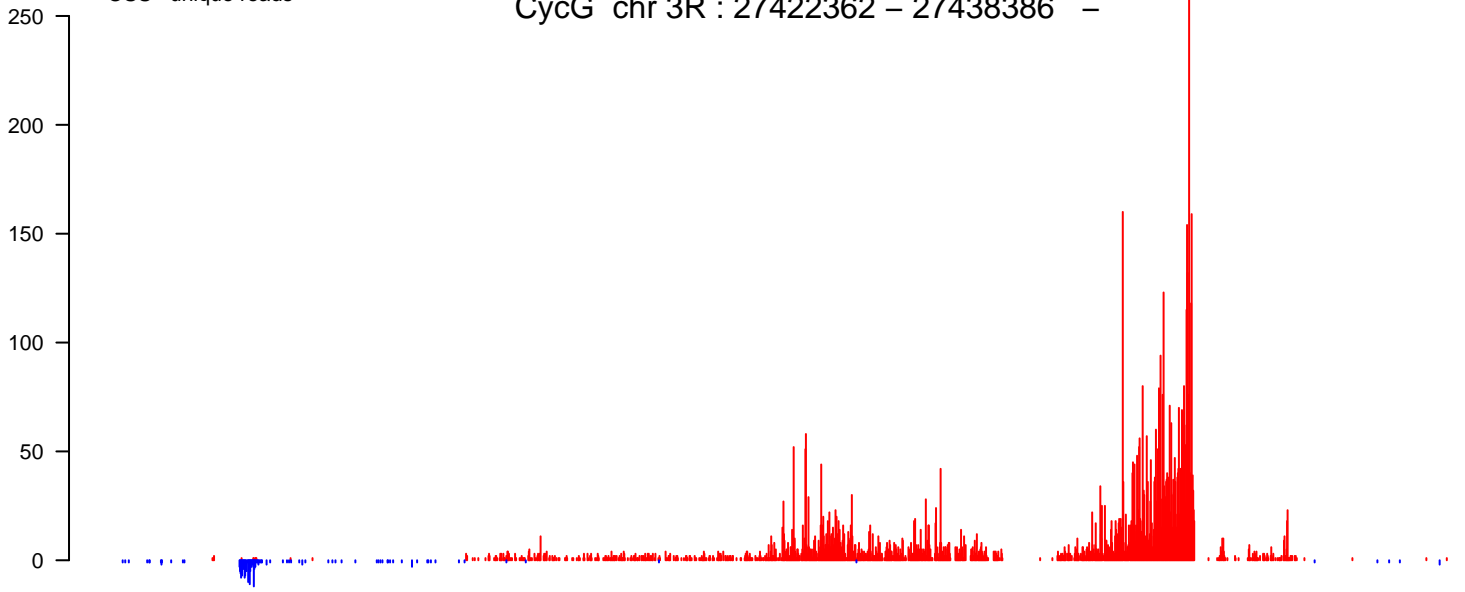

OSS norm. reads

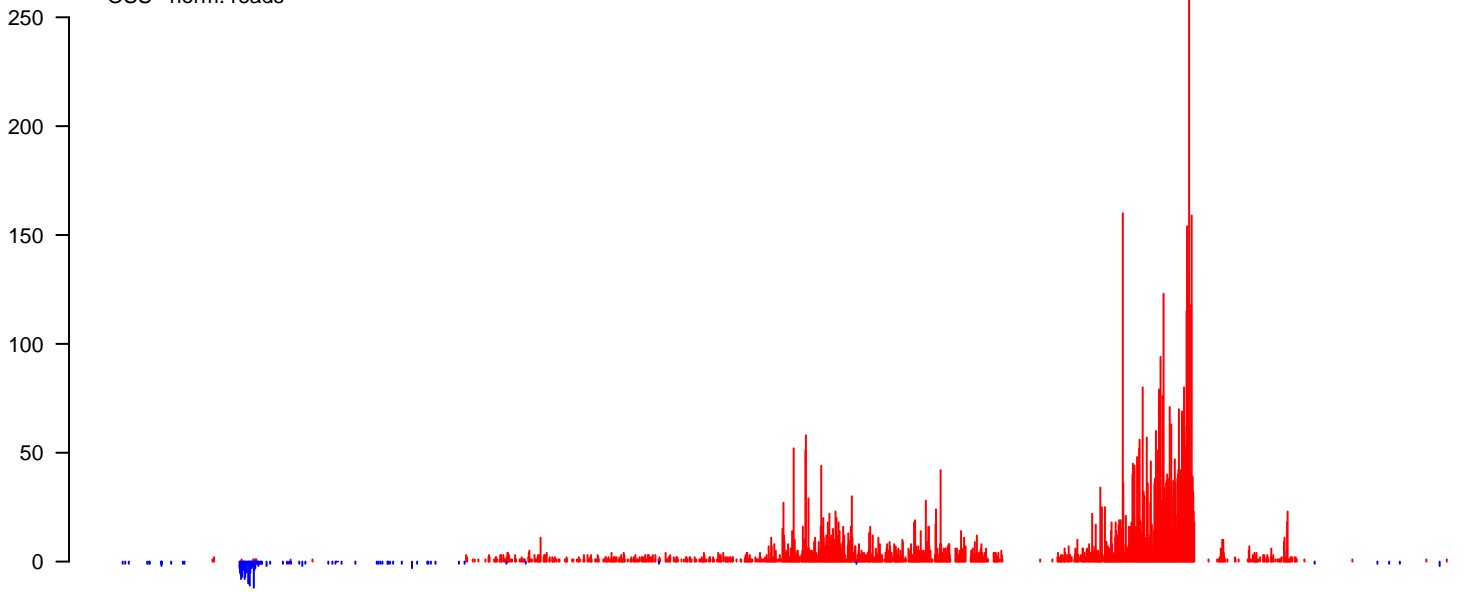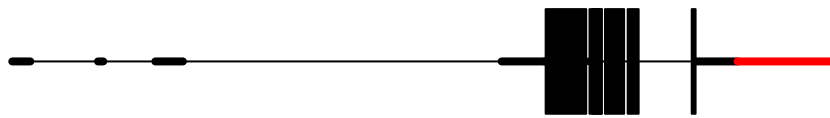

CycG 3R – 27422362 27438386

OSS unique reads

kel chr 2L : 18128495 – 18138210 –

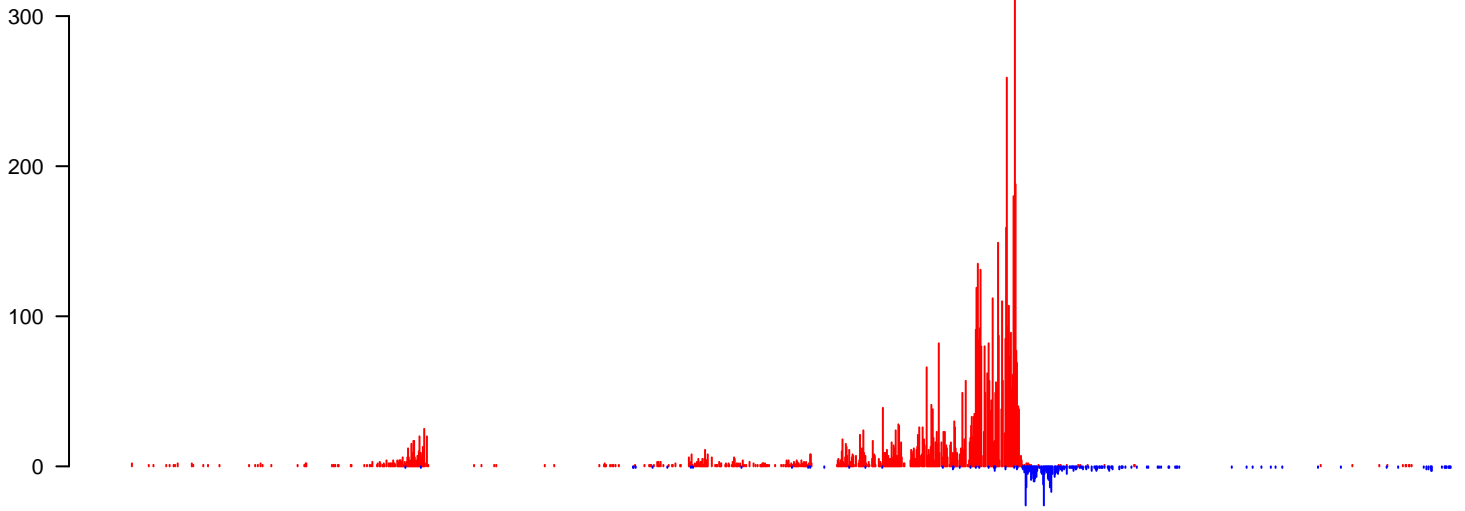

OSS norm. reads

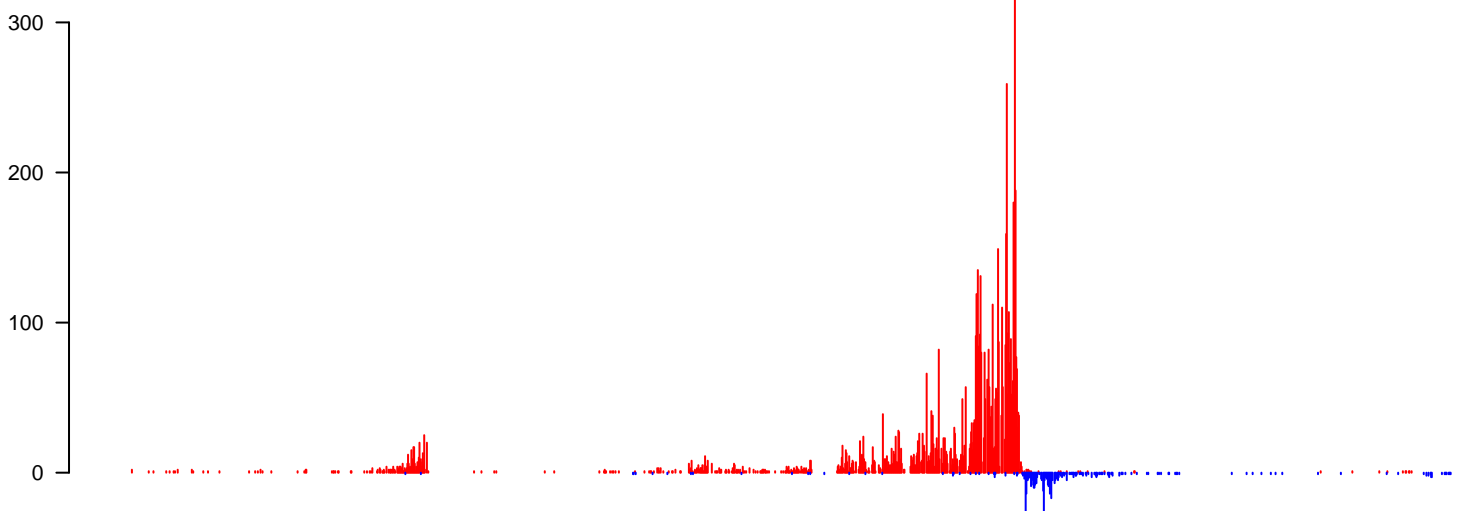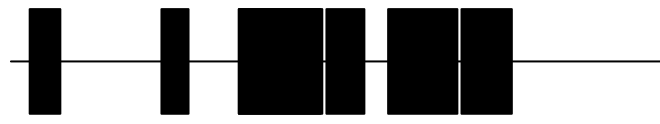

kel 2L – 18128495 18138210

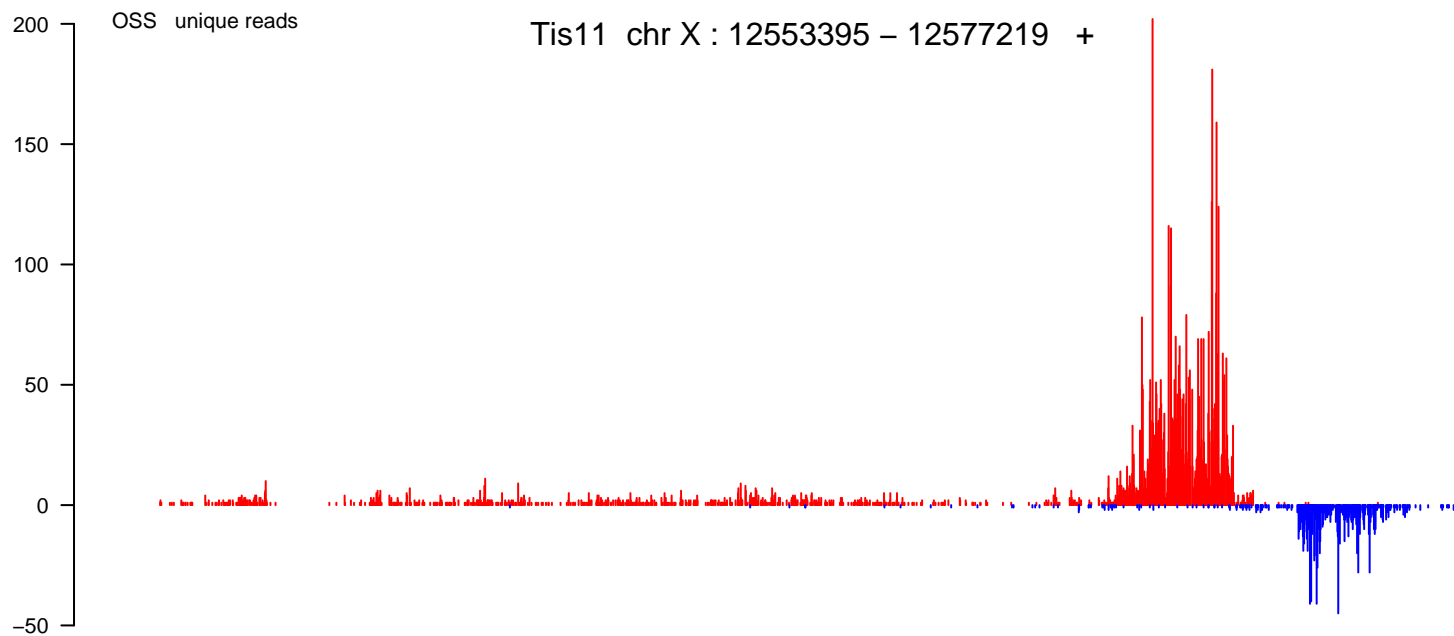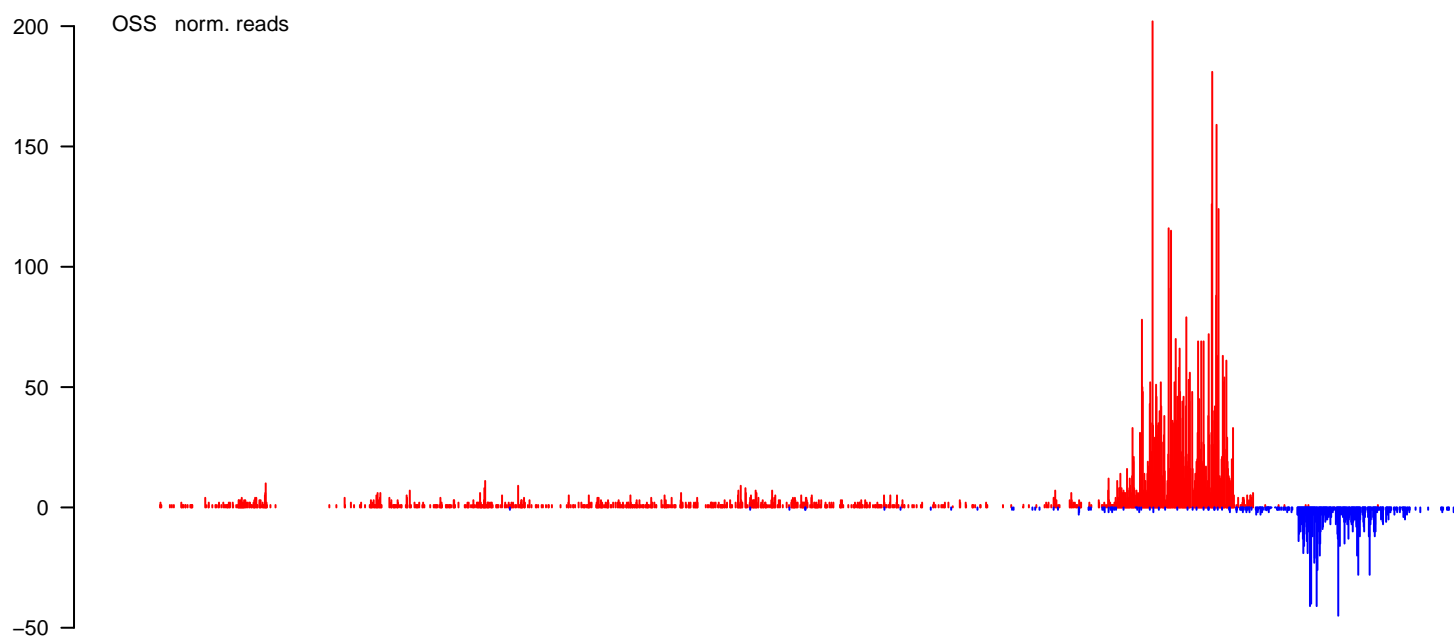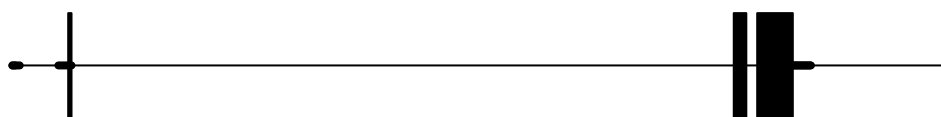

Tis11 X + 12553395 12577219

OSS unique reads

Patr-1 chr 3R : 12869290 - 12874152 +

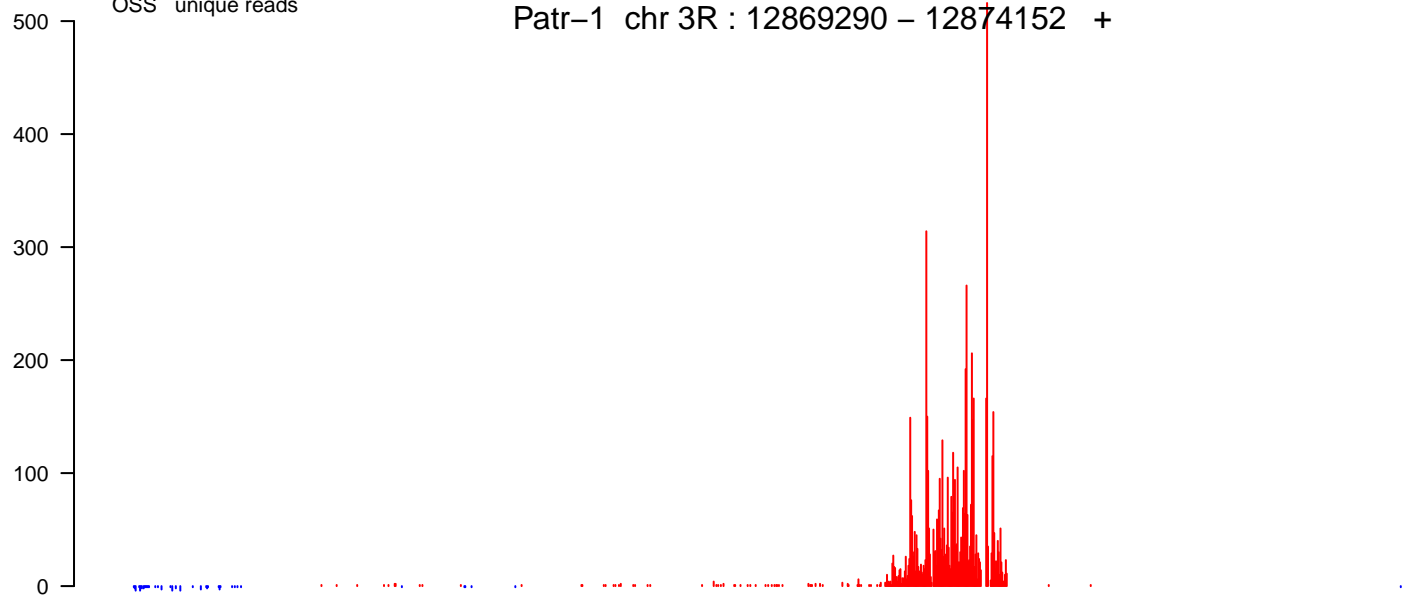

OSS norm. reads

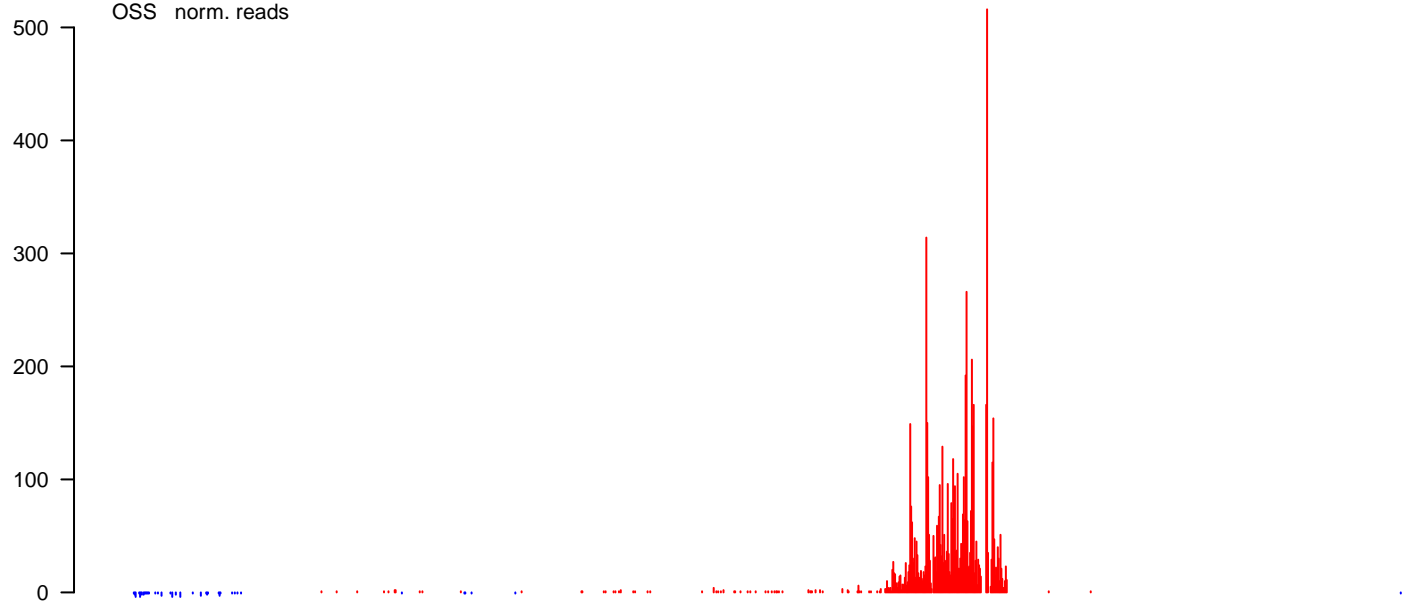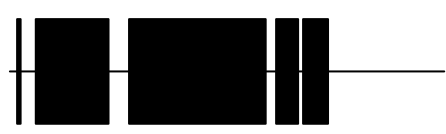

Patr-1 3R + 12869290 12874152



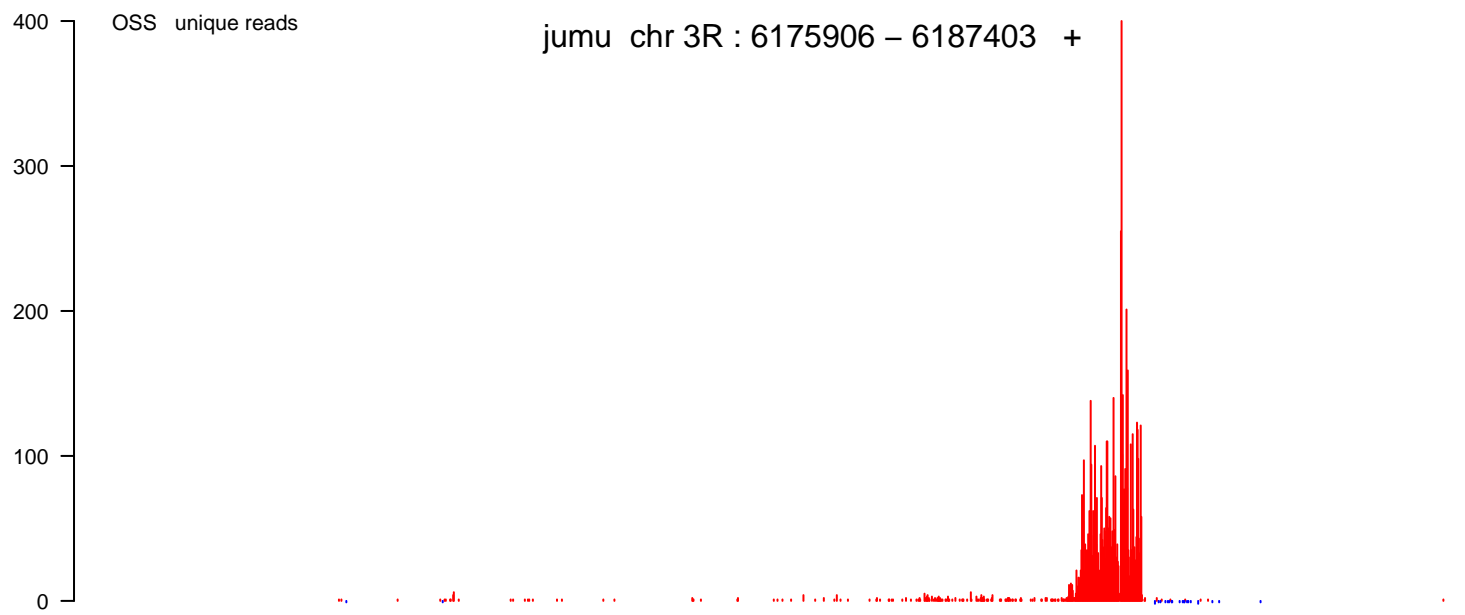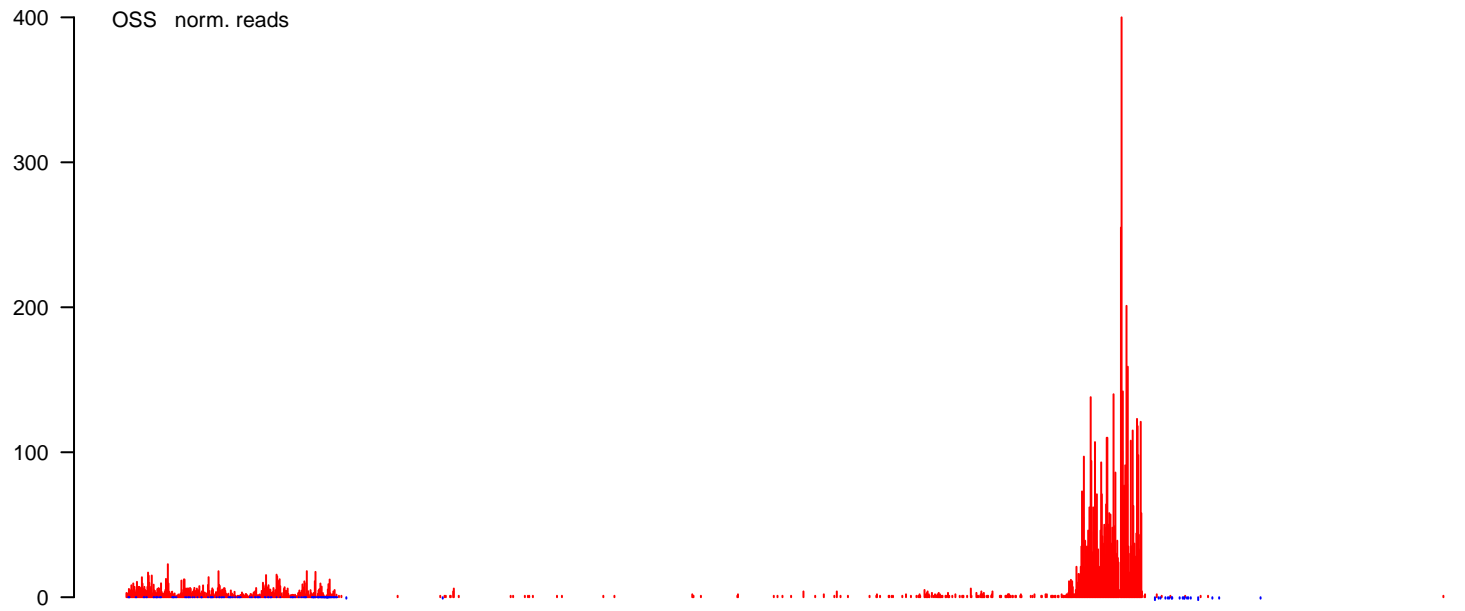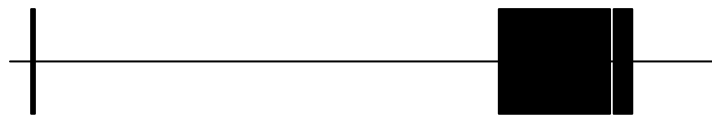

jumu 3R + 6175906 6187403

OSS unique reads

unk chr 3R : 18975368 – 18983592 –

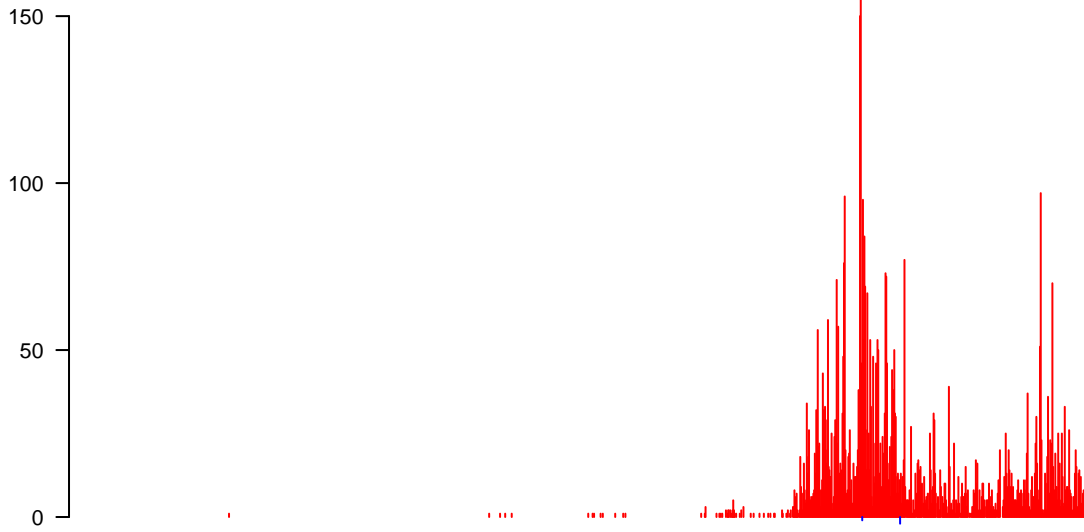

OSS norm. reads

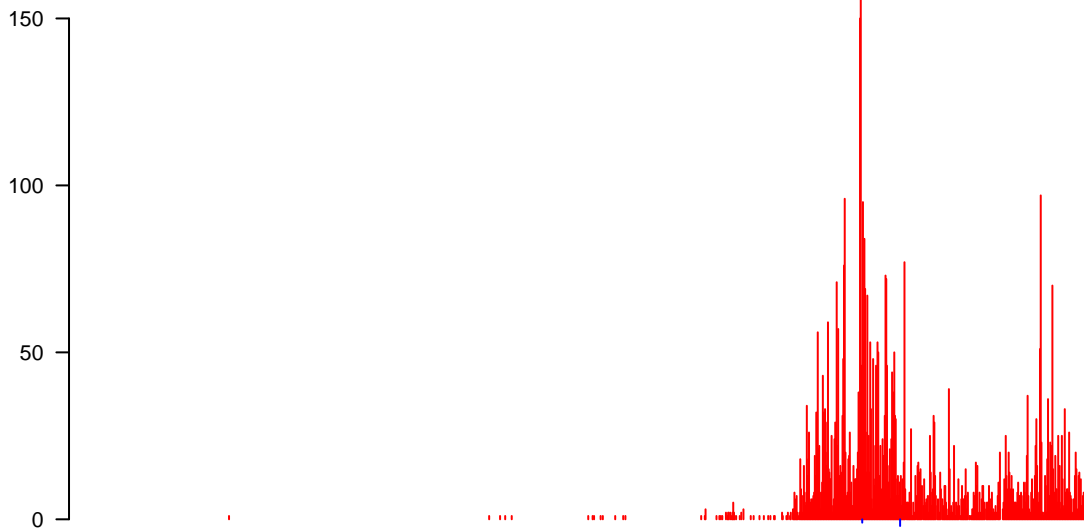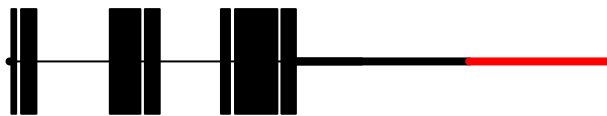

unk 3R – 18975368 18983592

OSS unique reads

Pi3K21B chr 2L : 297882 – 305225 +

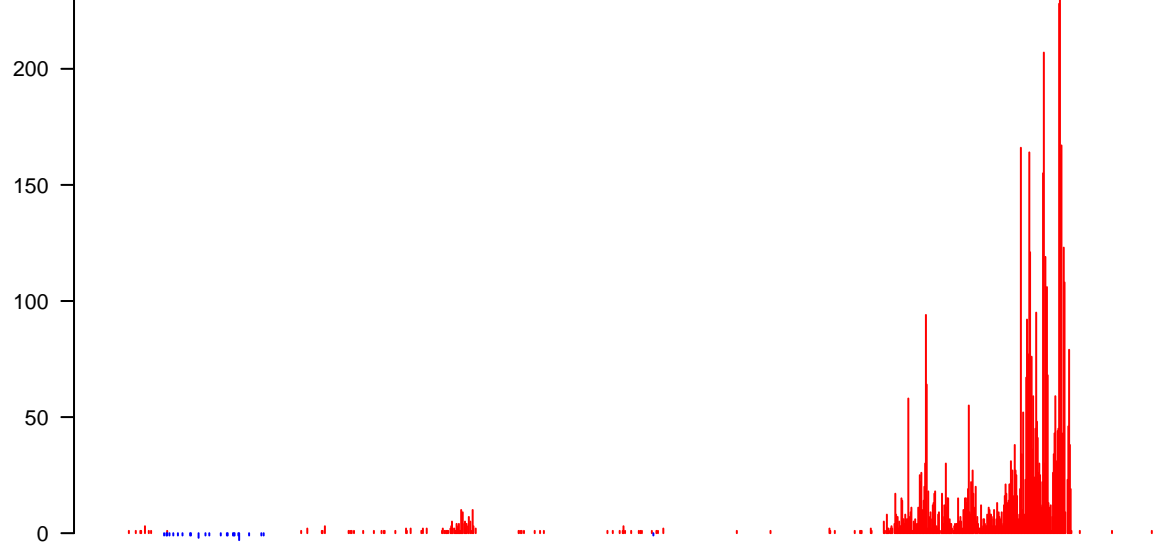

OSS norm. reads

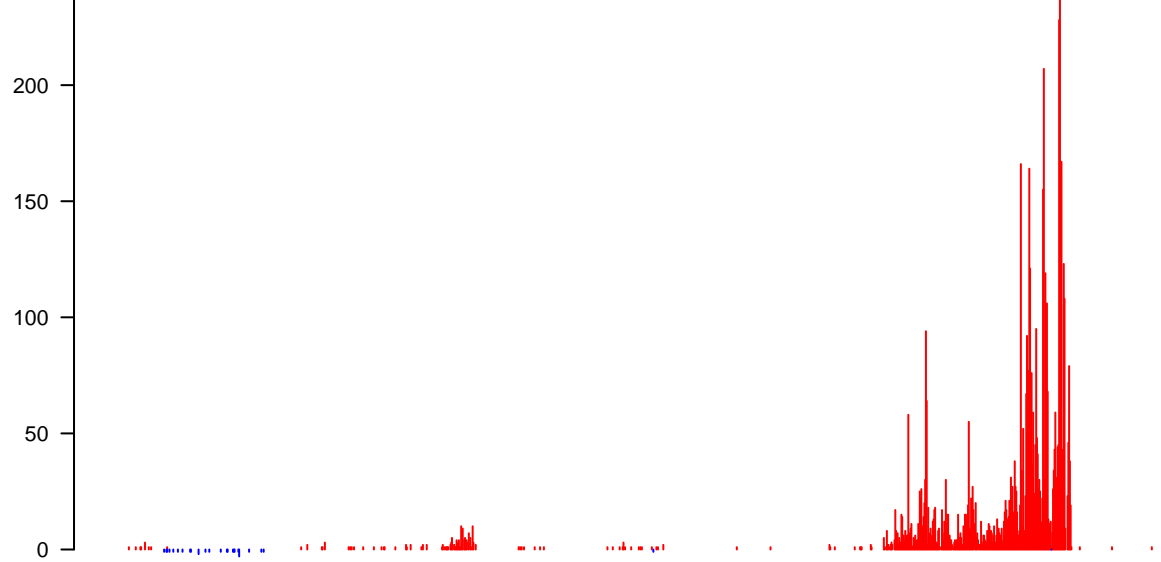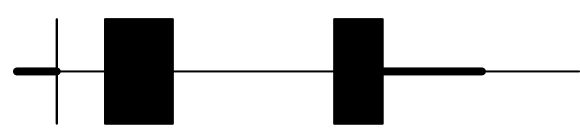

Pi3K21B 2L + 297882 305225

OSS unique reads

hdc chr 3R : 26103656 – 26193037 +

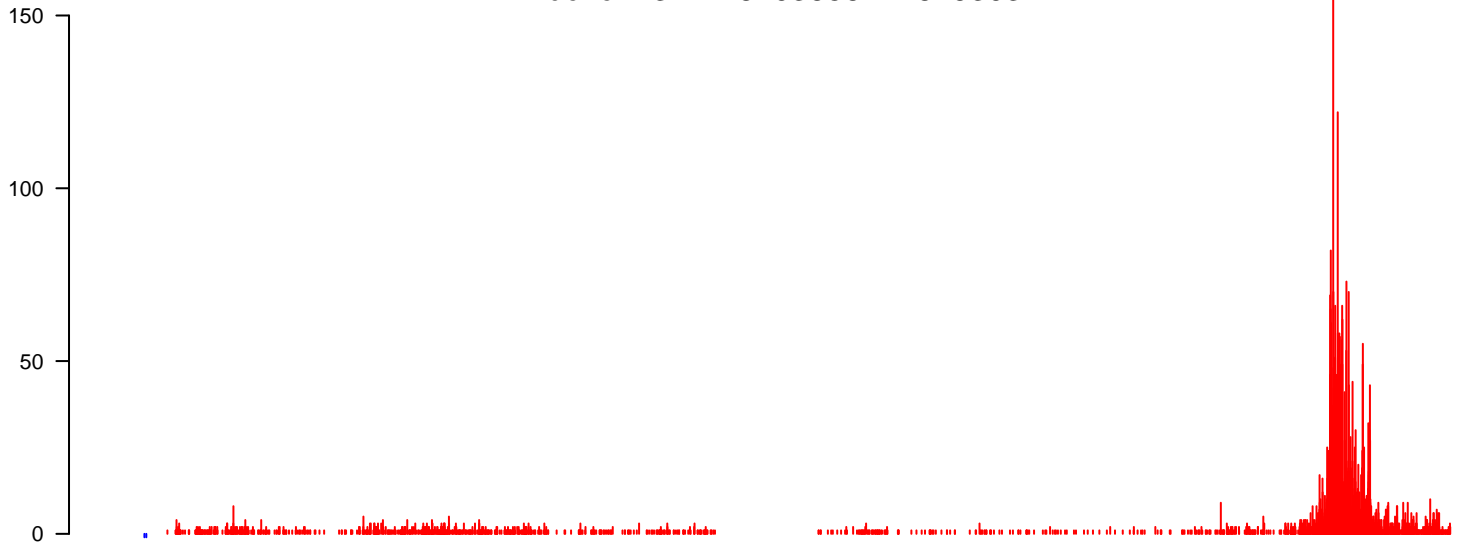

OSS norm. reads

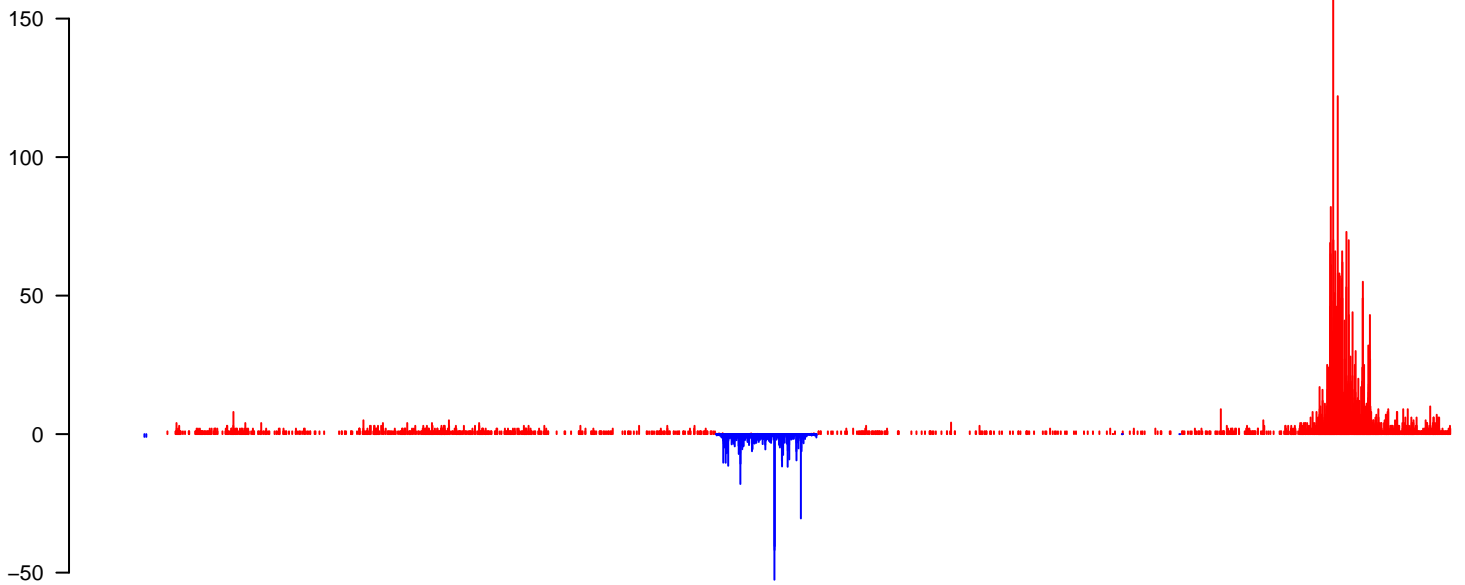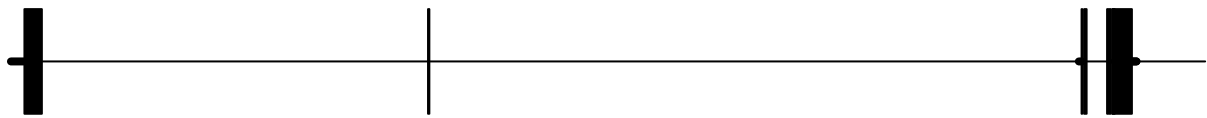

hdc 3R + 26103656 26193037

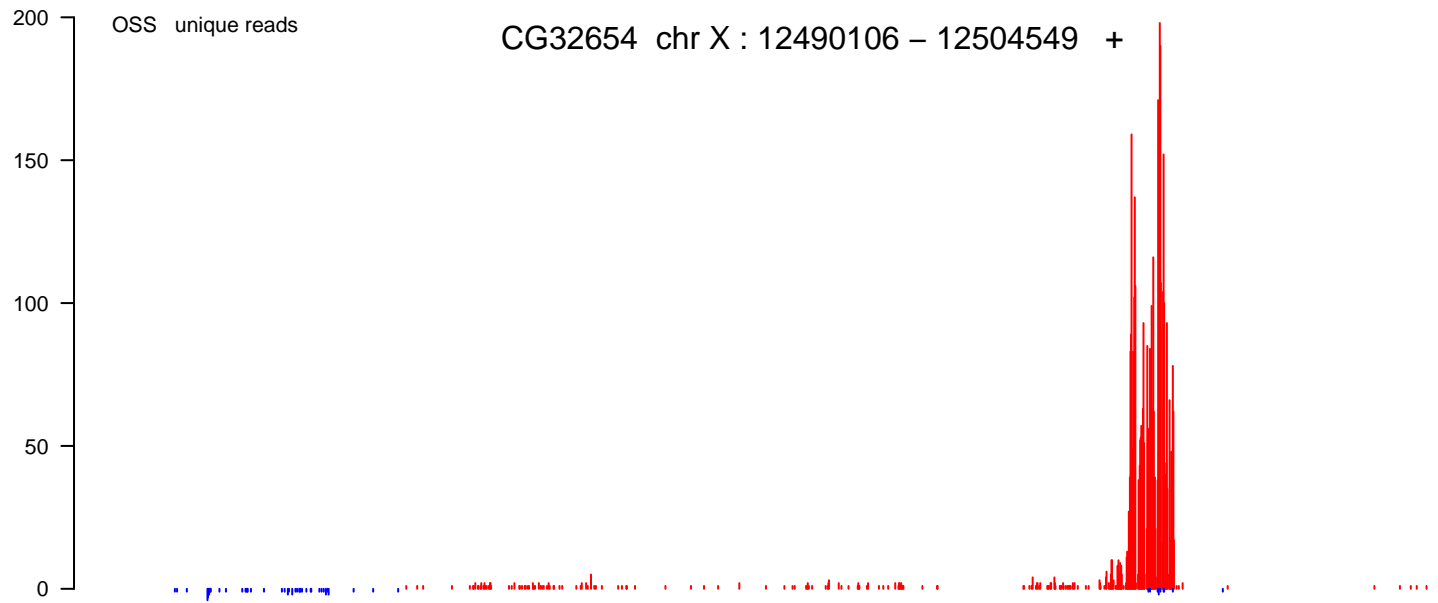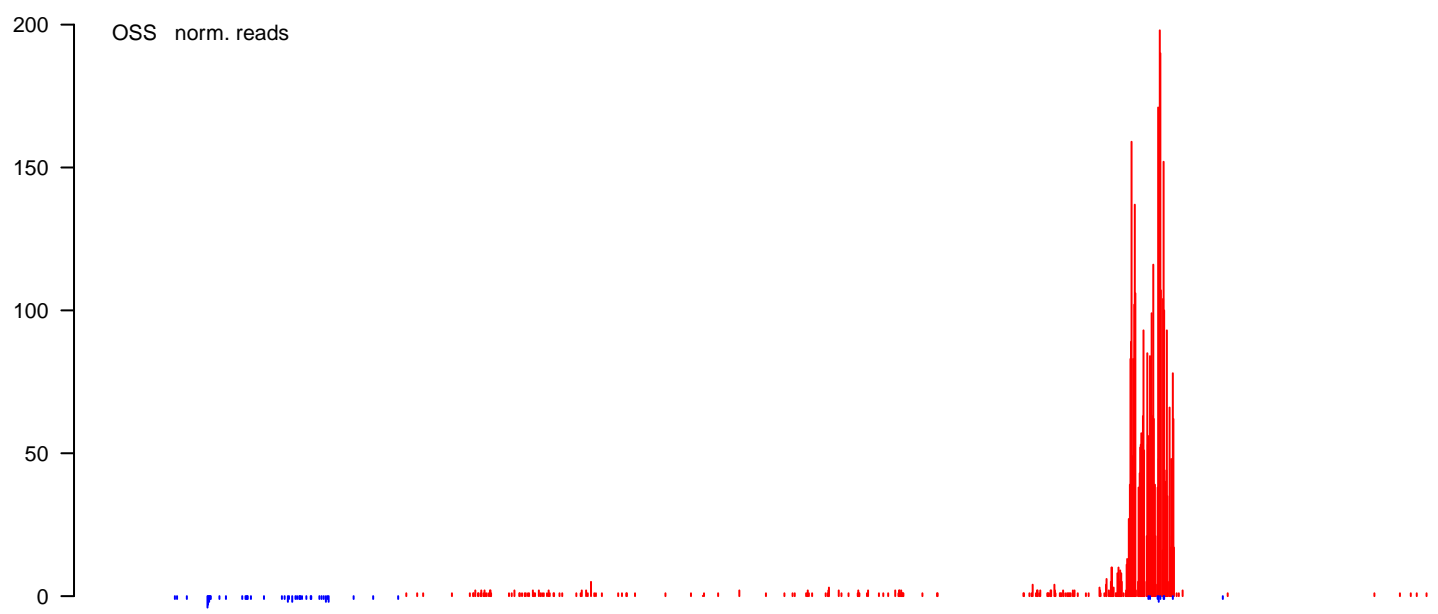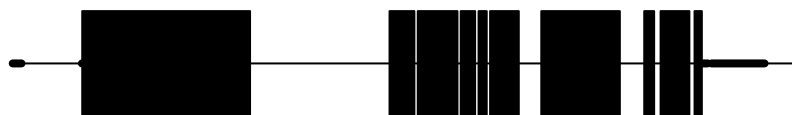

OSS unique reads

nmo chr 3L : 7972149 – 8046455 +

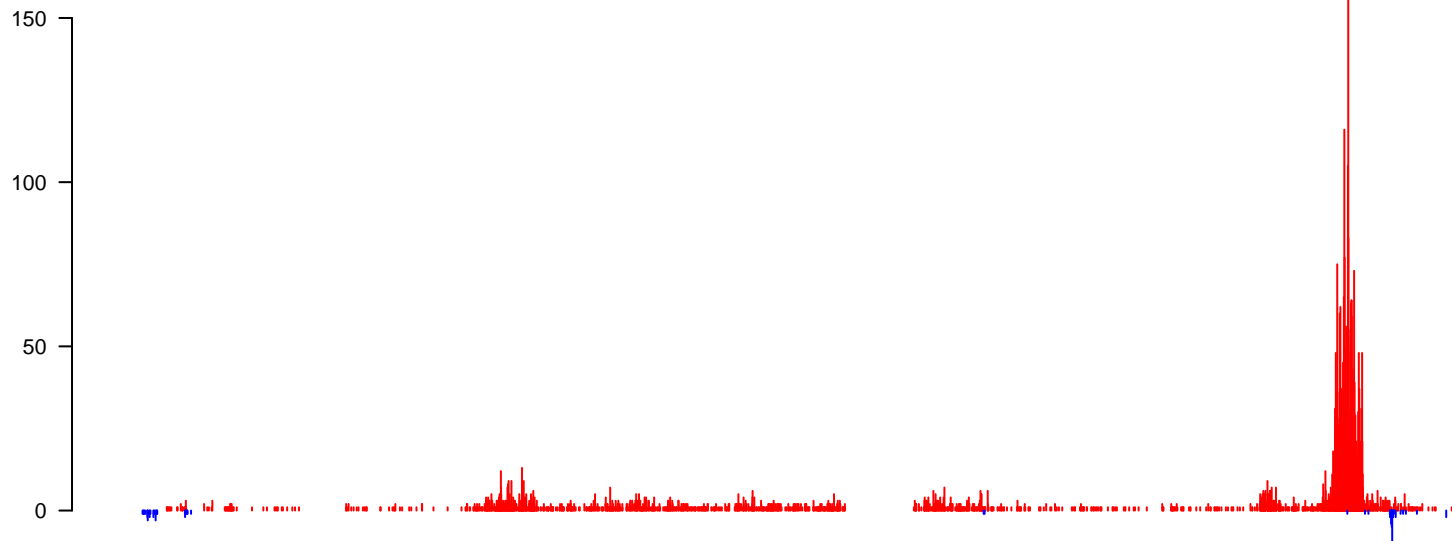

OSS norm. reads

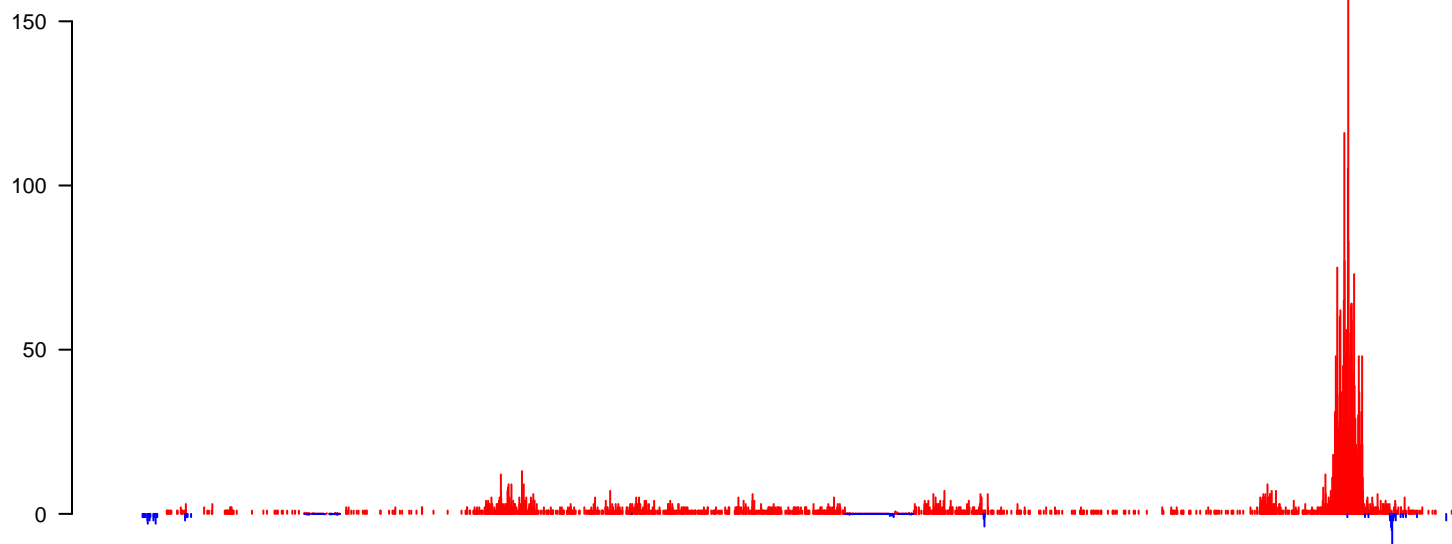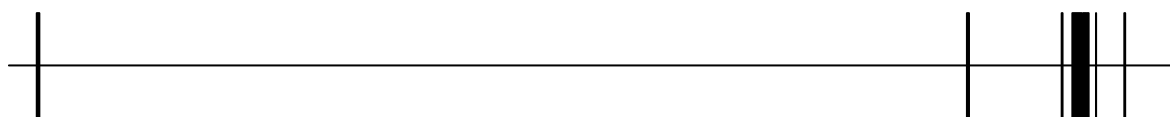

nmo 3L + 7972149 8046455

cue chr 3L : 1502551 – 1517238 –

OSS unique reads

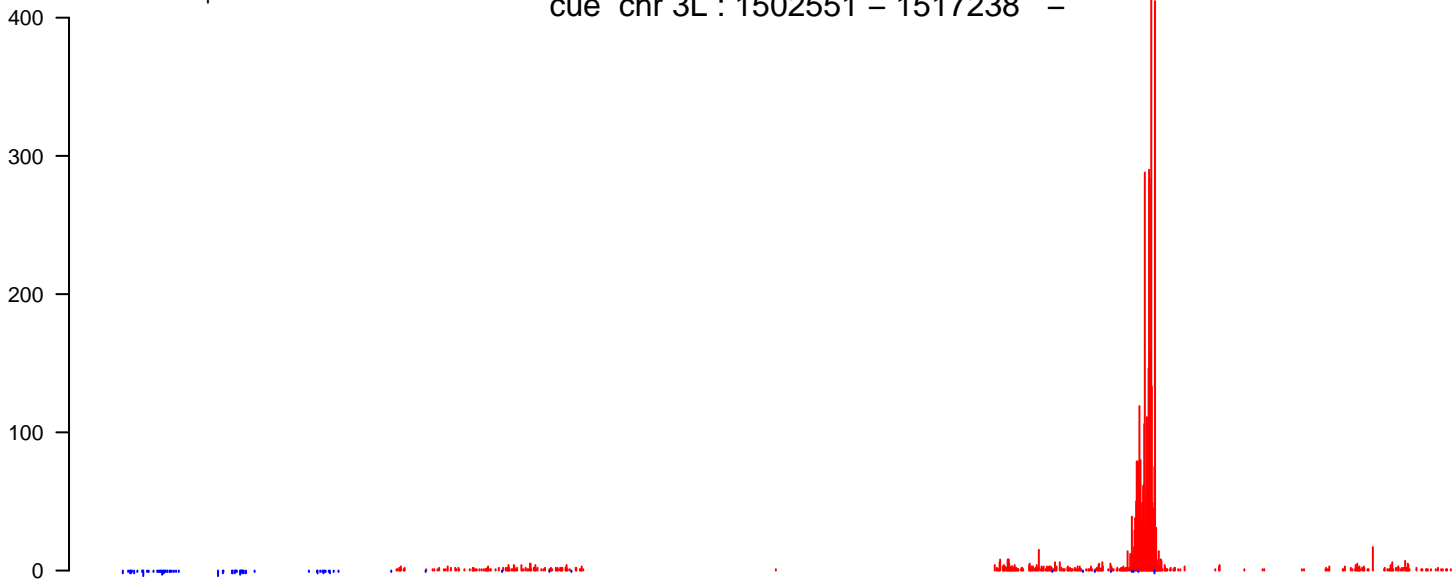

OSS norm. reads

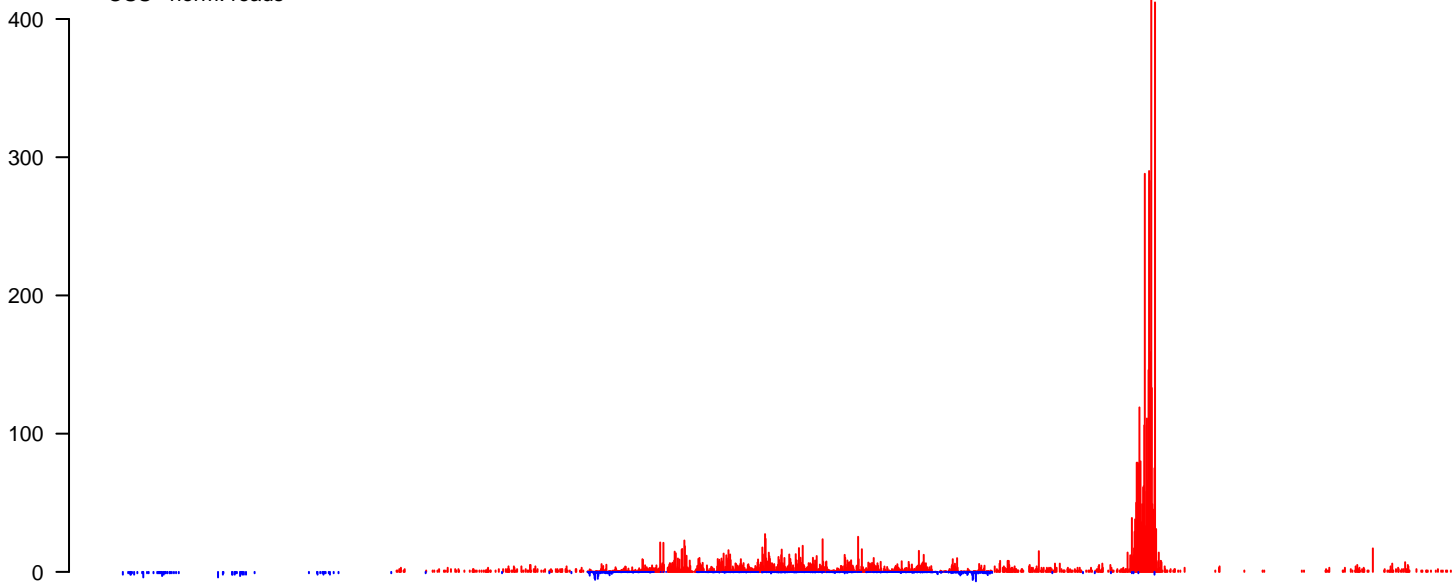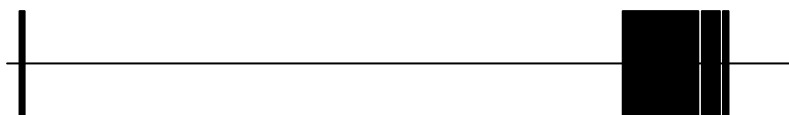

cue 3L – 1502551 1517238

OSS unique reads

CG33129 chr 2L : 10964891 – 10970275 –

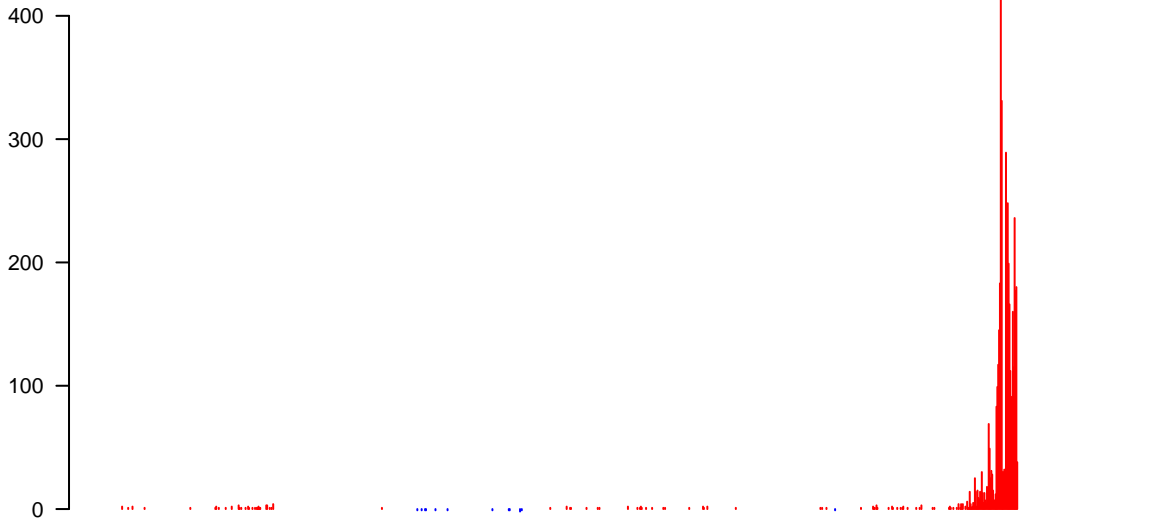

OSS norm. reads

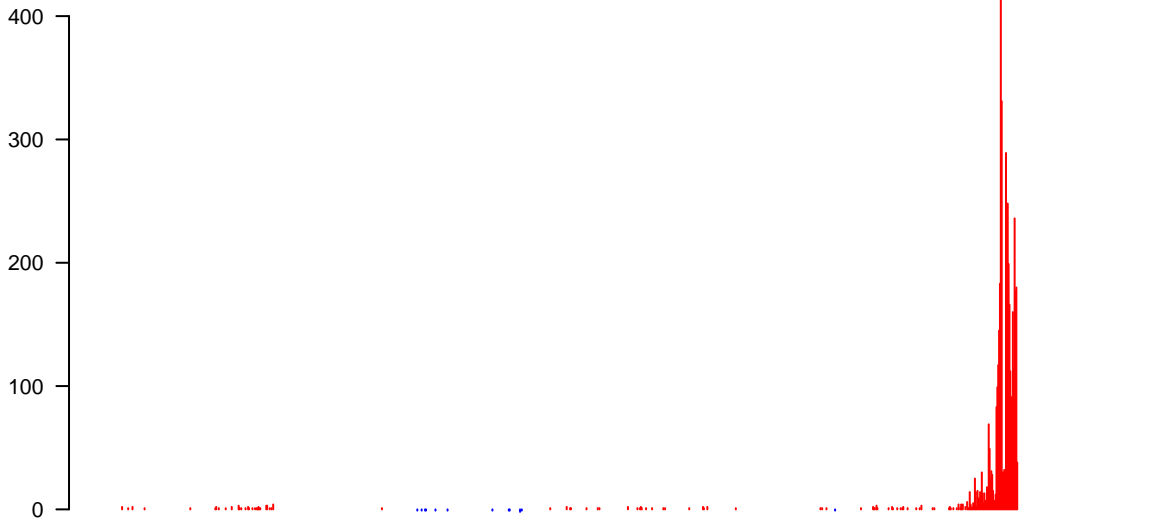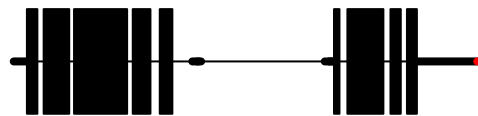

CG33129 2L – 10964891 10970275



OSS unique reads

Art4 chr 3R : 5808300 – 5811777 –

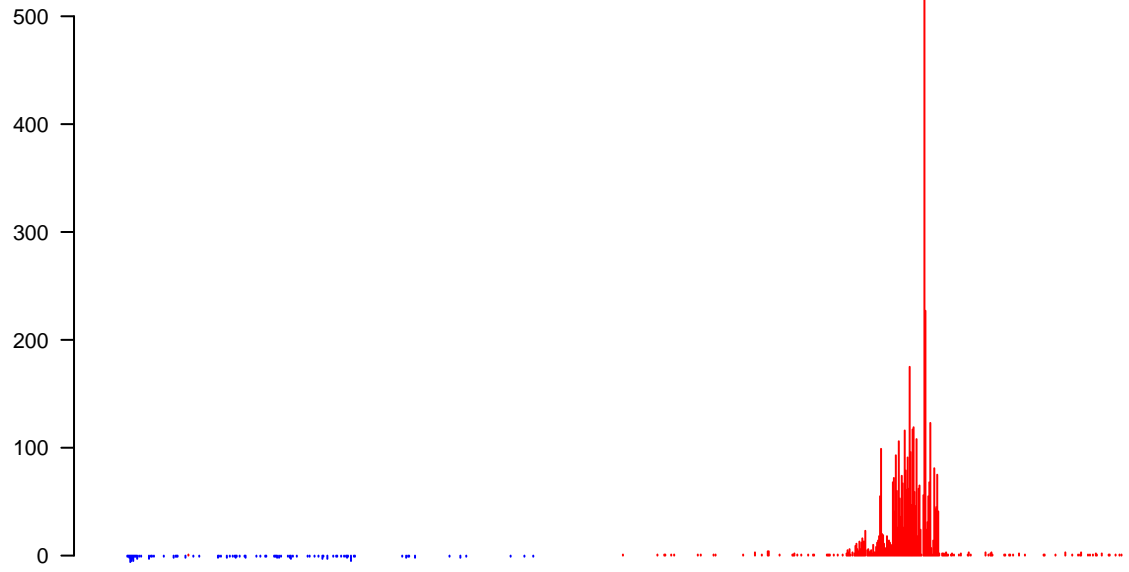

OSS norm. reads

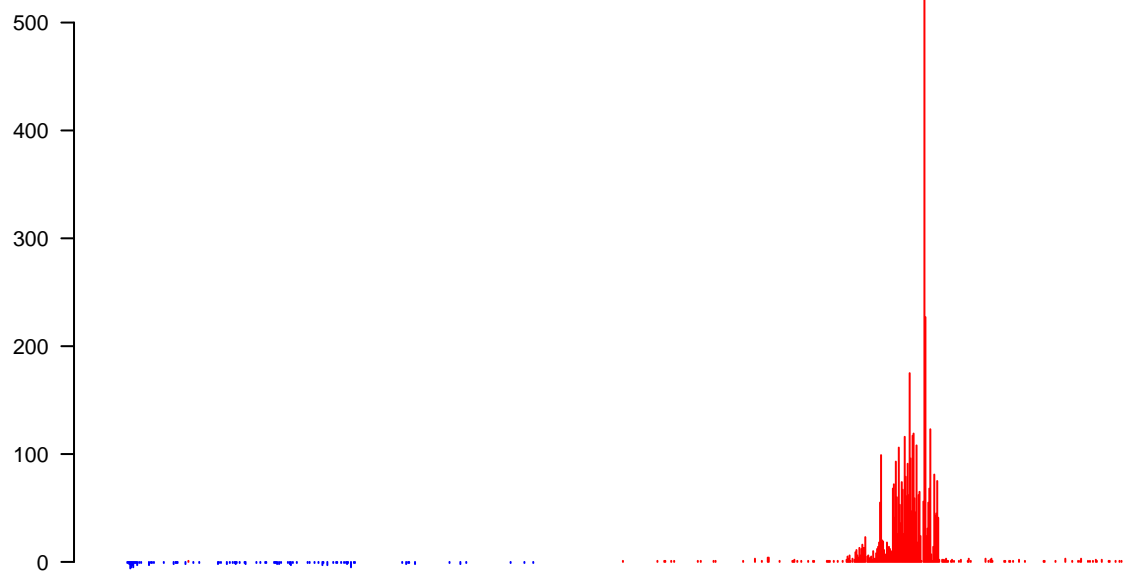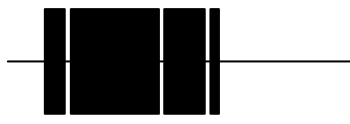

Art4 3R – 5808300 5811777

OSS unique reads

CG3164 chr 2L : 122615 – 130791 –

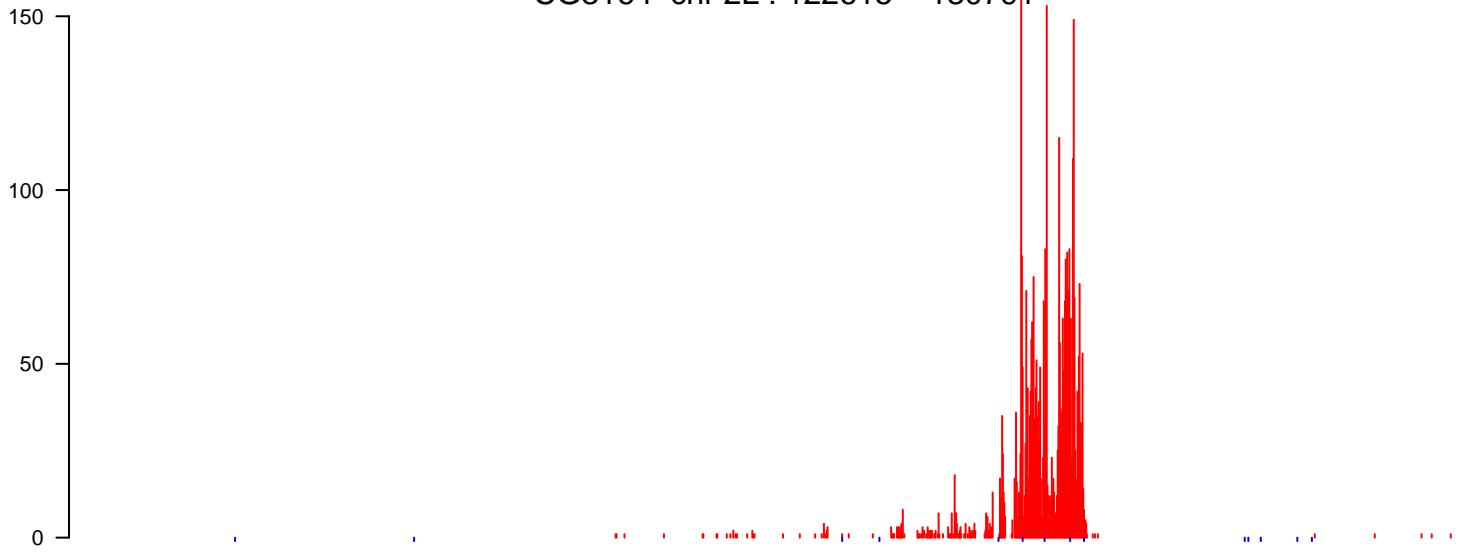

OSS norm. reads

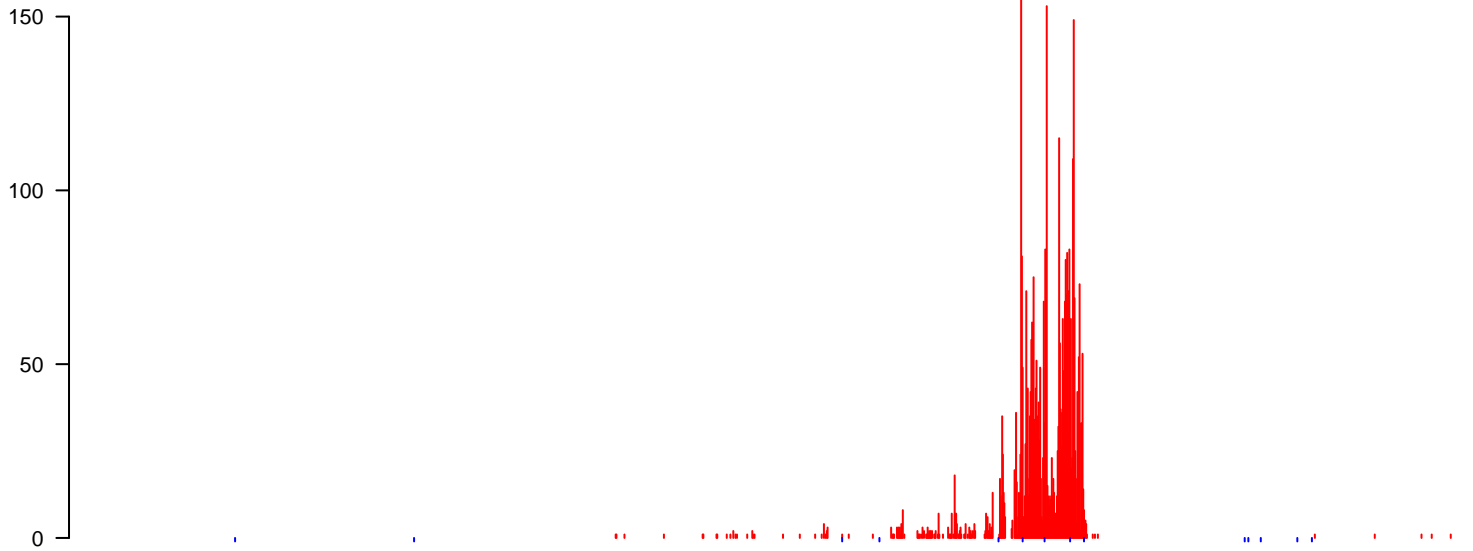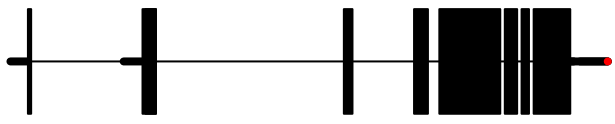

OSS unique reads

jim chr 3L : 22788253 – 22826488 –

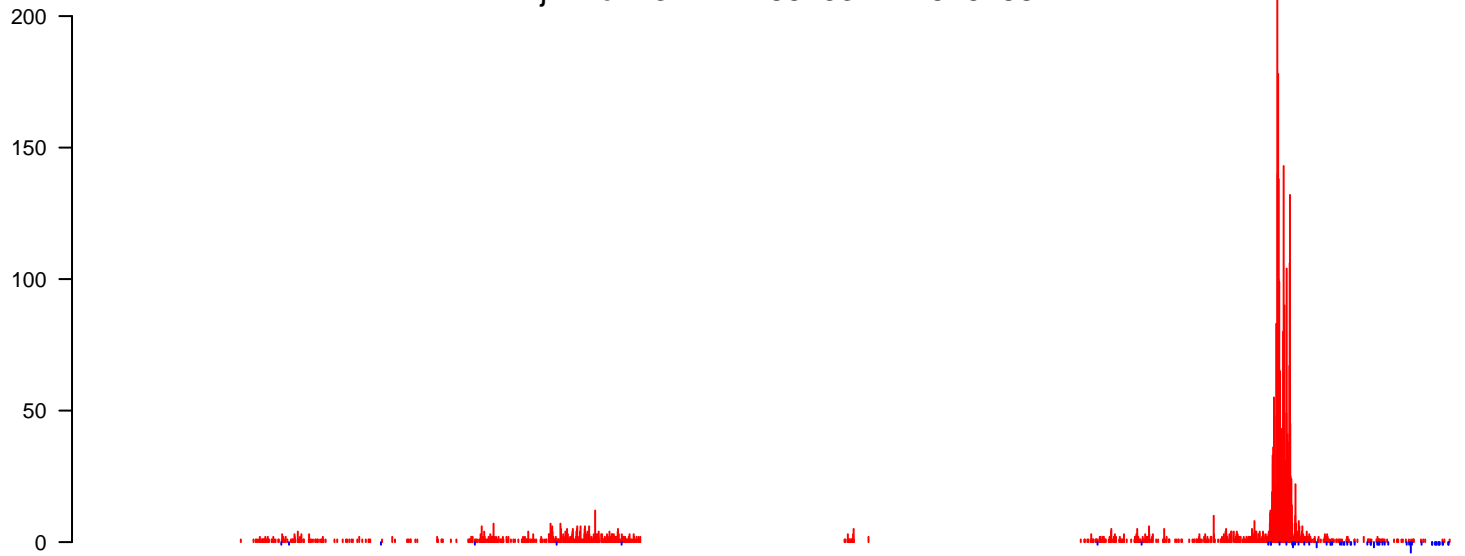

OSS norm. reads

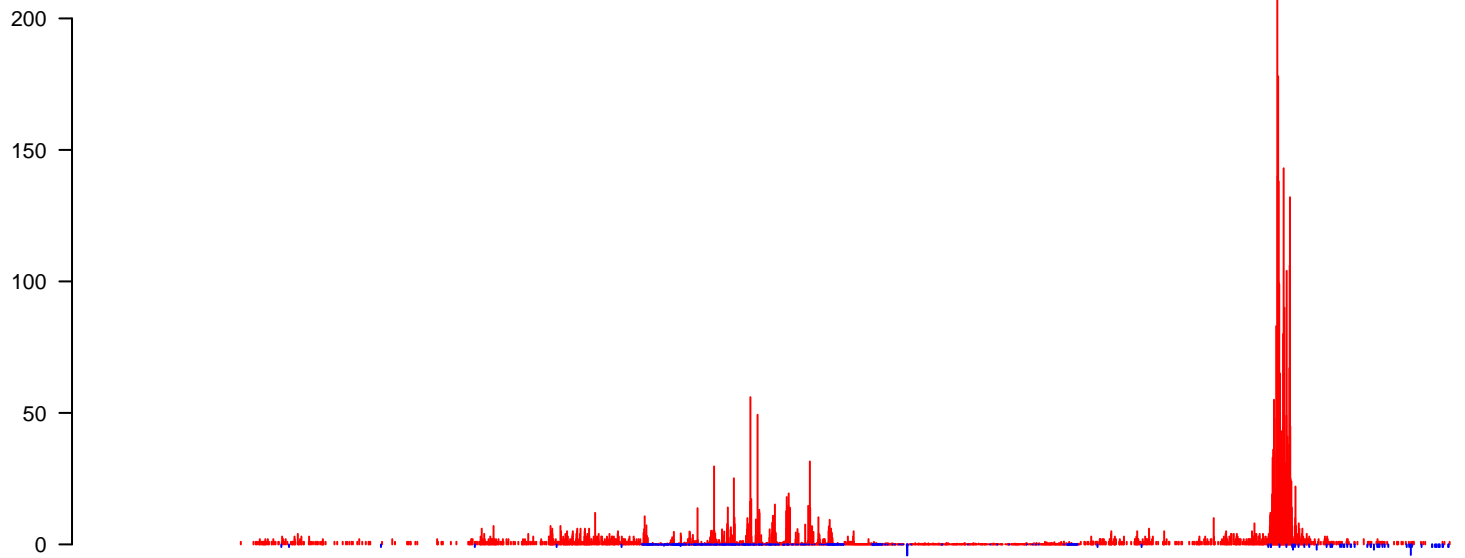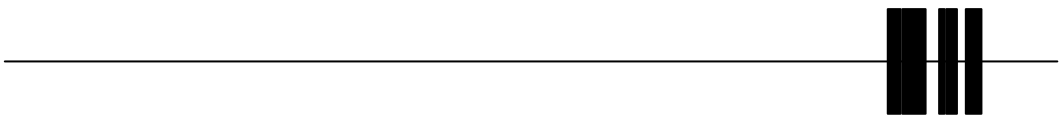

OSS unique reads

Vha16 chr 2R : 2512744 – 2520633 –

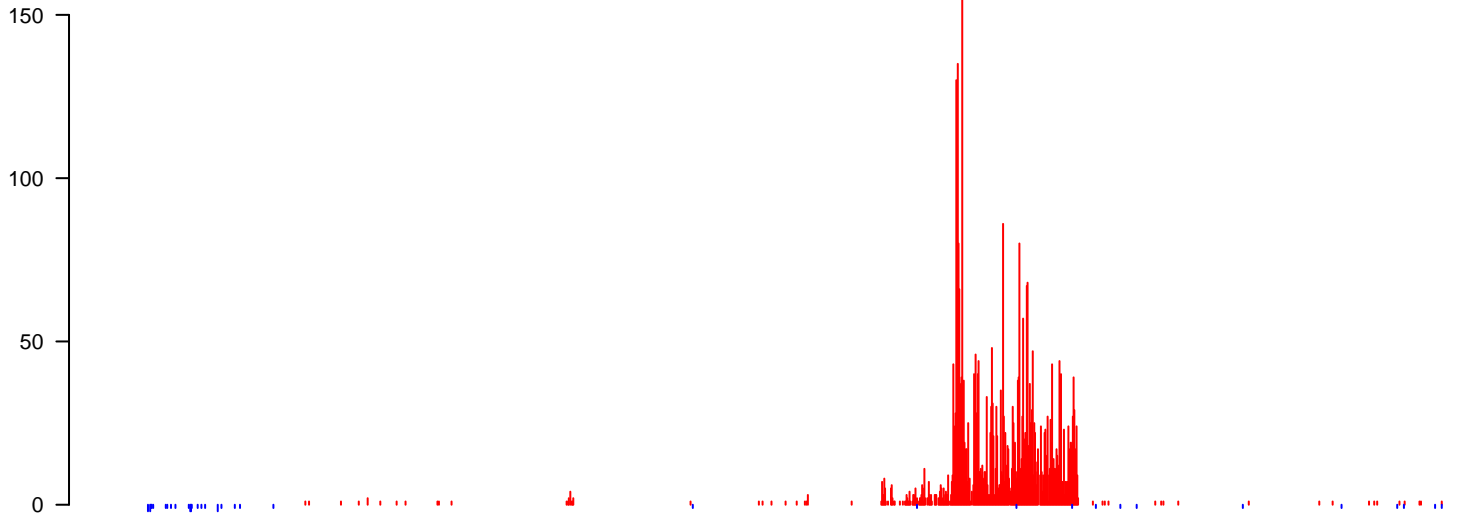

OSS norm. reads

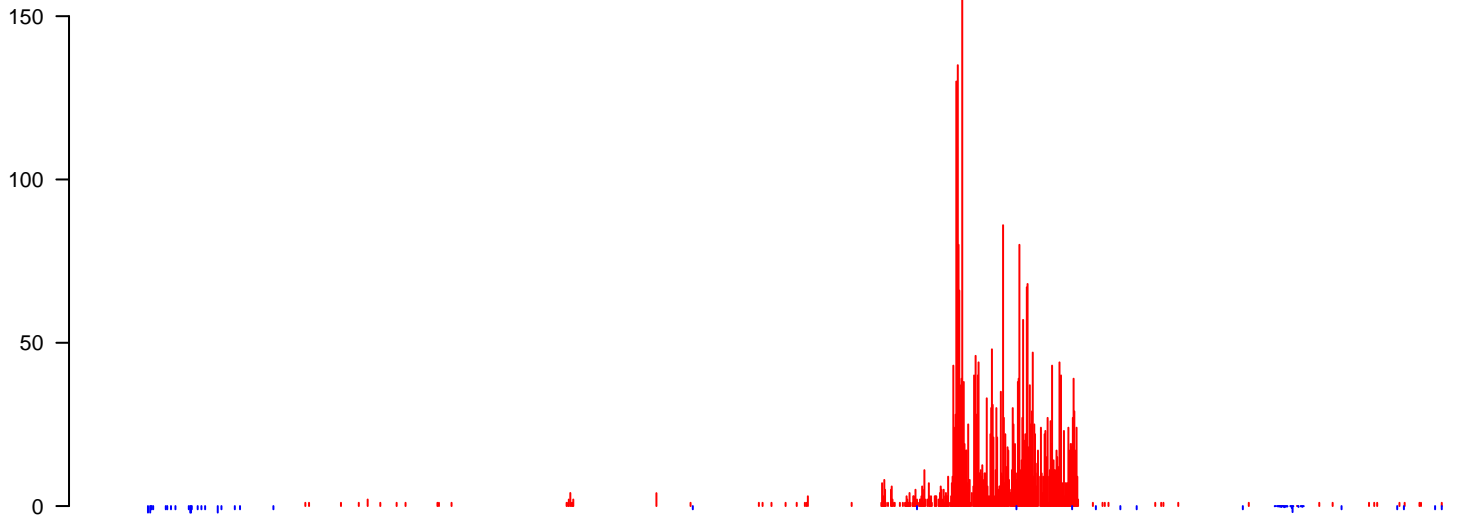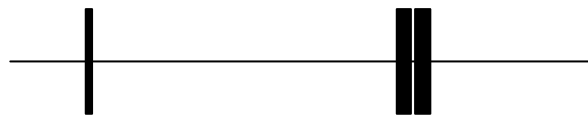

Vha16 2R – 2512744 2520633

OSS unique reads

Khc-73 chr 2R : 11403283 – 11419743

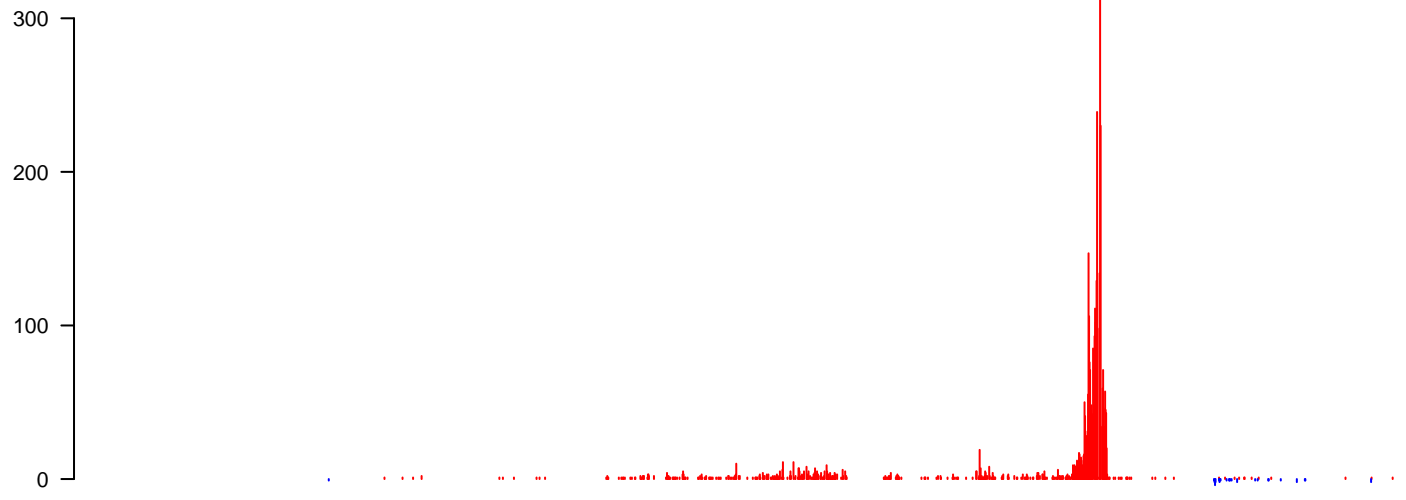

OSS norm. reads

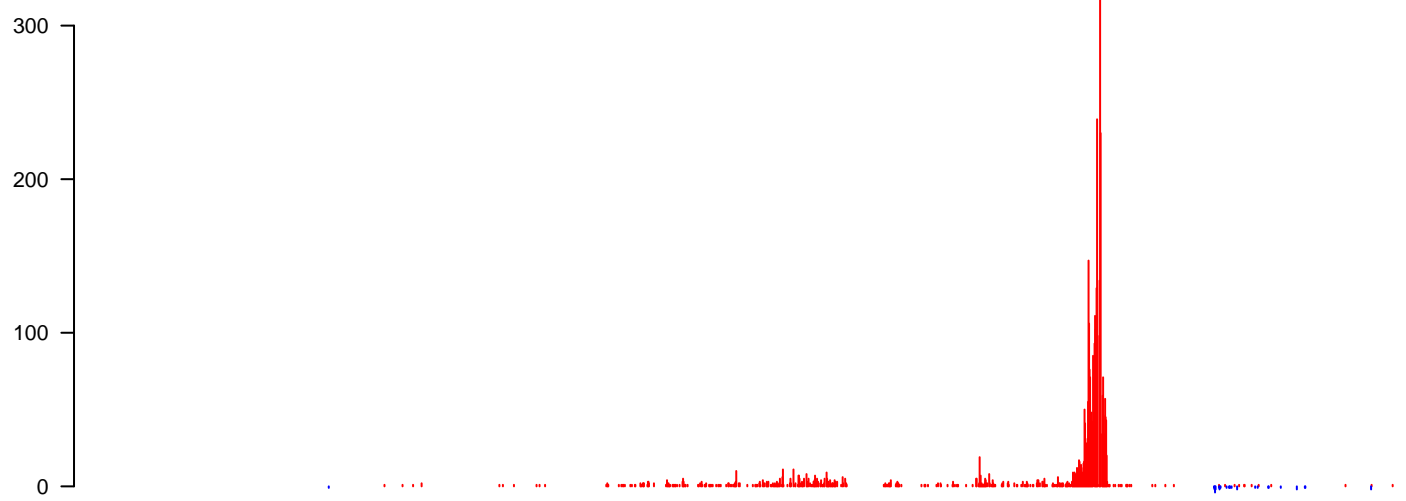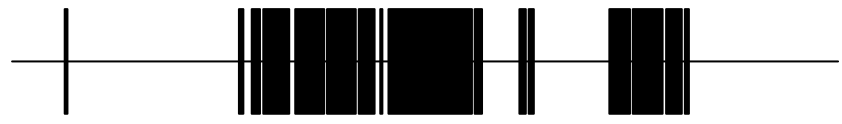

Khc-73 2R – 11403283 11419743

OSS unique reads

CG5521 chr 3R : 22792463 – 22803655 +

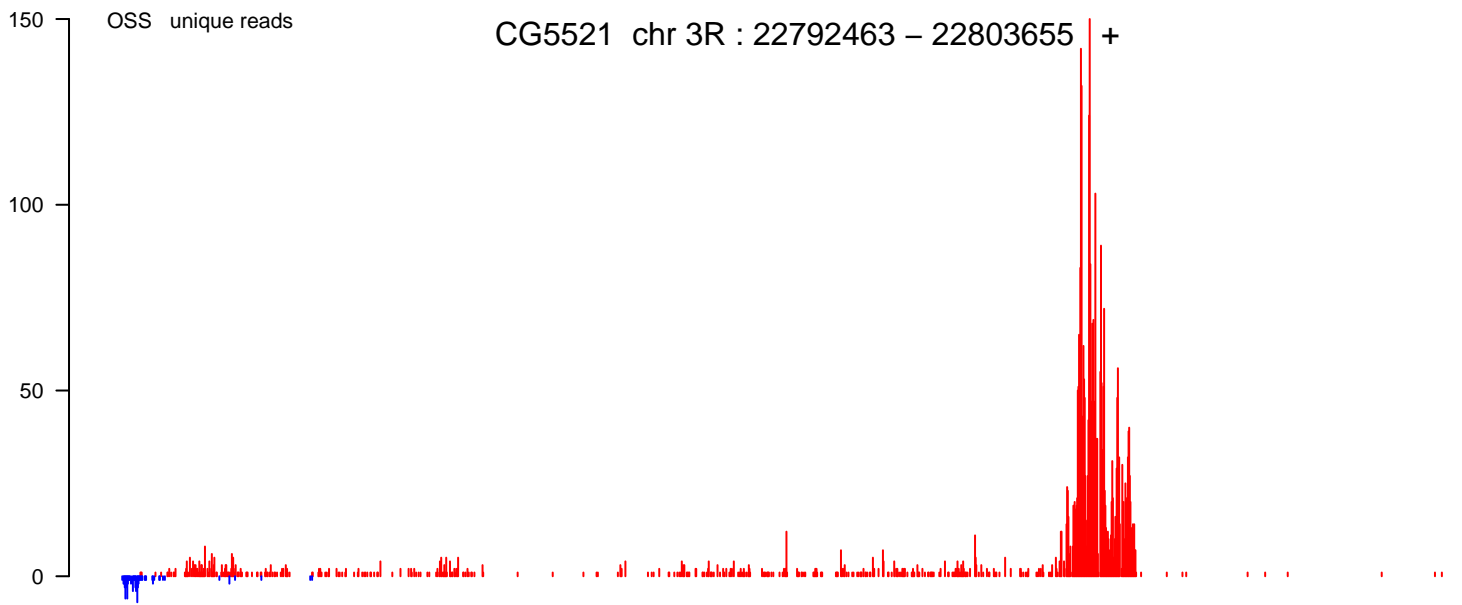

OSS norm. reads

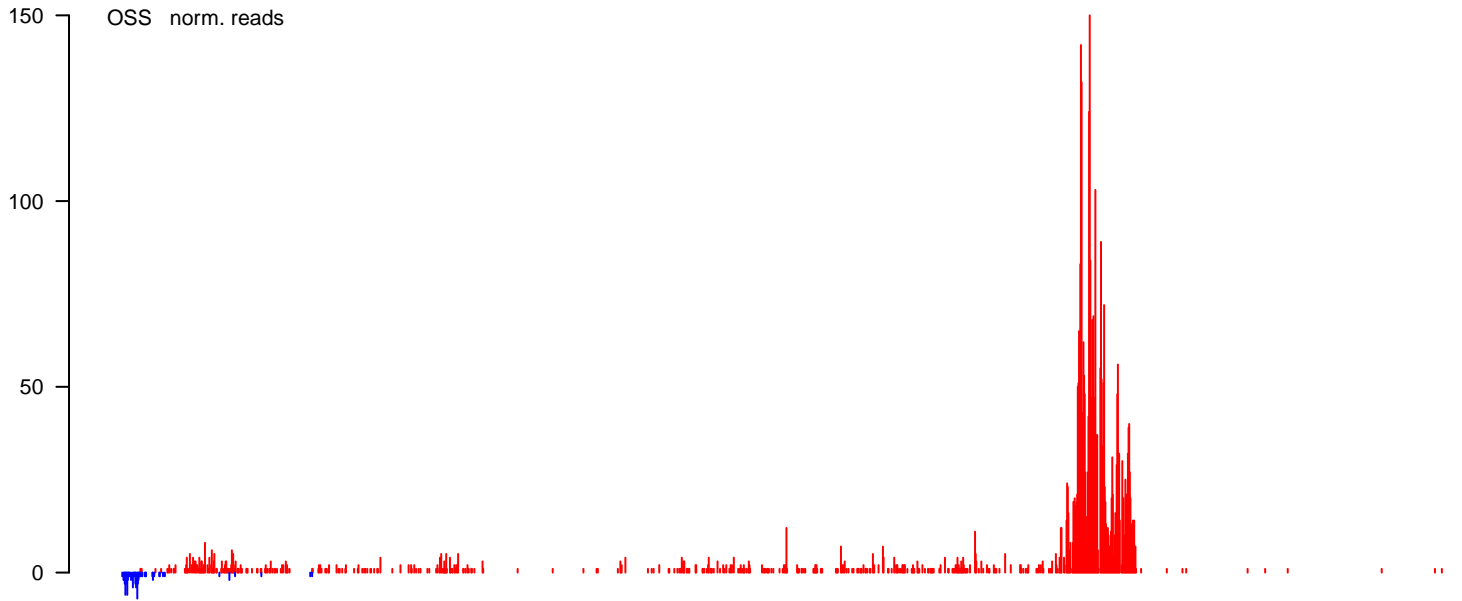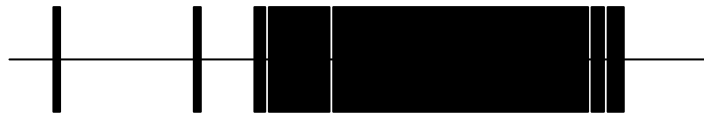

CG5521 3R + 22792463 22803655

Baldspot chr 3L : 16641275 – 16654727

OSS unique reads

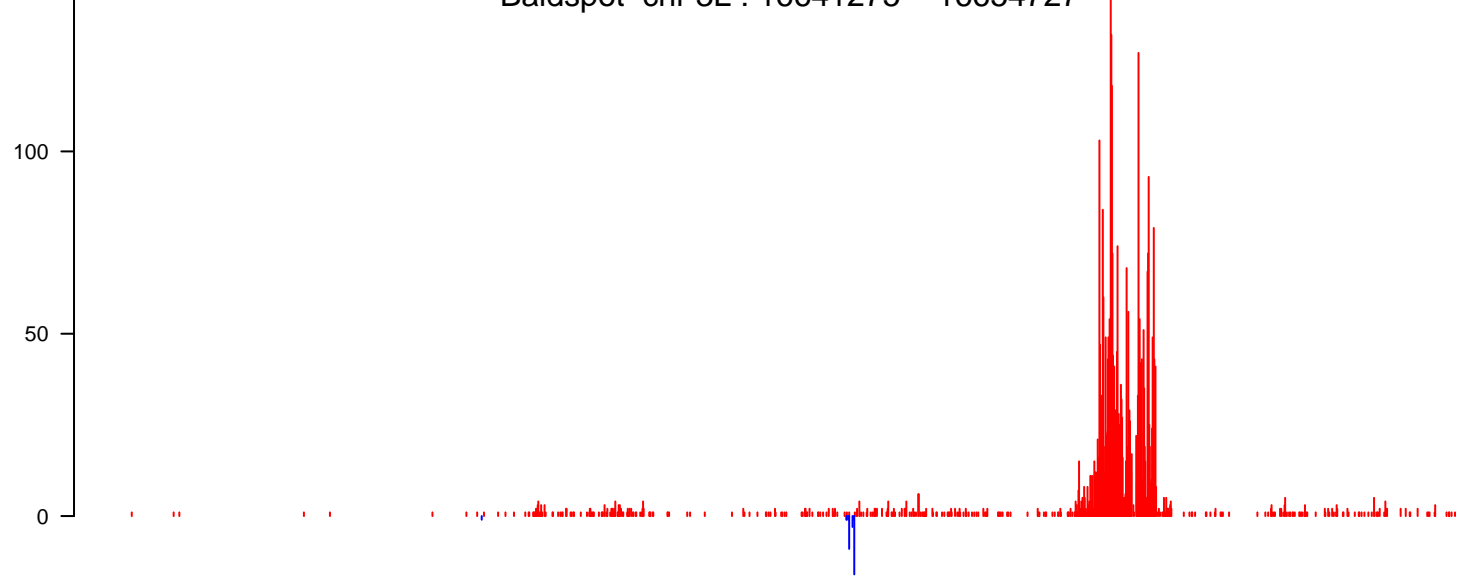

OSS norm. reads

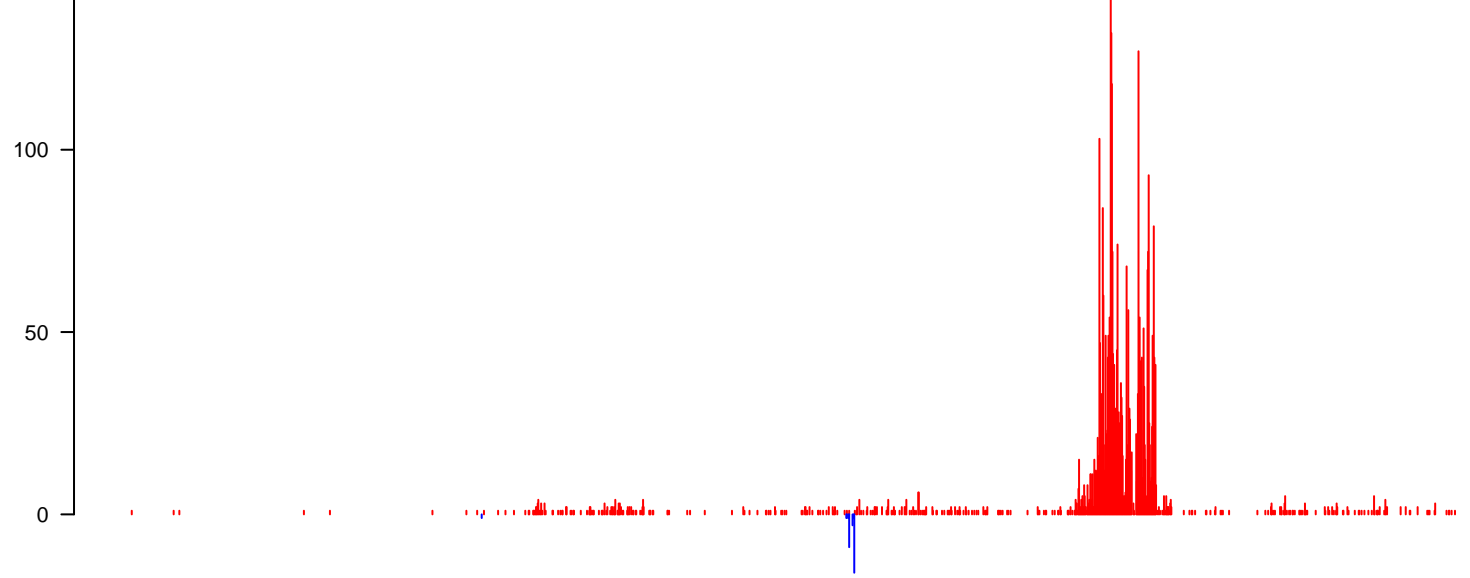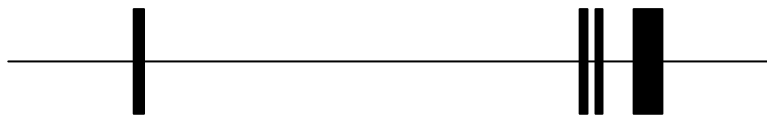

OSS unique reads

smi21F chr 2L : 1114651 – 1128953 –

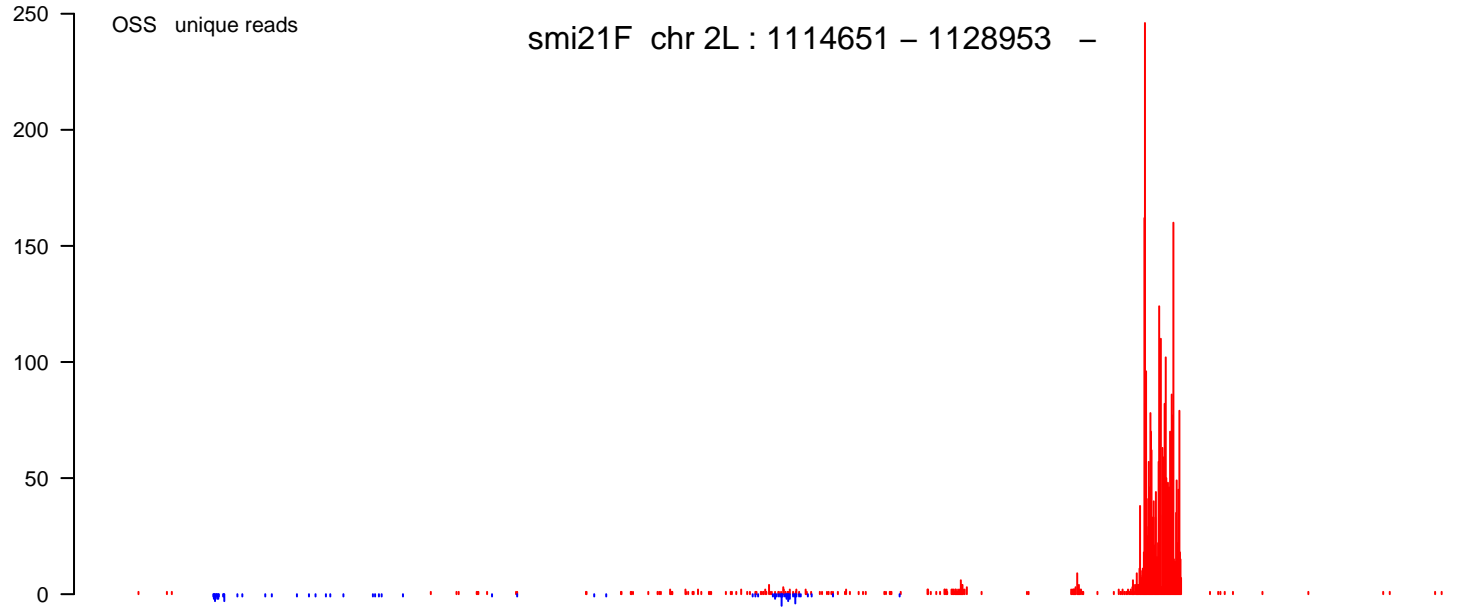

OSS norm. reads

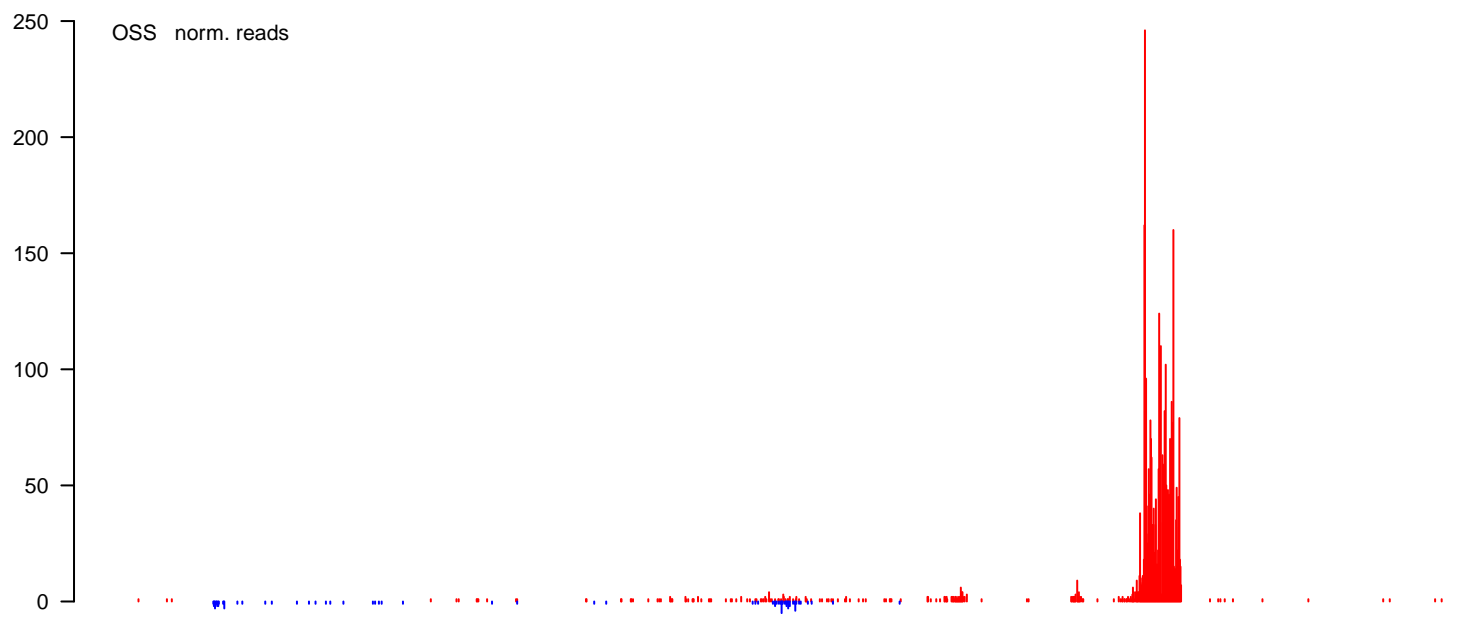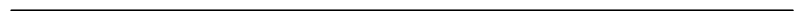



OSS unique reads

Bsg chr 2L : 8083422 – 8110561 +

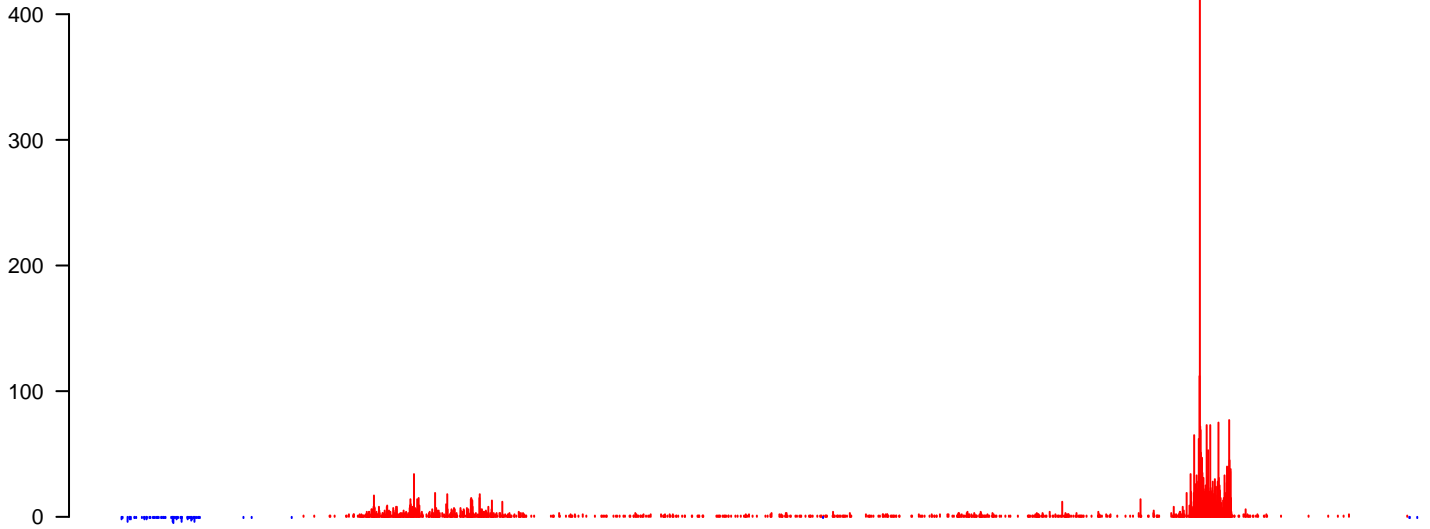

OSS norm. reads

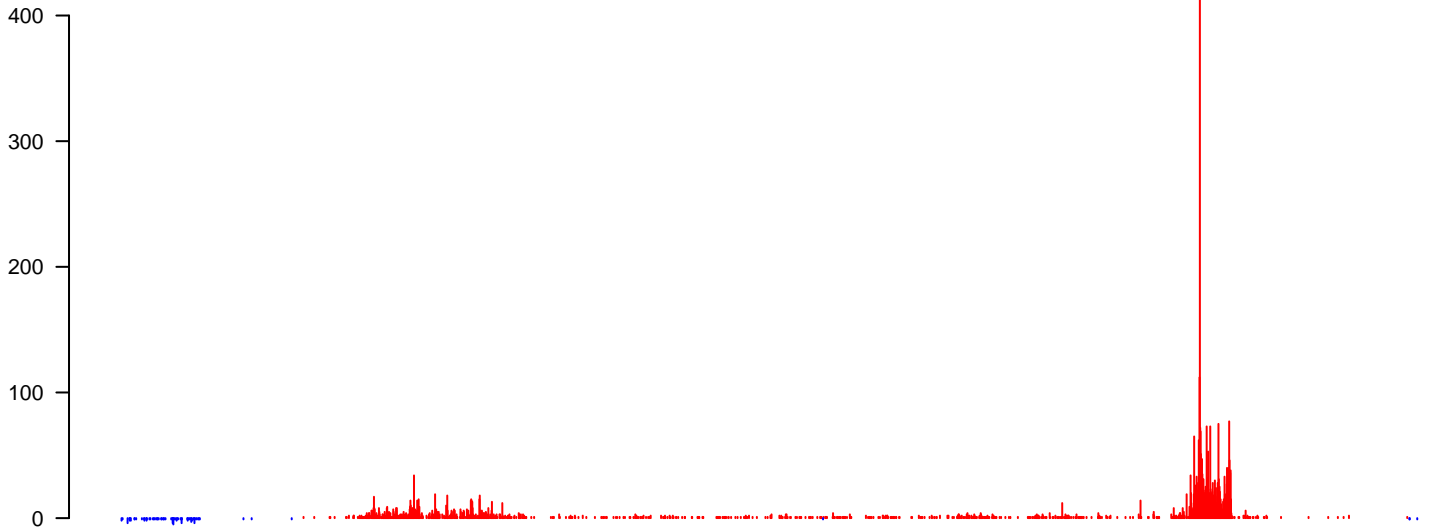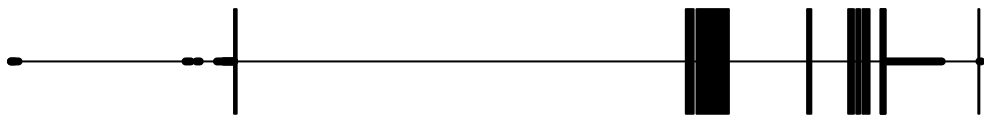

OSS unique reads

CG6701 chr 2R : 9860477 – 9866564 –

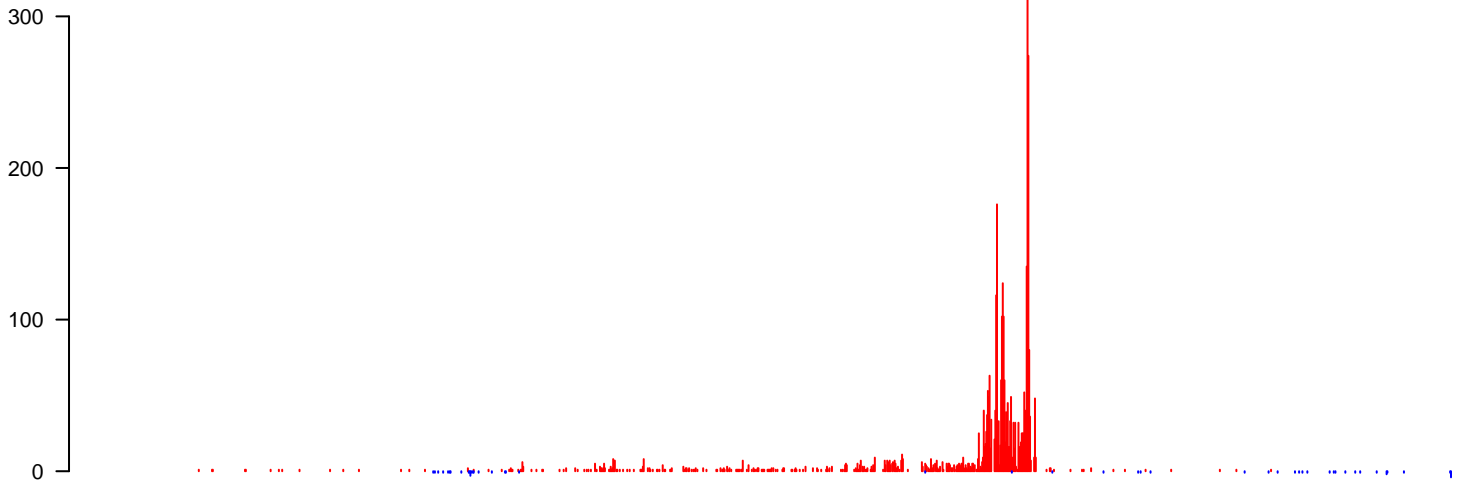

OSS norm. reads

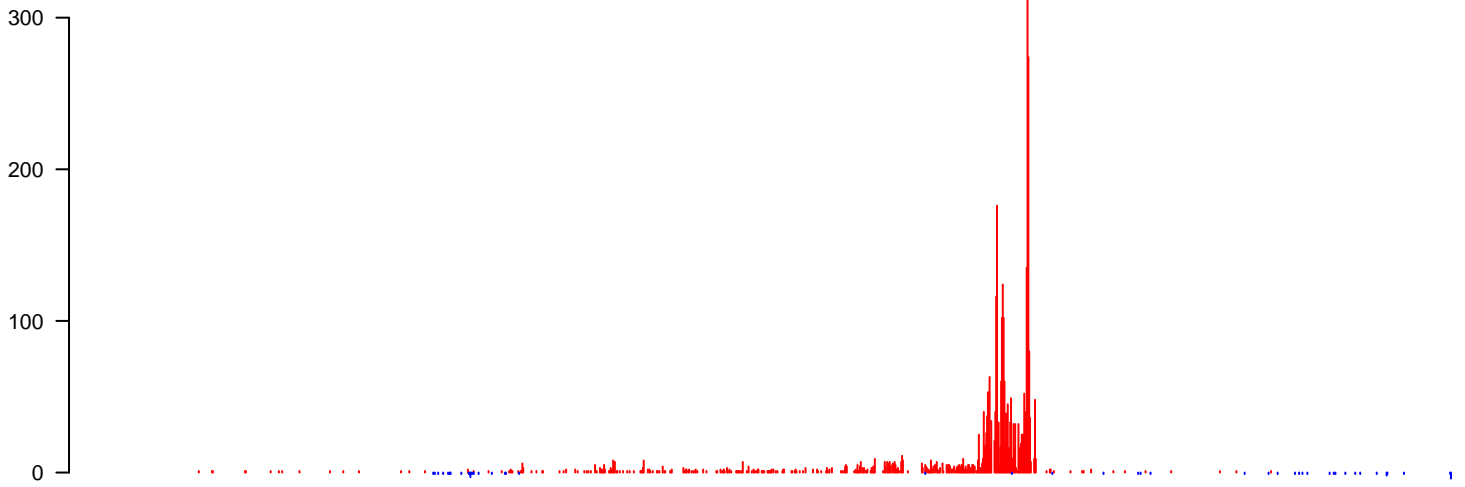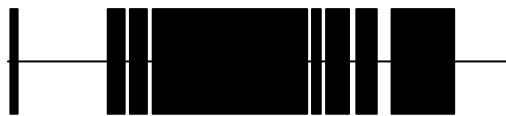

CG6701 2R – 9860477 9866564

OSS unique reads

emc chr 3L : 749406 – 753505 +

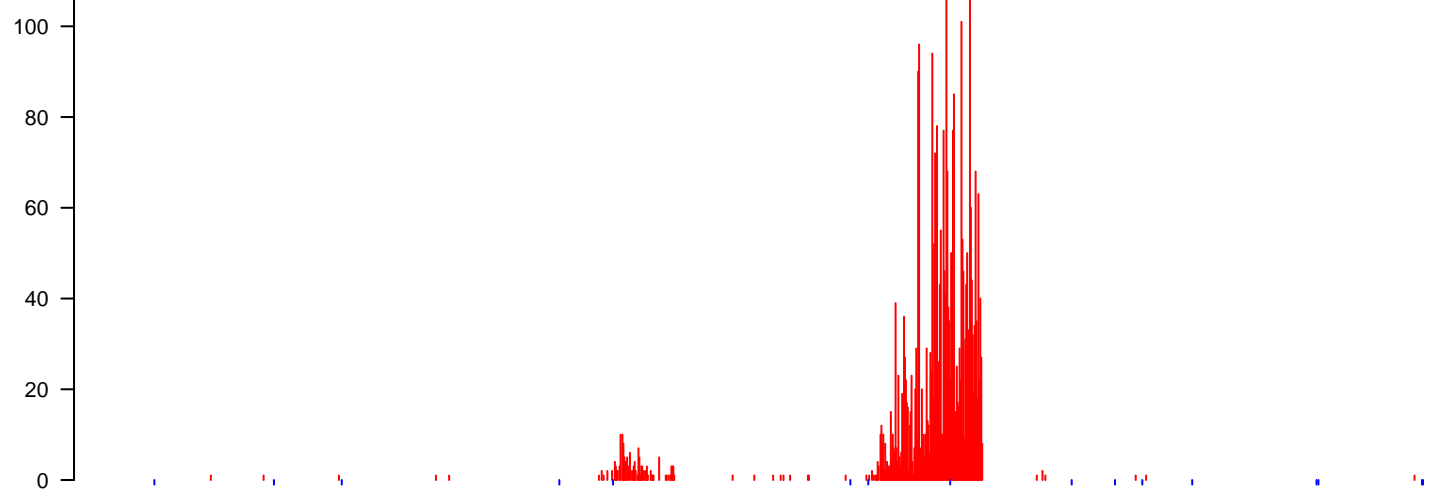

OSS norm. reads

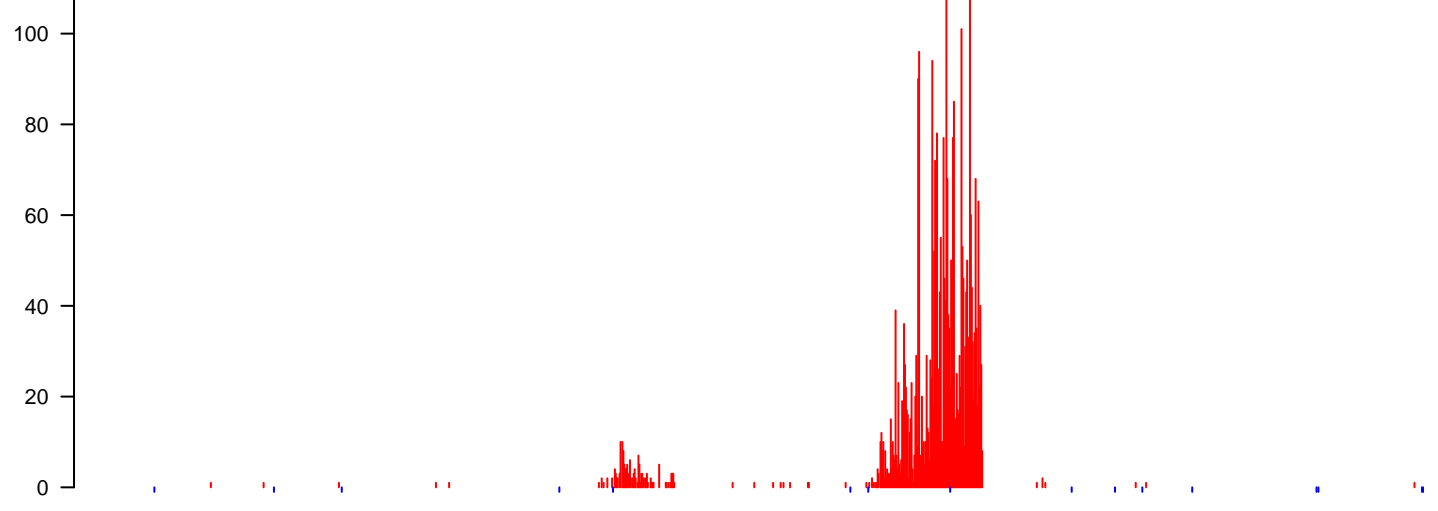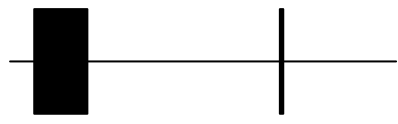

emc 3L + 749406 753505

OSS unique reads

CG11319 chr 2L : 6568384 – 6601066 –

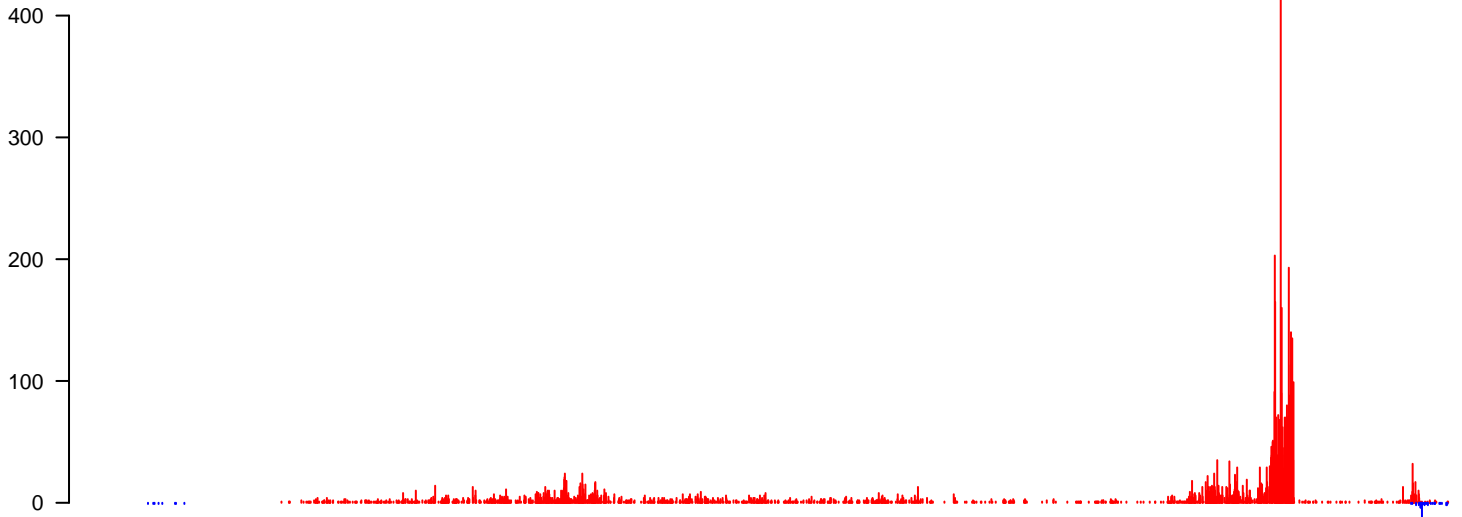

OSS norm. reads

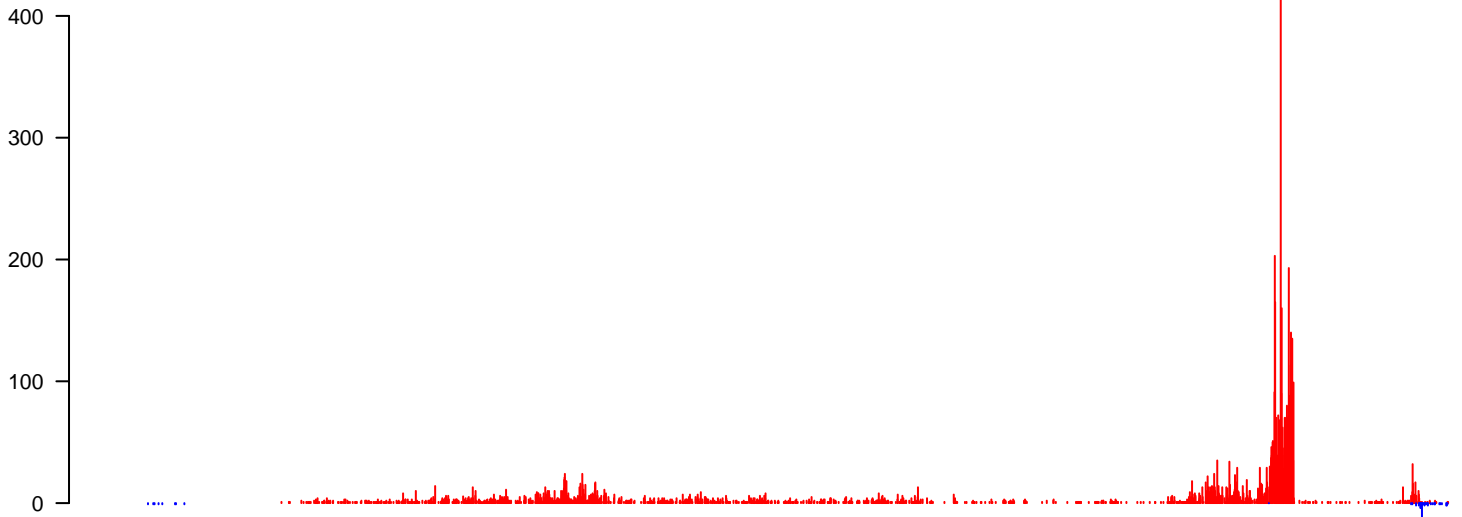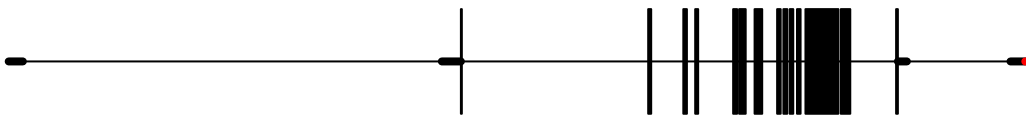

CG11319 2L – 6568384 6601066

OSS unique reads

CG3409 chr 2R : 2587195 – 2603370 –

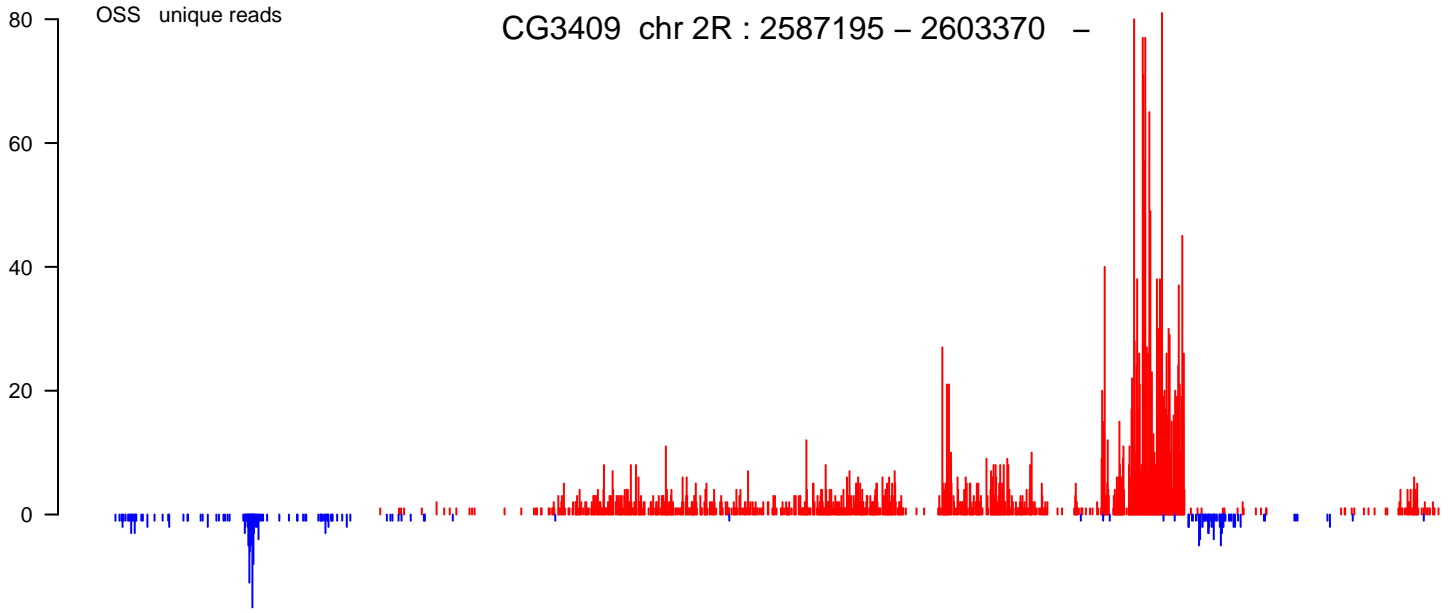

OSS norm. reads

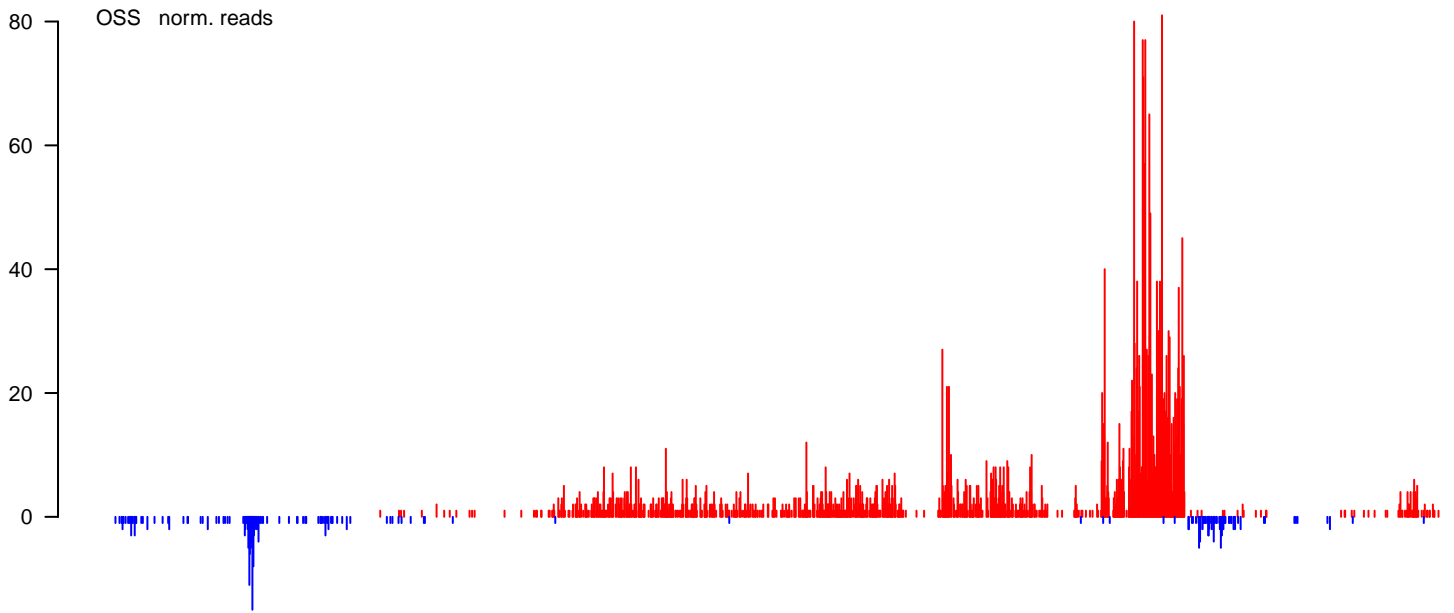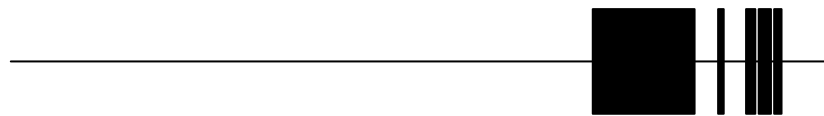

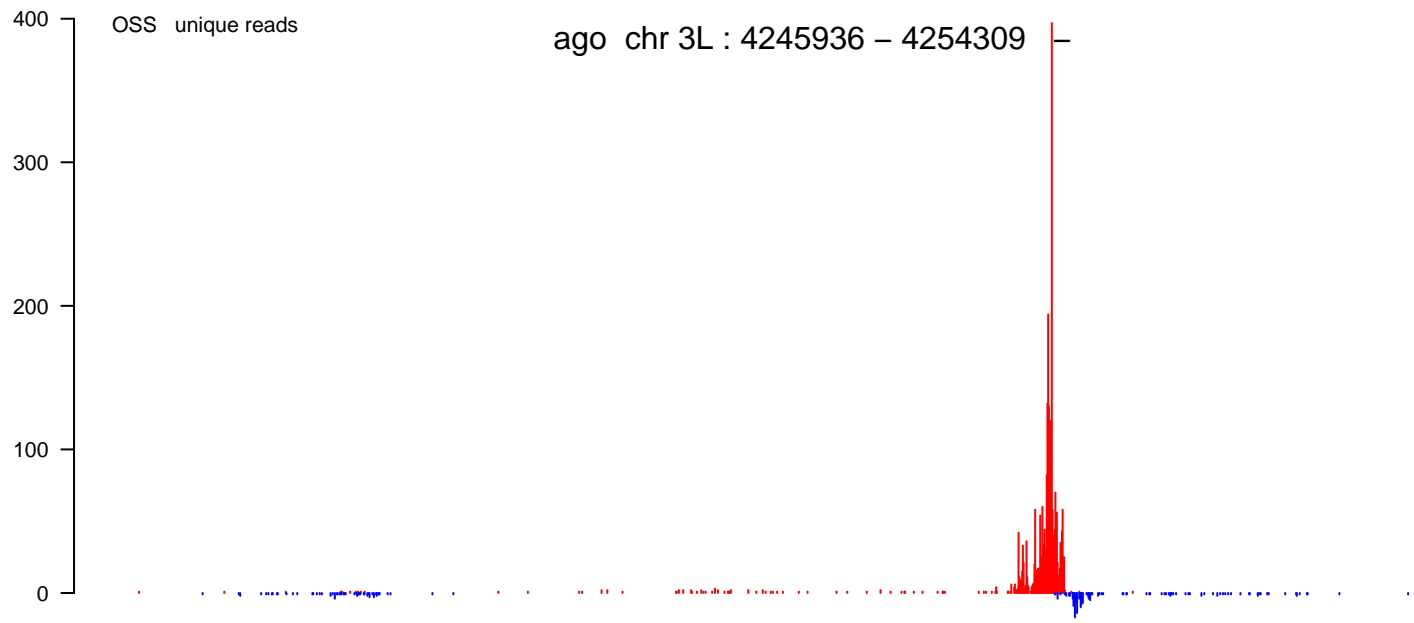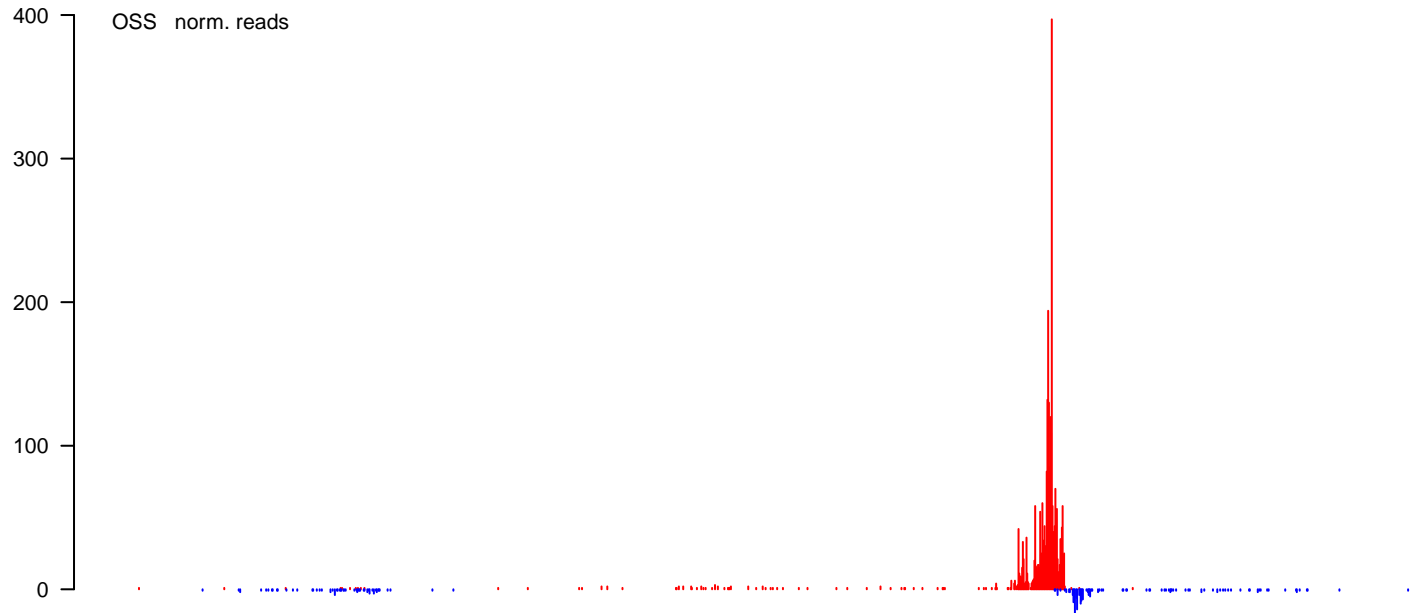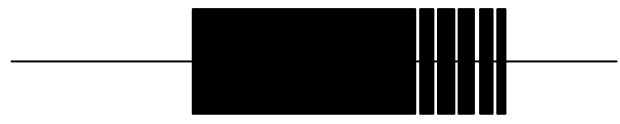

ago 3L – 4245936 4254309

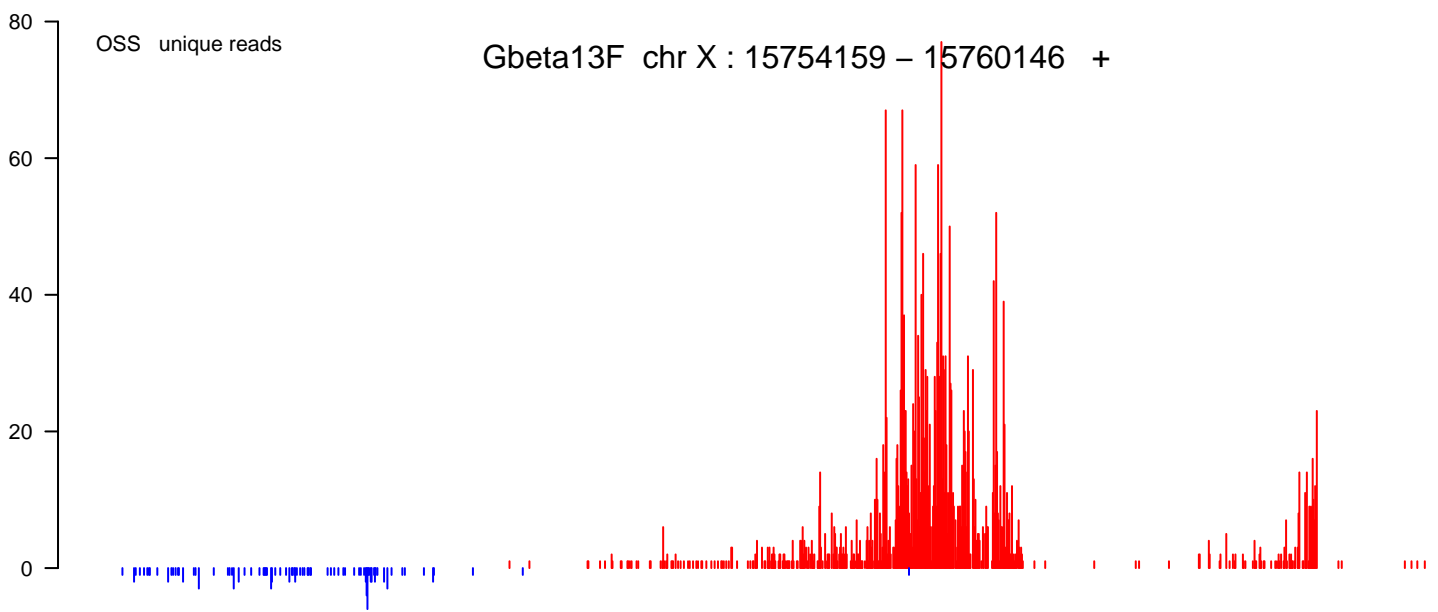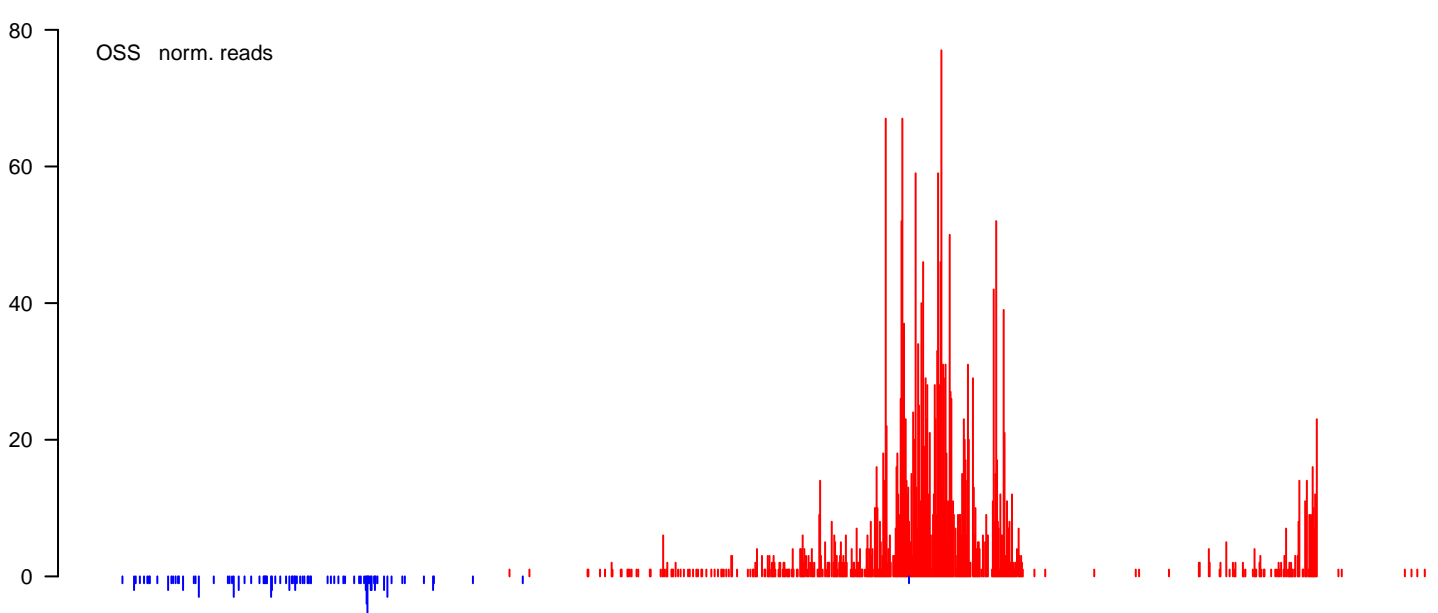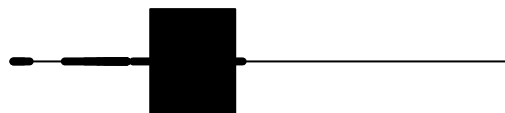

Gbeta13F X + 15754159 15760146

Rm62 chr 3R : 1826092 – 1834301

OSS unique reads

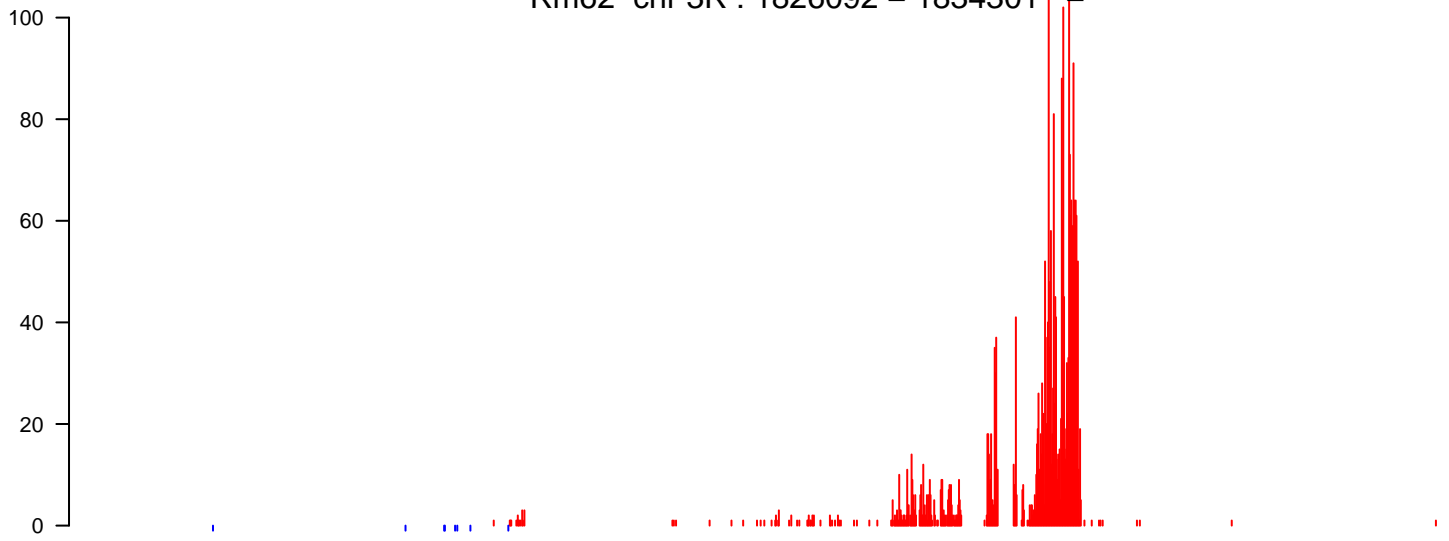

OSS norm. reads

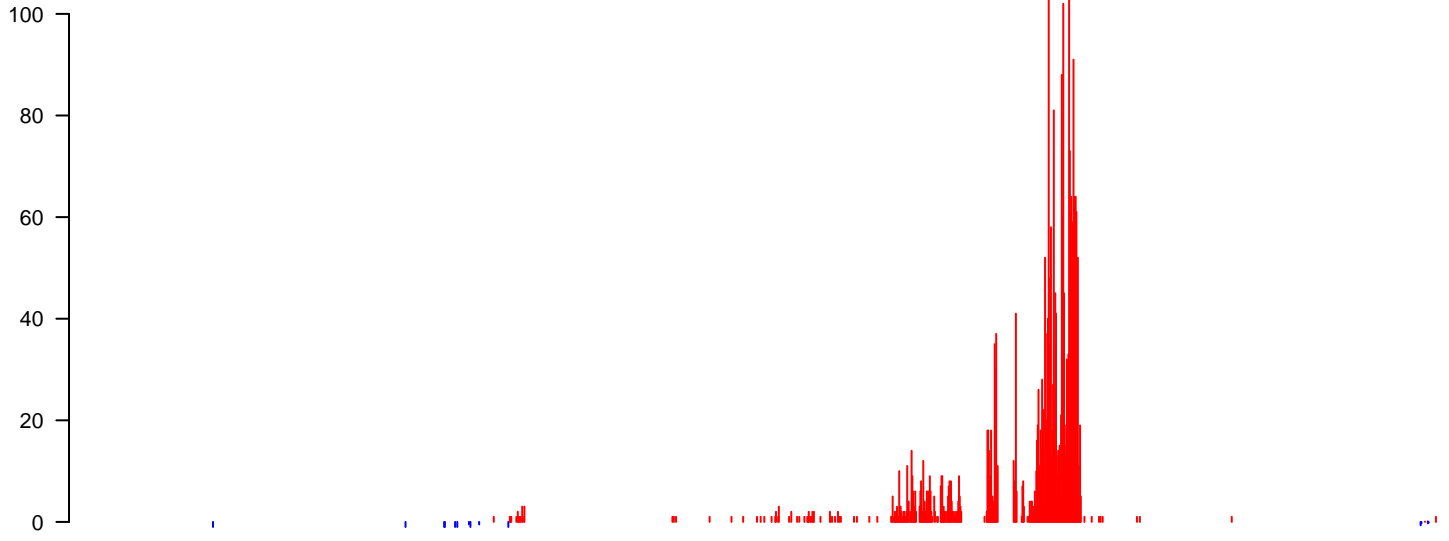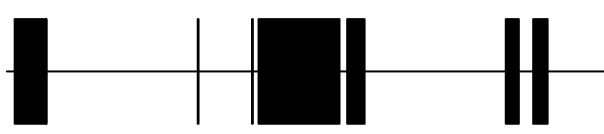



OSS unique reads

RhoGAP100F chr 3R : 27658599 – 27672318 +

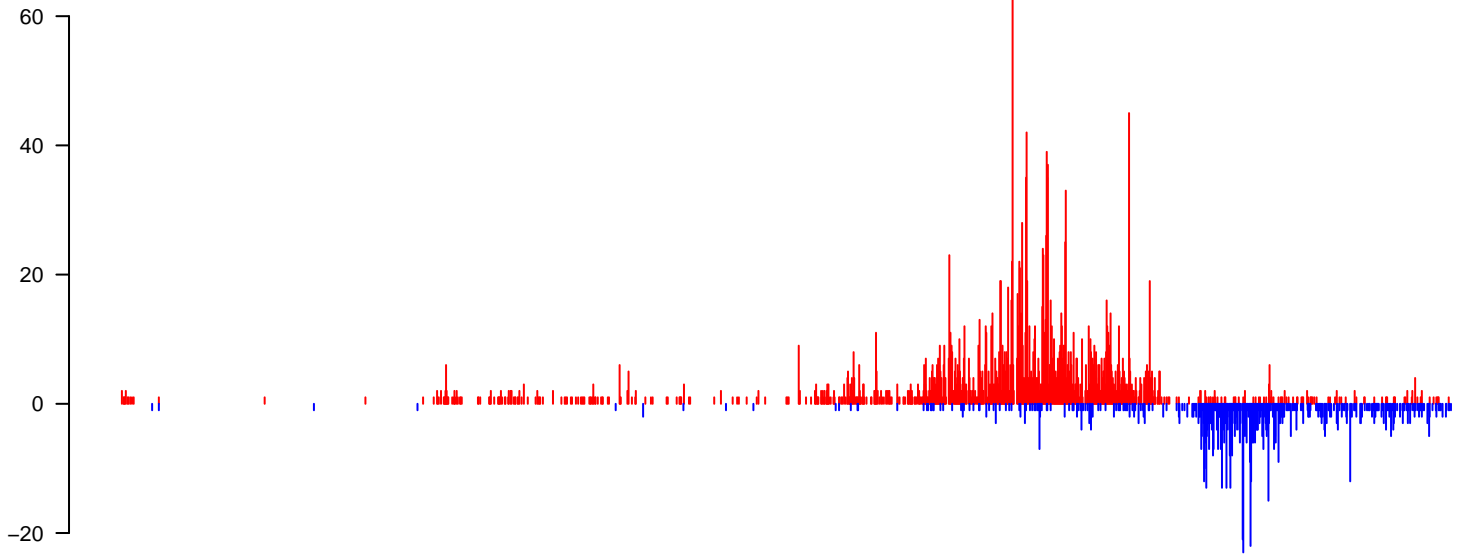

OSS norm. reads

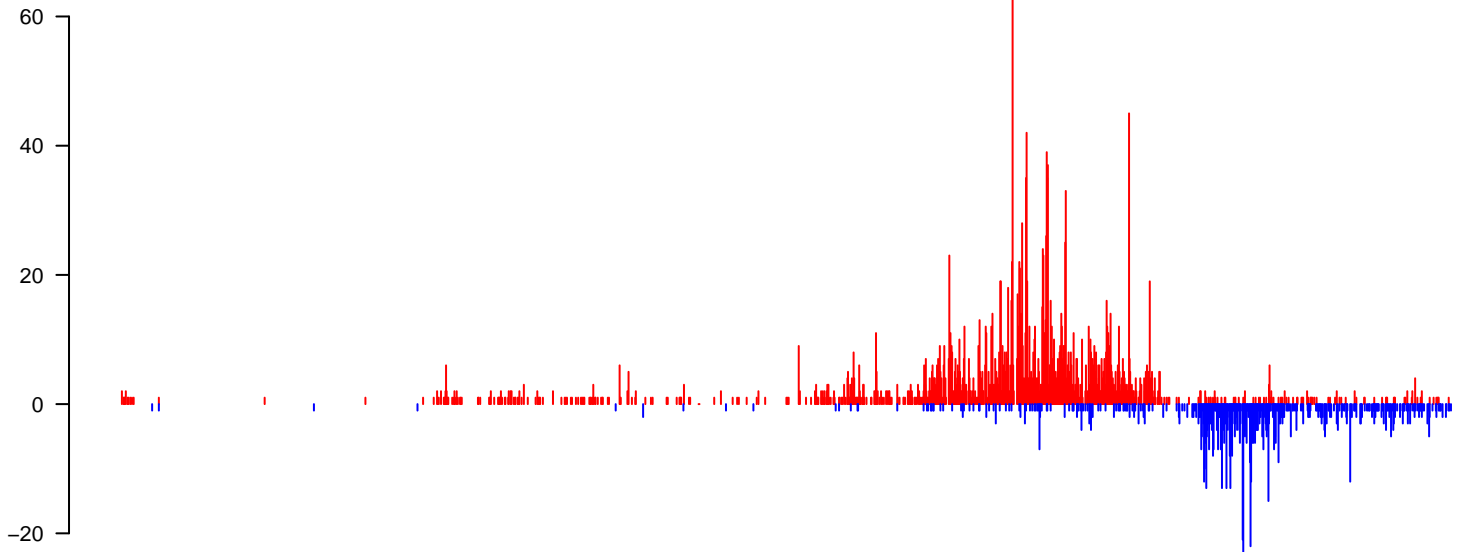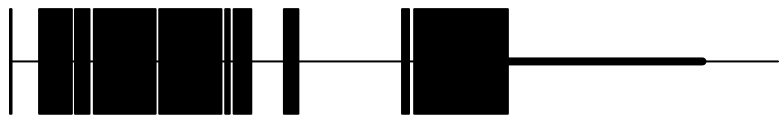

RhoGAP100F 3R + 27658599 27672318

OSS unique reads

CG17090 chr 3L : 543070 – 578048 +

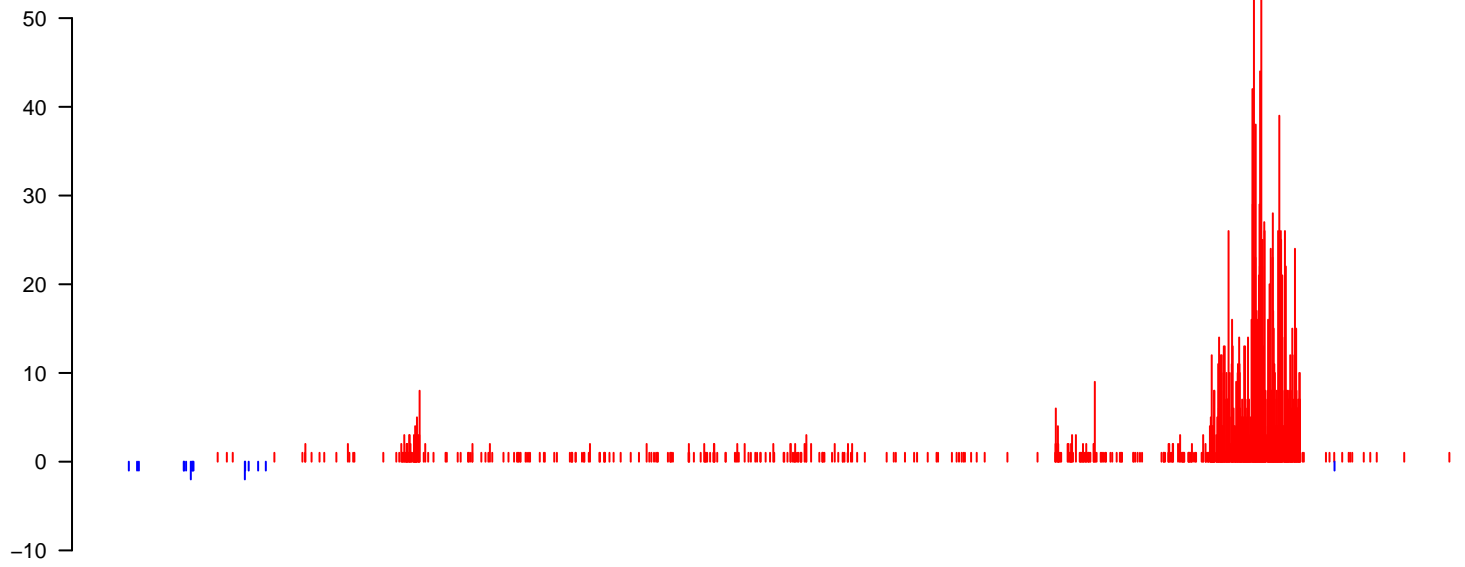

OSS norm. reads

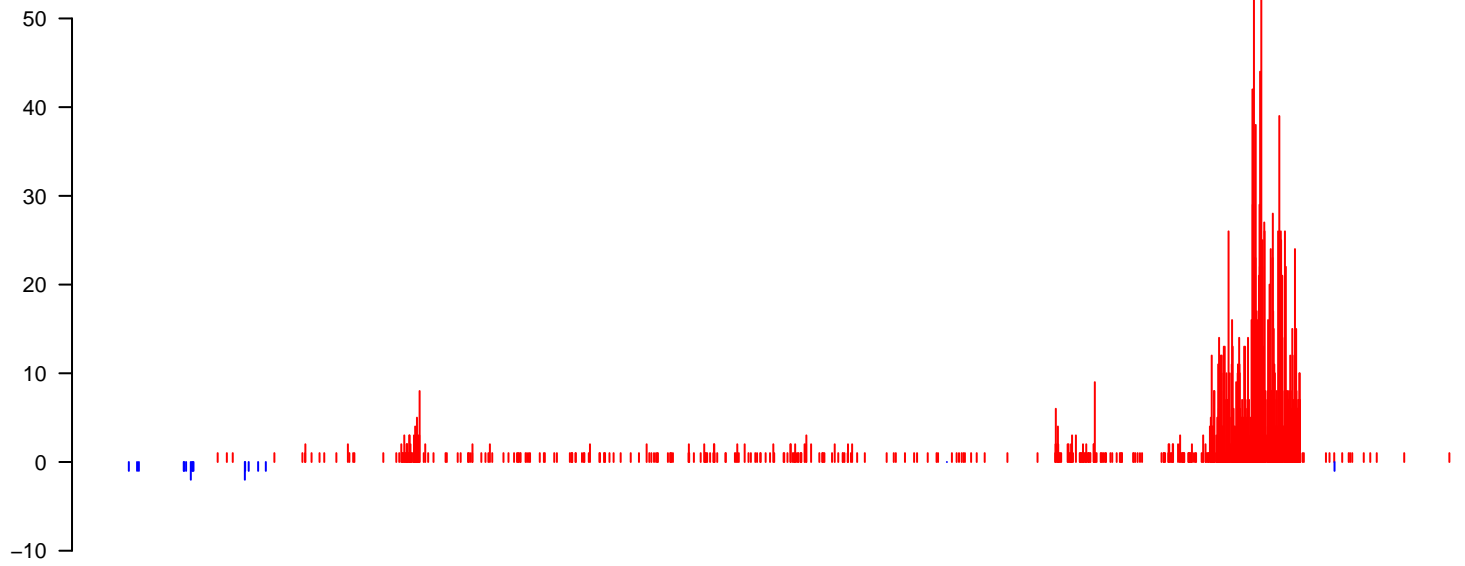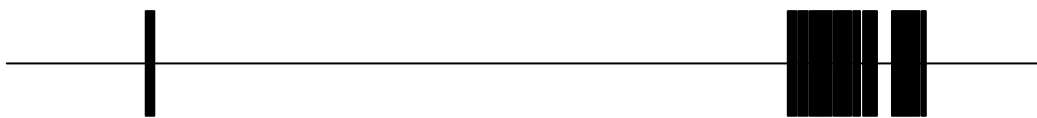

CG17090 3L + 543070 578048

OSS unique reads

drk chr 2R : 9382725 – 9390342 –

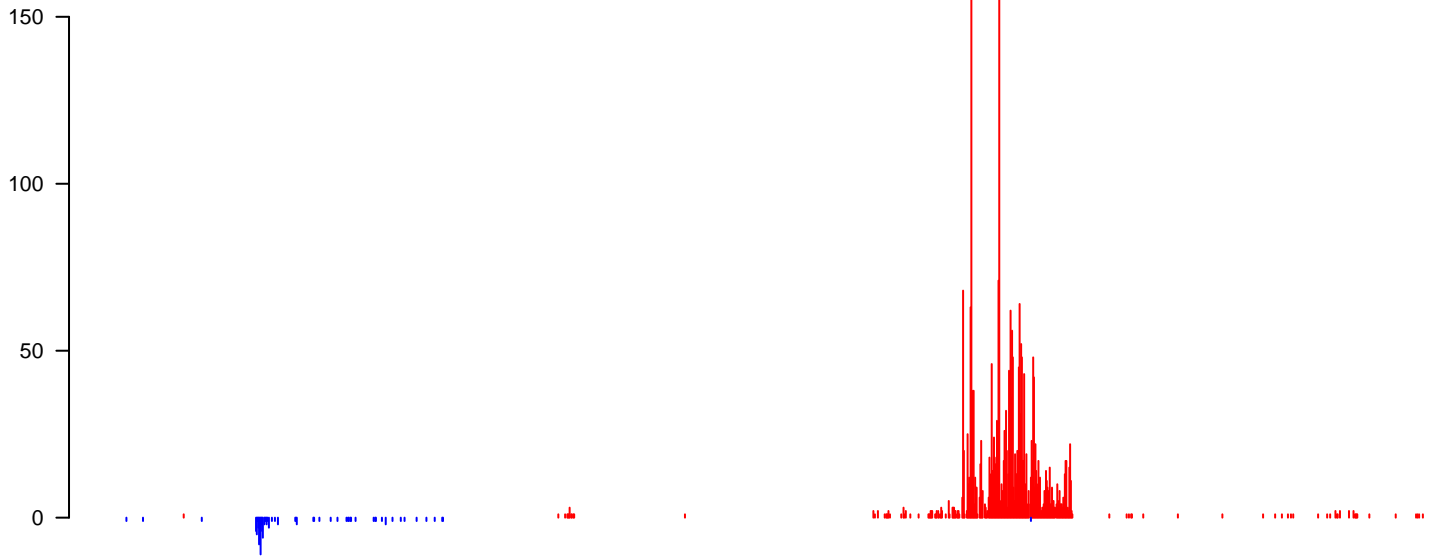

OSS norm. reads

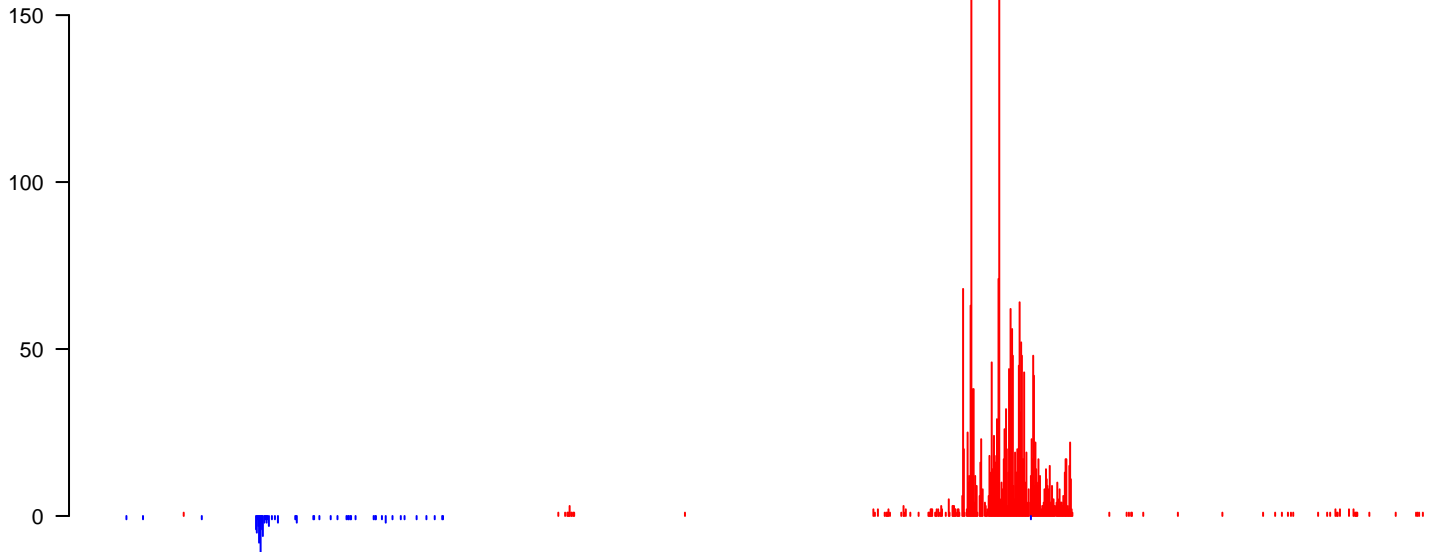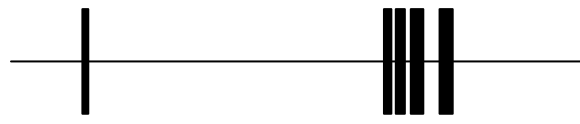

drk 2R – 9382725 9390342

OSS unique reads

CG11138 chr X : 12463217 – 12477215

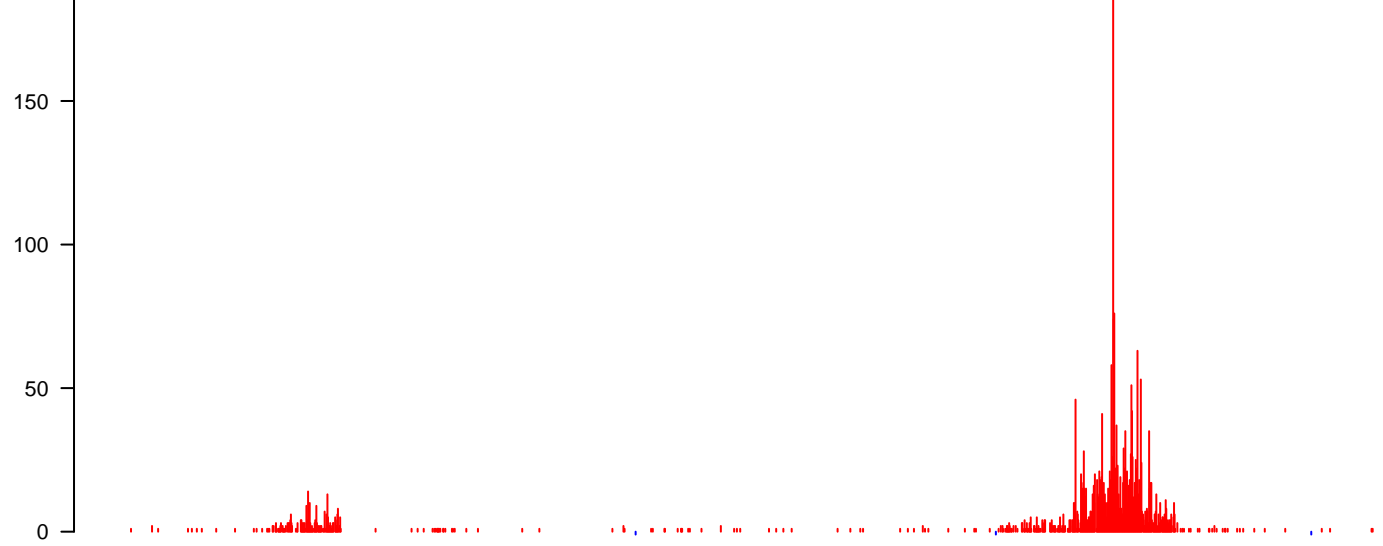

OSS norm. reads

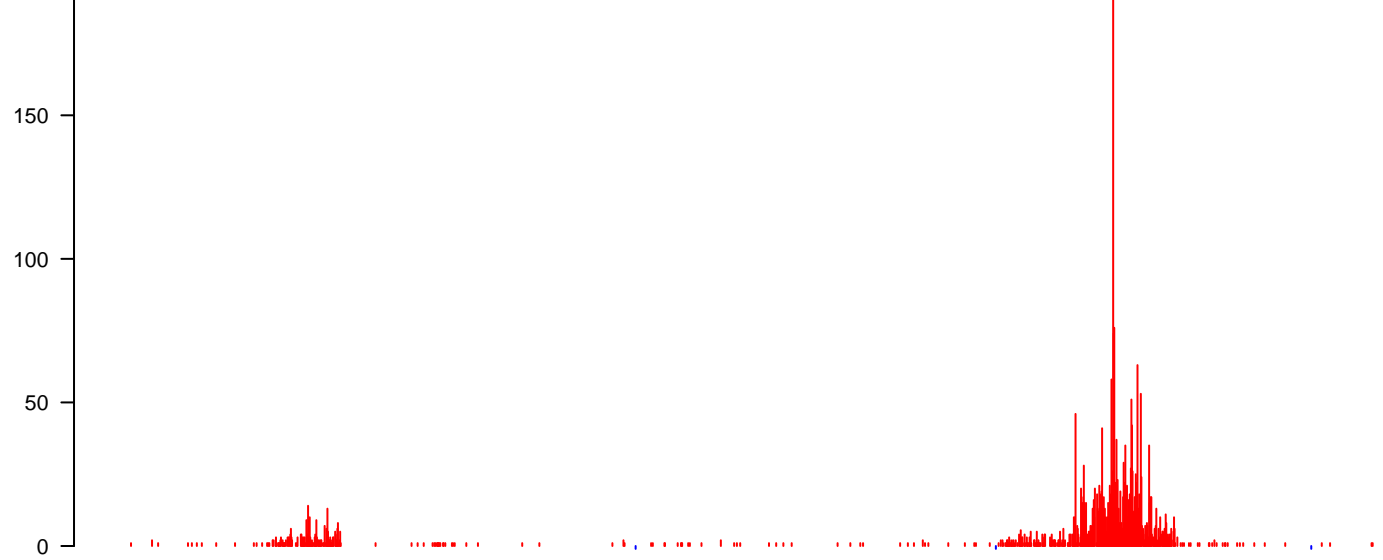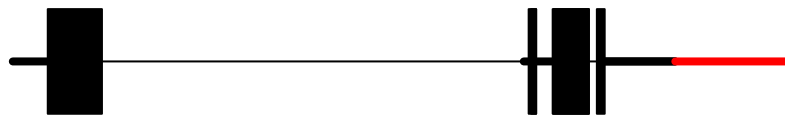

CG11138 X - 12463217 12477215

OSS unique reads

Eb1 chr 2R : 2636697 – 2643809 +

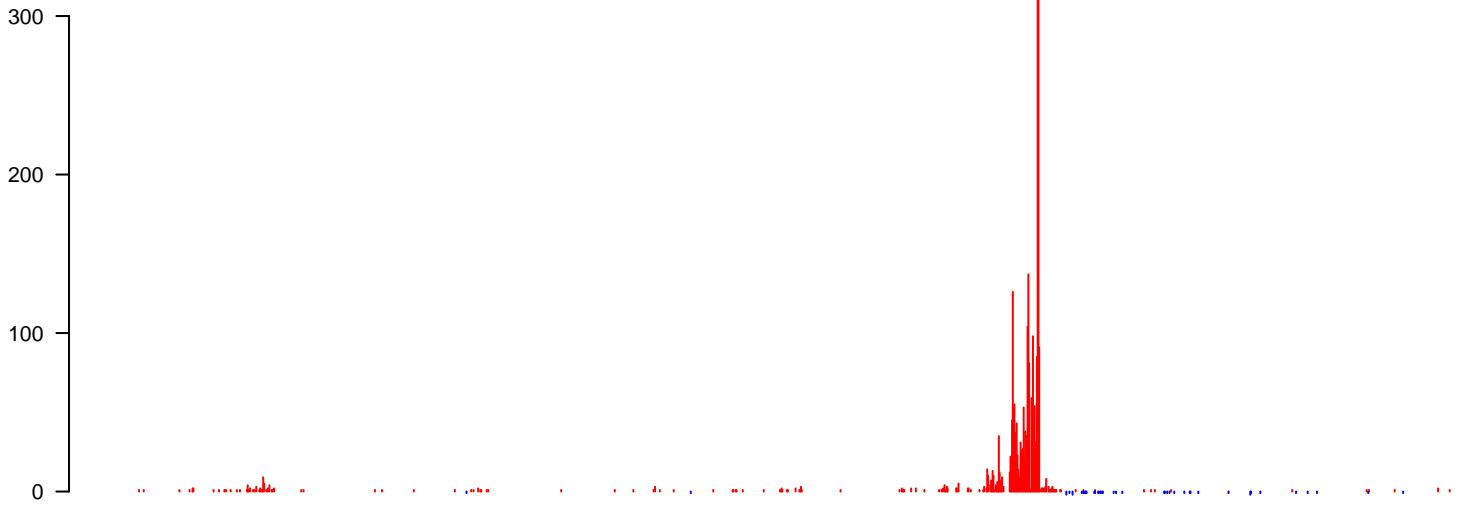

OSS norm. reads

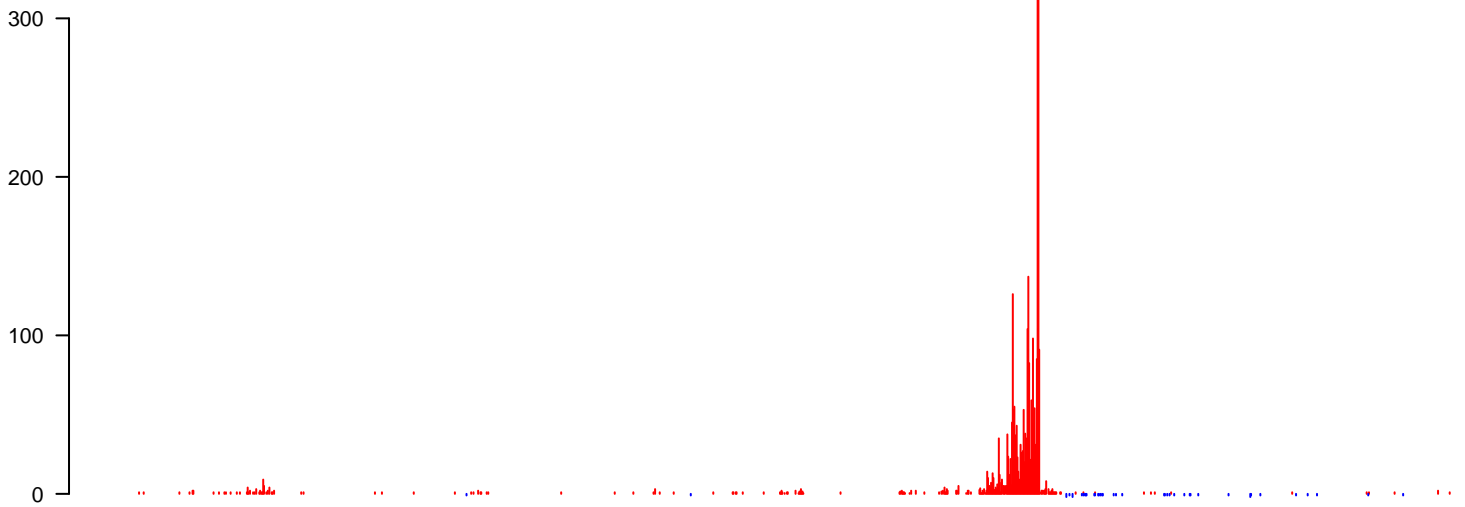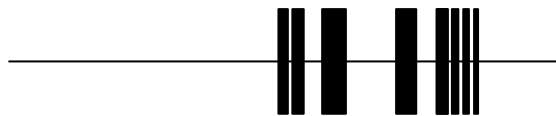

Eb1 2R + 2636697 2643809

OSS unique reads

CG10641 chr 2L : 18977508 – 18987276

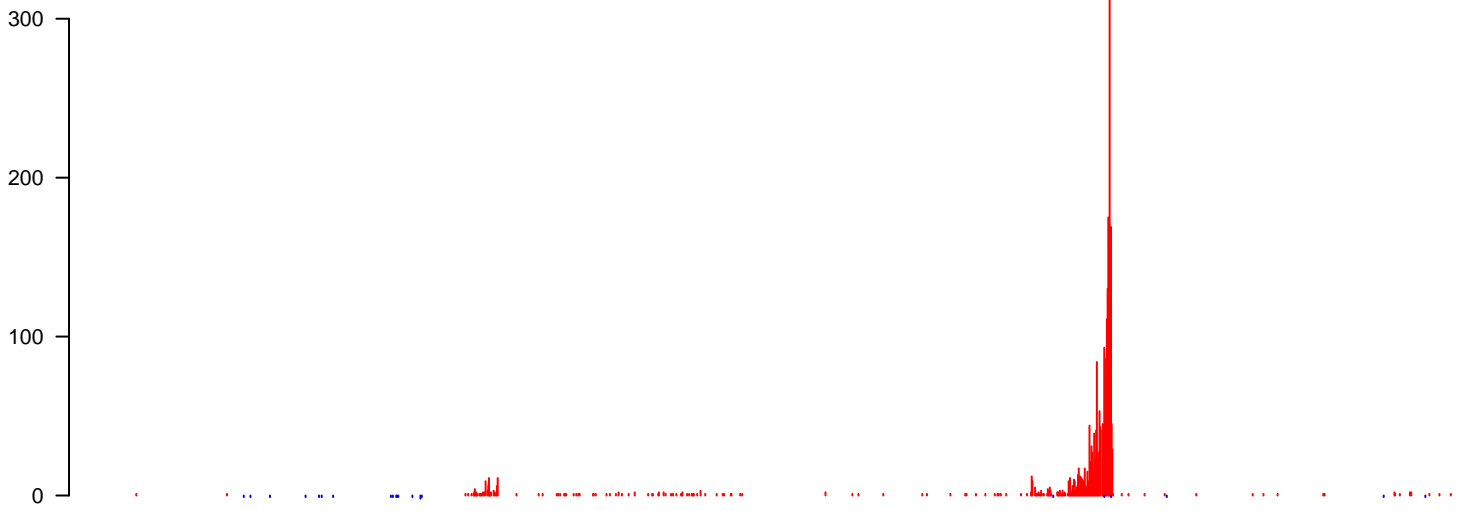

OSS norm. reads

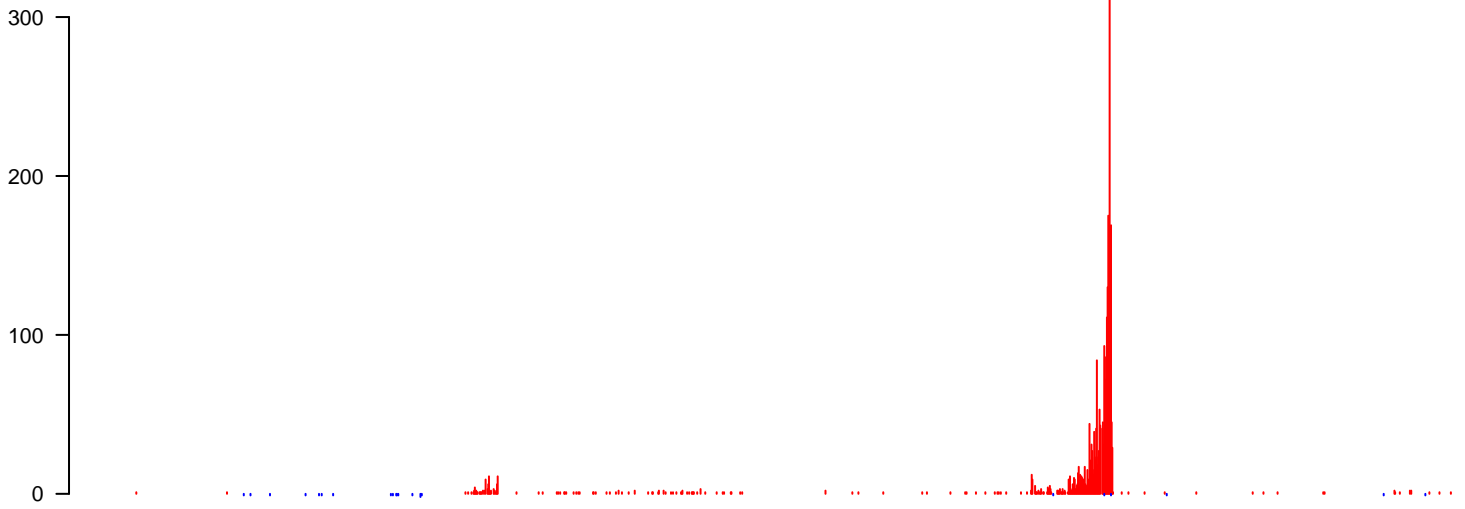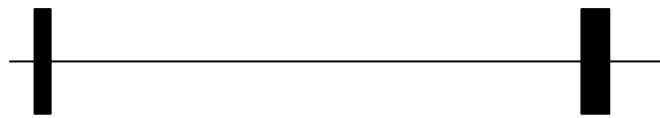

CG10641 2L – 18977508 18987276

OSS unique reads

crol chr 2L : 11794261 – 11809433

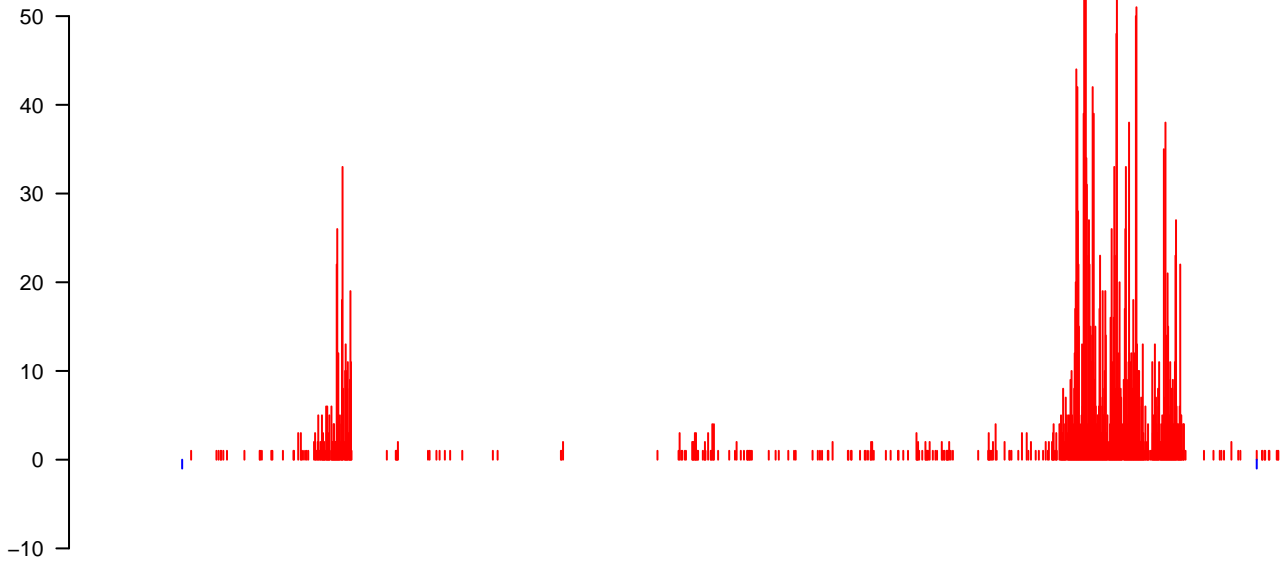

OSS norm. reads

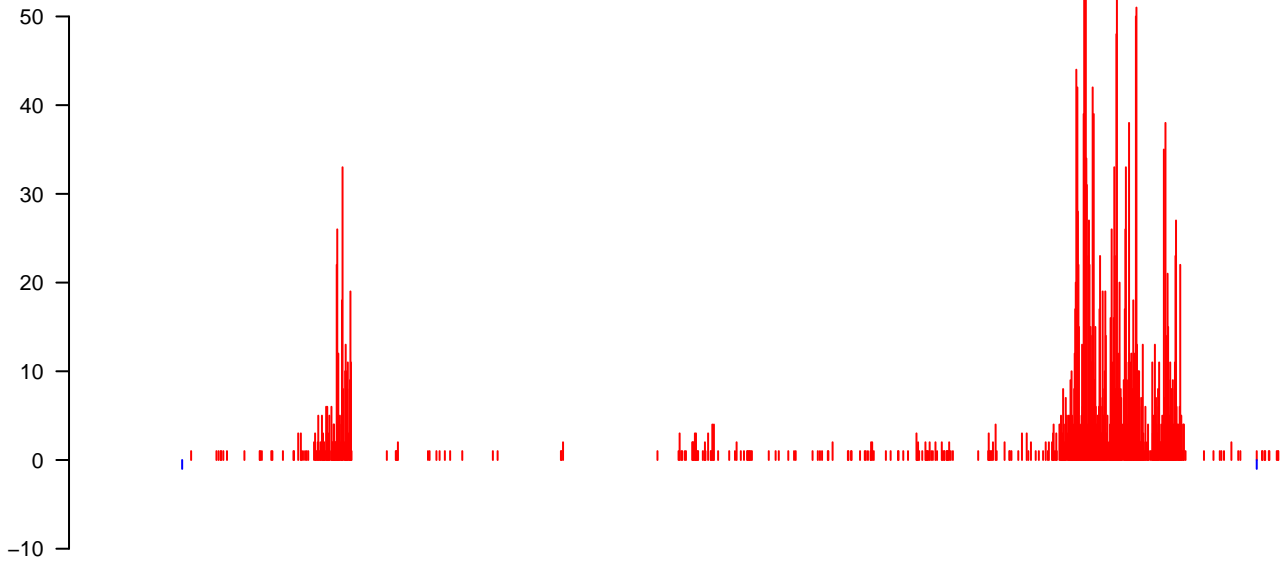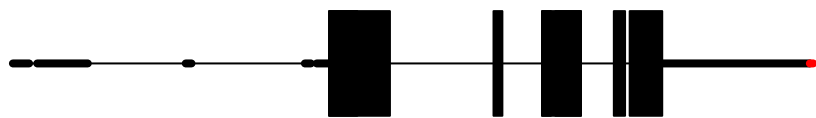

crol 2L – 11794261 11809433

ras chr X : 10638539 – 10643193 +

OSS unique reads

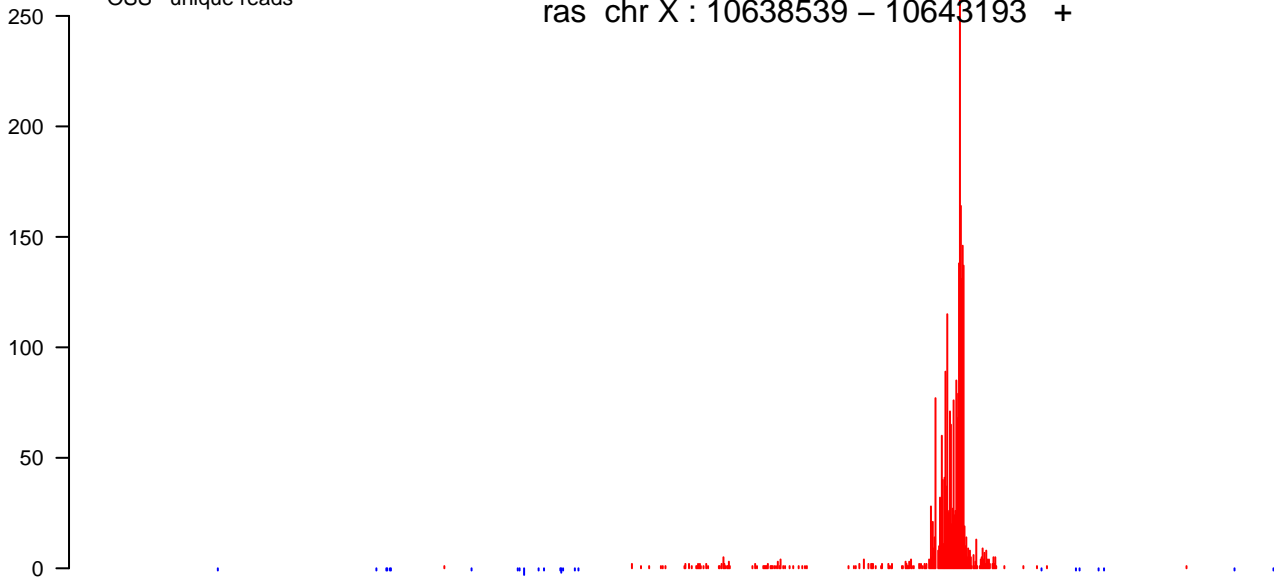

OSS norm. reads

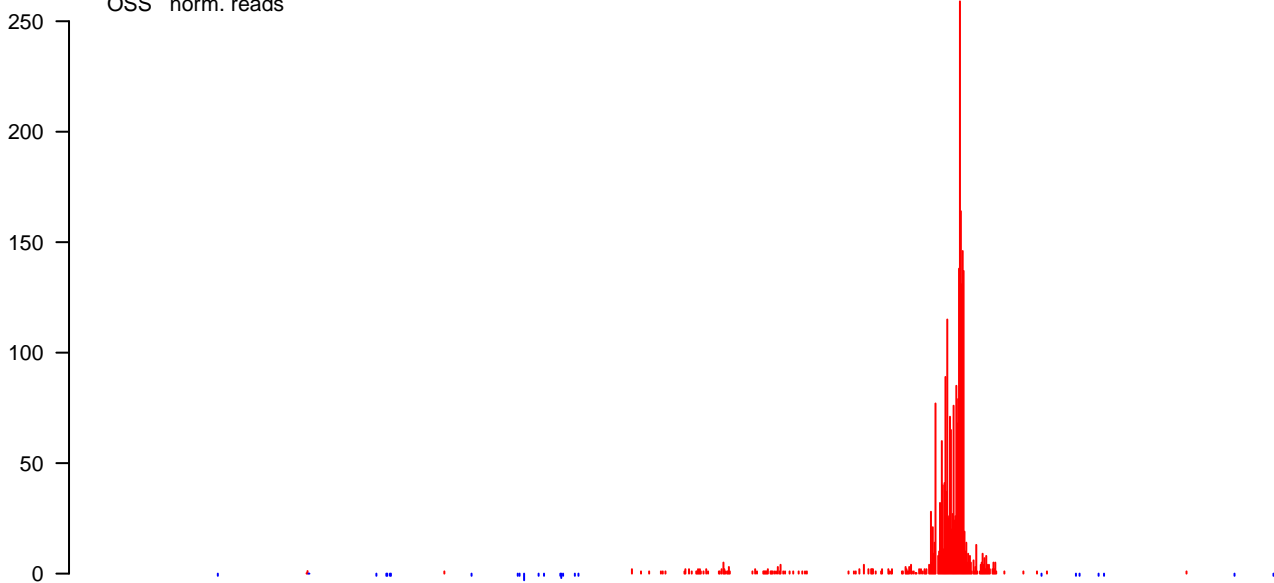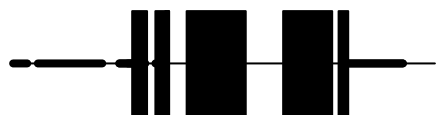

ras X + 10638539 10643193



I(3)L1231 chr 3R : 10468358 – 10481423

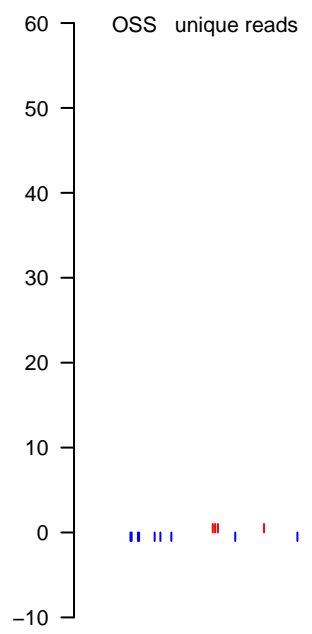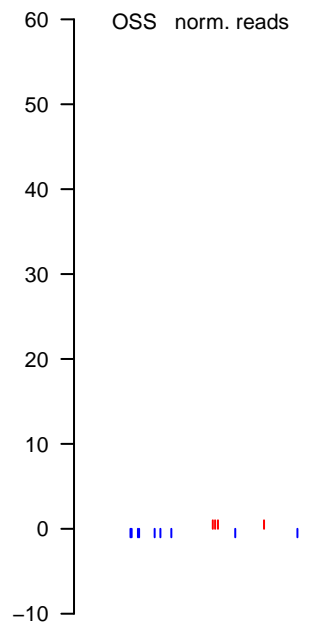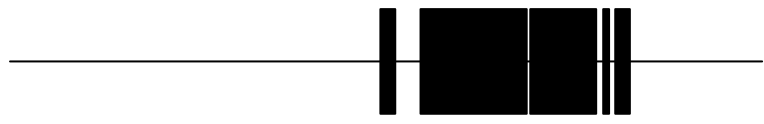

OSS unique reads

g chr X : 13620730 – 13630311

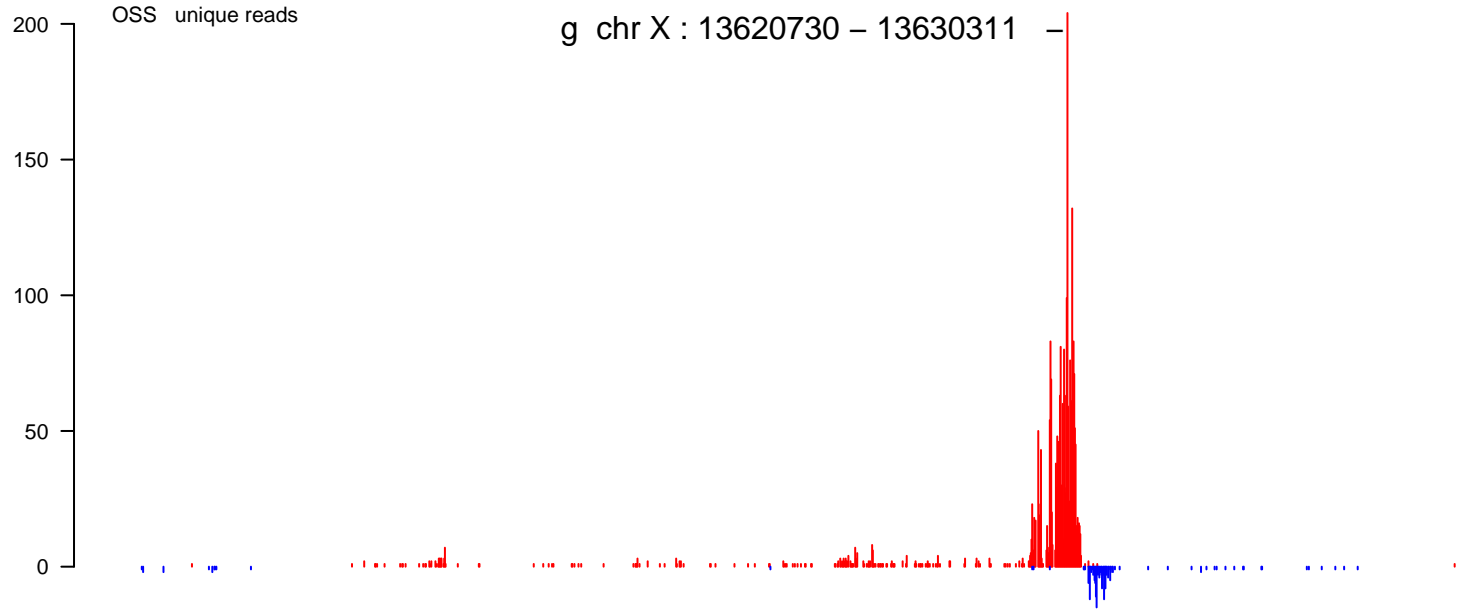

OSS norm. reads

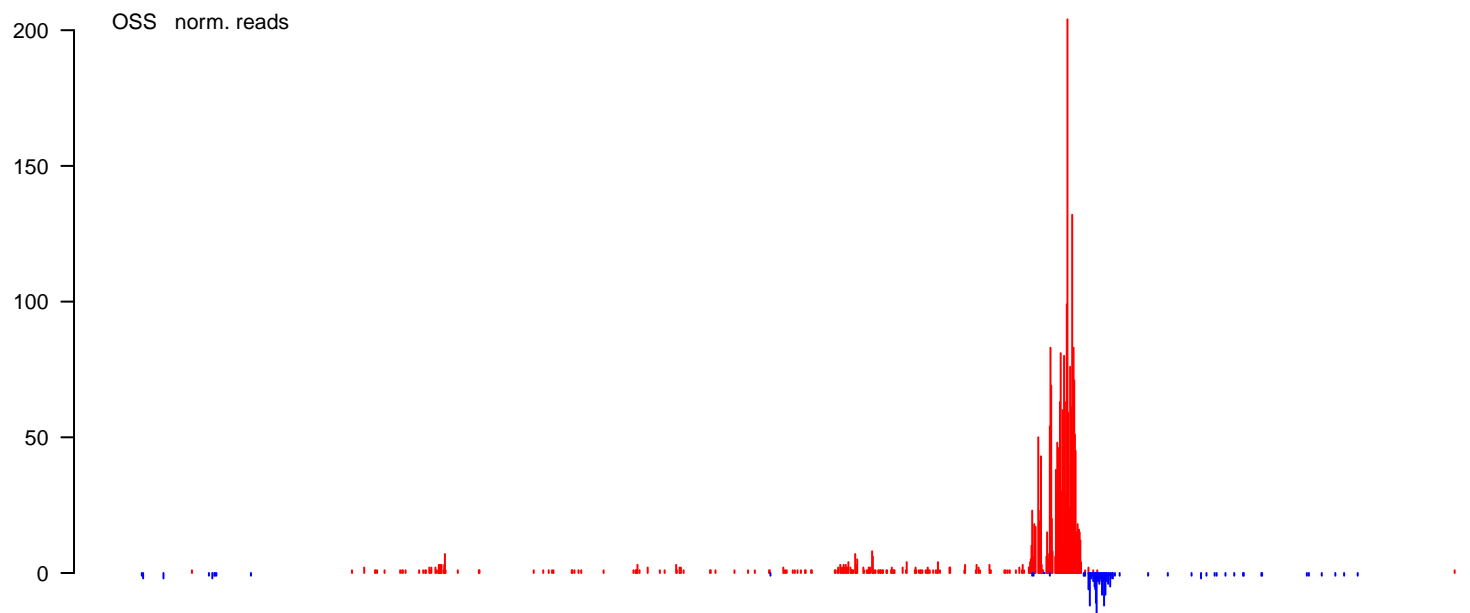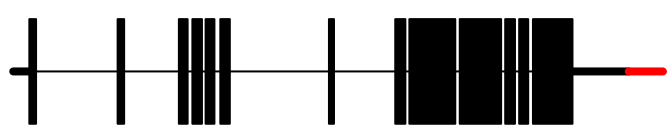

g X – 13620730 13630311

path chr 3L : 9487610 – 9498429

OSS unique reads

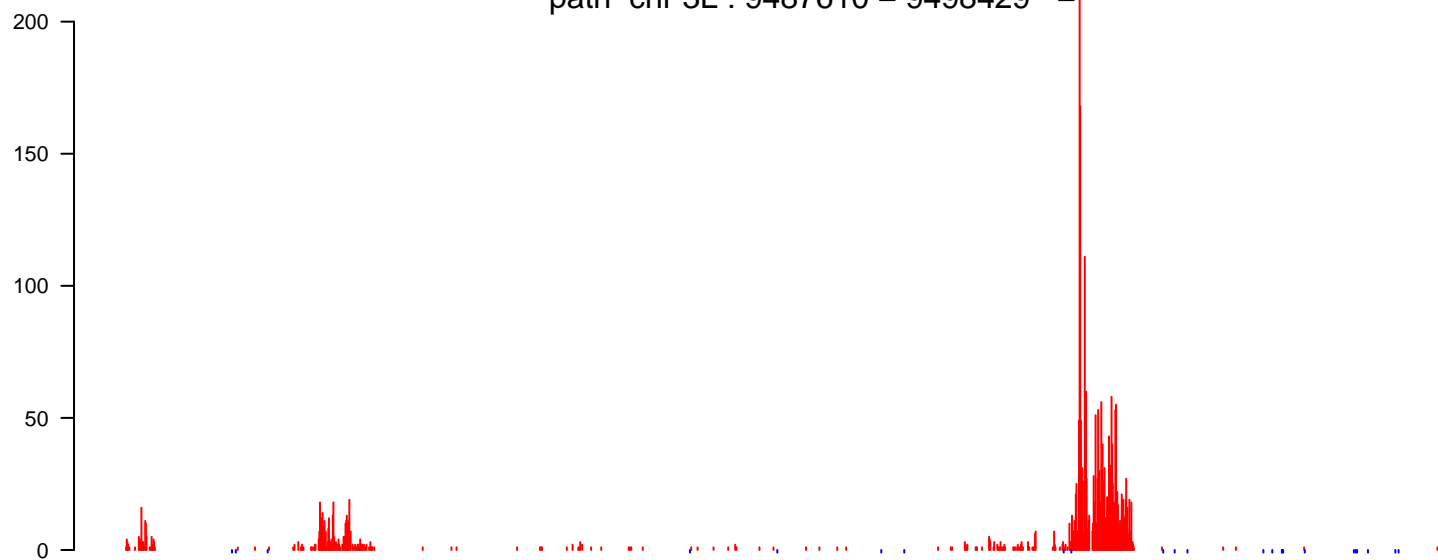

OSS norm. reads

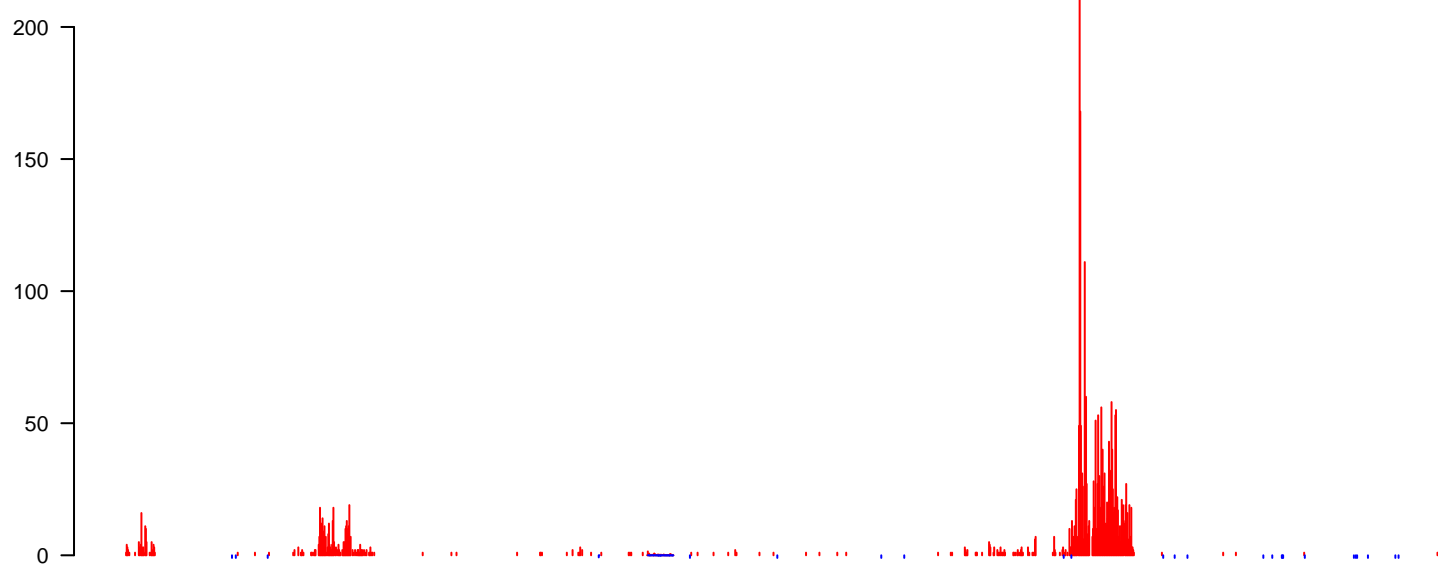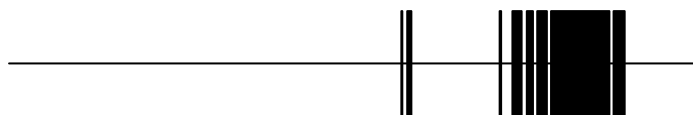

path 3L – 9487610 9498429

OSS unique reads

cdi chr 3R : 14870604 – 14920076 –

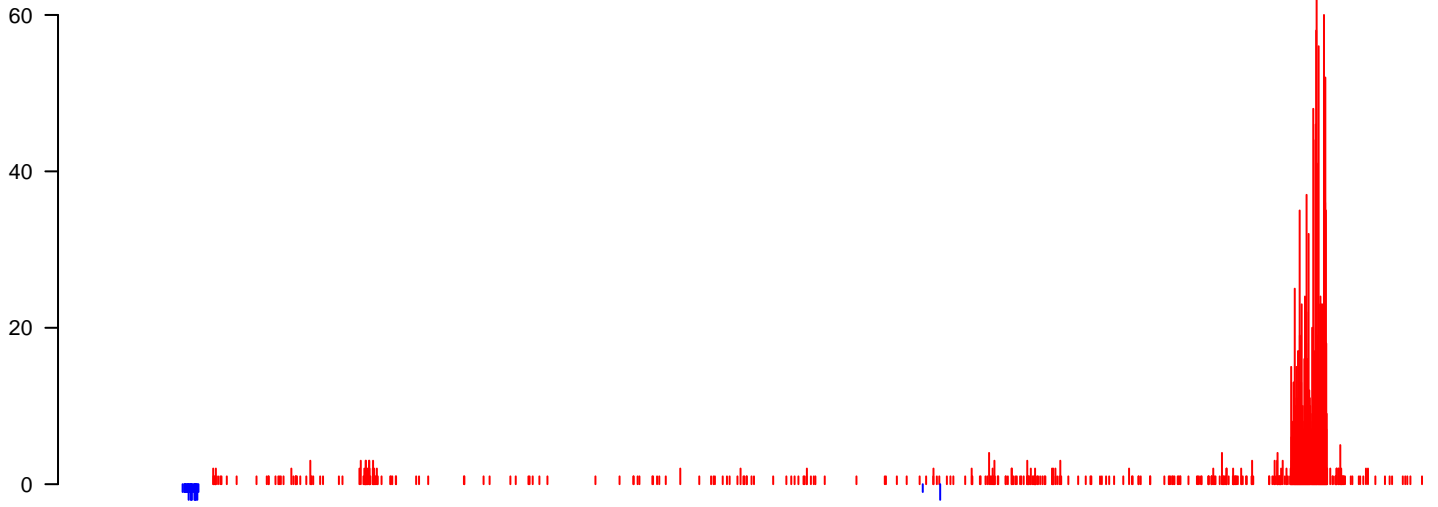

OSS norm. reads

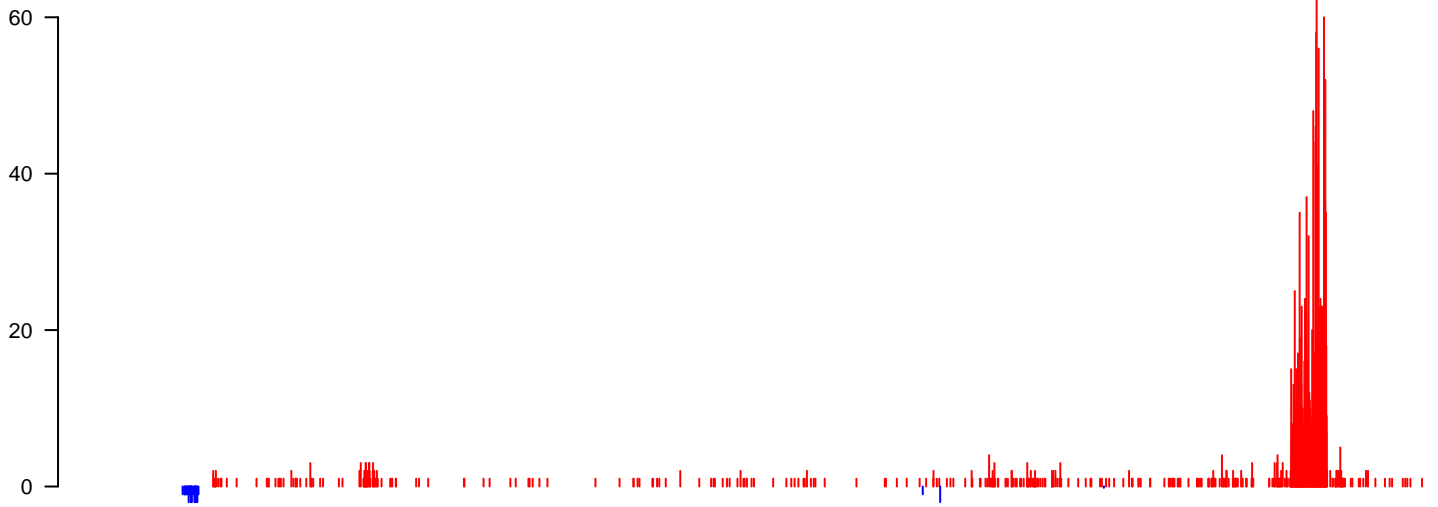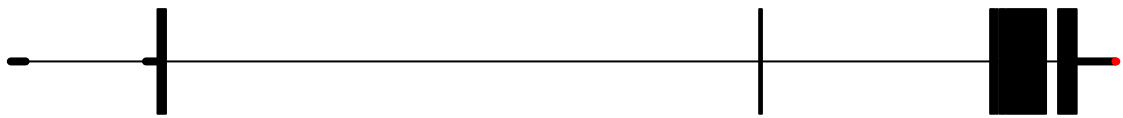

cdi 3R – 14870604 14920076

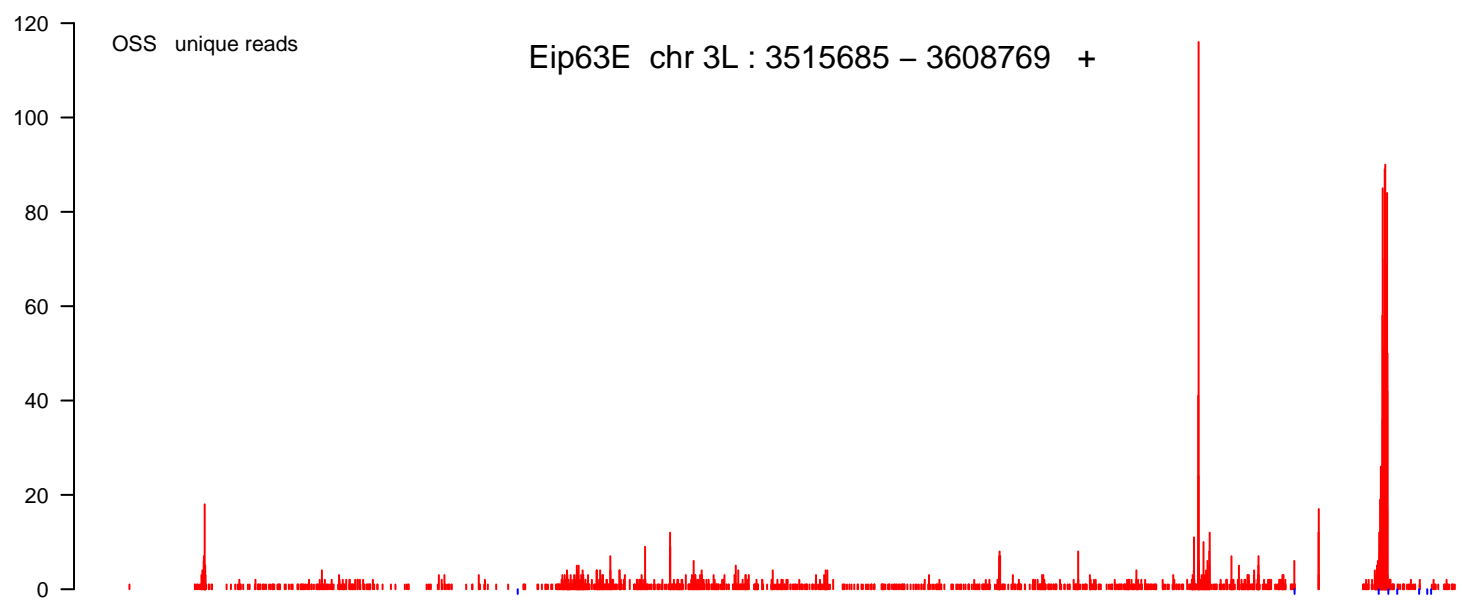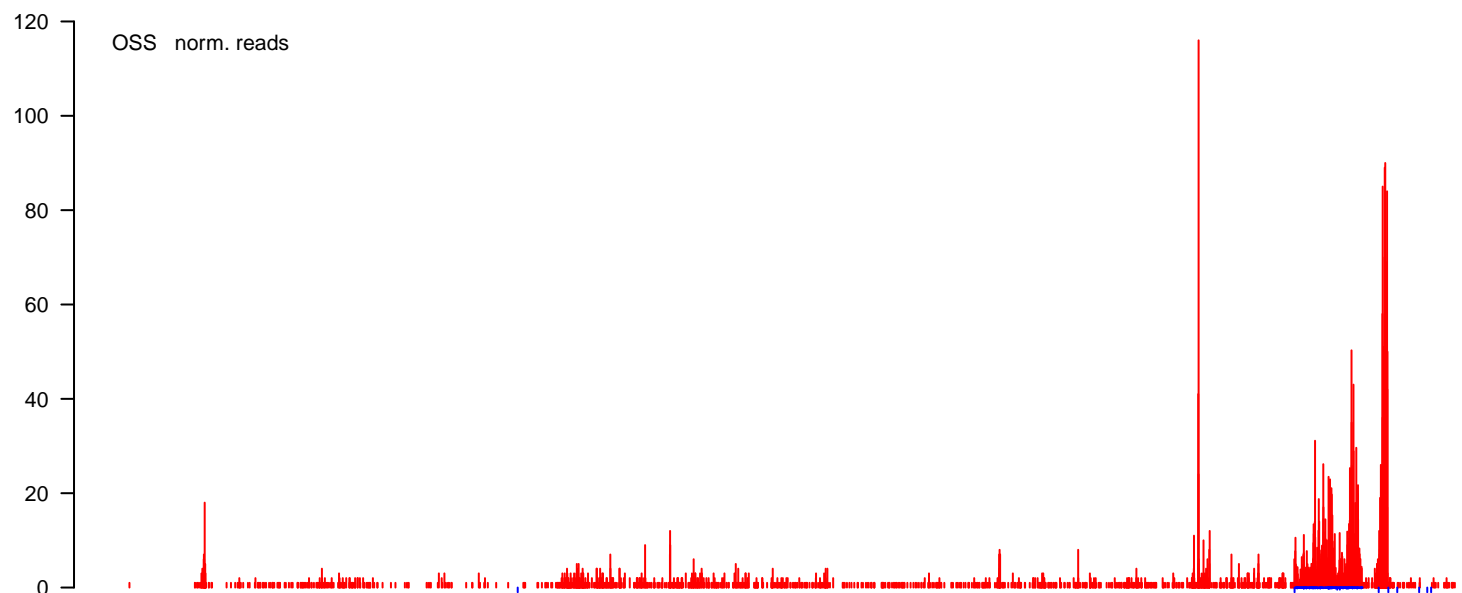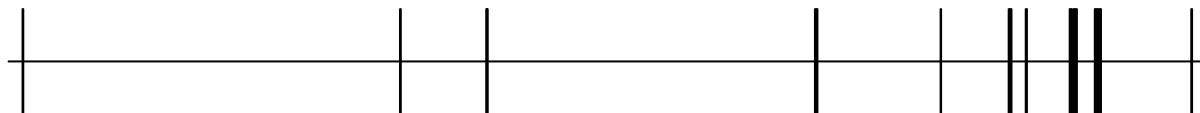

OSS unique reads

CG18446 chr 2R : 5758977 – 5761204 +

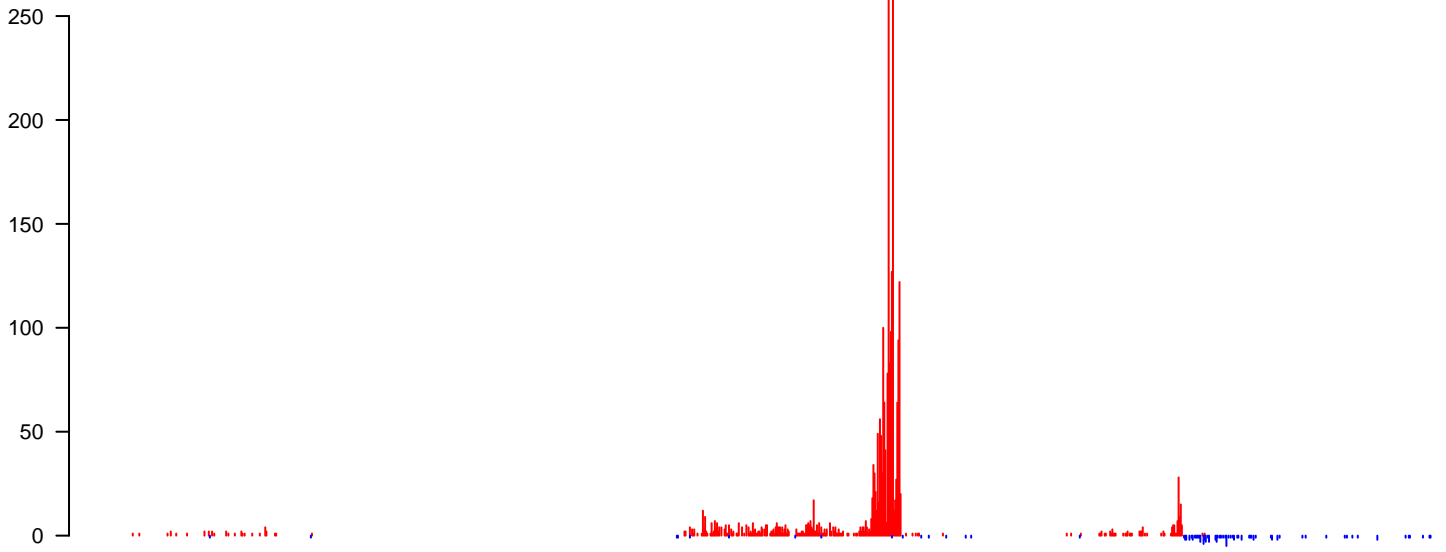

OSS norm. reads

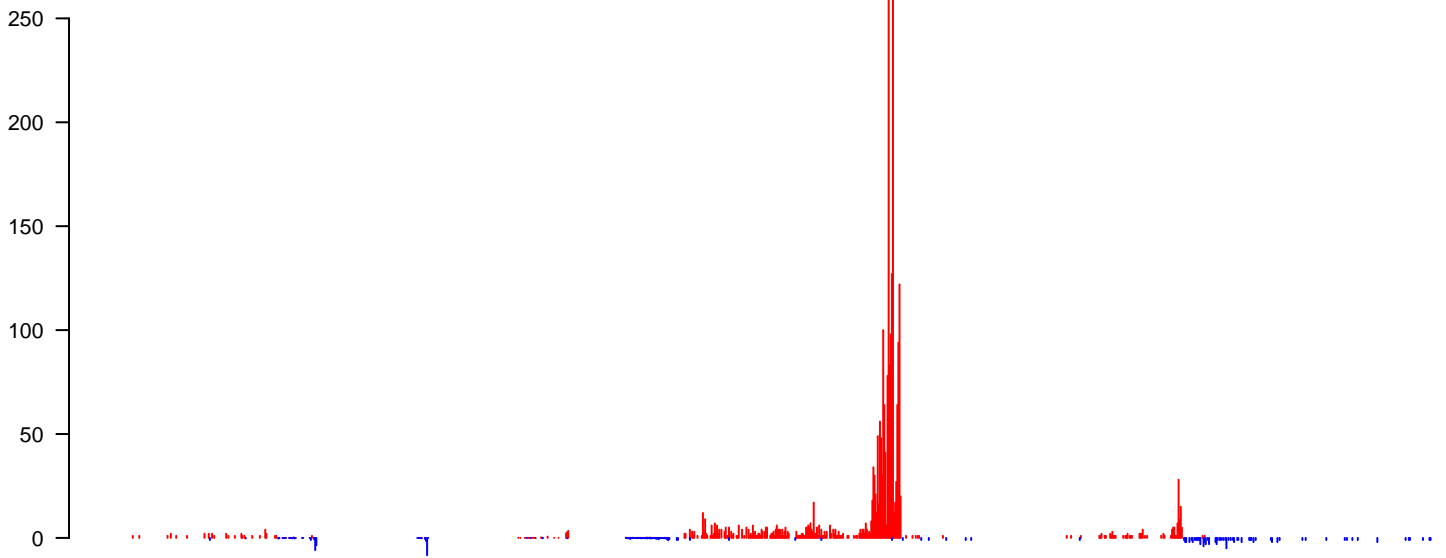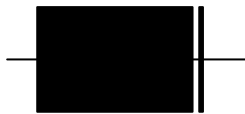

CG18446 2R + 5758977 5761204

Chd64 chr 3L : 4114213 – 4122423

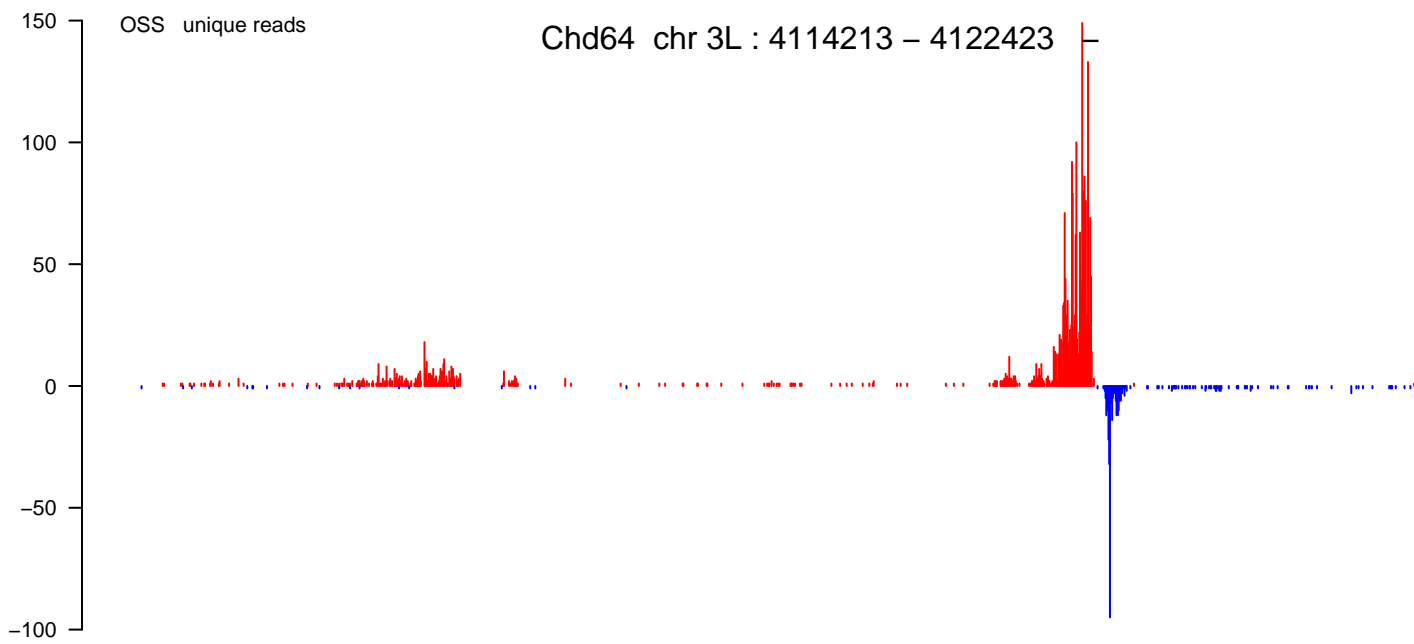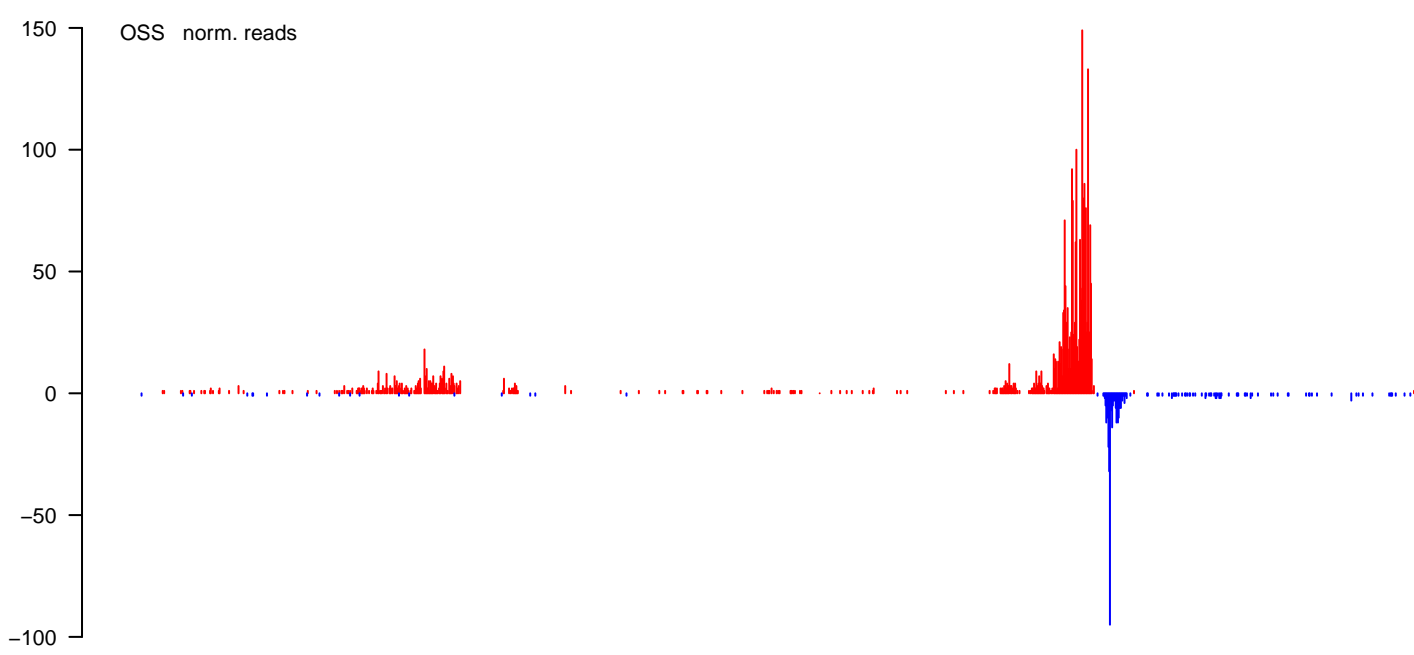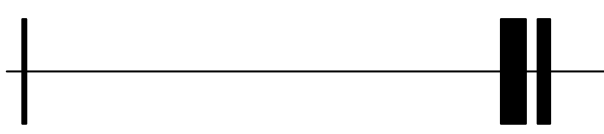

CG9940 chr X : 13577871 – 13612316 –

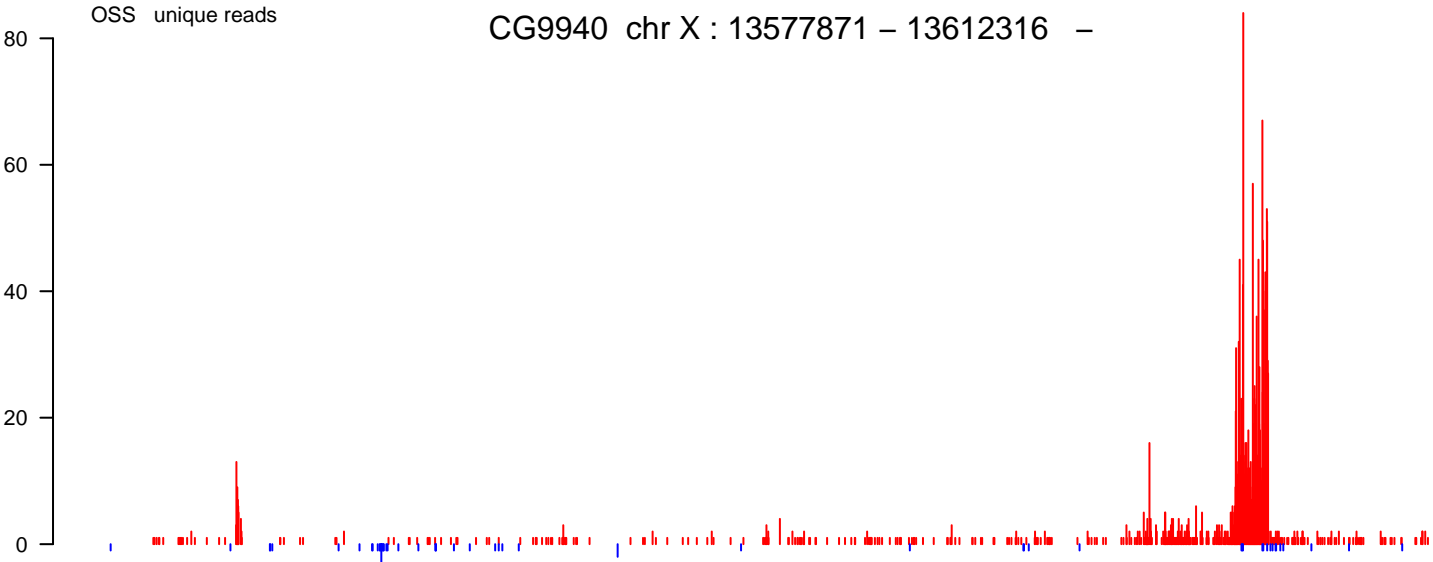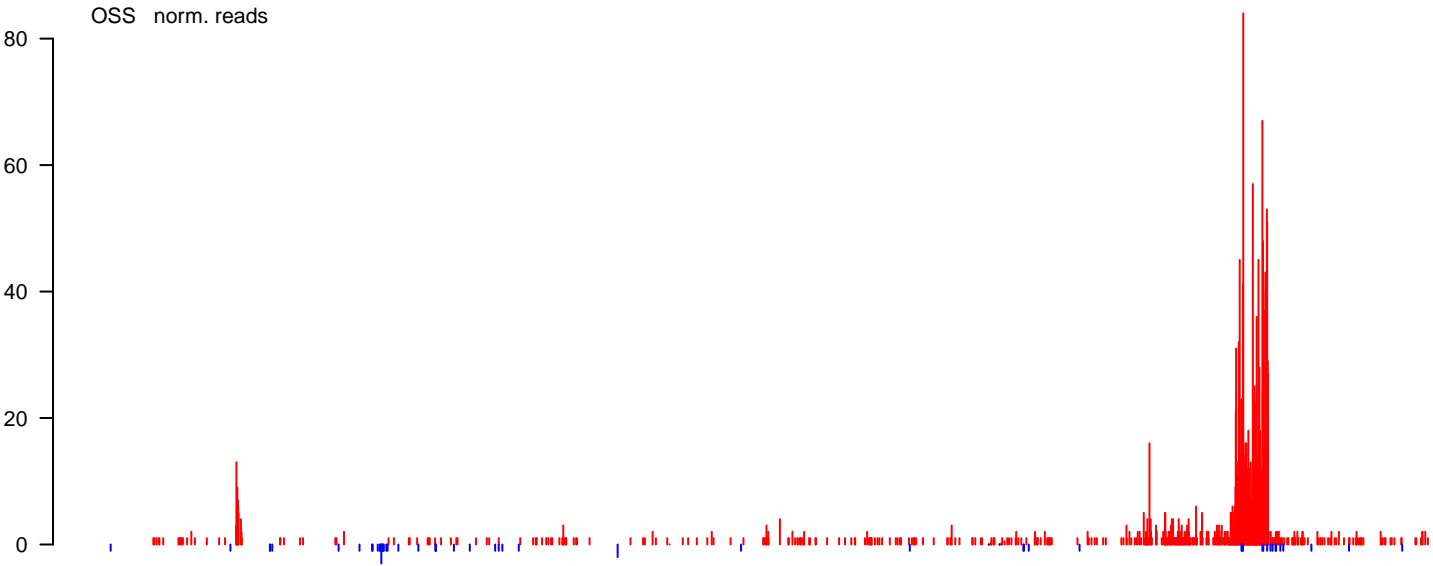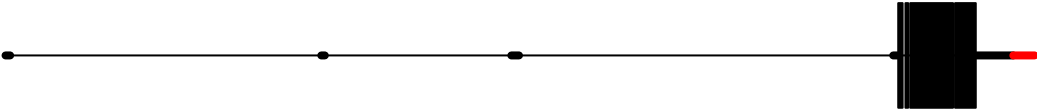



msi chr 3R : 21344045 – 21431252 +

OSS unique reads

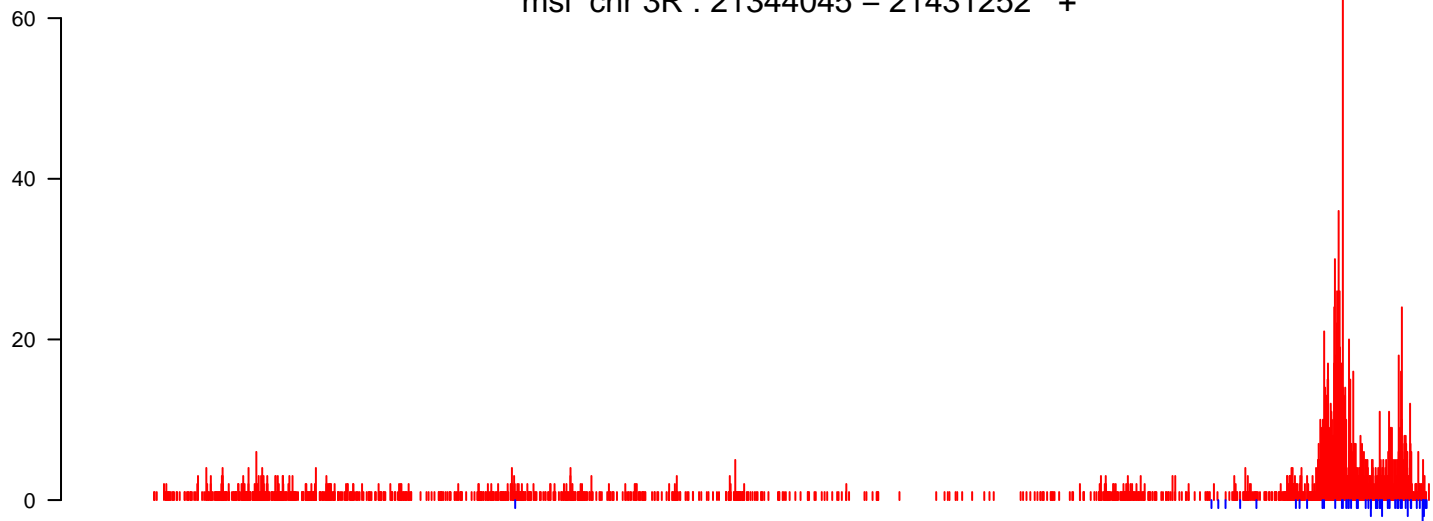

OSS norm. reads

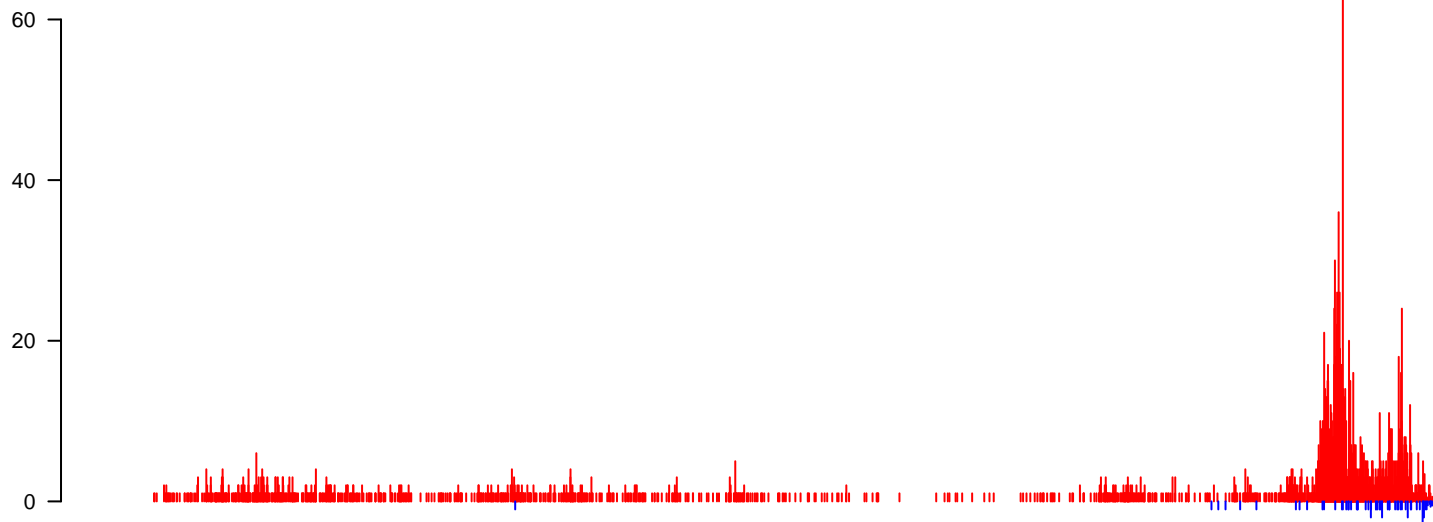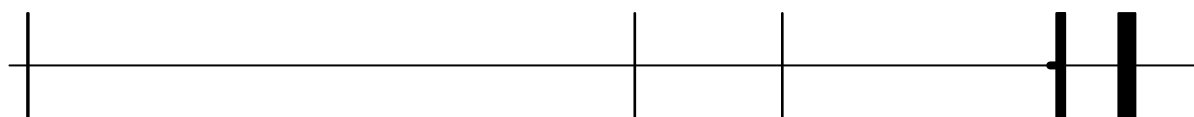

OSS unique reads

desat1 chr 3R : 8265322 – 8273340 +

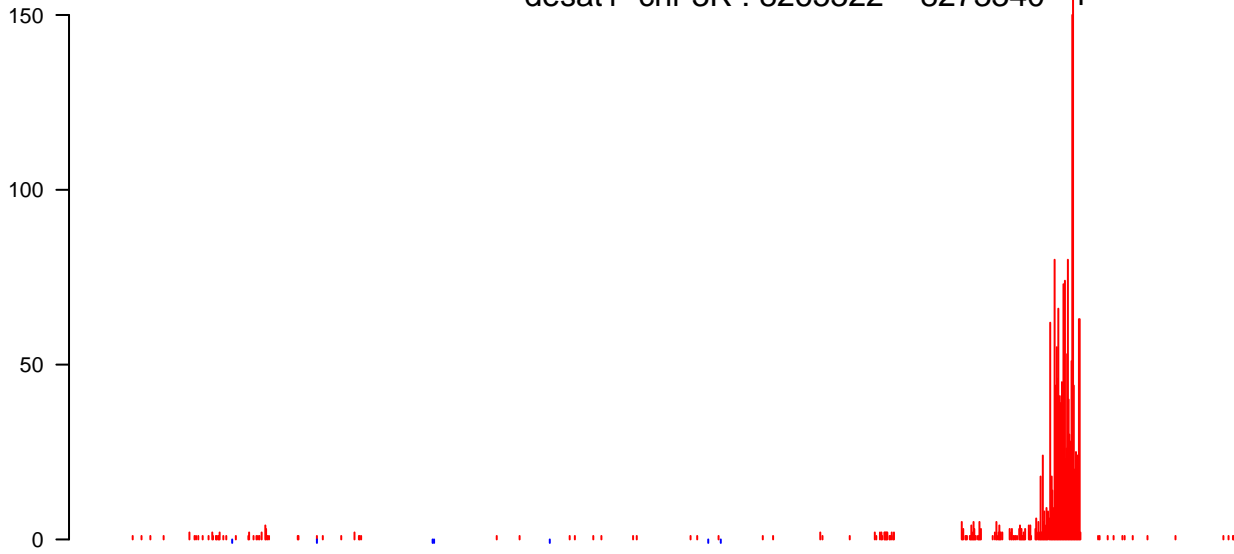

OSS norm. reads

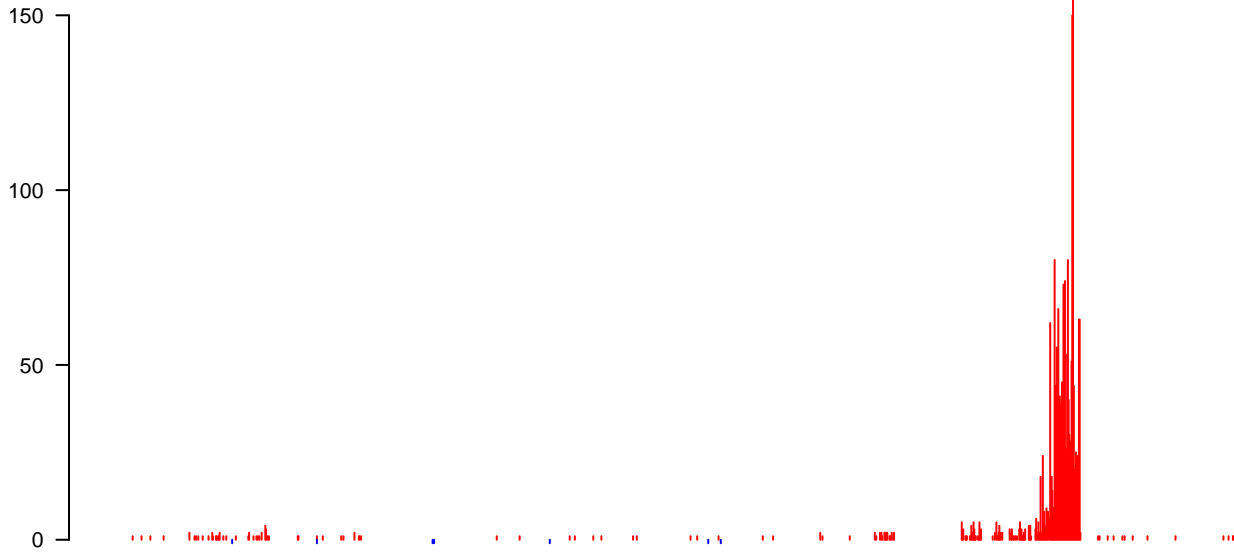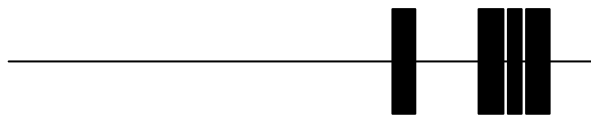

desat1 3R + 8265322 8273340

OSS unique reads

CG3638 chr X : 11111111 – 1130666 –

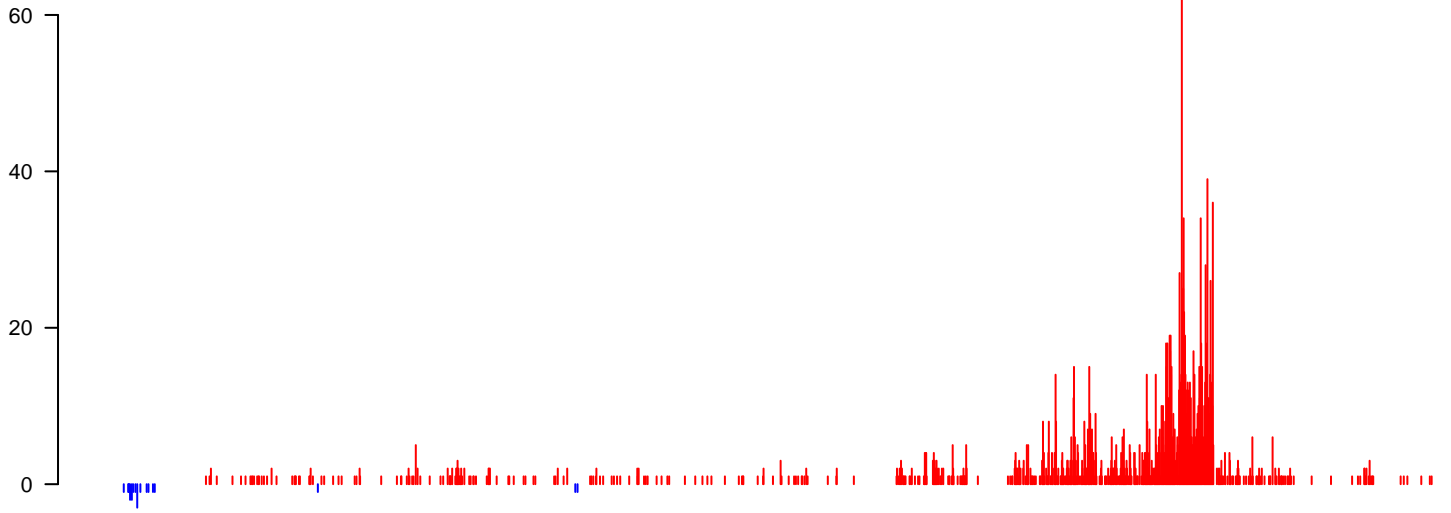

OSS norm. reads

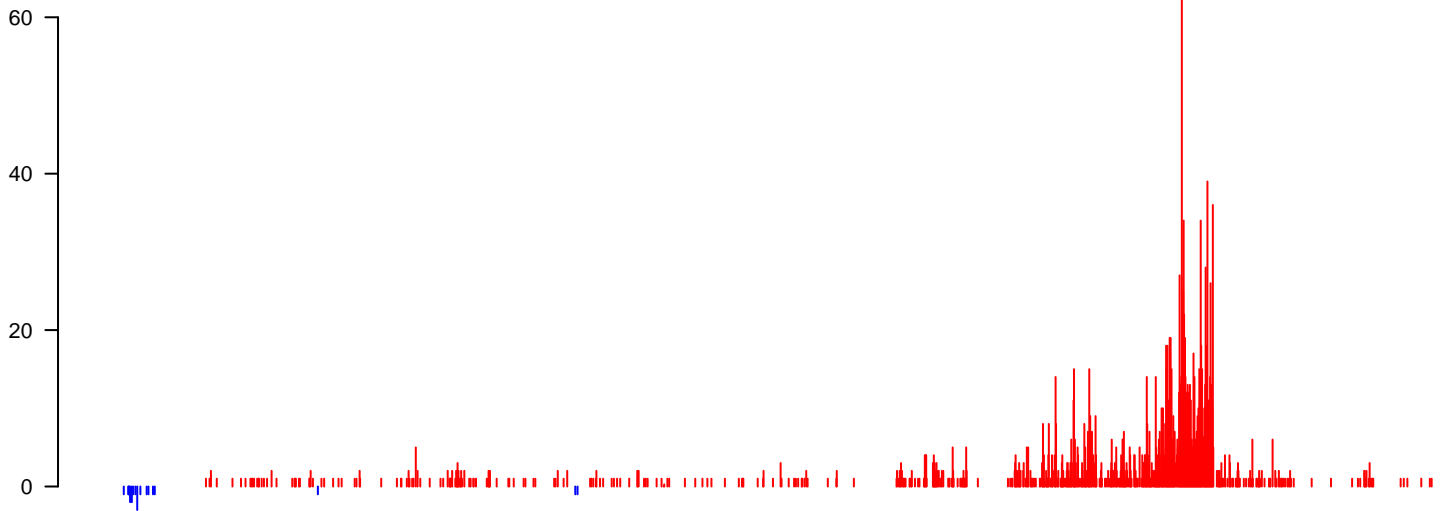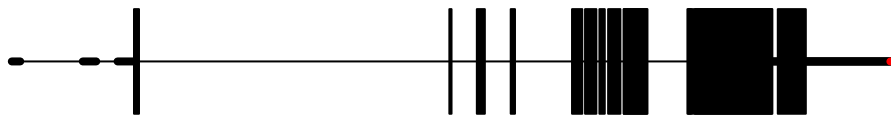

CG3638 X – 11111111 1130666

OSS unique reads

Dsp1 chr X : 16227645 - 16234490 +

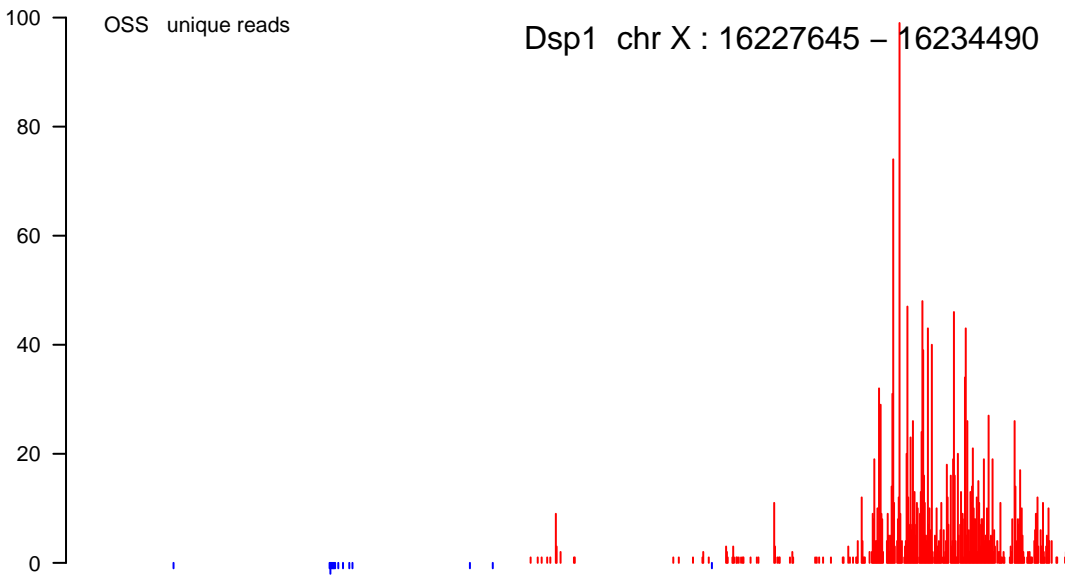

OSS norm. reads

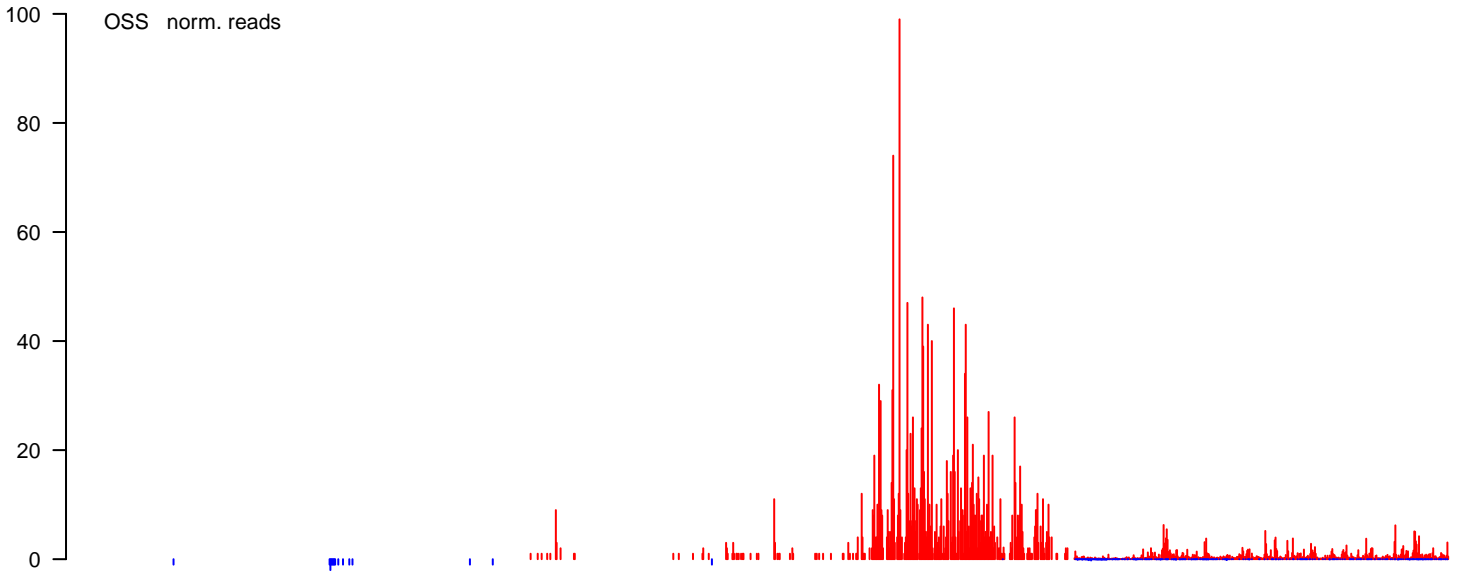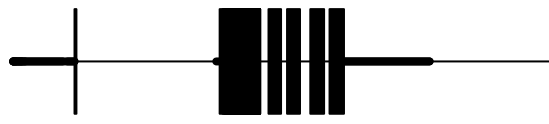

Dsp1 X + 16227645 16234490

OSS unique reads

CG10777 chr X : 7816175 - 7825388 -

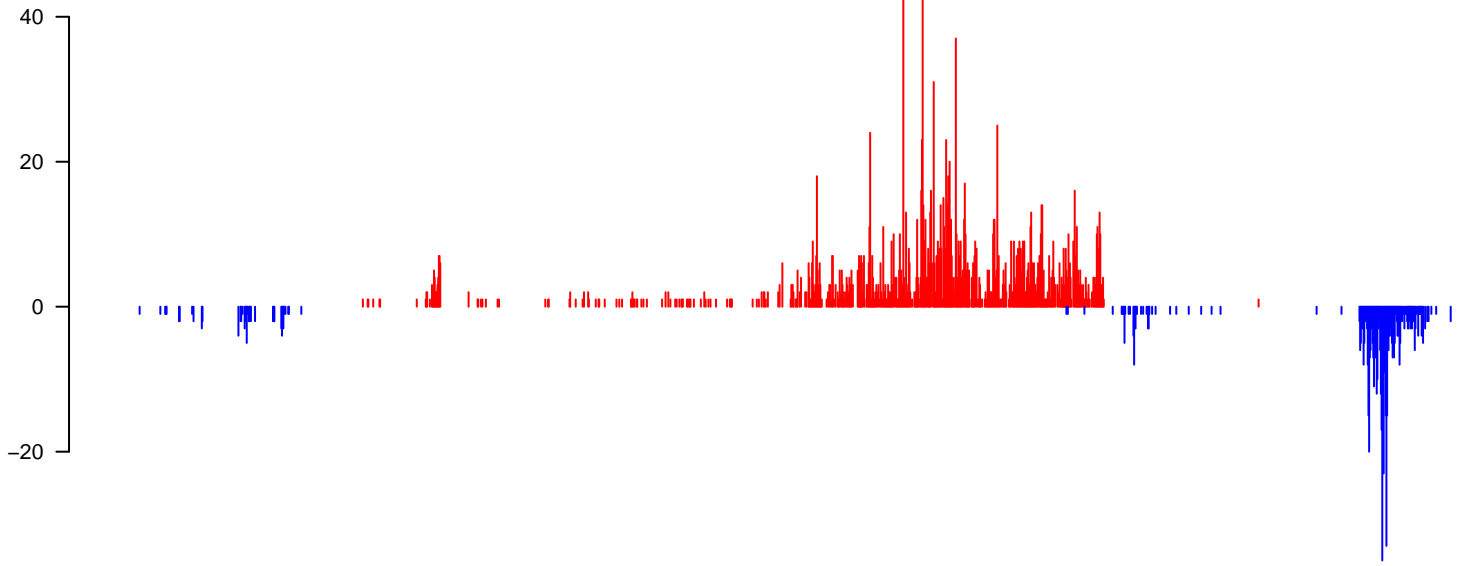

OSS norm. reads

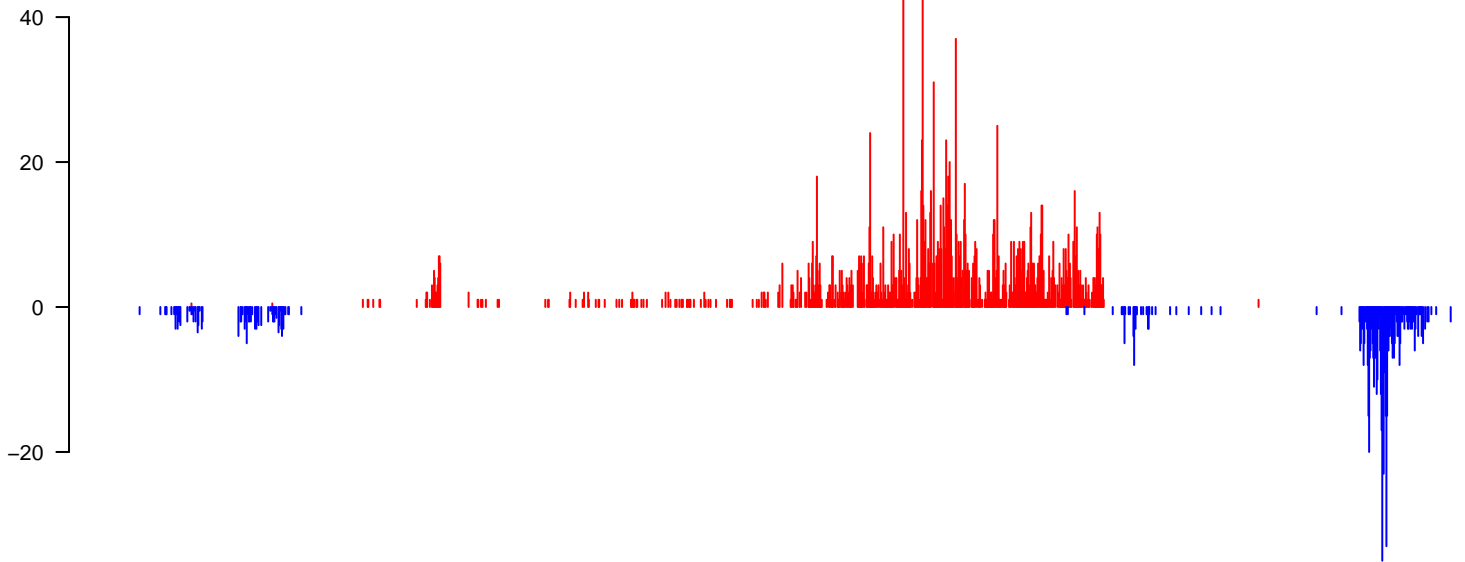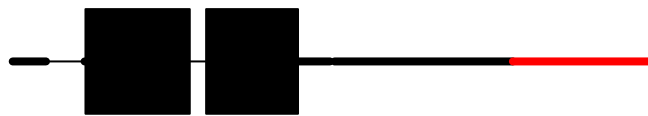

CG10777 X - 7816175 7825388

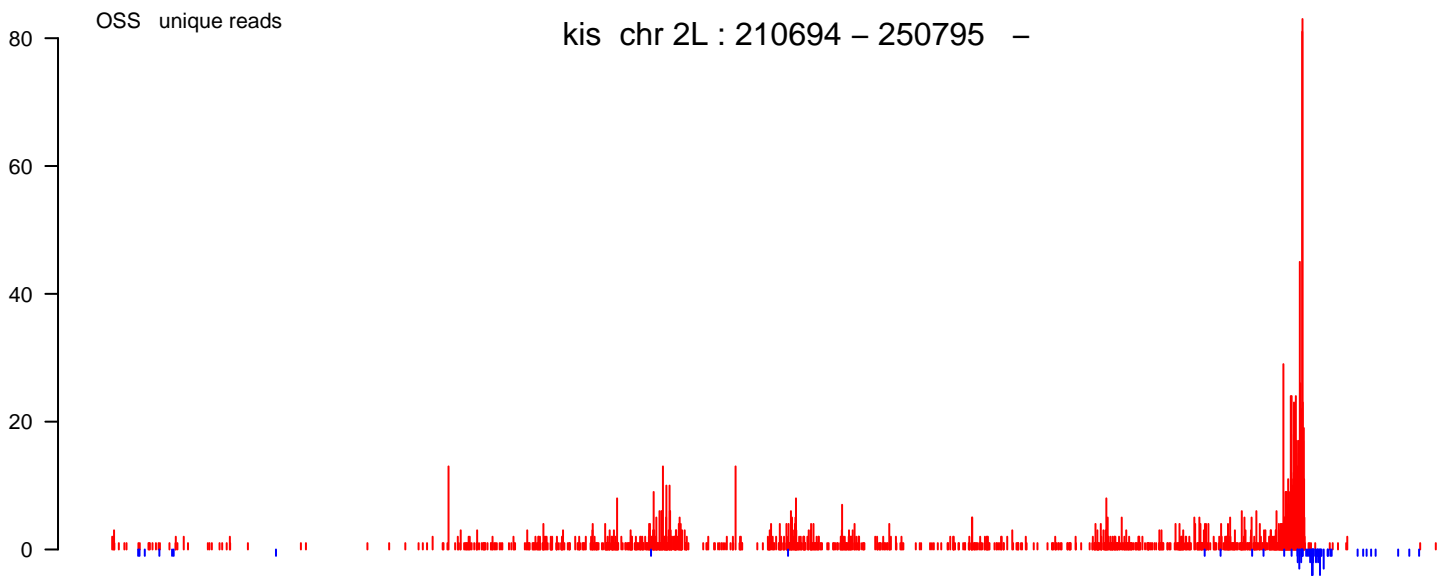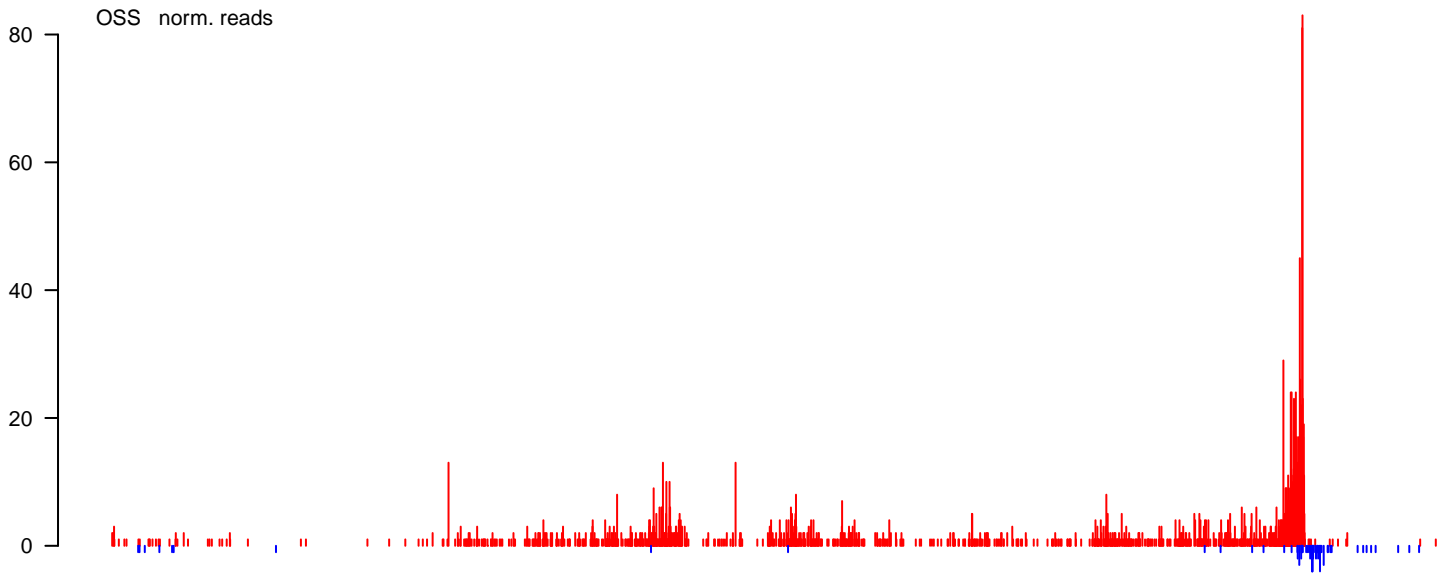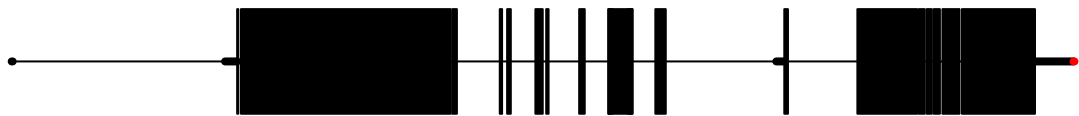

Invadolysin chr 3R : 5970421 – 5984944 +

OSS unique reads

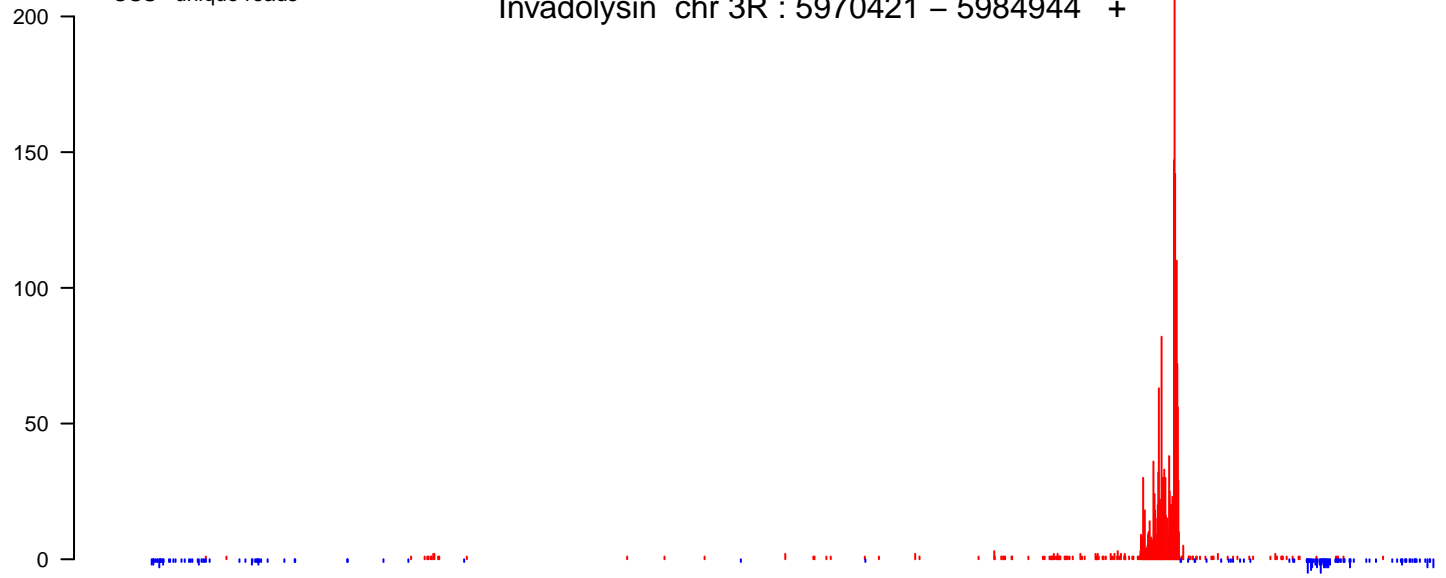

OSS norm. reads

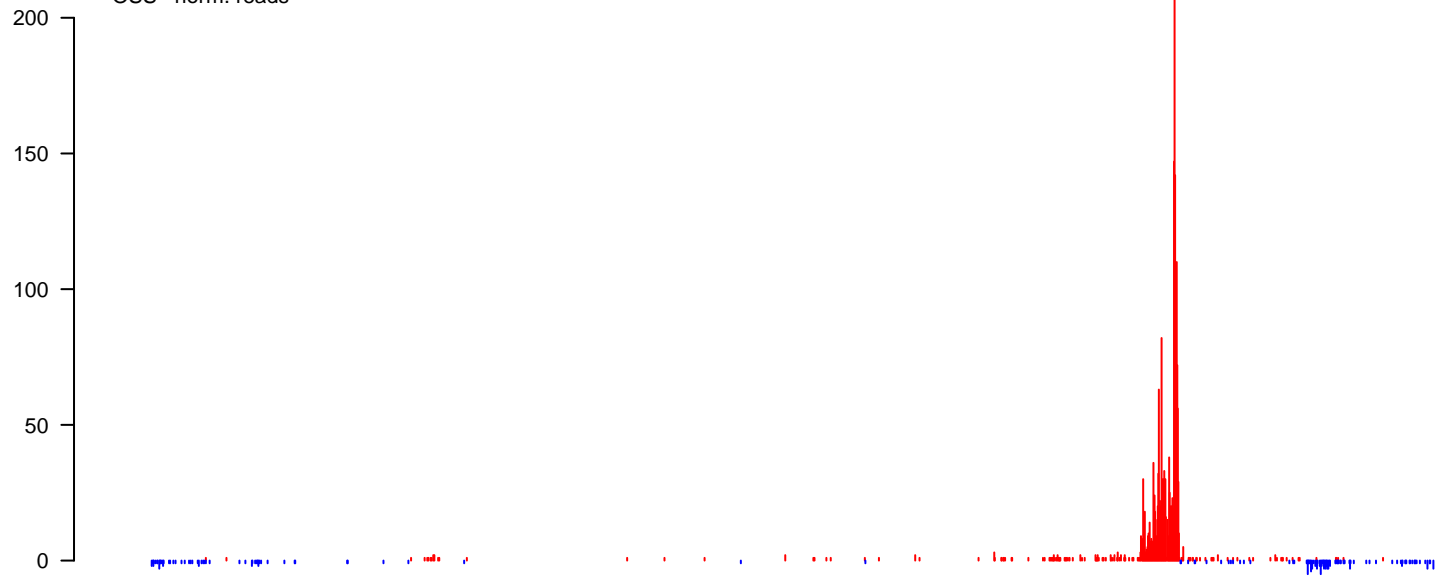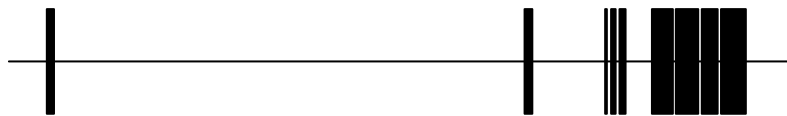

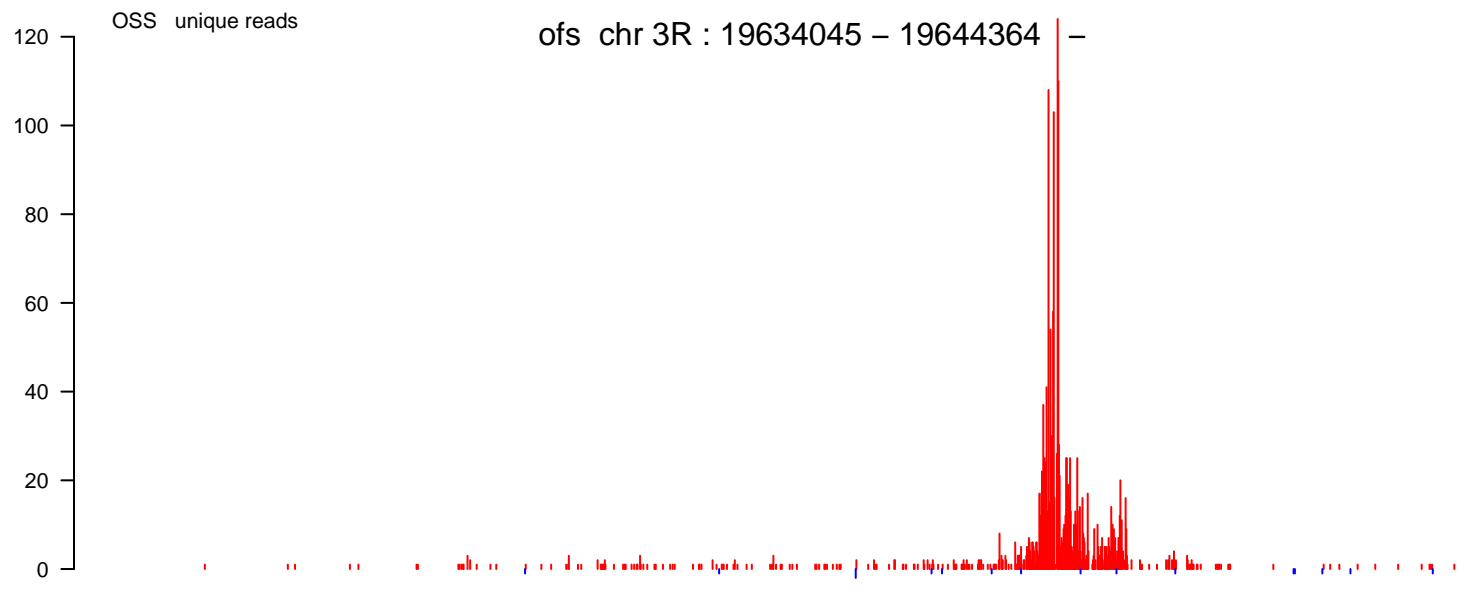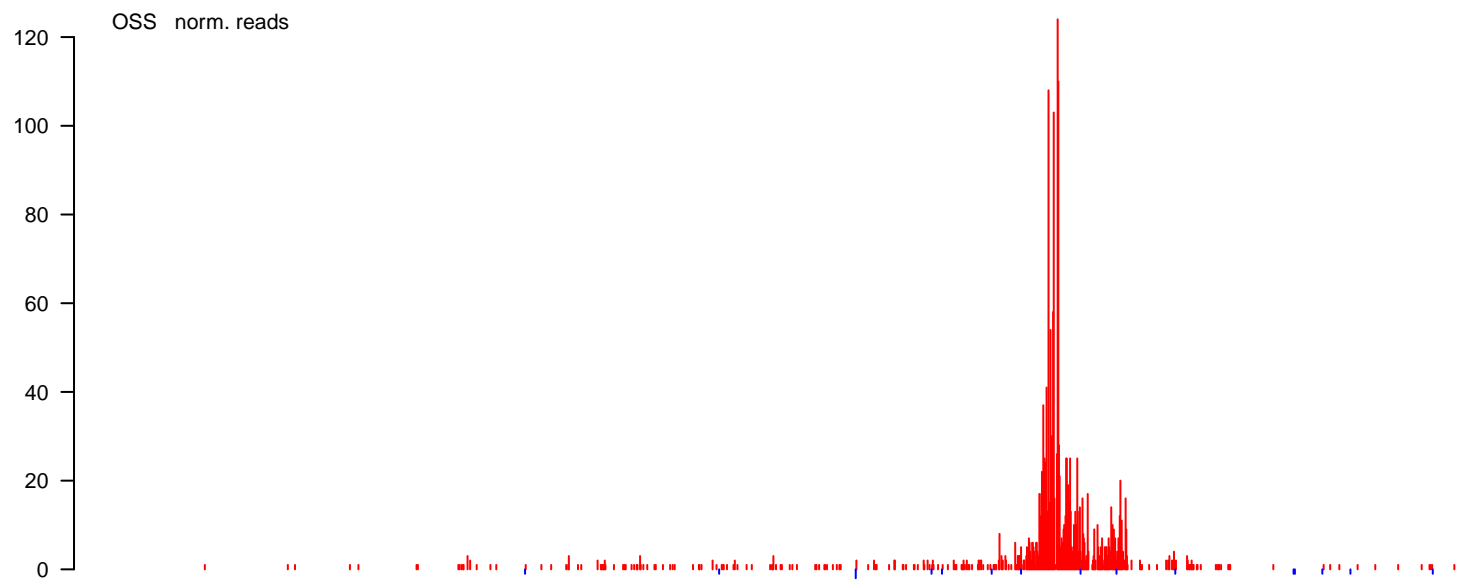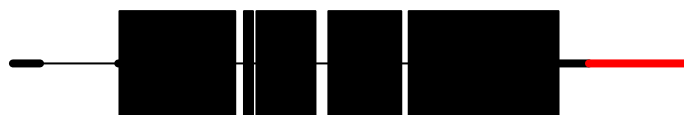

ofs 3R – 19634045 19644364



OSS unique reads

CG33936 chr 3R : 5167592 - 5187578 +

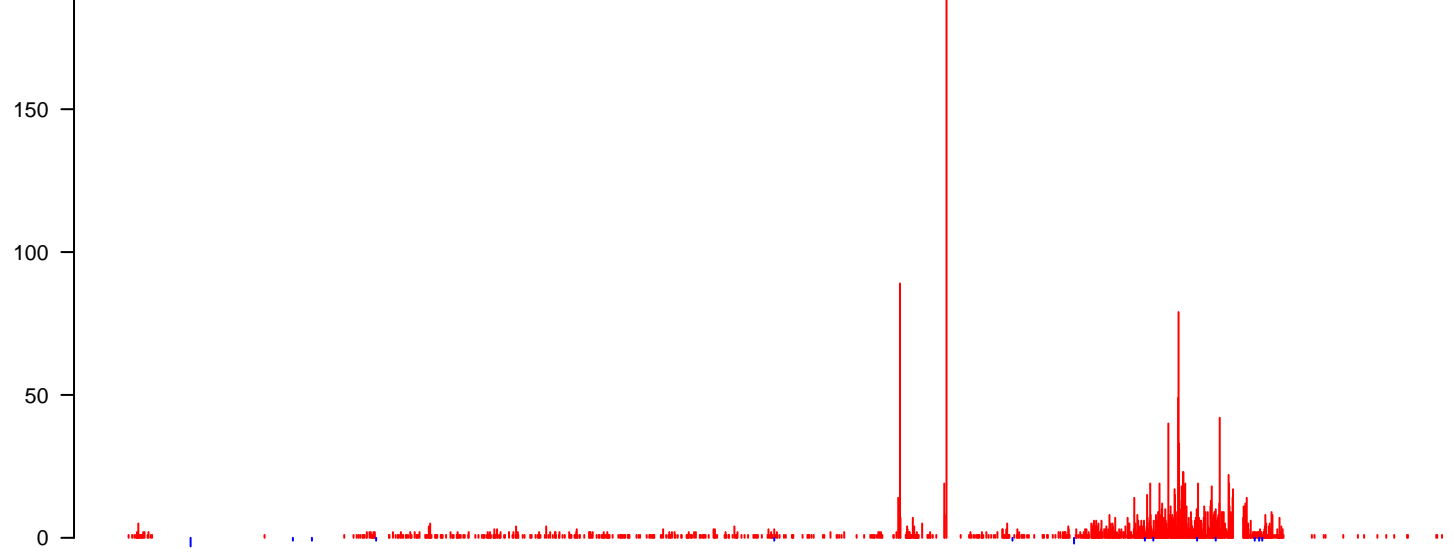

OSS norm. reads

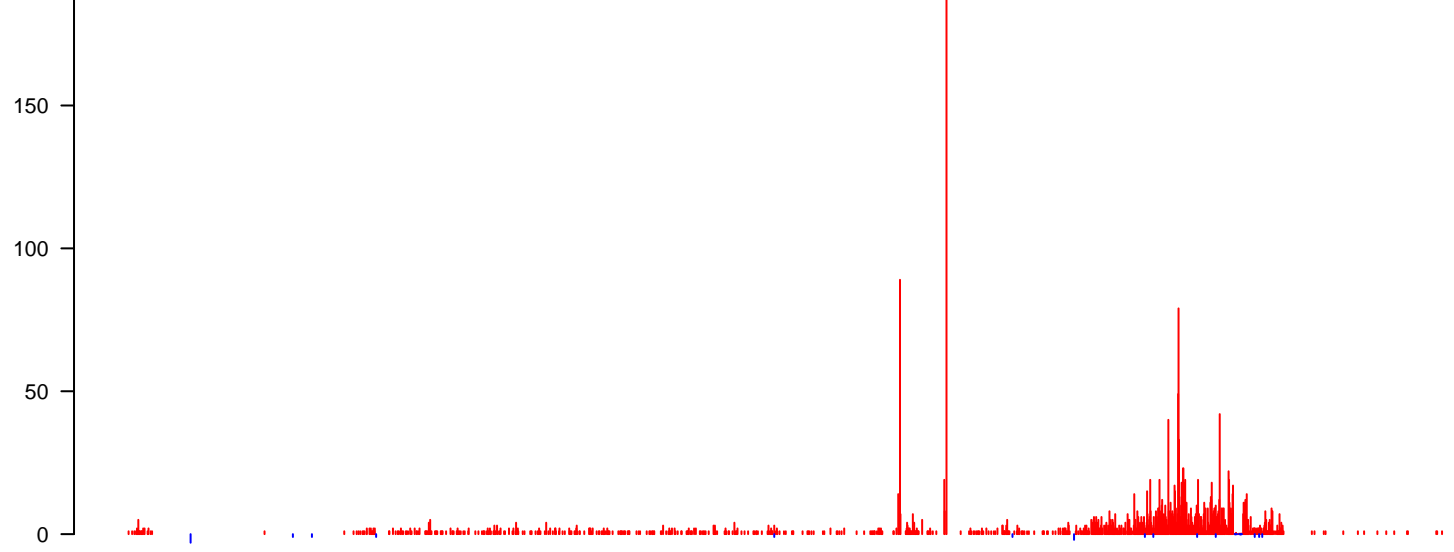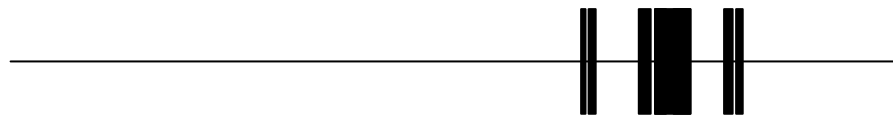

CG33936 3R + 5167592 5187578

OSS unique reads

alphaTub84B chr 3R : 2912260 – 2914582 +

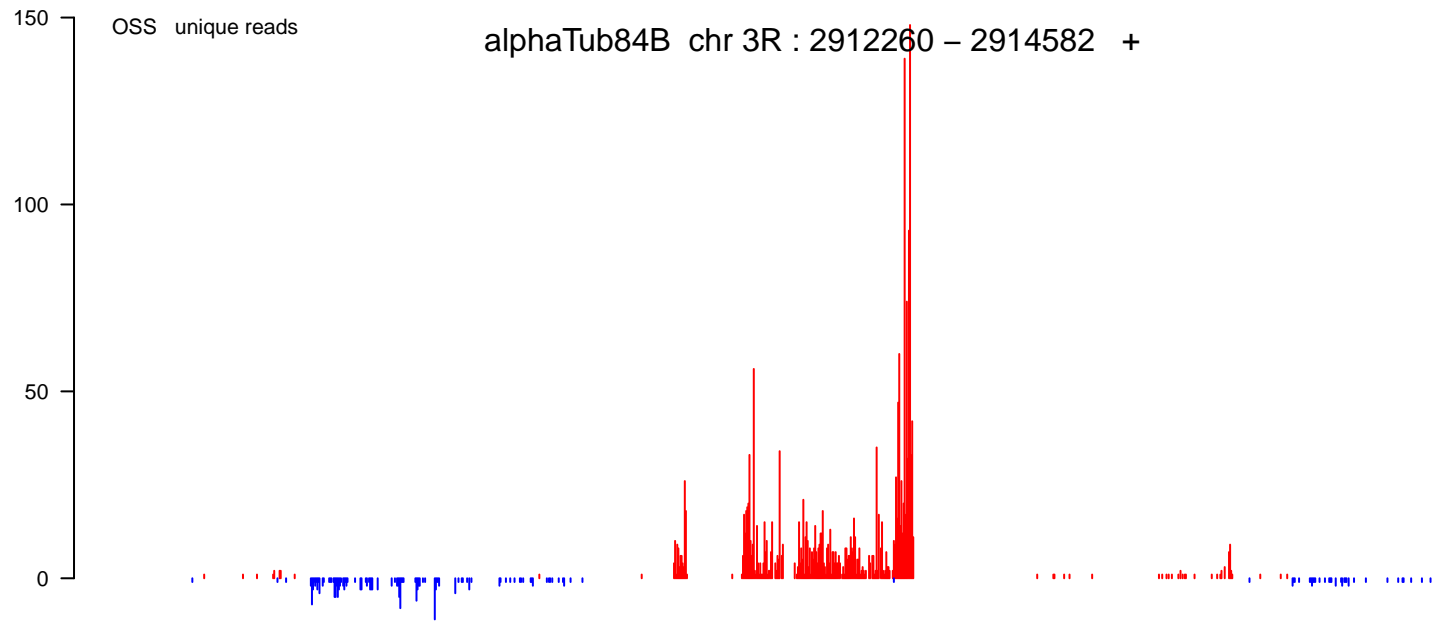

OSS norm. reads

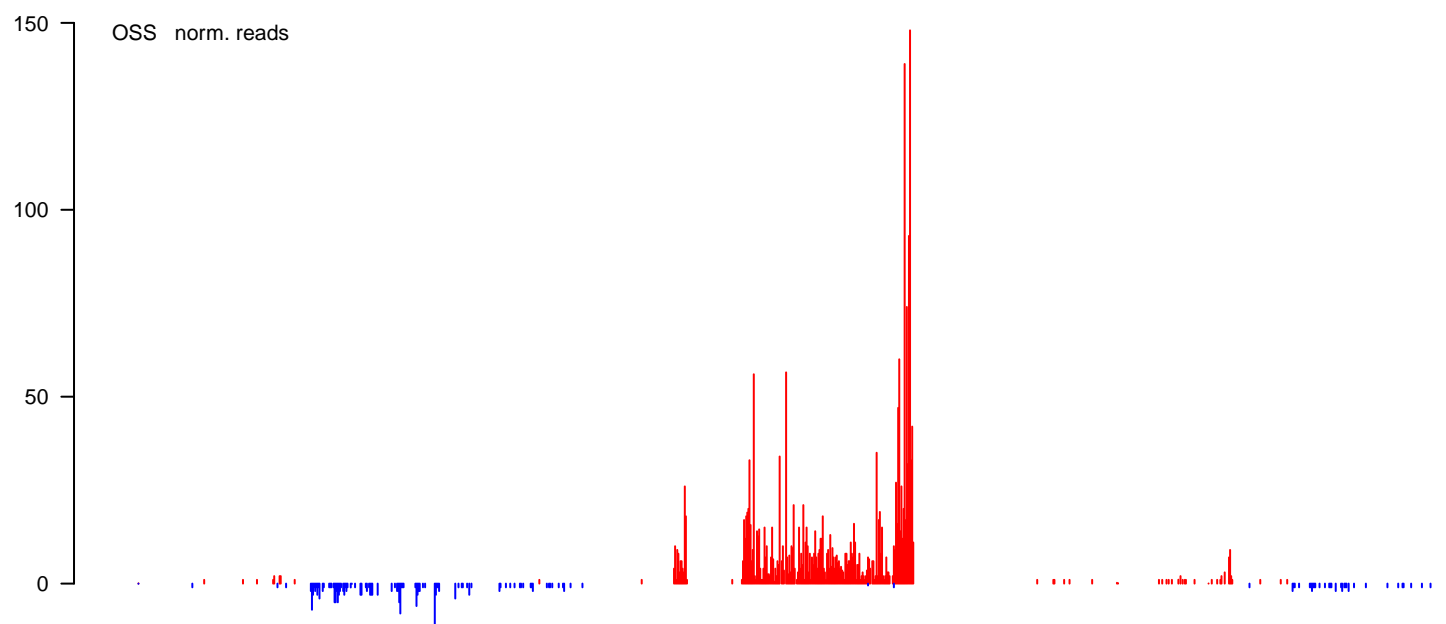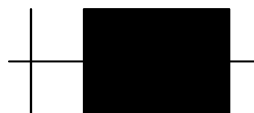

alphaTub84B 3R + 2912260 2914582

OSS unique reads

apt chr 2R : 19452420 – 19487223 +

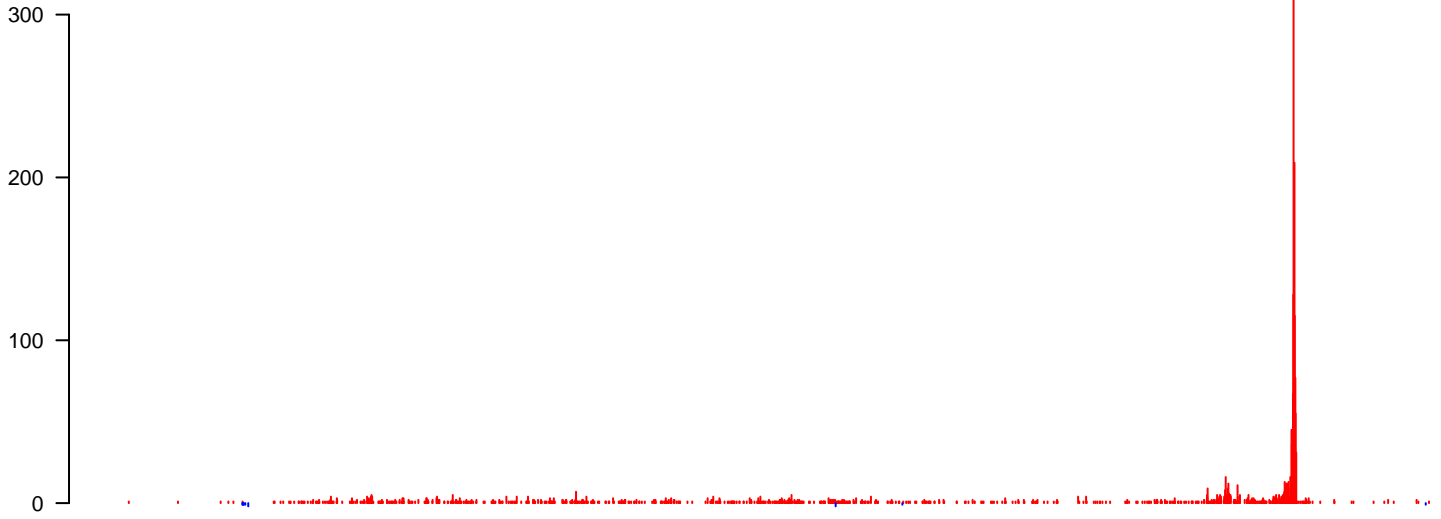

OSS norm. reads

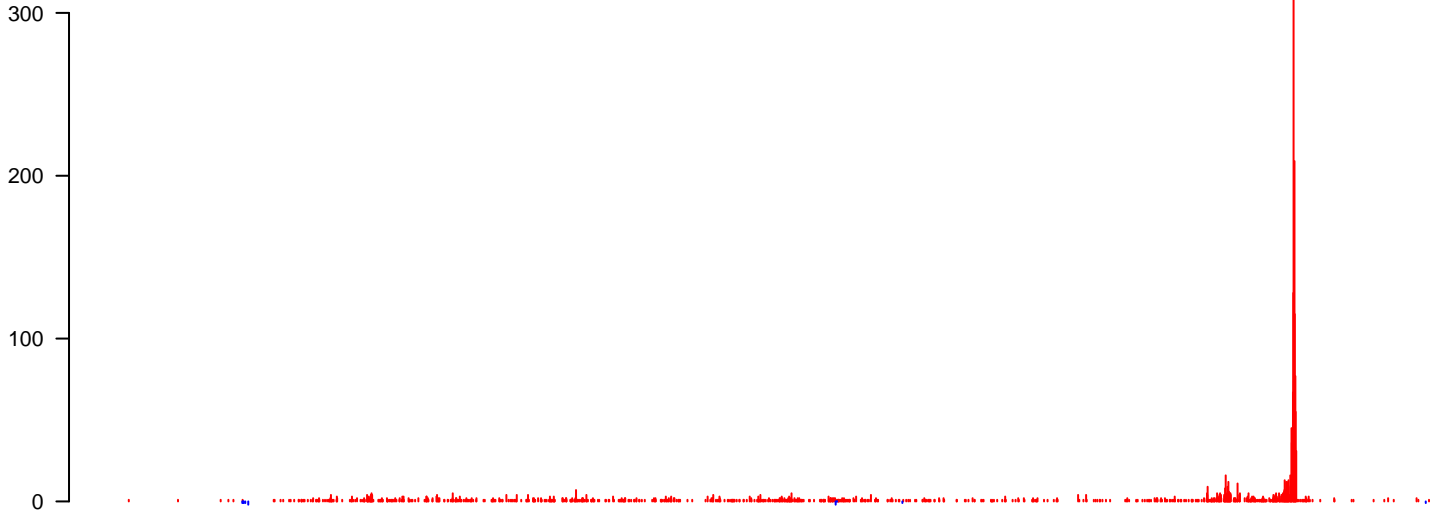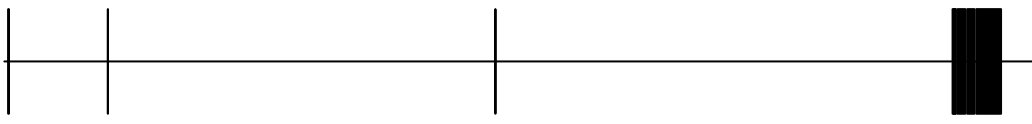

apt 2R + 19452420 19487223

zfh1 chr 3R : 26591648 – 26614989 +

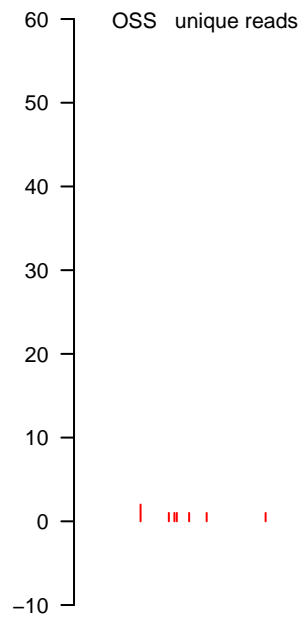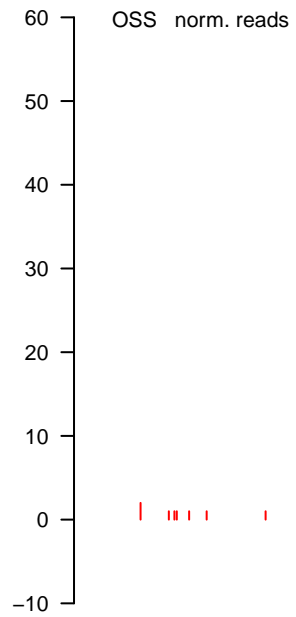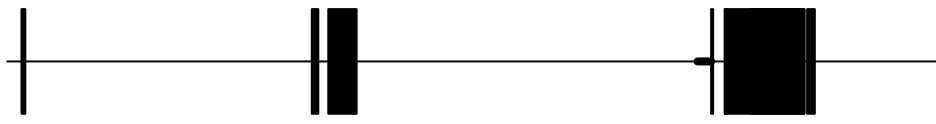

OSS unique reads

CG3689 chr 3L : 9404159 – 9407632 +

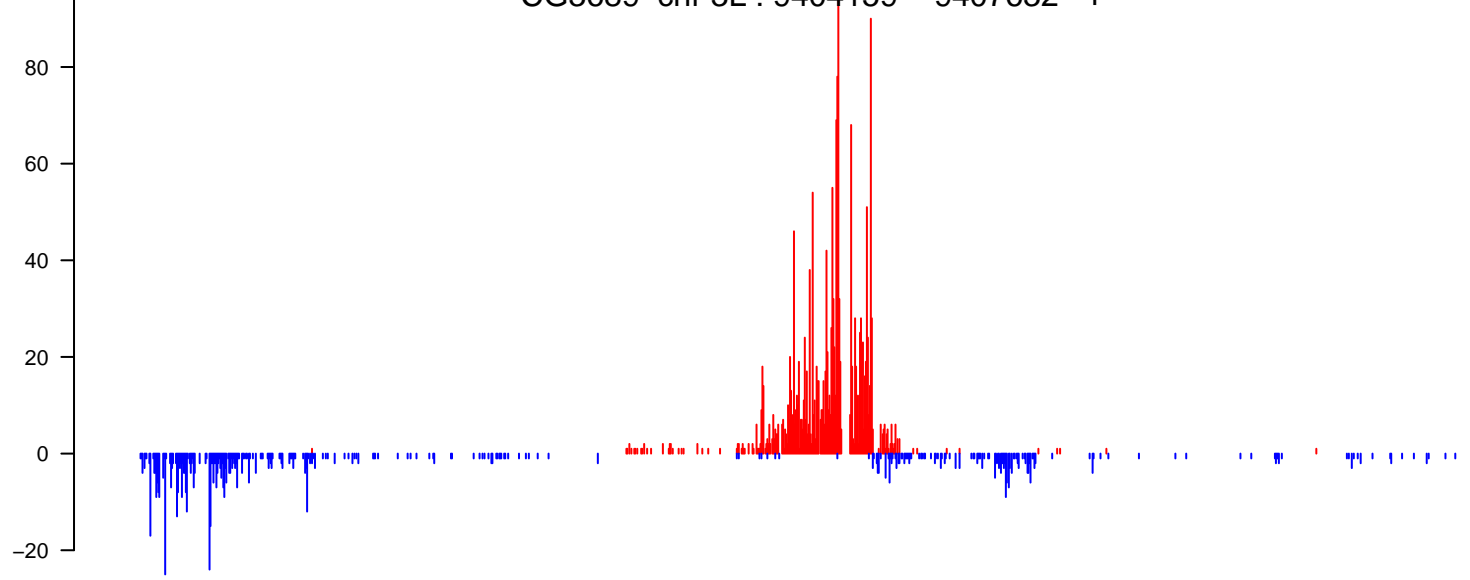

OSS norm. reads

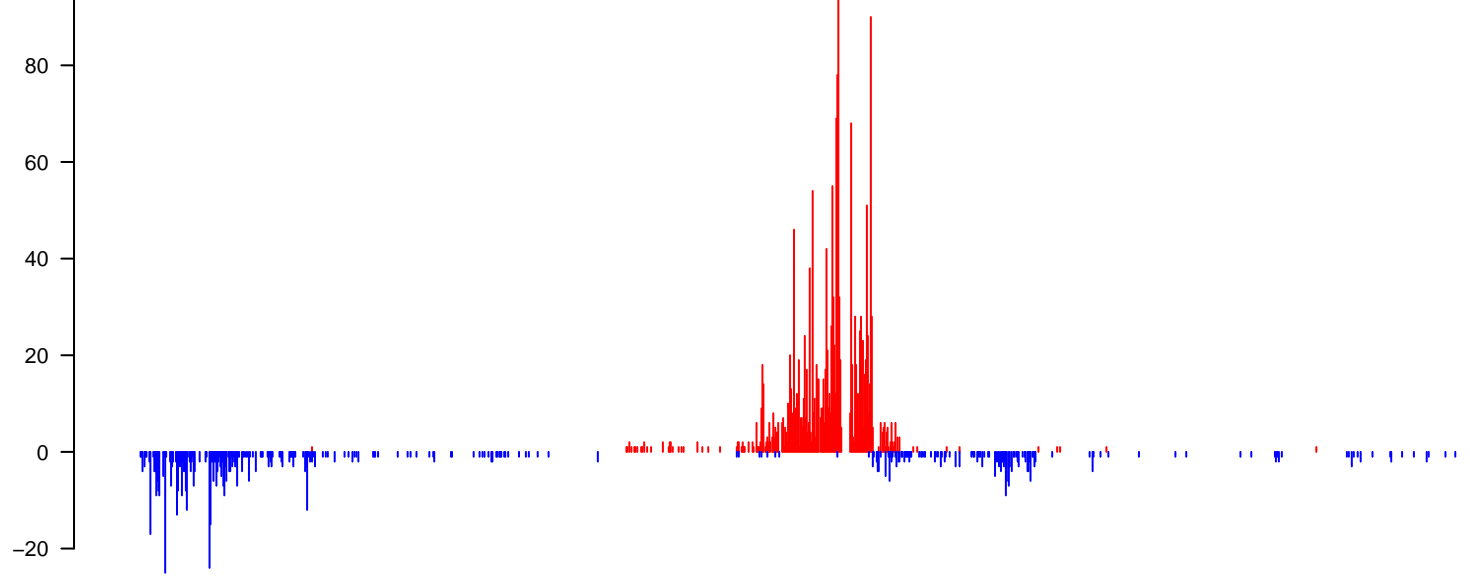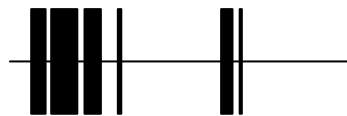

CG3689 3L + 9404159 9407632

OSS unique reads

Dp chr 2R : 9109902 – 9115714 +

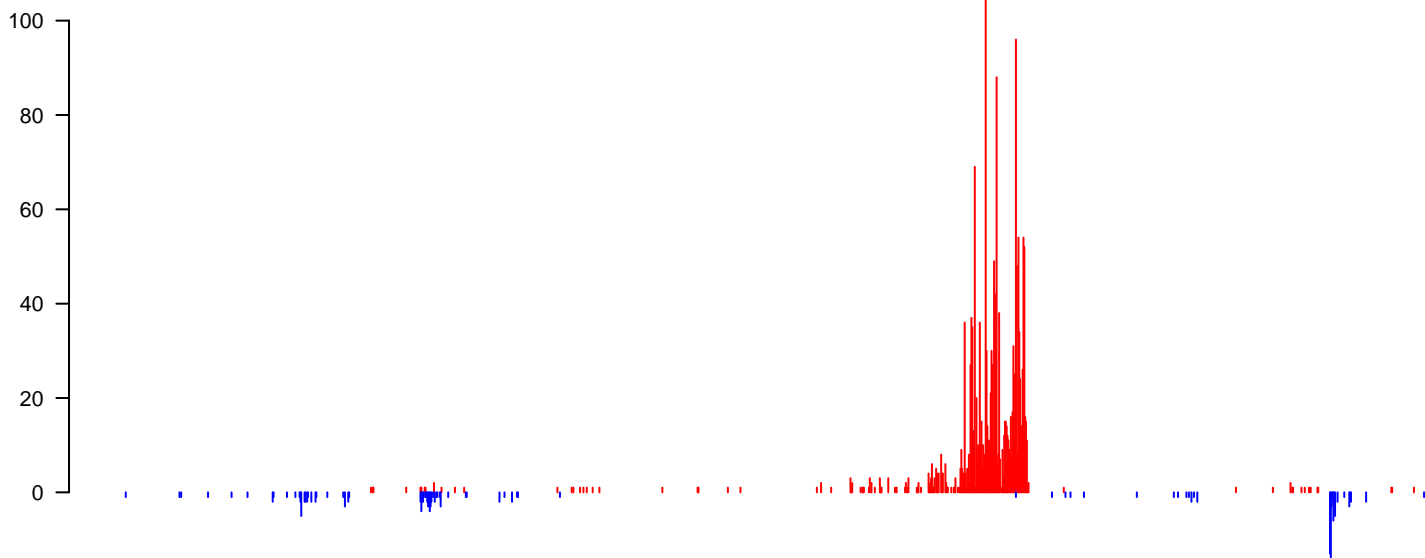

OSS norm. reads

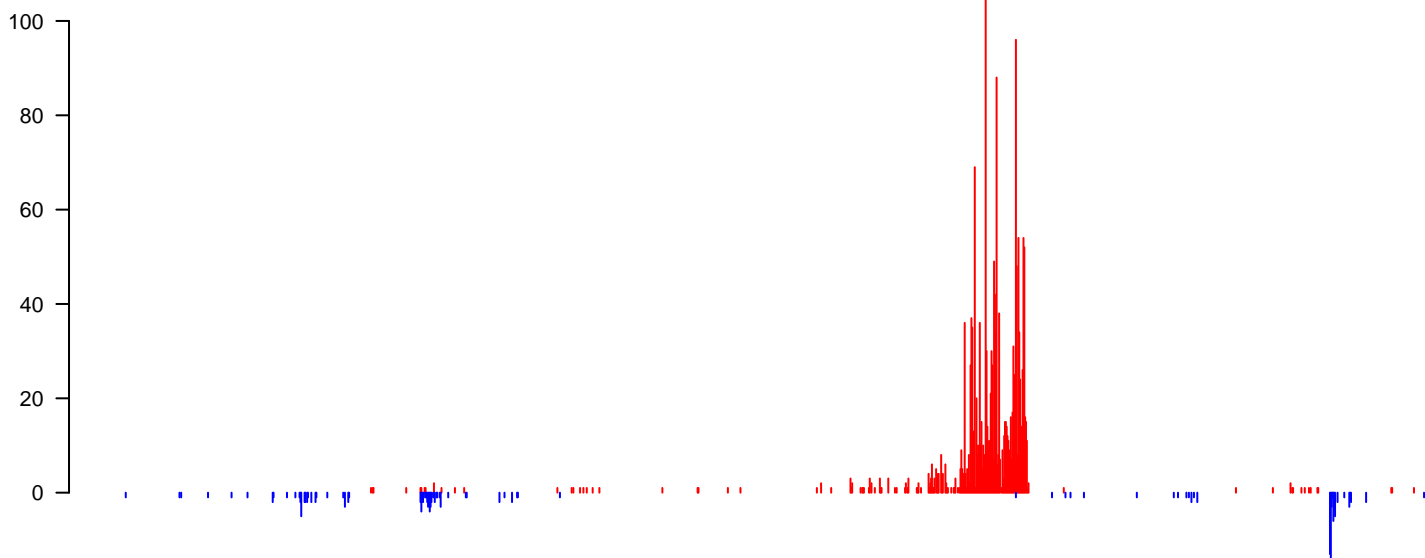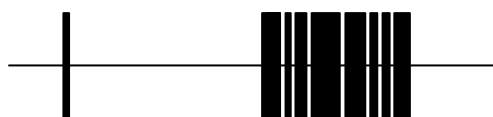

Dp 2R + 9109902 9115714

OSS unique reads

pAbp chr 2R : 14027583 – 14034635 +

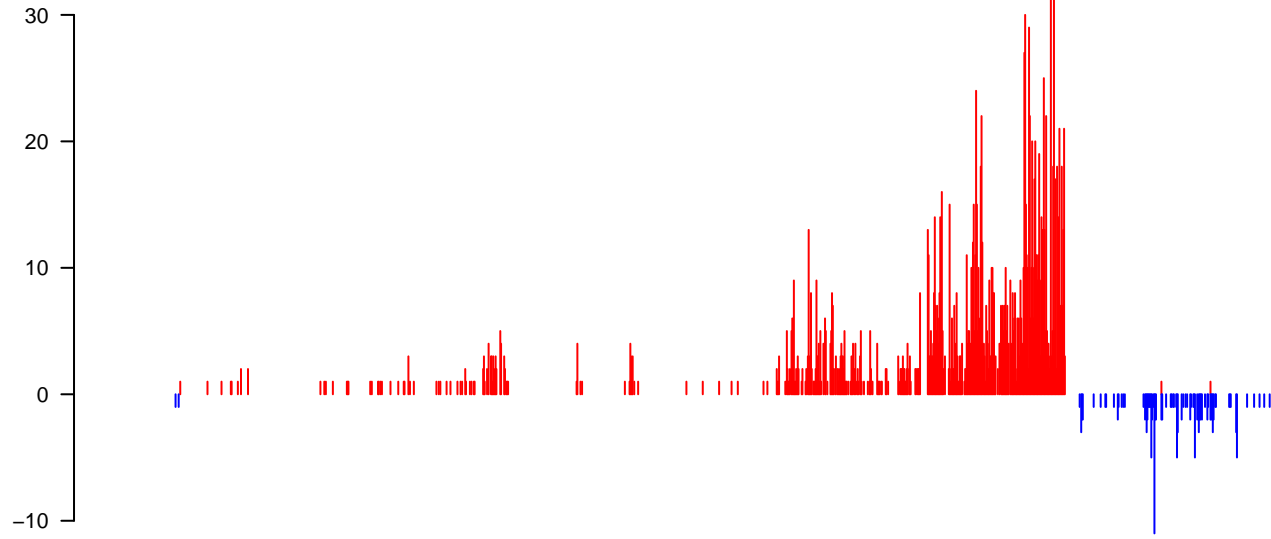

OSS norm. reads

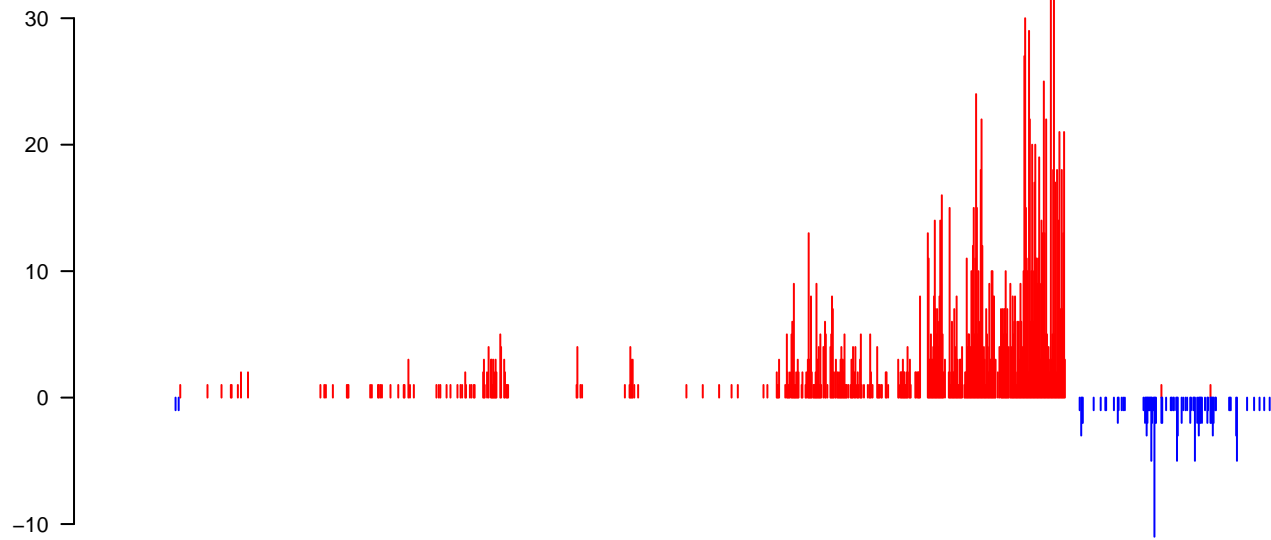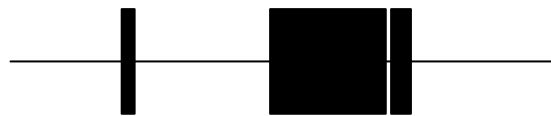

pAbp 2R + 14027583 14034635

roq chr 3L : 16365428 – 16371750 –

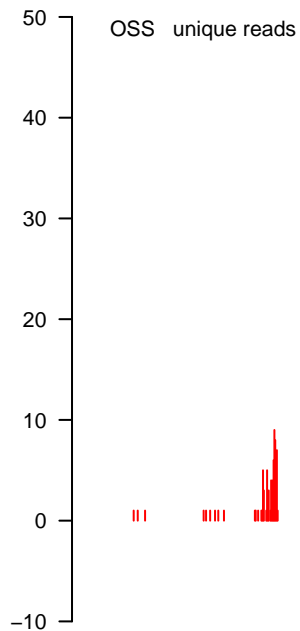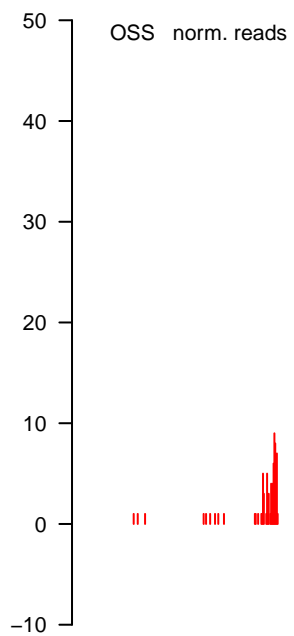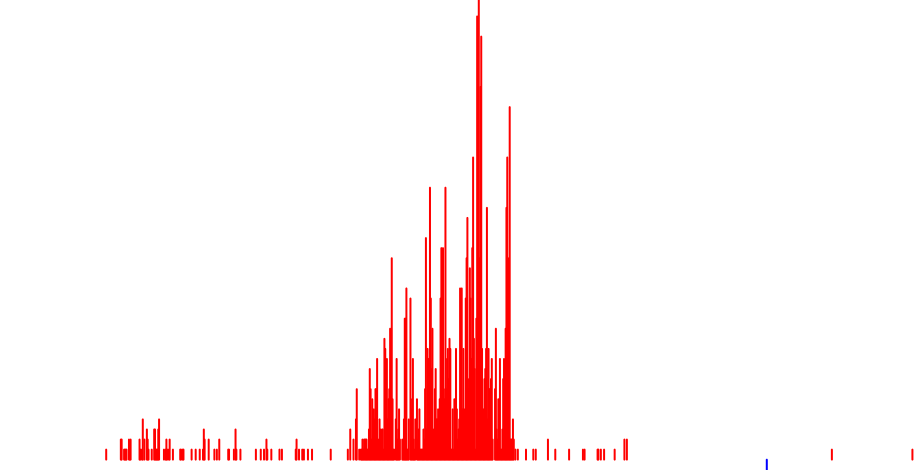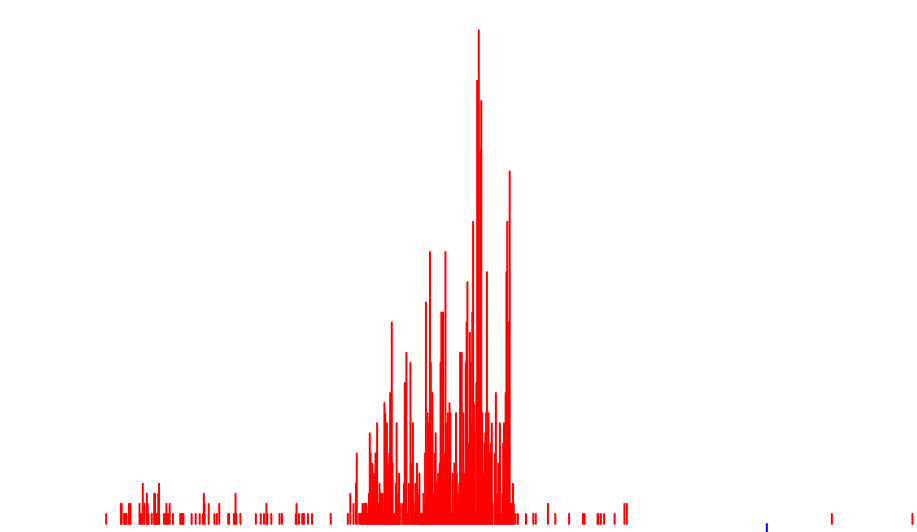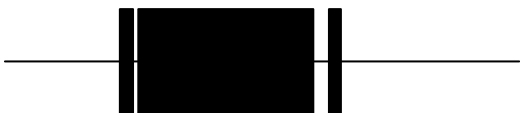

roq 3L – 16365428 16371750



OSS unique reads

CG10171 chr 3L : 13379019 – 13380969 –

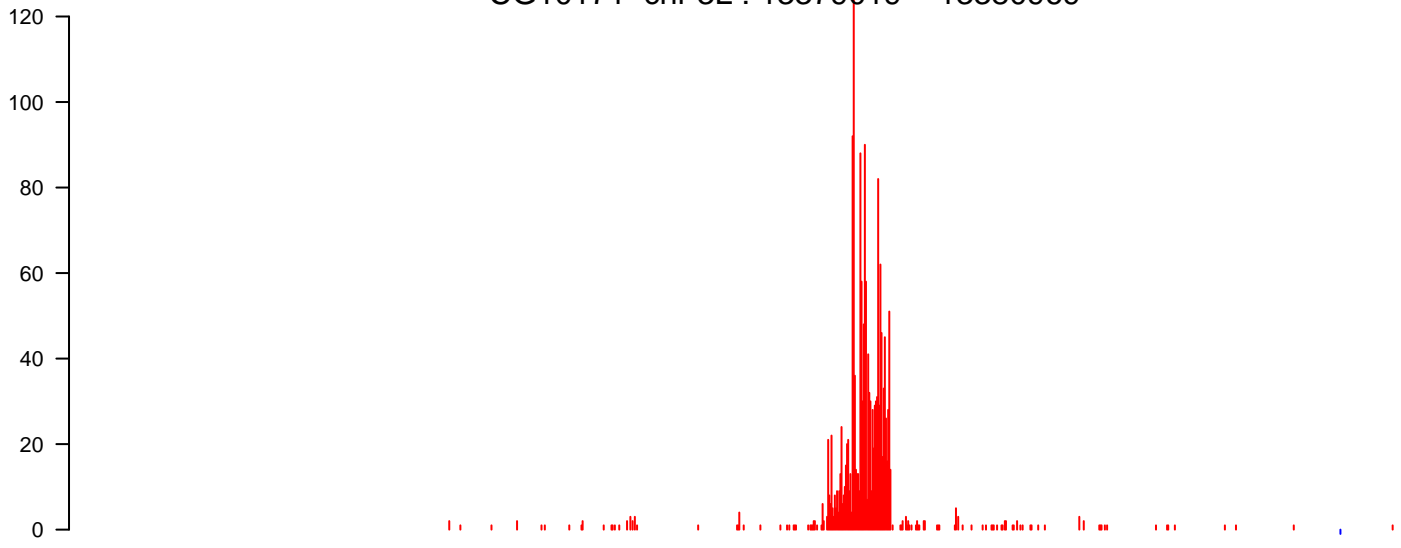

OSS norm. reads

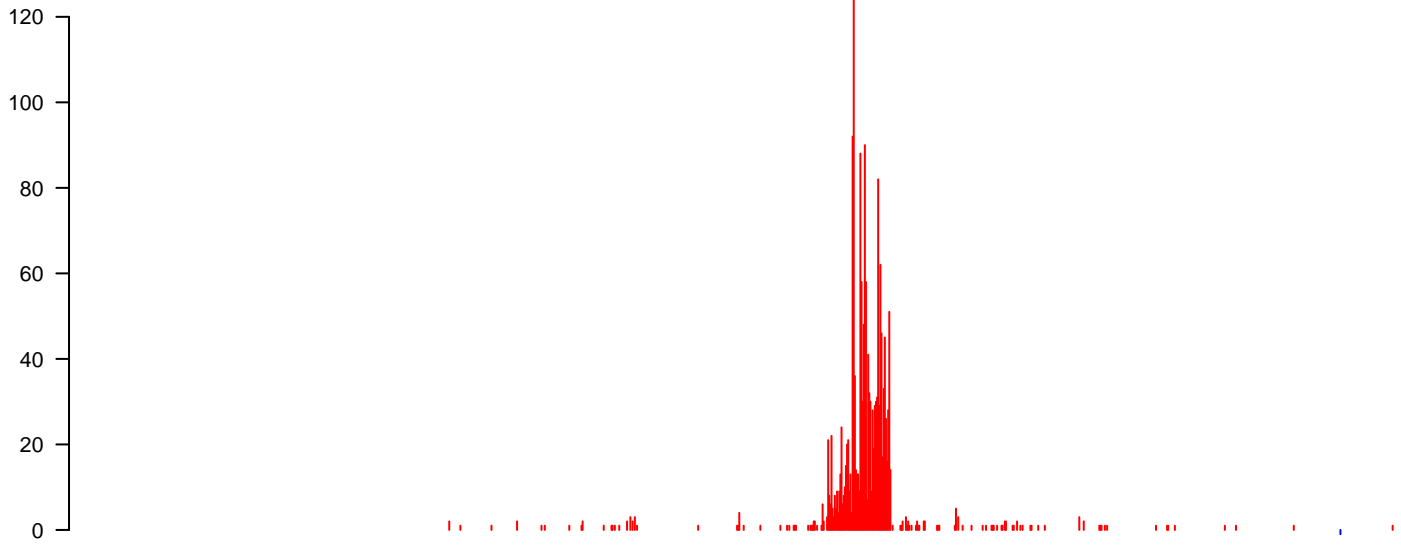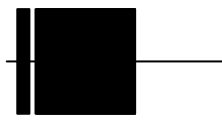

OSS unique reads

CG6330 chr 3R : 22775375 – 22784209 –

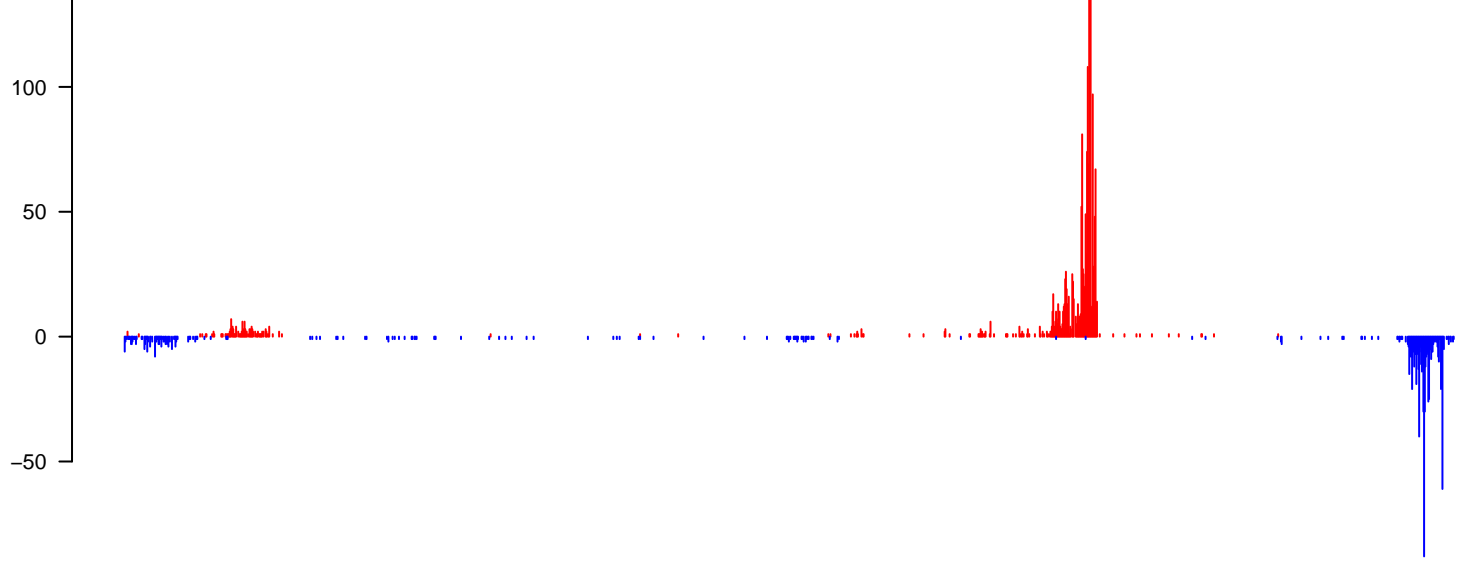

OSS norm. reads

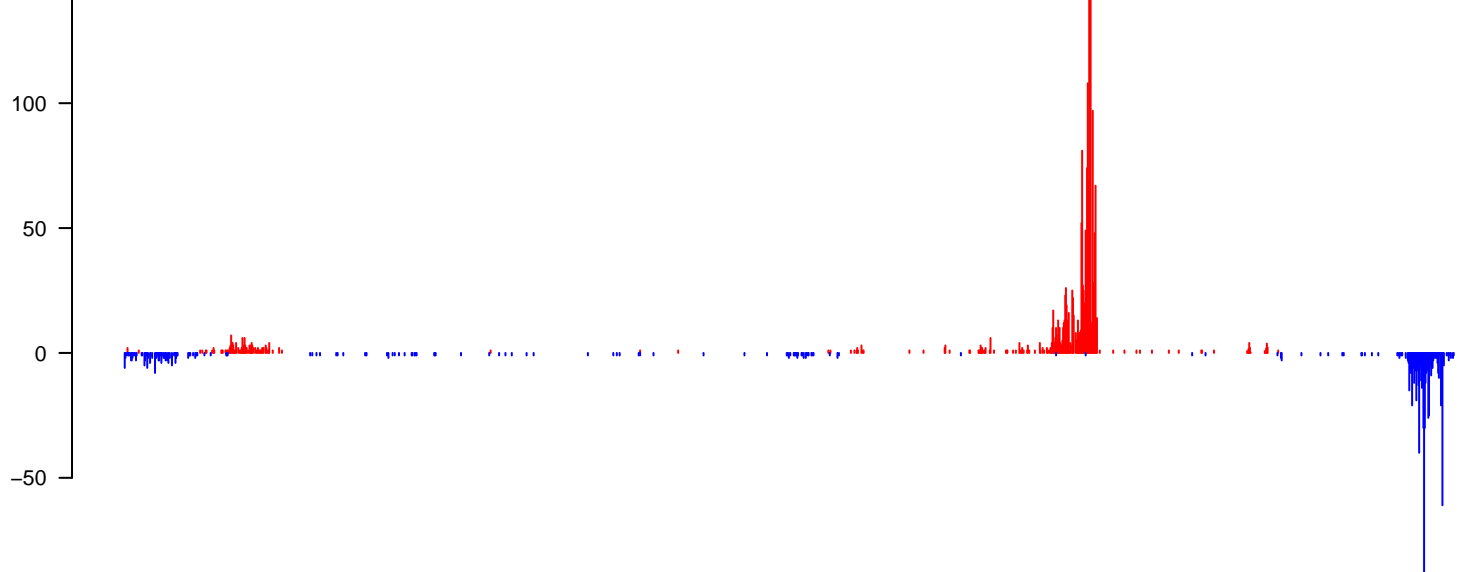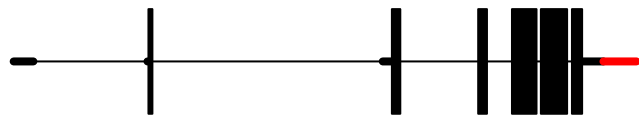

OSS unique reads

Eip75B chr 3L : 17945063 – 18052698 –

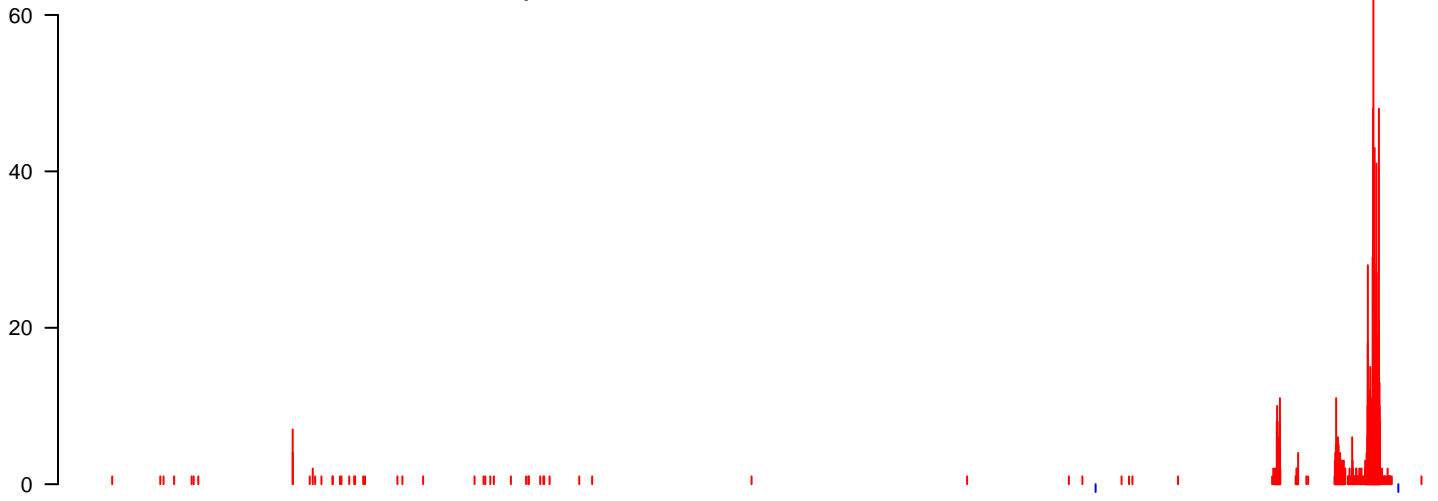

OSS norm. reads

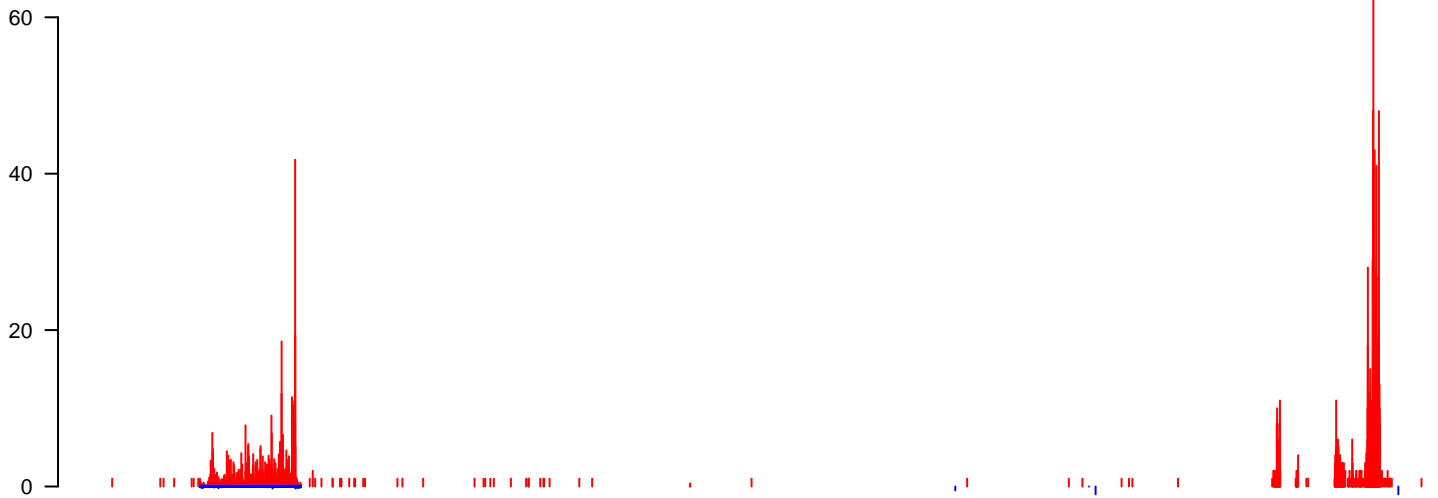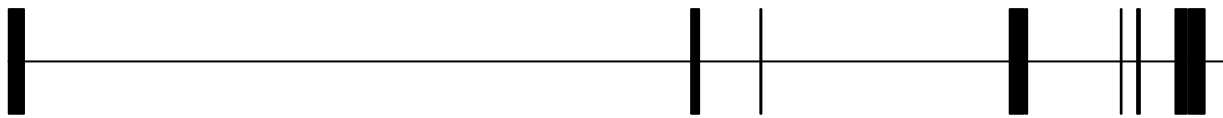

CG11265 chr X : 8454668 – 8464193 +

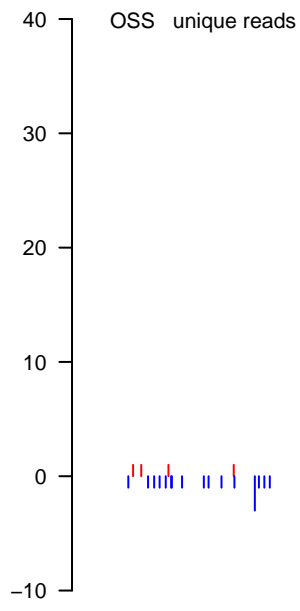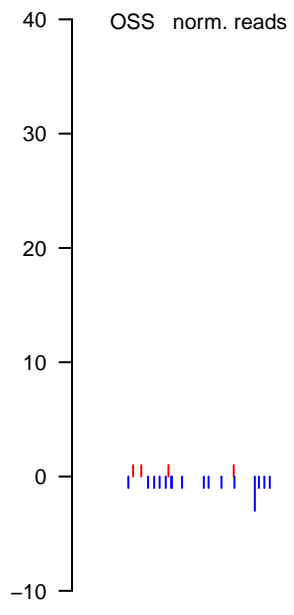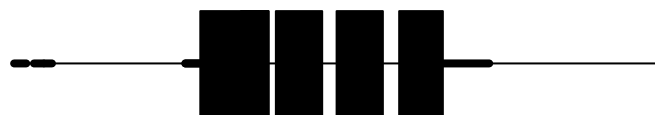

OSS unique reads

kay chr 3R : 25592707 – 25620037 +

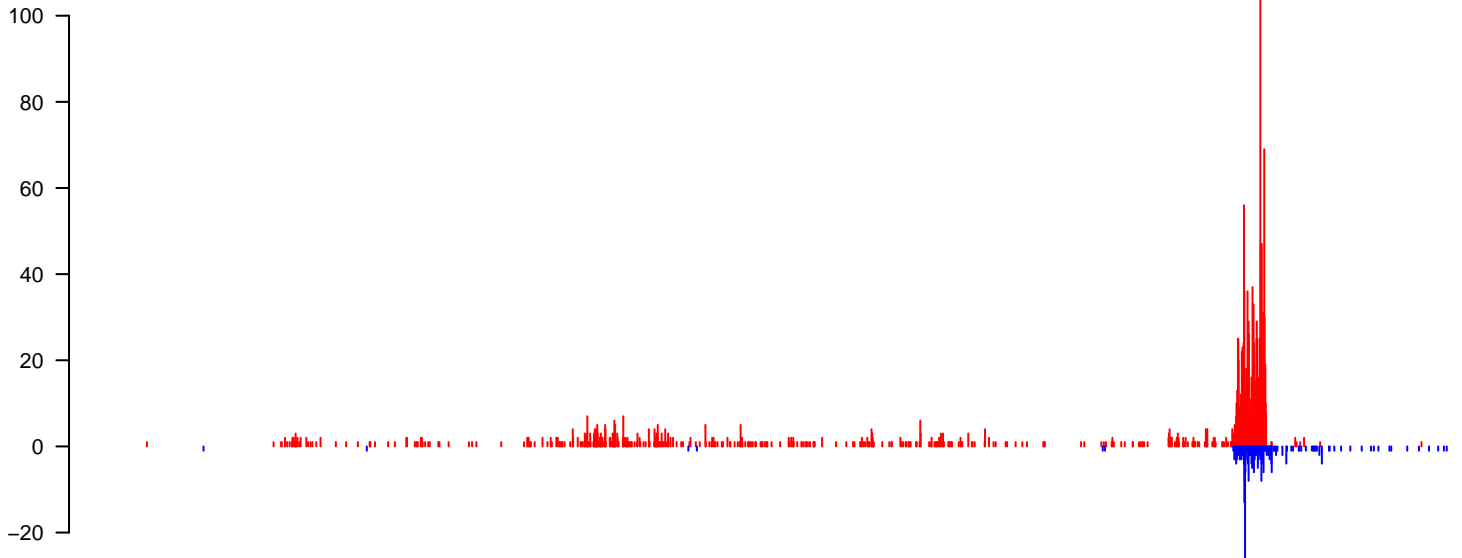

OSS norm. reads

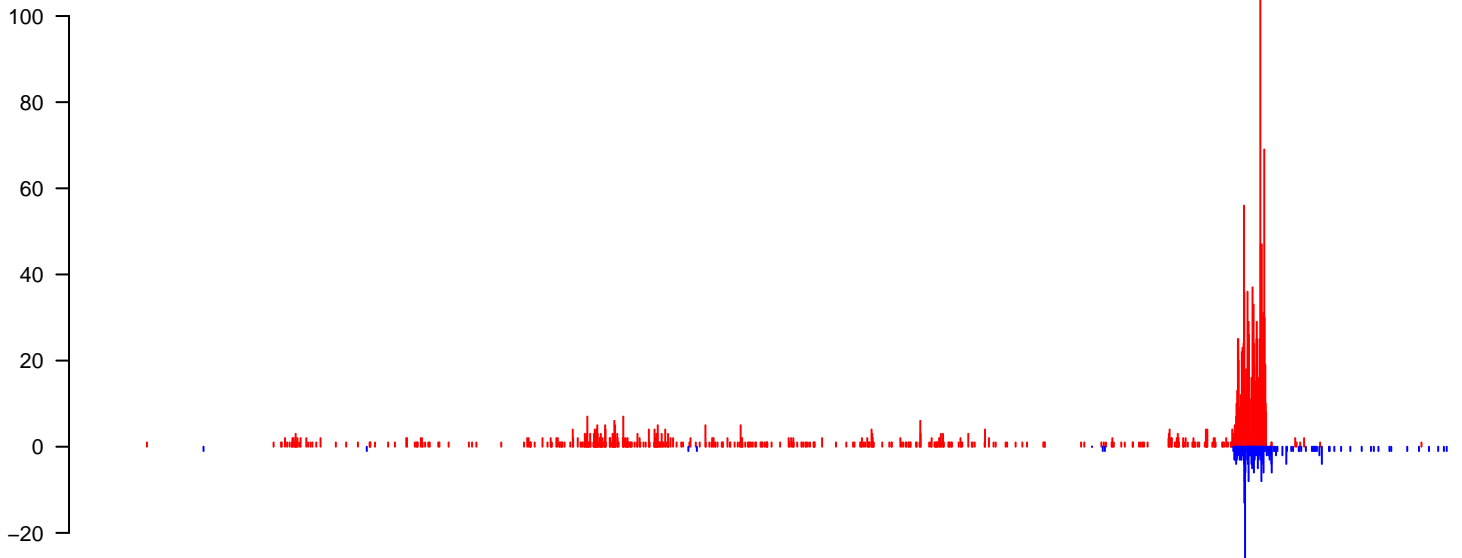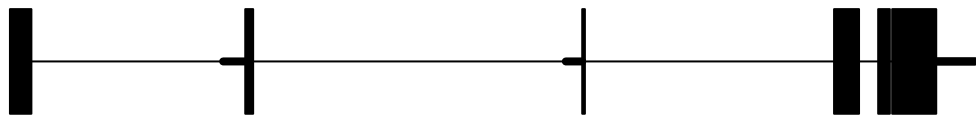

kay 3R + 25592707 25620037

OSS unique reads

Map205 chr 3R : 27880810 – 27894162

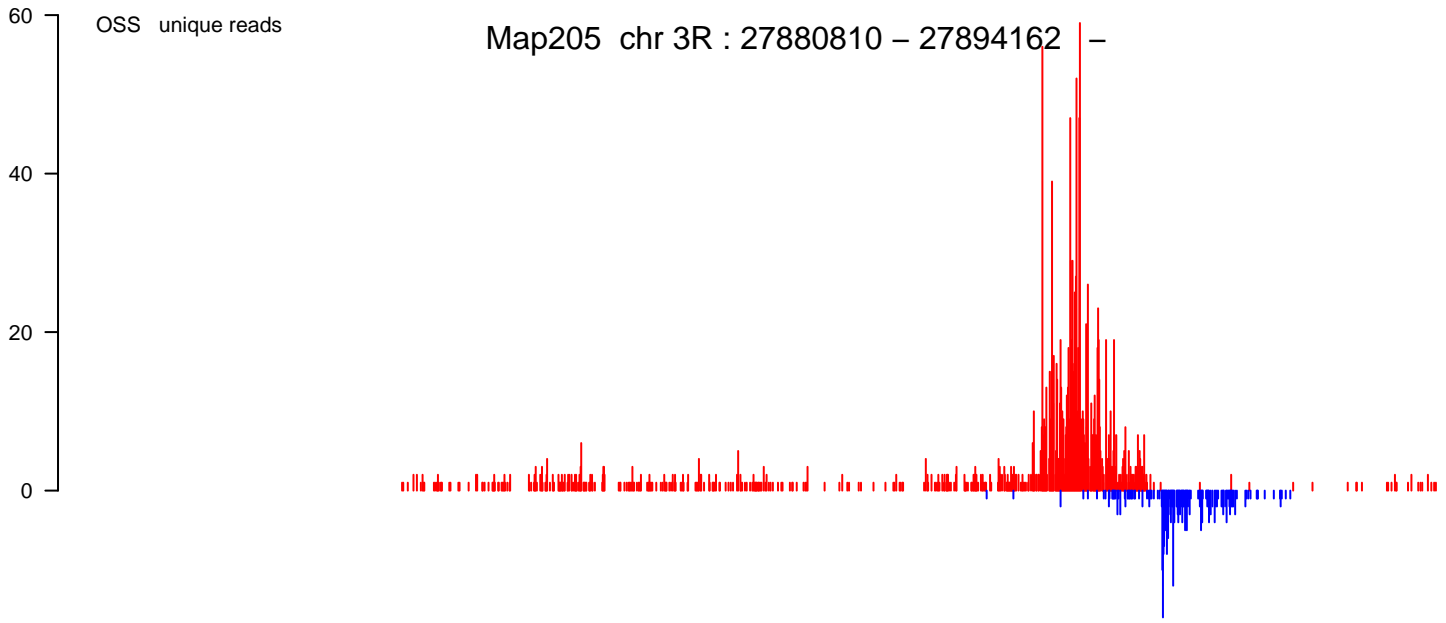

OSS norm. reads

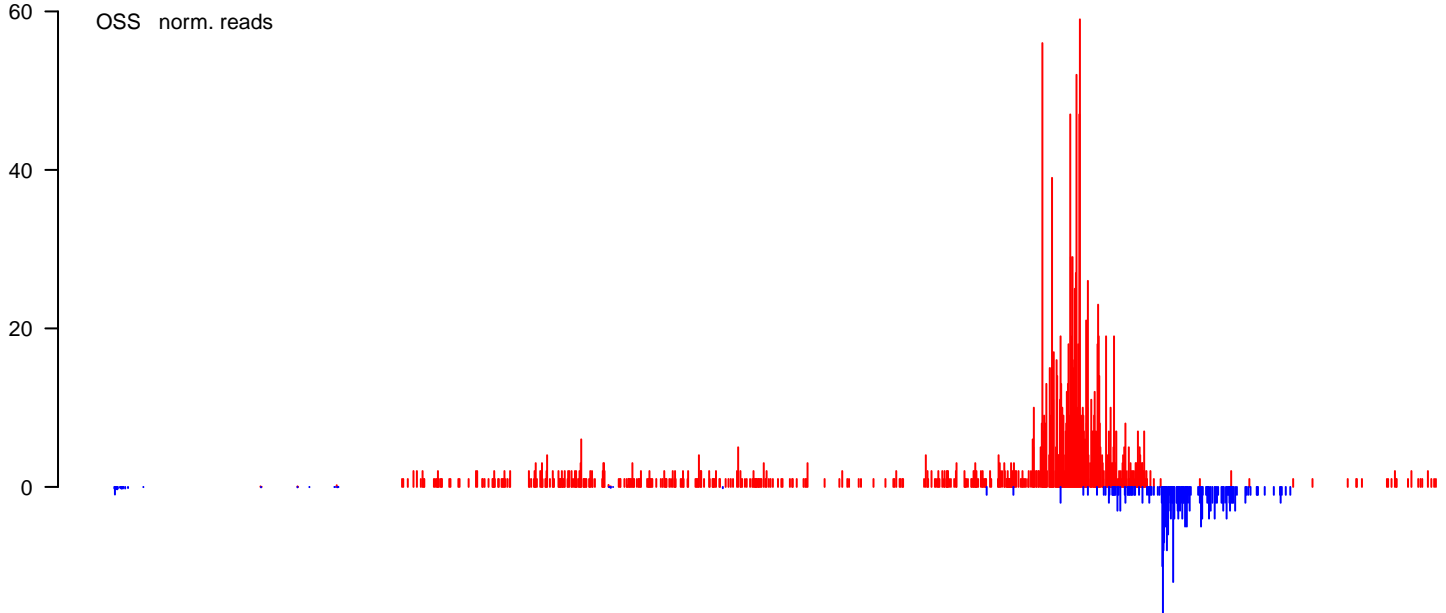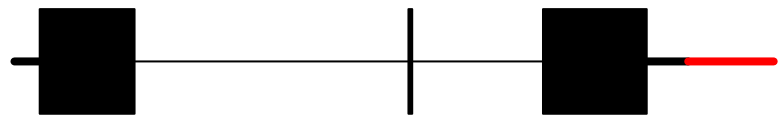

Ir chr 3R : 19004801 – 19011396 +

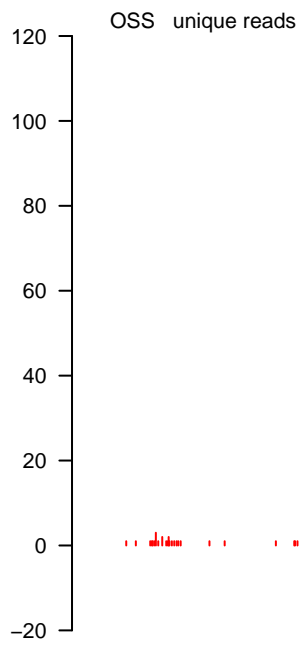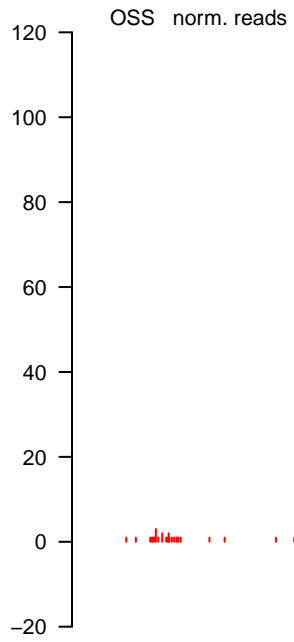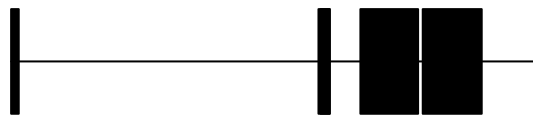

Ir 3R + 19004801 19011396

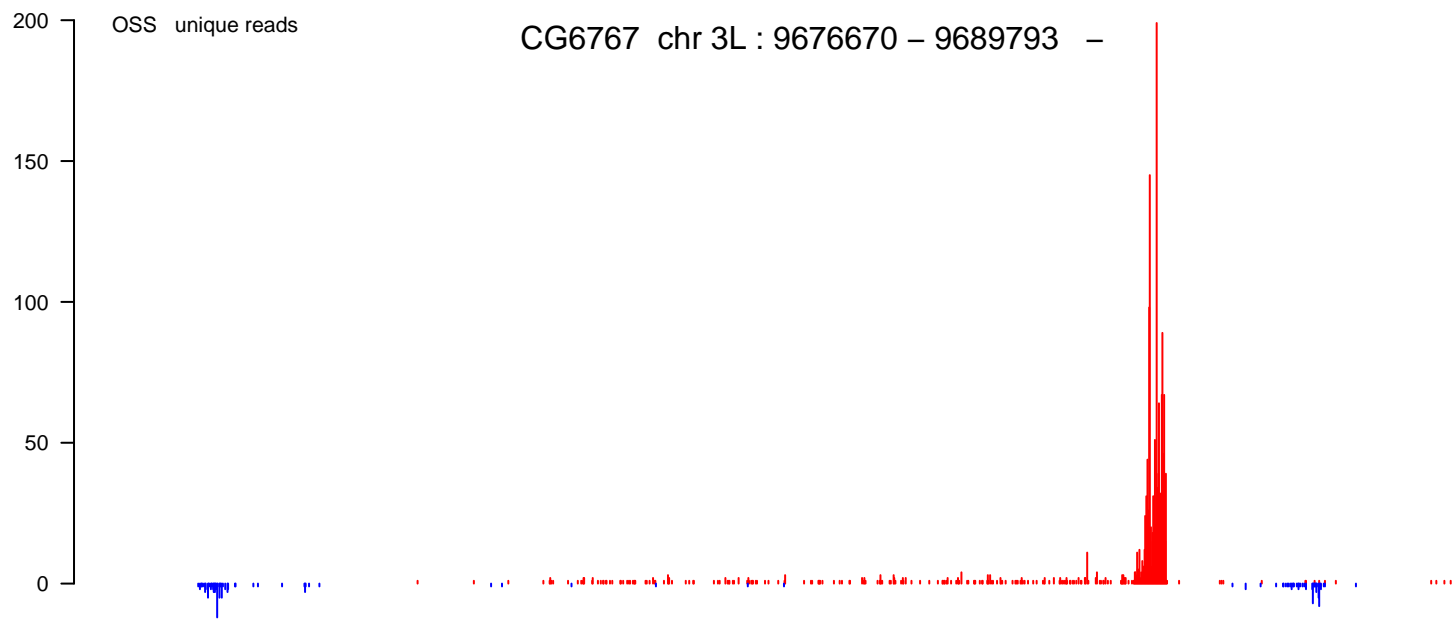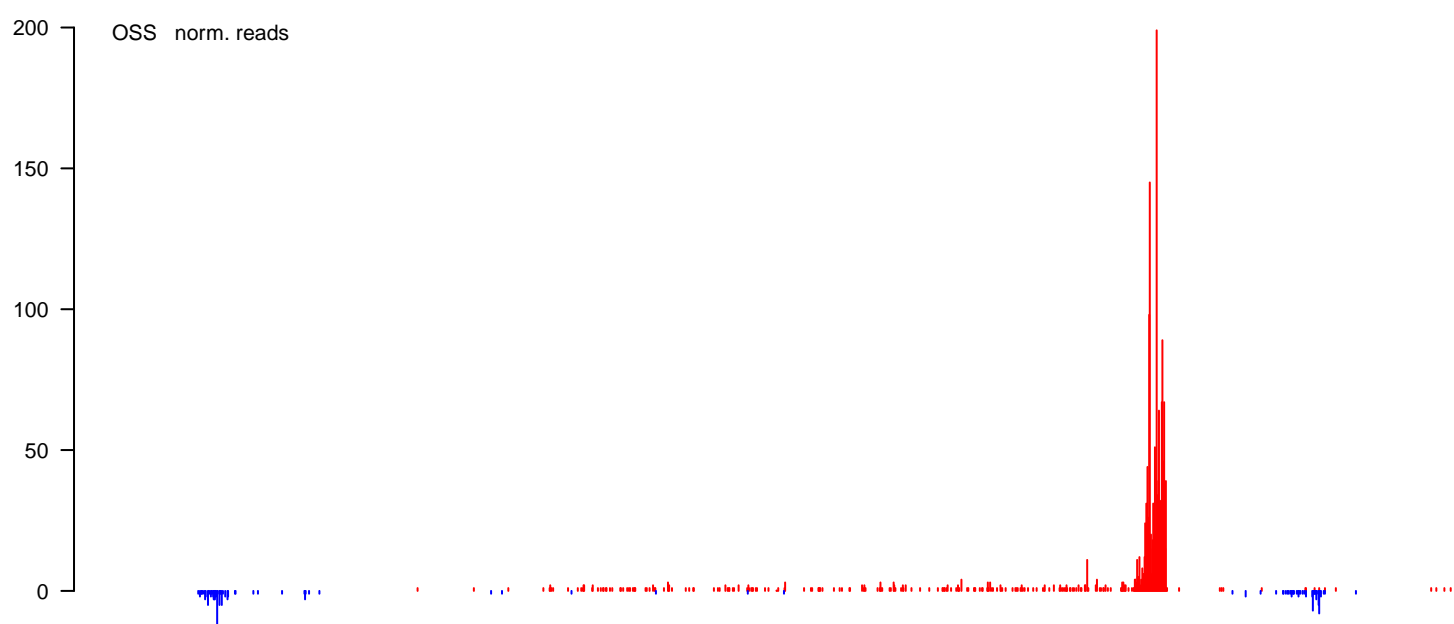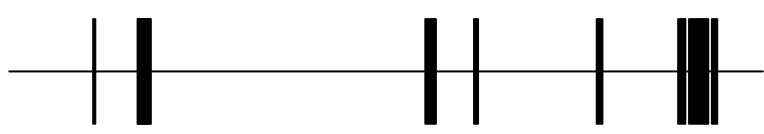



Smr chr X : 12578182 – 12636476 –

OSS unique reads

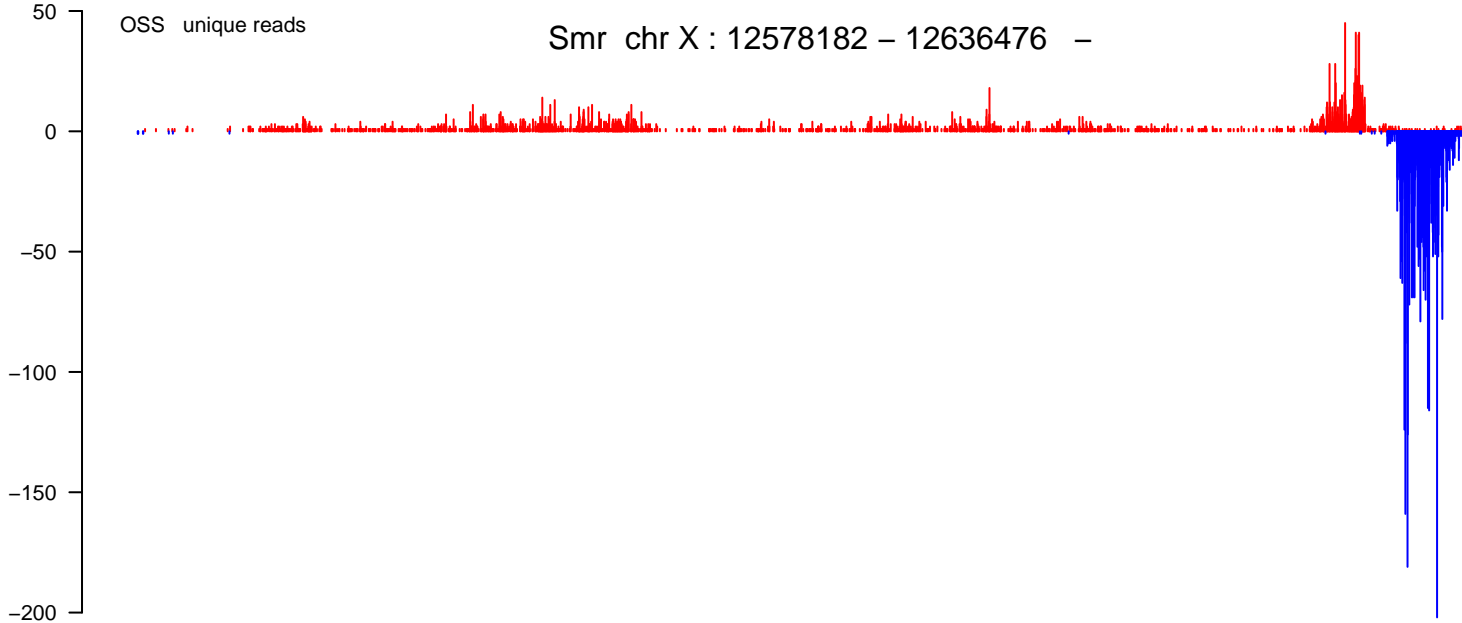

OSS norm. reads

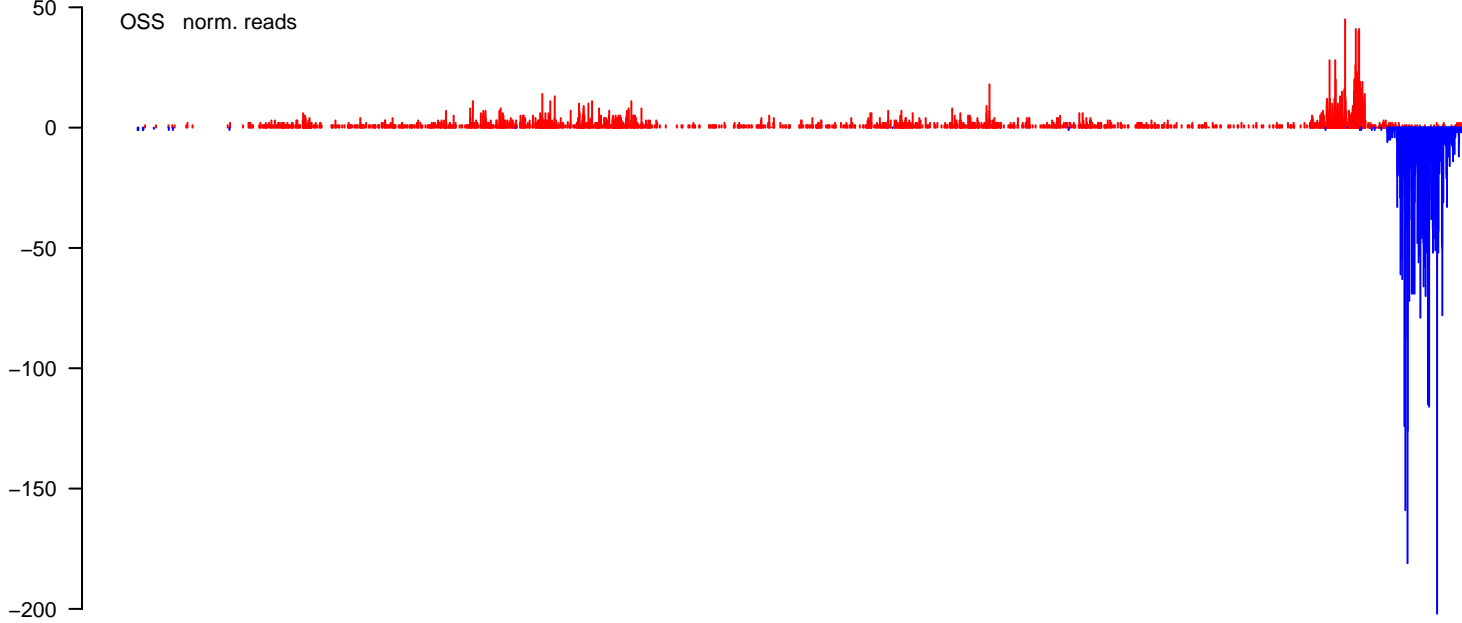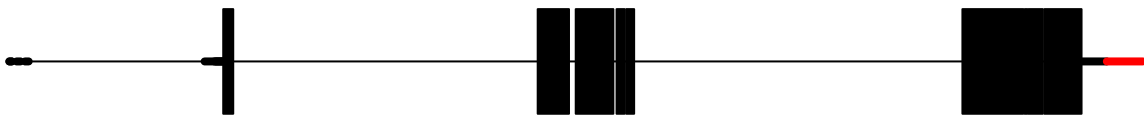

OSS unique reads

CG9339 chr 2L : 20871329 – 20918928 –

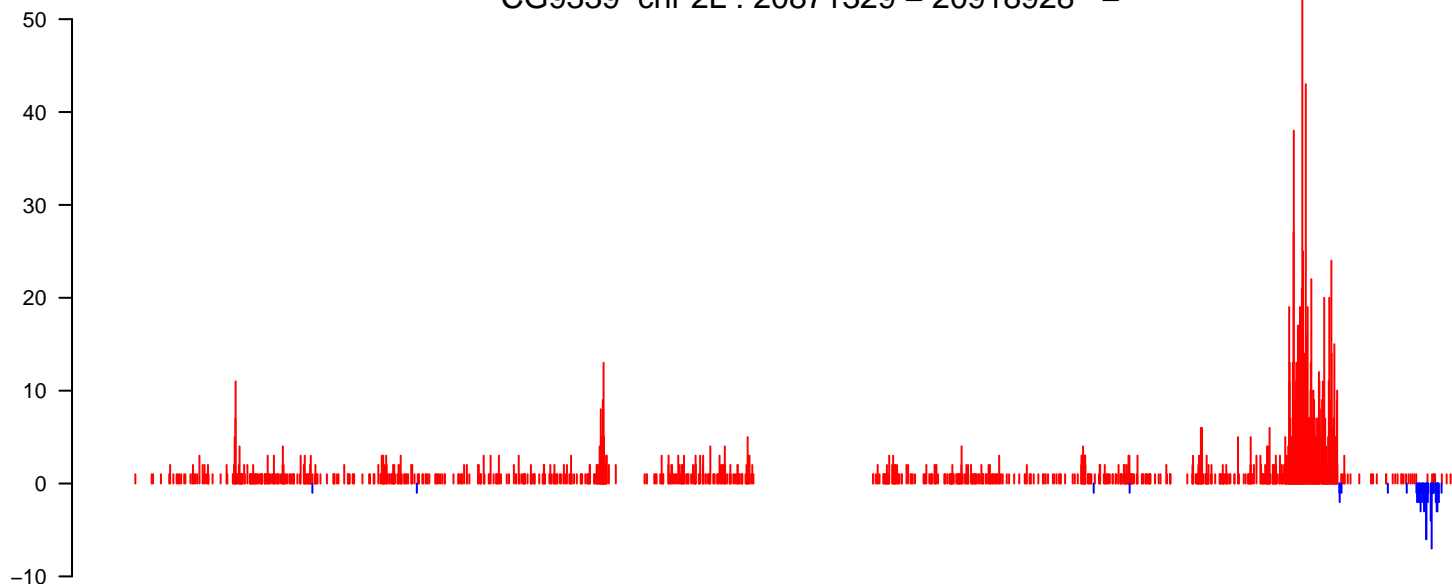

OSS norm. reads

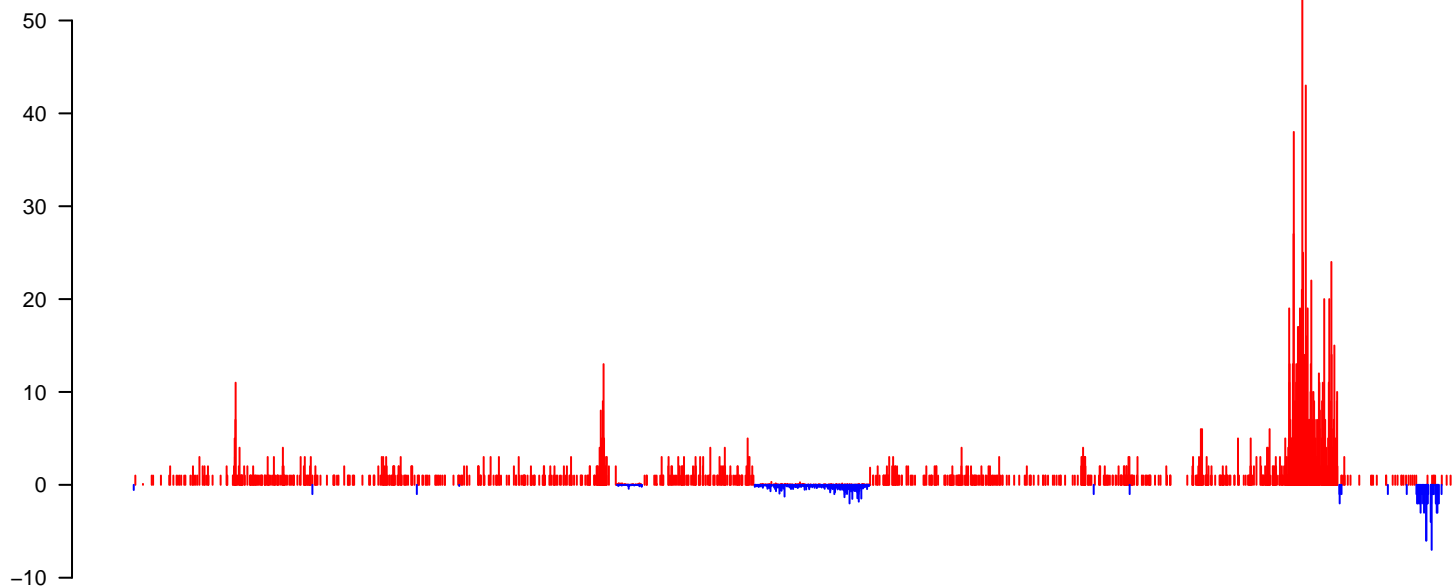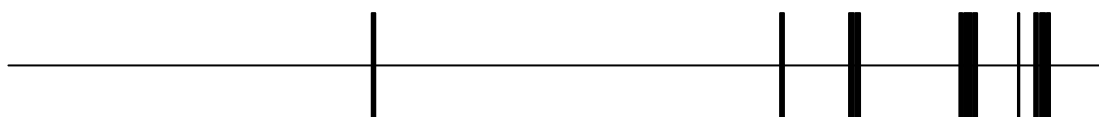

CG9339 2L – 20871329 20918928

CG3523 chr 2L : 3056615 – 3068184 +

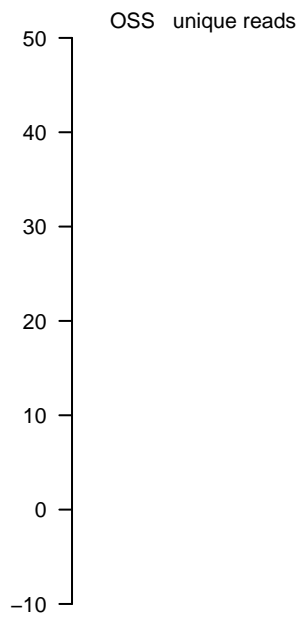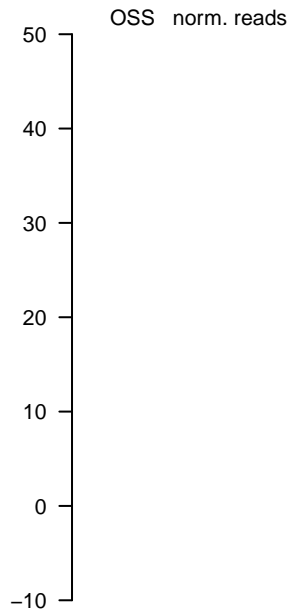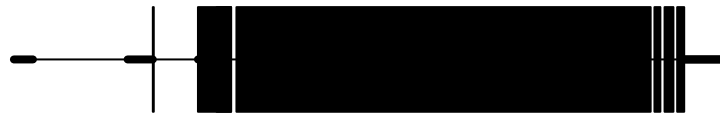

CG3523 2L + 3056615 3068184

OSS unique reads

spen chr 2L : 159034 – 203279 +

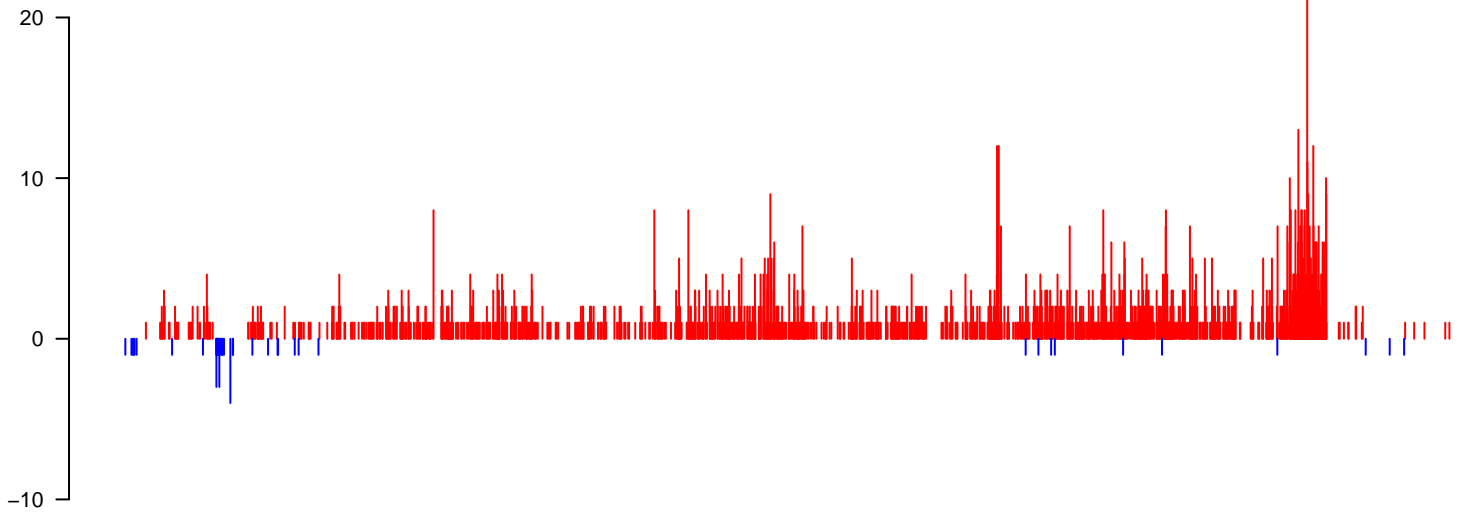

OSS norm. reads

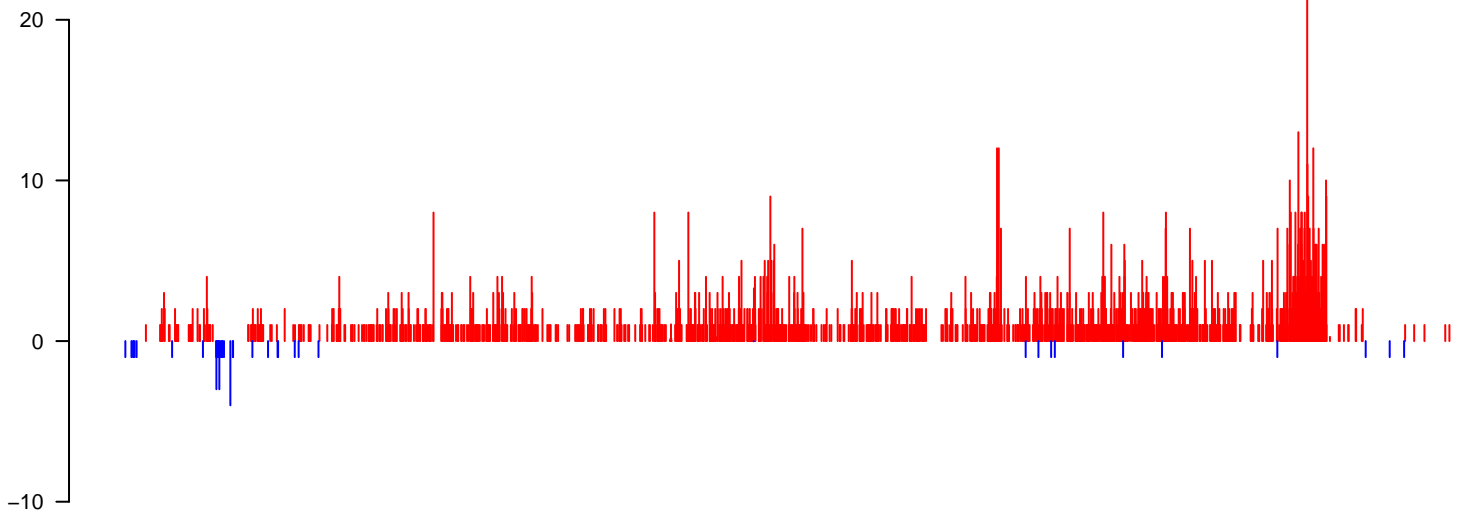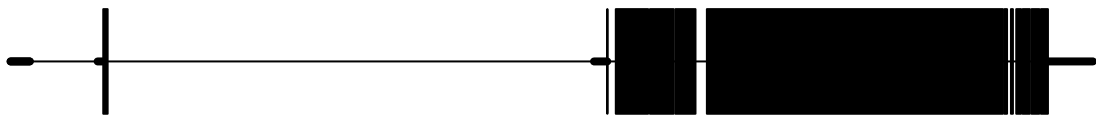

spen 2L + 159034 203279

OSS unique reads

CG17838 chr 3R : 16582451 – 16635709 +

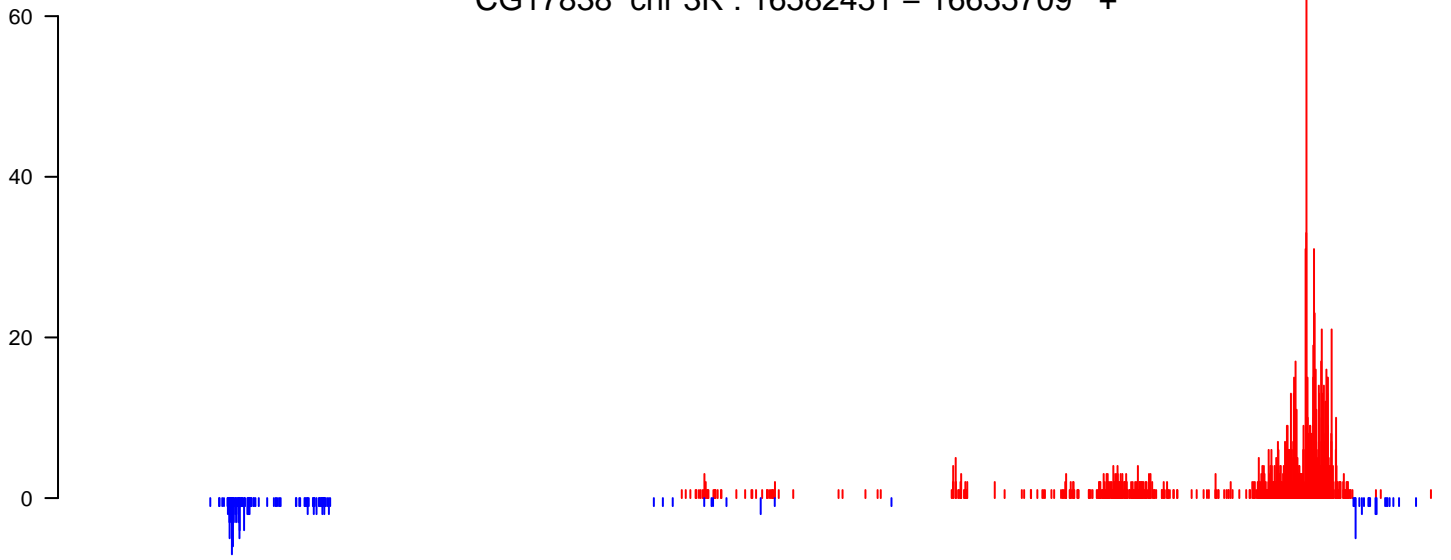

OSS norm. reads

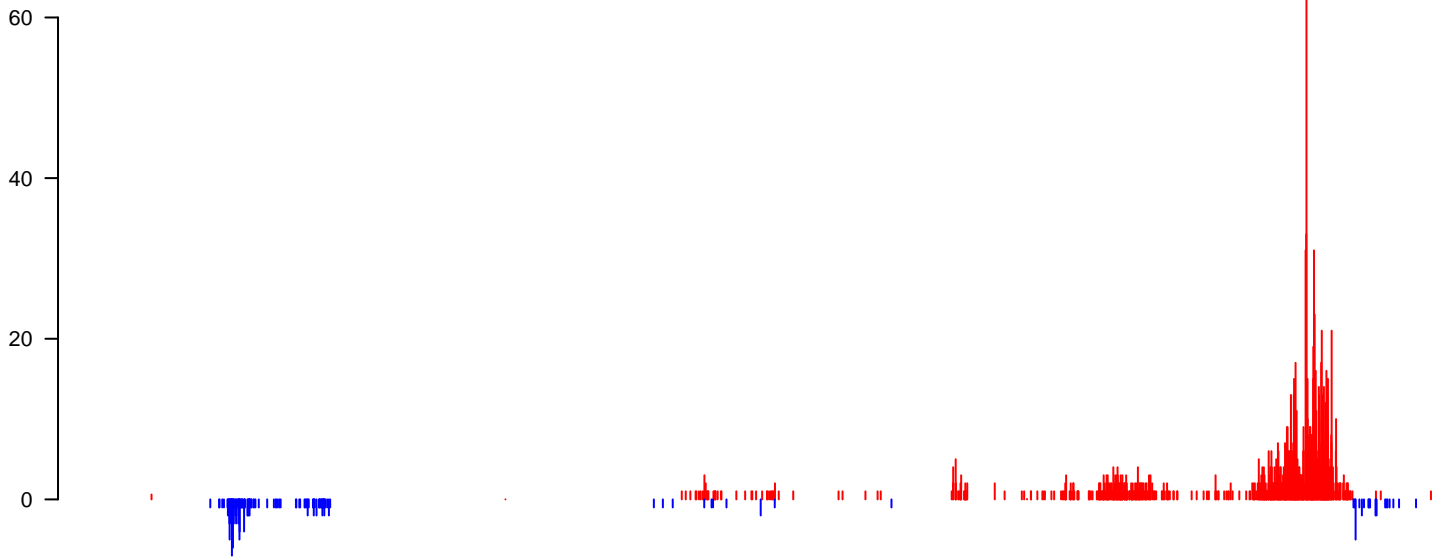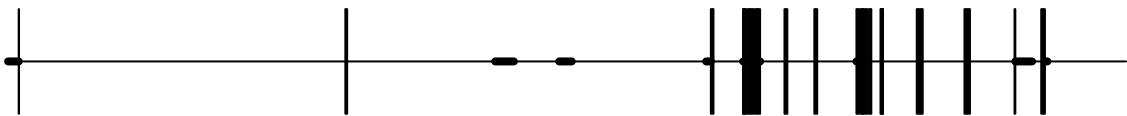

CG17838 3R + 16582451 16635709

CG9132 chr X : 16690921 – 16696233 –

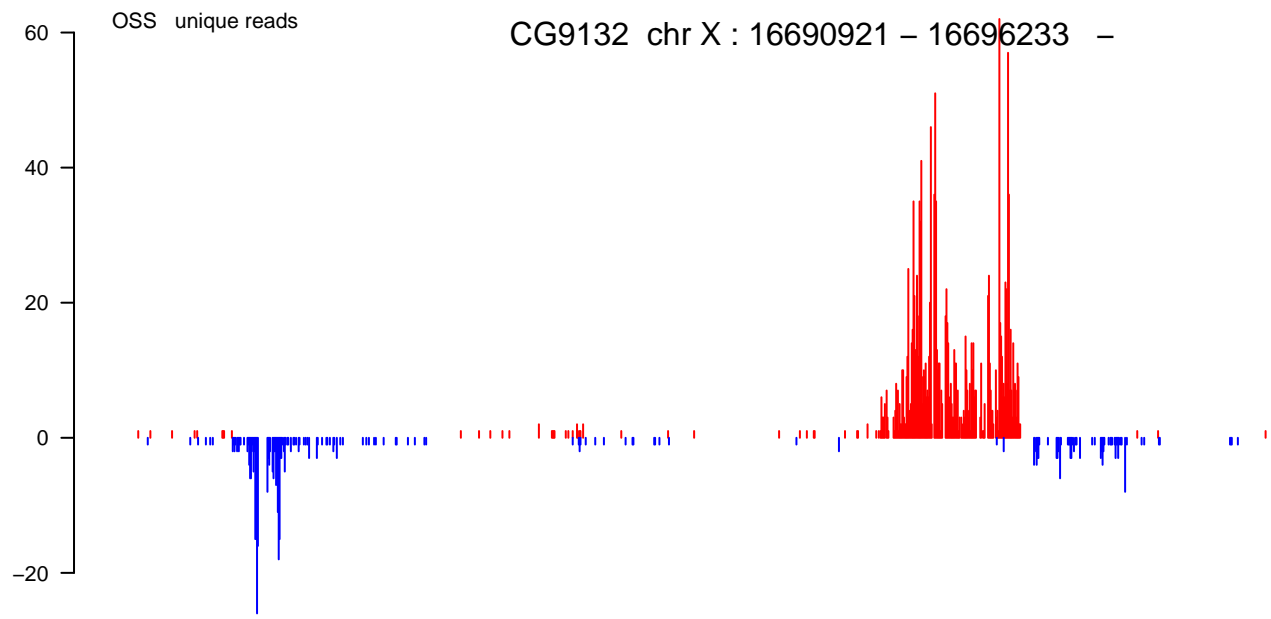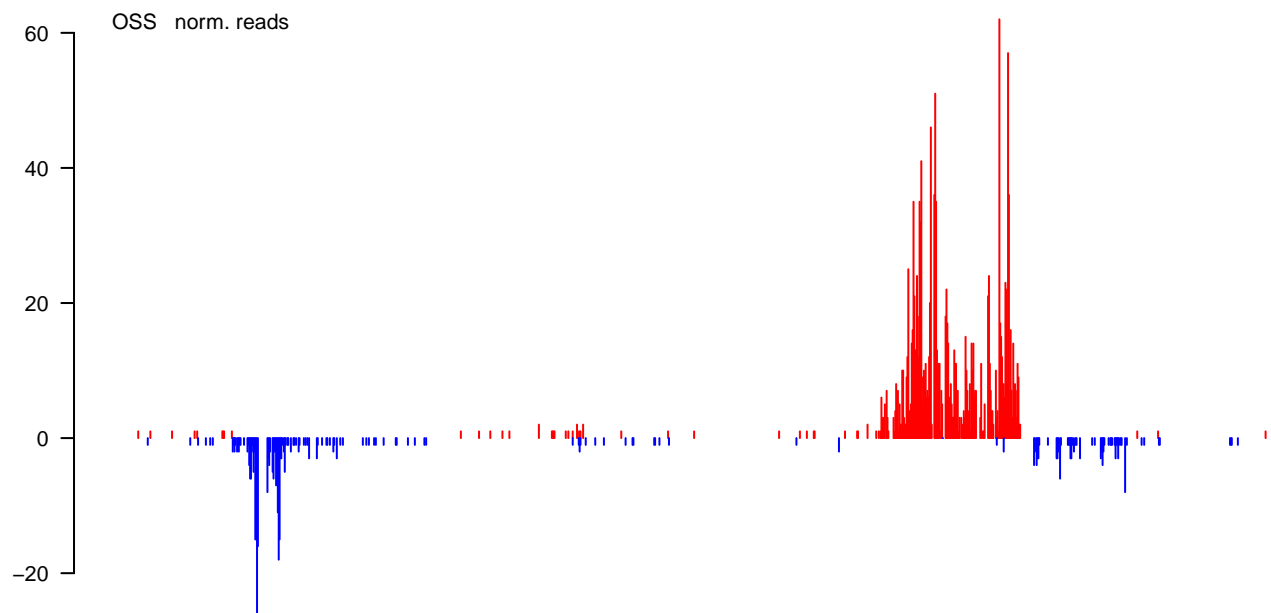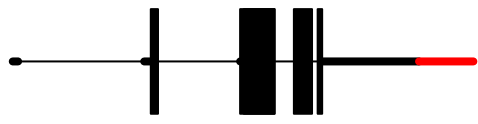

OSS unique reads

fs(1)Yb chr X : 2614501 – 2620092 +

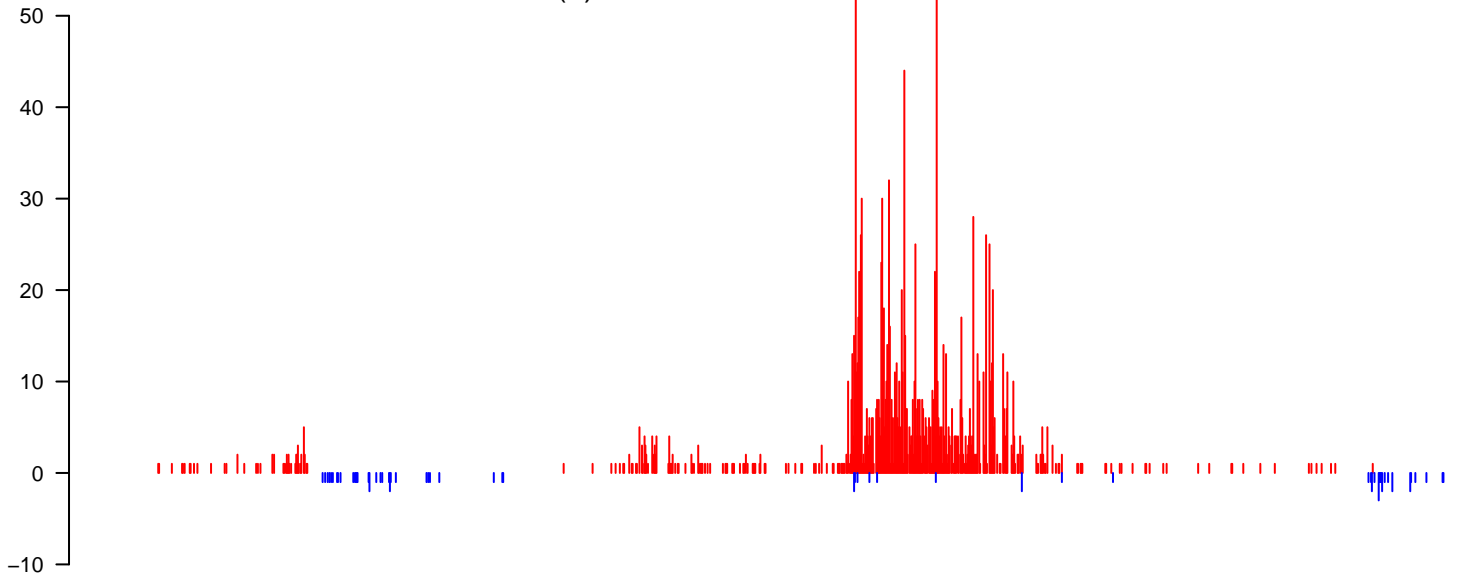

OSS norm. reads

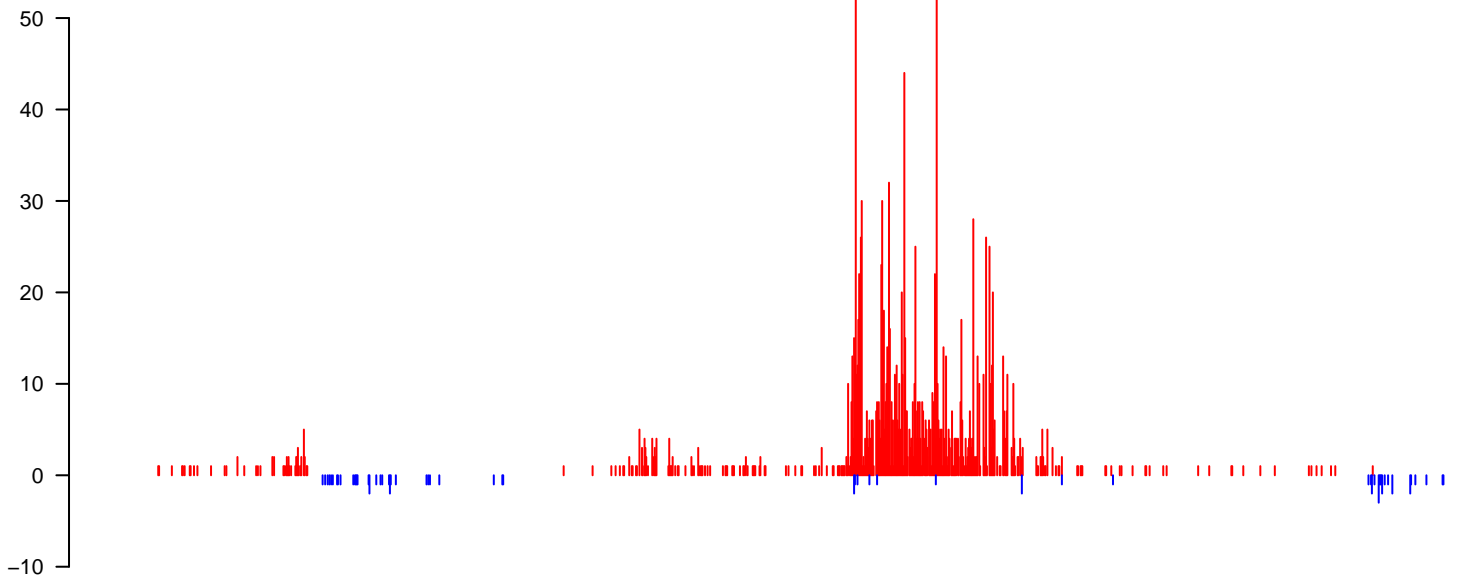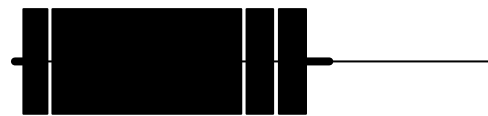

fs(1)Yb X + 2614501 2620092

ImpL2 chr 3L : 4224025 – 4236147 –

OSS unique reads

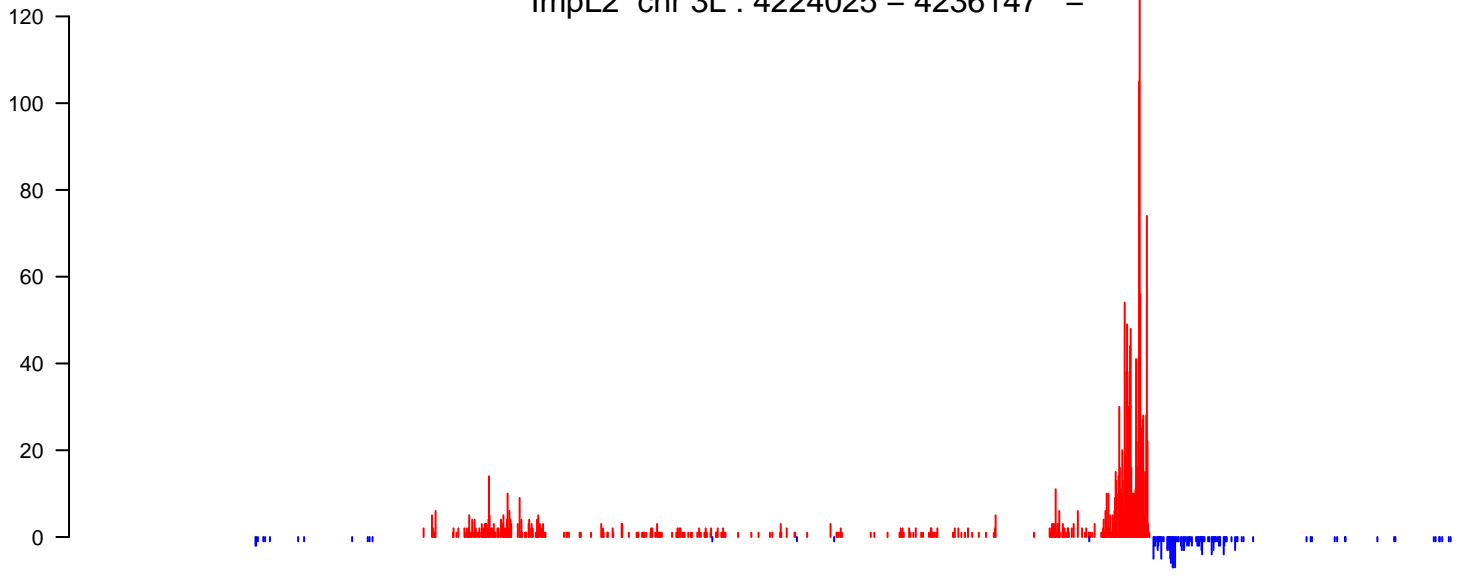

OSS norm. reads

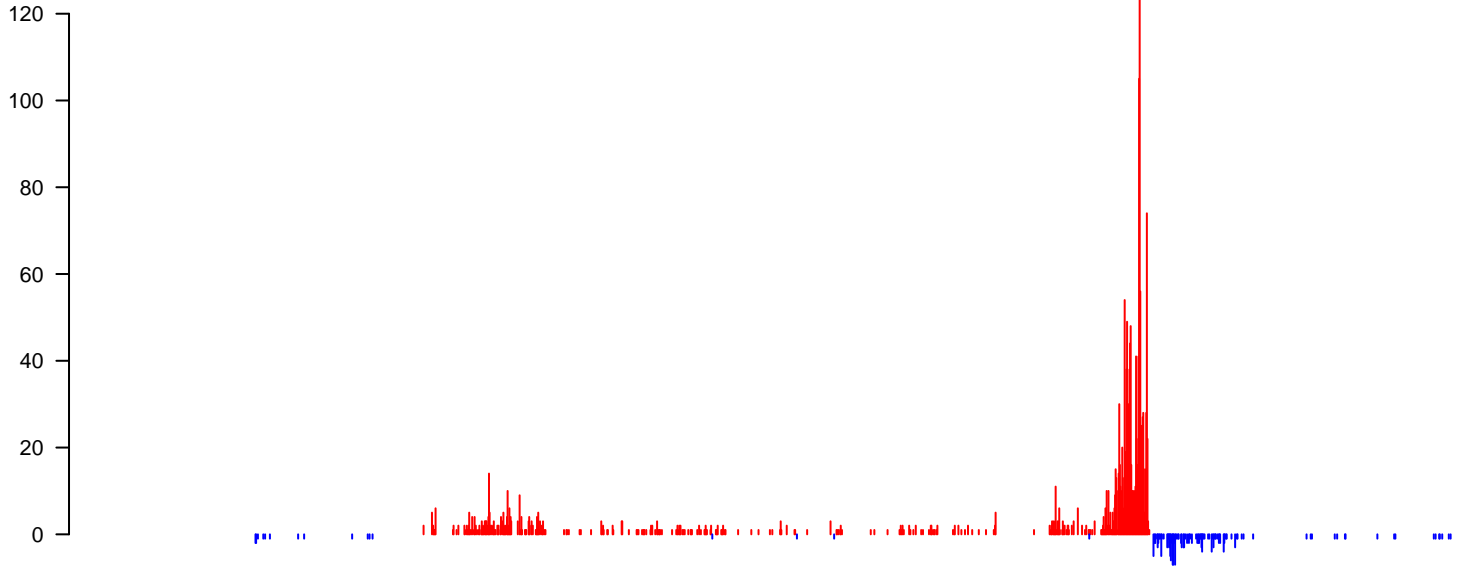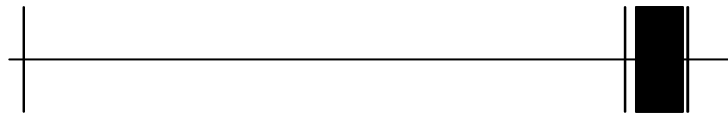



OSS unique reads

tud chr 2R : 17070937 – 17080417 +

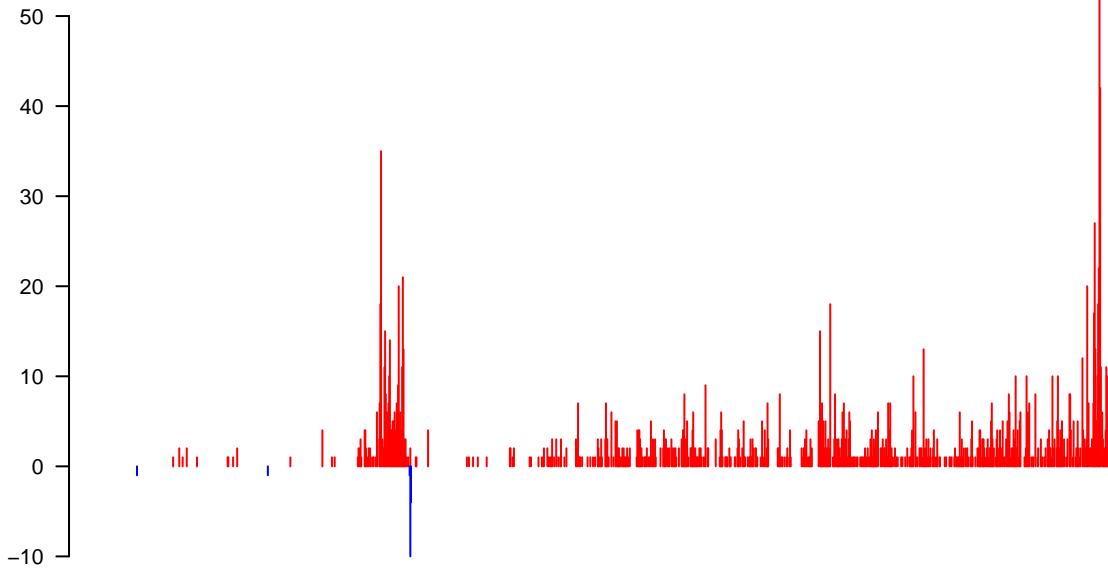

OSS norm. reads

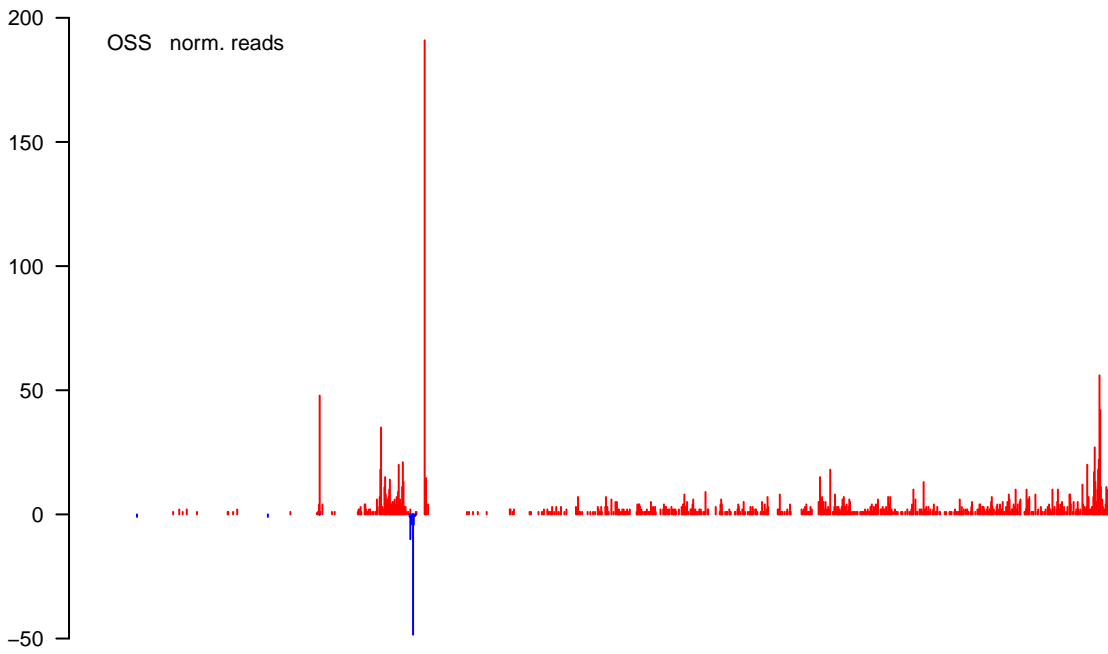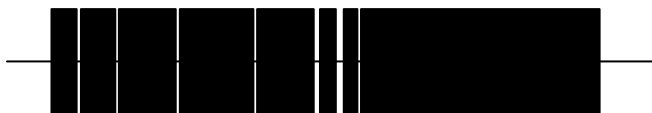

tud 2R + 17070937 17080417

CG3249 chr X : 5306408 – 5314896

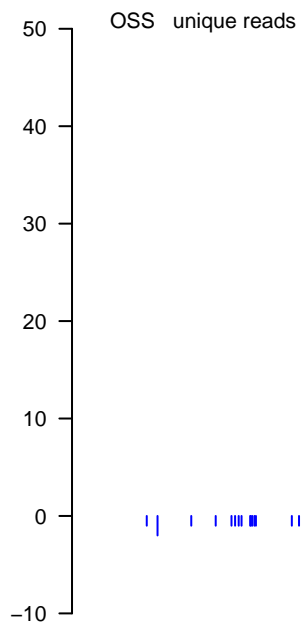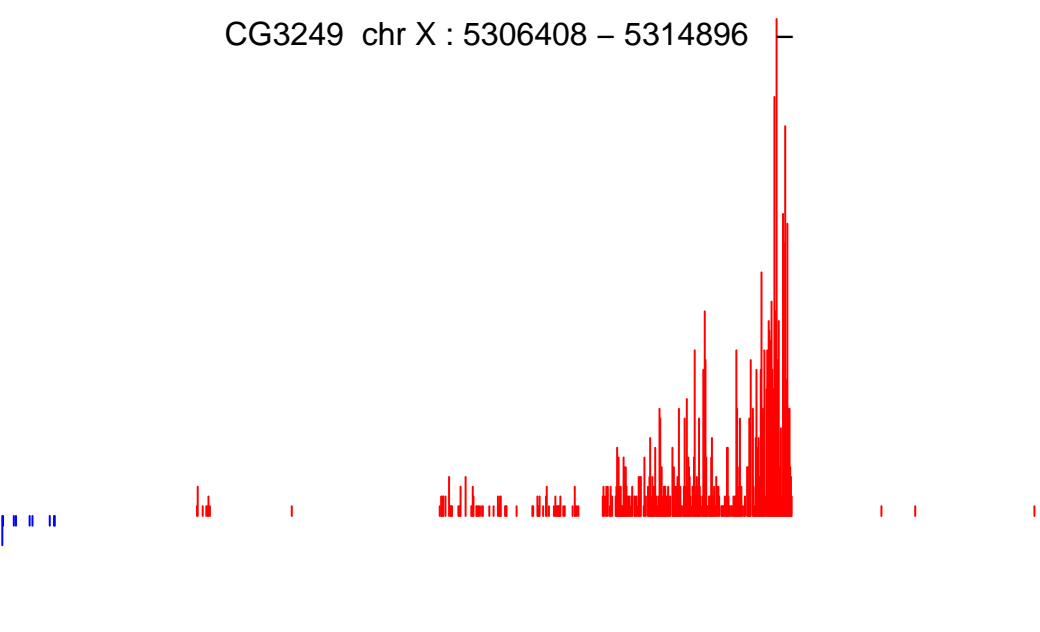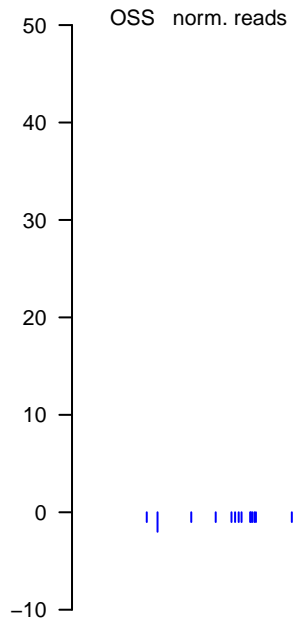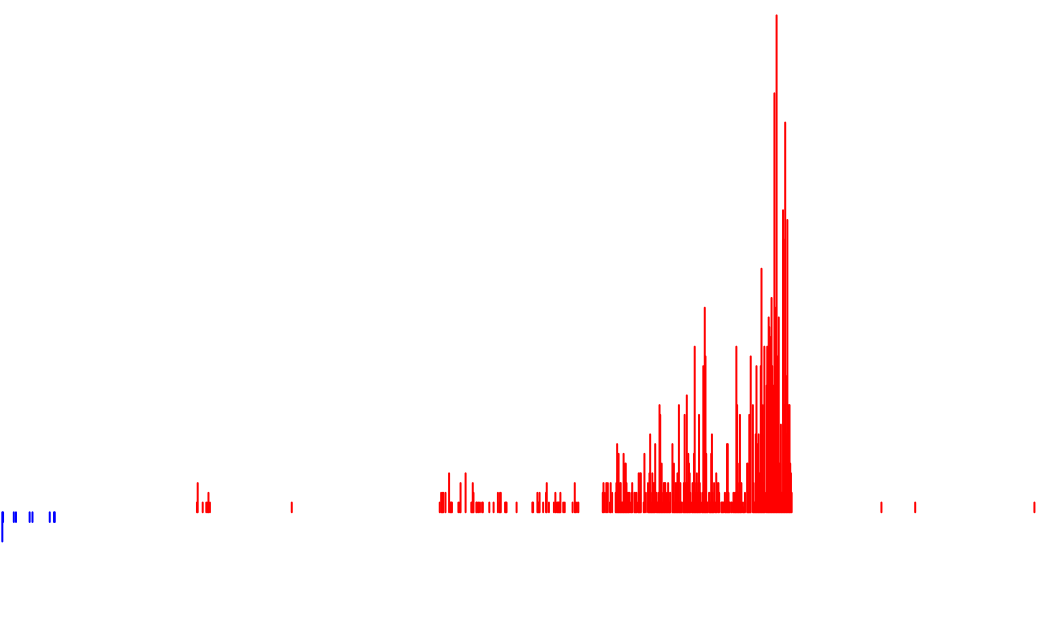

Fas1 chr 3R : 12450948 – 12465498 +

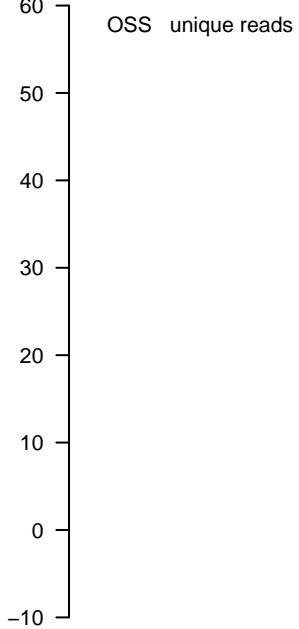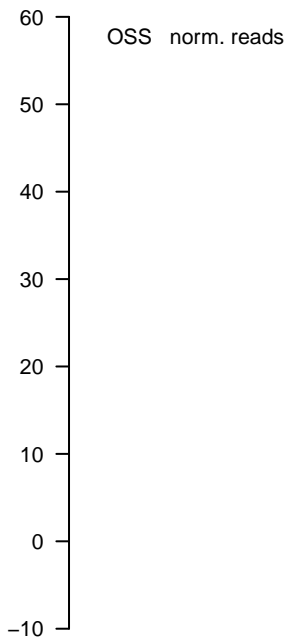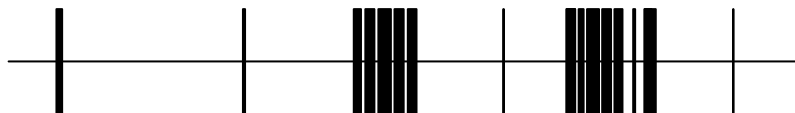

OSS unique reads

RhoGAP92B chr 3R : 15730861 – 15740022 +

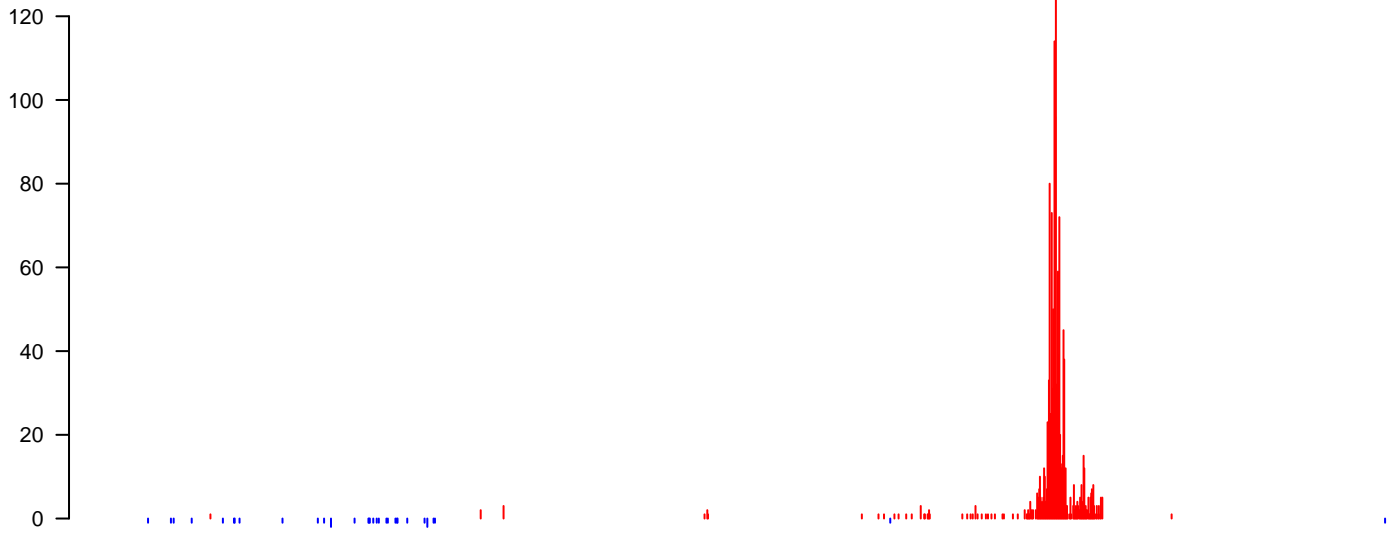

OSS norm. reads

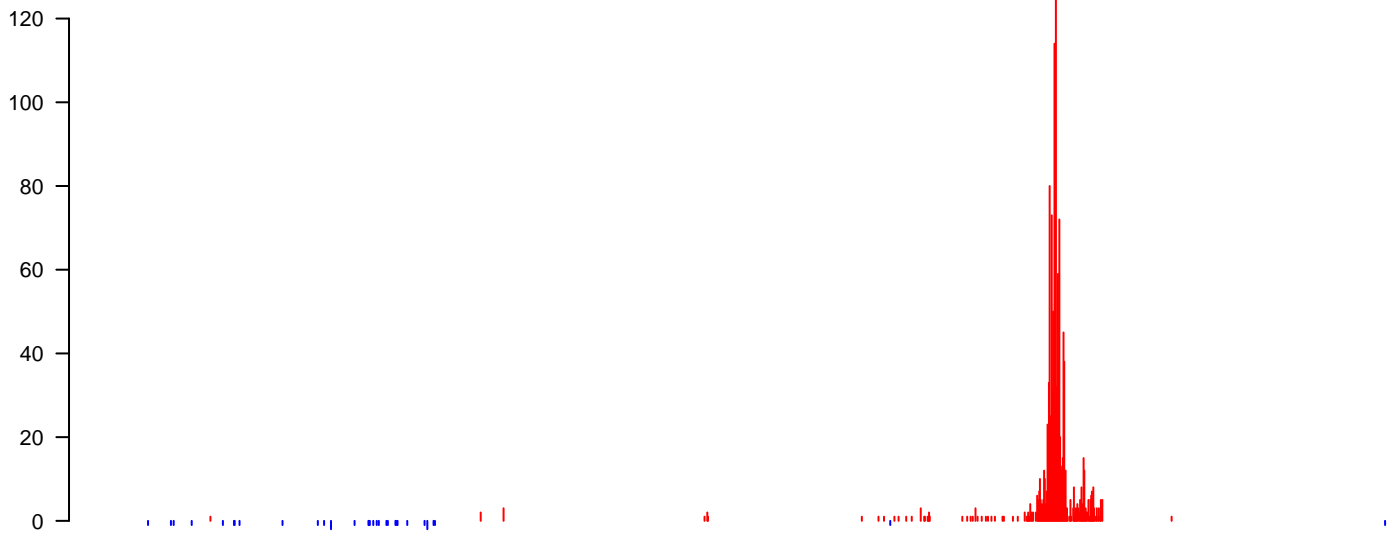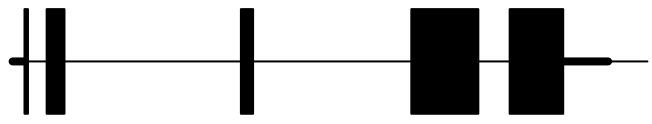

RhoGAP92B 3R + 15730861 15740022

OSS unique reads

CG6490 chr 3R : 22295795 – 22303805 –

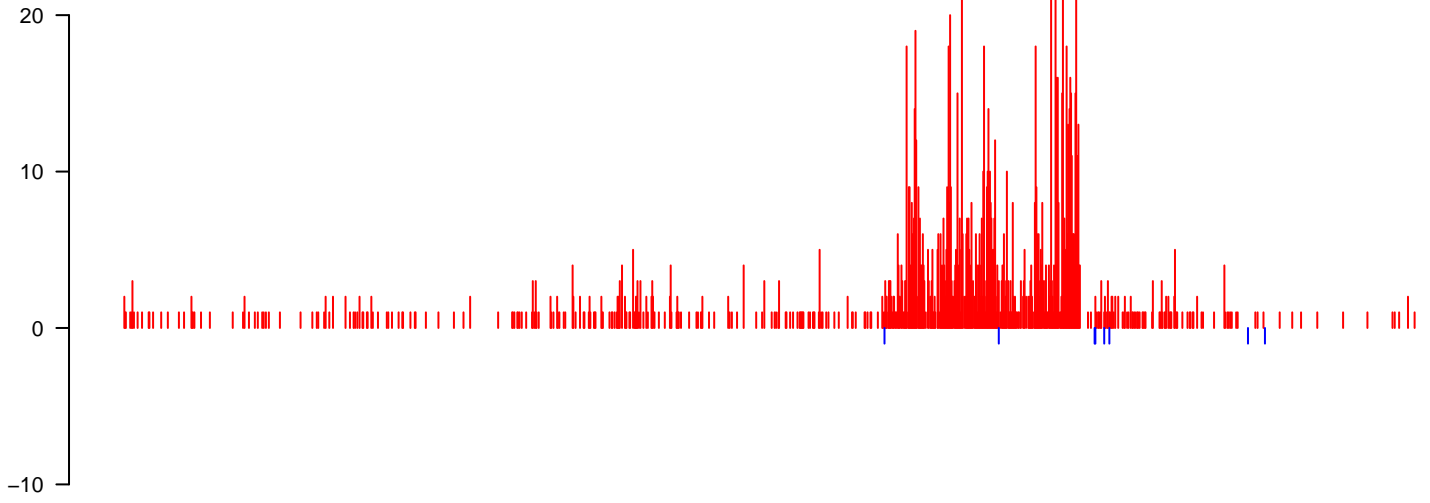

OSS norm. reads

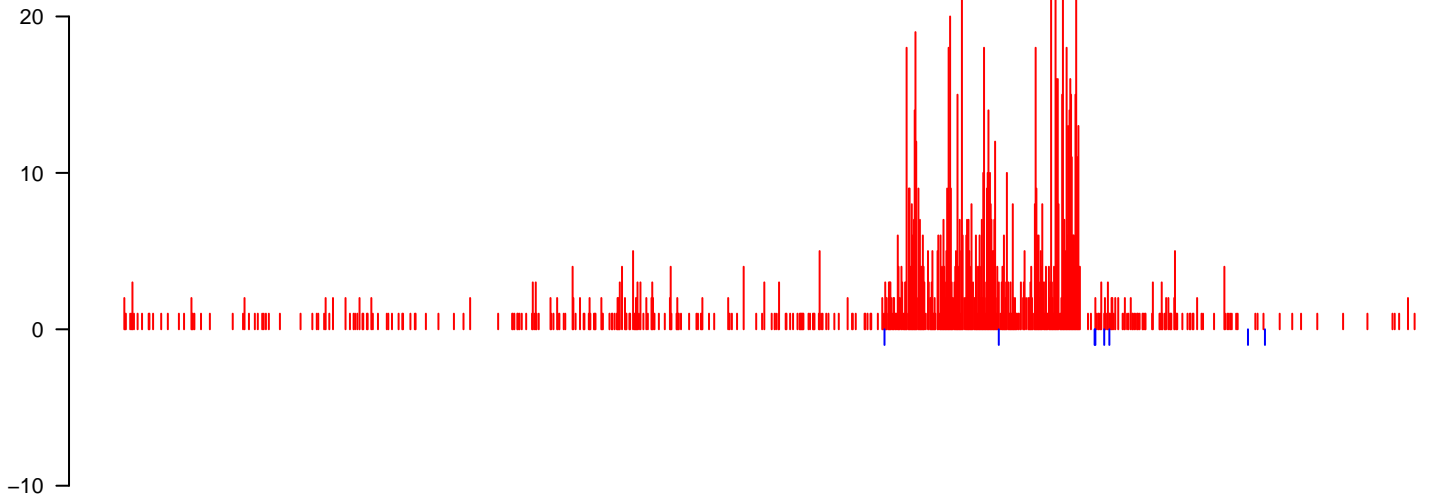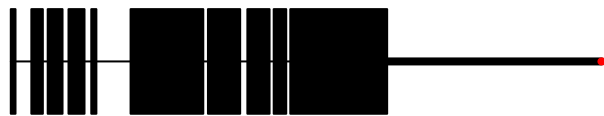

CG6490 3R – 22295795 22303805

OSS unique reads

CG17912 chr 2L : 16743404 – 16753489 +

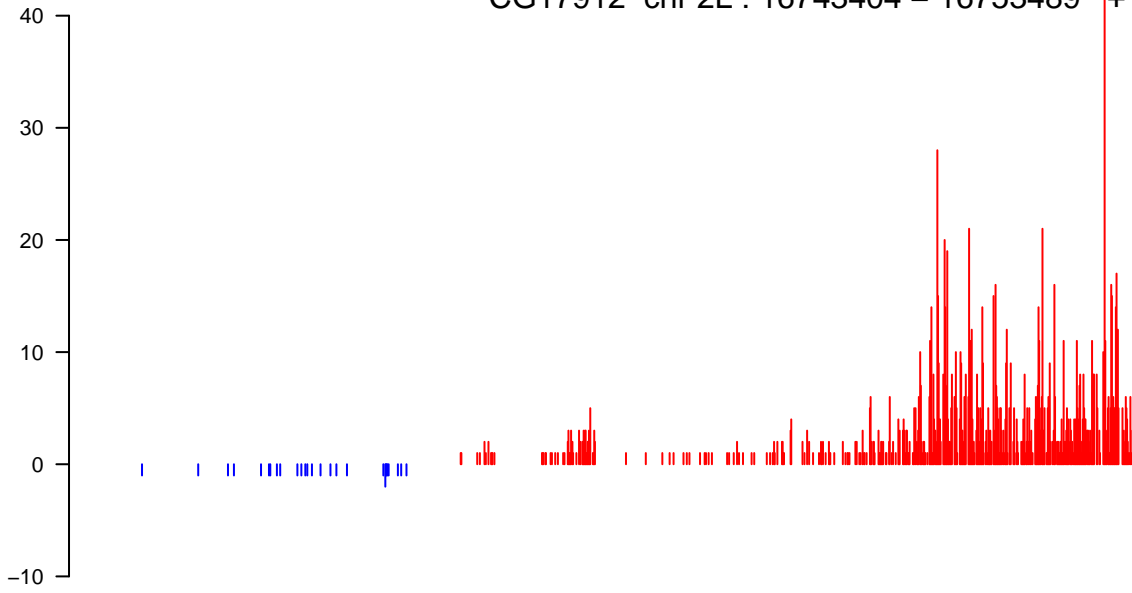

OSS norm. reads

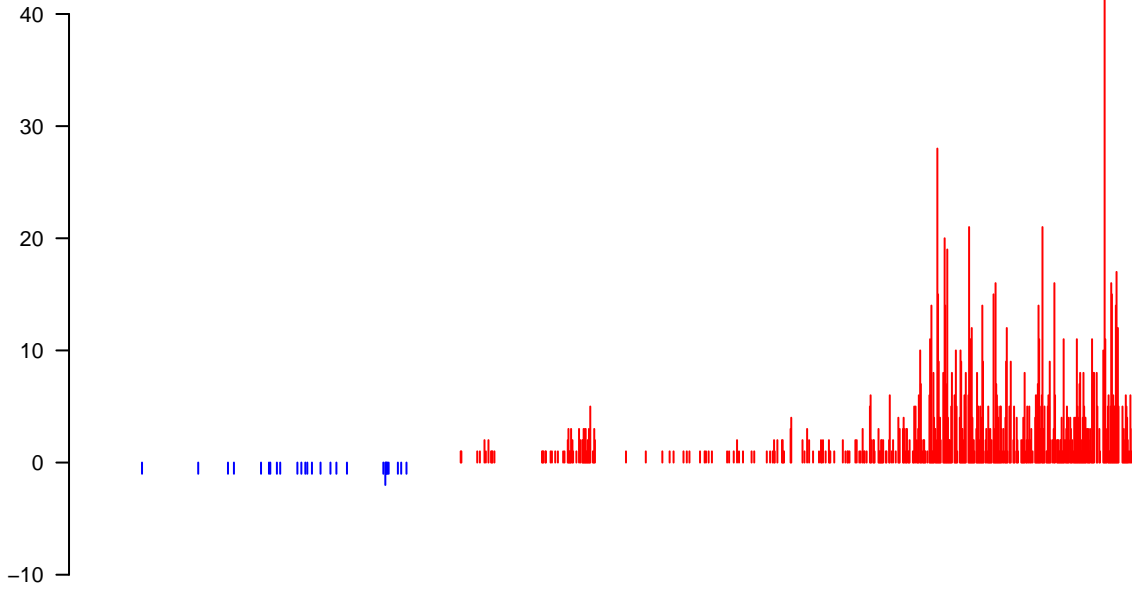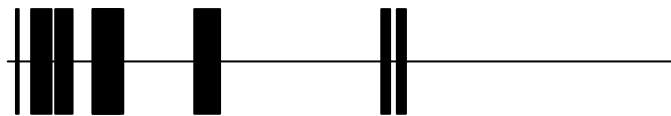

CG17912 2L + 16743404 16753489

exd chr X : 15886520 - 15890555 +

OSS unique reads

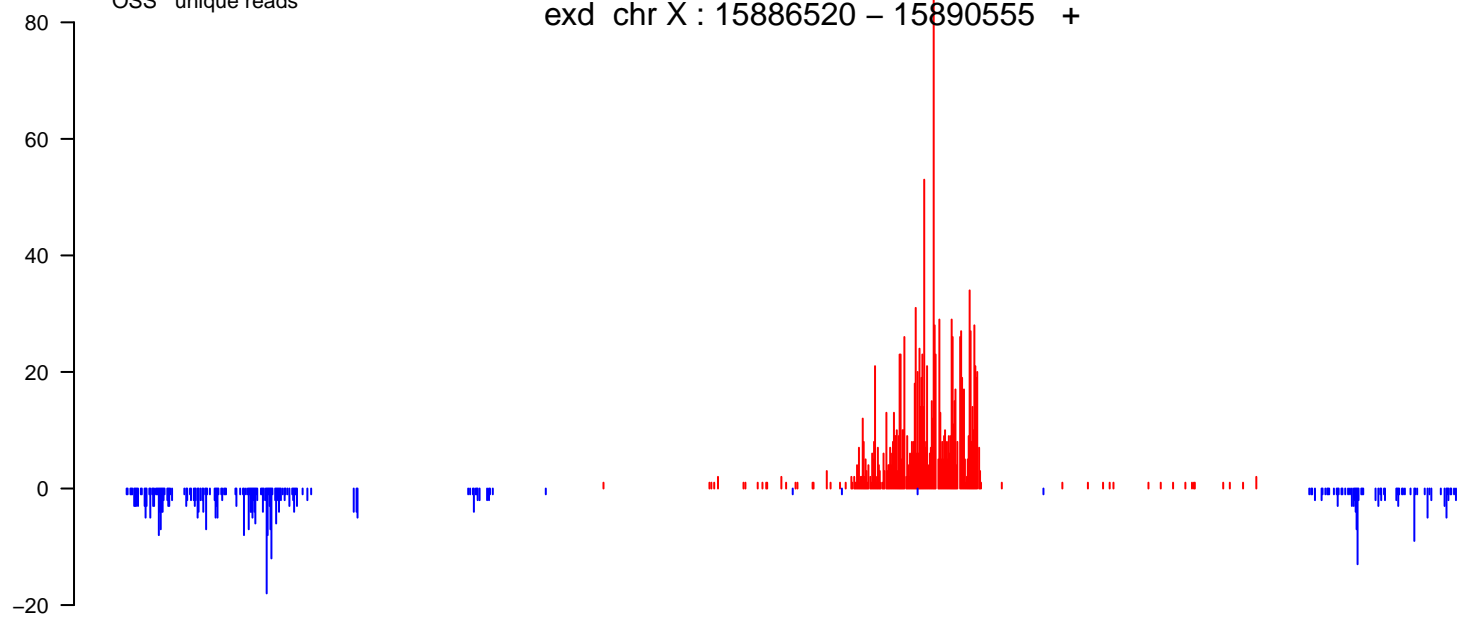

OSS norm. reads

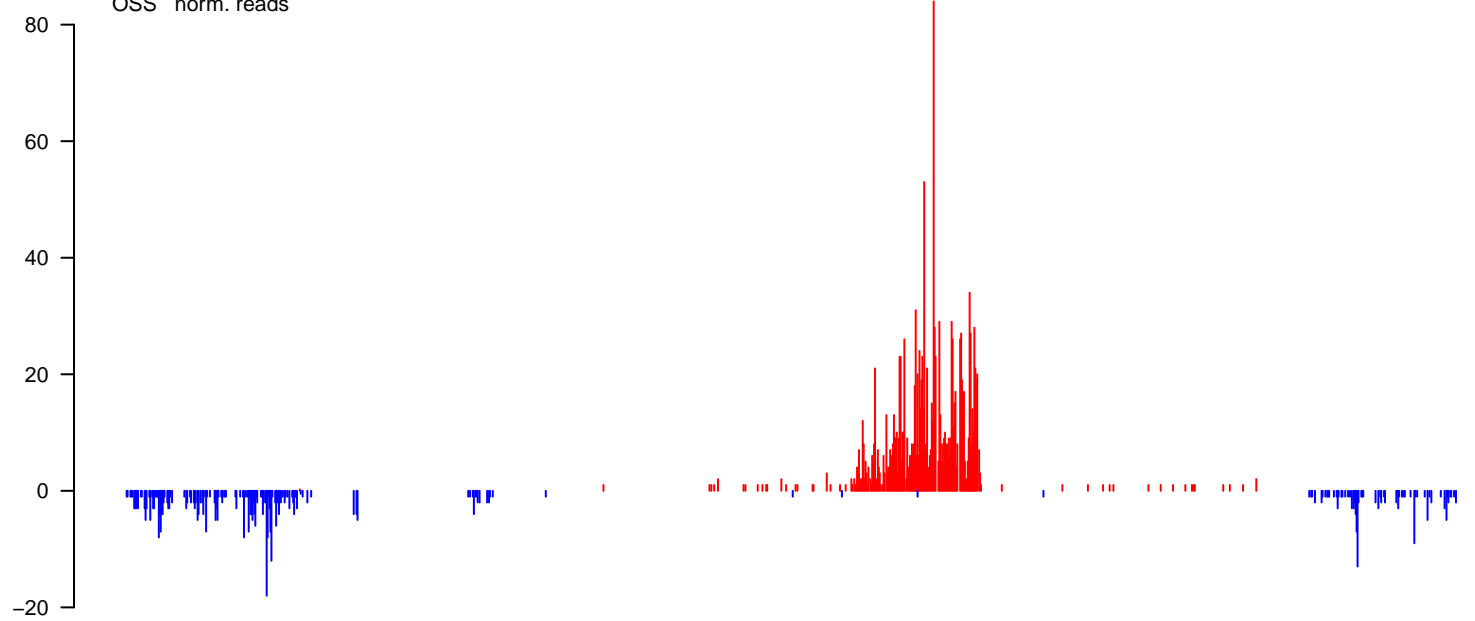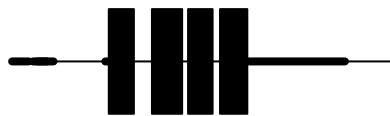

exd X + 15886520 15890555

plx chr 3R : 1532462 – 1538566 +

OSS unique reads

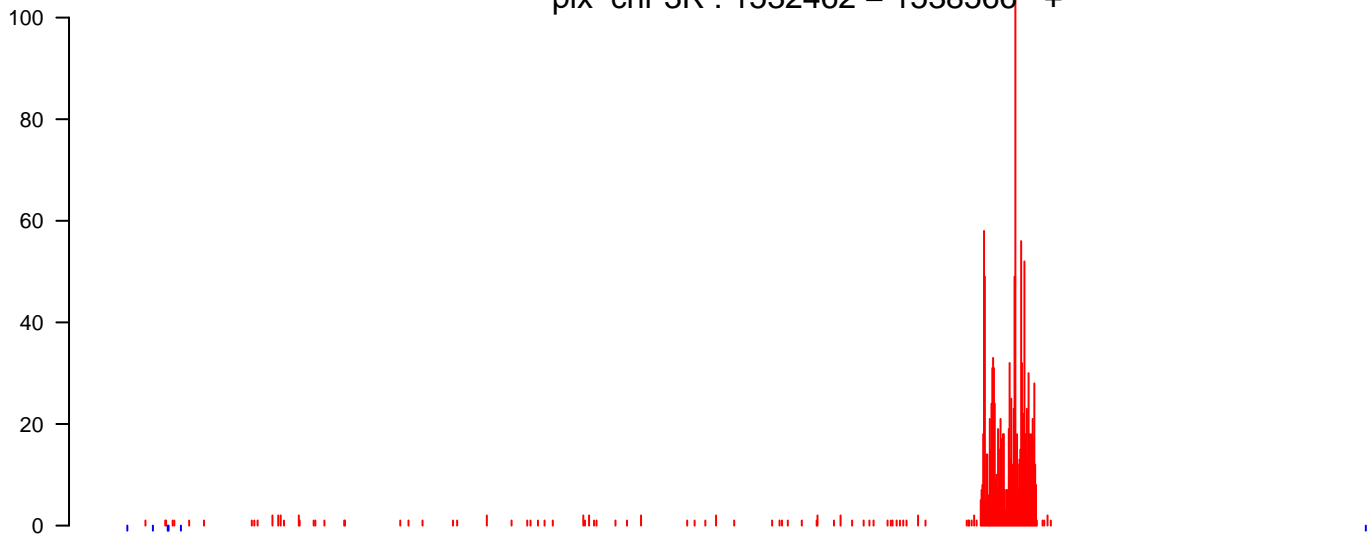

OSS norm. reads

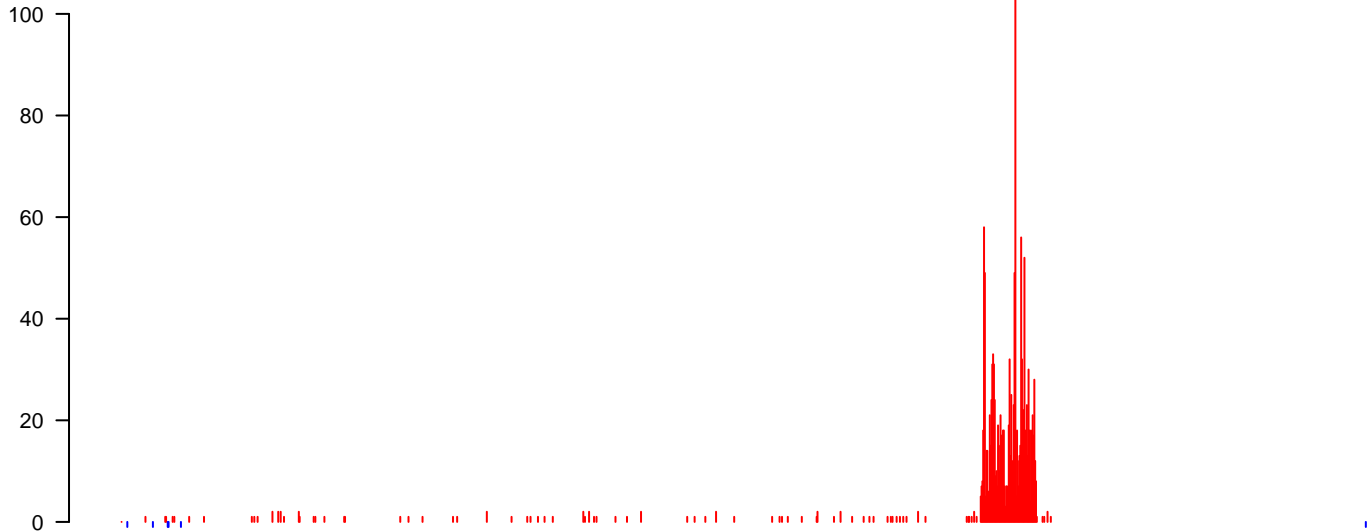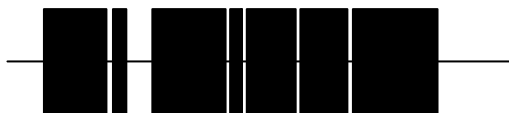

plx 3R + 1532462 1538566



Ef1alpha48D chr 2R : 7779597 – 7783123 +

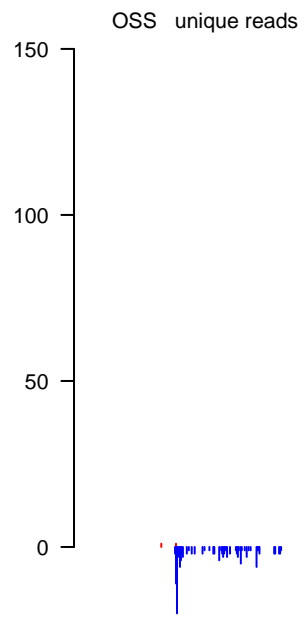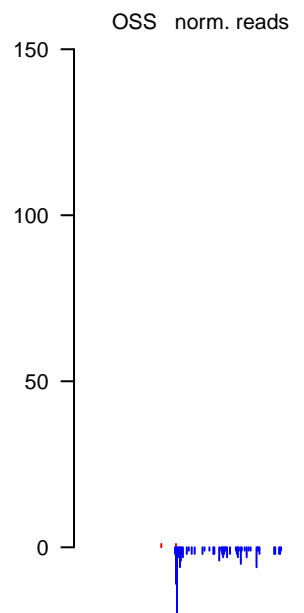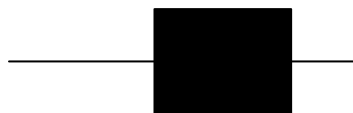

Ef1alpha48D 2R + 7779597 7783123

kek1 chr 2L : 12817001 – 12822787 –

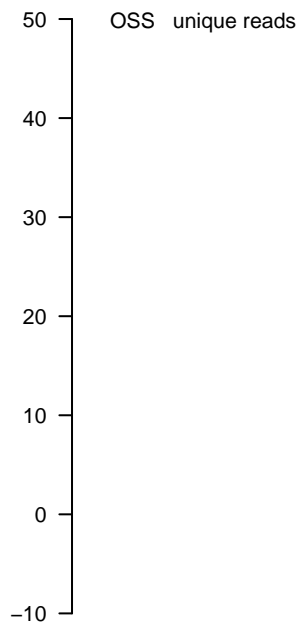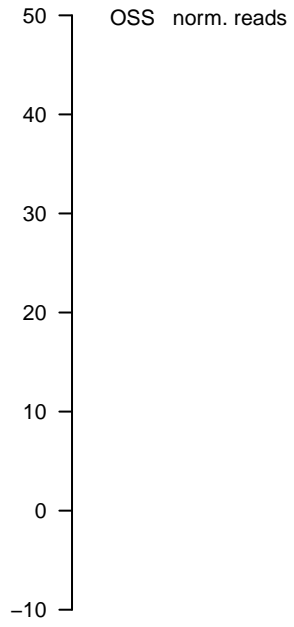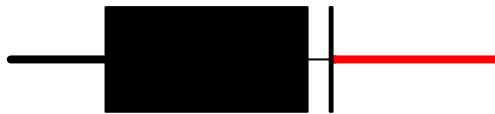

kek1 2L – 12817001 12822787

sesB chr X : 10675019 – 10680978 –

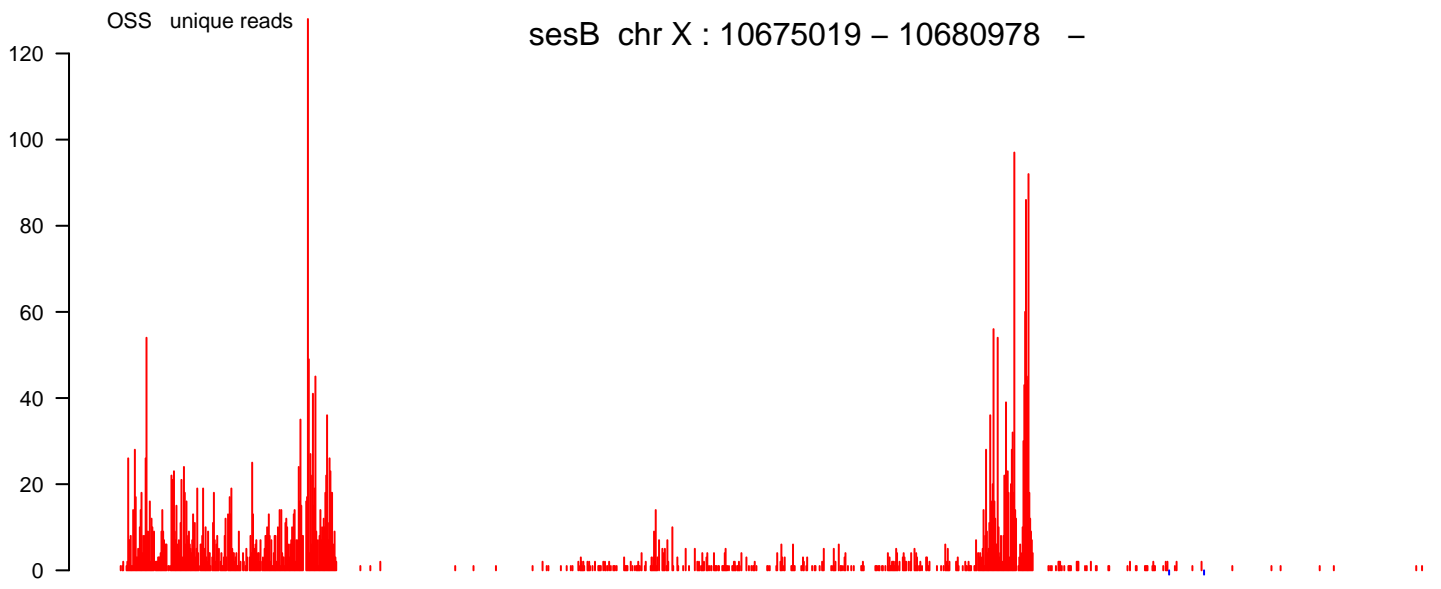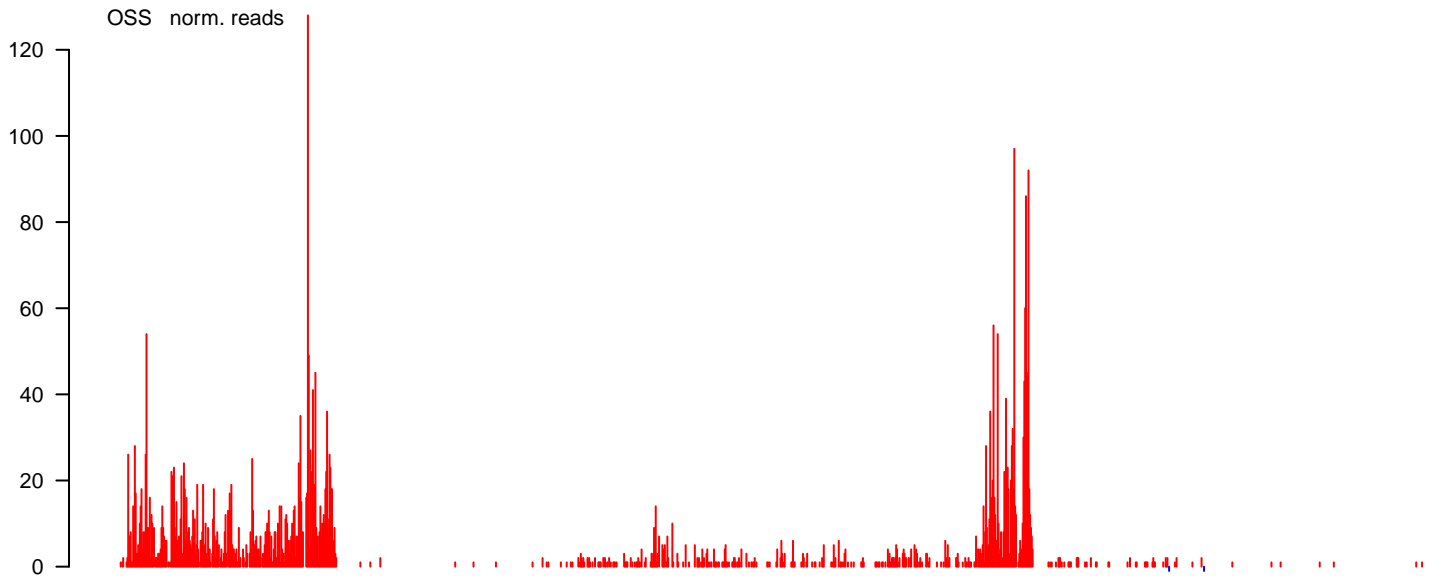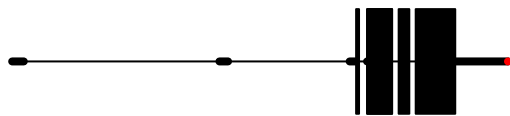

CG11505 chr-3L : 3224838 - 3235141

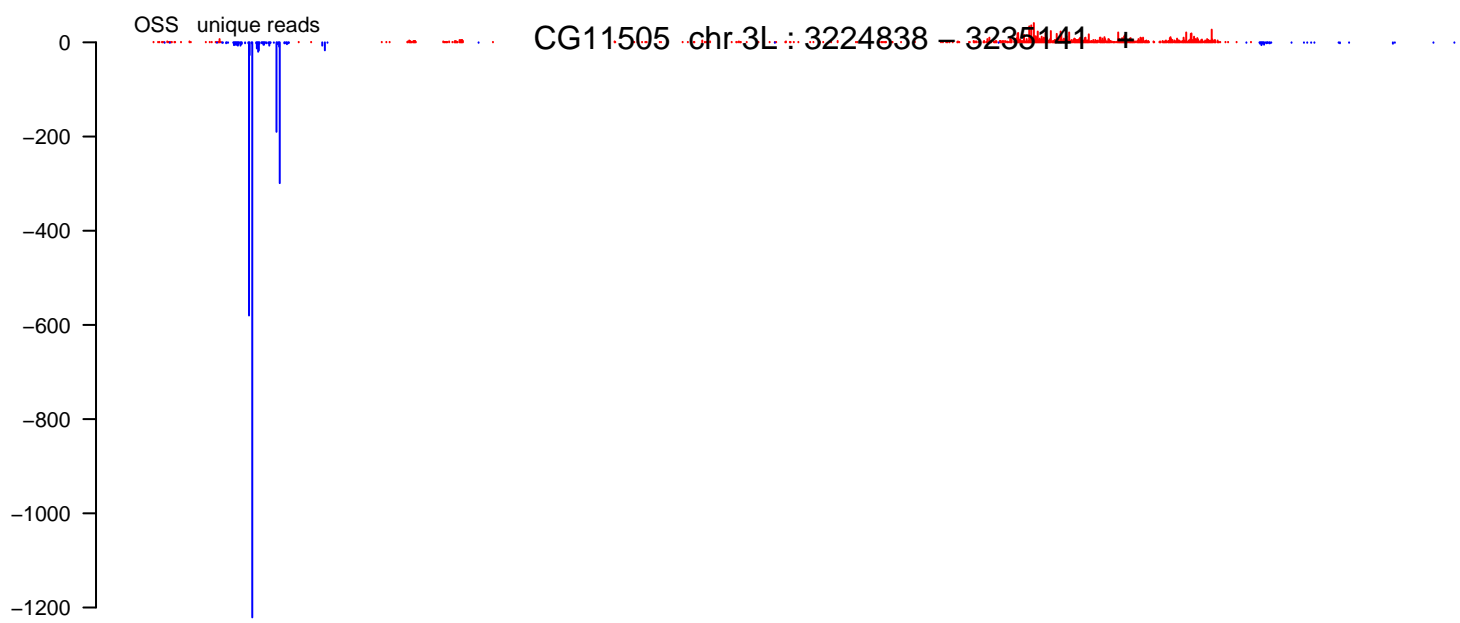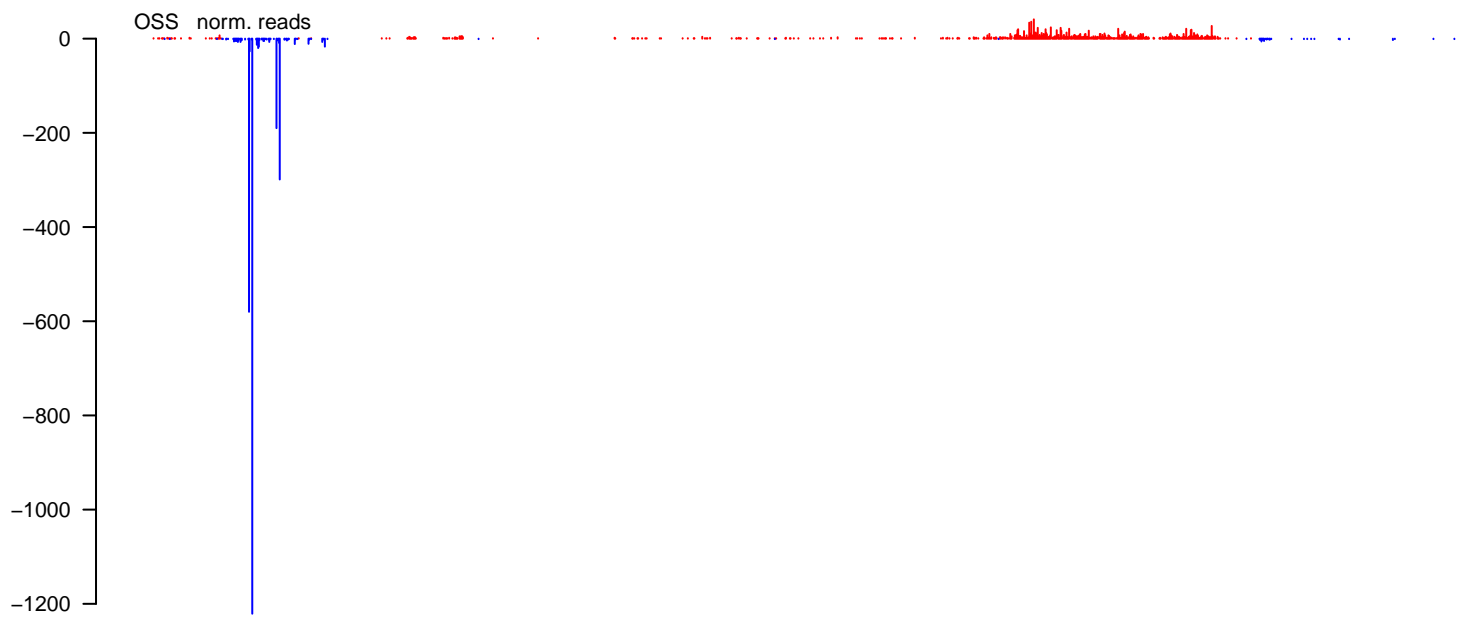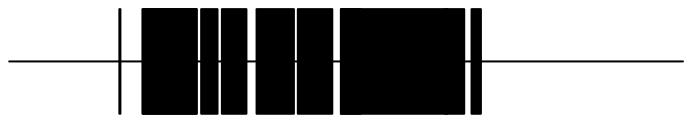

CG11505 3L + 3224838 3235141

CG33087 chr 2R : 4094023 – 4113939 +

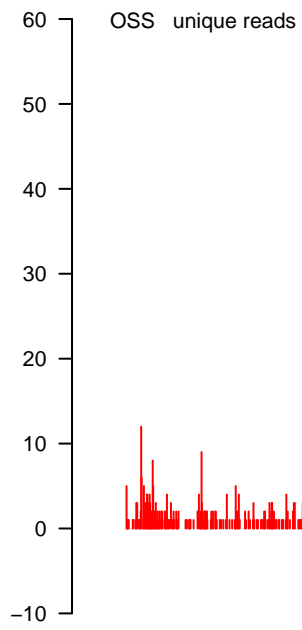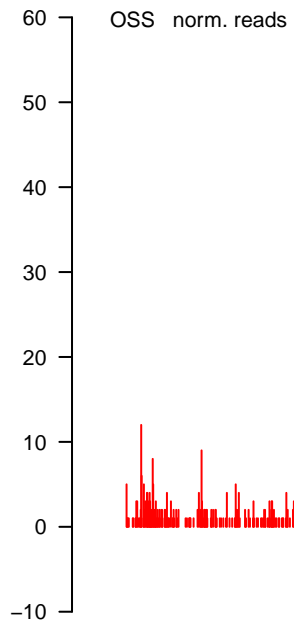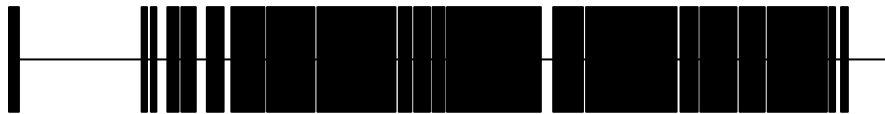

OSS unique reads

AGO1 chr 2R : 9831756 – 9845594 –

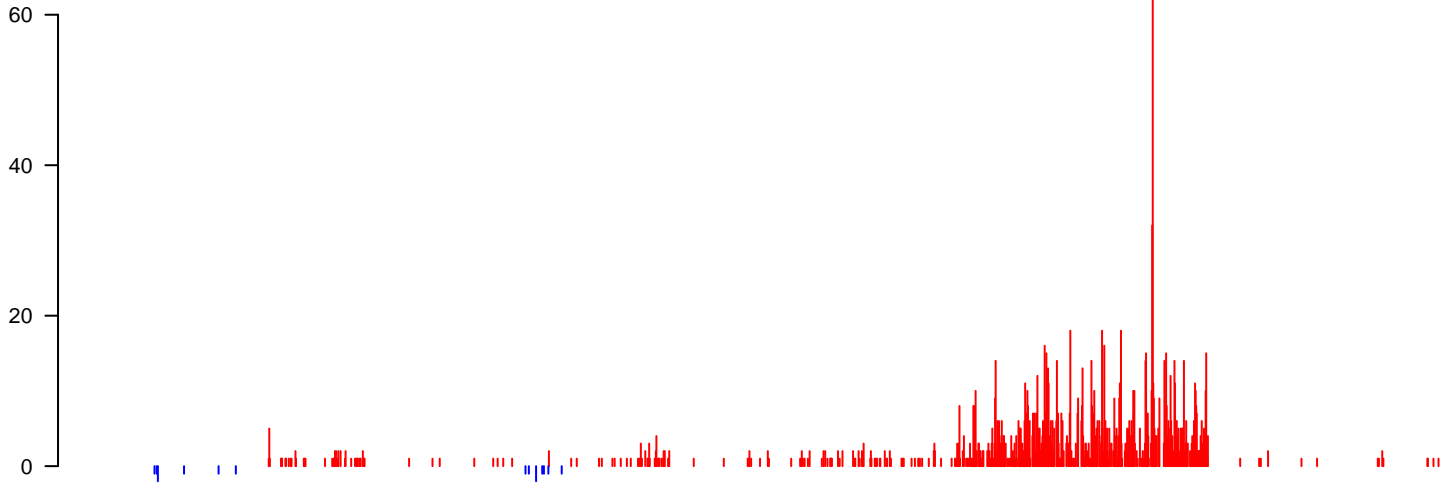

OSS norm. reads

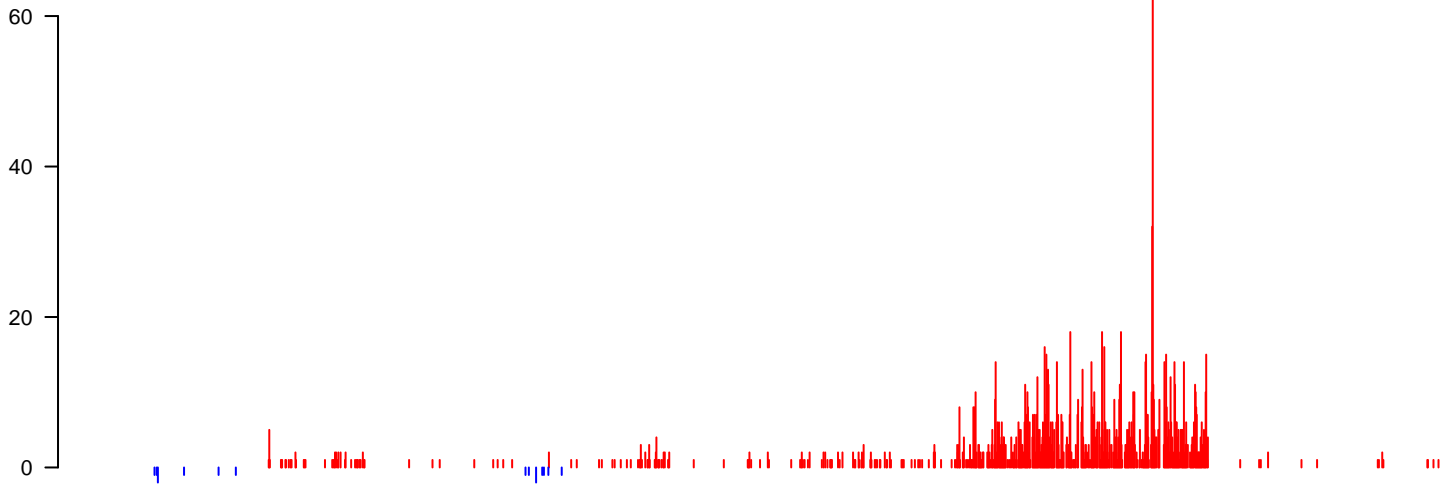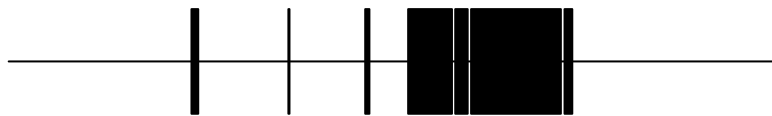

AGO1 2R – 9831756 9845594

OSS unique reads

CG2813 chr 2L : 574513 – 575799 +

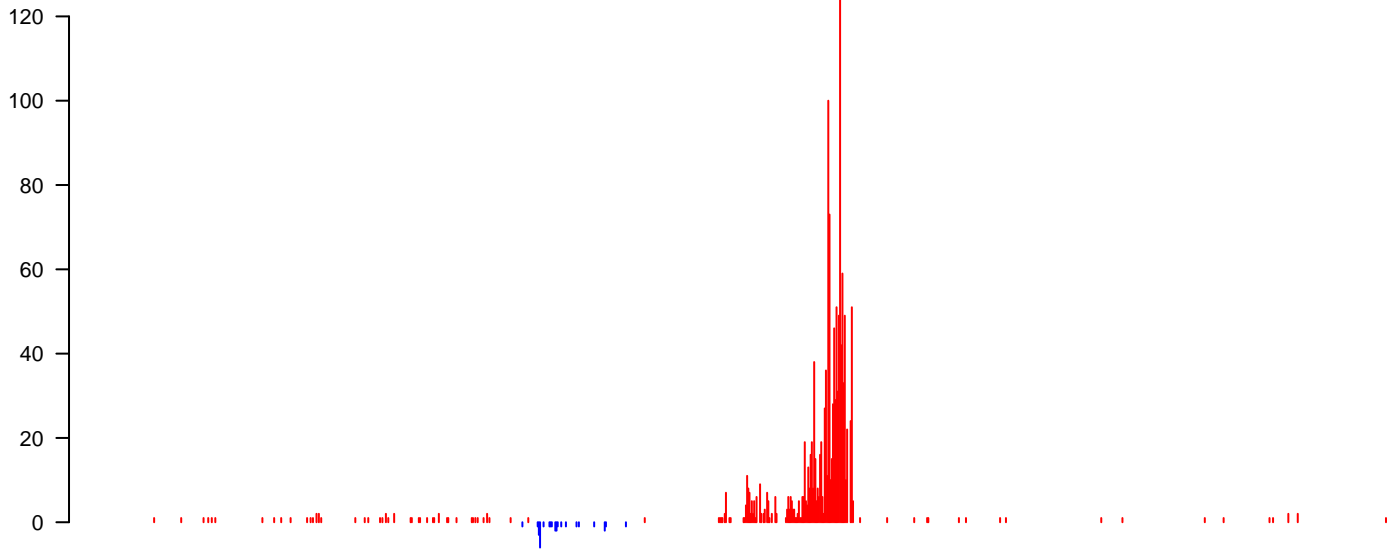

OSS norm. reads

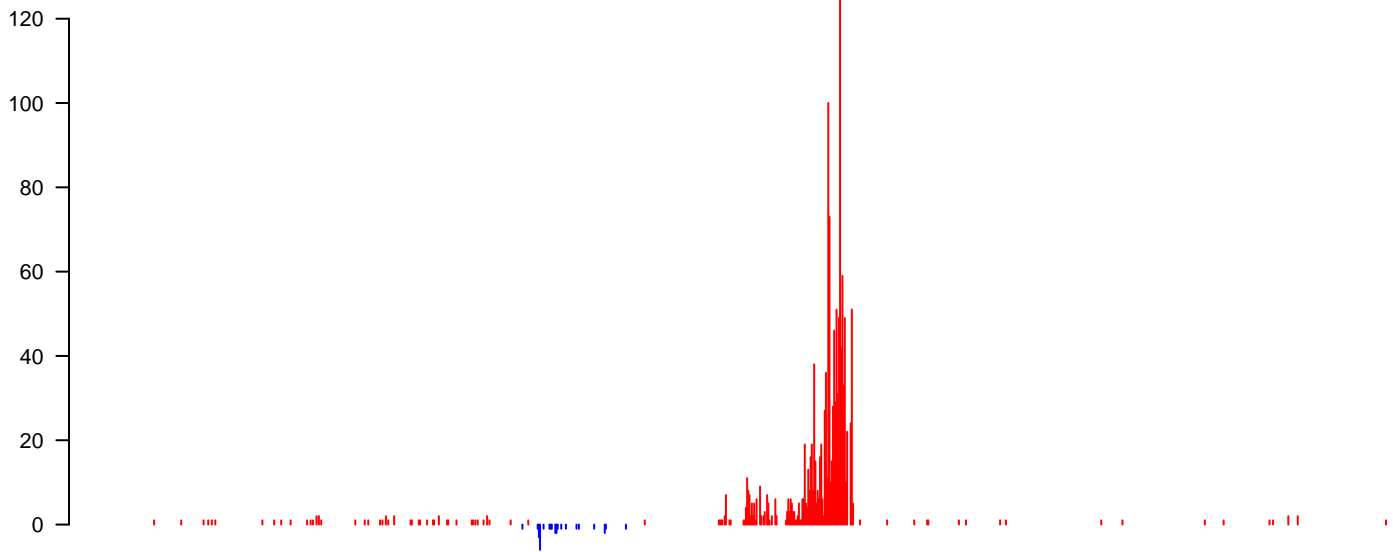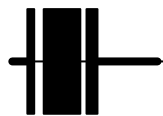

CG2813 2L + 574513 575799

CG32767 chr X : 4966381 – 4978760 –

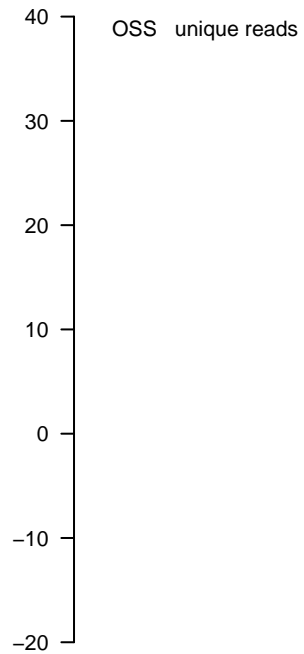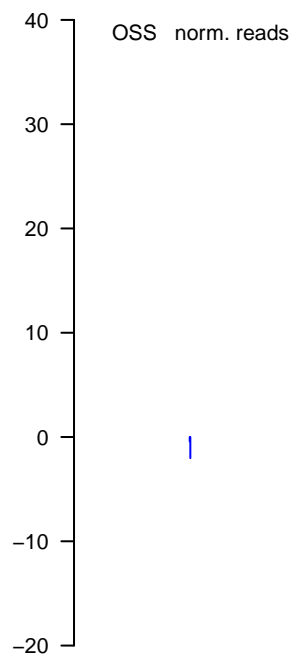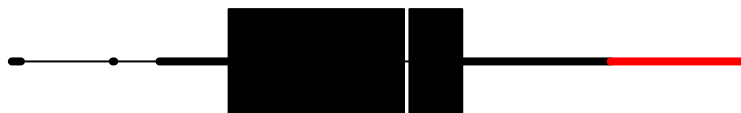



nrv1 chr 2L : 6778475 – 6786856

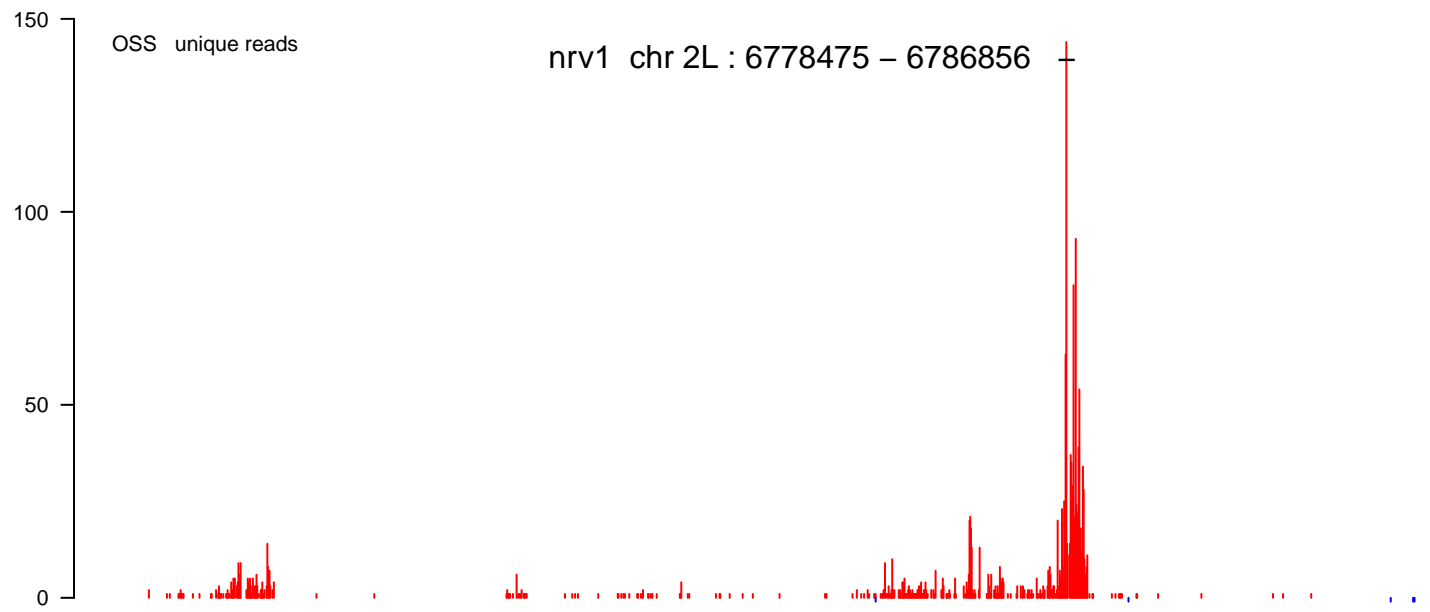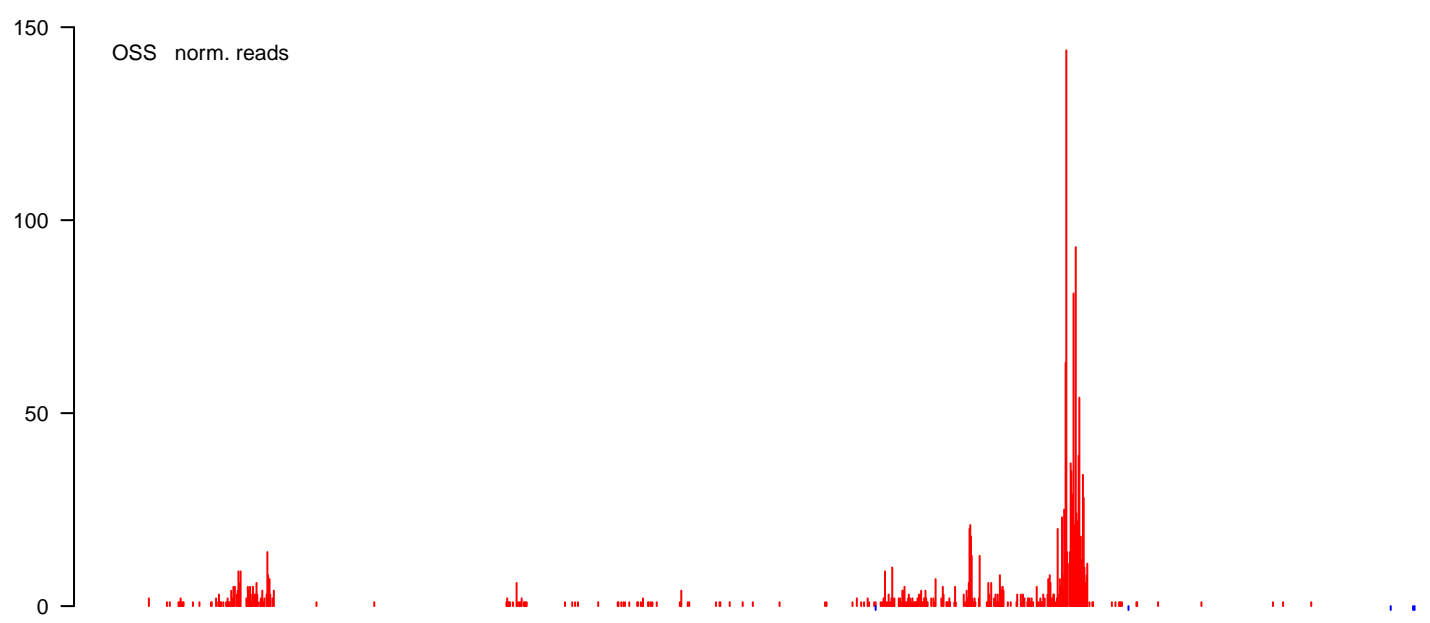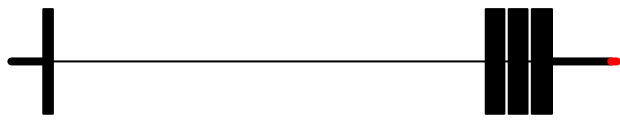

nrv1 2L – 6778475 6786856

OSS unique reads

sbb chr 2R : 14165638 – 14177357 –

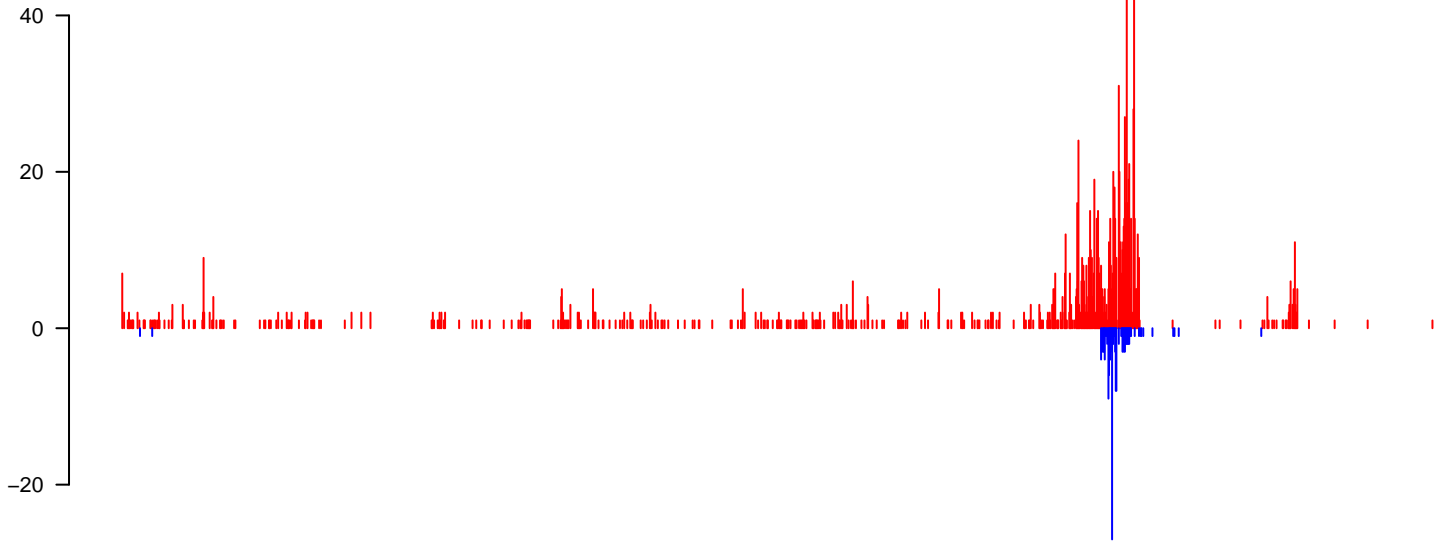

OSS norm. reads

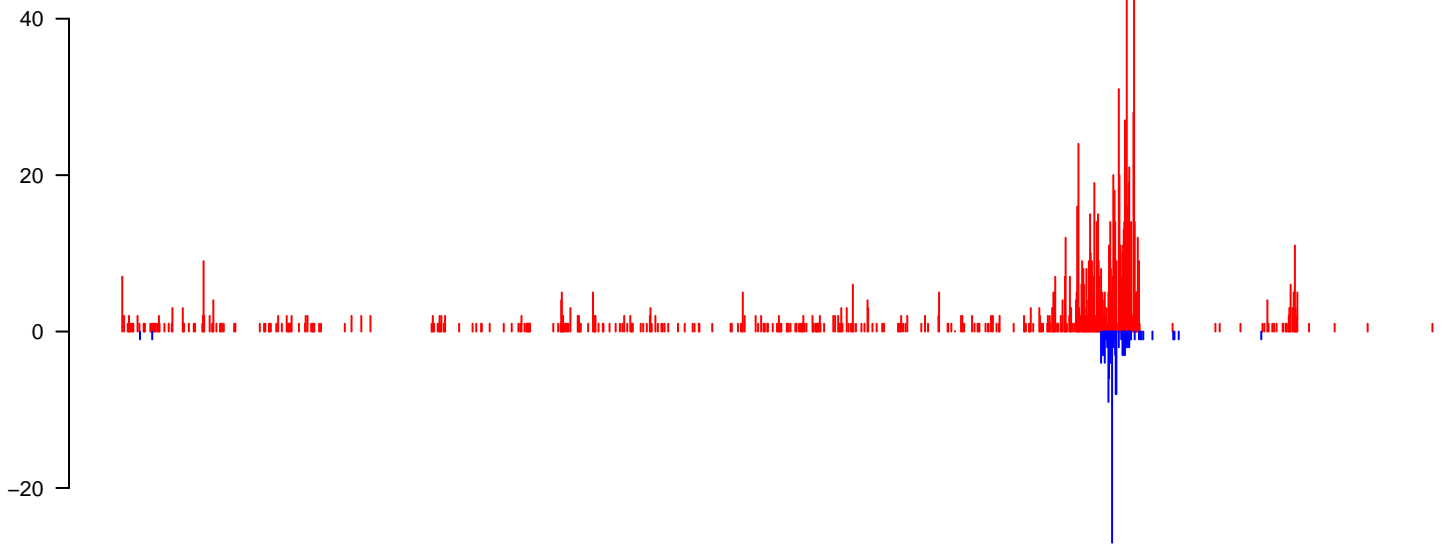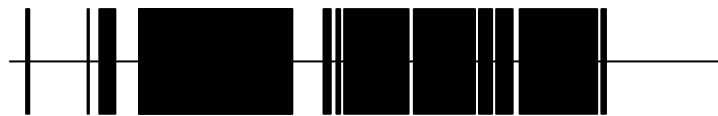

OSS unique reads

cpa chr 2R : 16945296 - 16947391 +

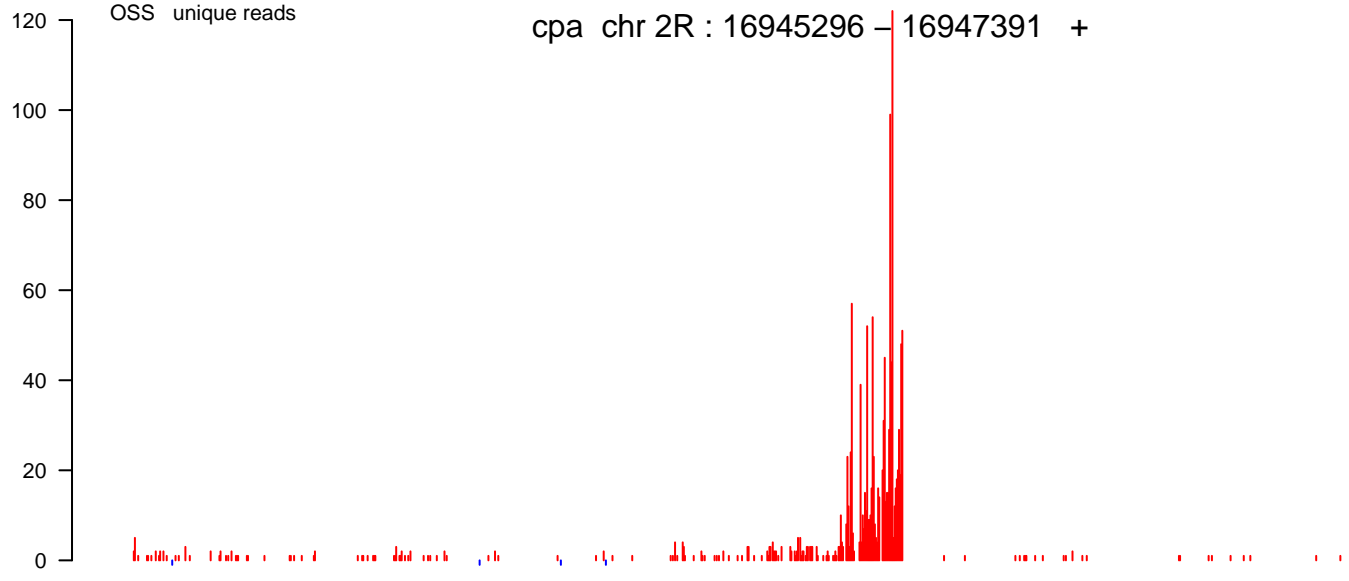

OSS norm. reads

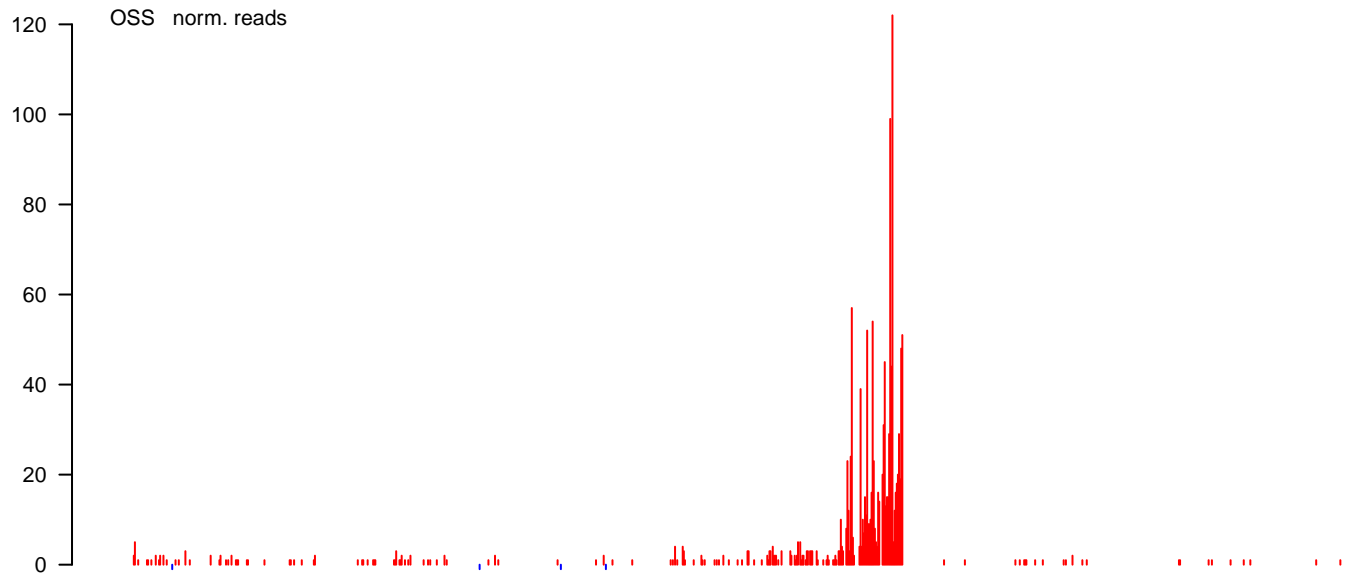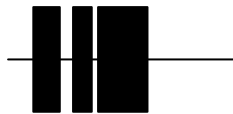

cpa 2R + 16945296 16947391

Su(var)2-10 chr 2R : 5003631 - 5009114 +

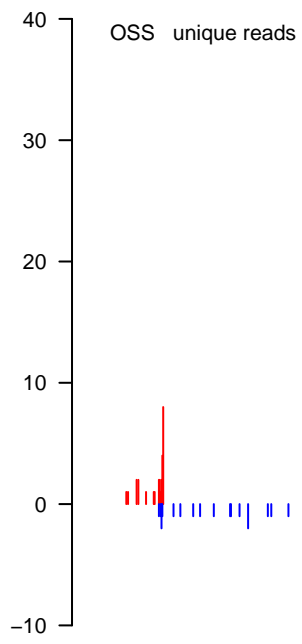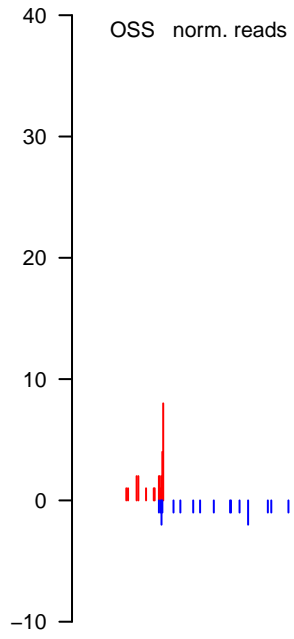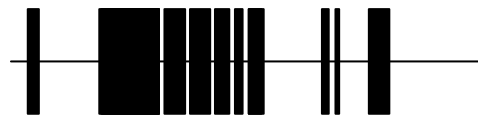

Imp chr X : 10687763 – 10716815 –

OSS unique reads

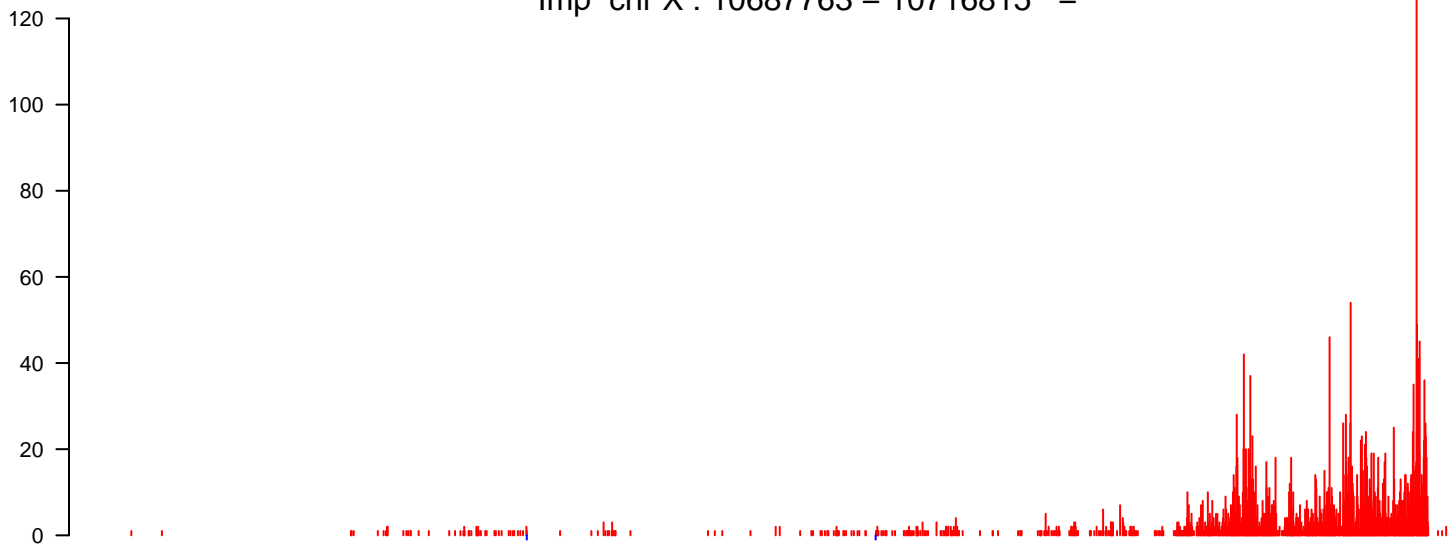

OSS norm. reads

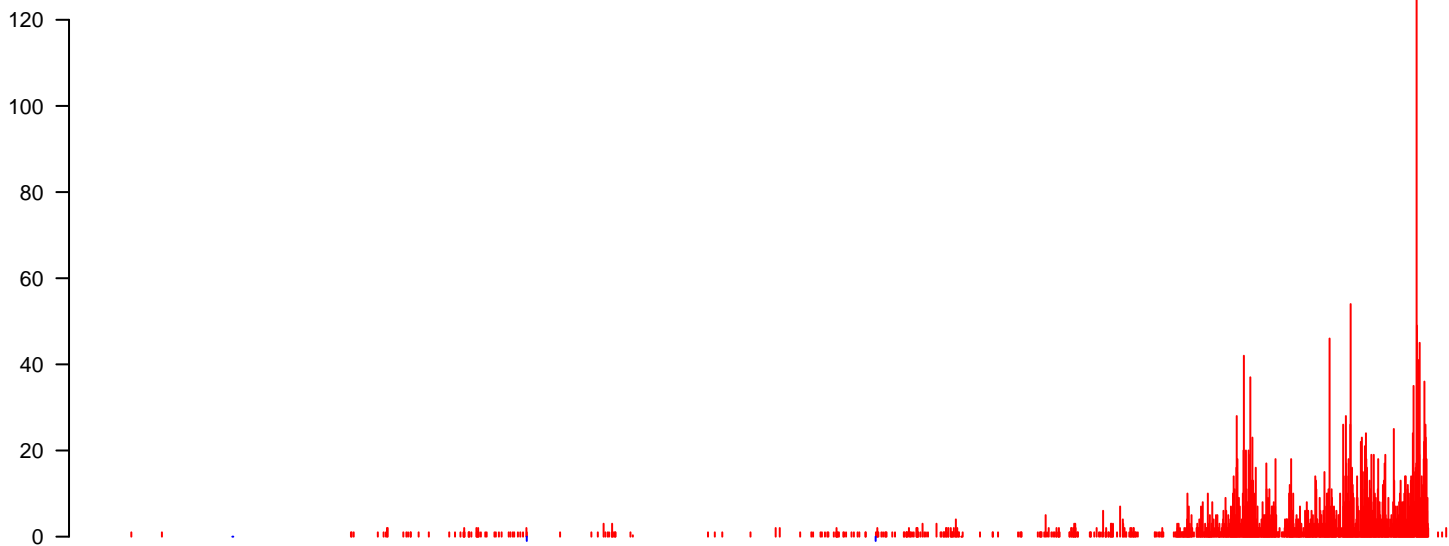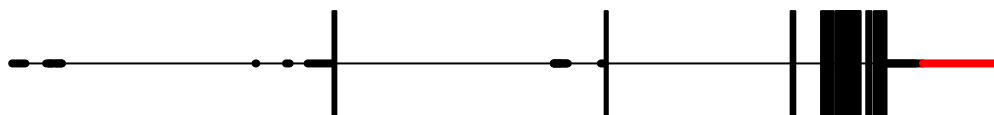

OSS unique reads

ptc chr 2R : 4537140 – 4552853 +

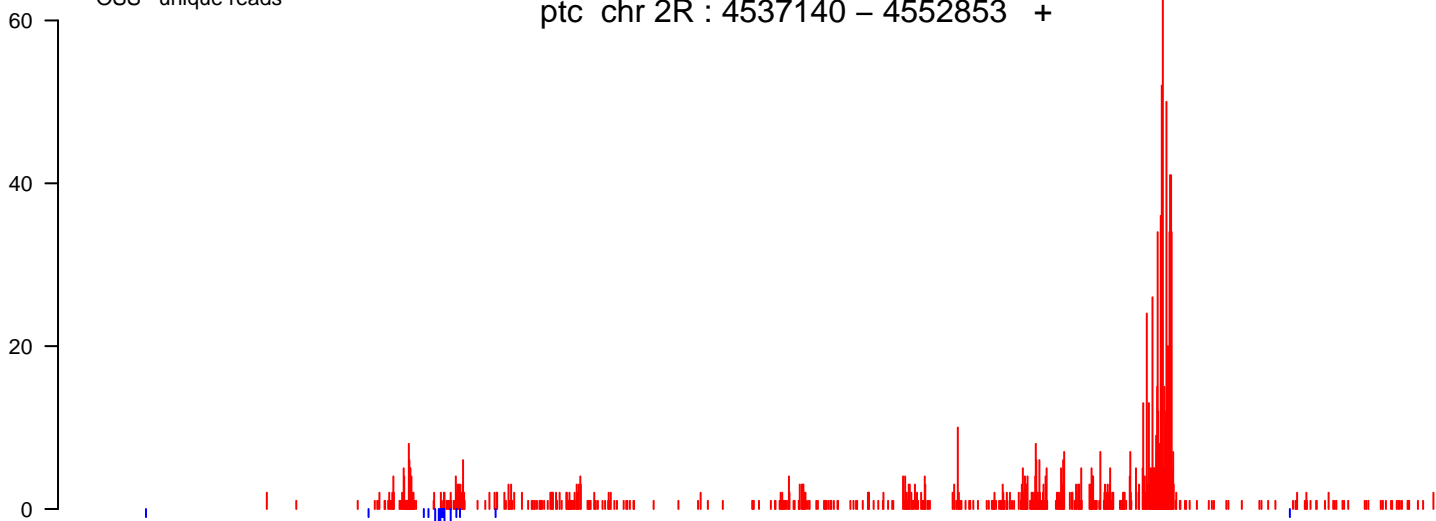

OSS norm. reads

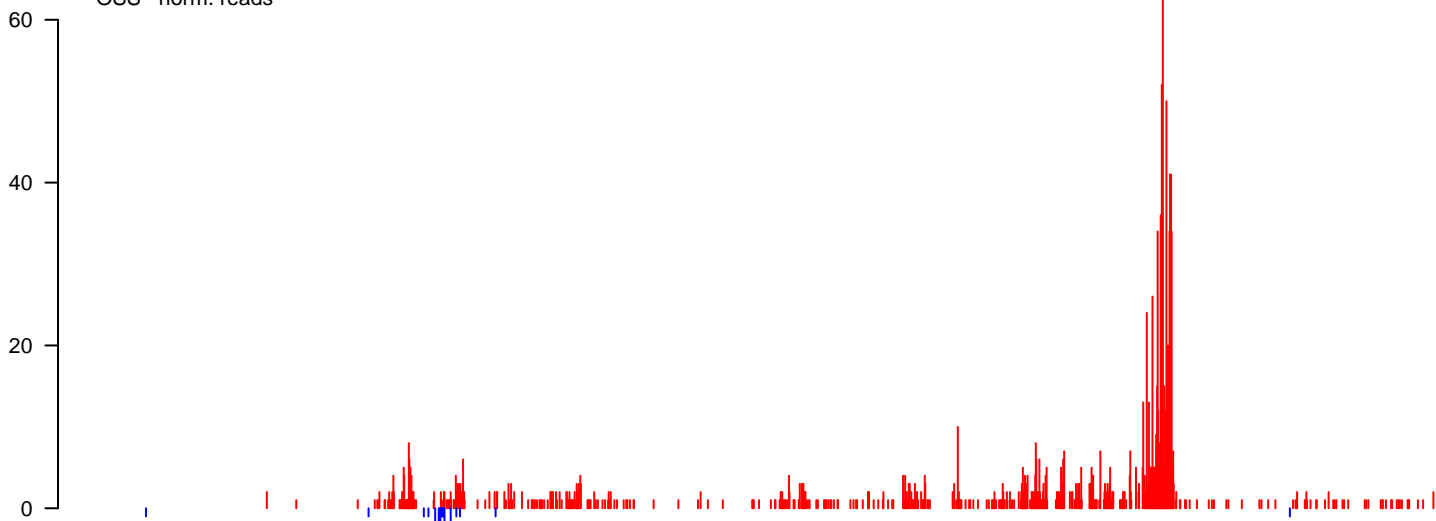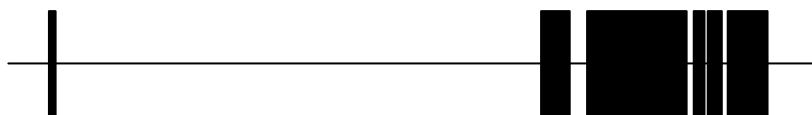

ptc 2R + 4537140 4552853

OSS unique reads

osa chr 3R : 13513528 – 13544059 –

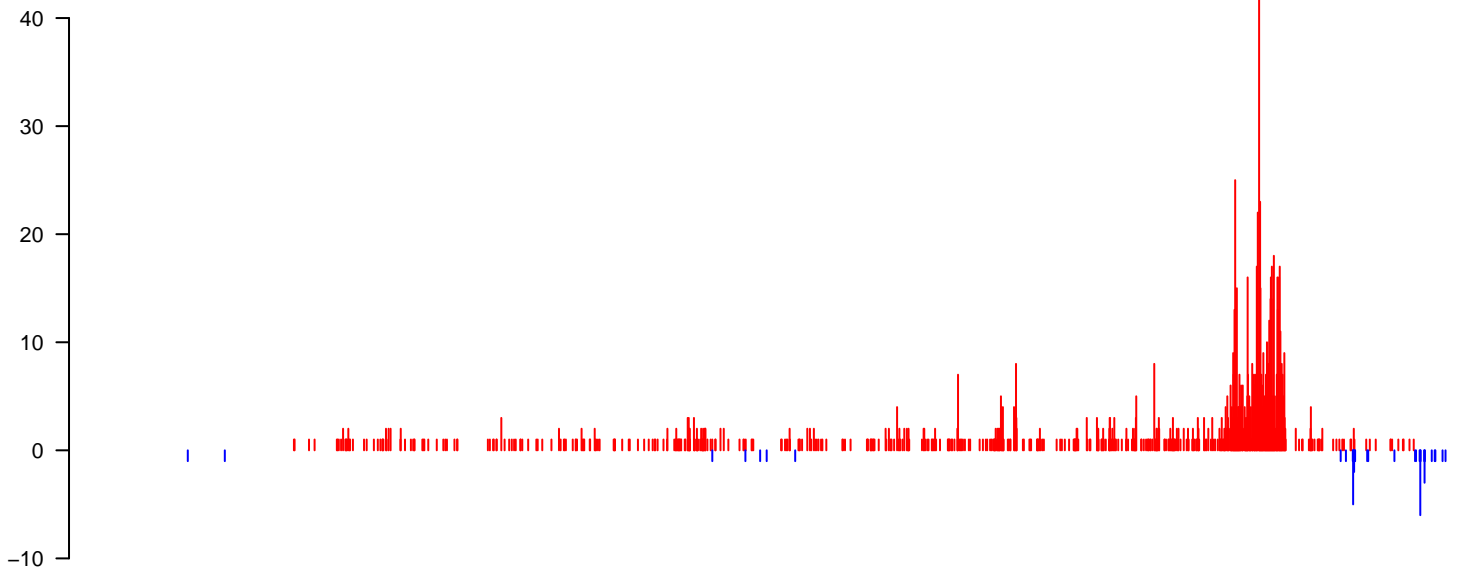

OSS norm. reads

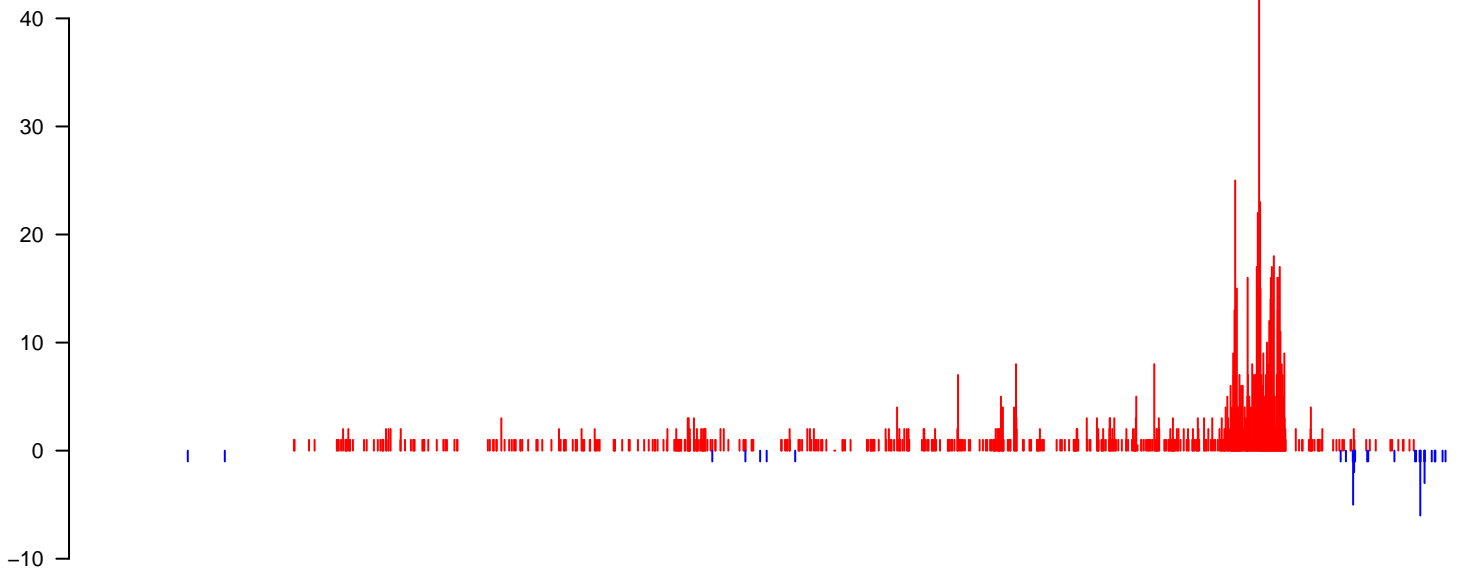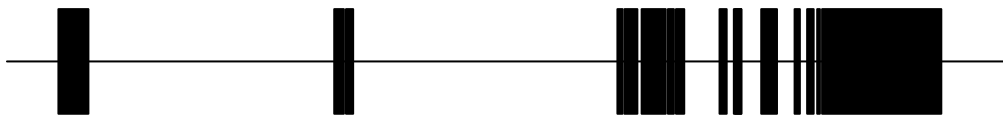

osa 3R – 13513528 13544059

OSS unique reads

CG11652 chr 3L : 11685525 – 11690086 –

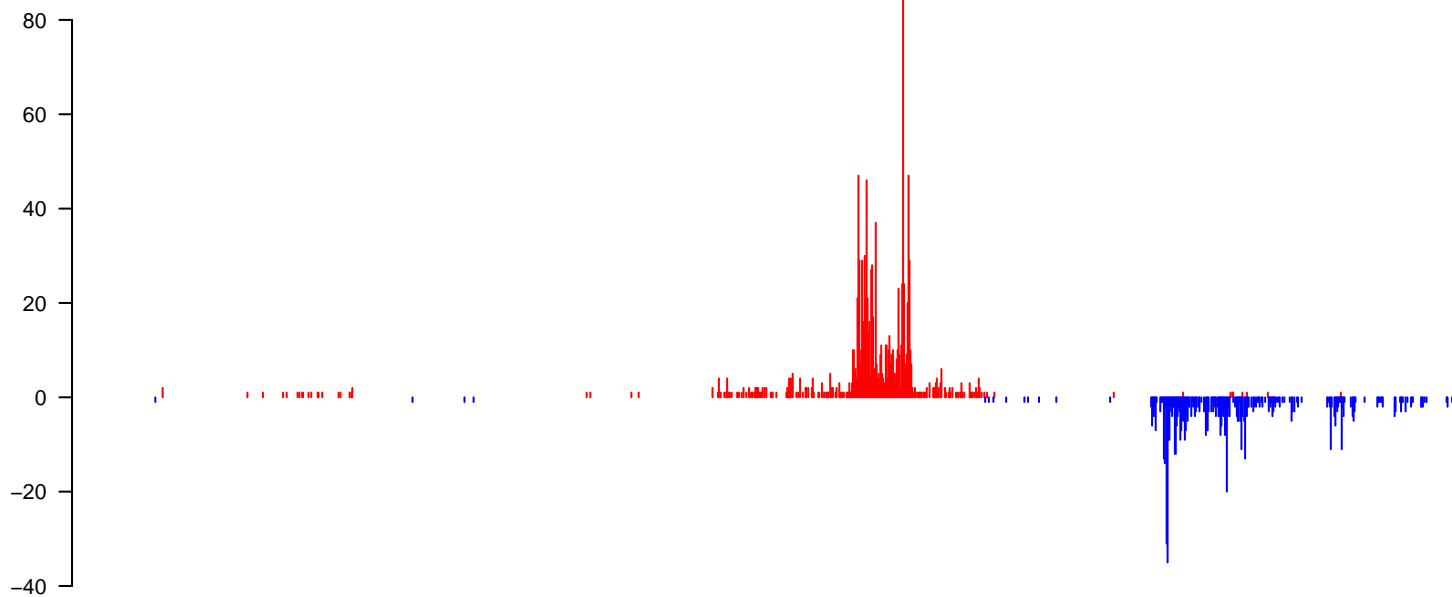

OSS norm. reads

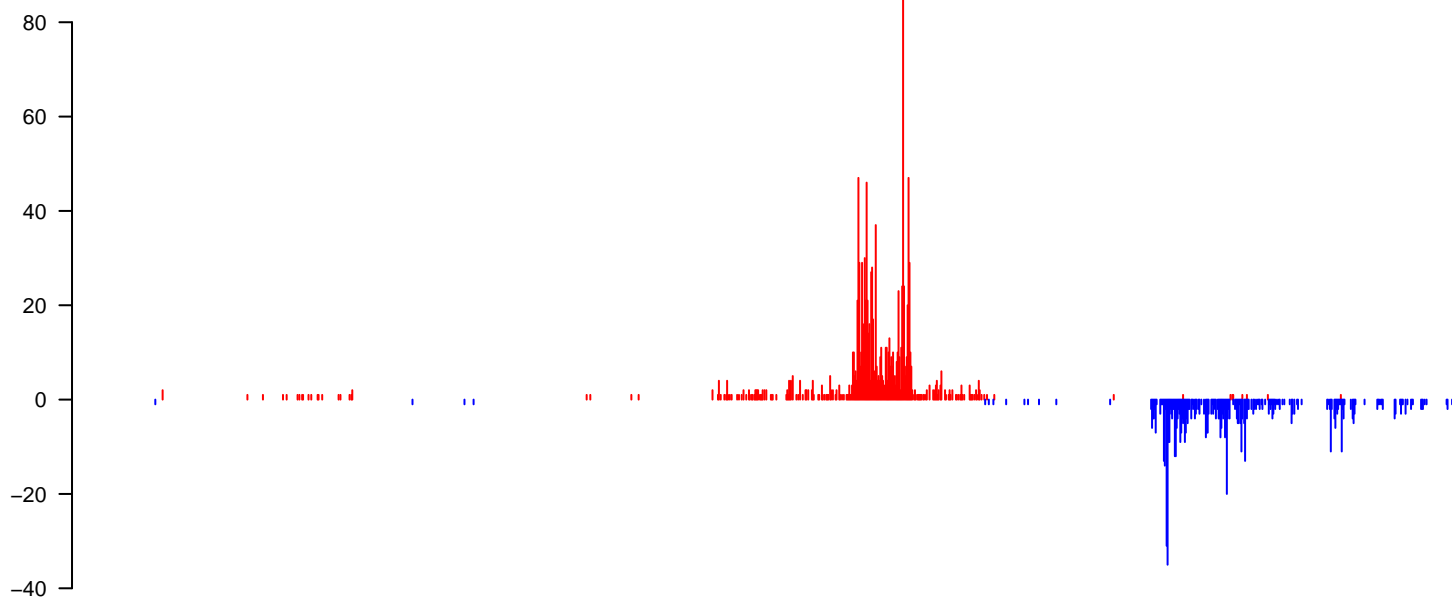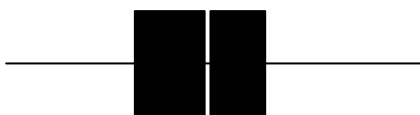

CG11652 3L – 11685525 11690086



OSS unique reads

Stat92E chr 3R : 16361034 – 16378034 –

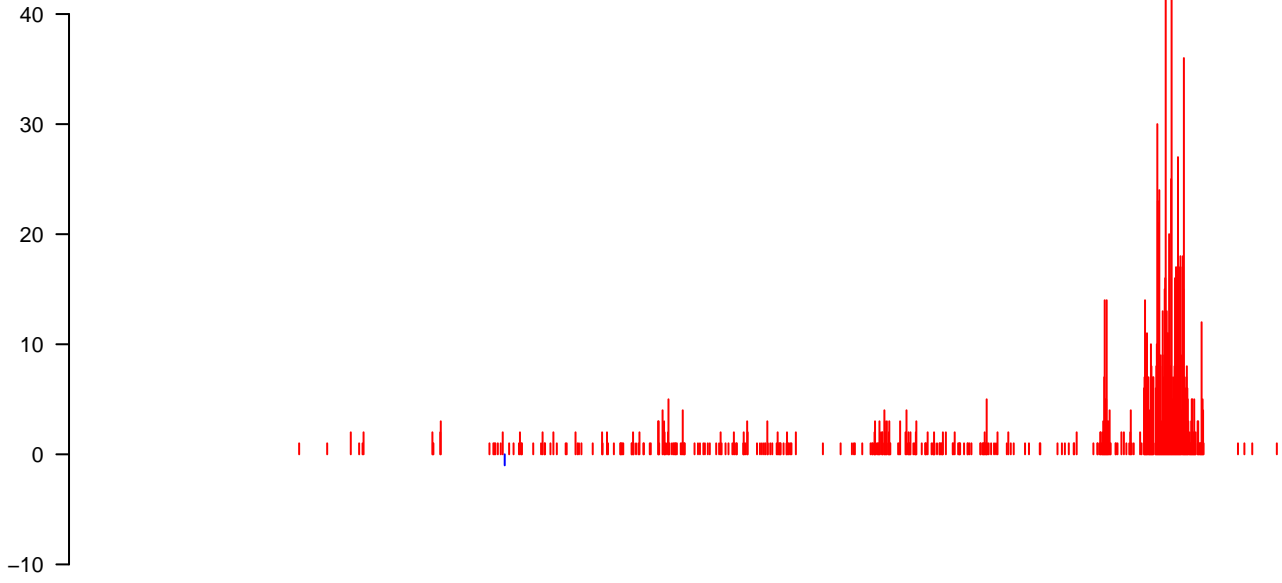

OSS norm. reads

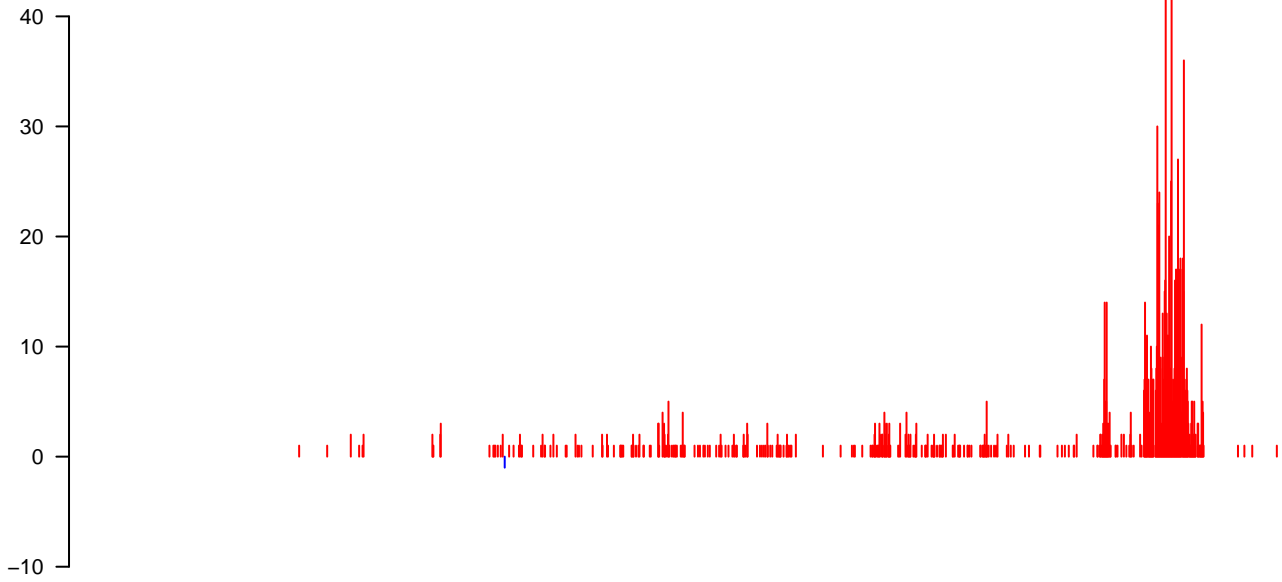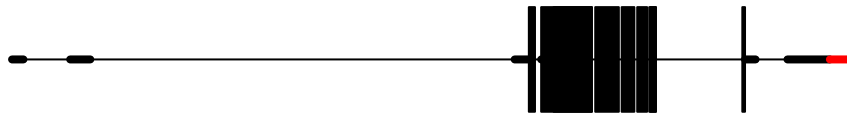

Stat92E 3R – 16361034 16378034

CG12360 chr 3R : 8851334 - 8856372 -

OSS unique reads

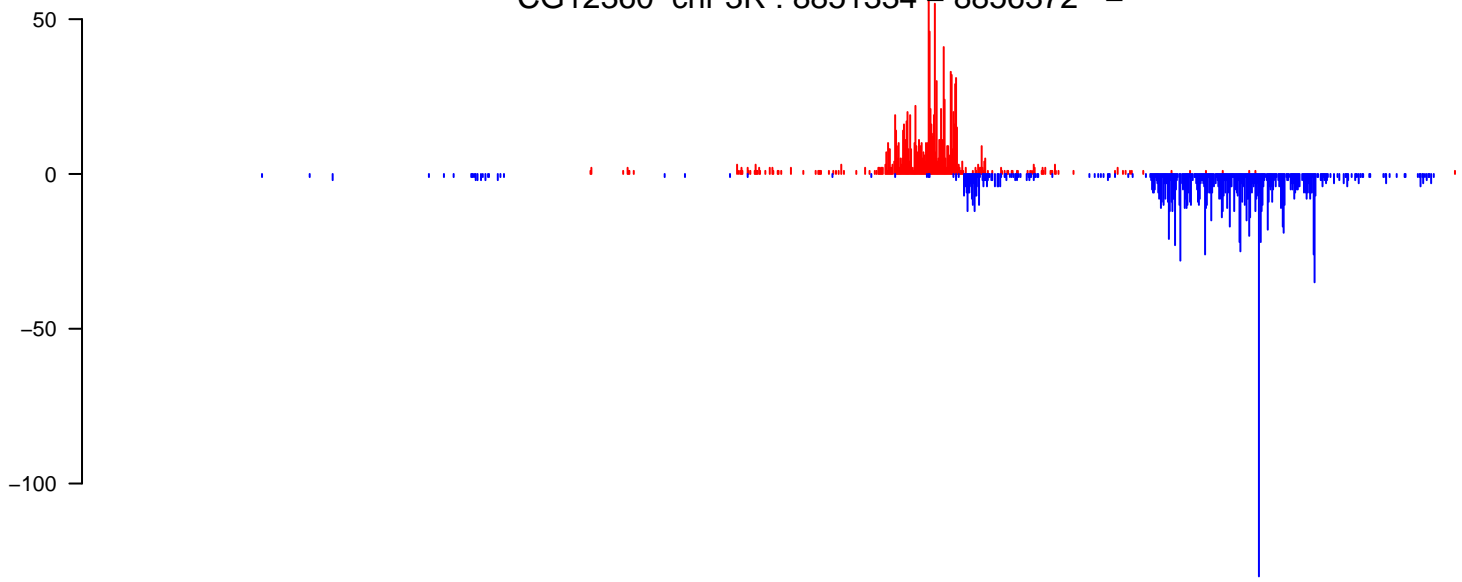

OSS norm. reads

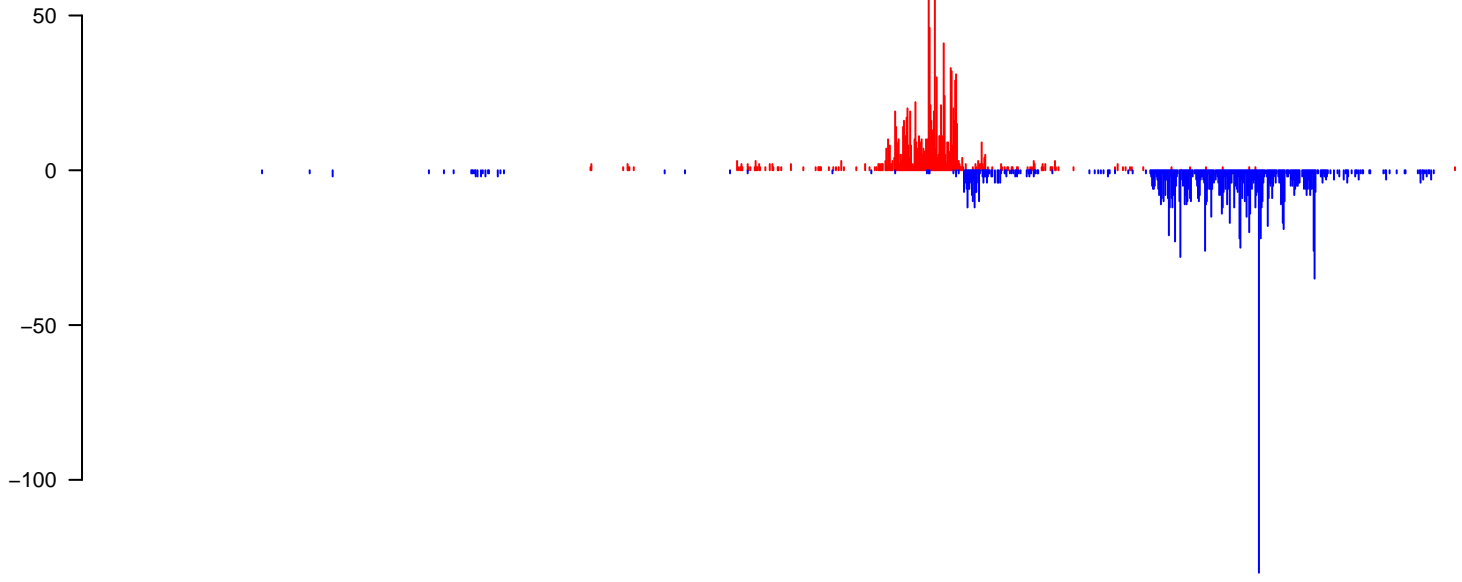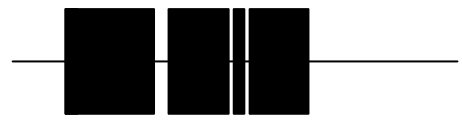

CG12360 3R - 8851334 8856372

BicD chr 2L : 17460470 – 17473255 –

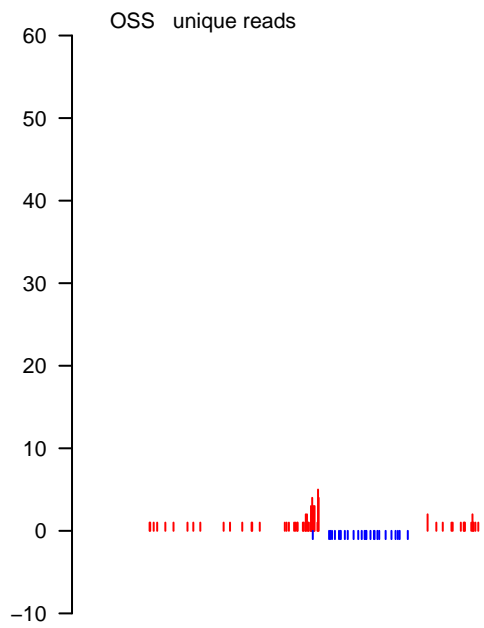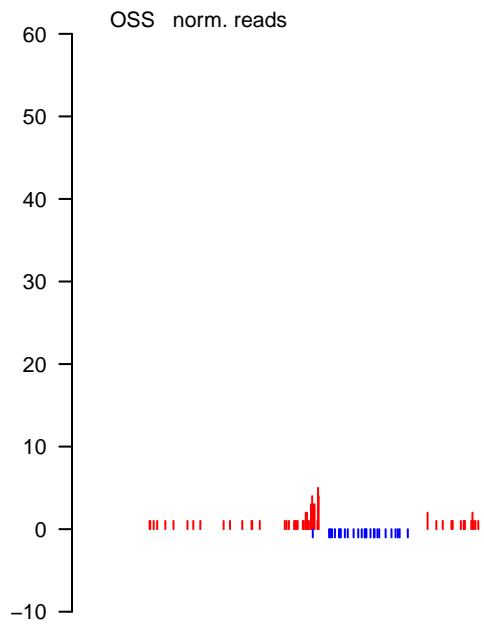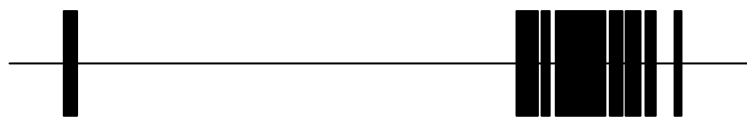

dpld chr 2R : 3366384 – 3377368 –

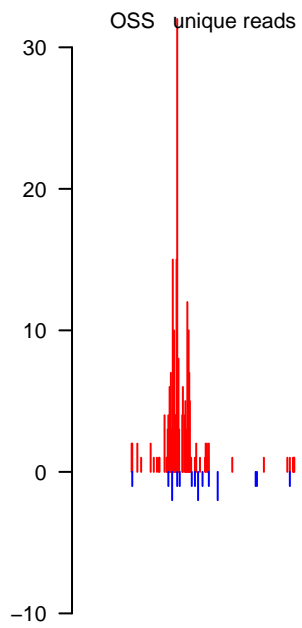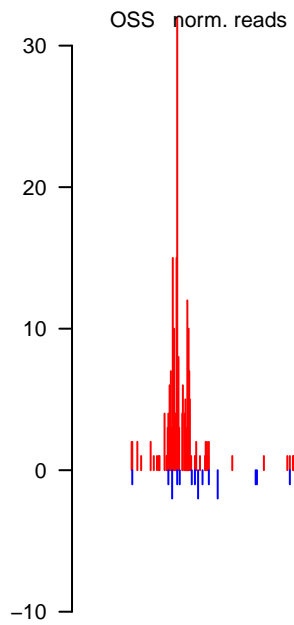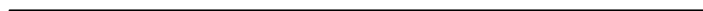

OSS unique reads

pUf68 chr 3L : 1496850 – 1502589 –

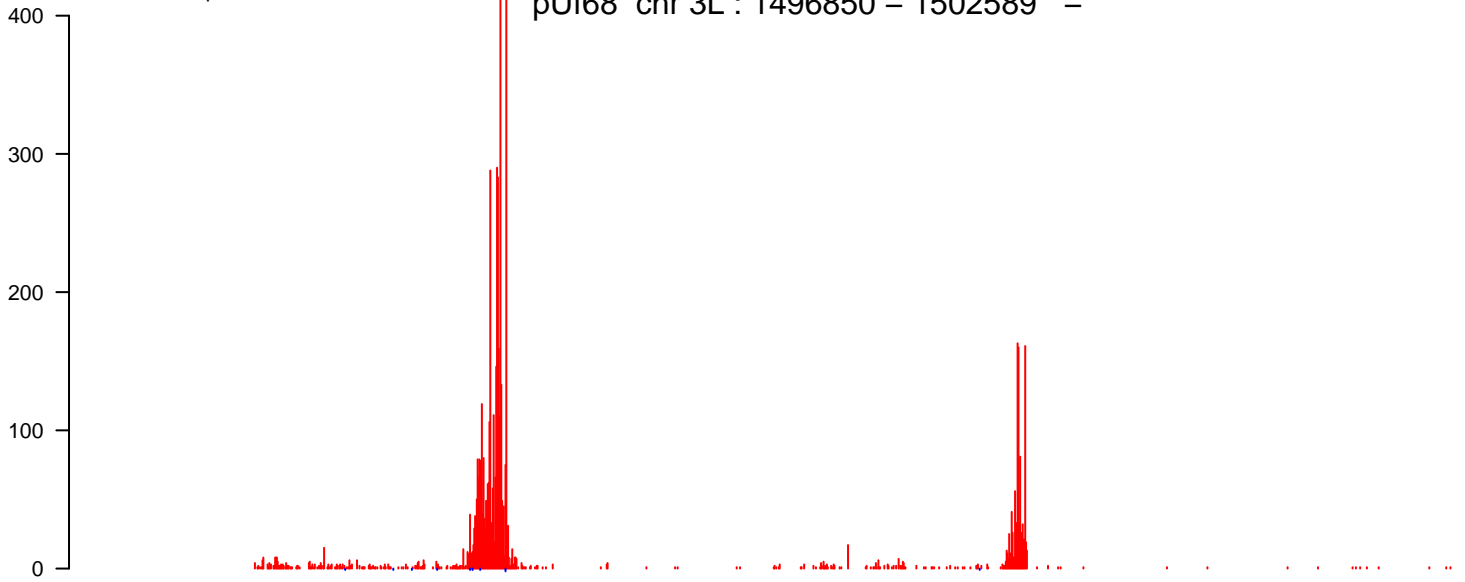

OSS norm. reads

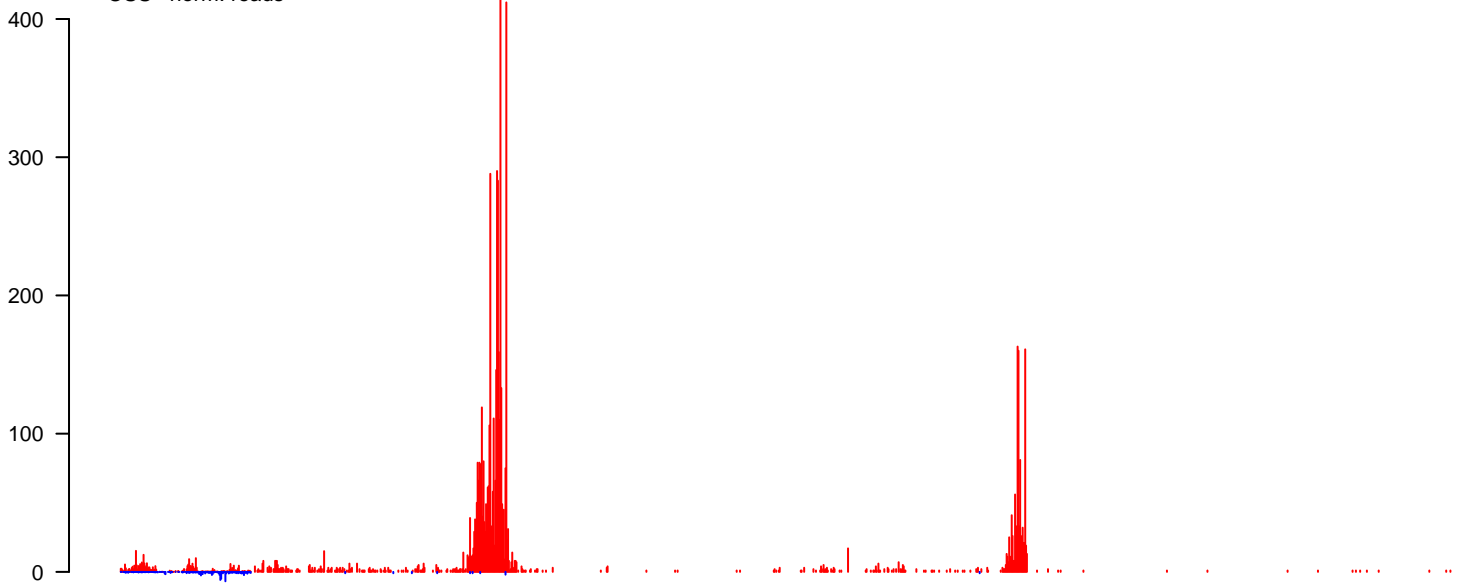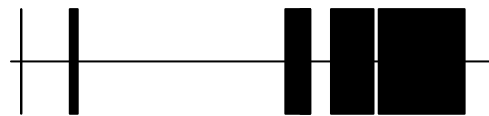

pUf68 3L – 1496850 1502589

OSS unique reads

CG2765 chr 2R : 20847361 – 20852606 –

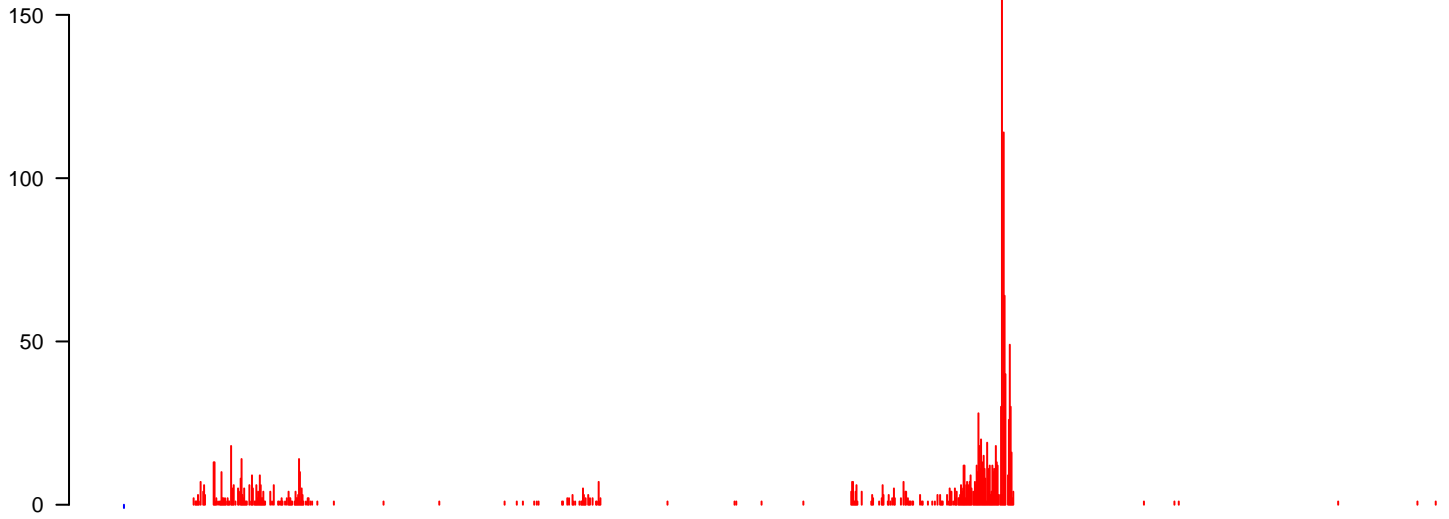

OSS norm. reads

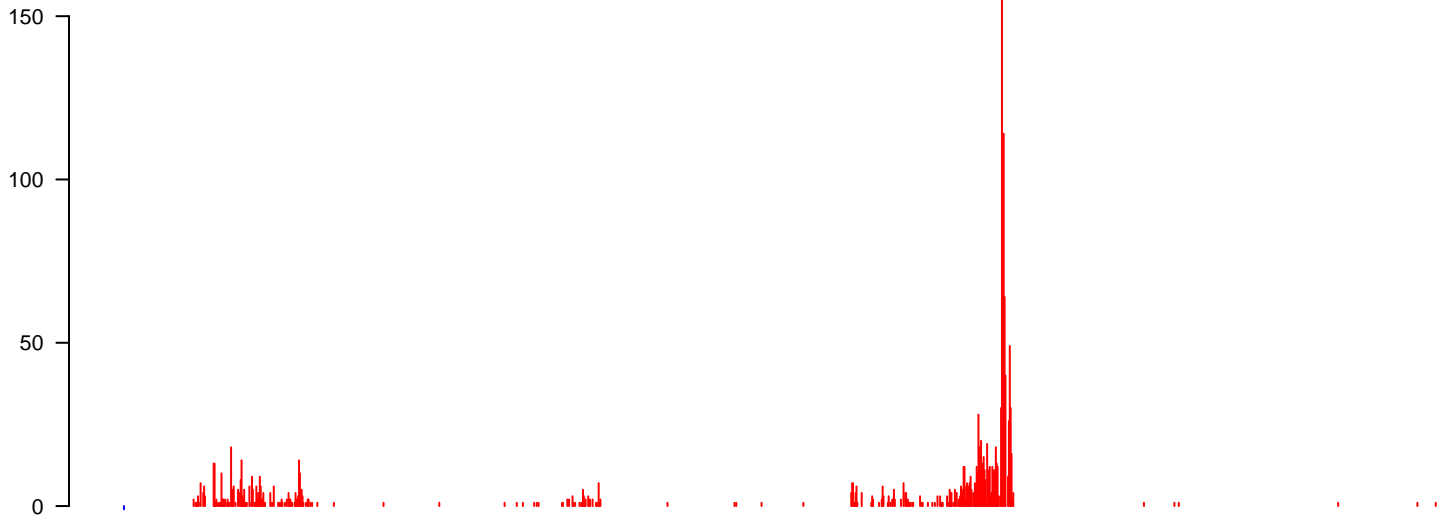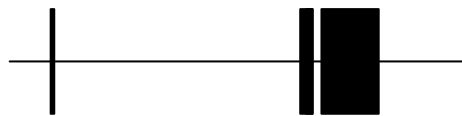

CG2765 2R – 20847361 20852606

RhoGAP71E chr 3L : 15581980 – 15602231 +

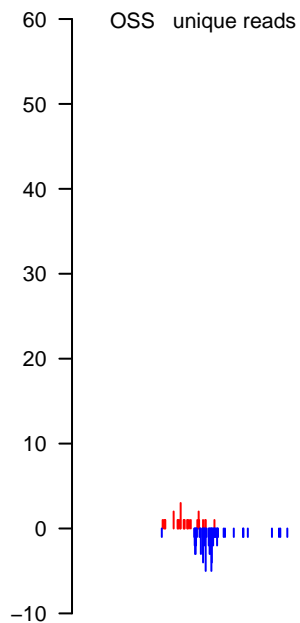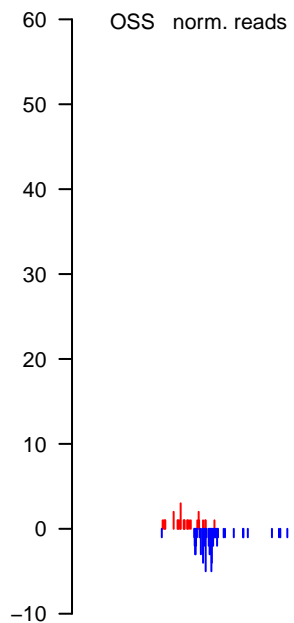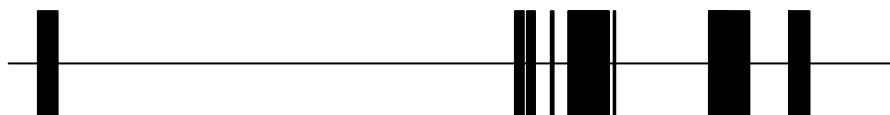

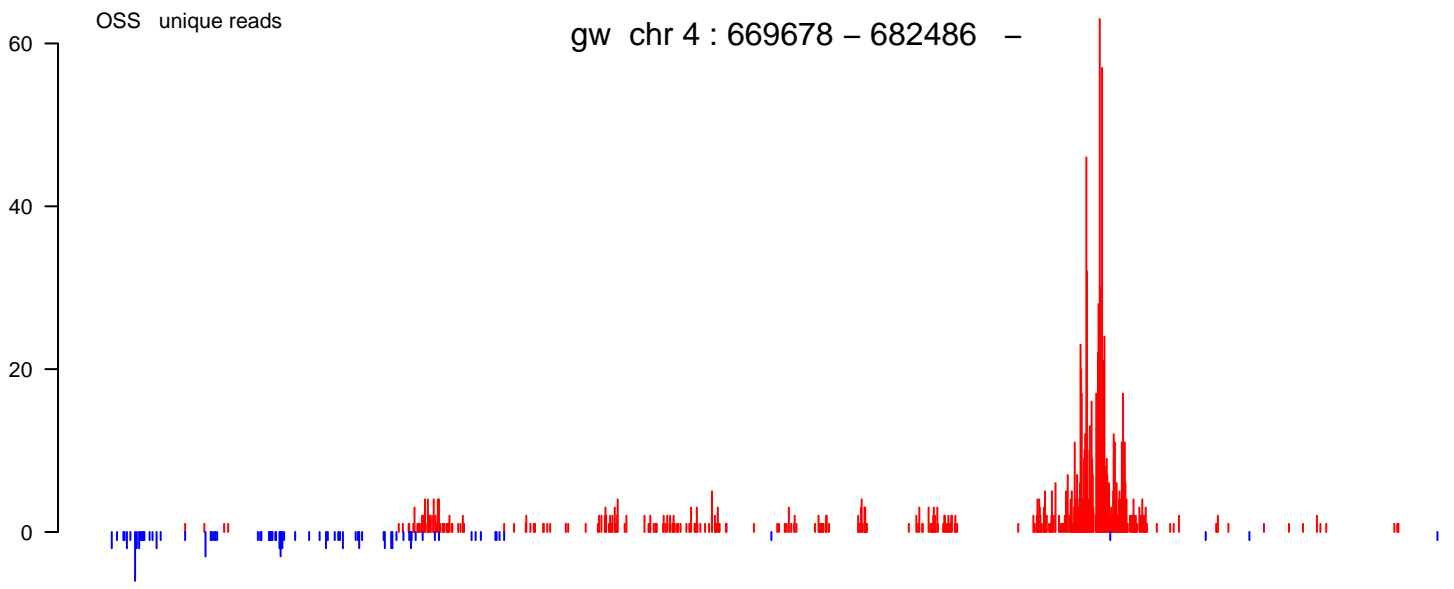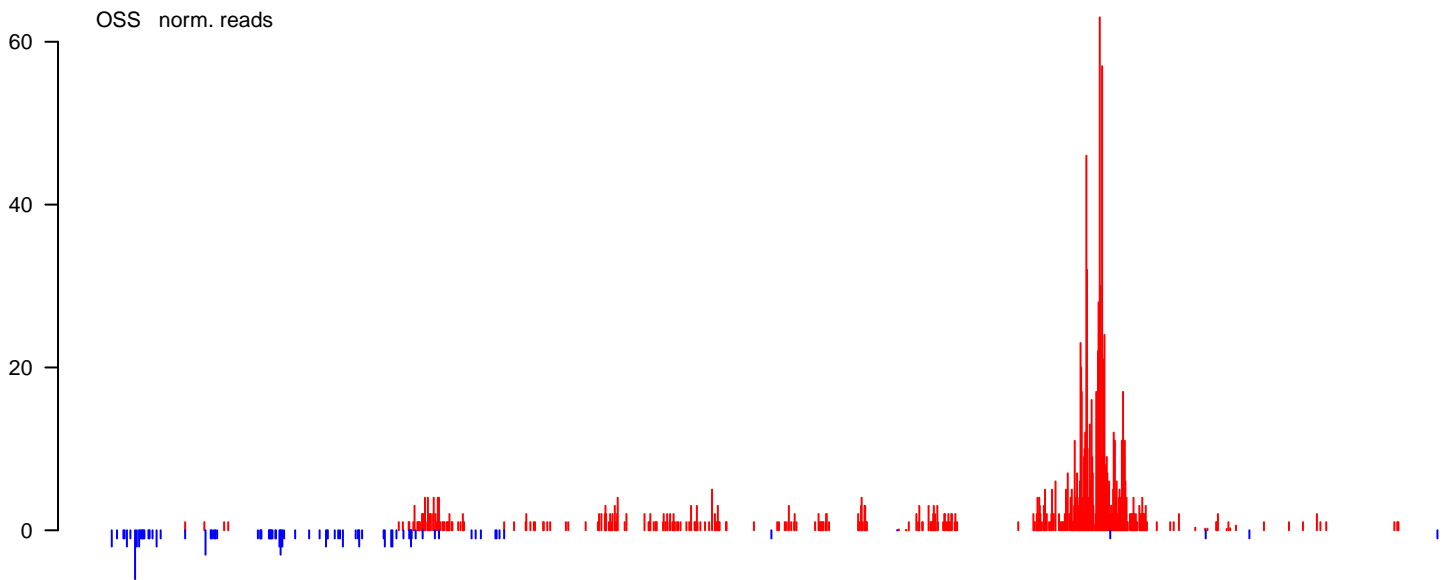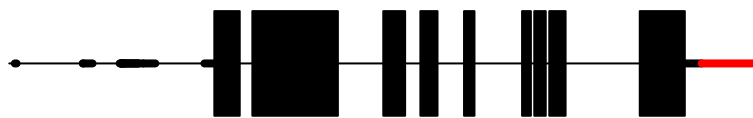



how chr 3R : 17867914 - 17905049 +

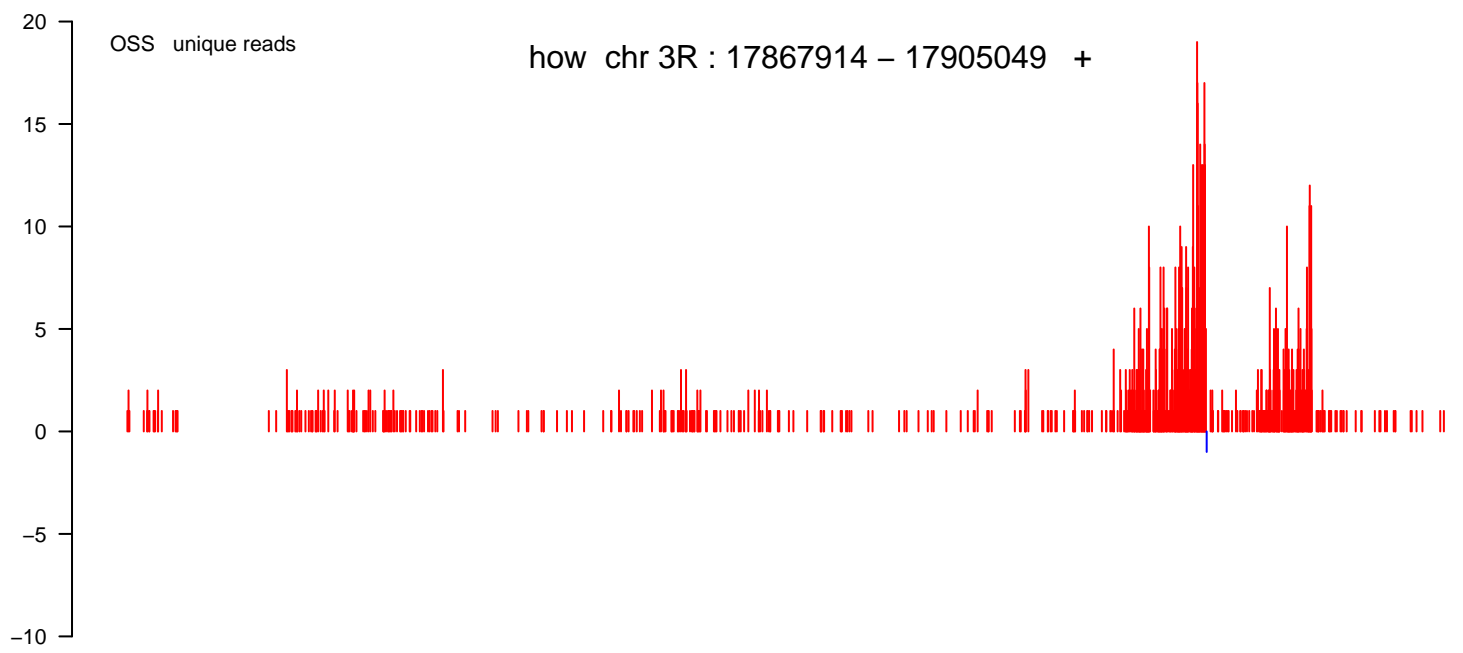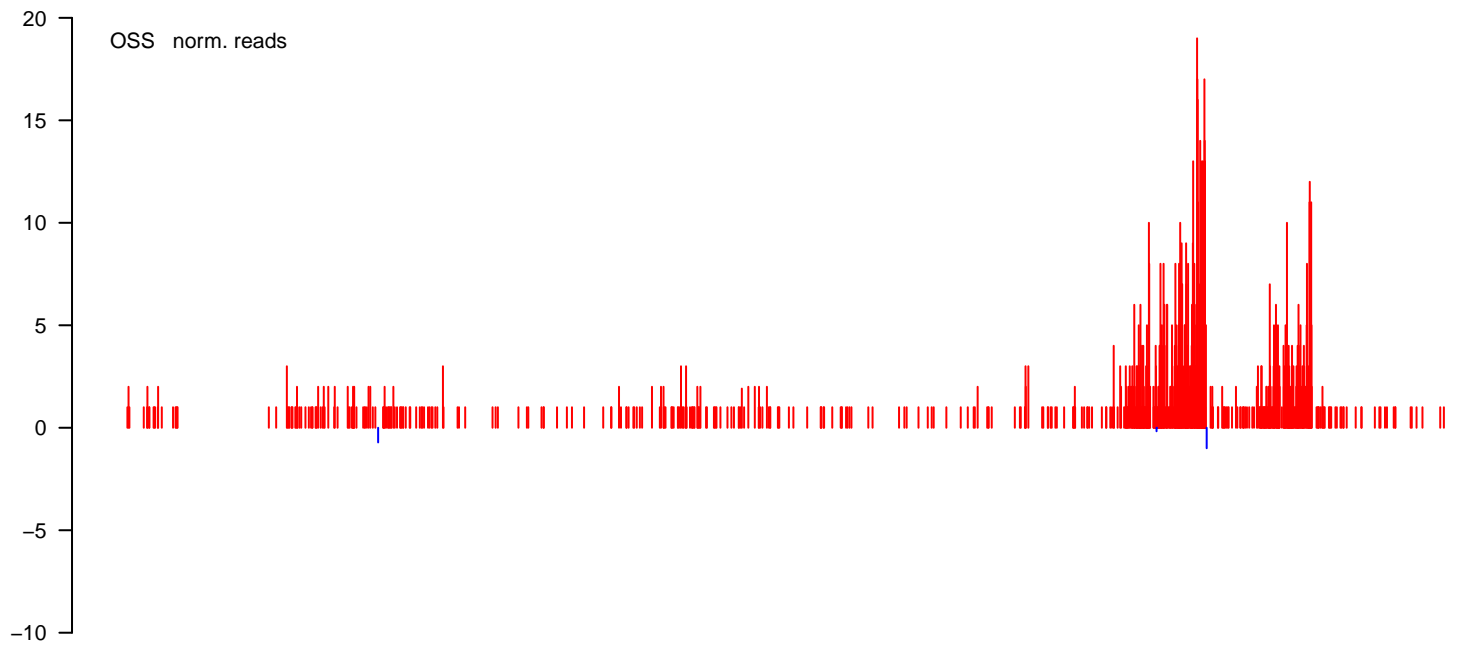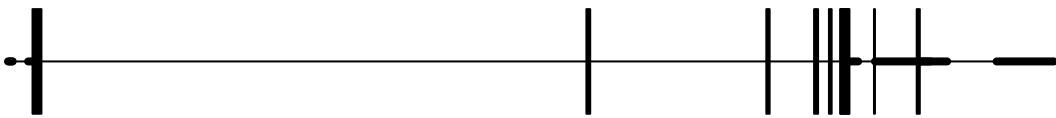

how 3R + 17867914 17905049

OSS unique reads

Smox chr X : 8031048 – 8036274 –

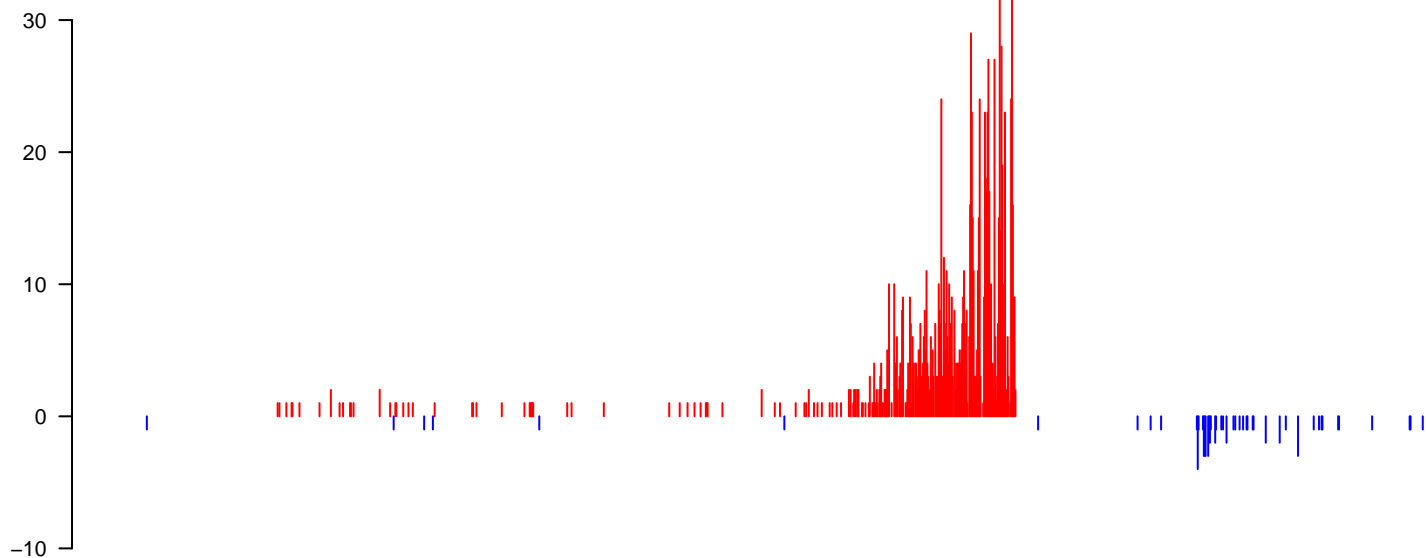

OSS norm. reads

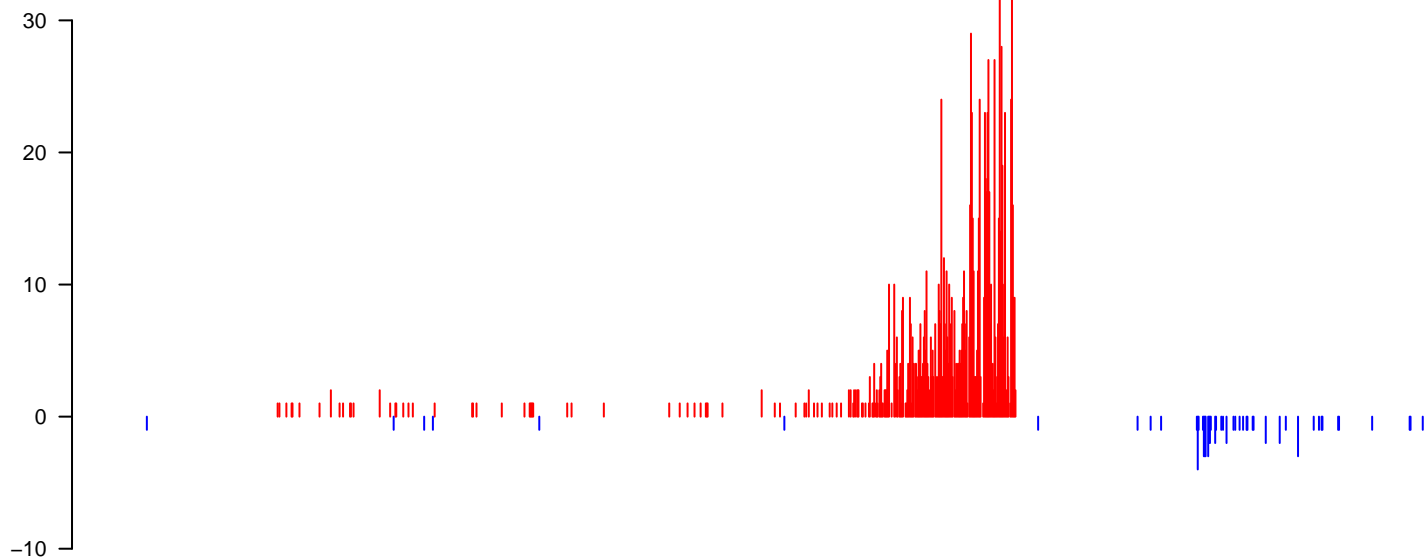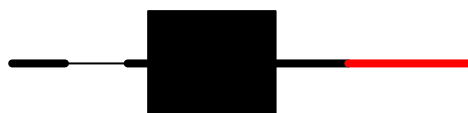

Smox X – 8031048 8036274

OSS unique reads

R chr 3L : 1859102 - 1862234 -

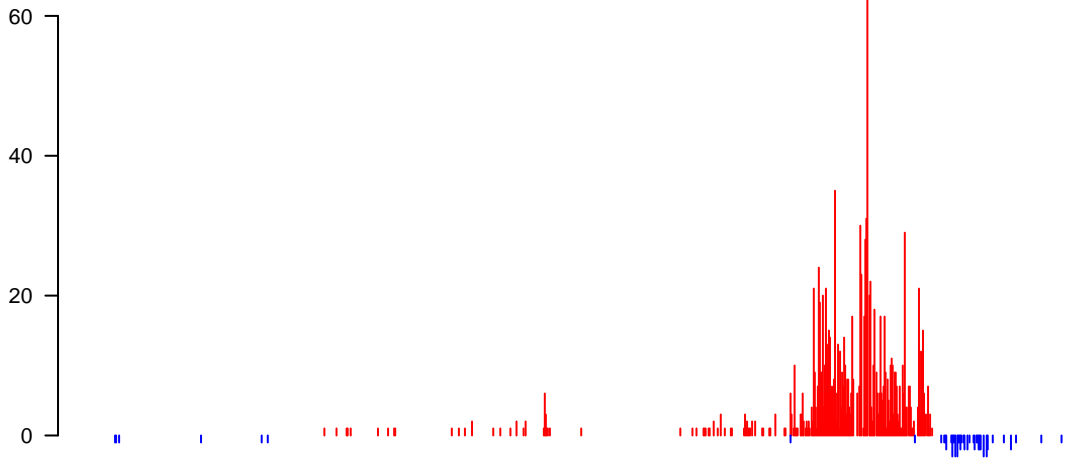

OSS norm. reads

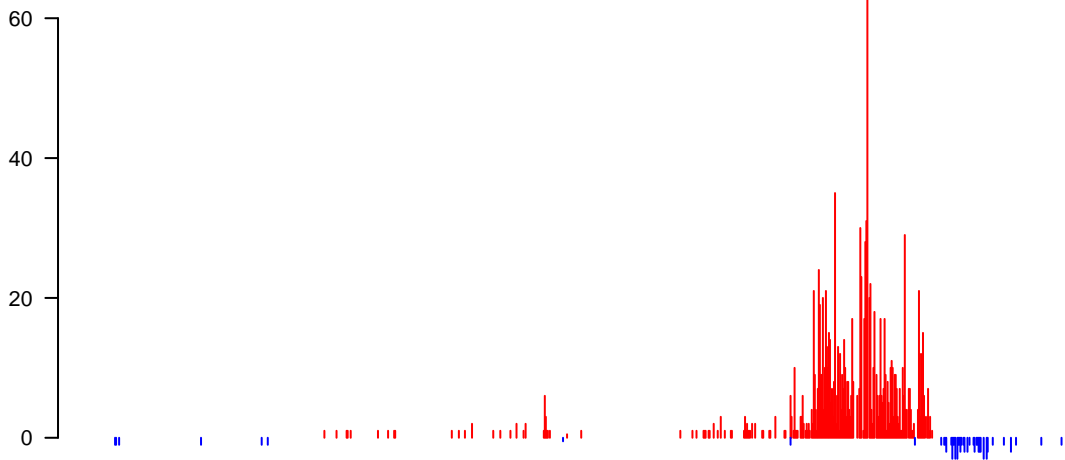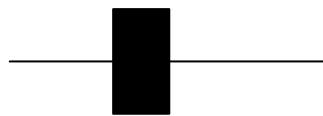

R 3L - 1859102 1862234

OSS unique reads

fax chr 3L : 16395891 – 16404939 –

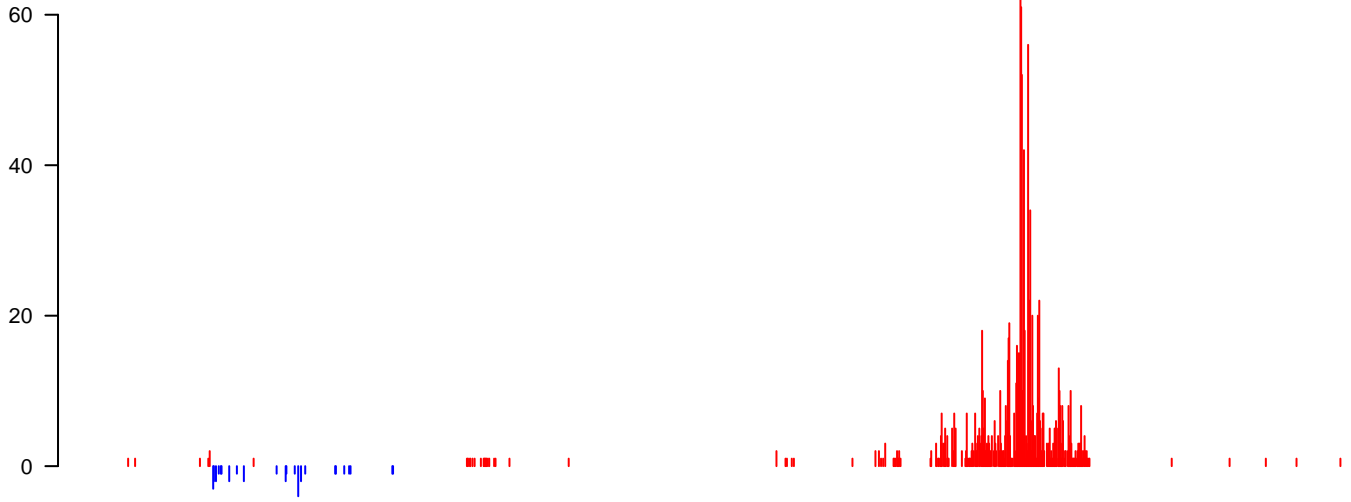

OSS norm. reads

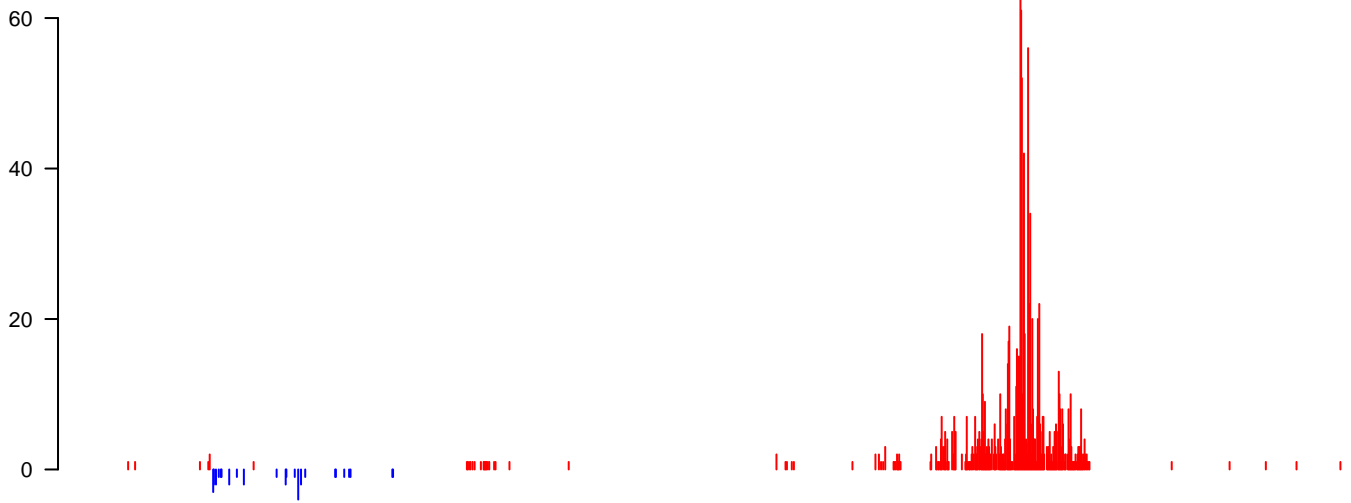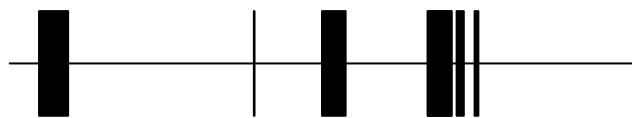

fax 3L – 16395891 16404939

CG30463 chr 2R : 12560729 – 12618889 –

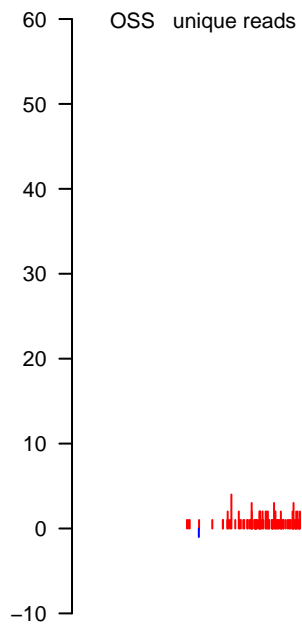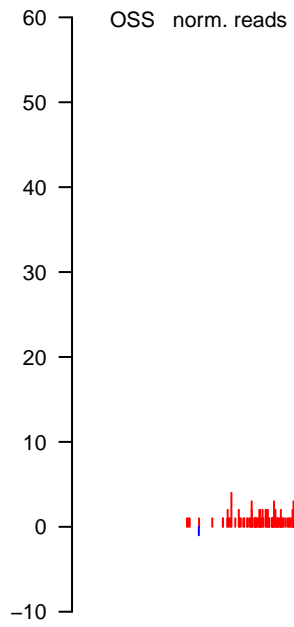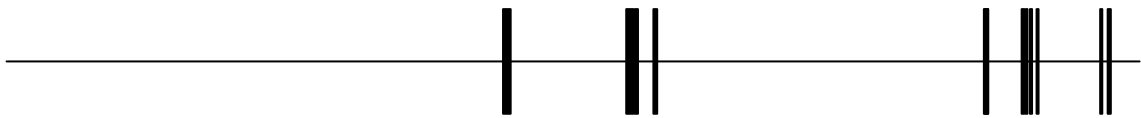

trol chr X : 2364491 – 2439423 –

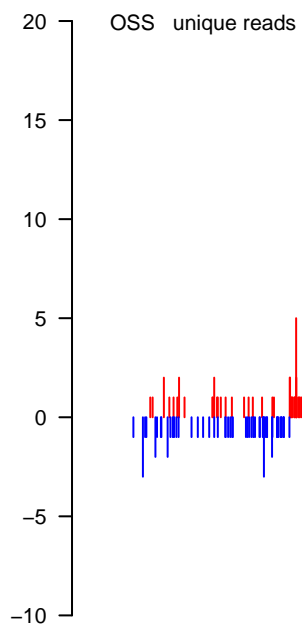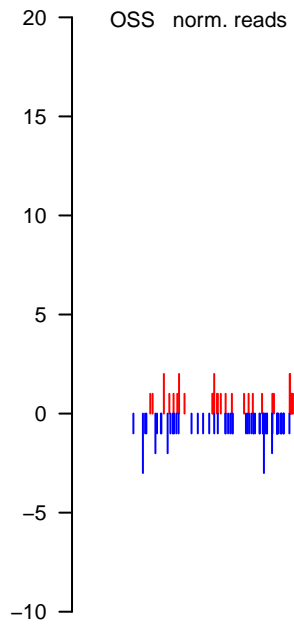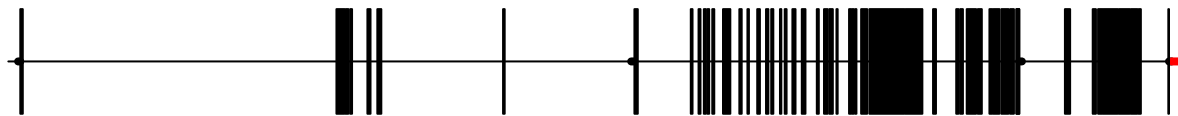

trol X – 2364491 2439423

CG33116 chr 2L : 19533473 - 19537365 +

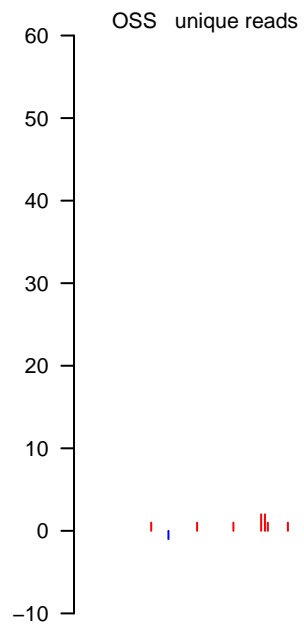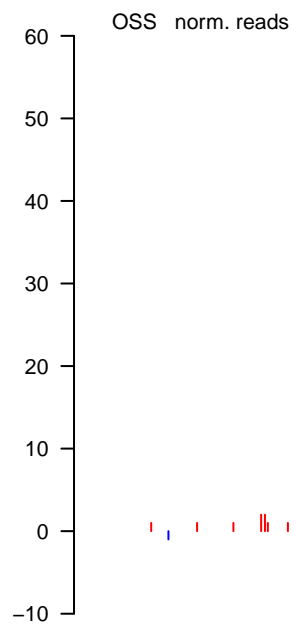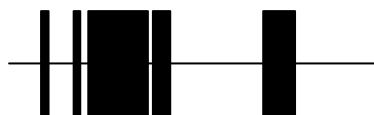

CG33116 2L + 19533473 19537365

grp chr 2L : 16680046 – 16699945 +

OSS unique reads

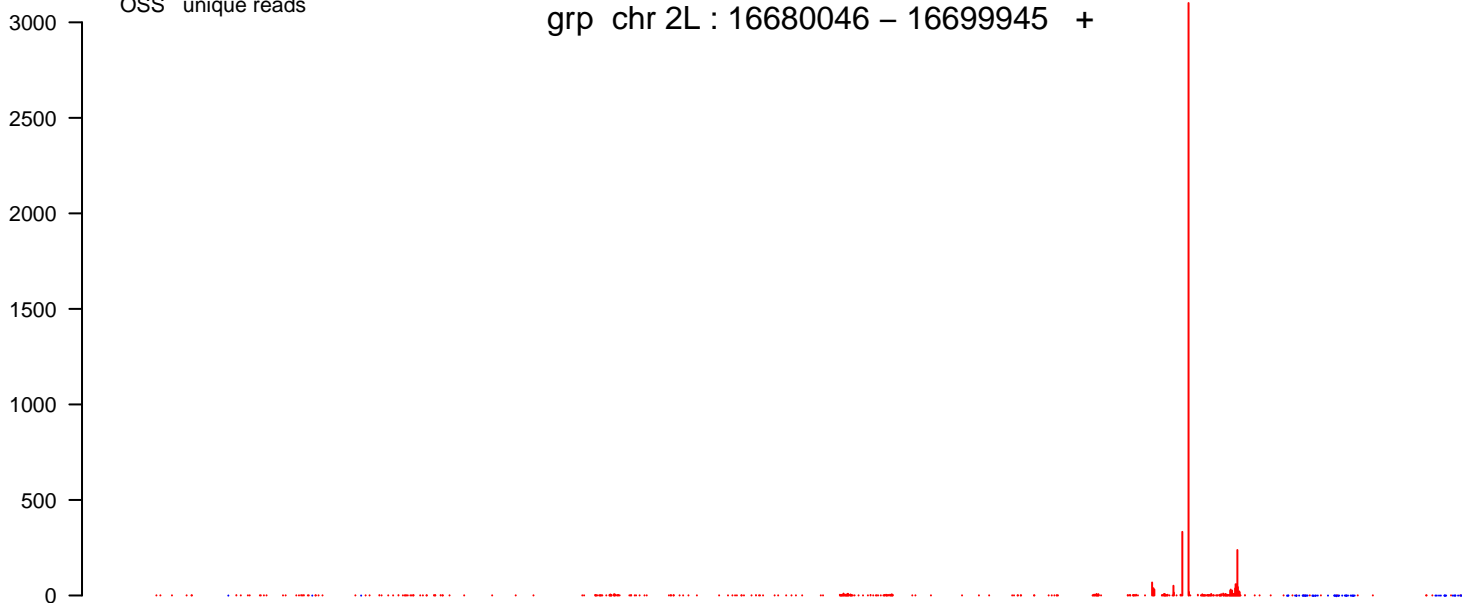

OSS norm. reads

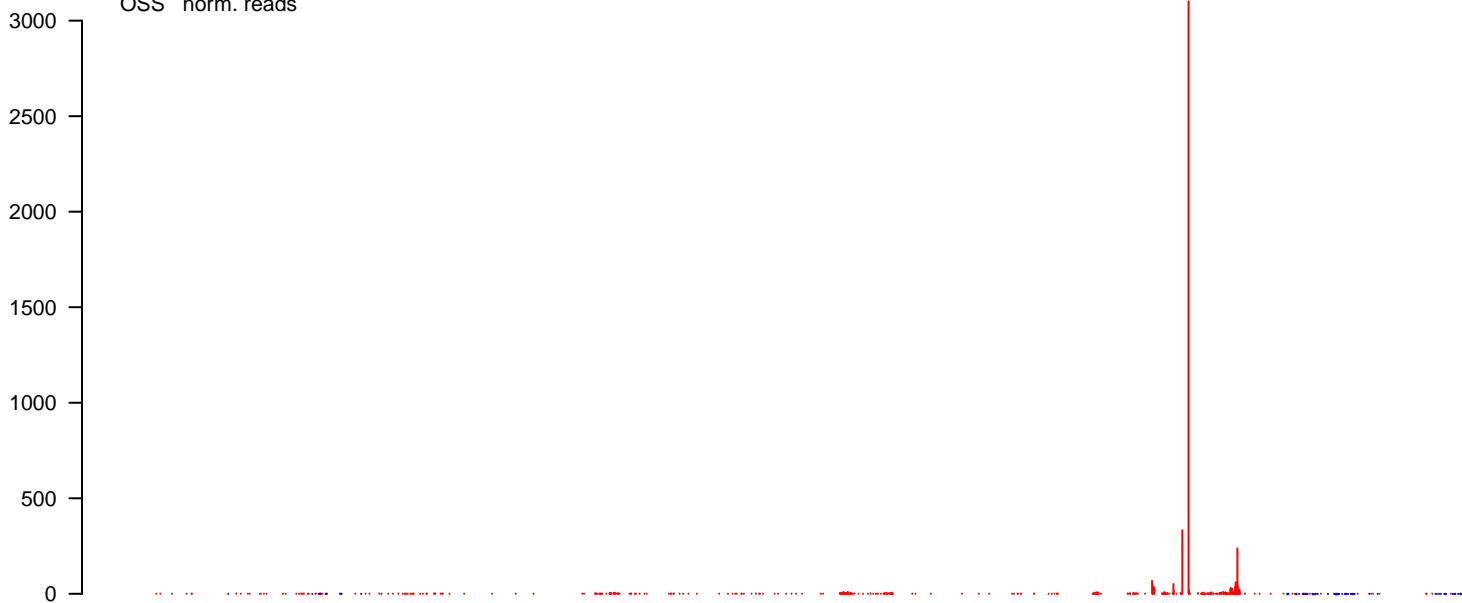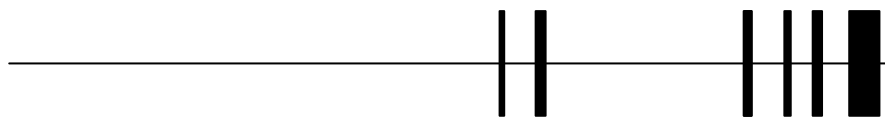

grp 2L + 16680046 16699945



OSS unique reads

NAT1 chr 2R : 8803502 – 8811242 +

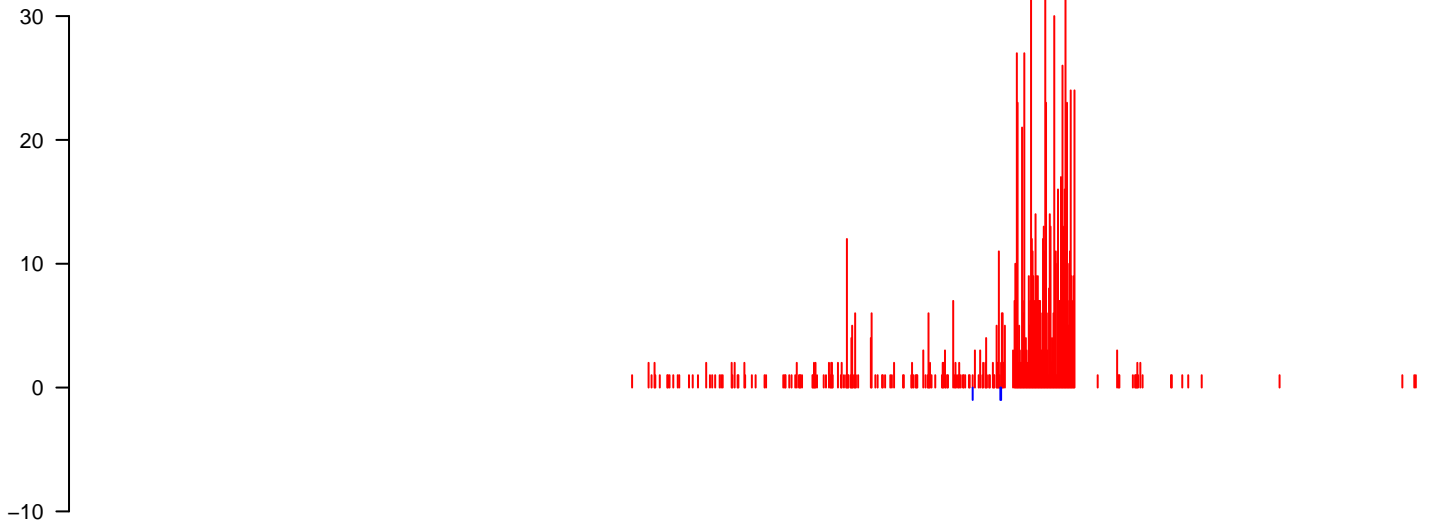

OSS norm. reads

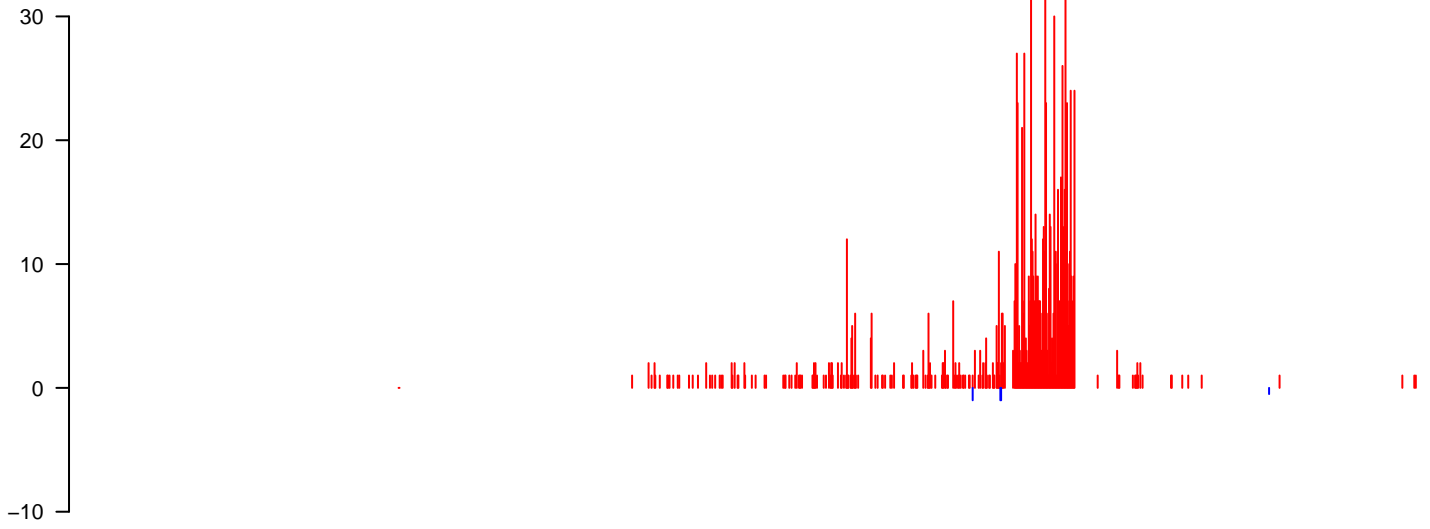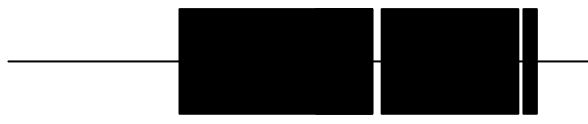

NAT1 2R + 8803502 8811242

OSS unique reads

CG12099 chr 3L : 1555308 – 1558454 –

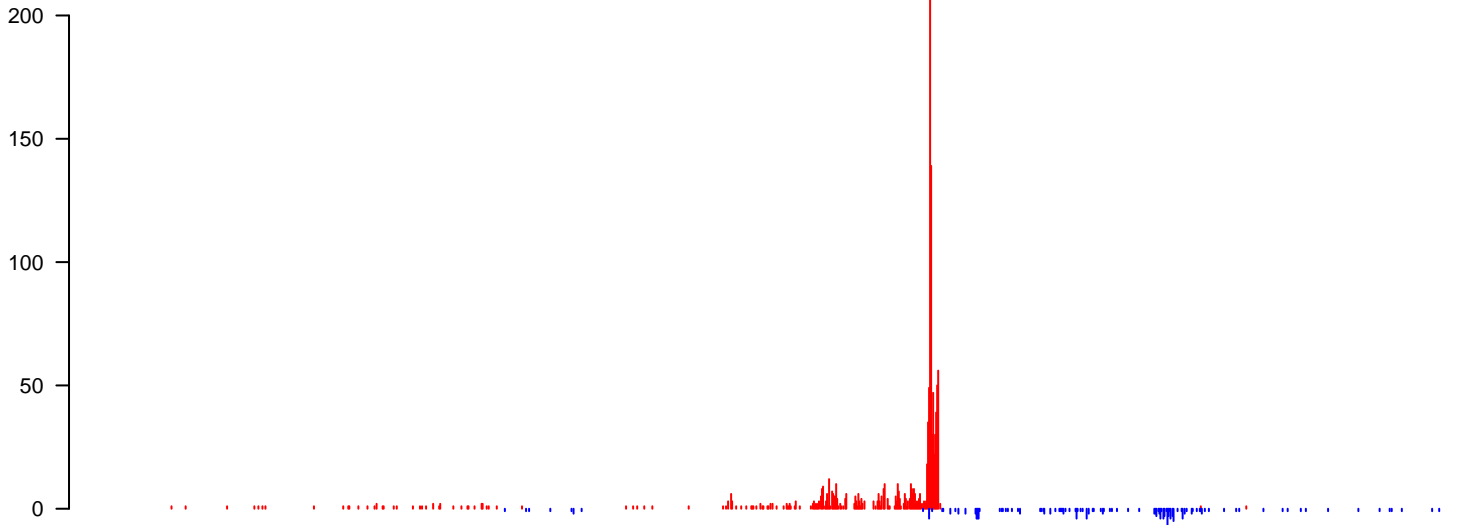

OSS norm. reads

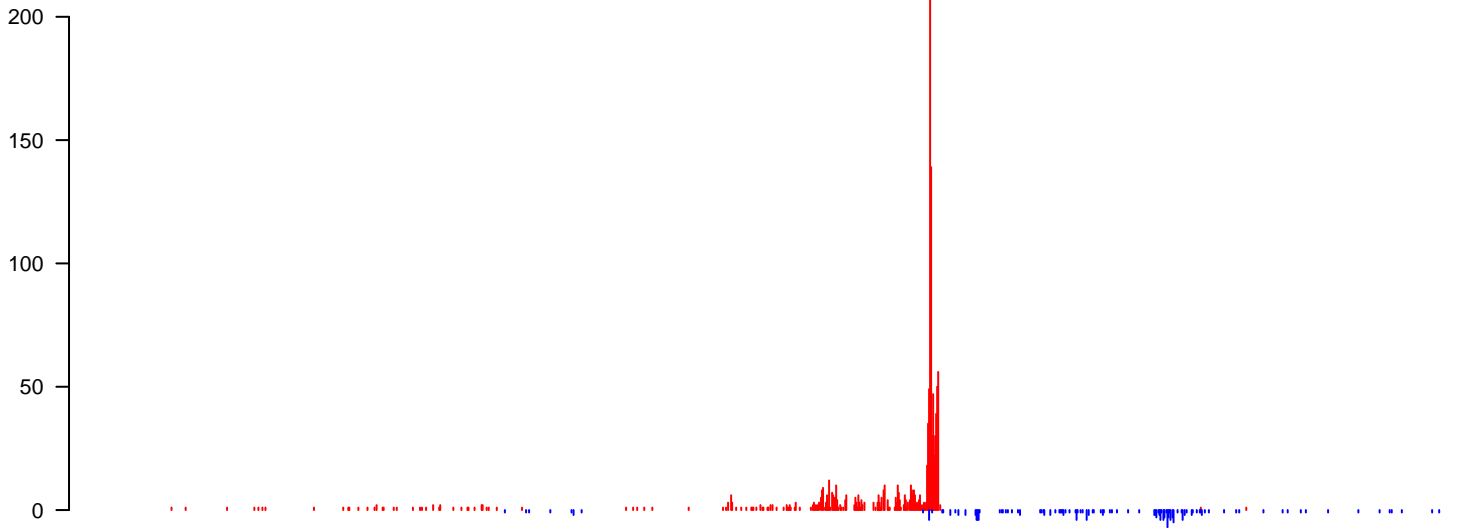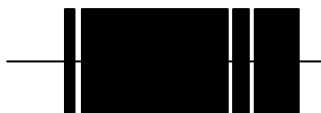

CG12099 3L – 1555308 1558454

Oda chr 2R : 8053654 – 8061767 –

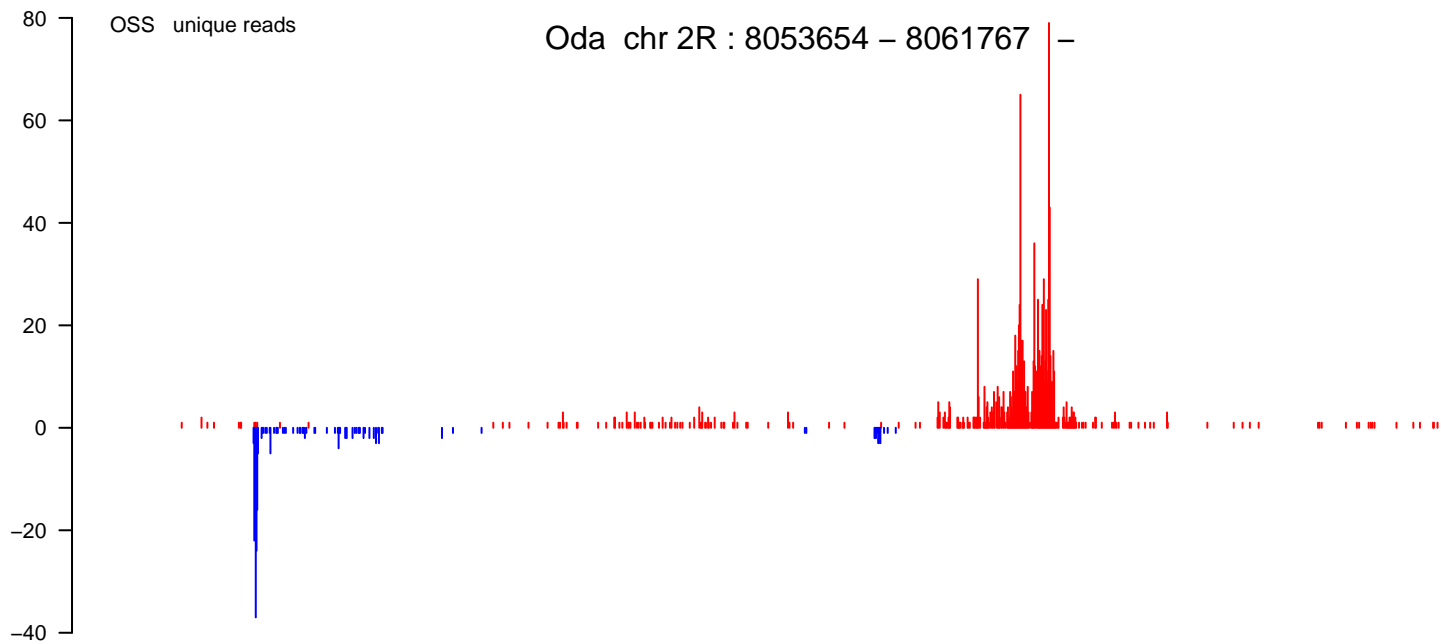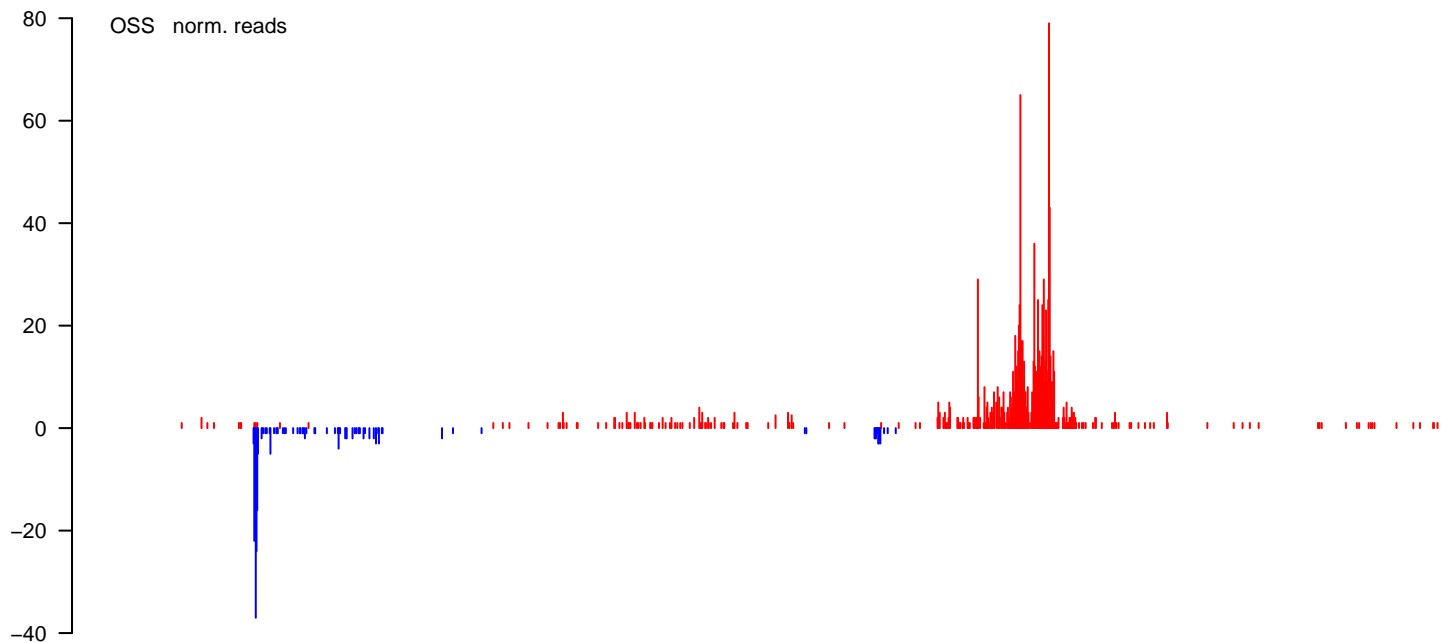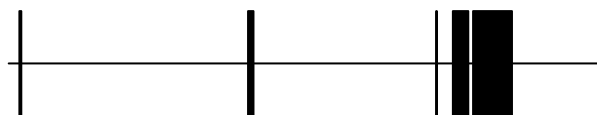

OSS unique reads

sqd chr 3R : 9460576 – 9472026 –

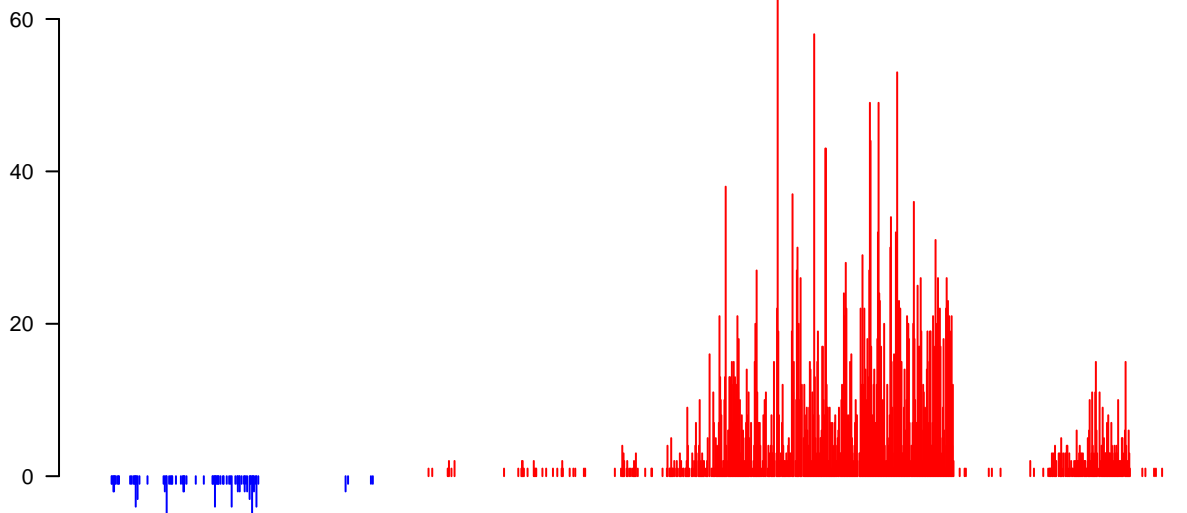

OSS norm. reads

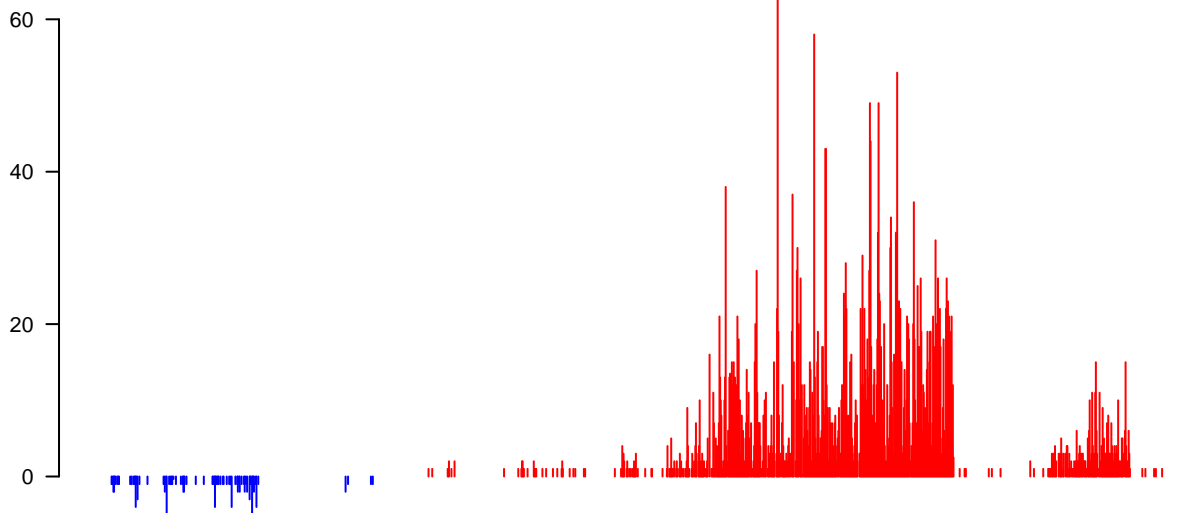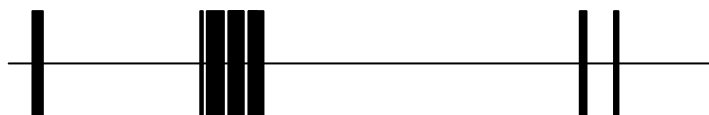

sqd 3R – 9460576 9472026

OSS unique reads

CG11750 chr X : 11253270 – 11255933 +

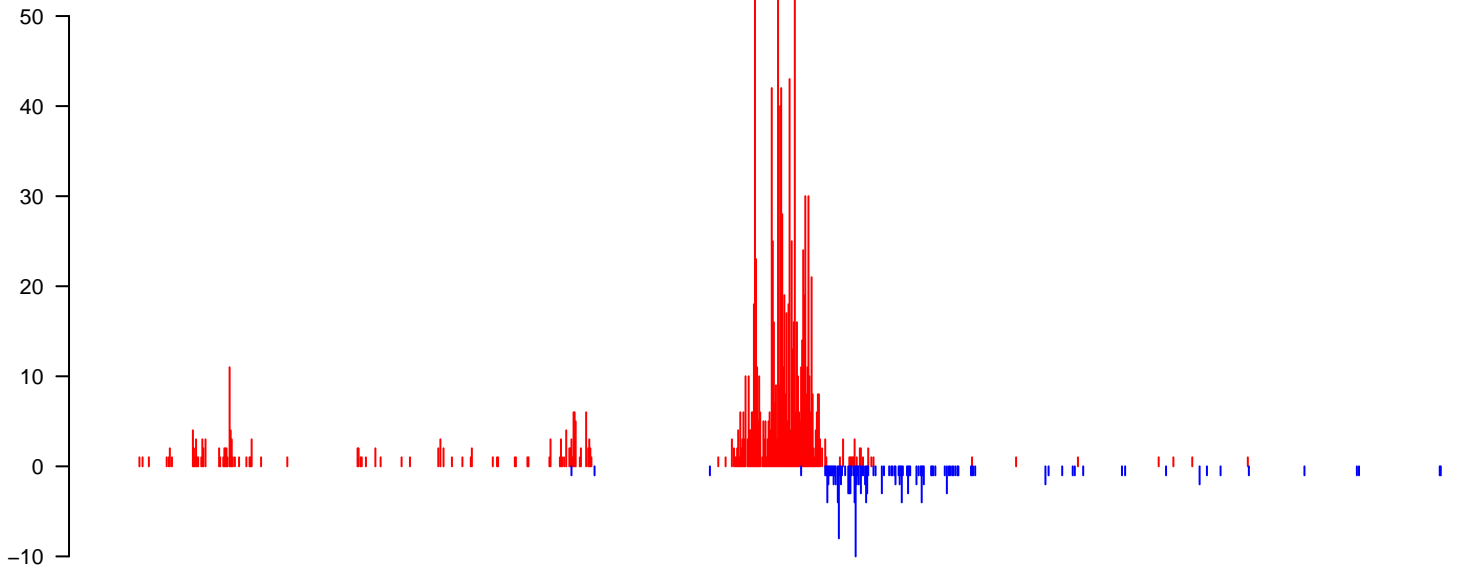

OSS norm. reads

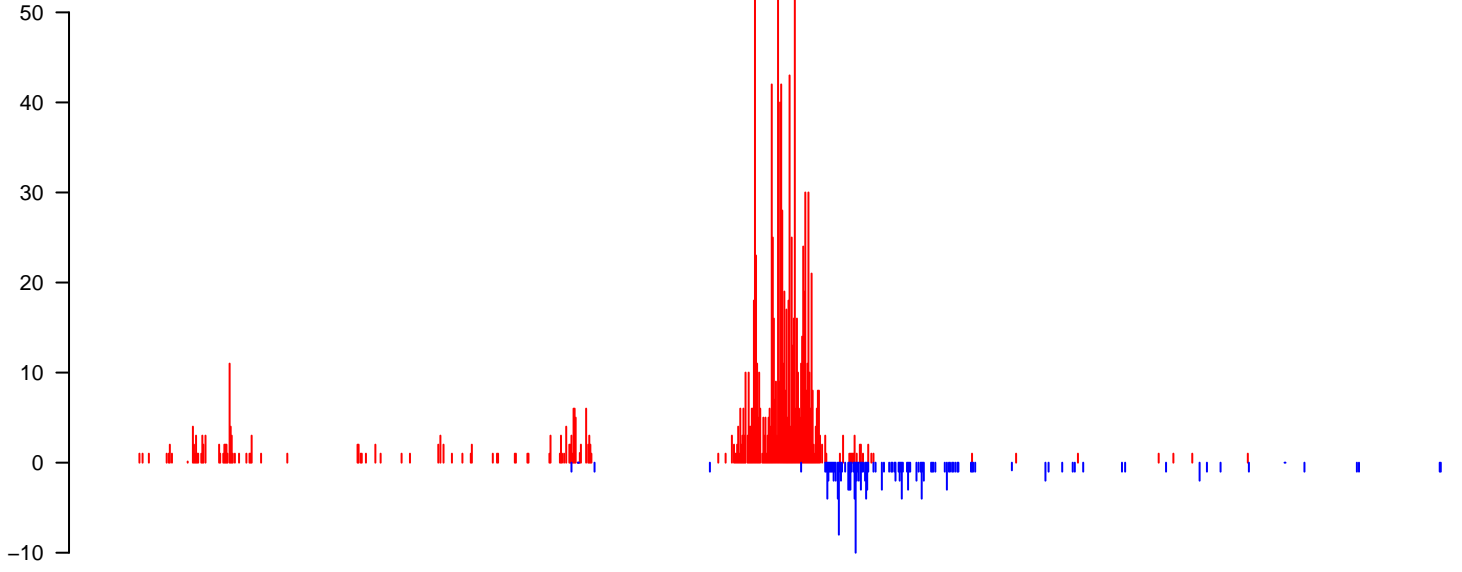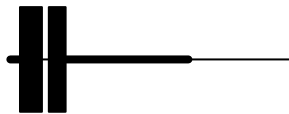

CG11750 X + 11253270 11255933

CG12290 chr 3R : 22055974 – 22060473 +

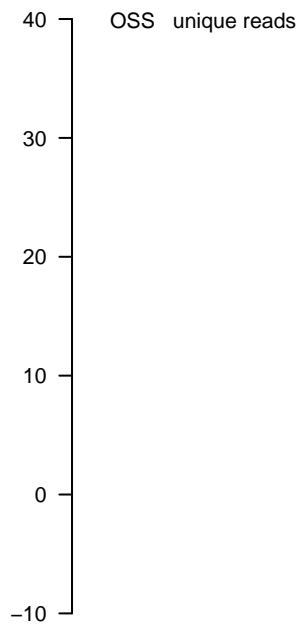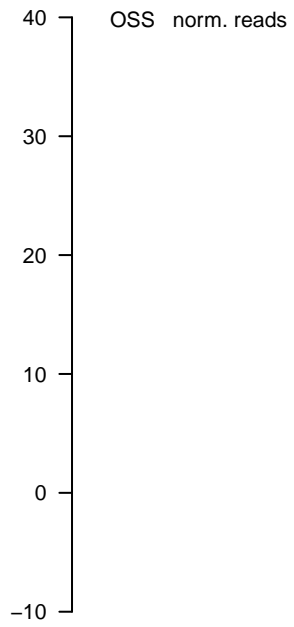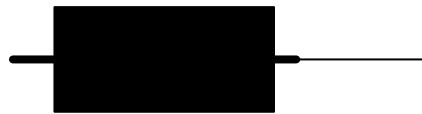

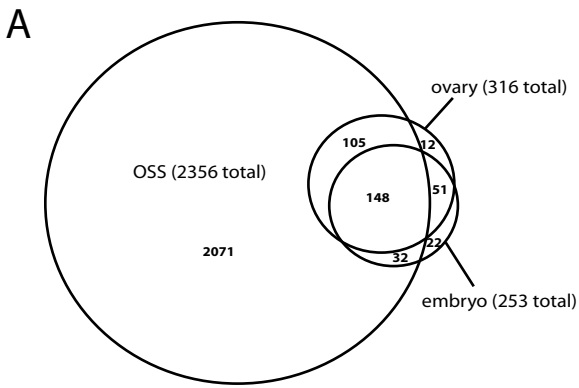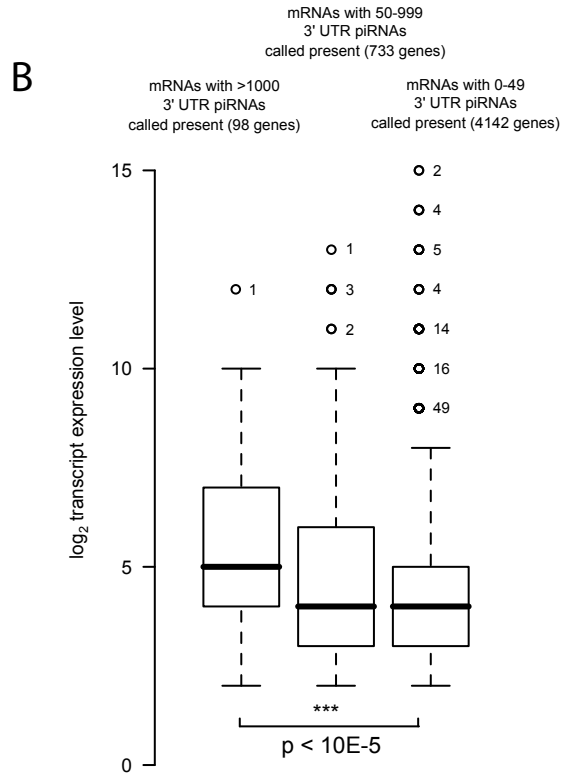

# Supplemental Data

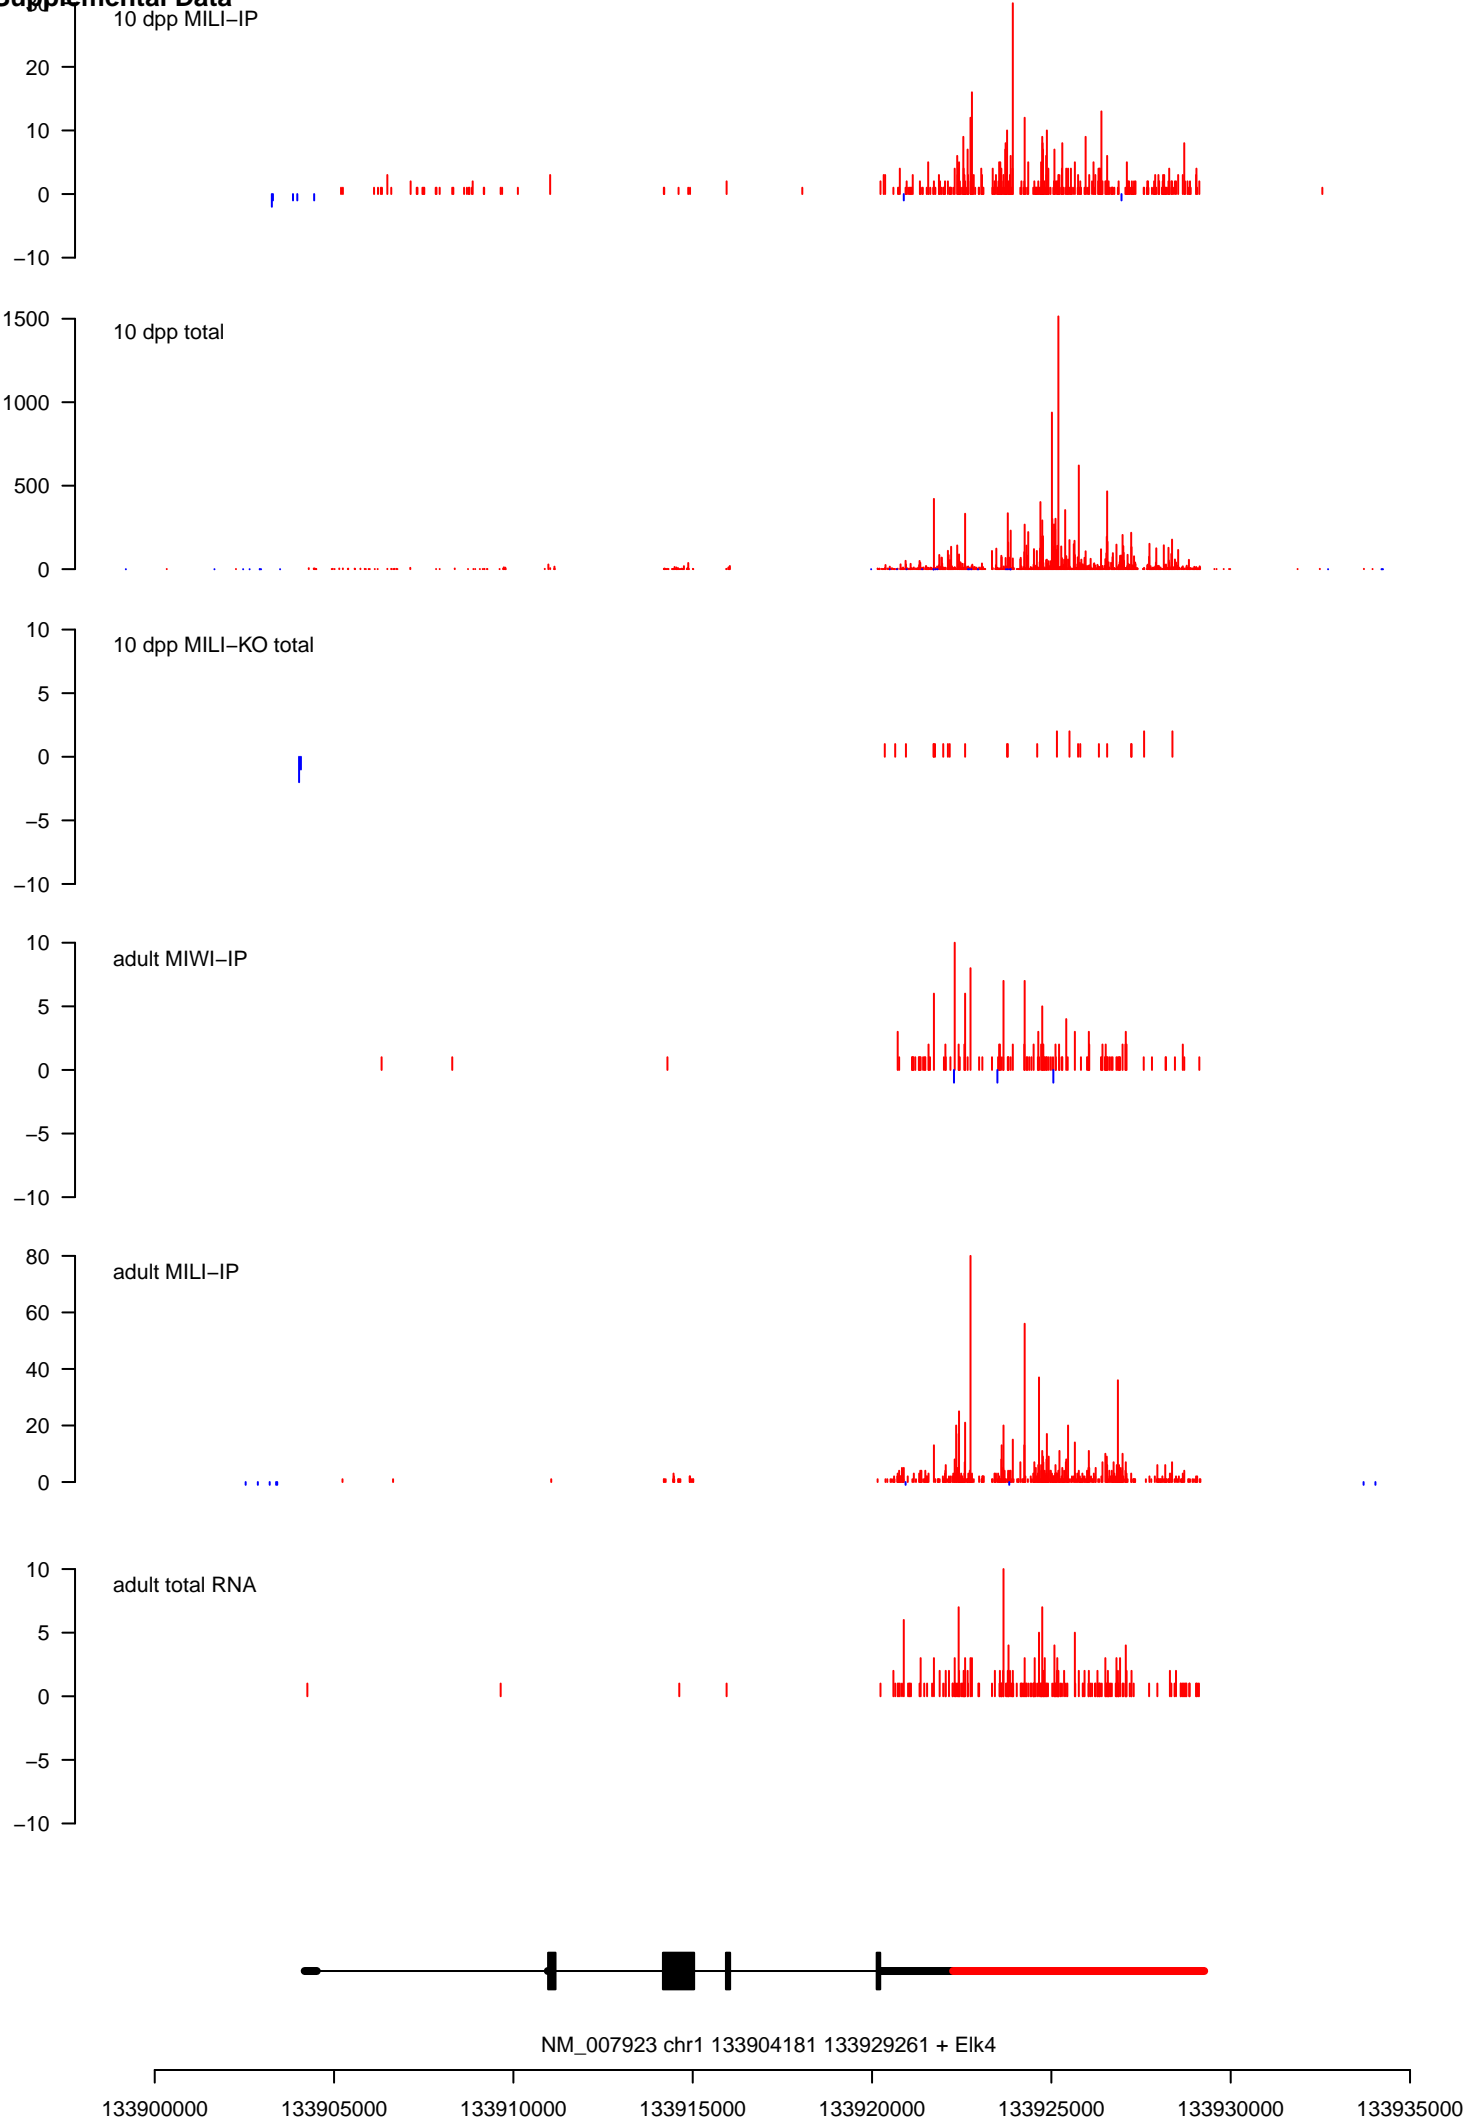



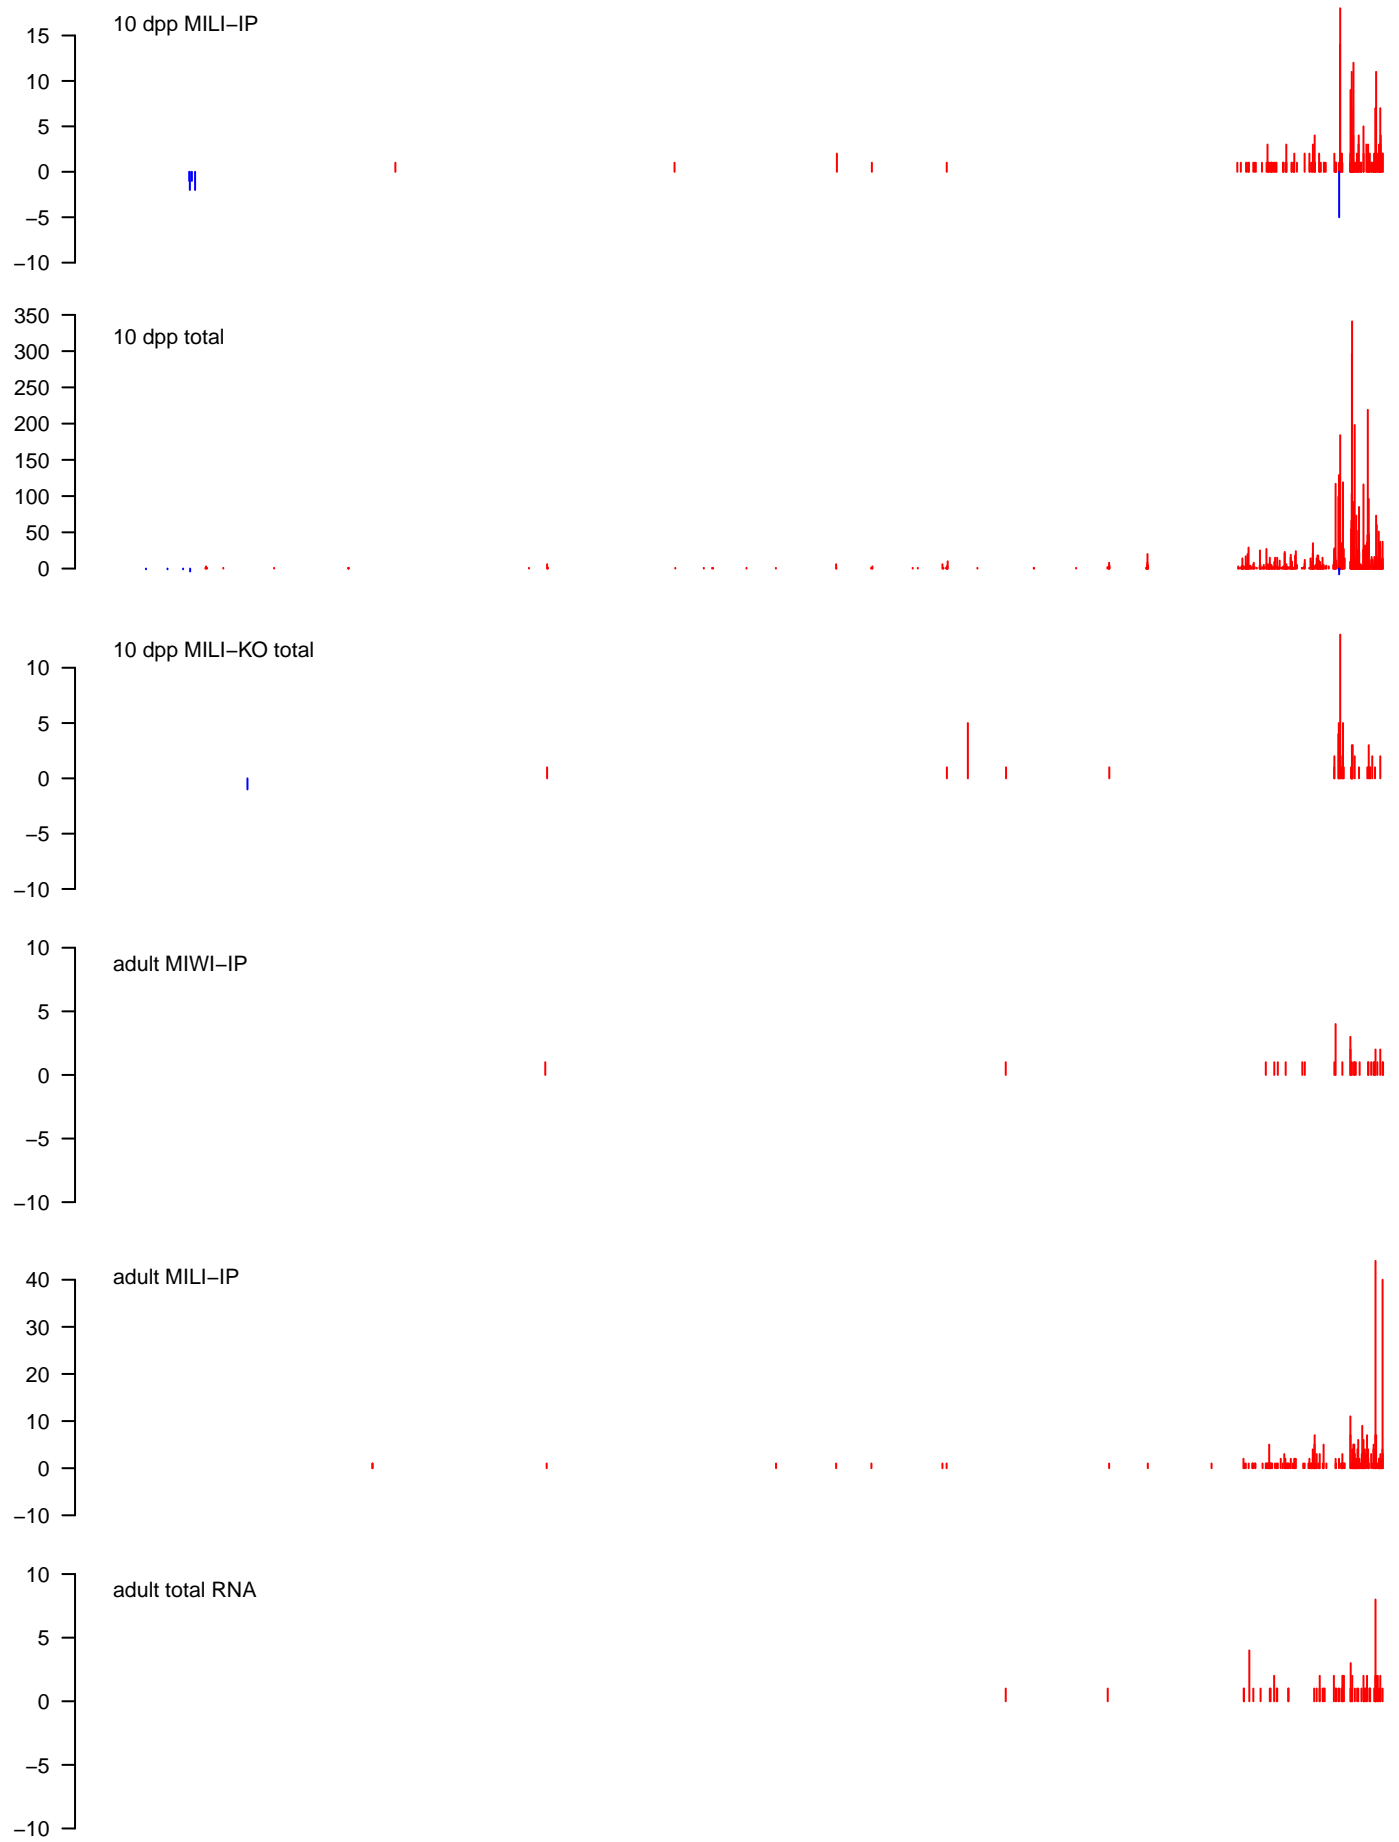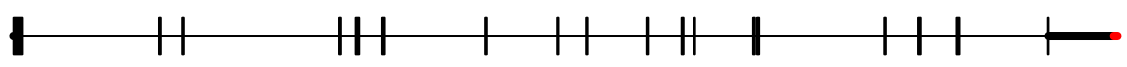

NM\_175518 chr4 56888634 56960301 - D730040F13Rik

56900000 56920000 56940000 56960000

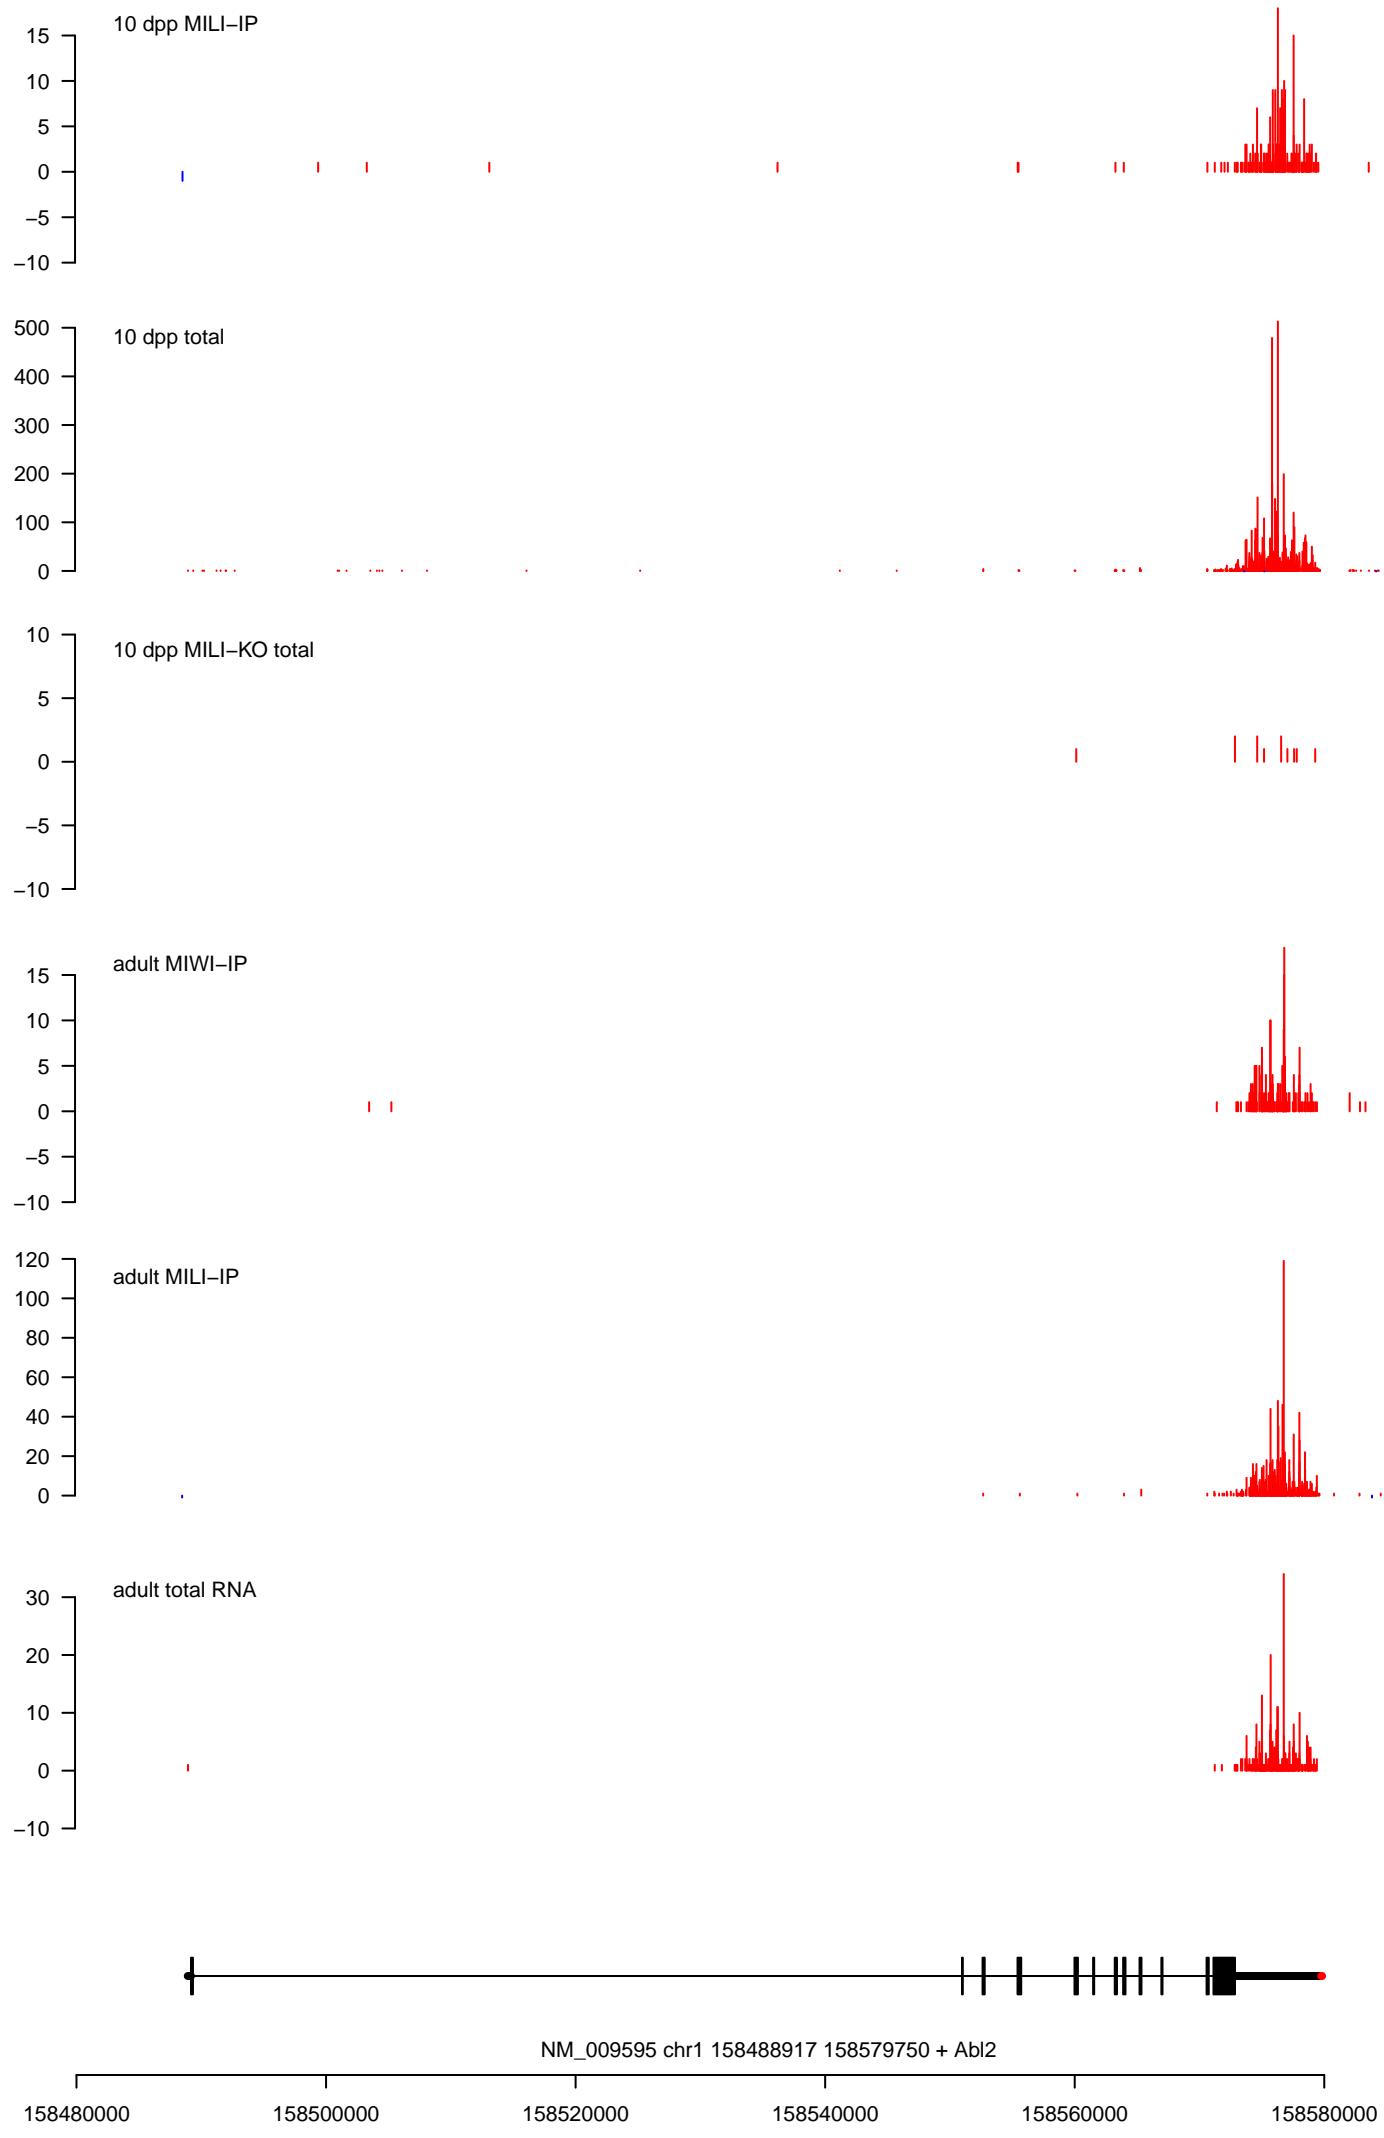

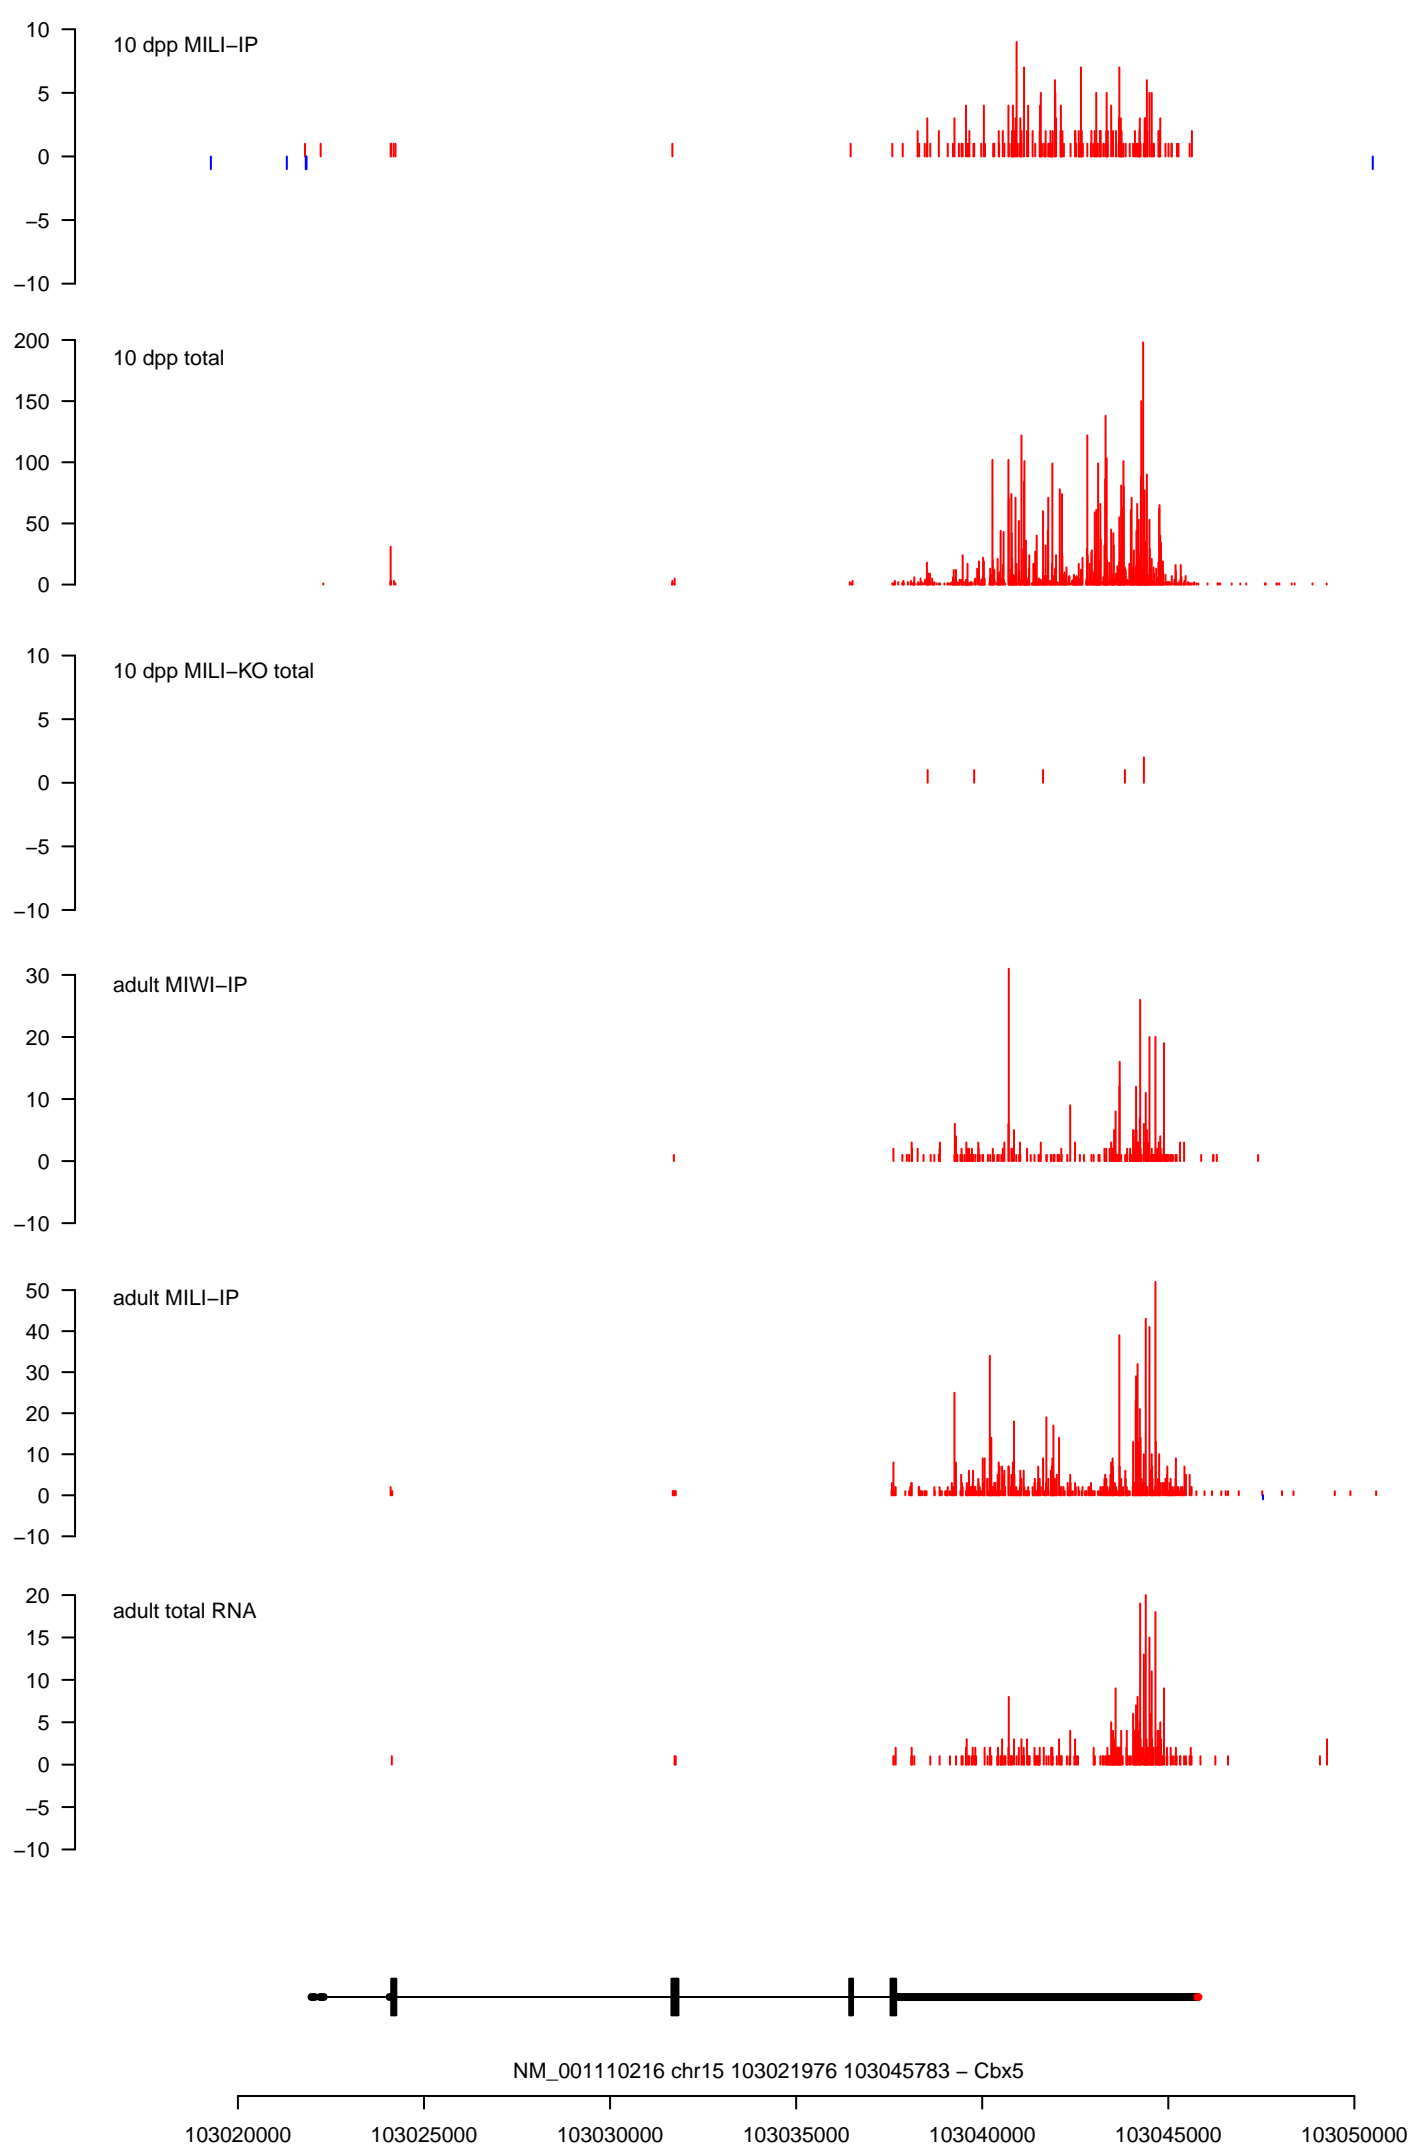

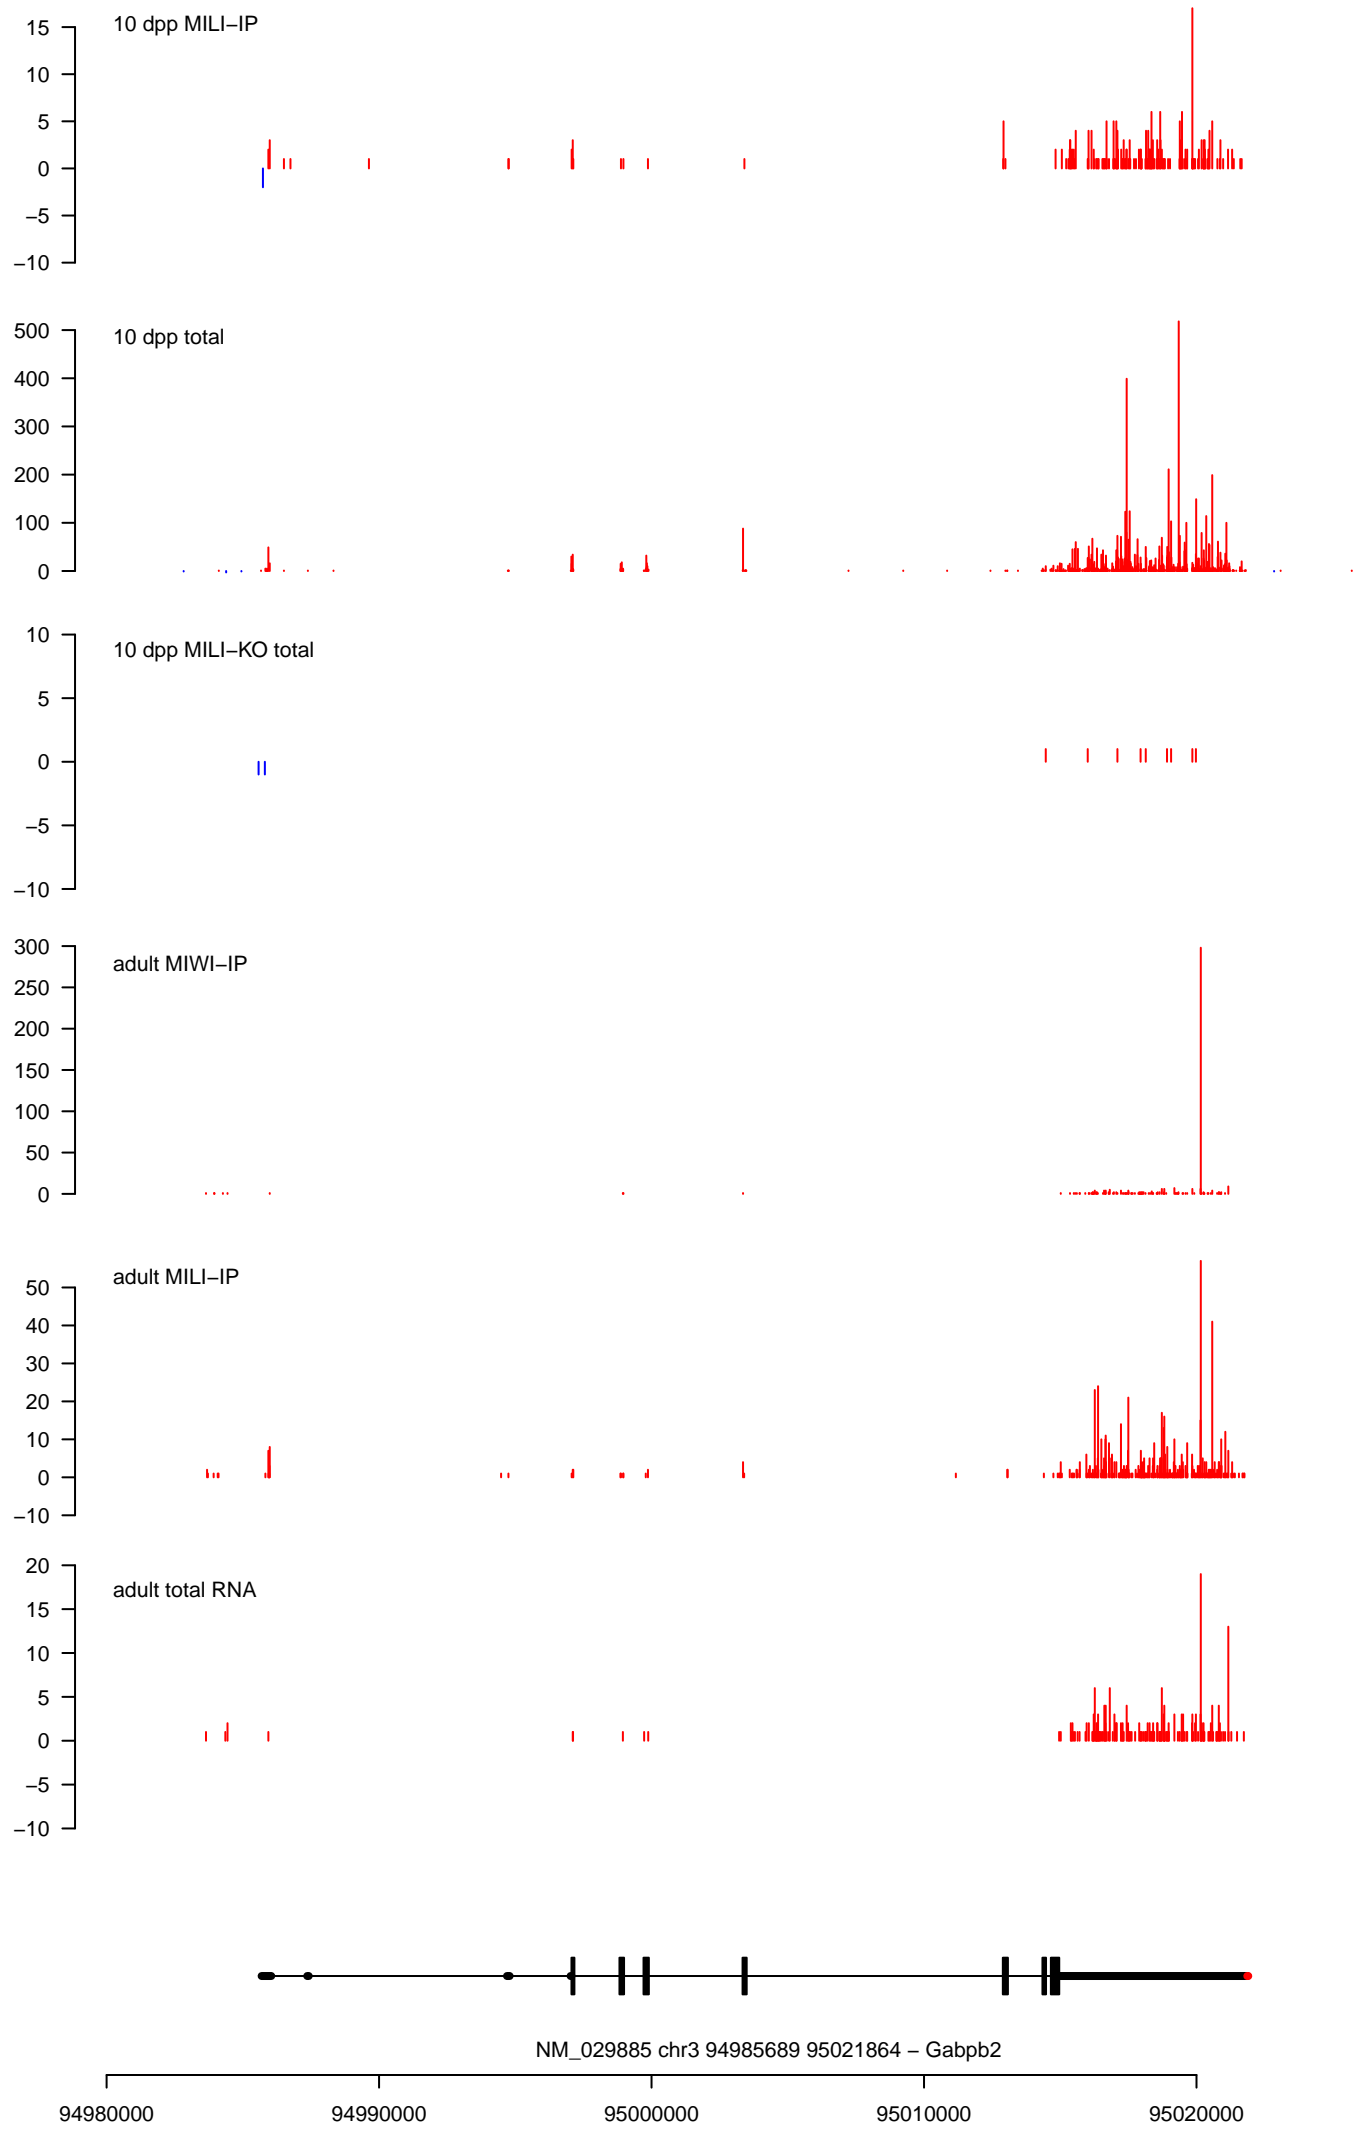

NM\_029885 chr3 94985689 95021864 - Gabpb2

94980000

94990000

95000000

95010000

95020000

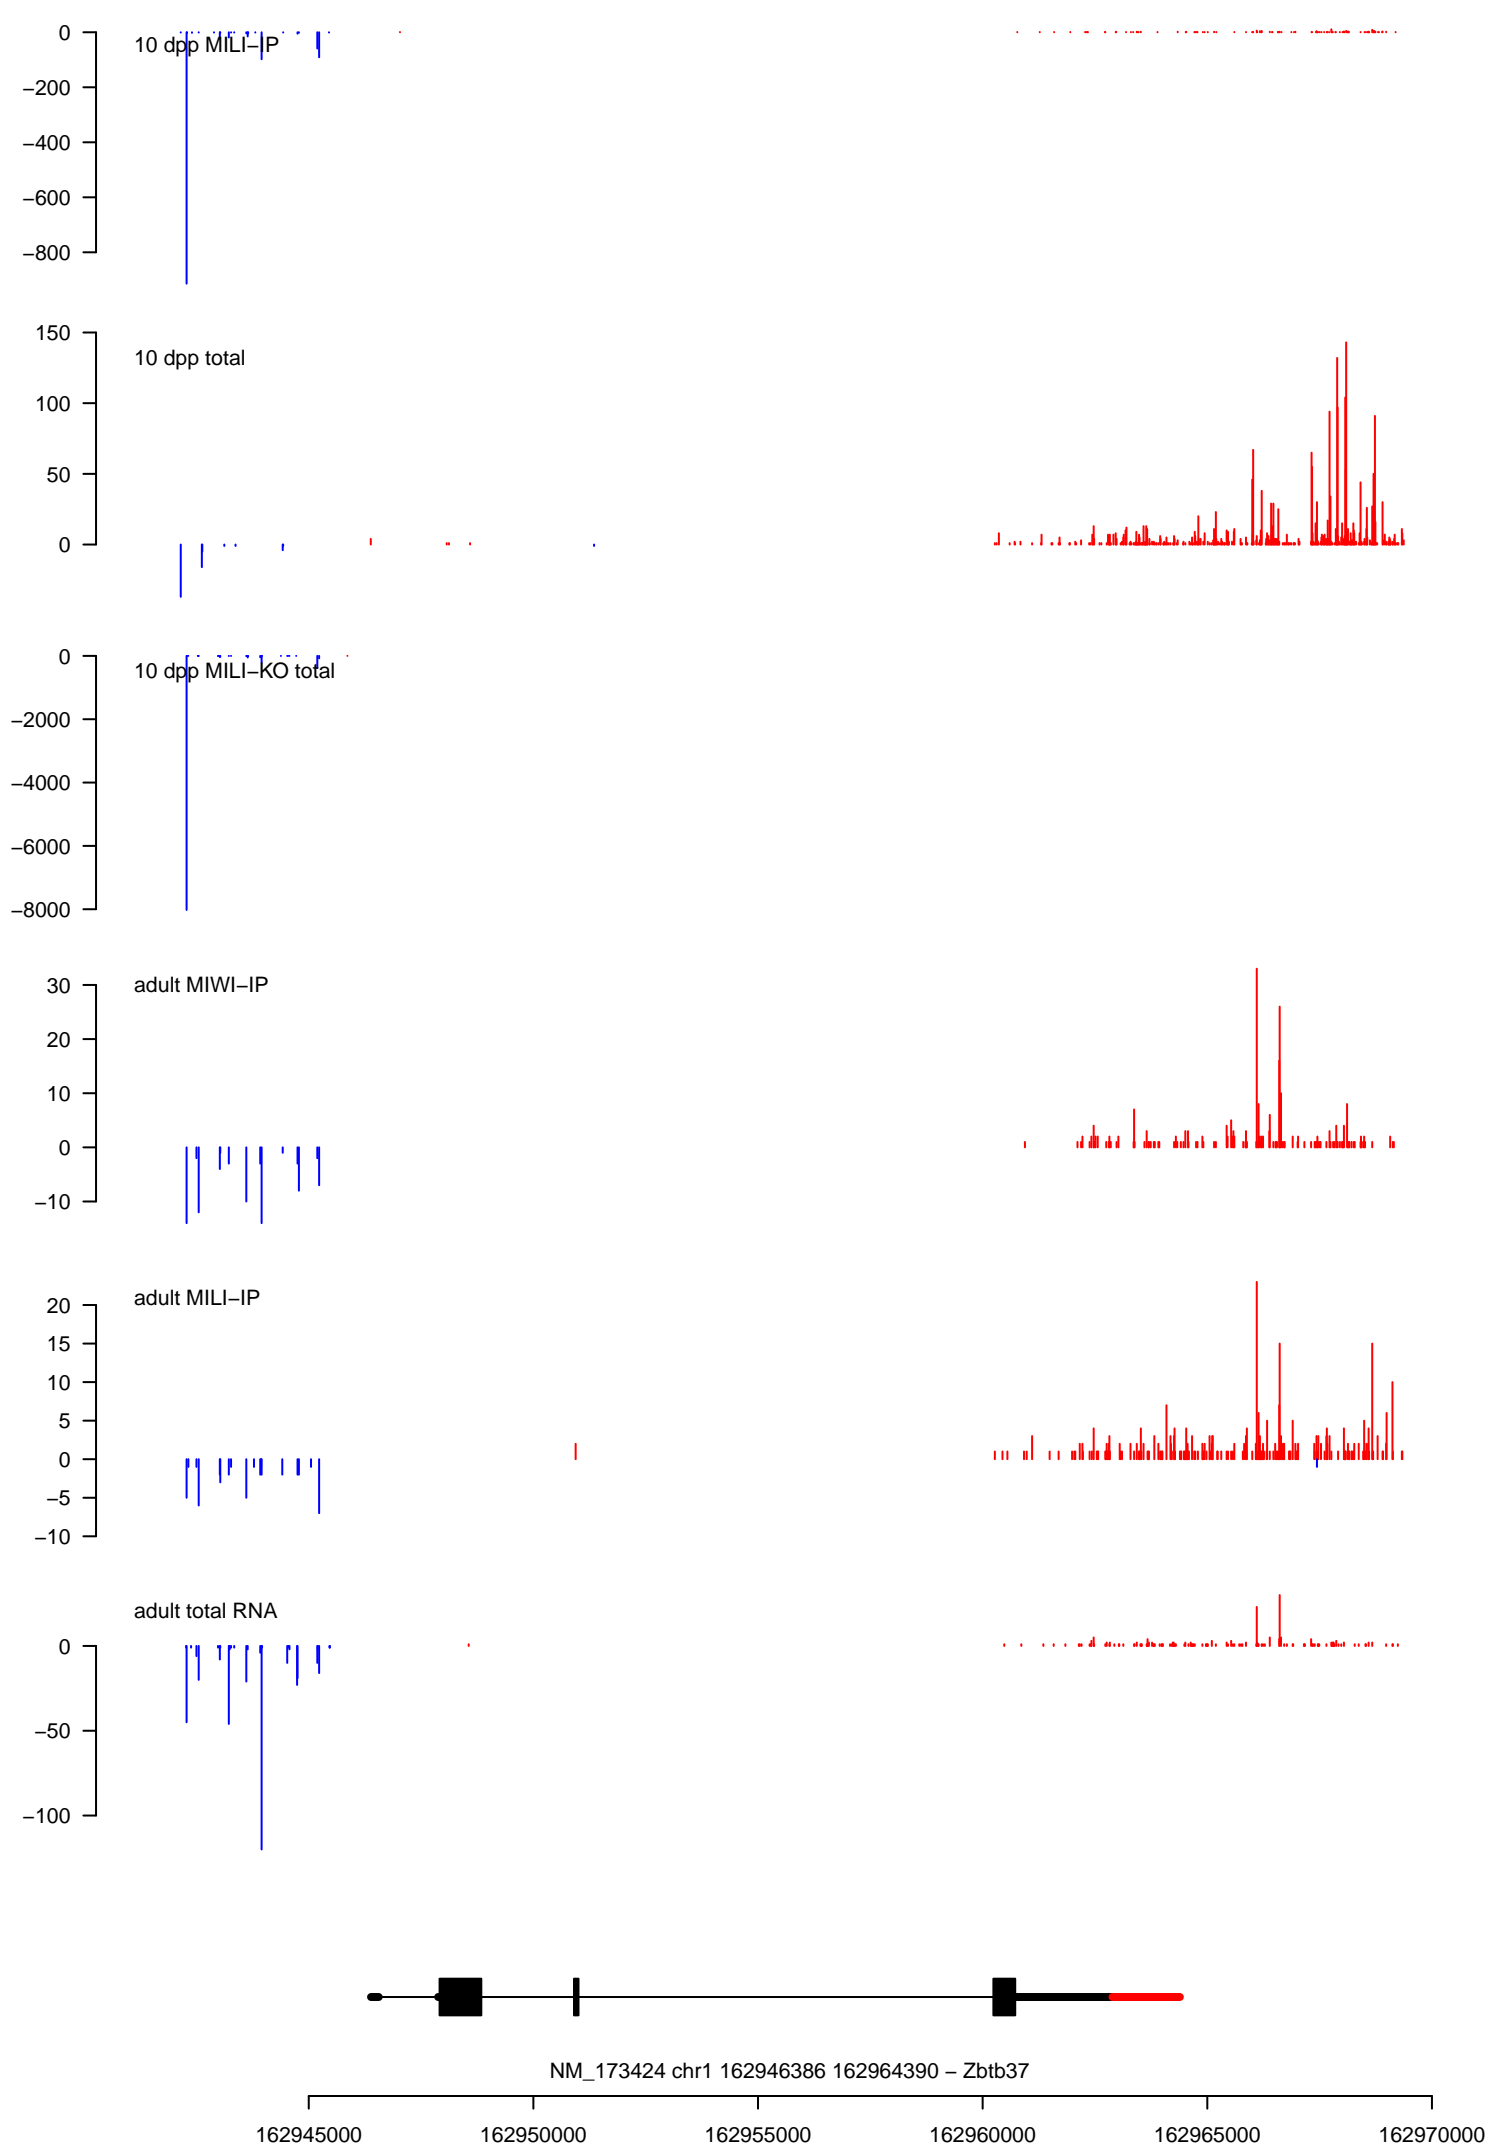

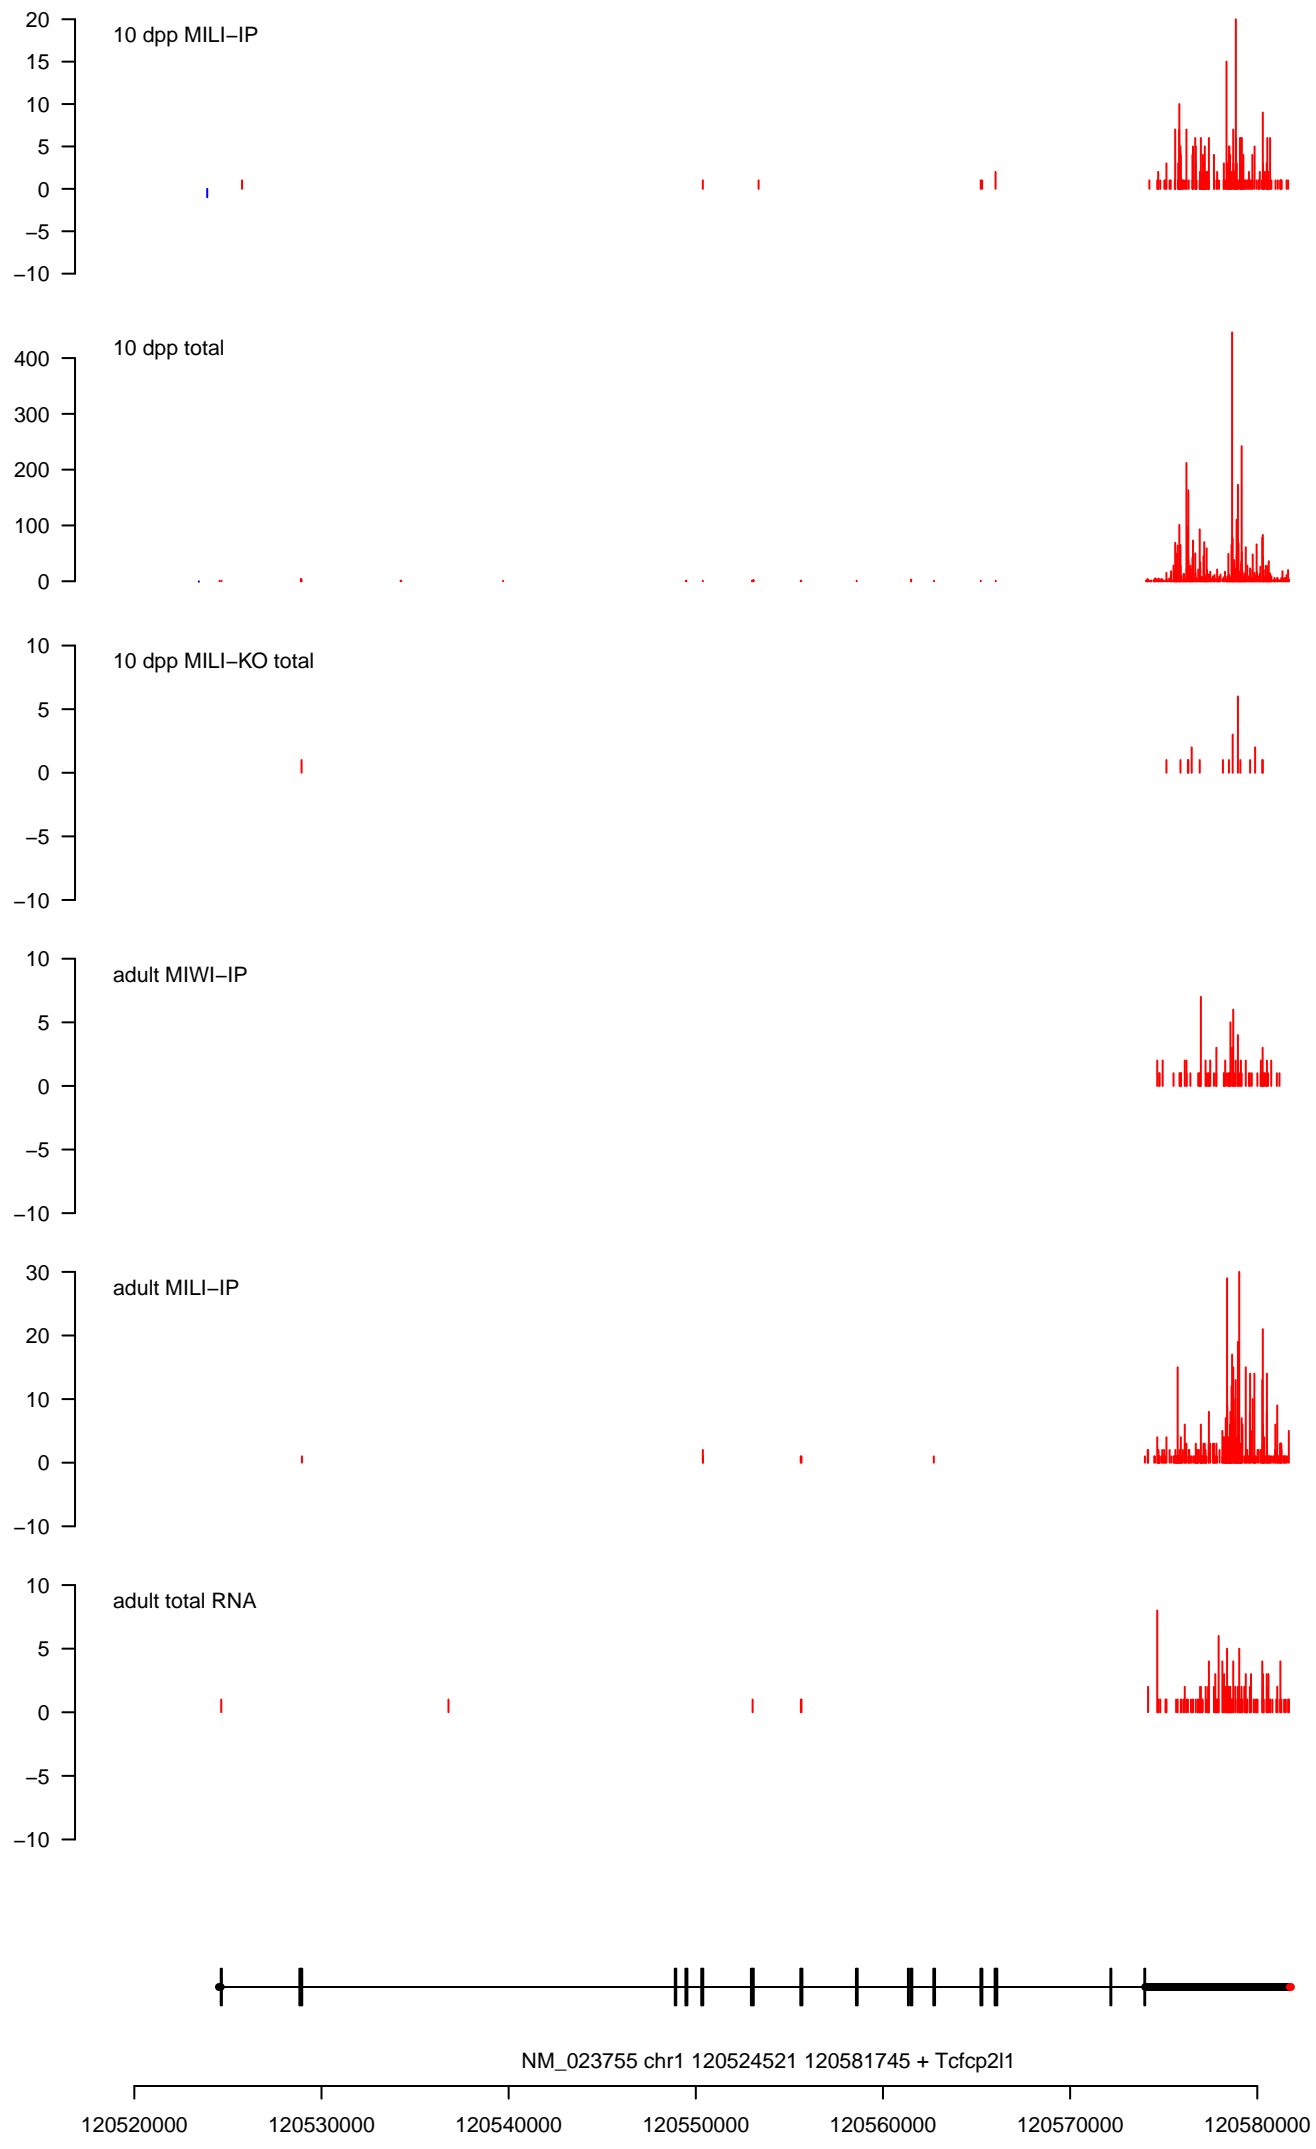

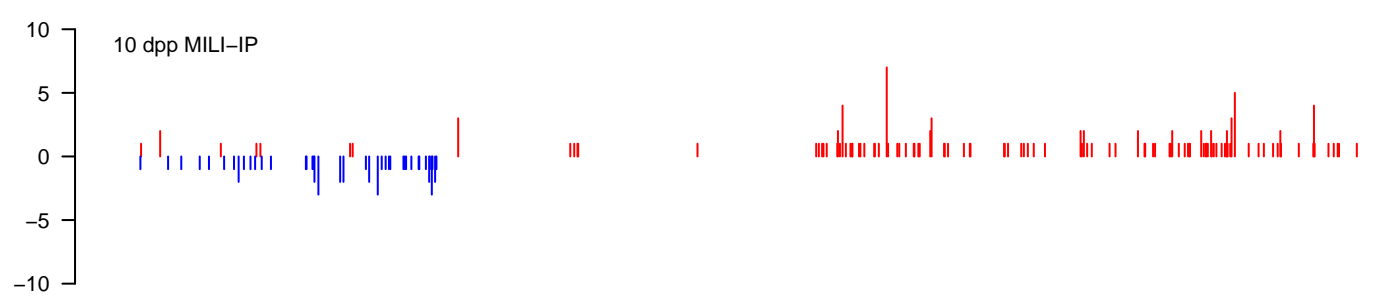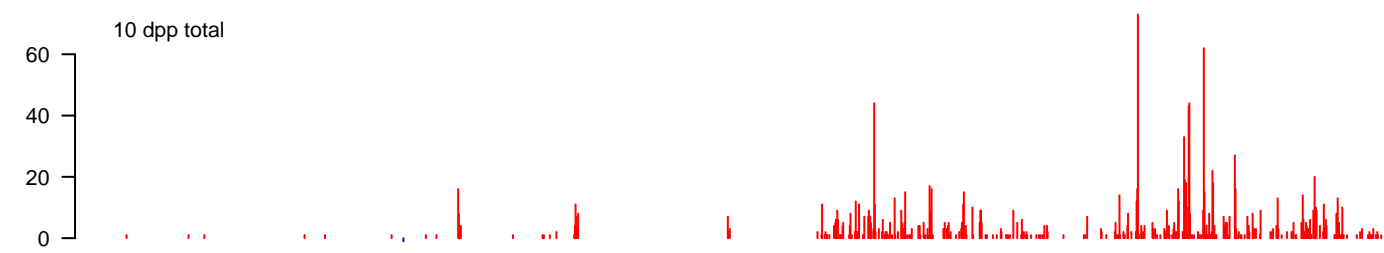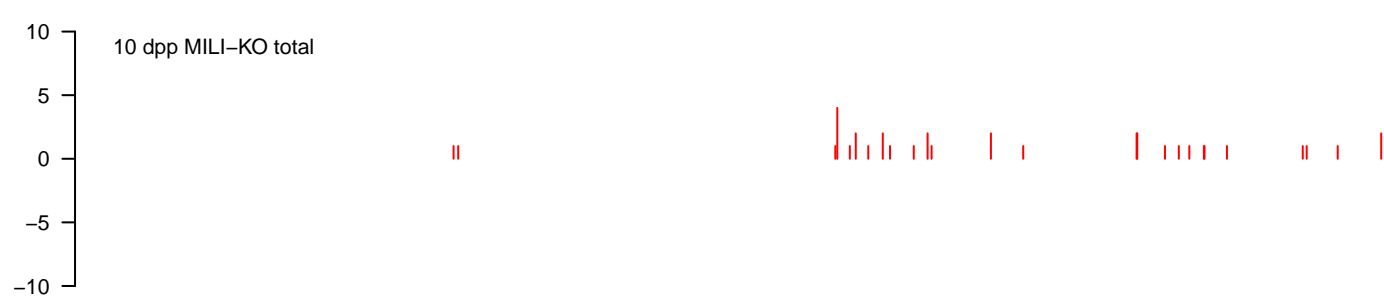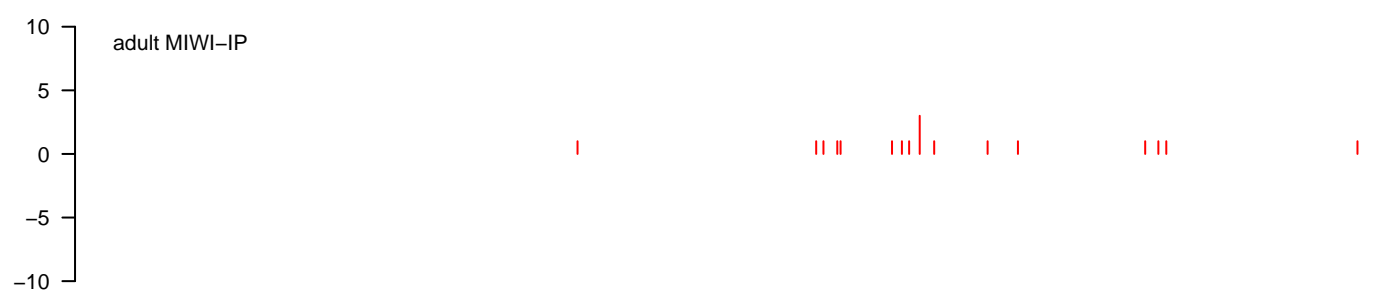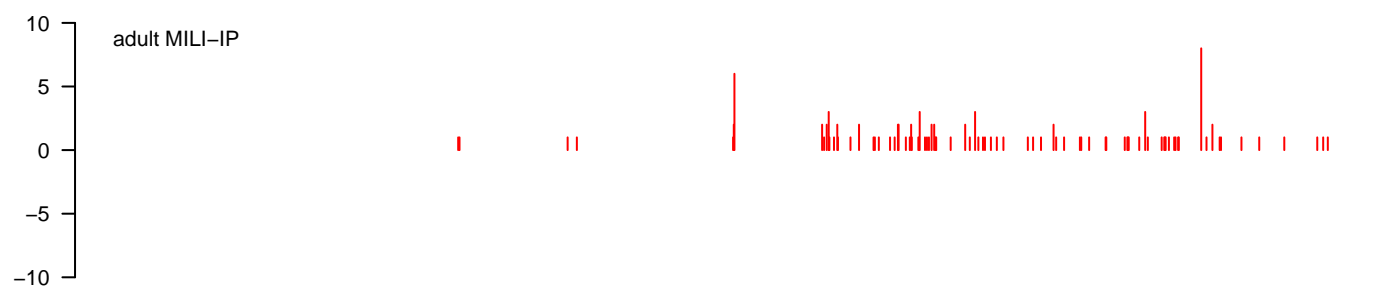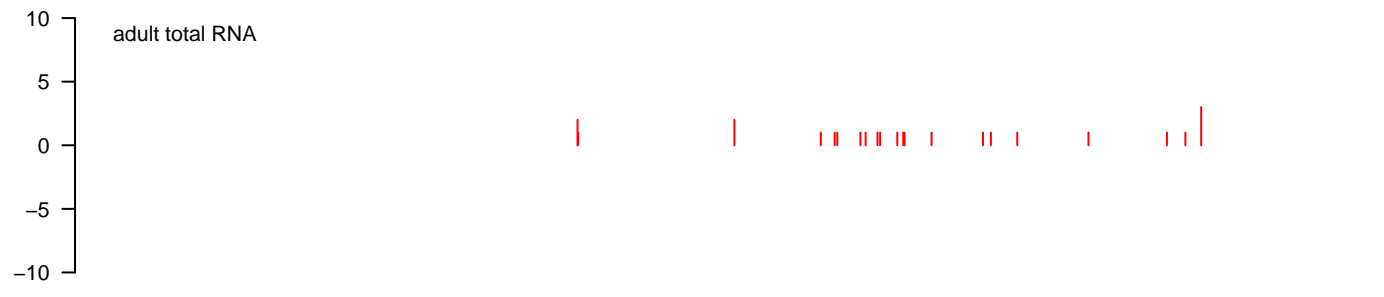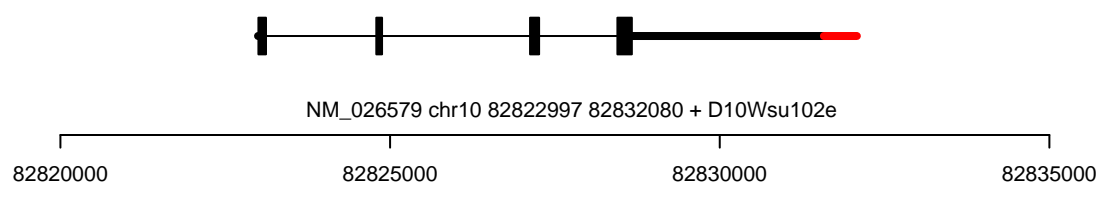

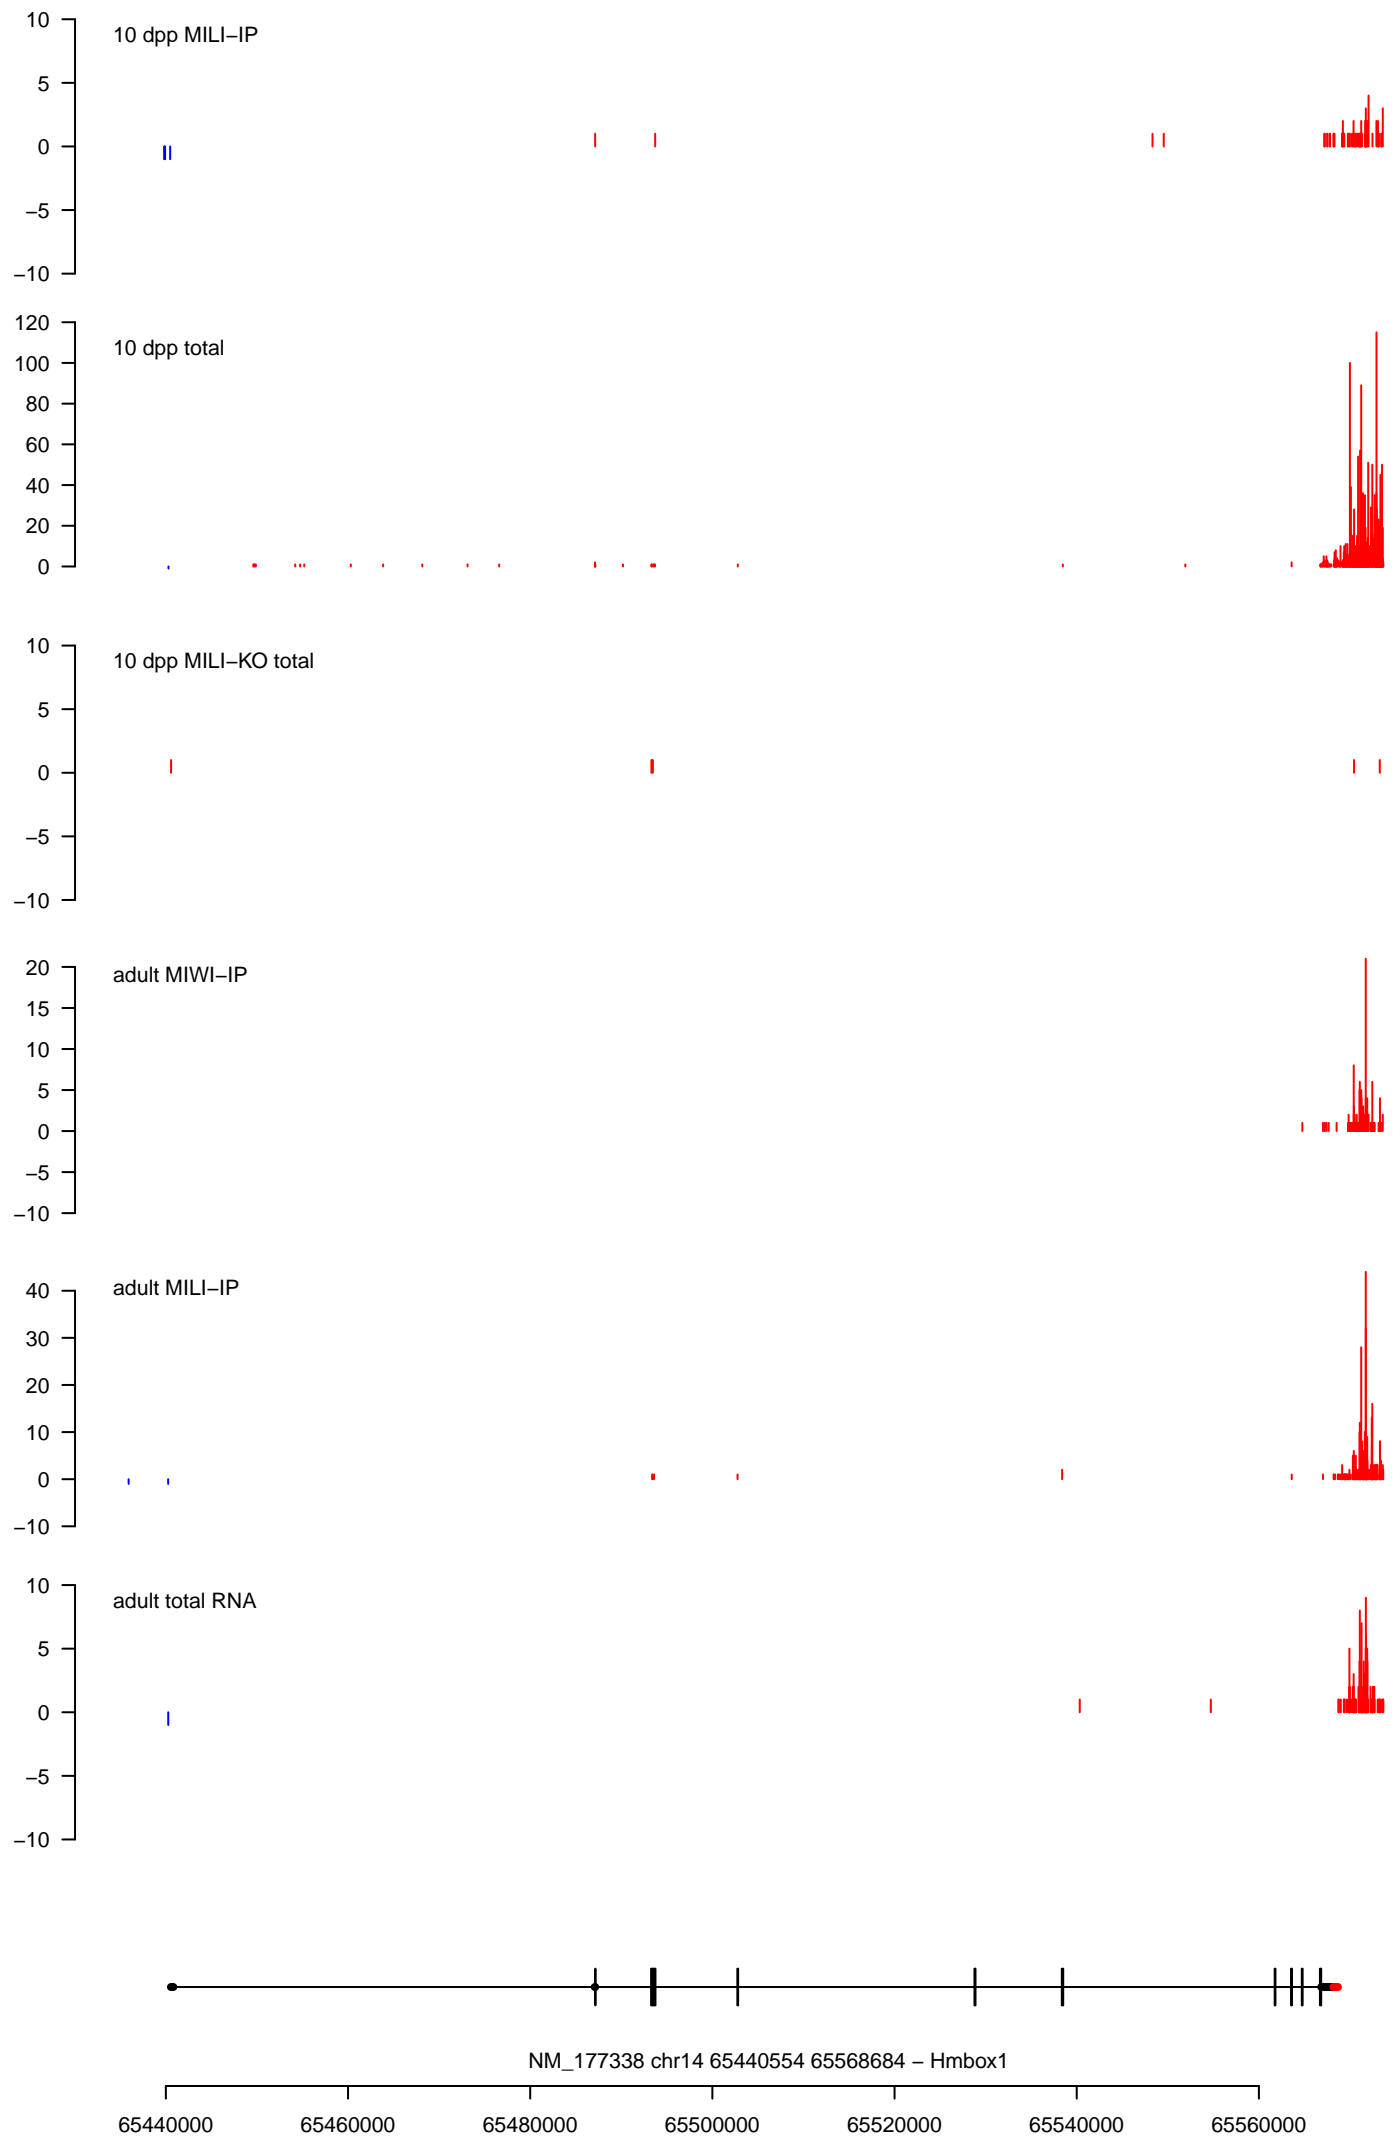



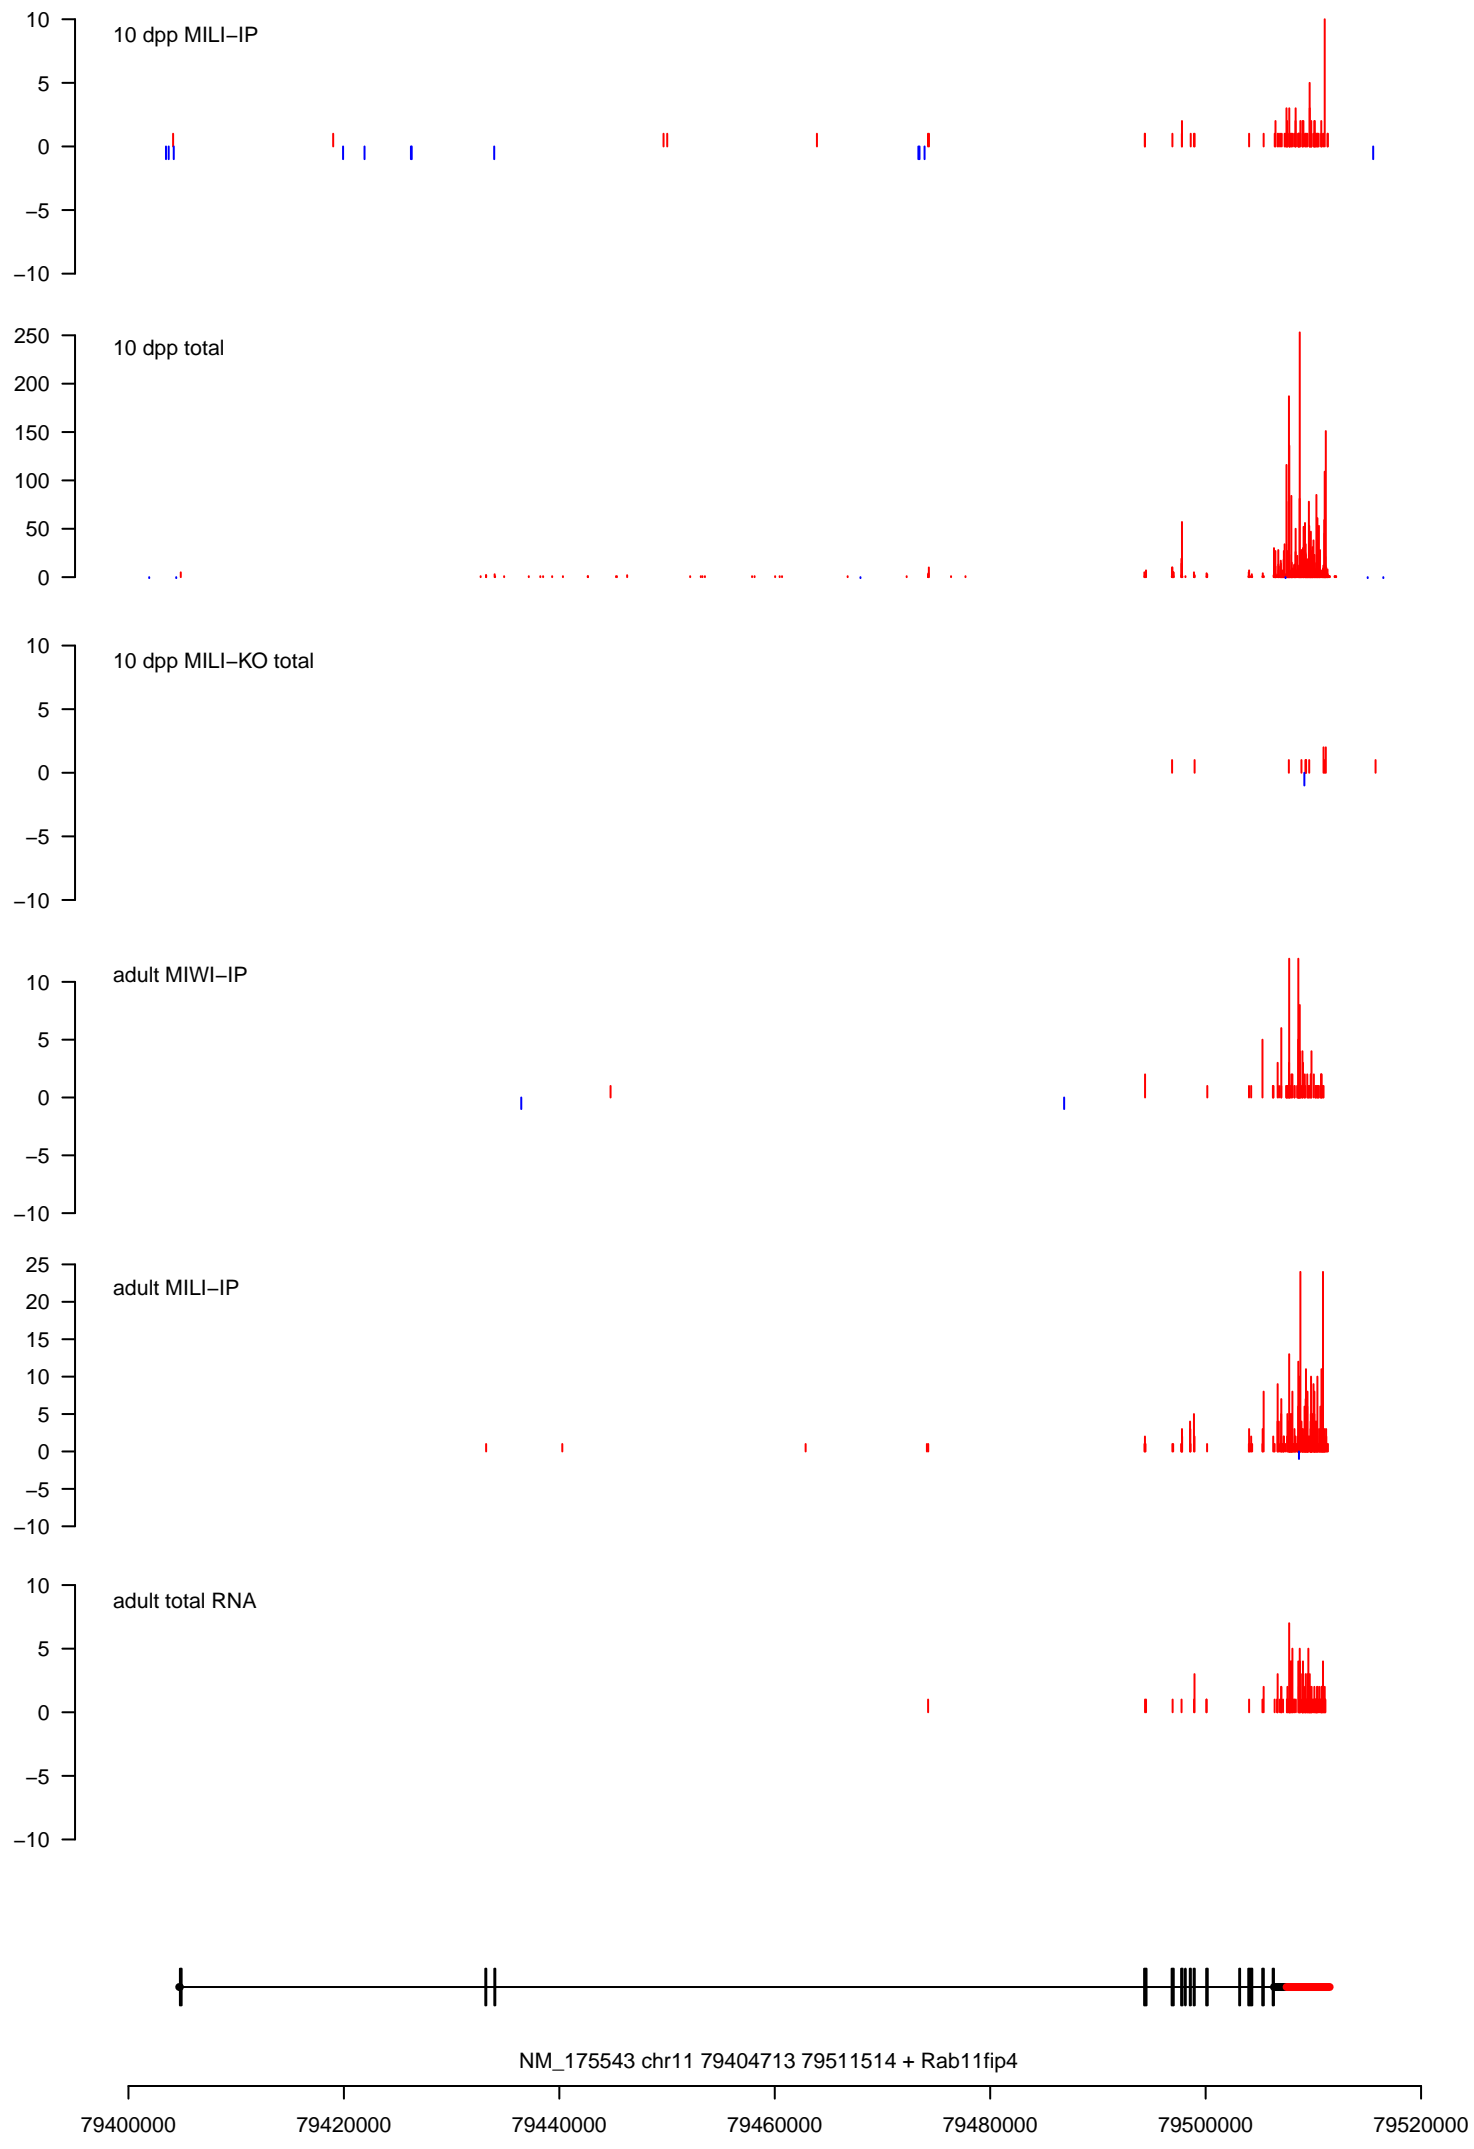

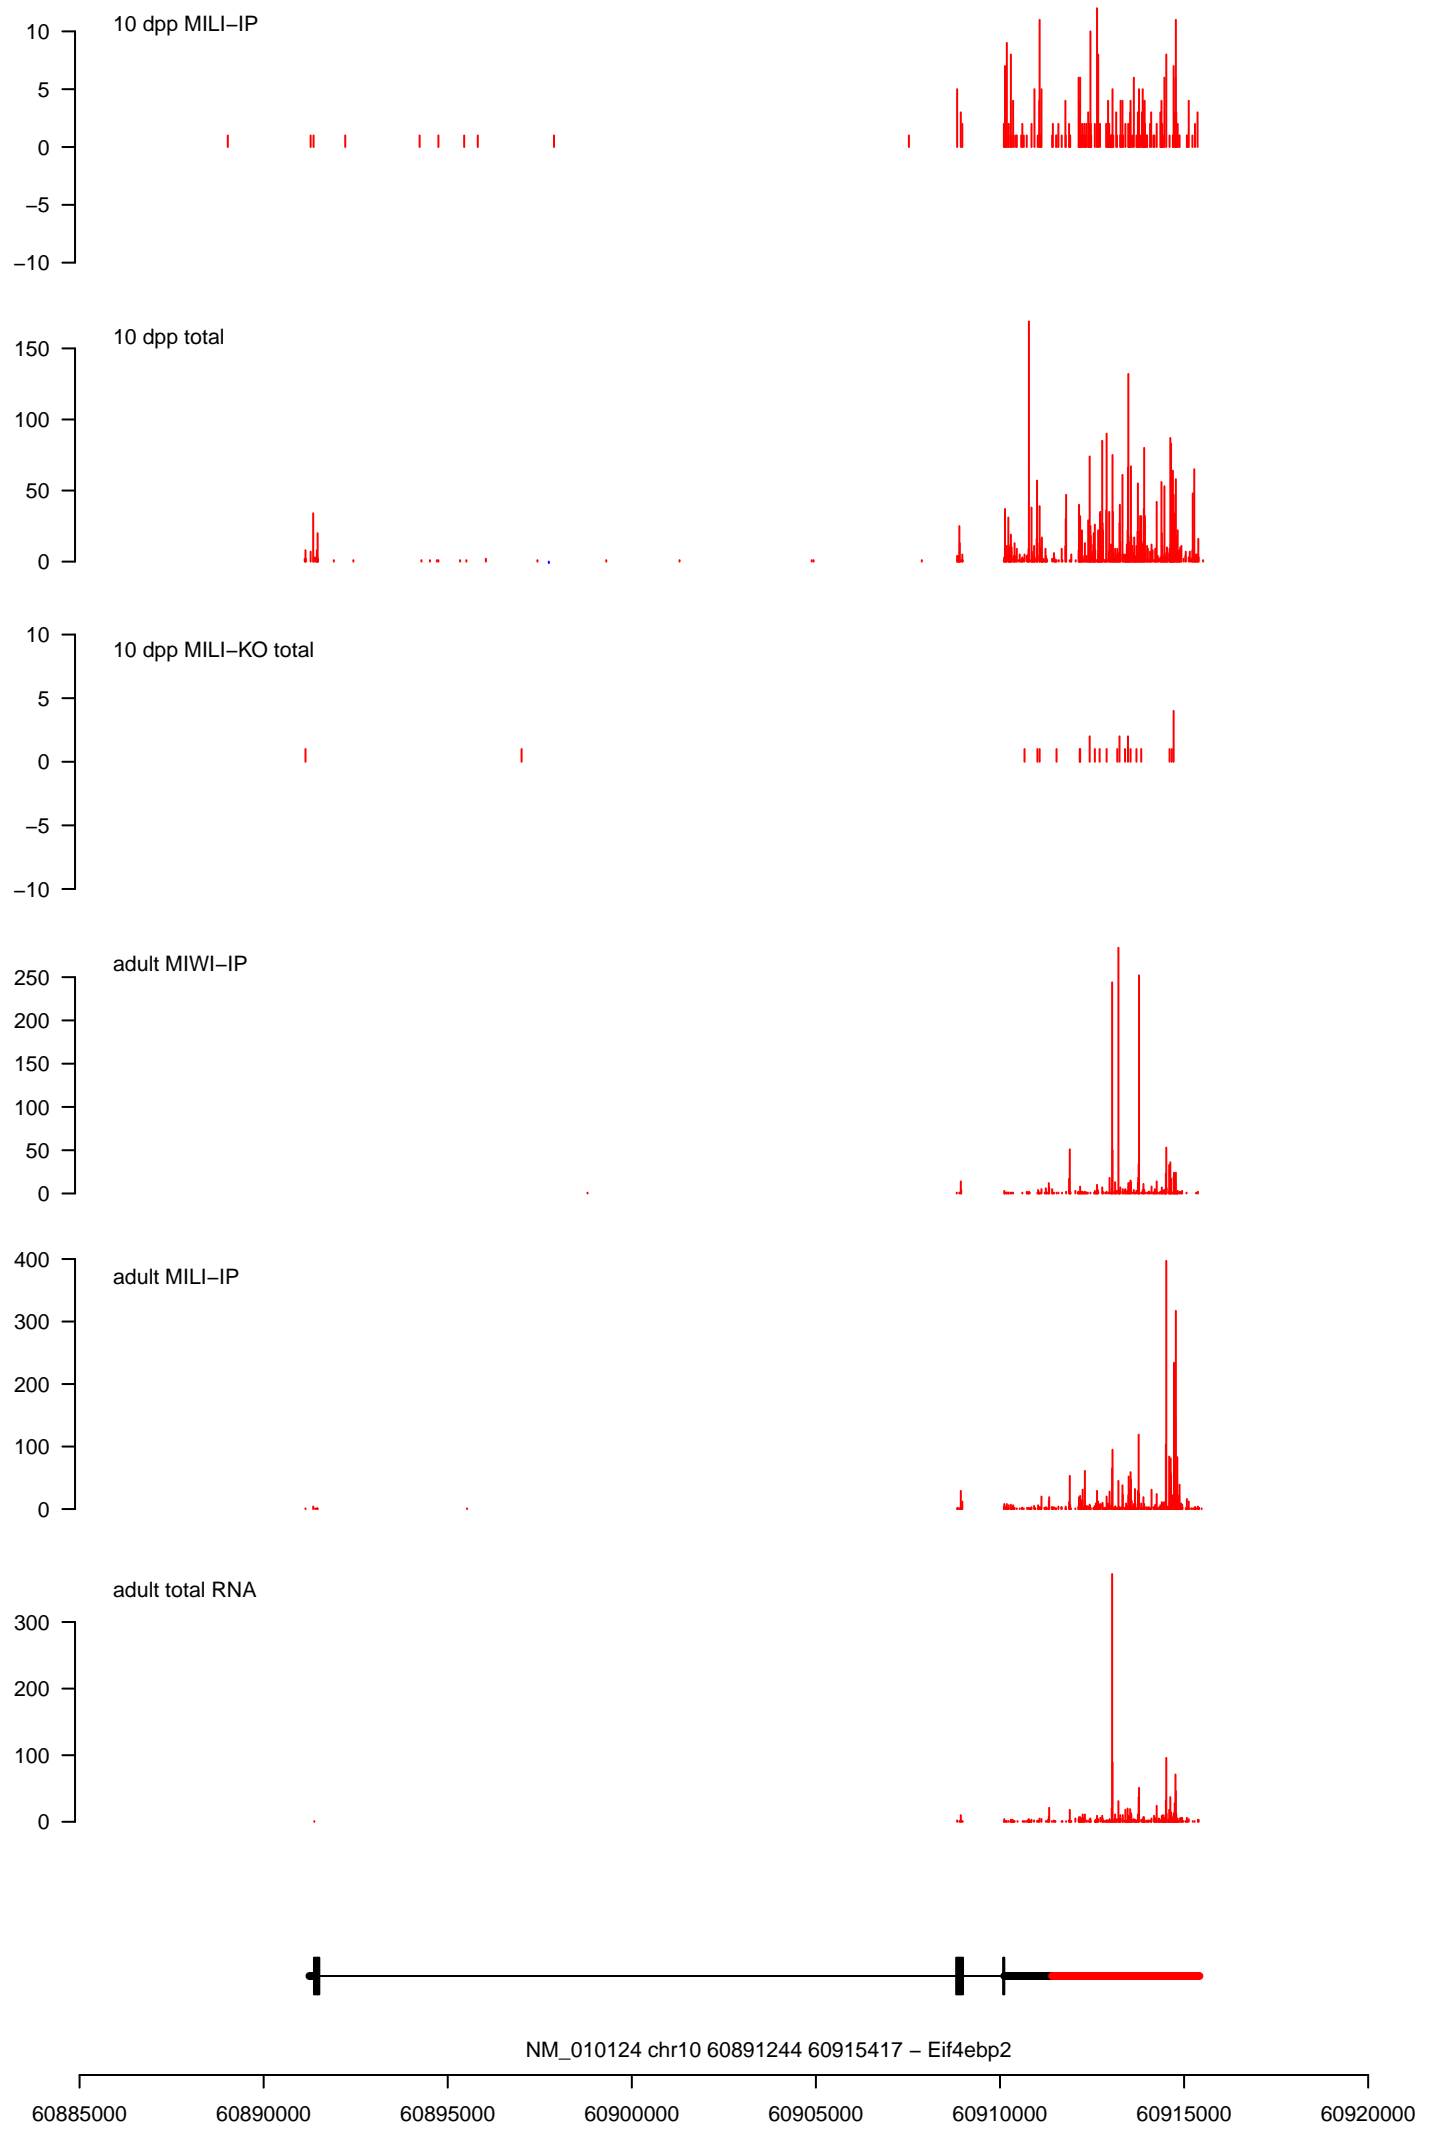

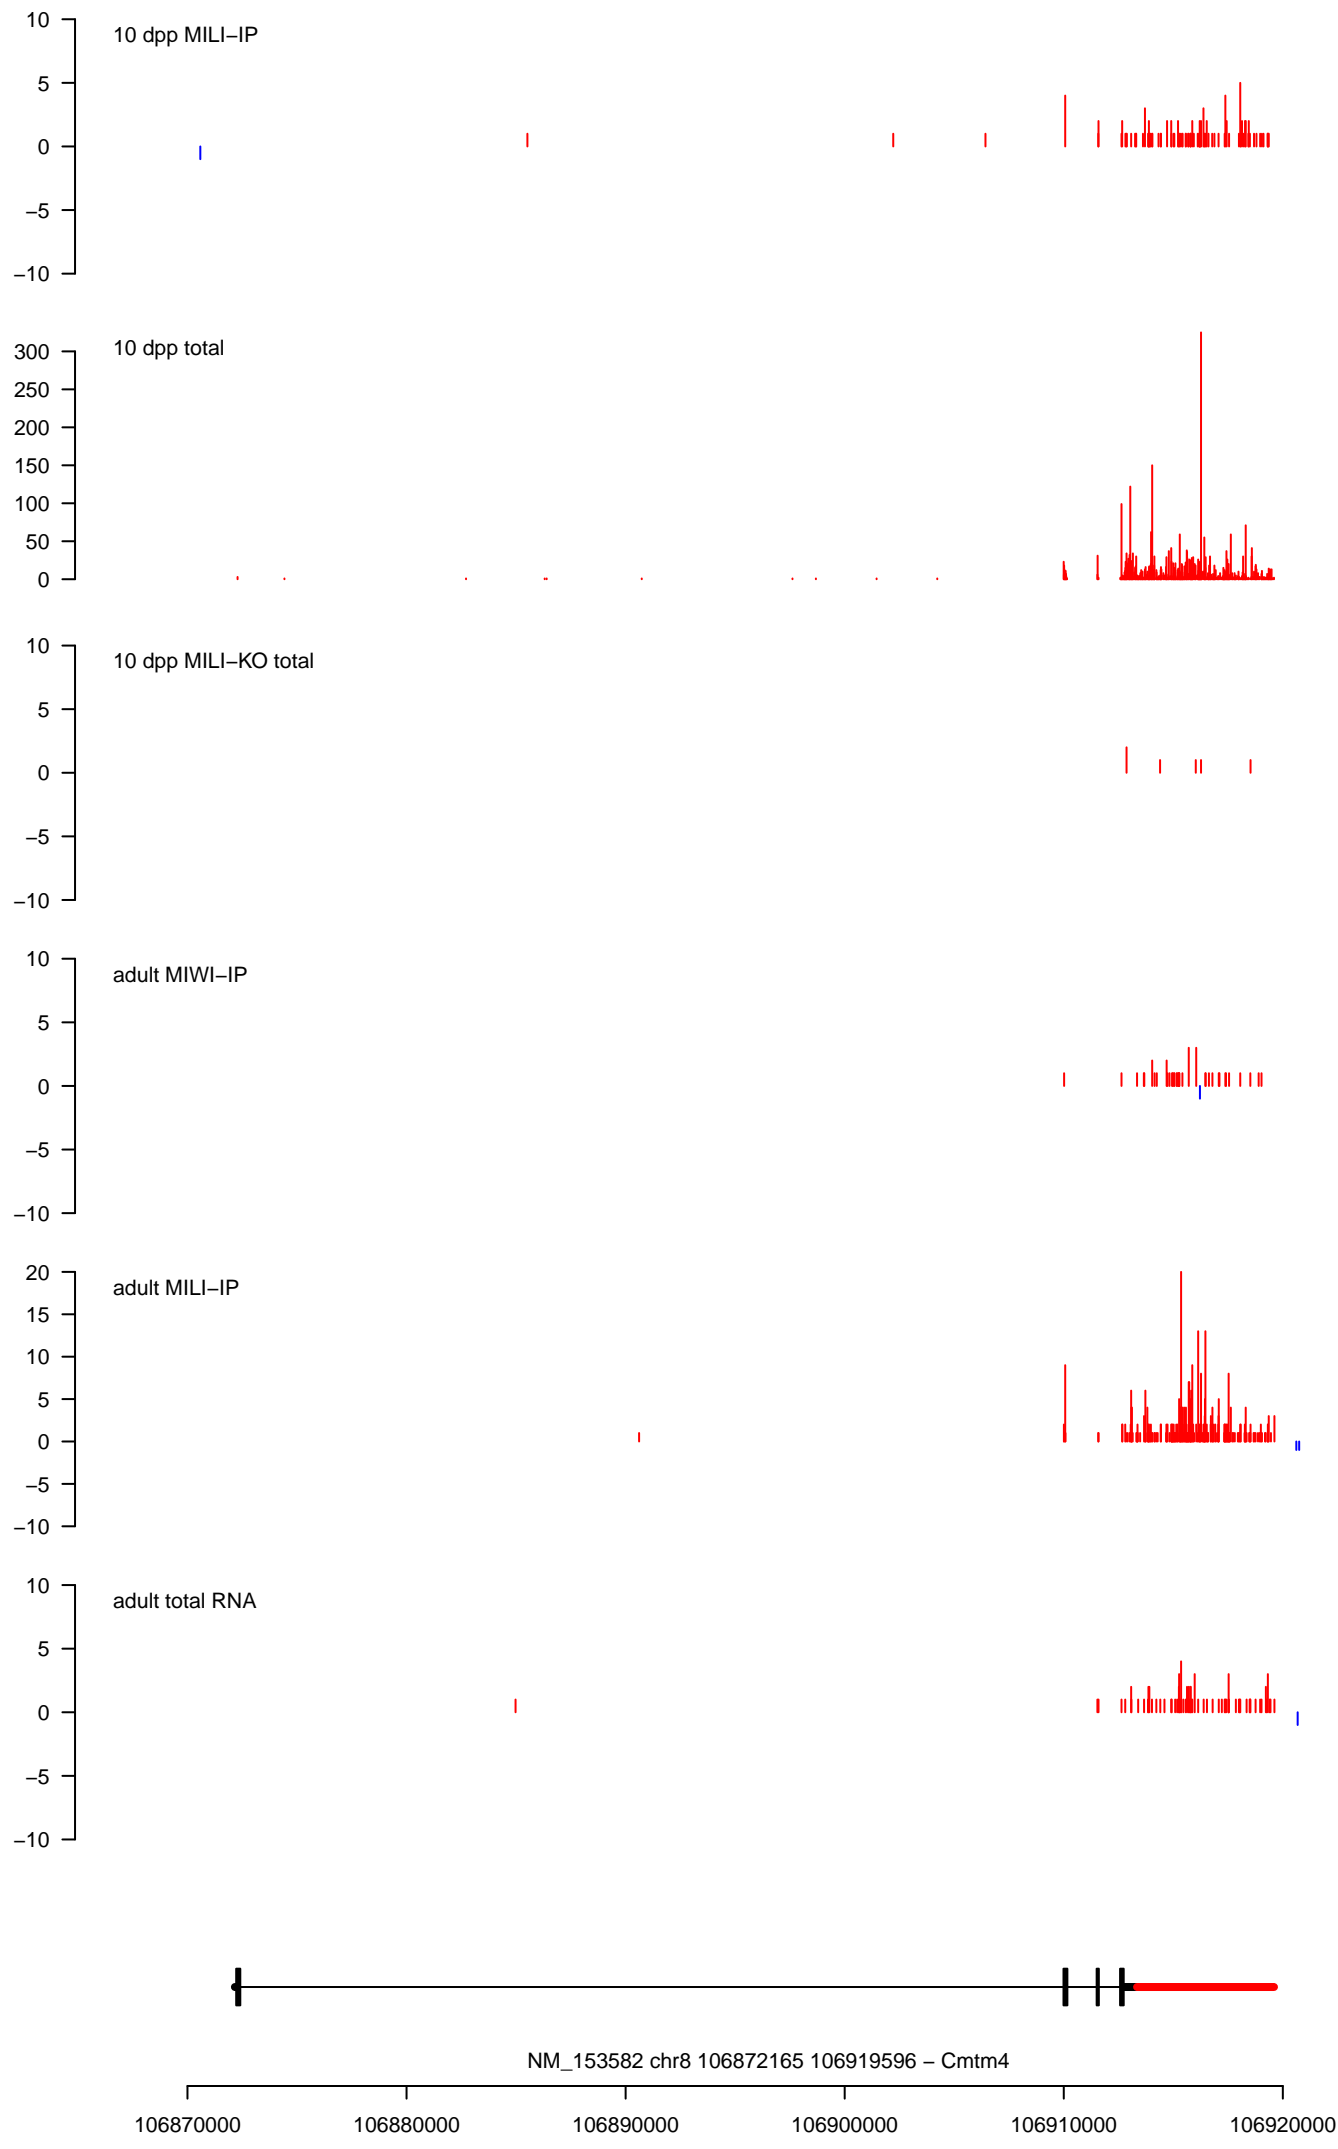

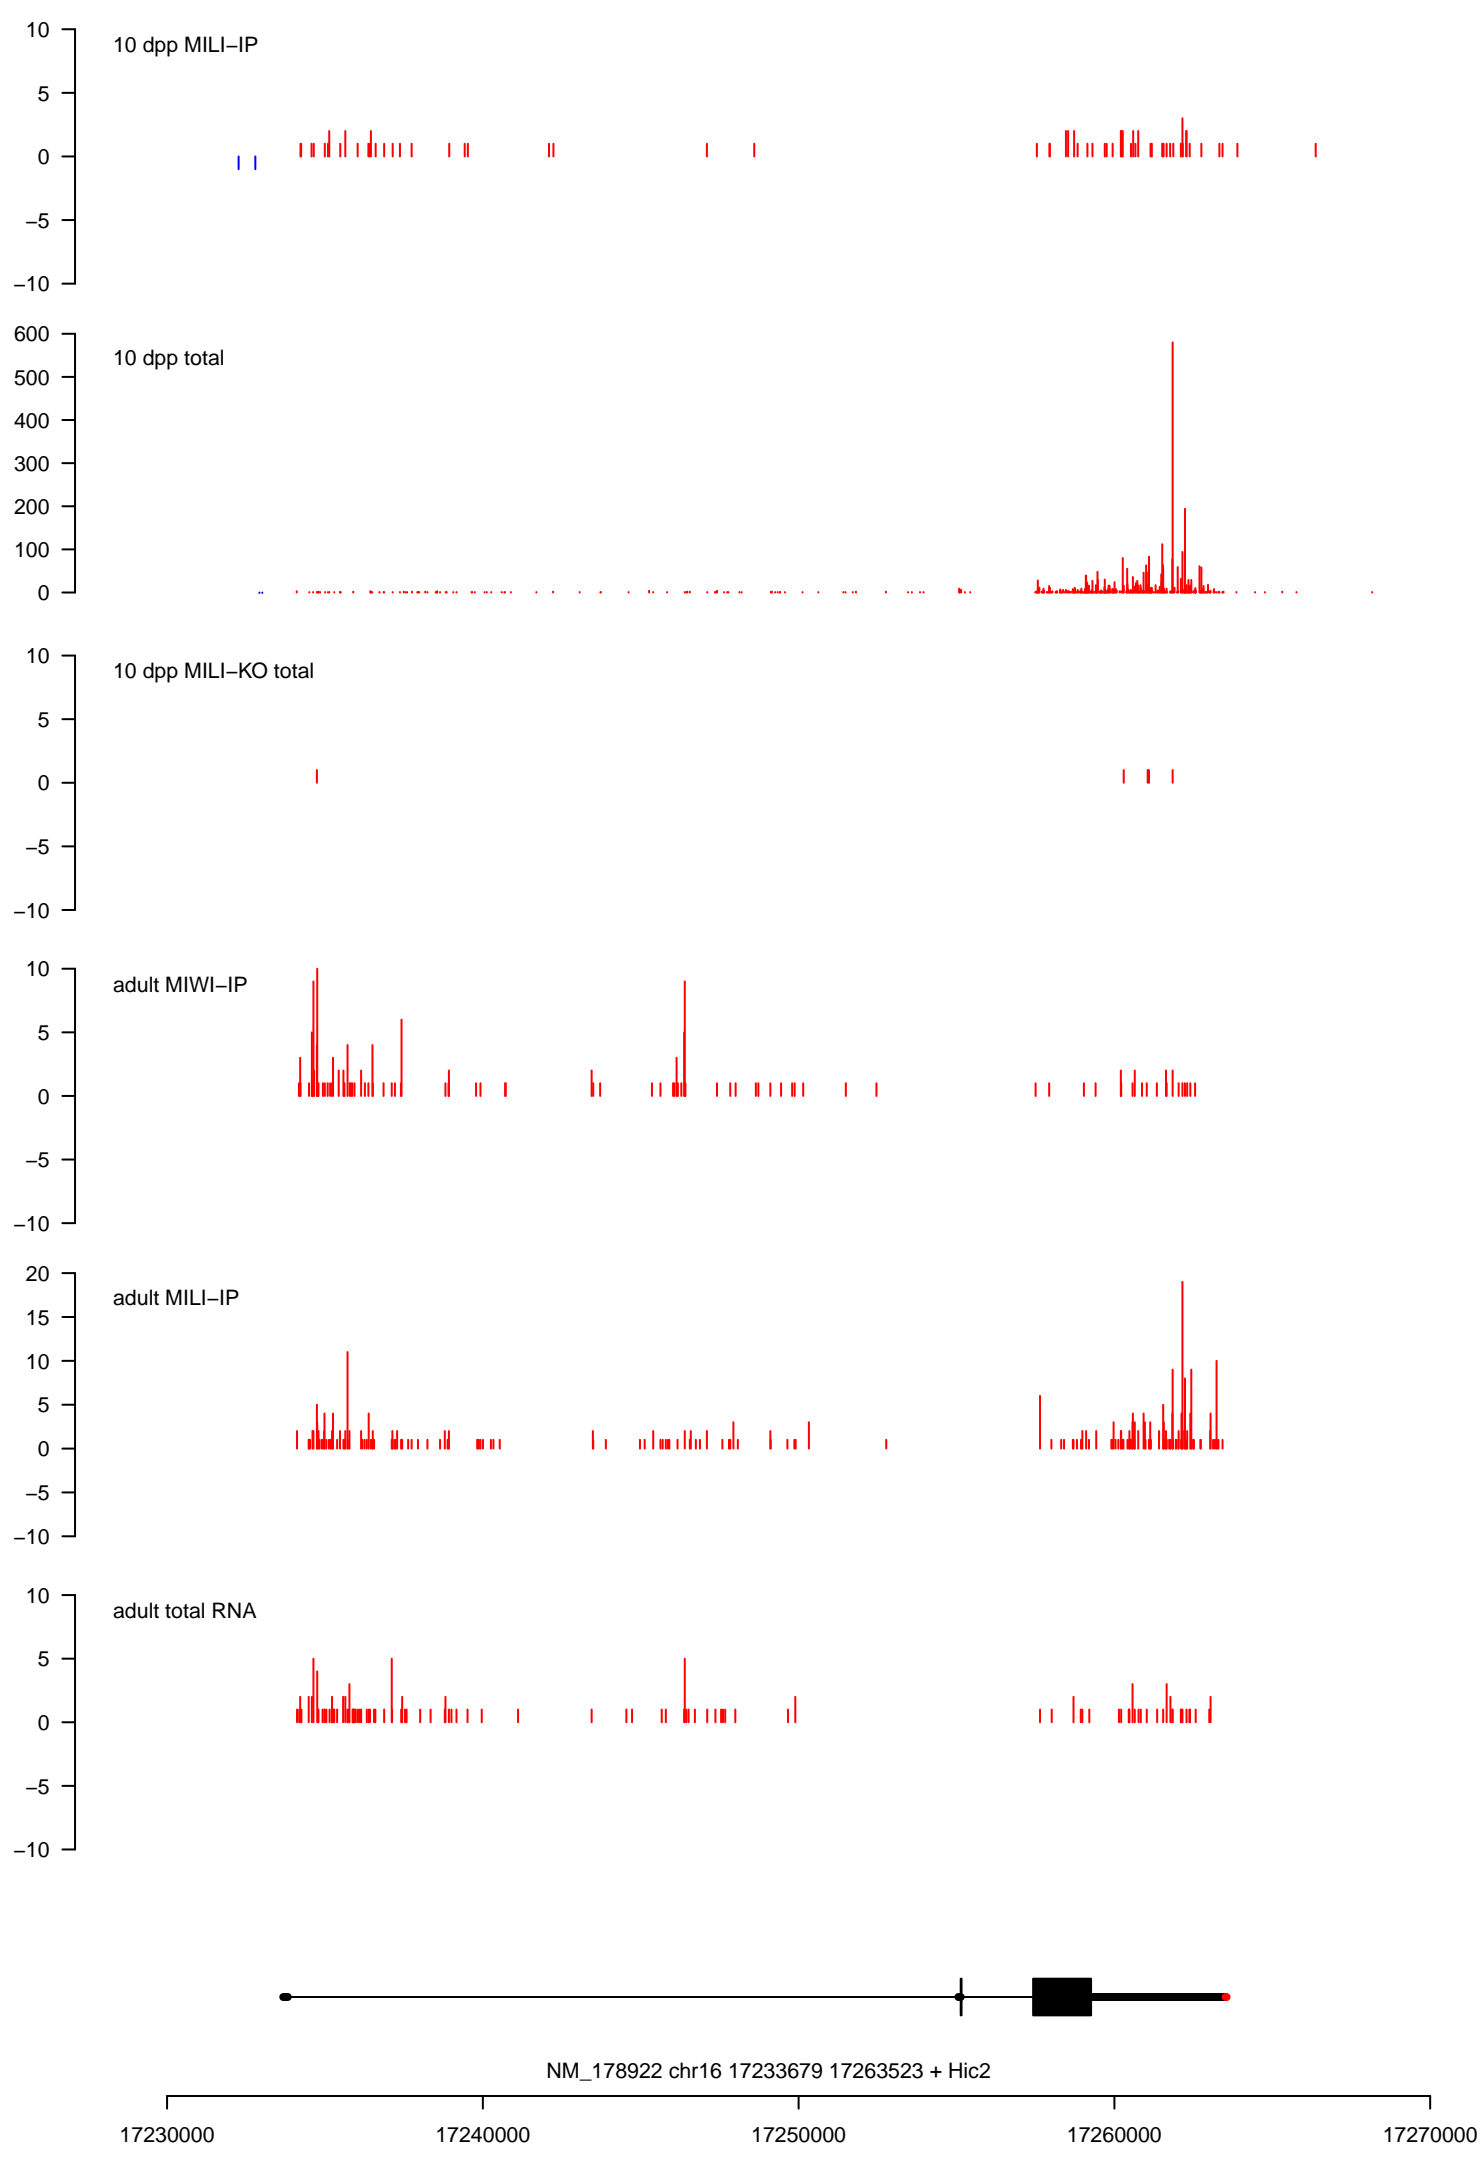

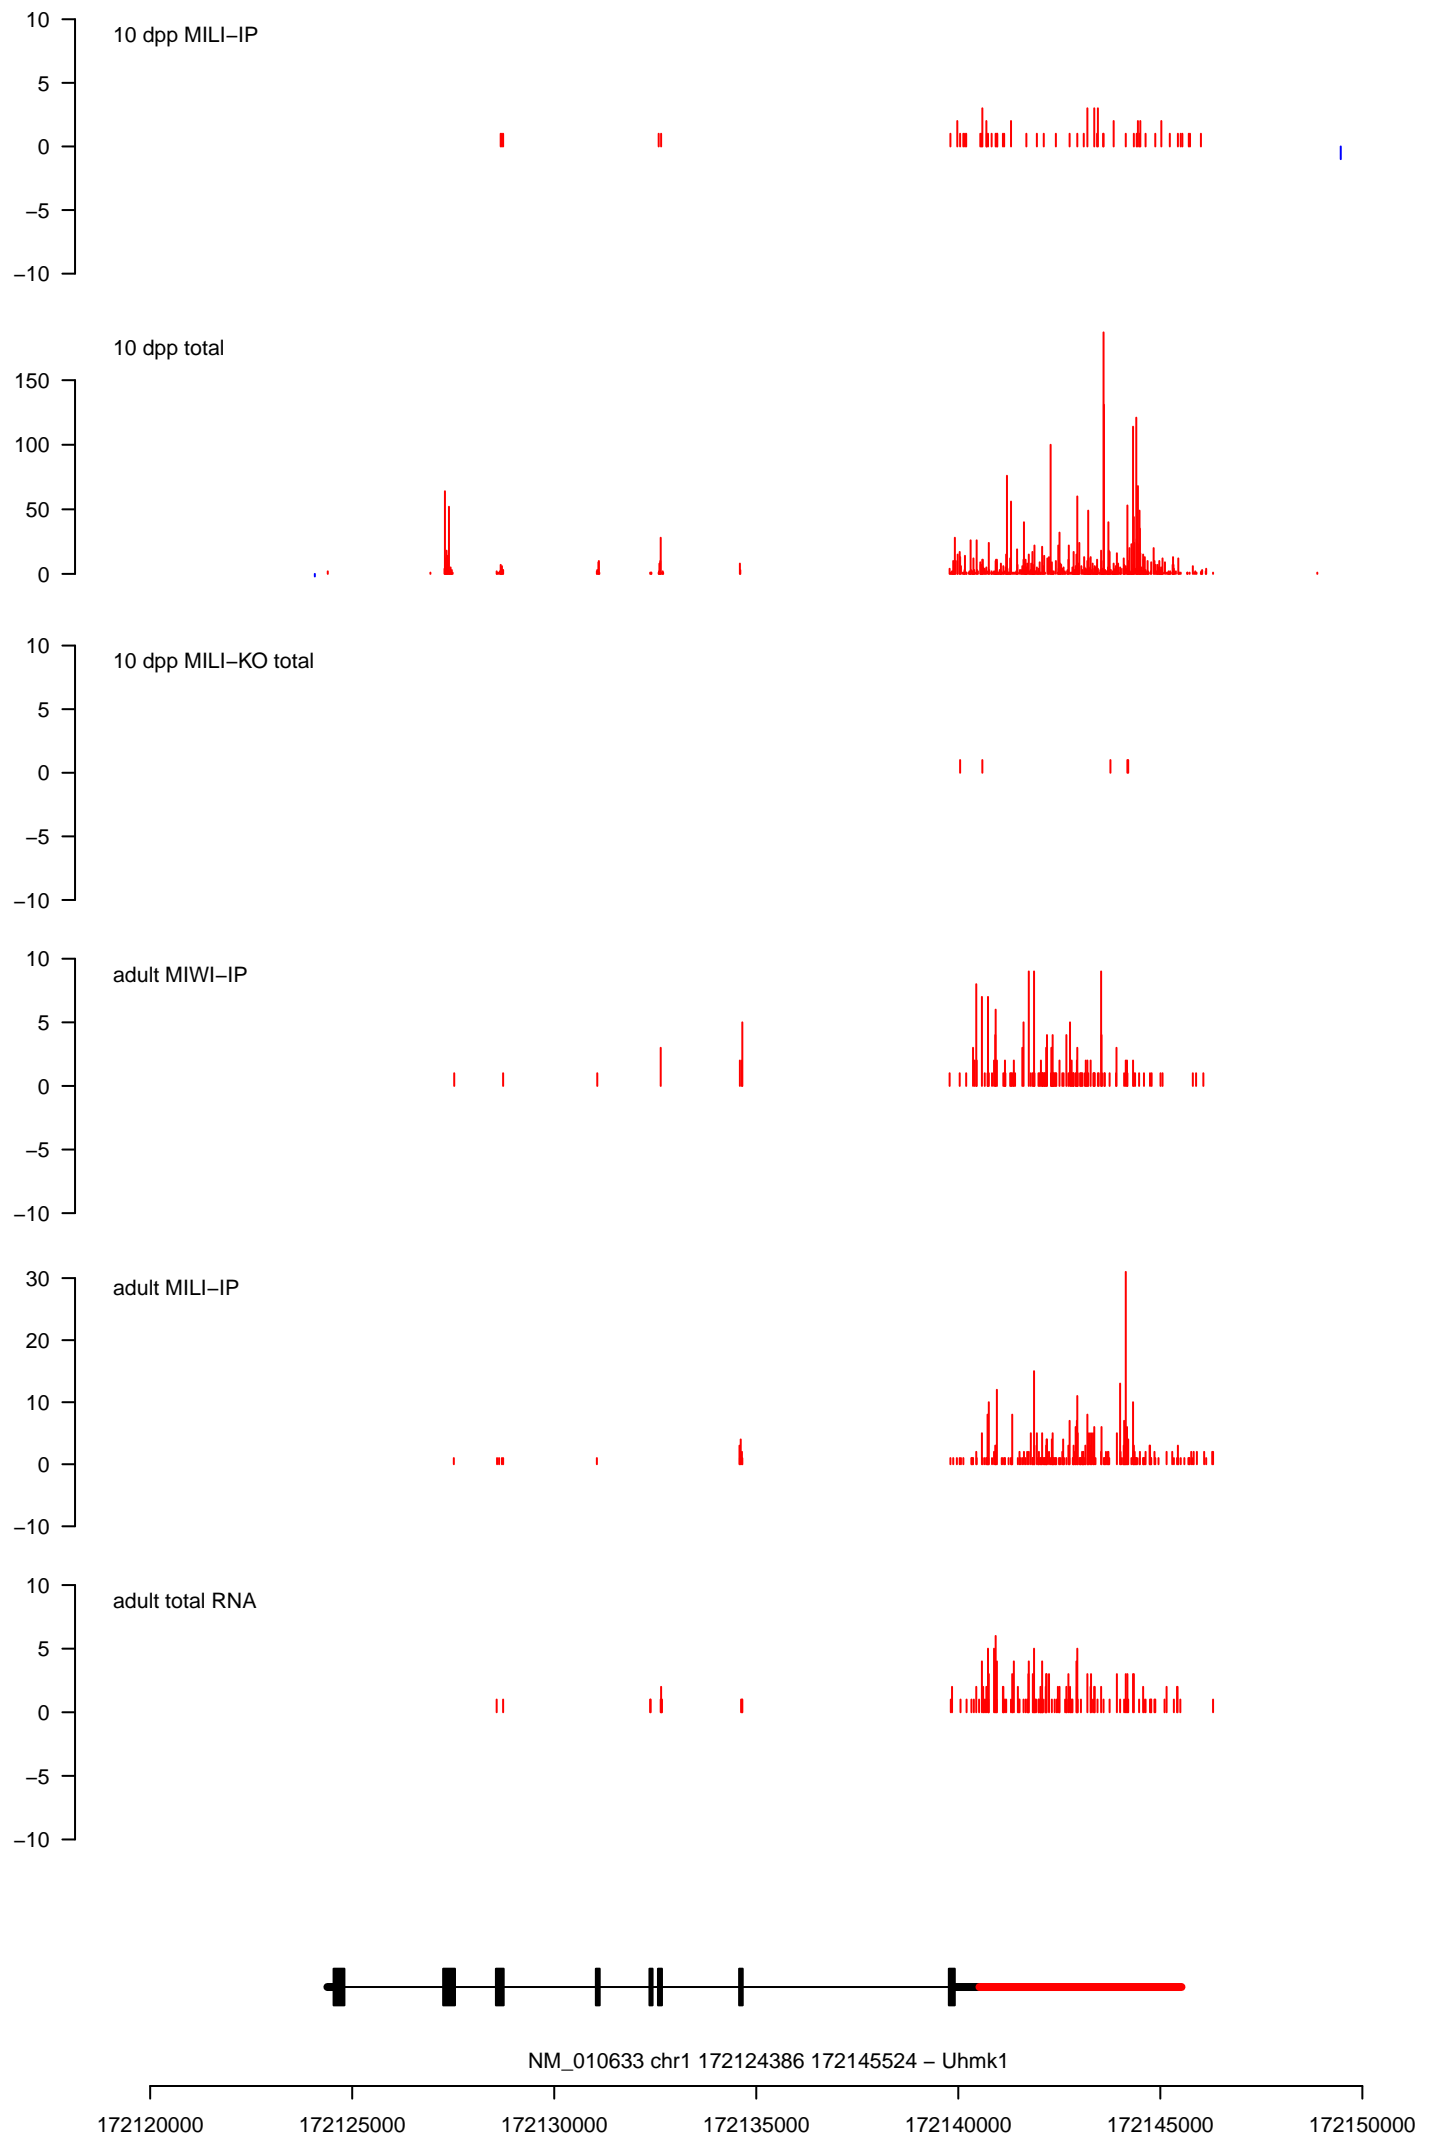

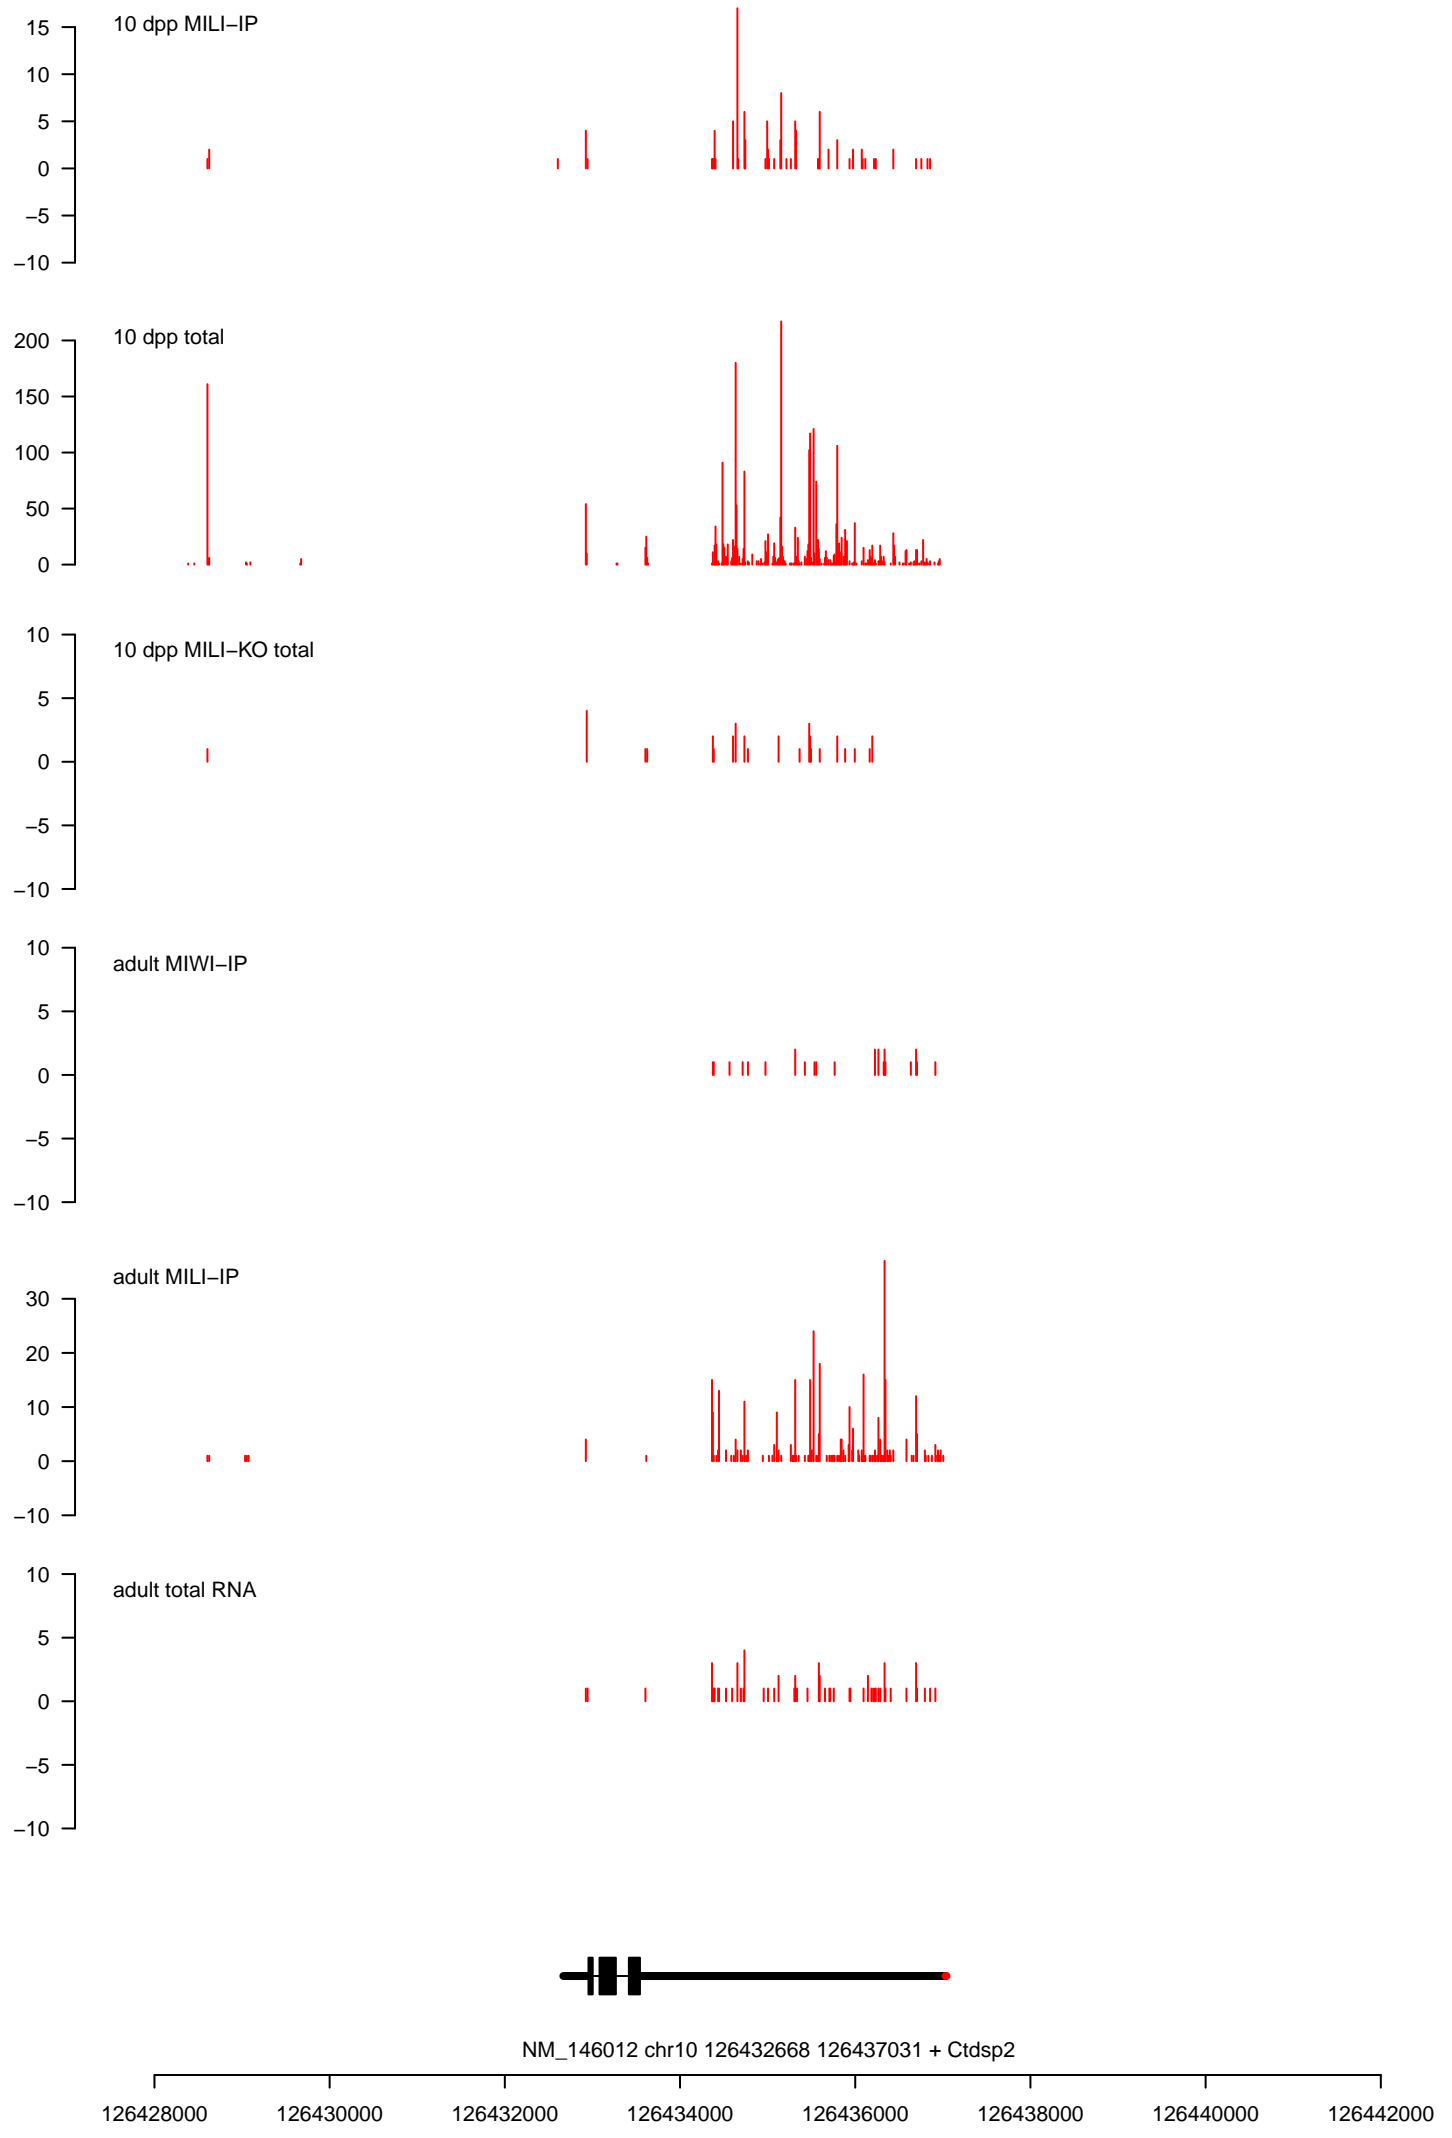

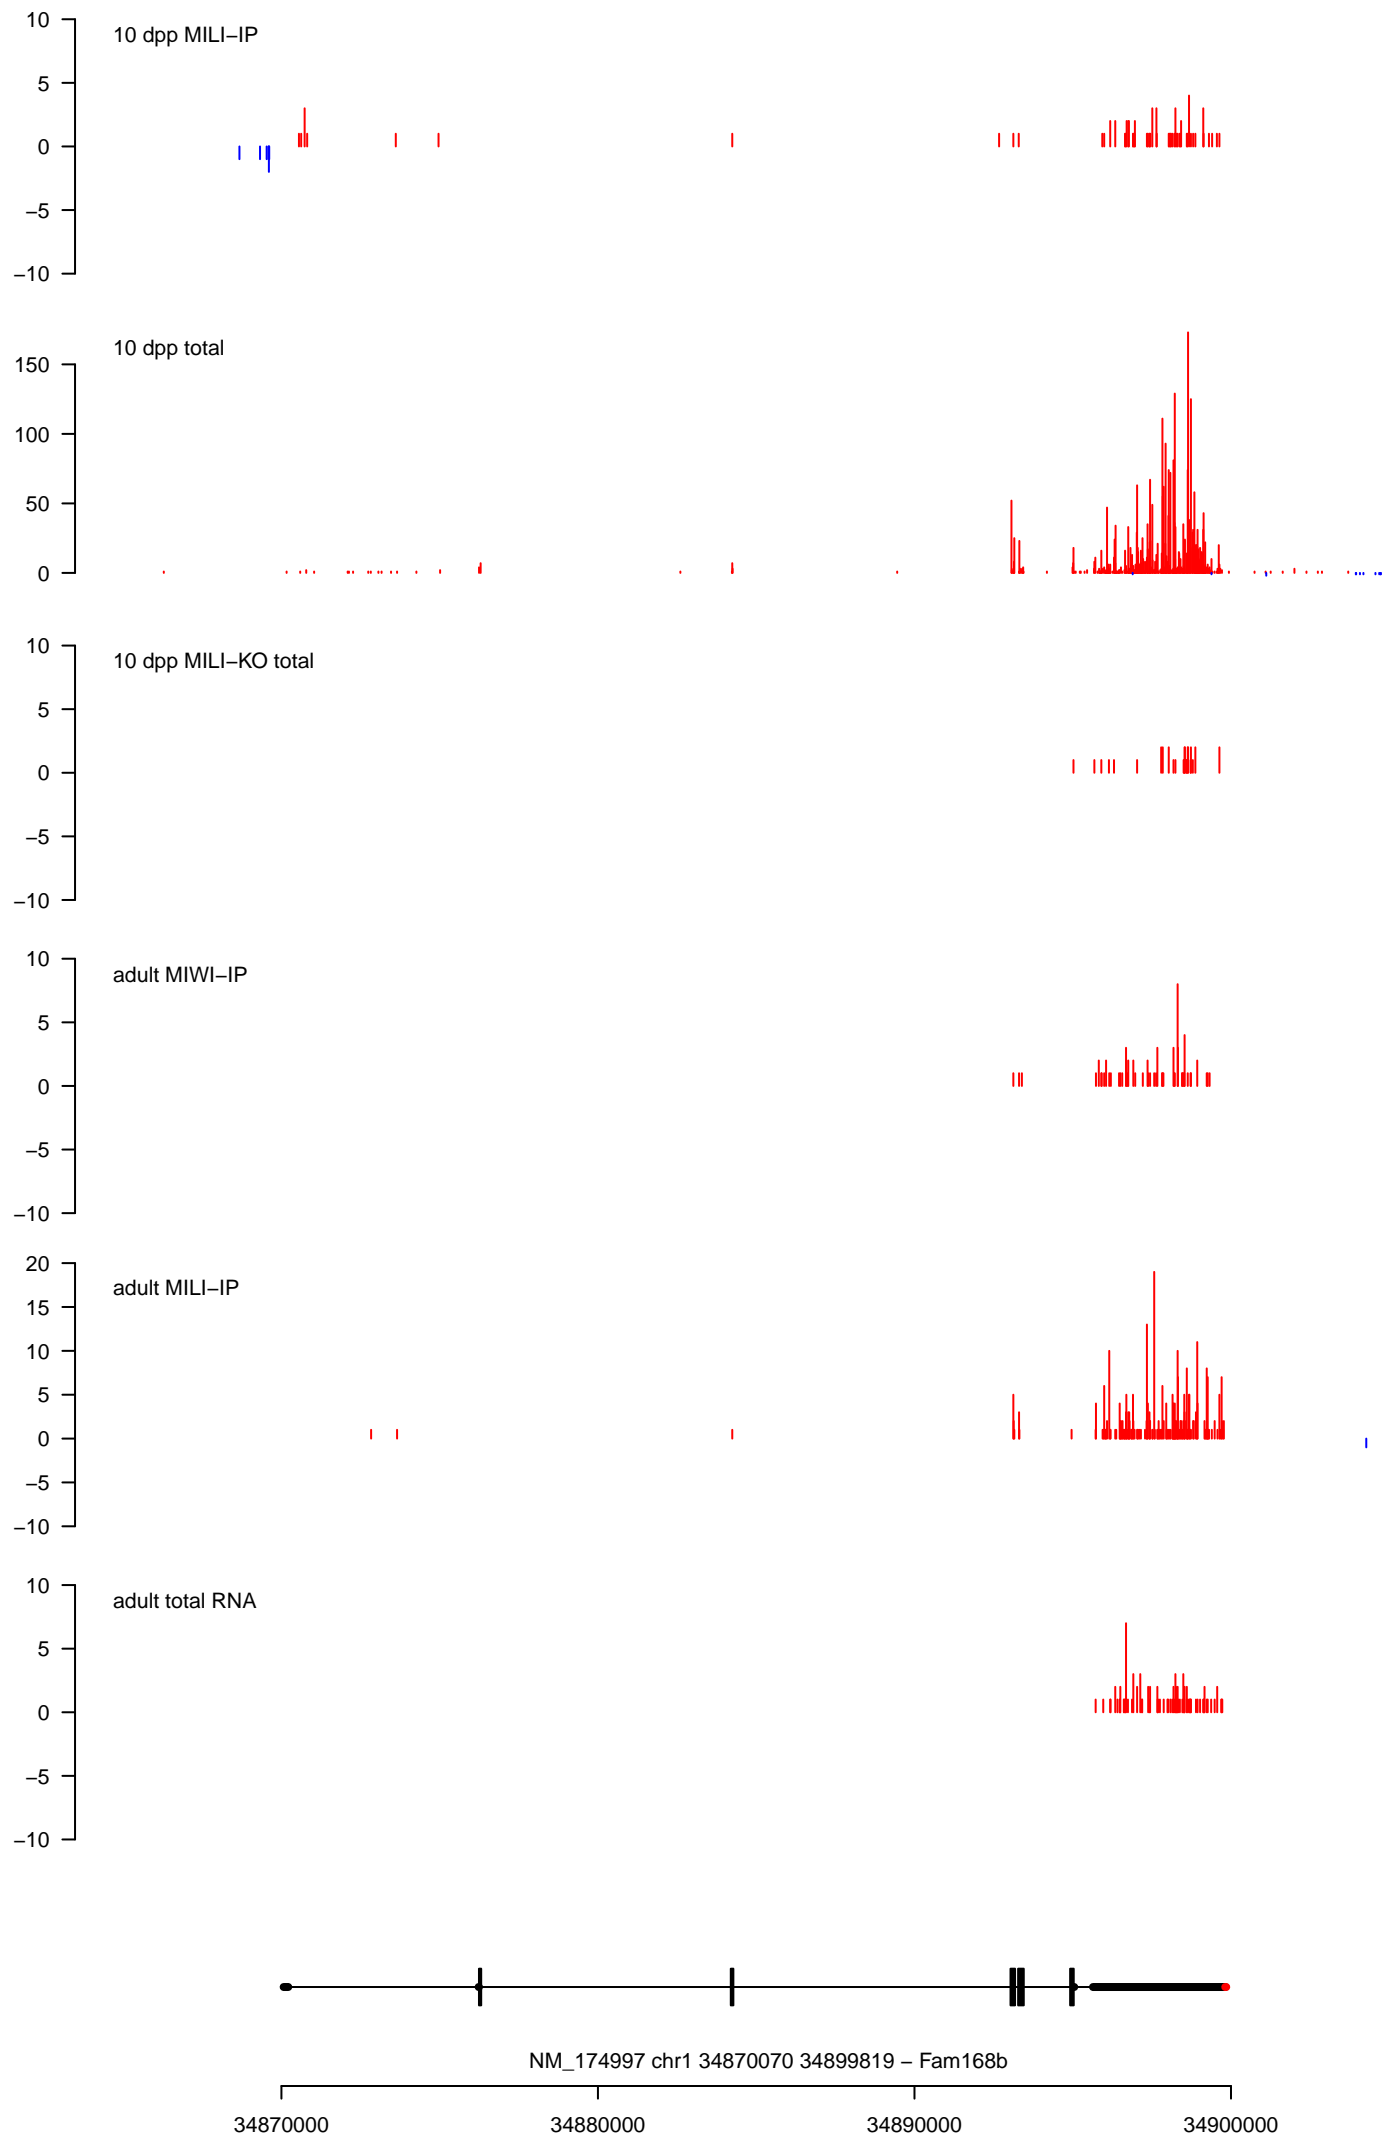

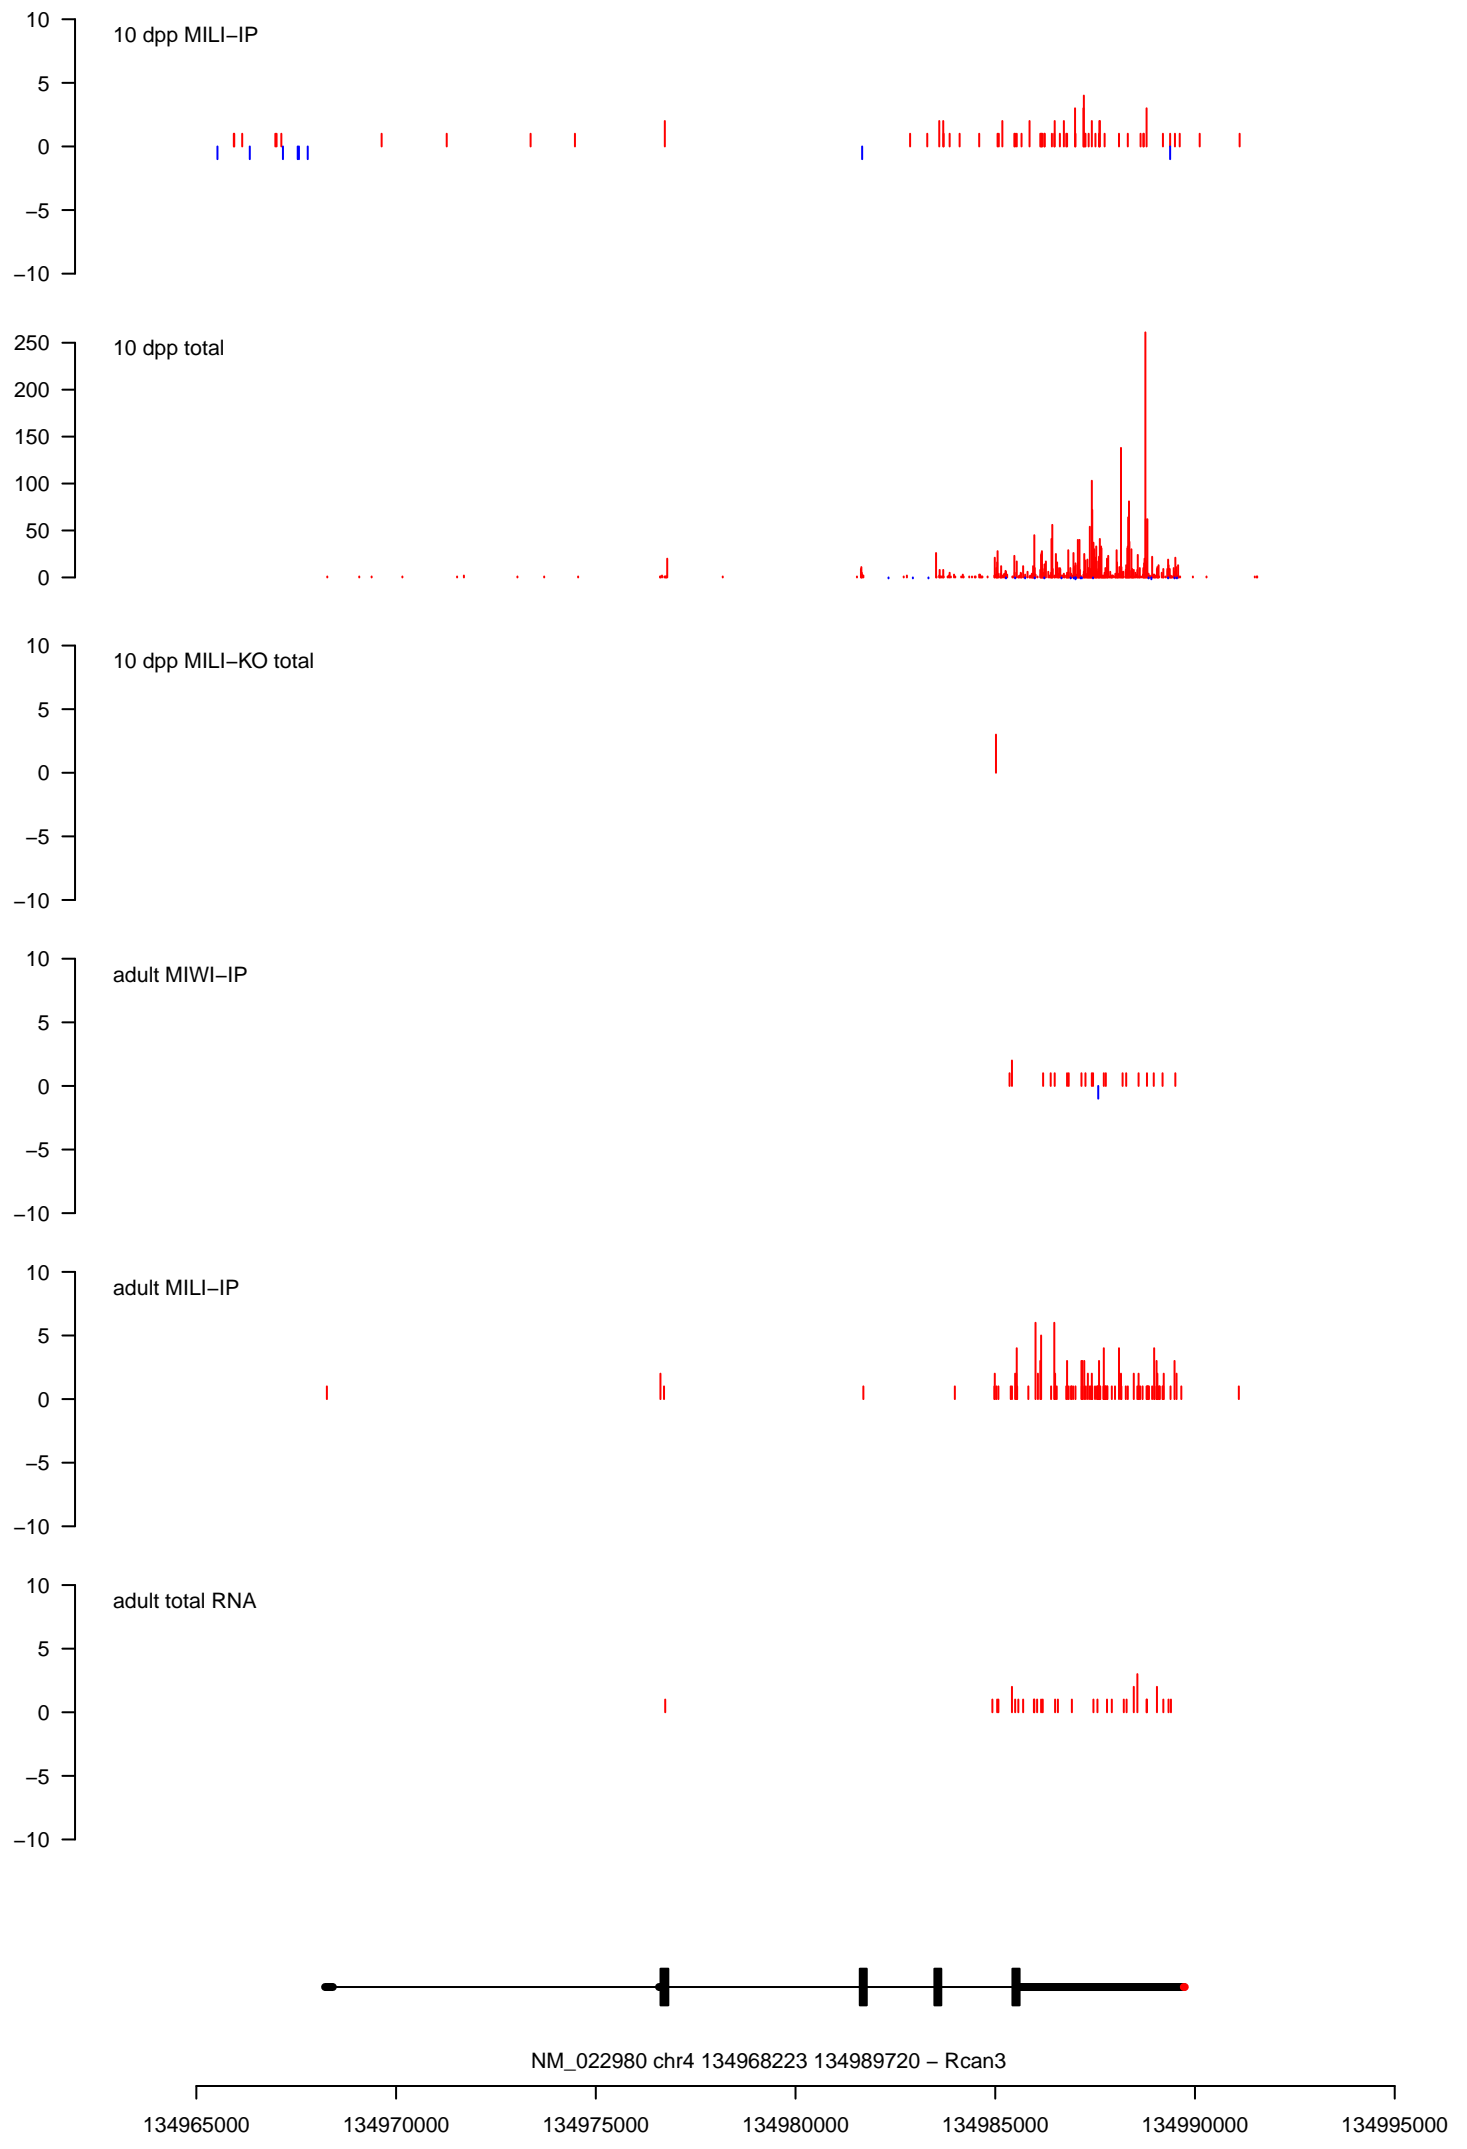



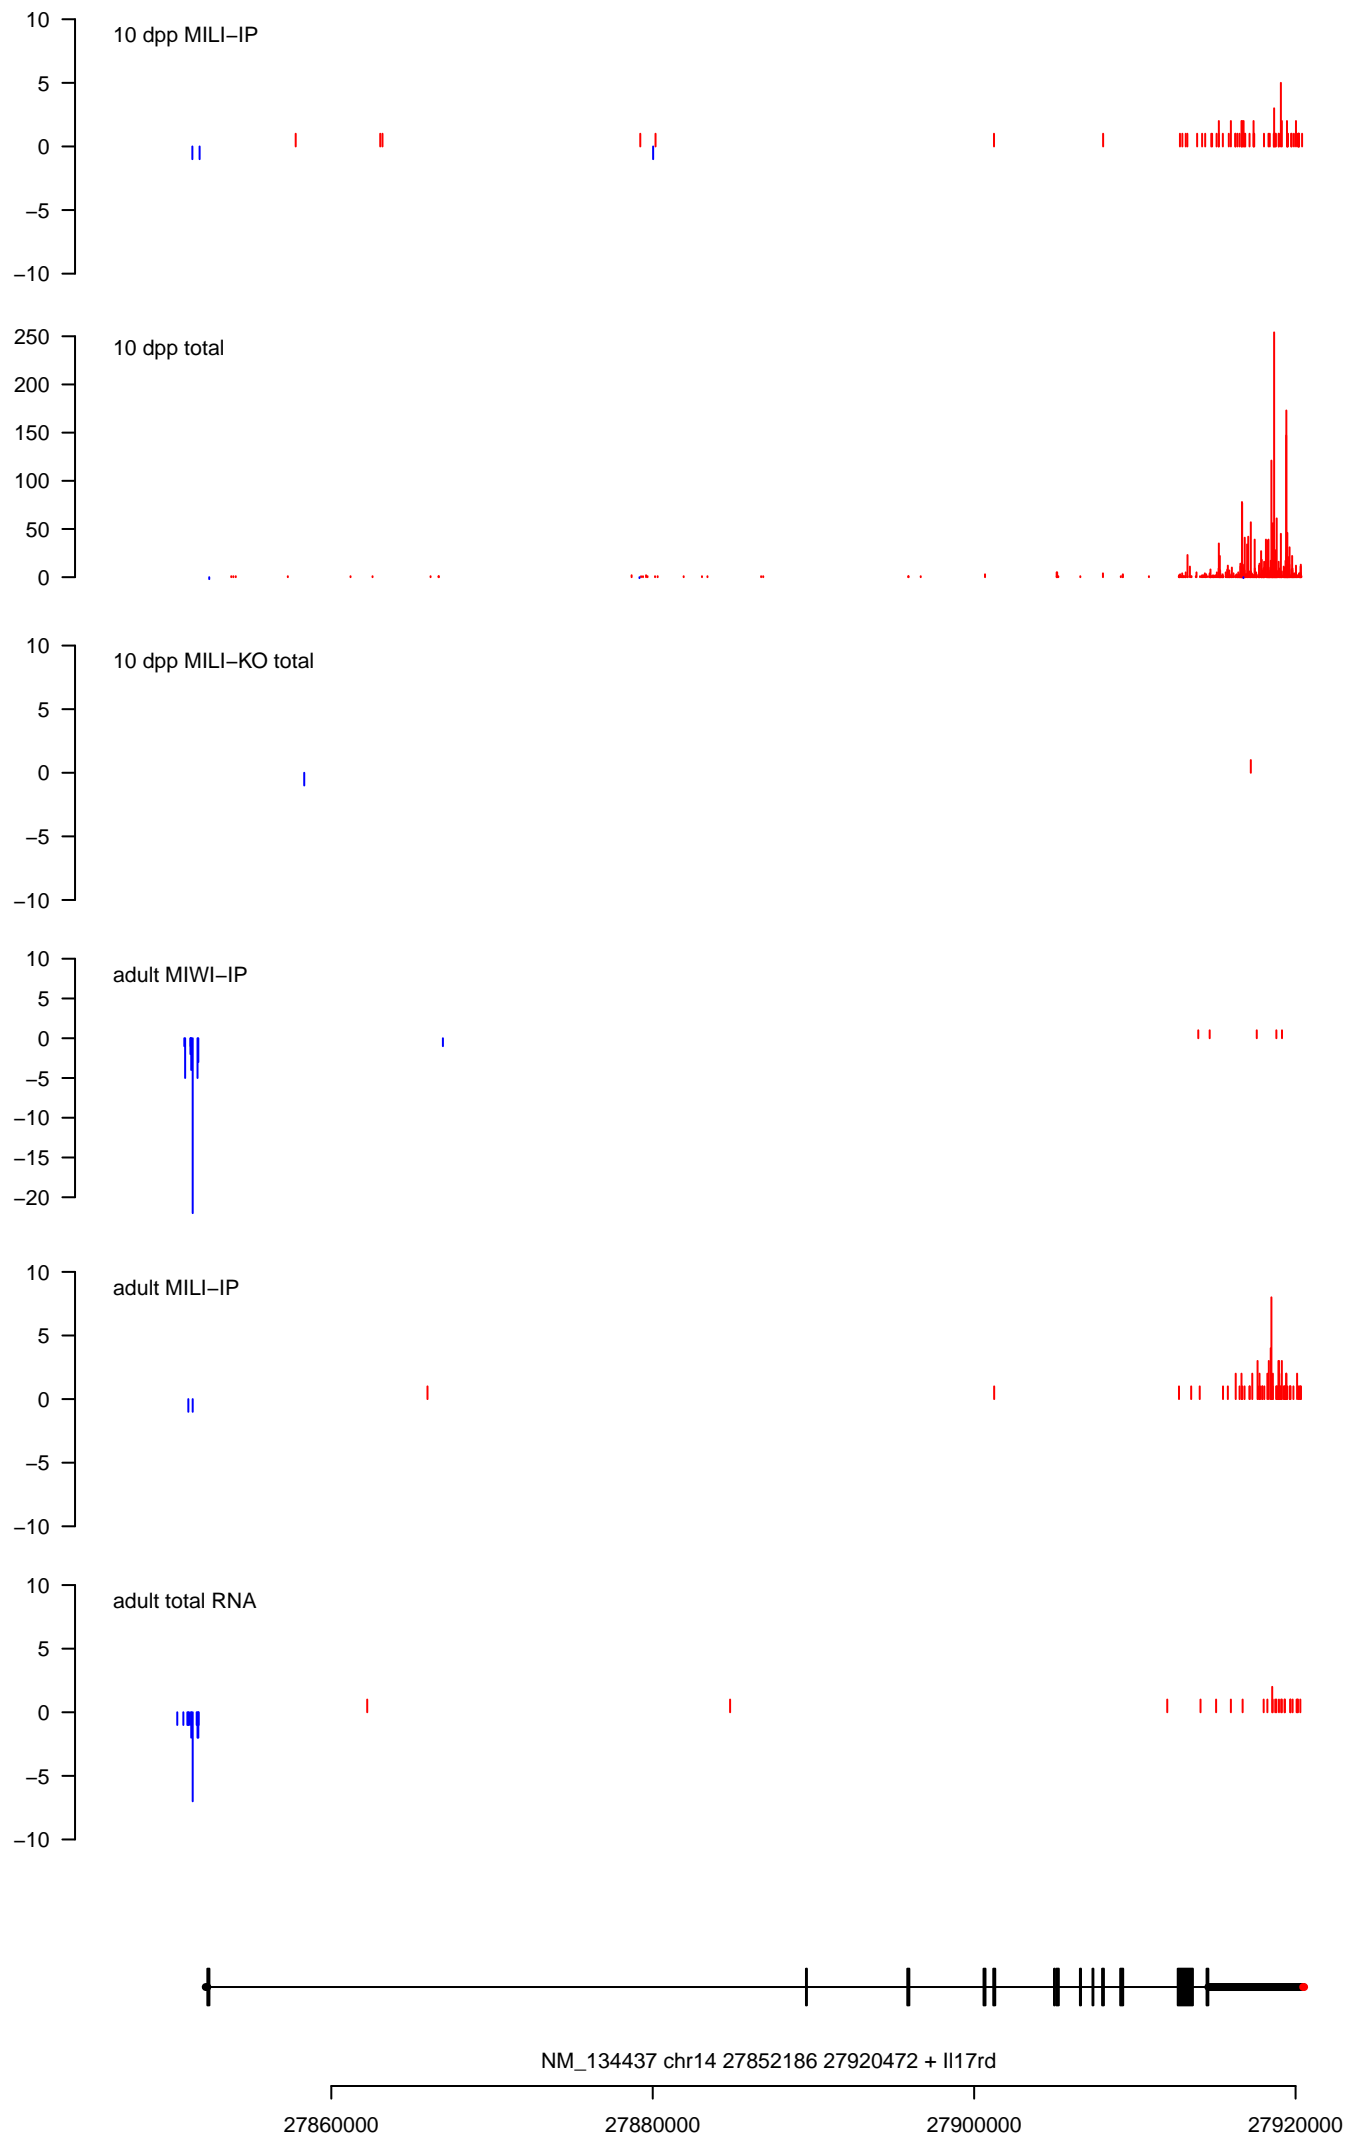

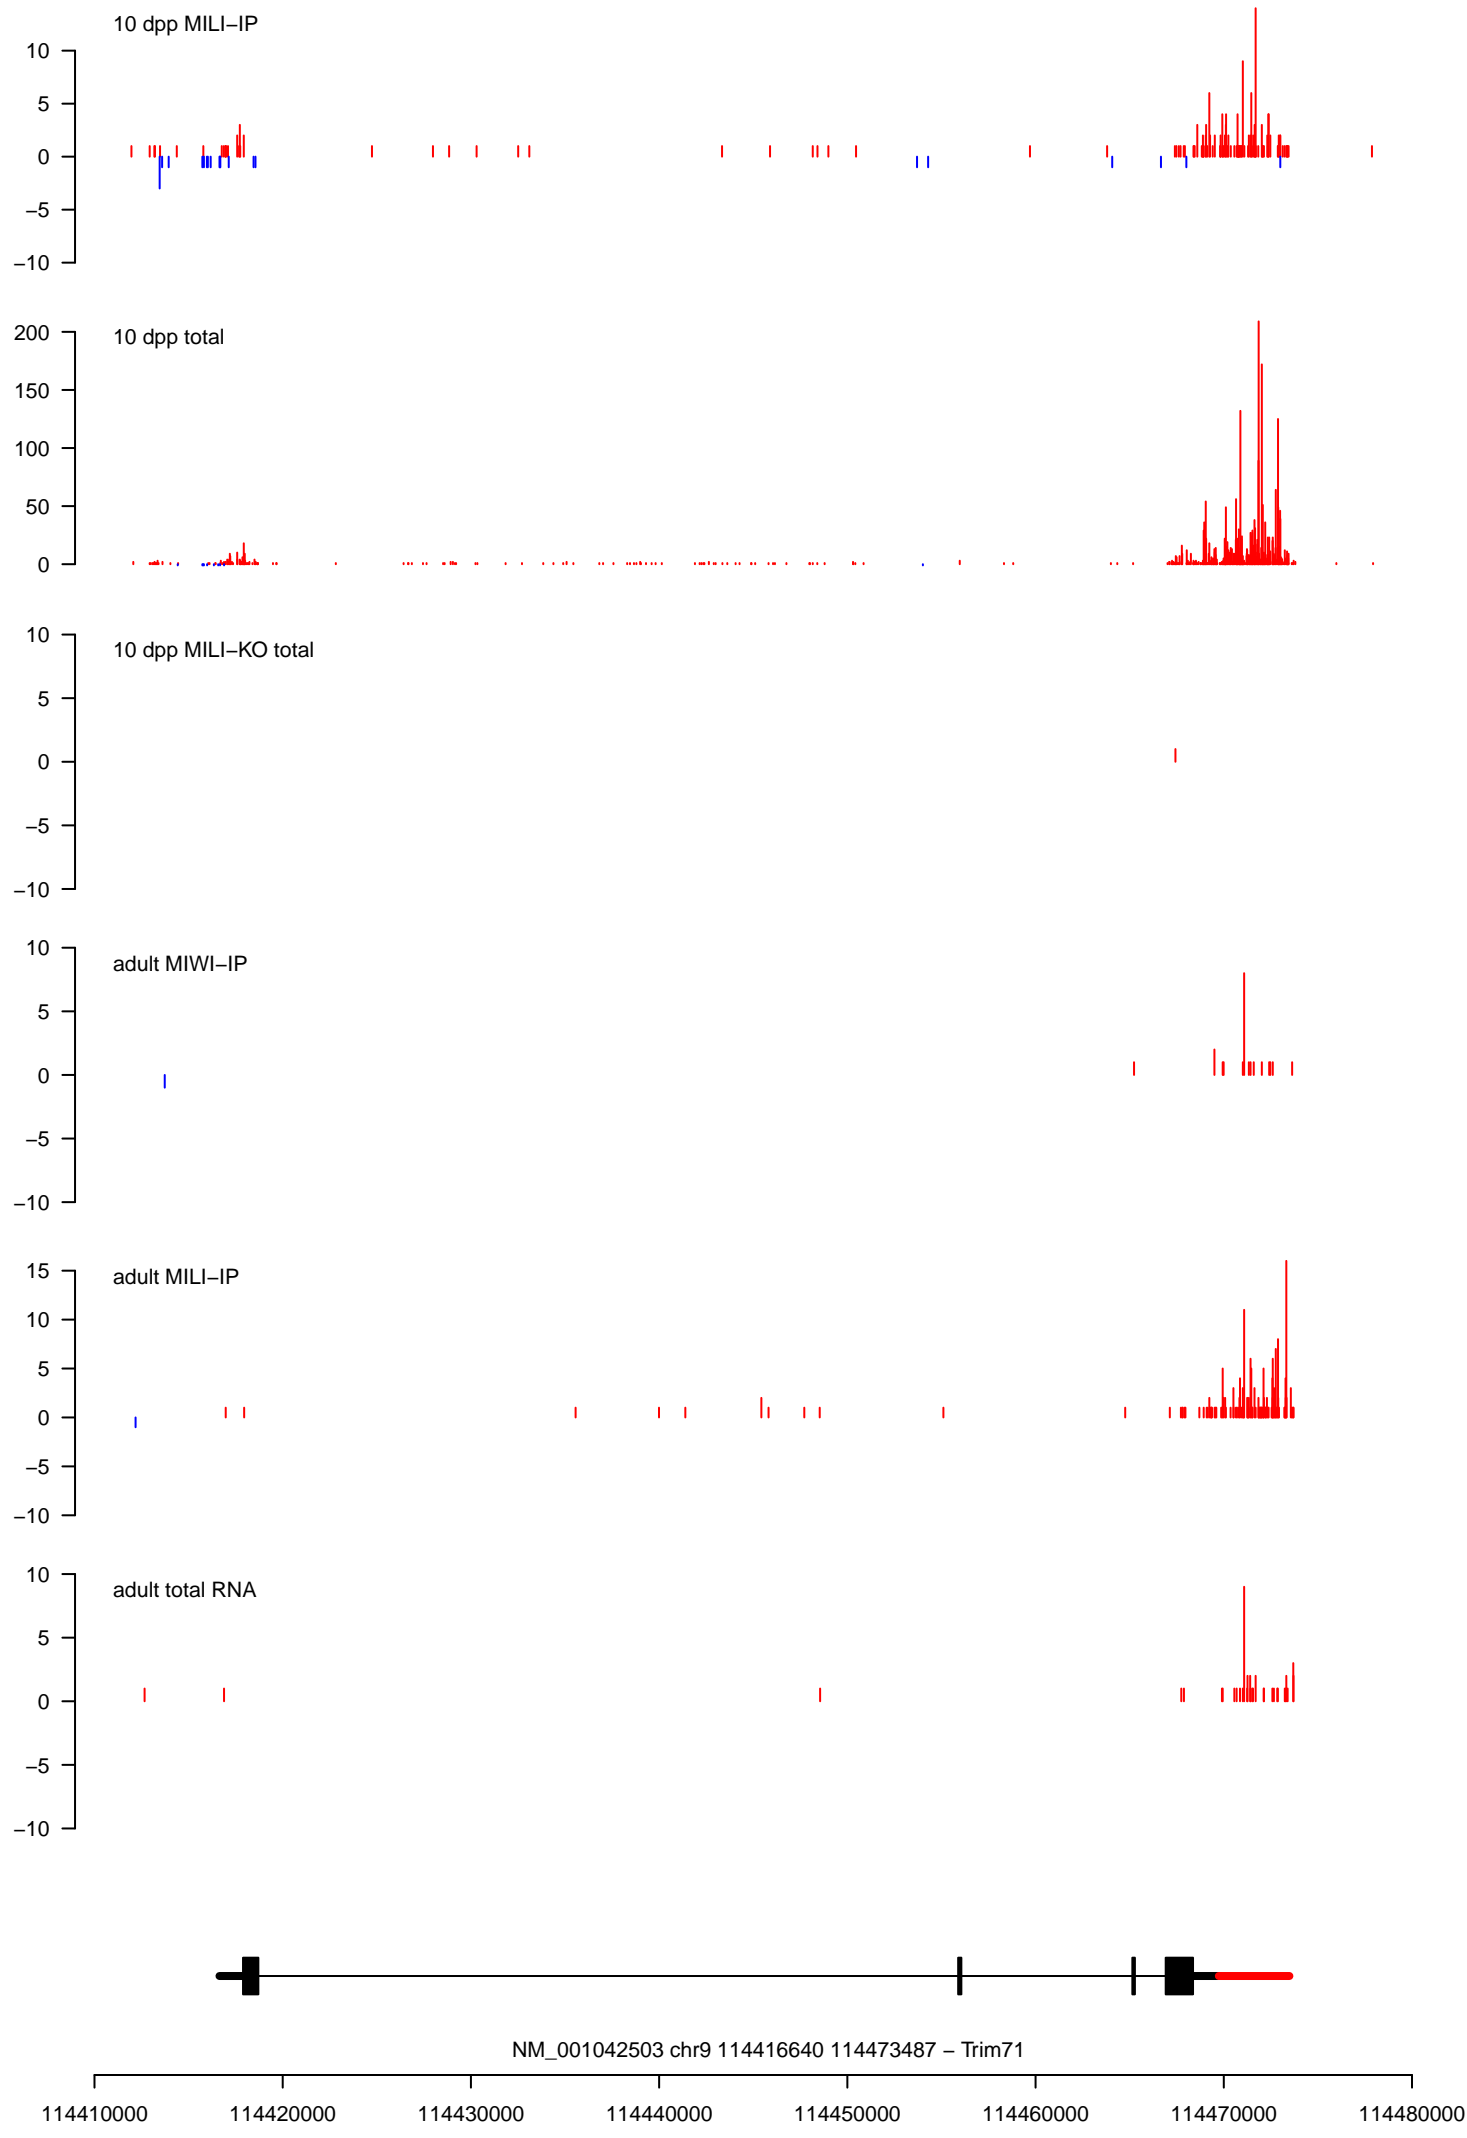

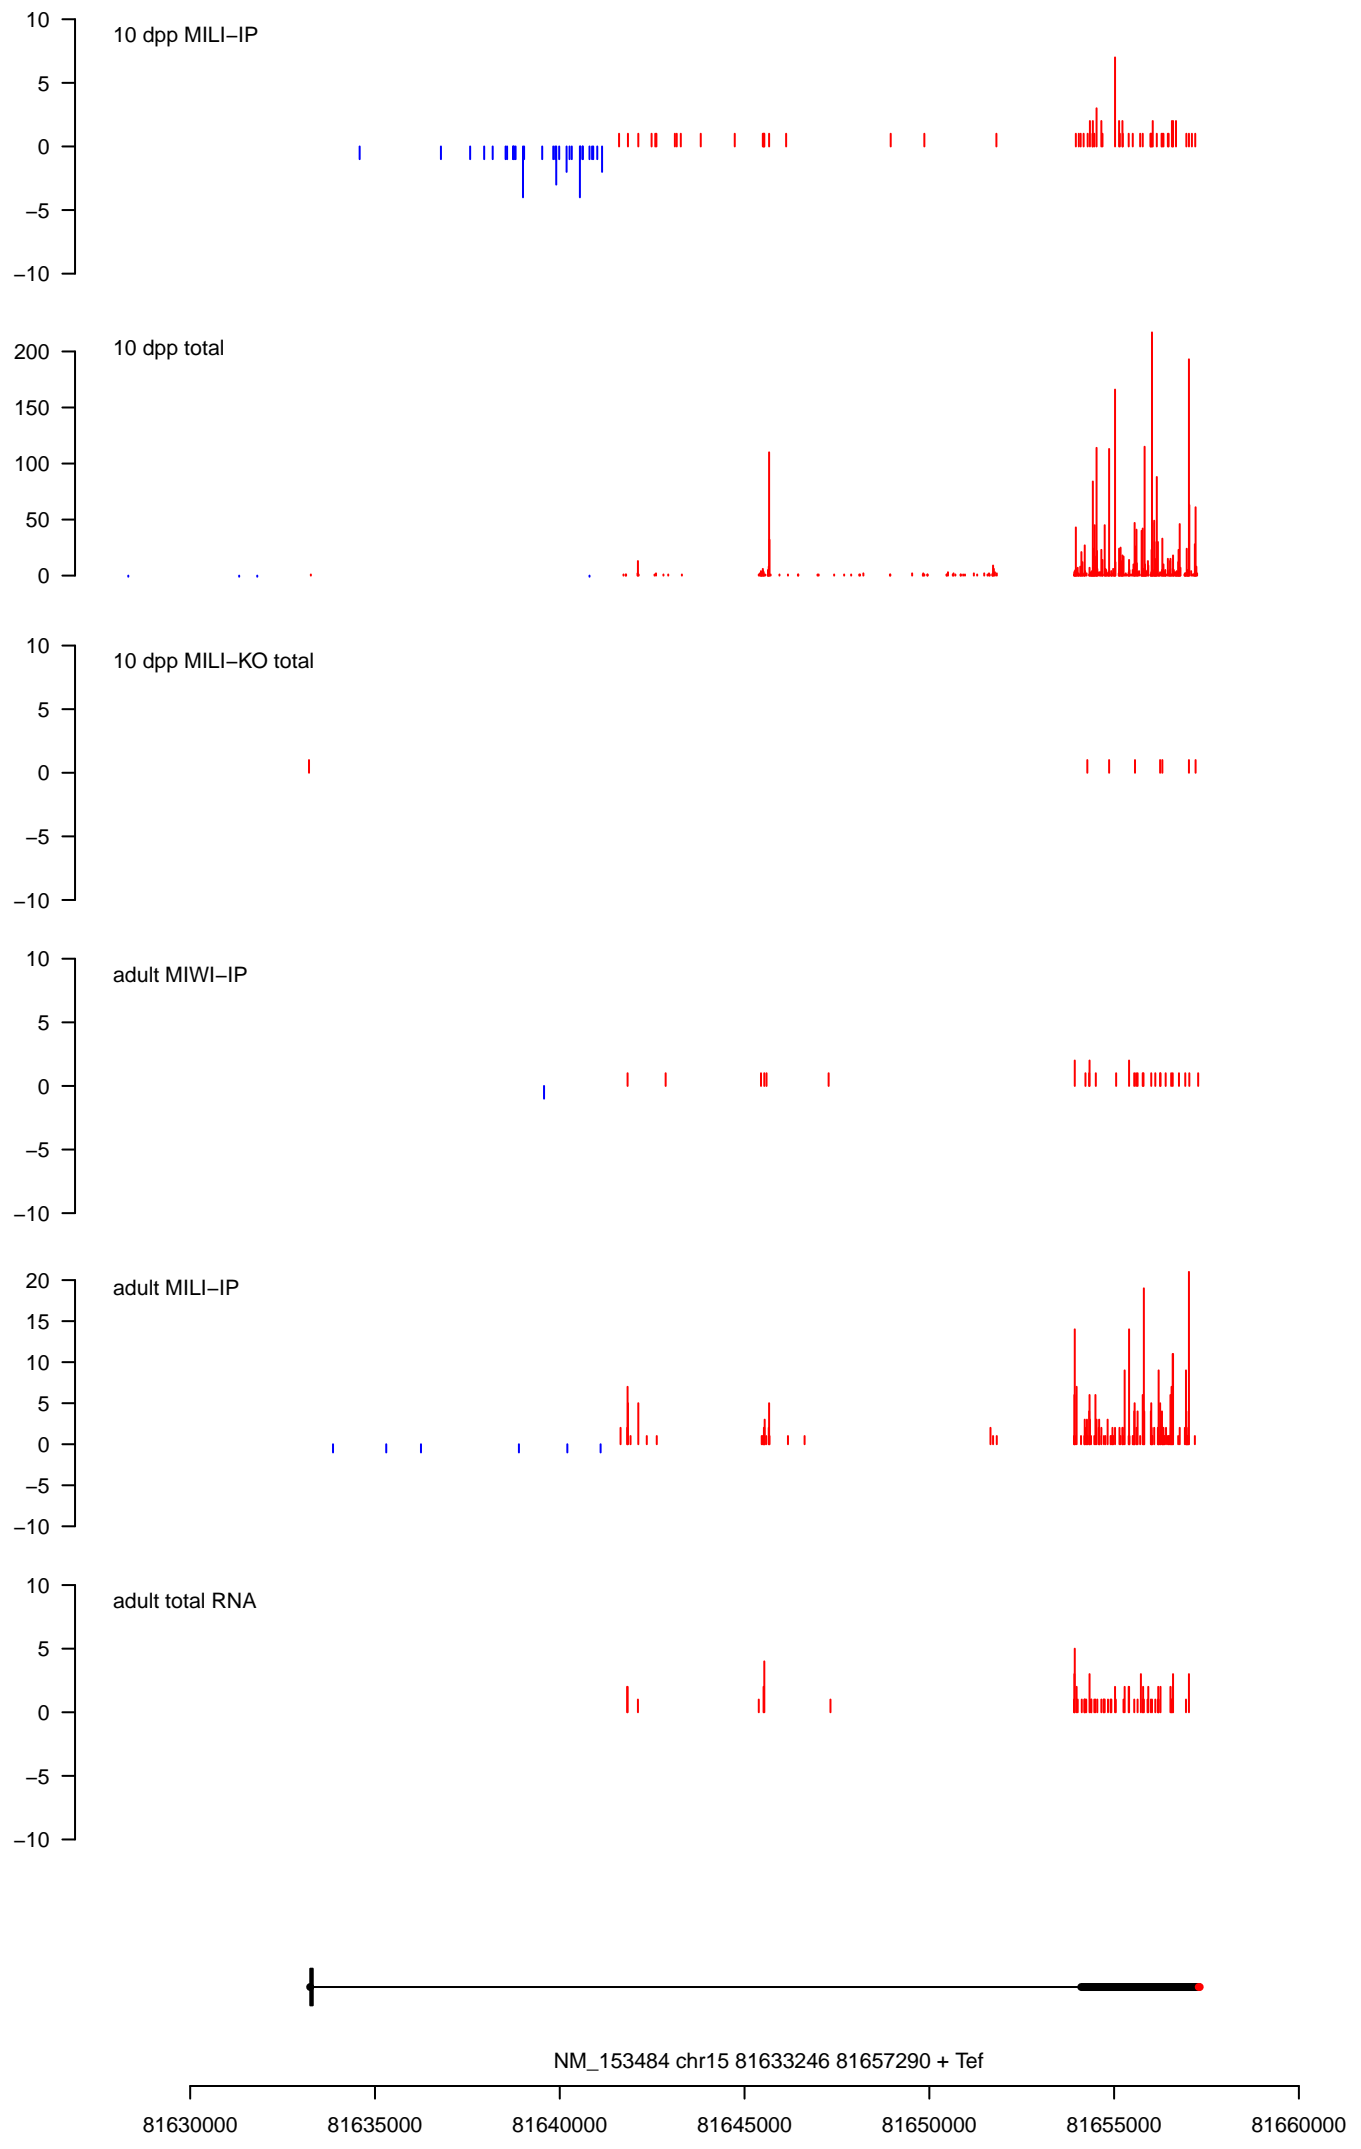

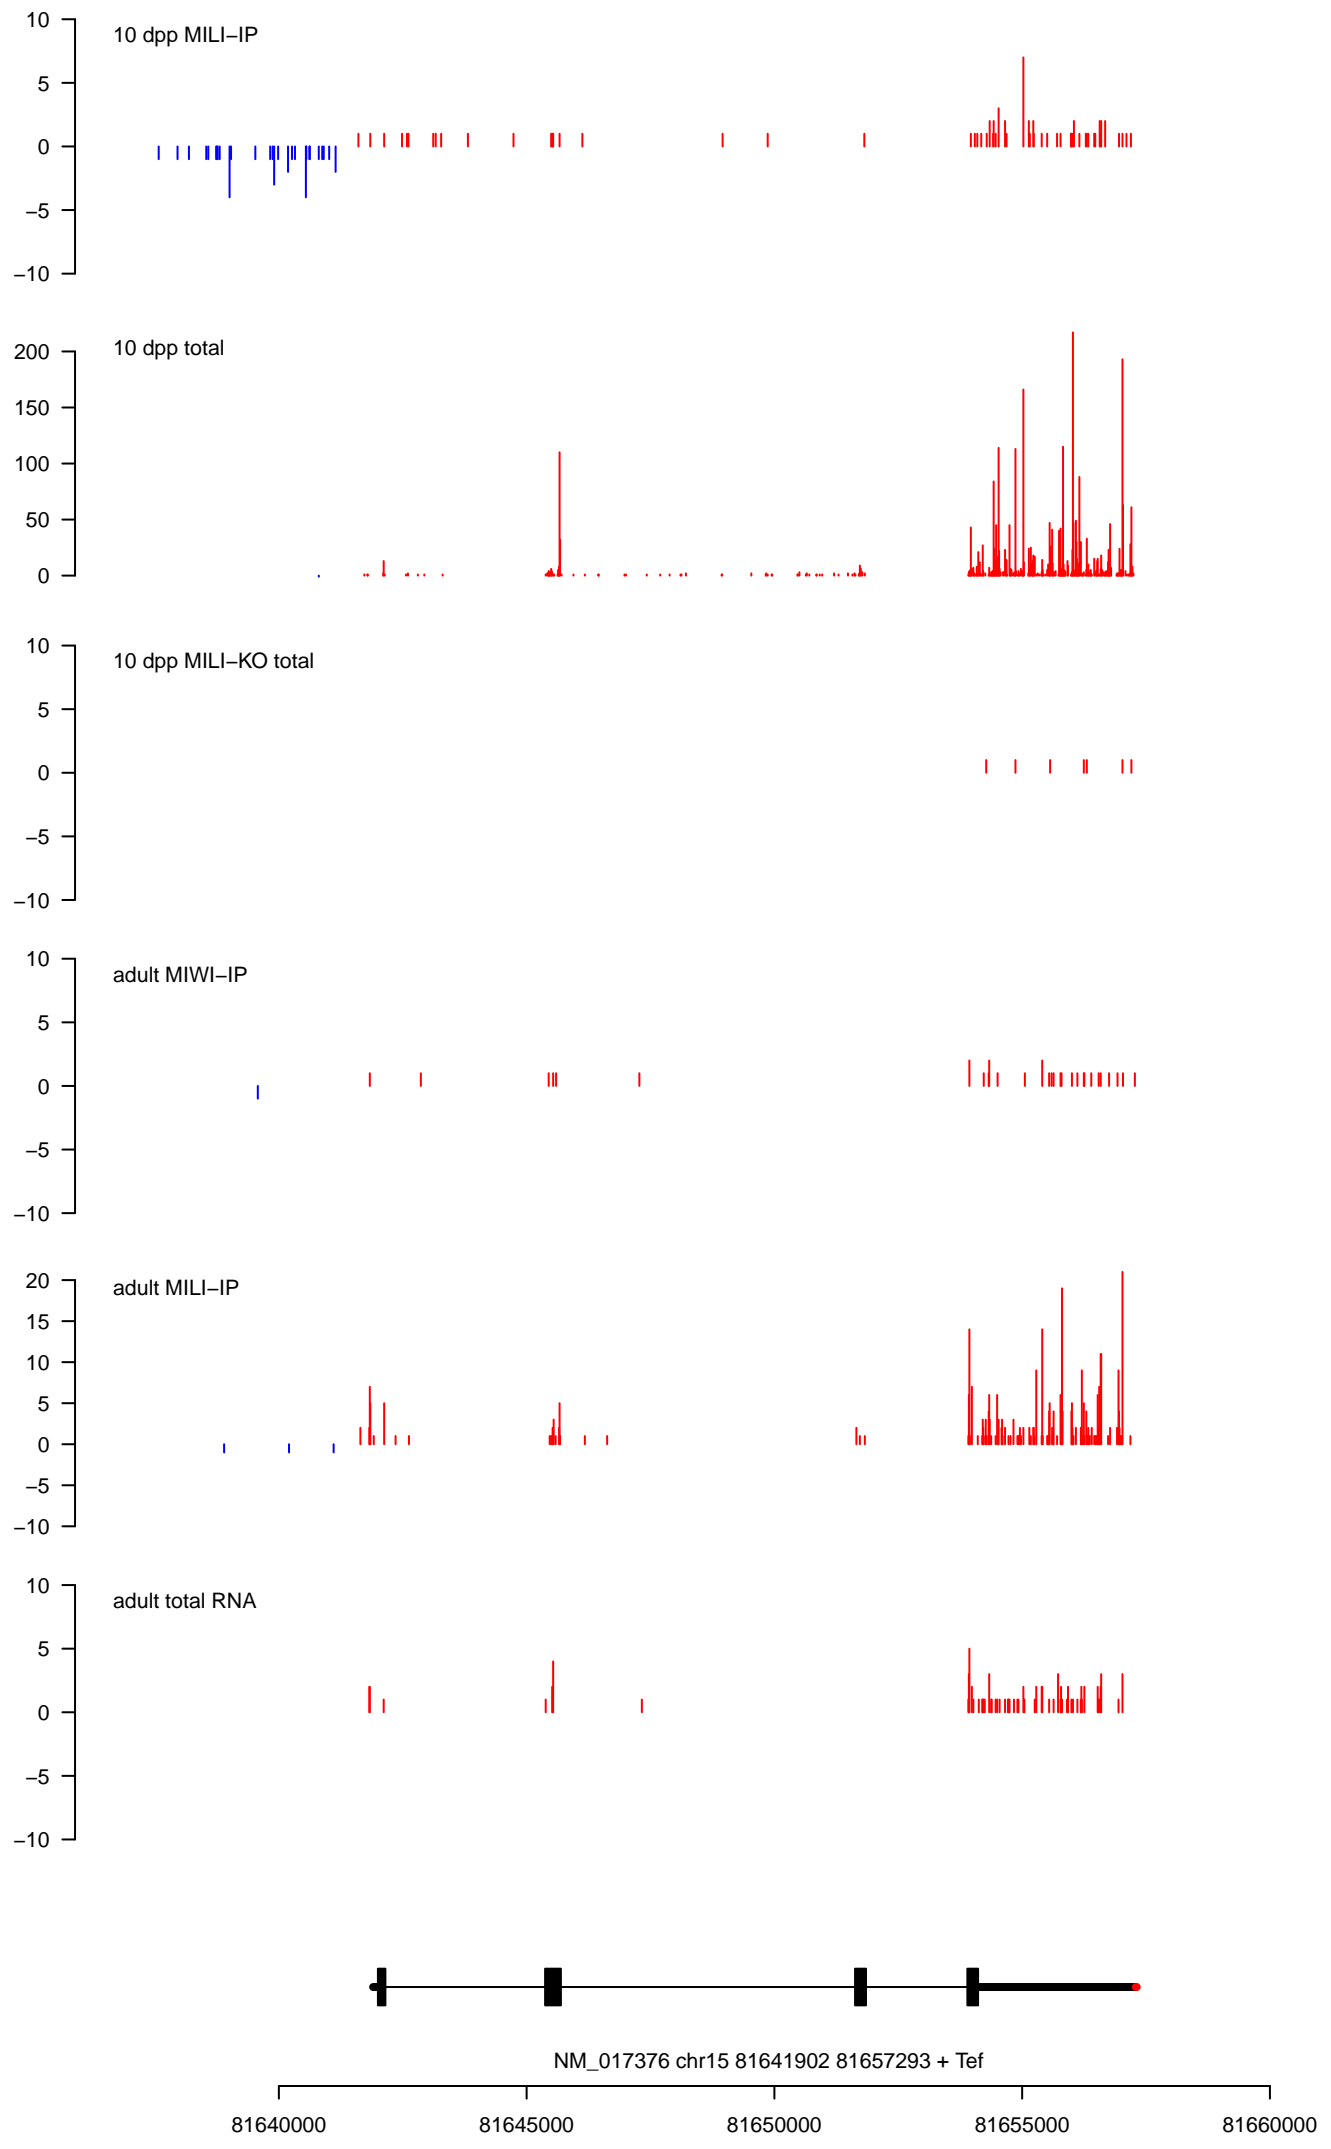

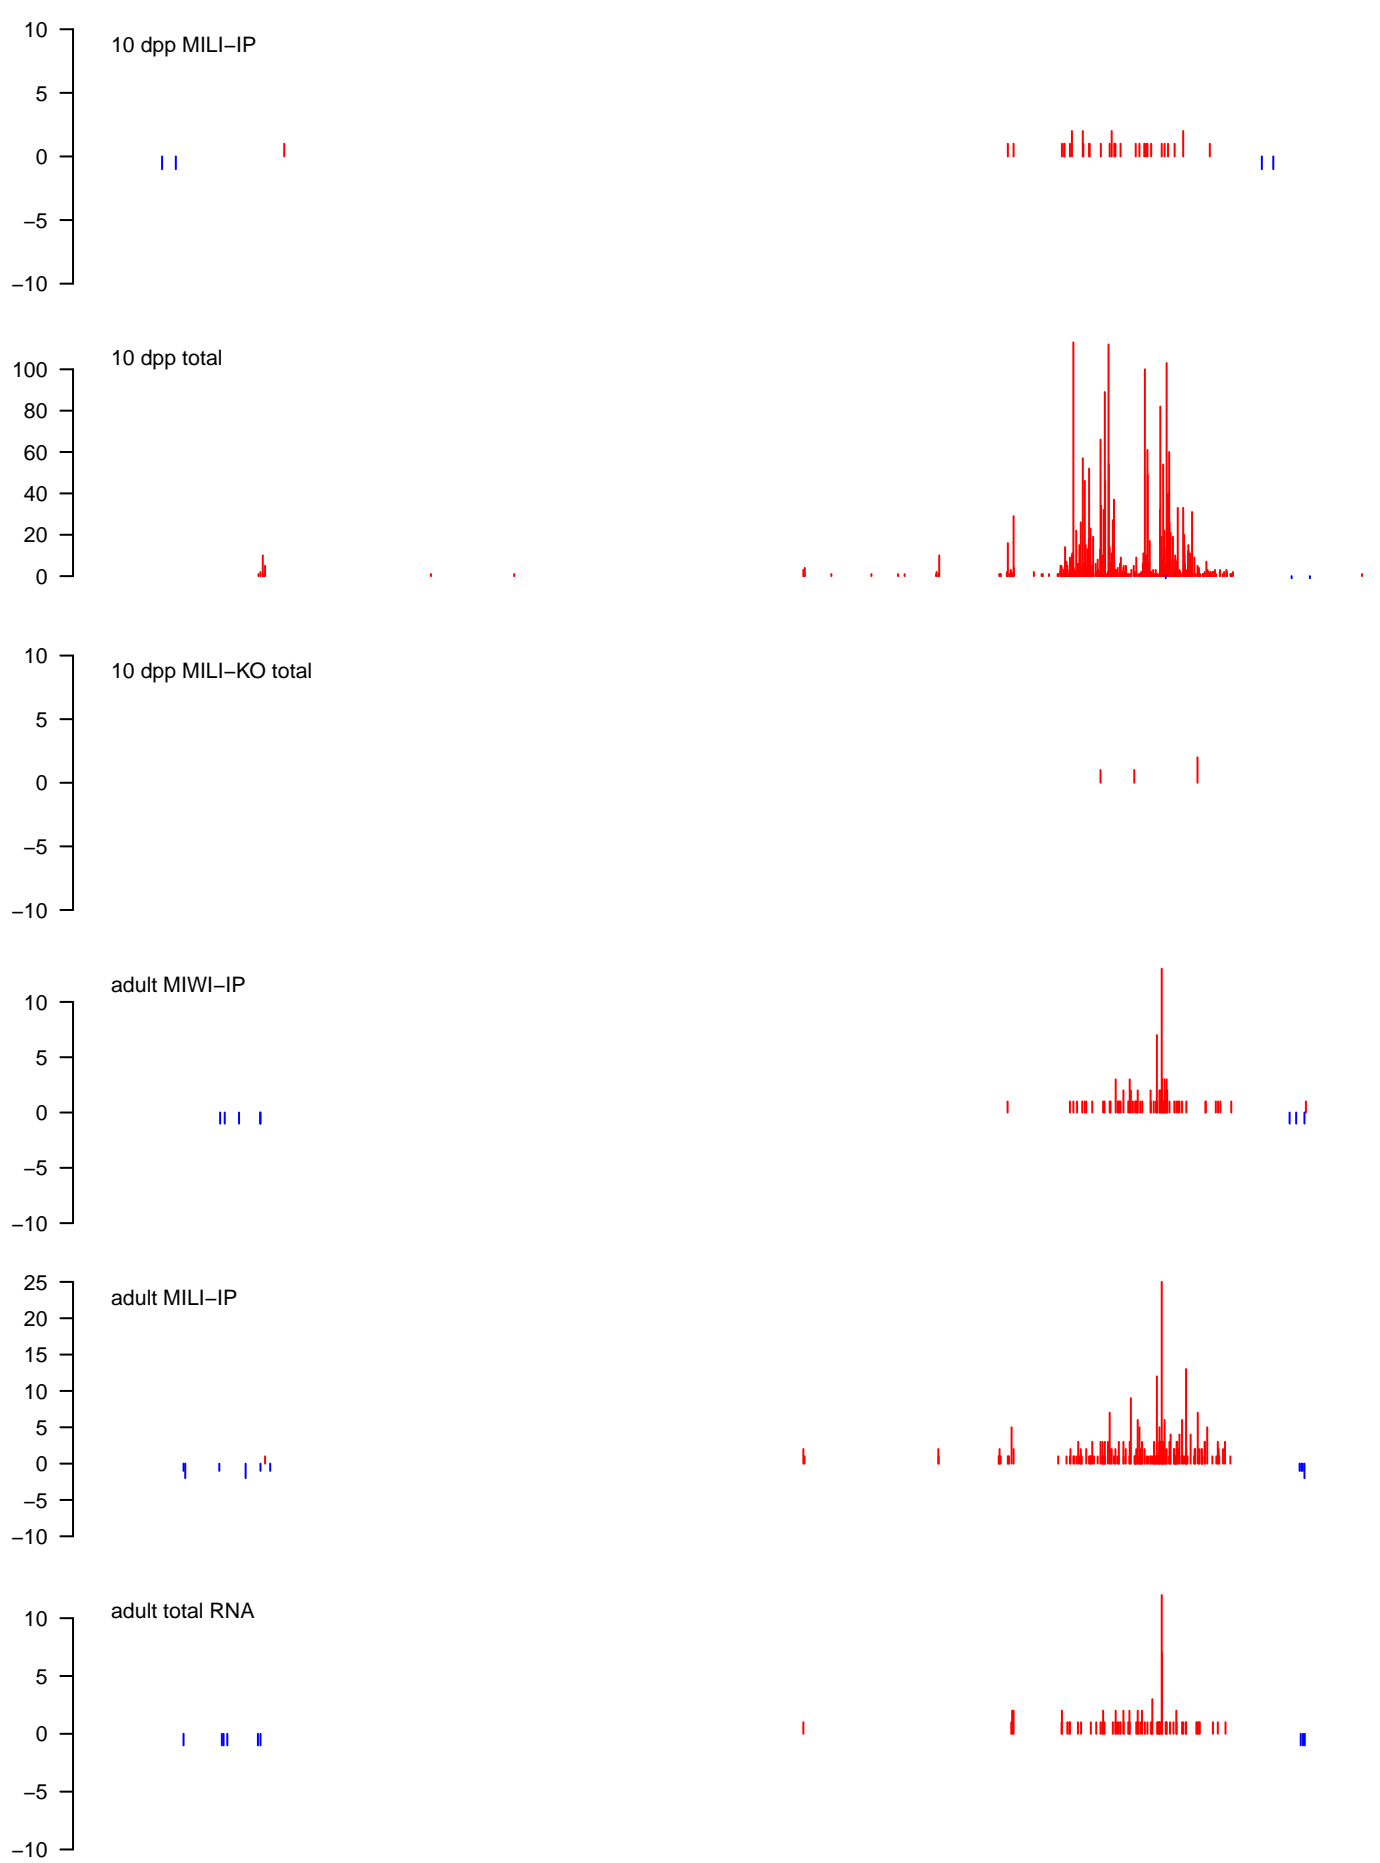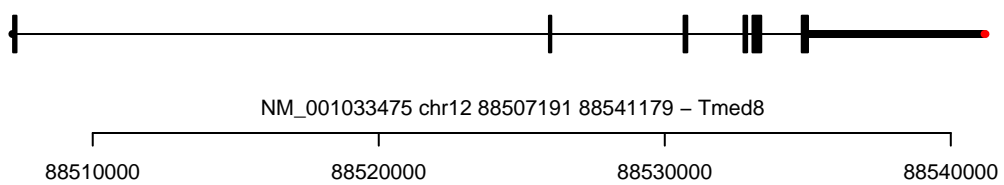

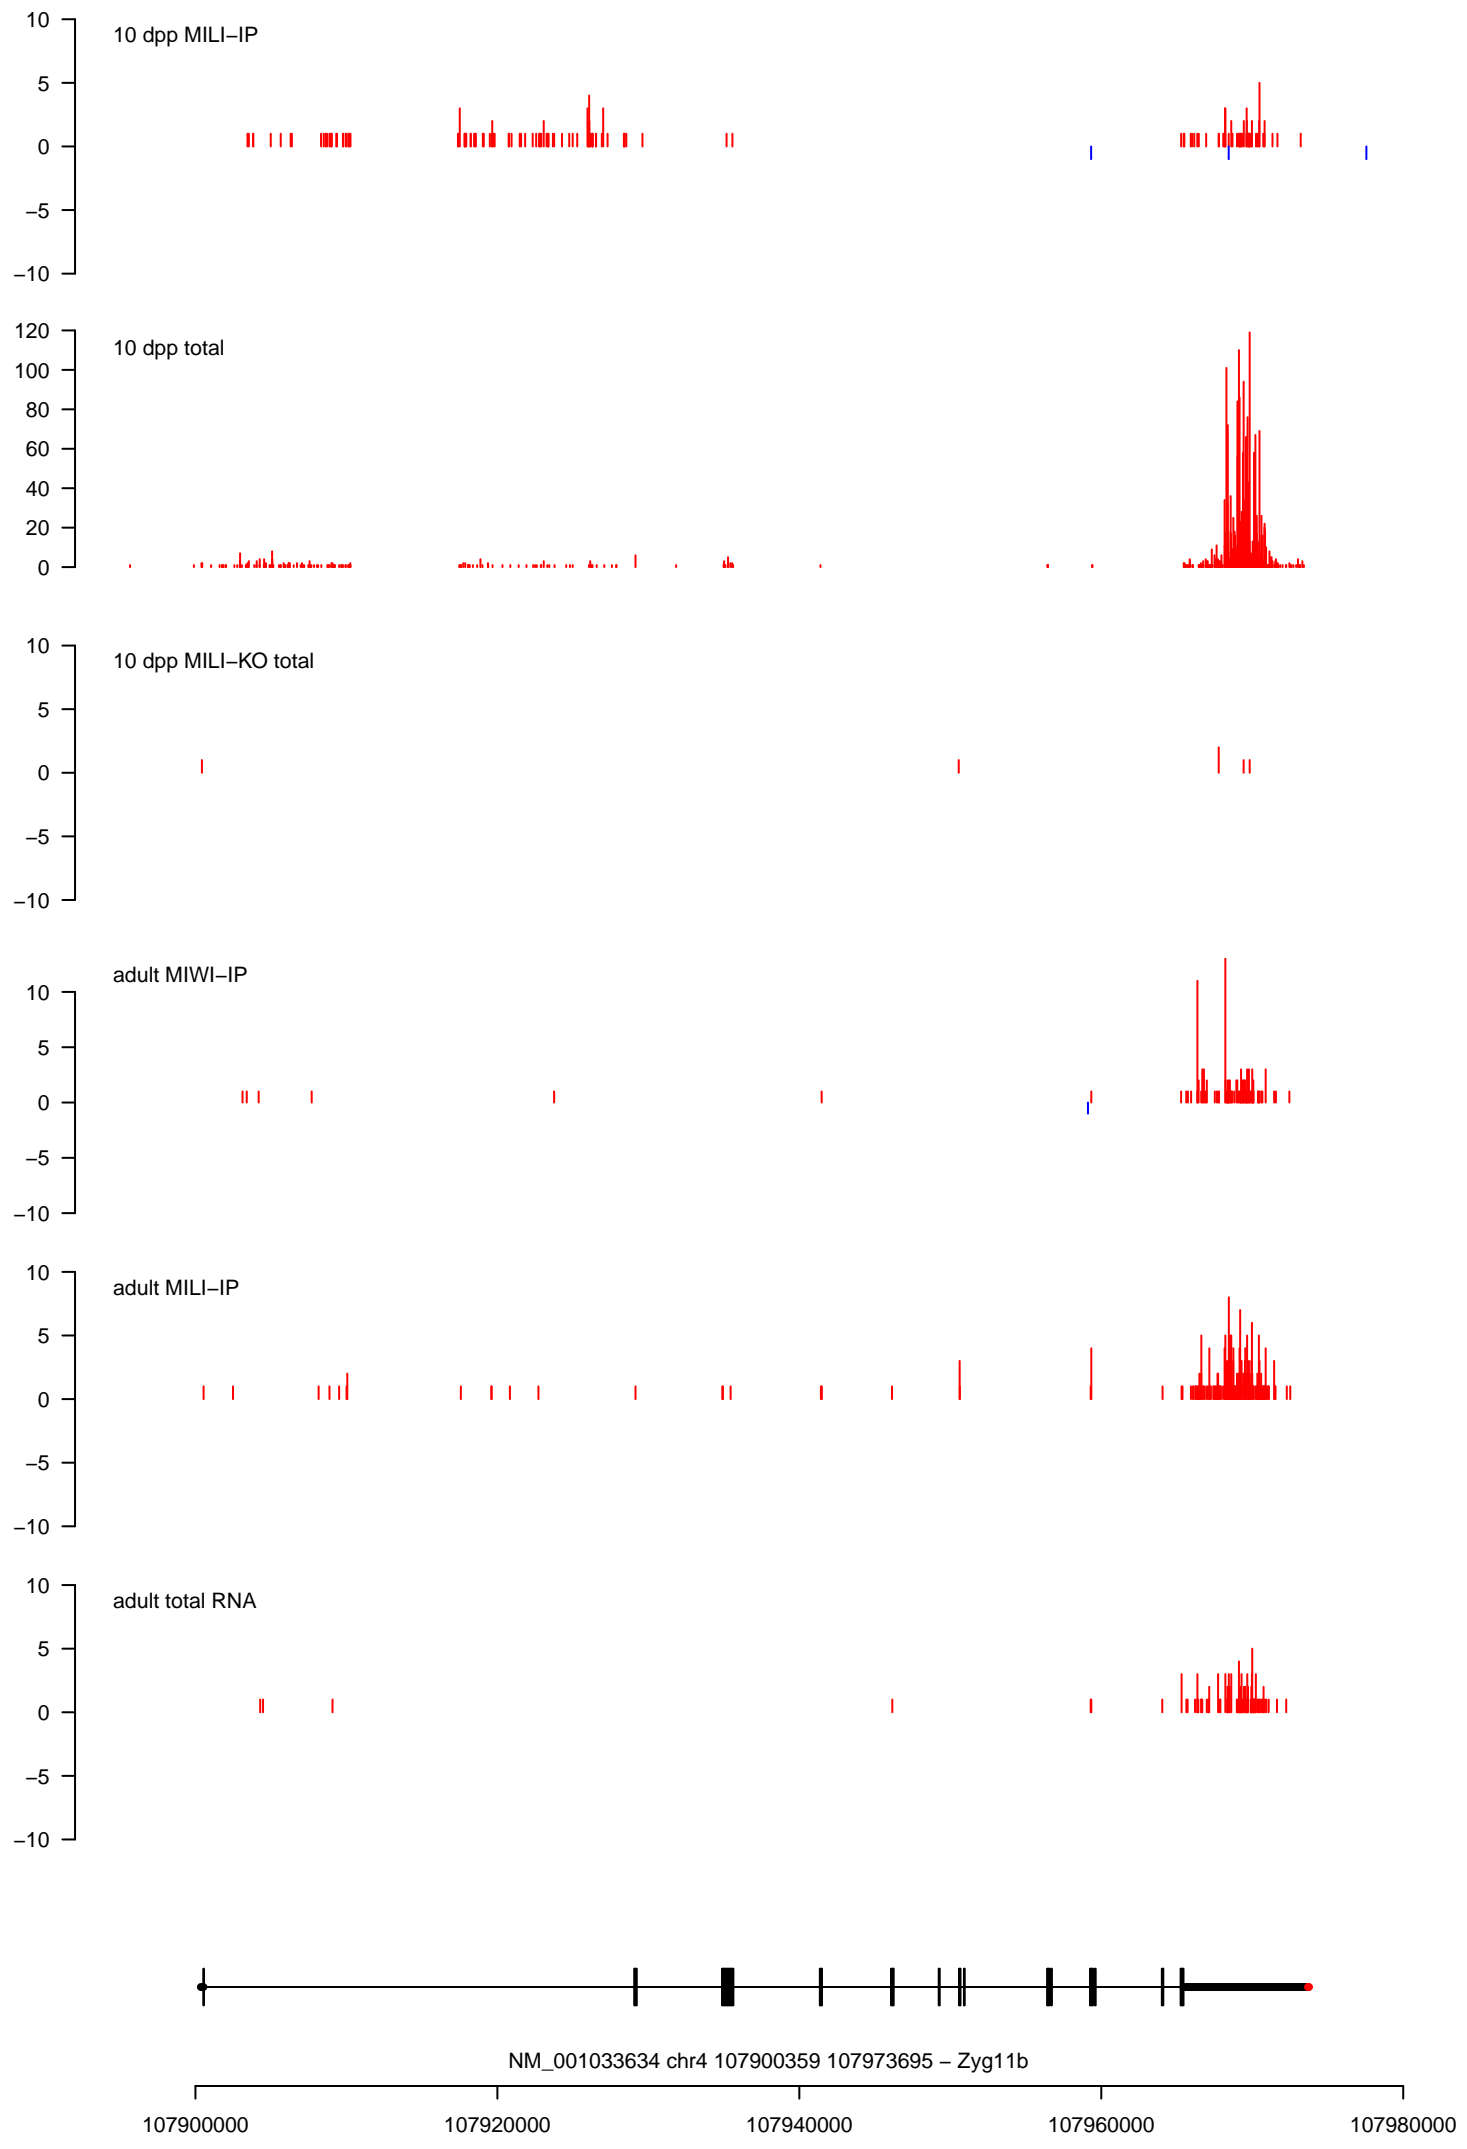

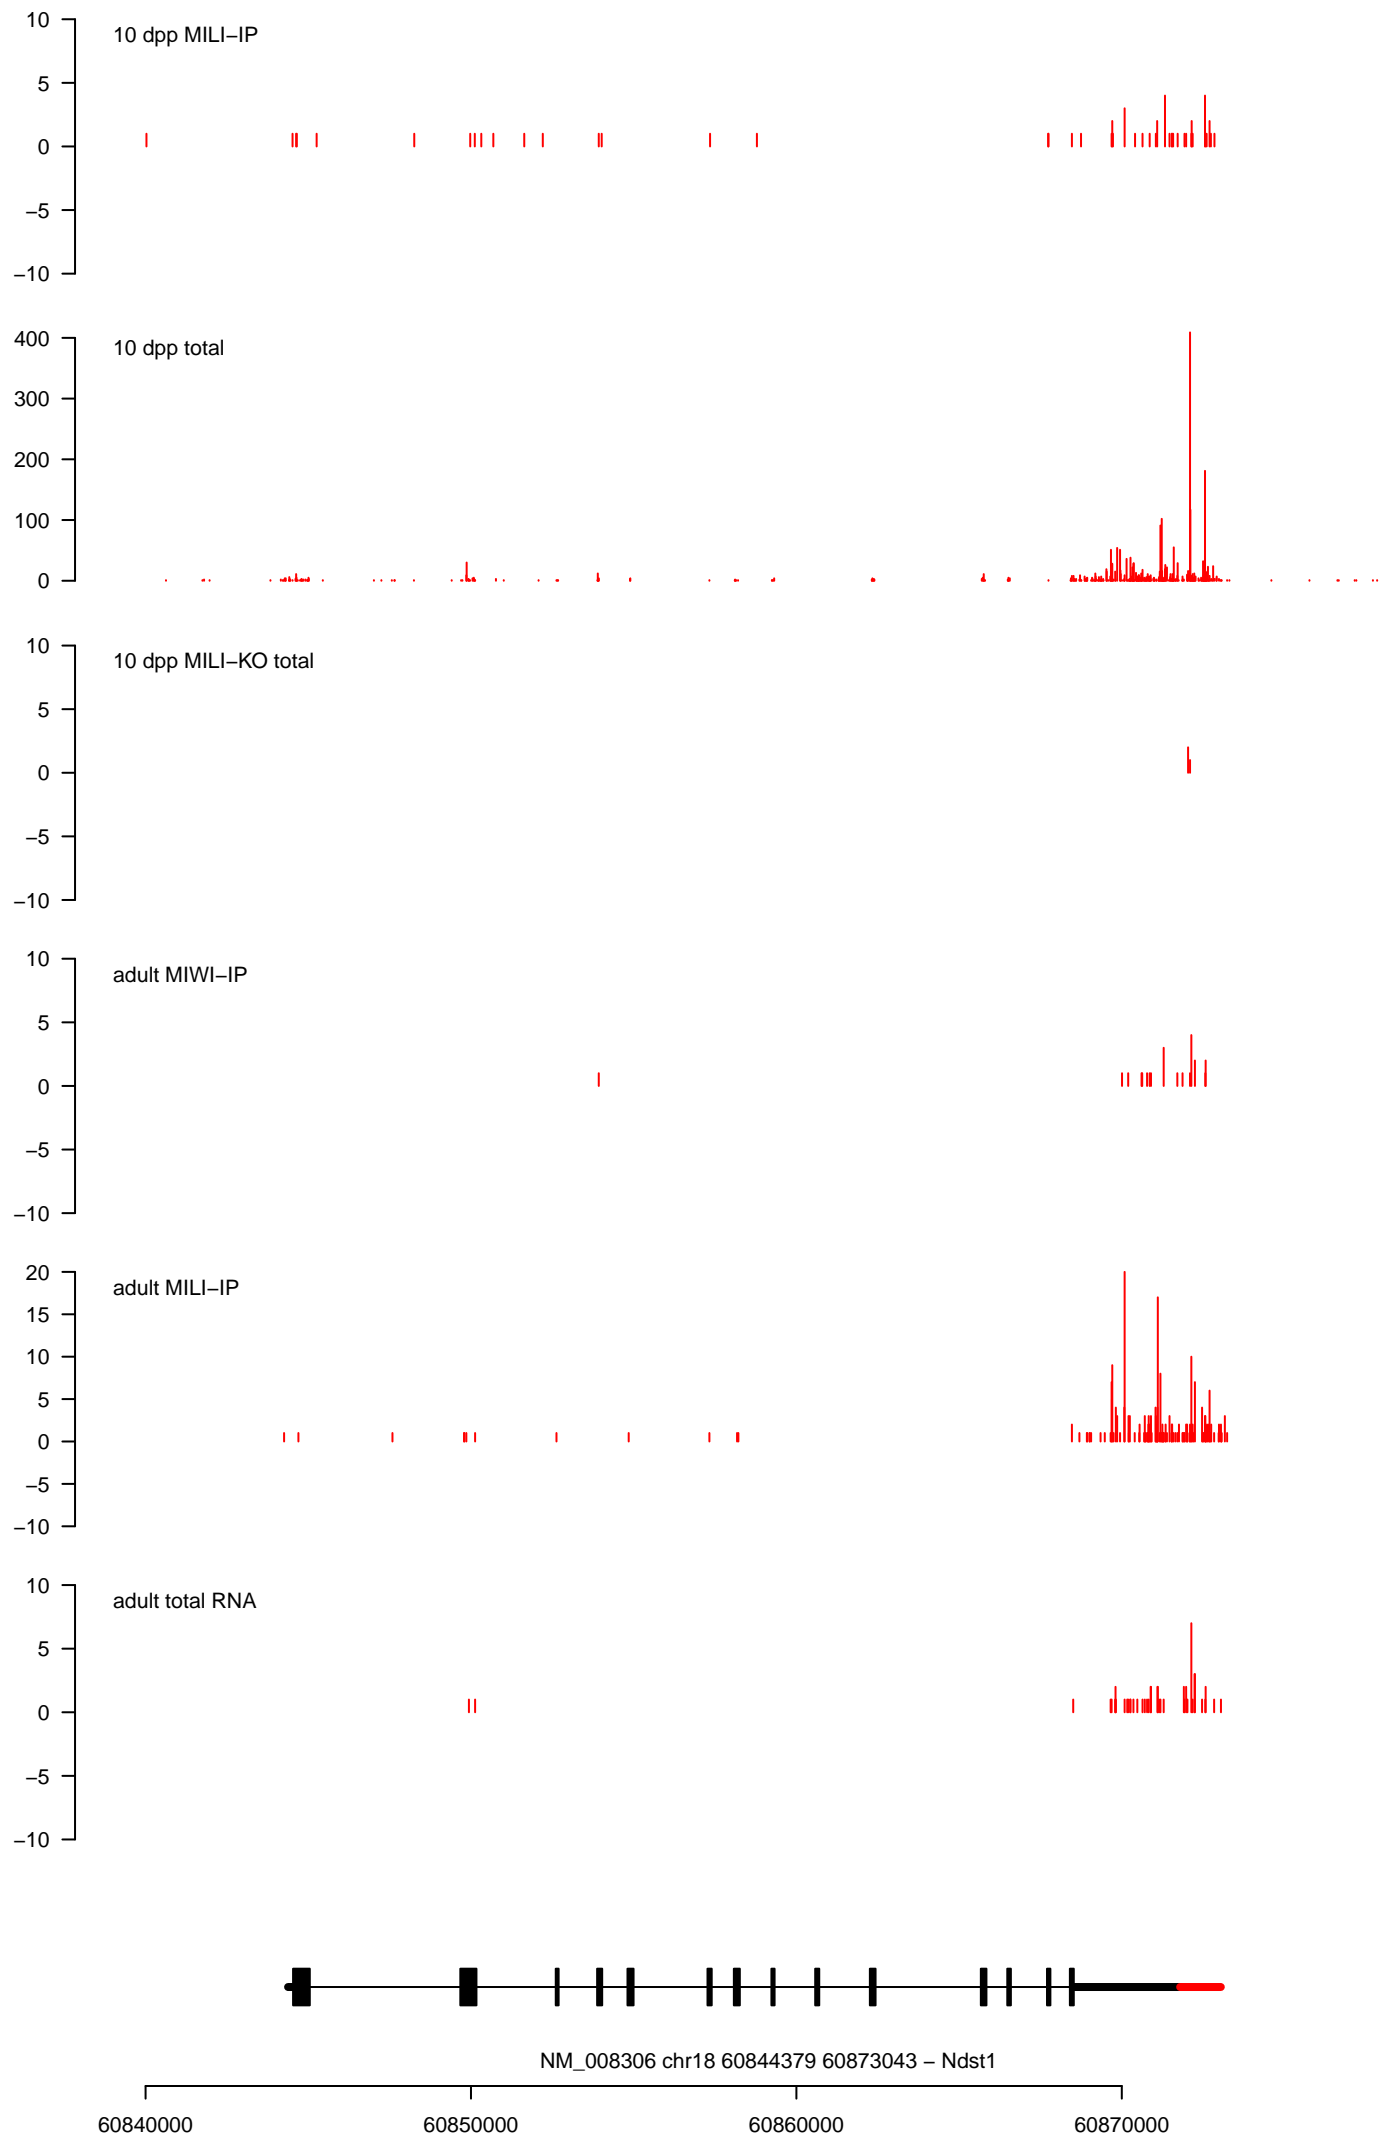

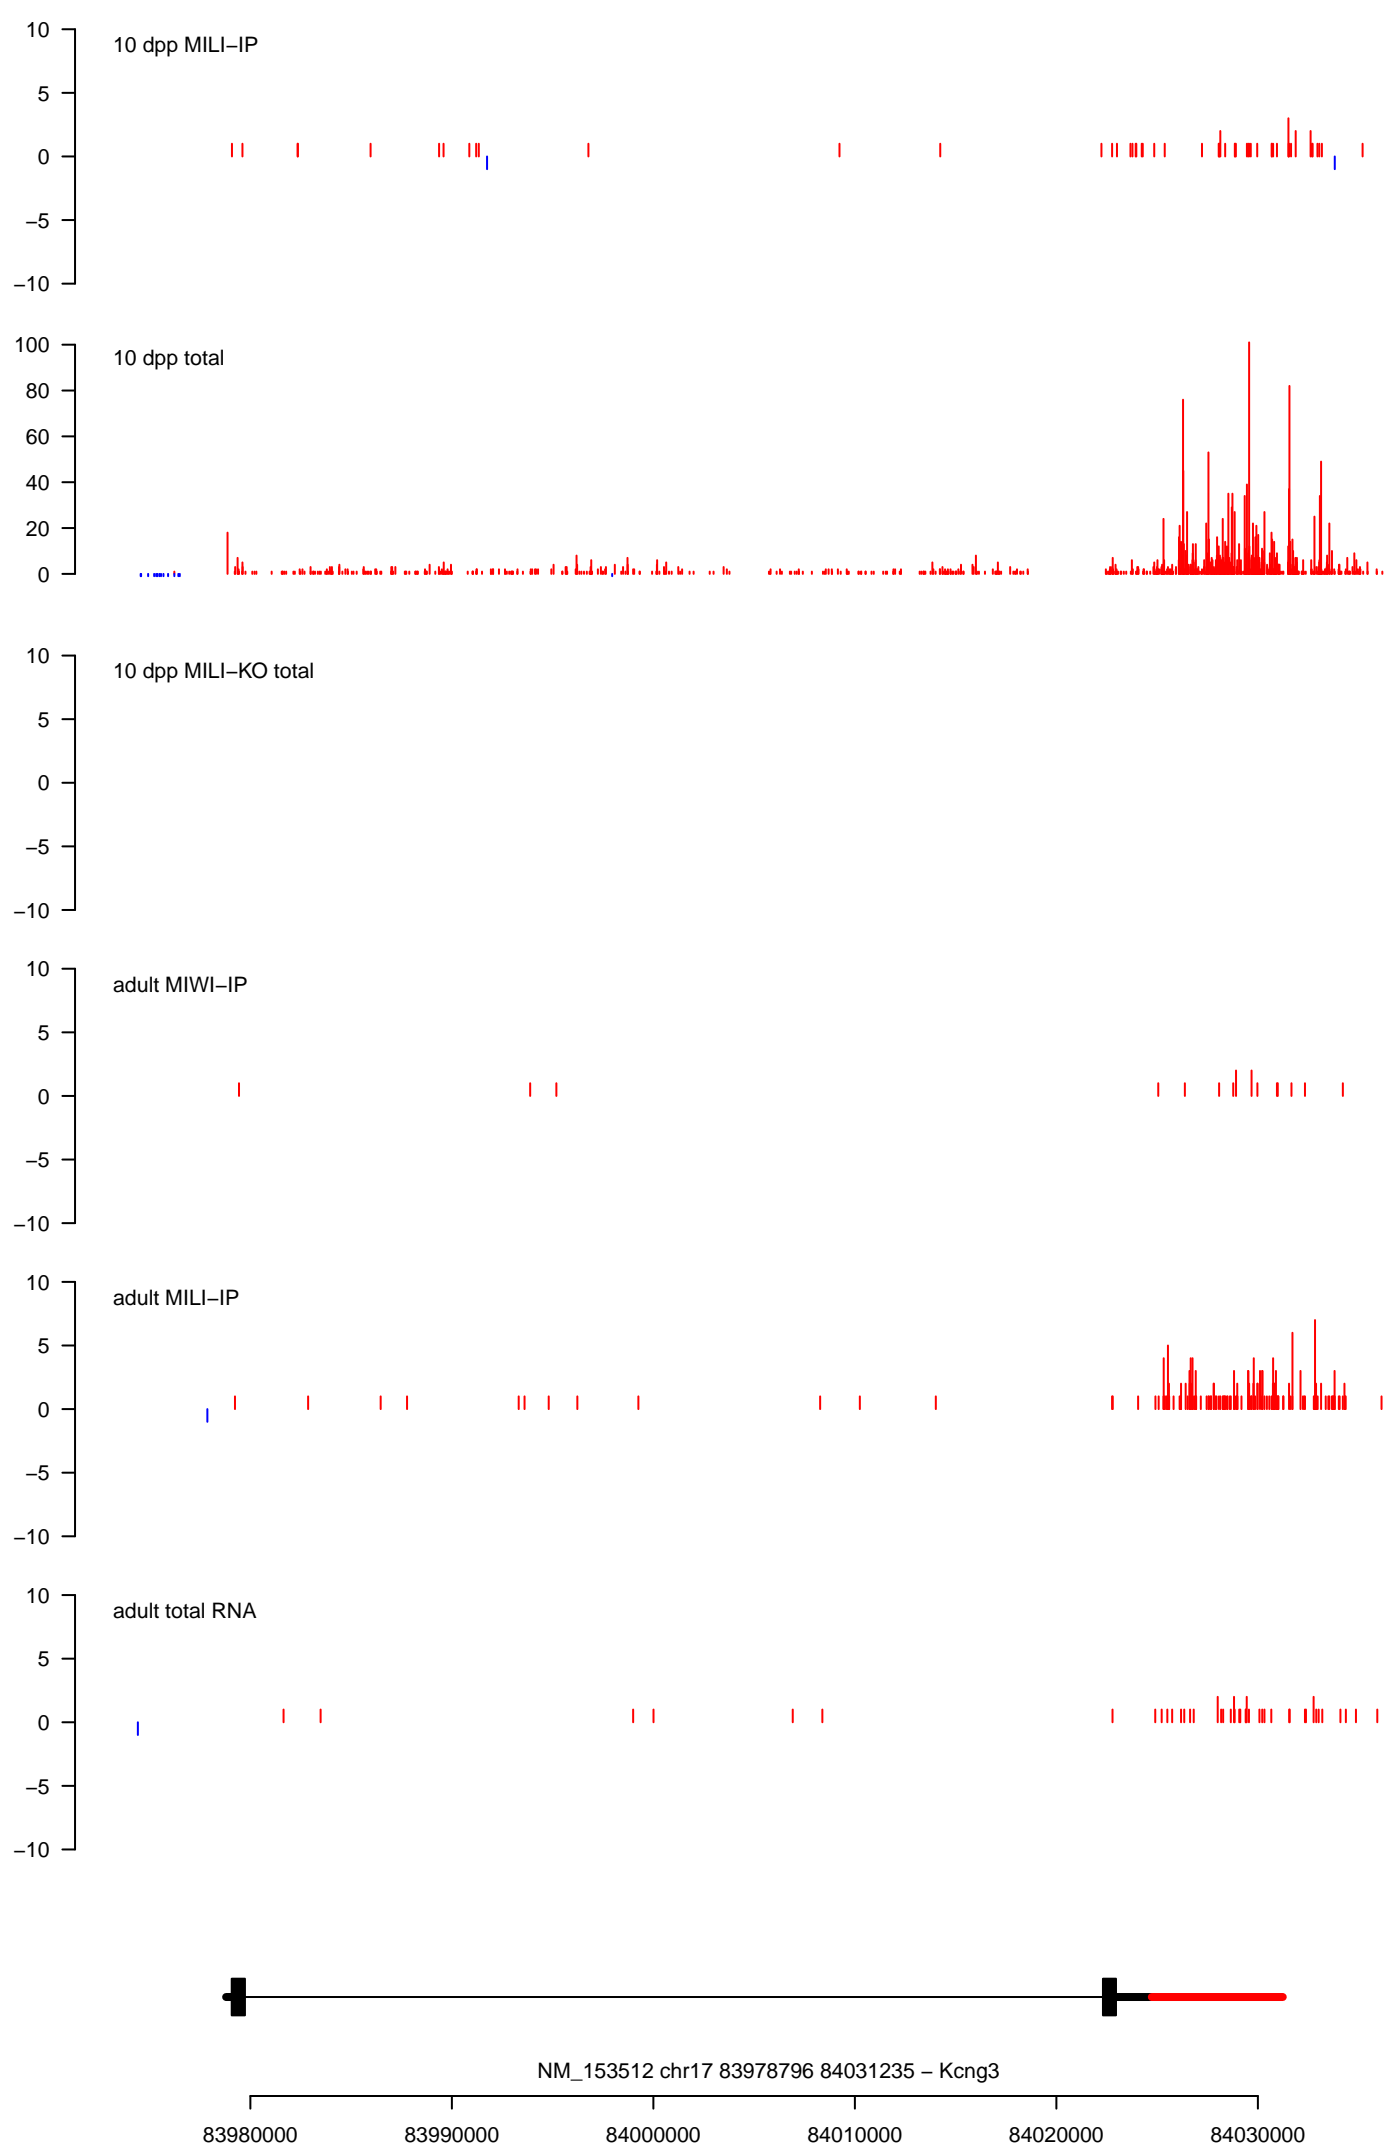



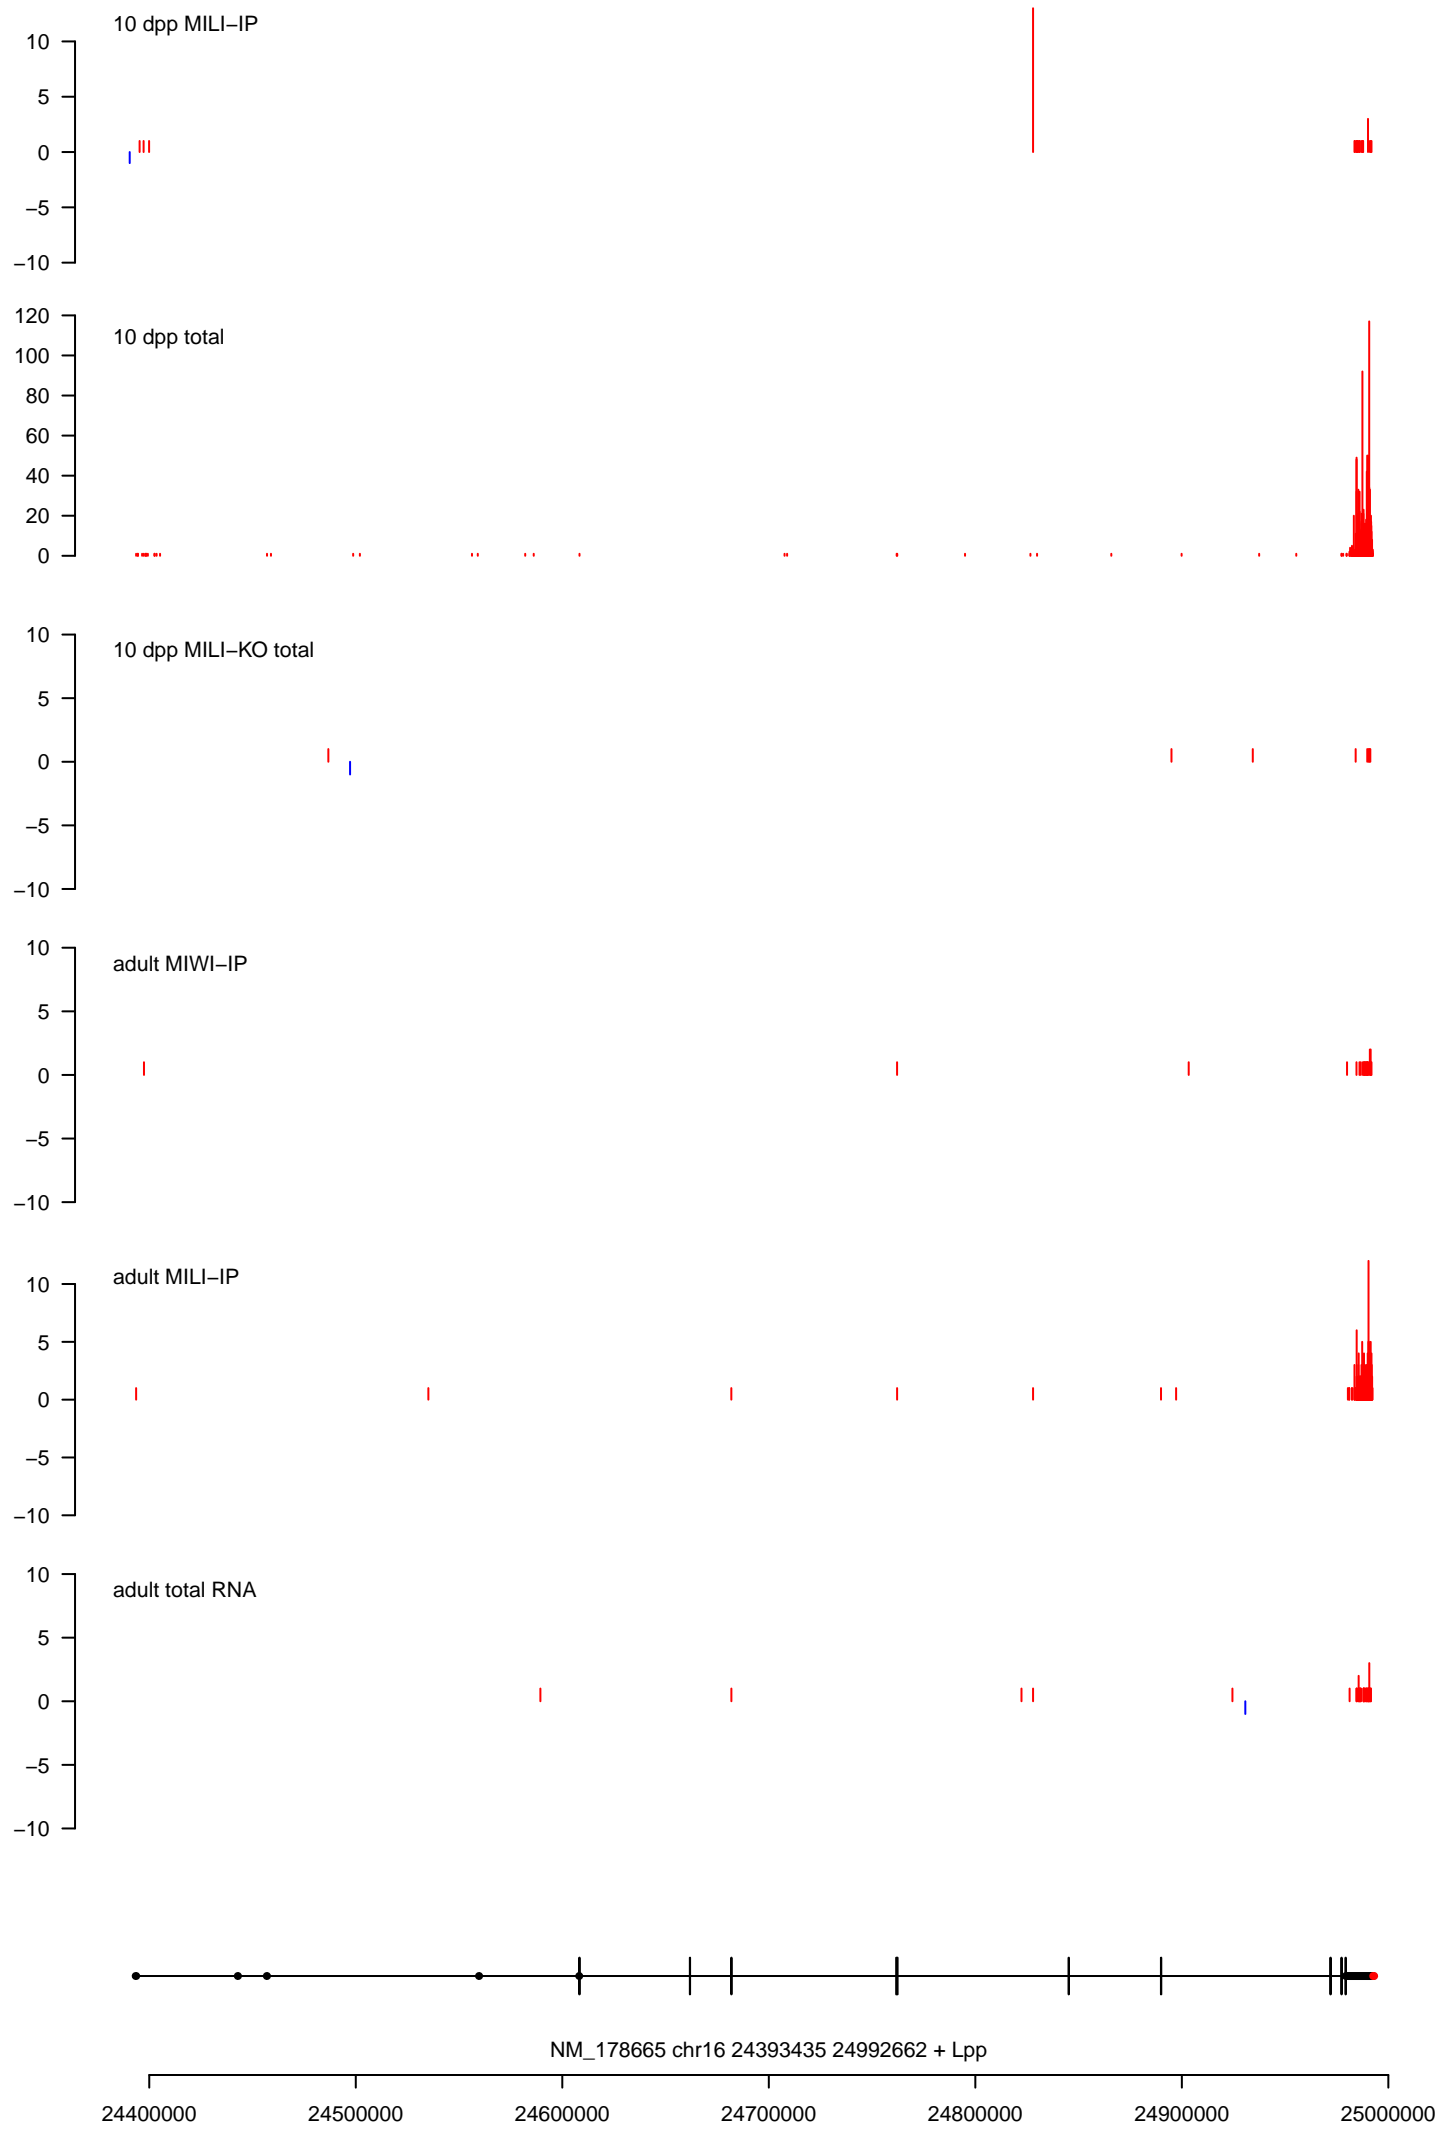

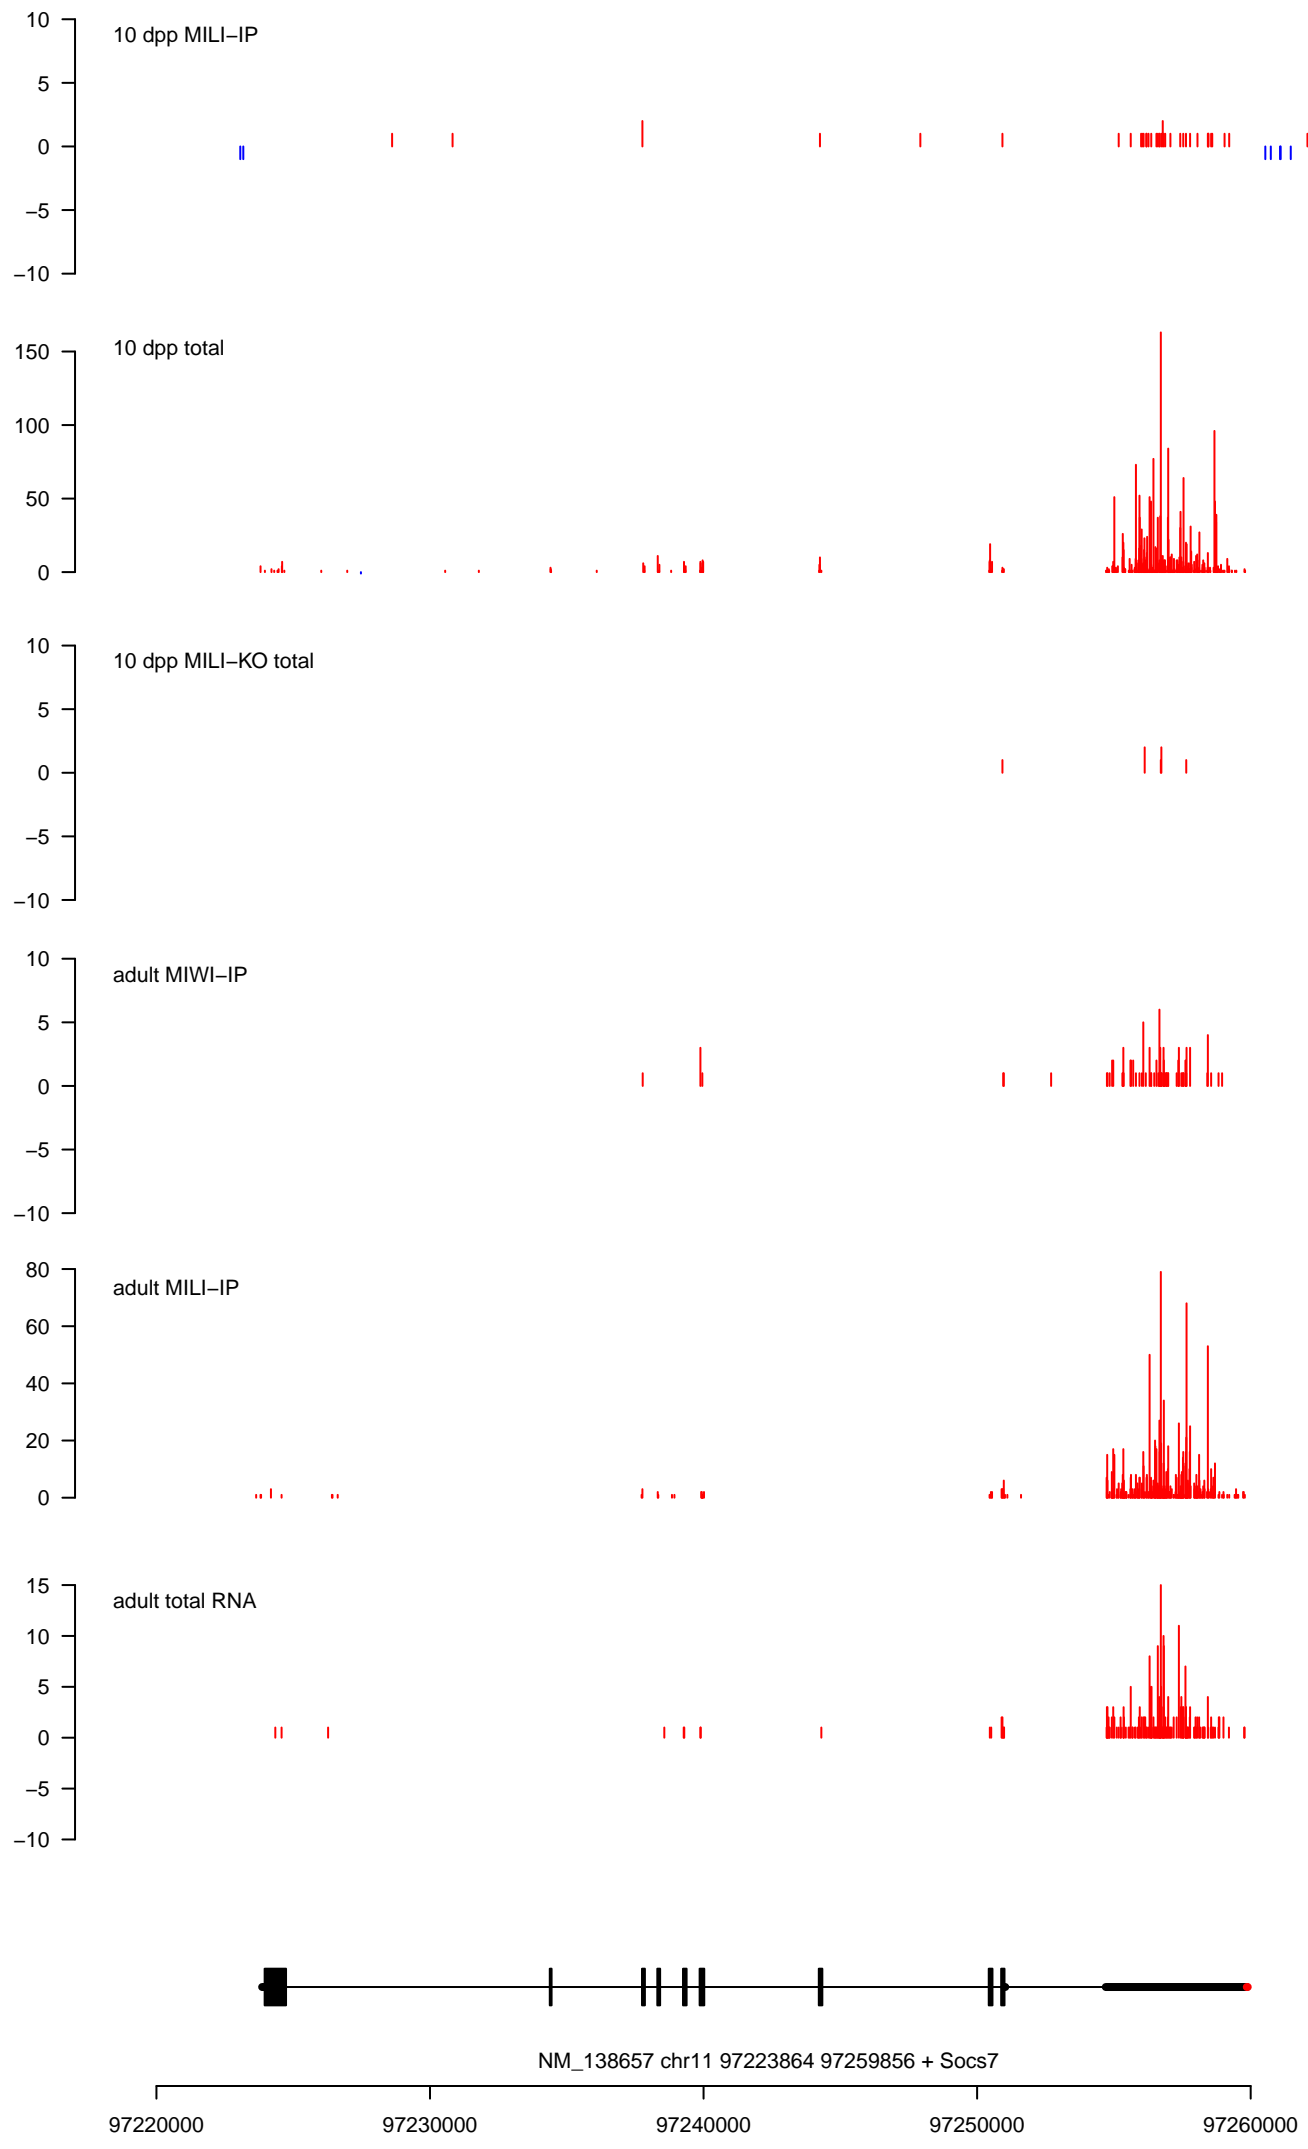

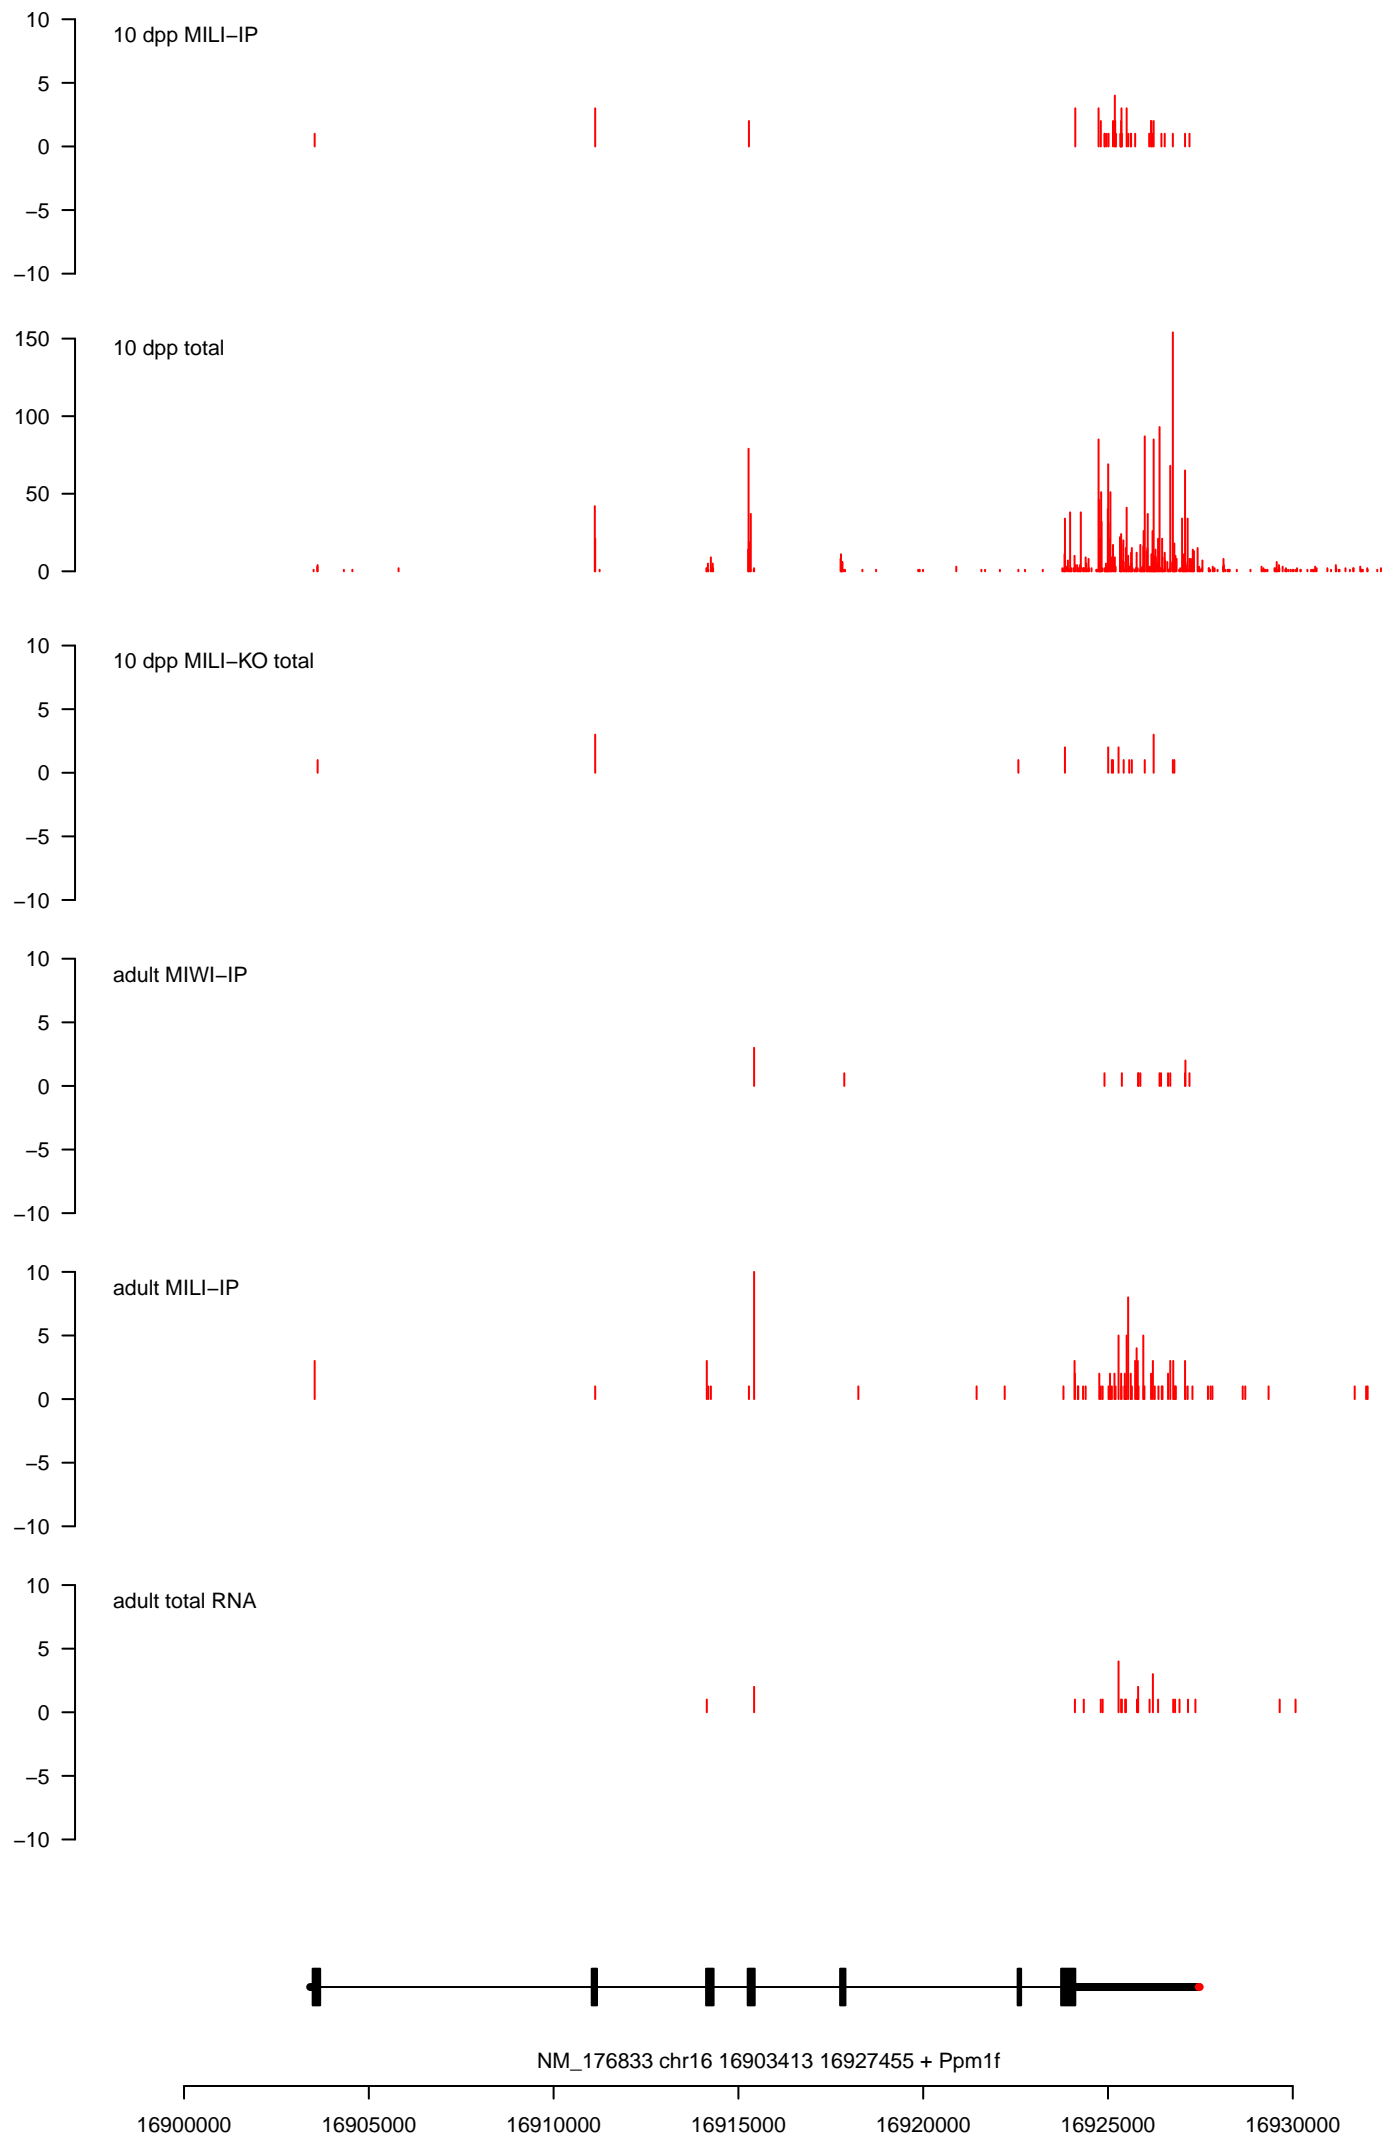

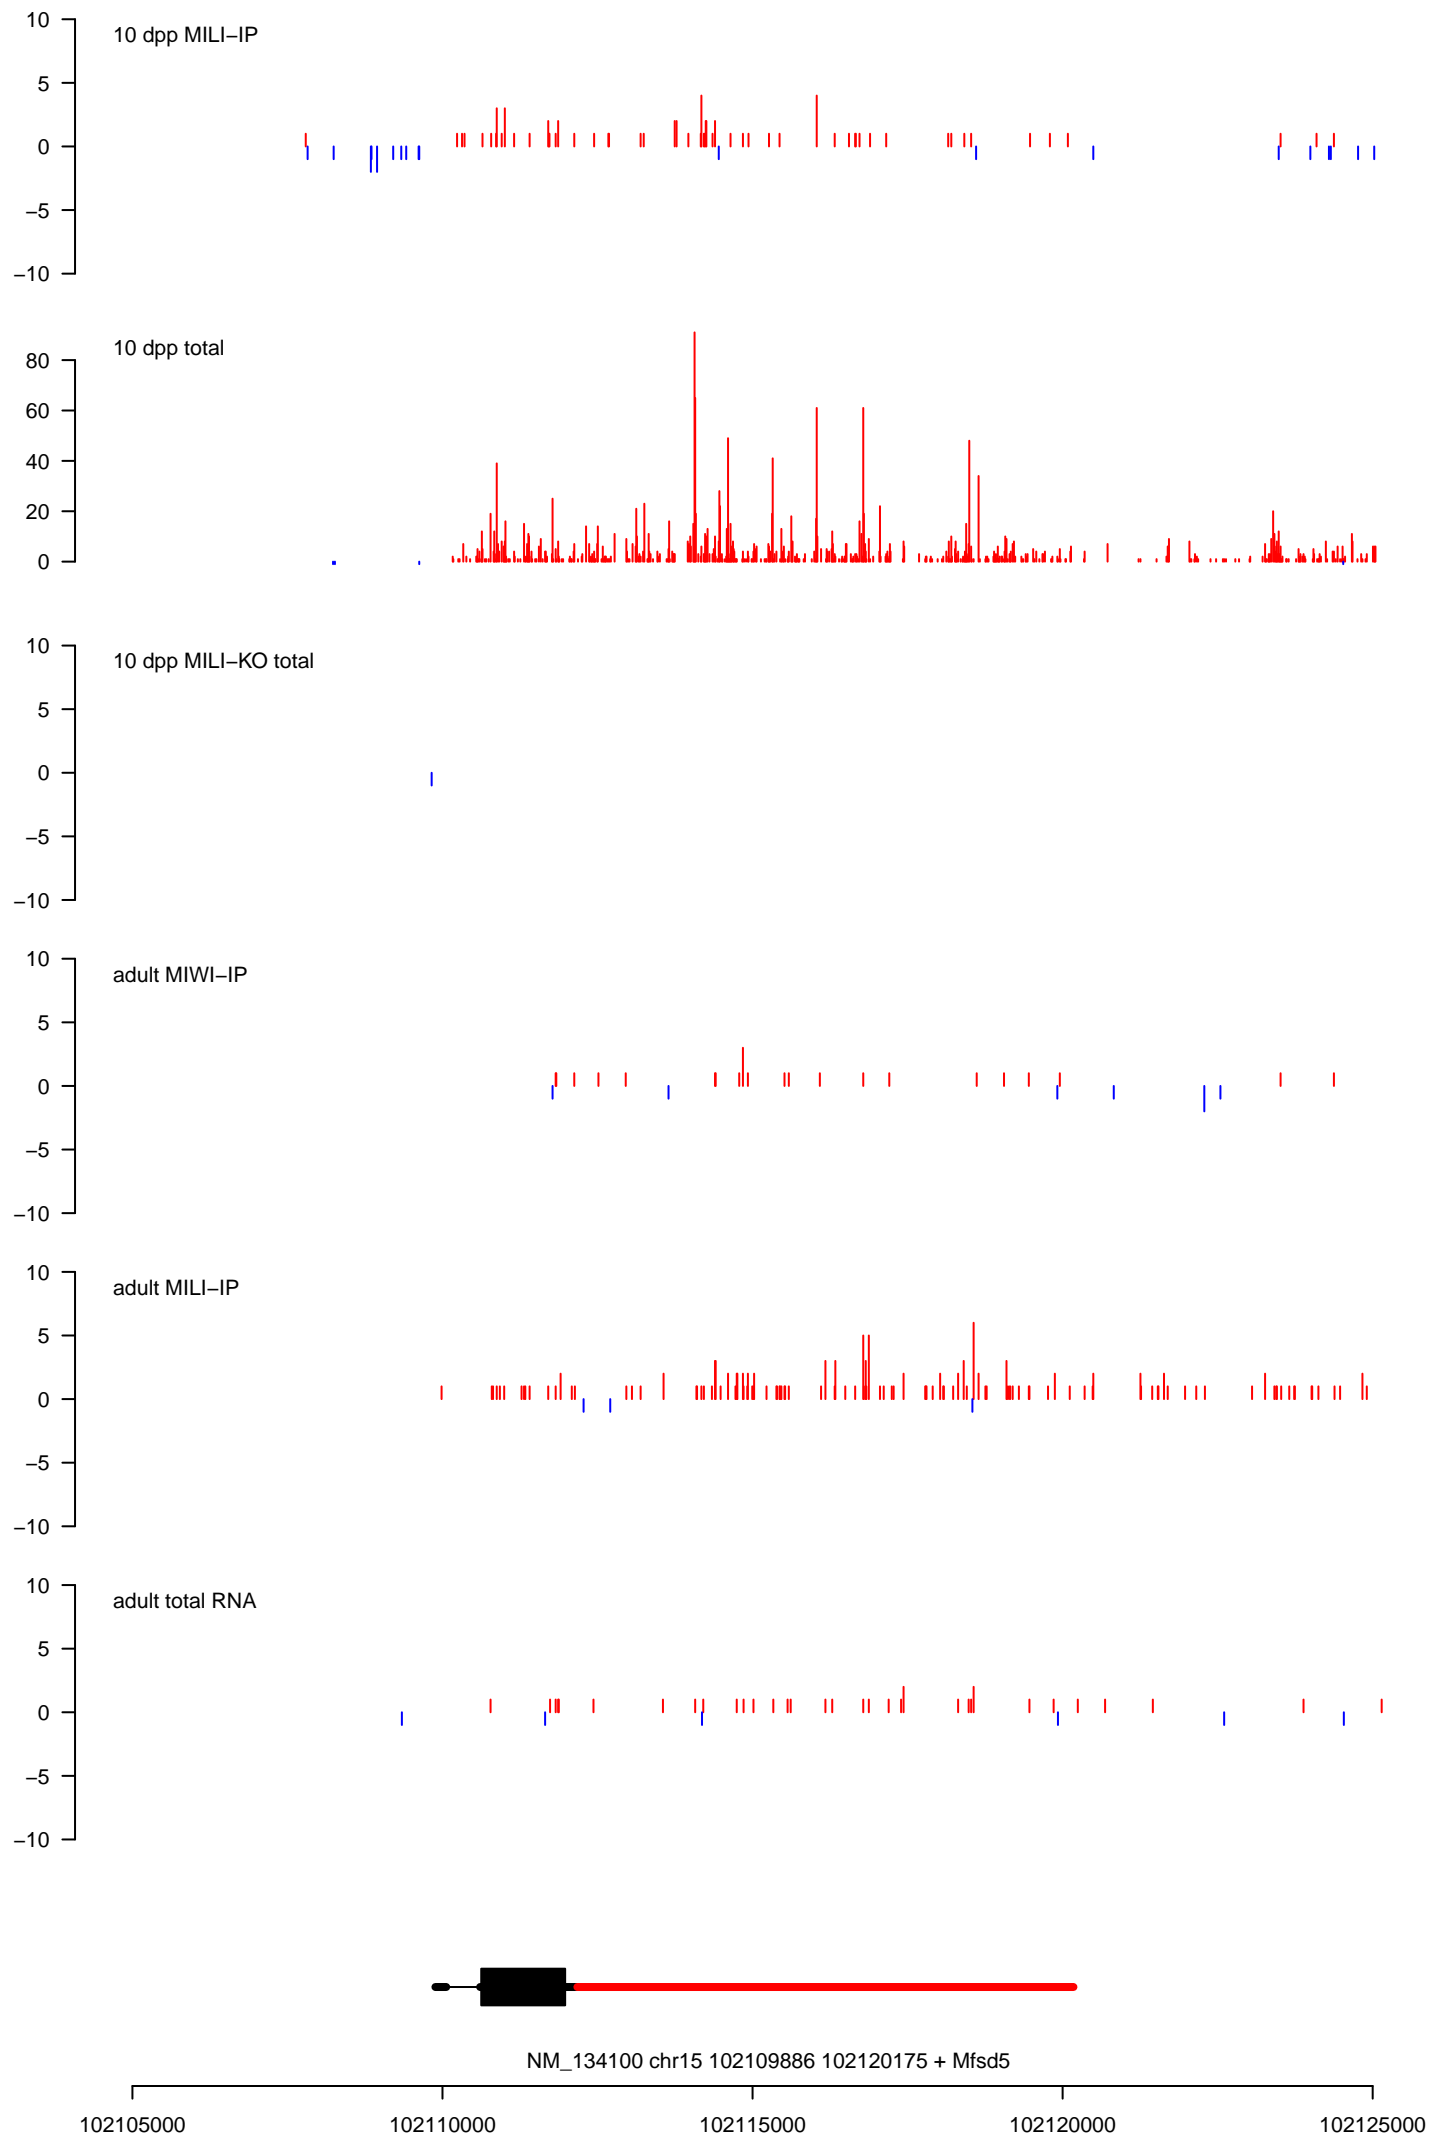

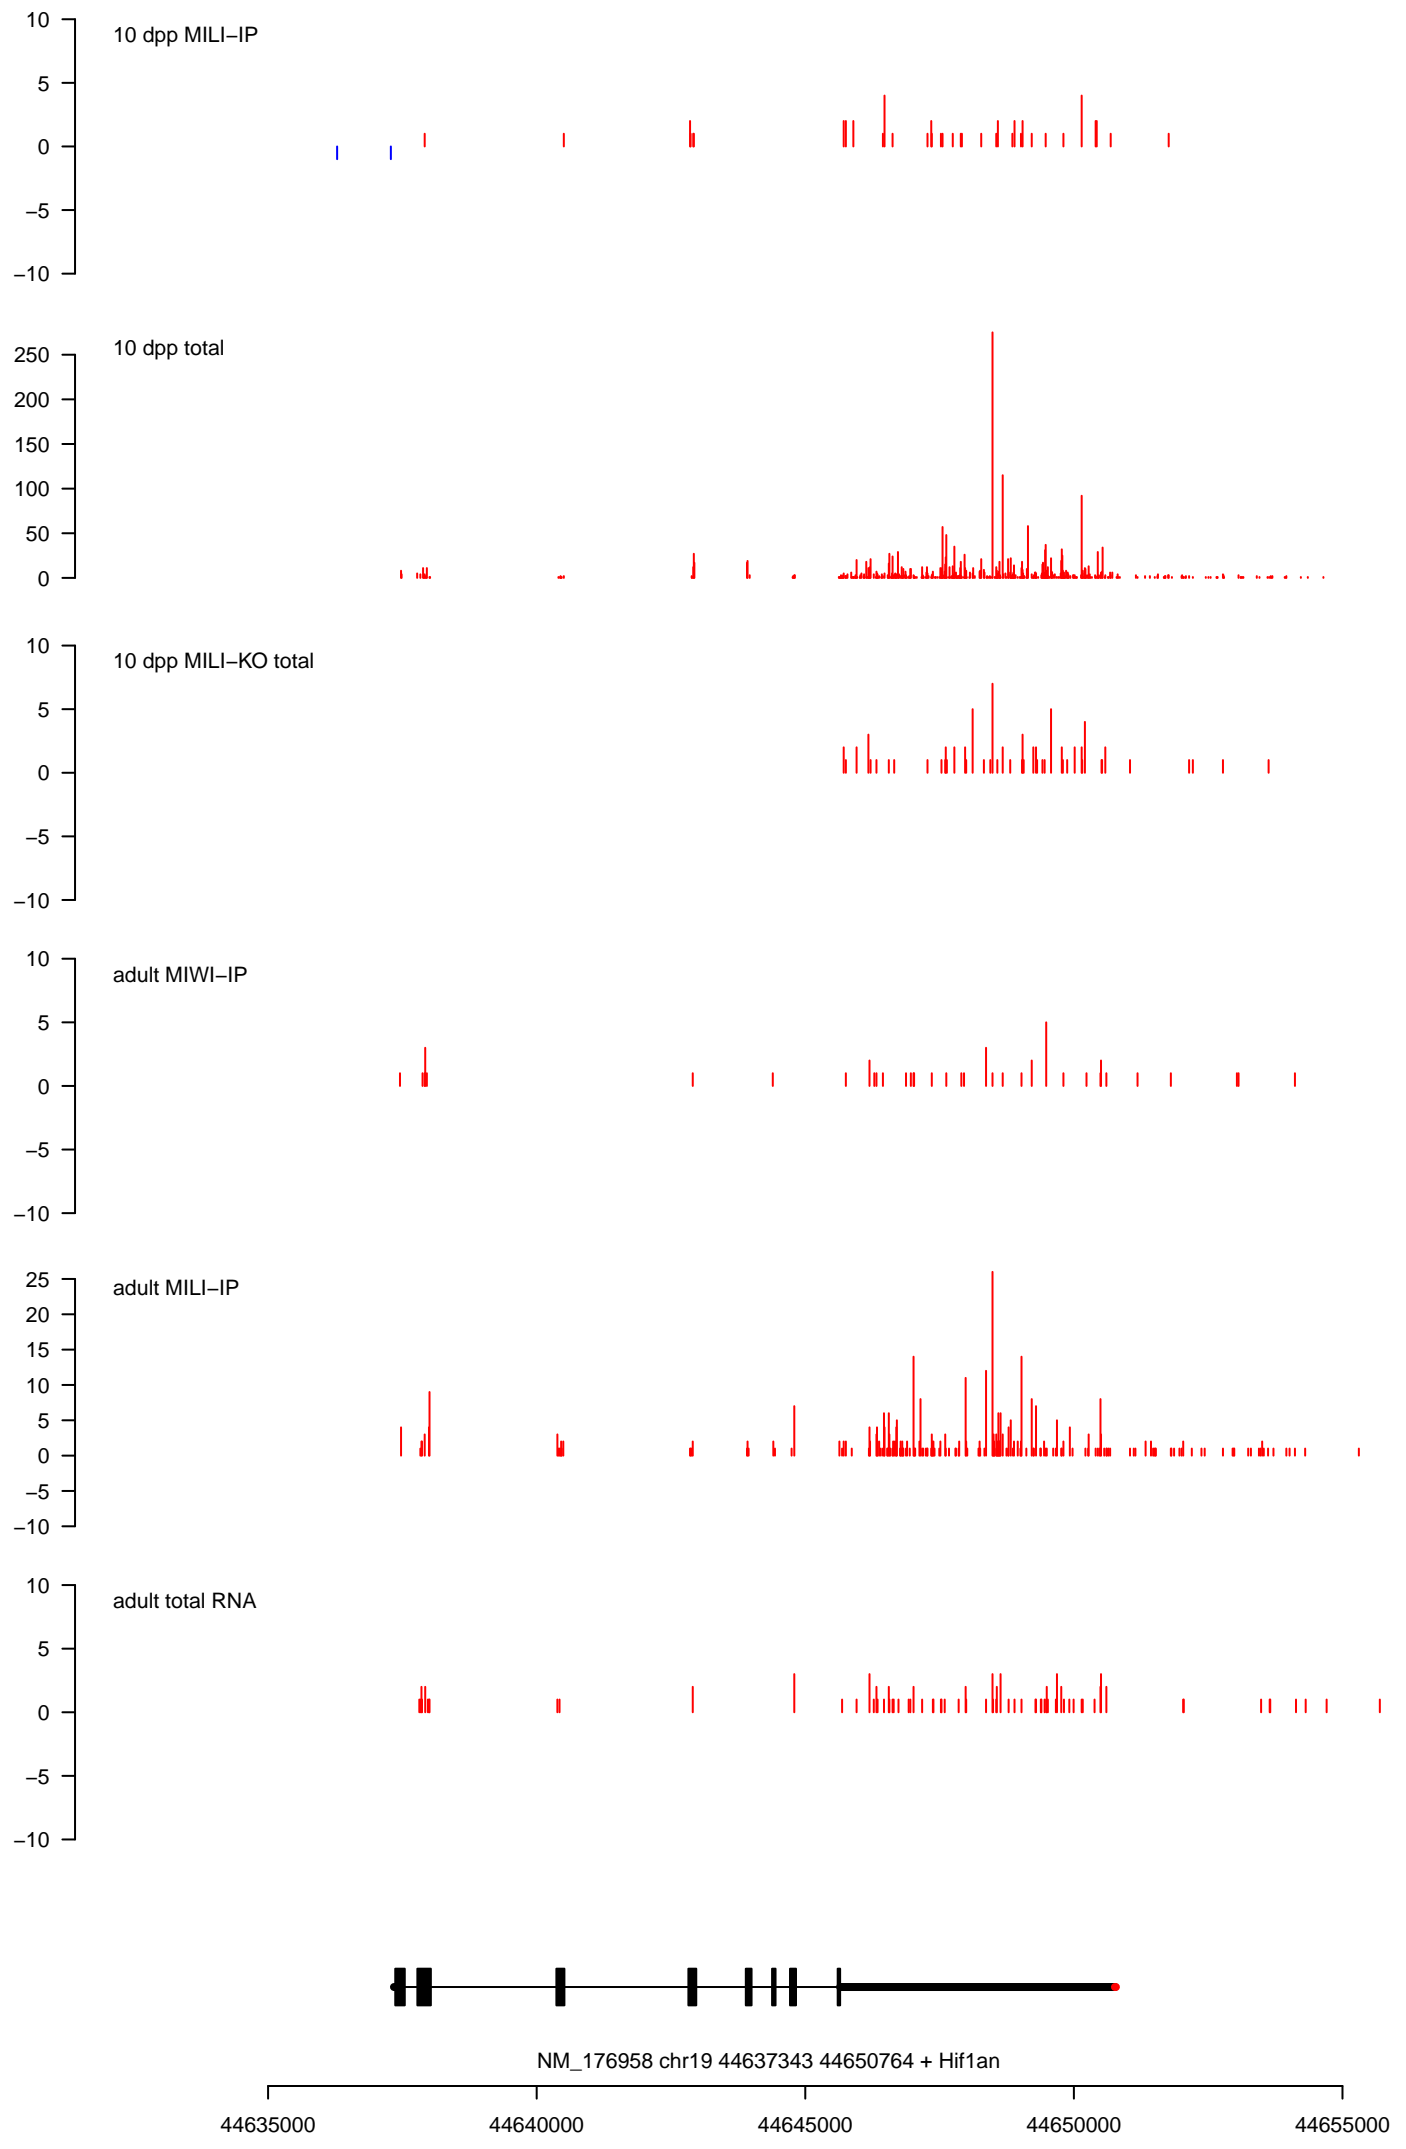

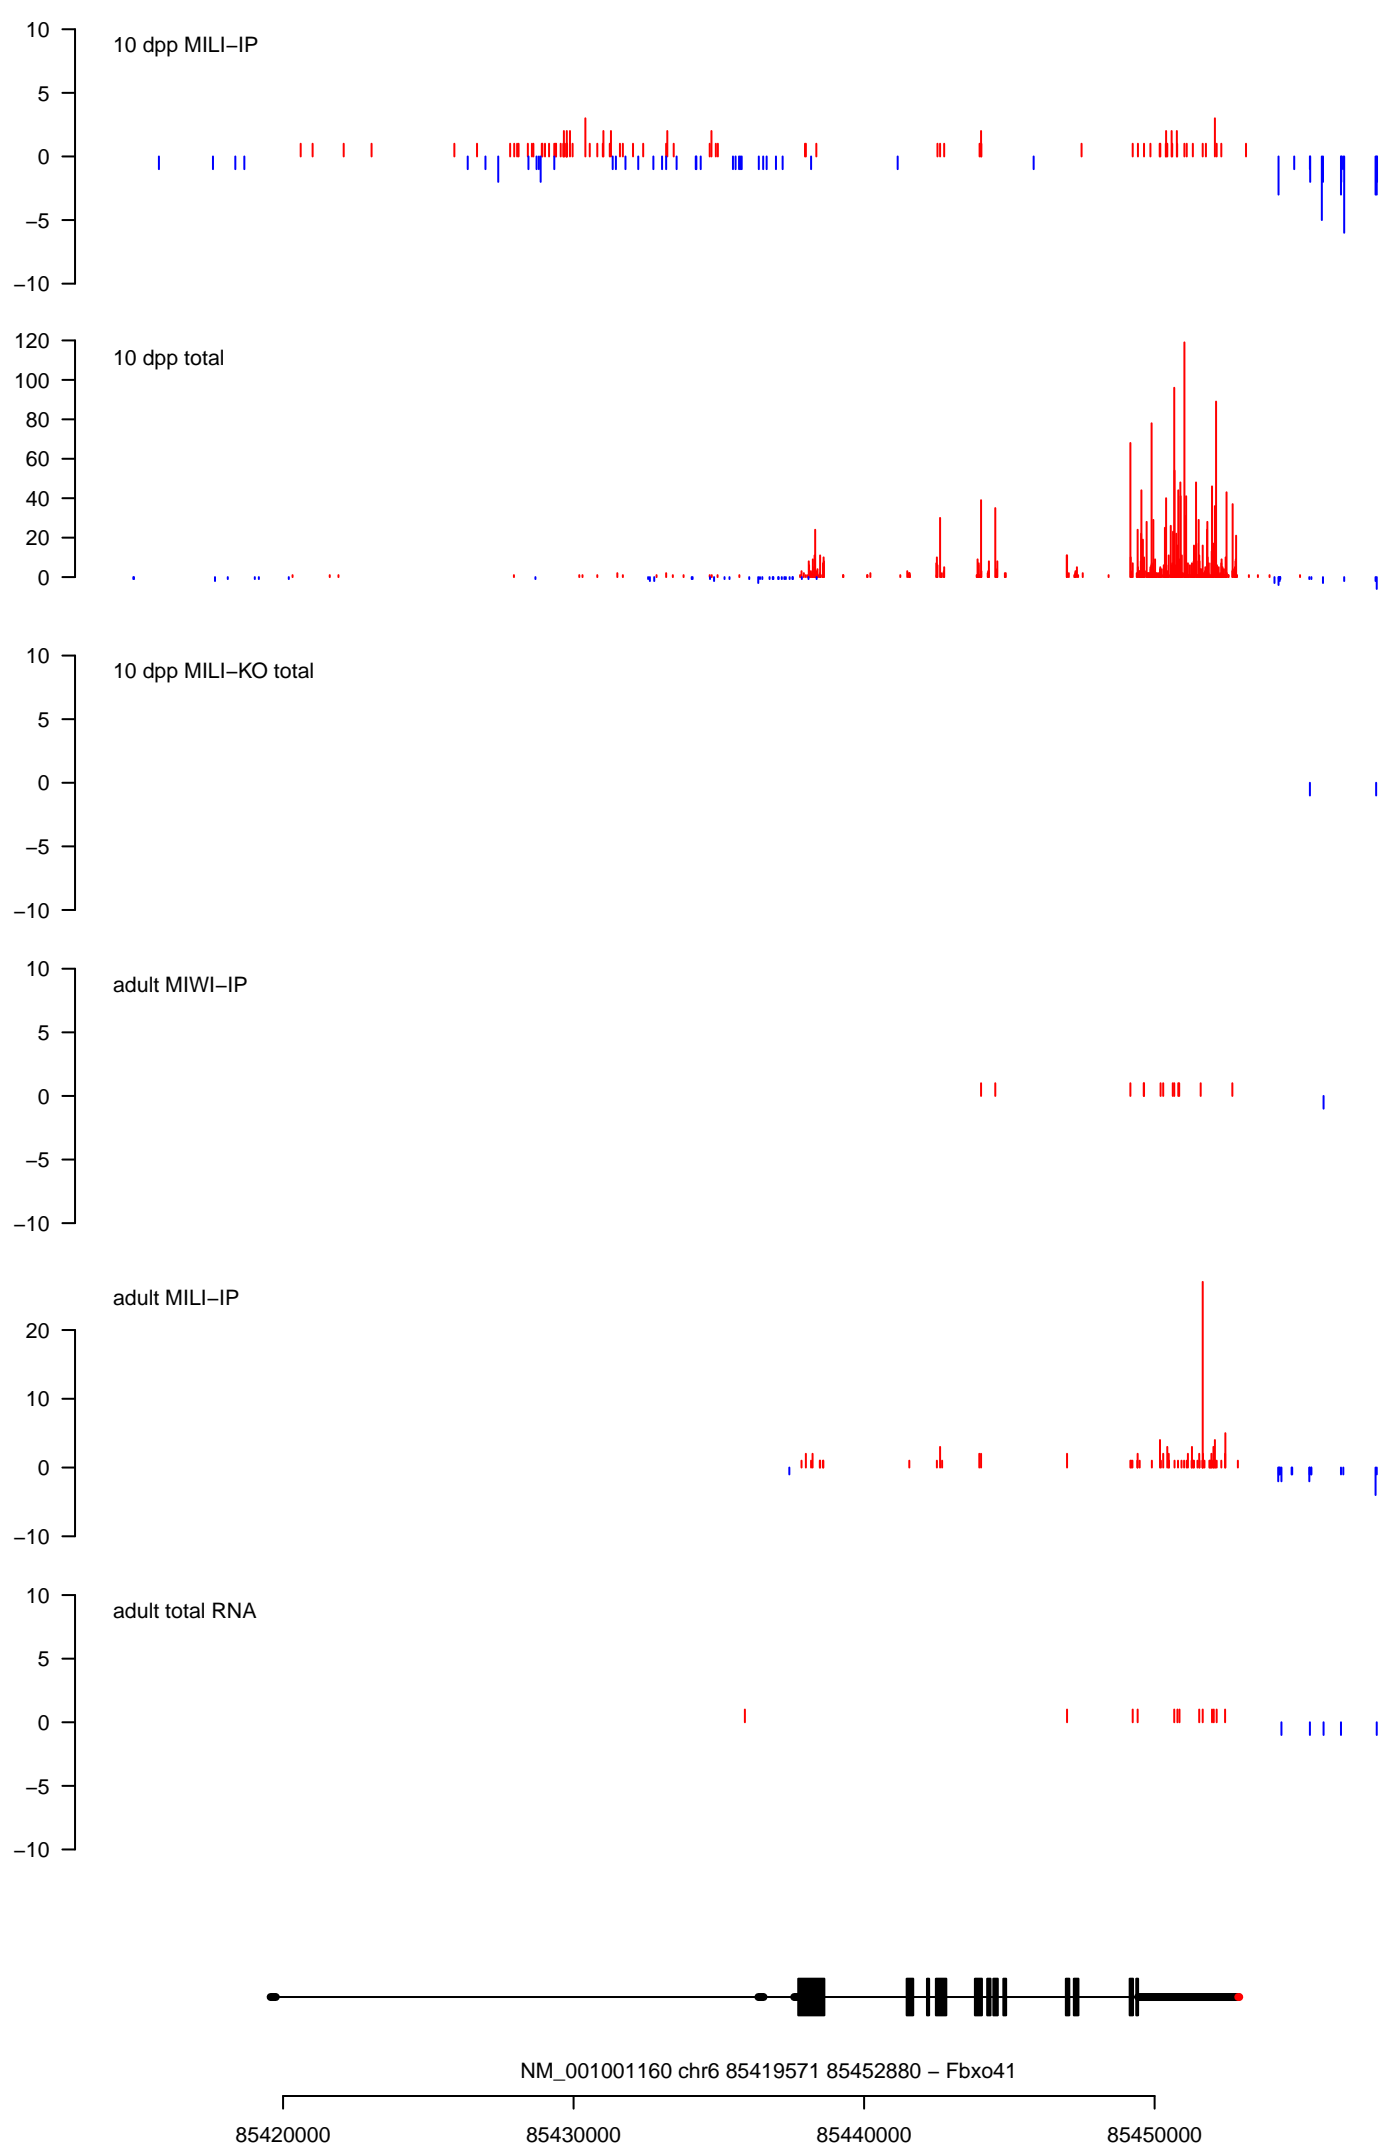

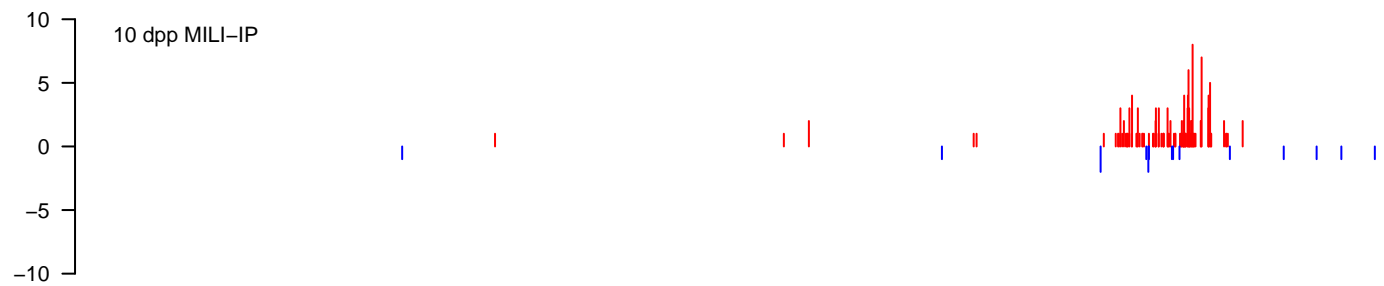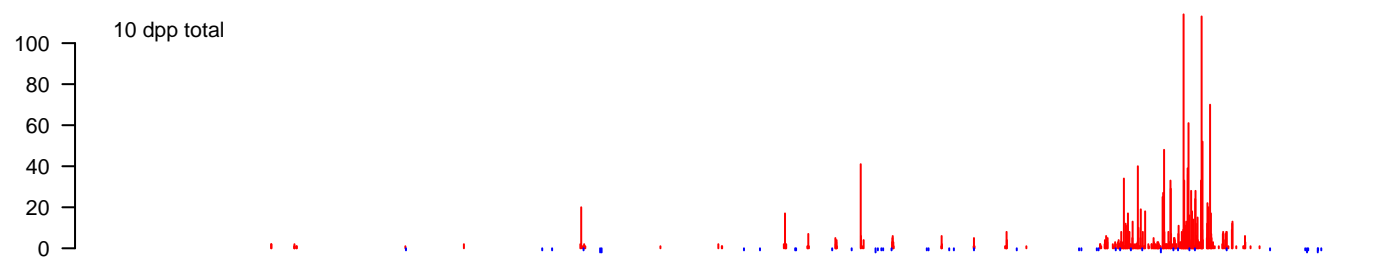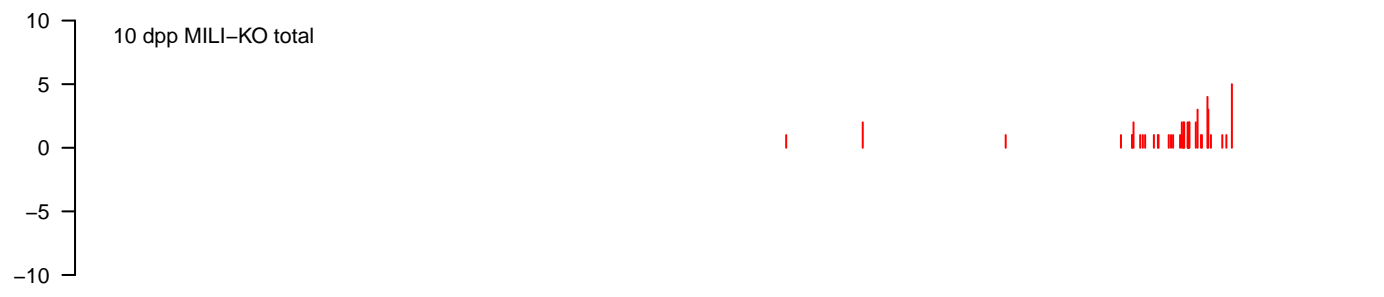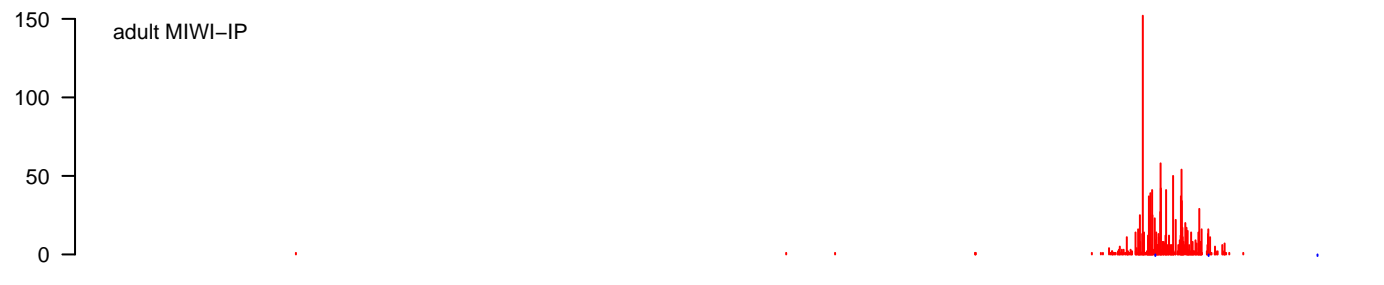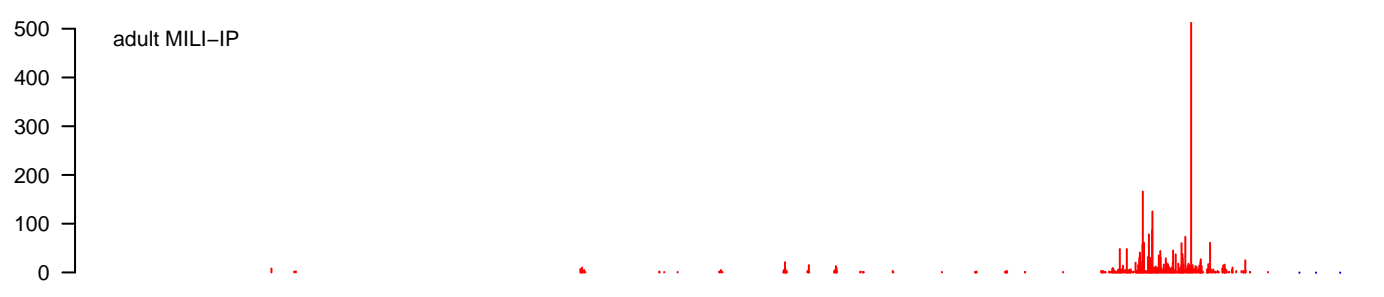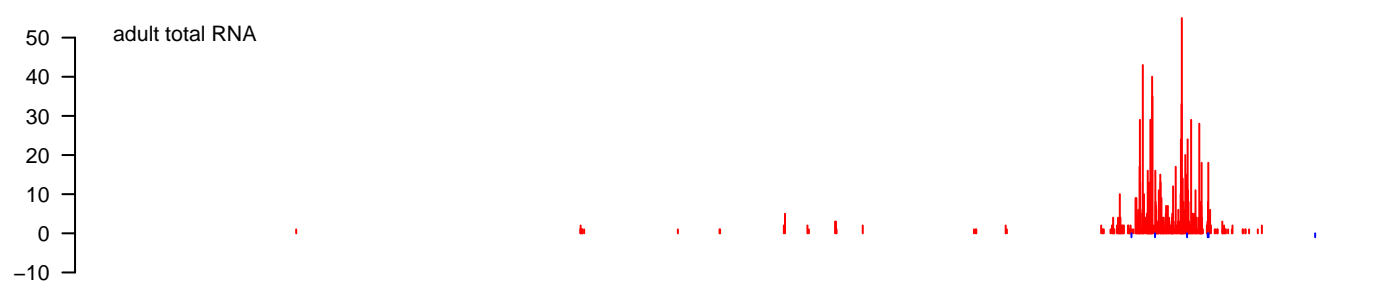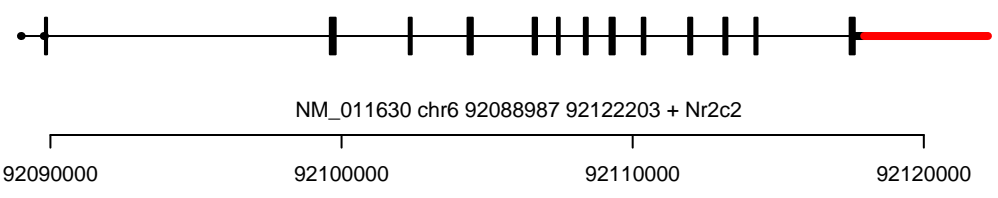

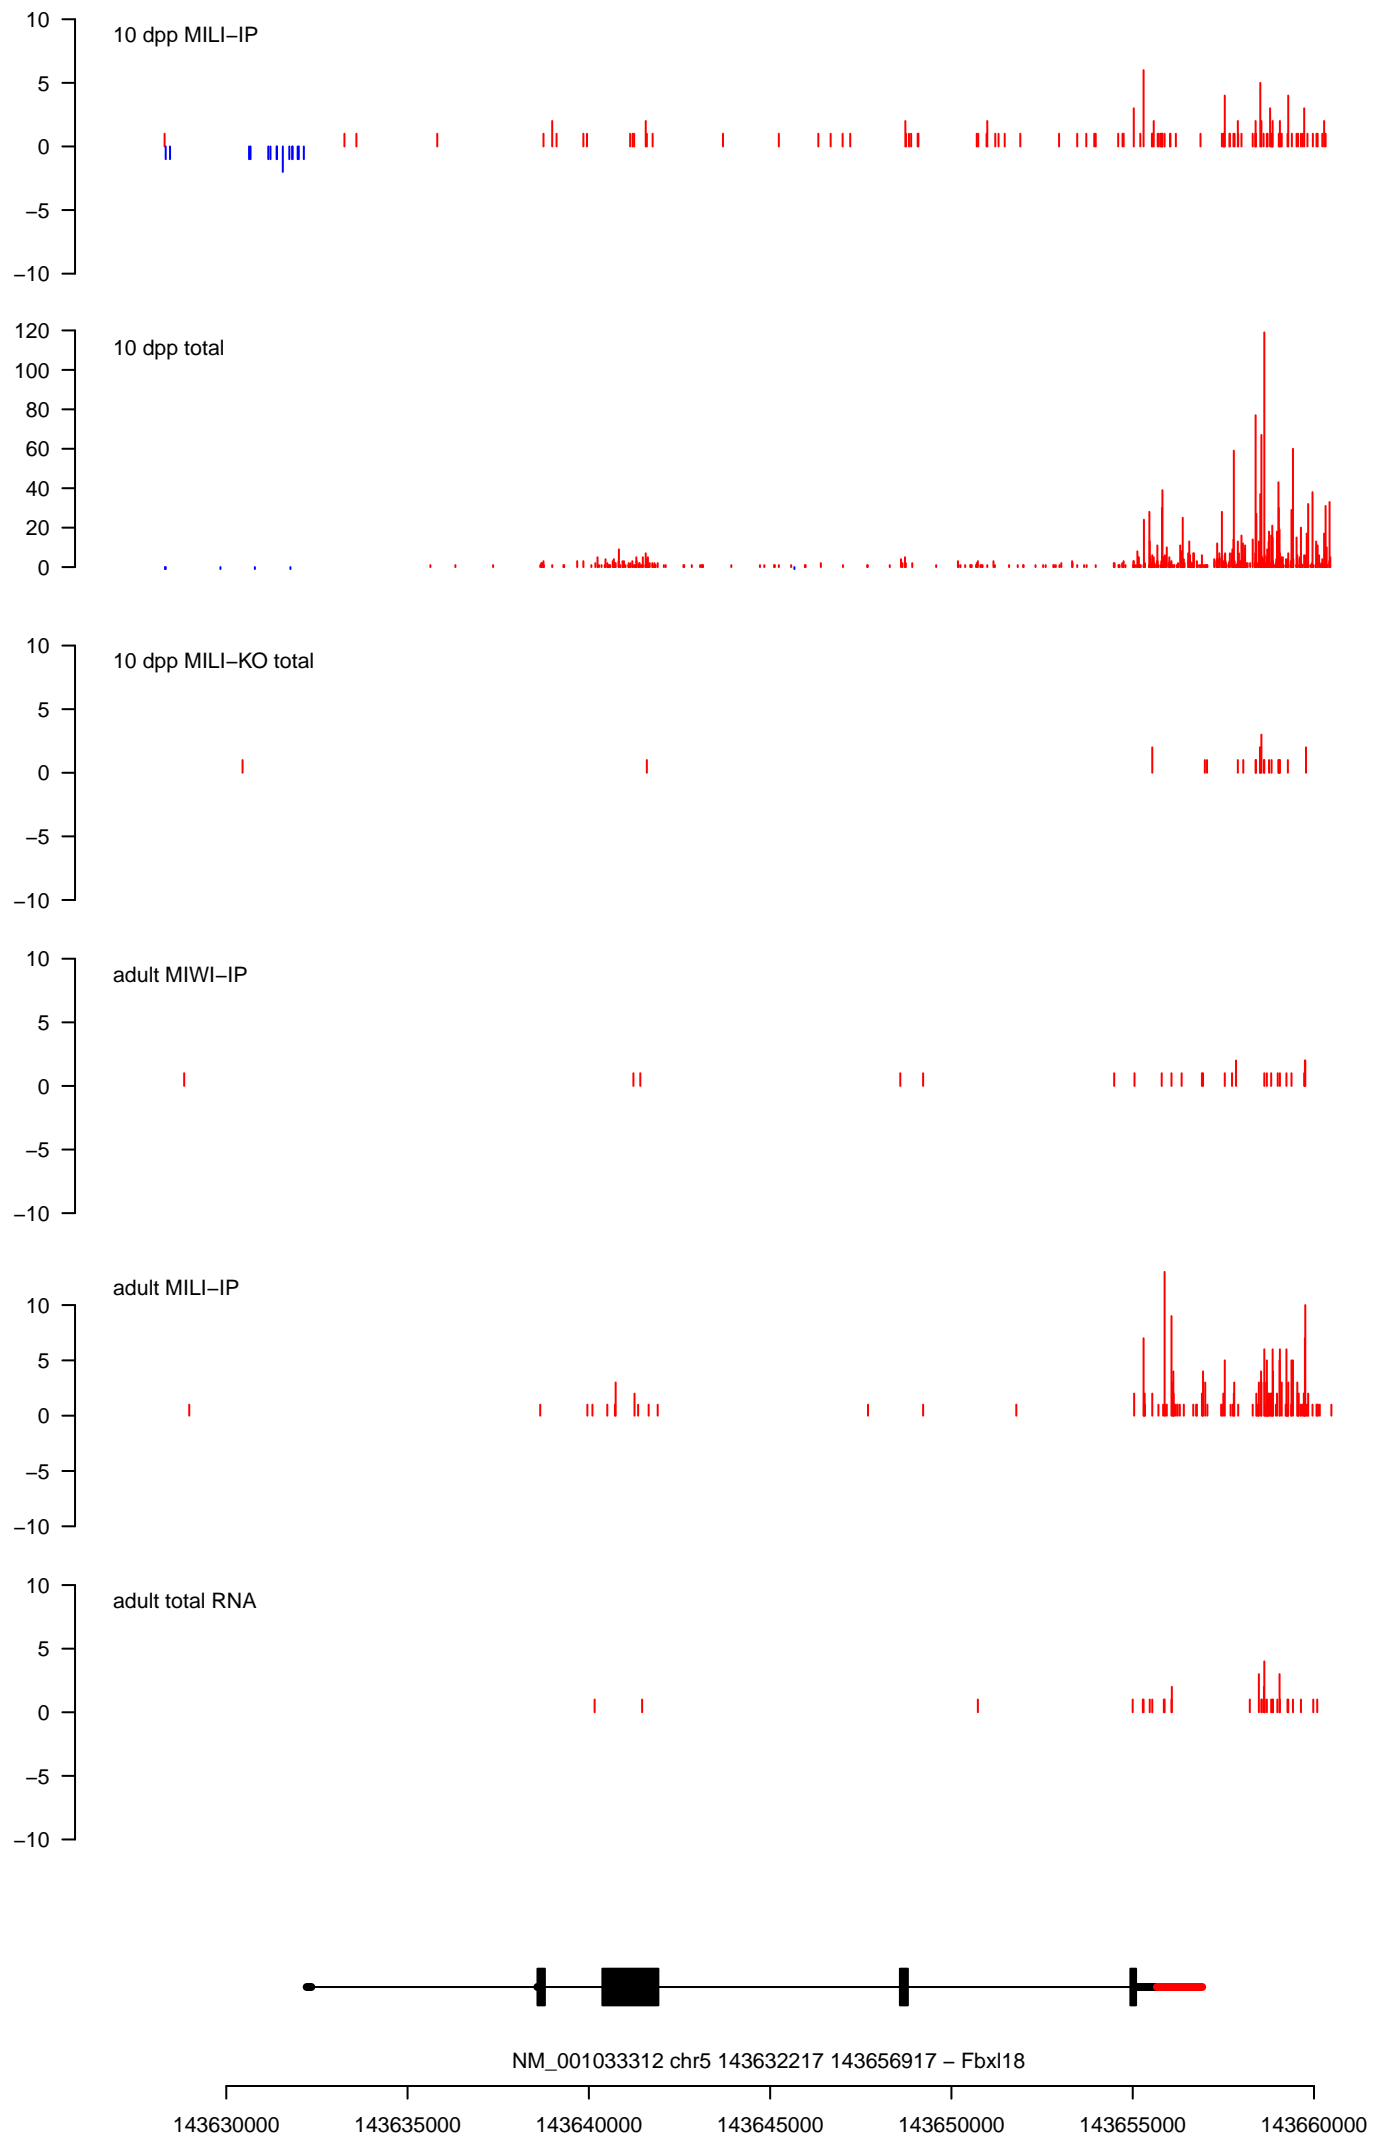



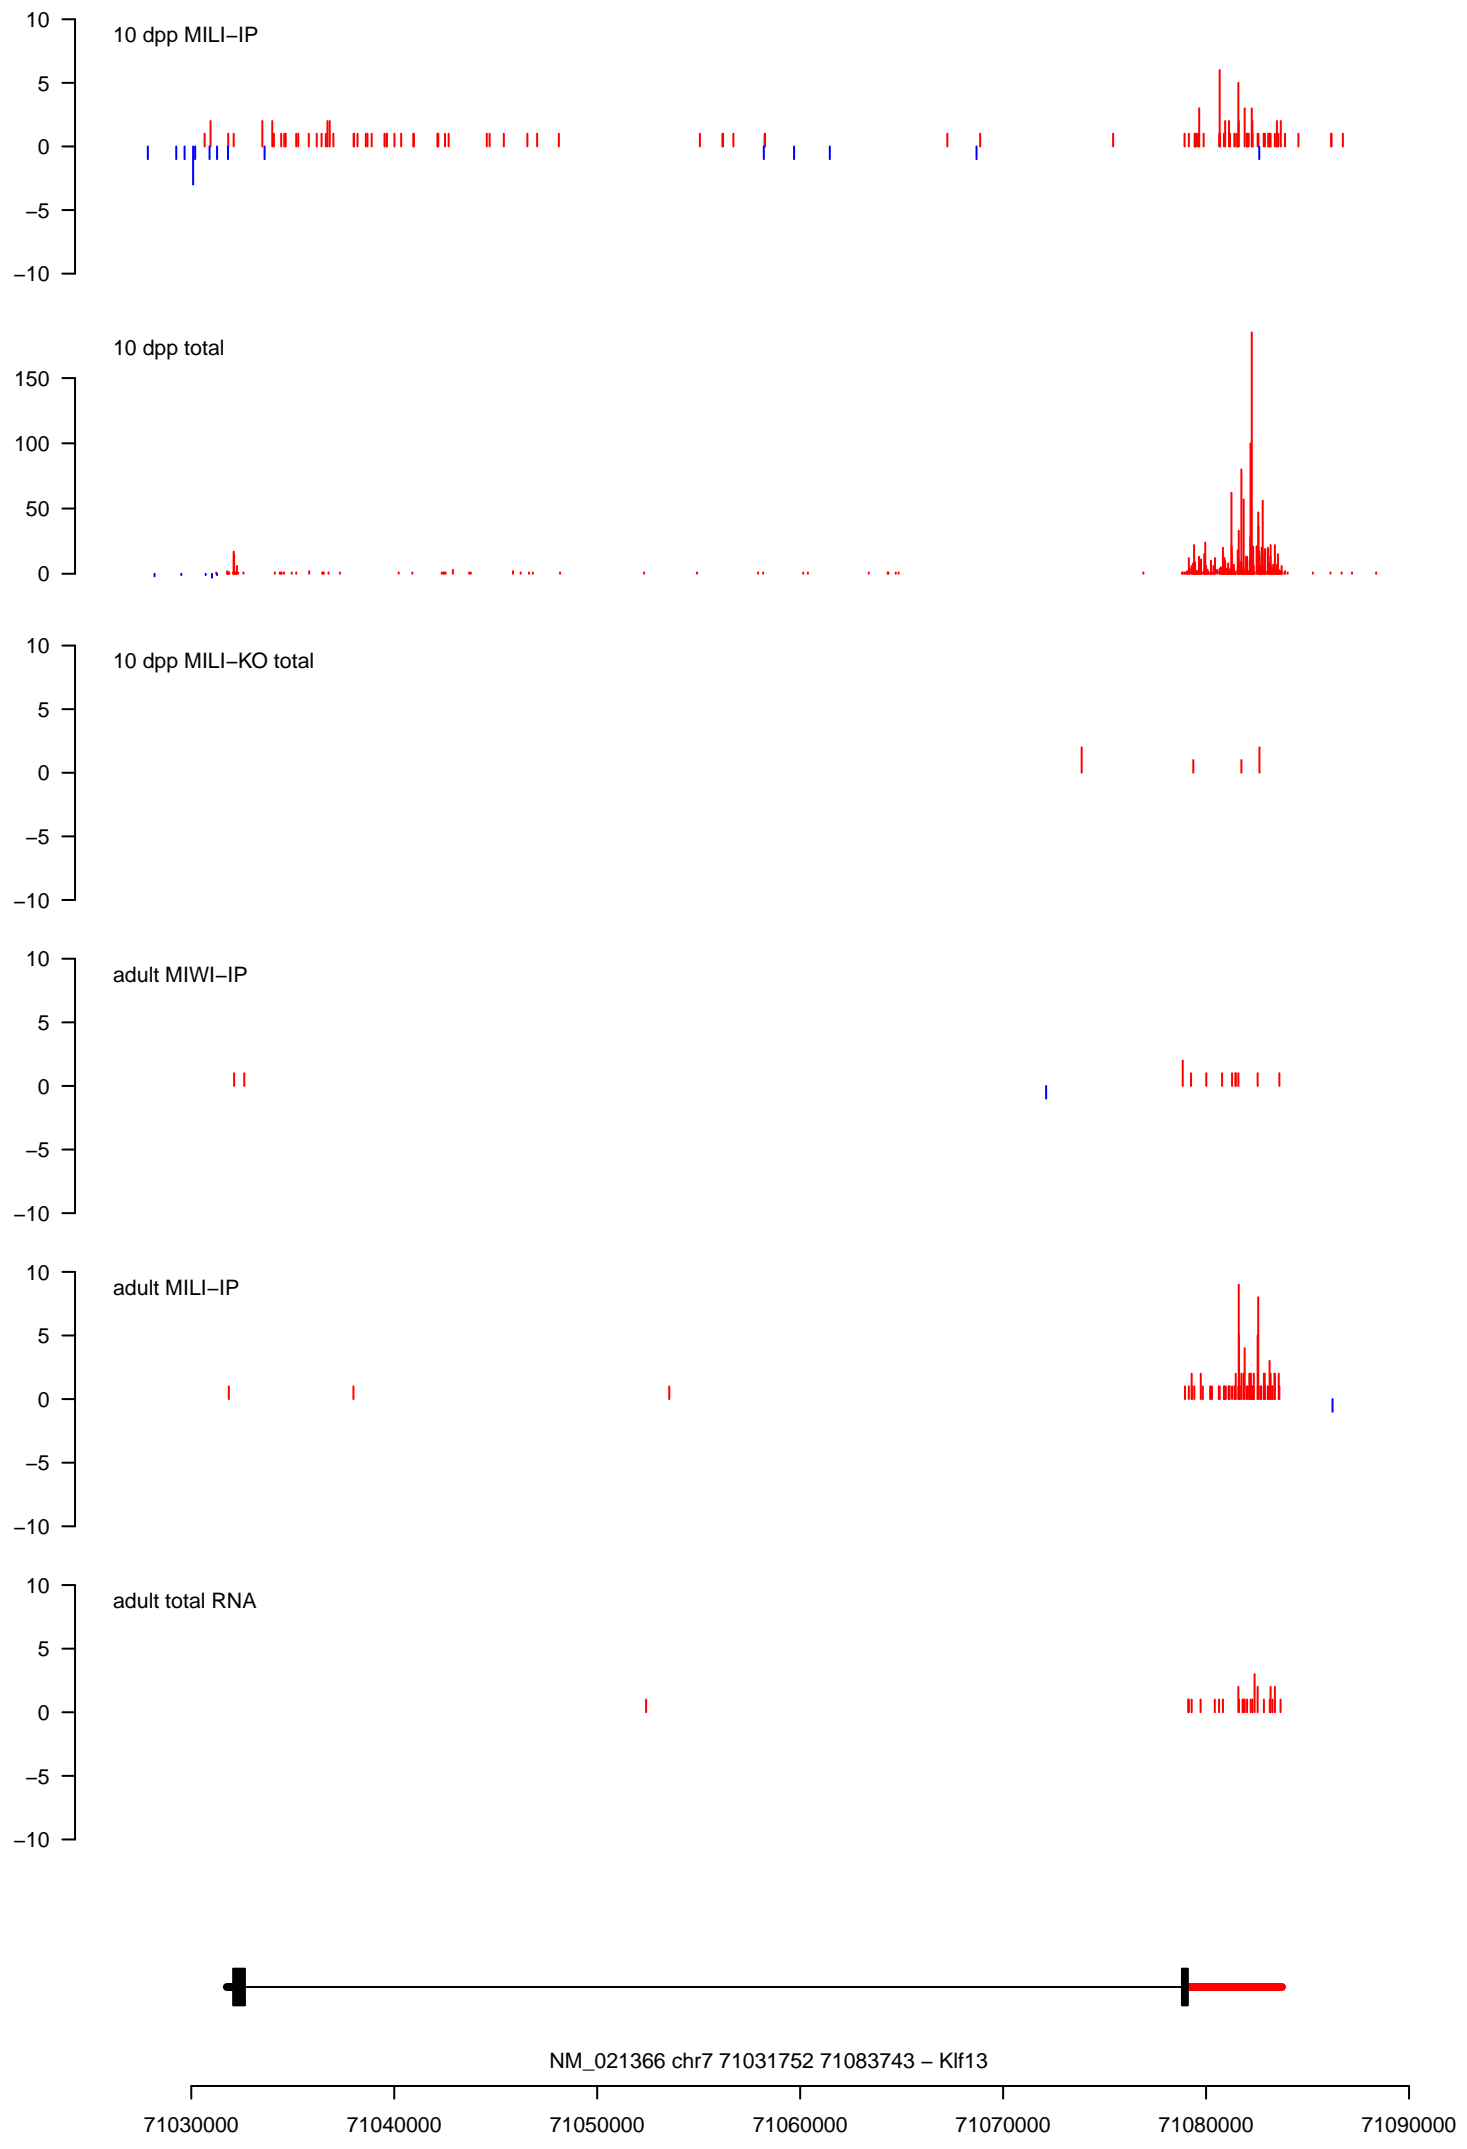

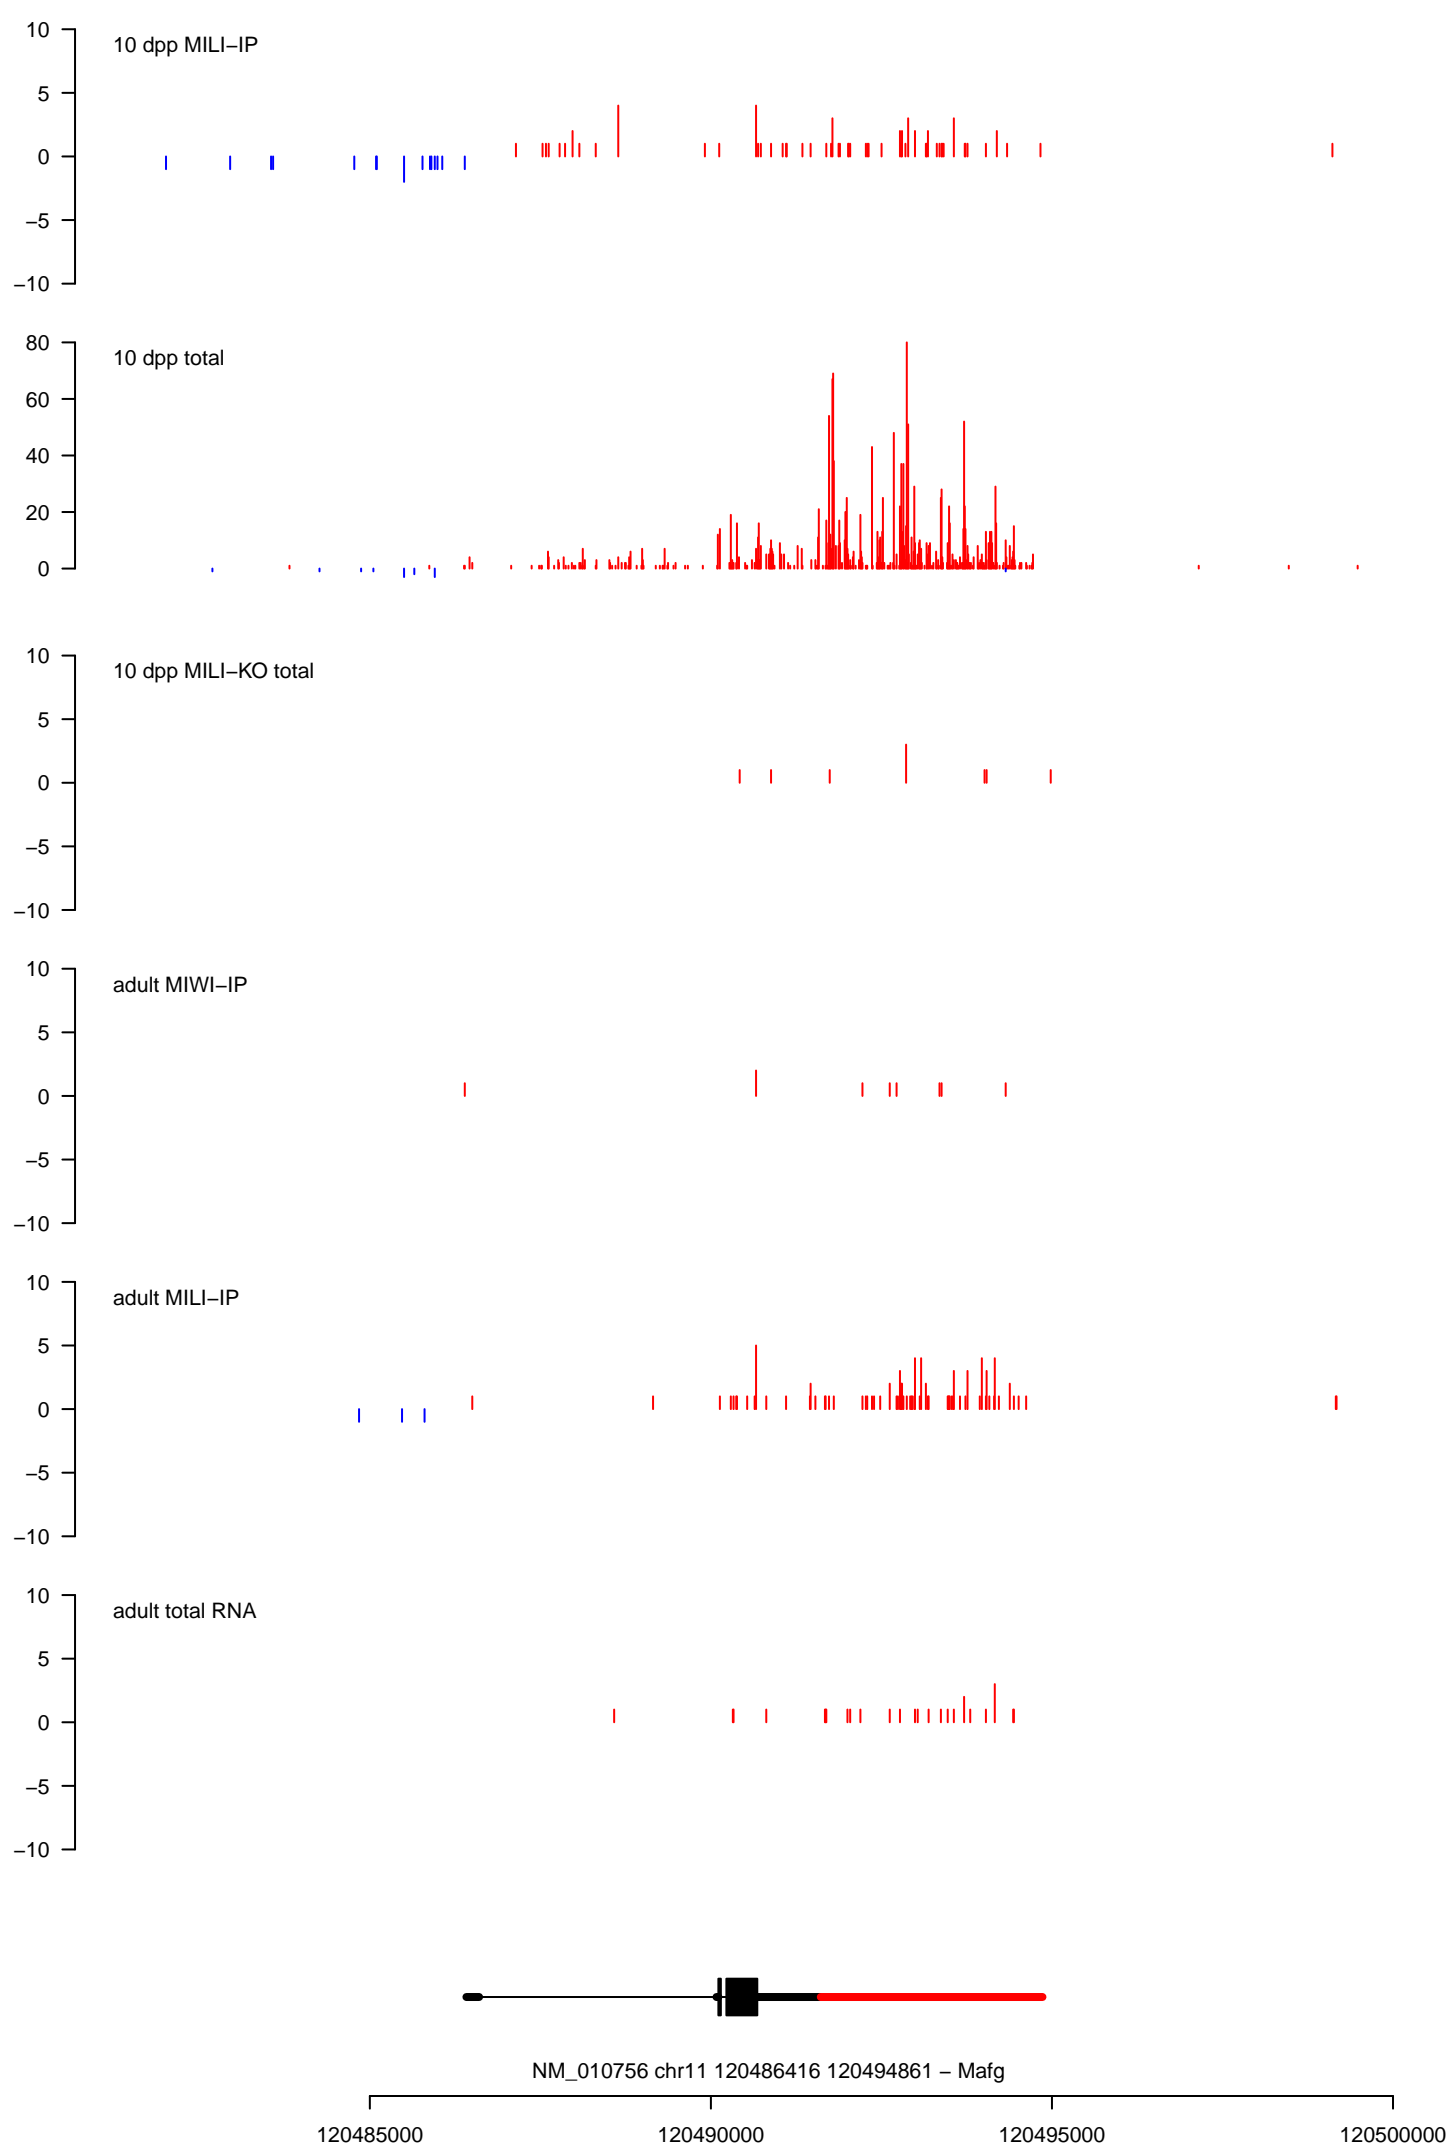

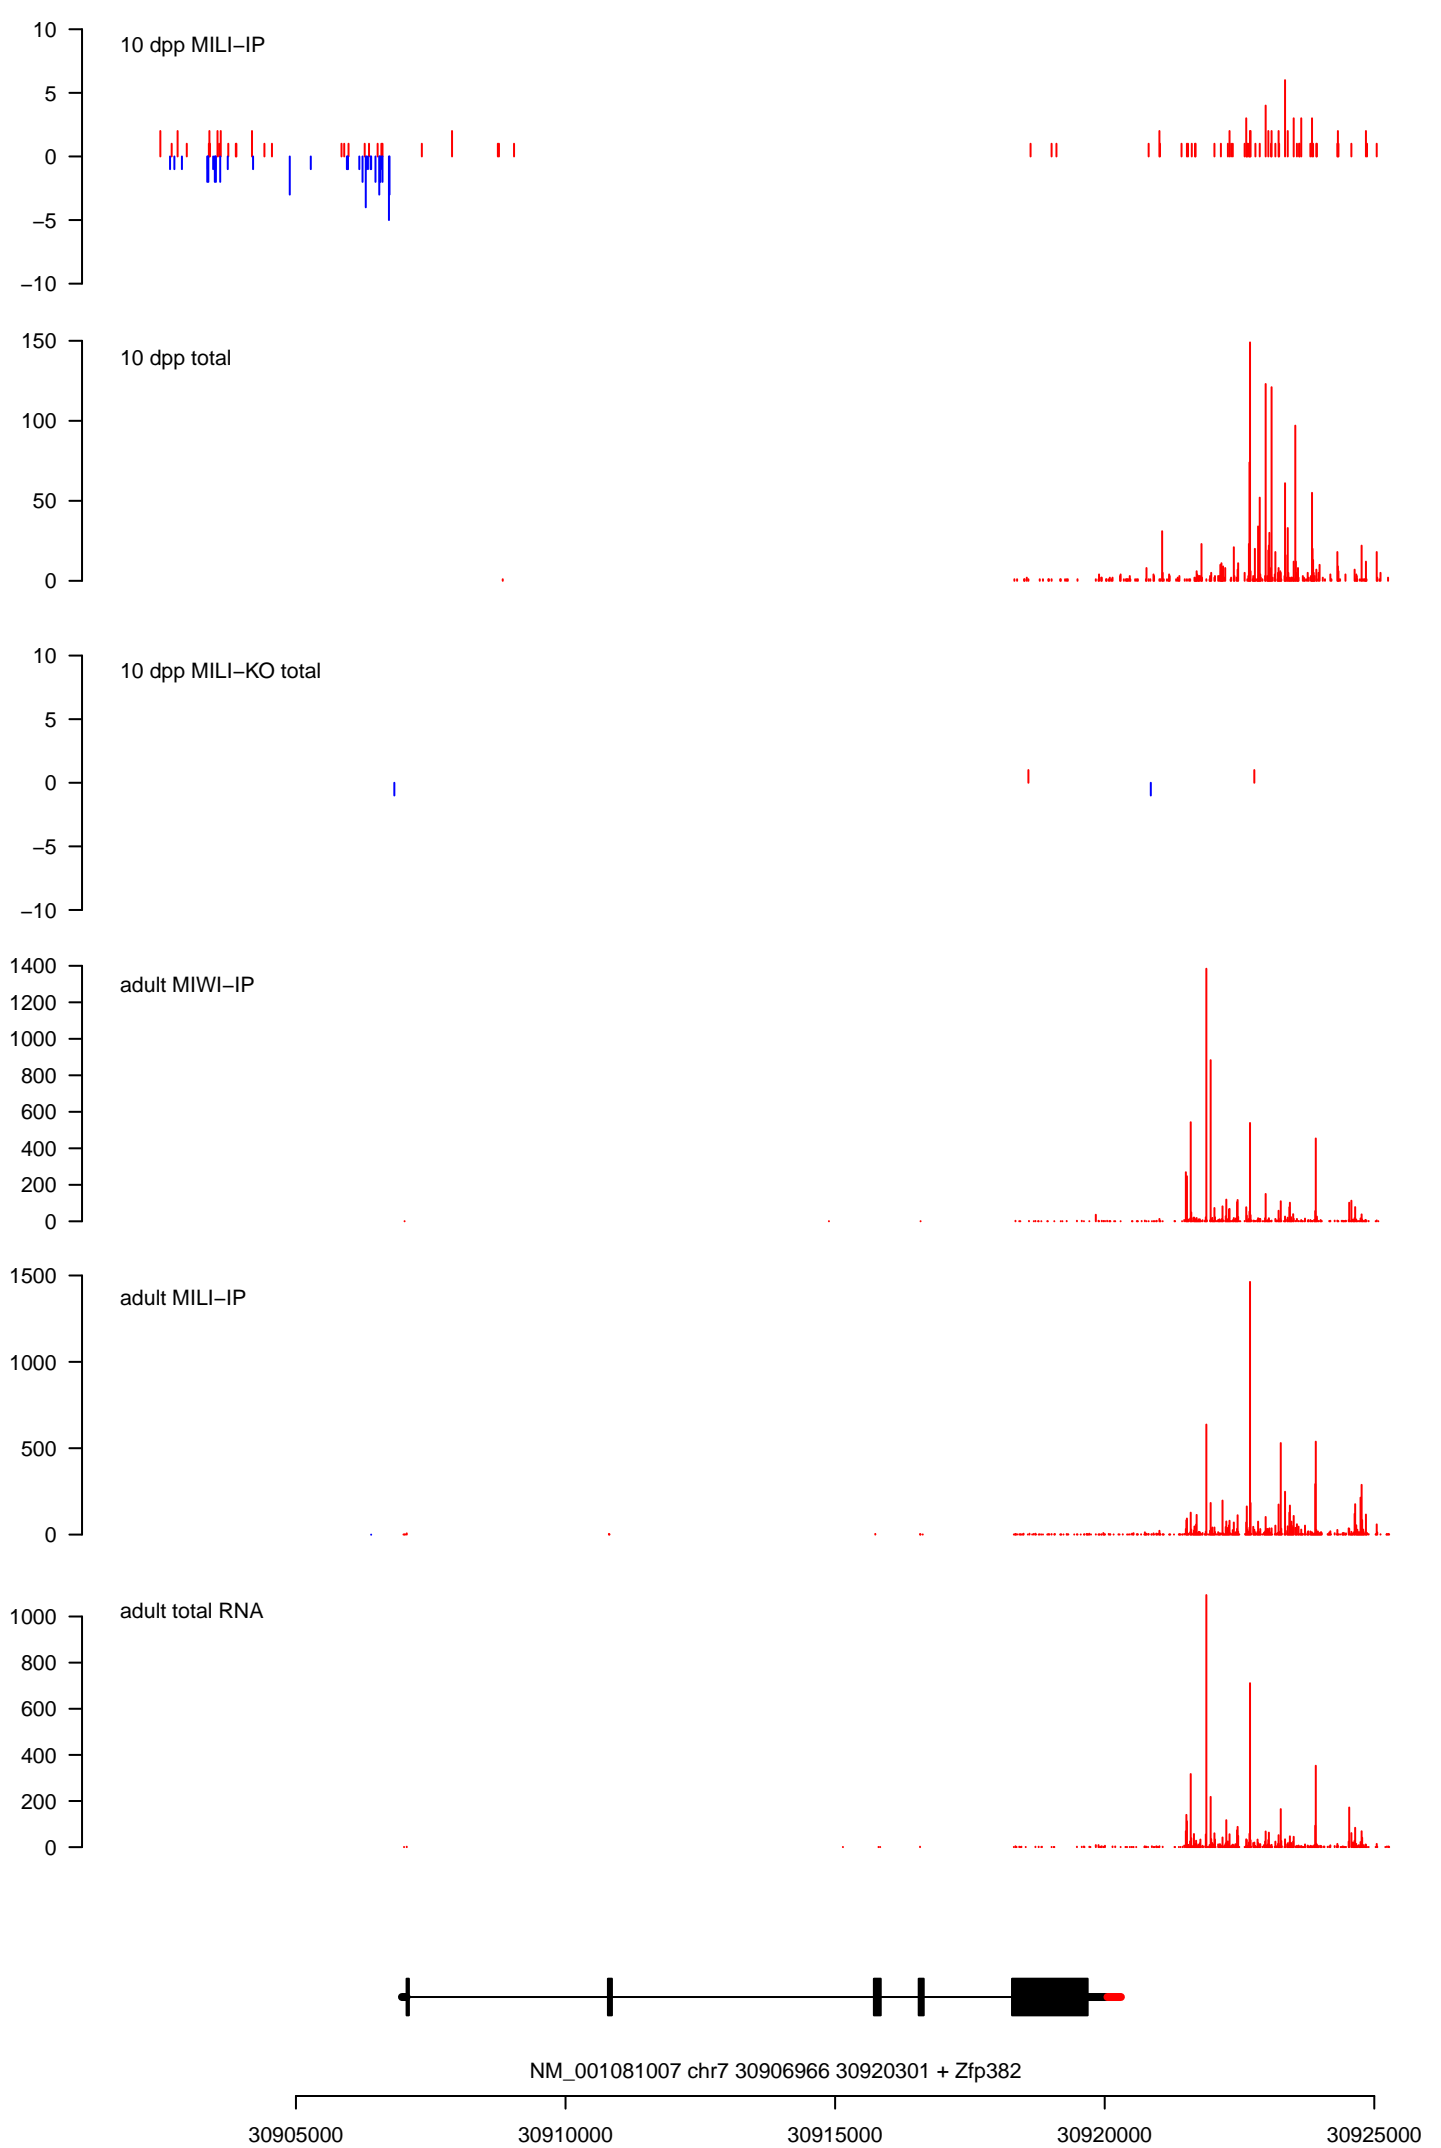

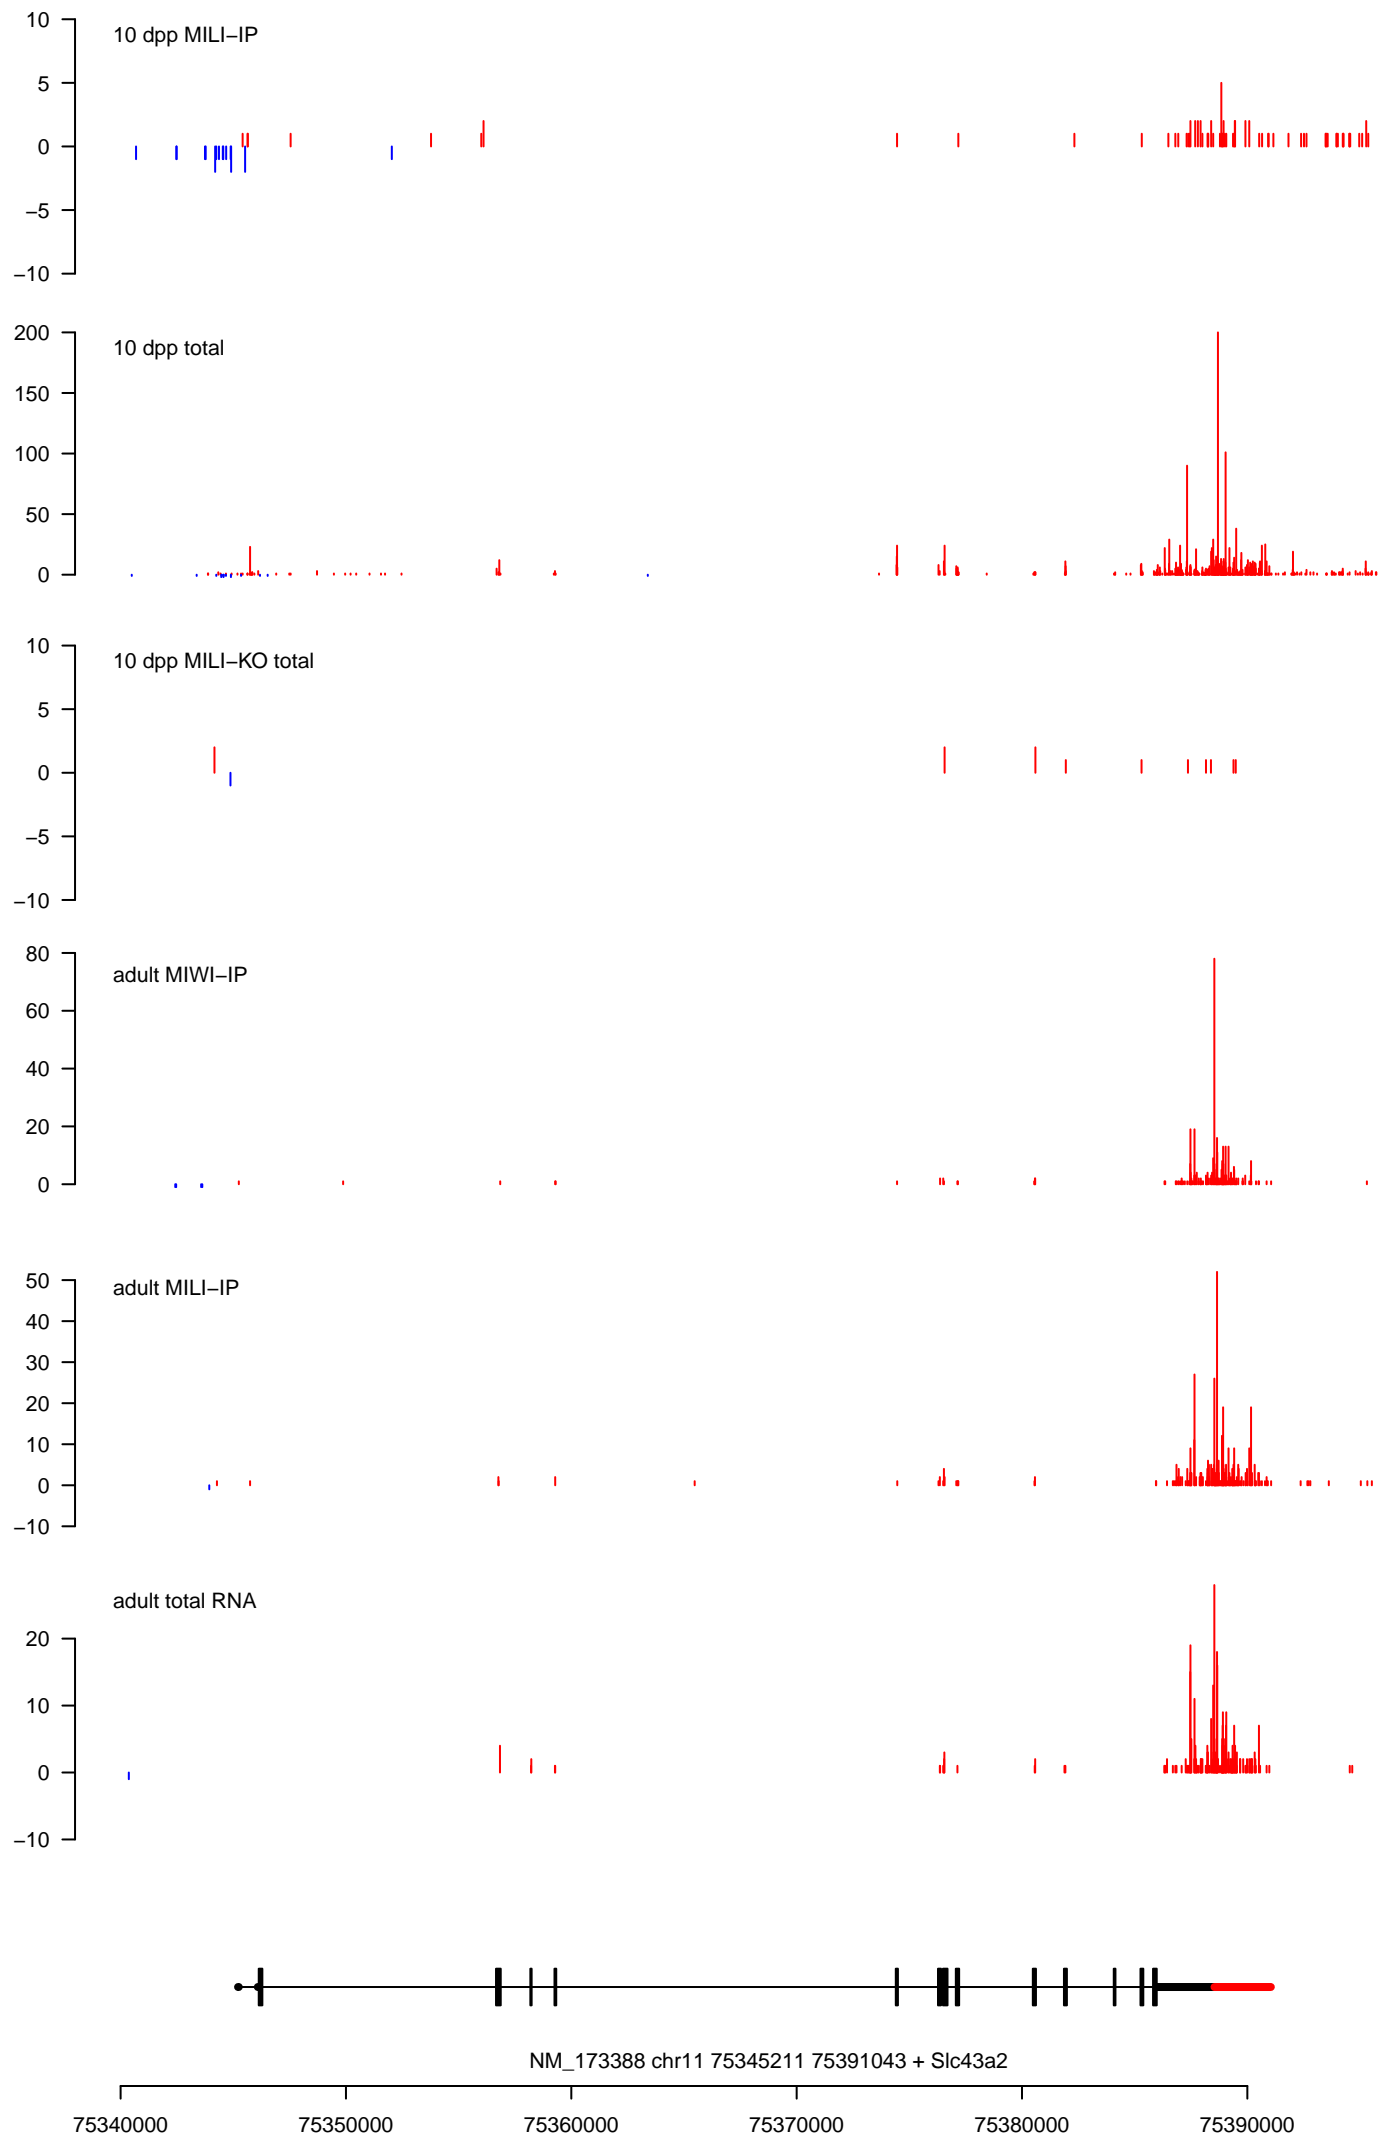

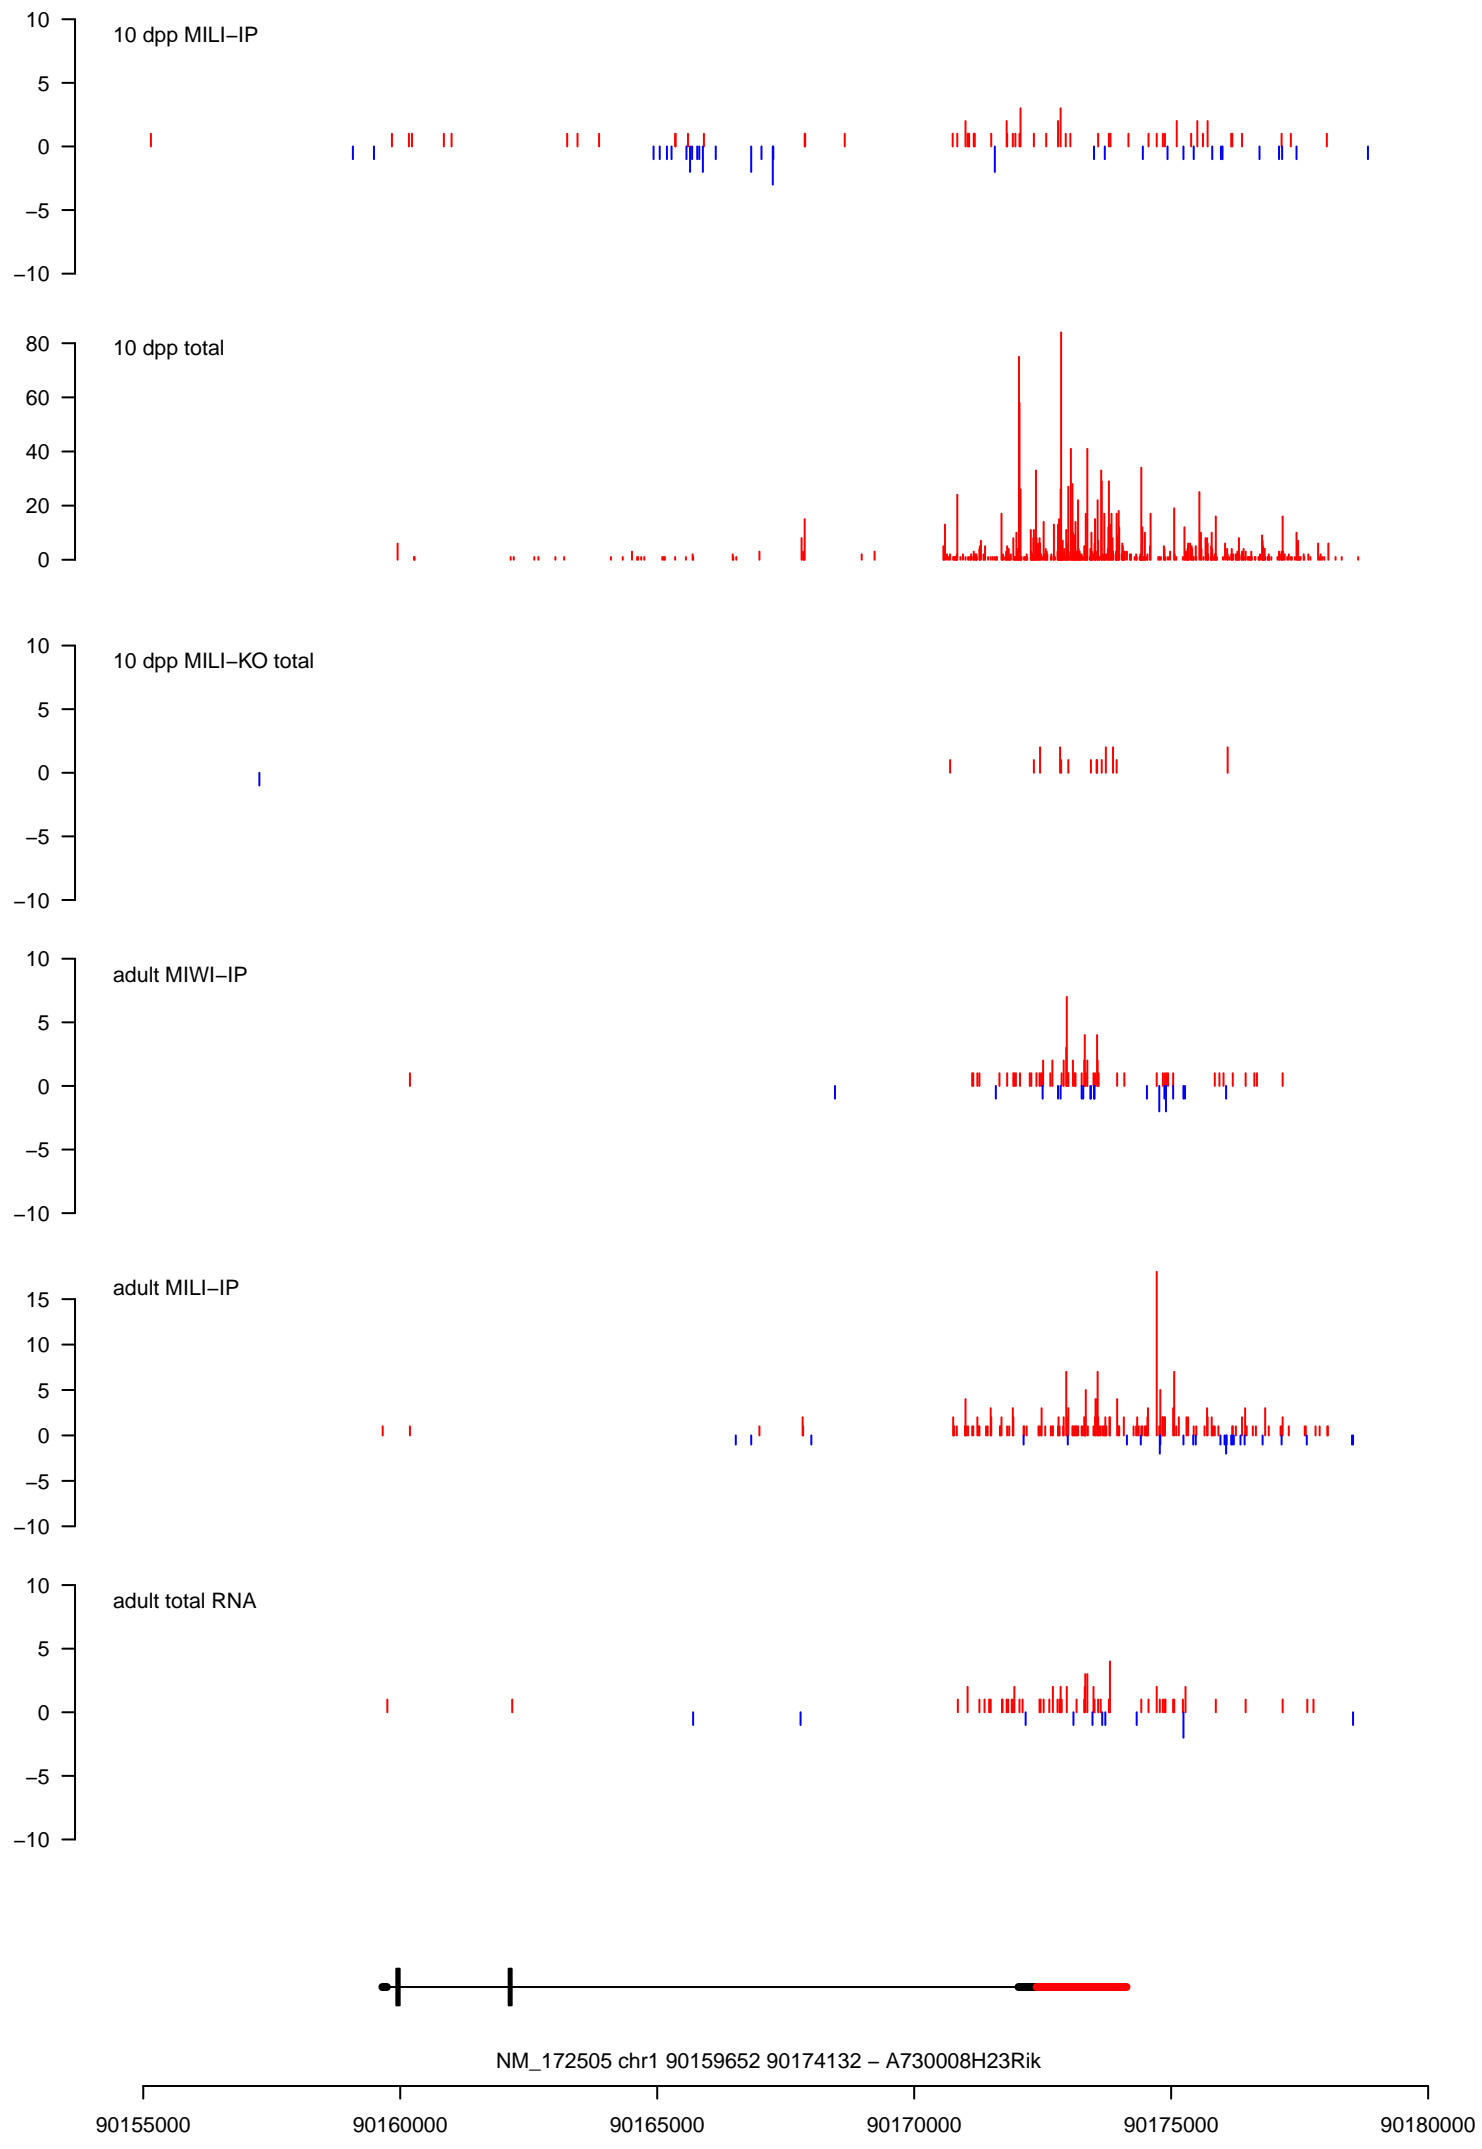

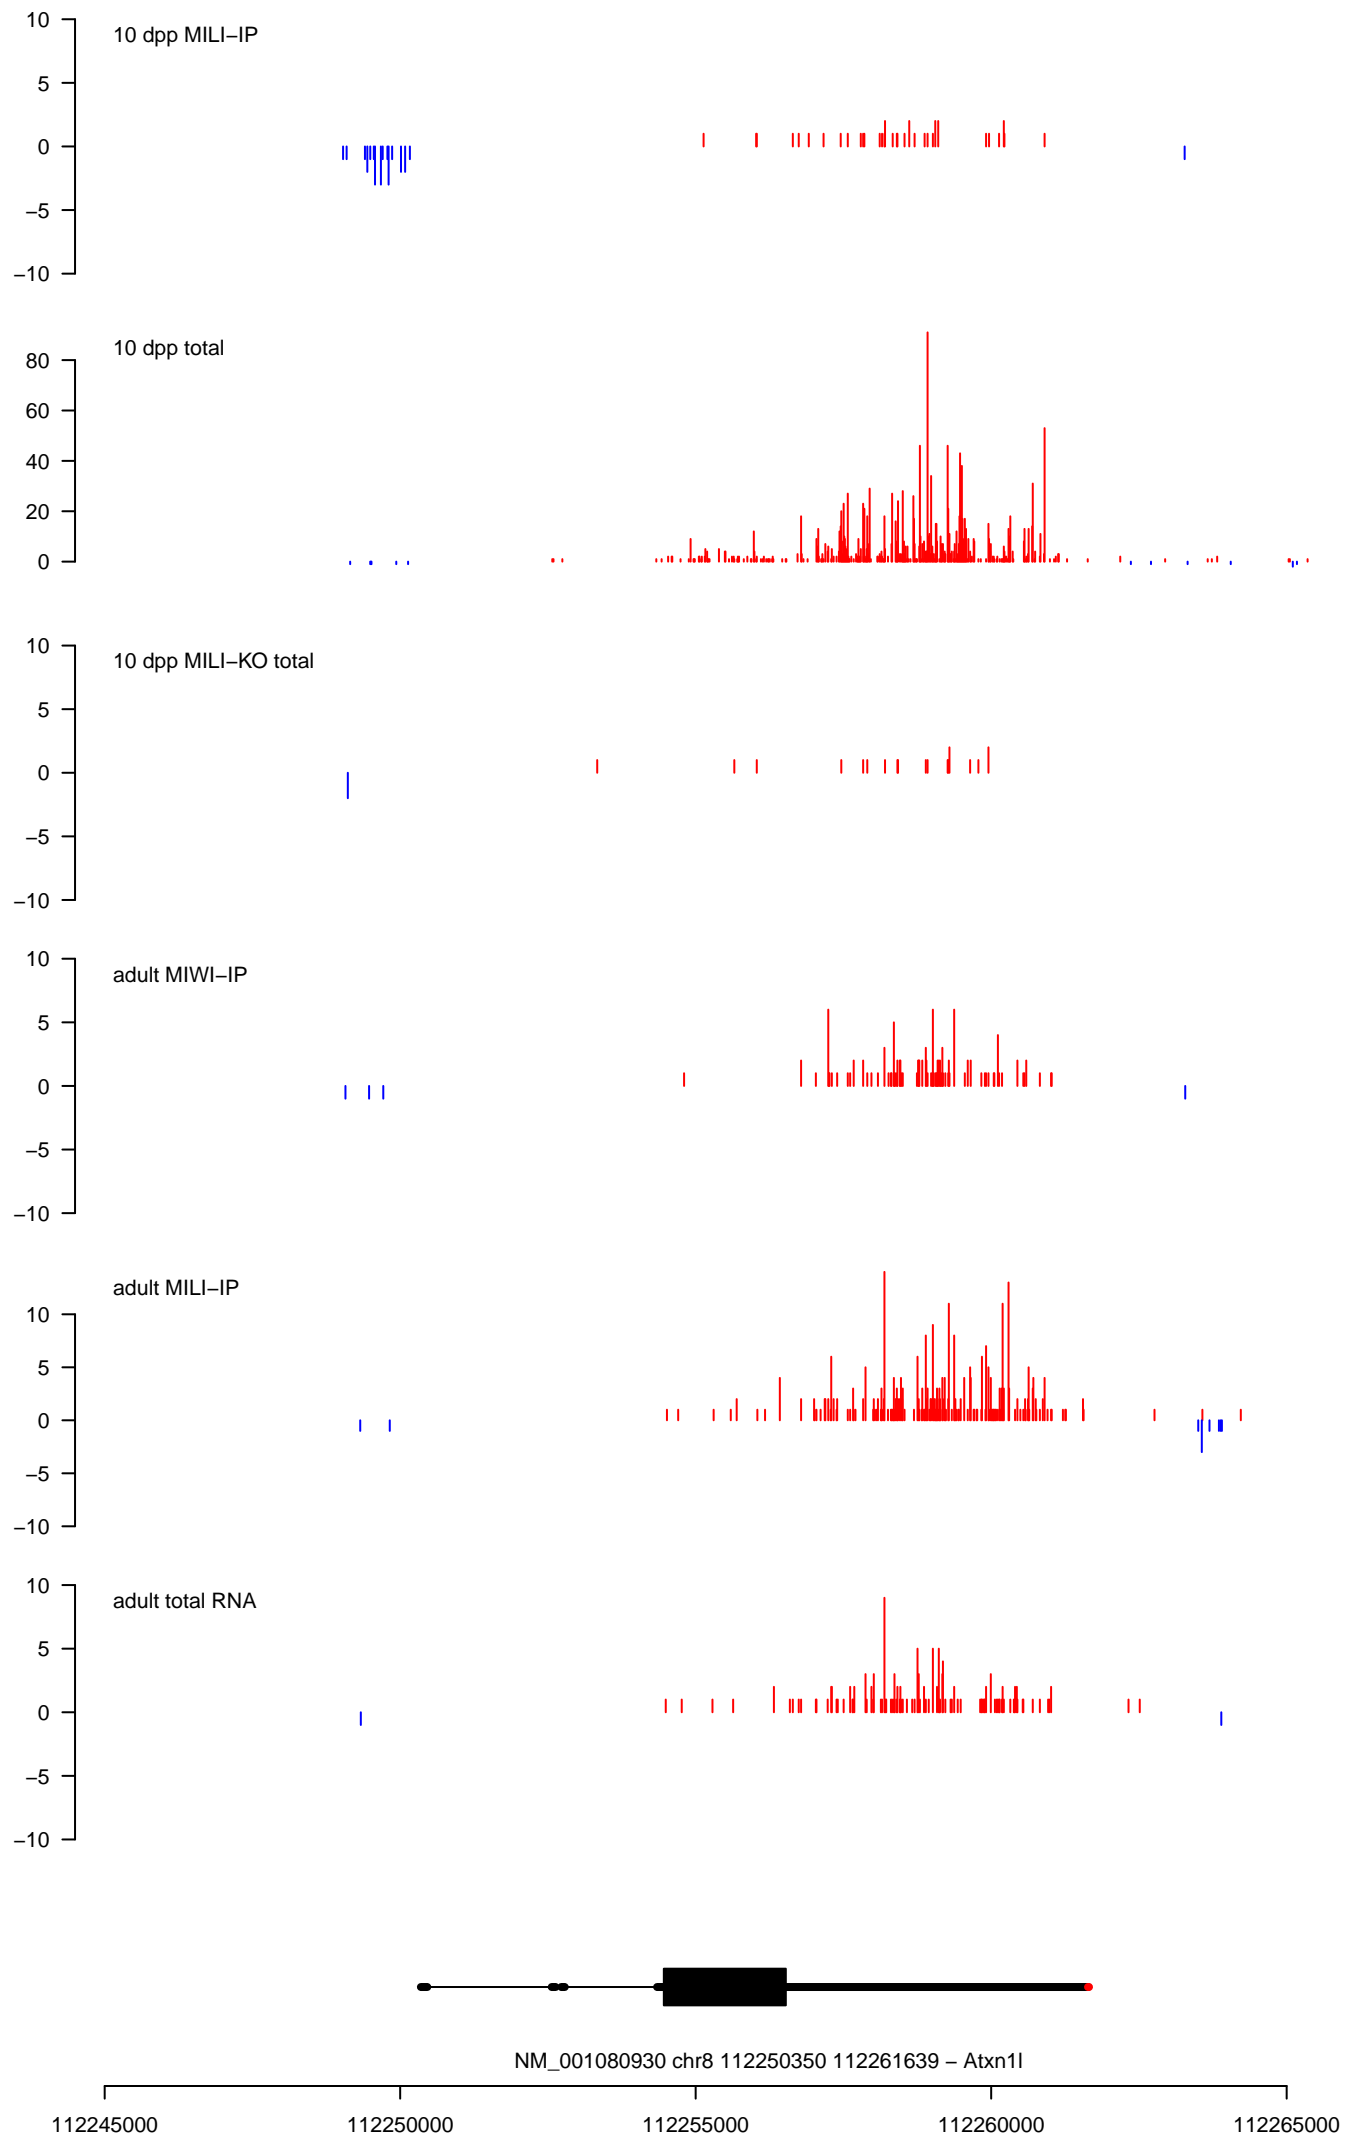

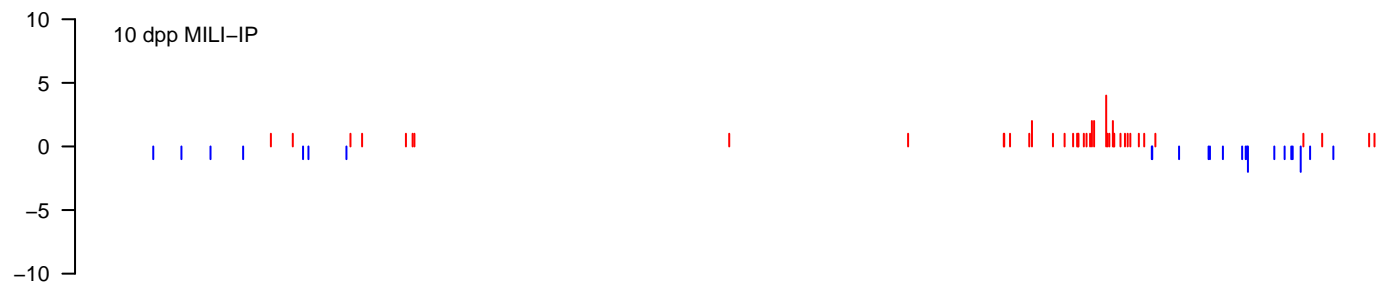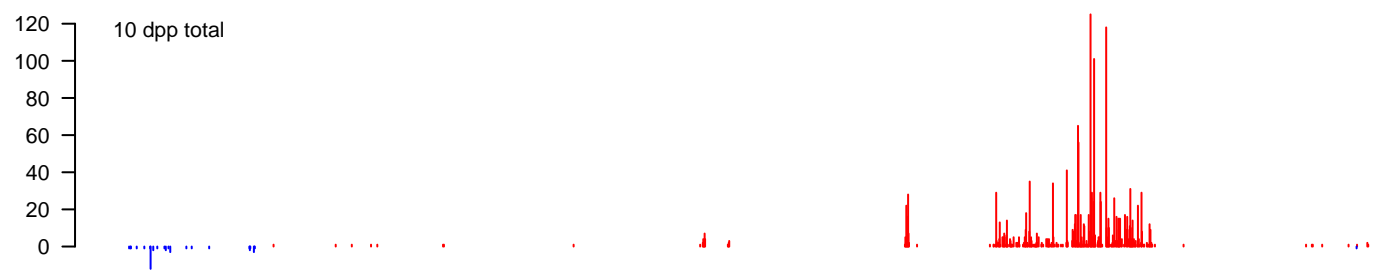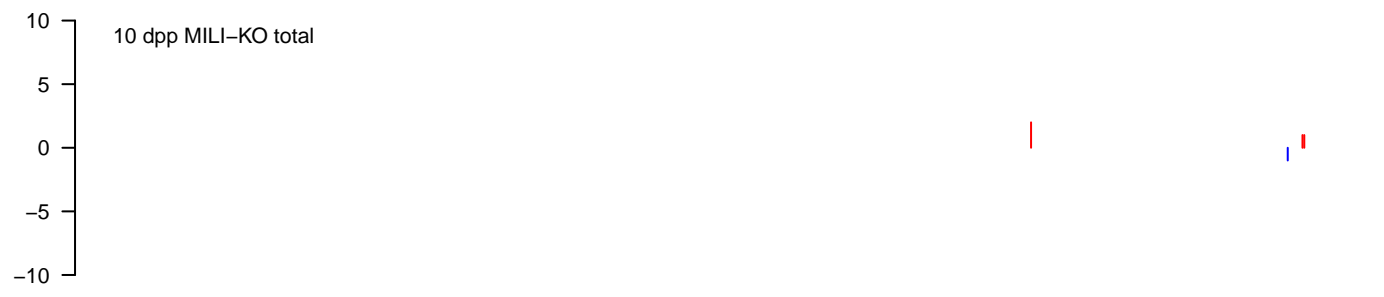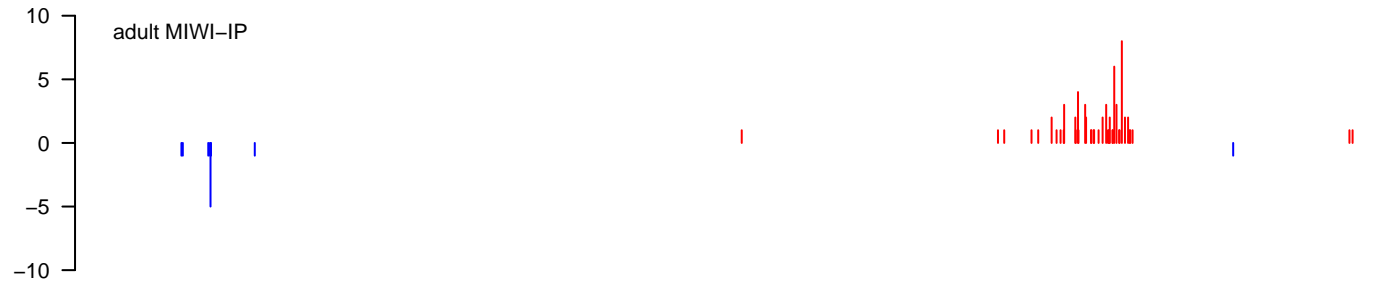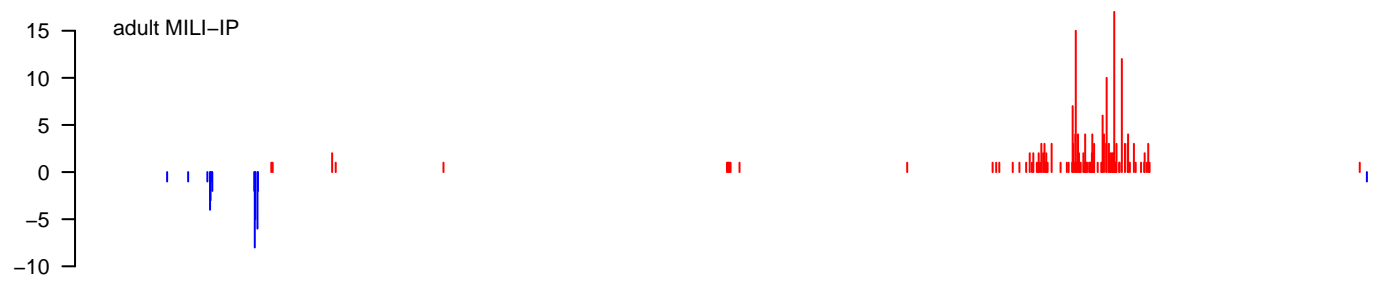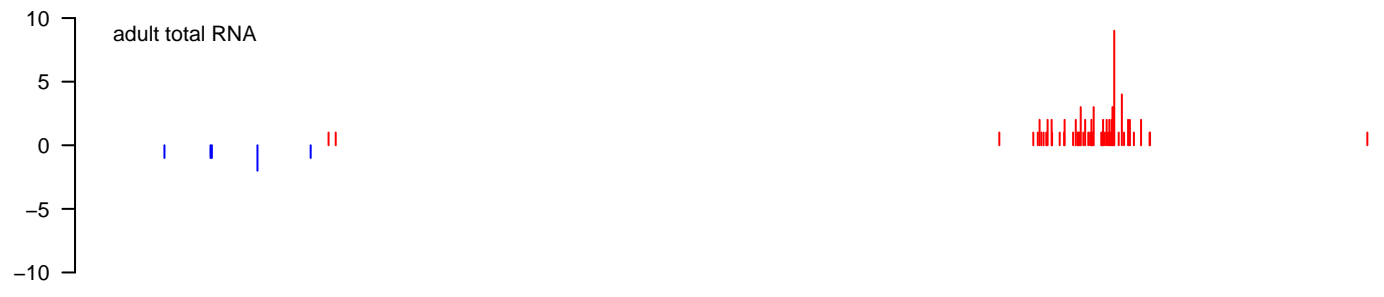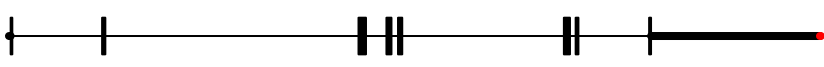

NM\_025454 chr1 95700541 95718677 + Ing5

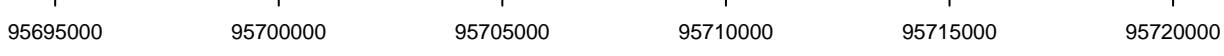

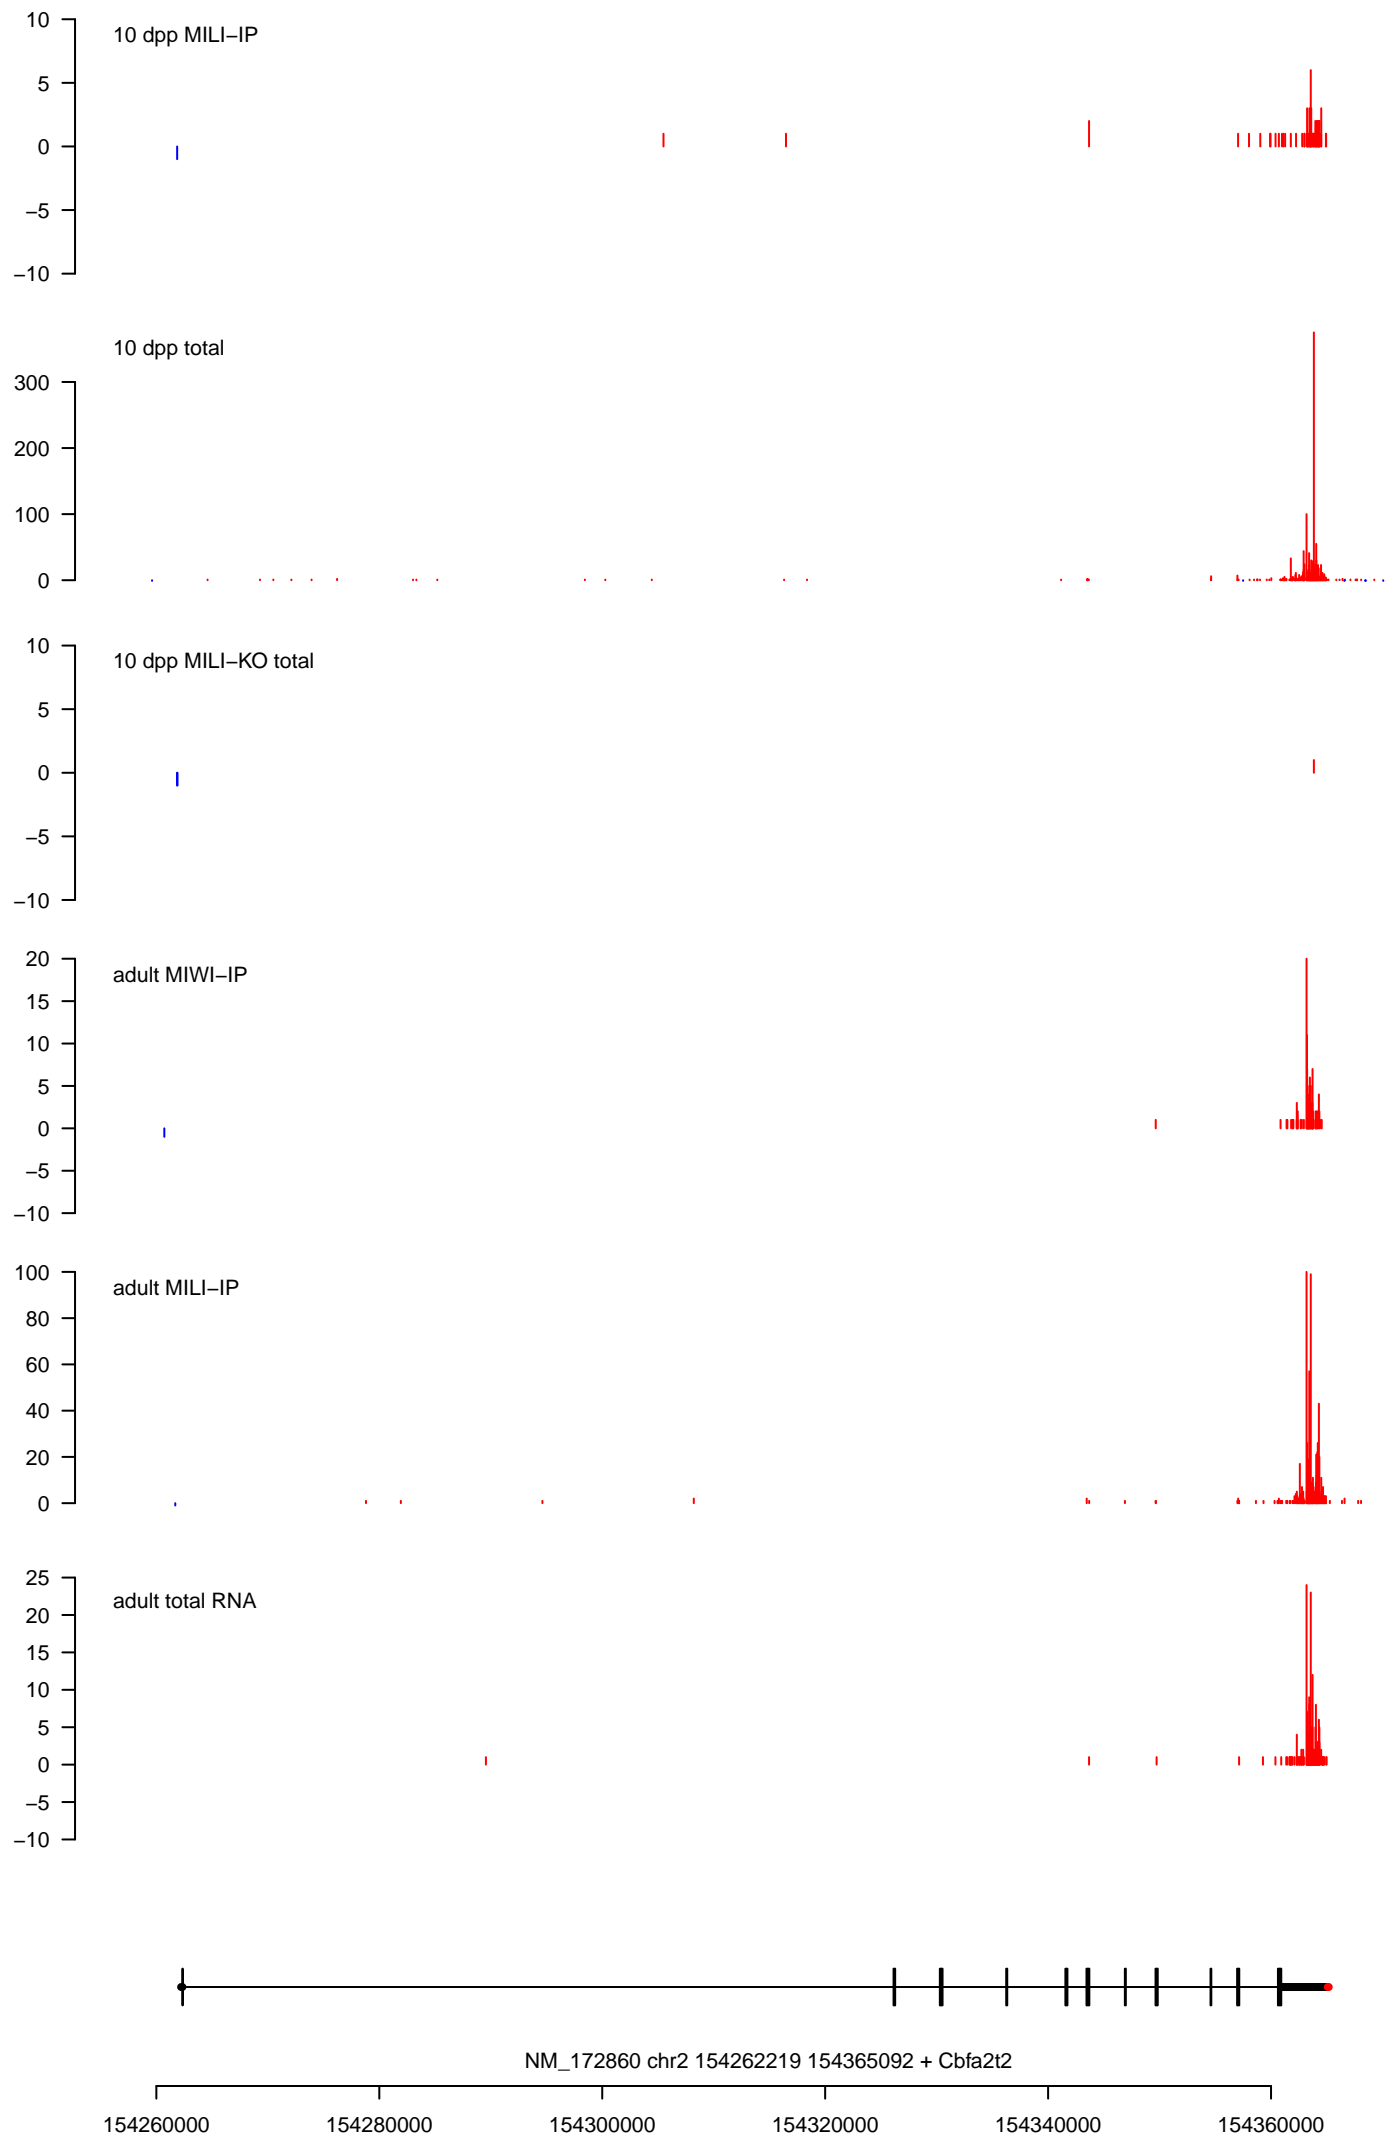



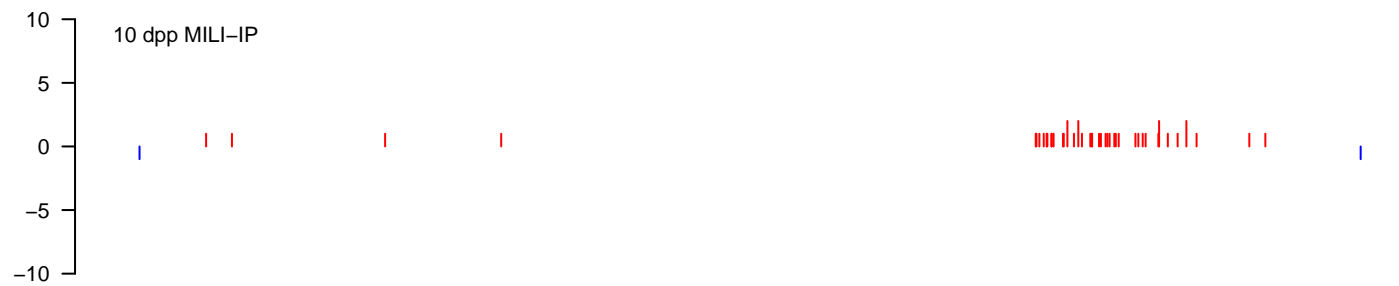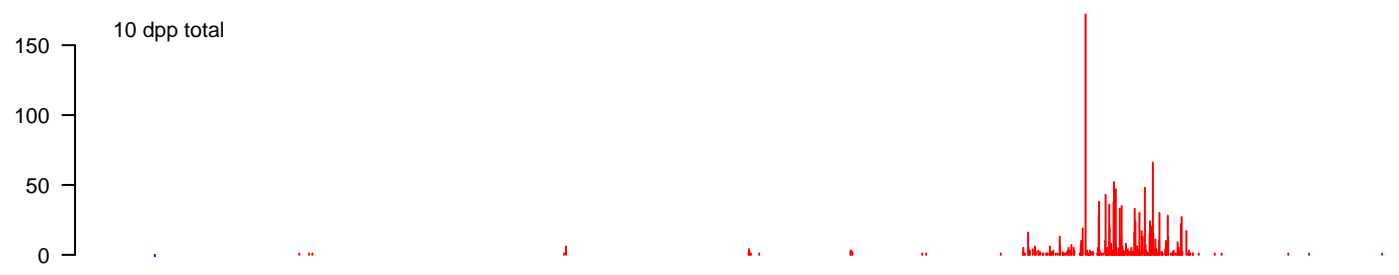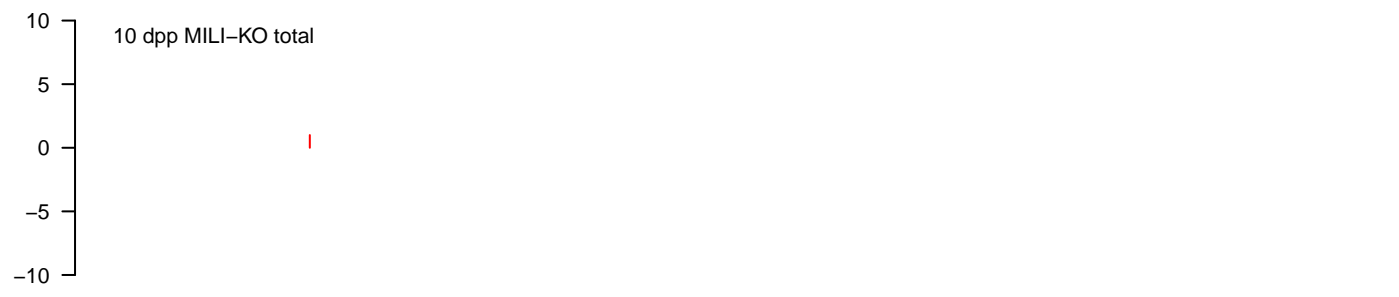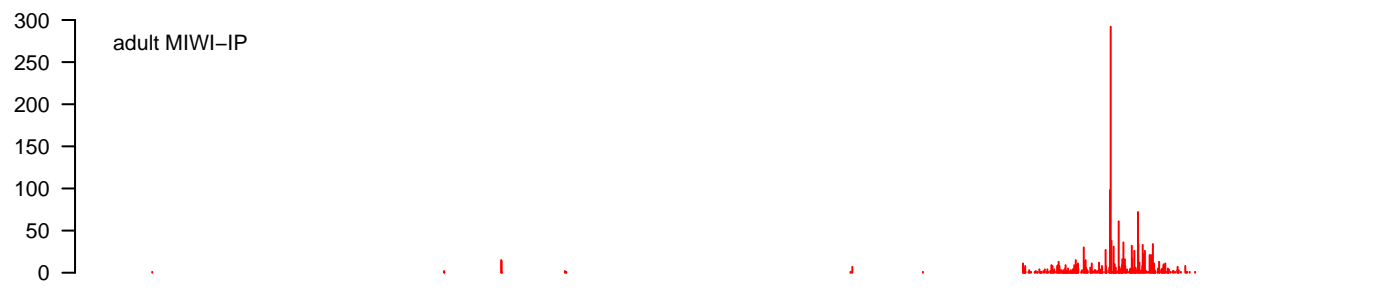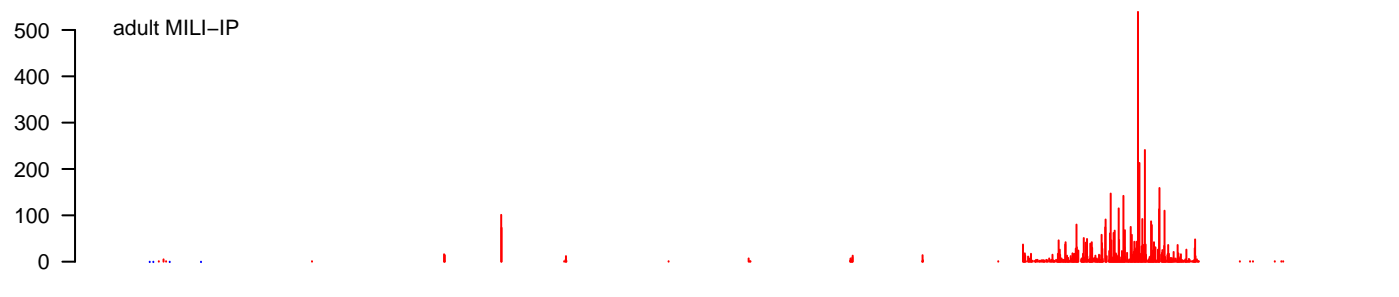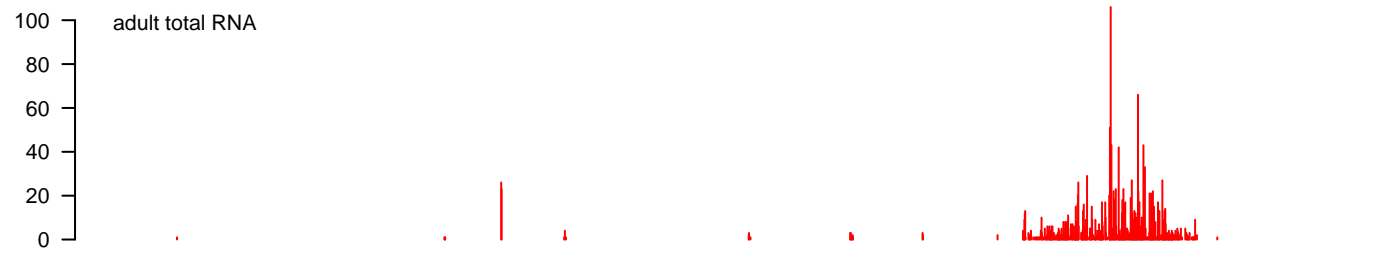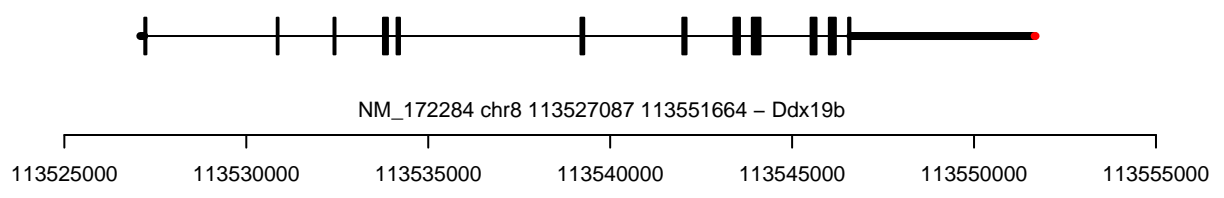

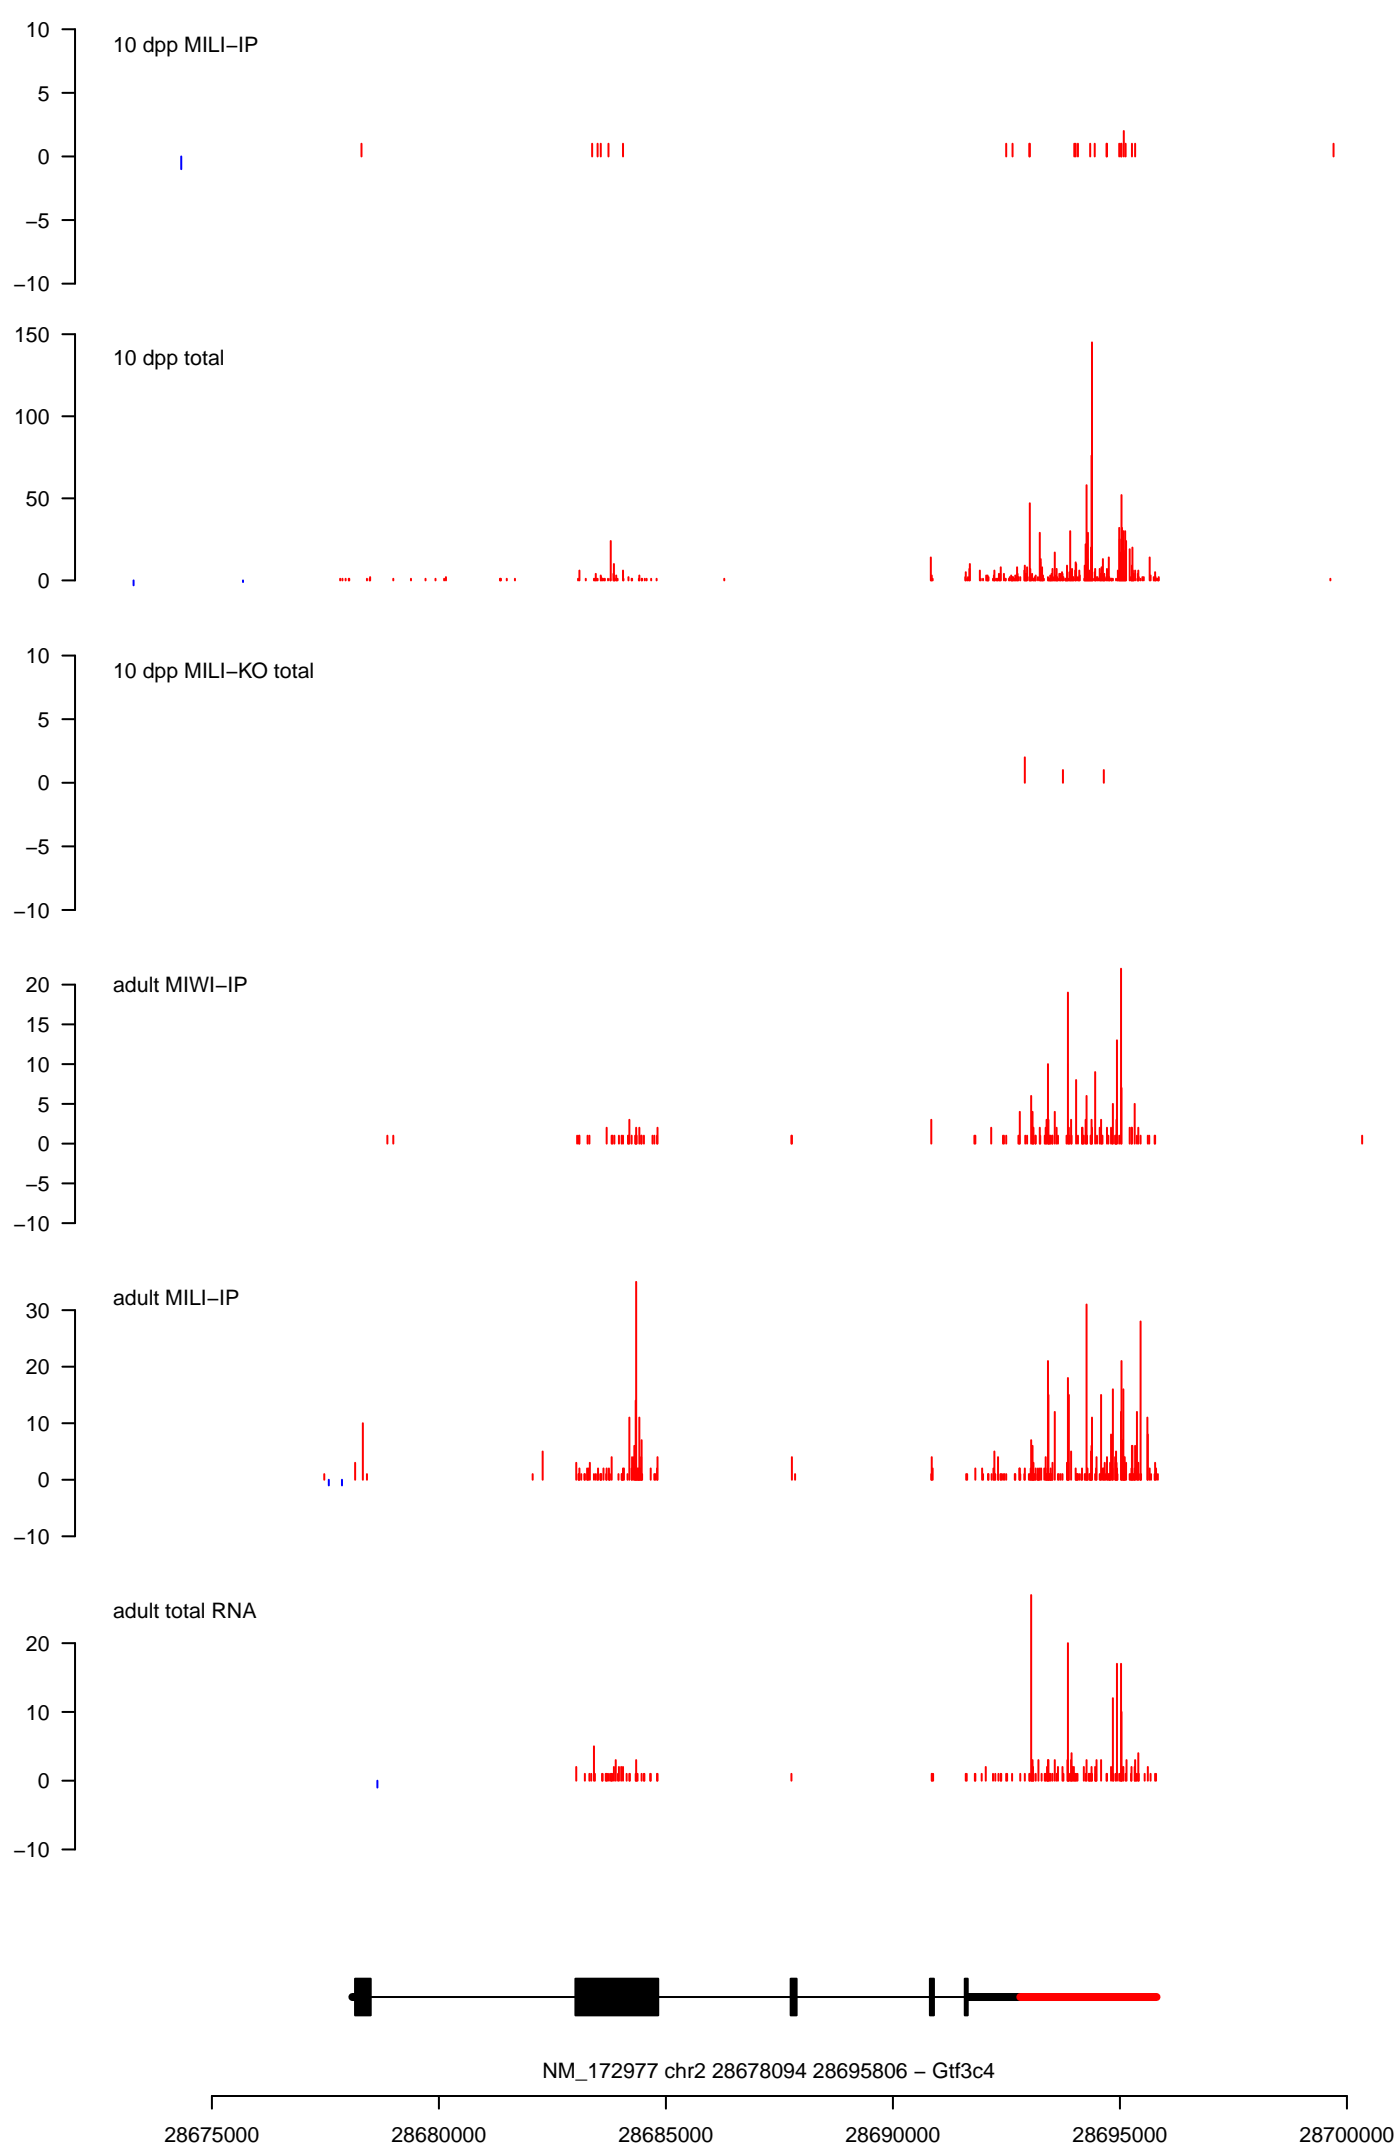

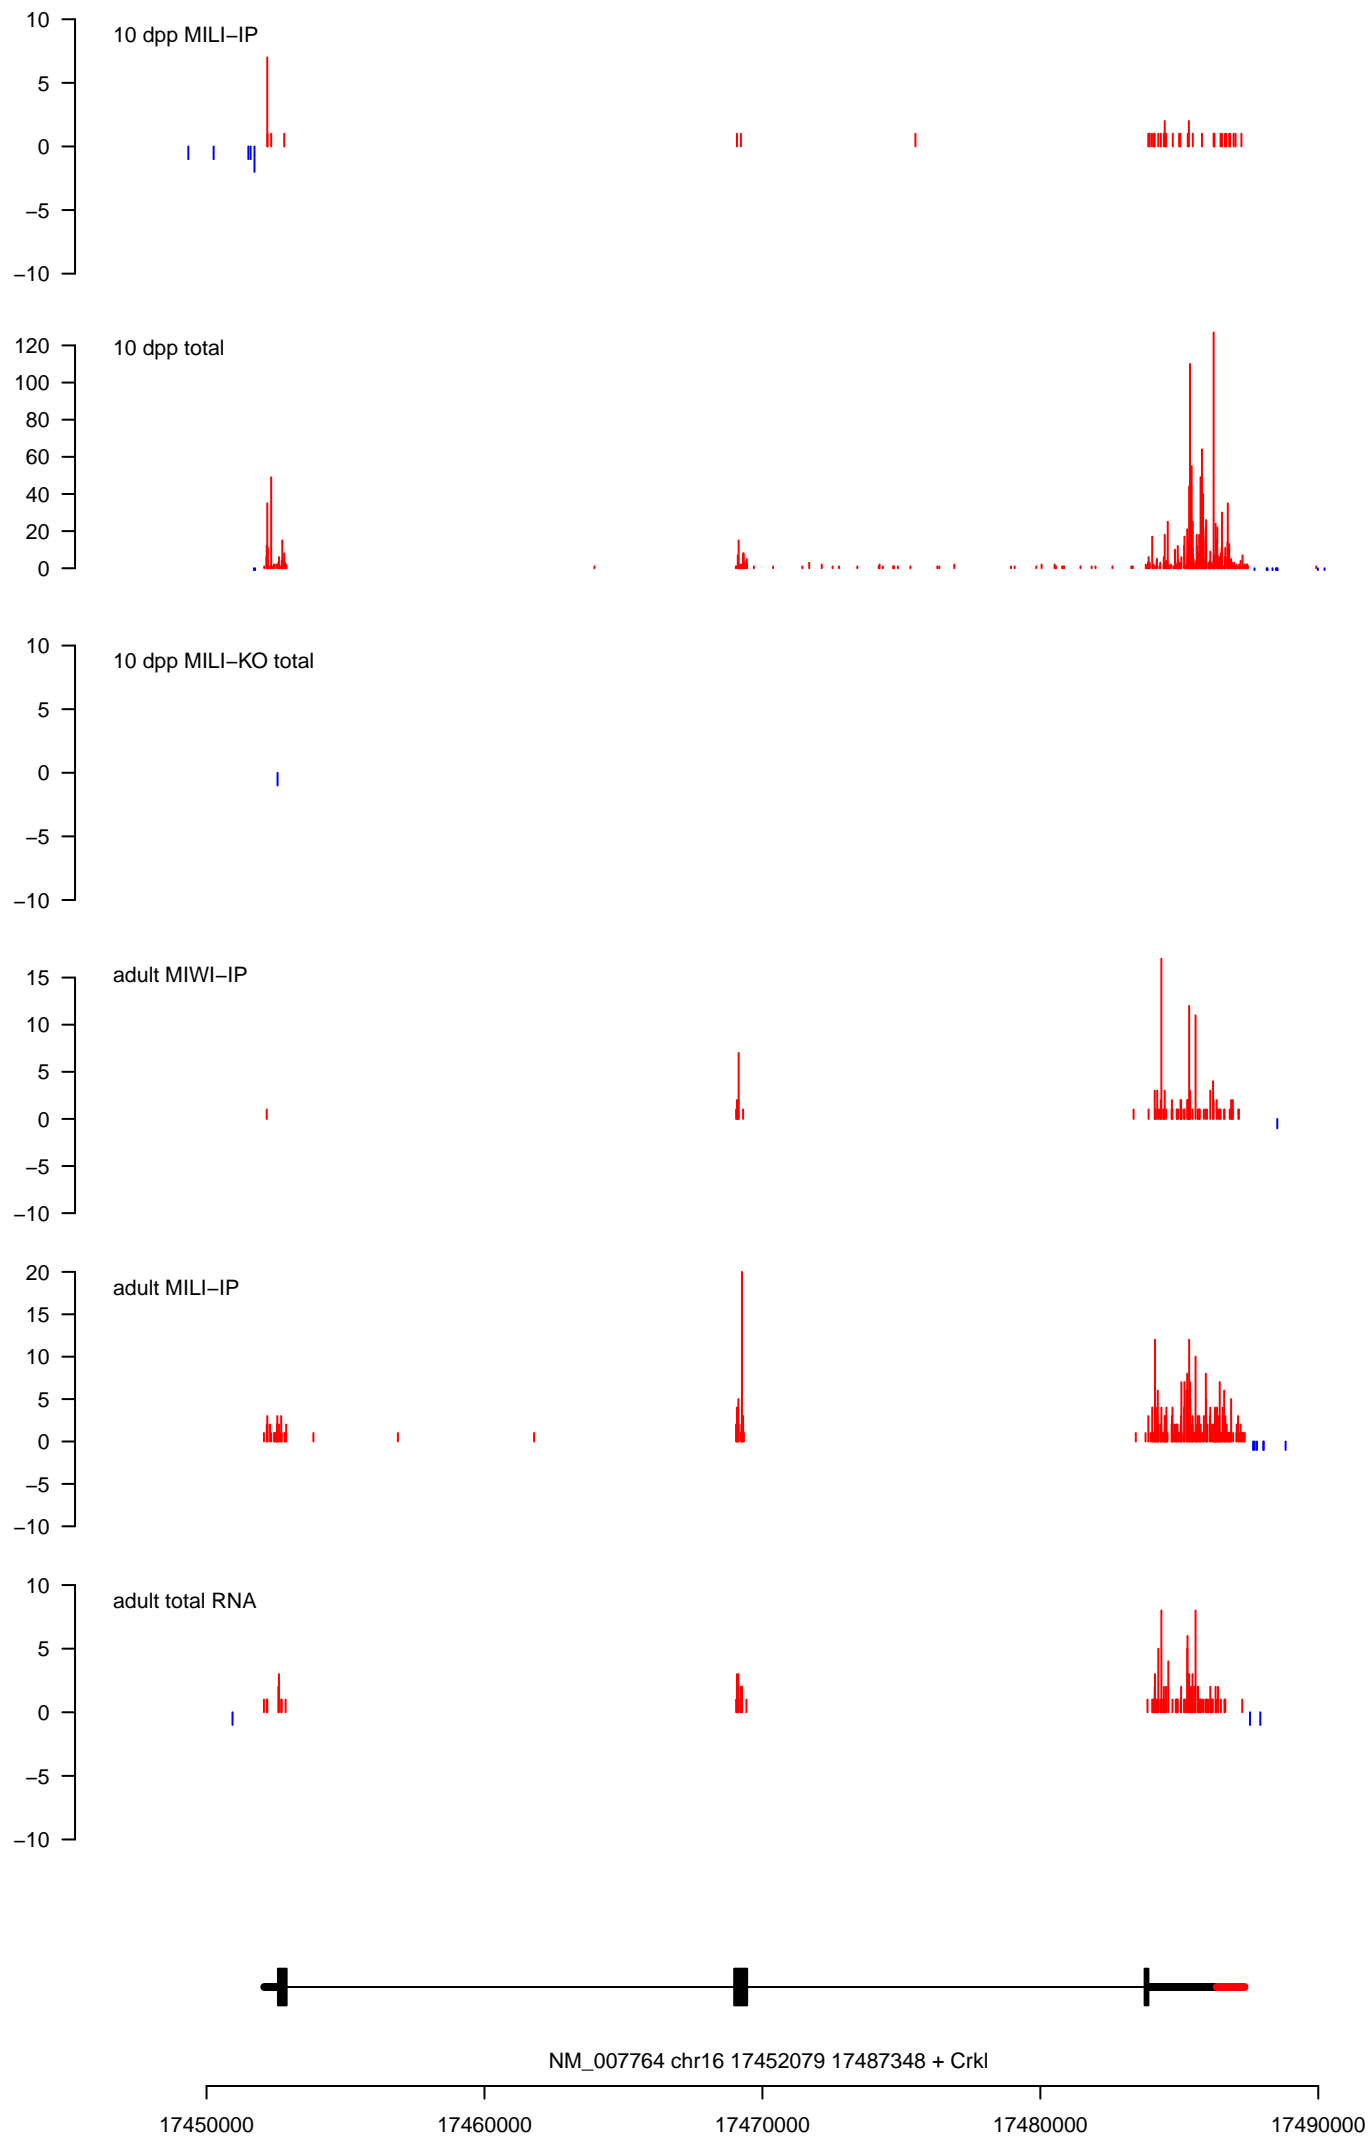

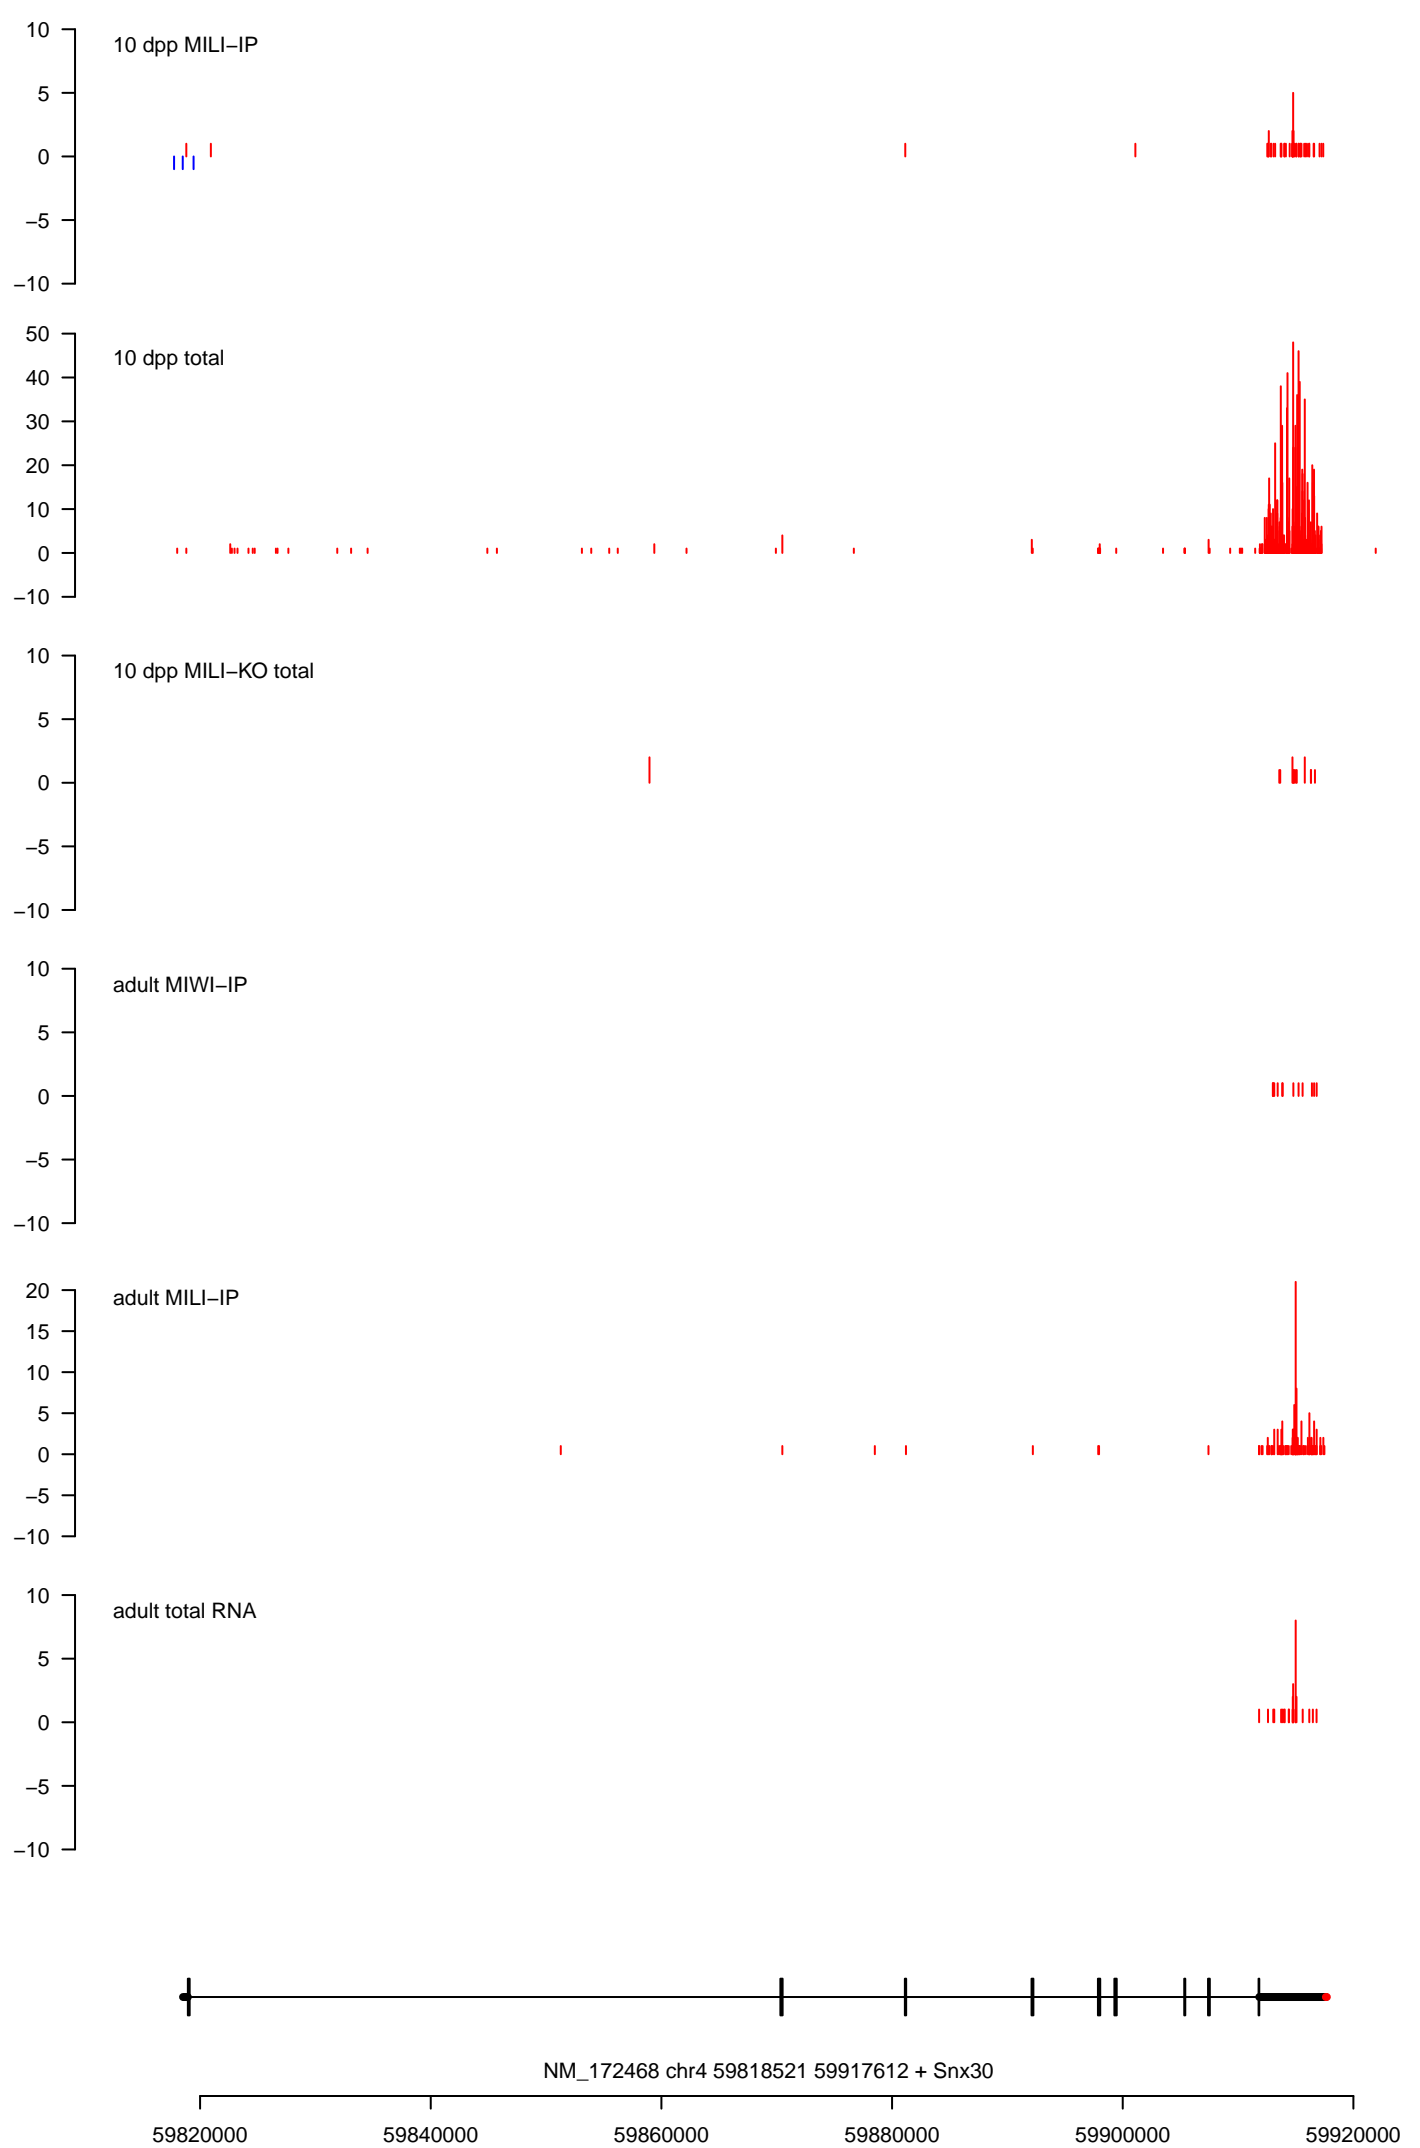

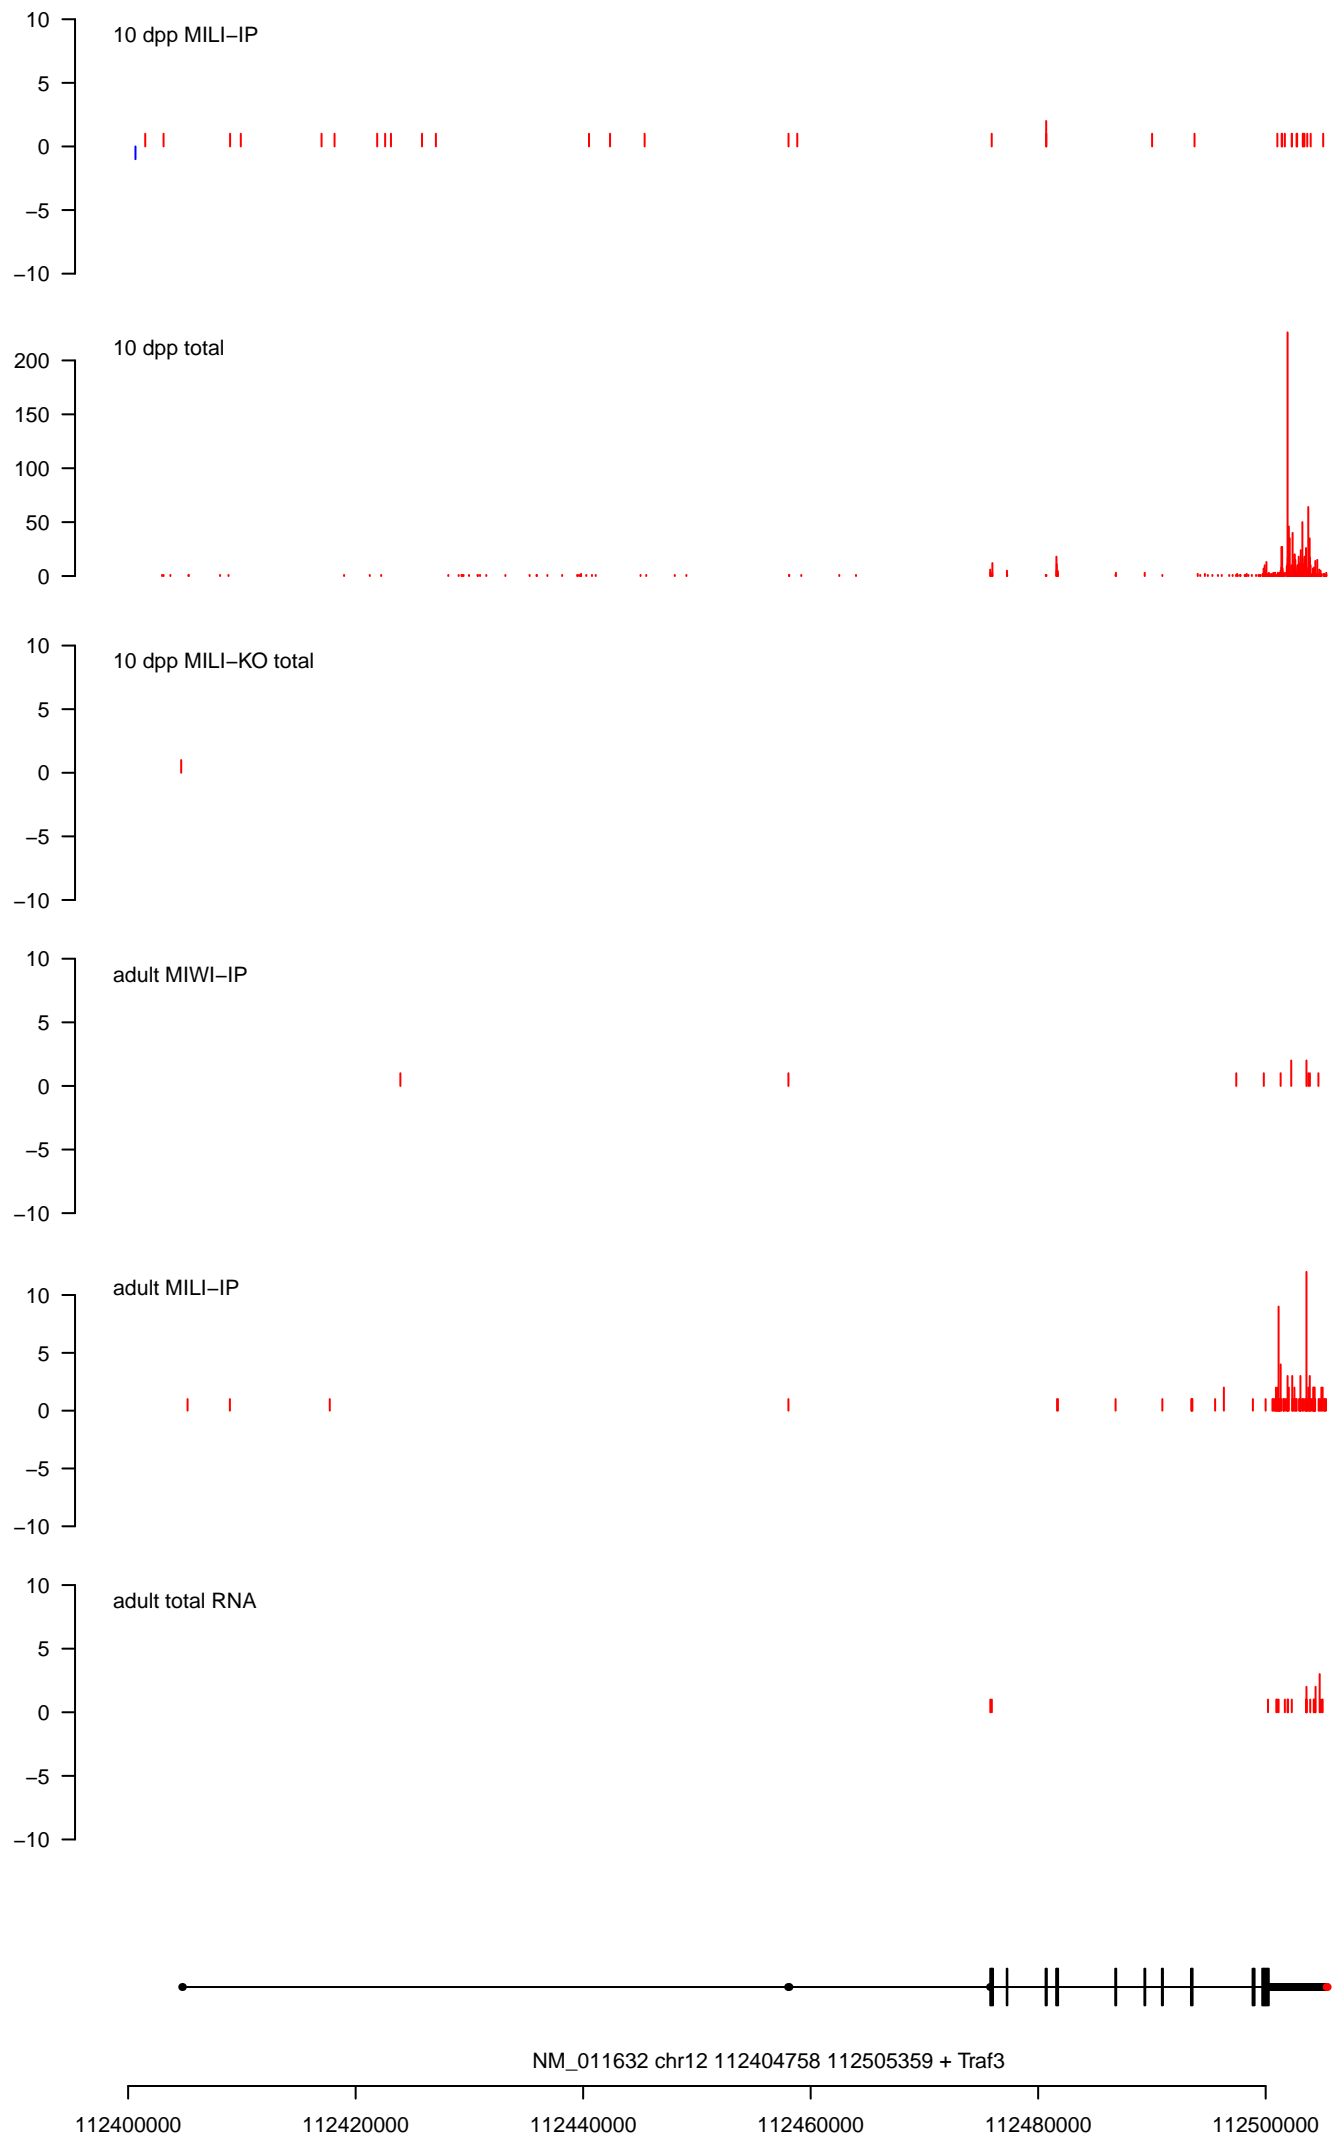

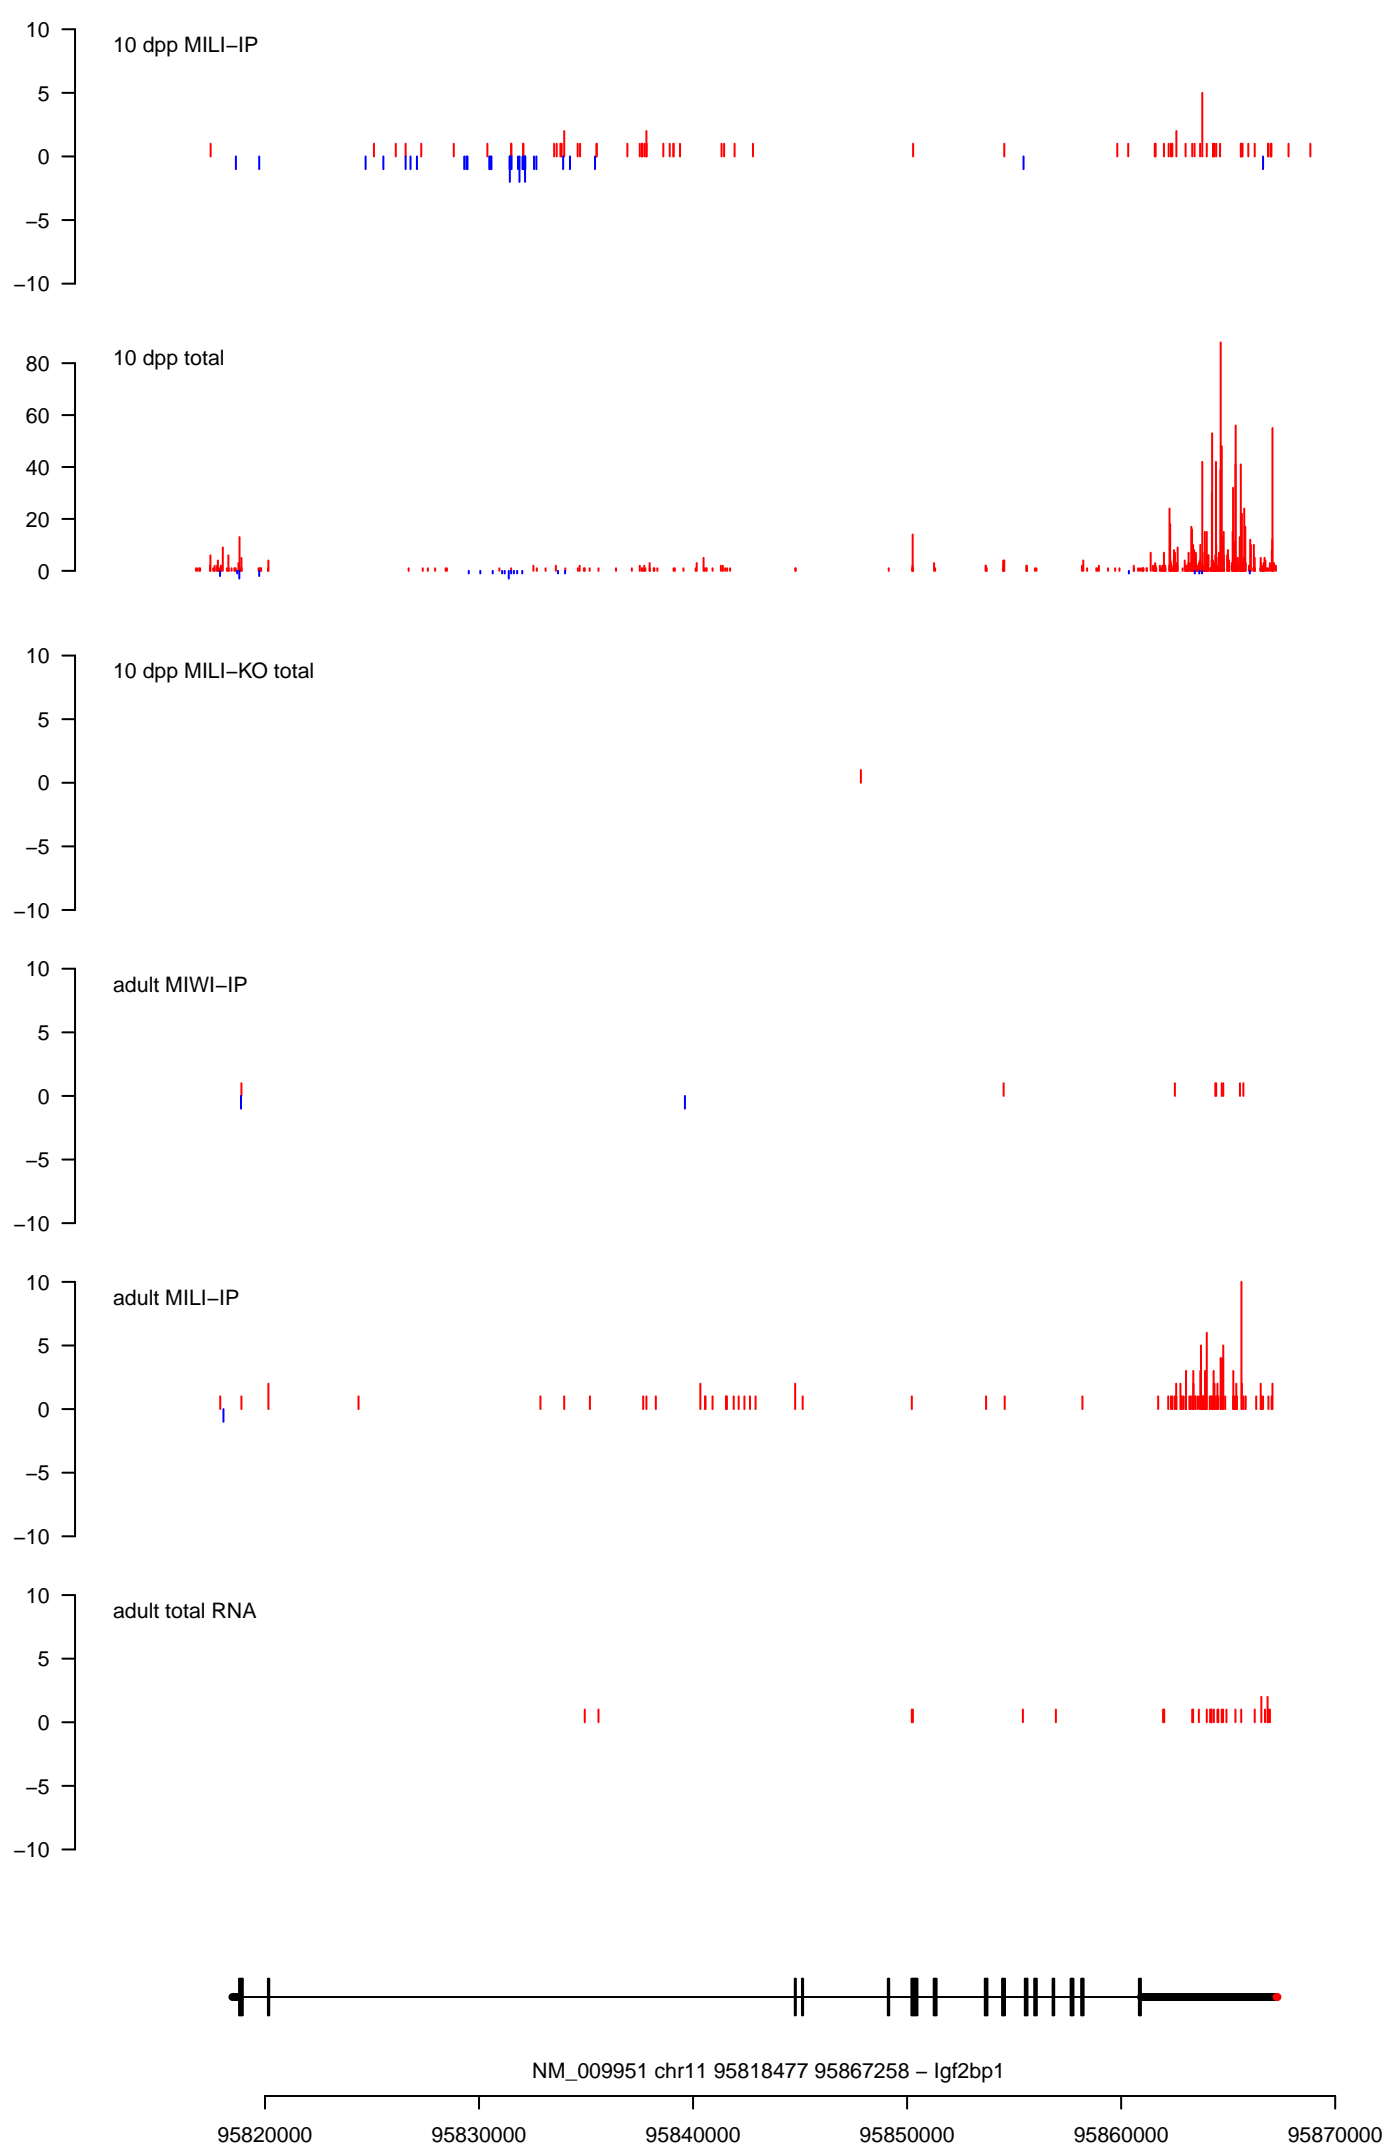

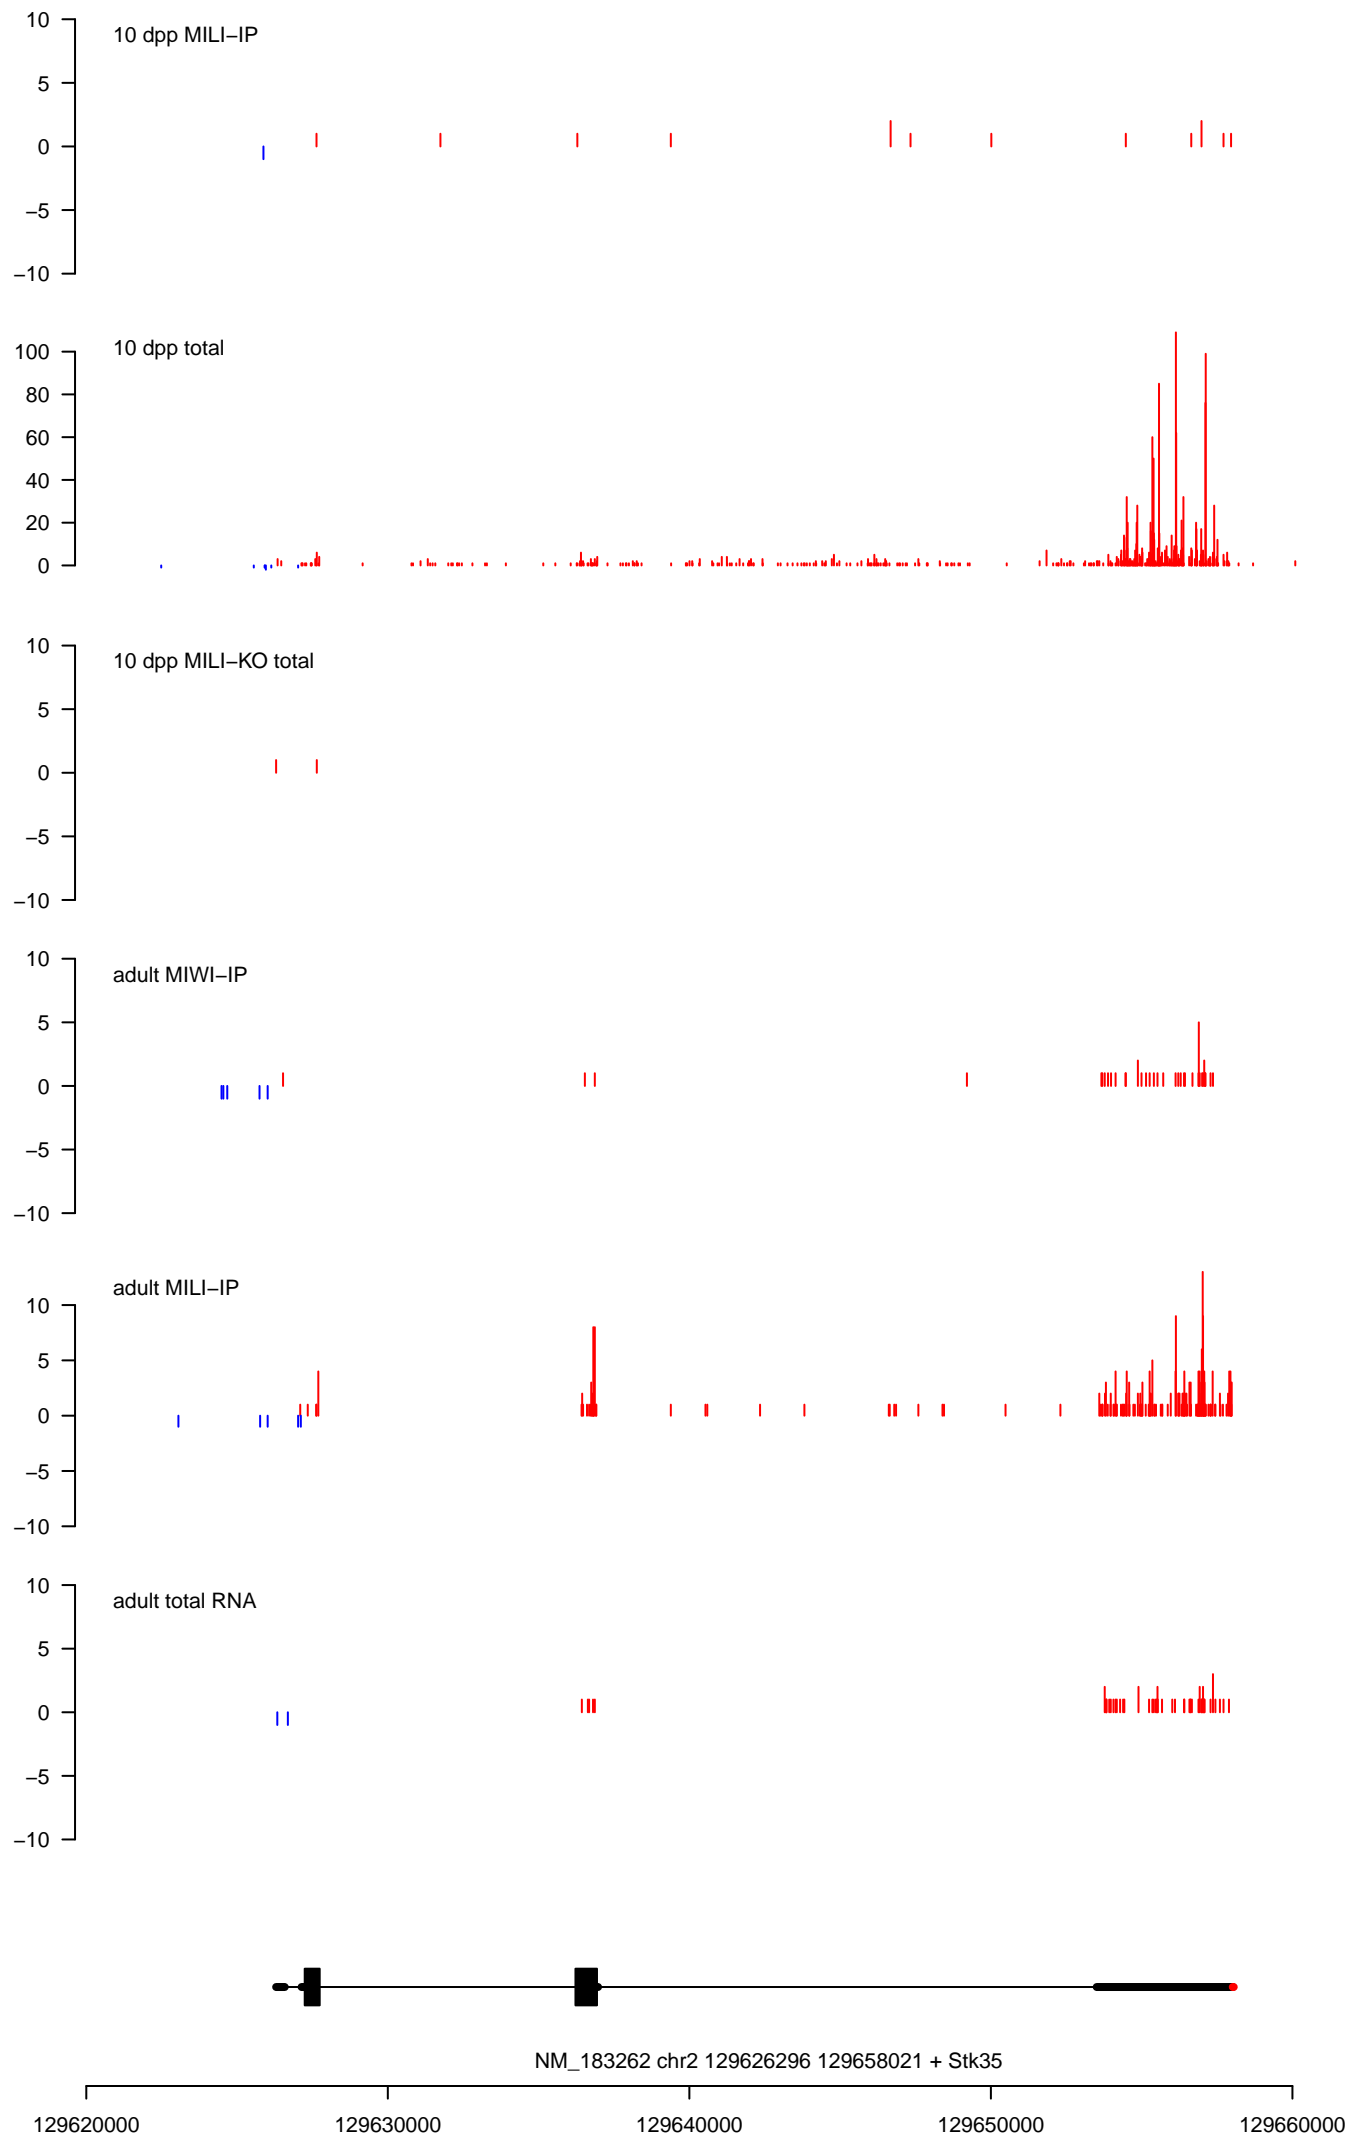

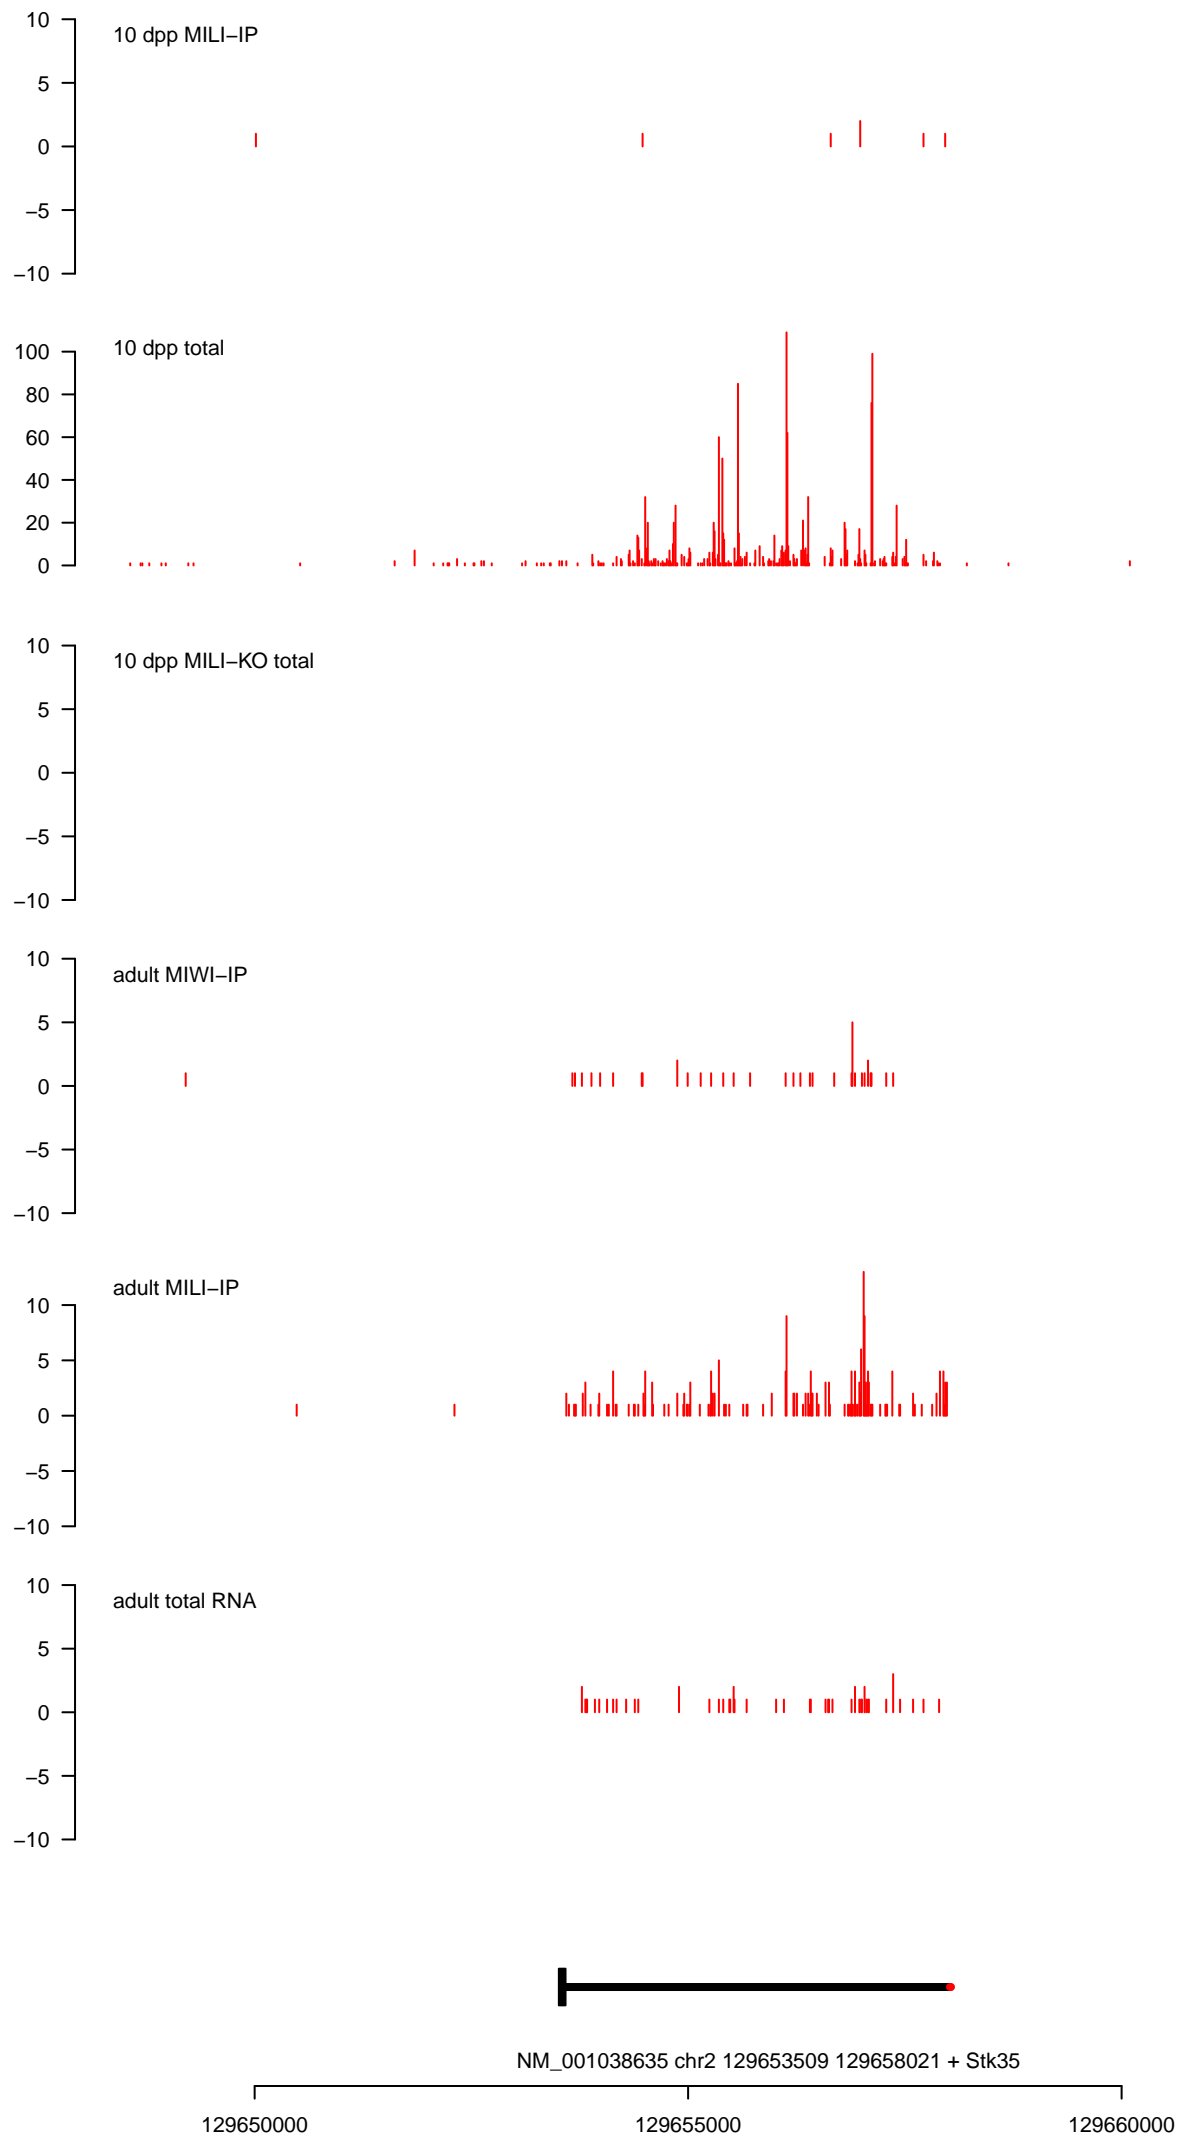



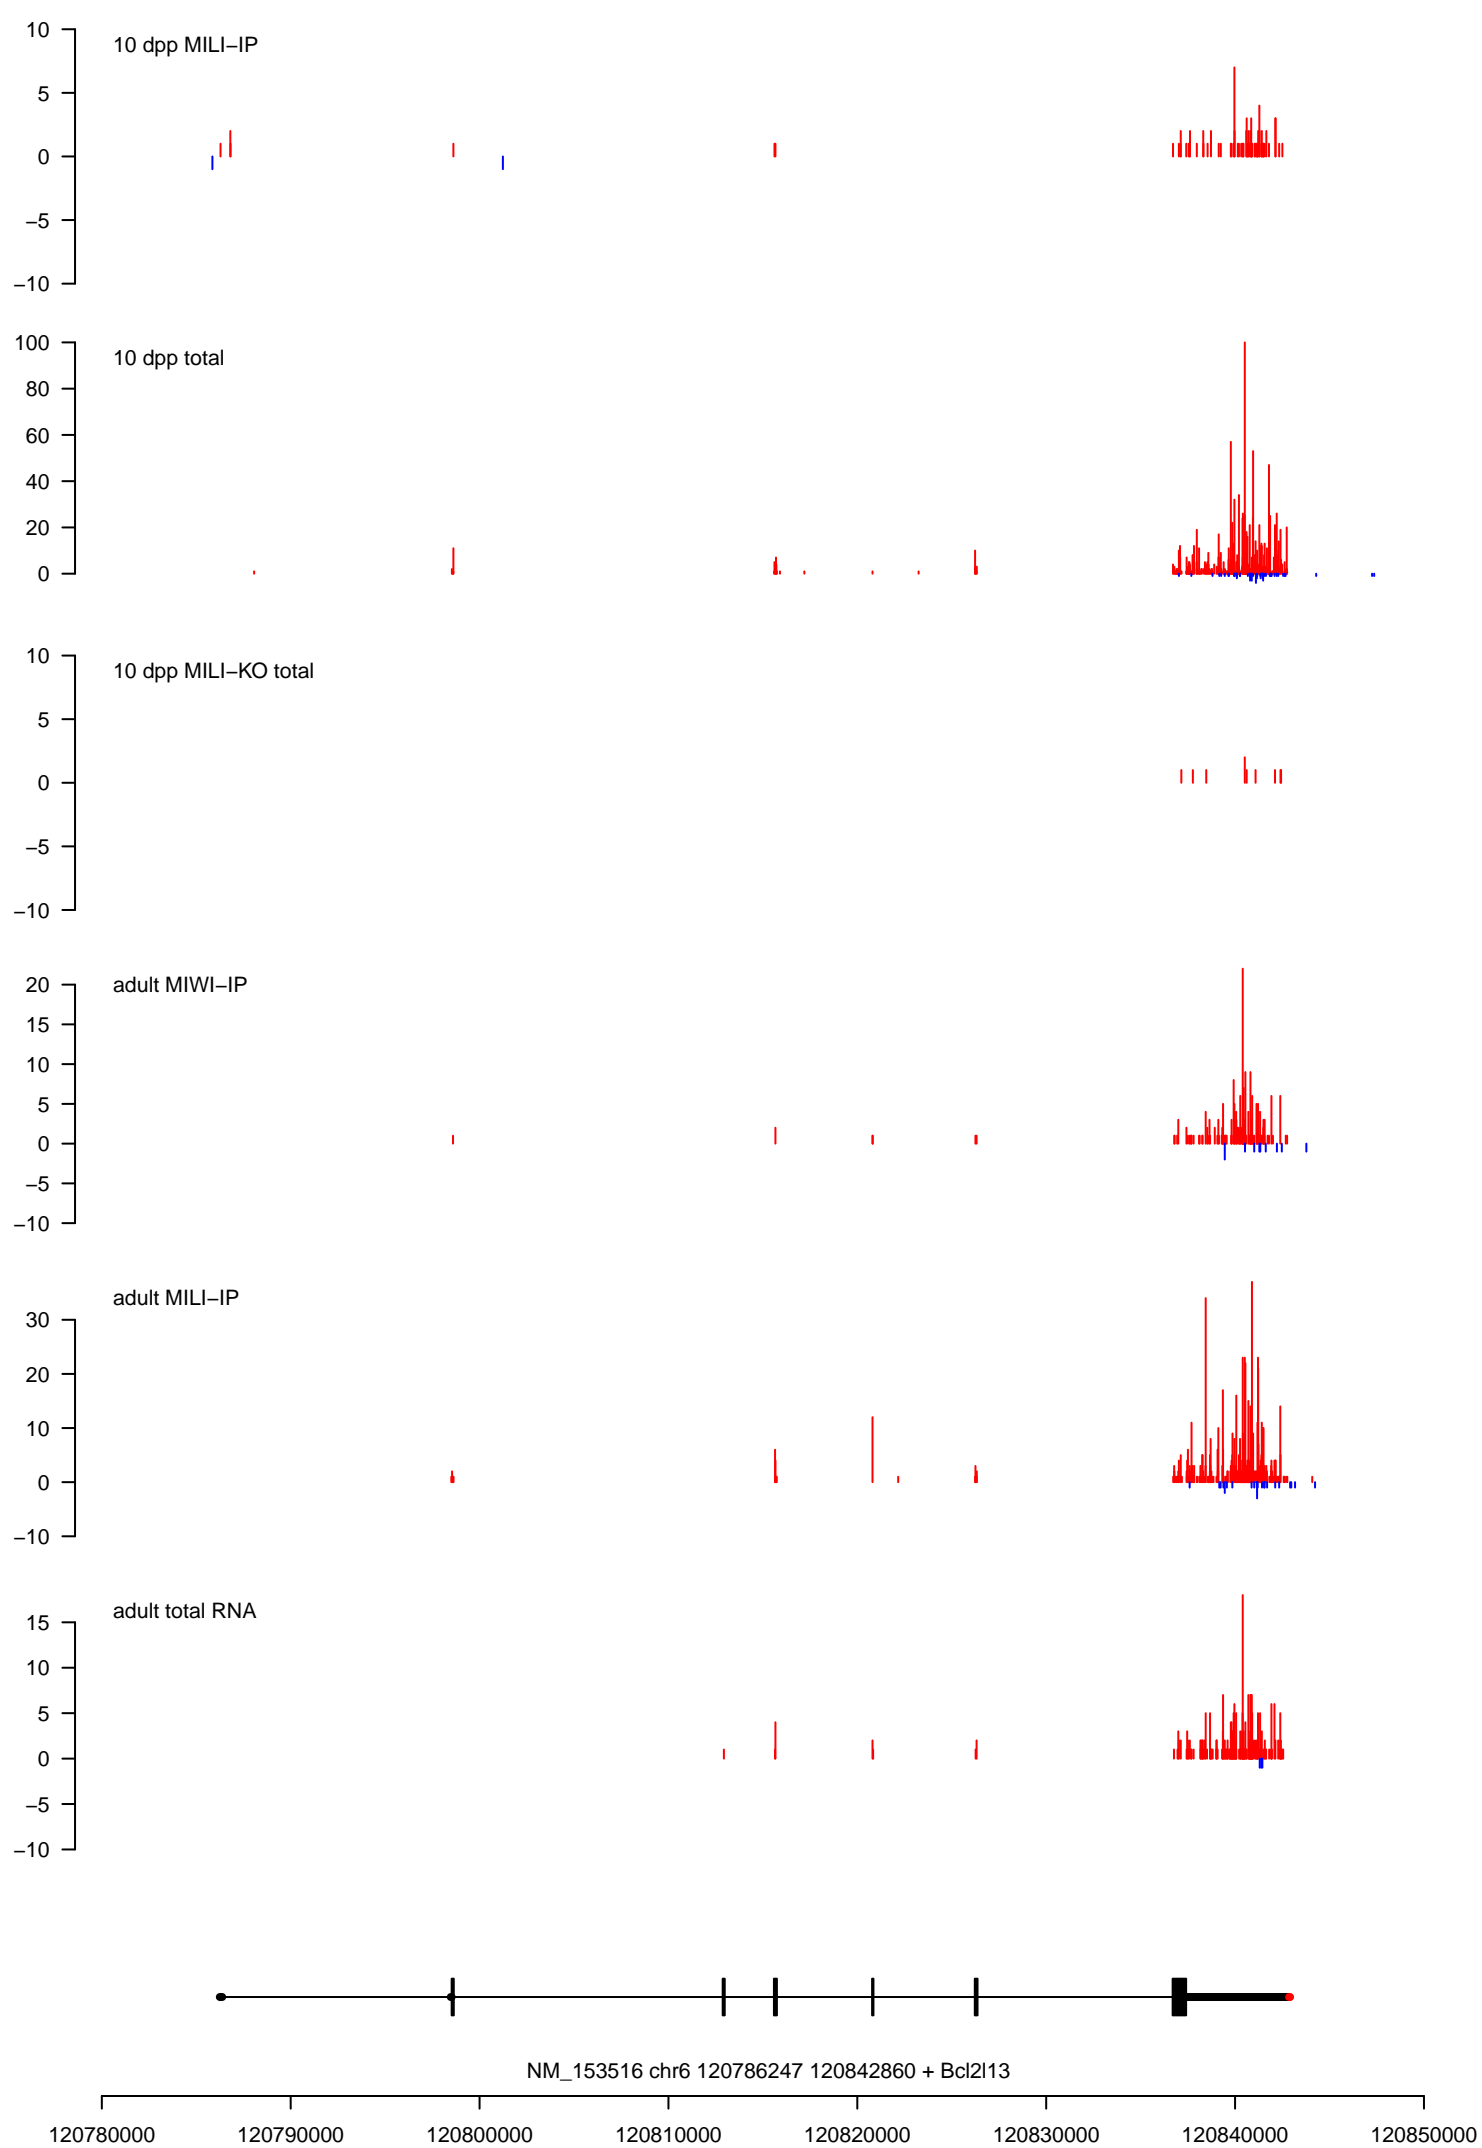

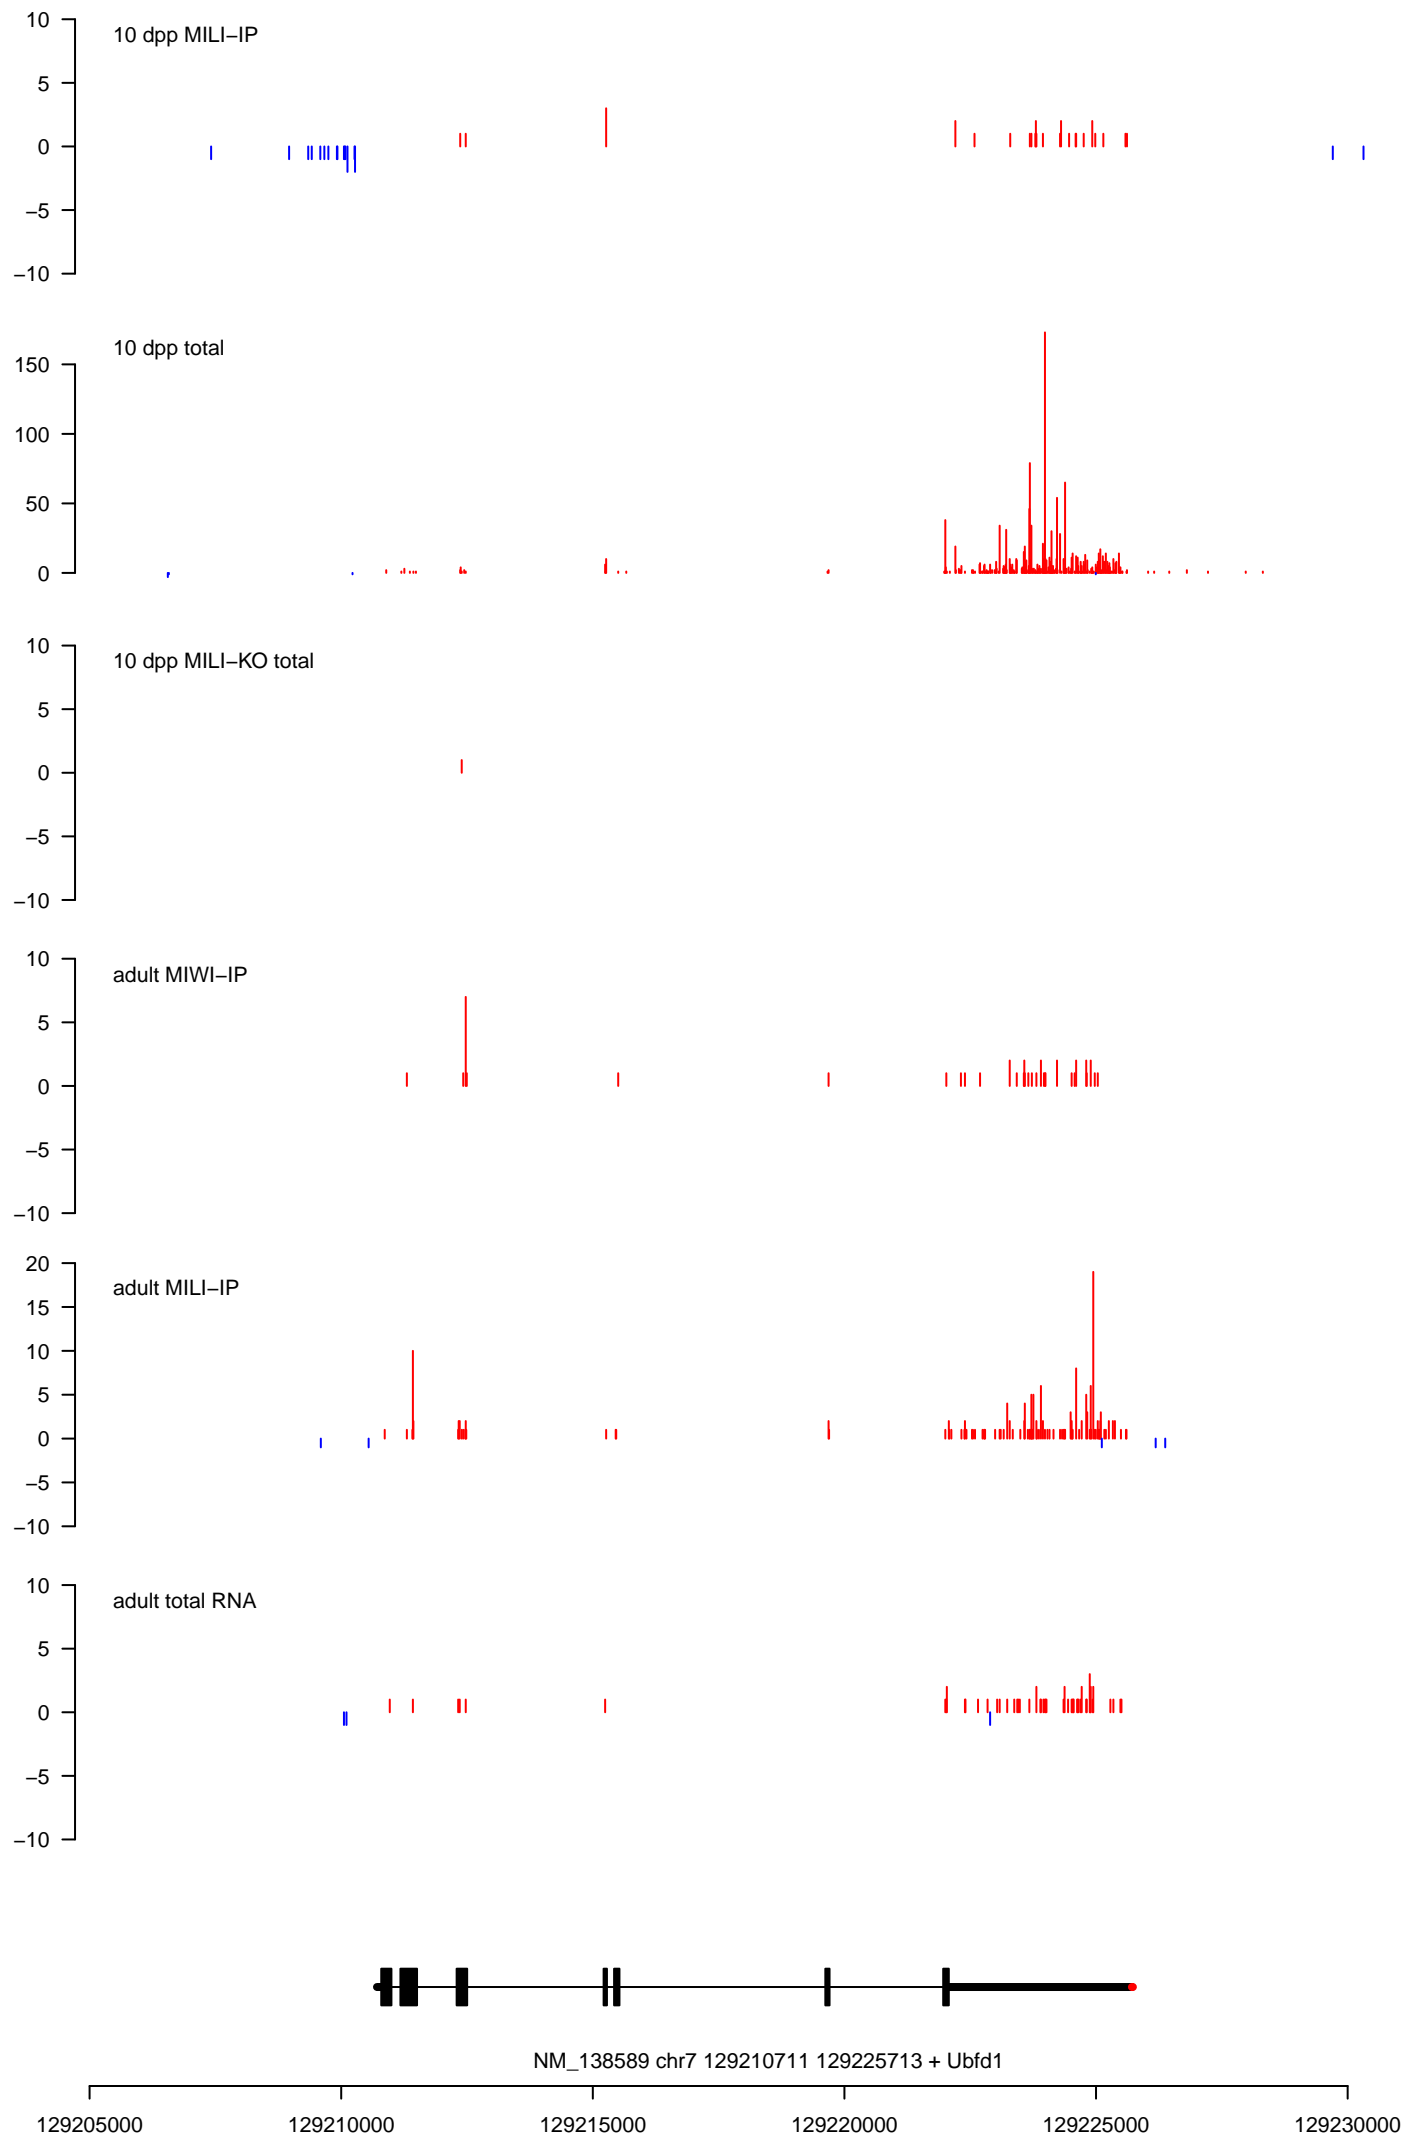

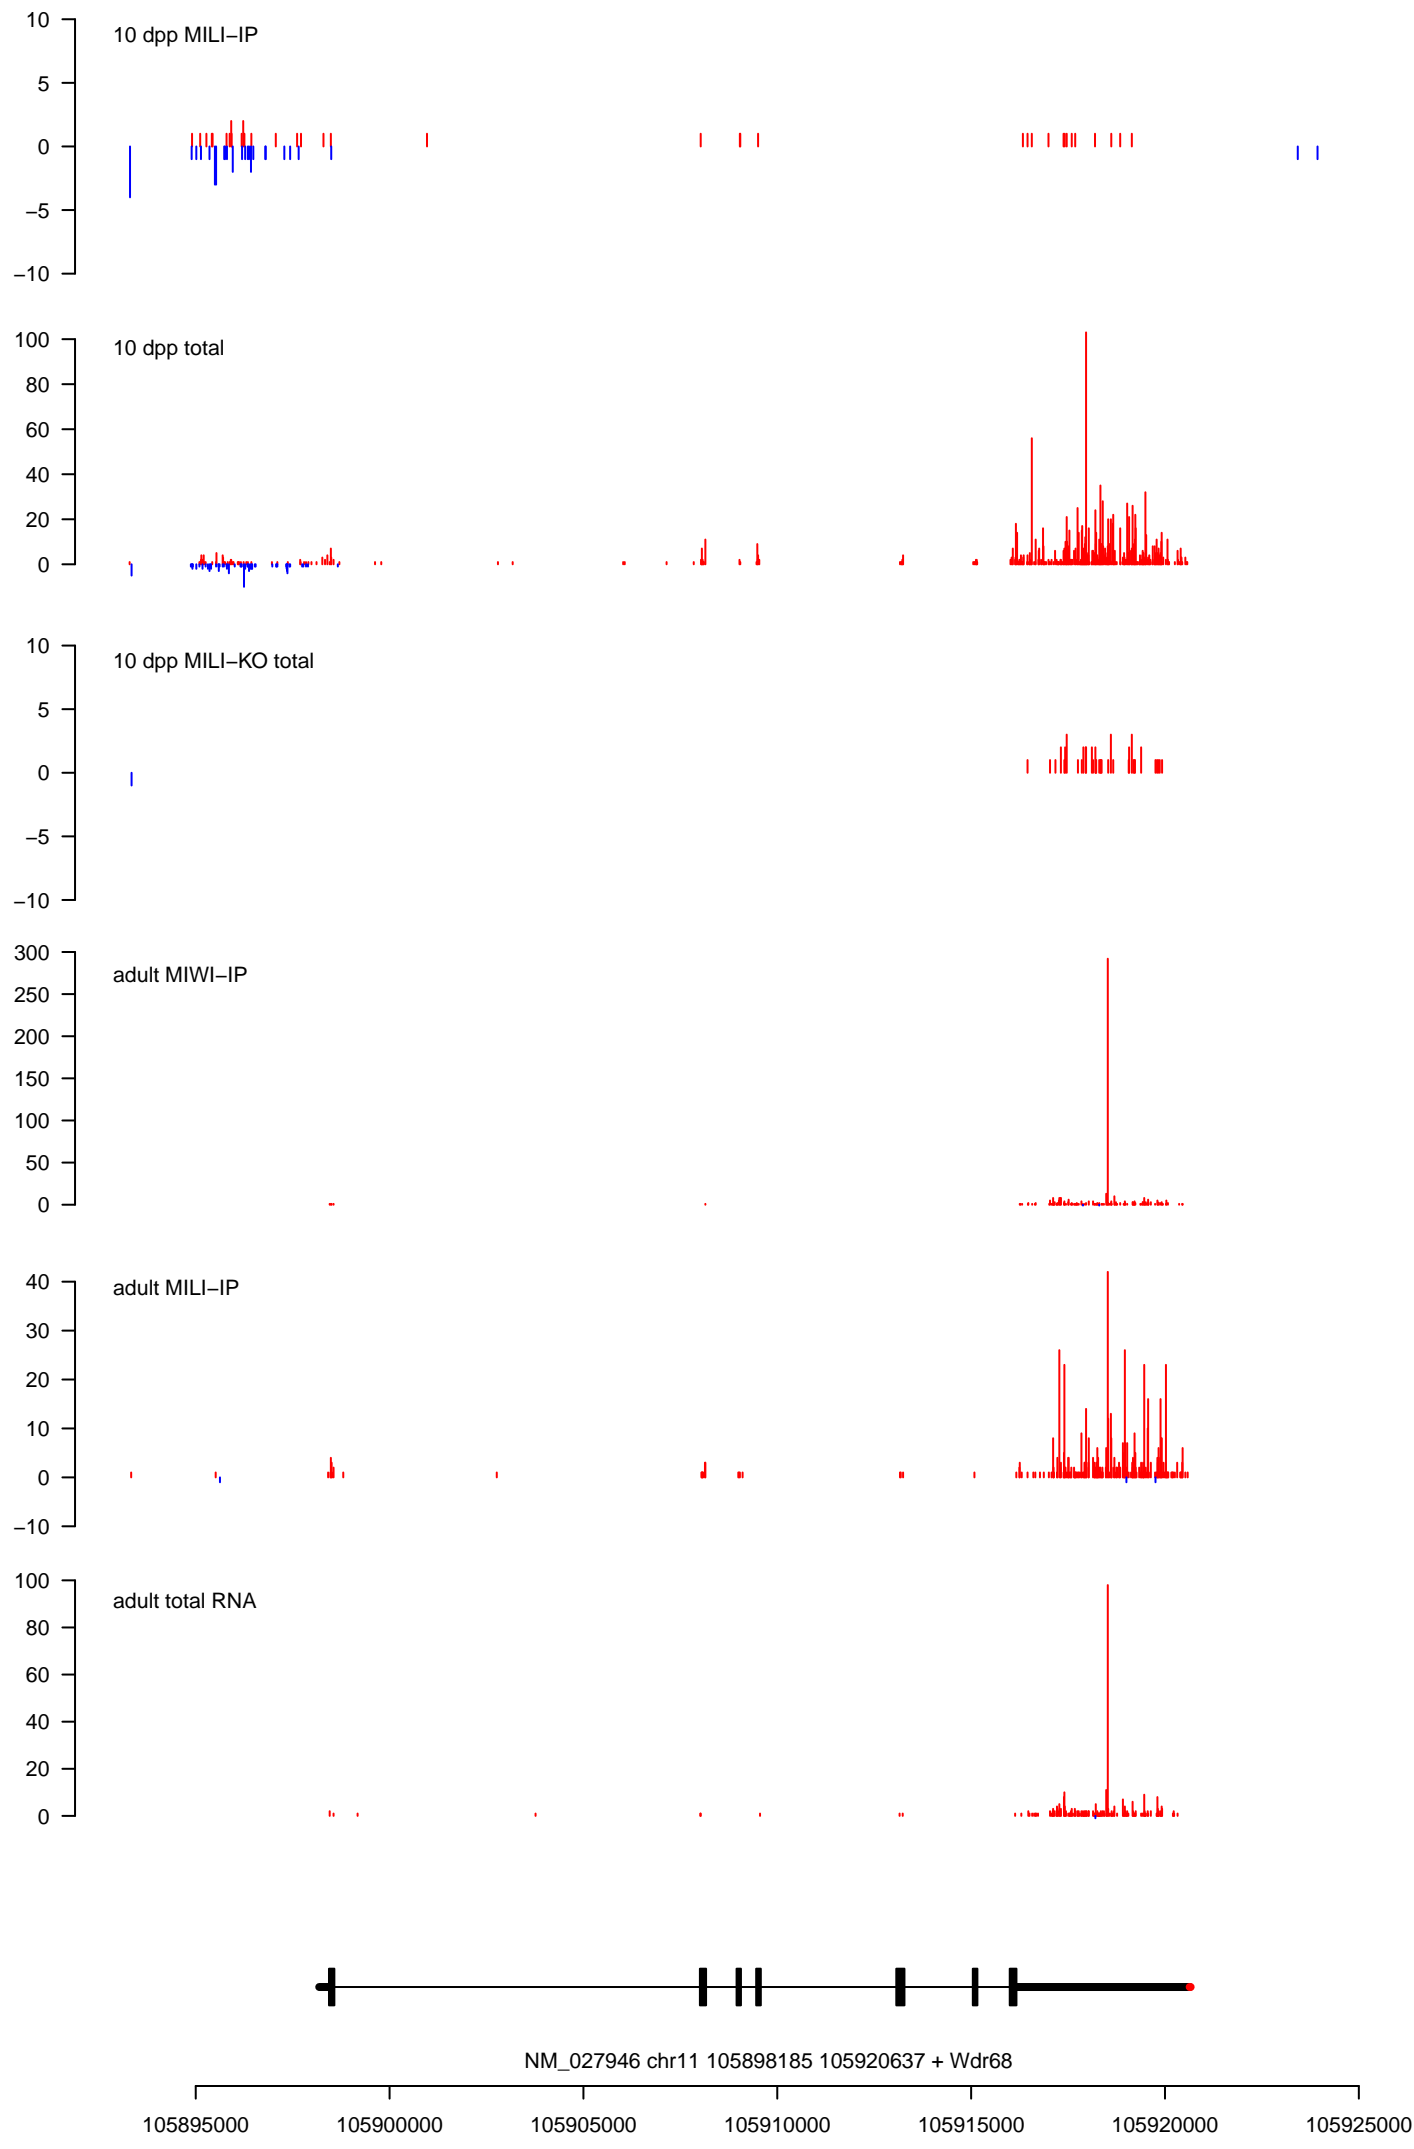

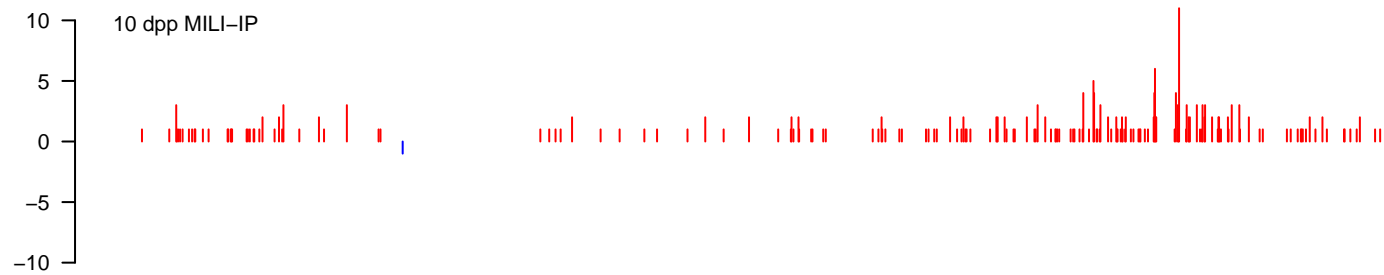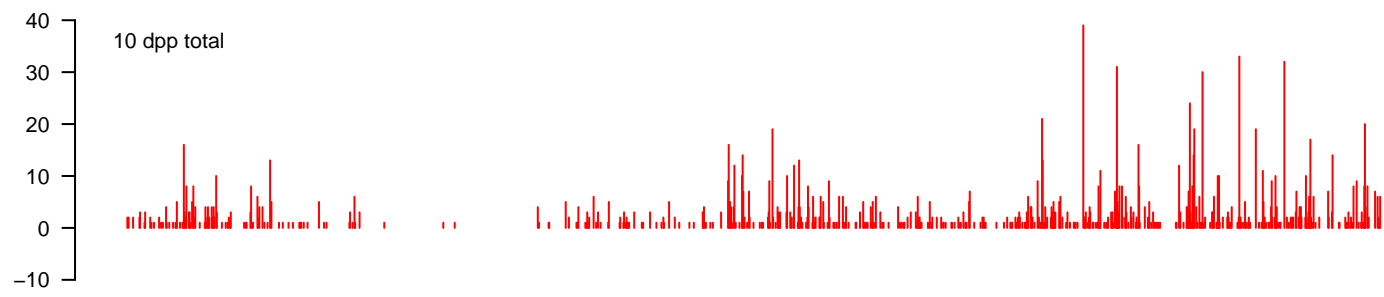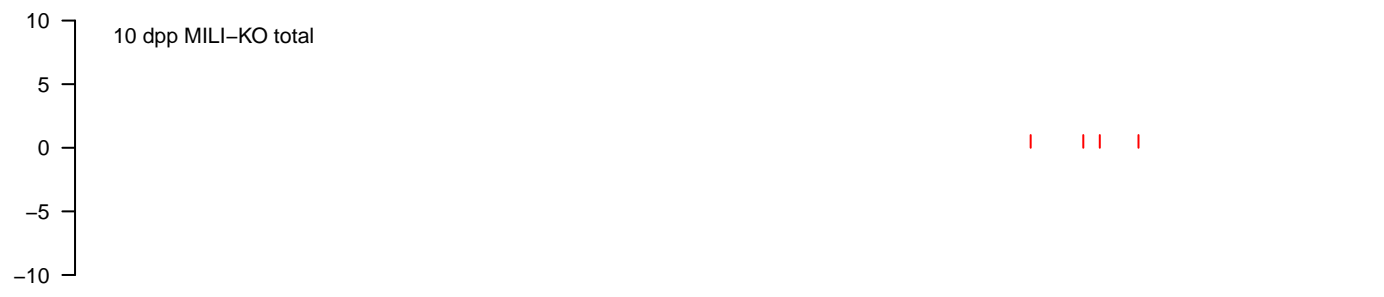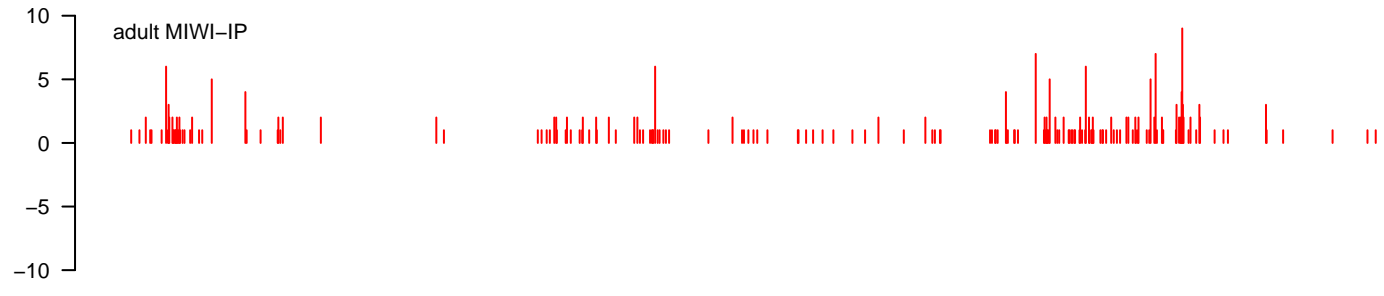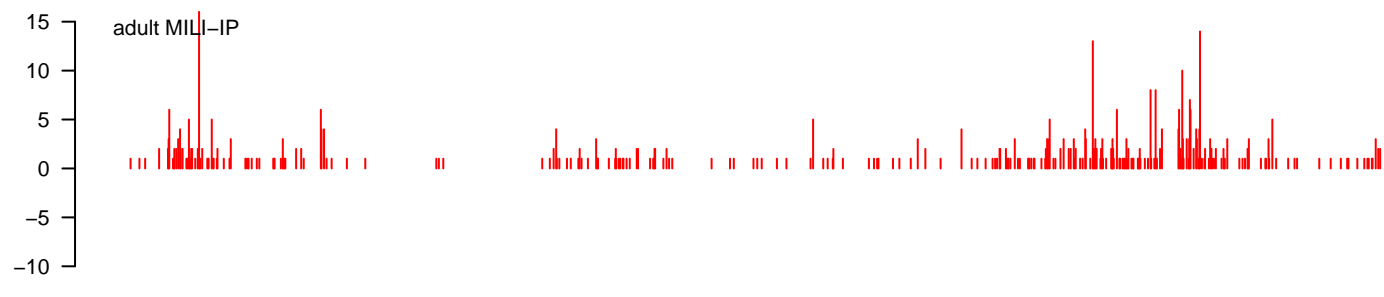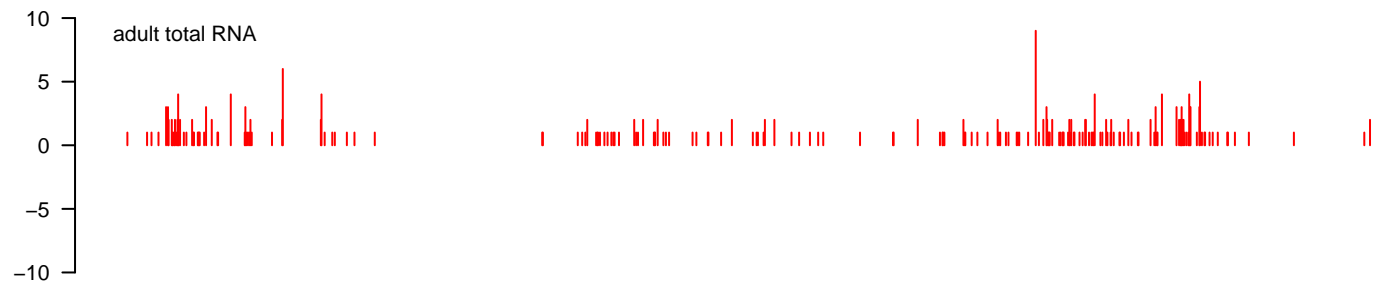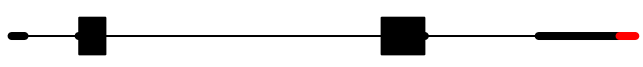

NM\_009032 chr19 4784042 4793877 - Rbm4

4780000 4785000 4790000 4795000

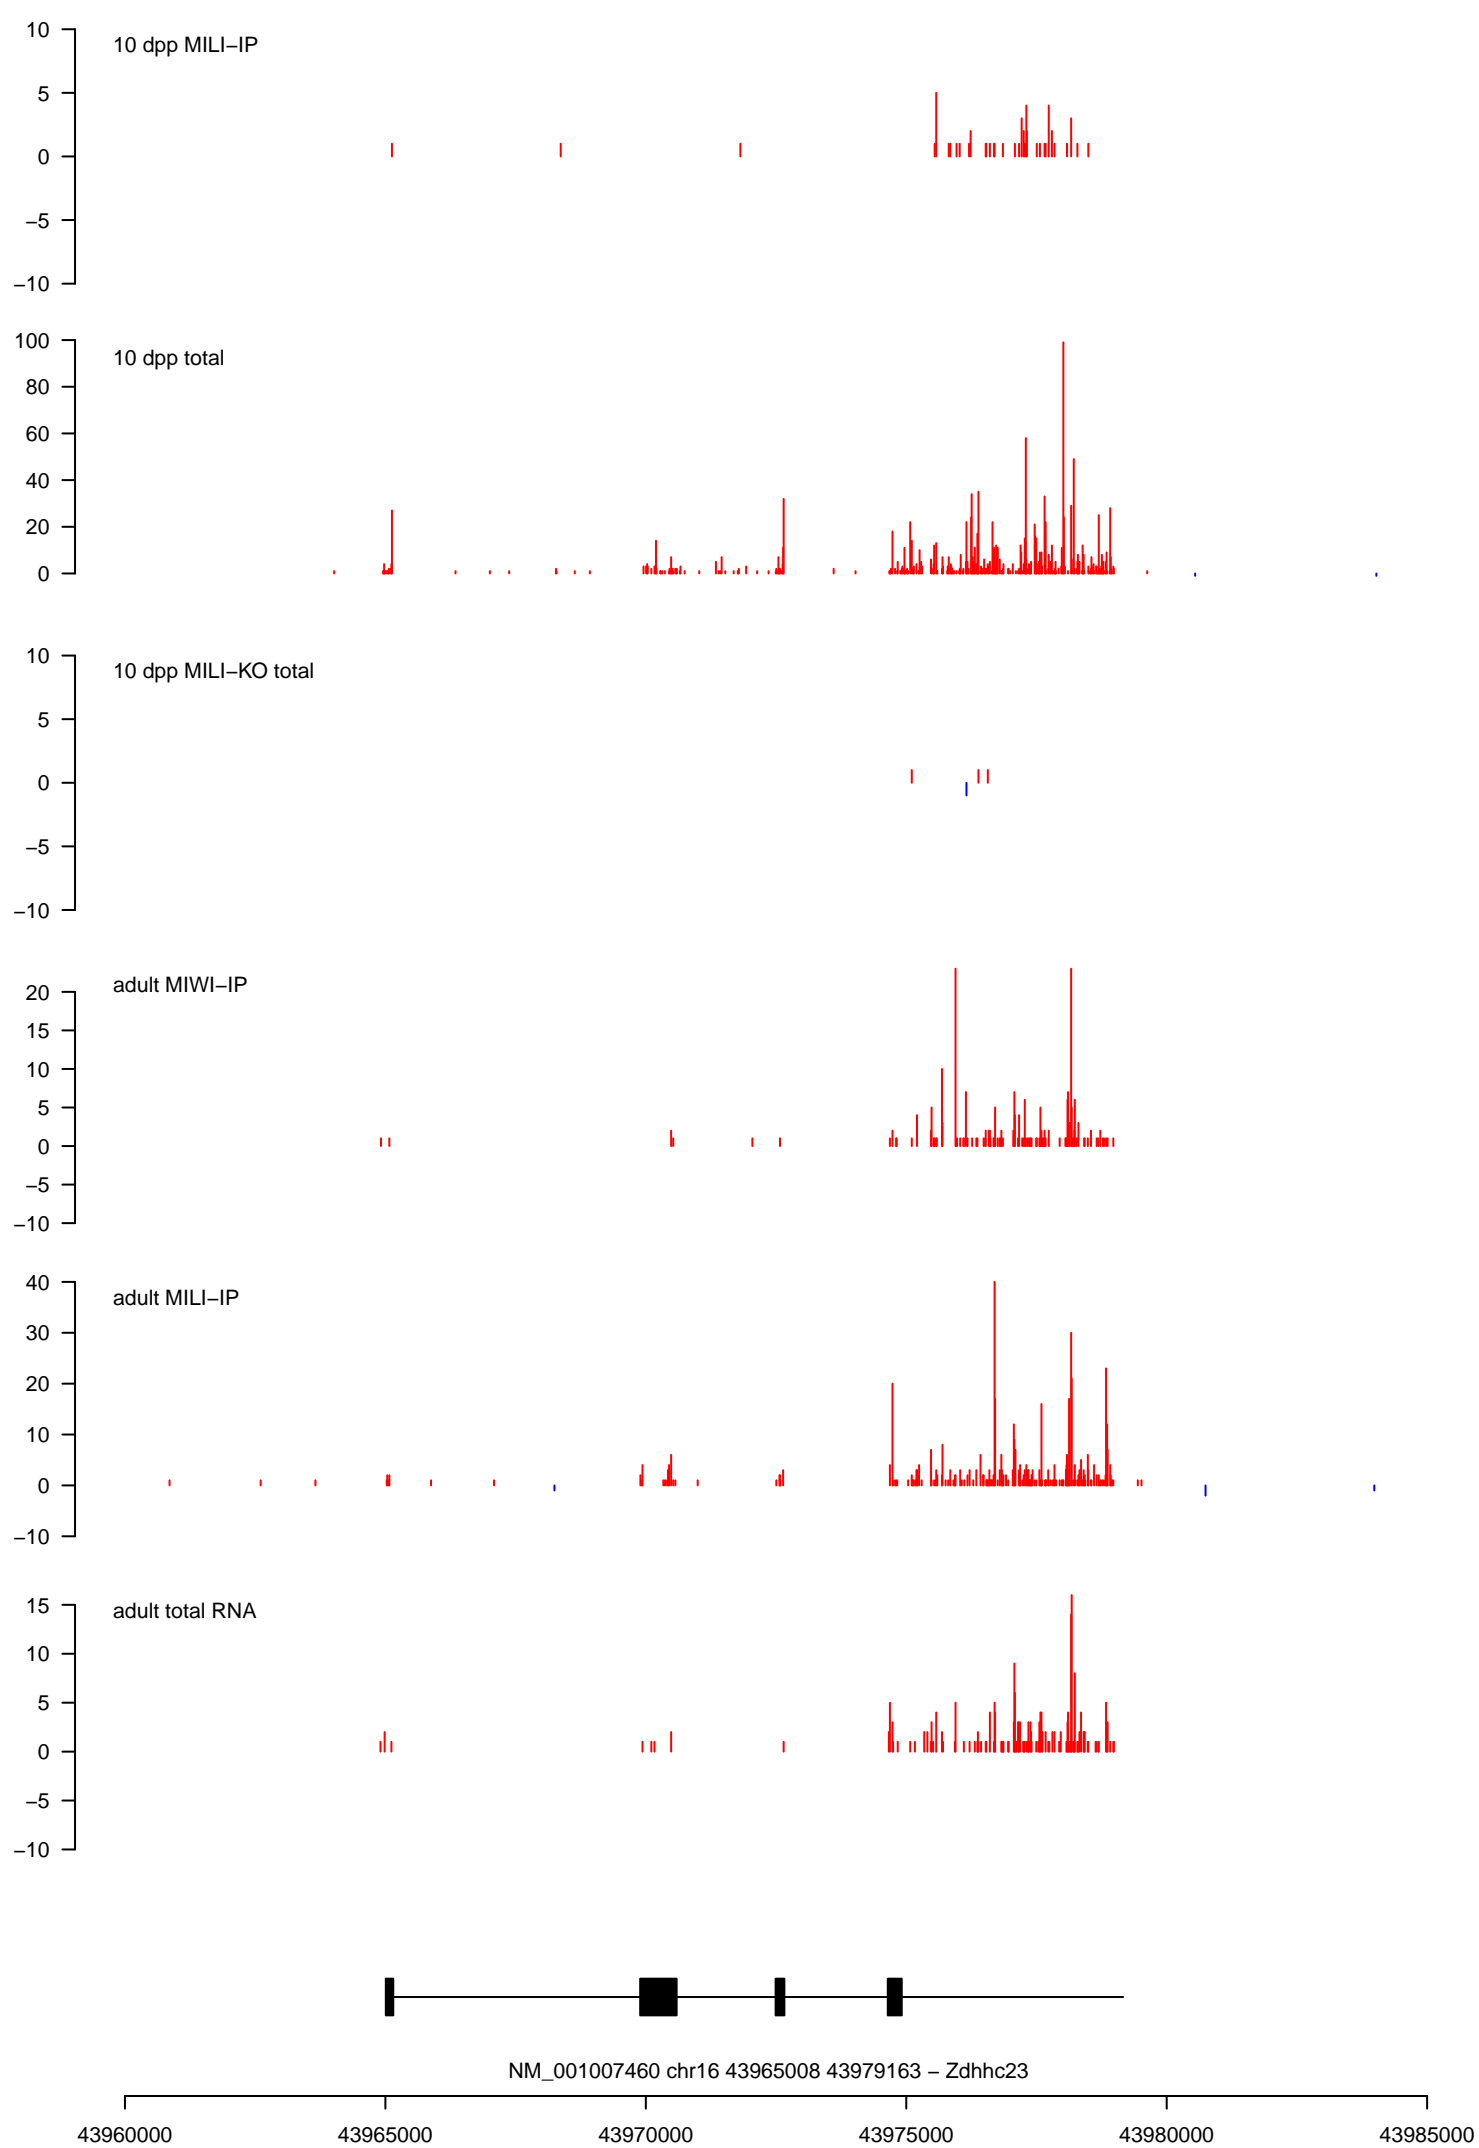

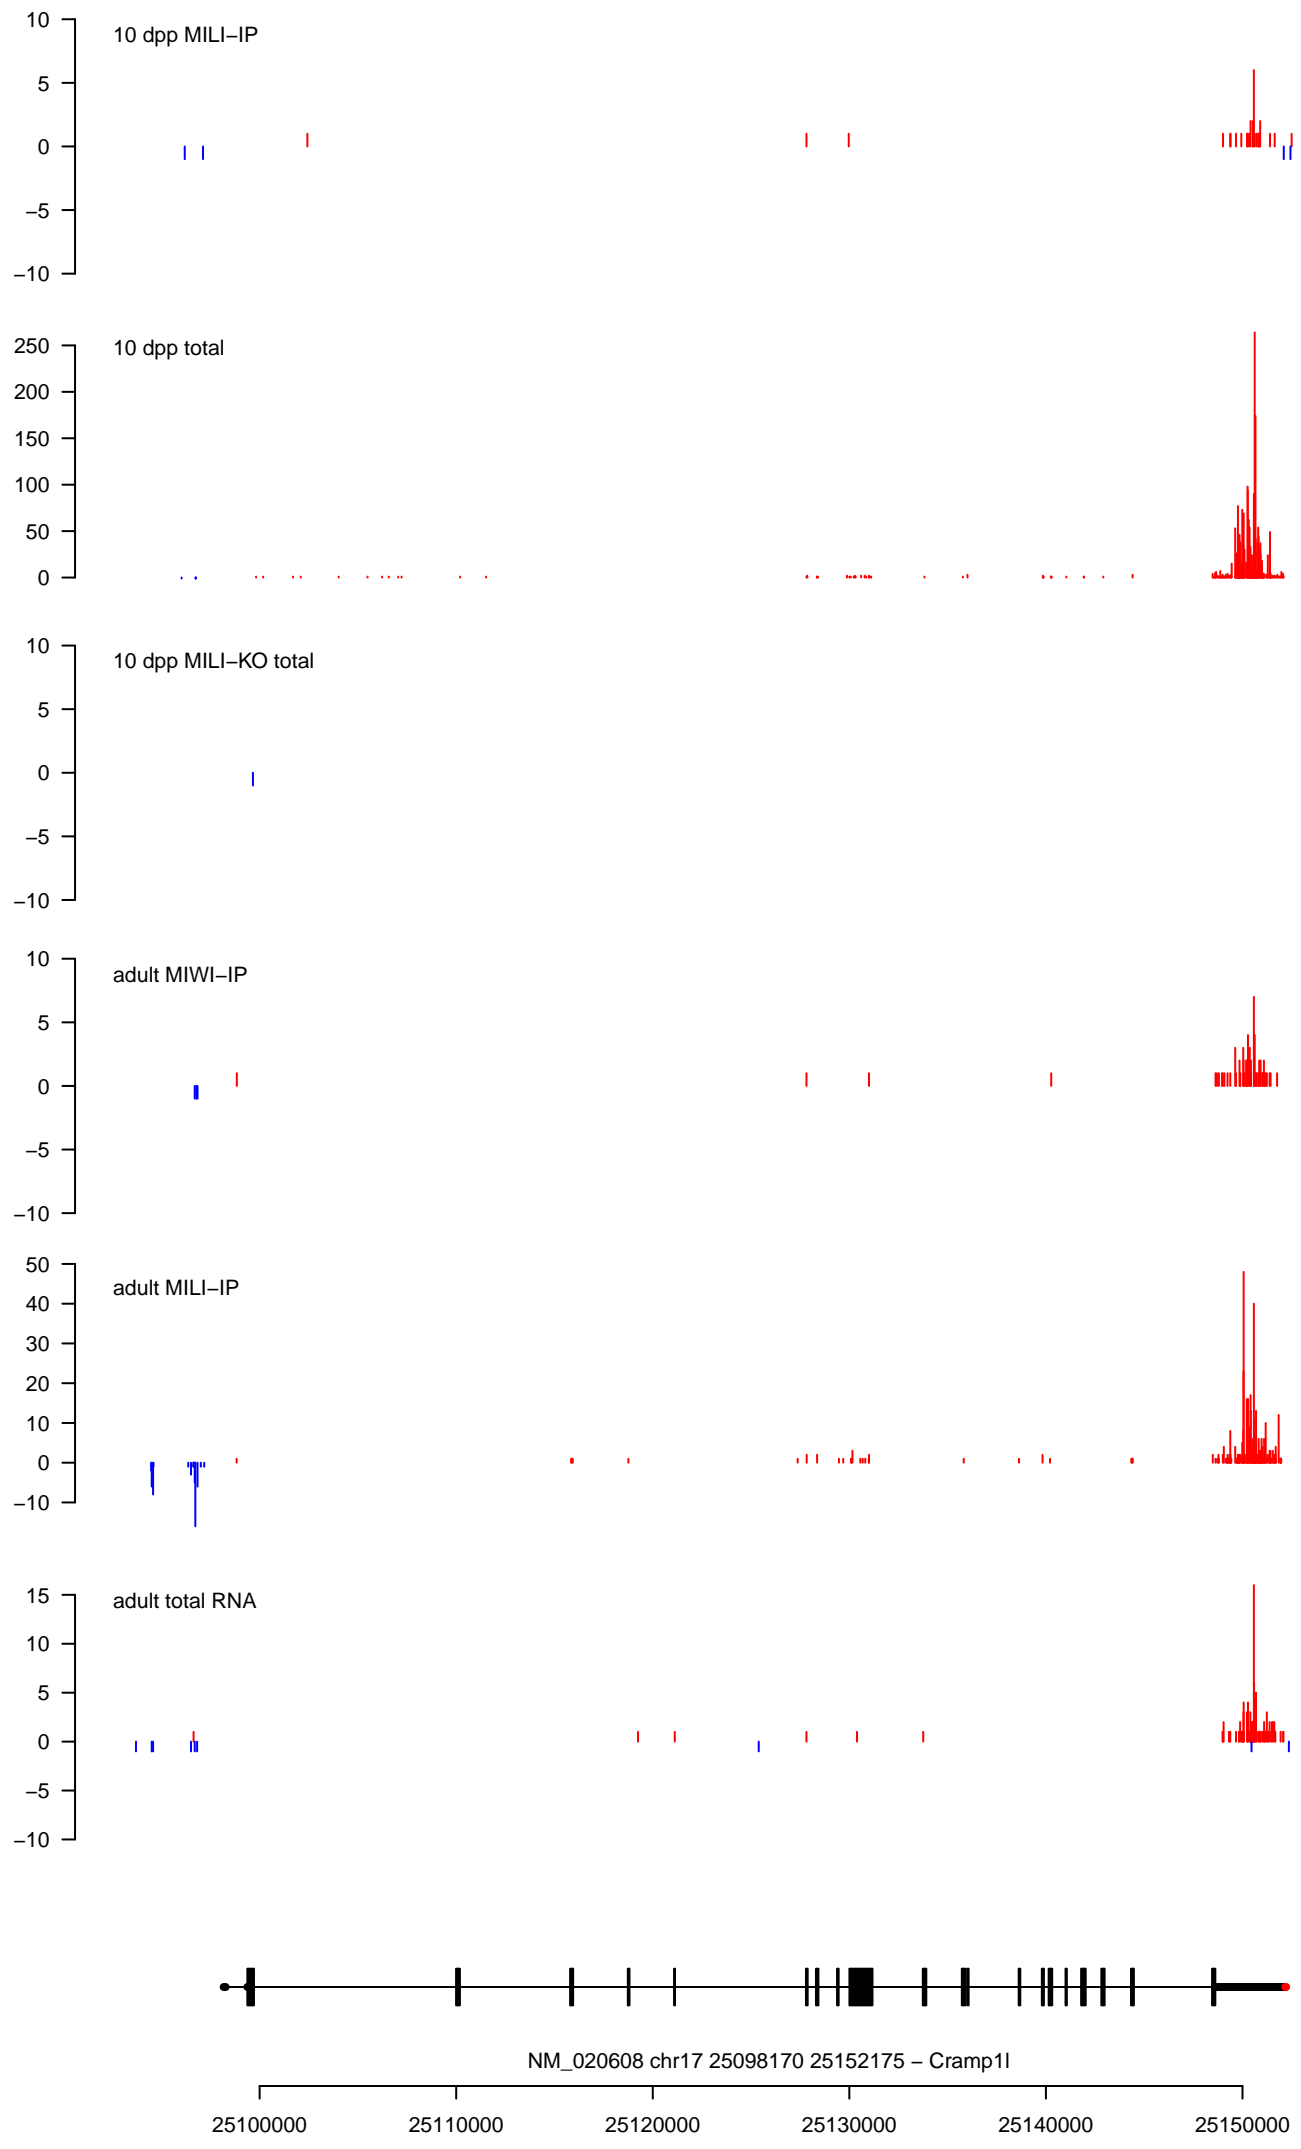

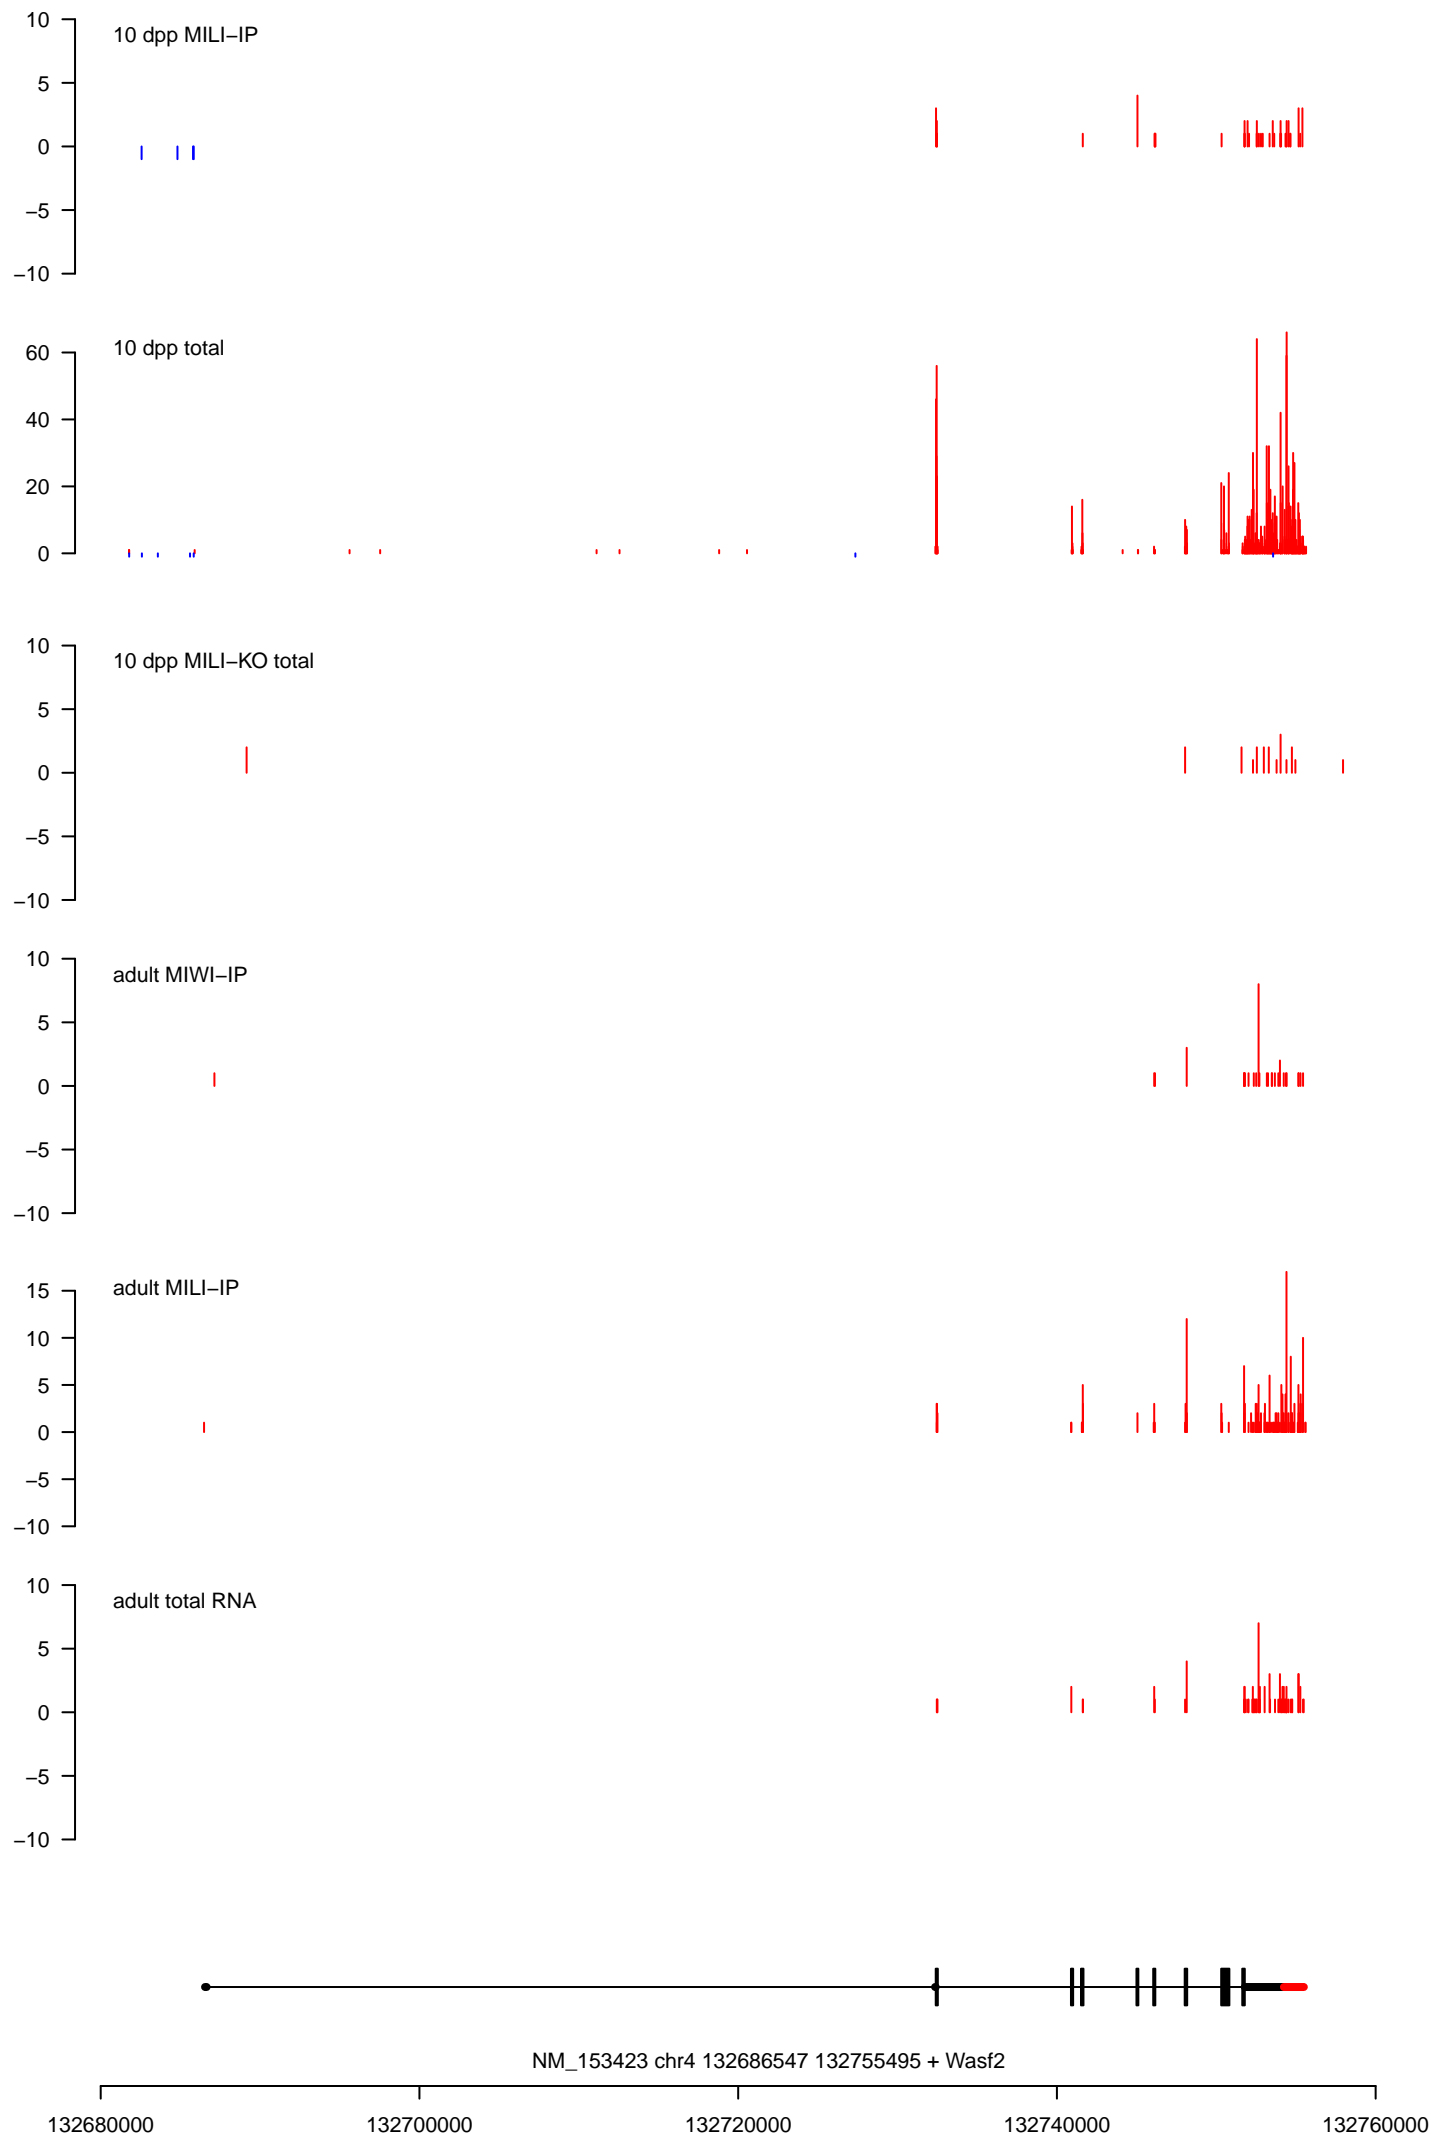

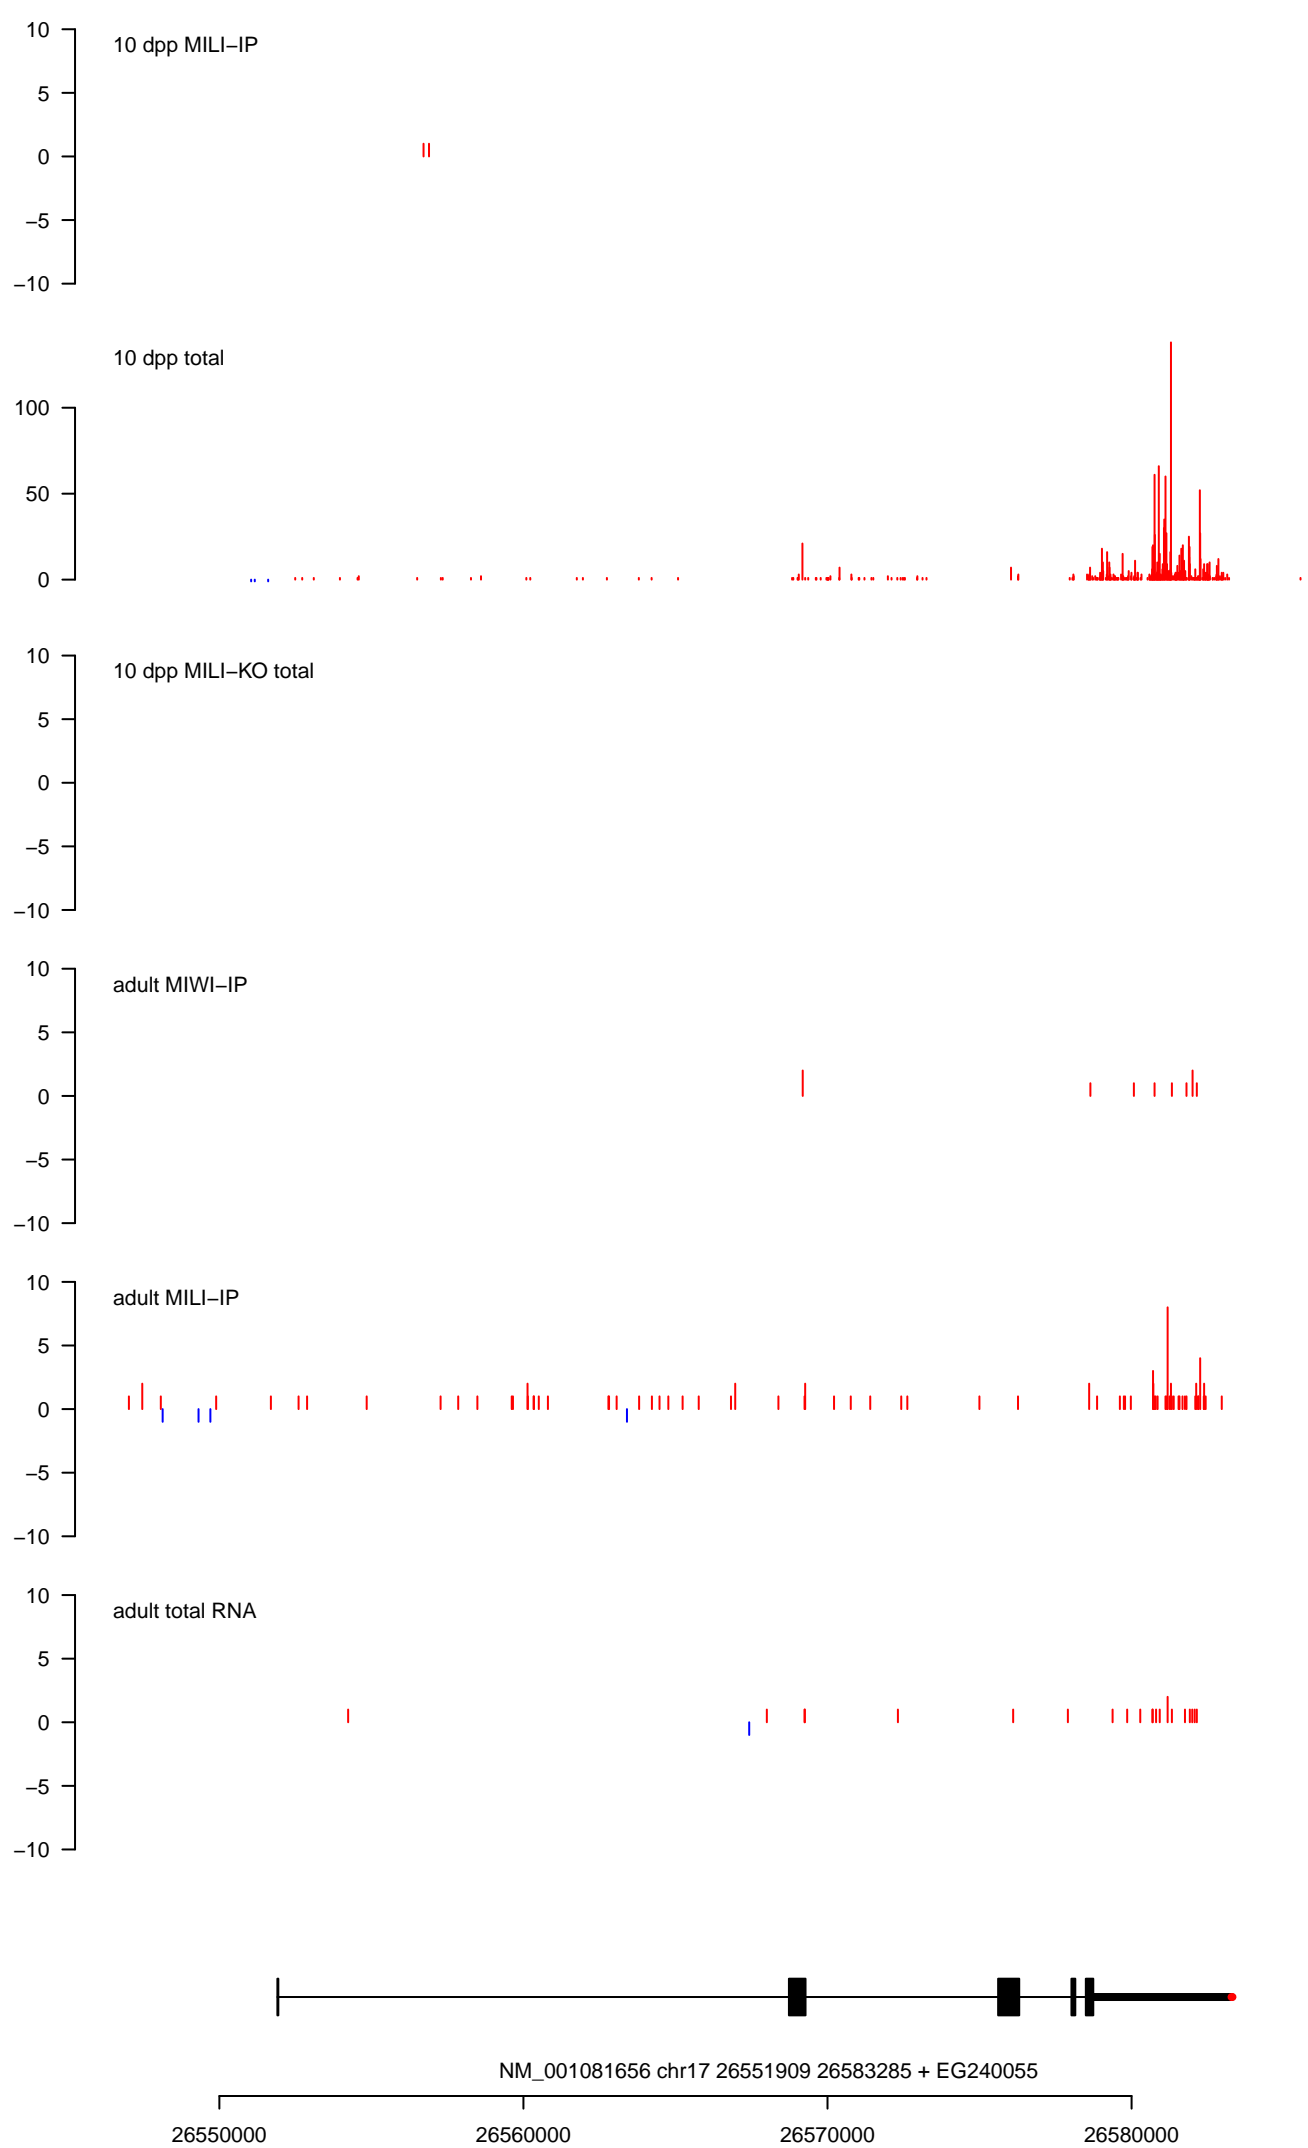



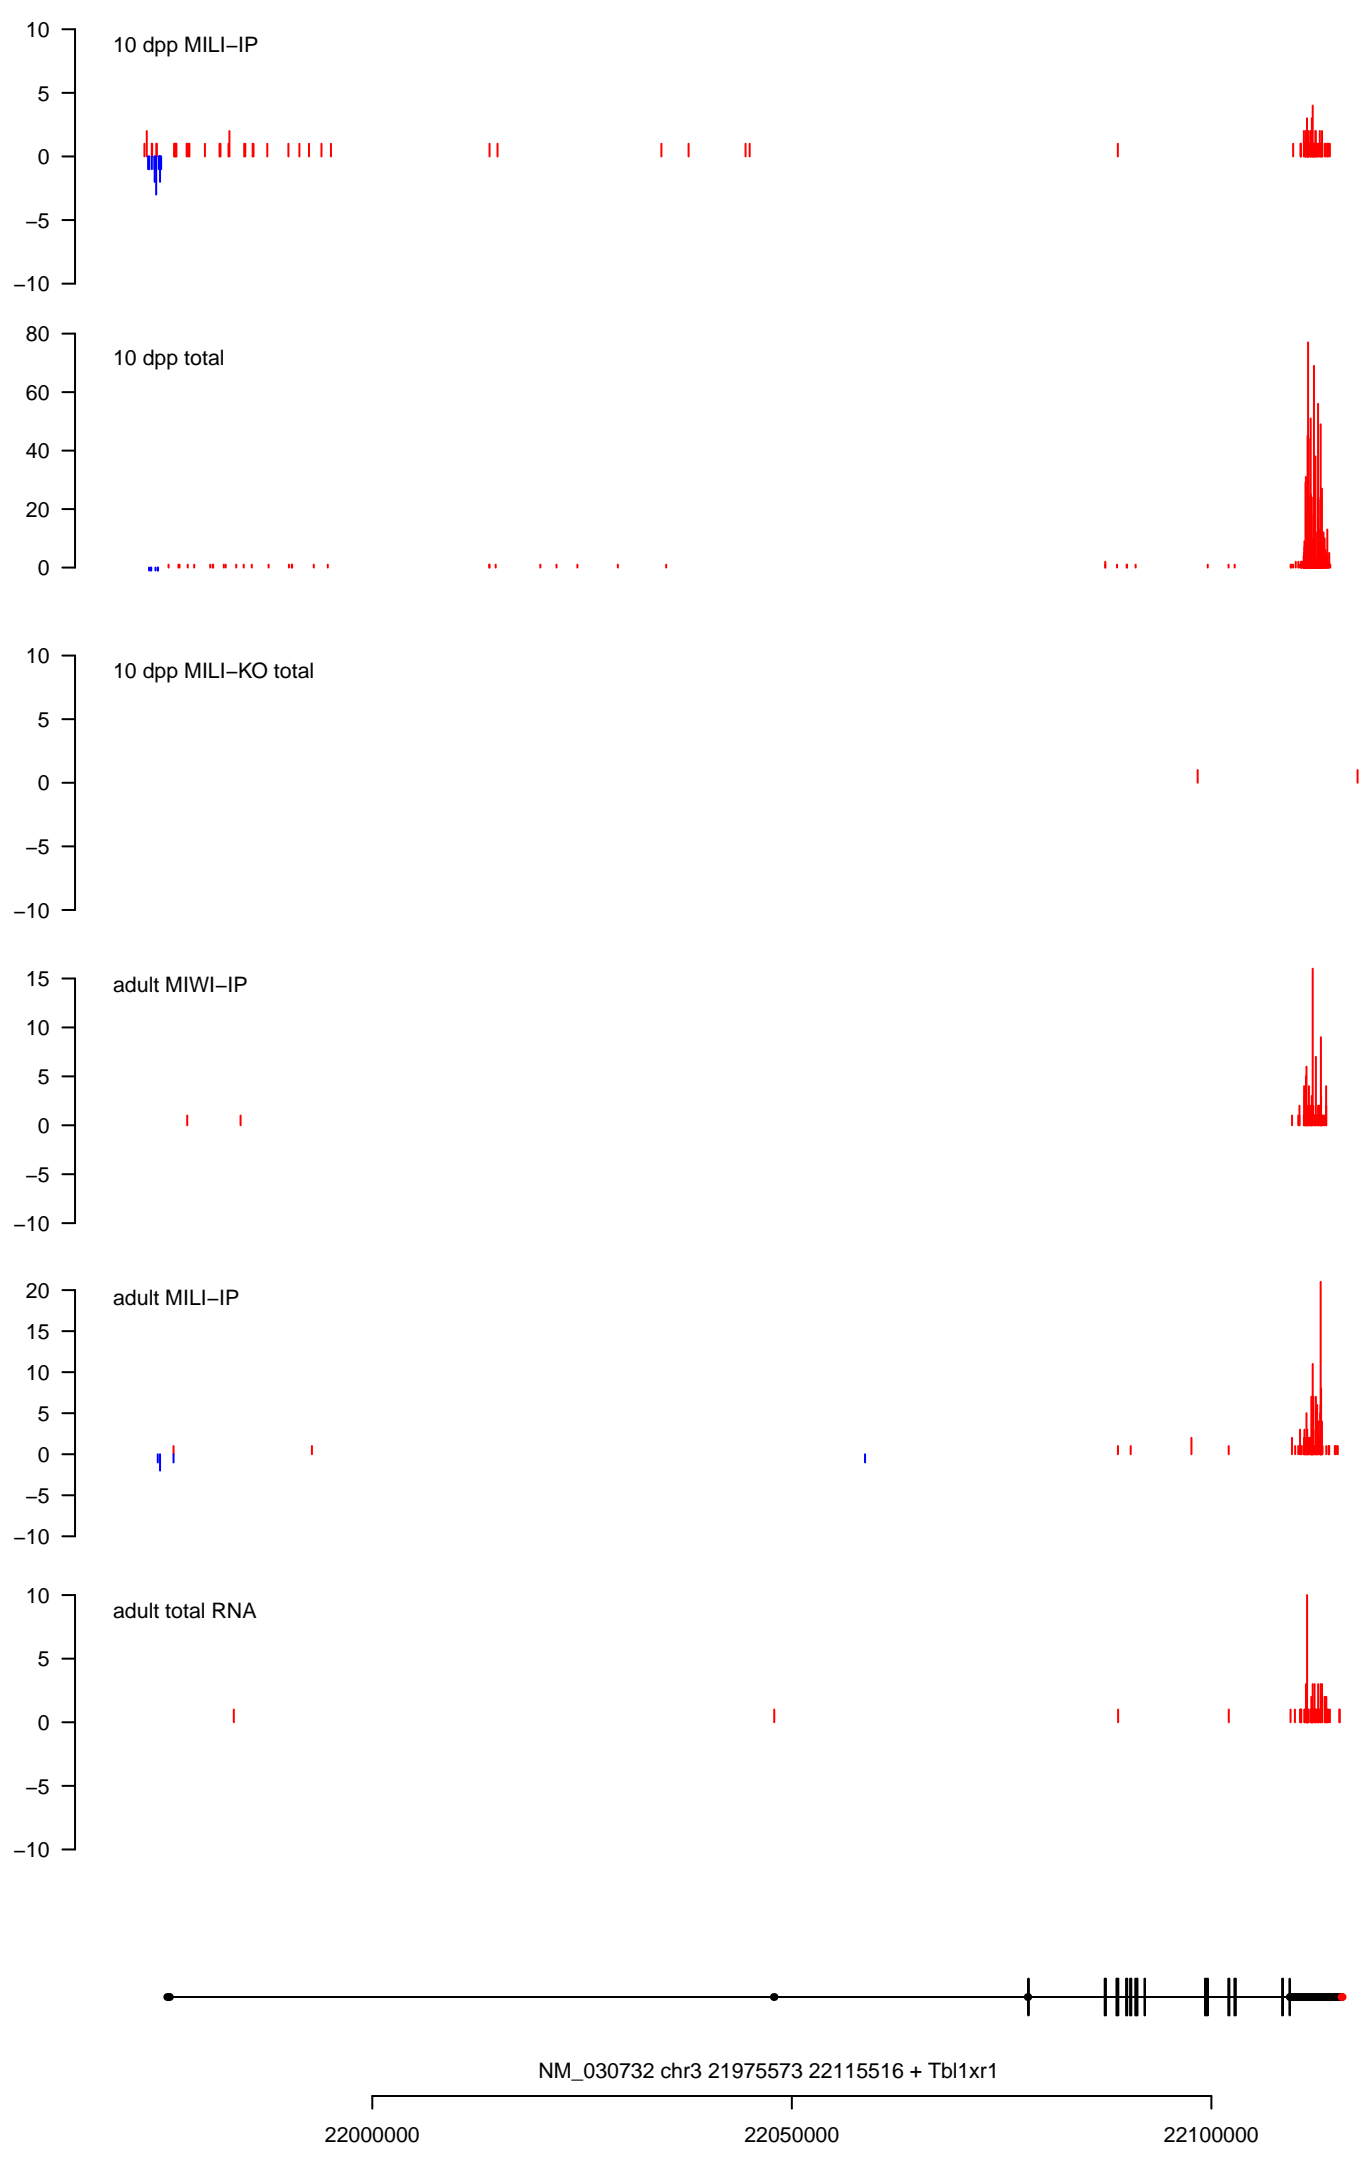

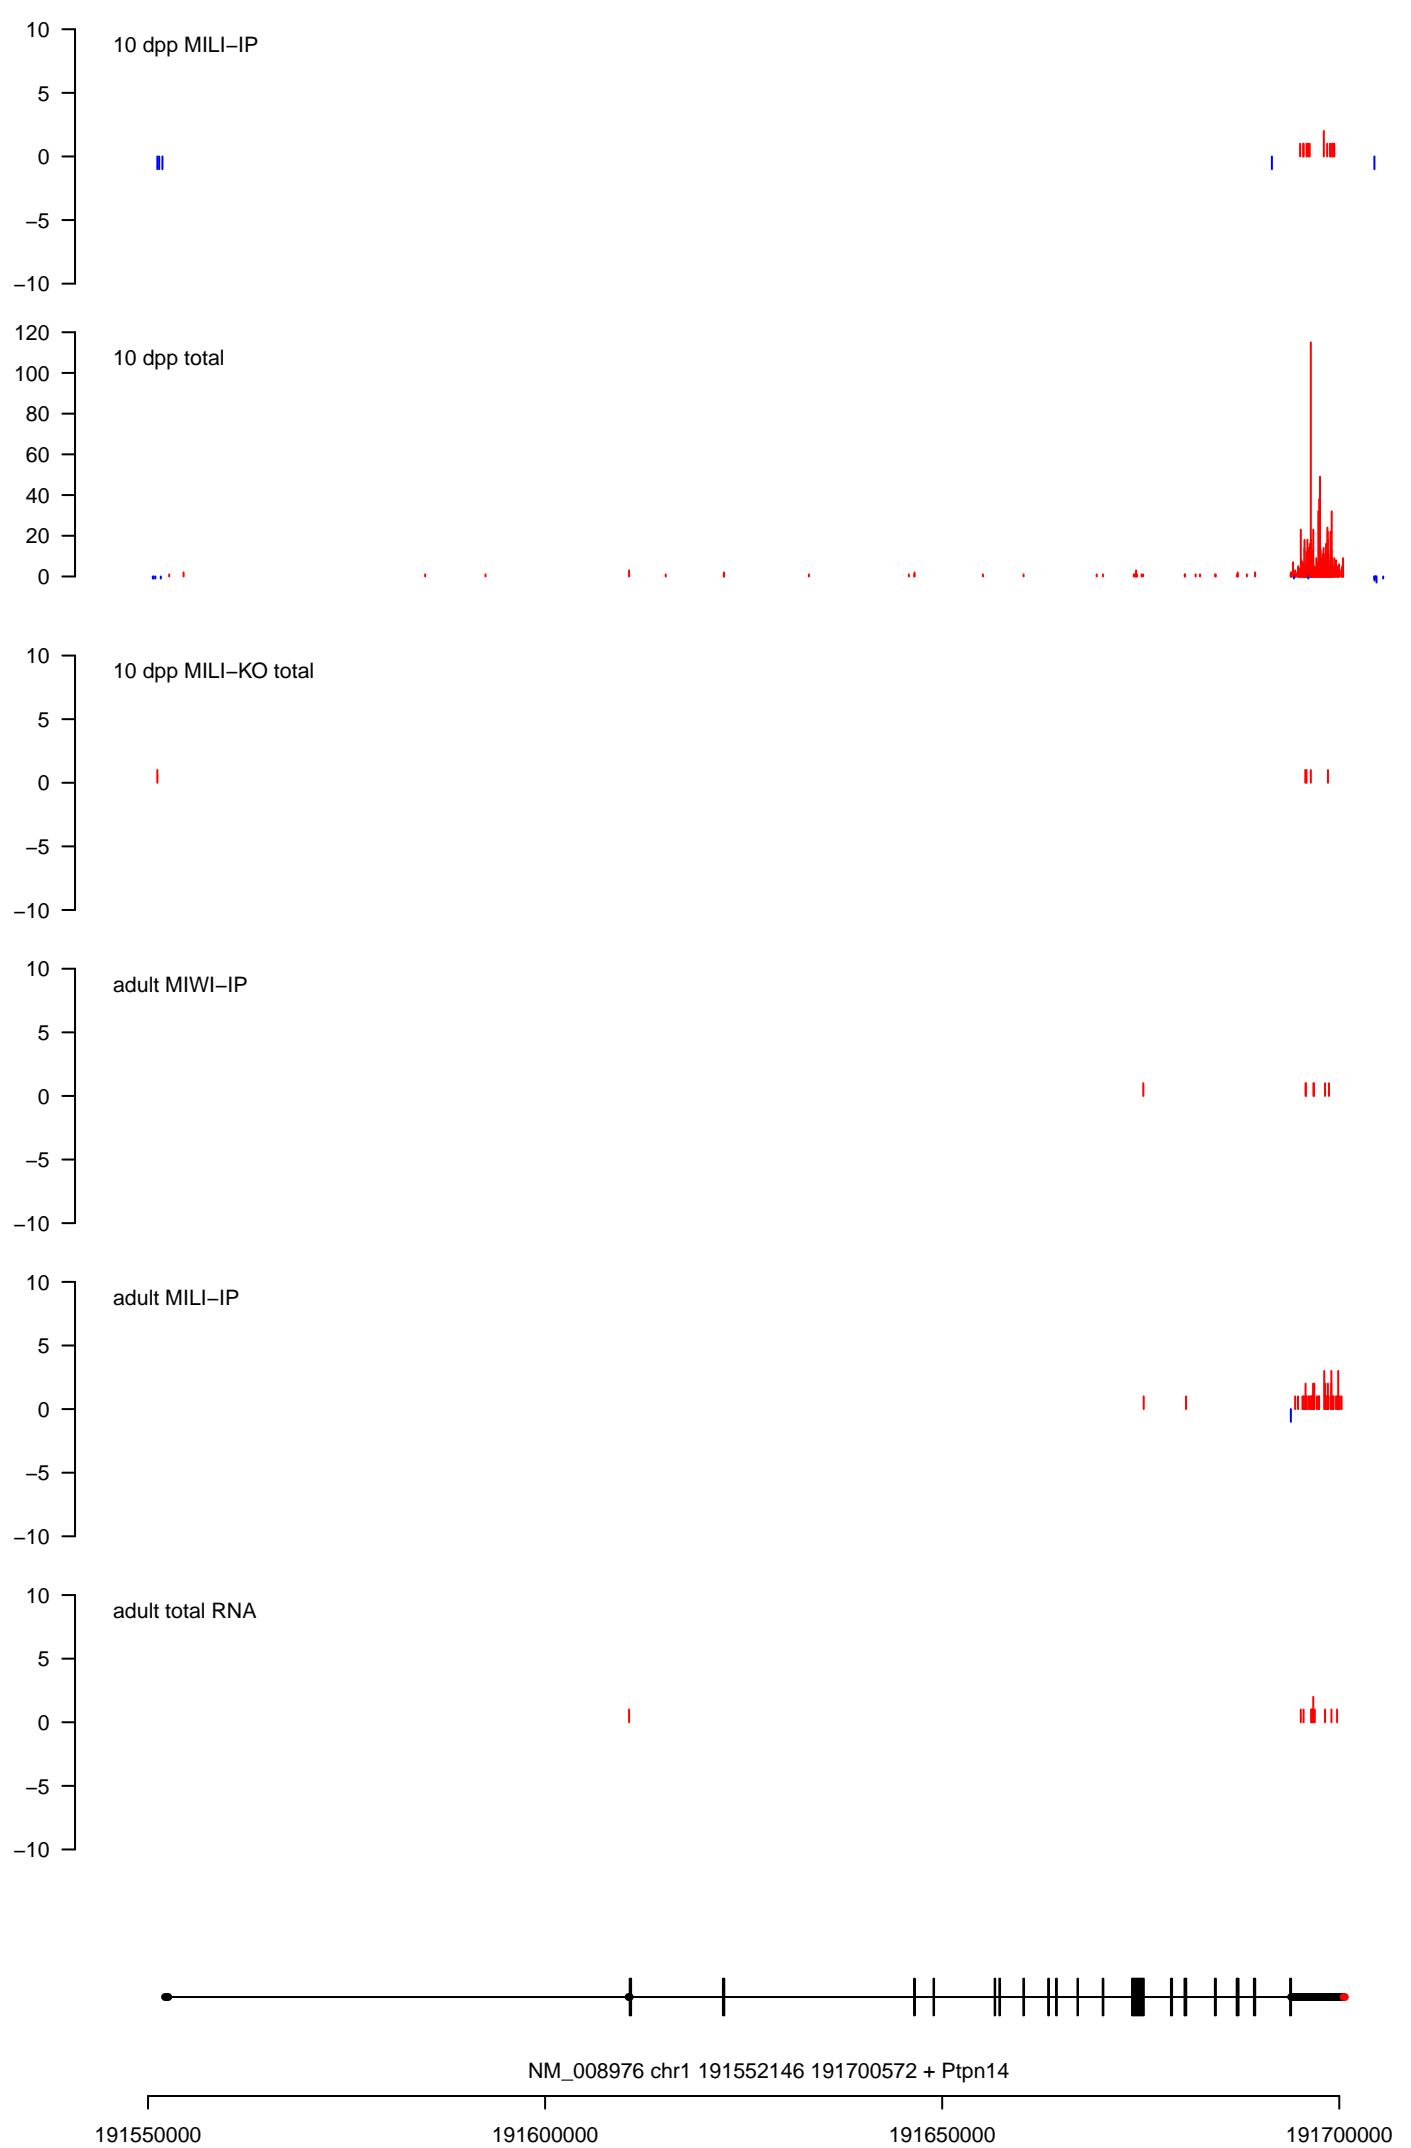

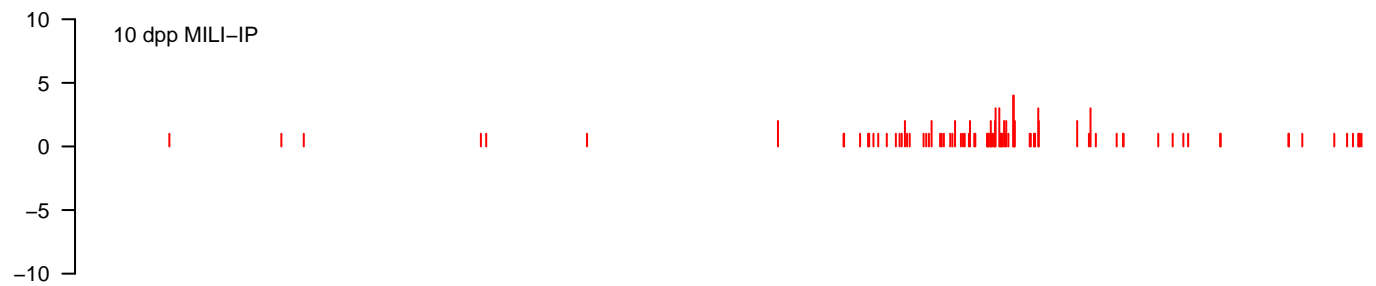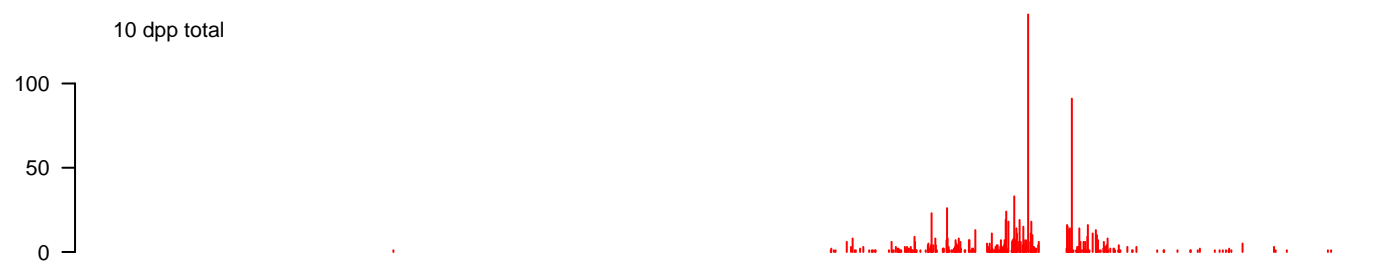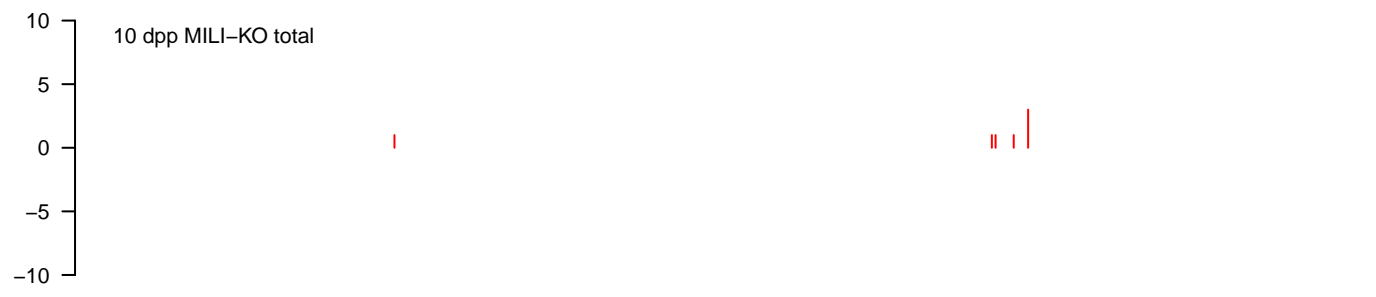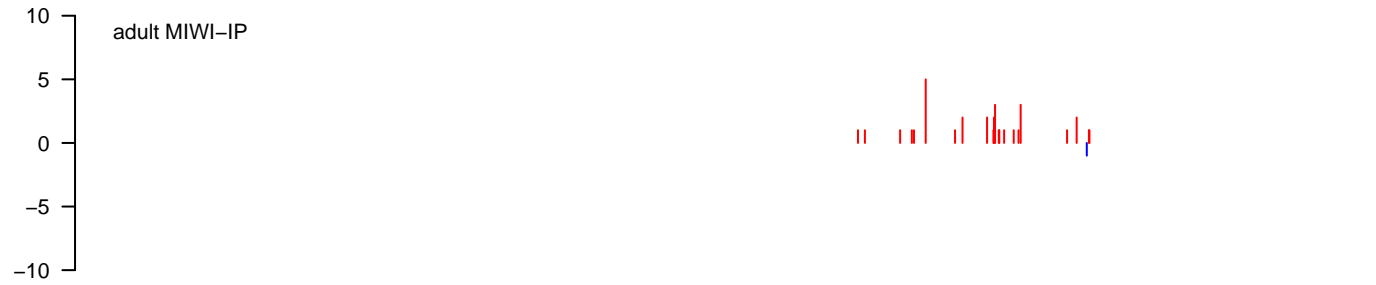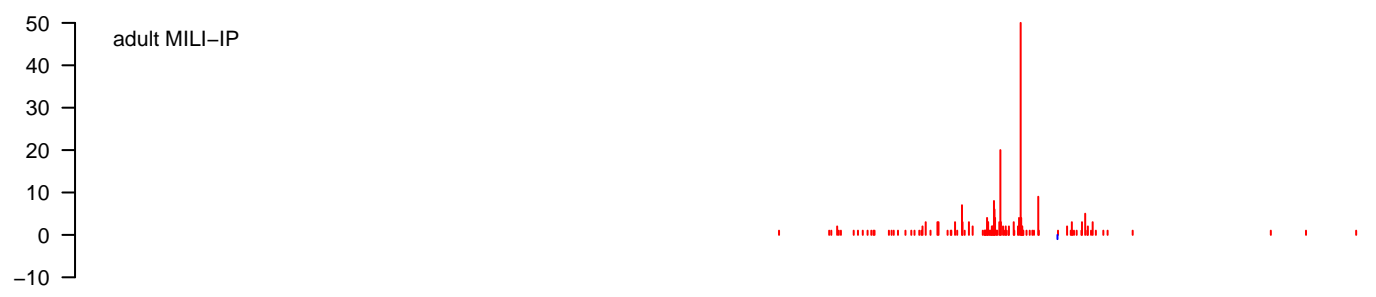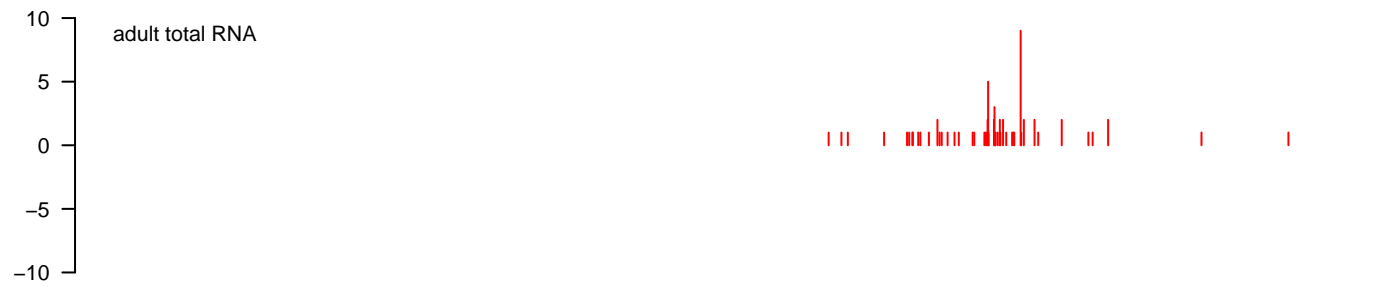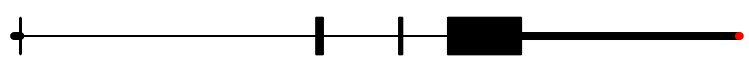

NM\_177899 chr8 72285222 72298810 - D330038O06Rik

72280000 72285000 72290000 72295000 72300000

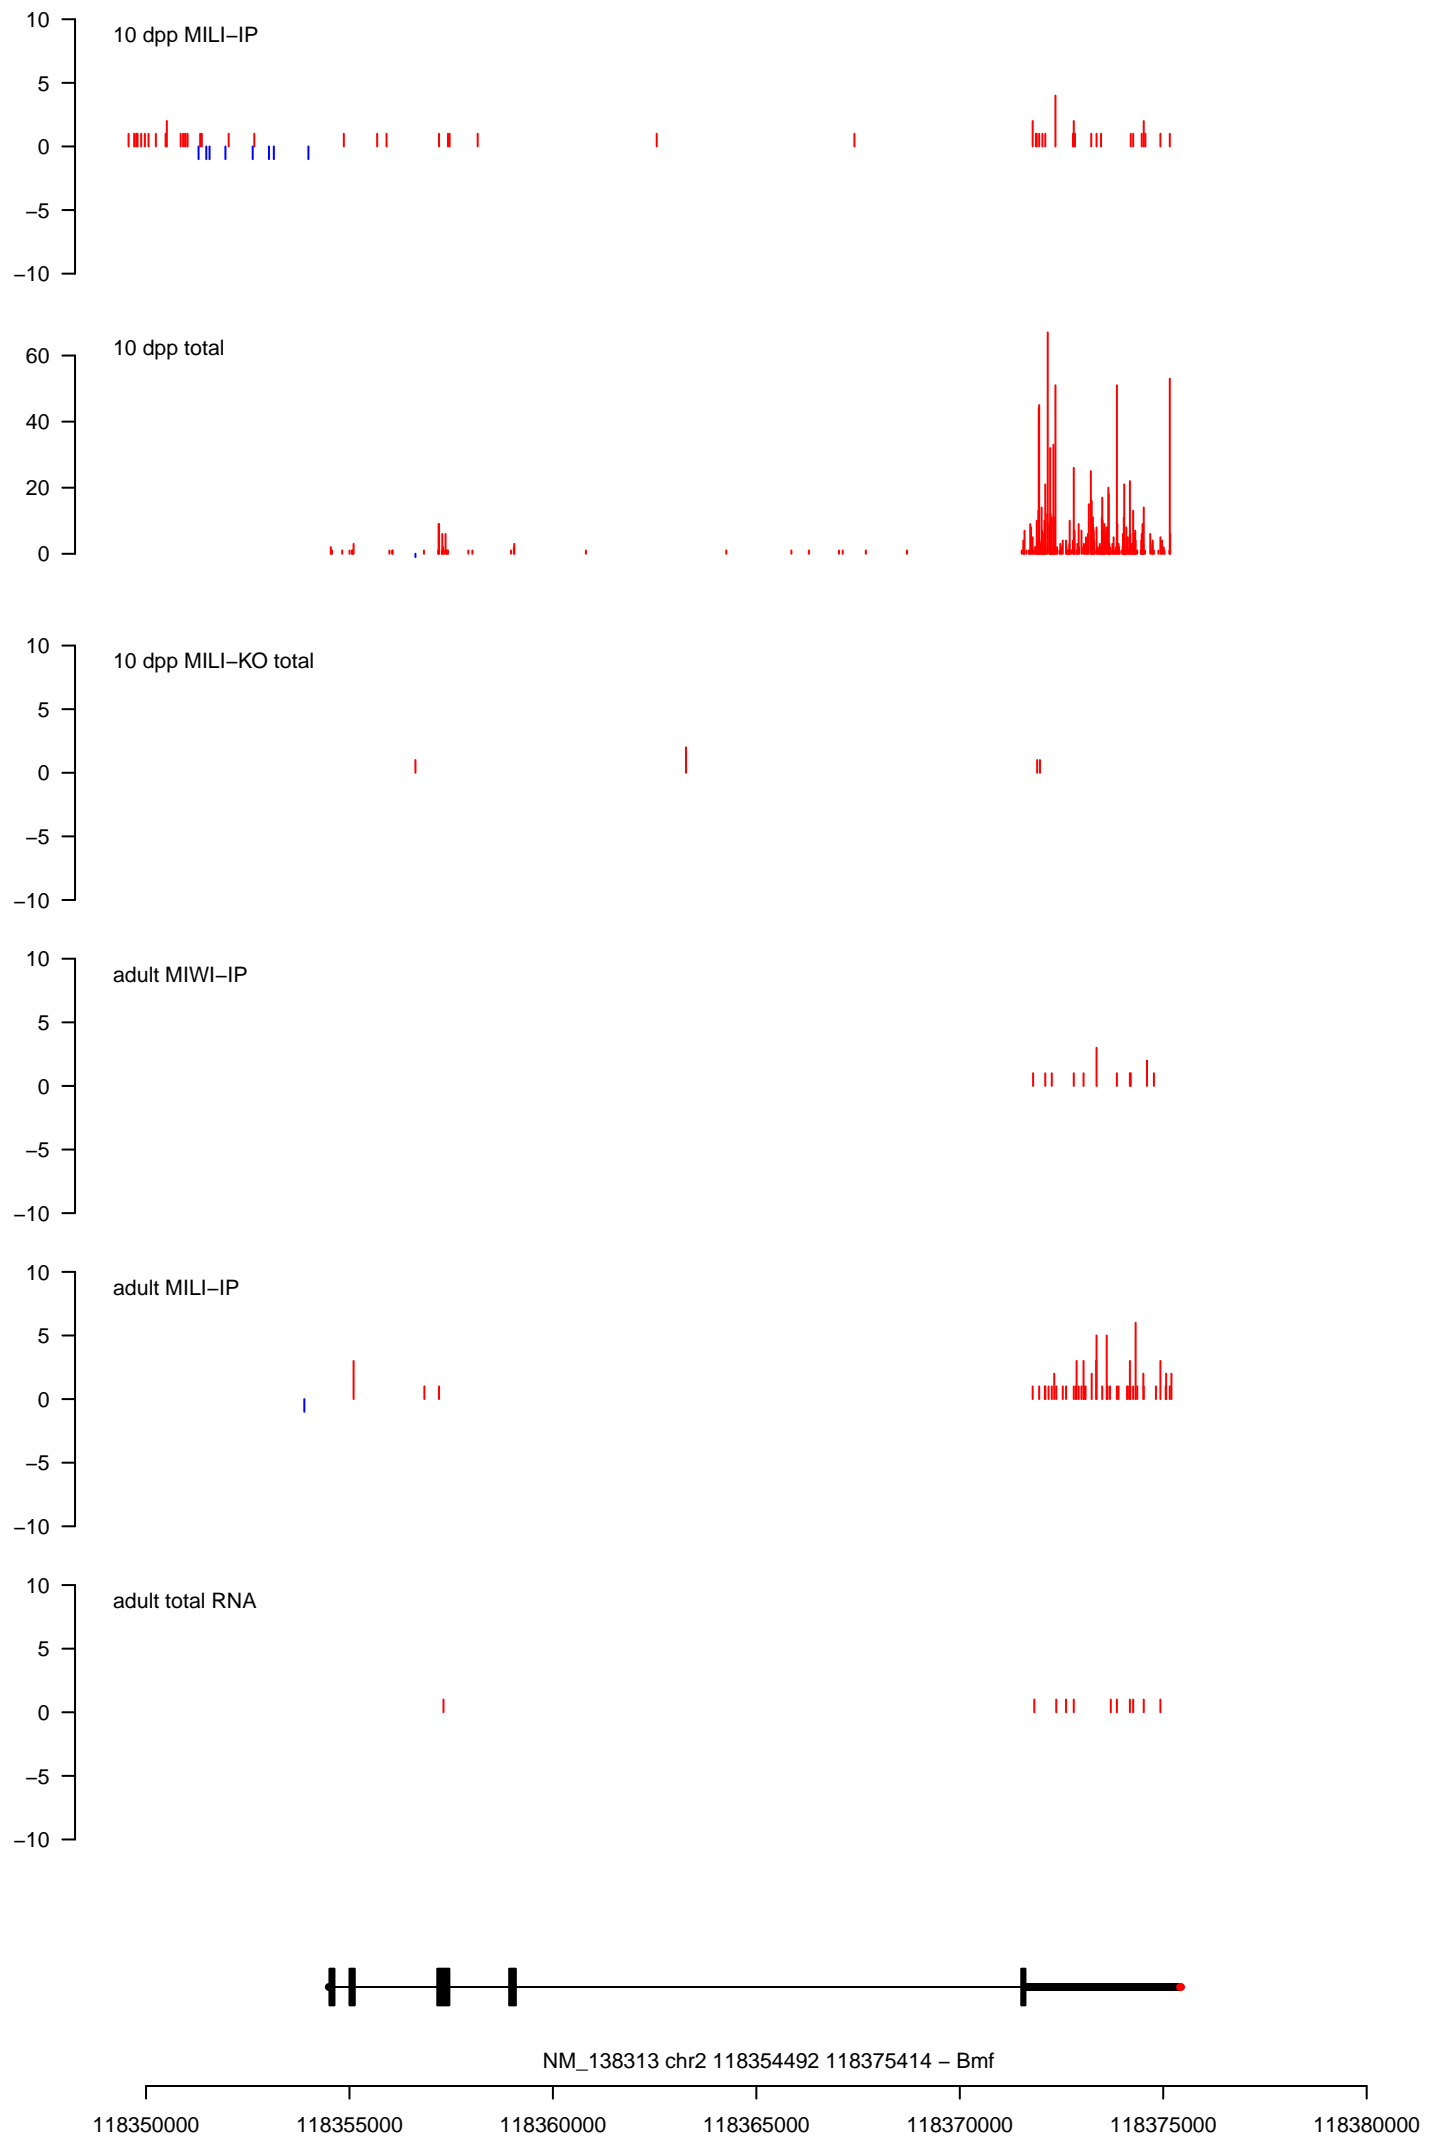

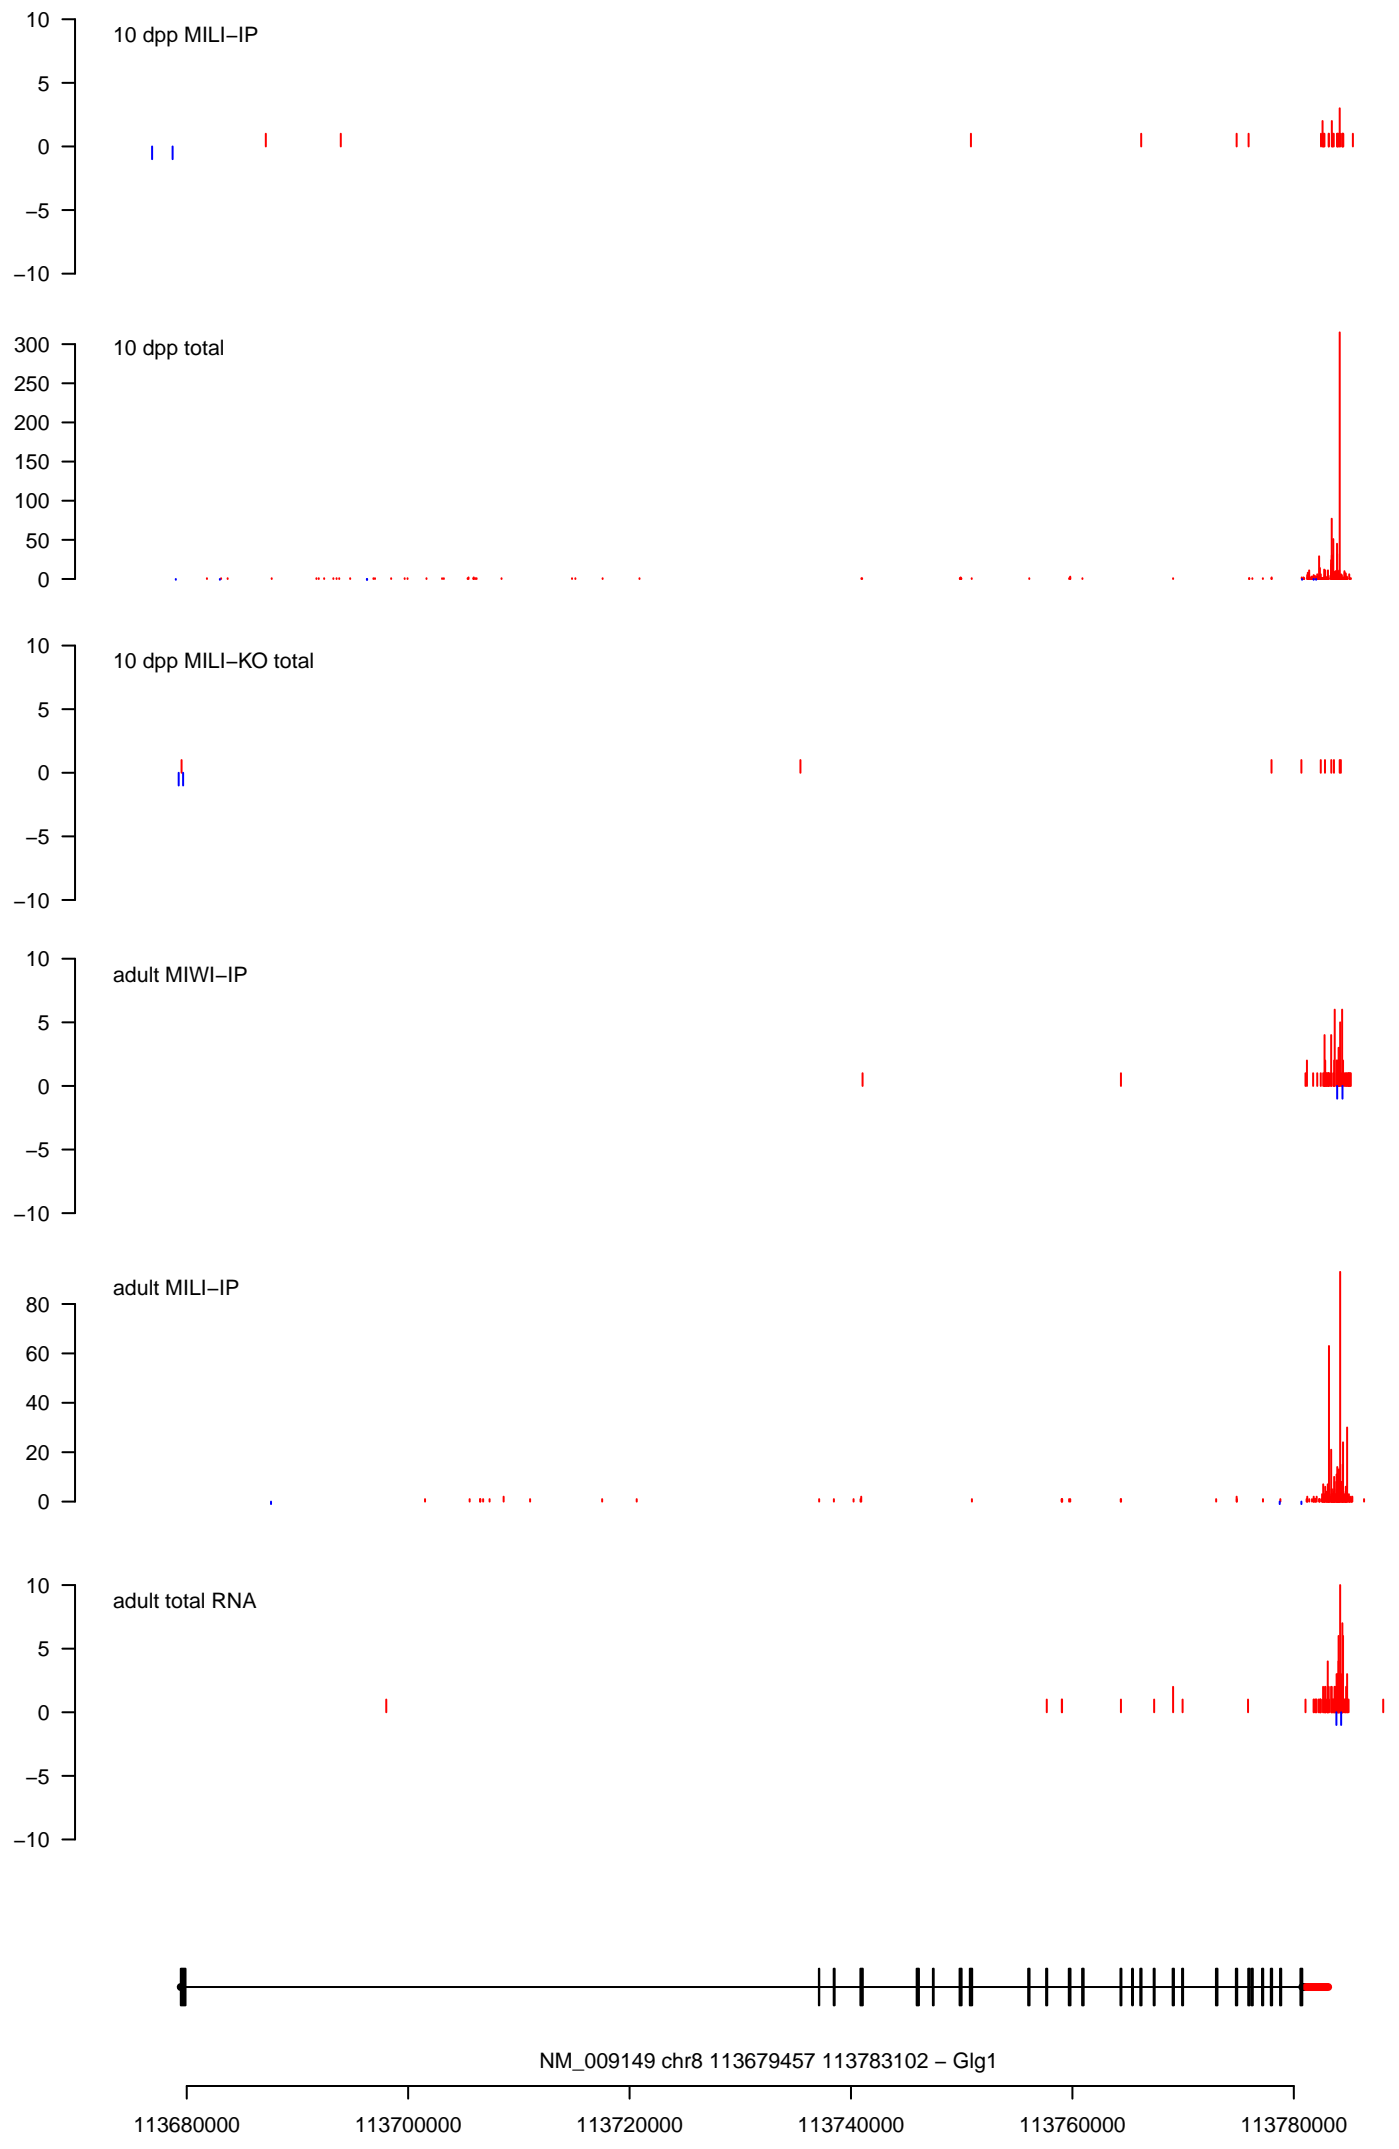

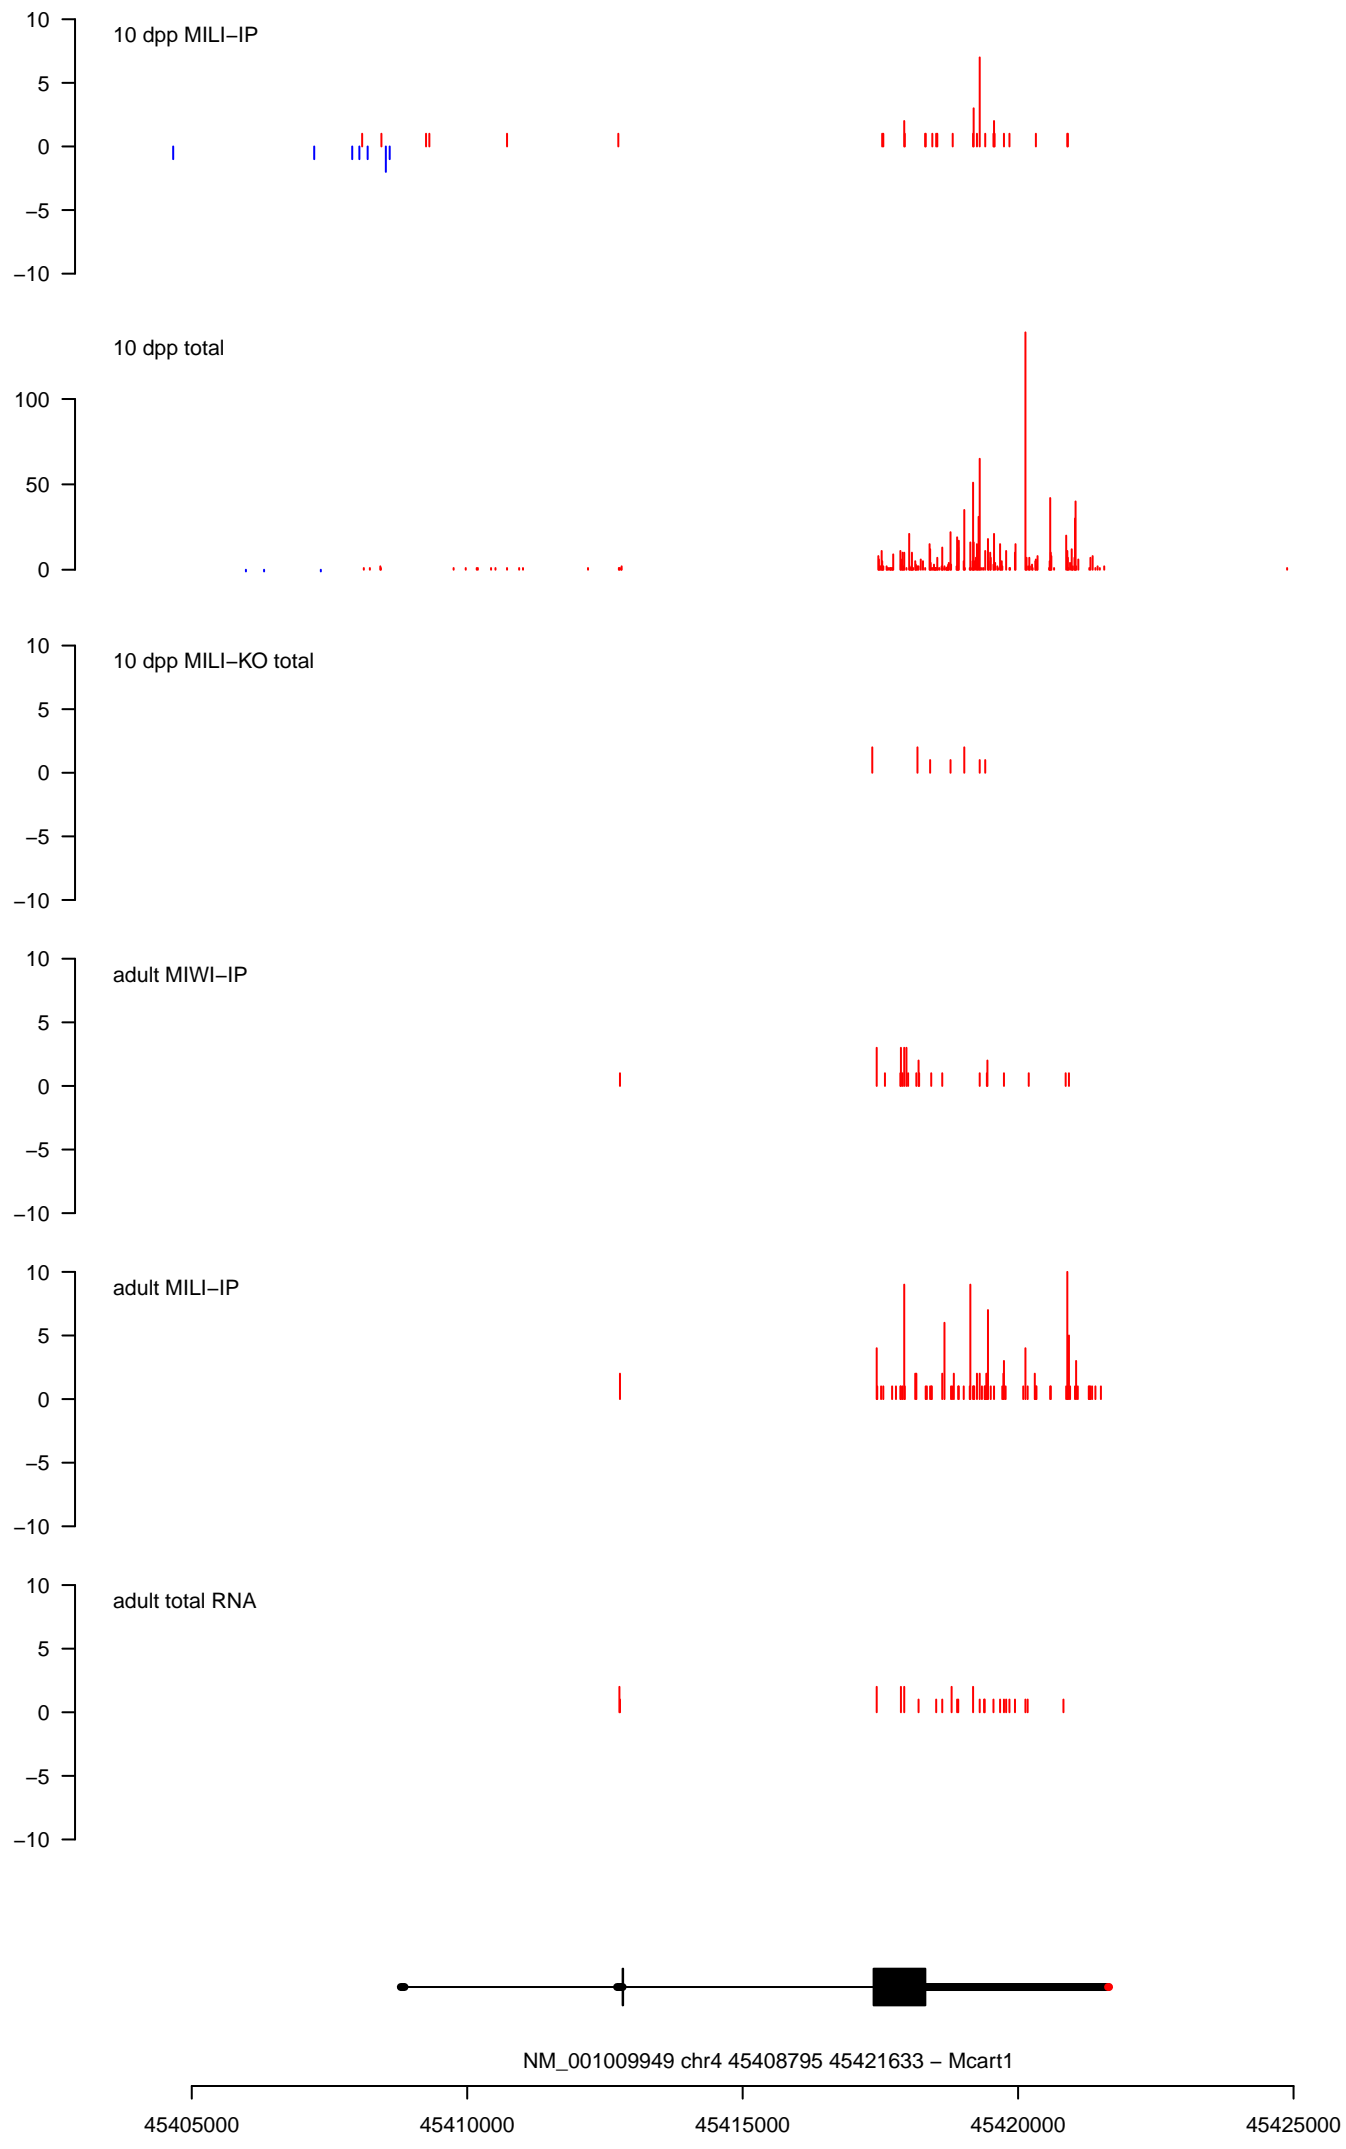

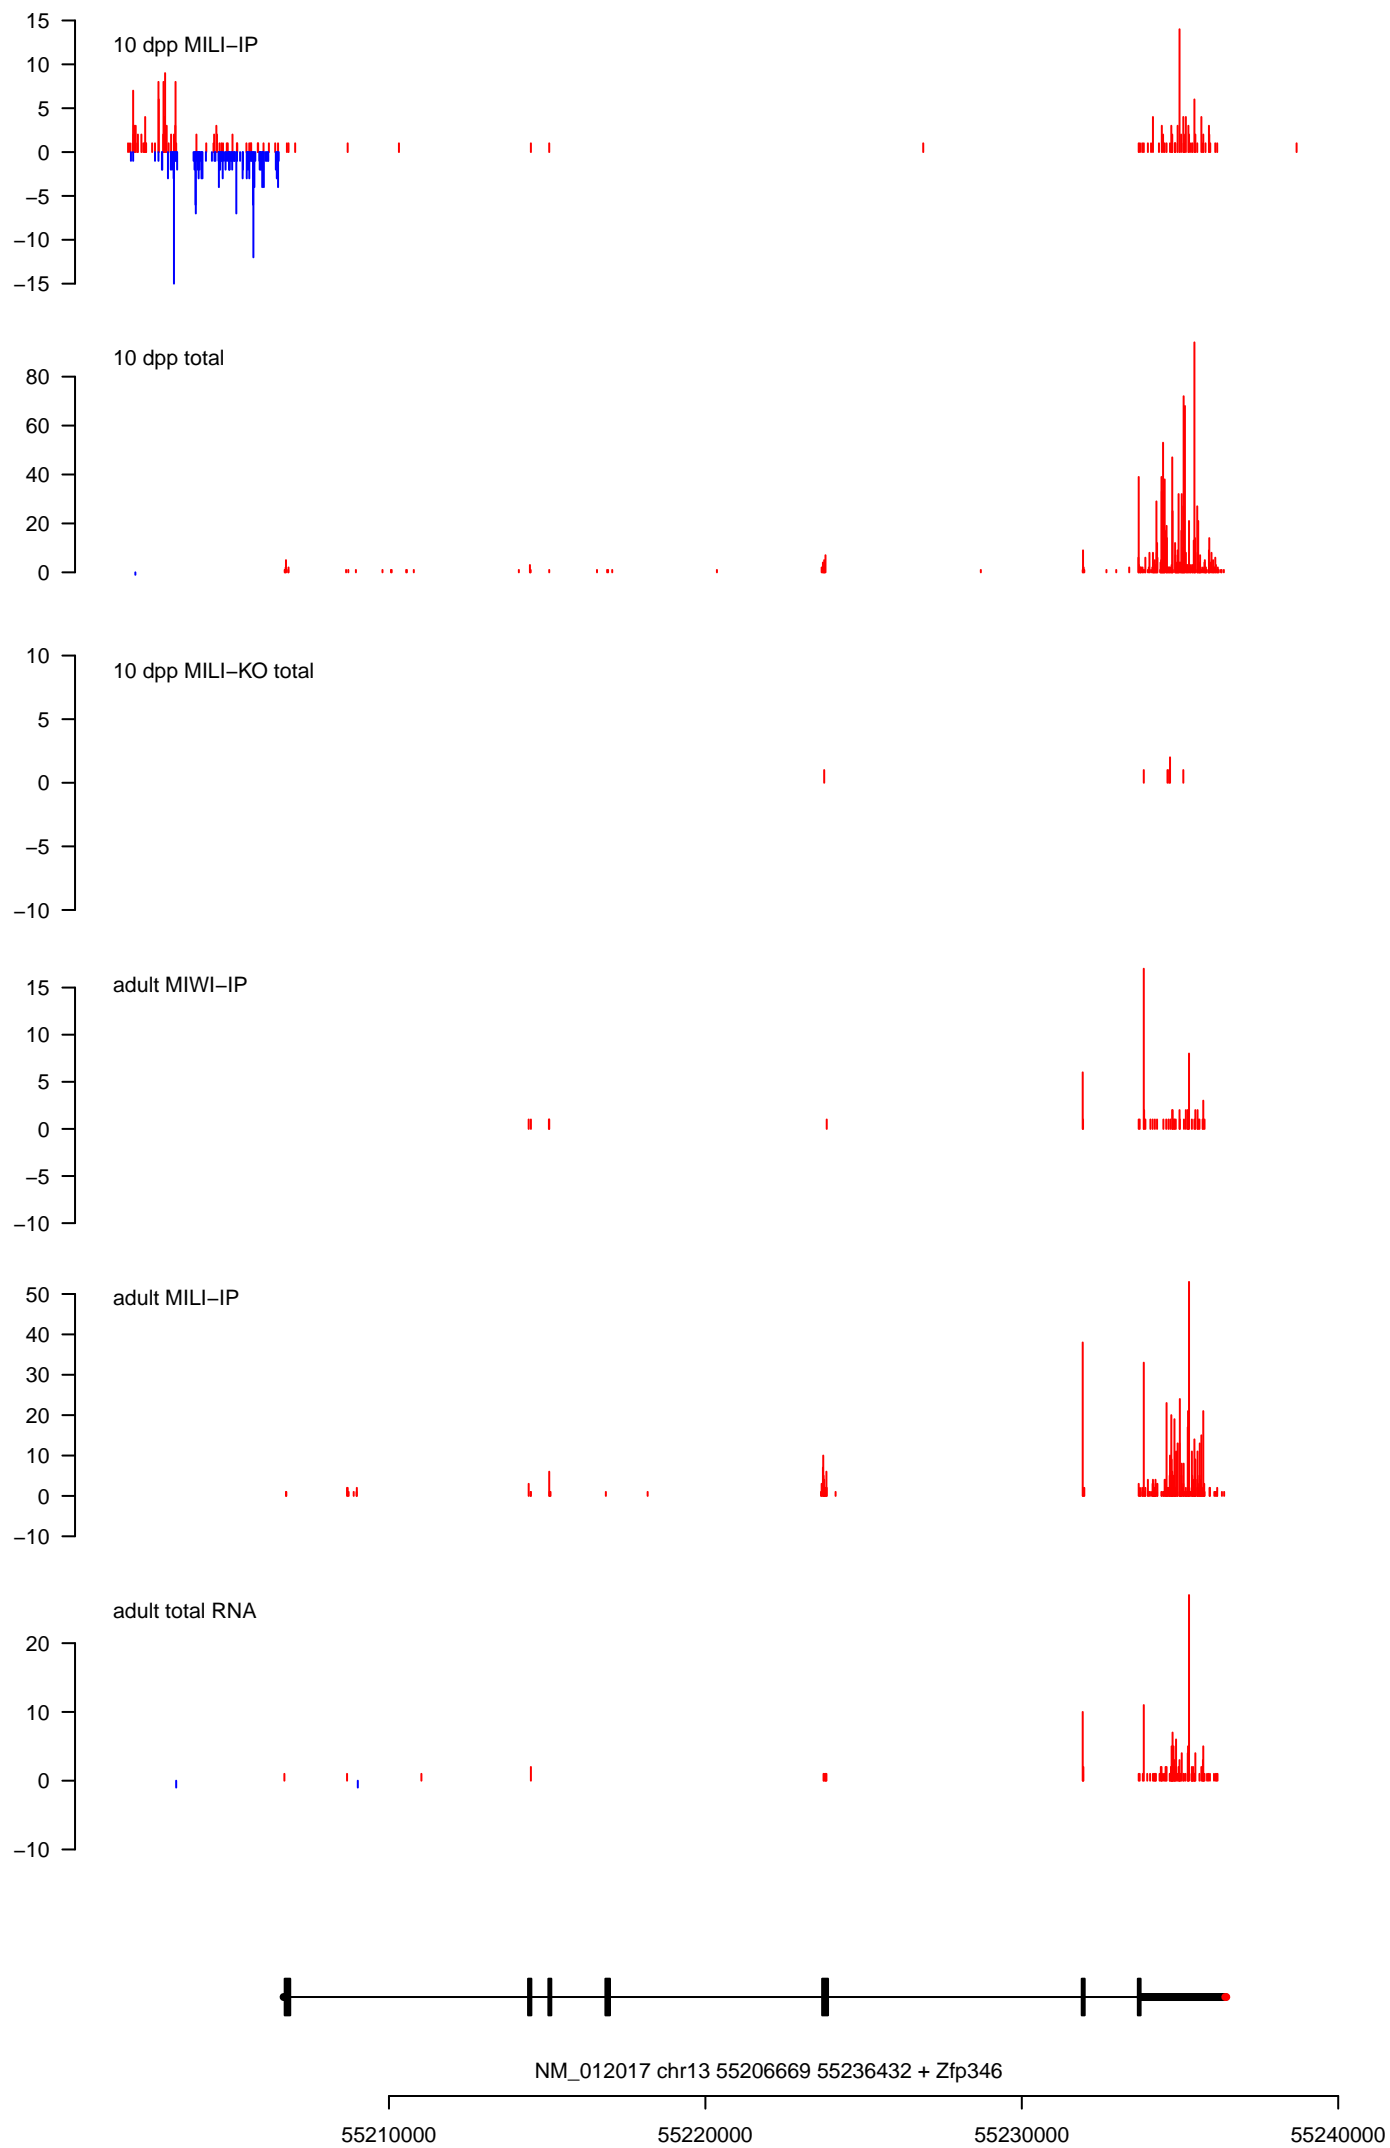

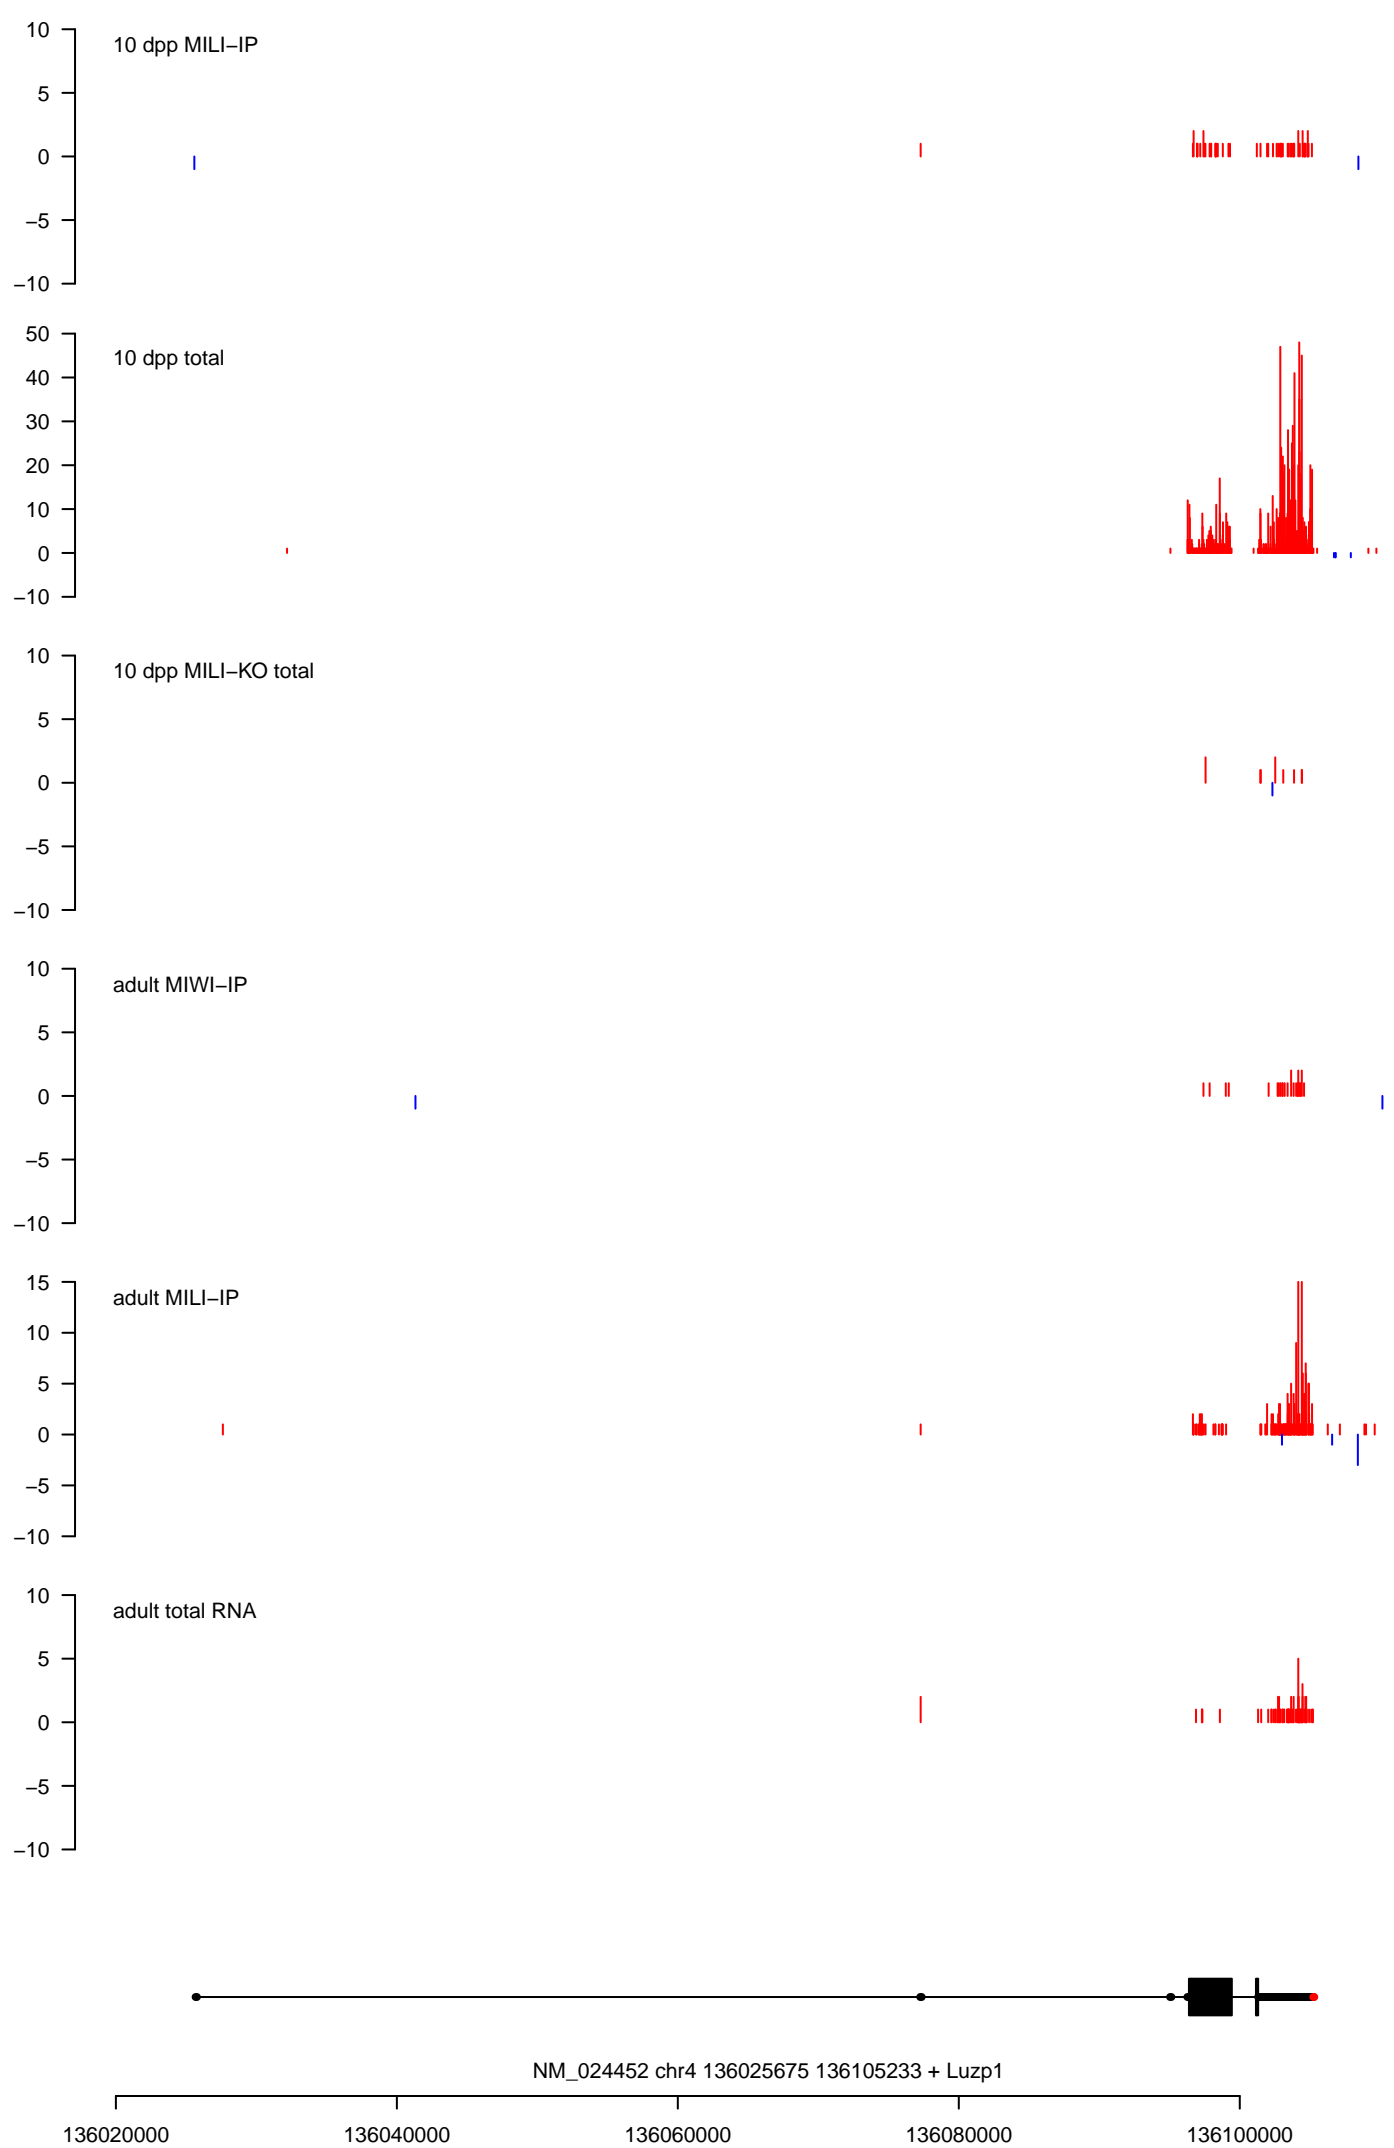



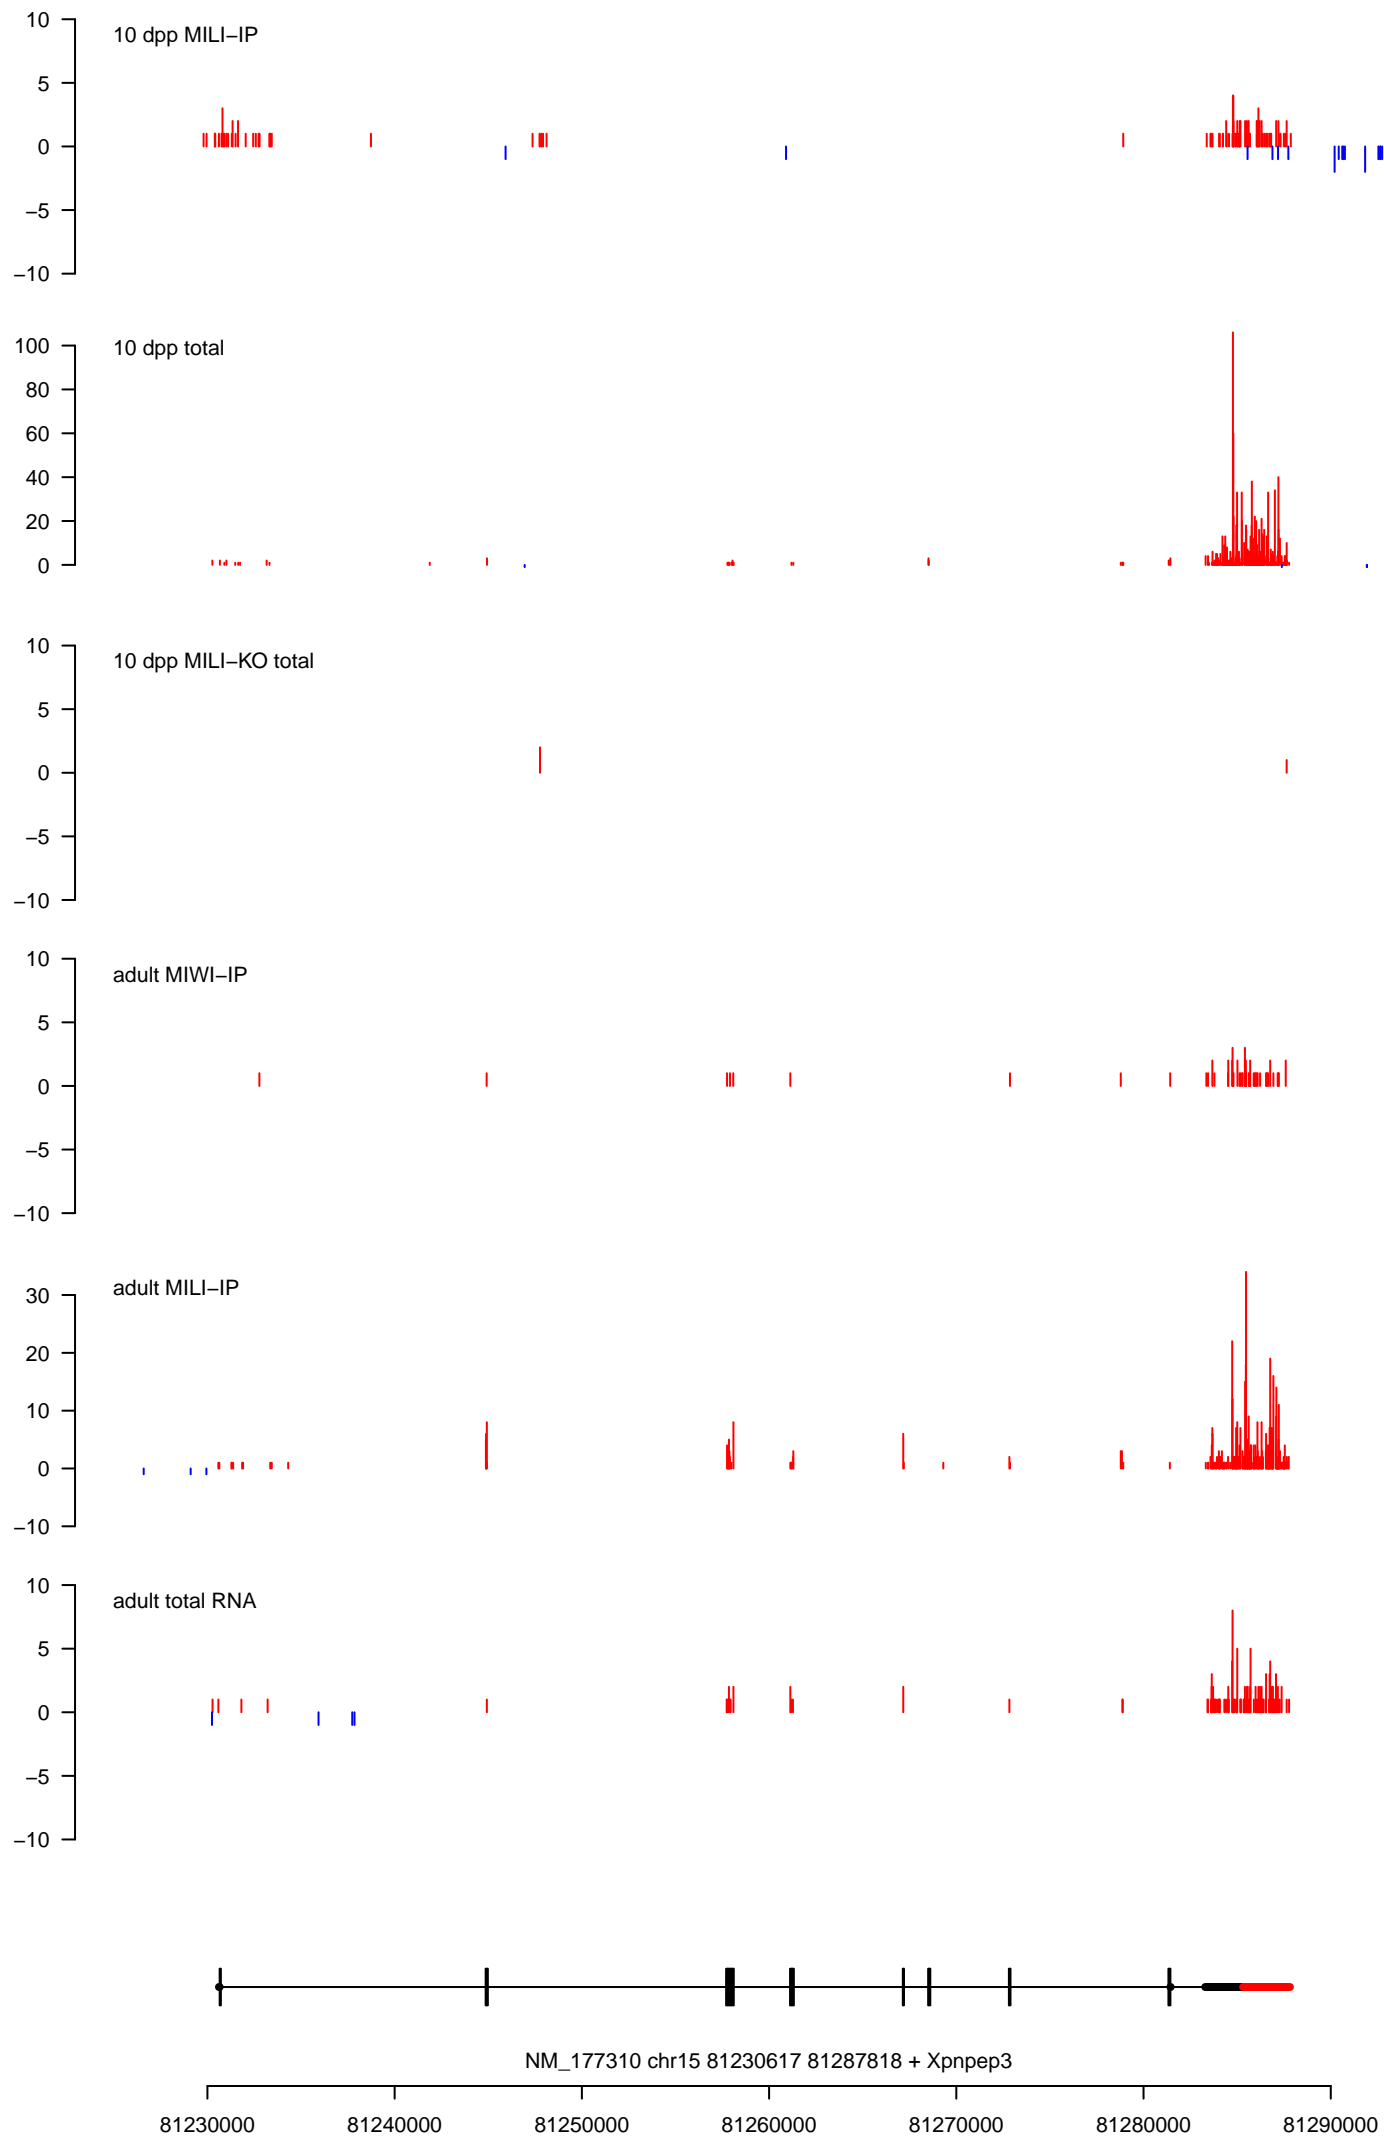

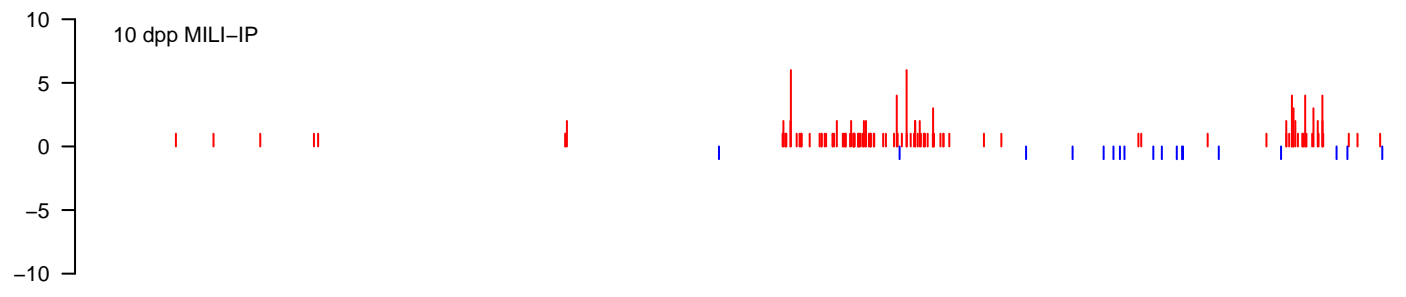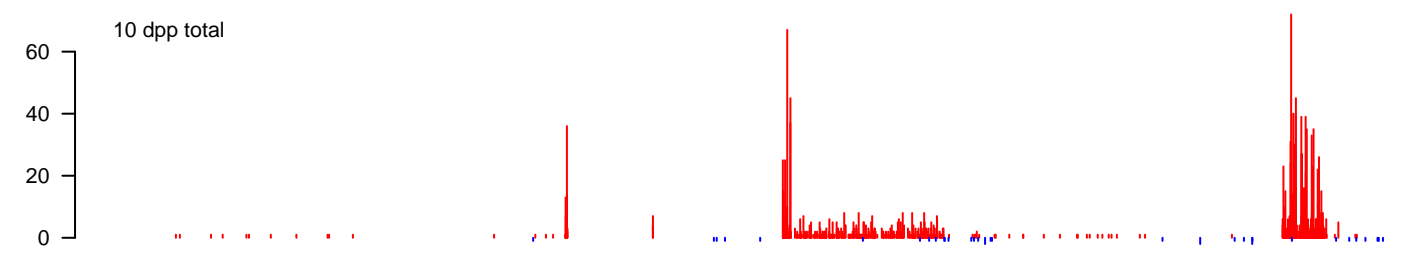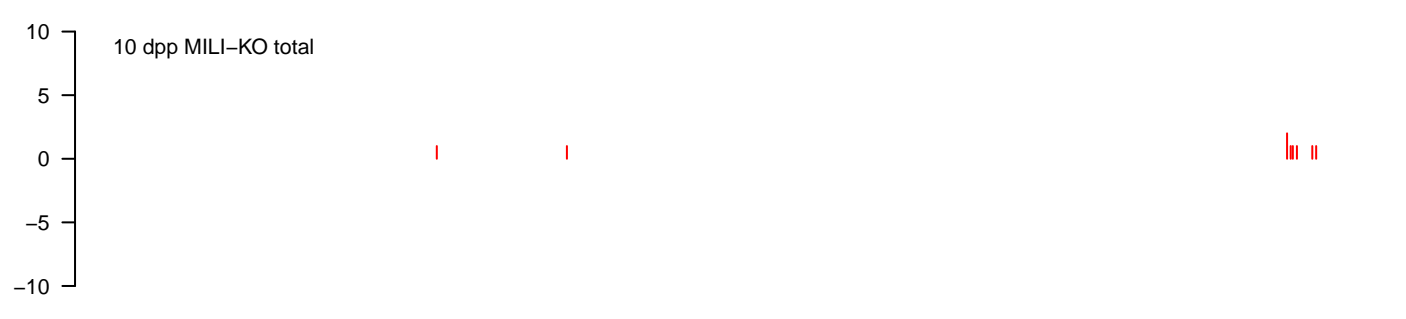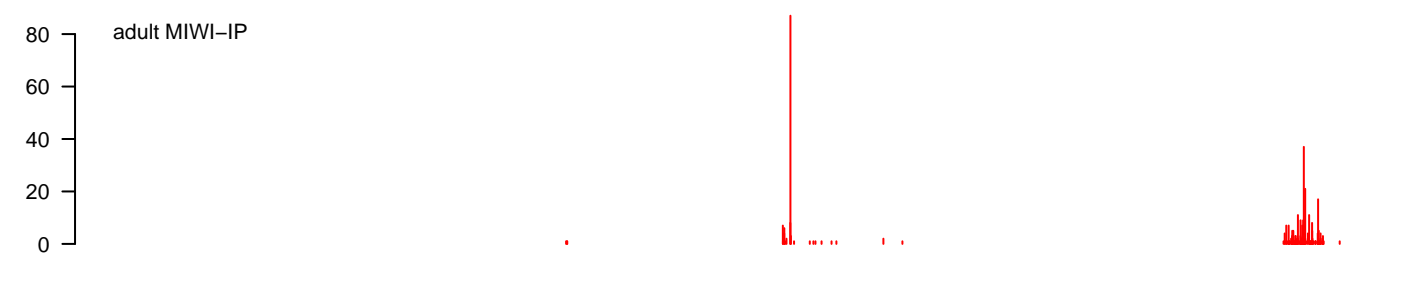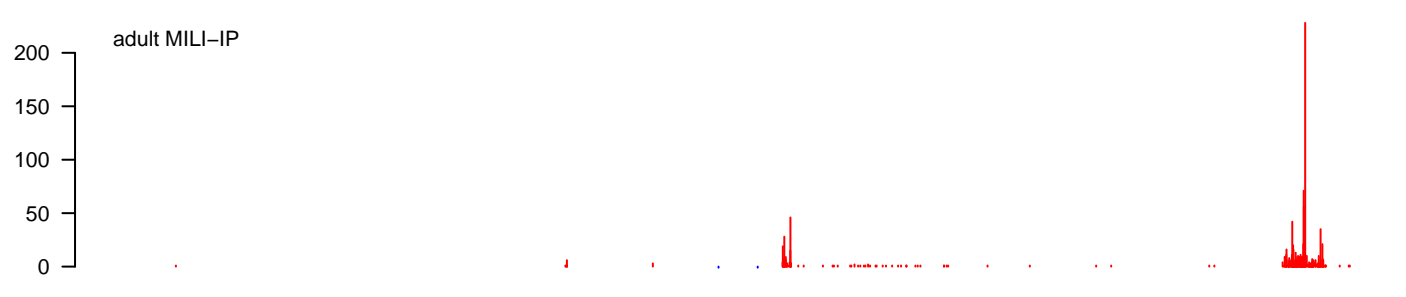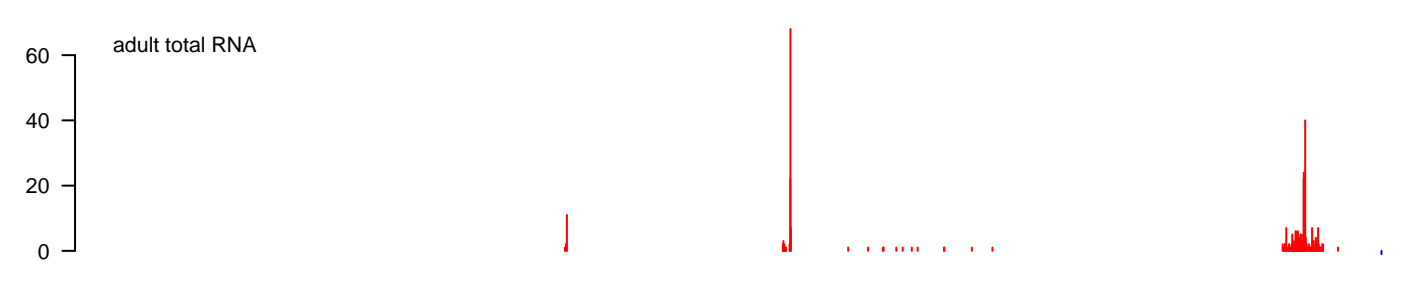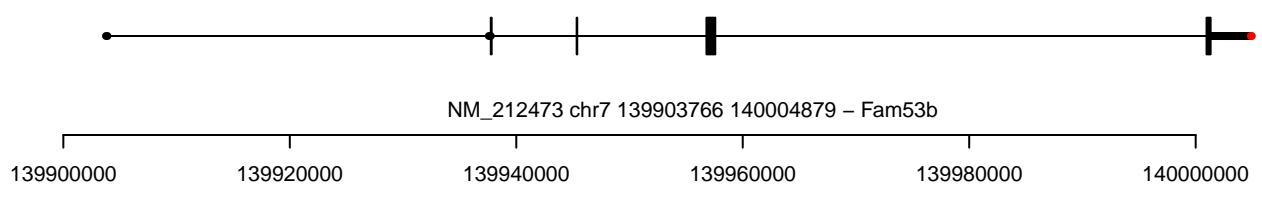

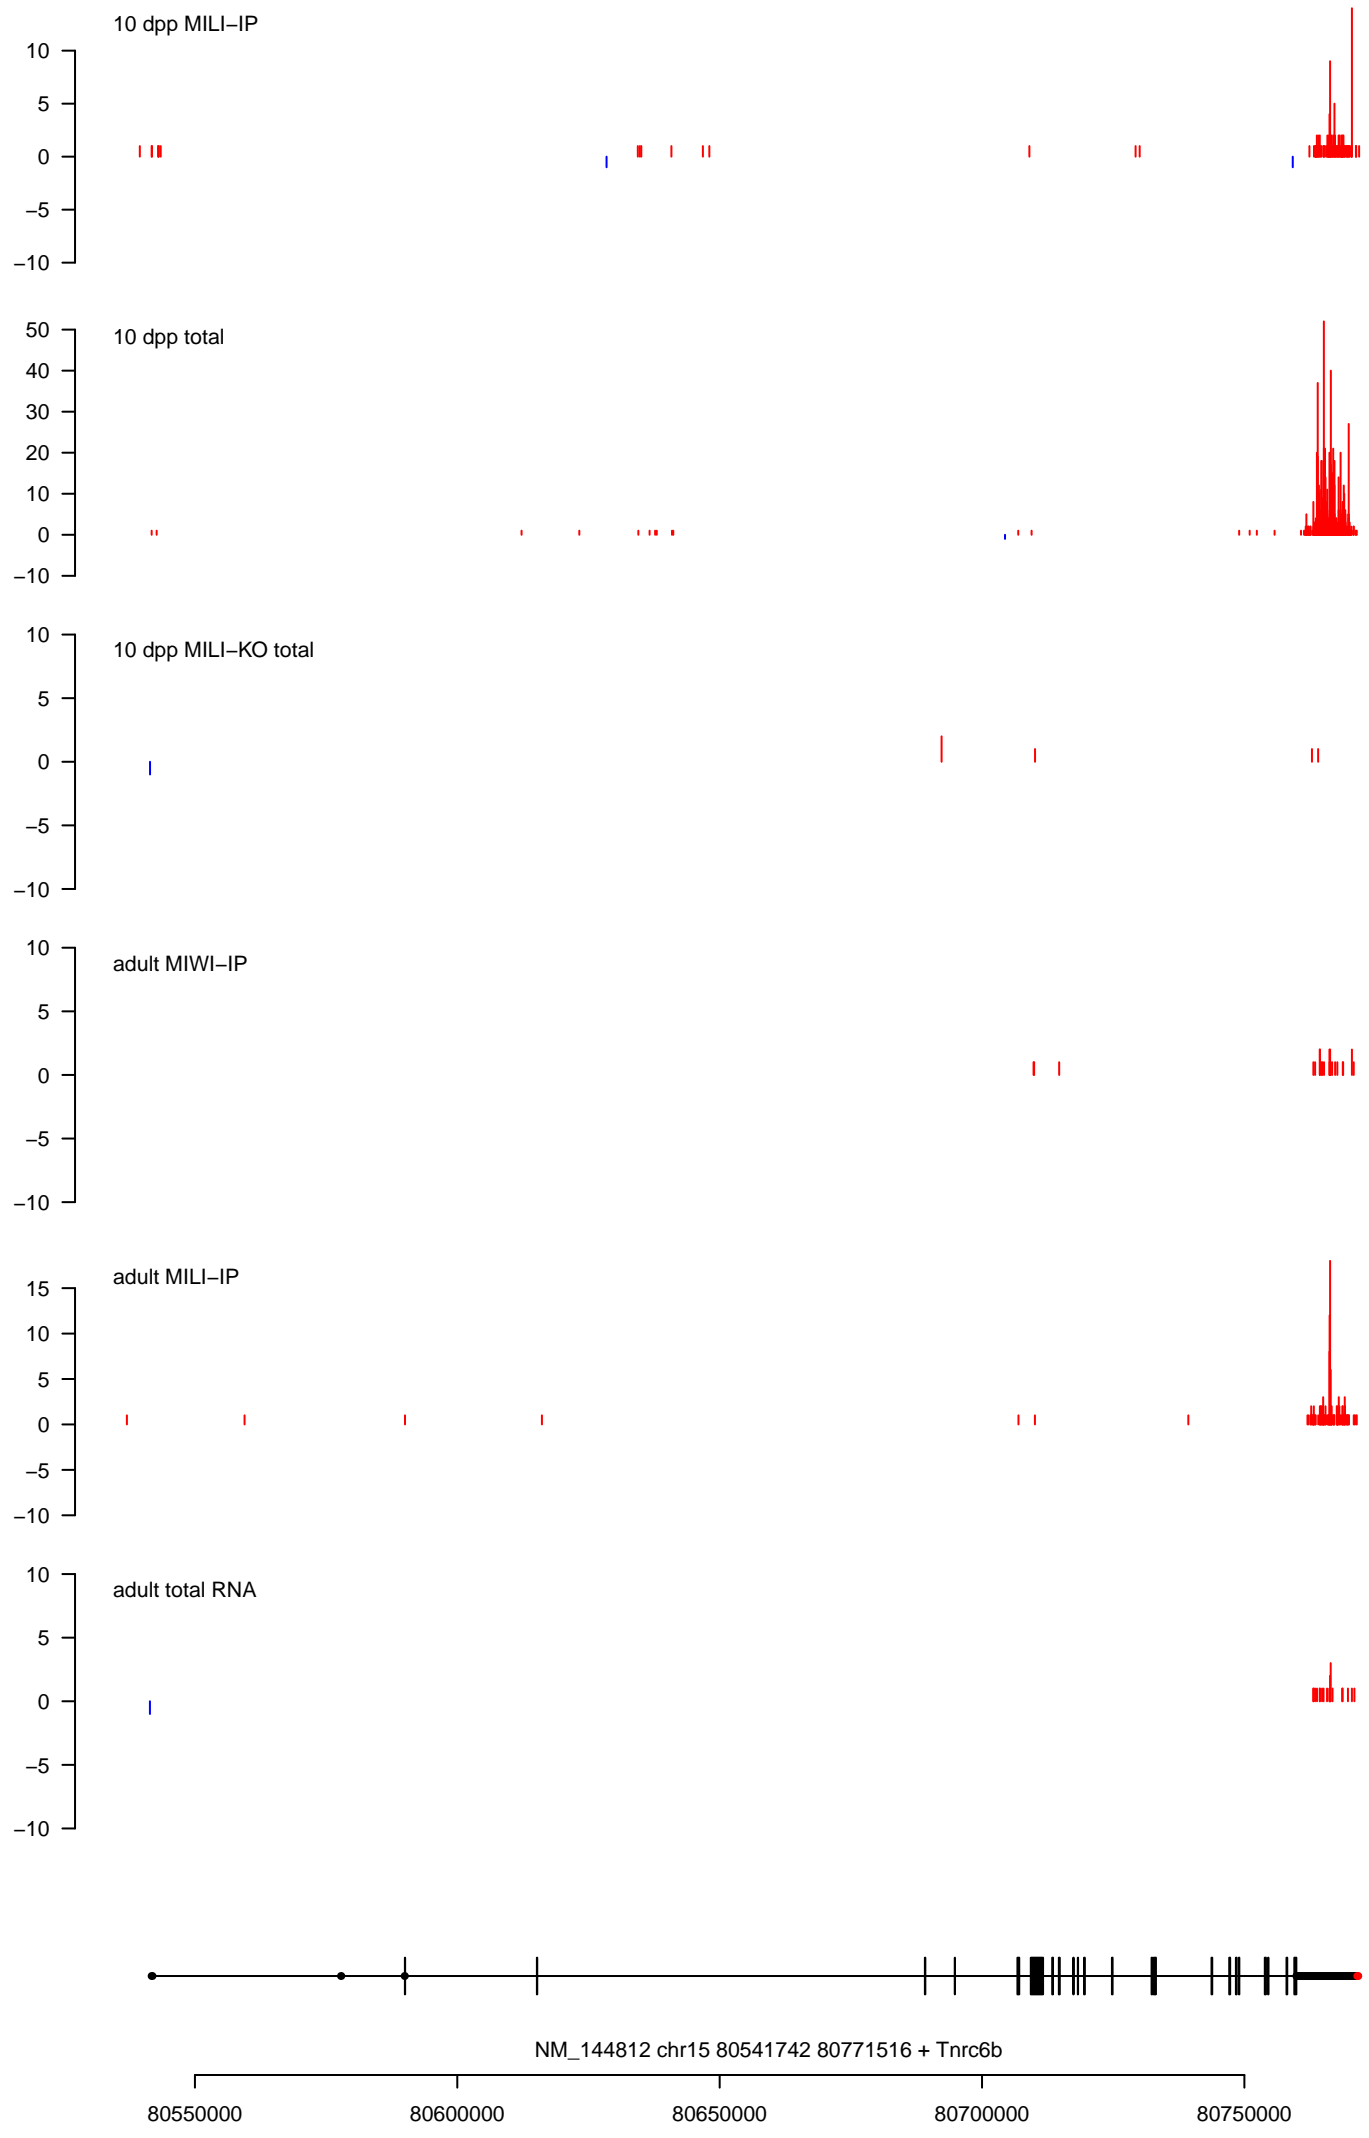

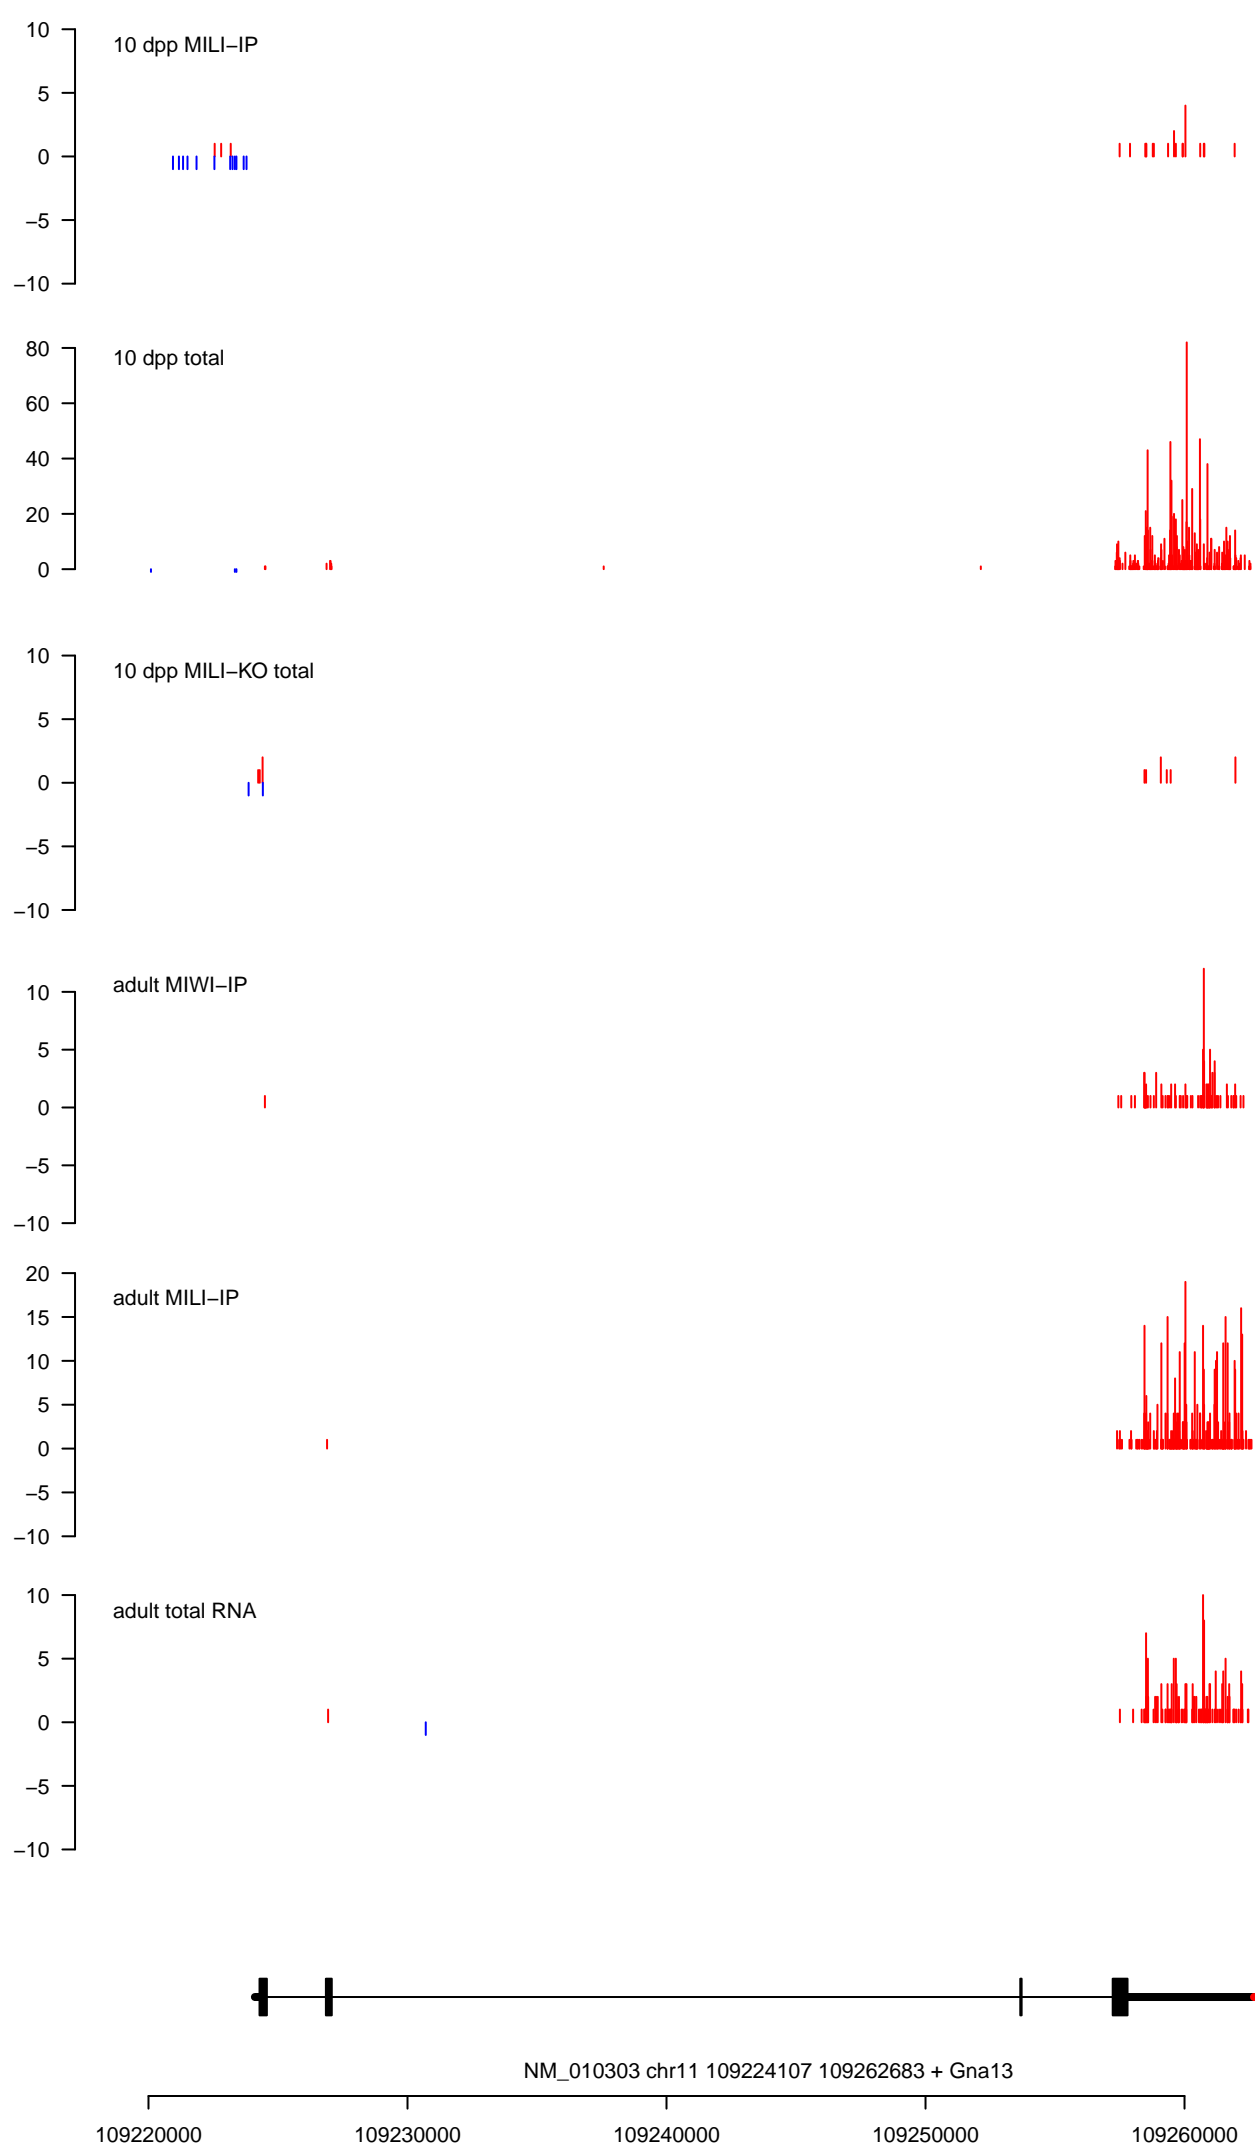

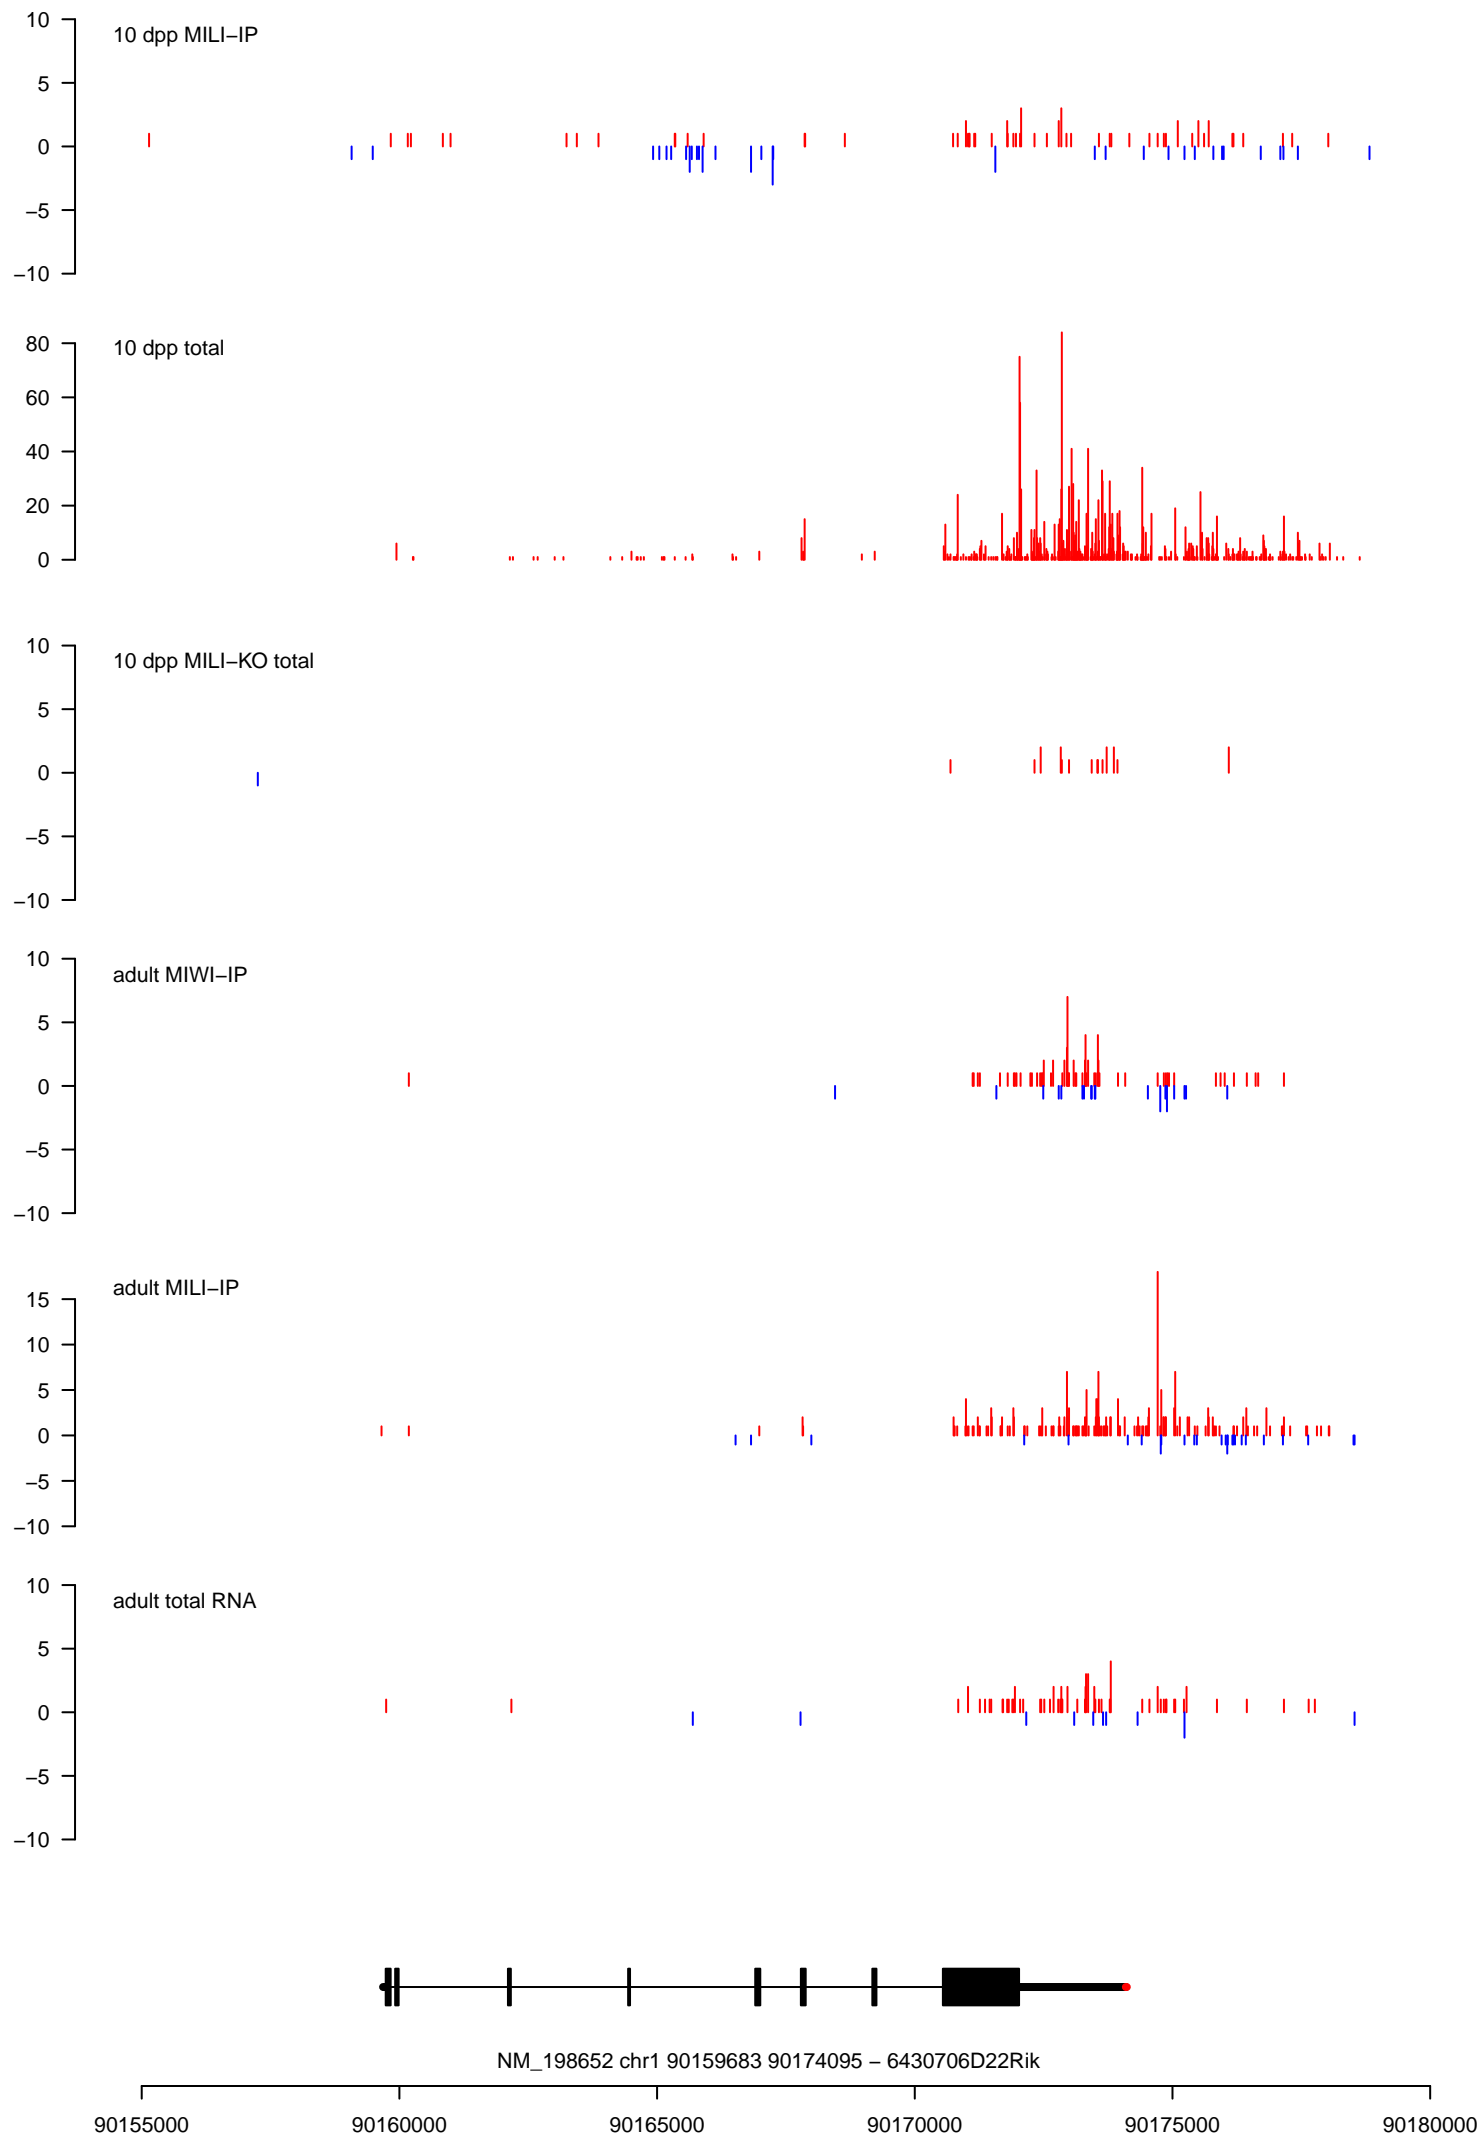

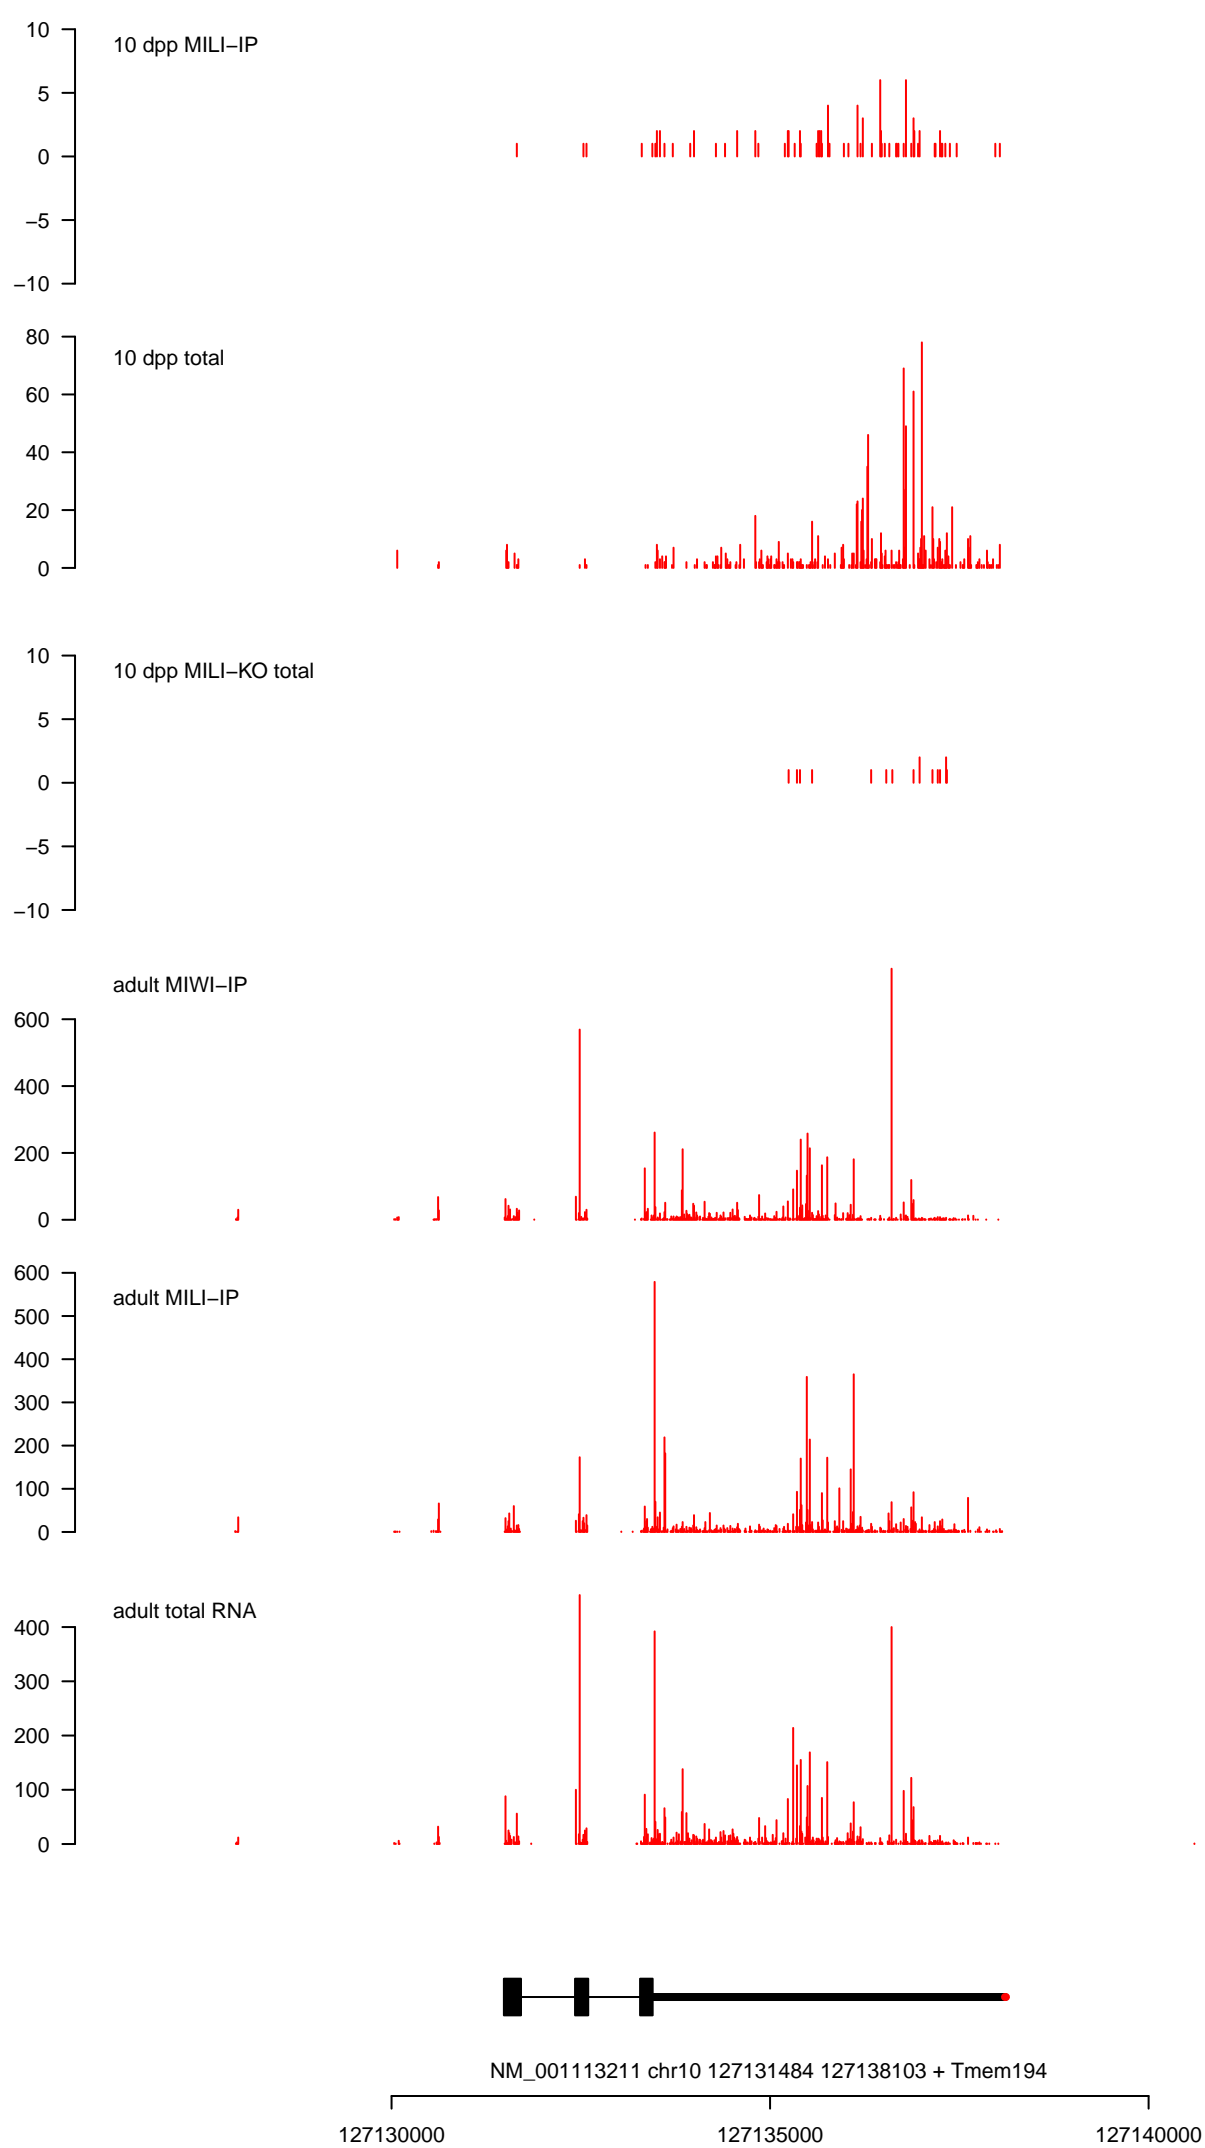

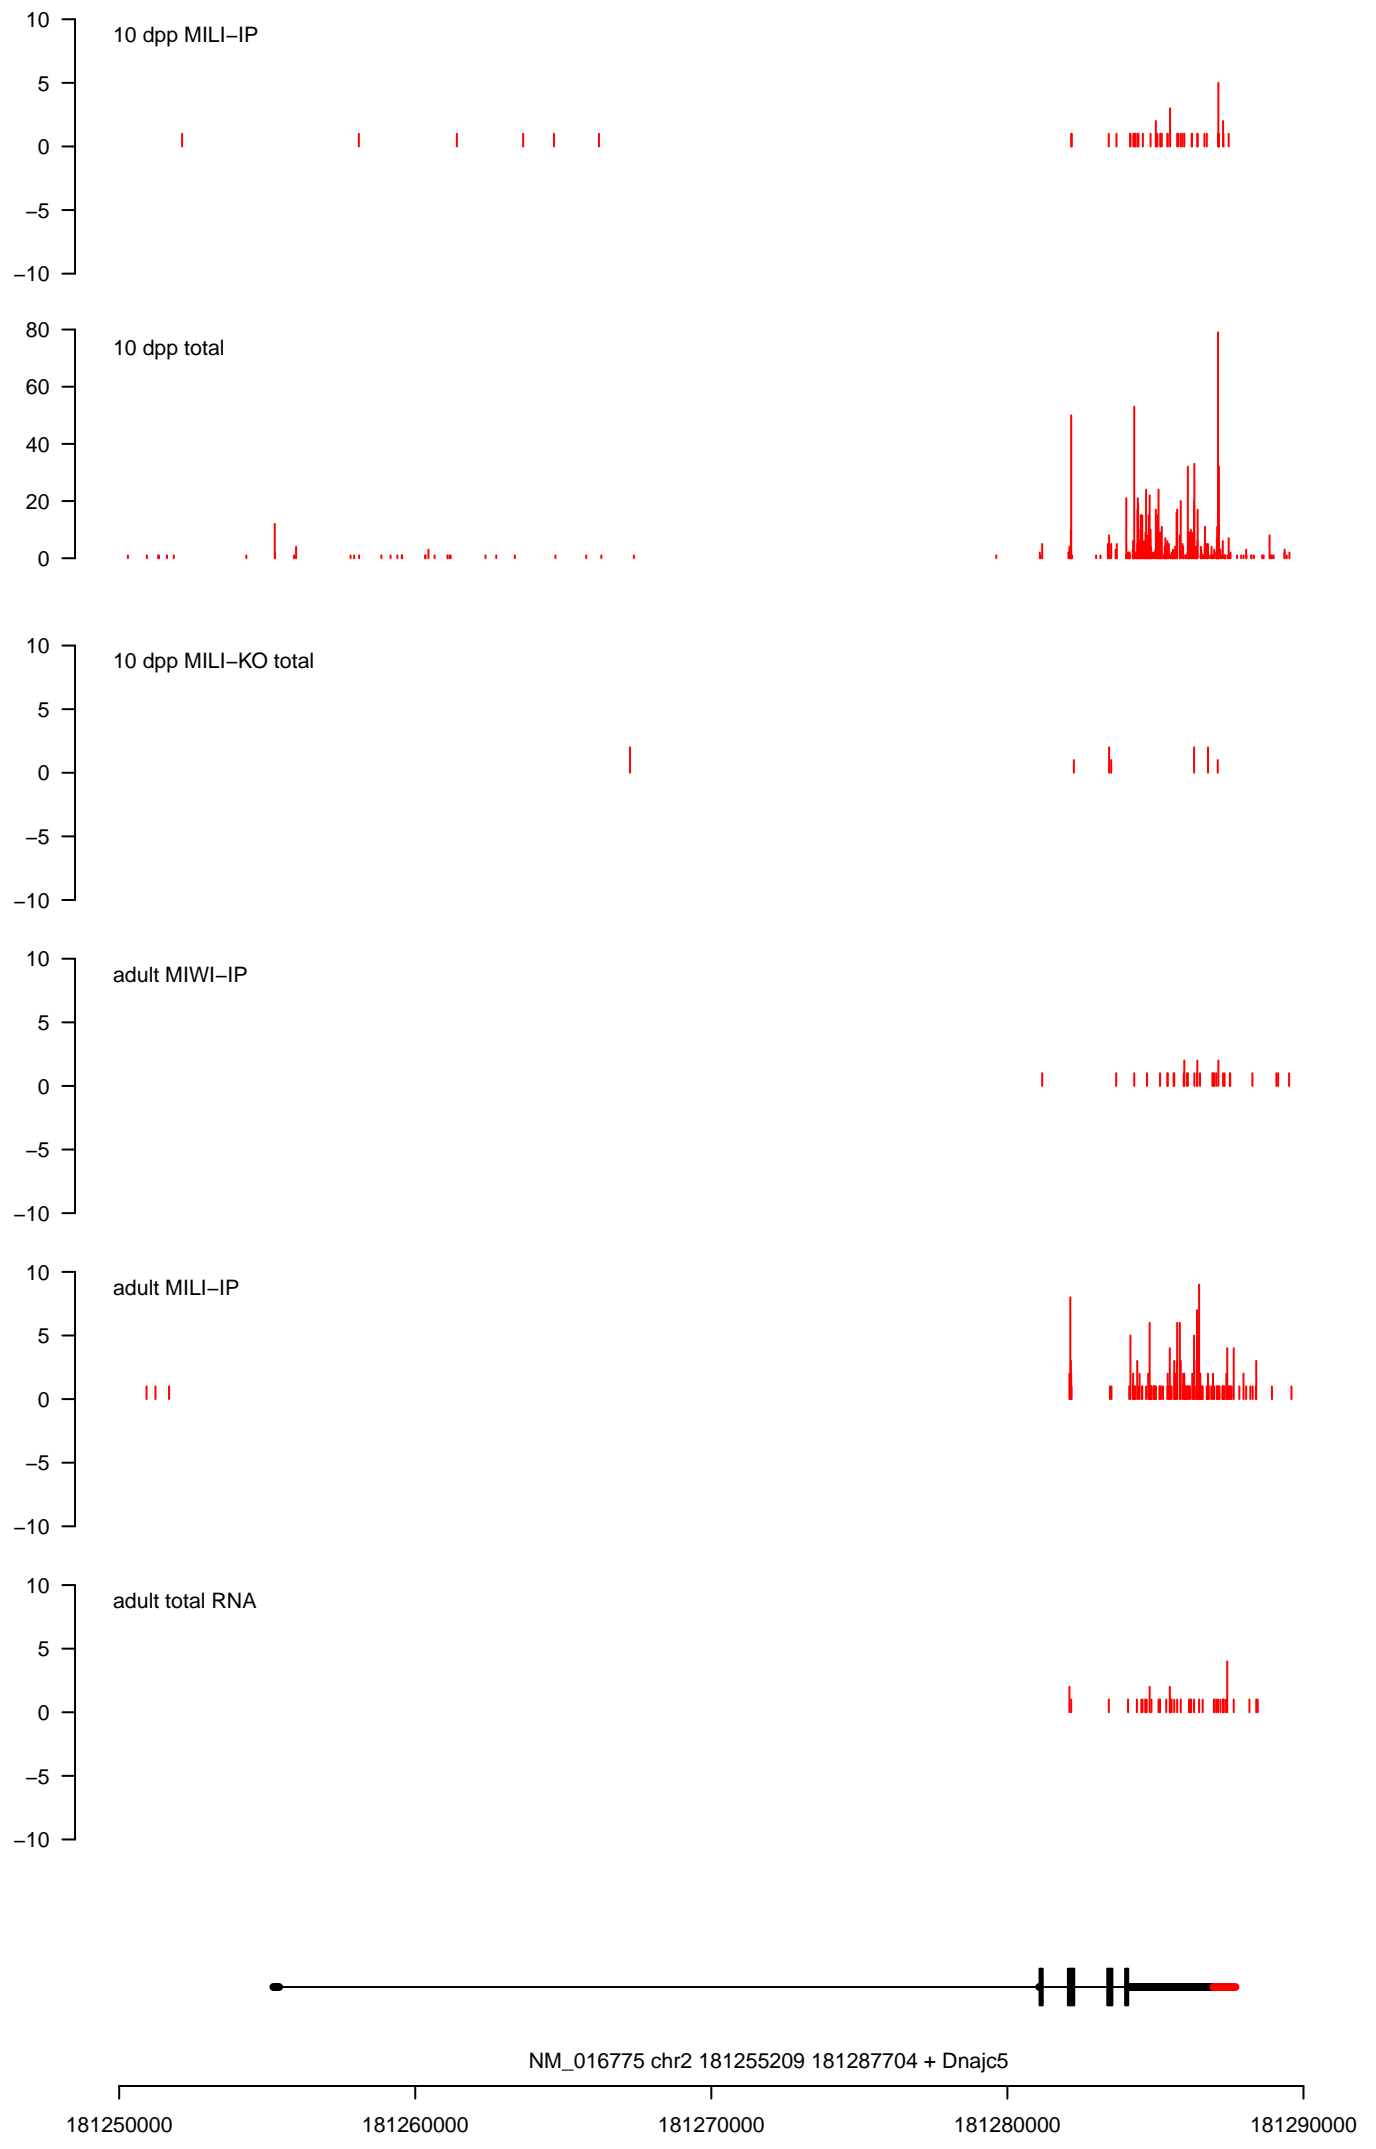

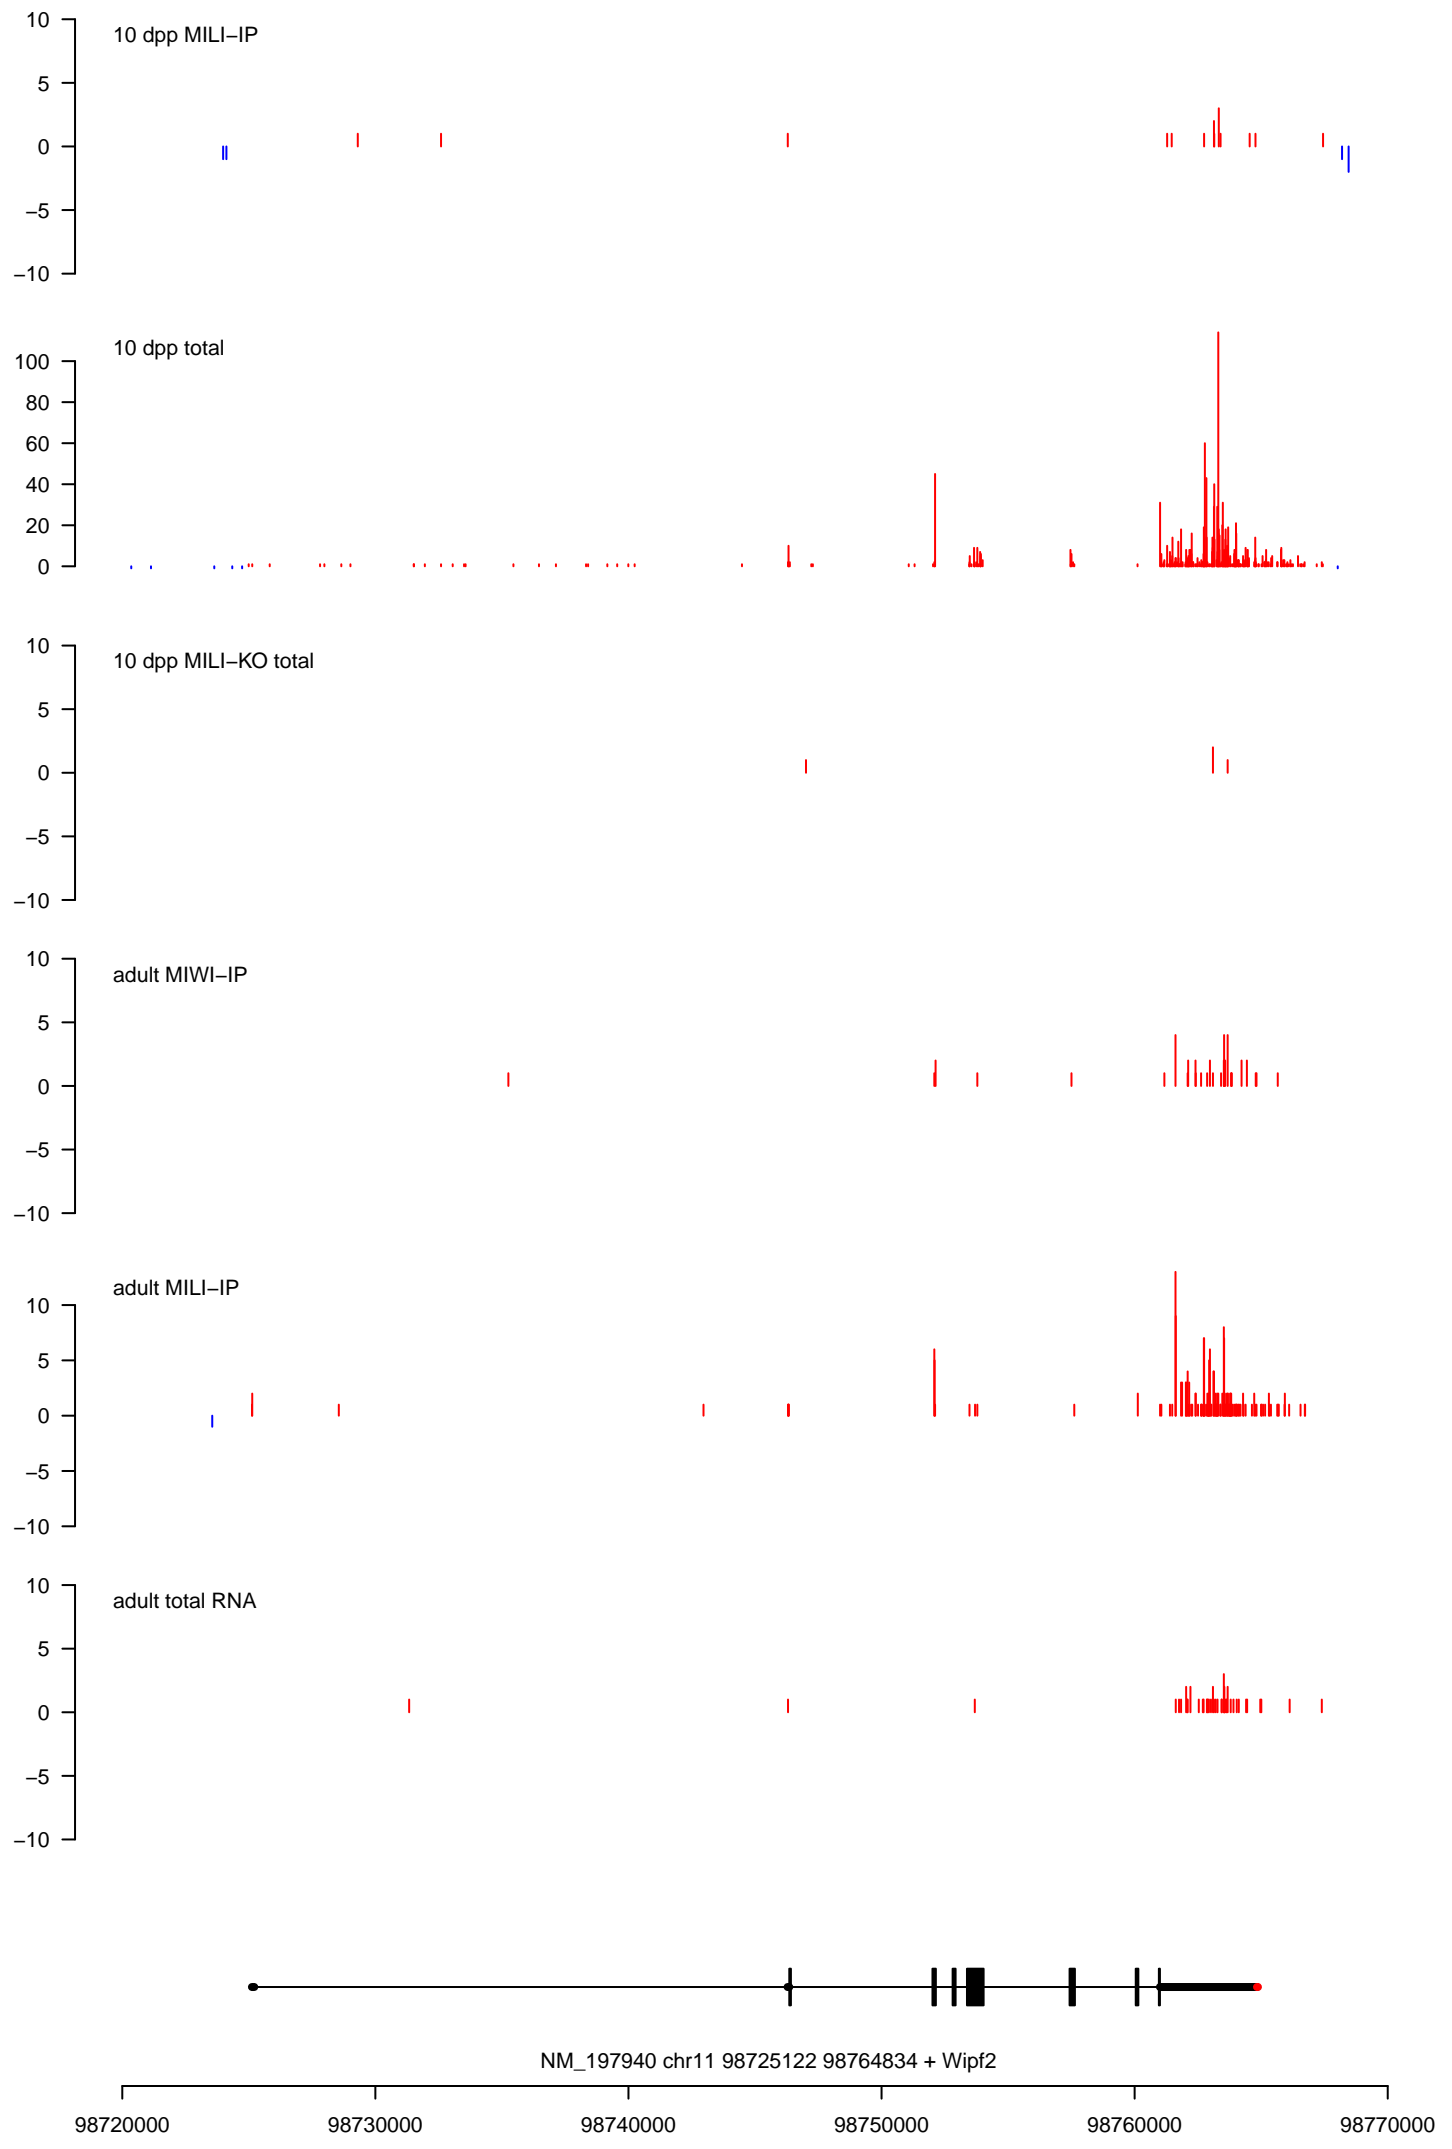



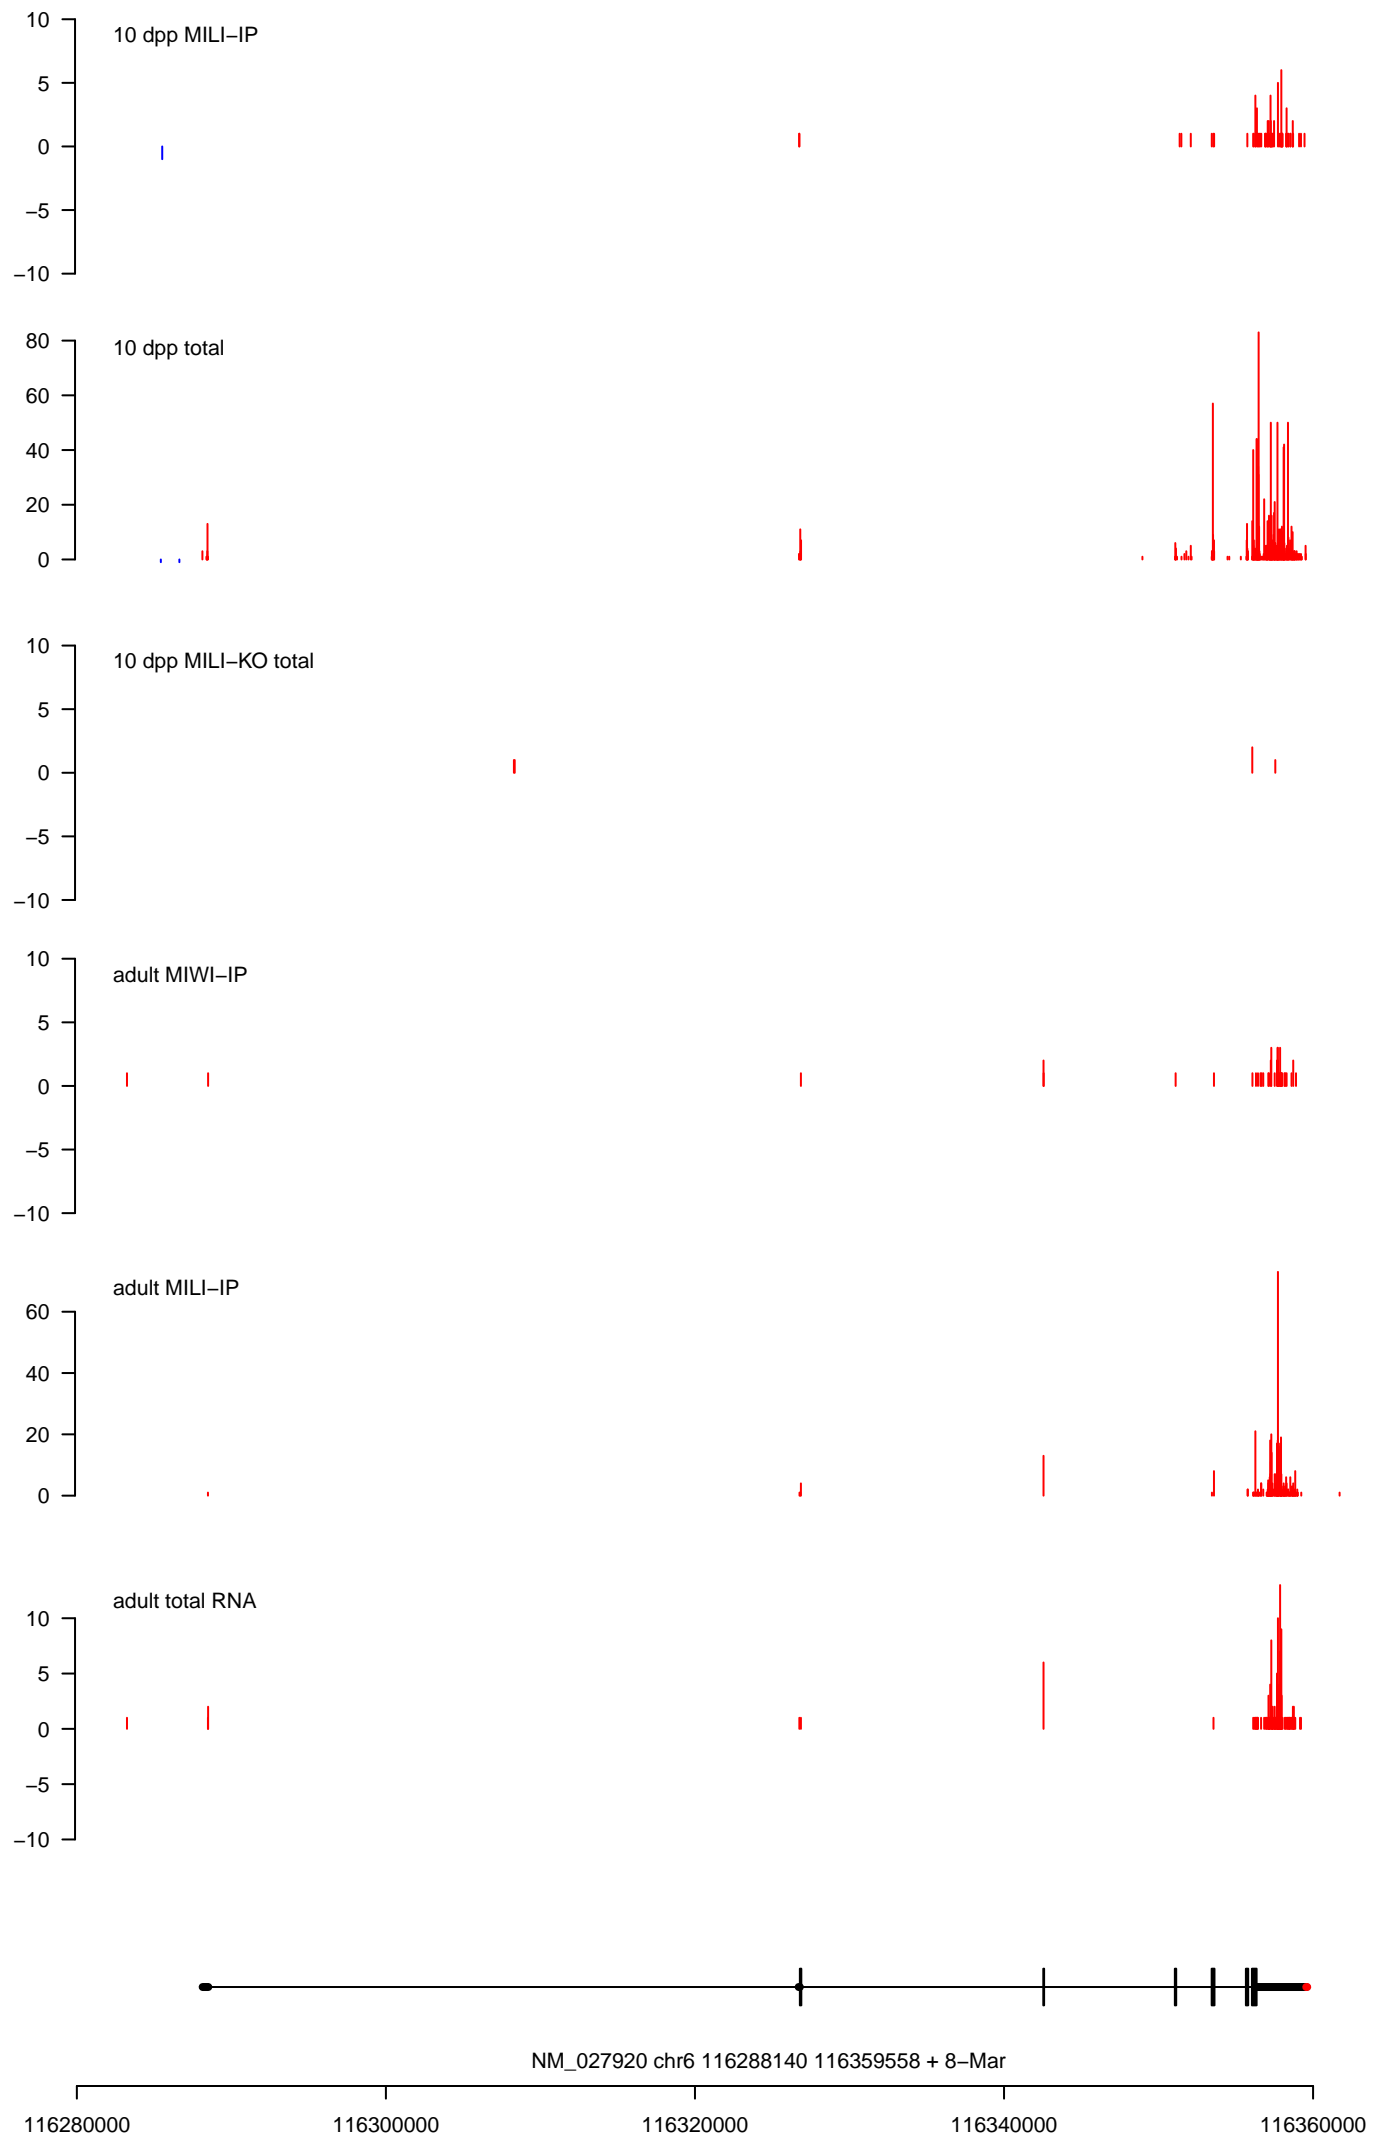

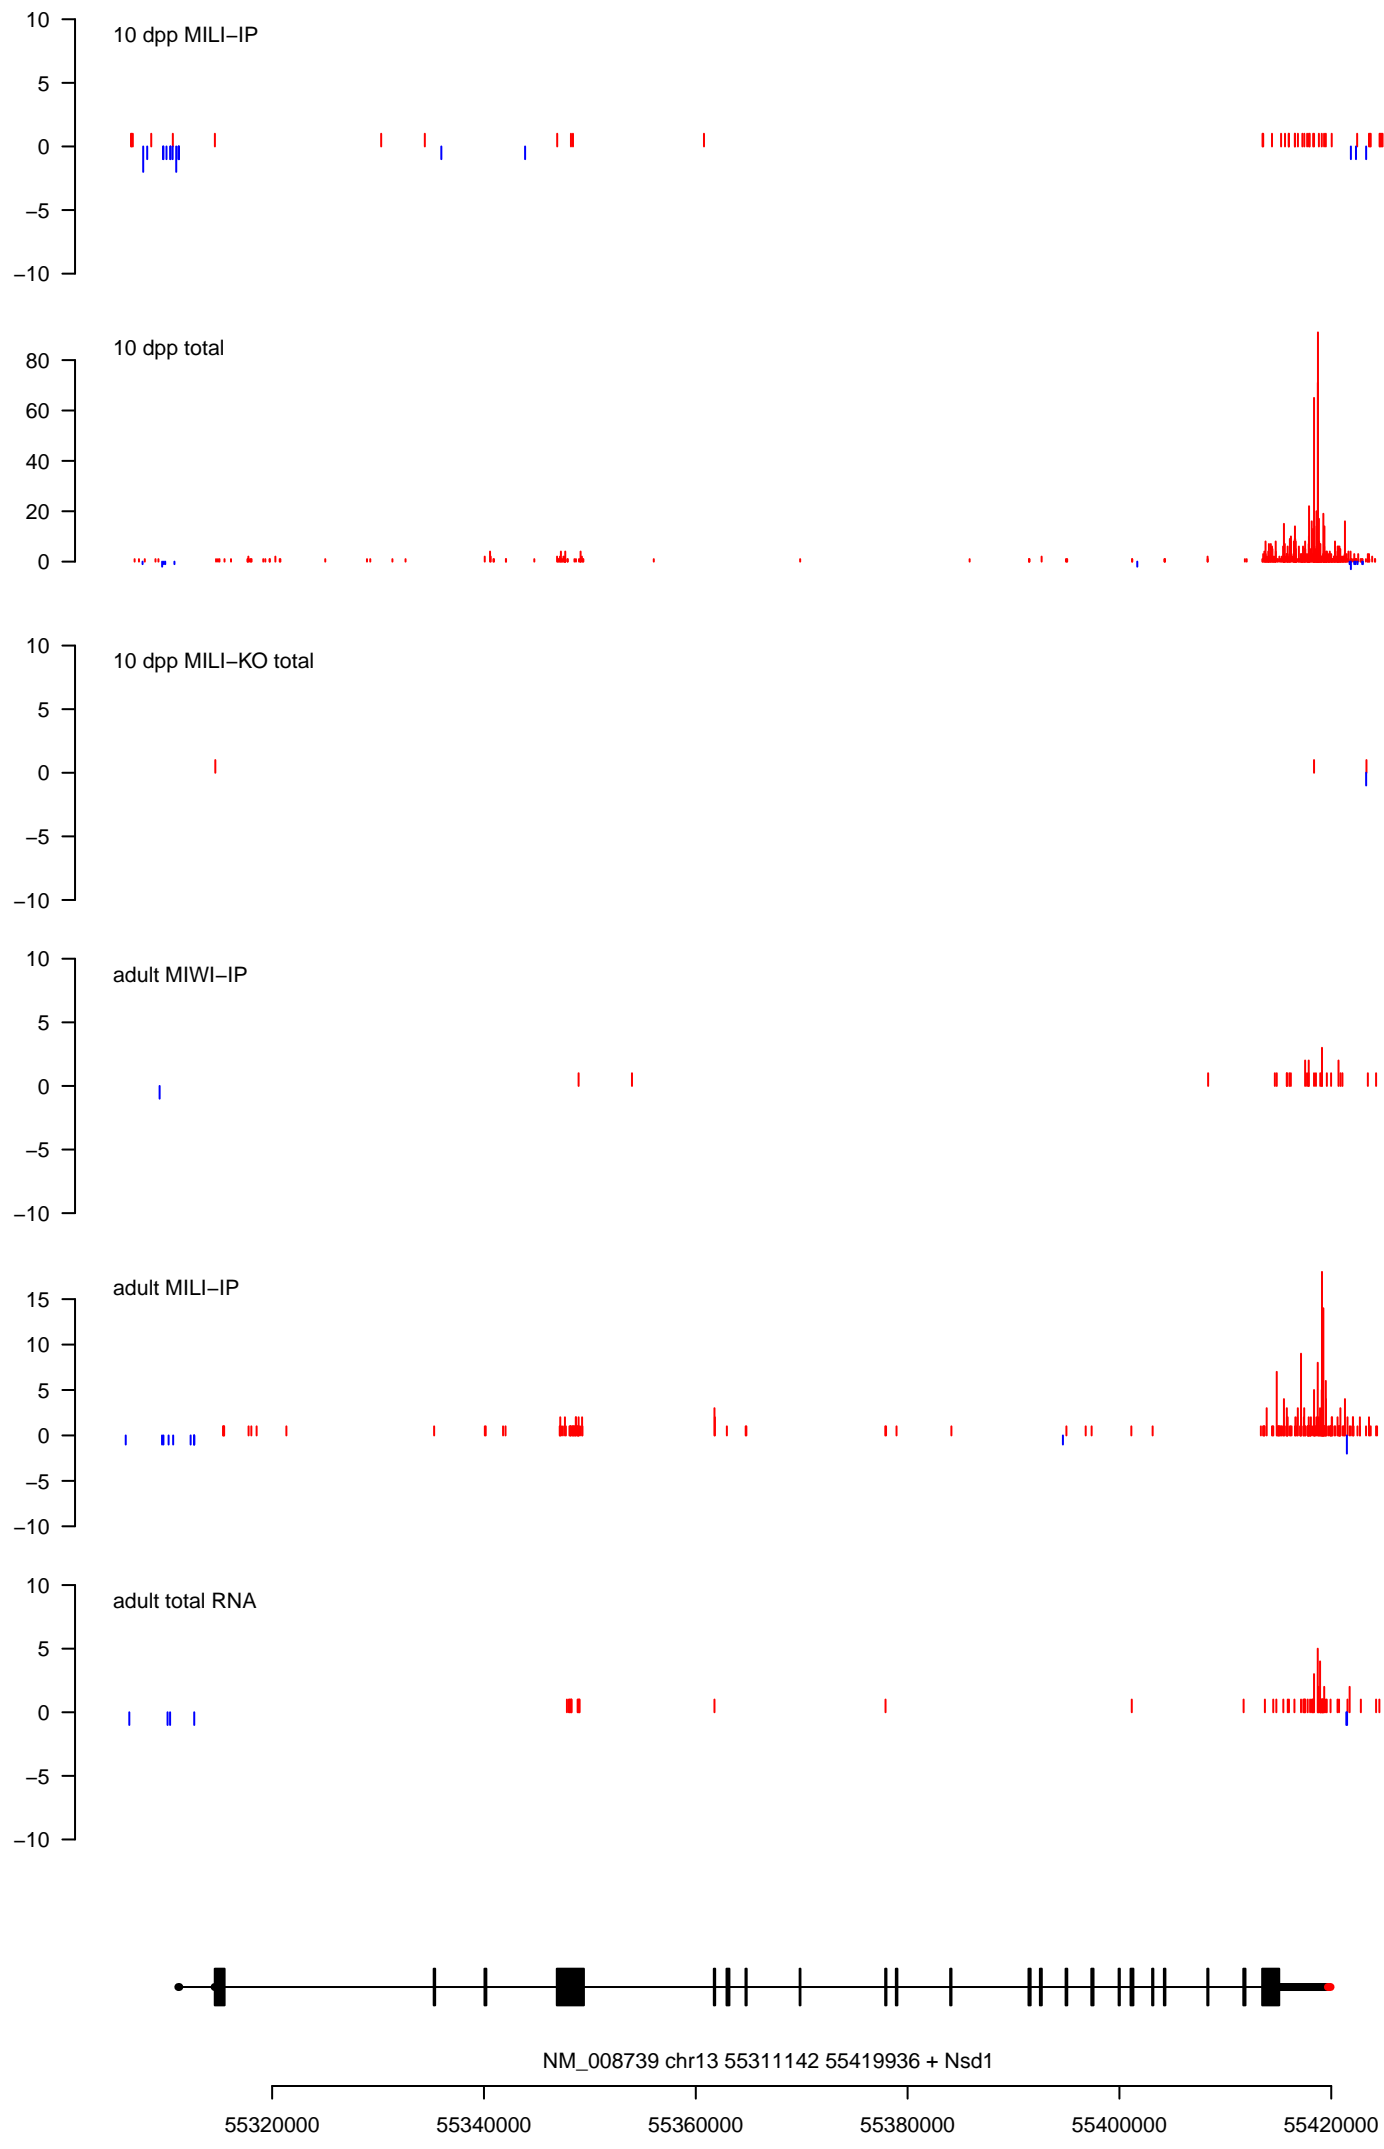

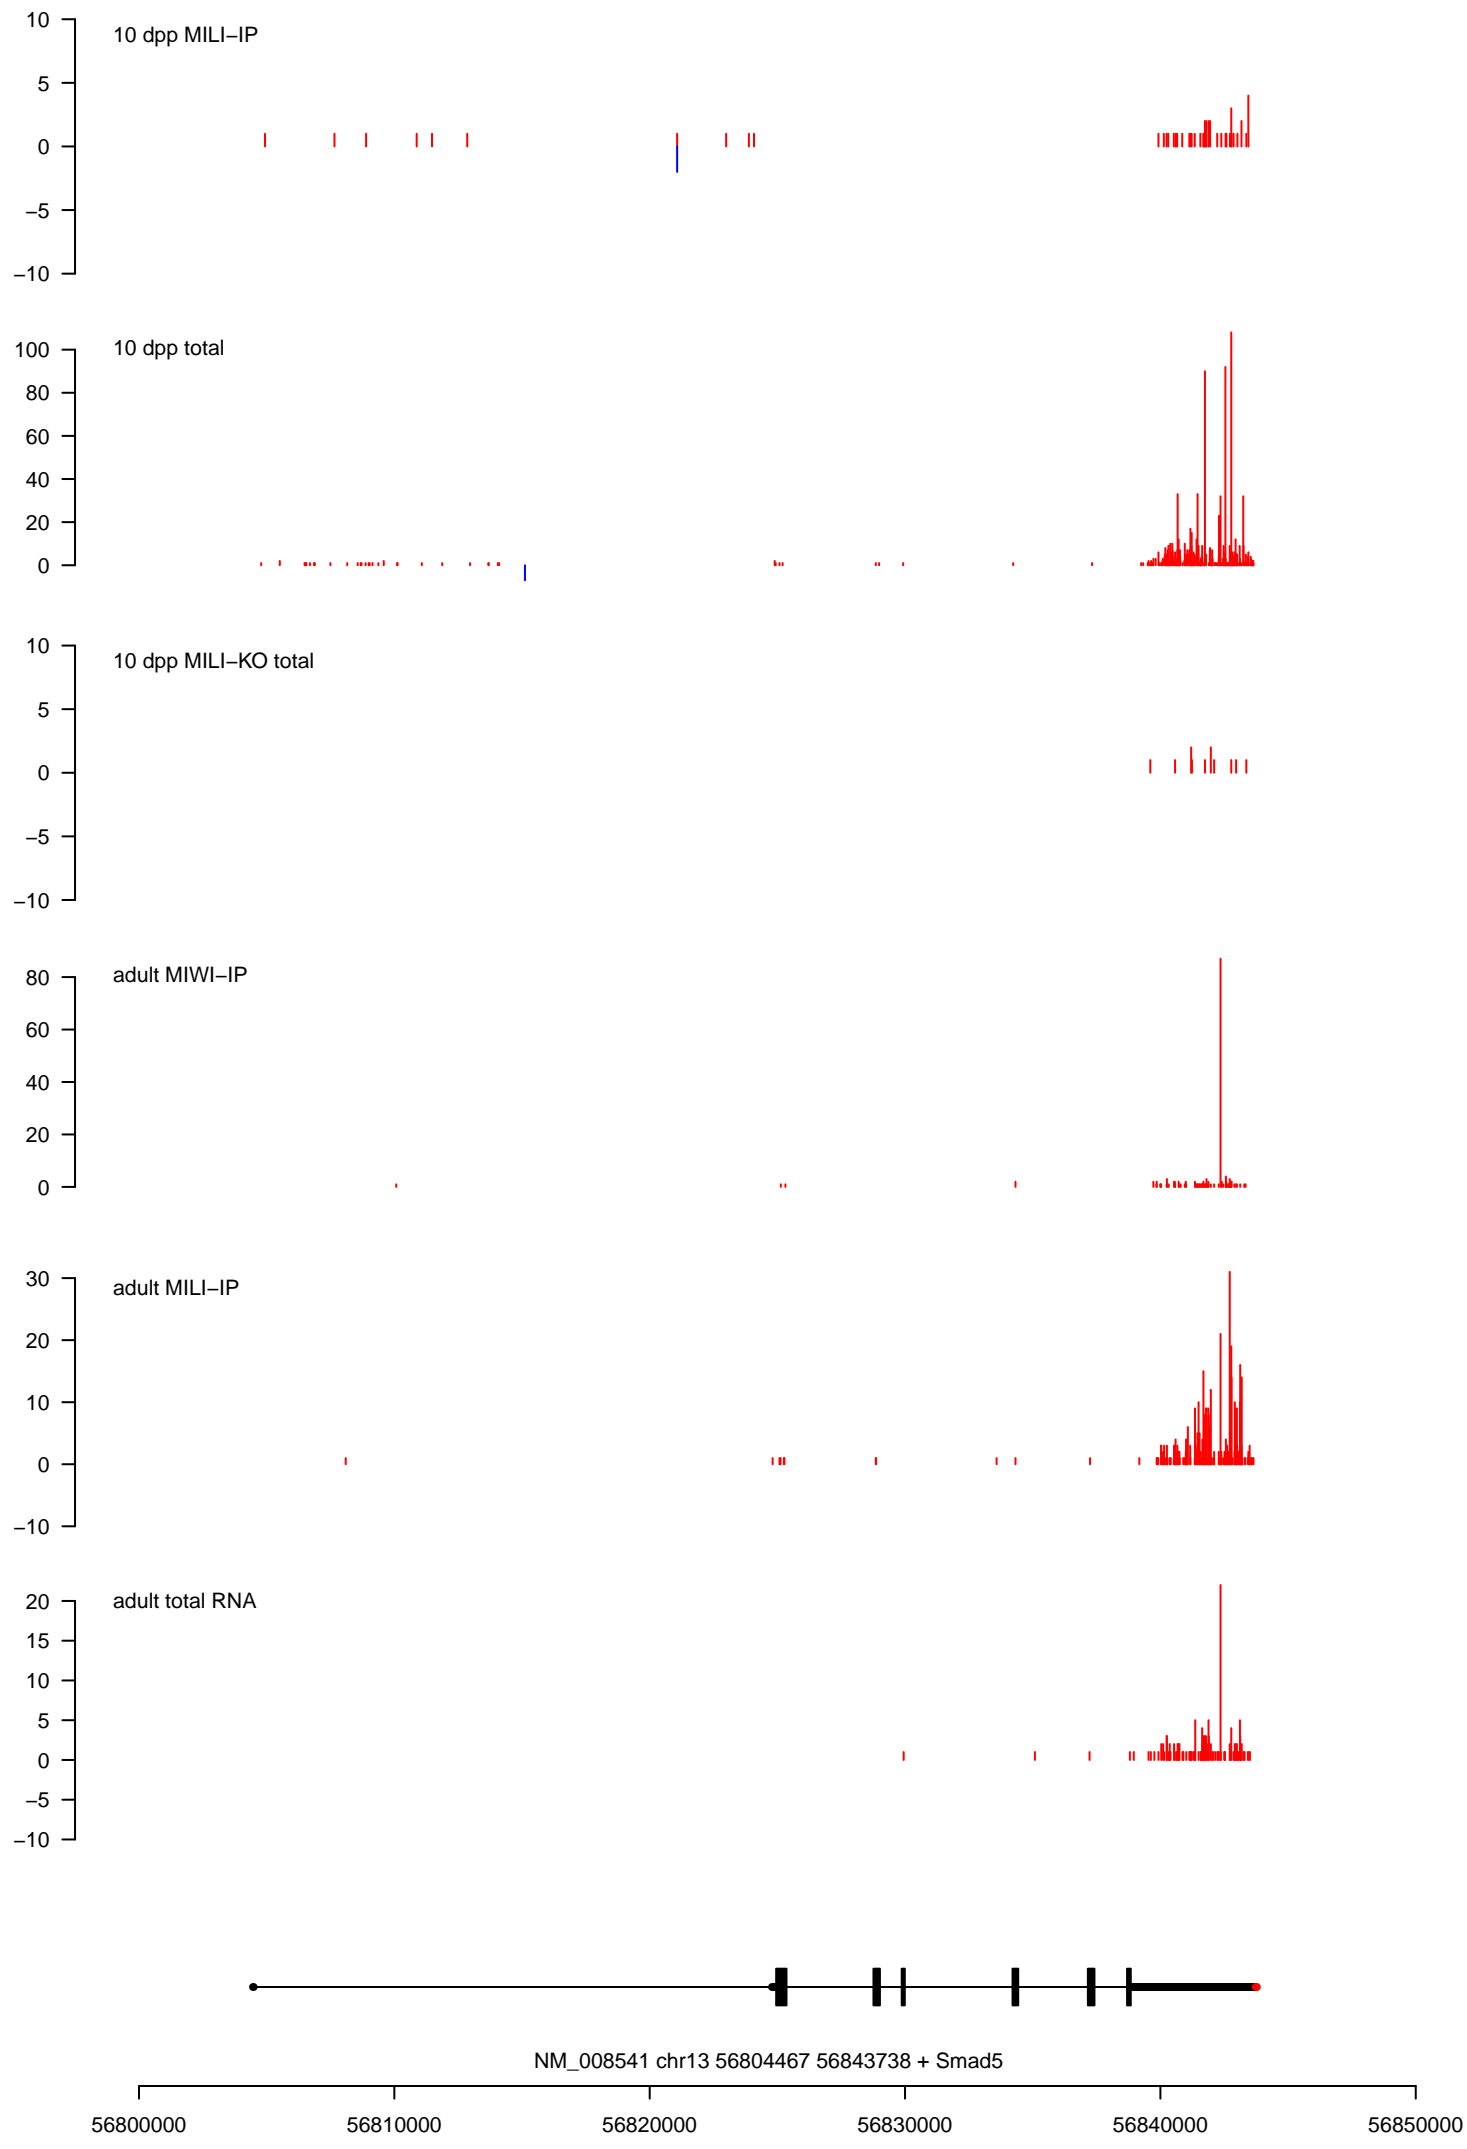

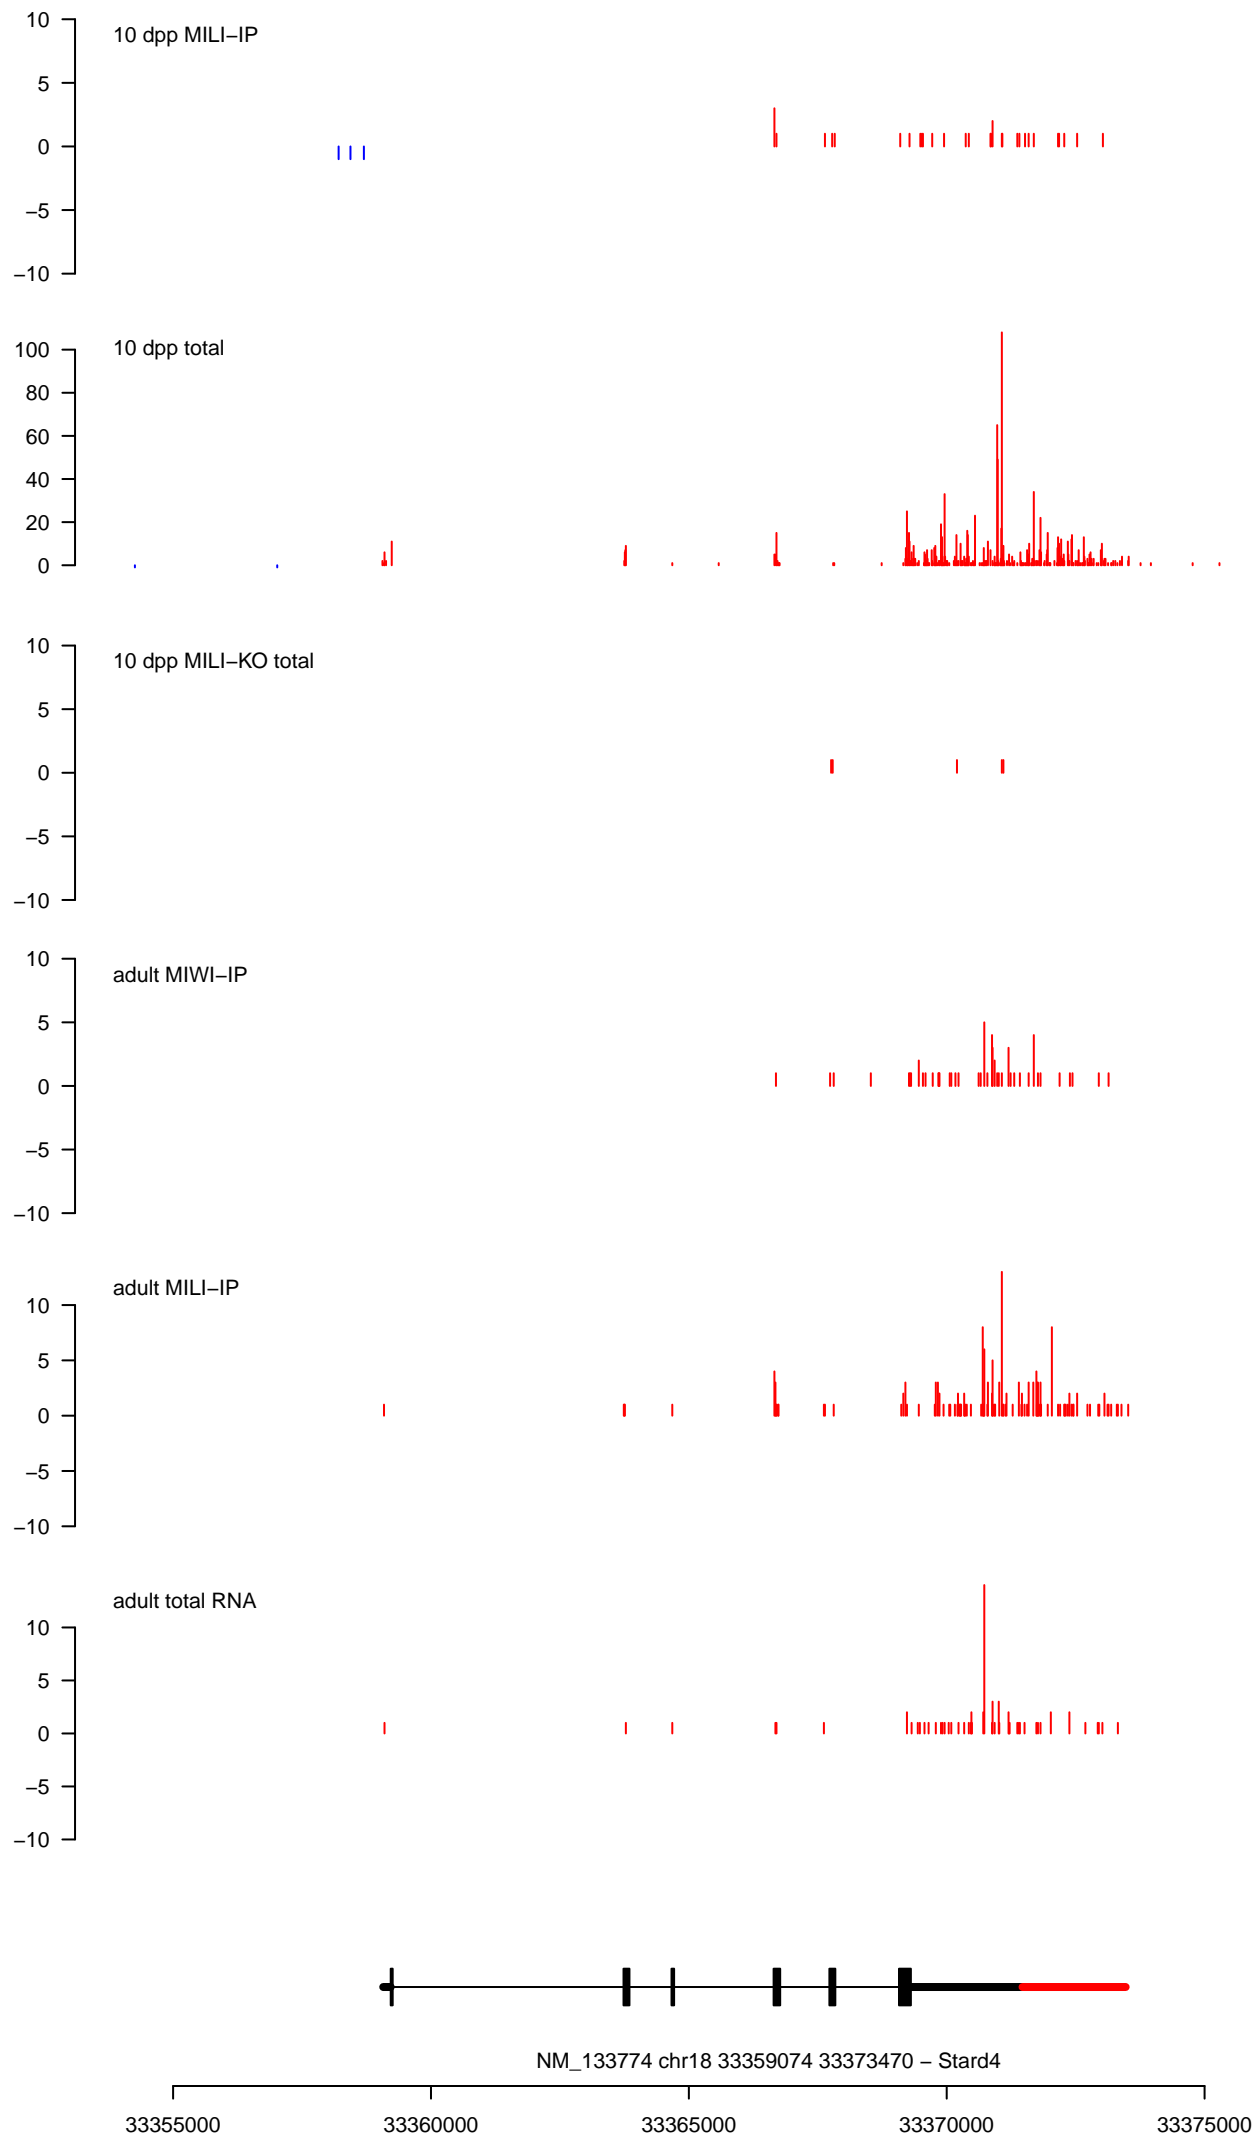

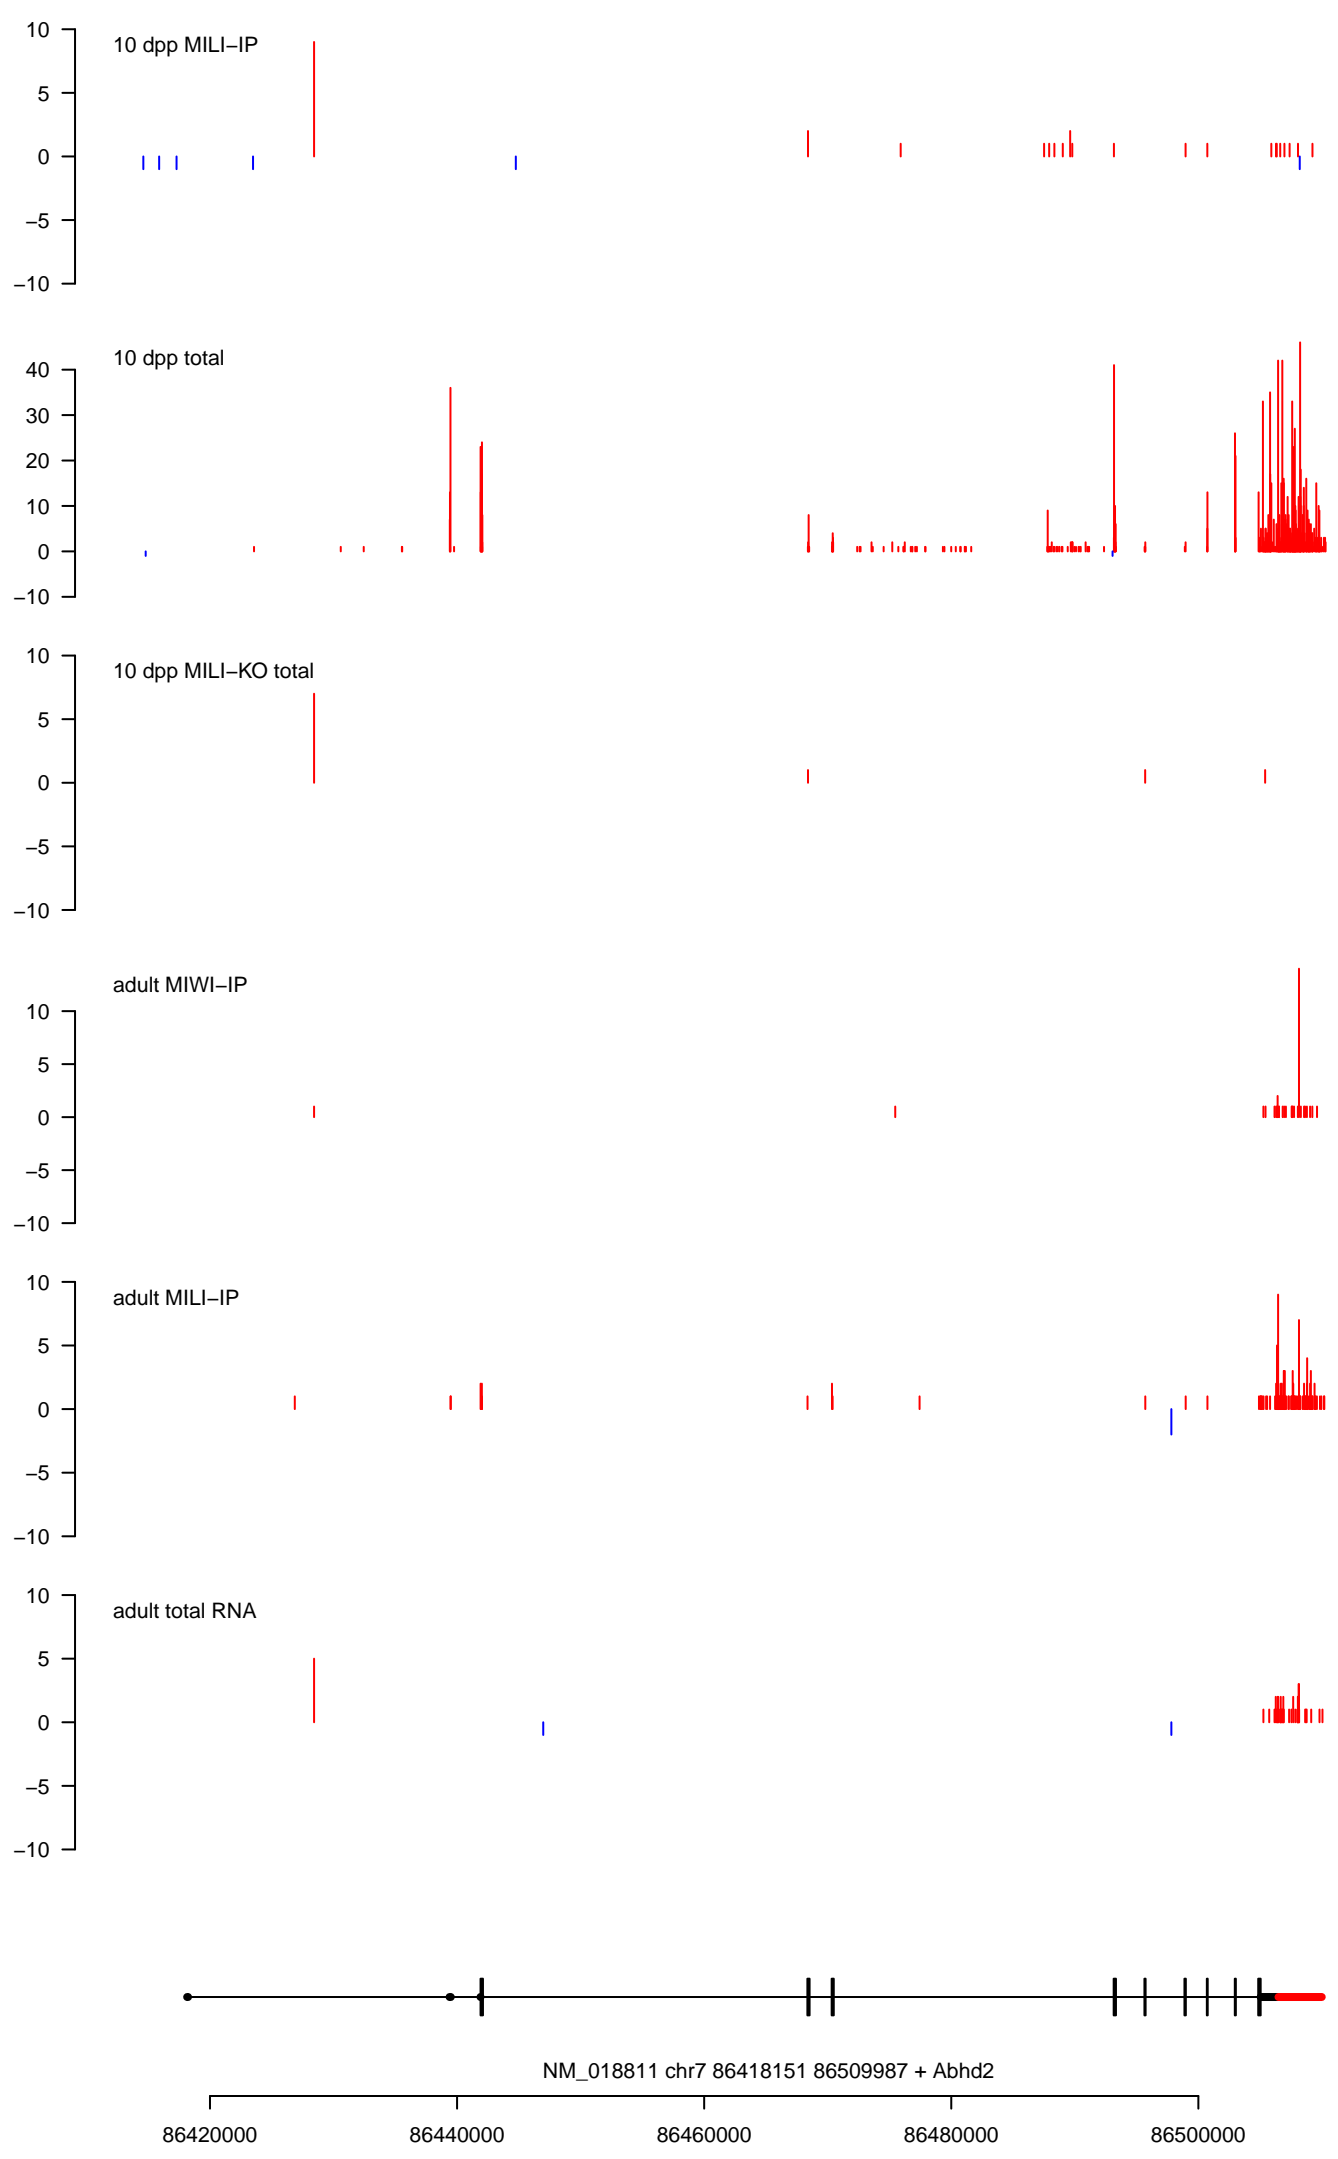

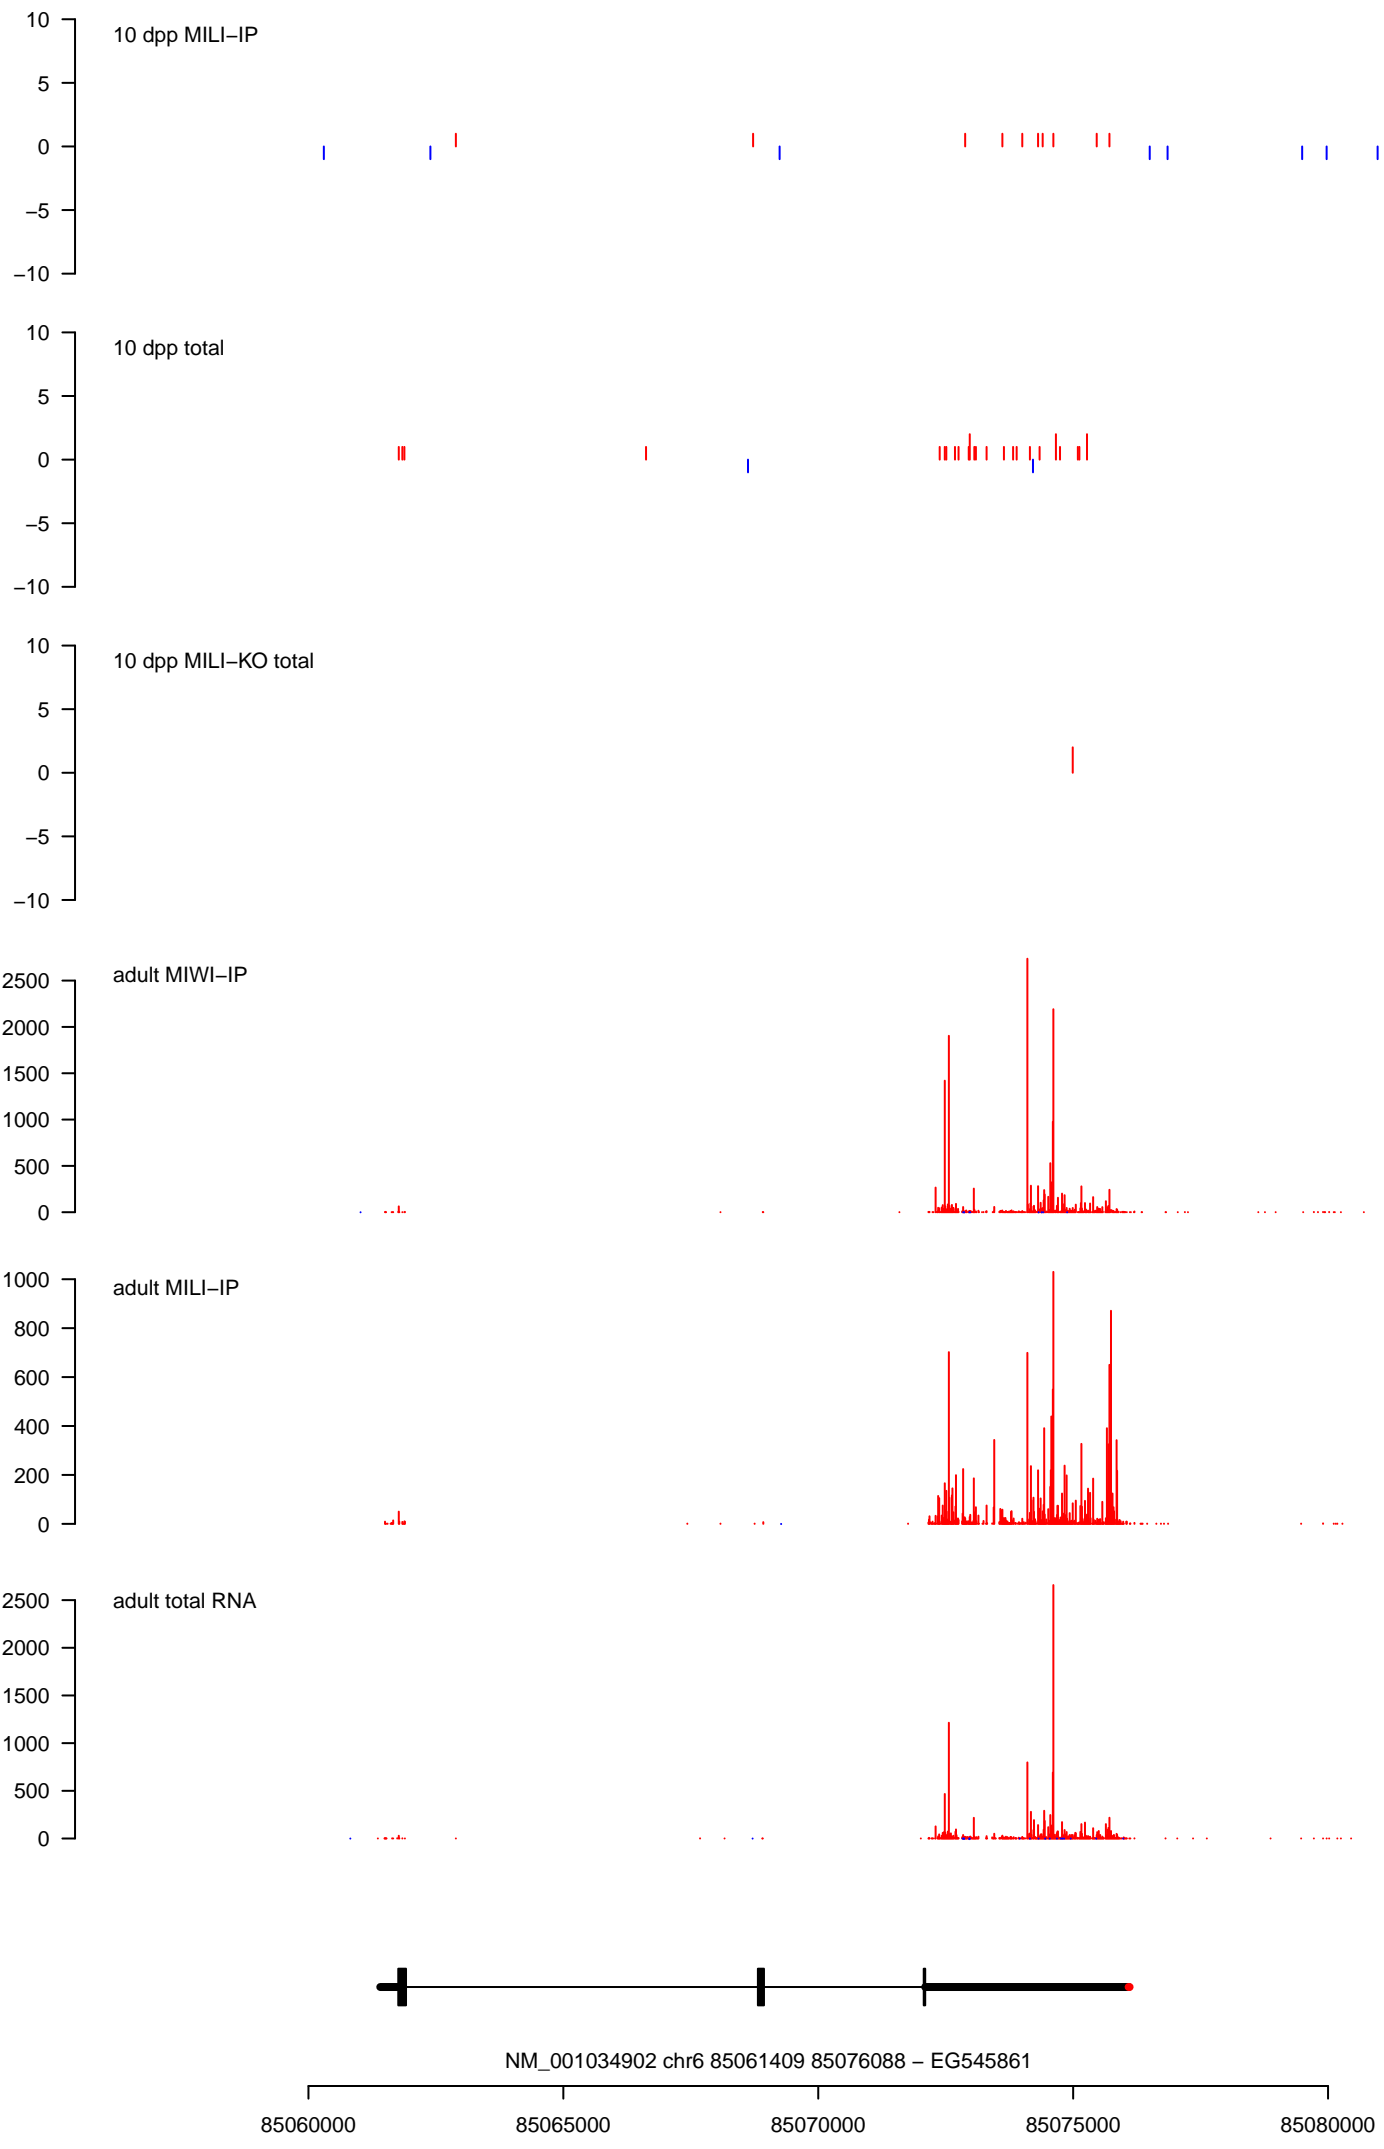

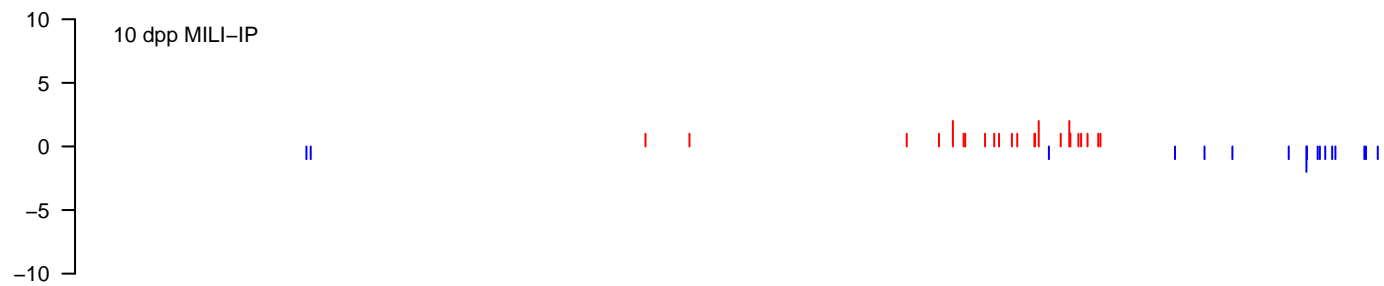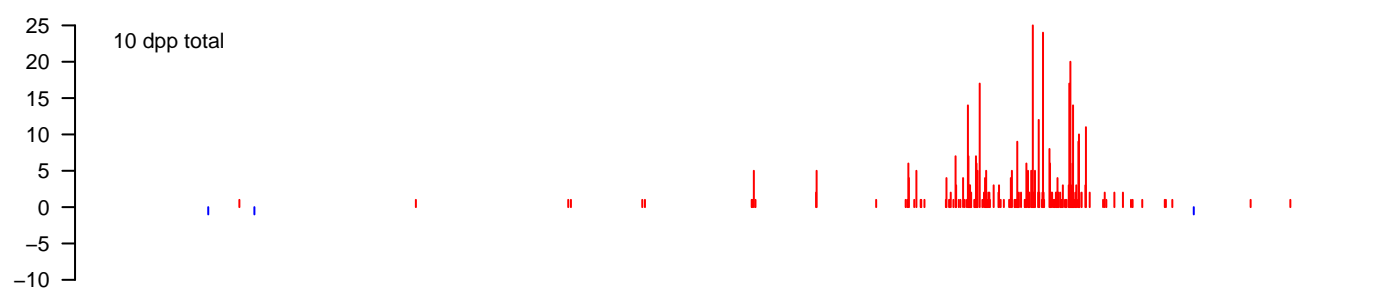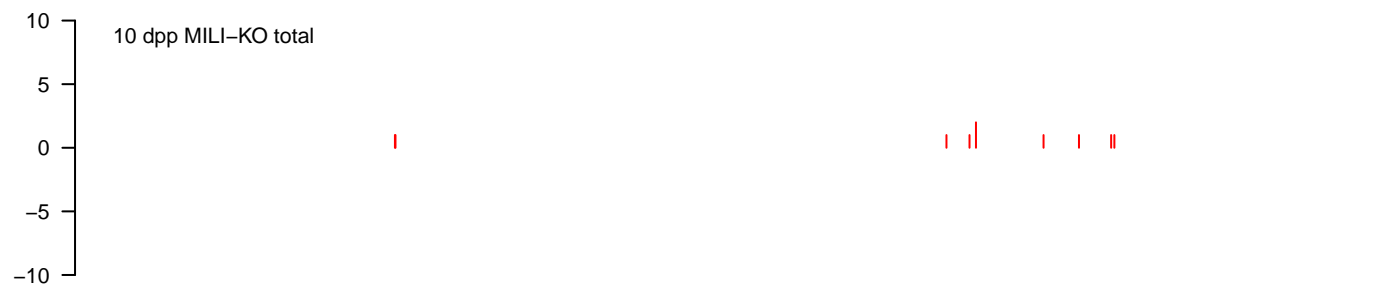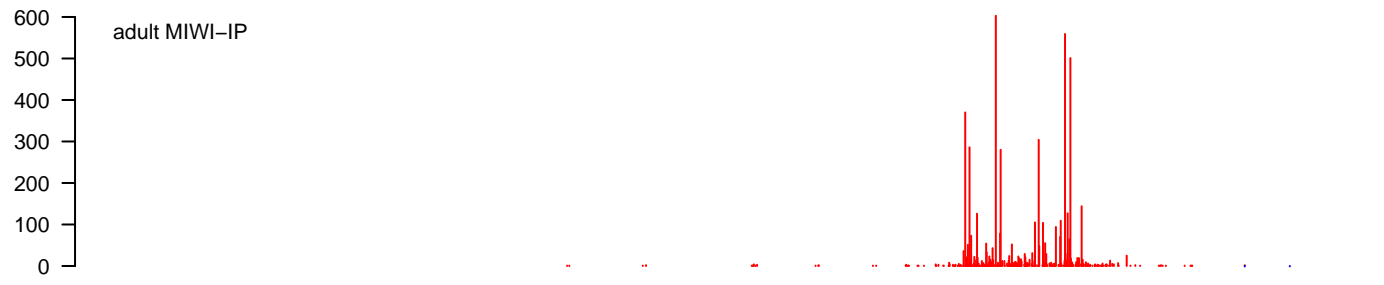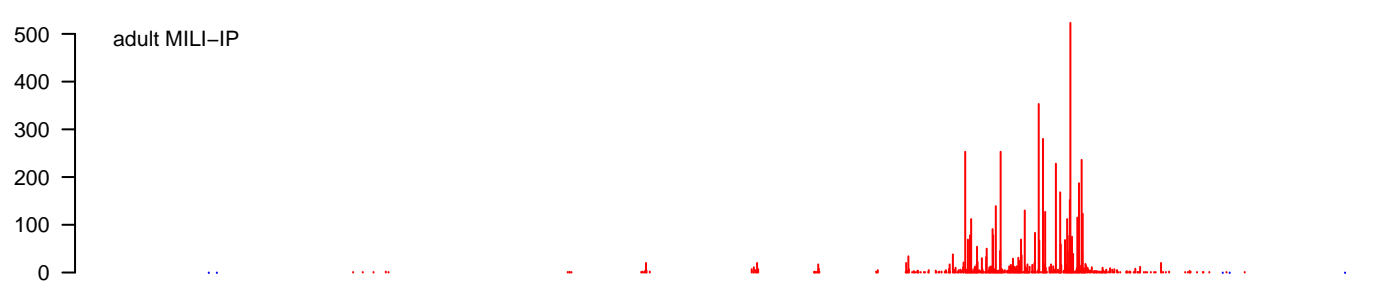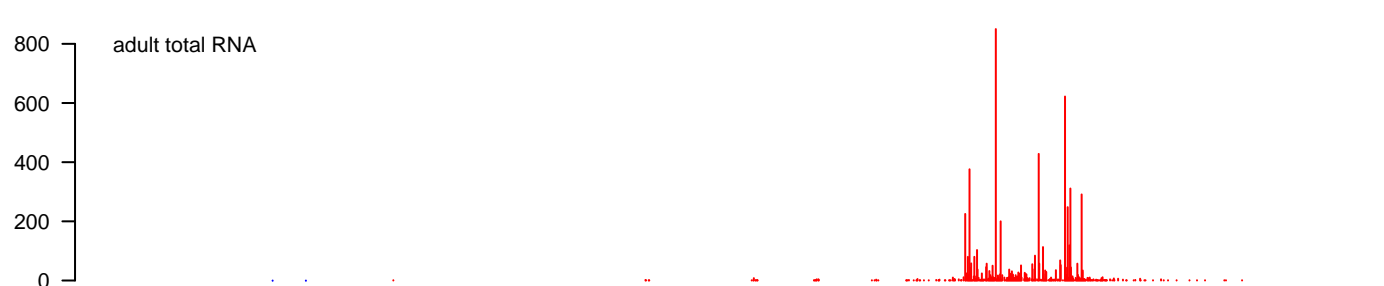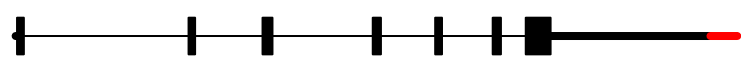

NM\_013763 chr5 135625580 135639032 + Tbl2

135620000 135625000 135630000 135635000 135640000

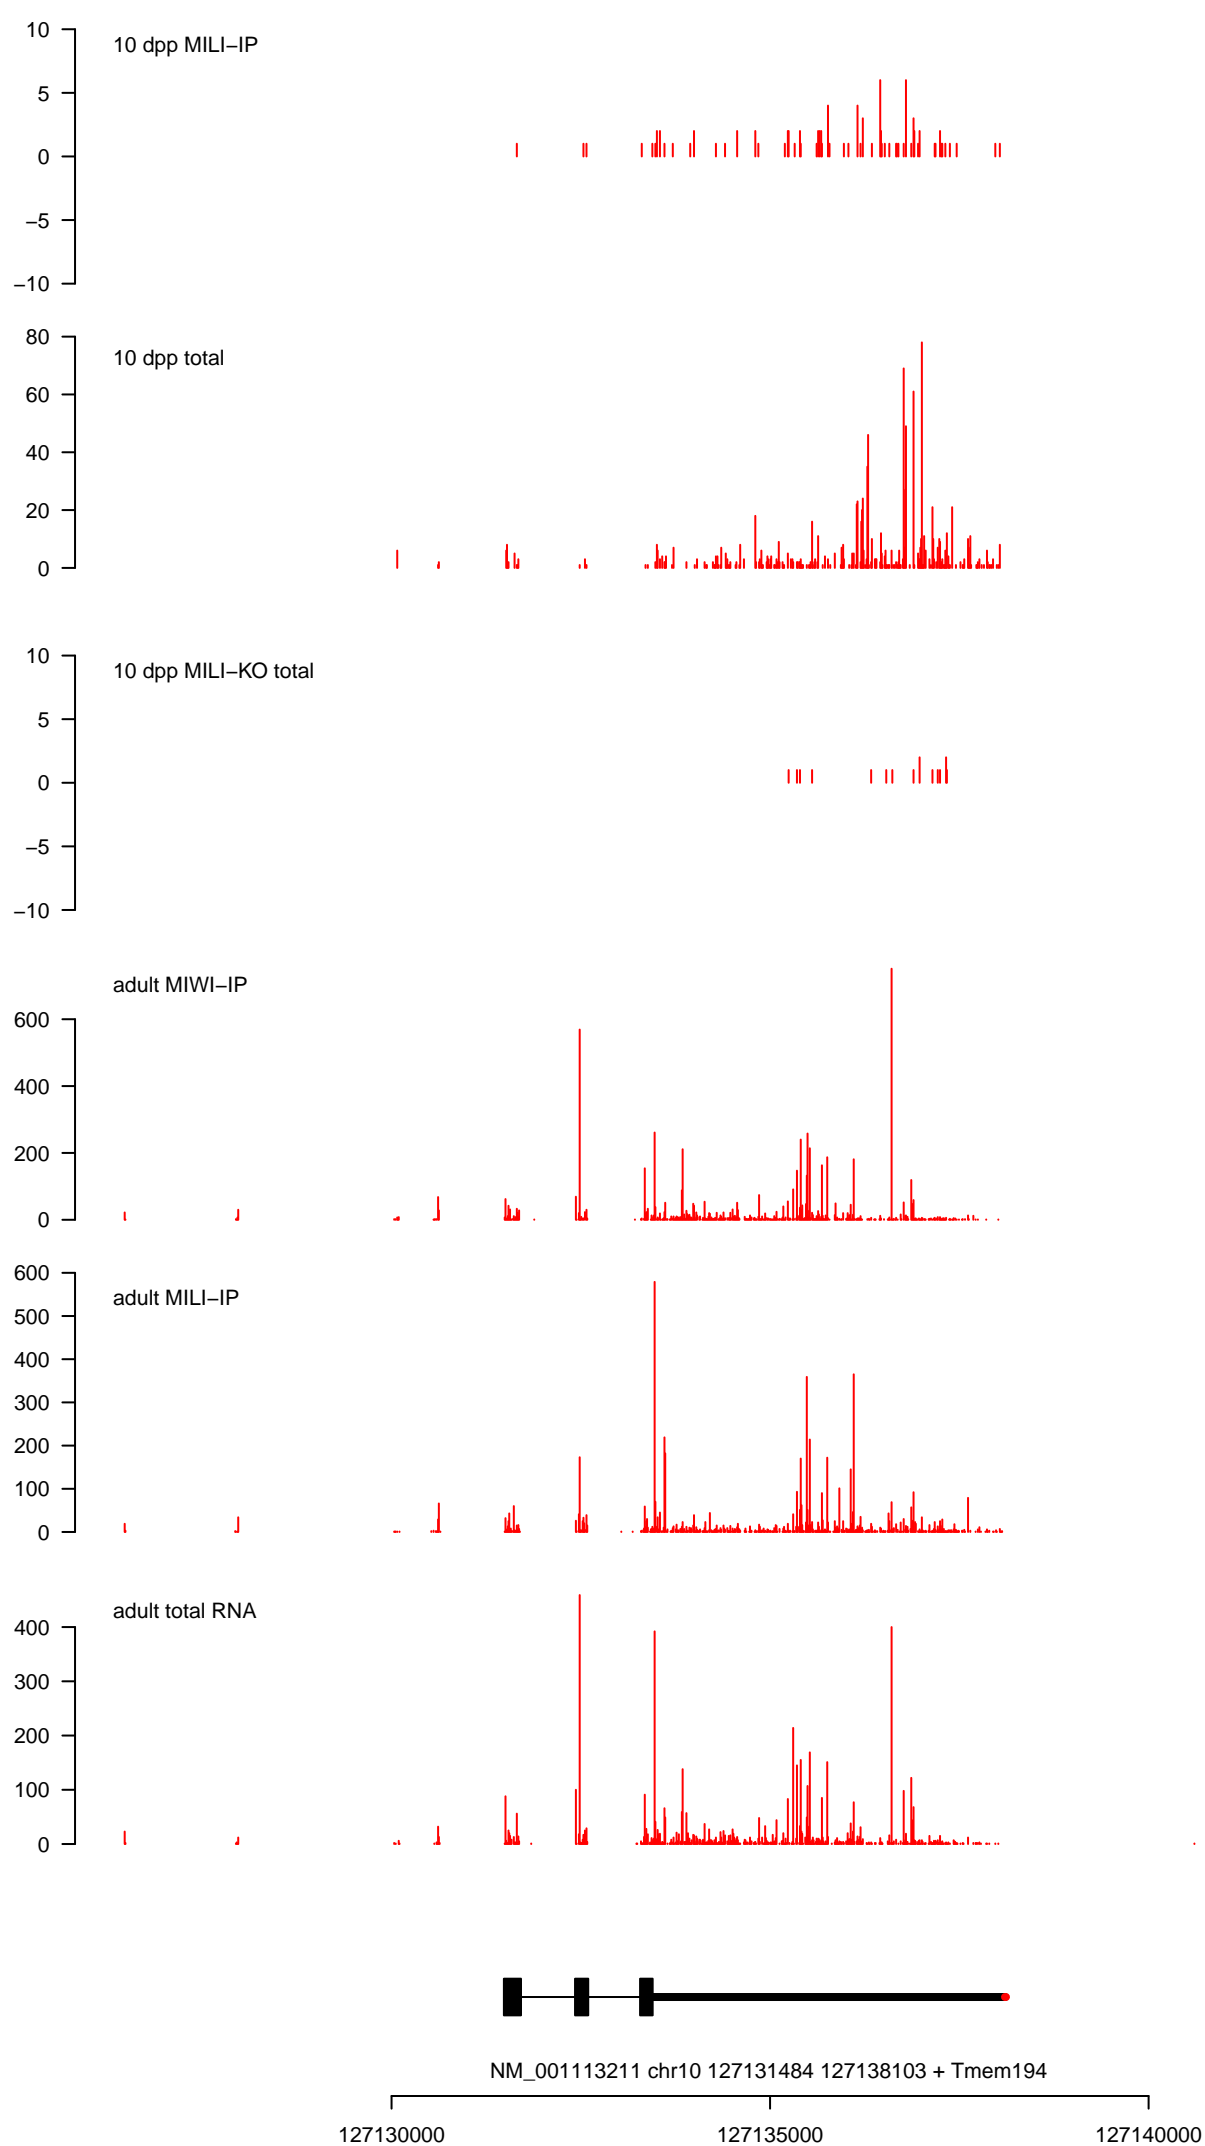



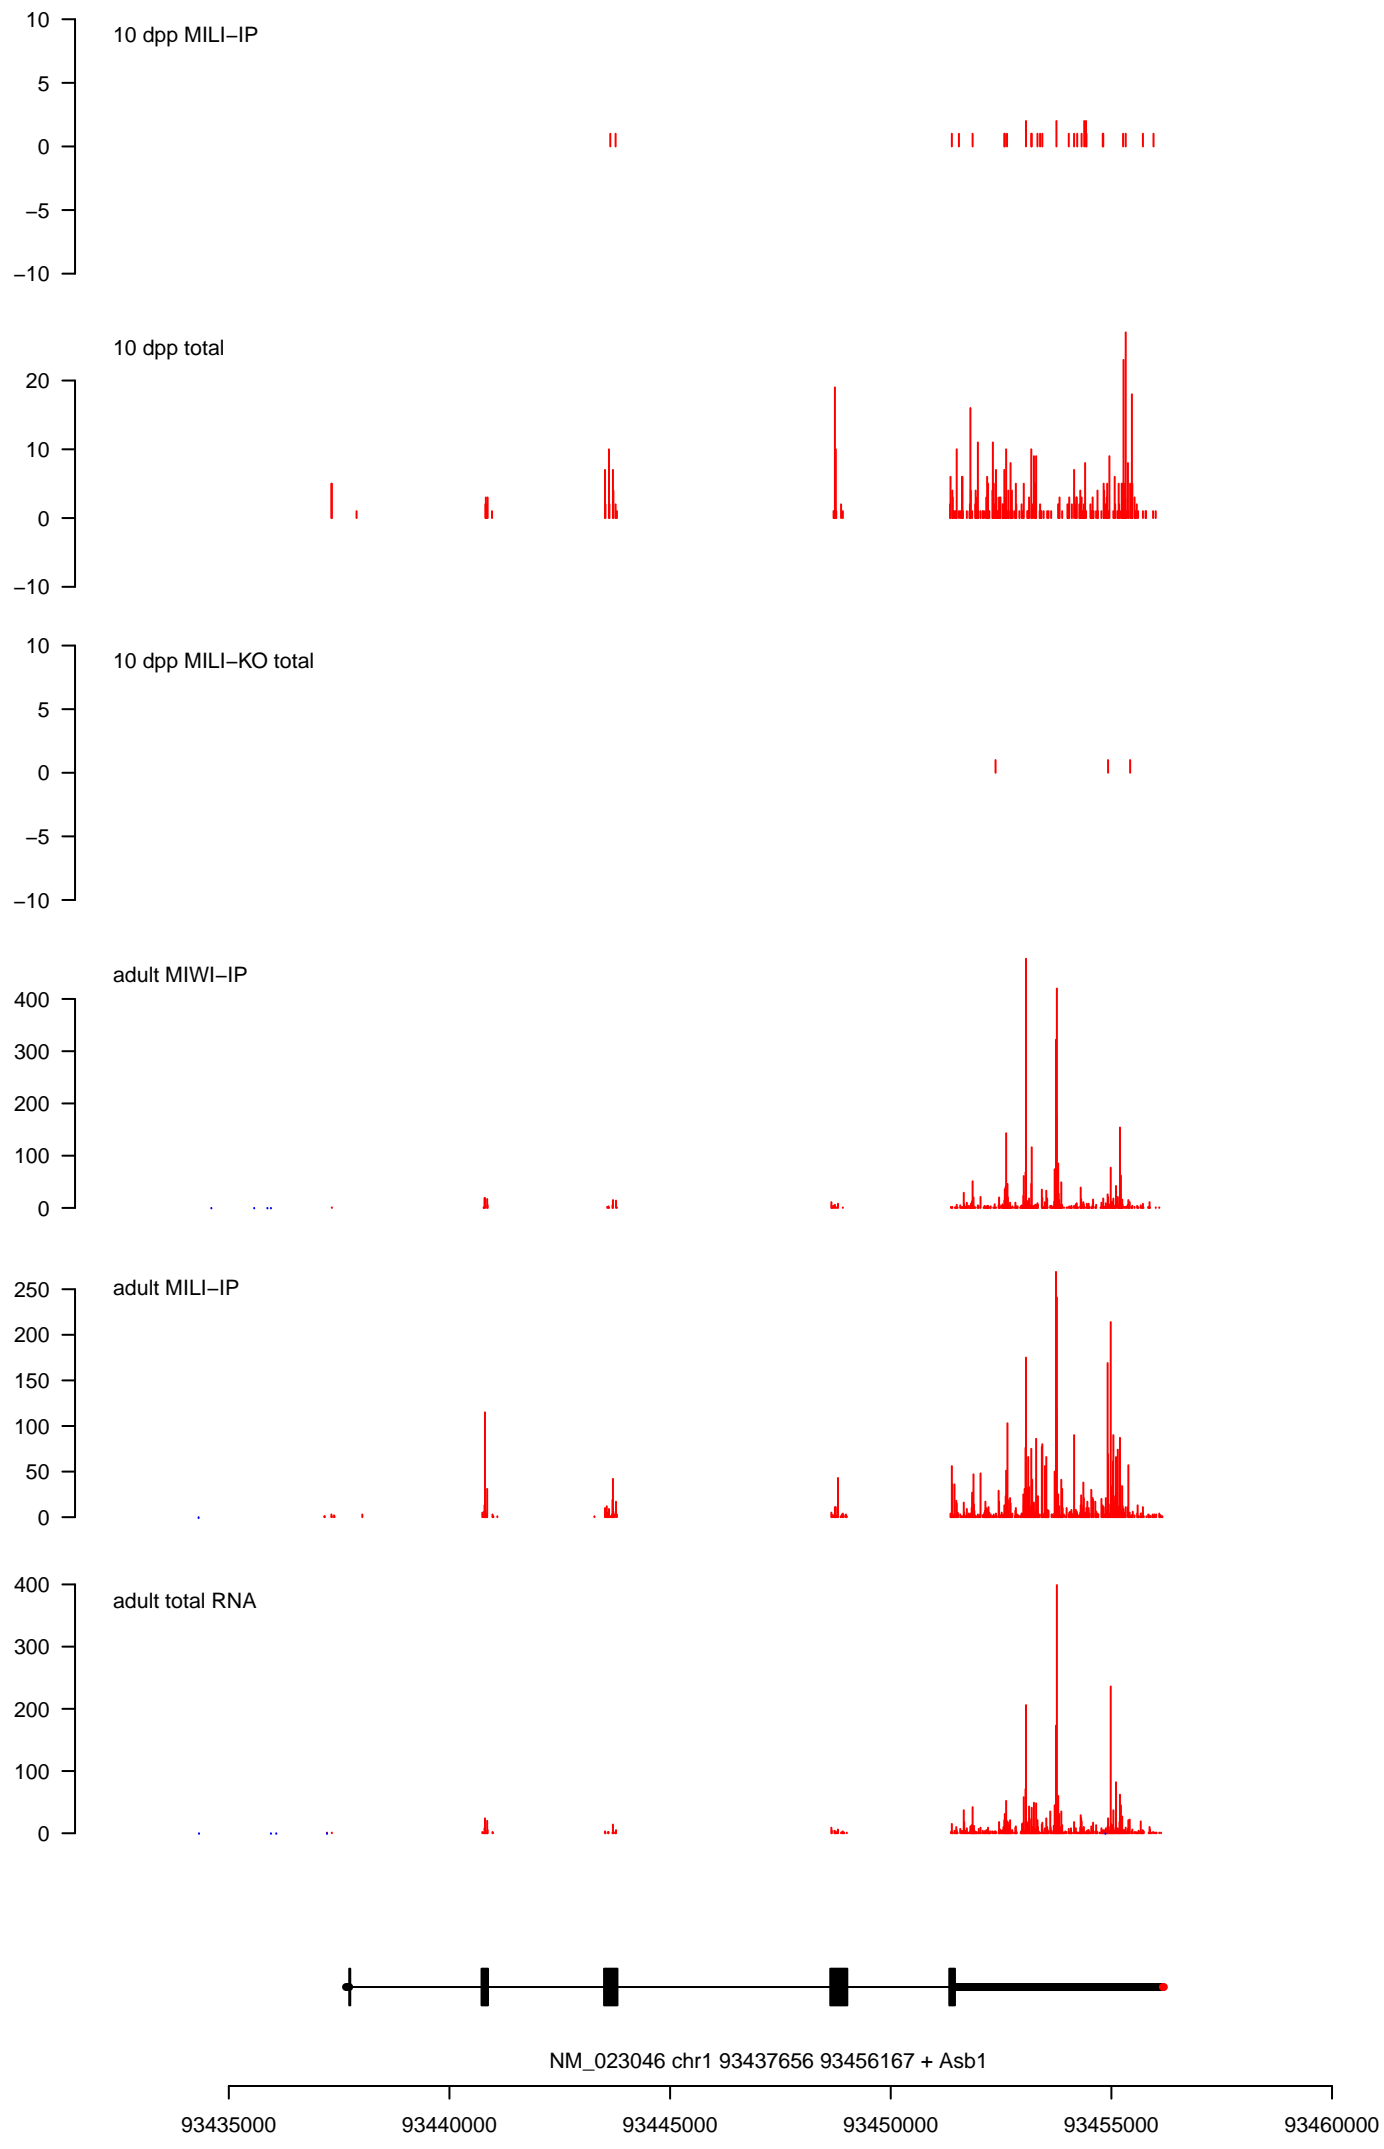

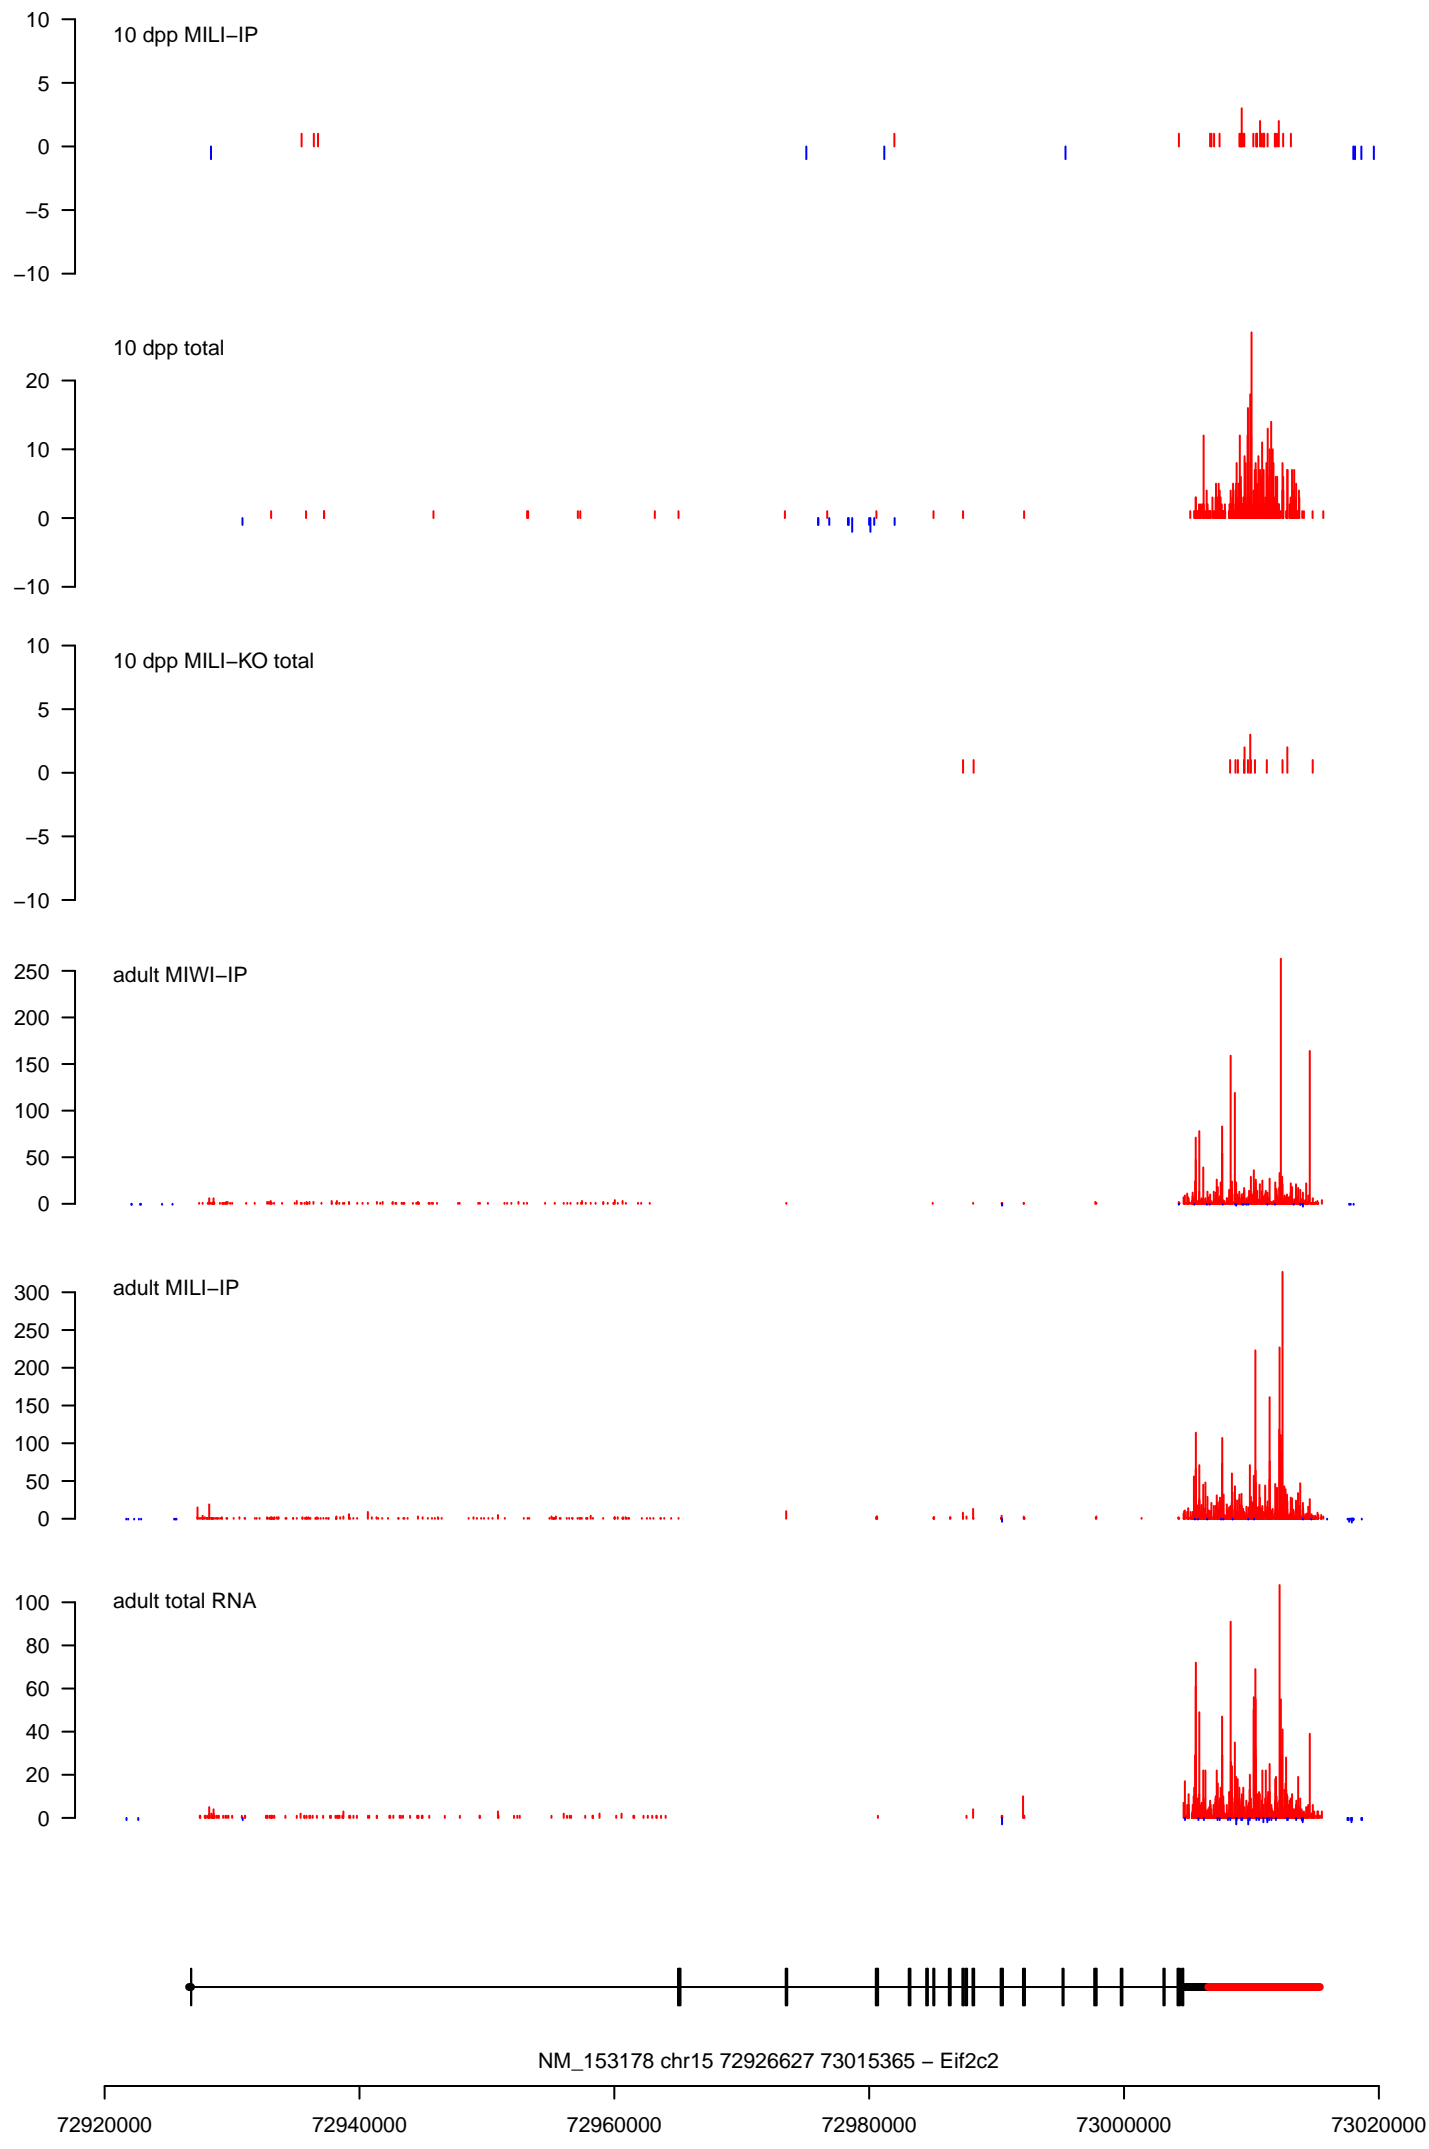

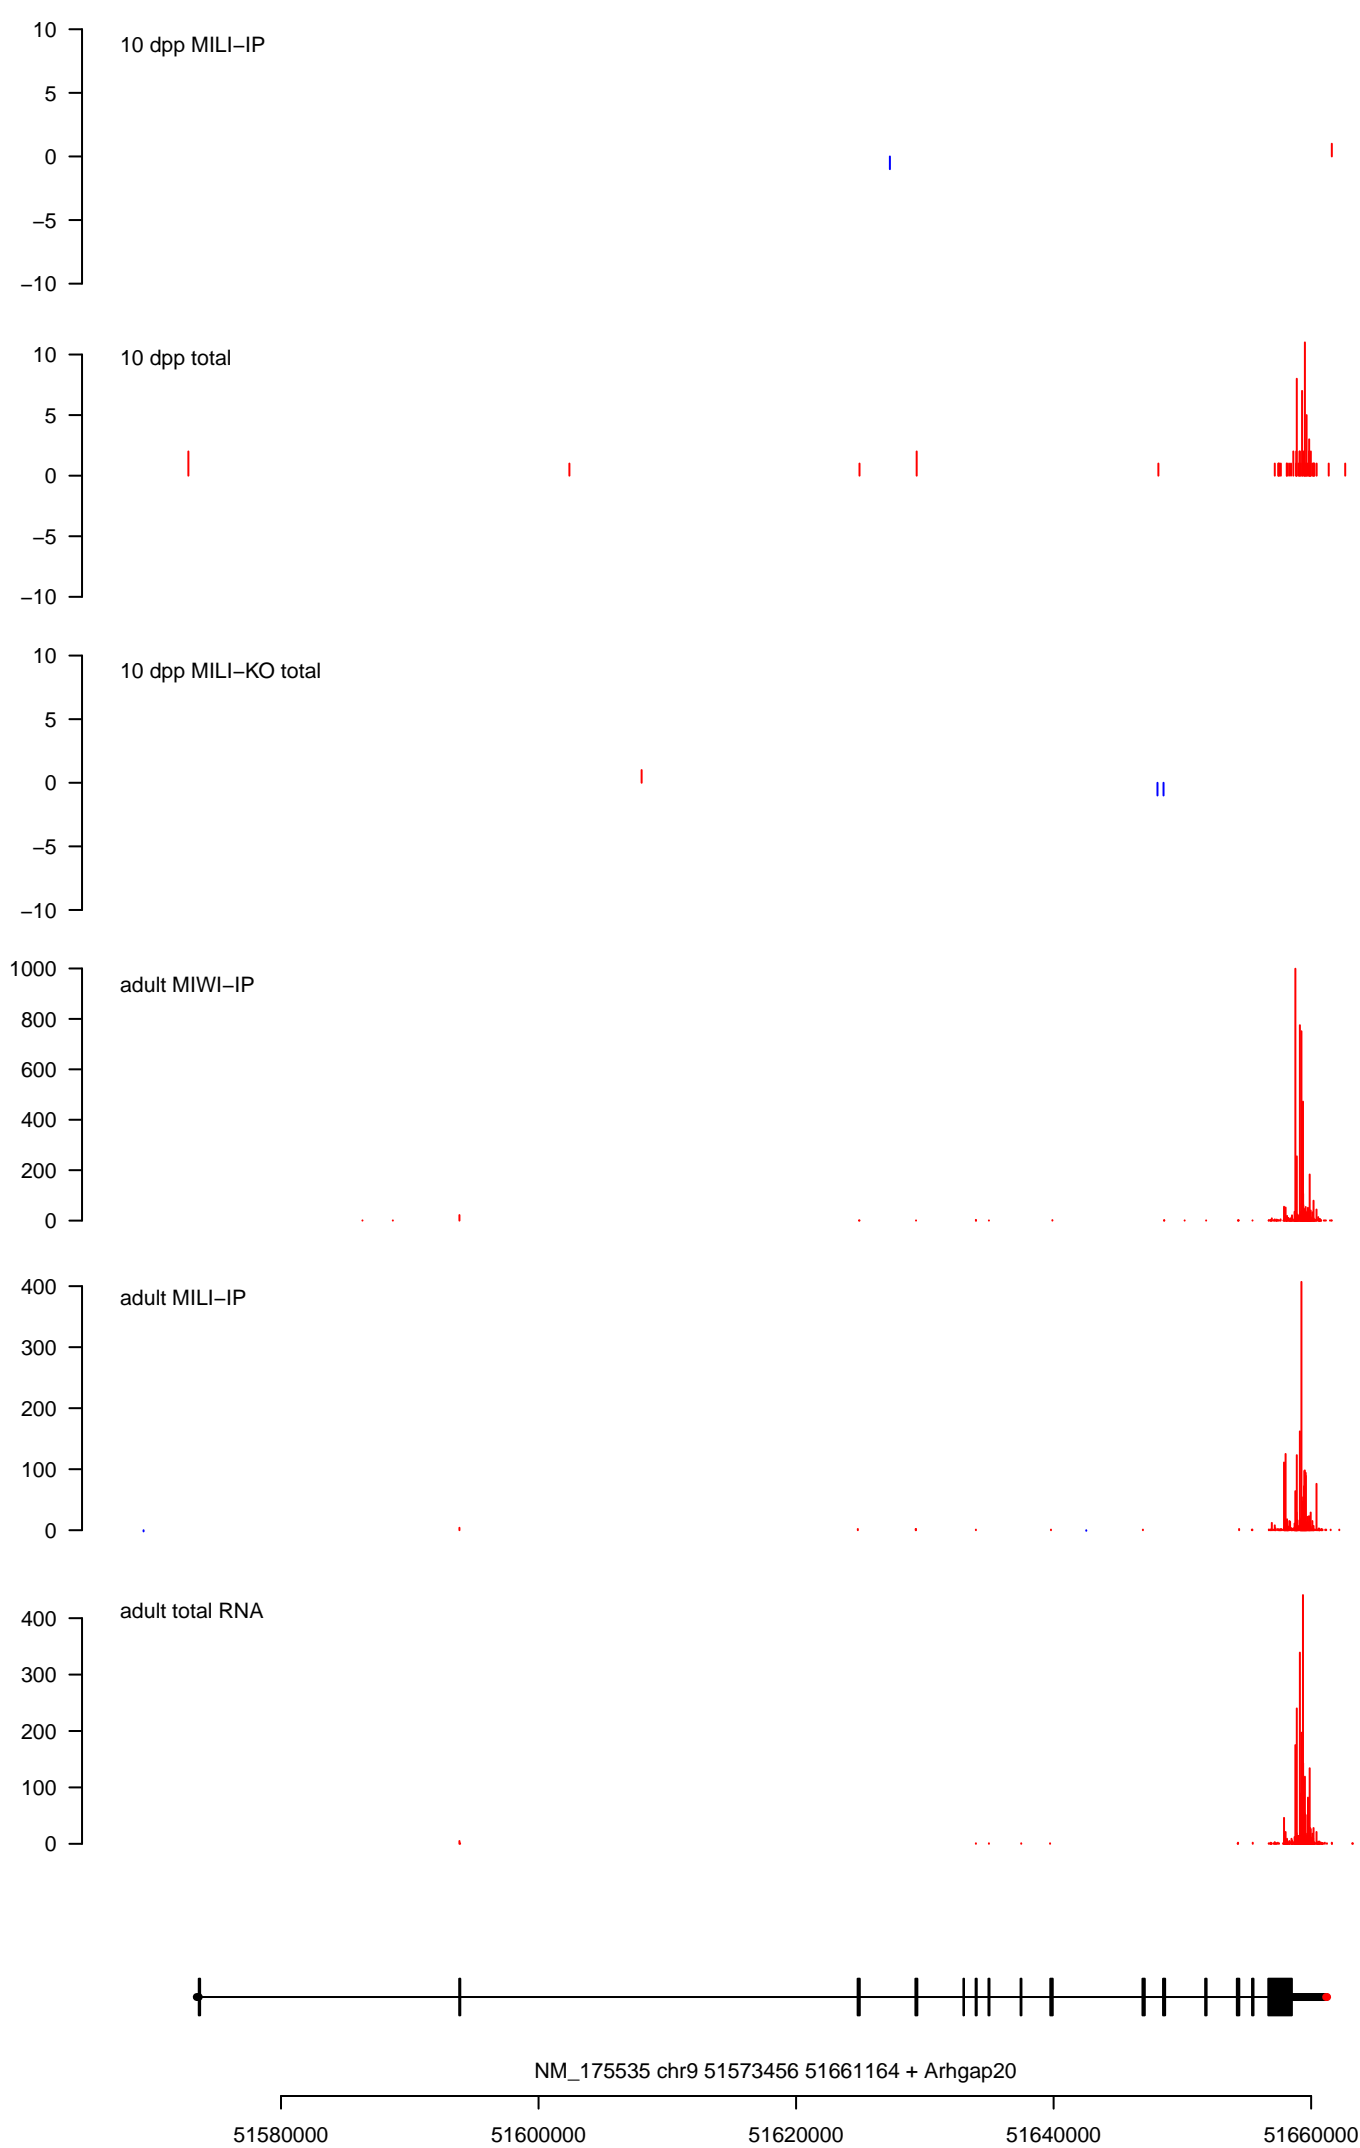

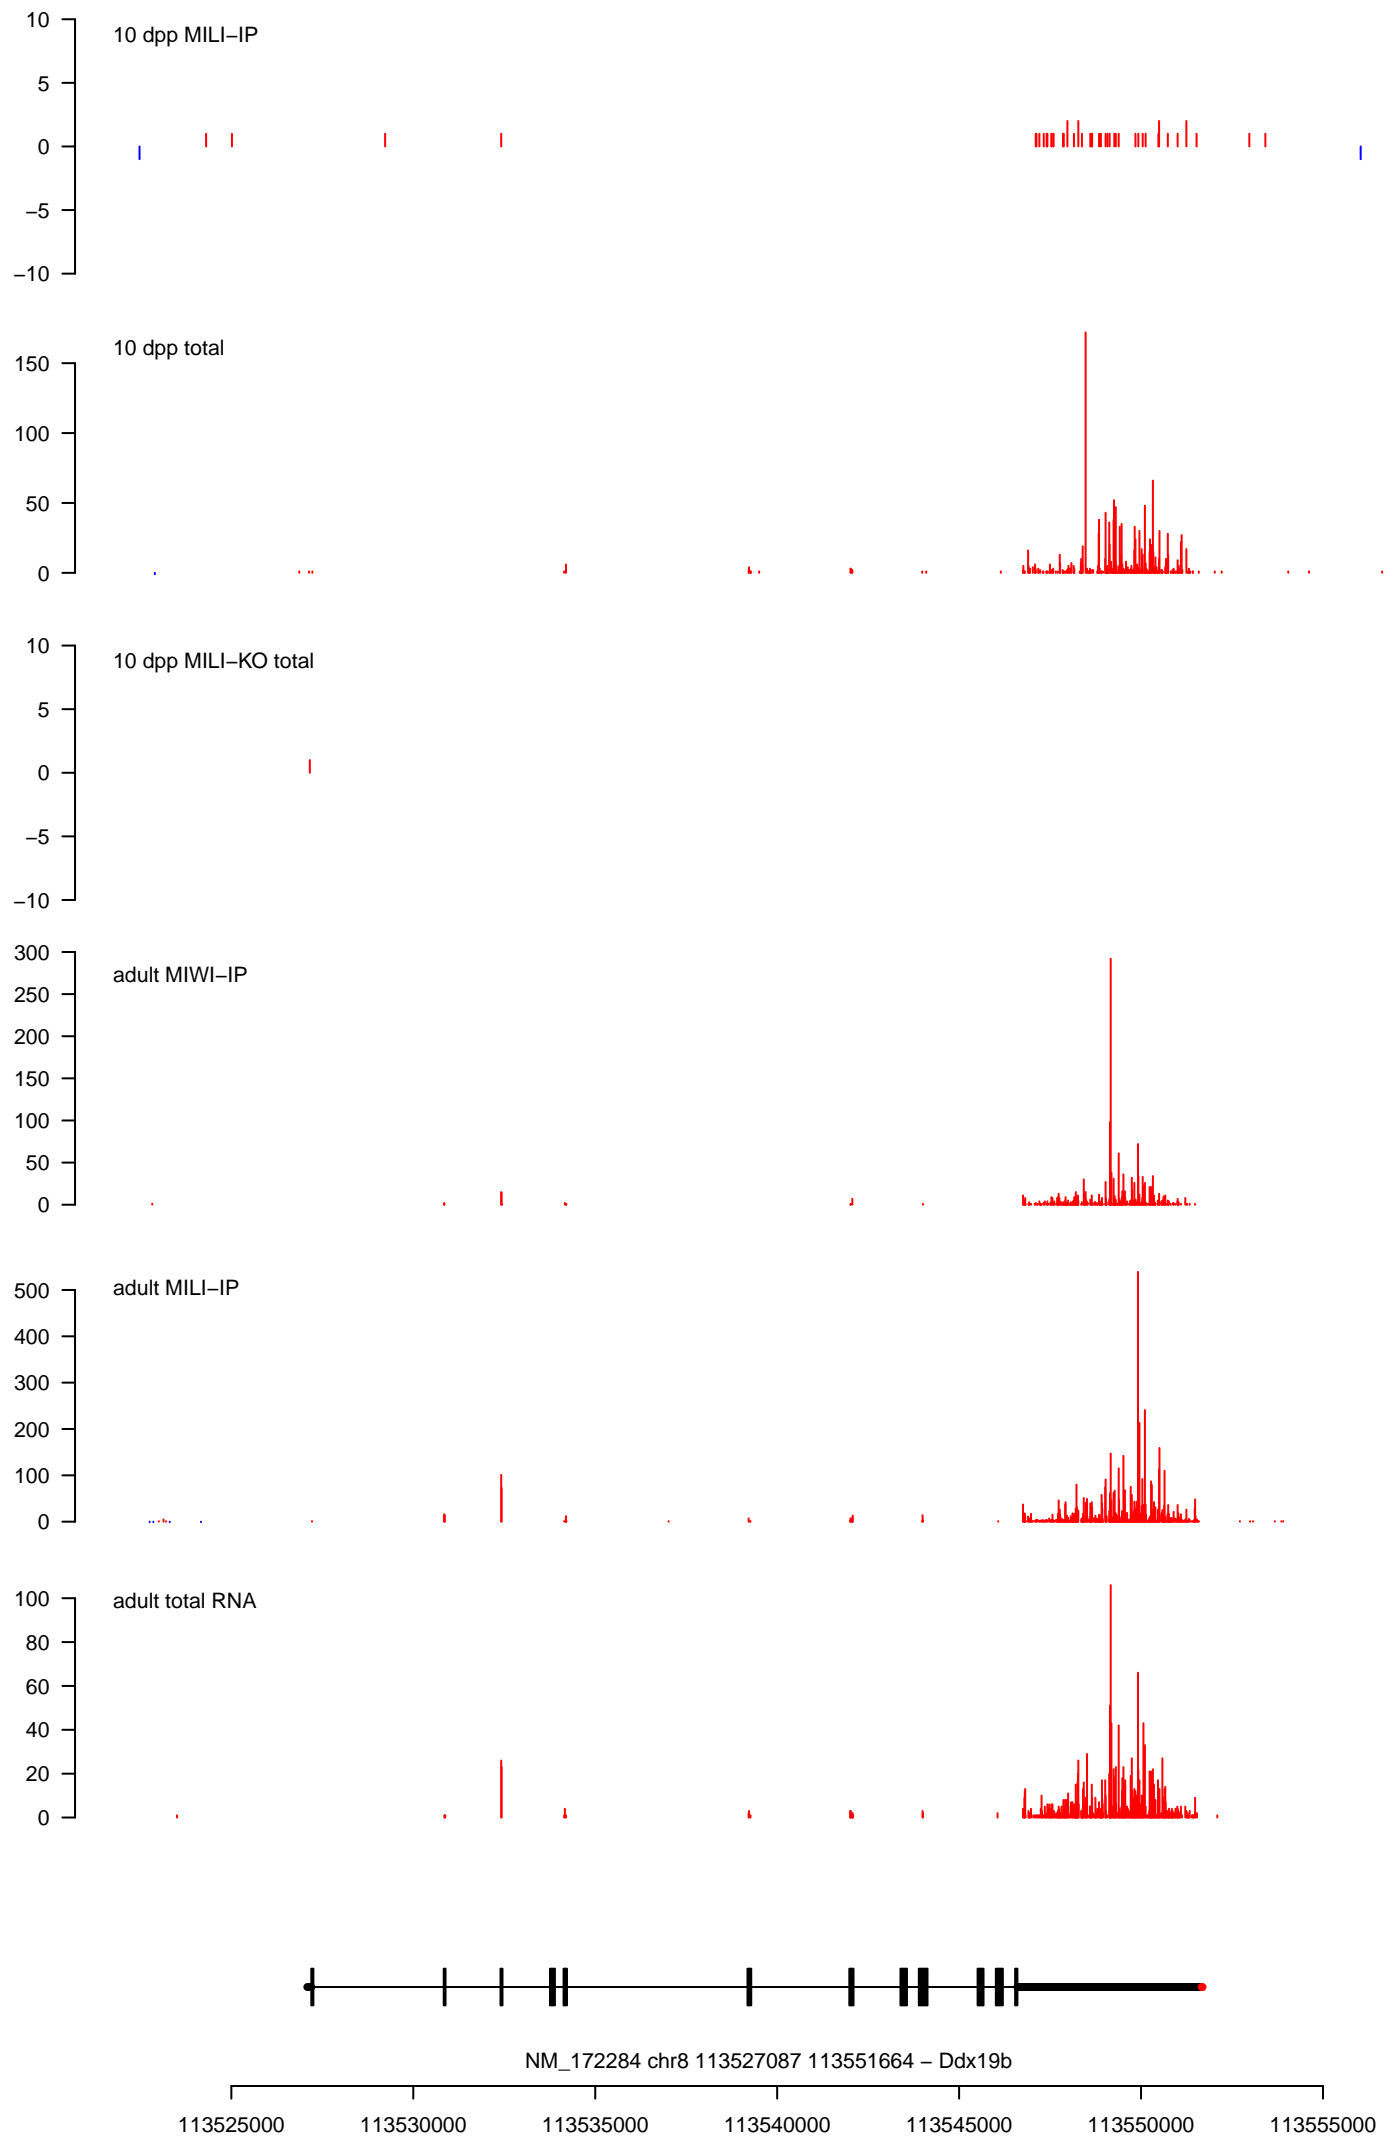

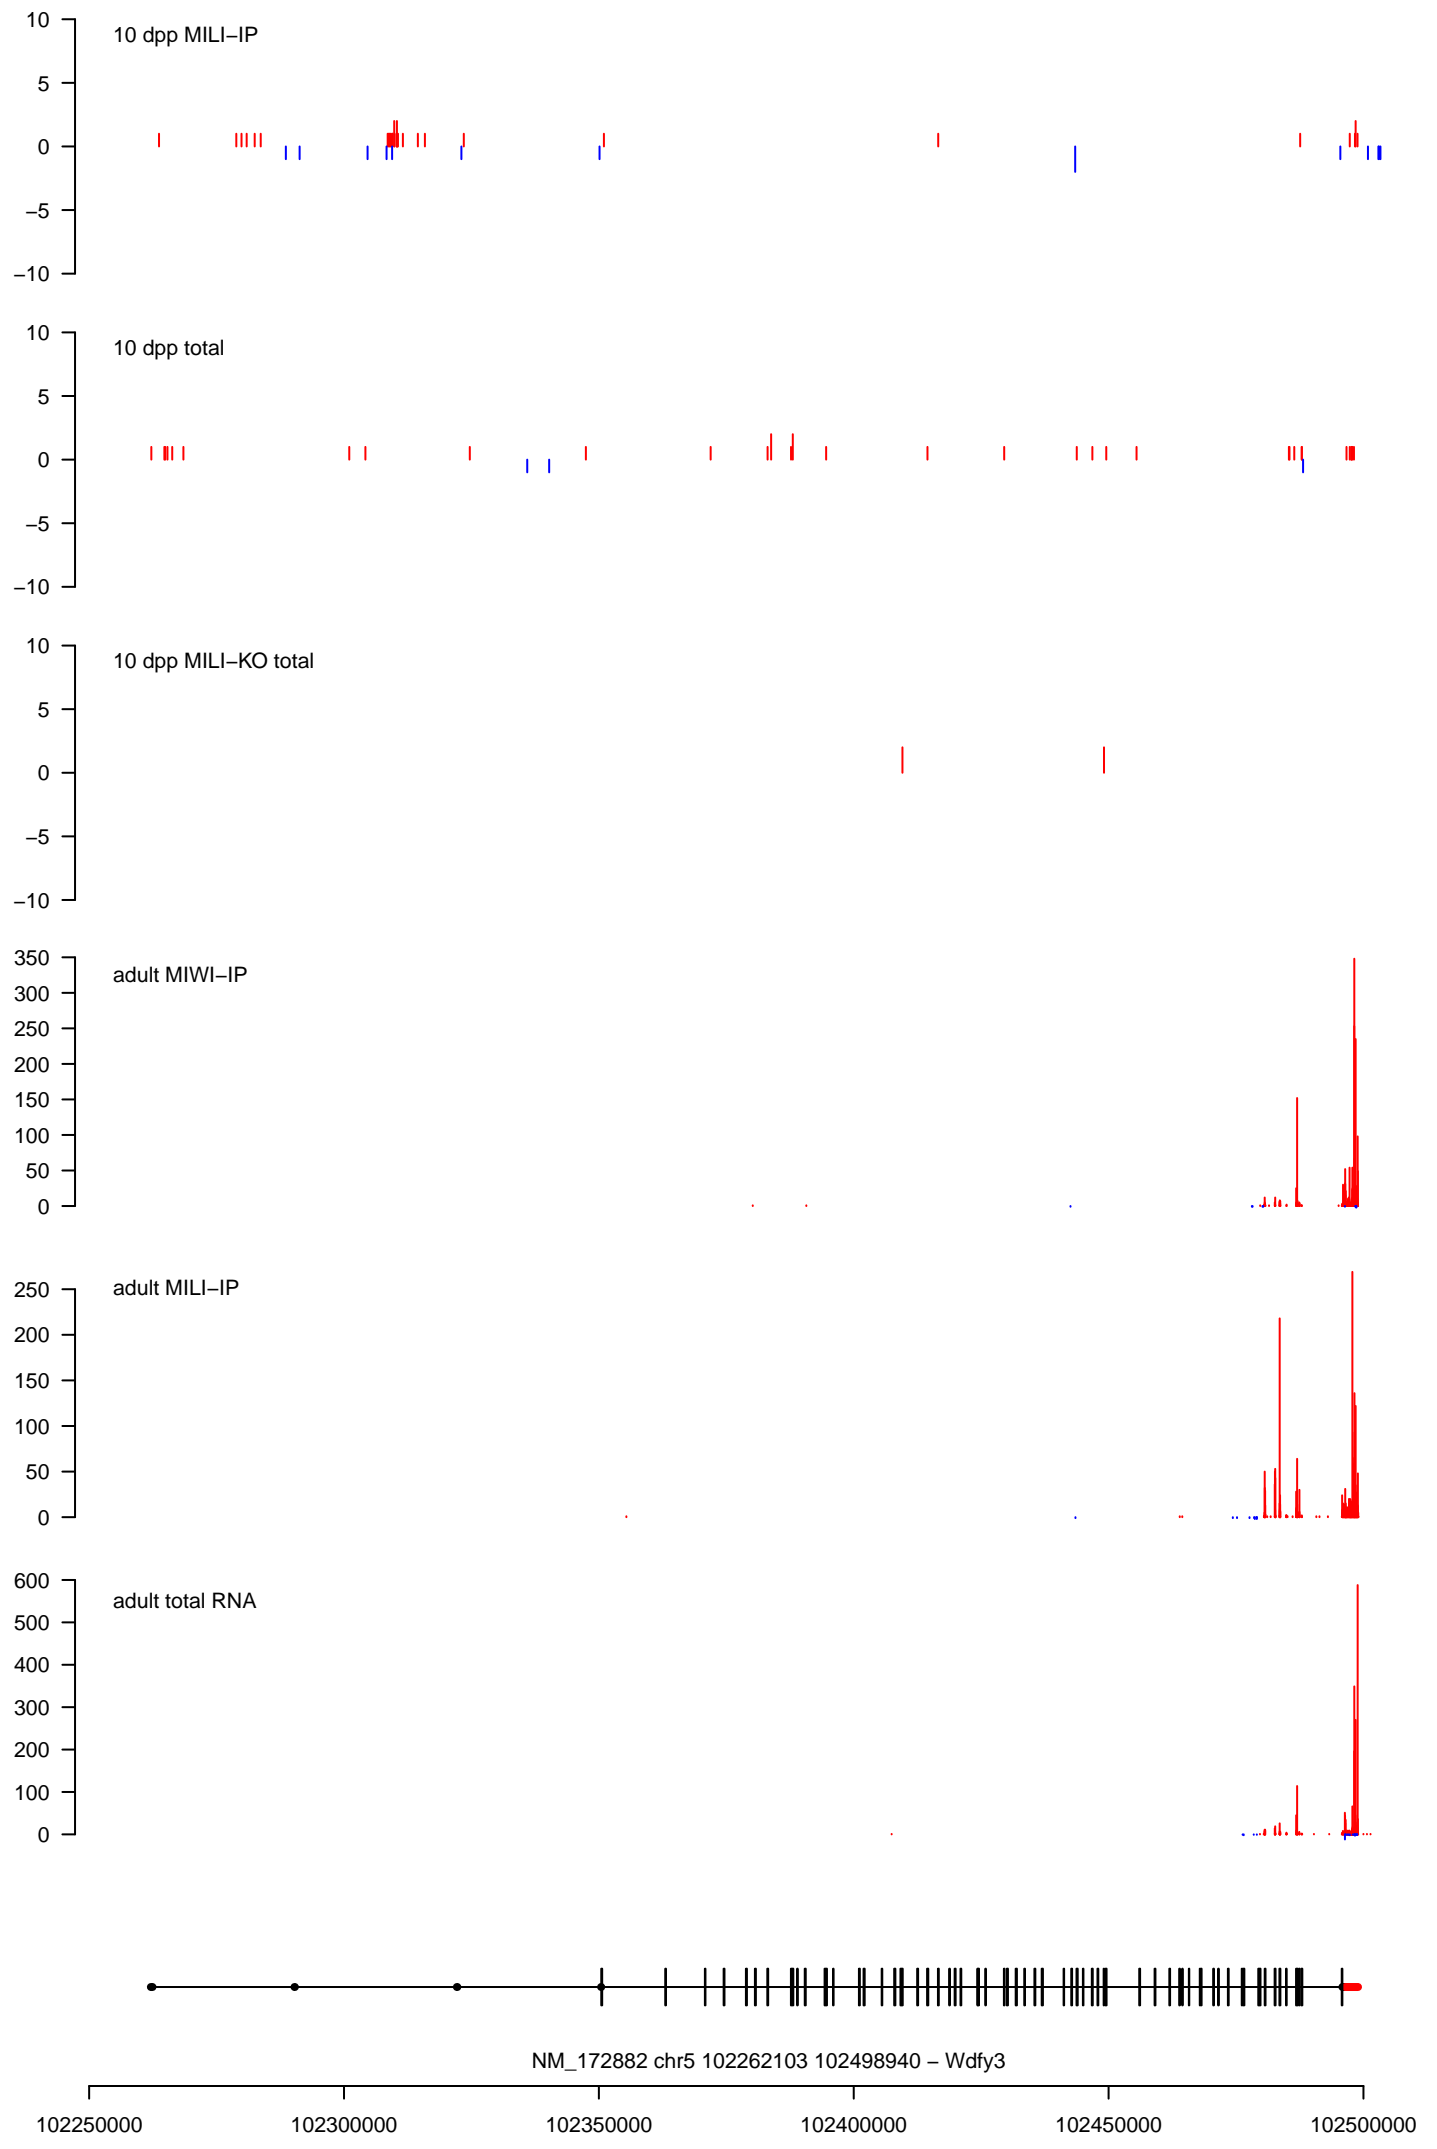

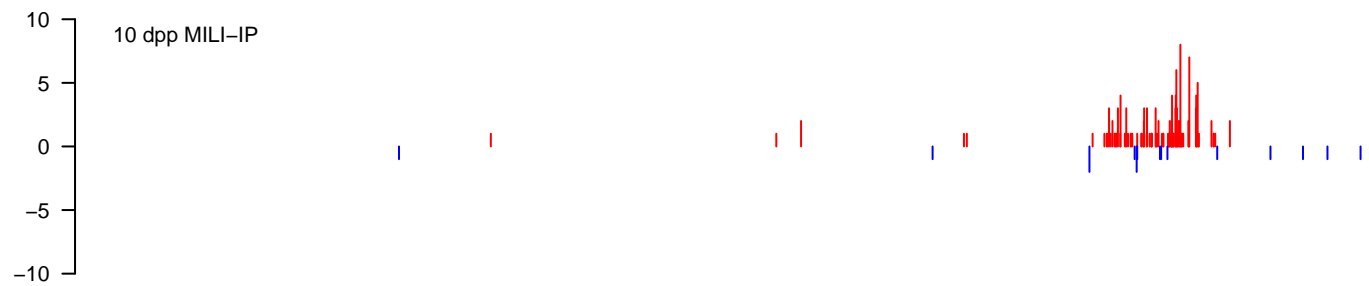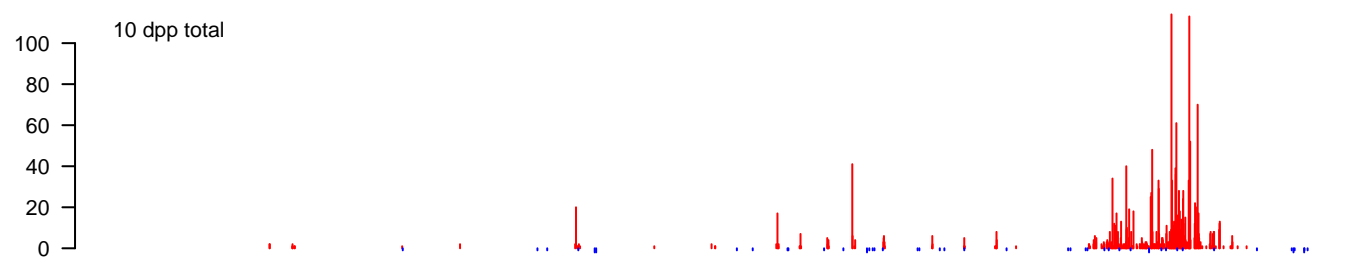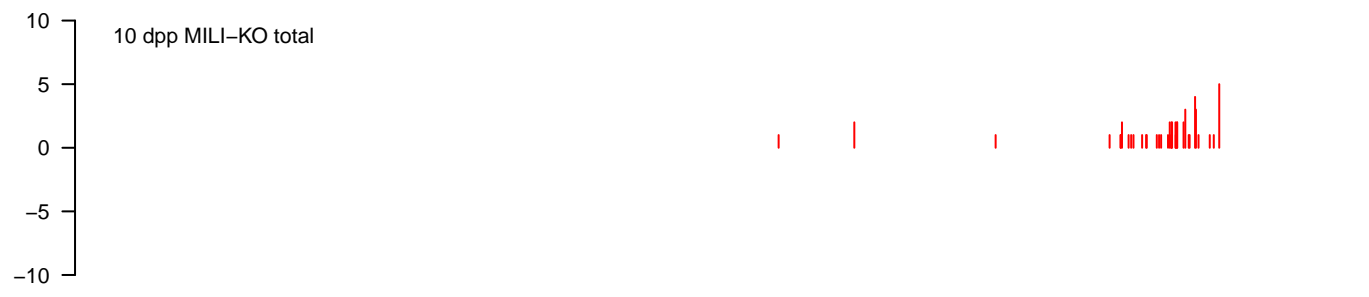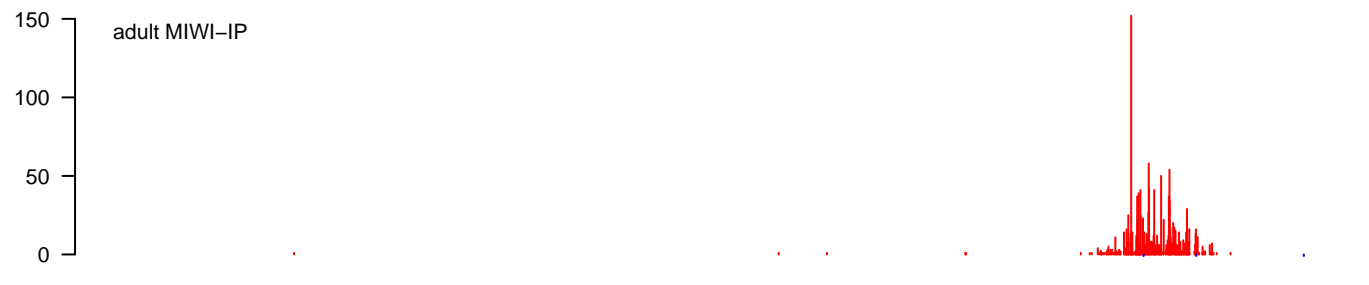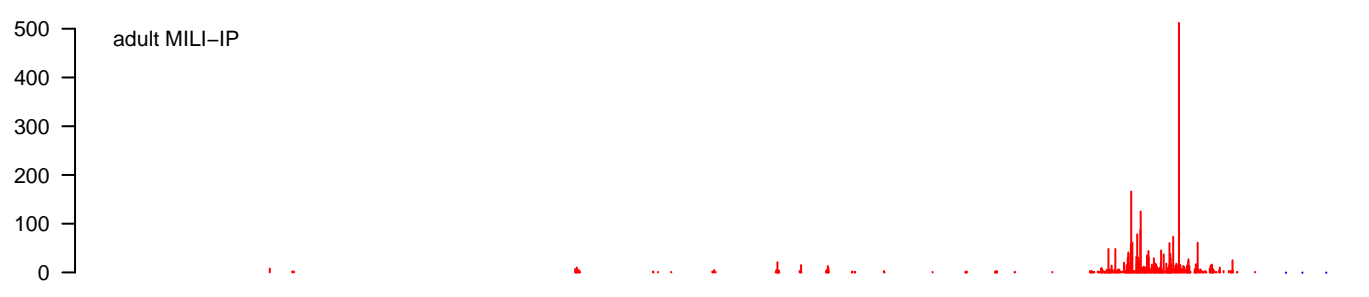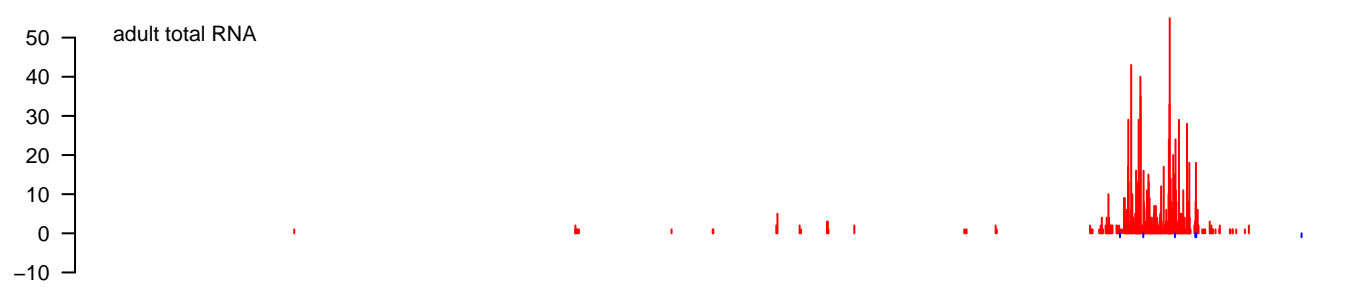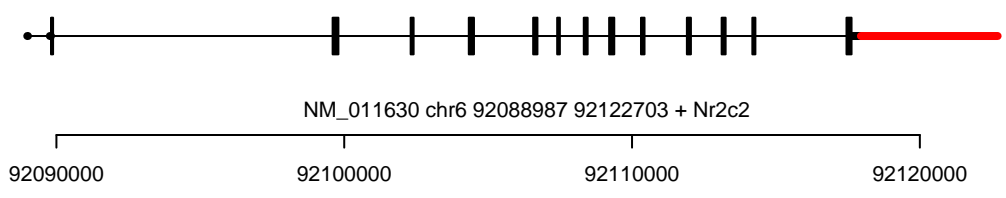

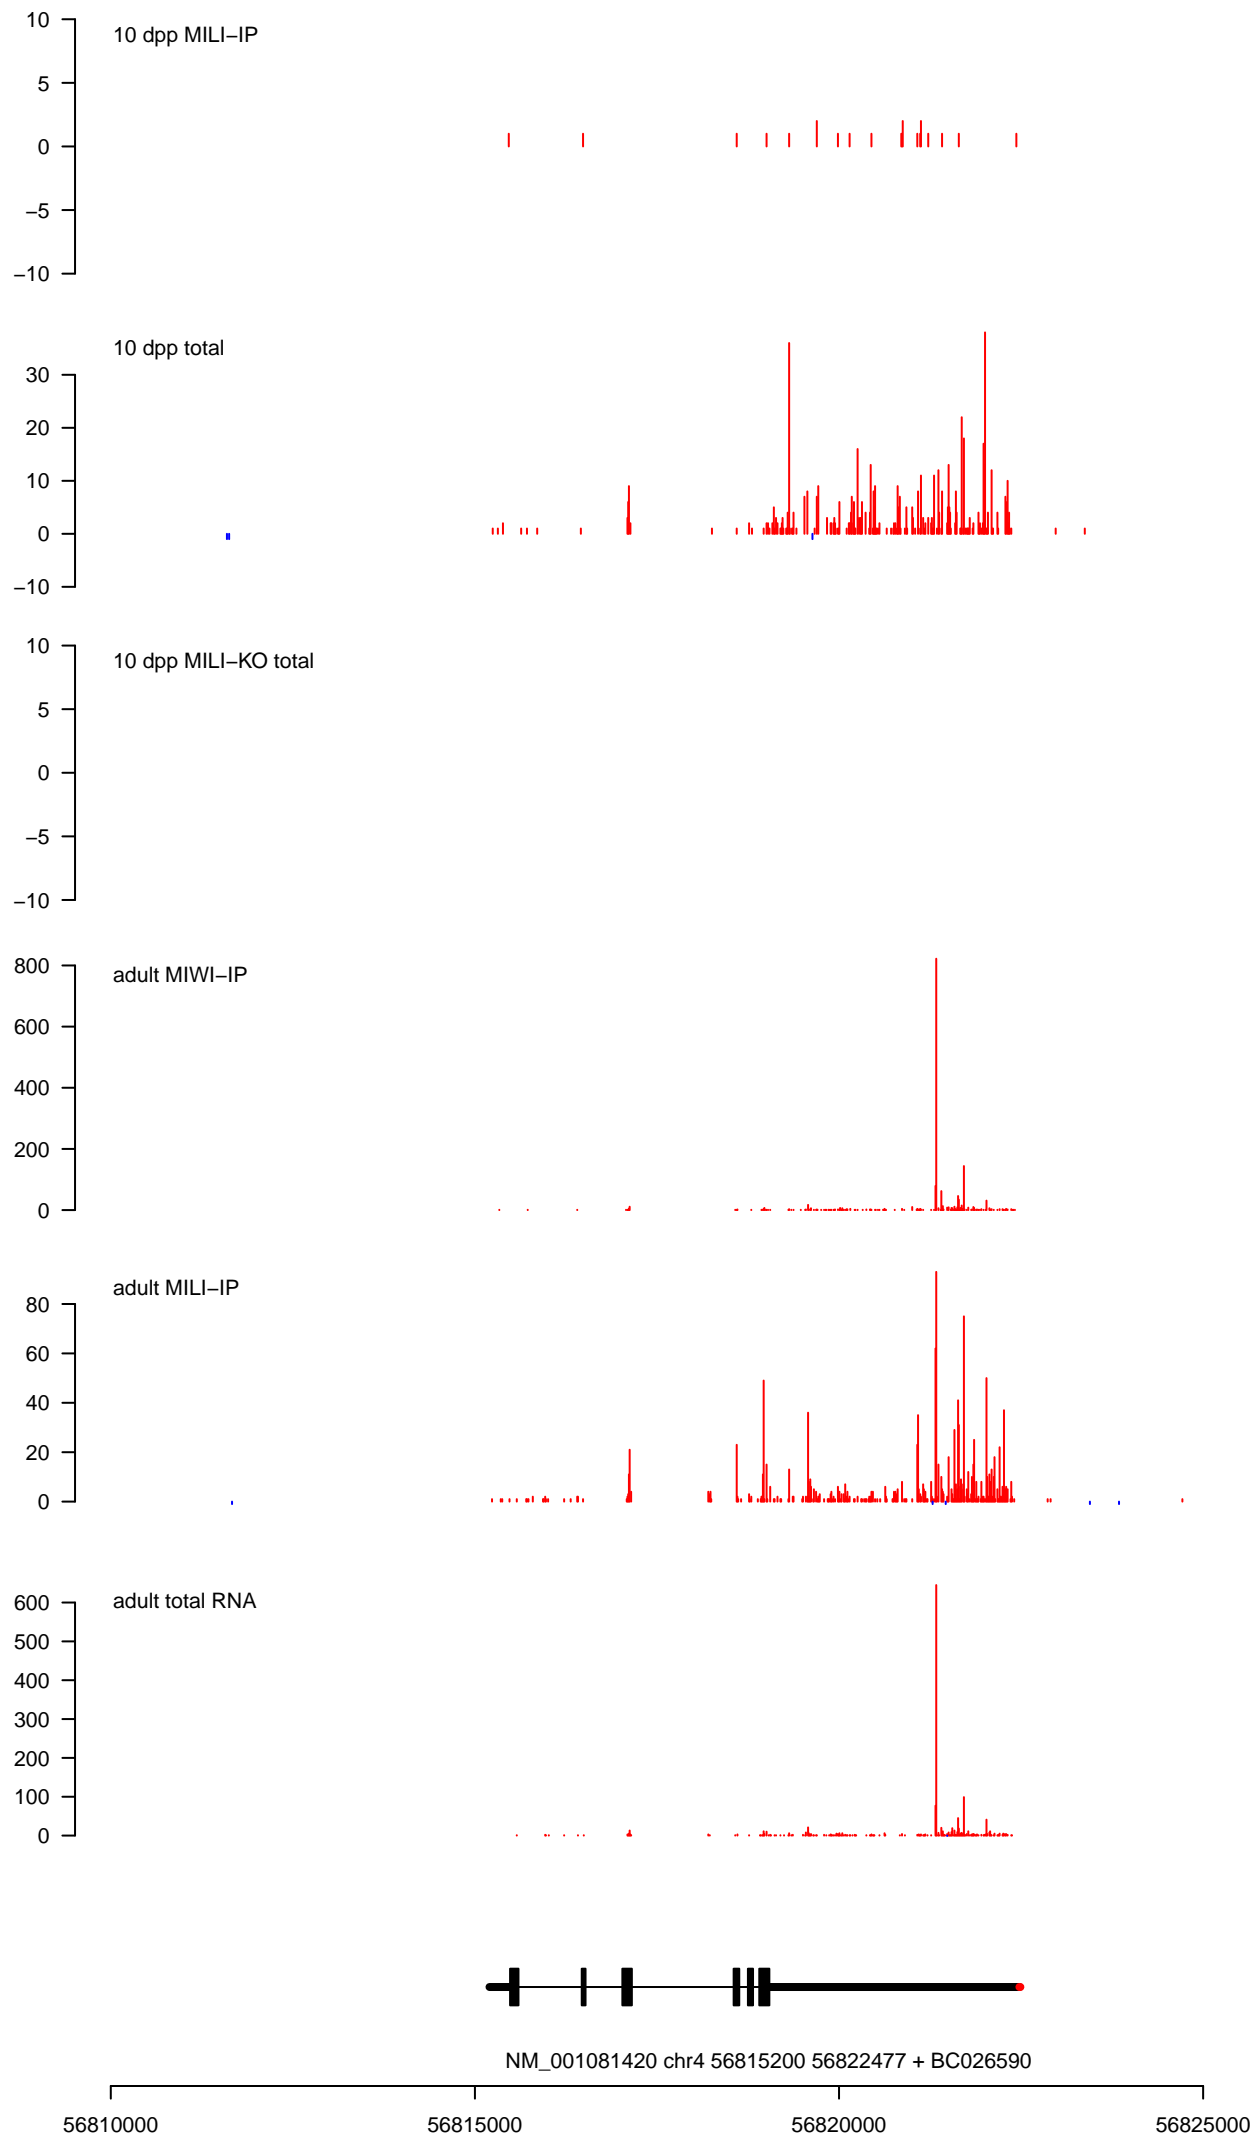

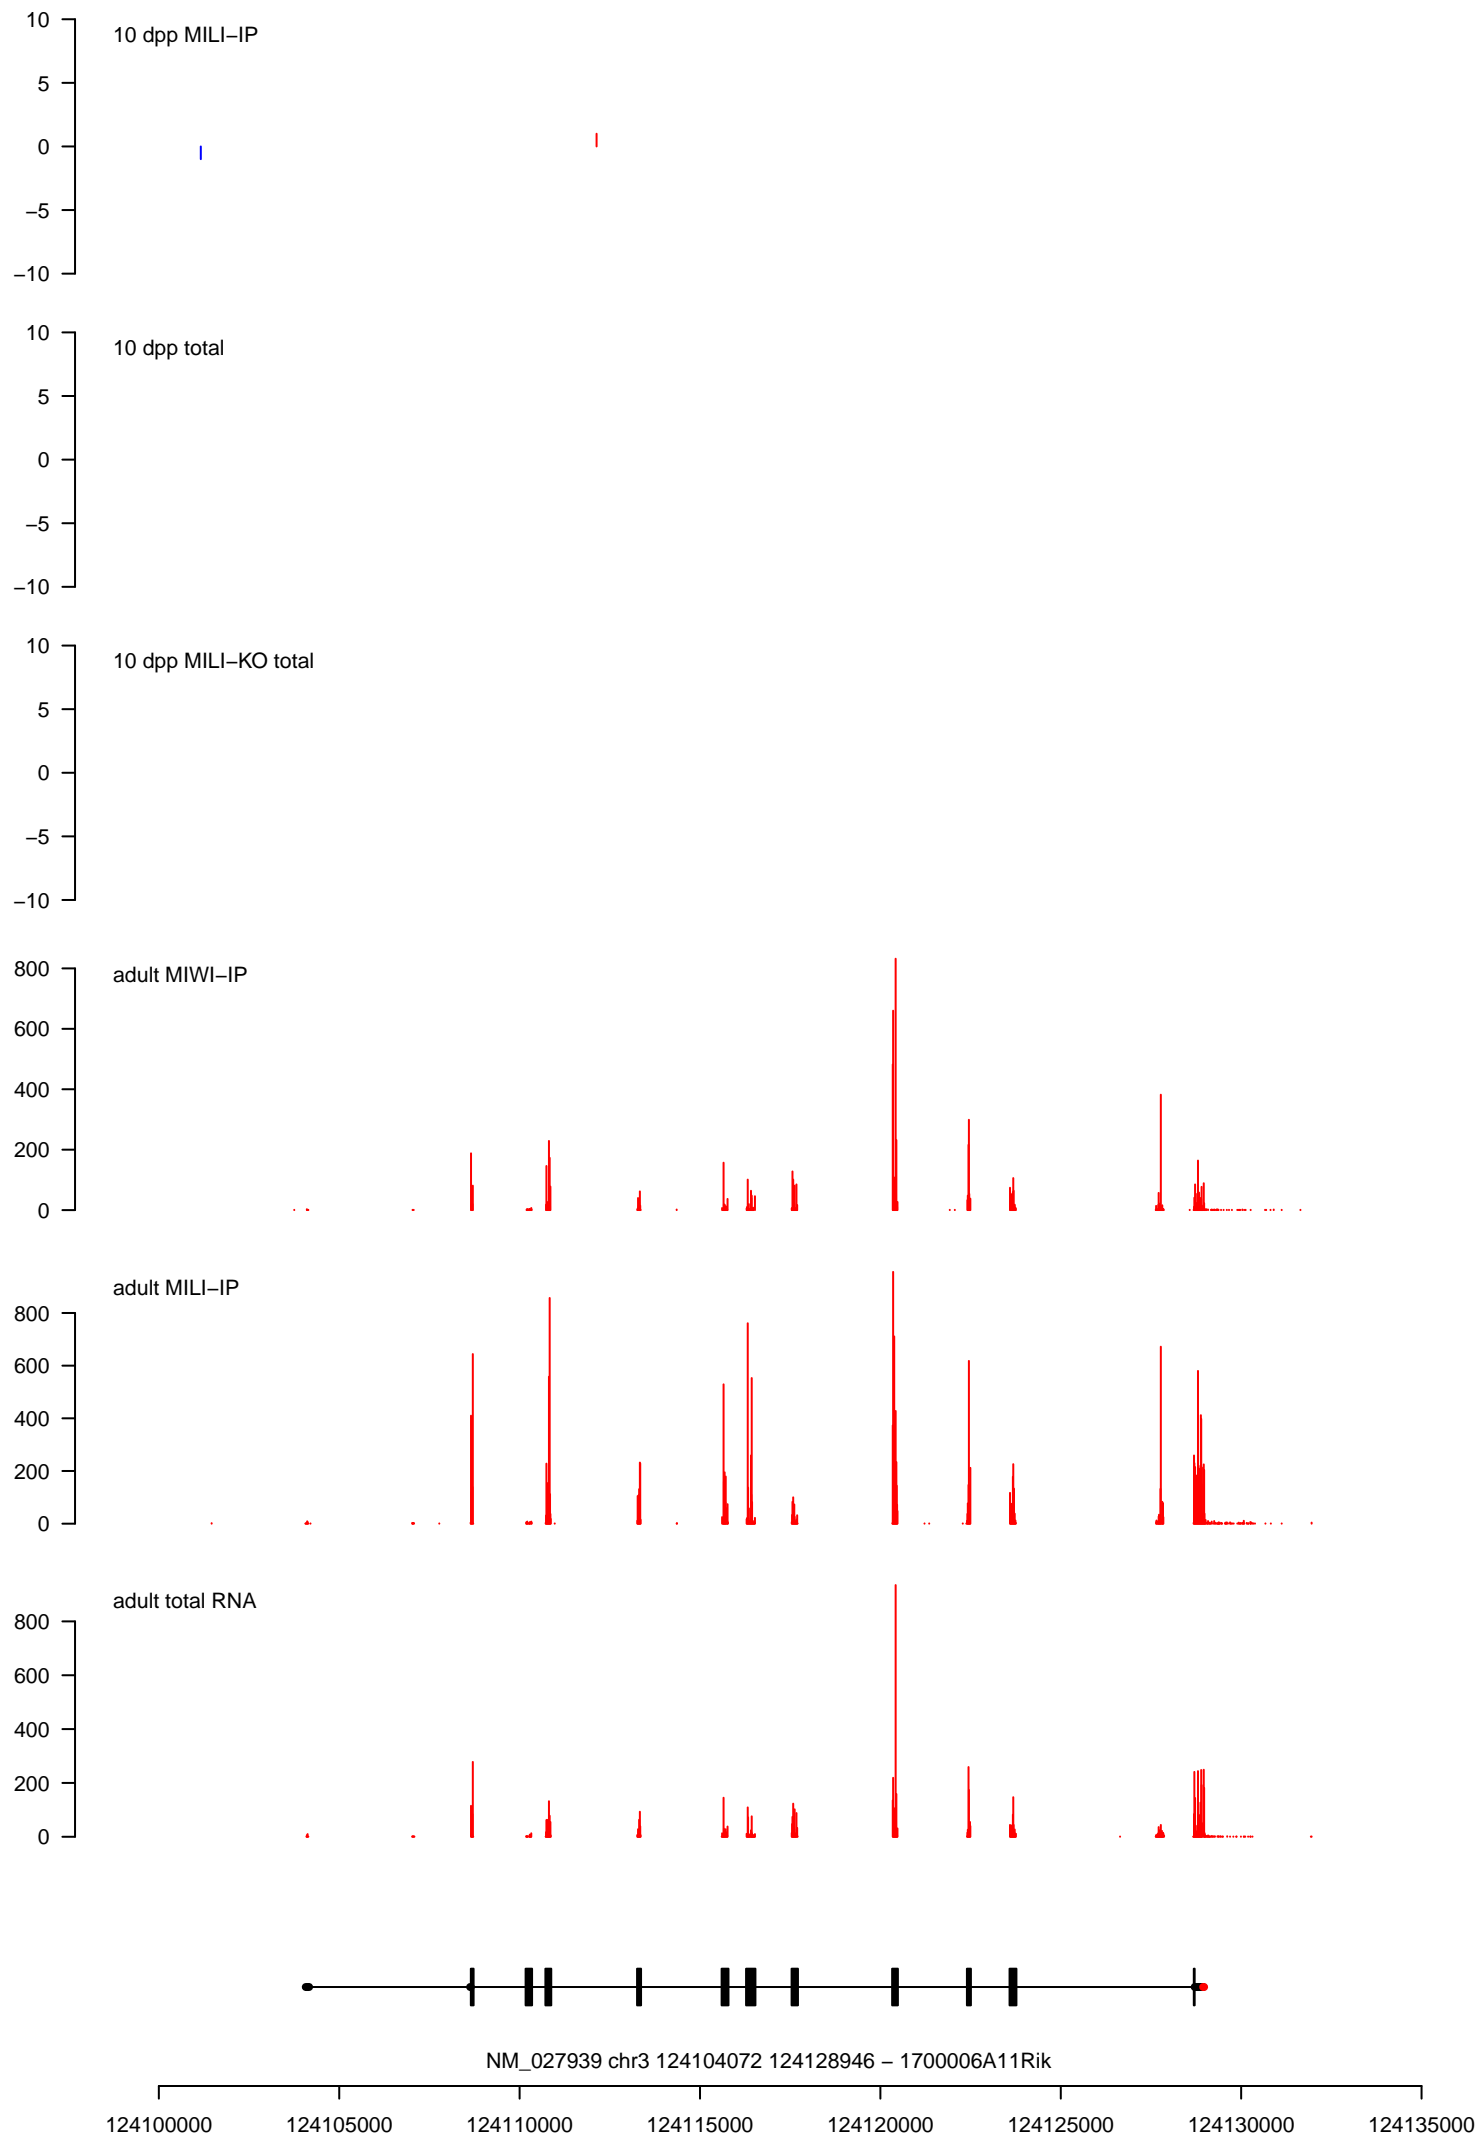



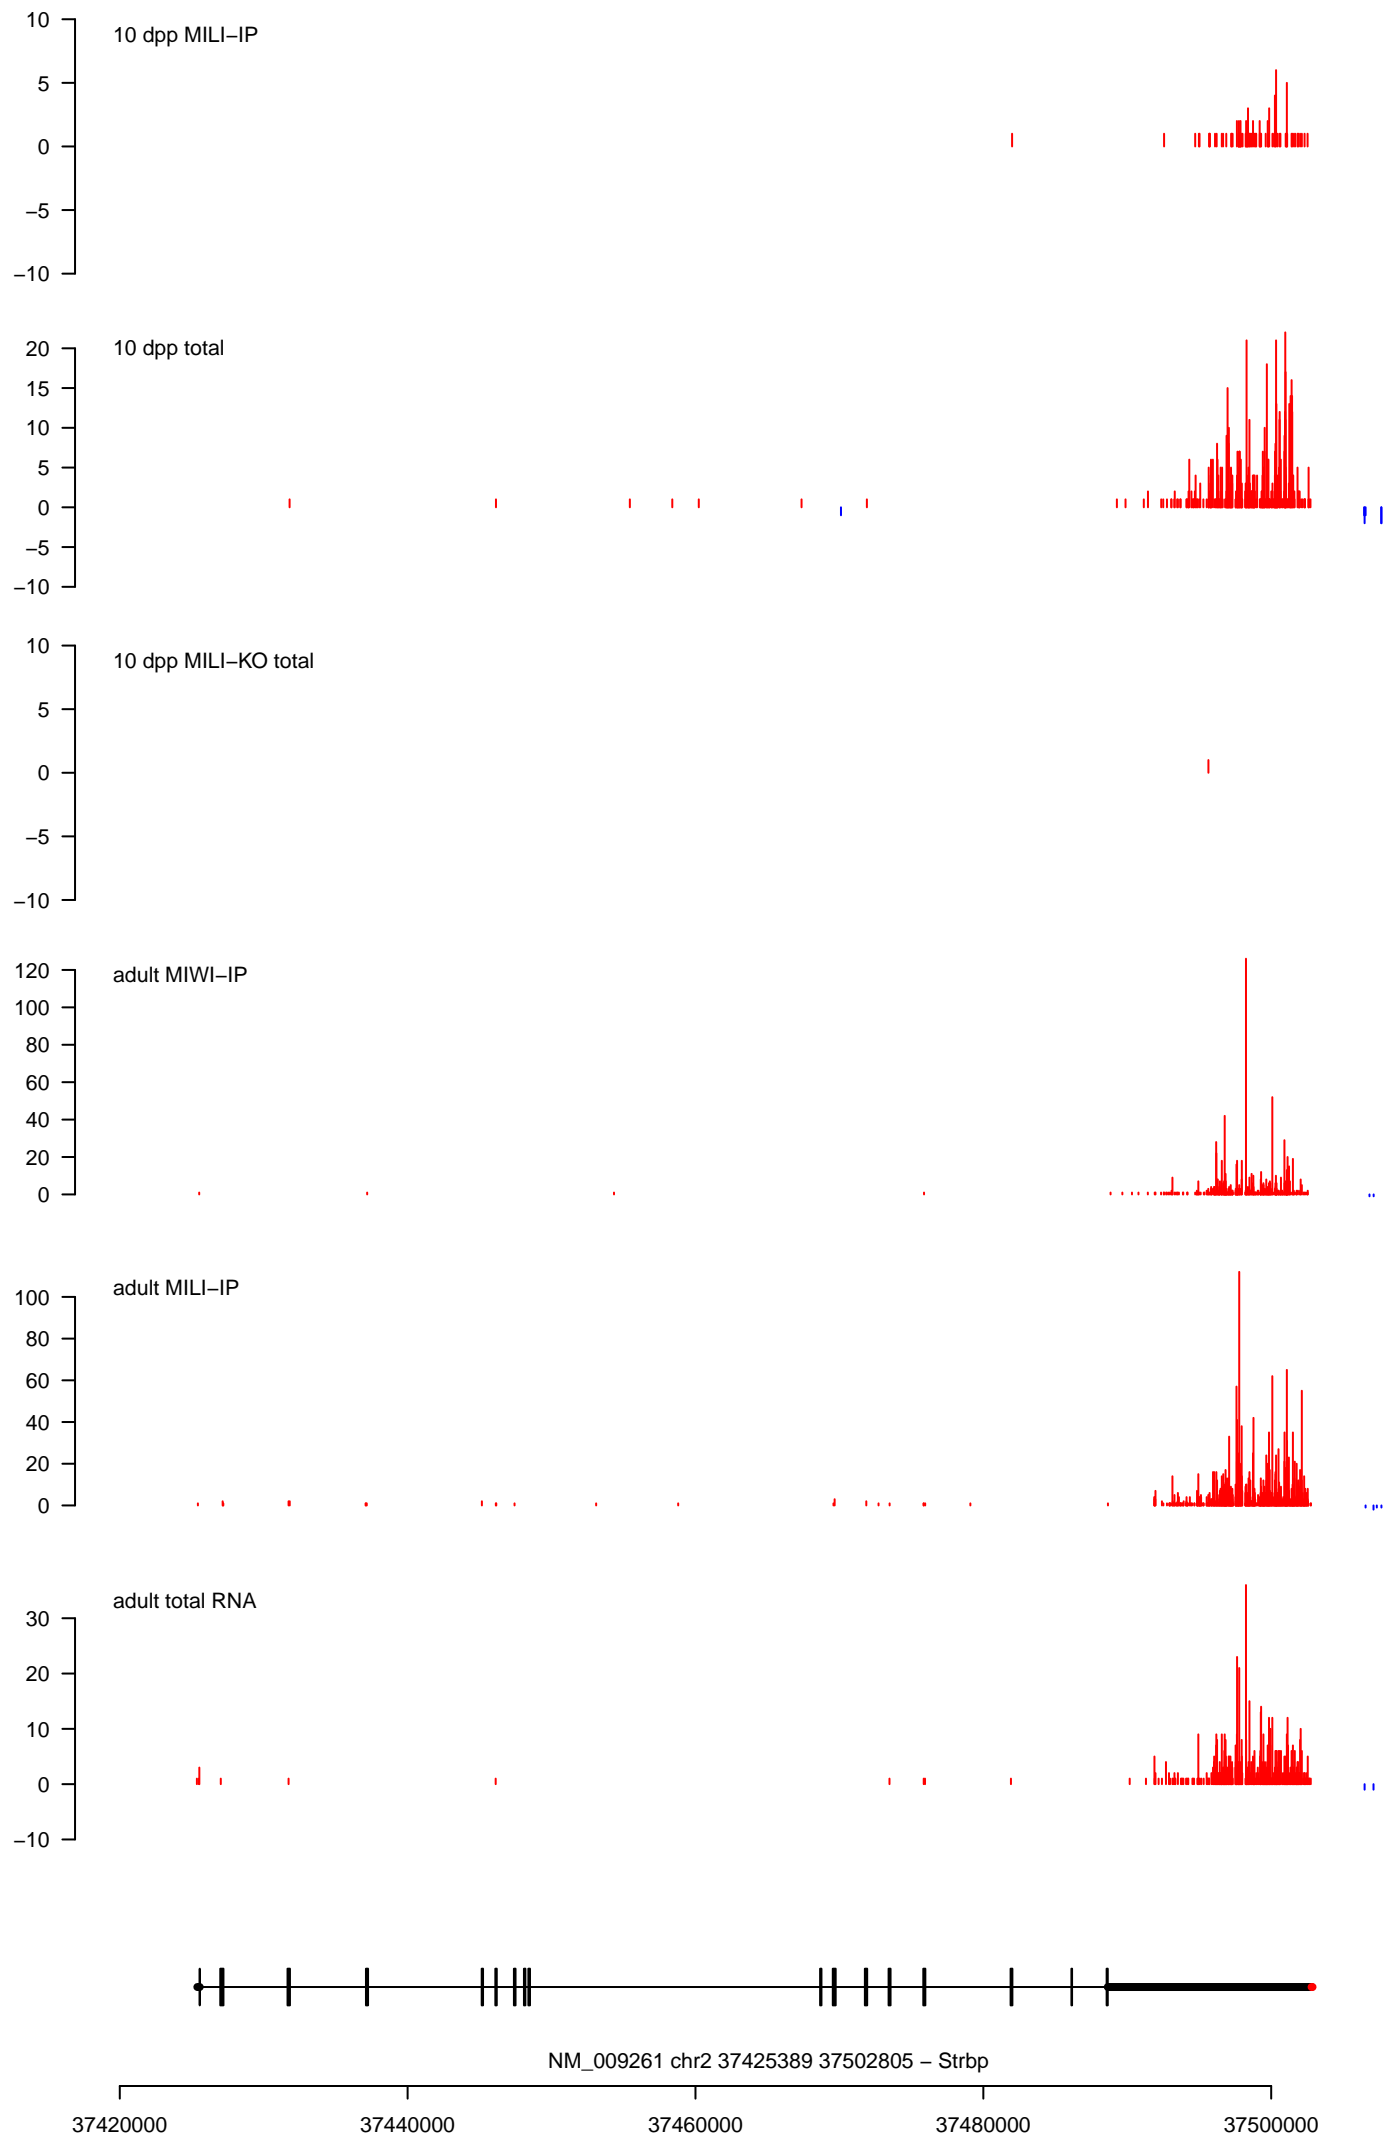

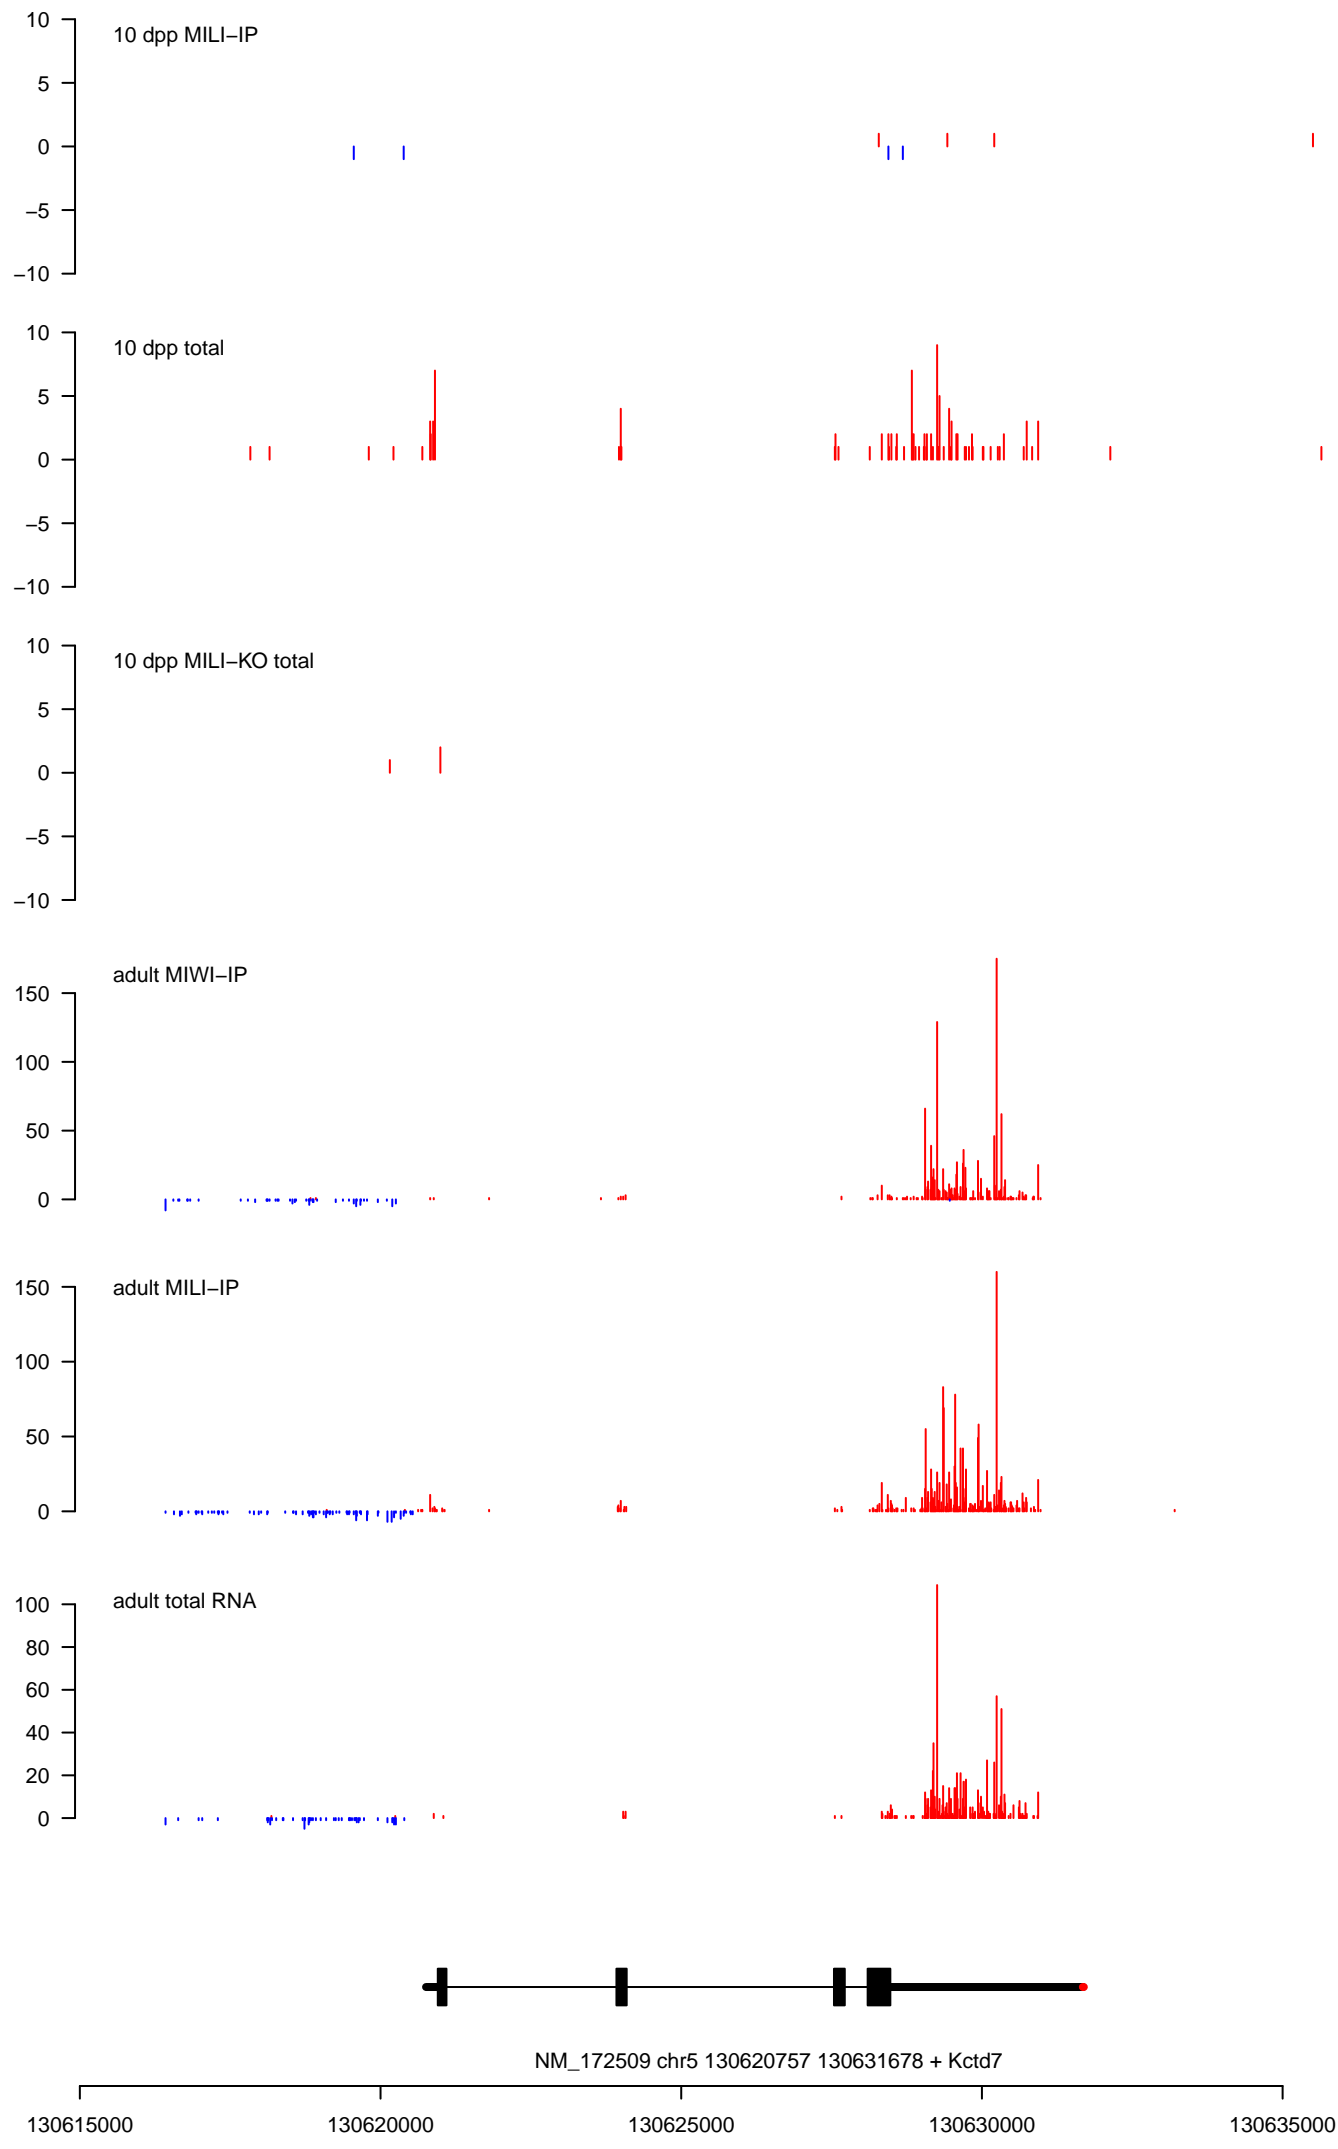

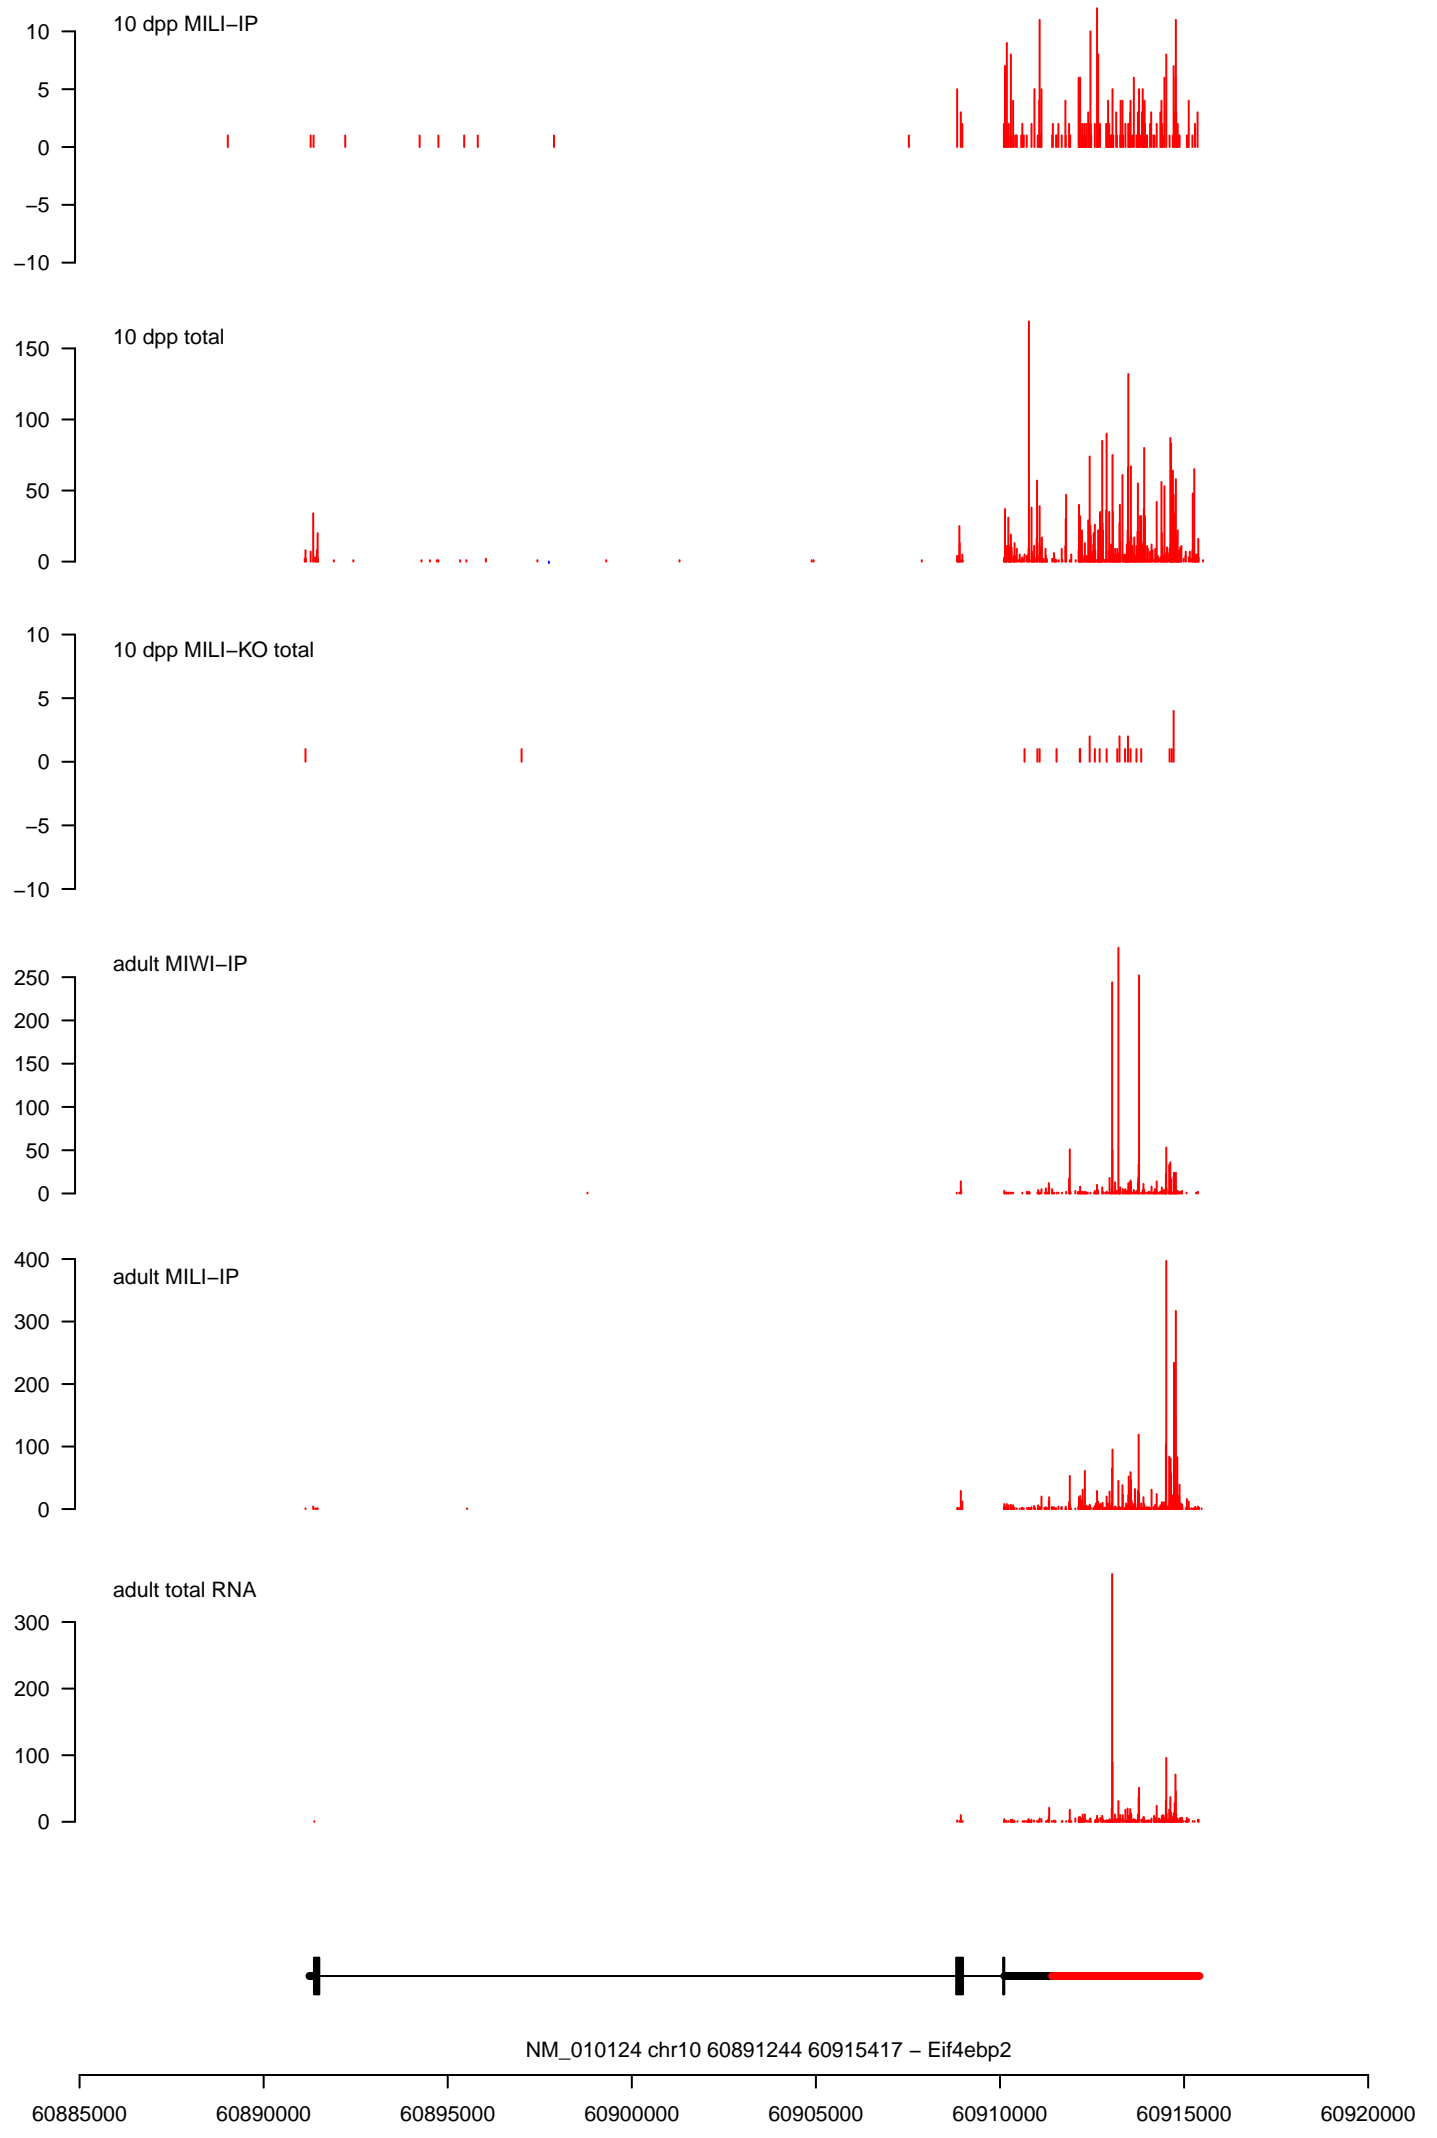

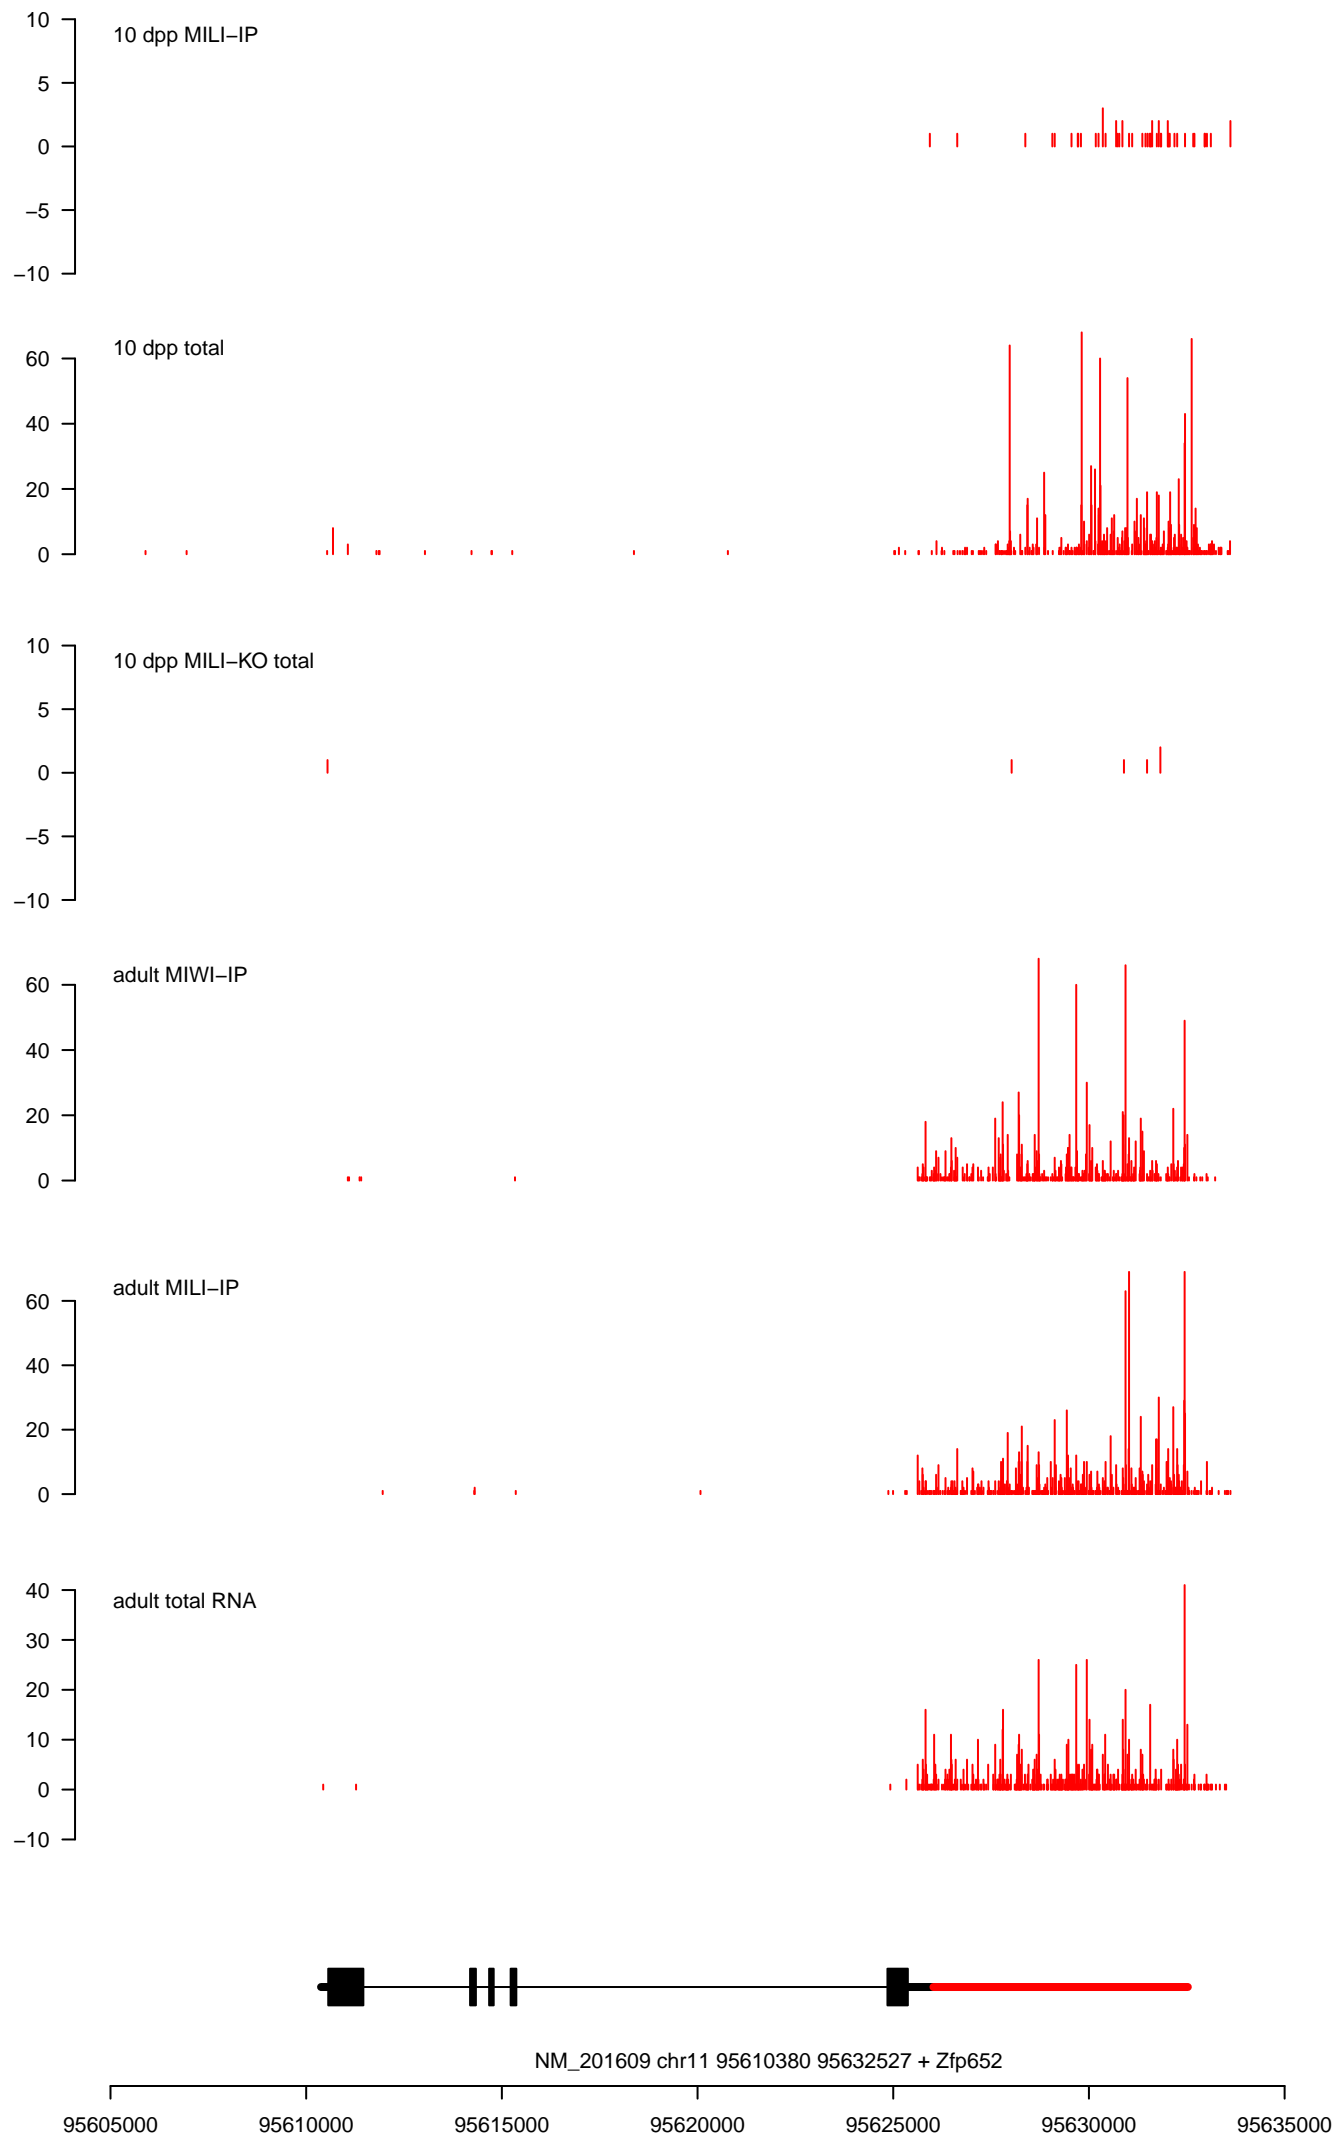

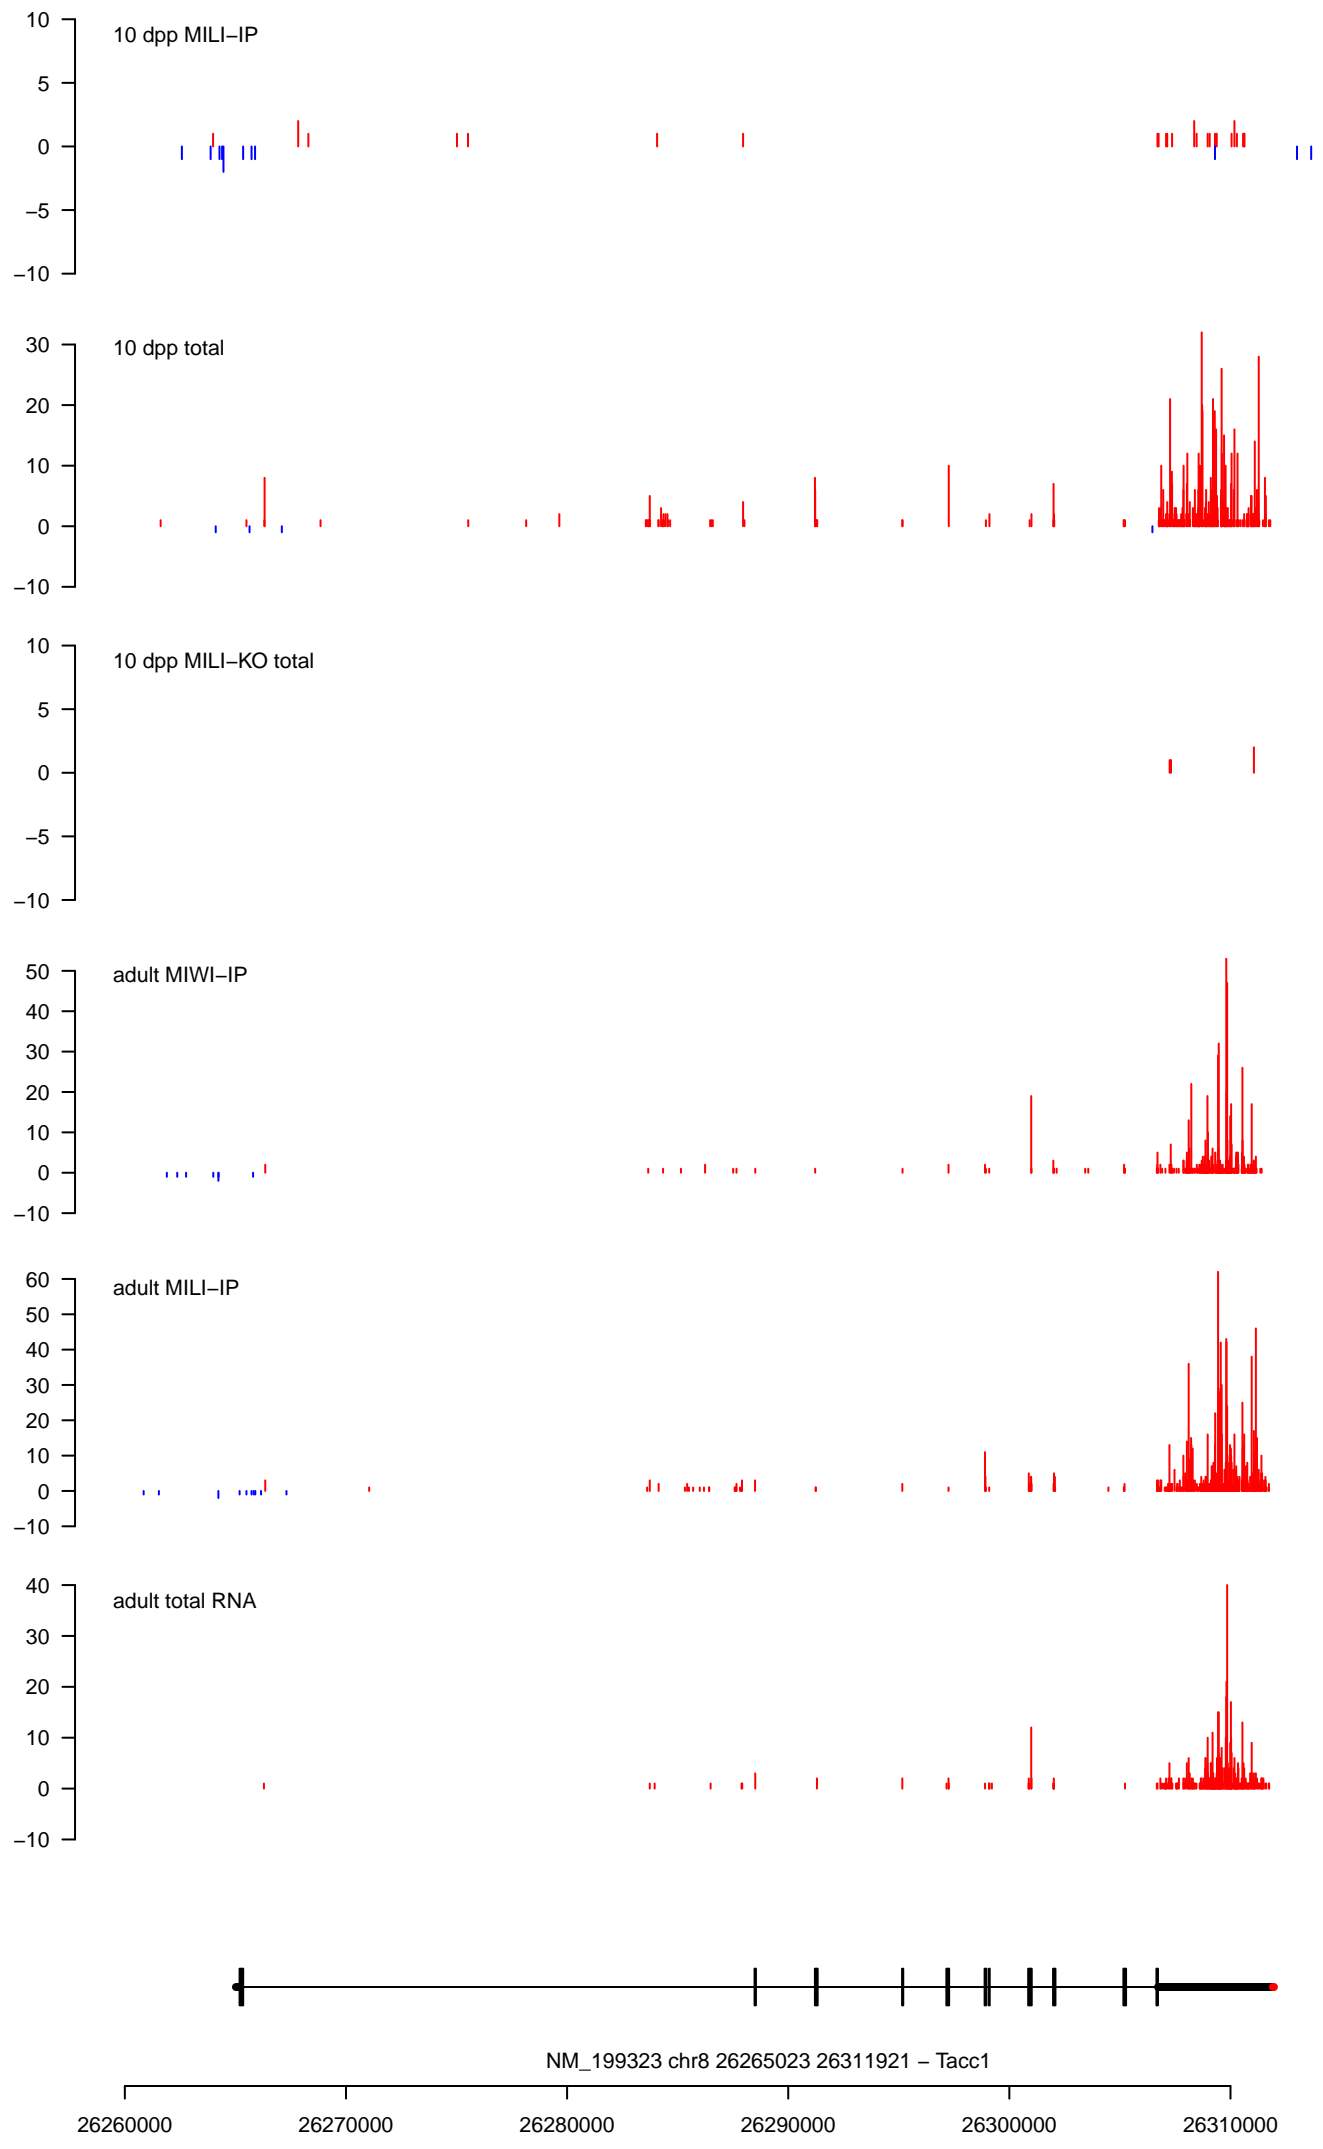

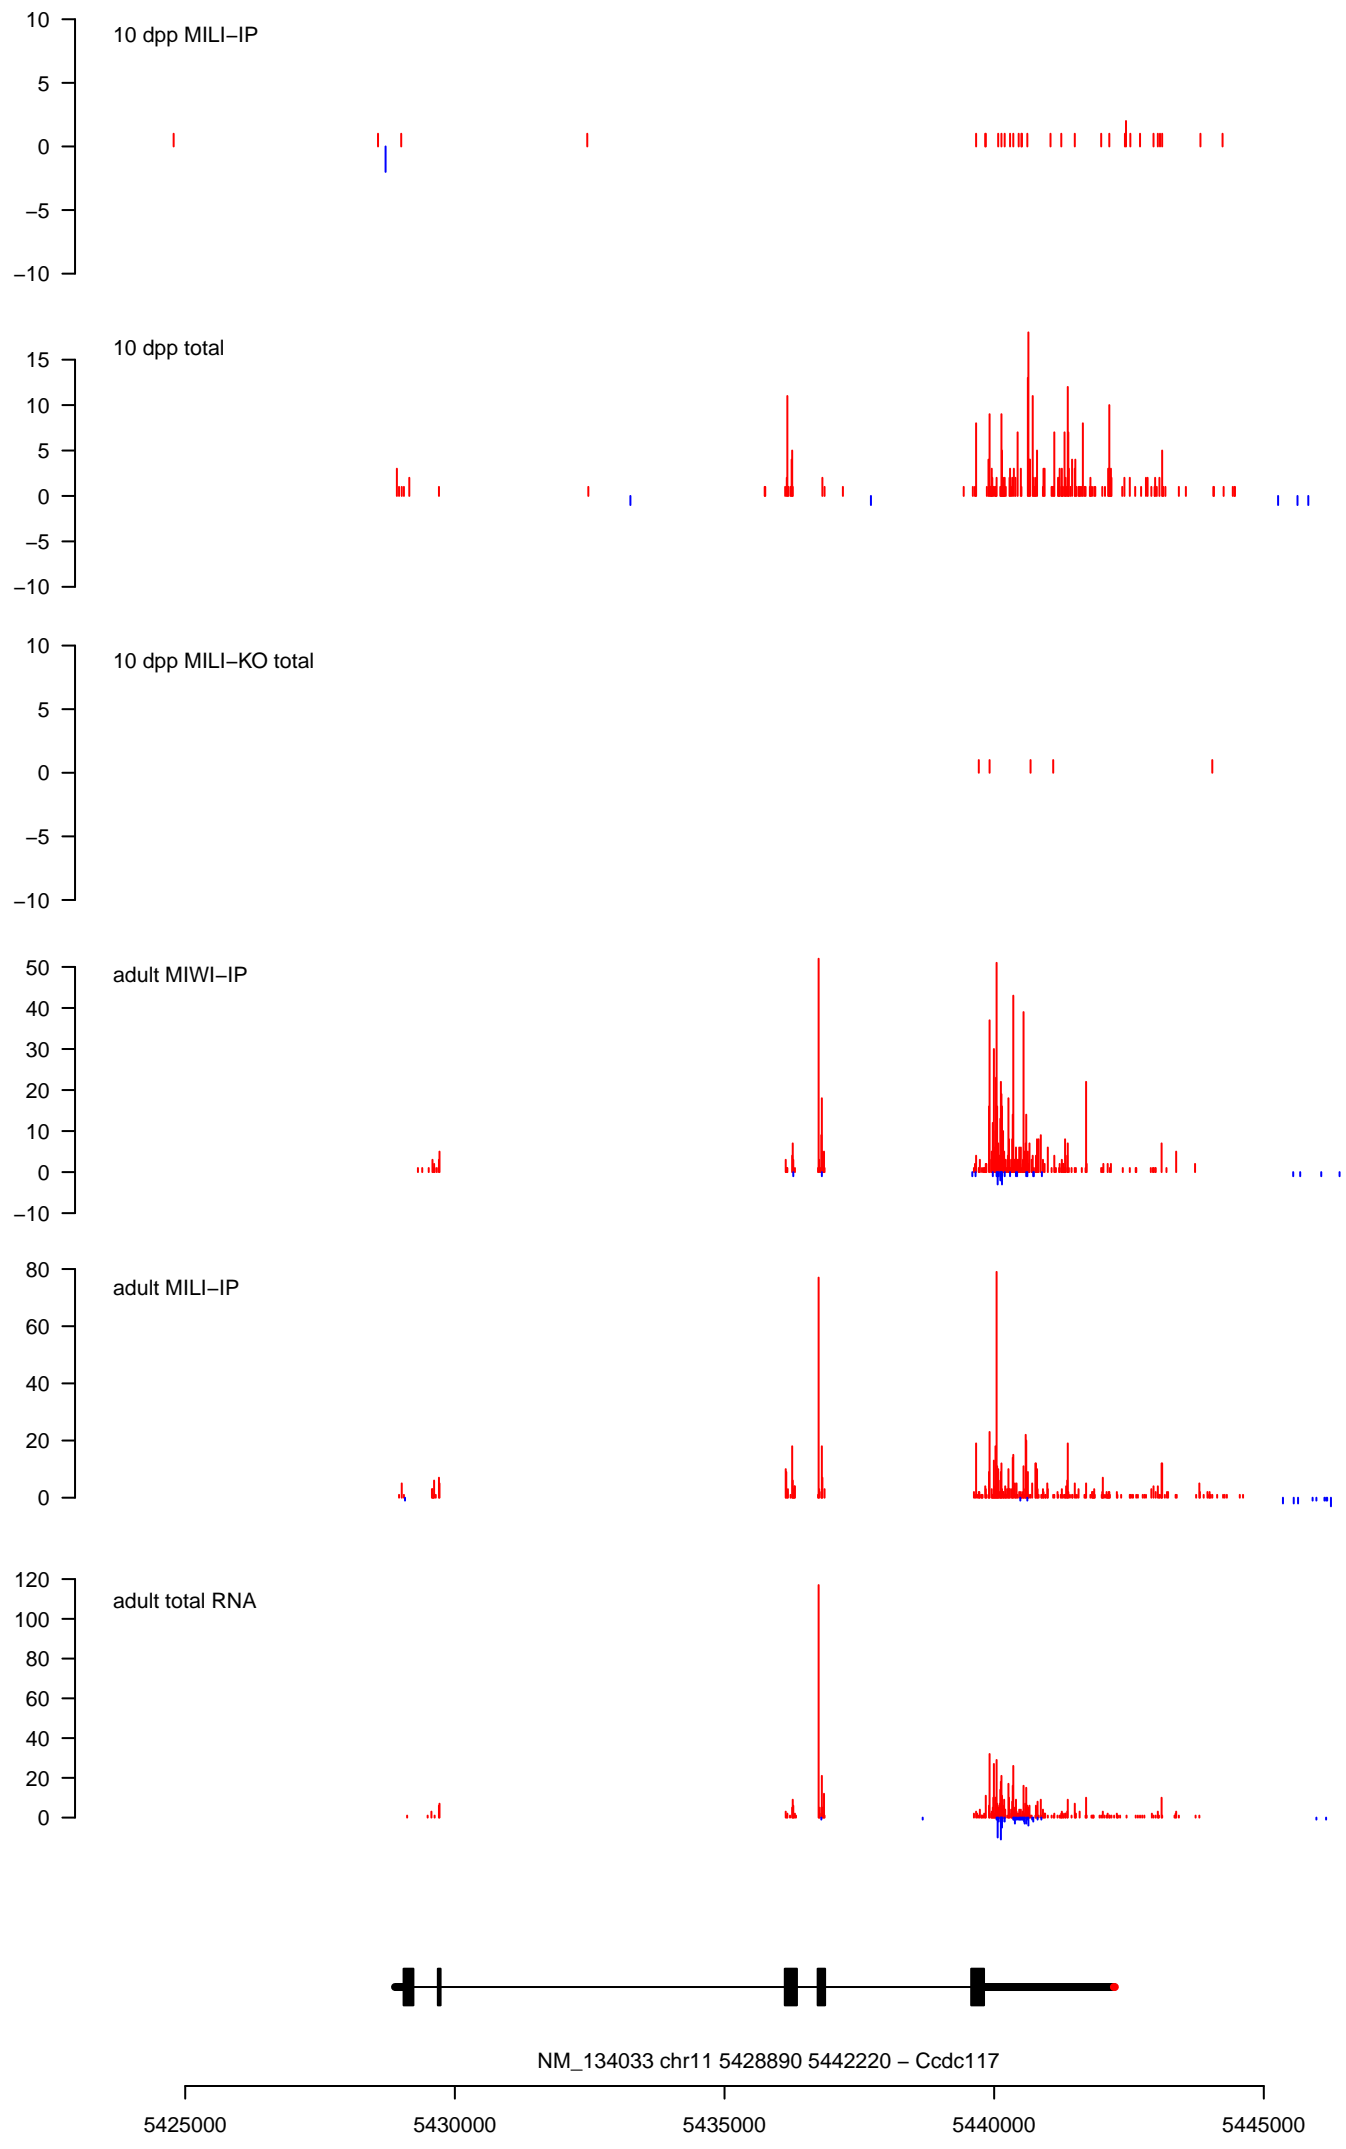

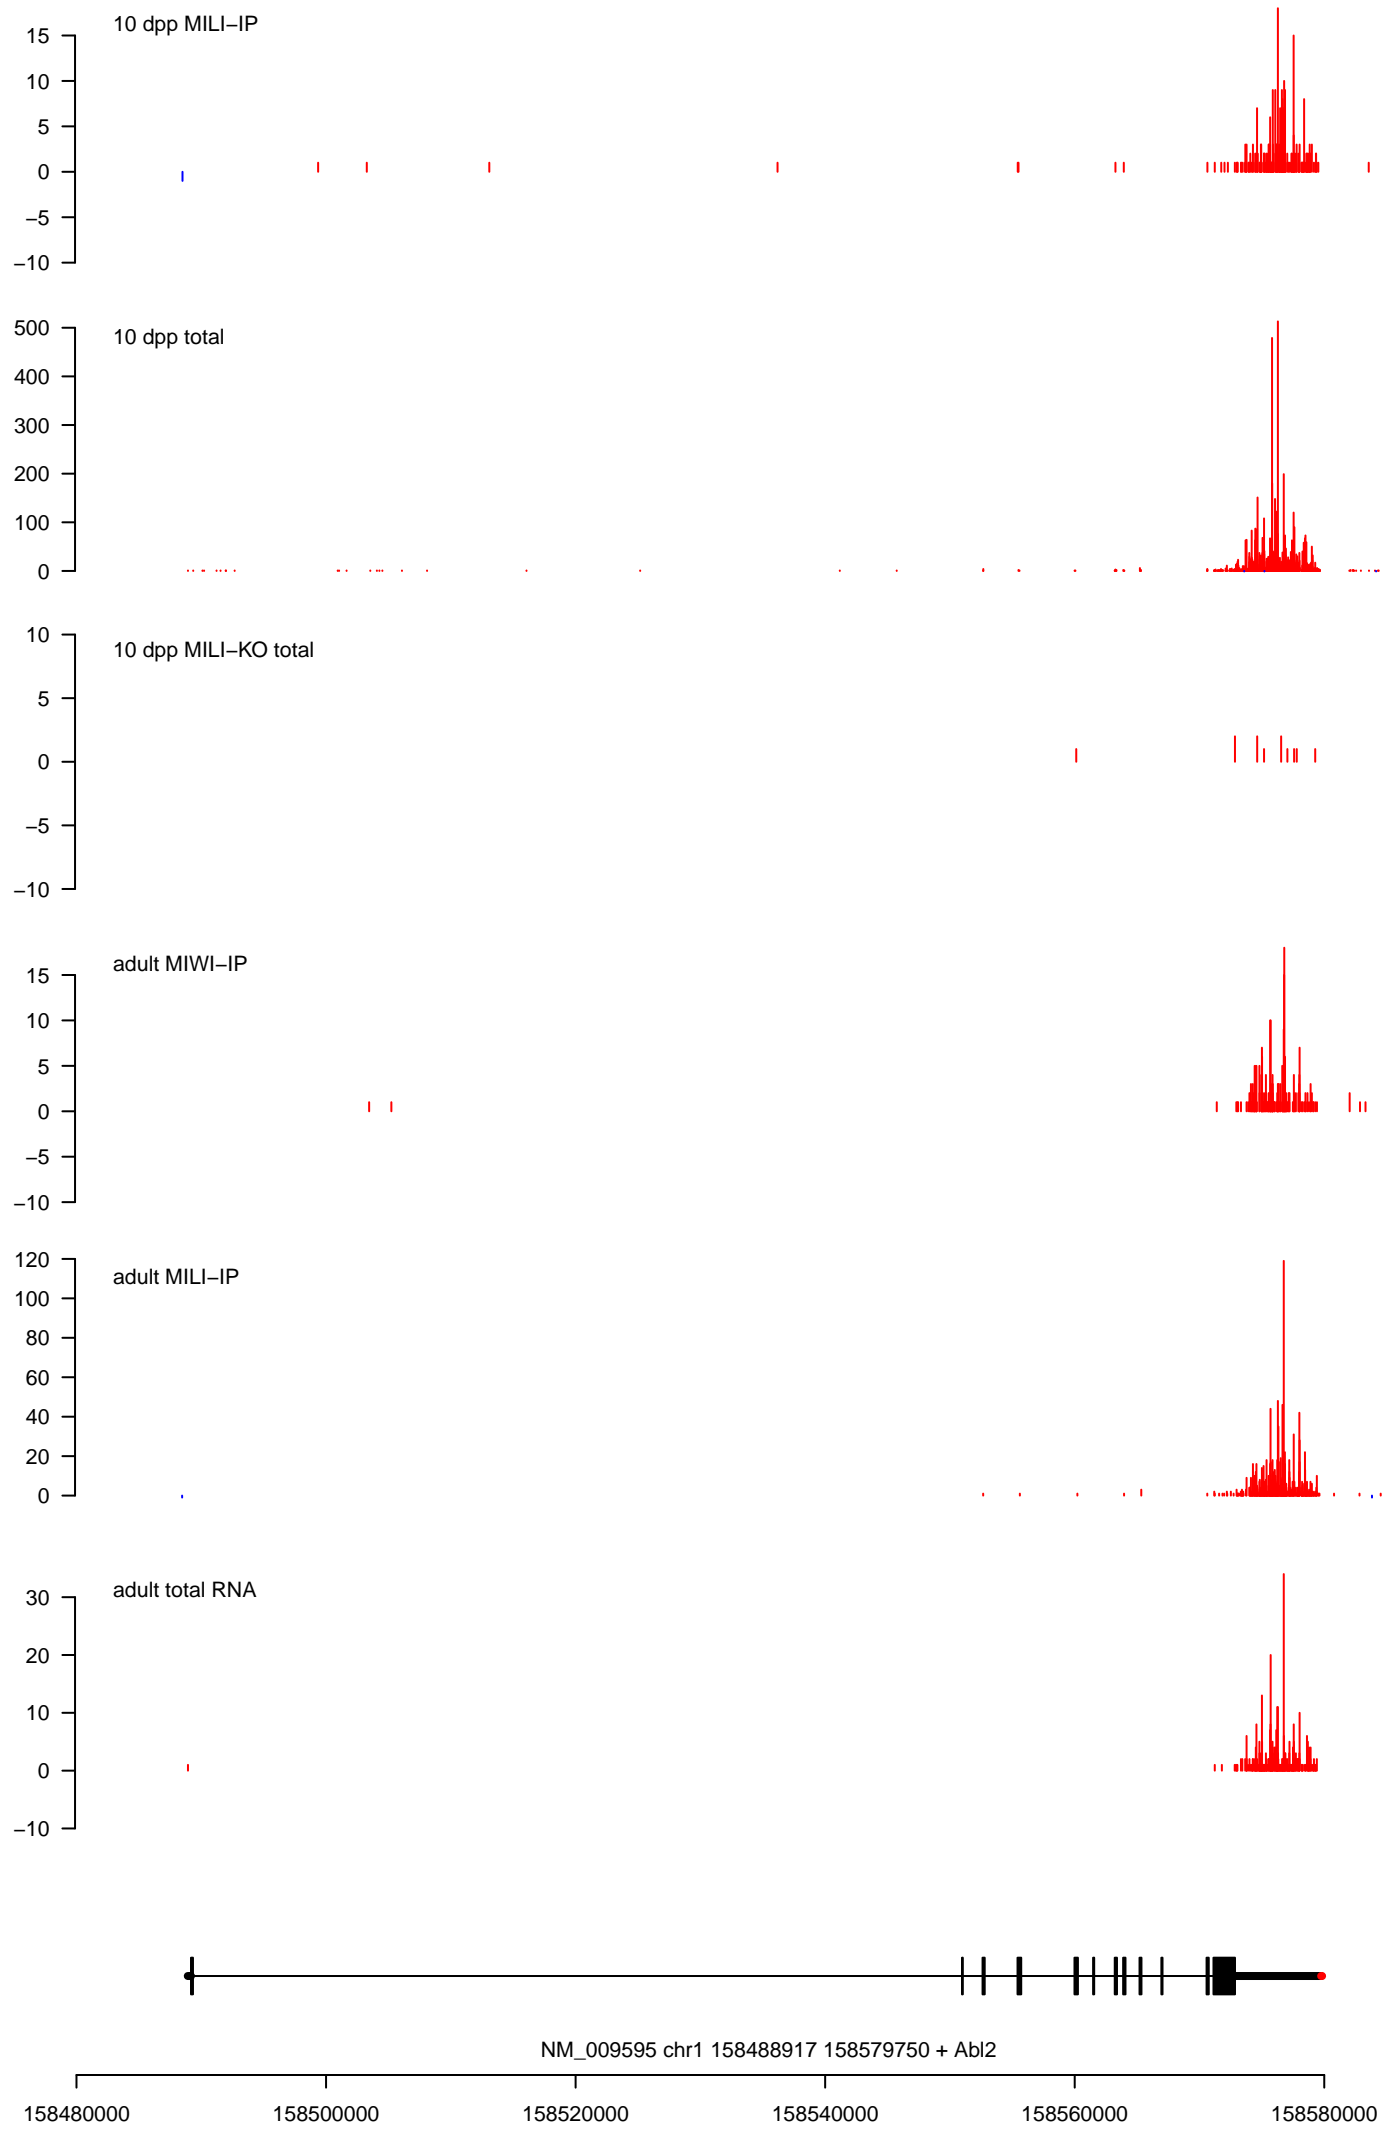





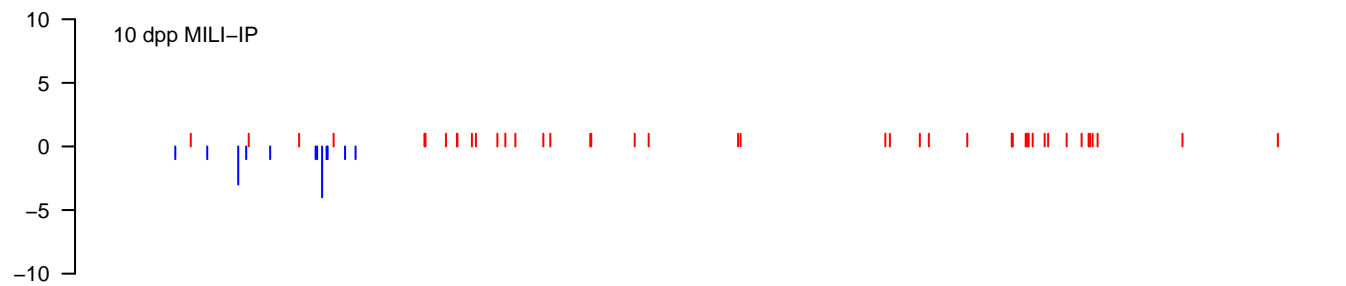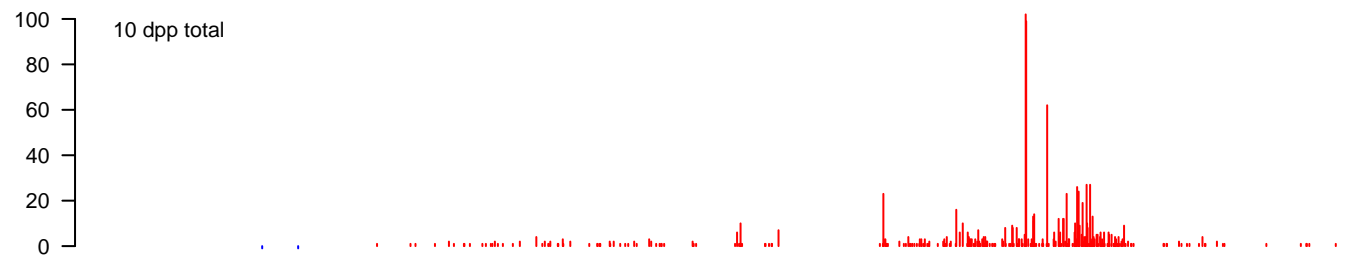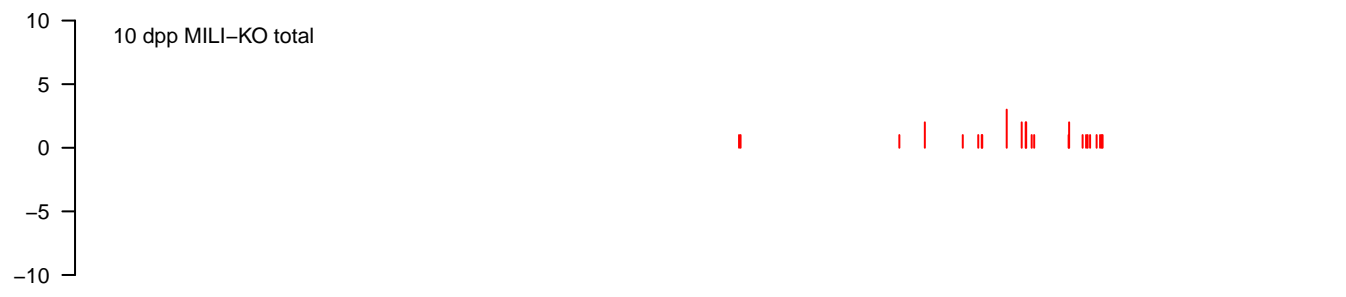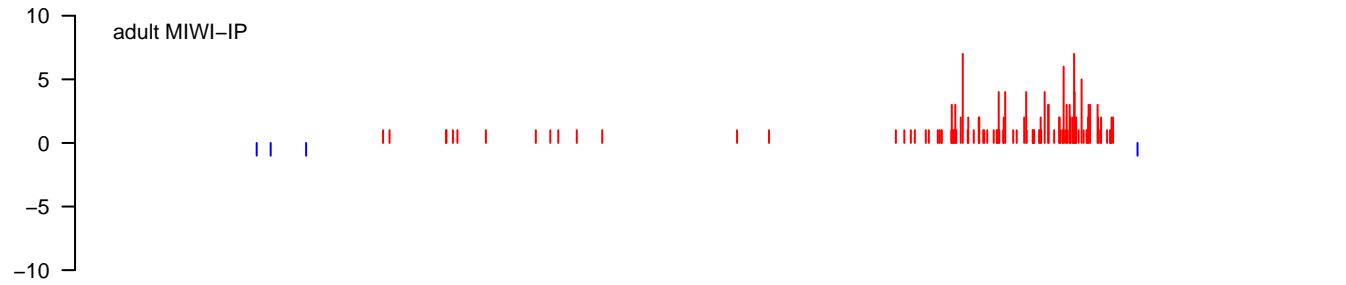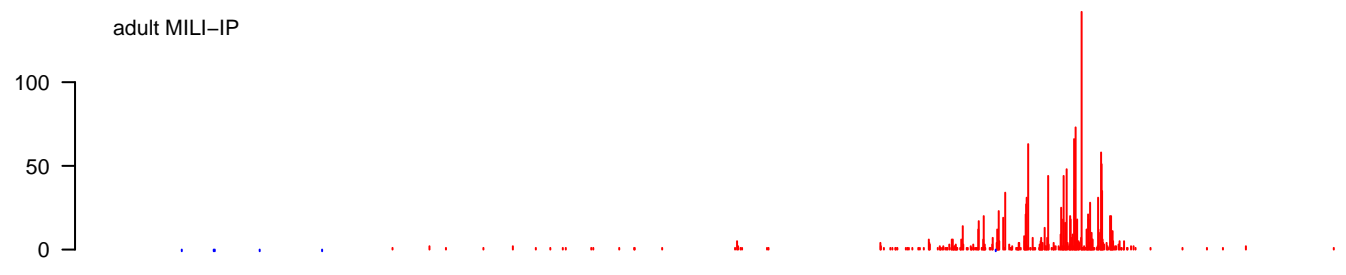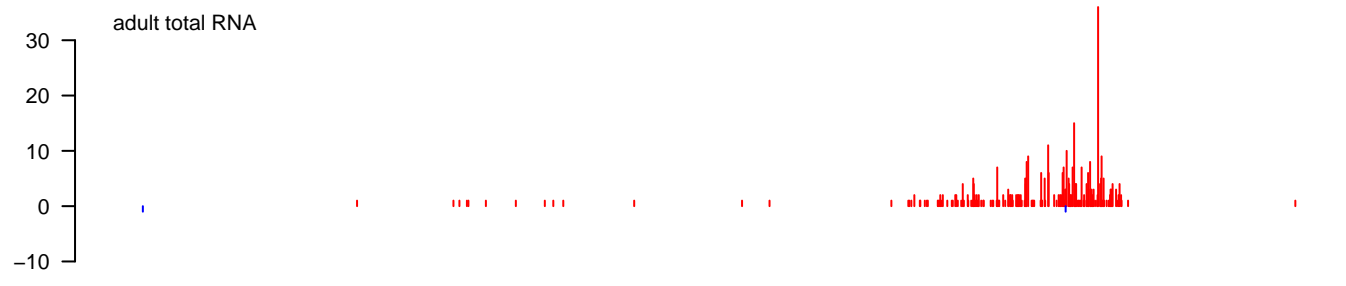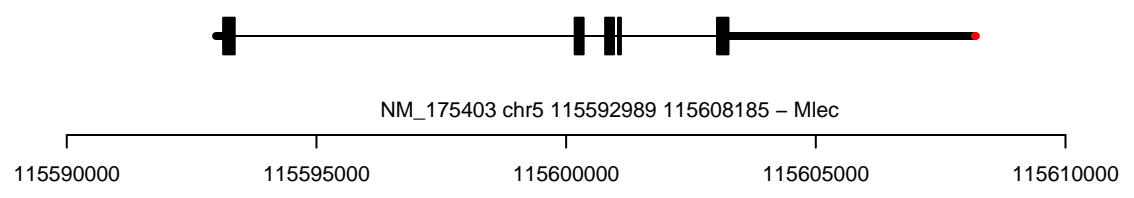

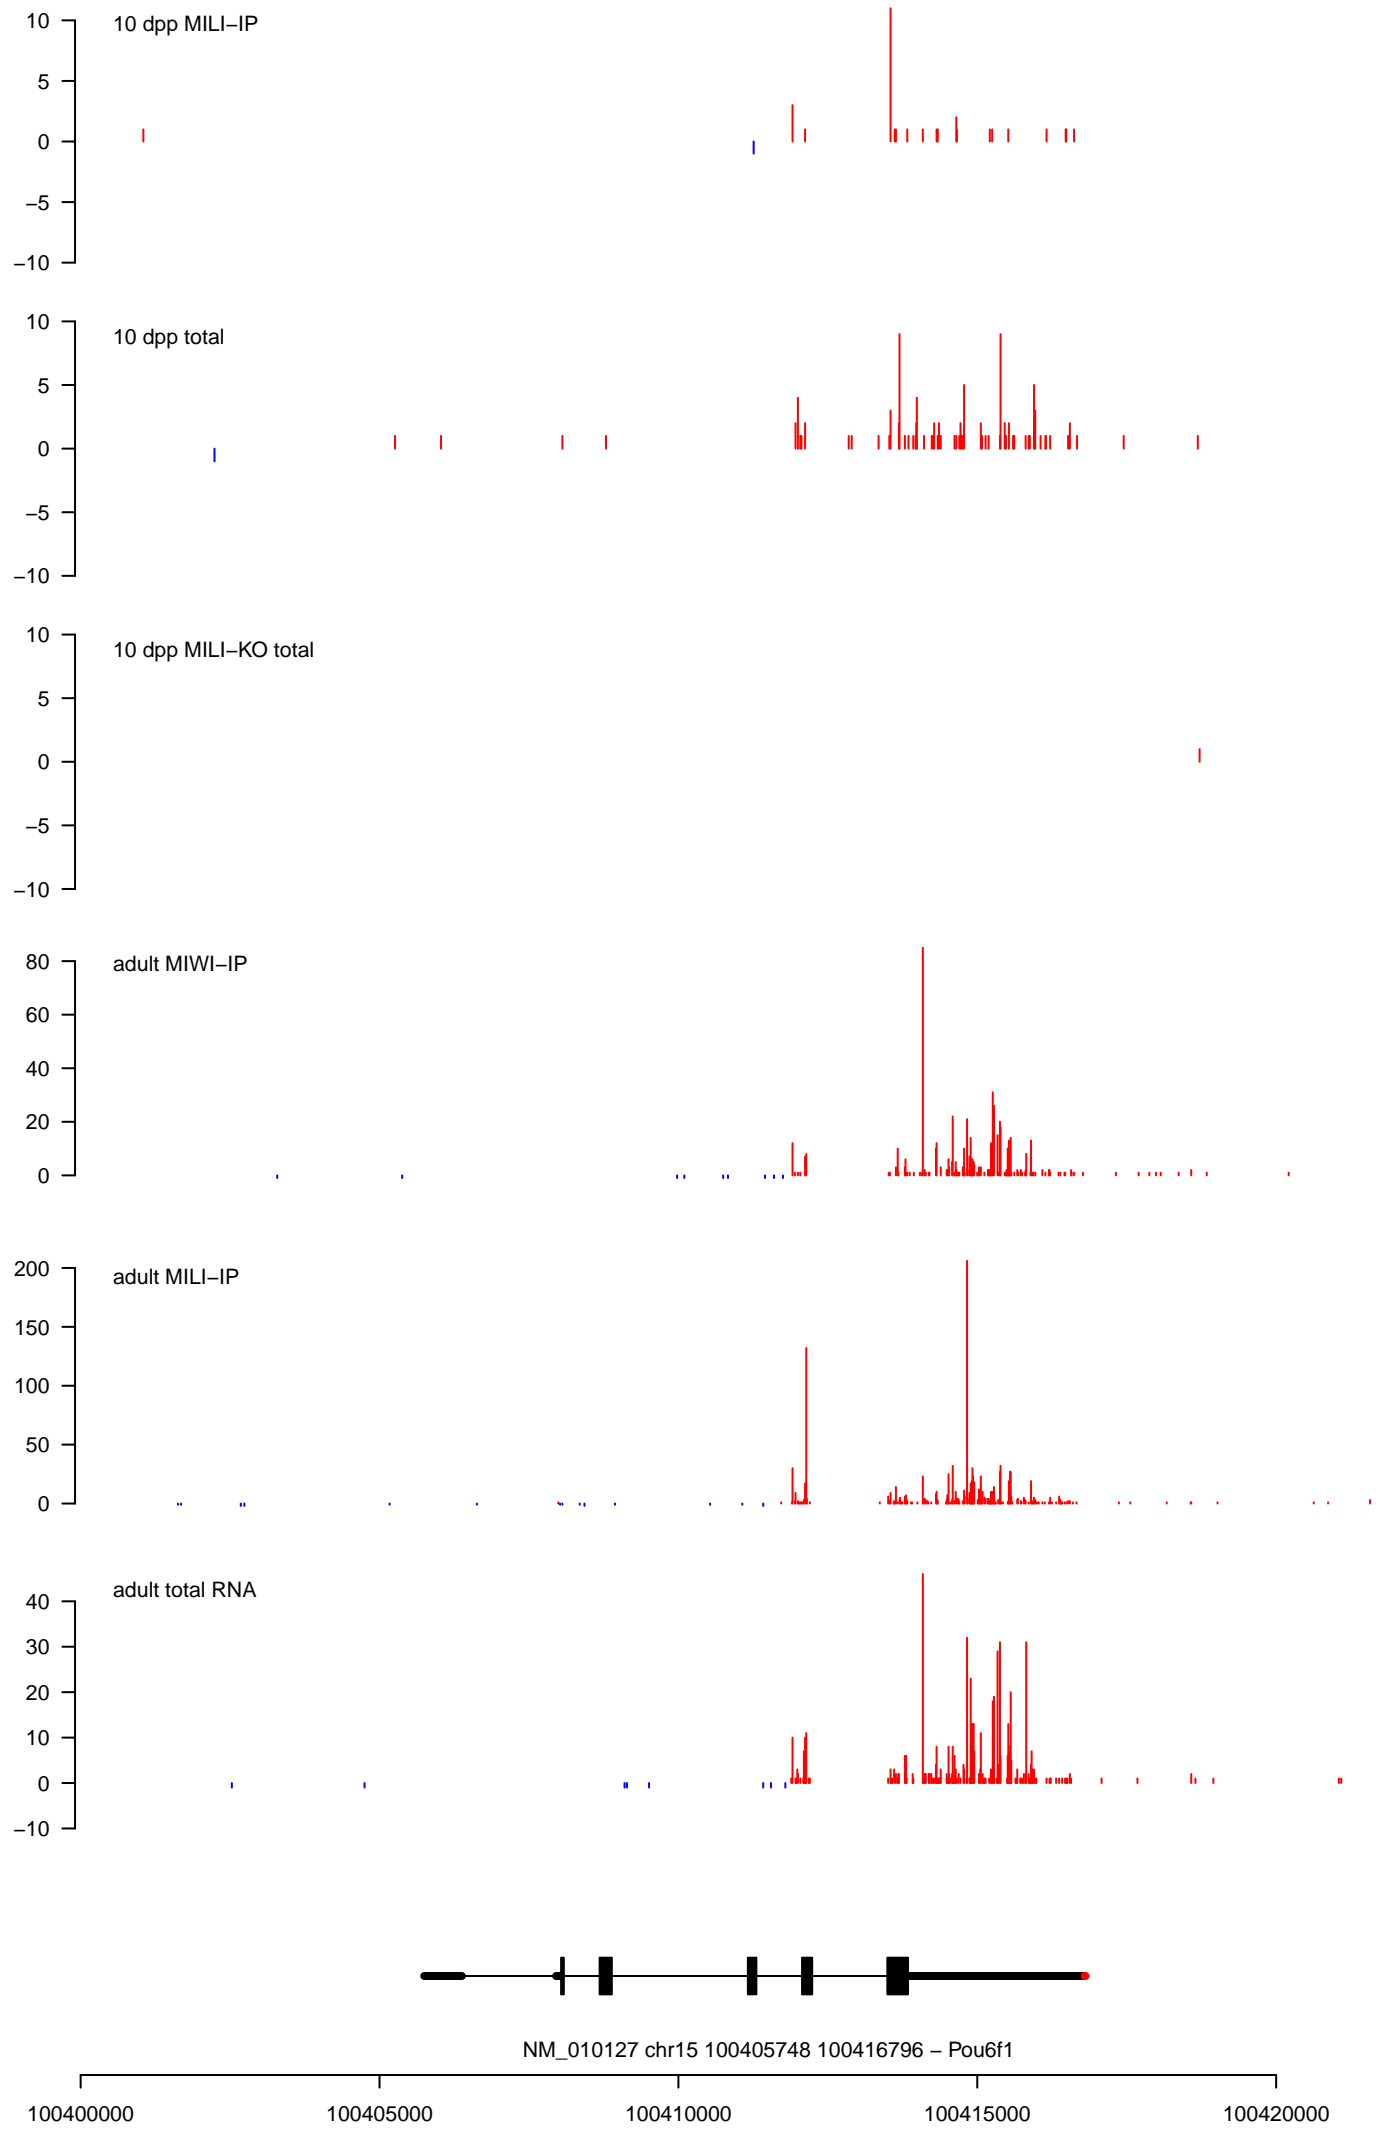

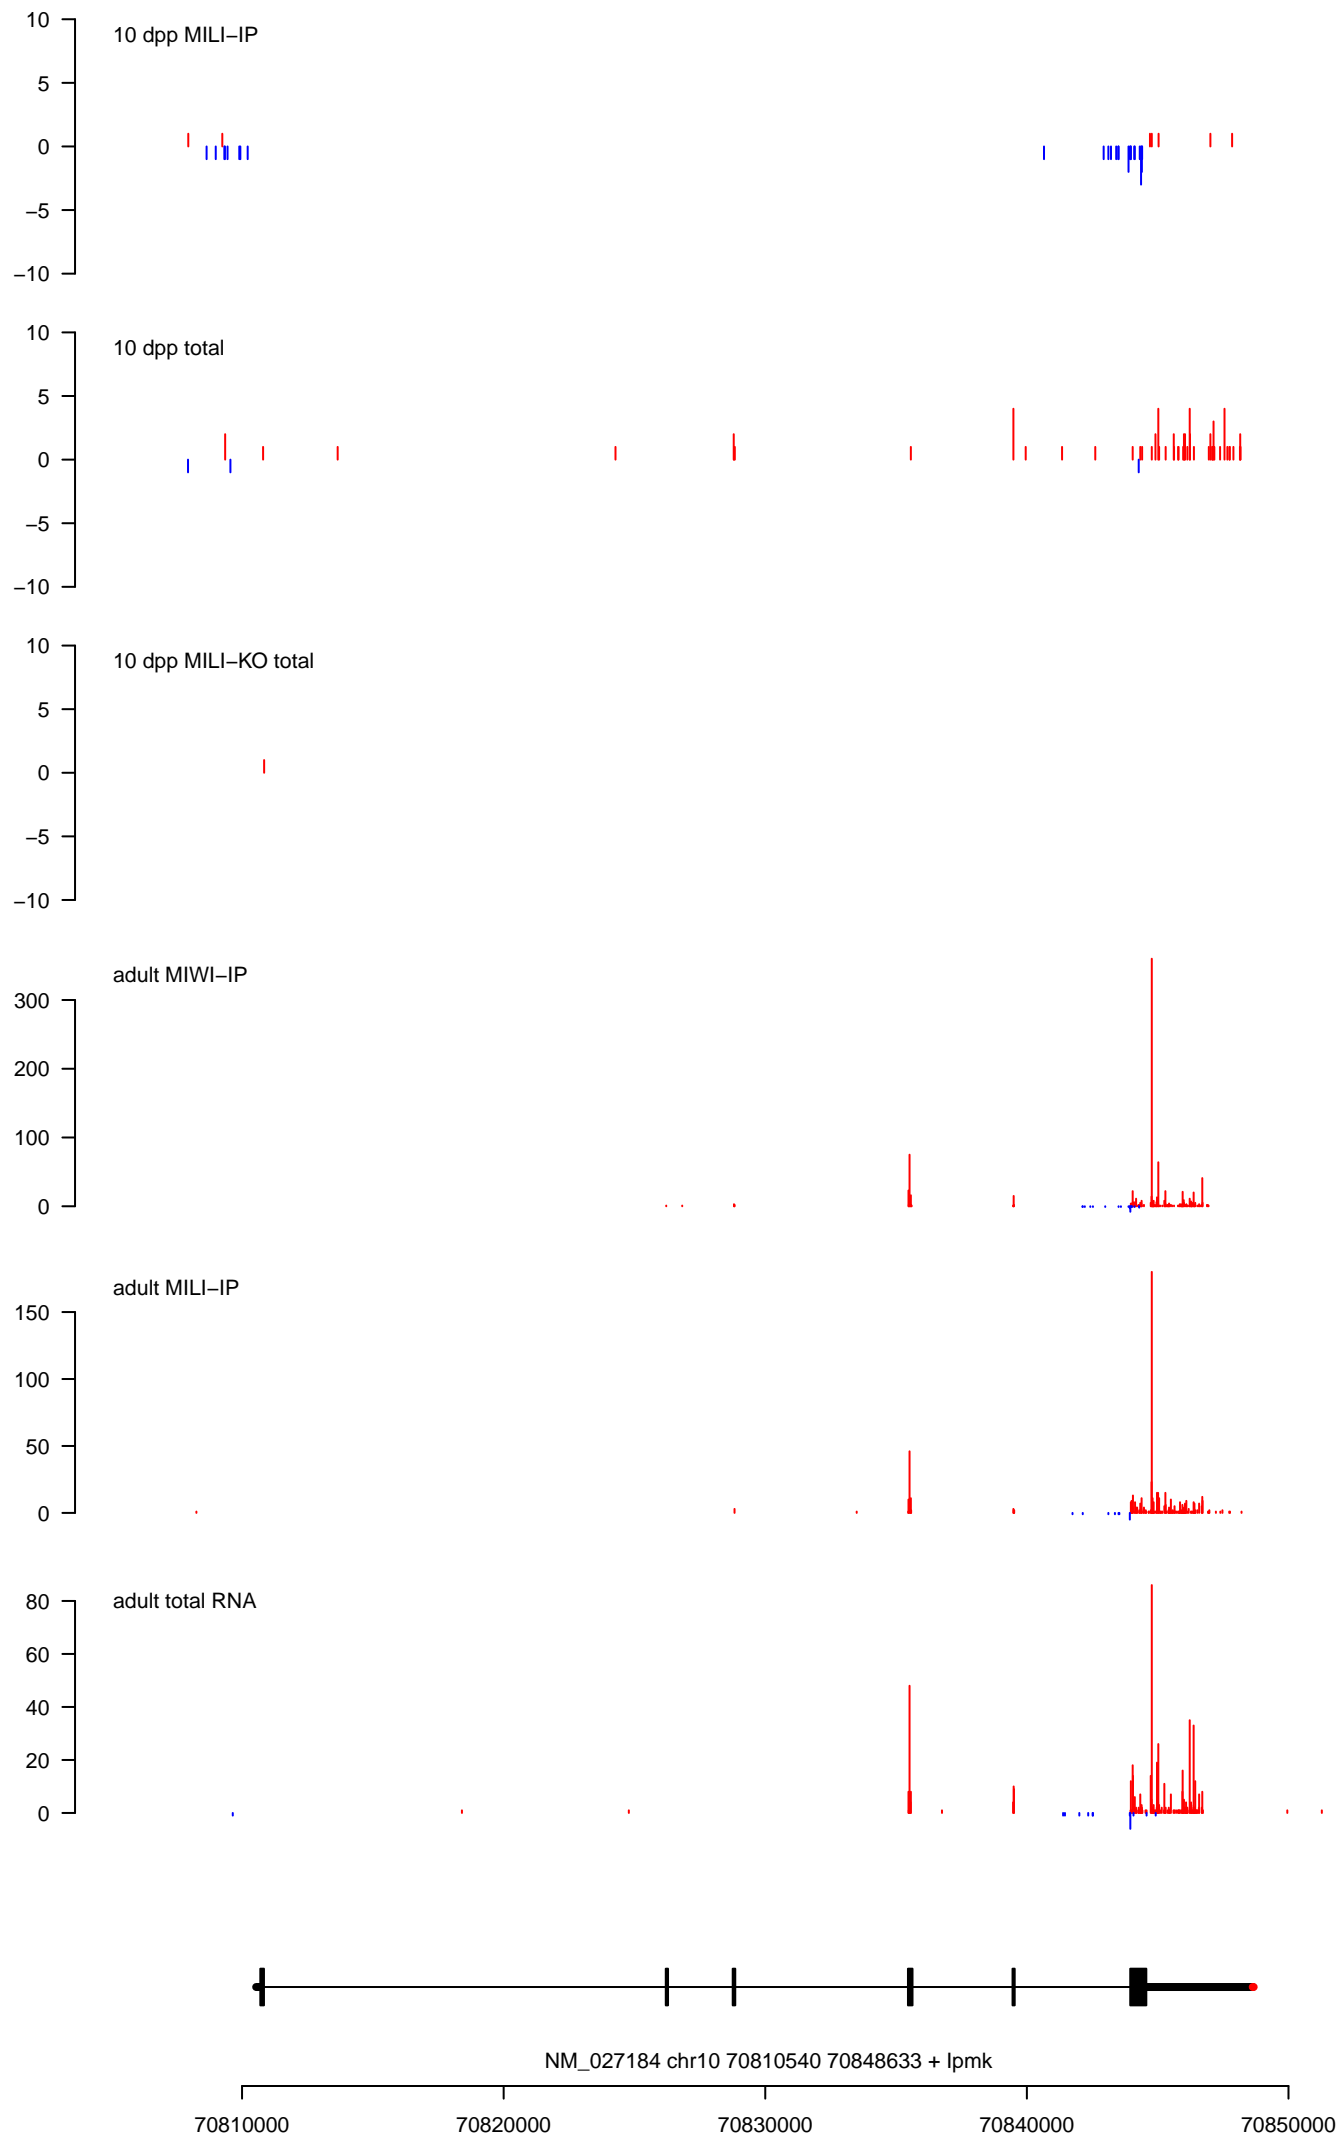

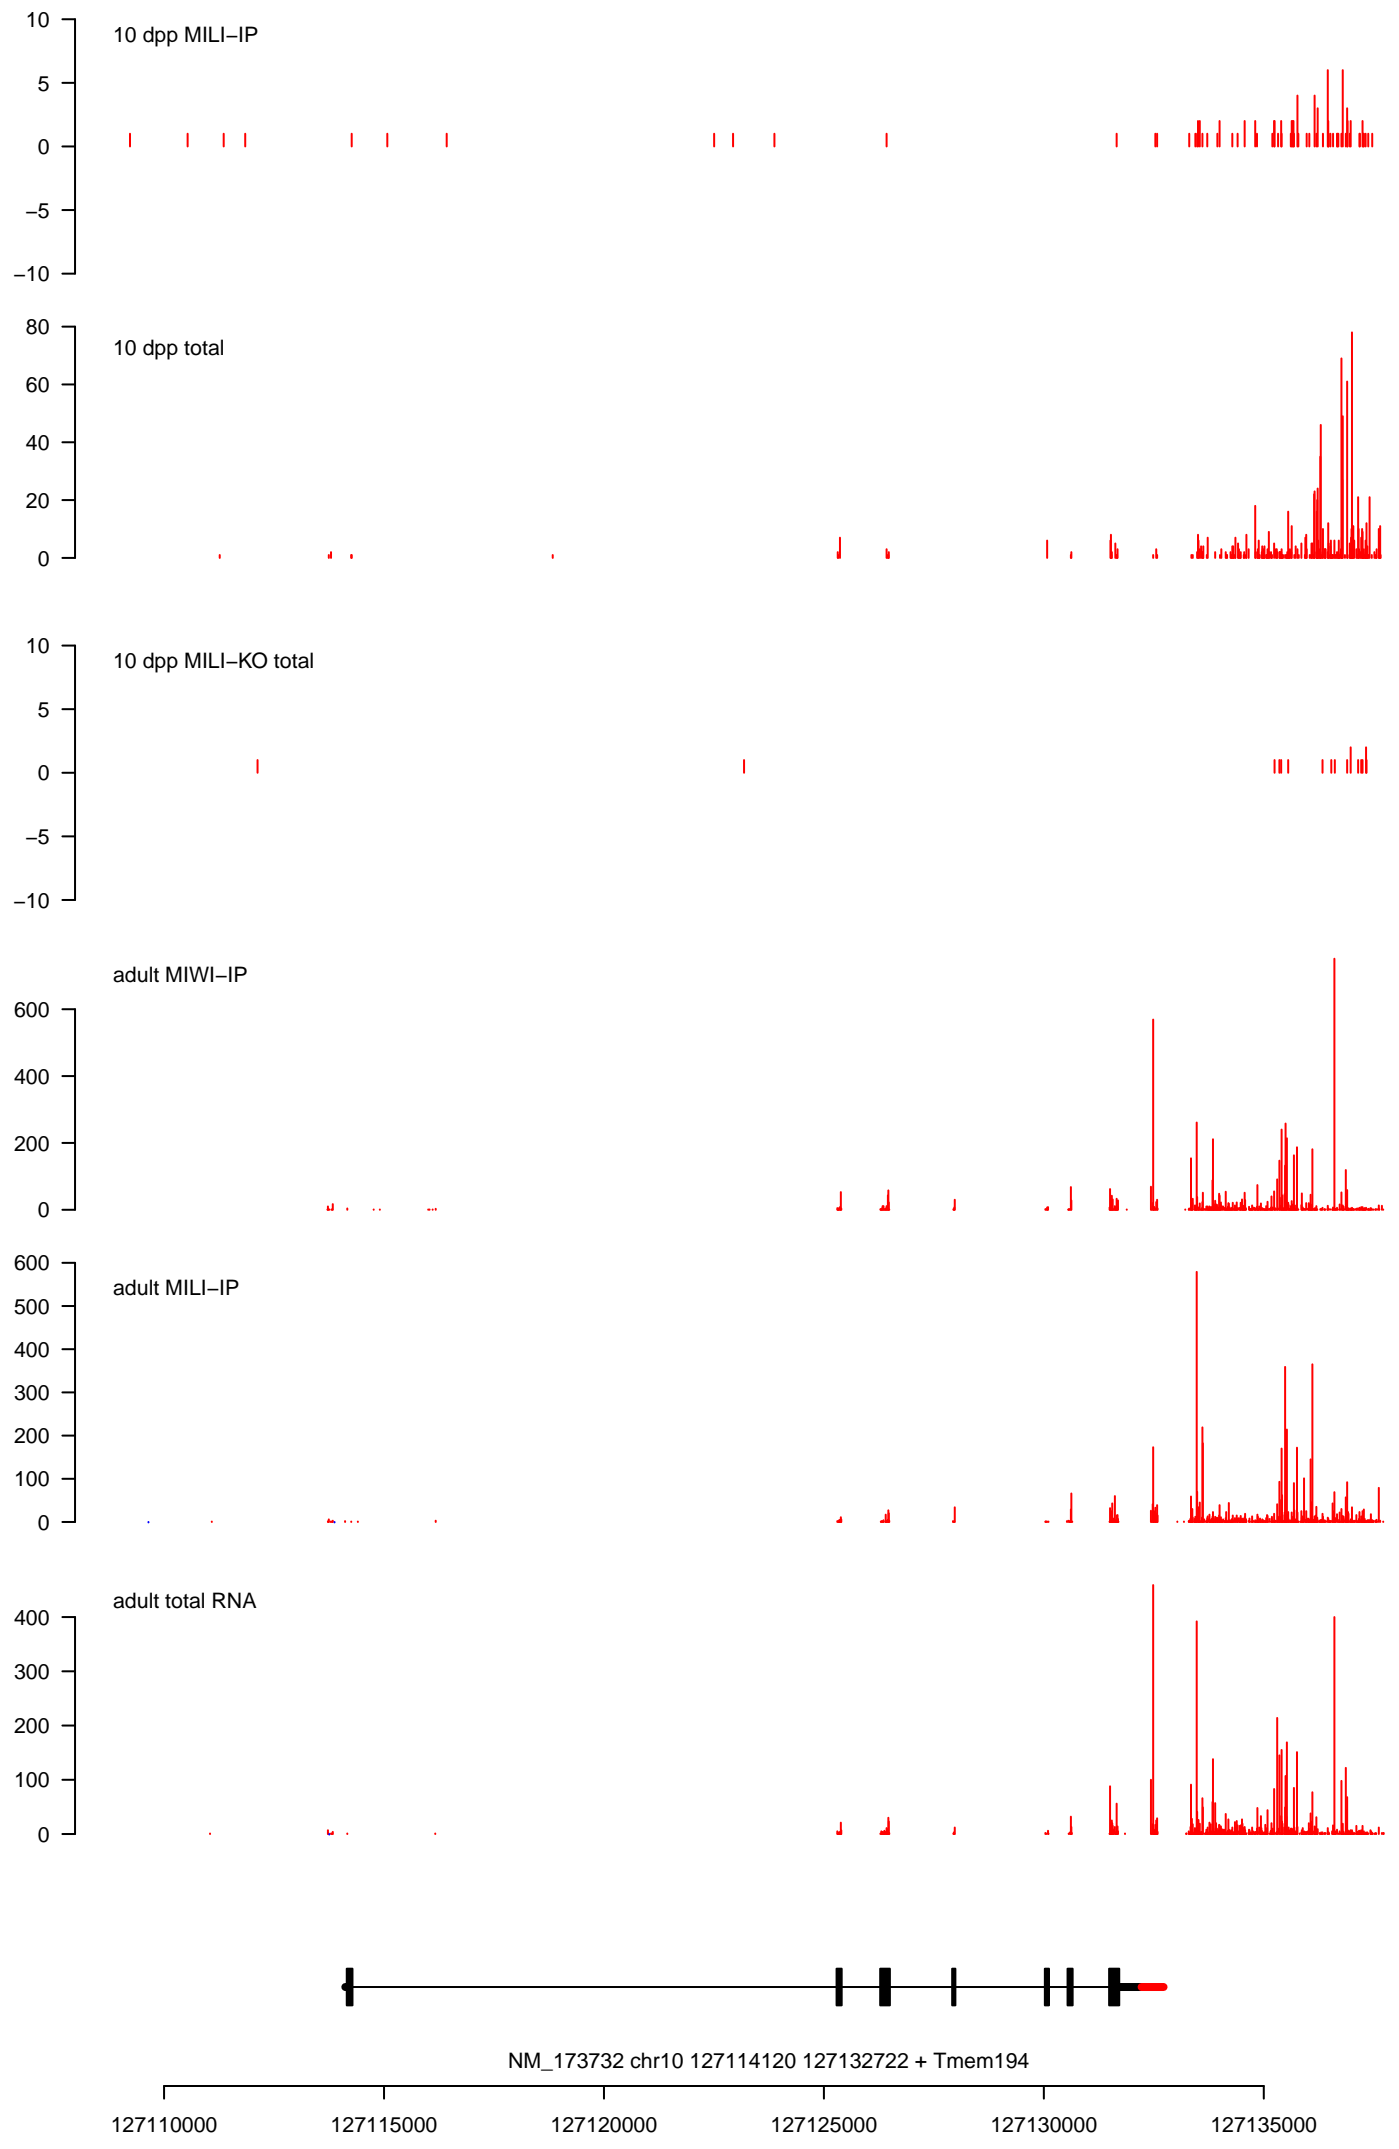

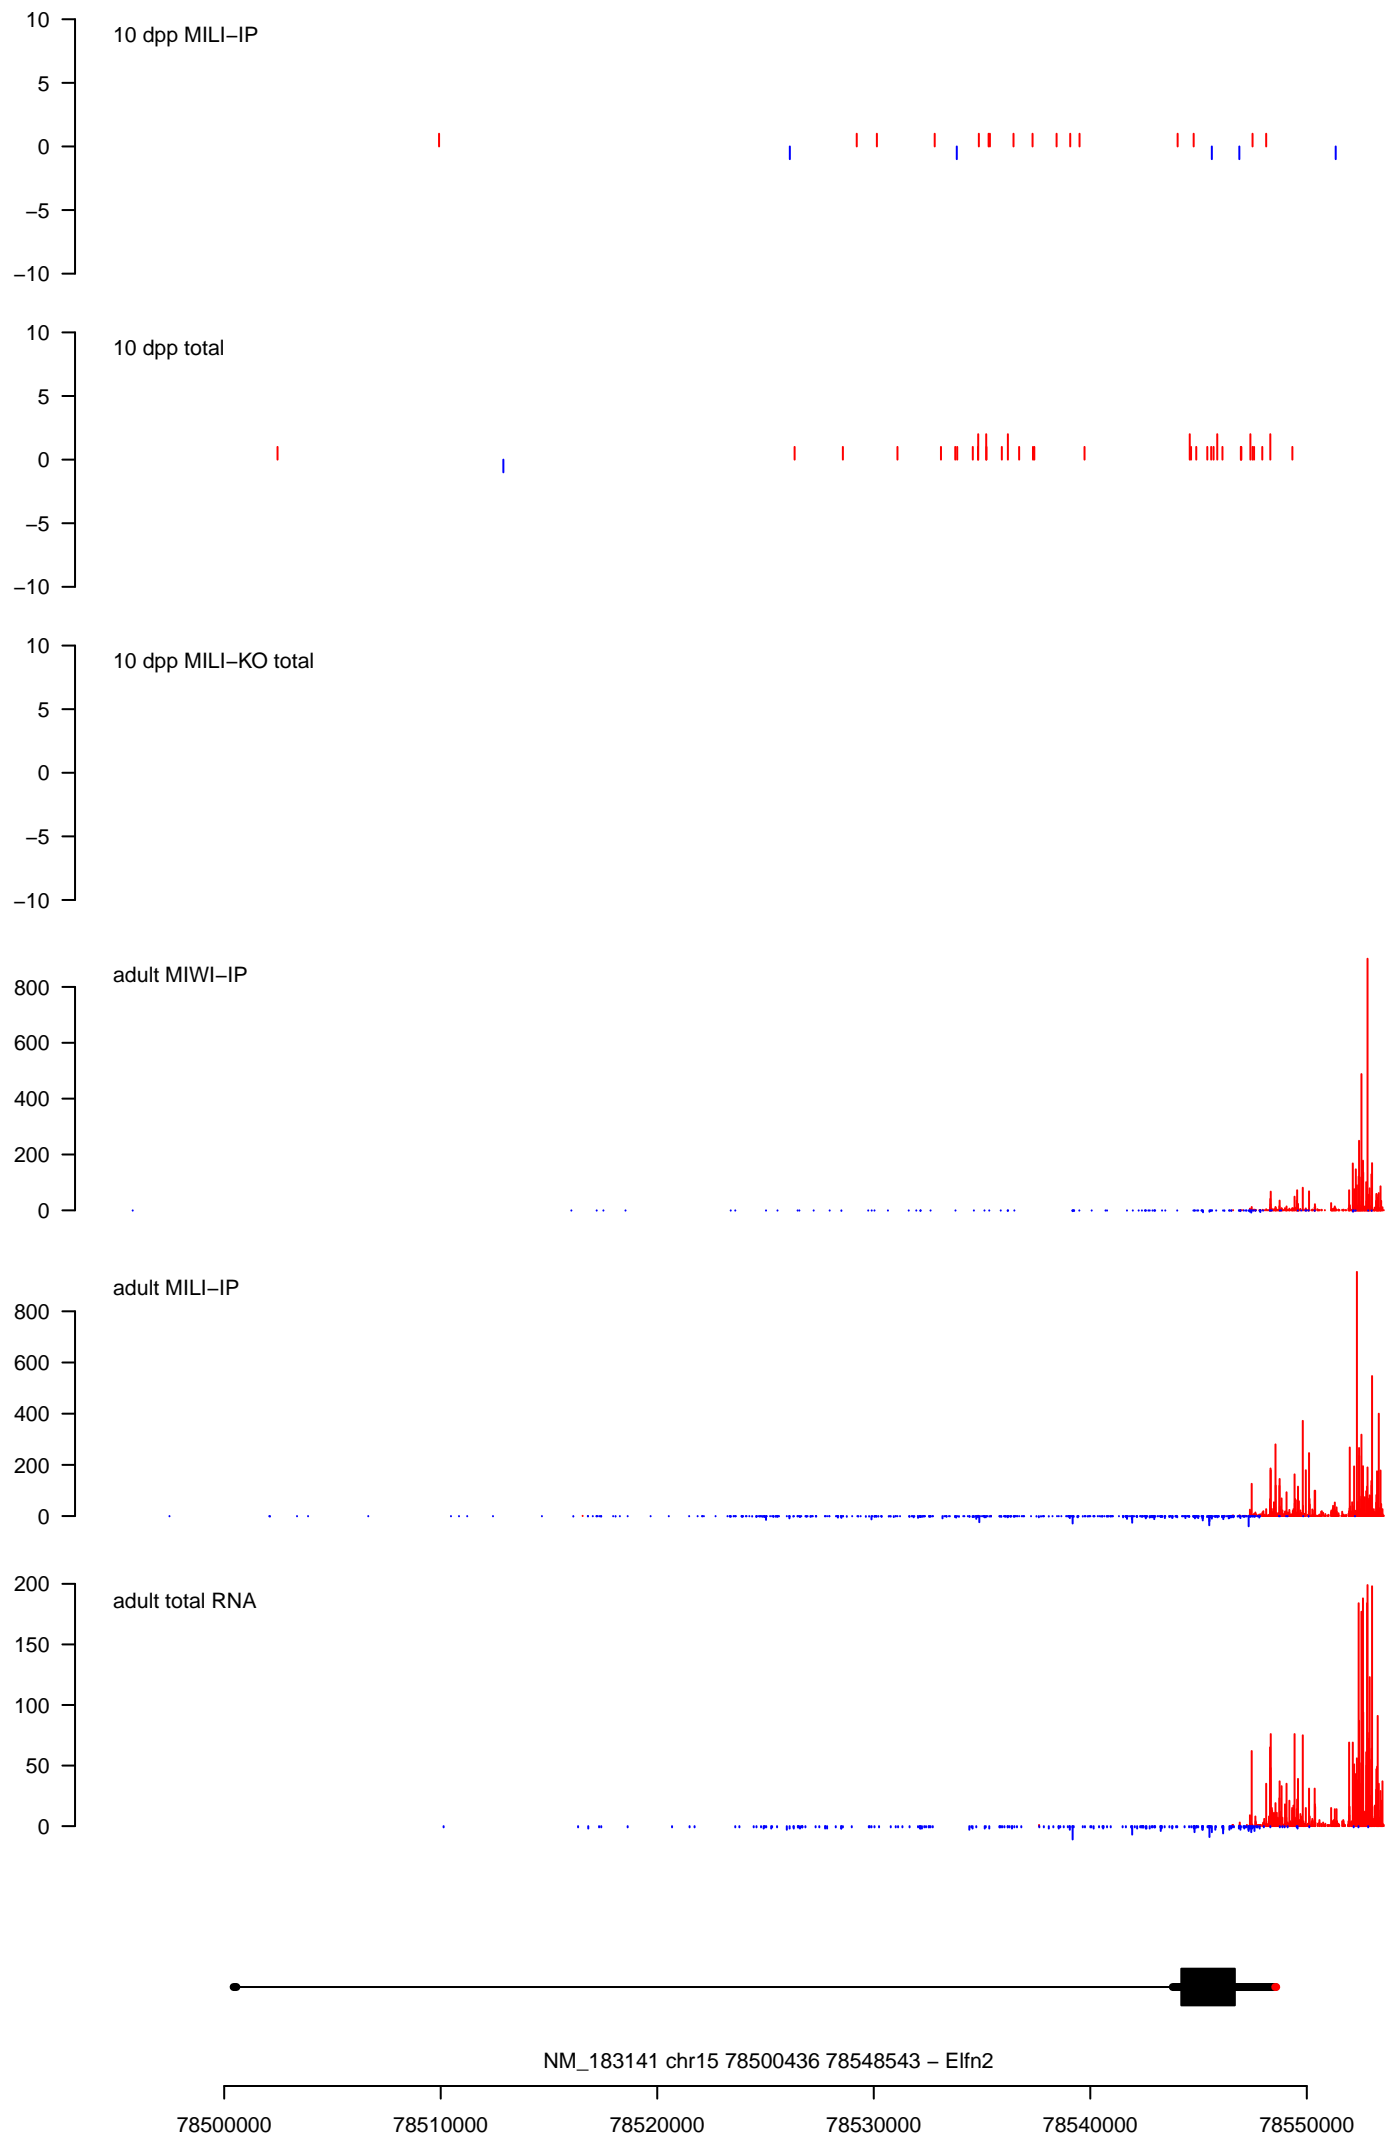

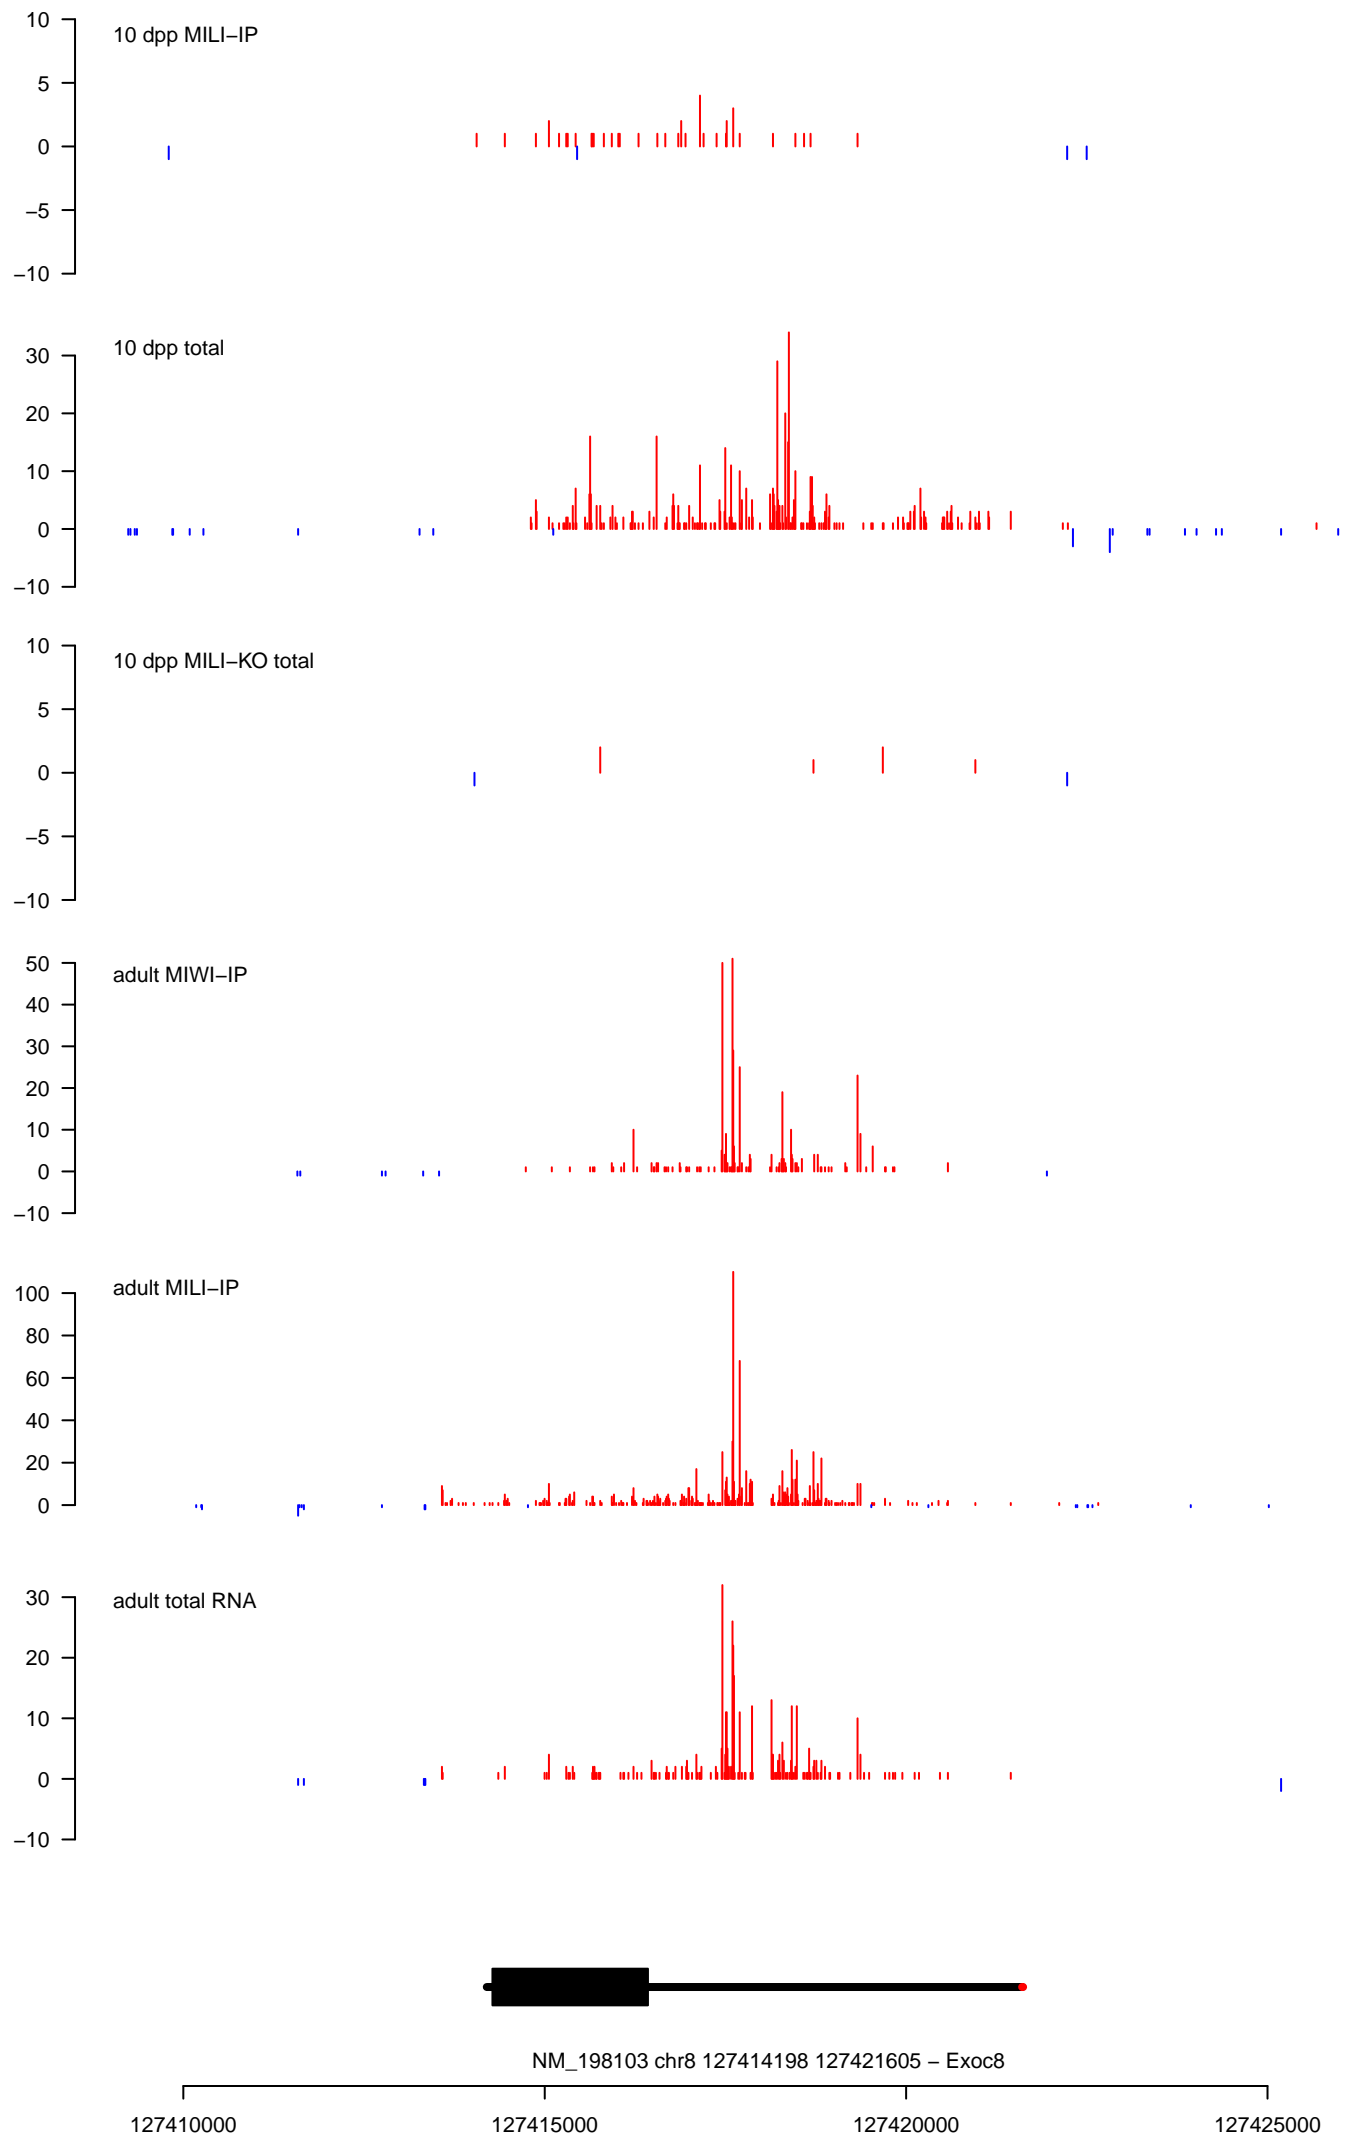



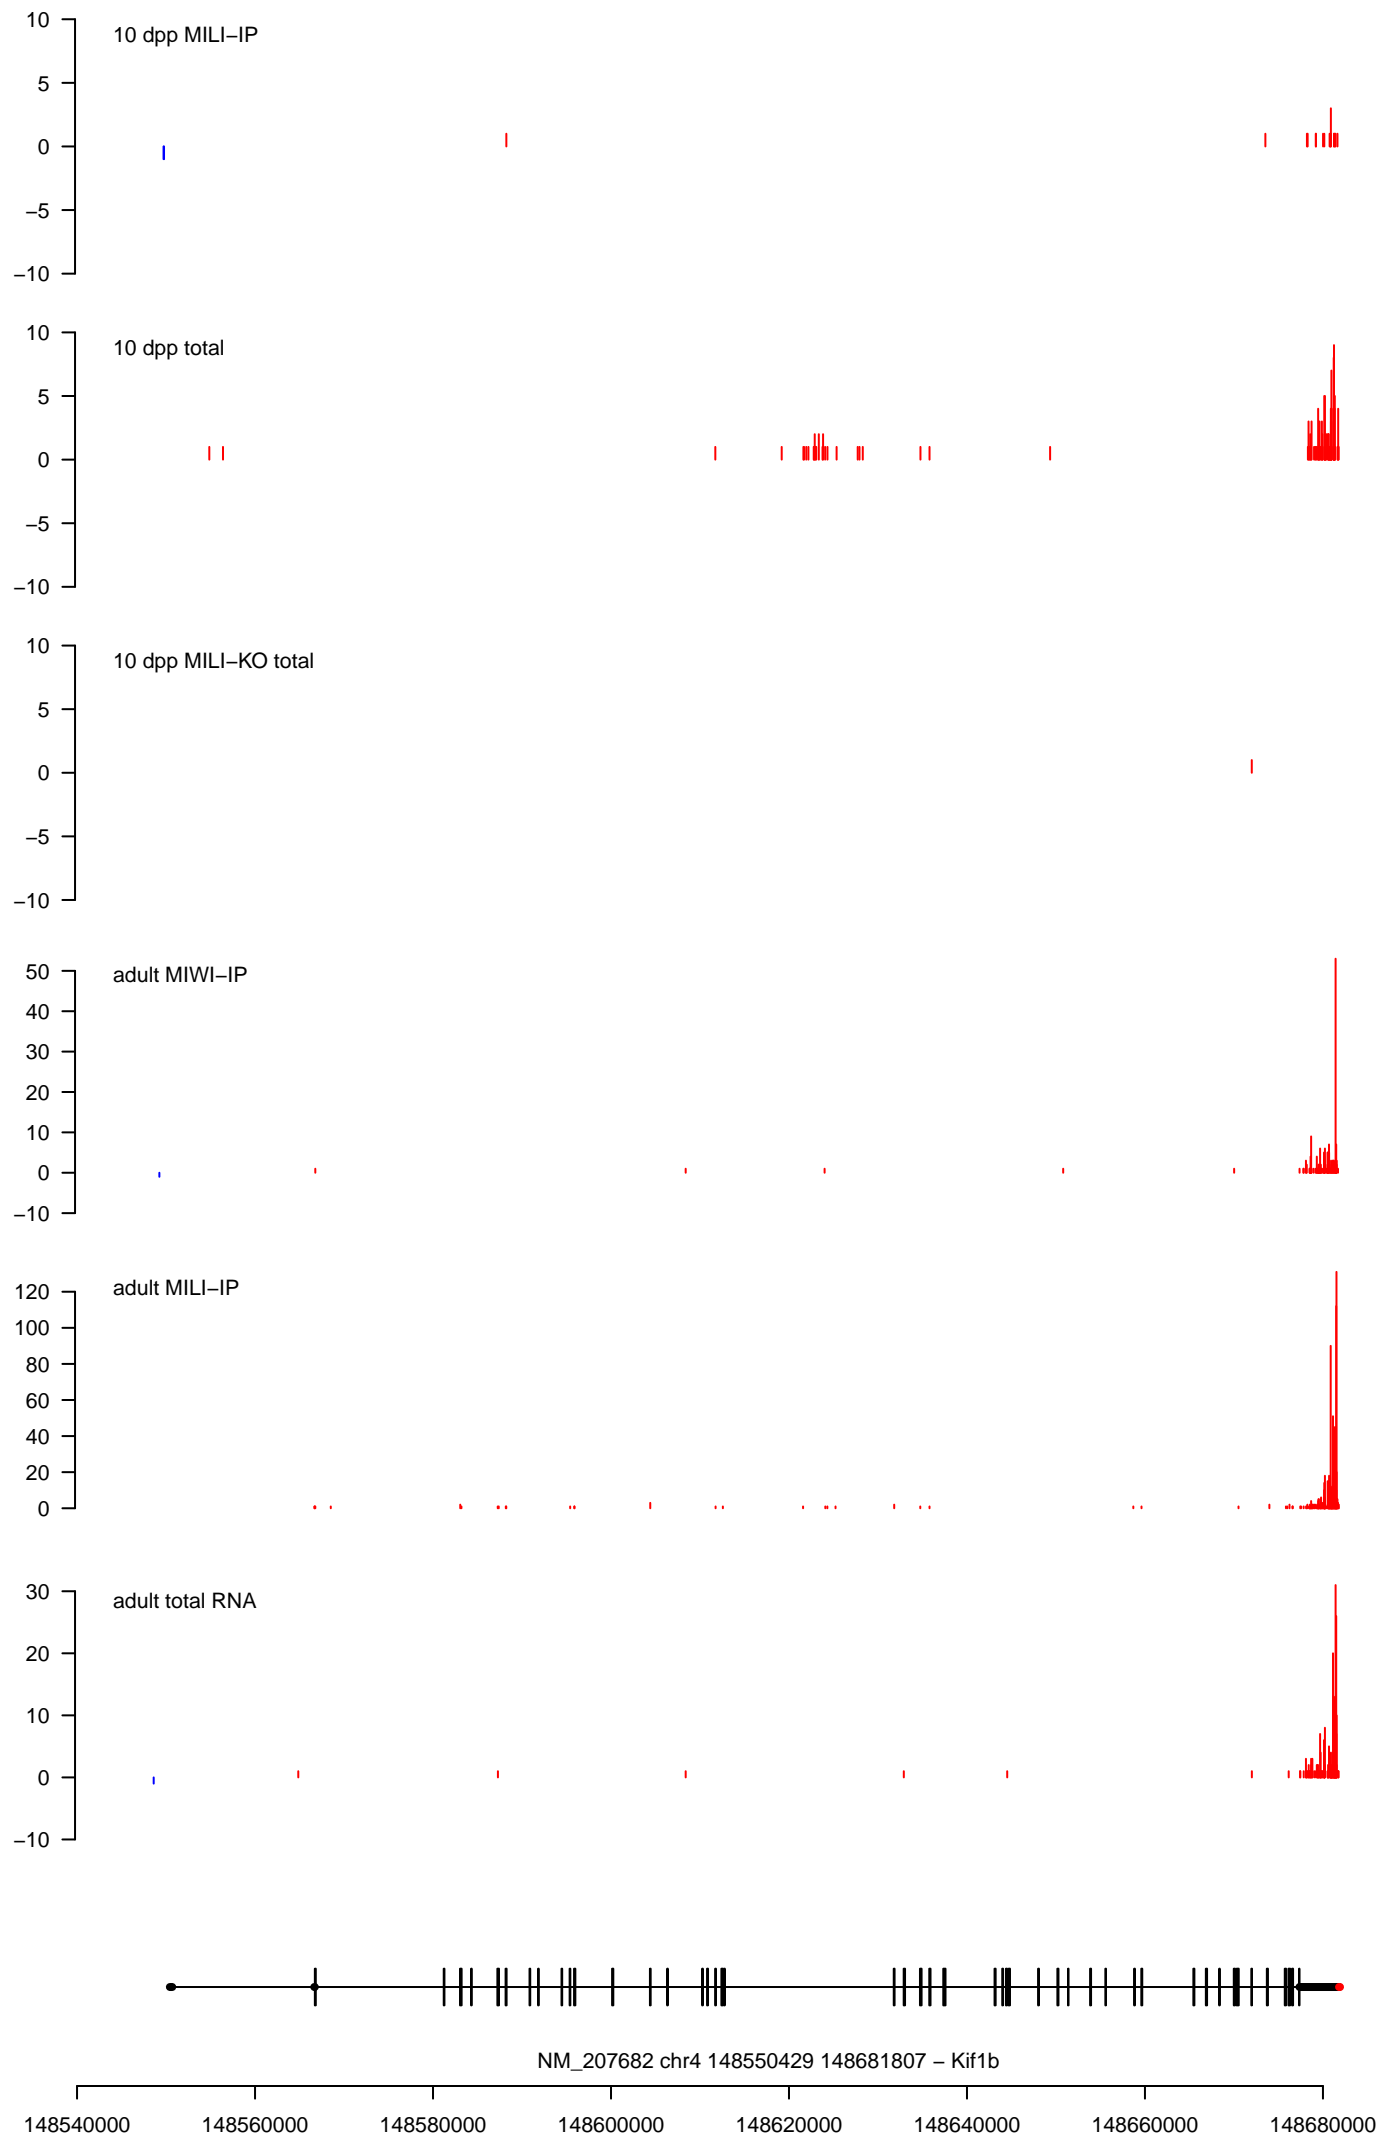



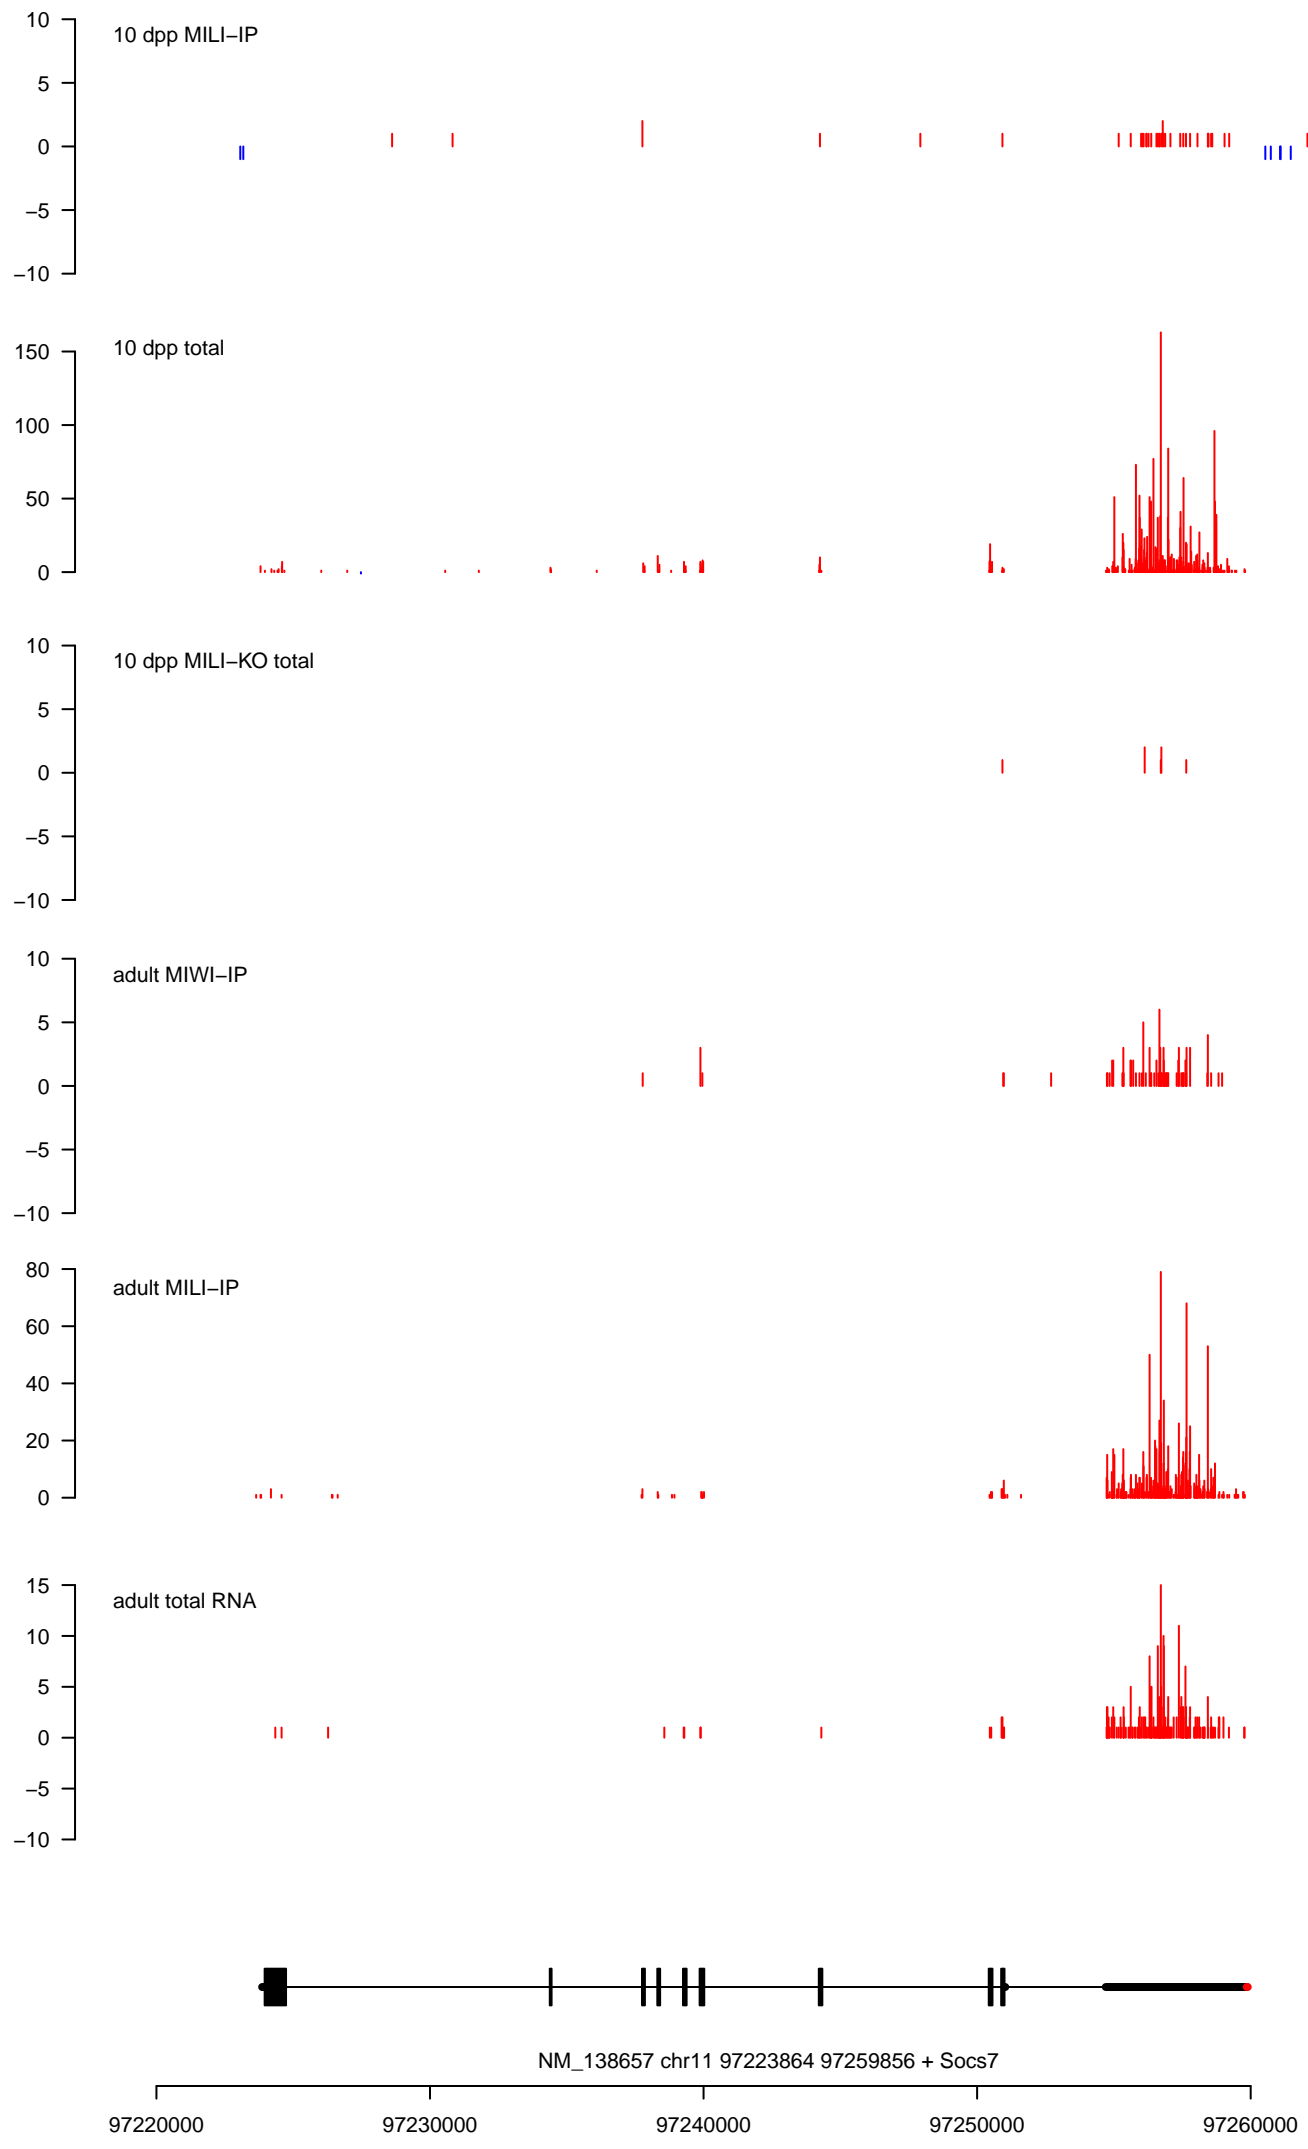

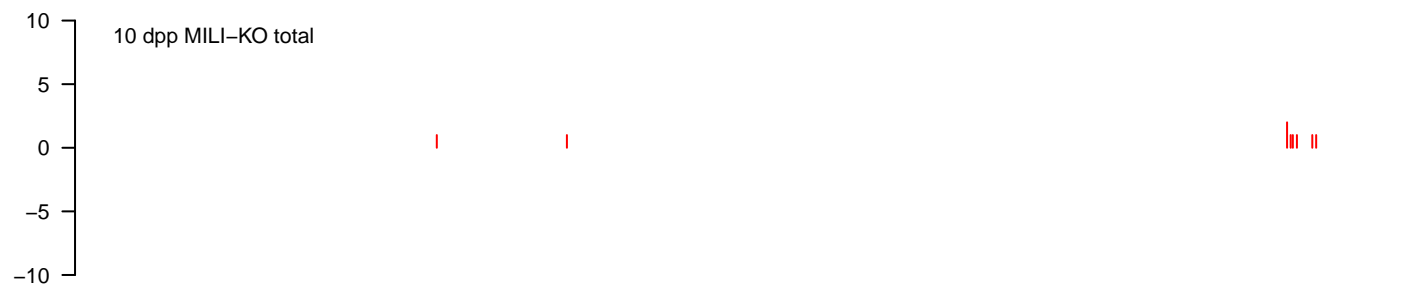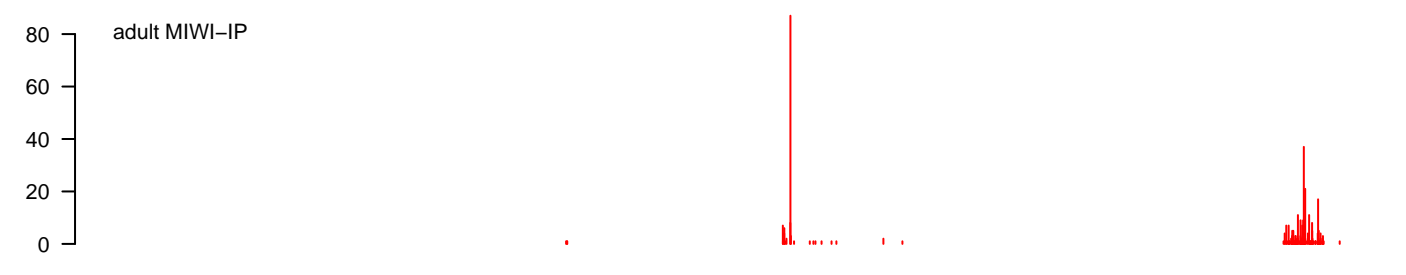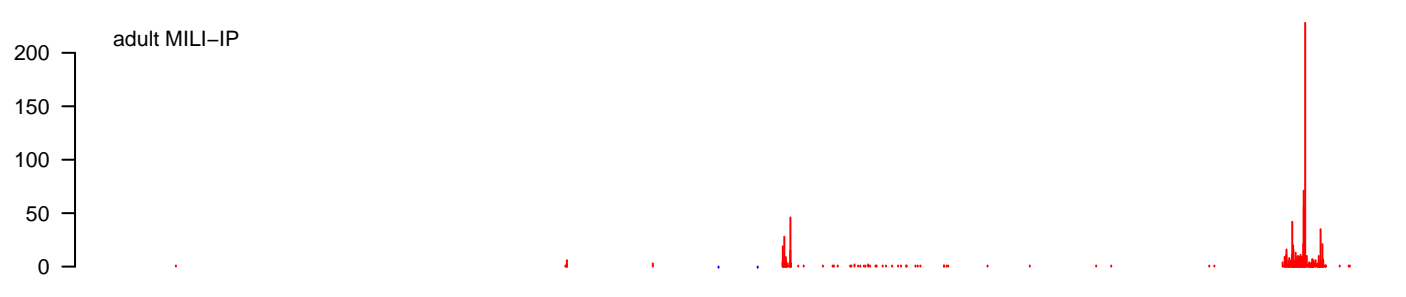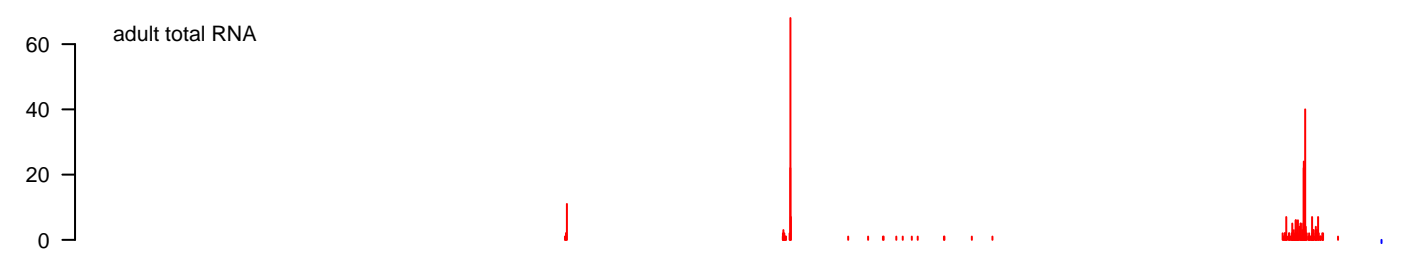

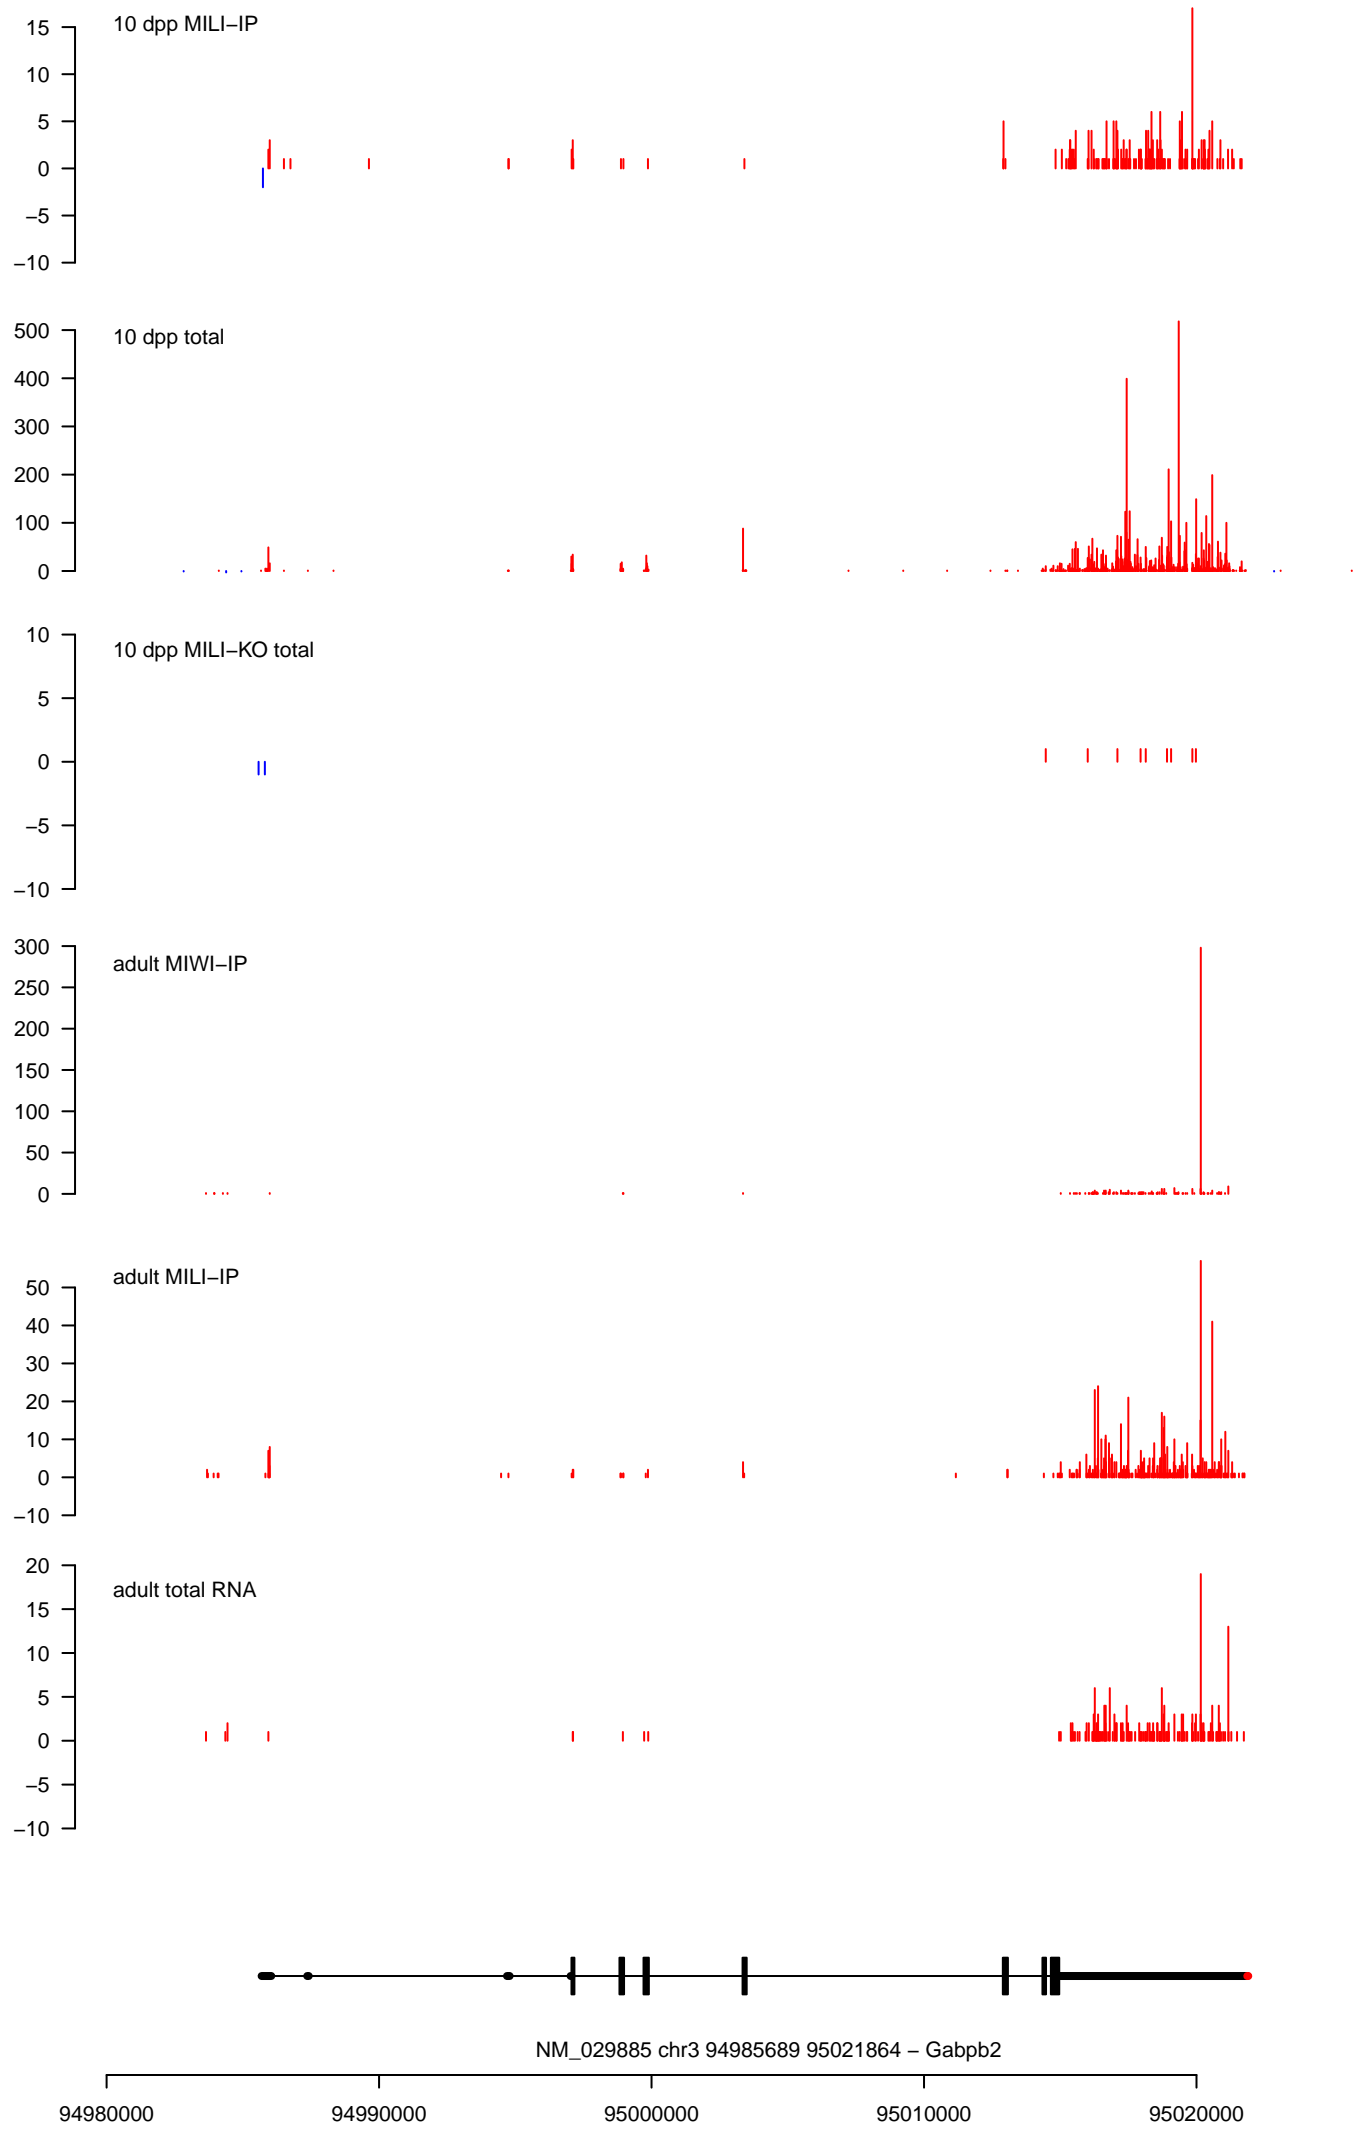

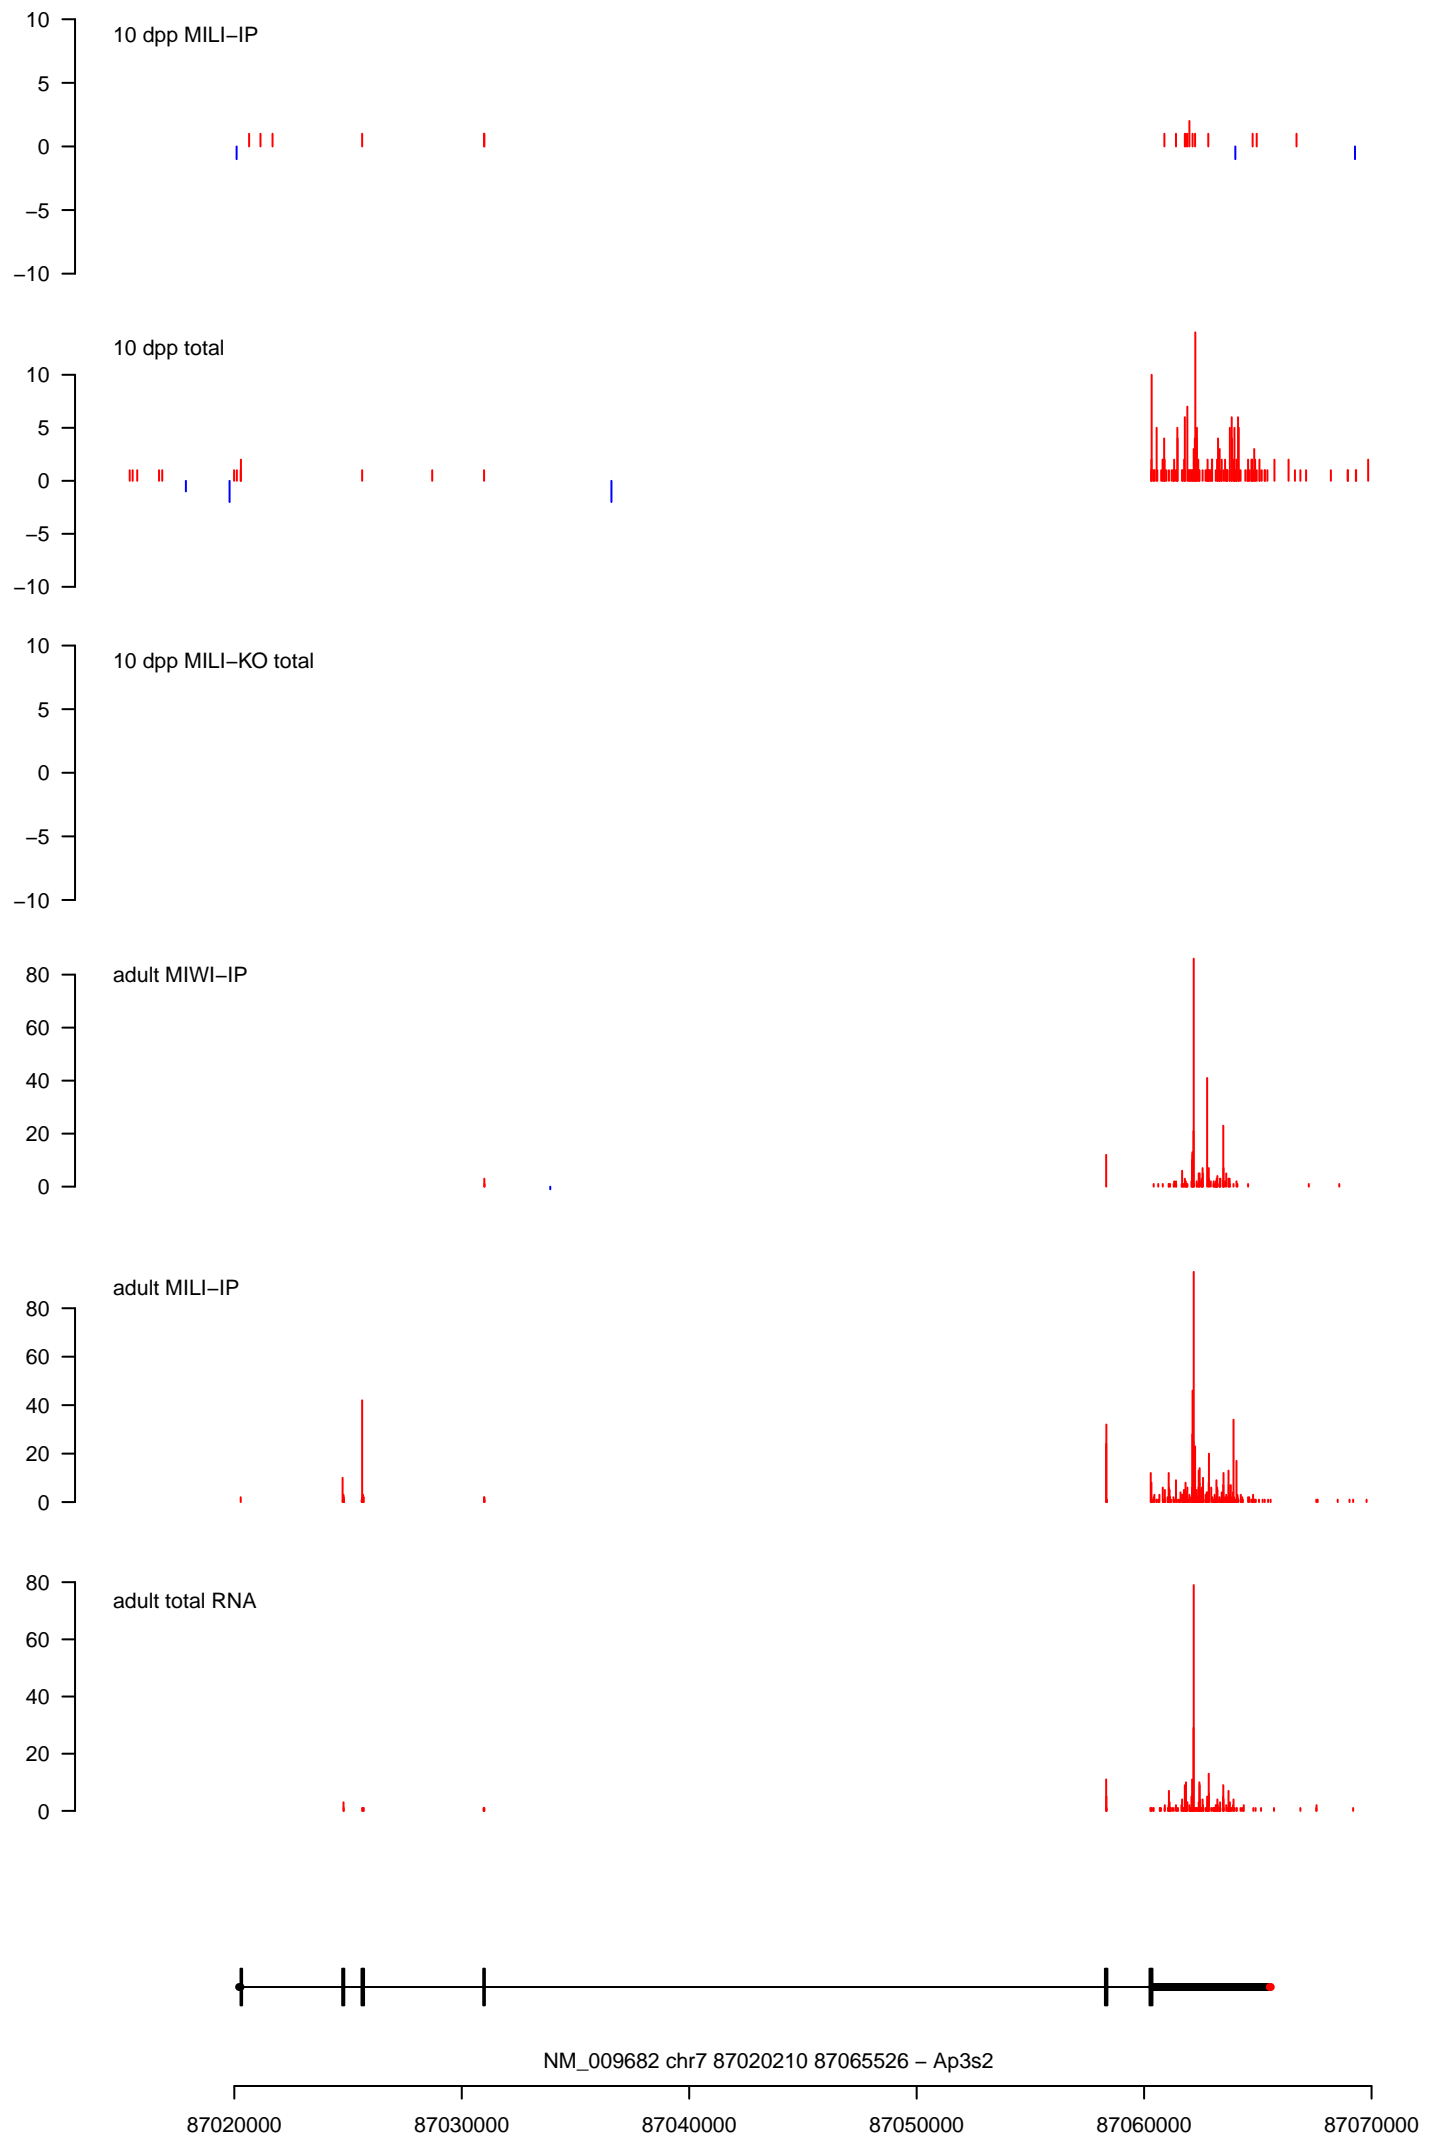

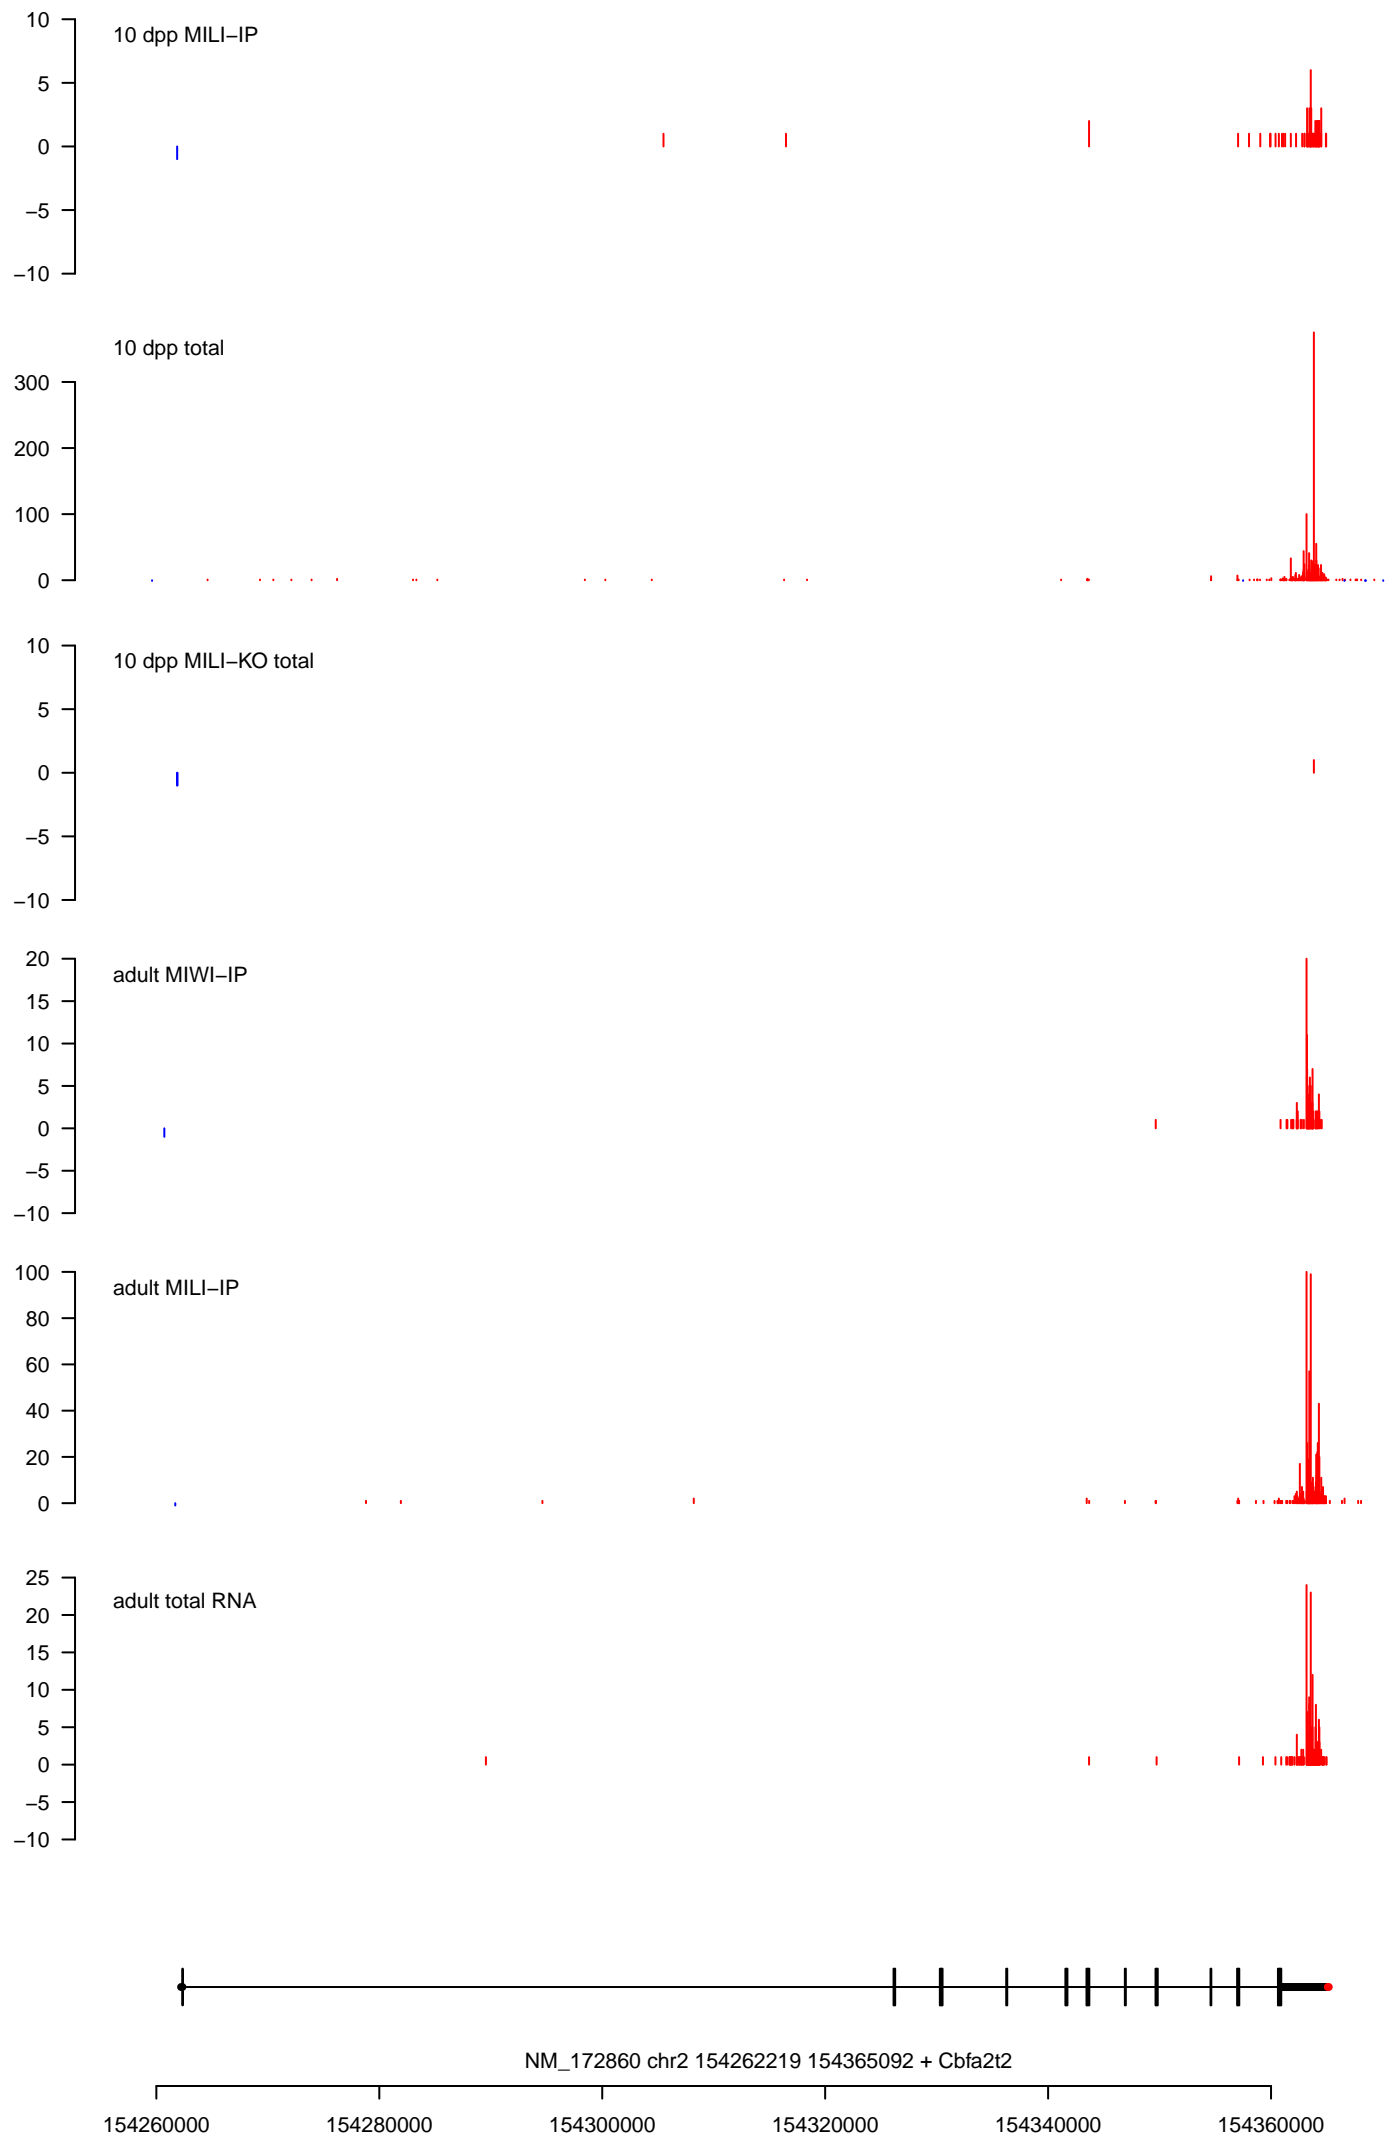

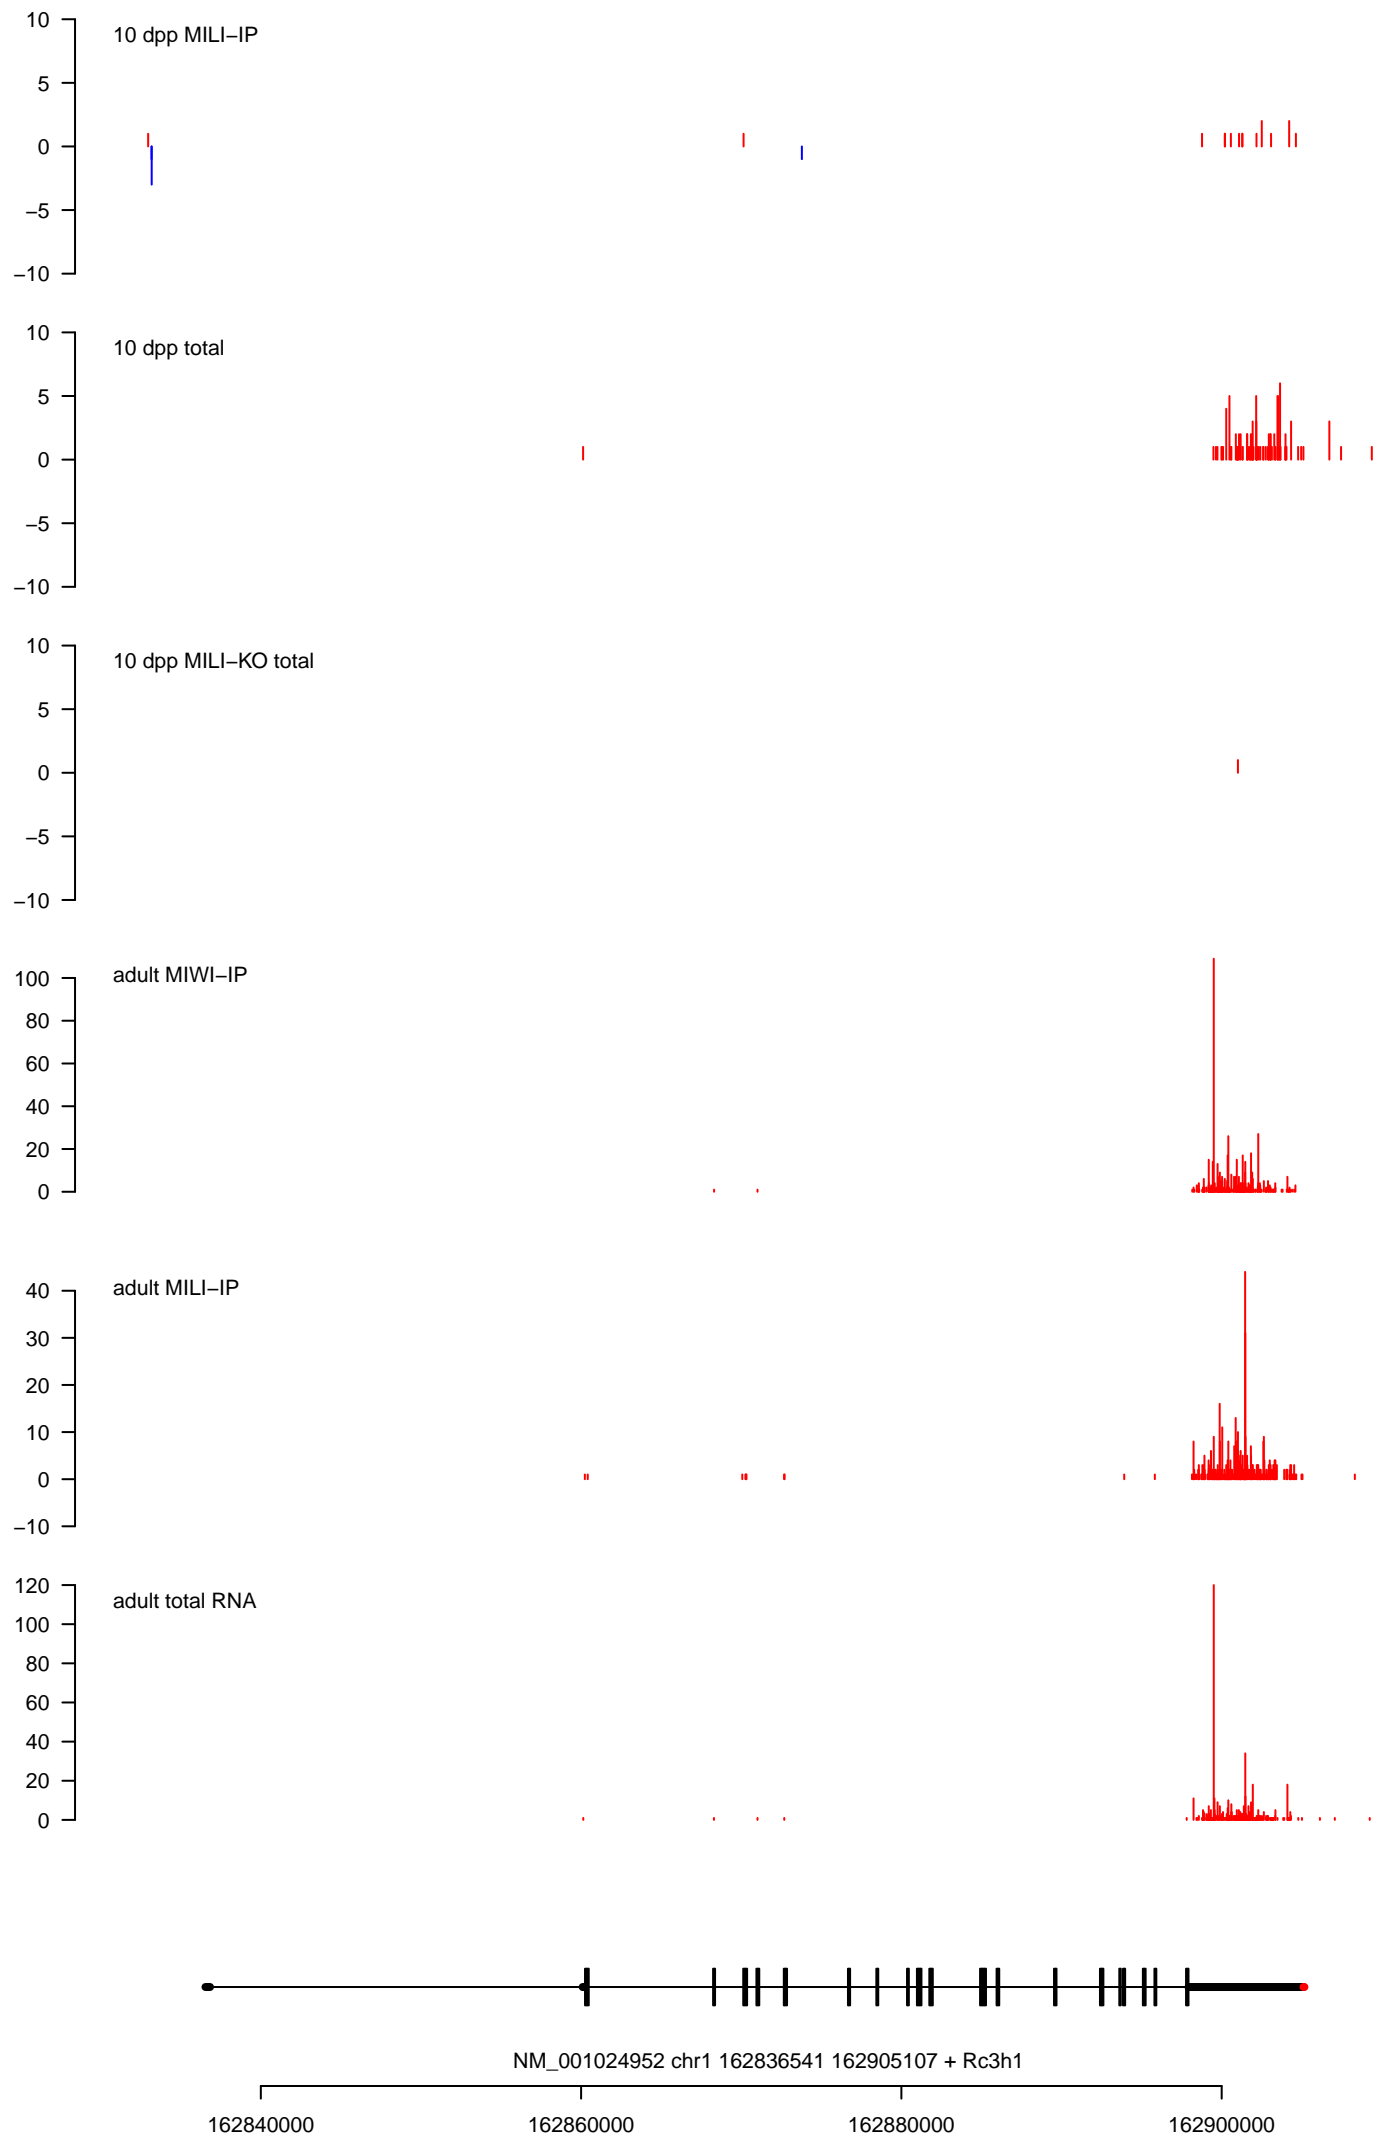

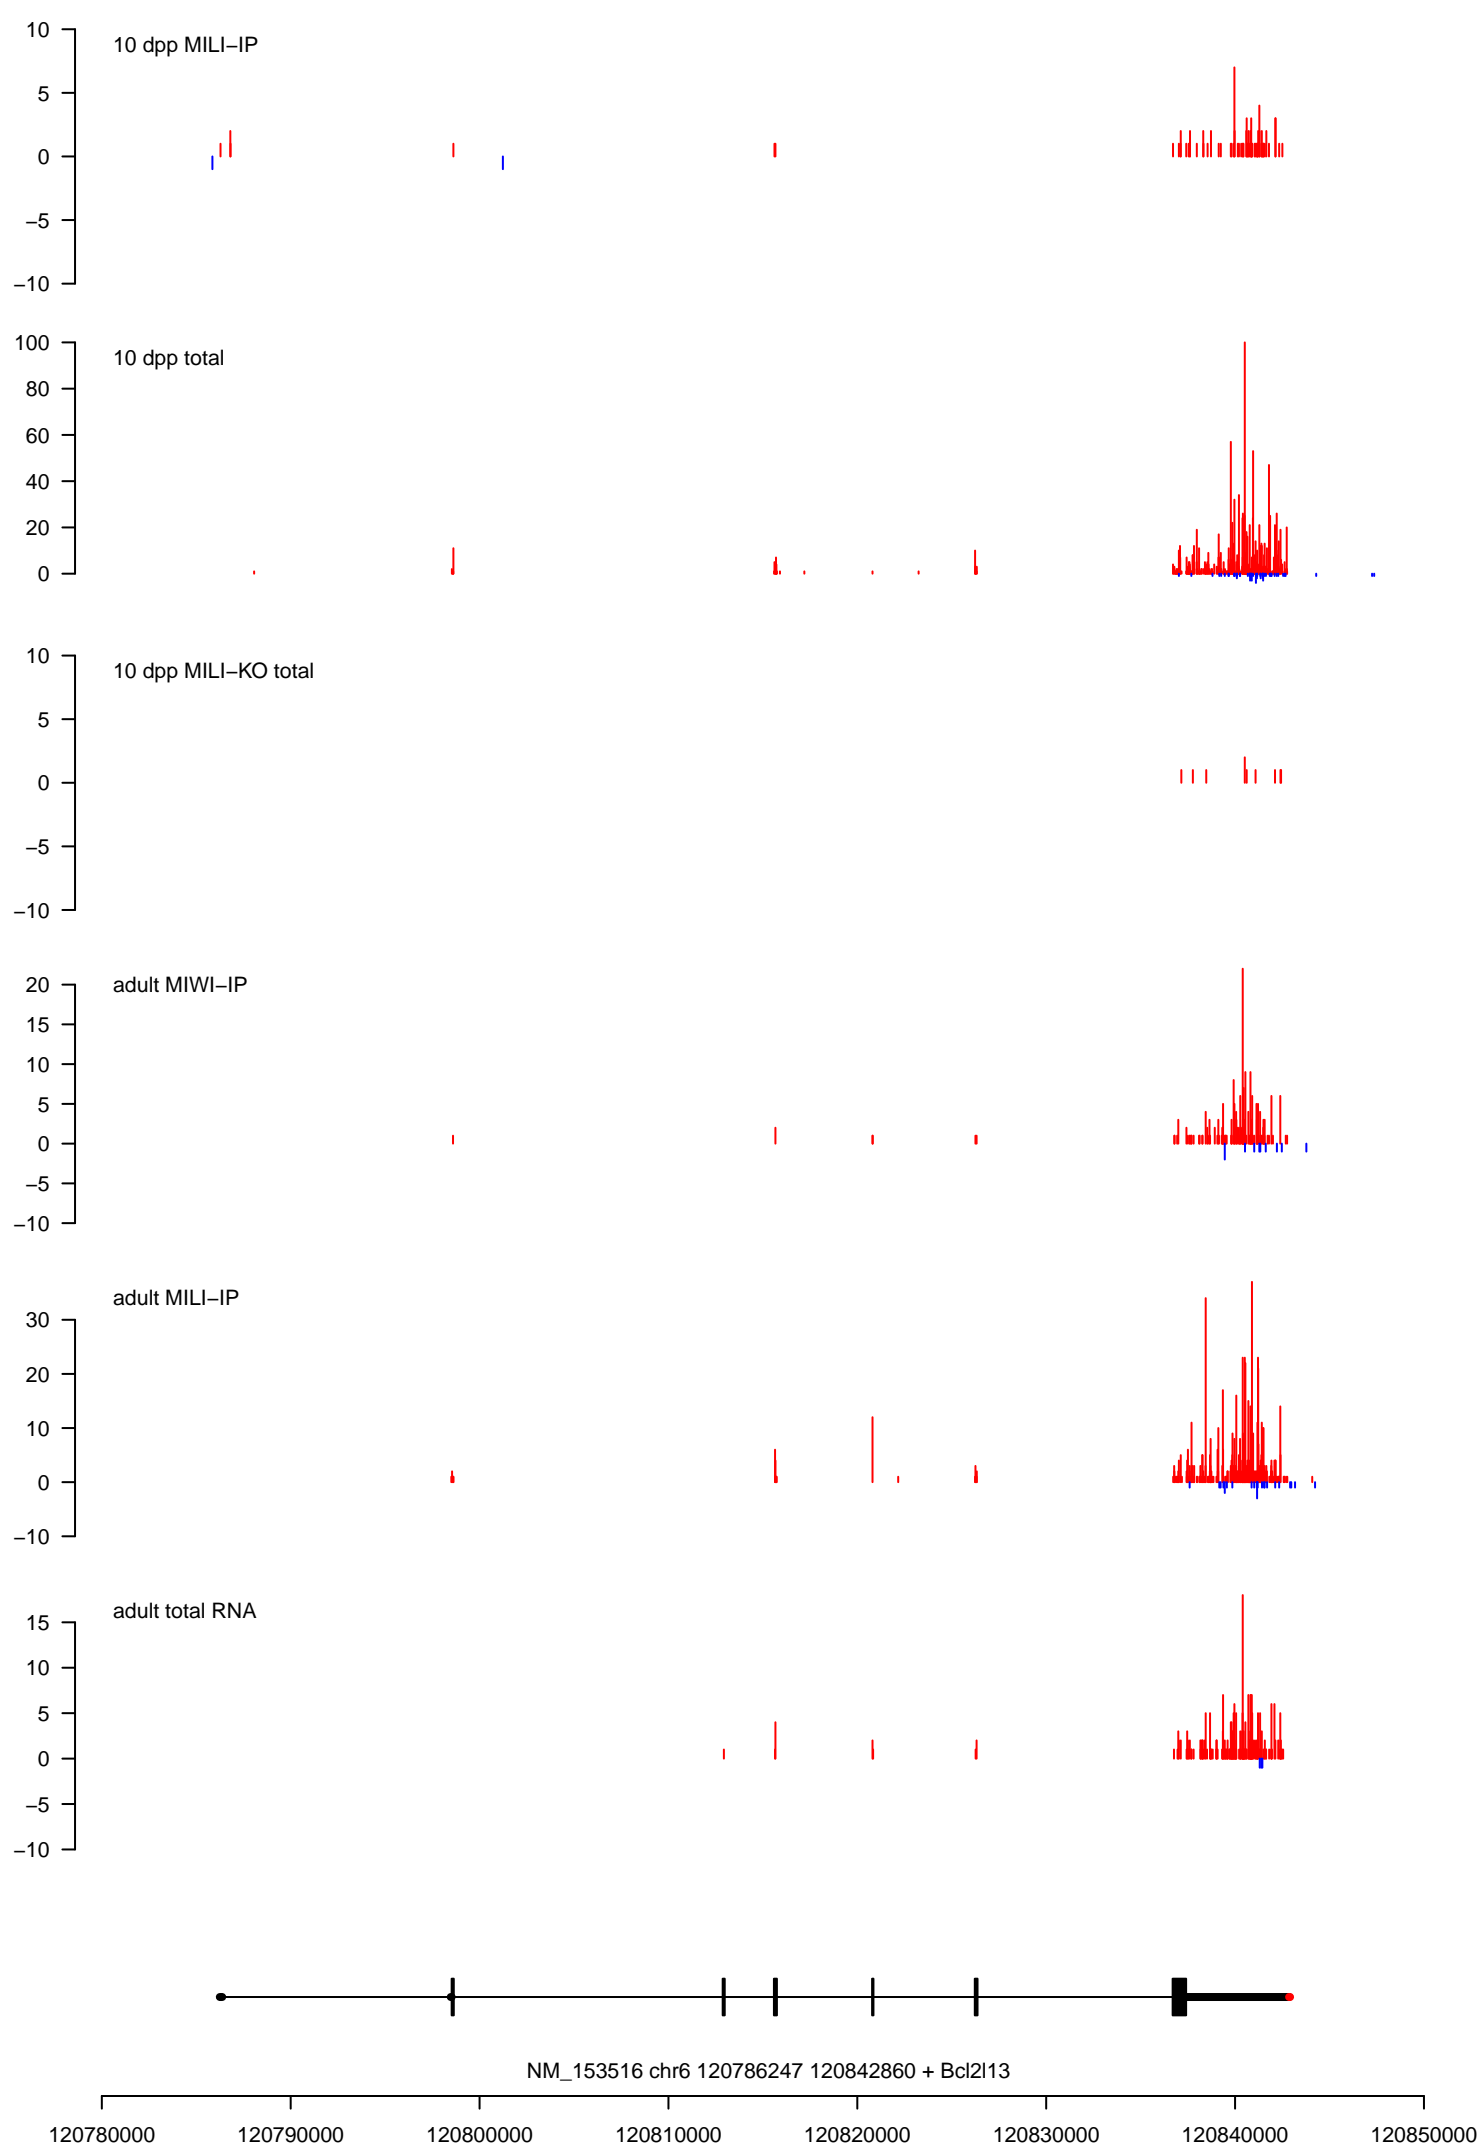

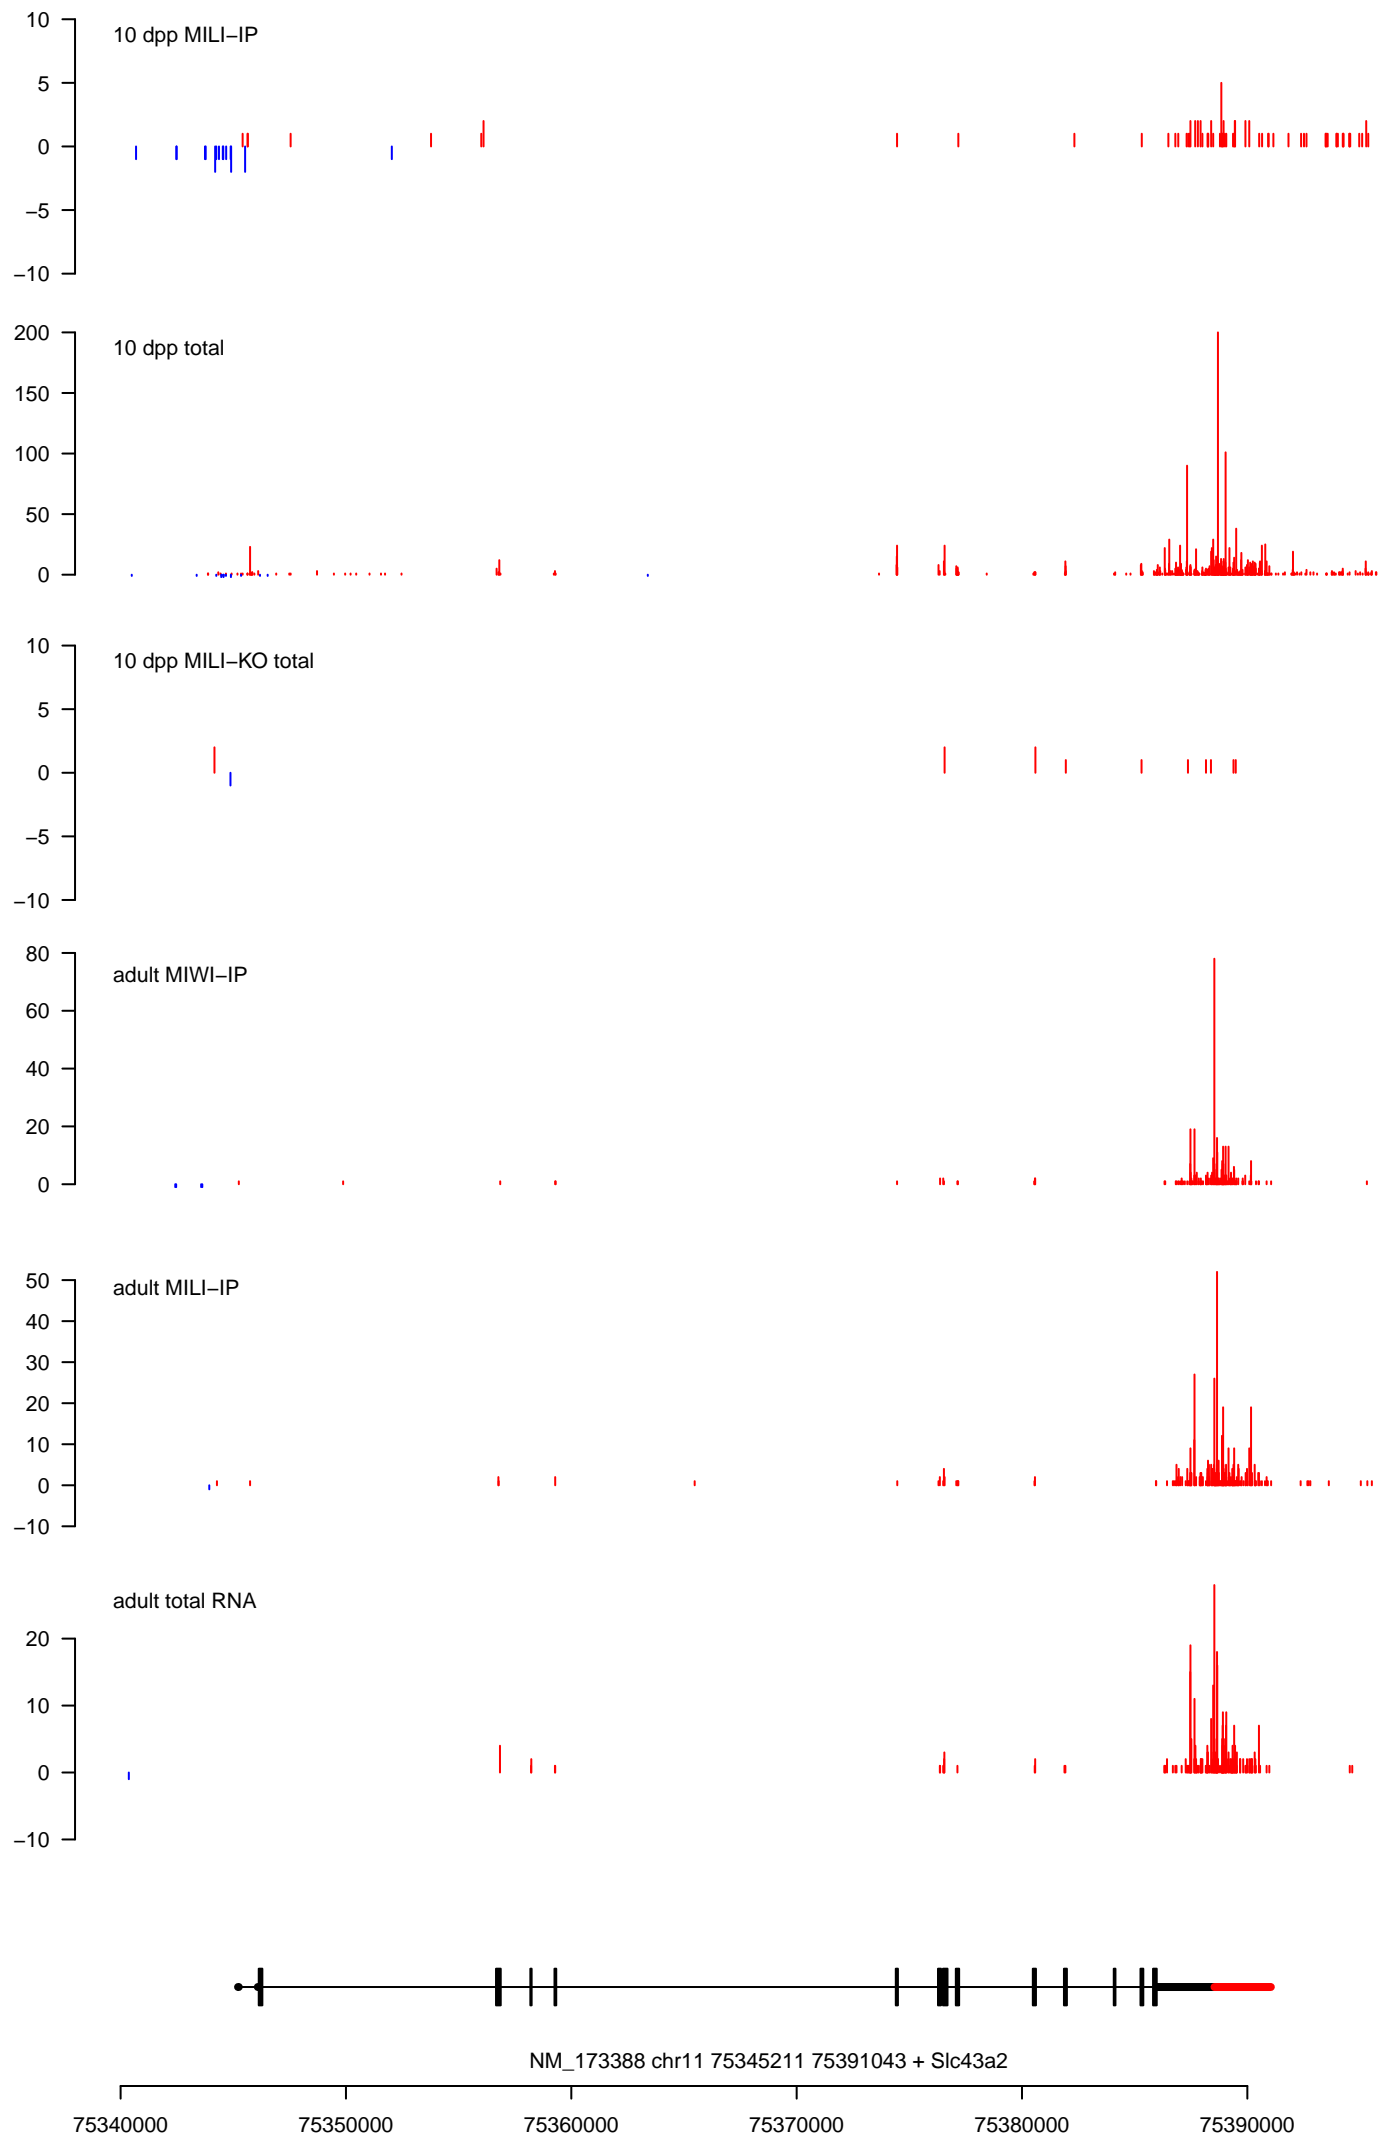



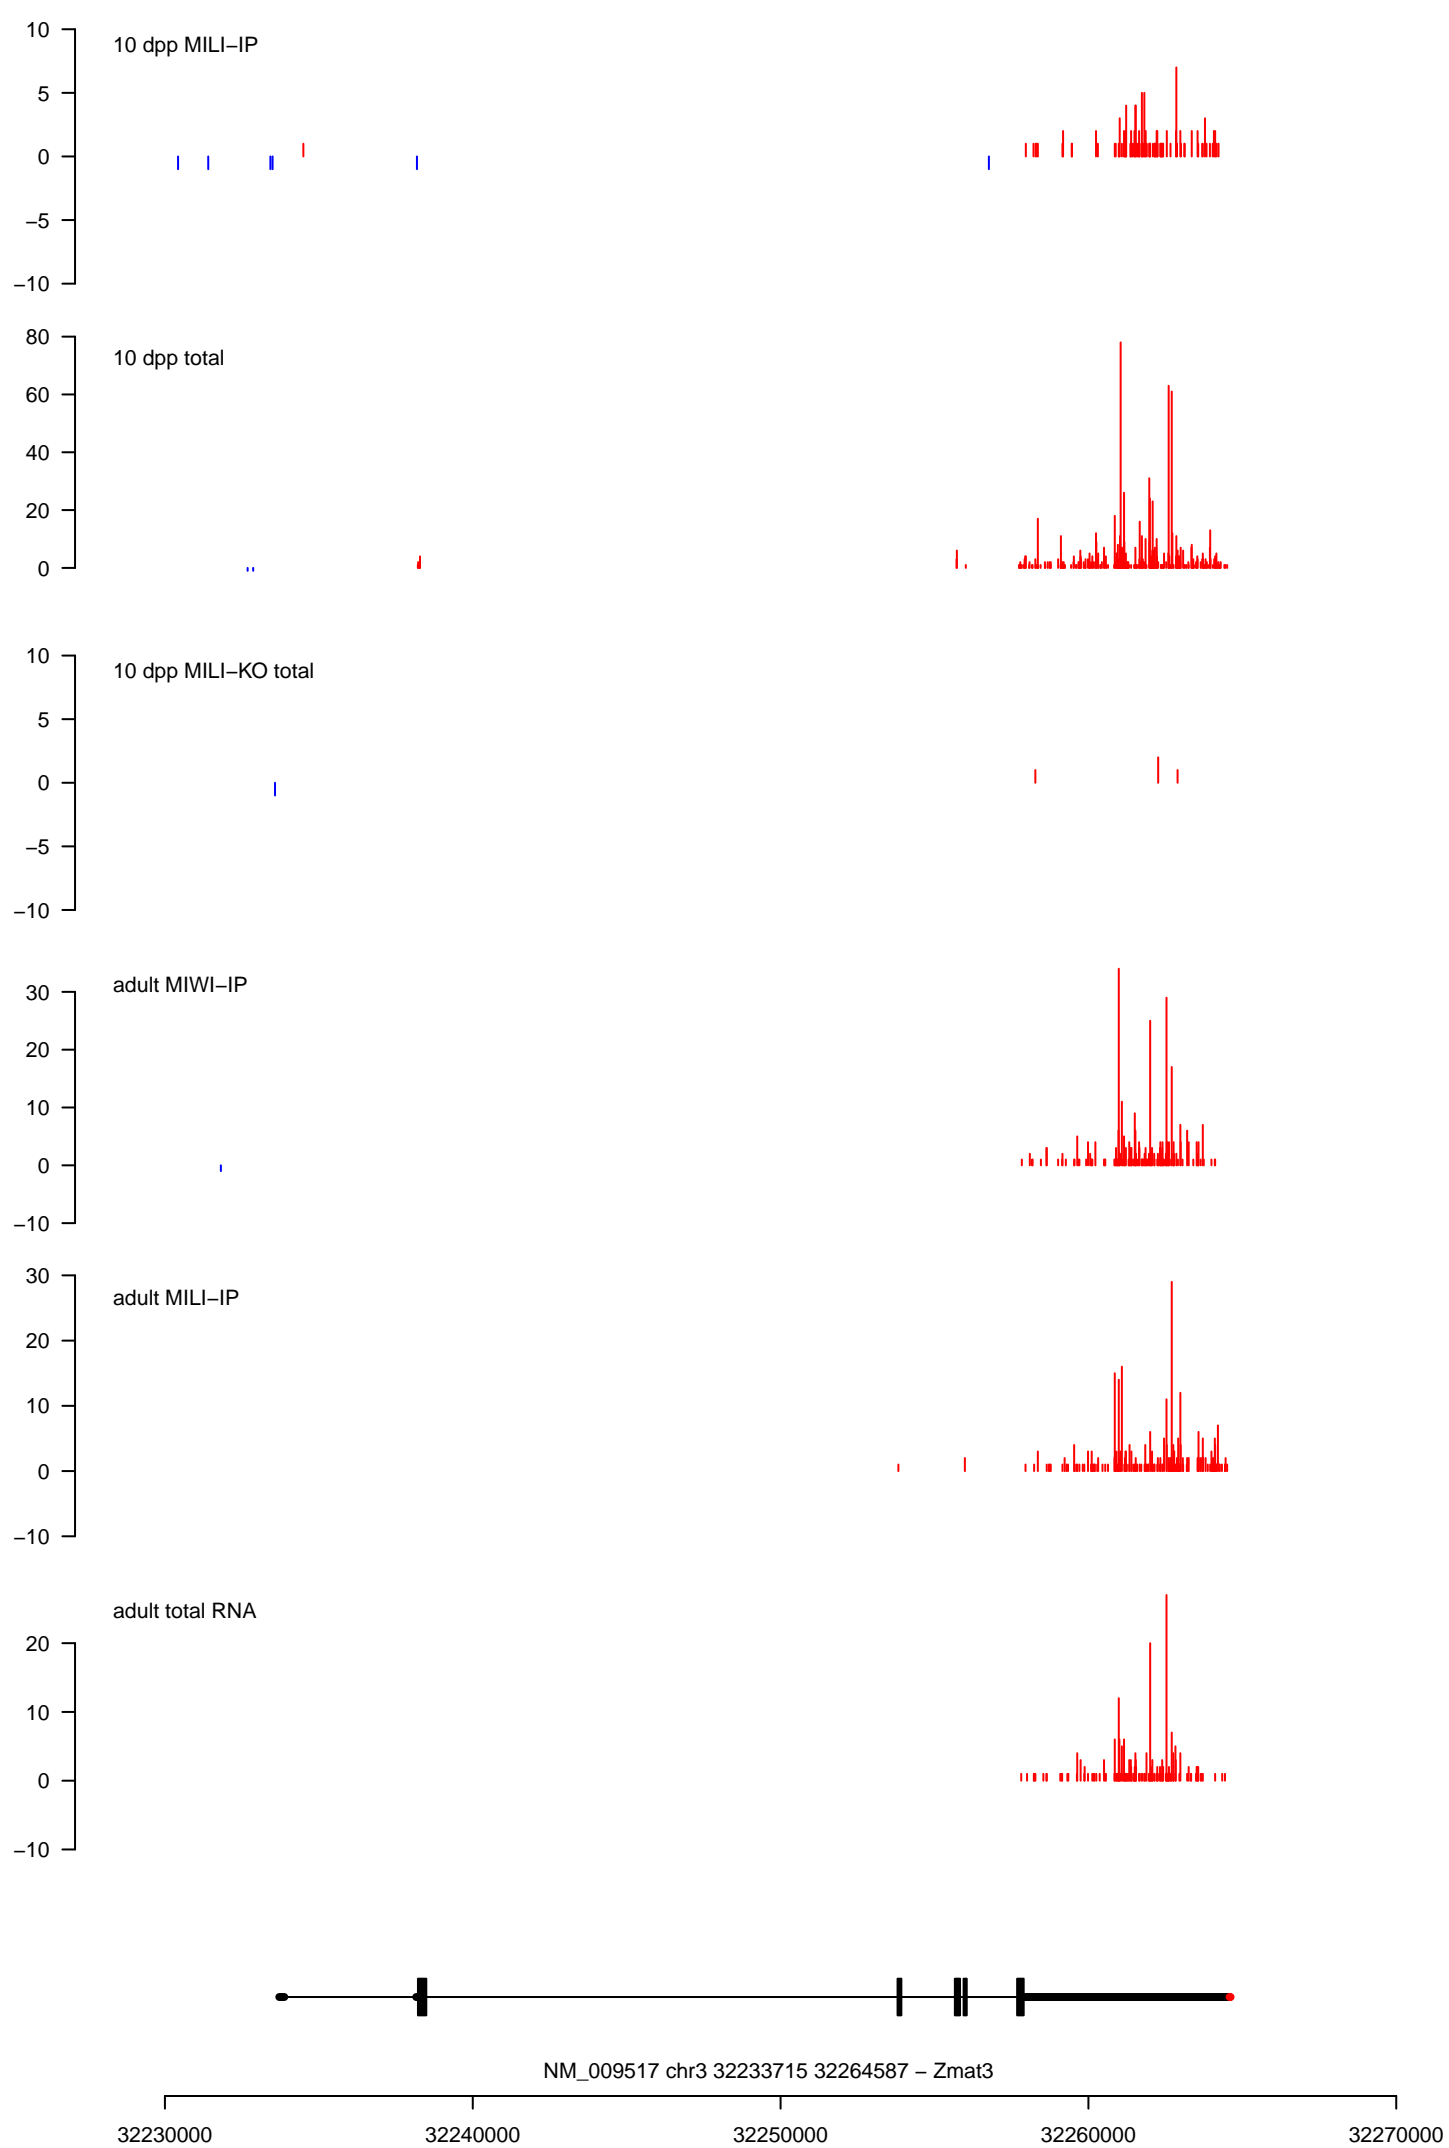

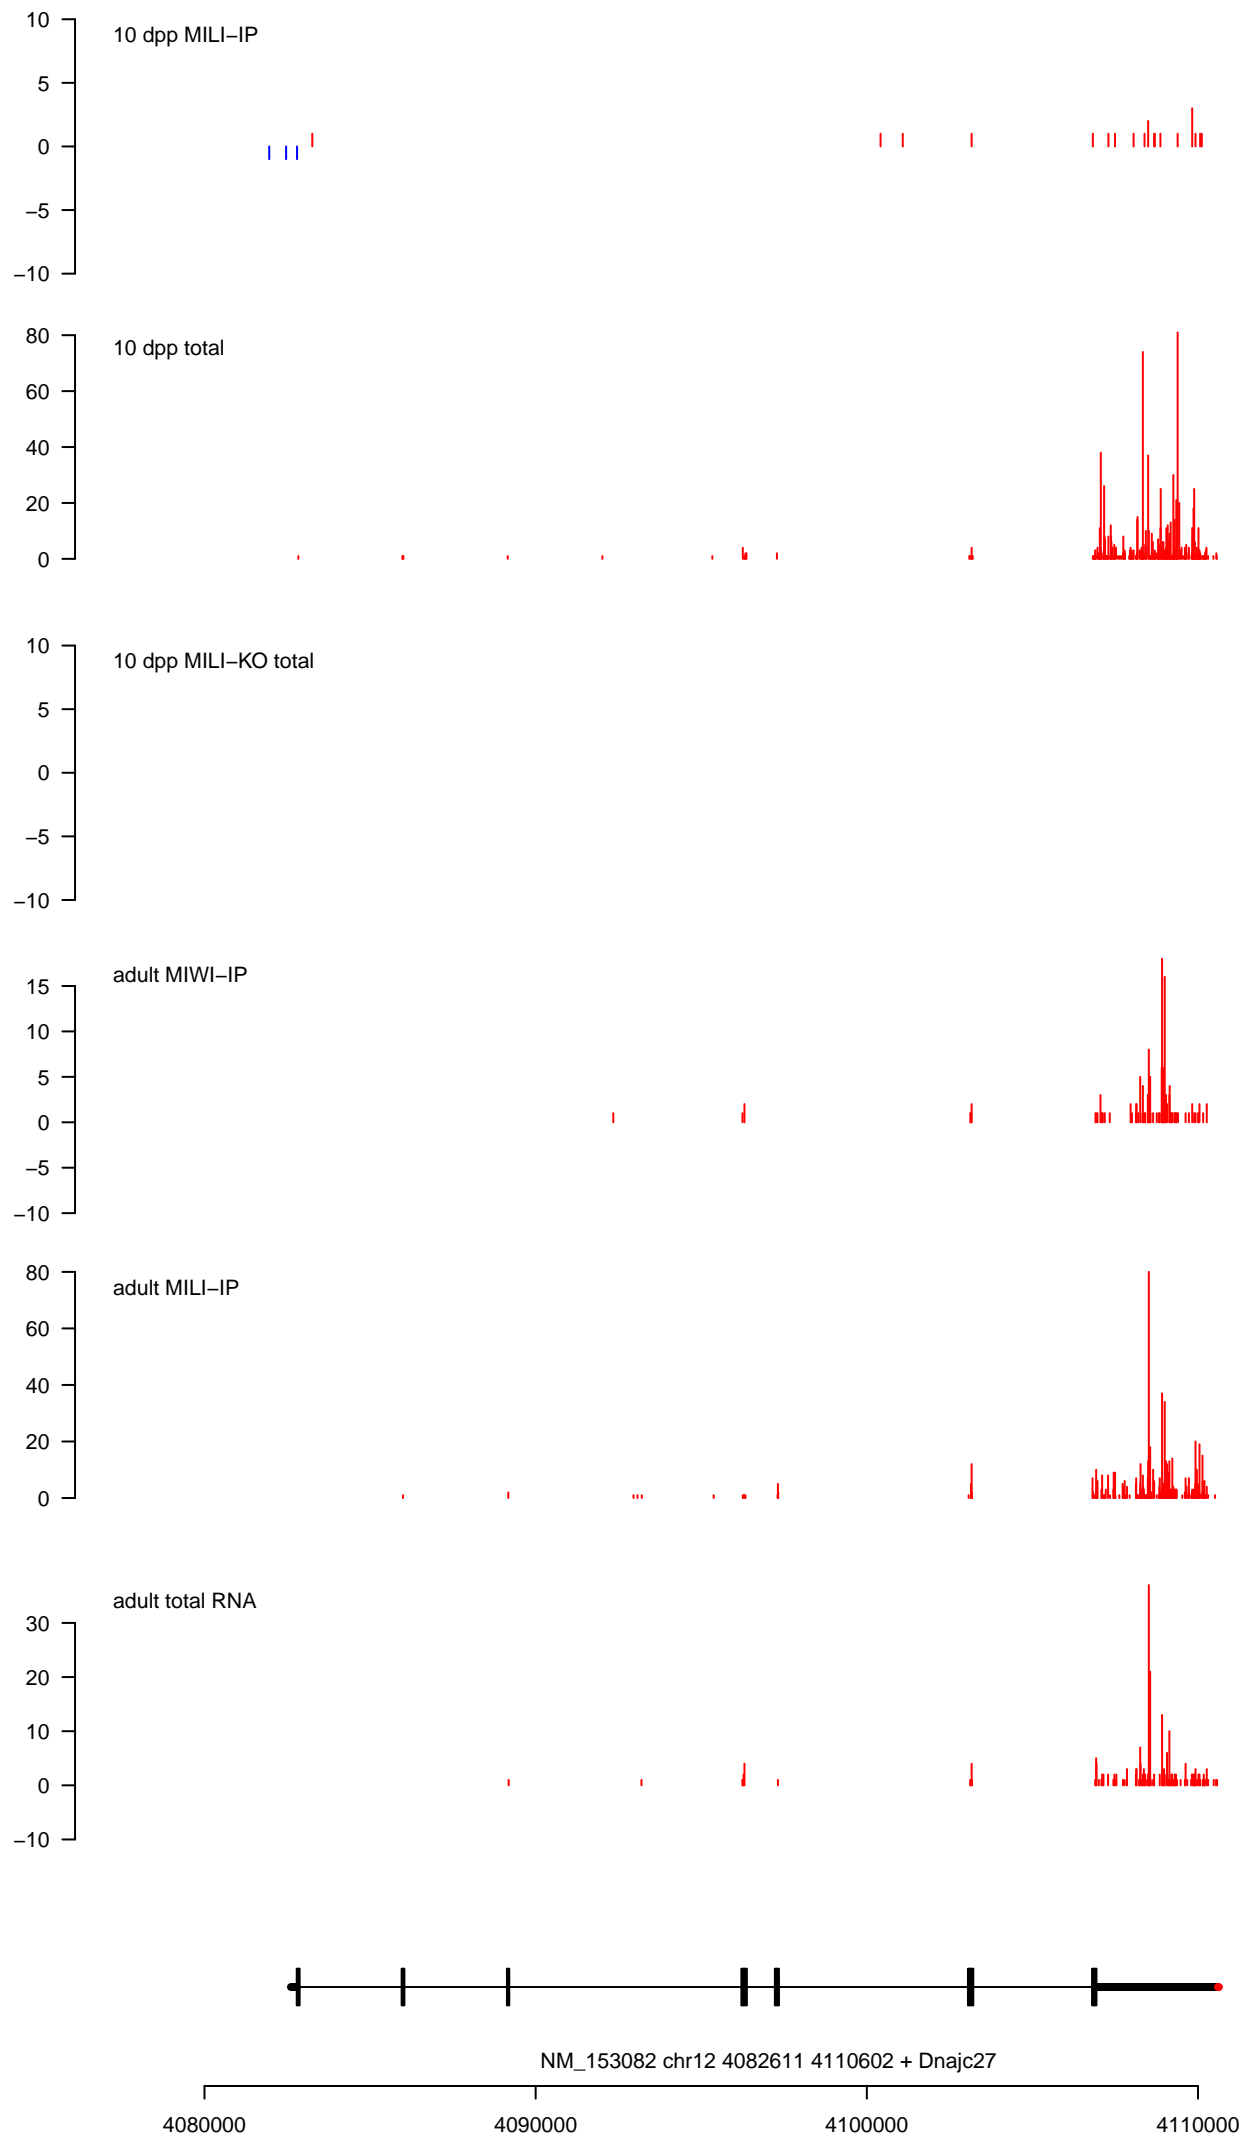

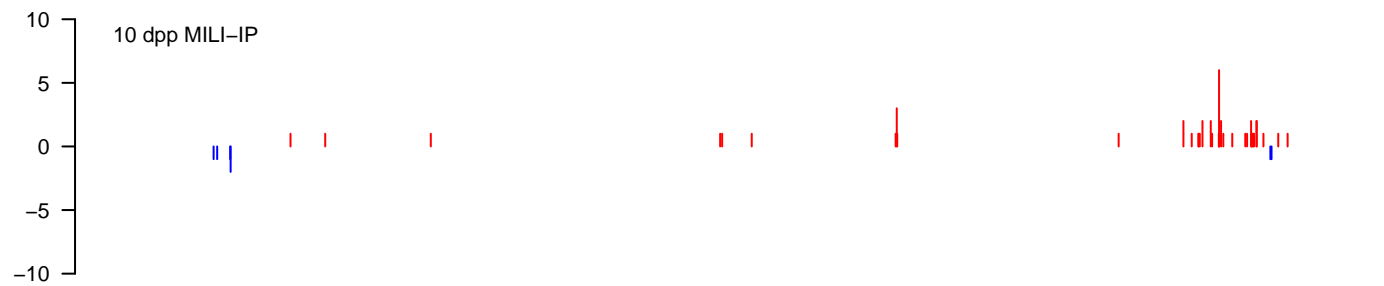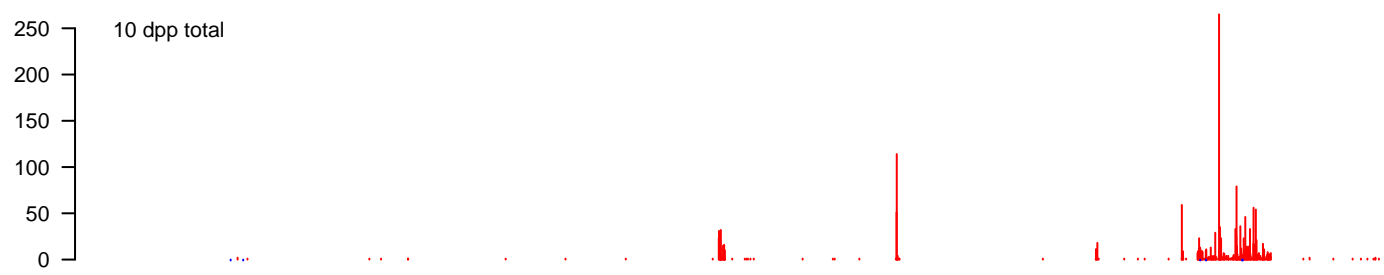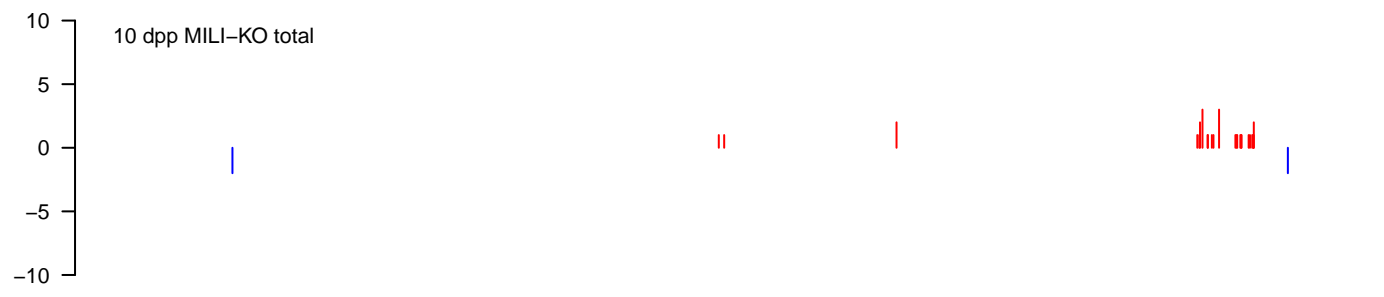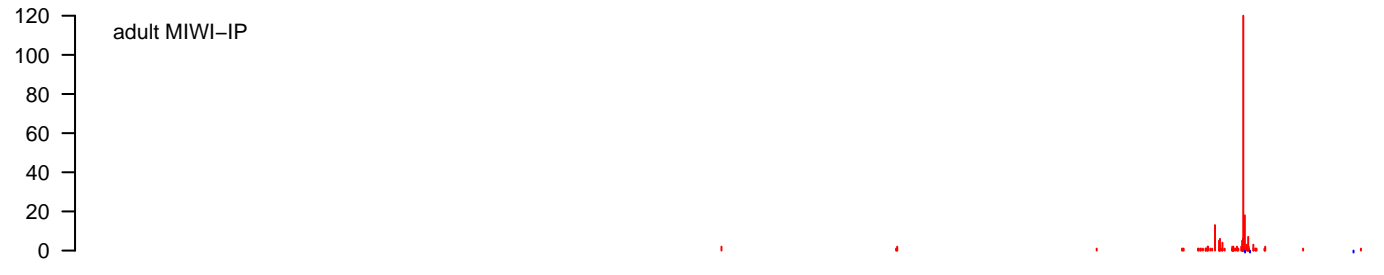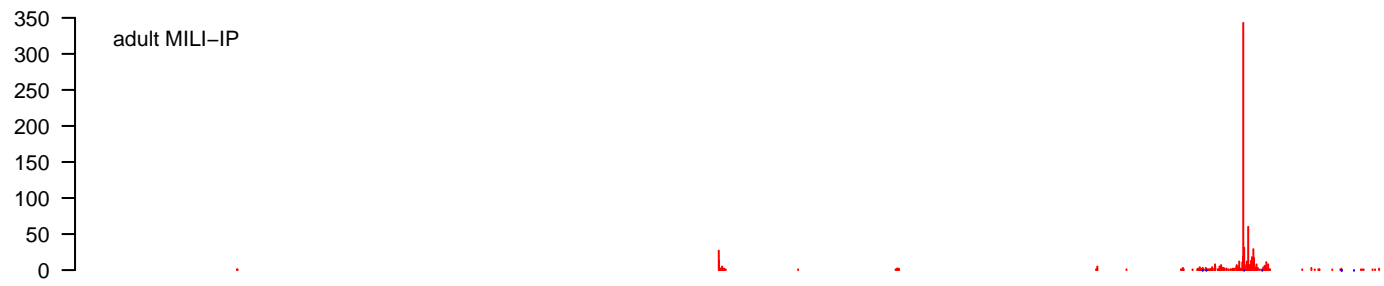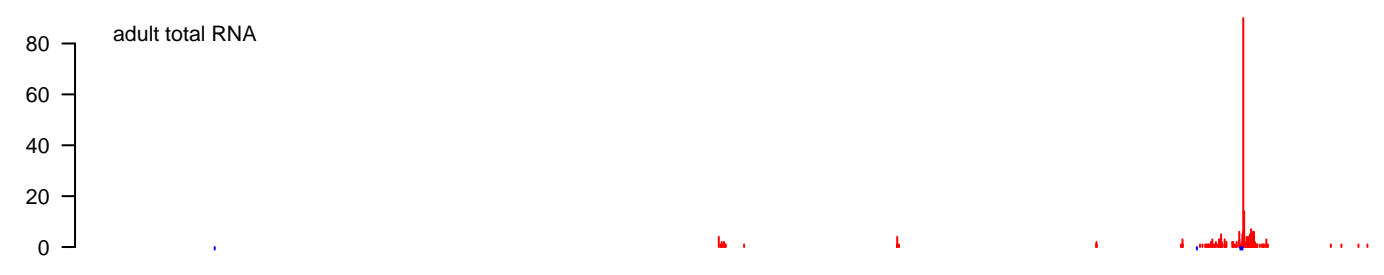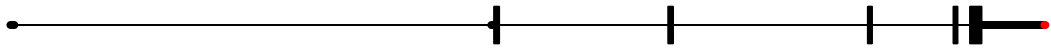

NM\_013785 chr9 107904978 107951113 + Ip6k1

107900000 107910000 107920000 107930000 107940000 107950000

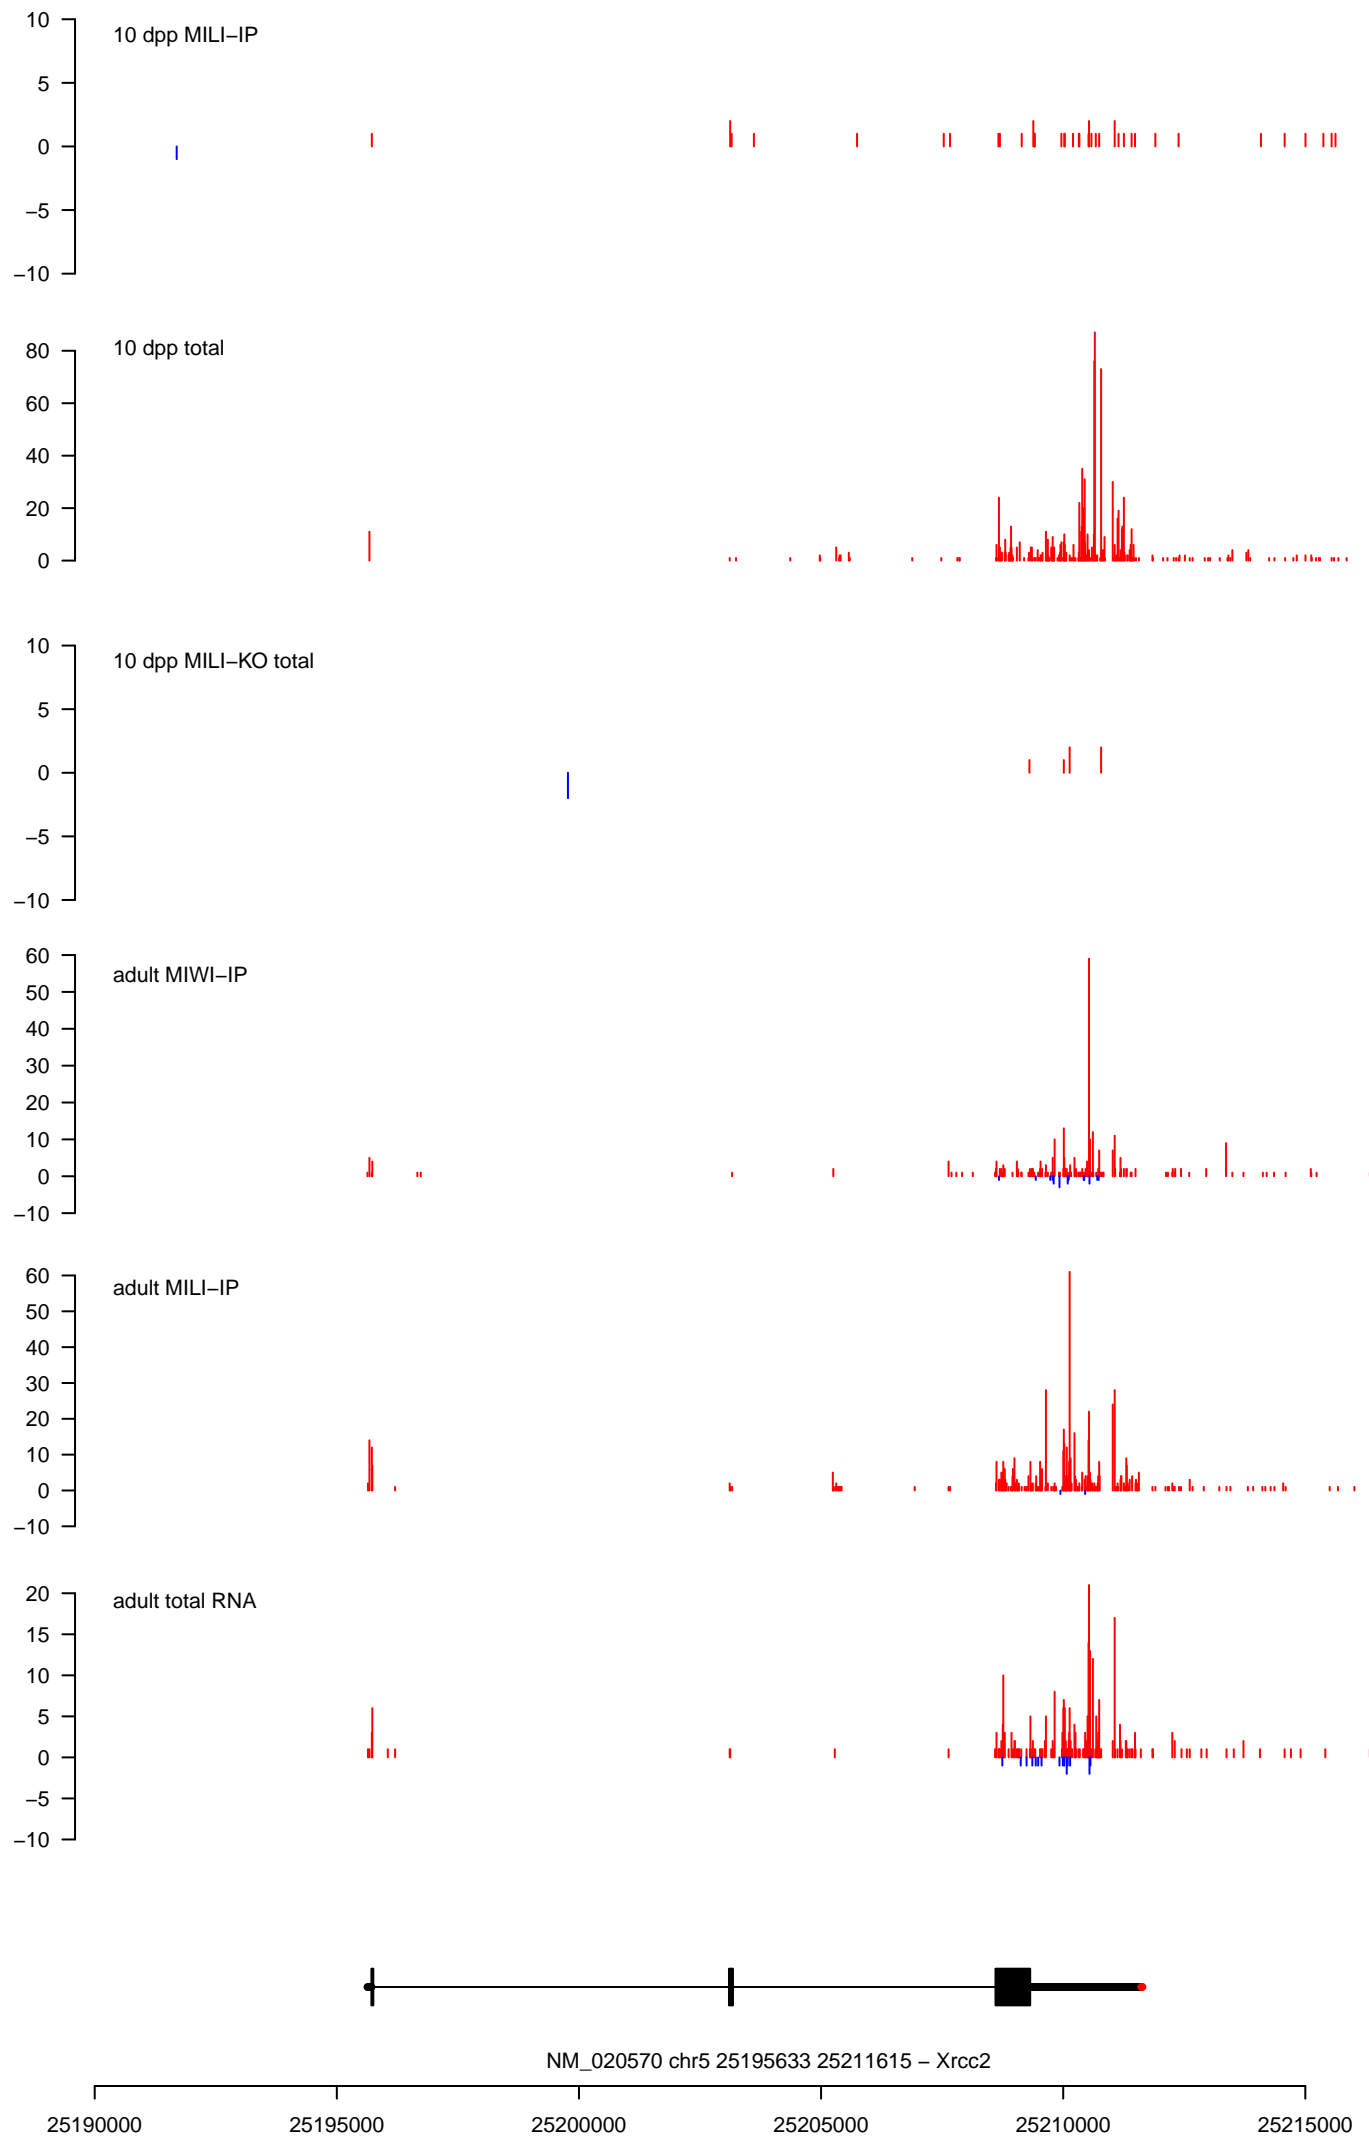

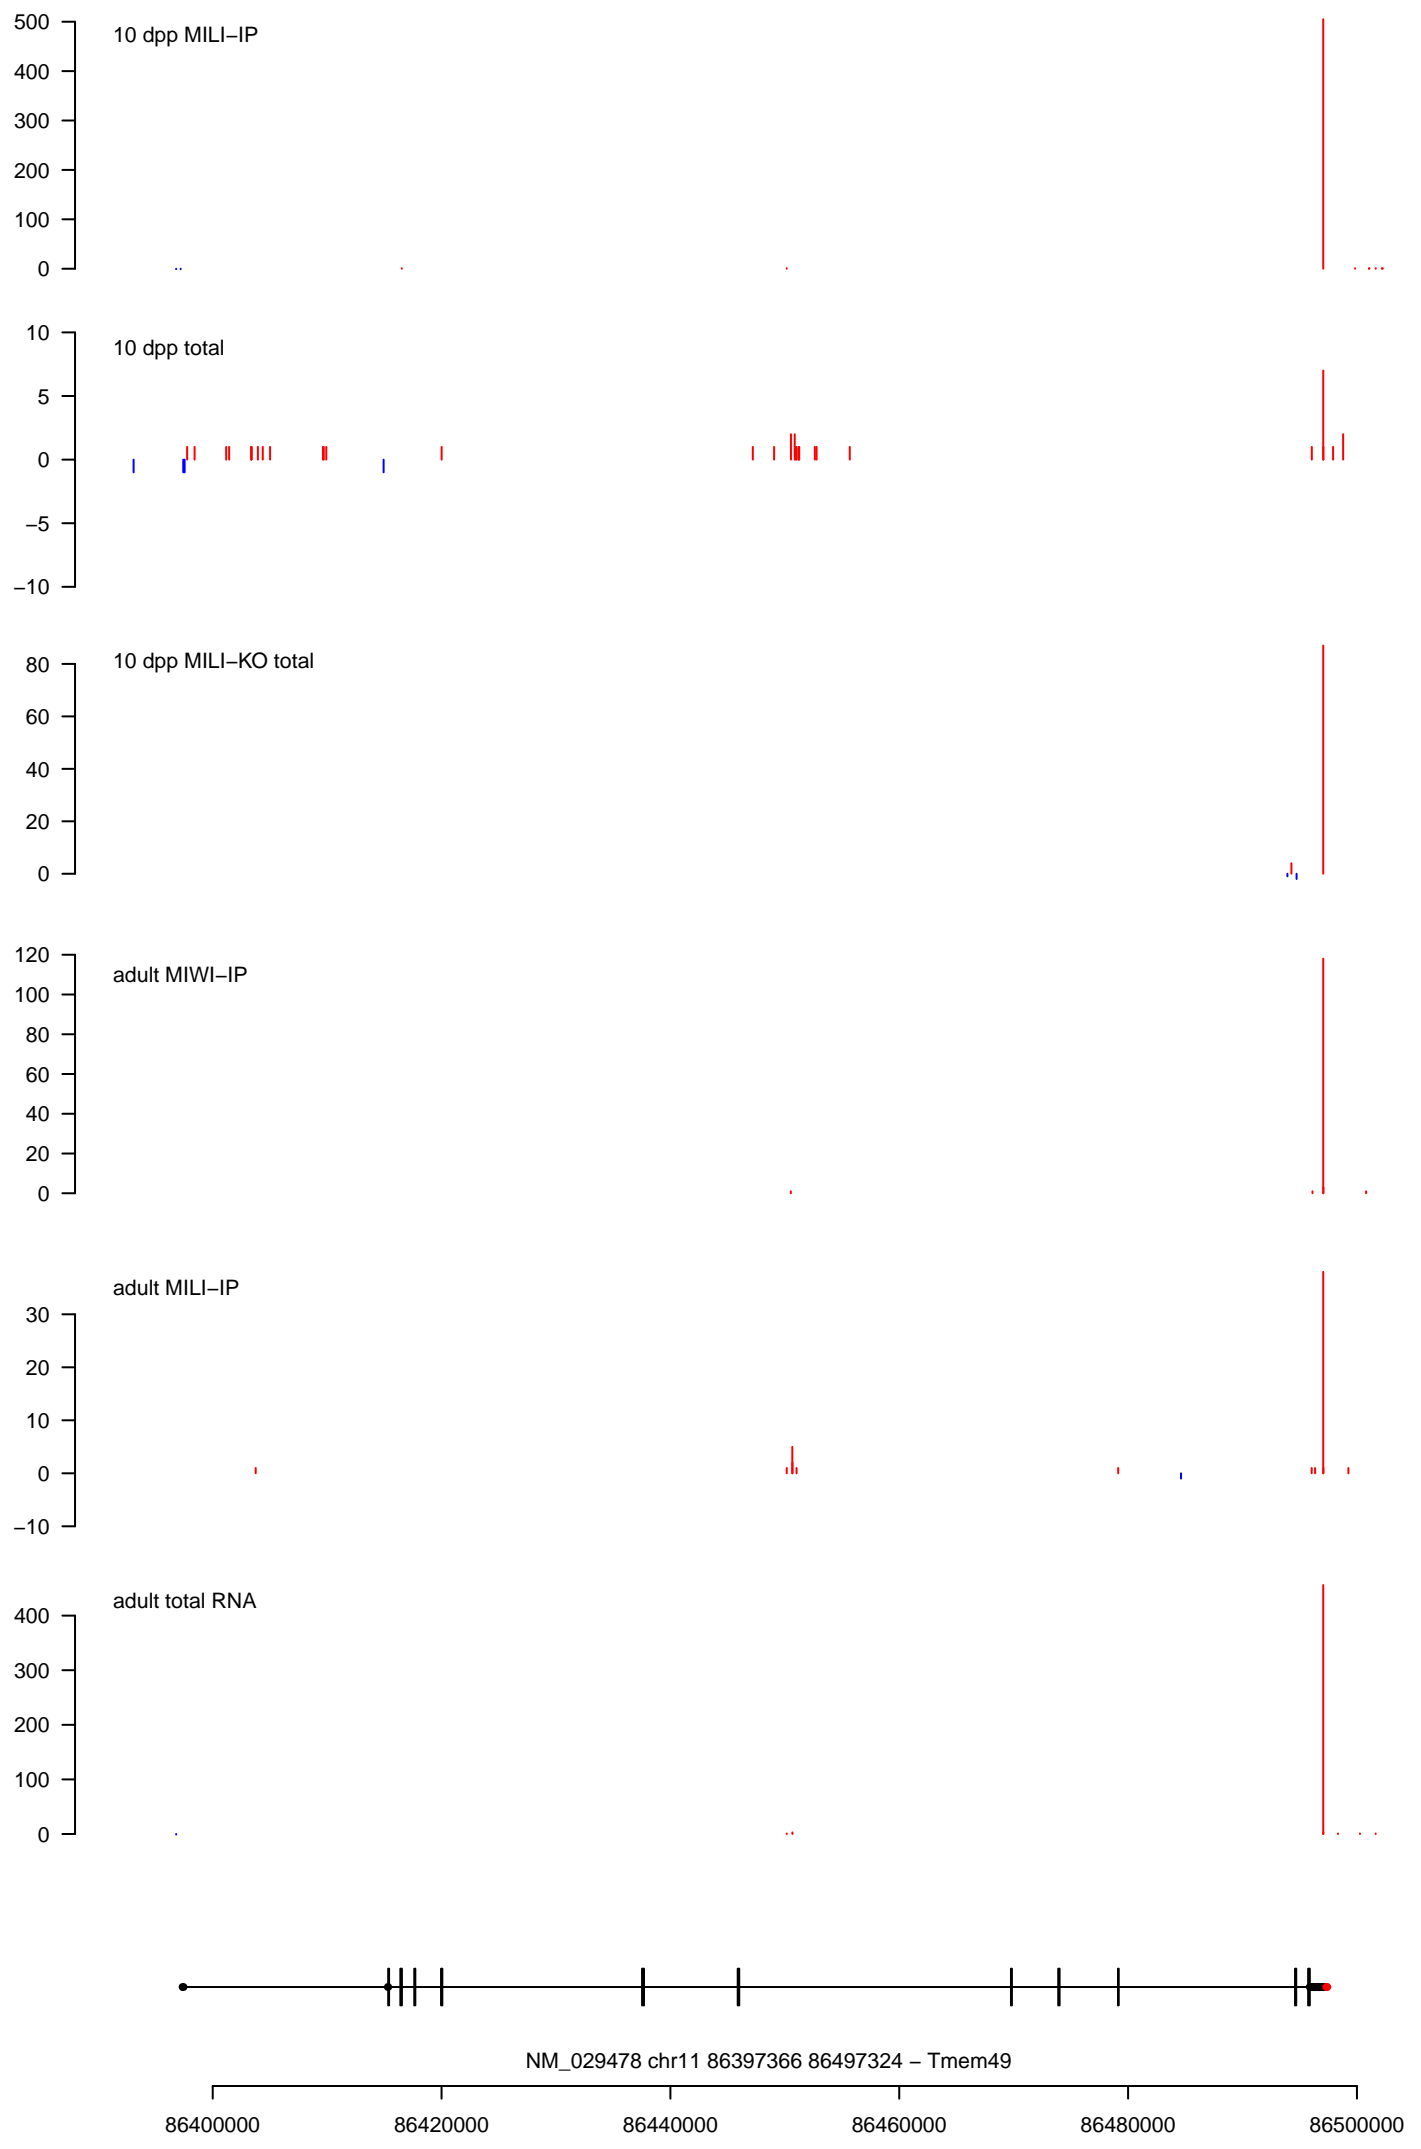

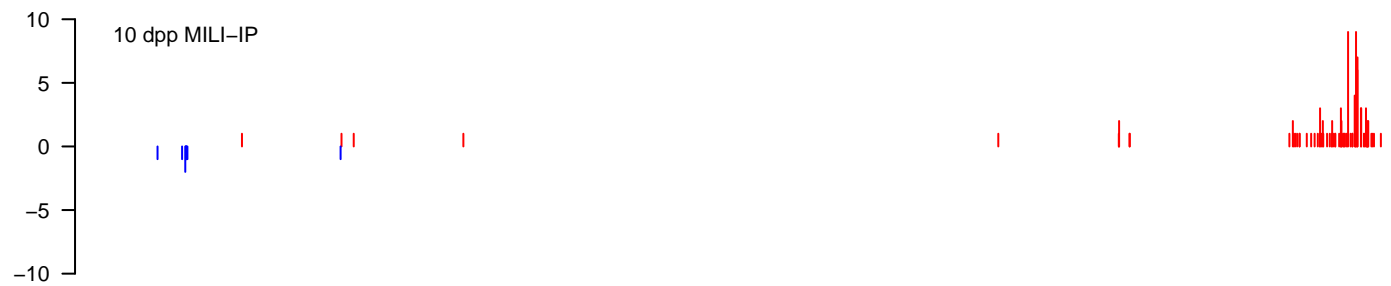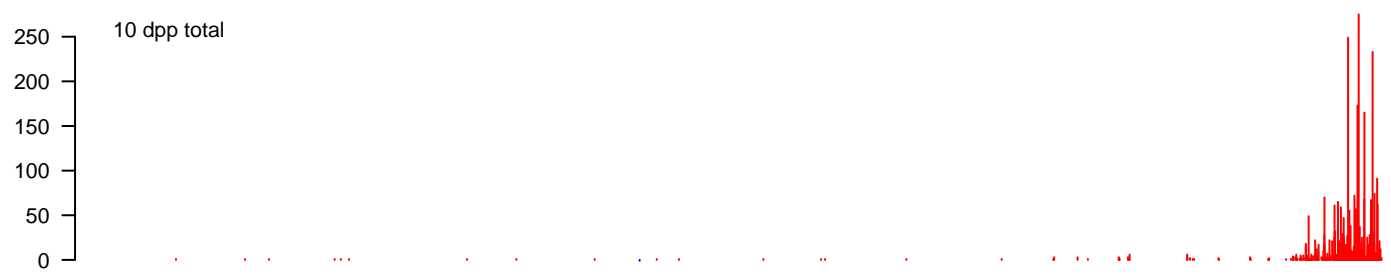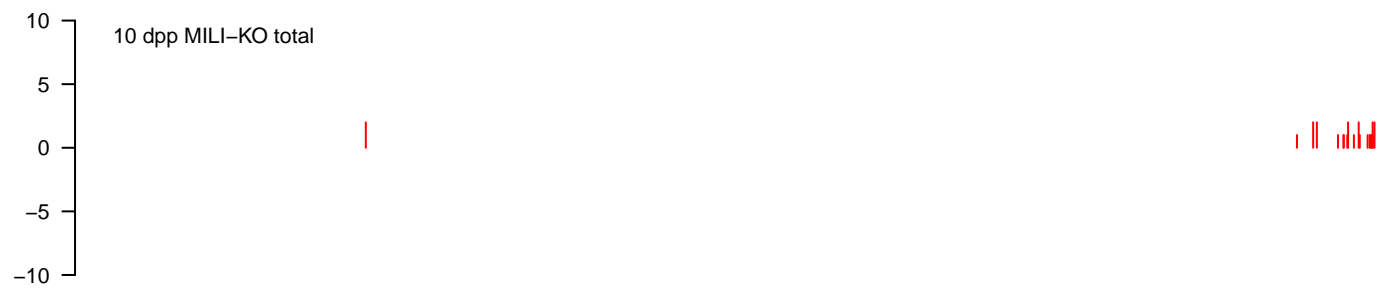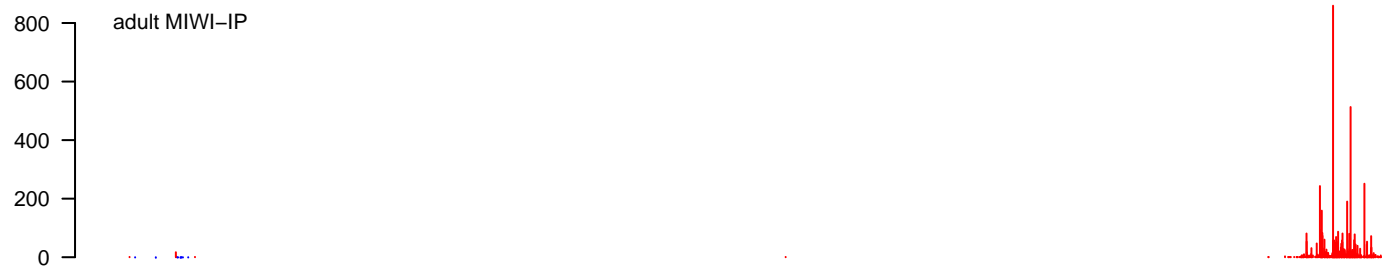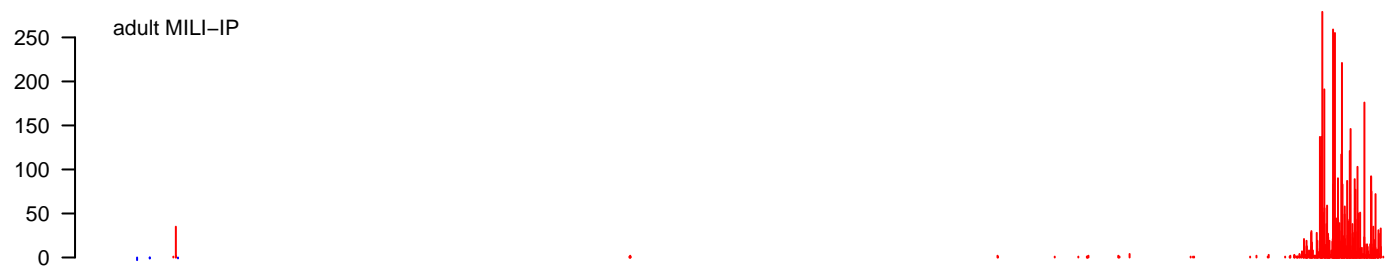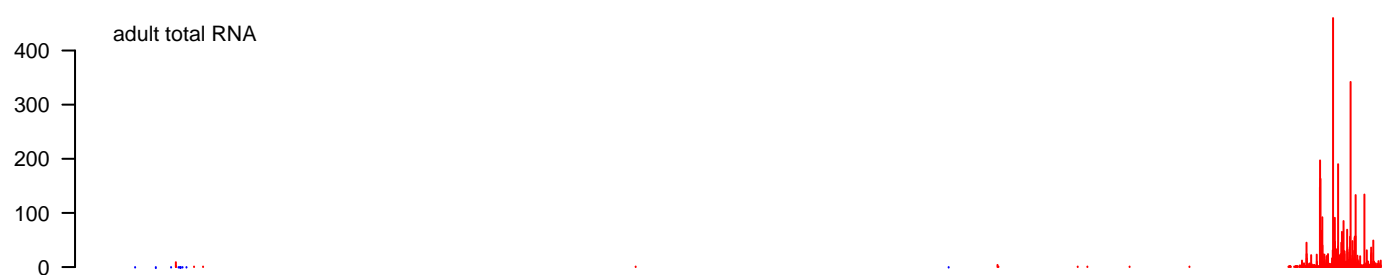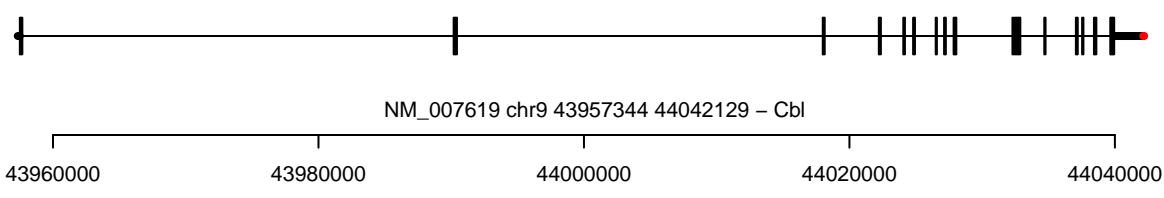

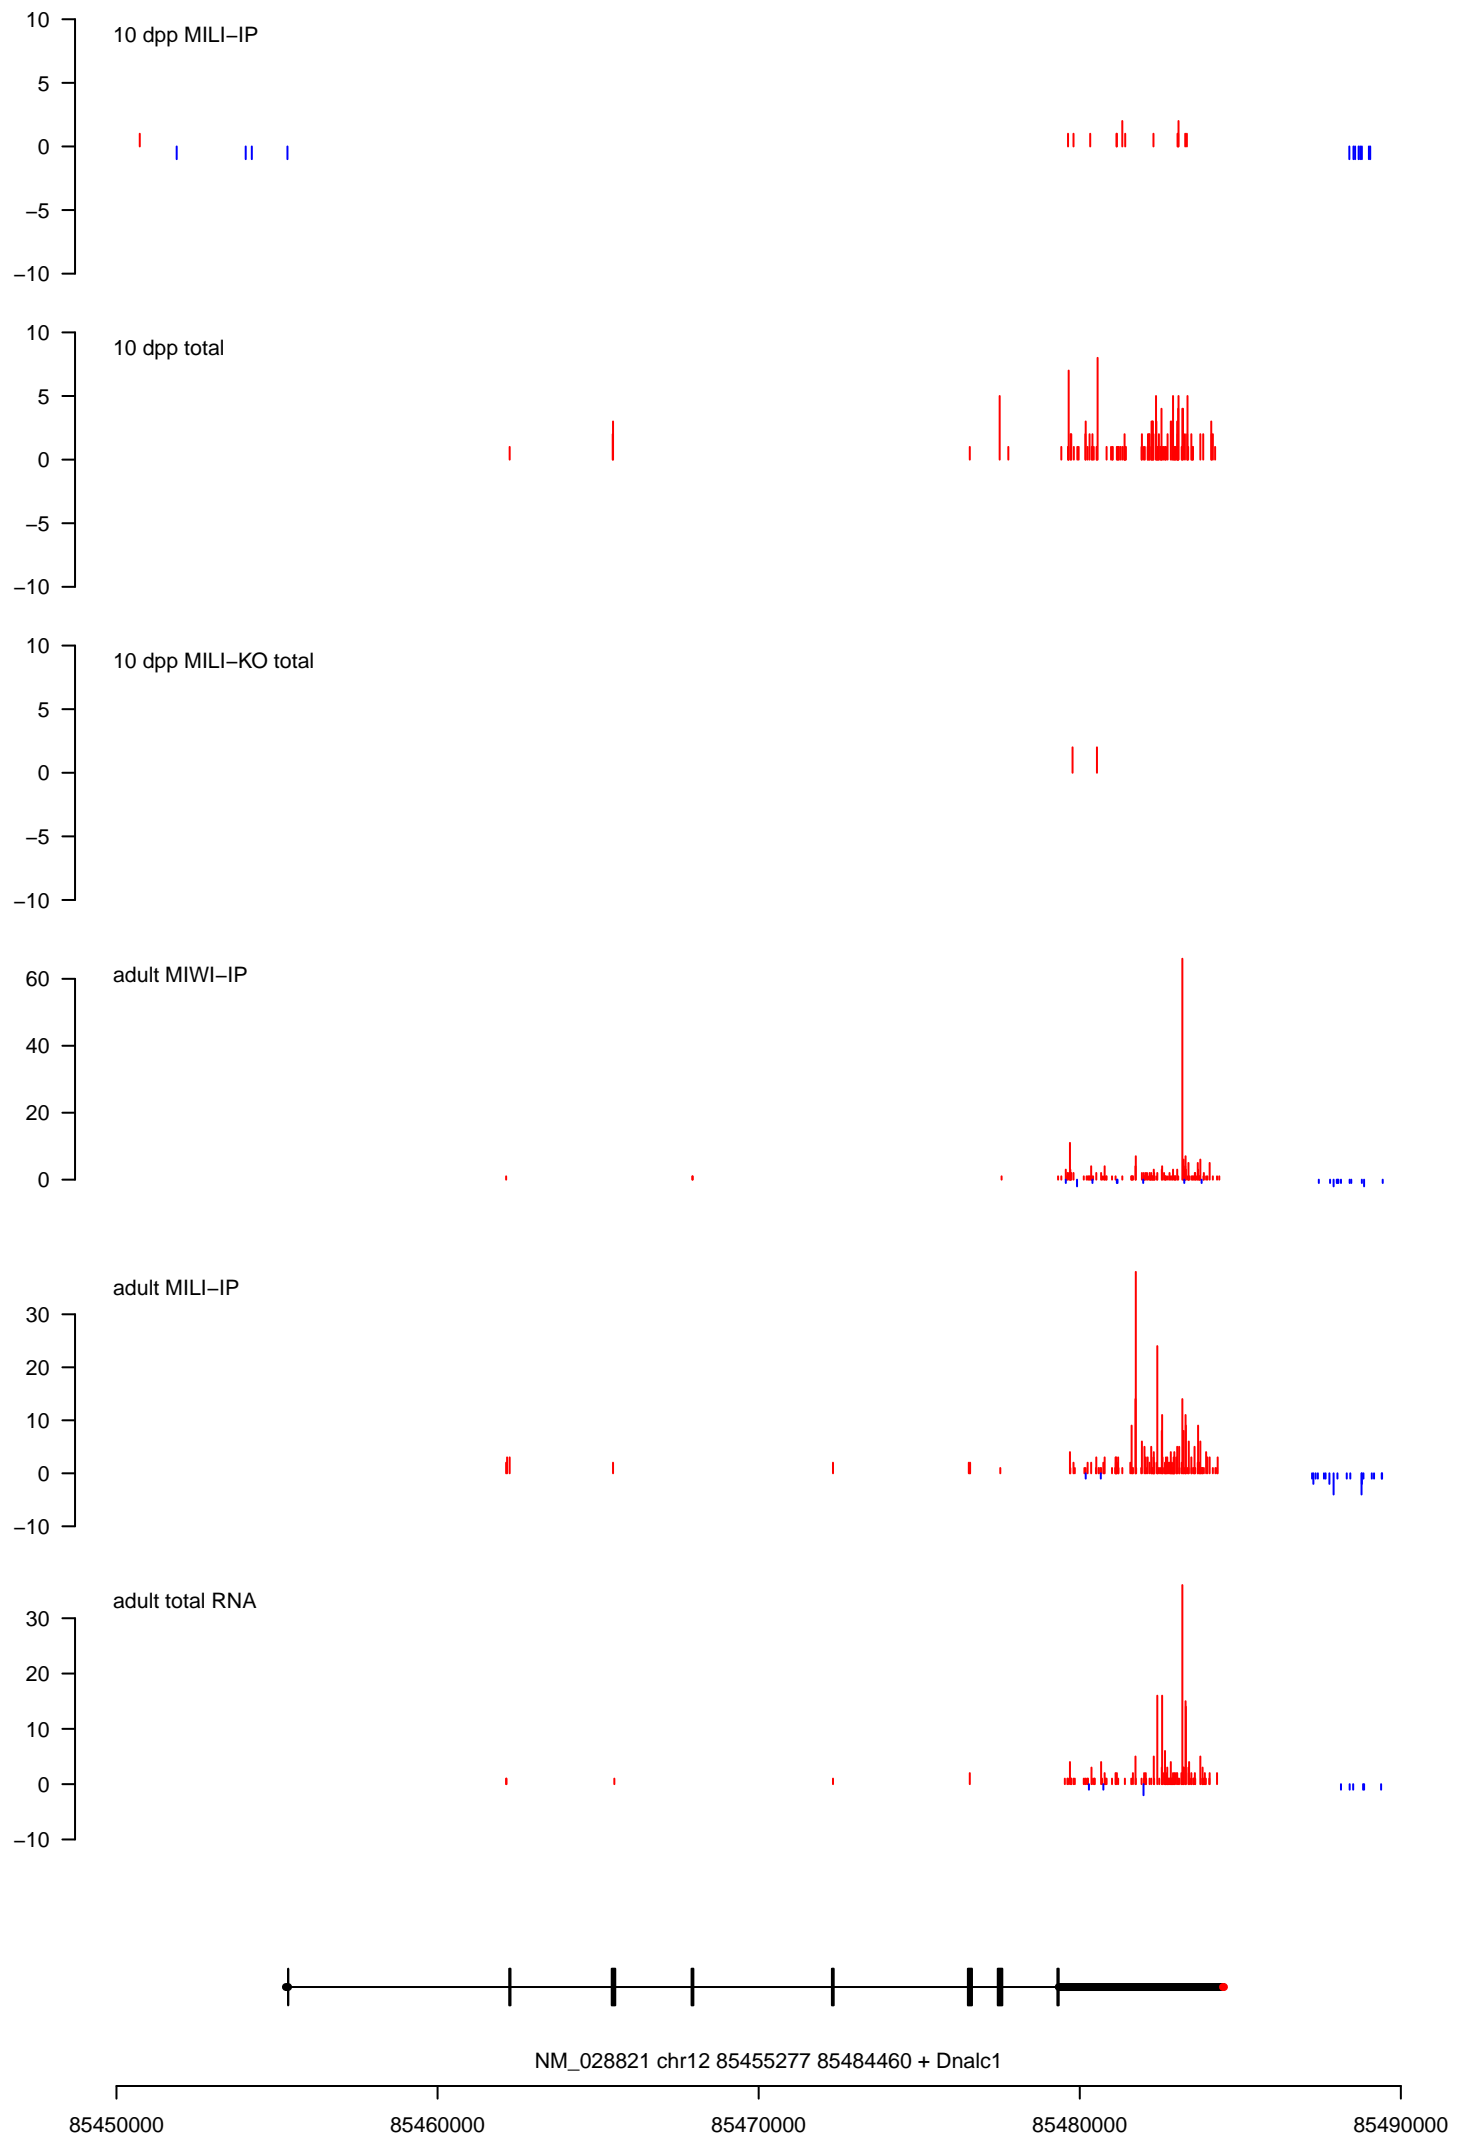

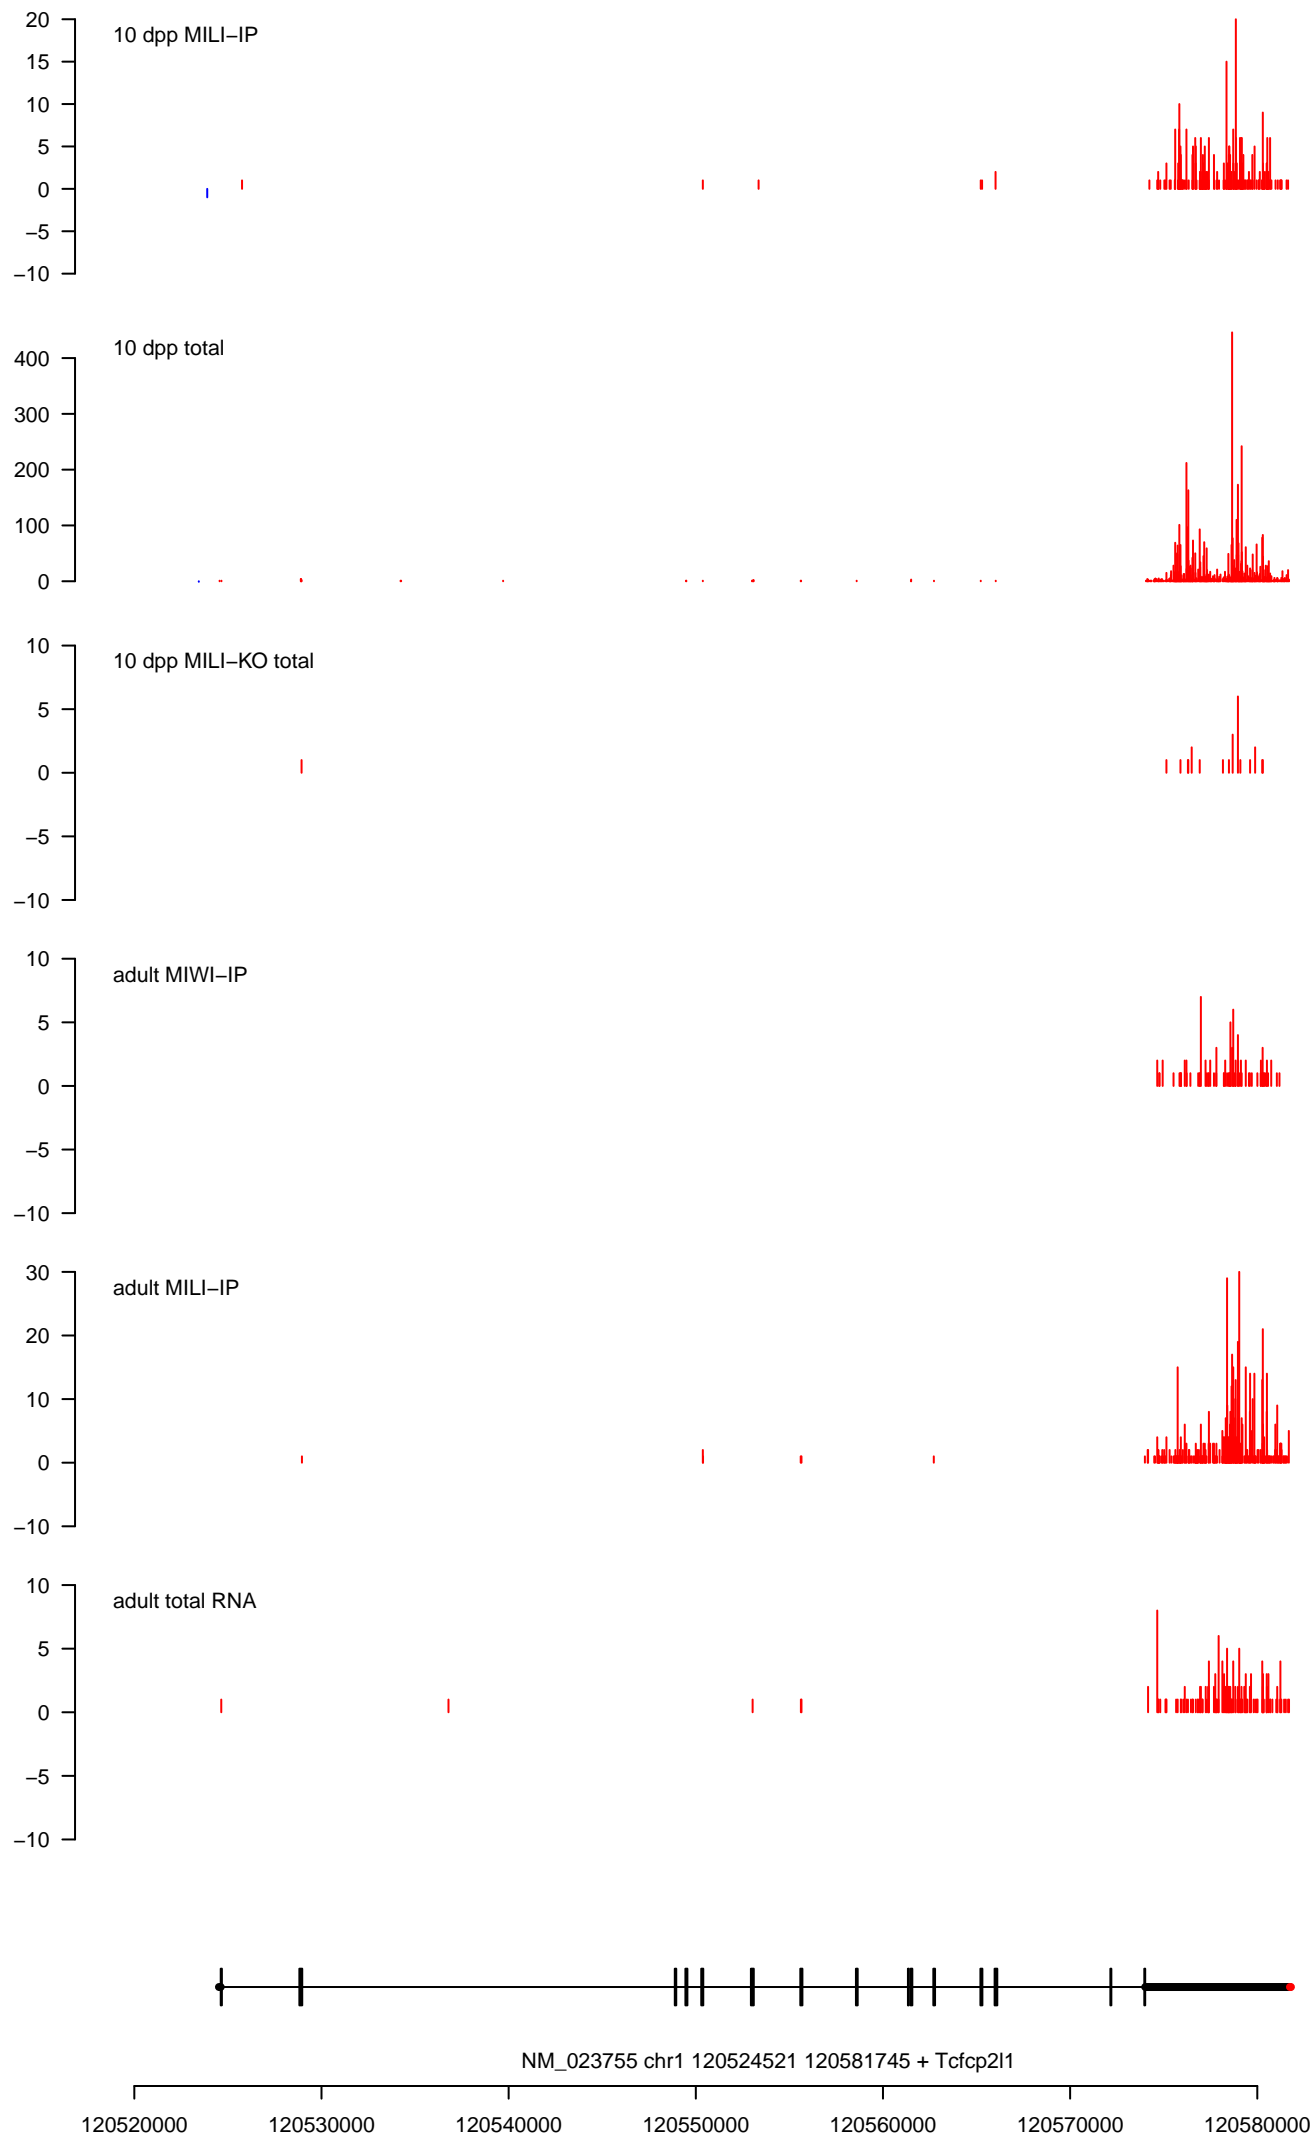



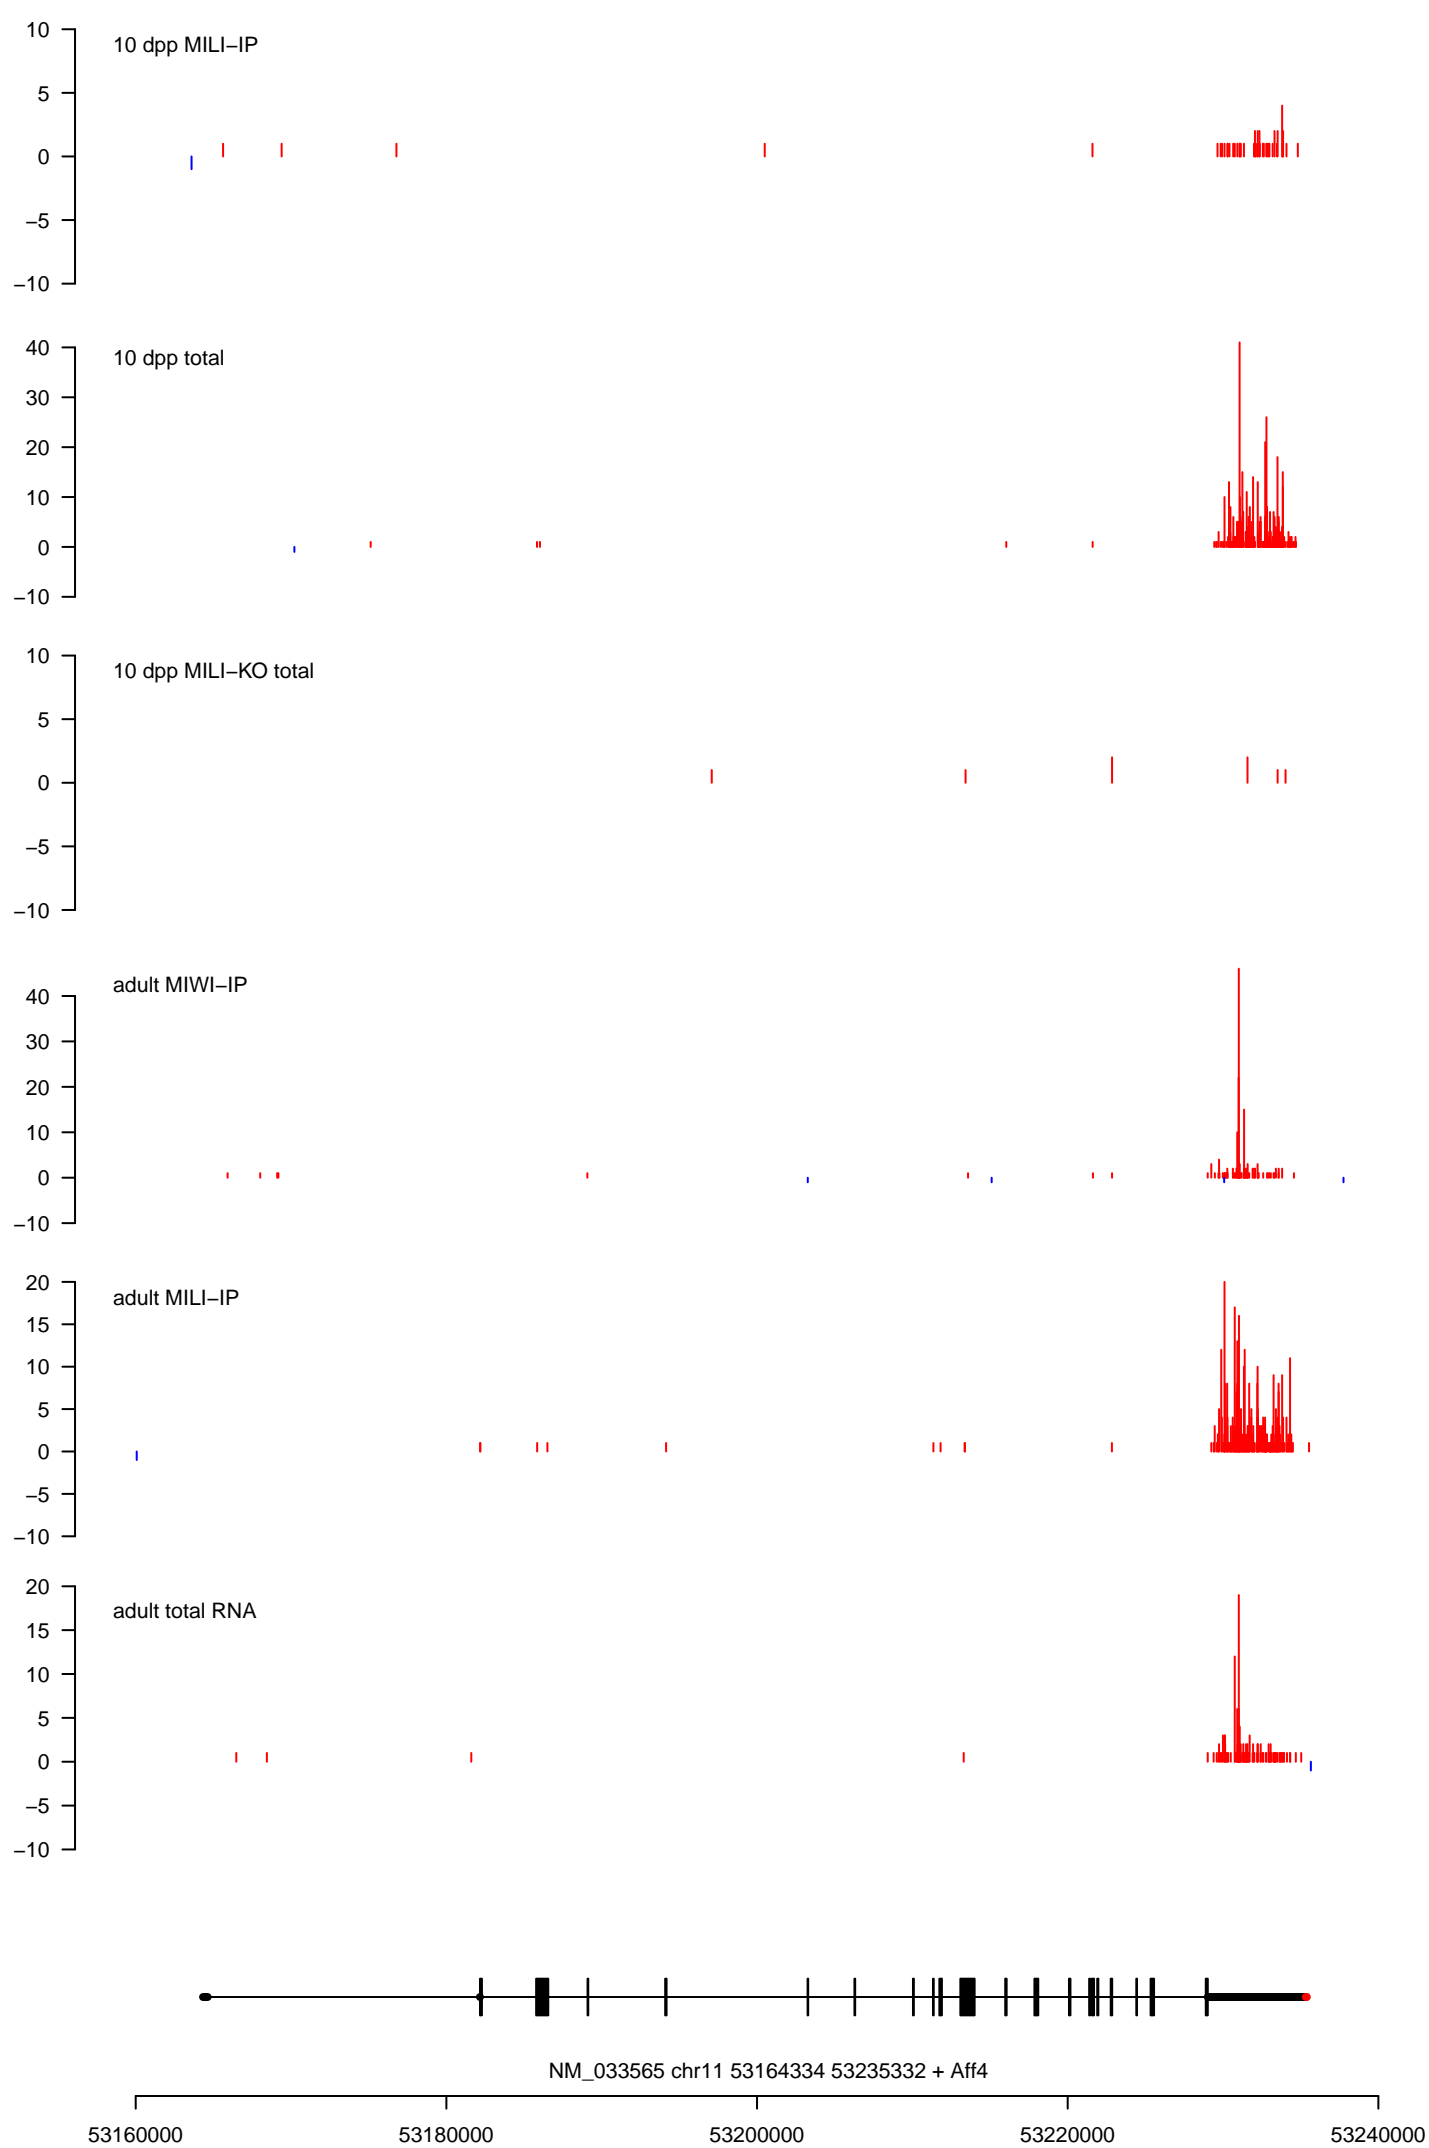

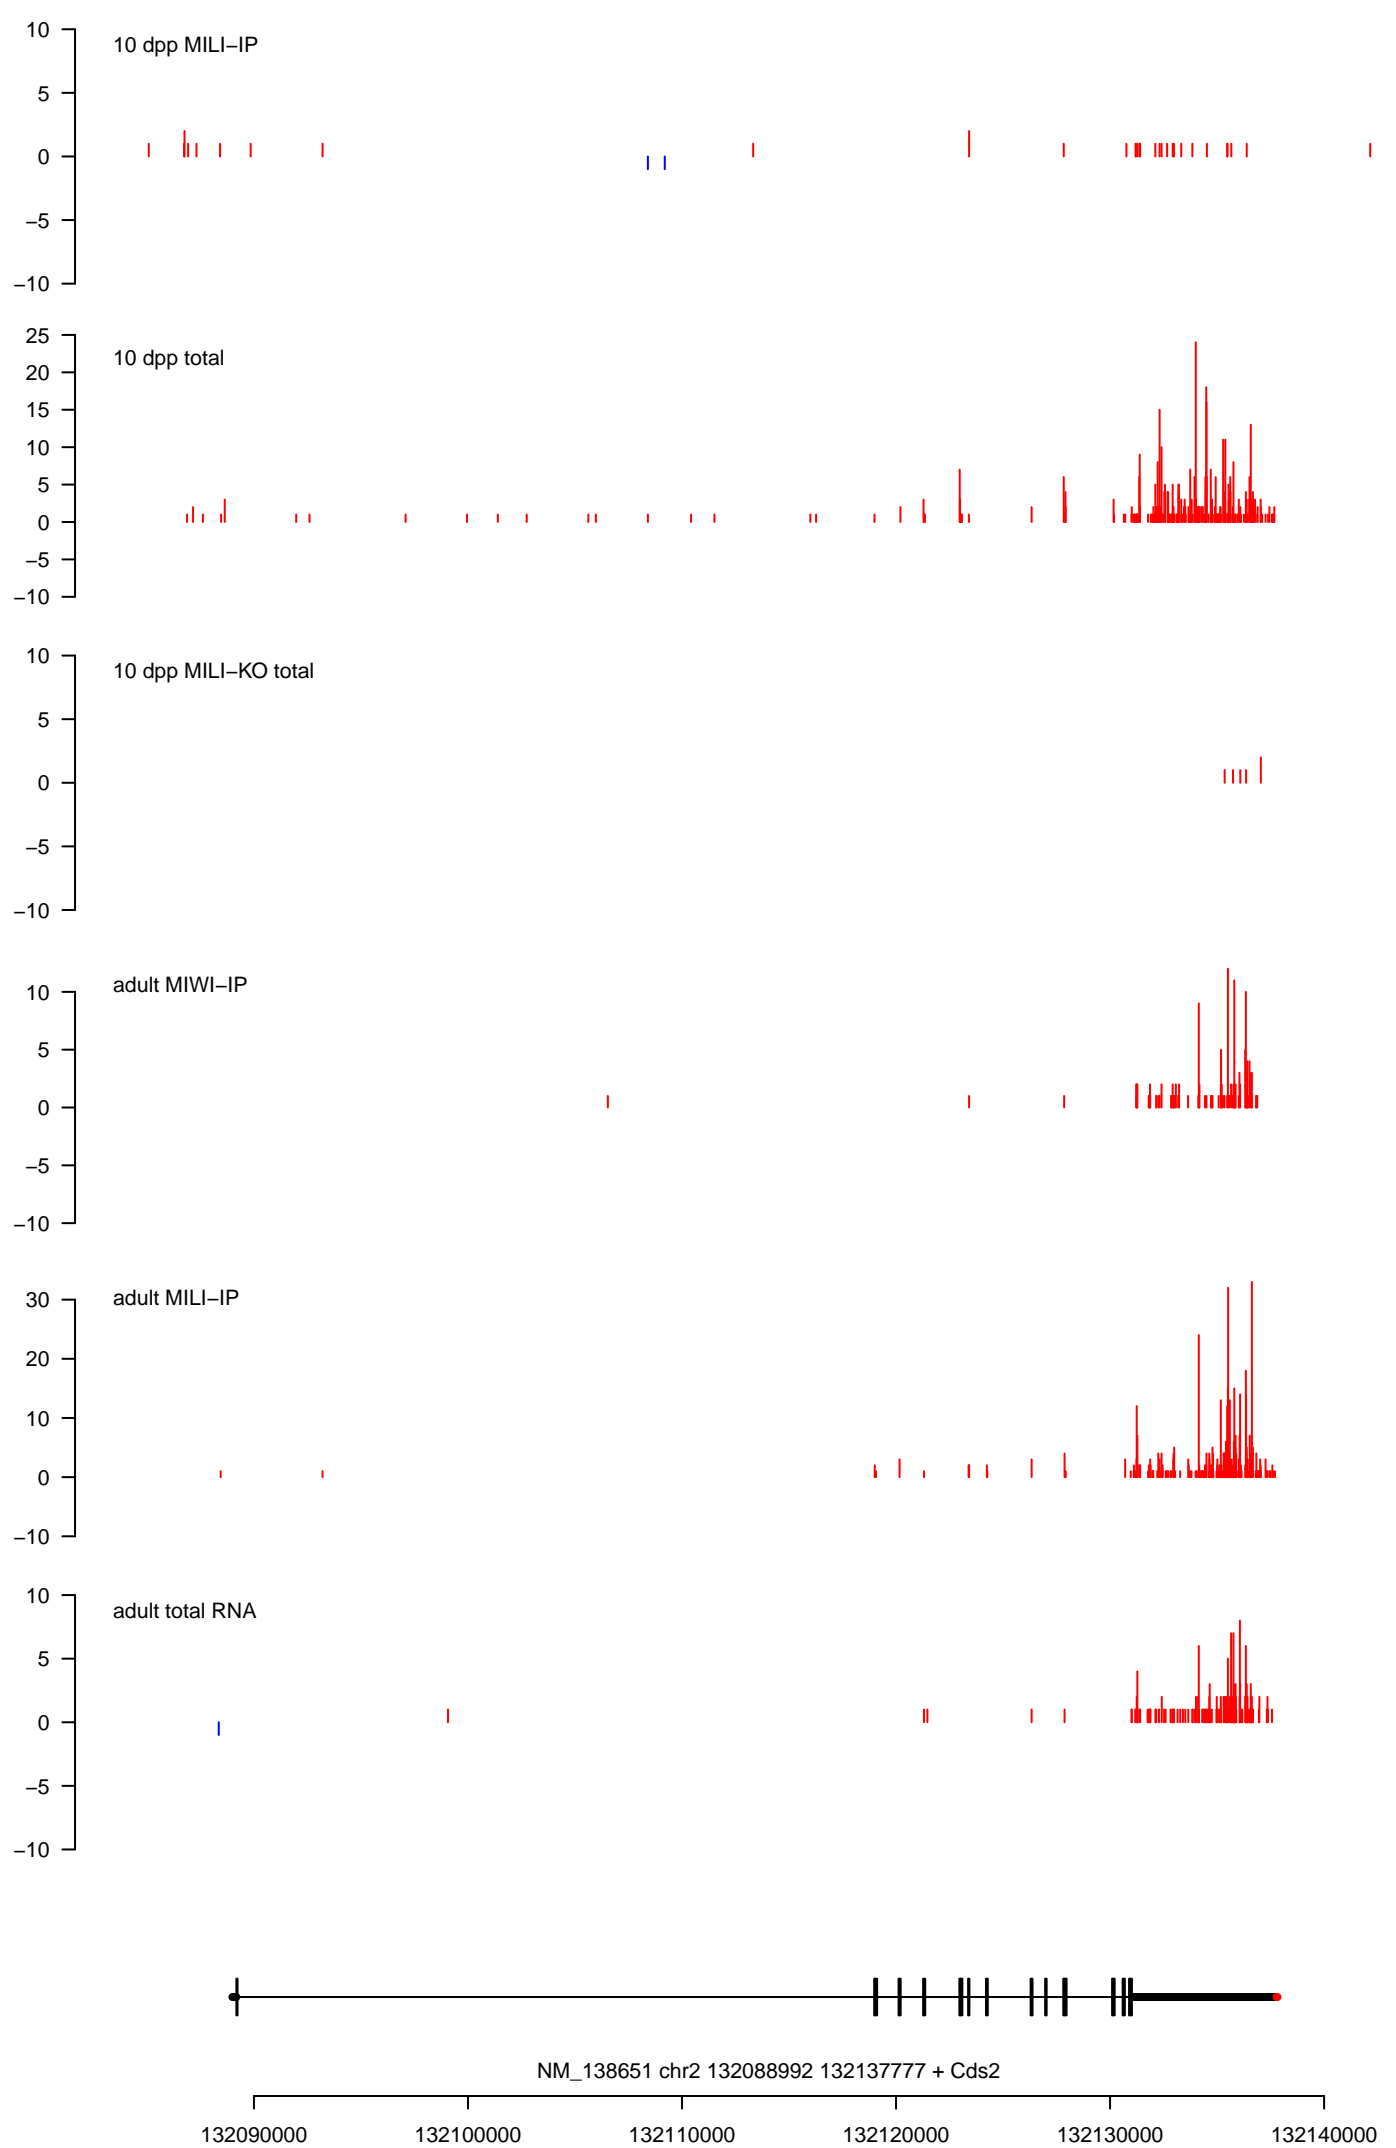

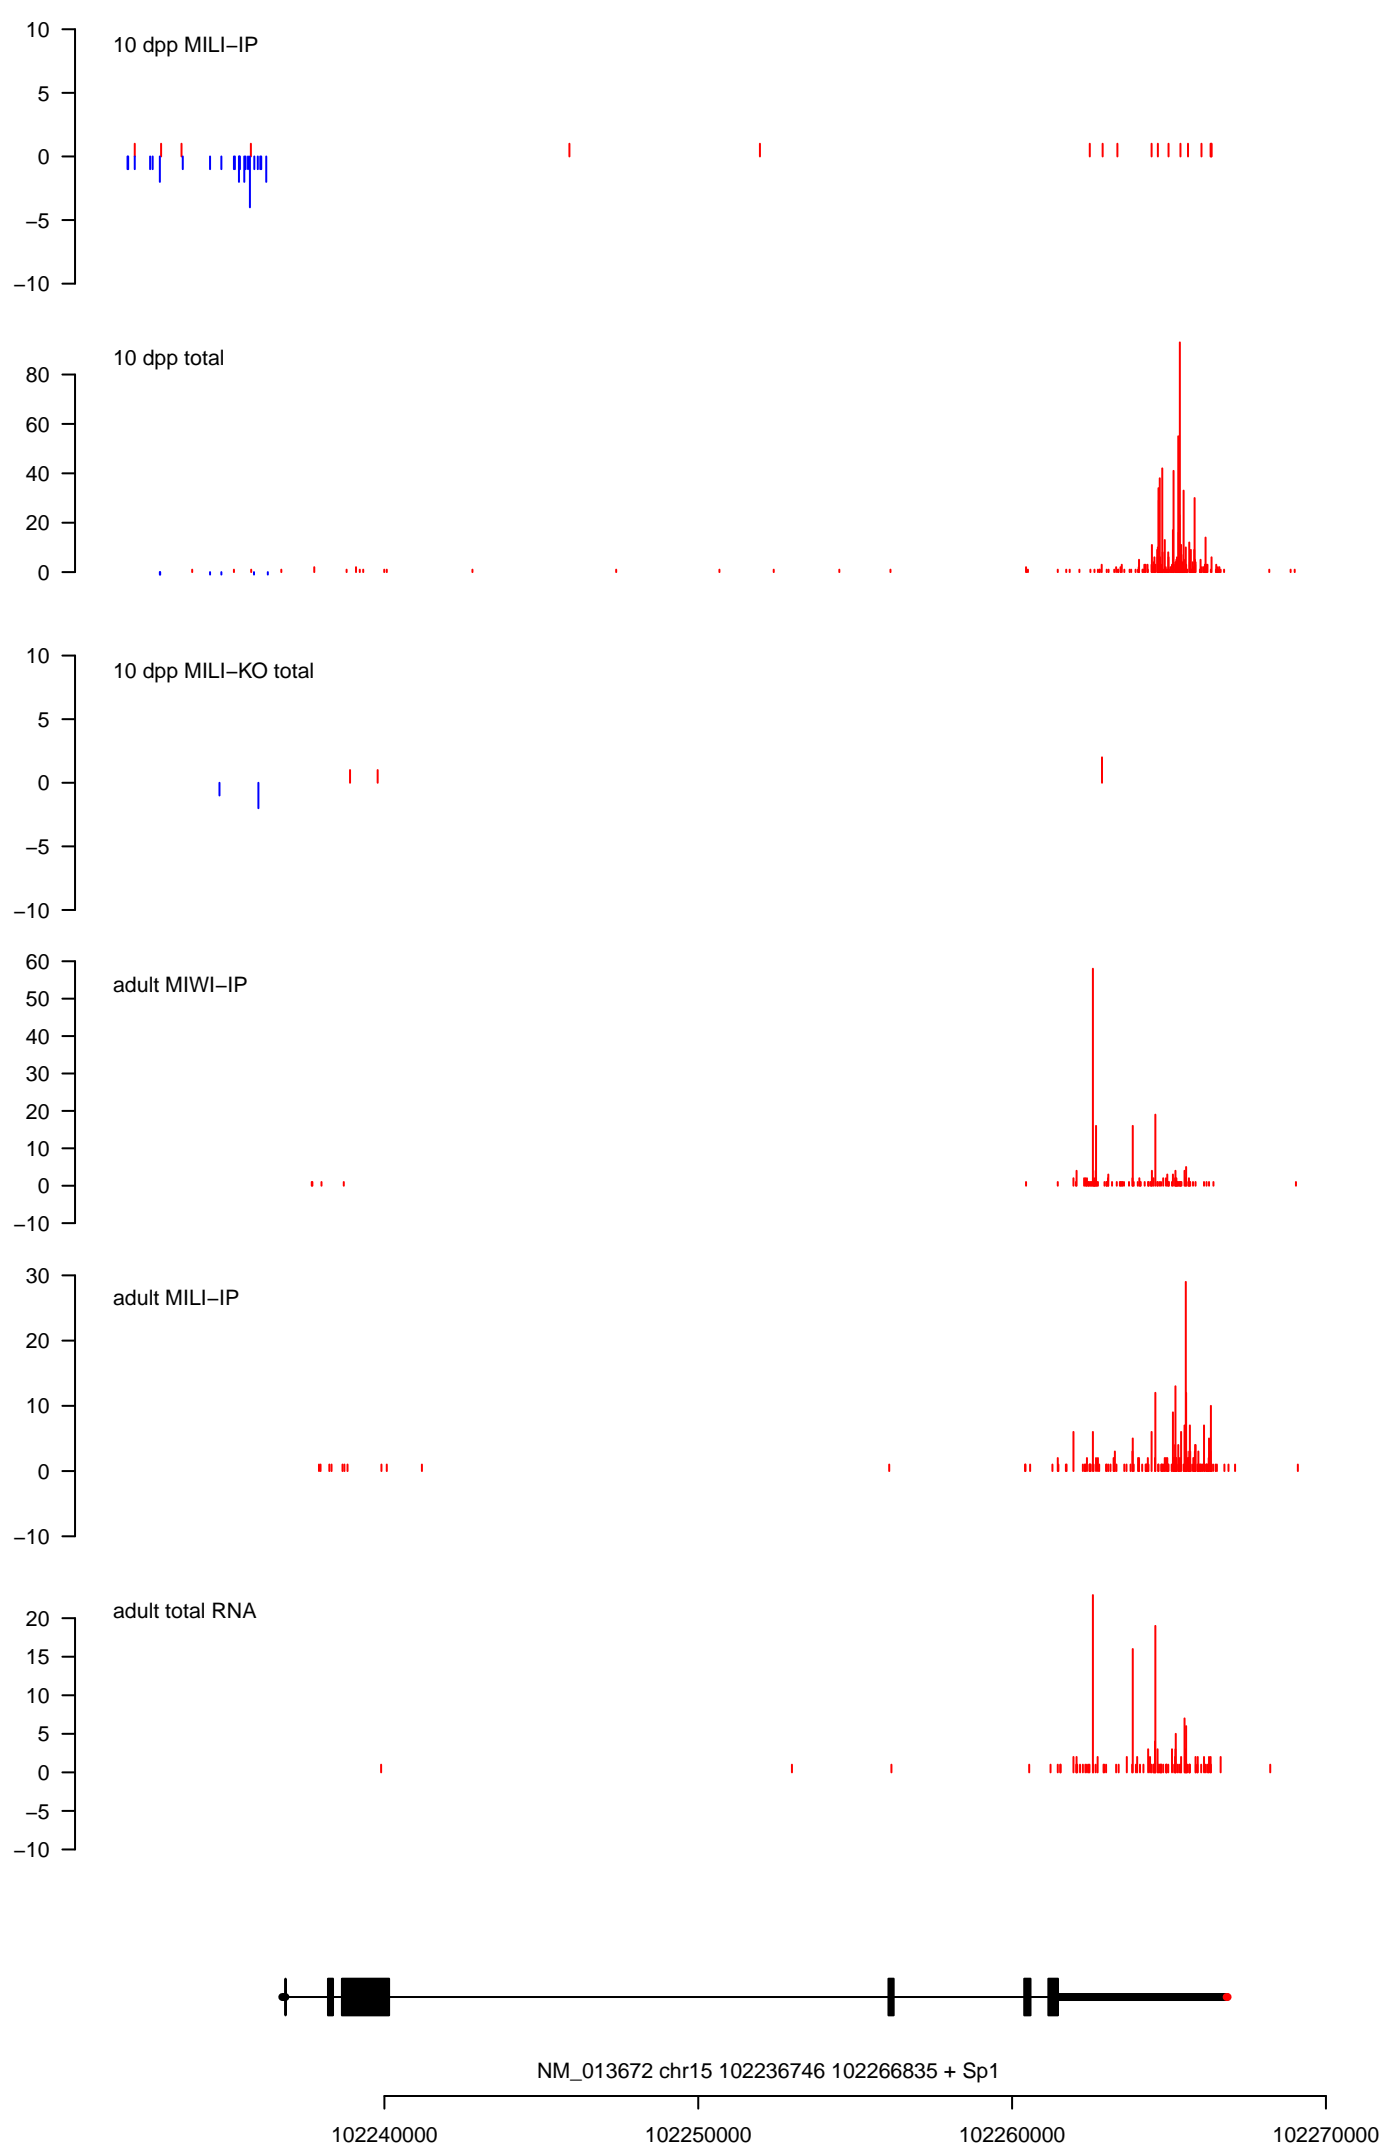

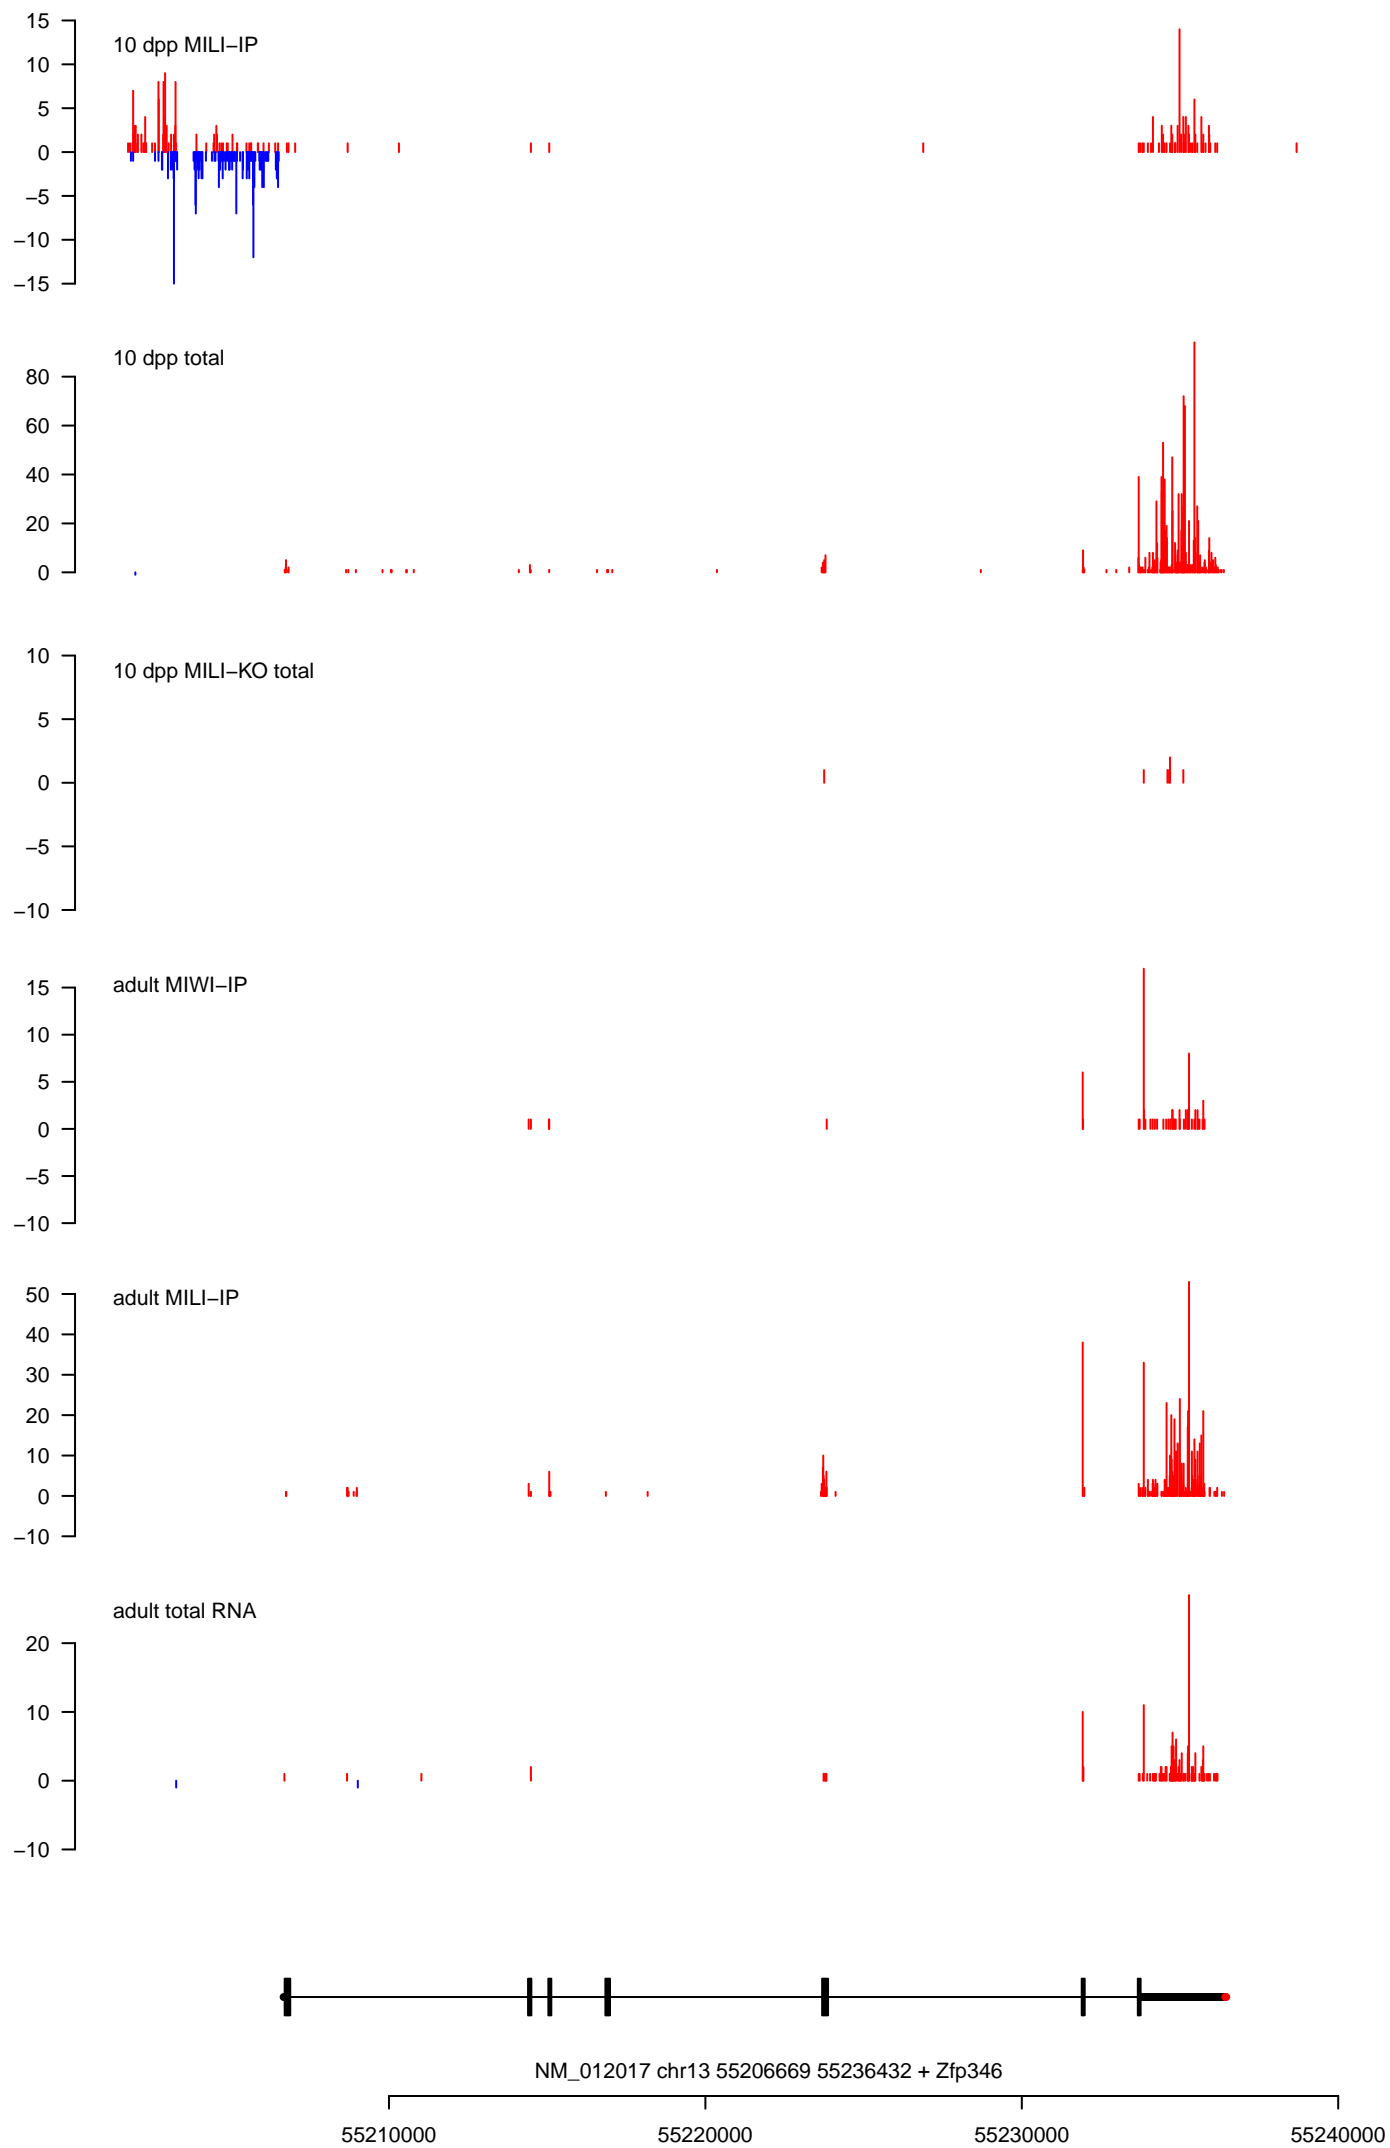



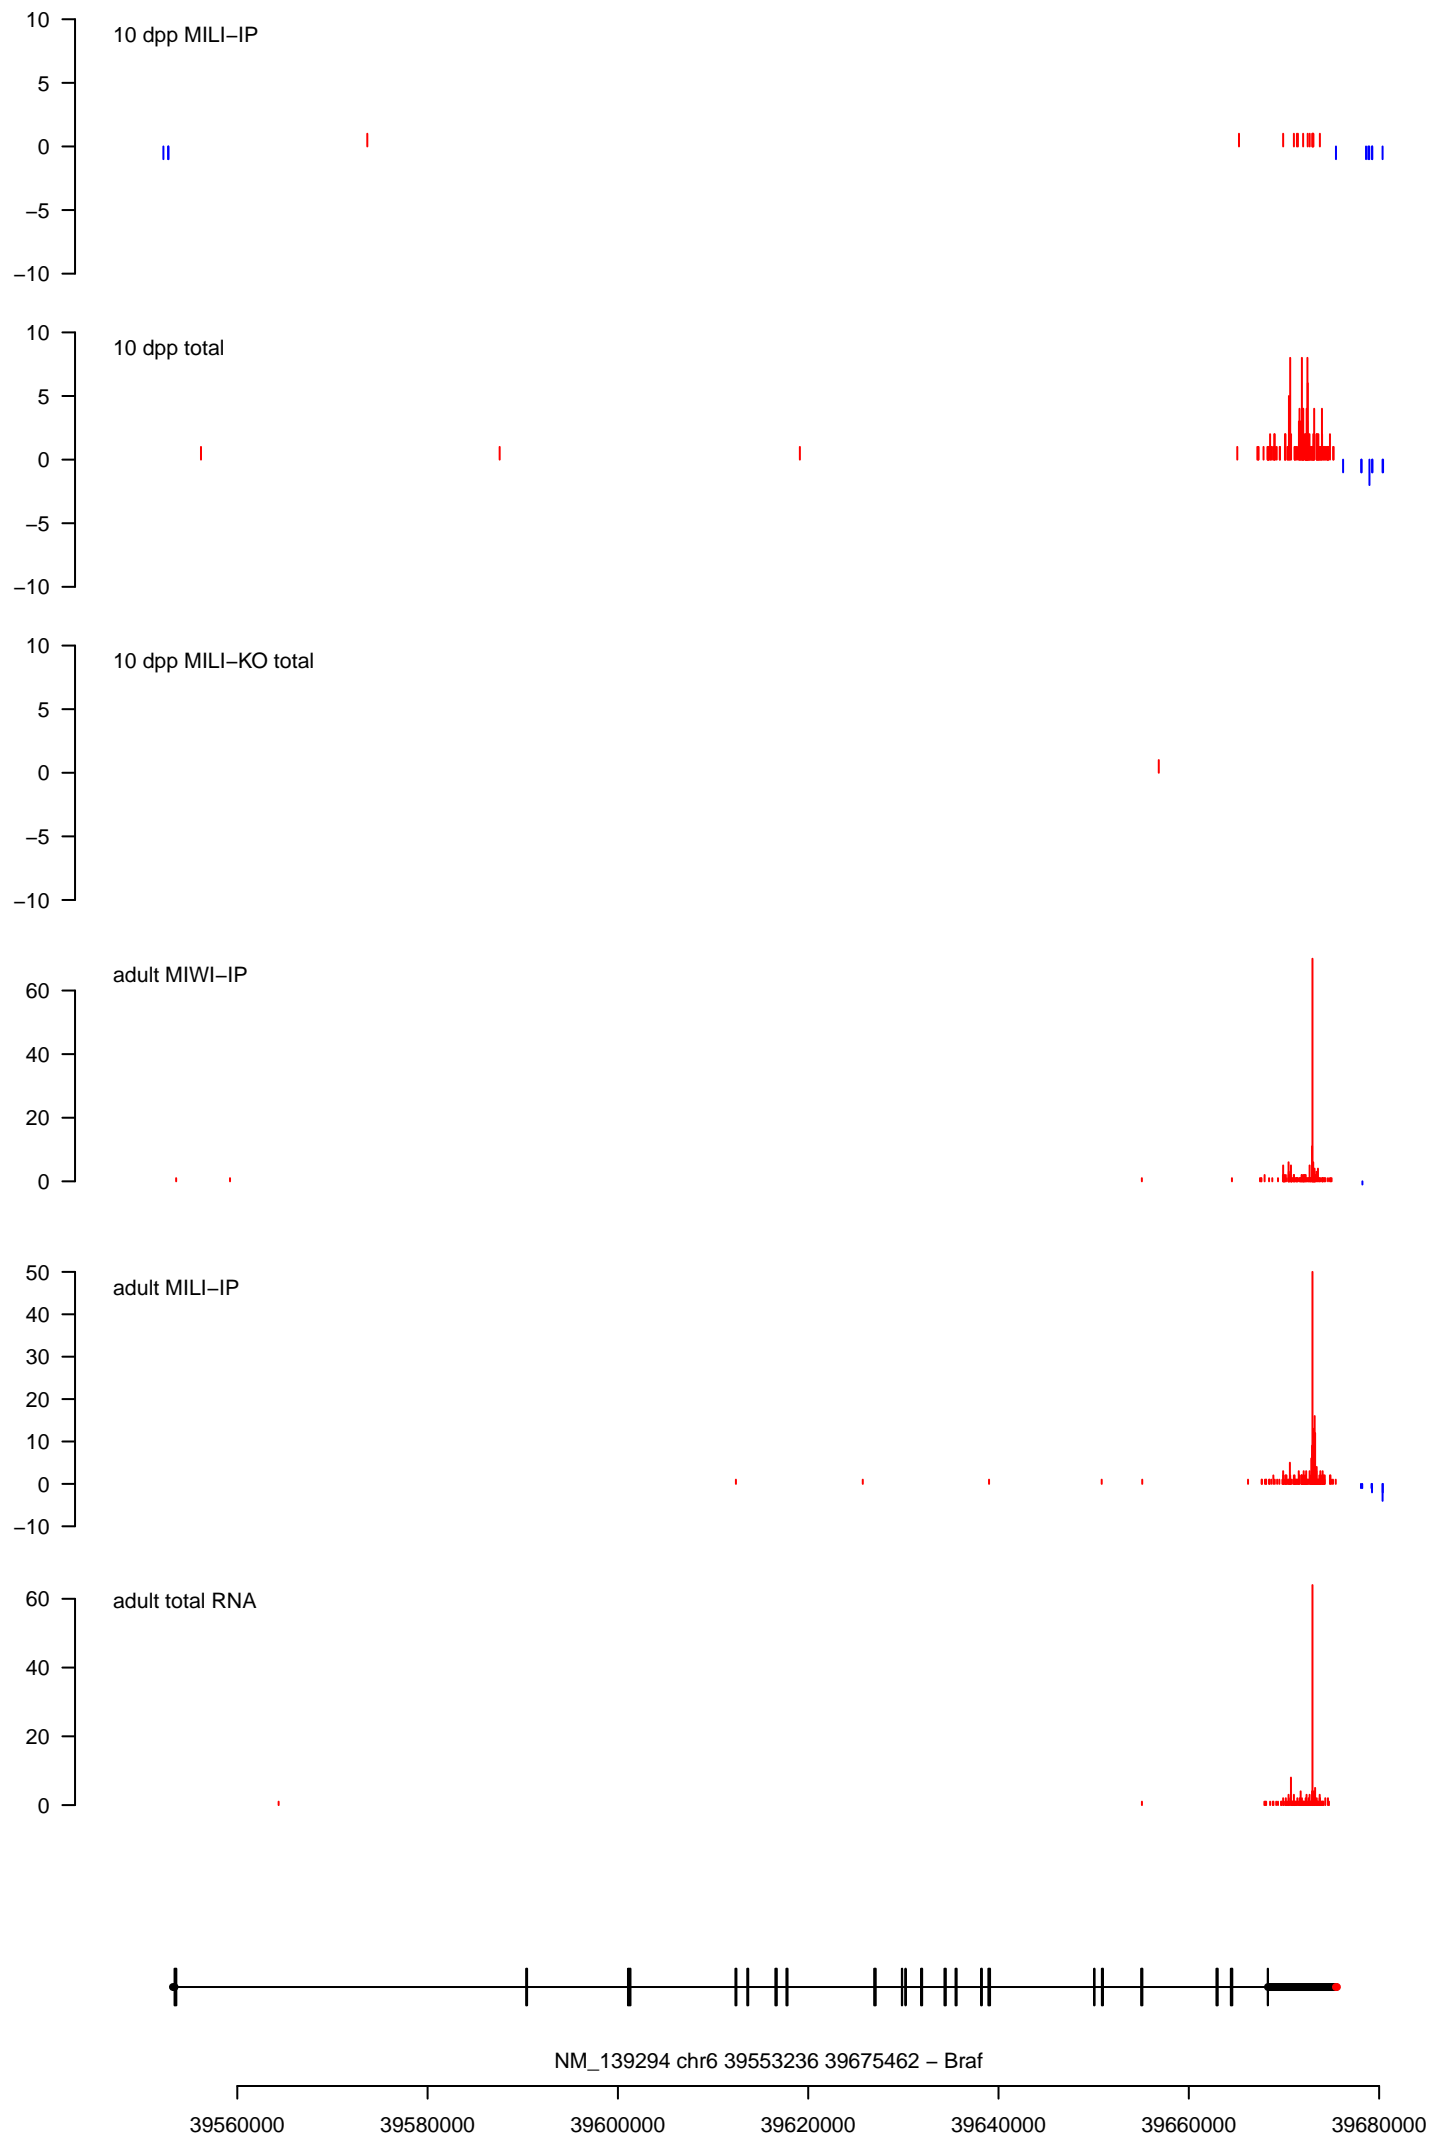

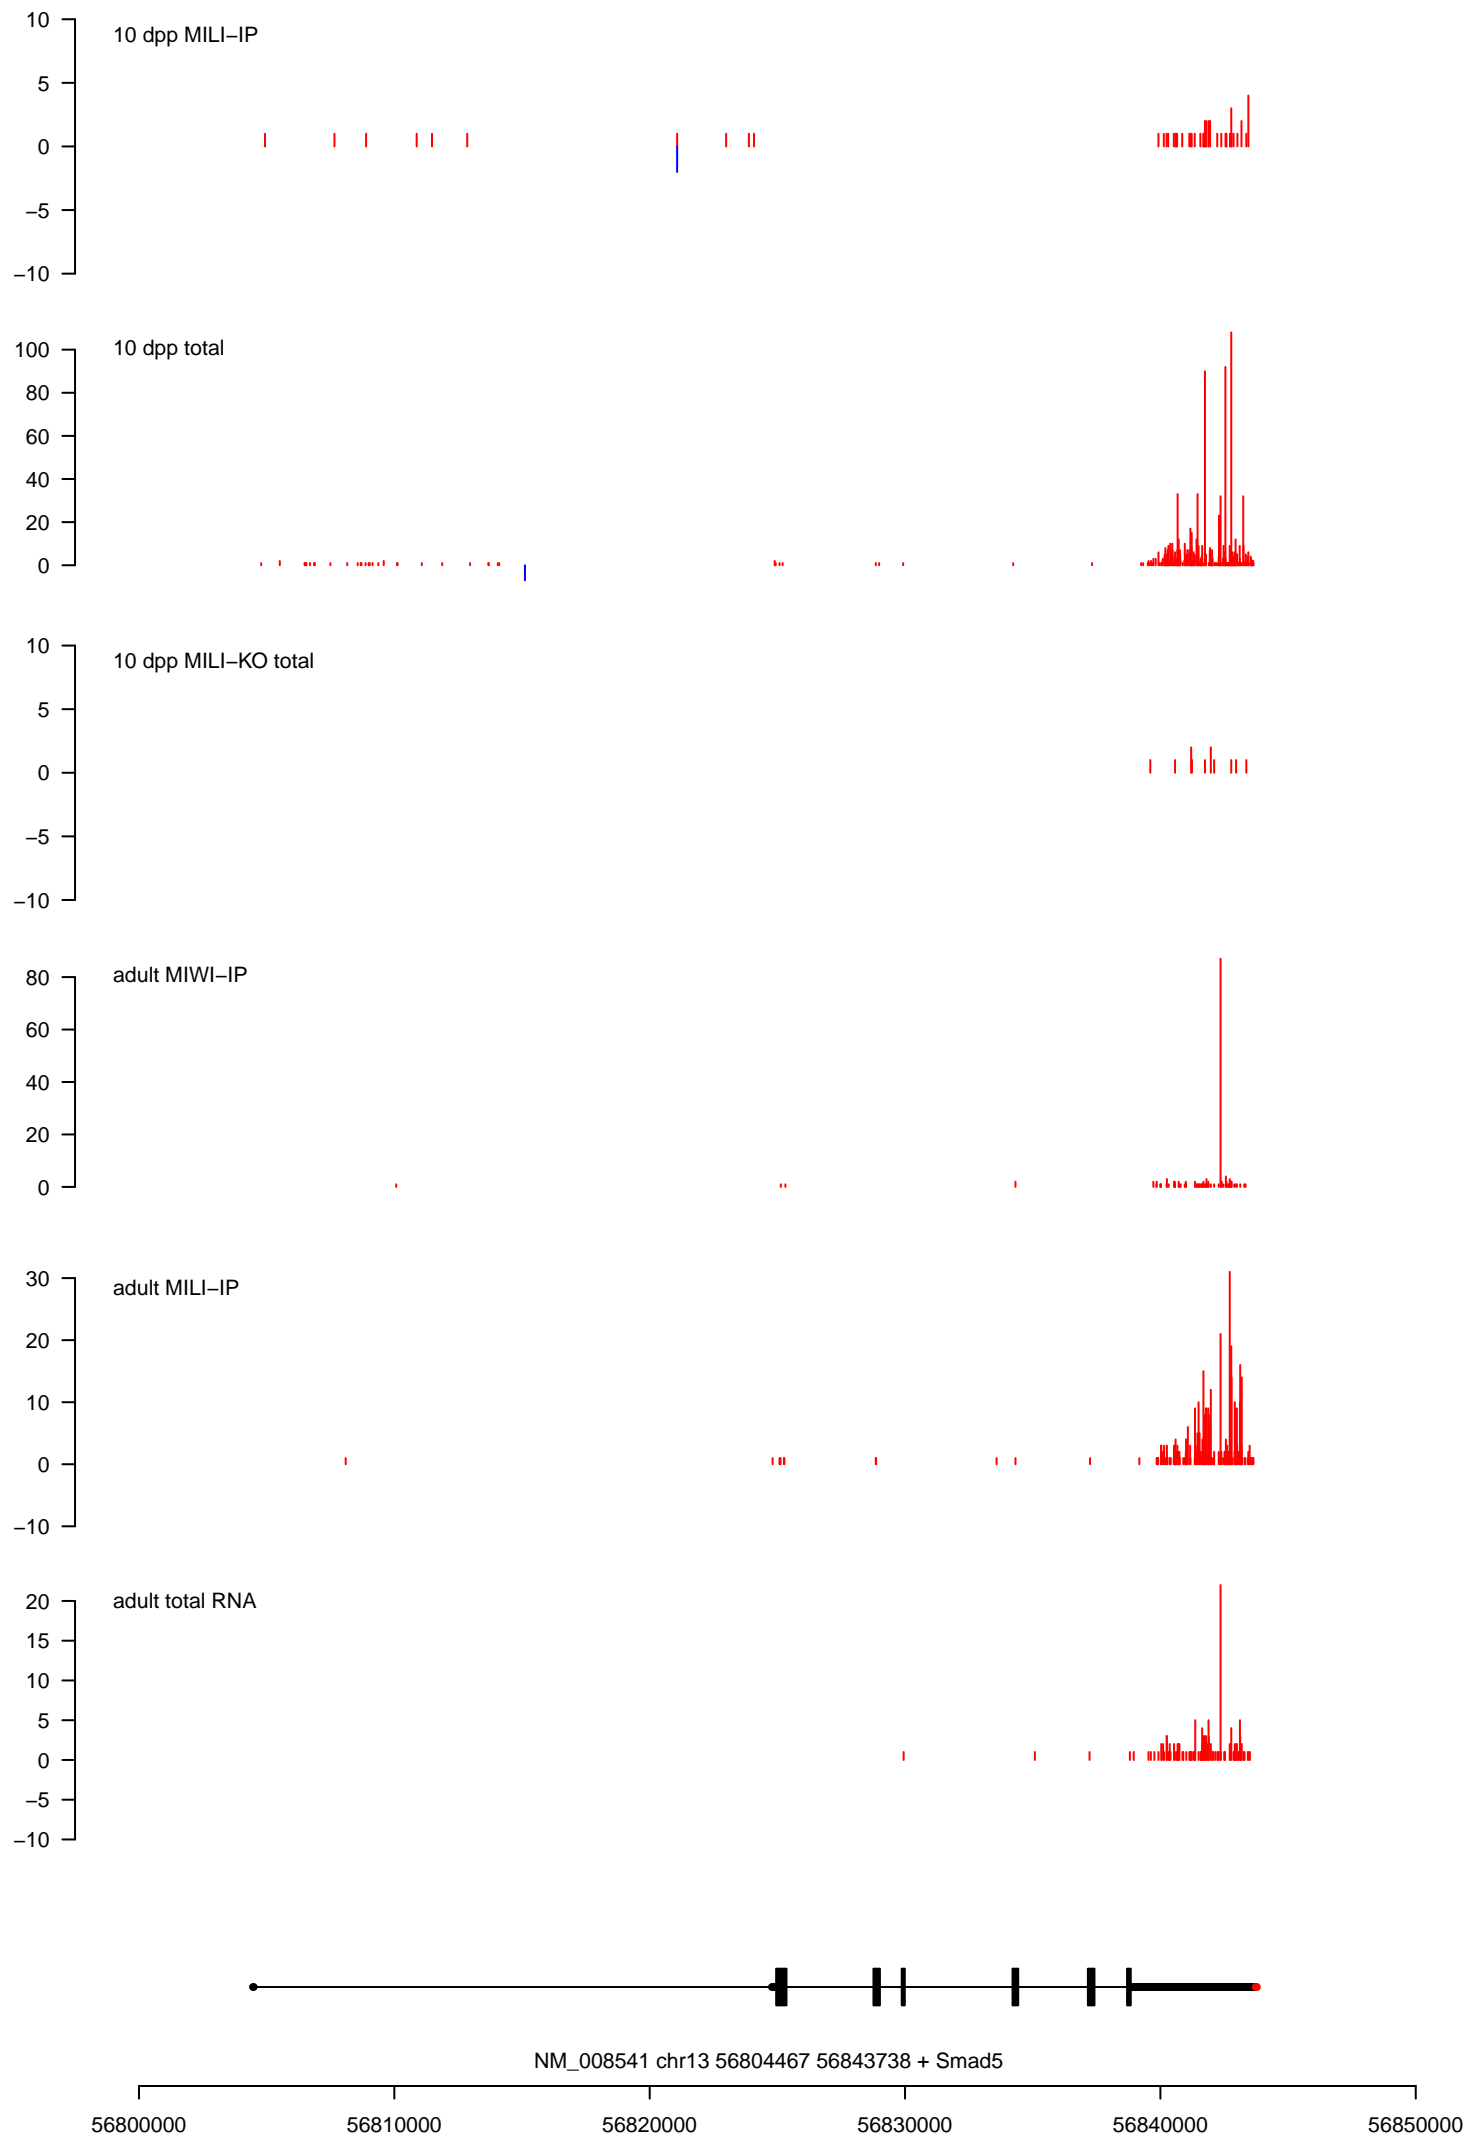

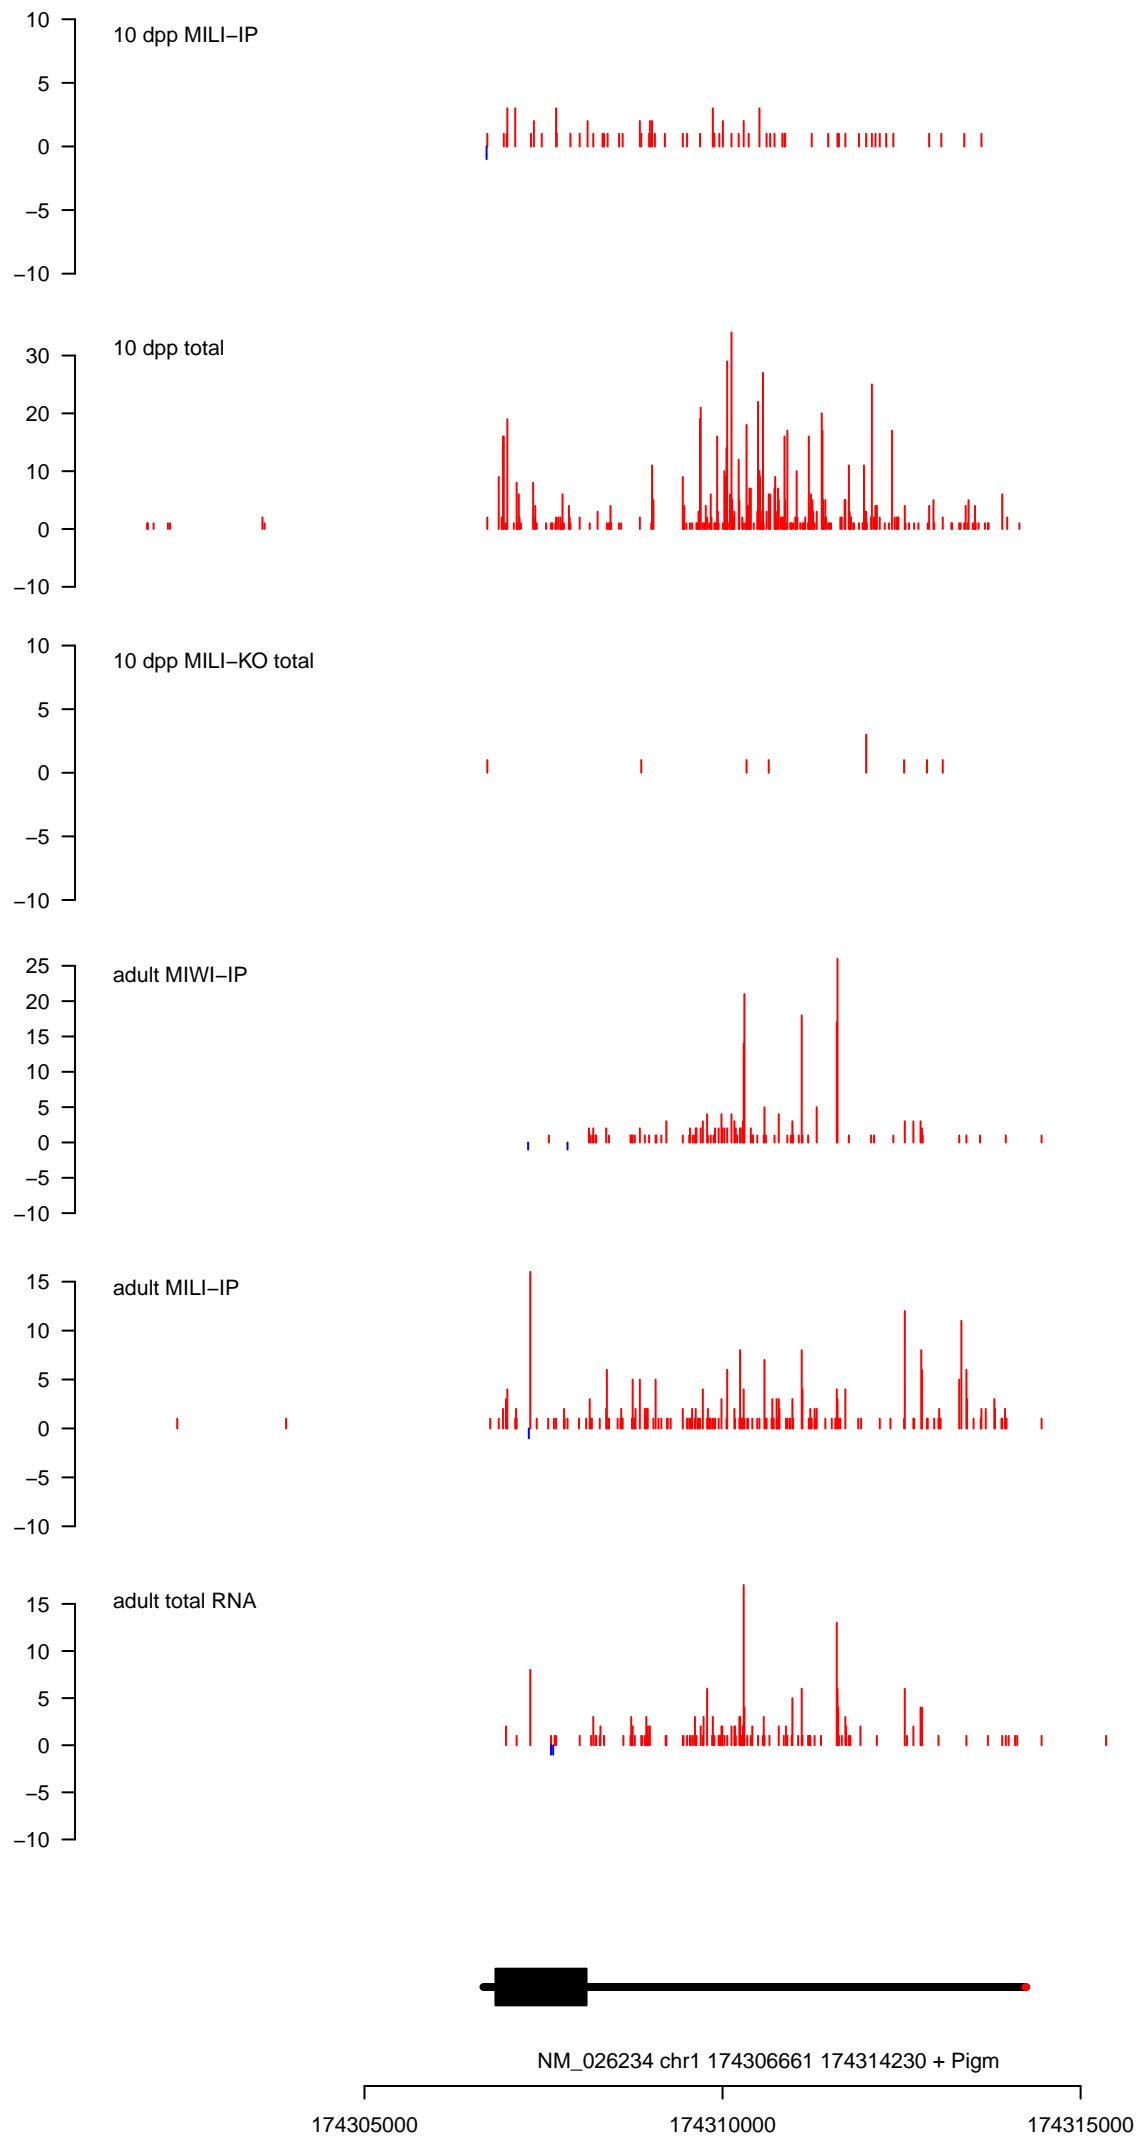



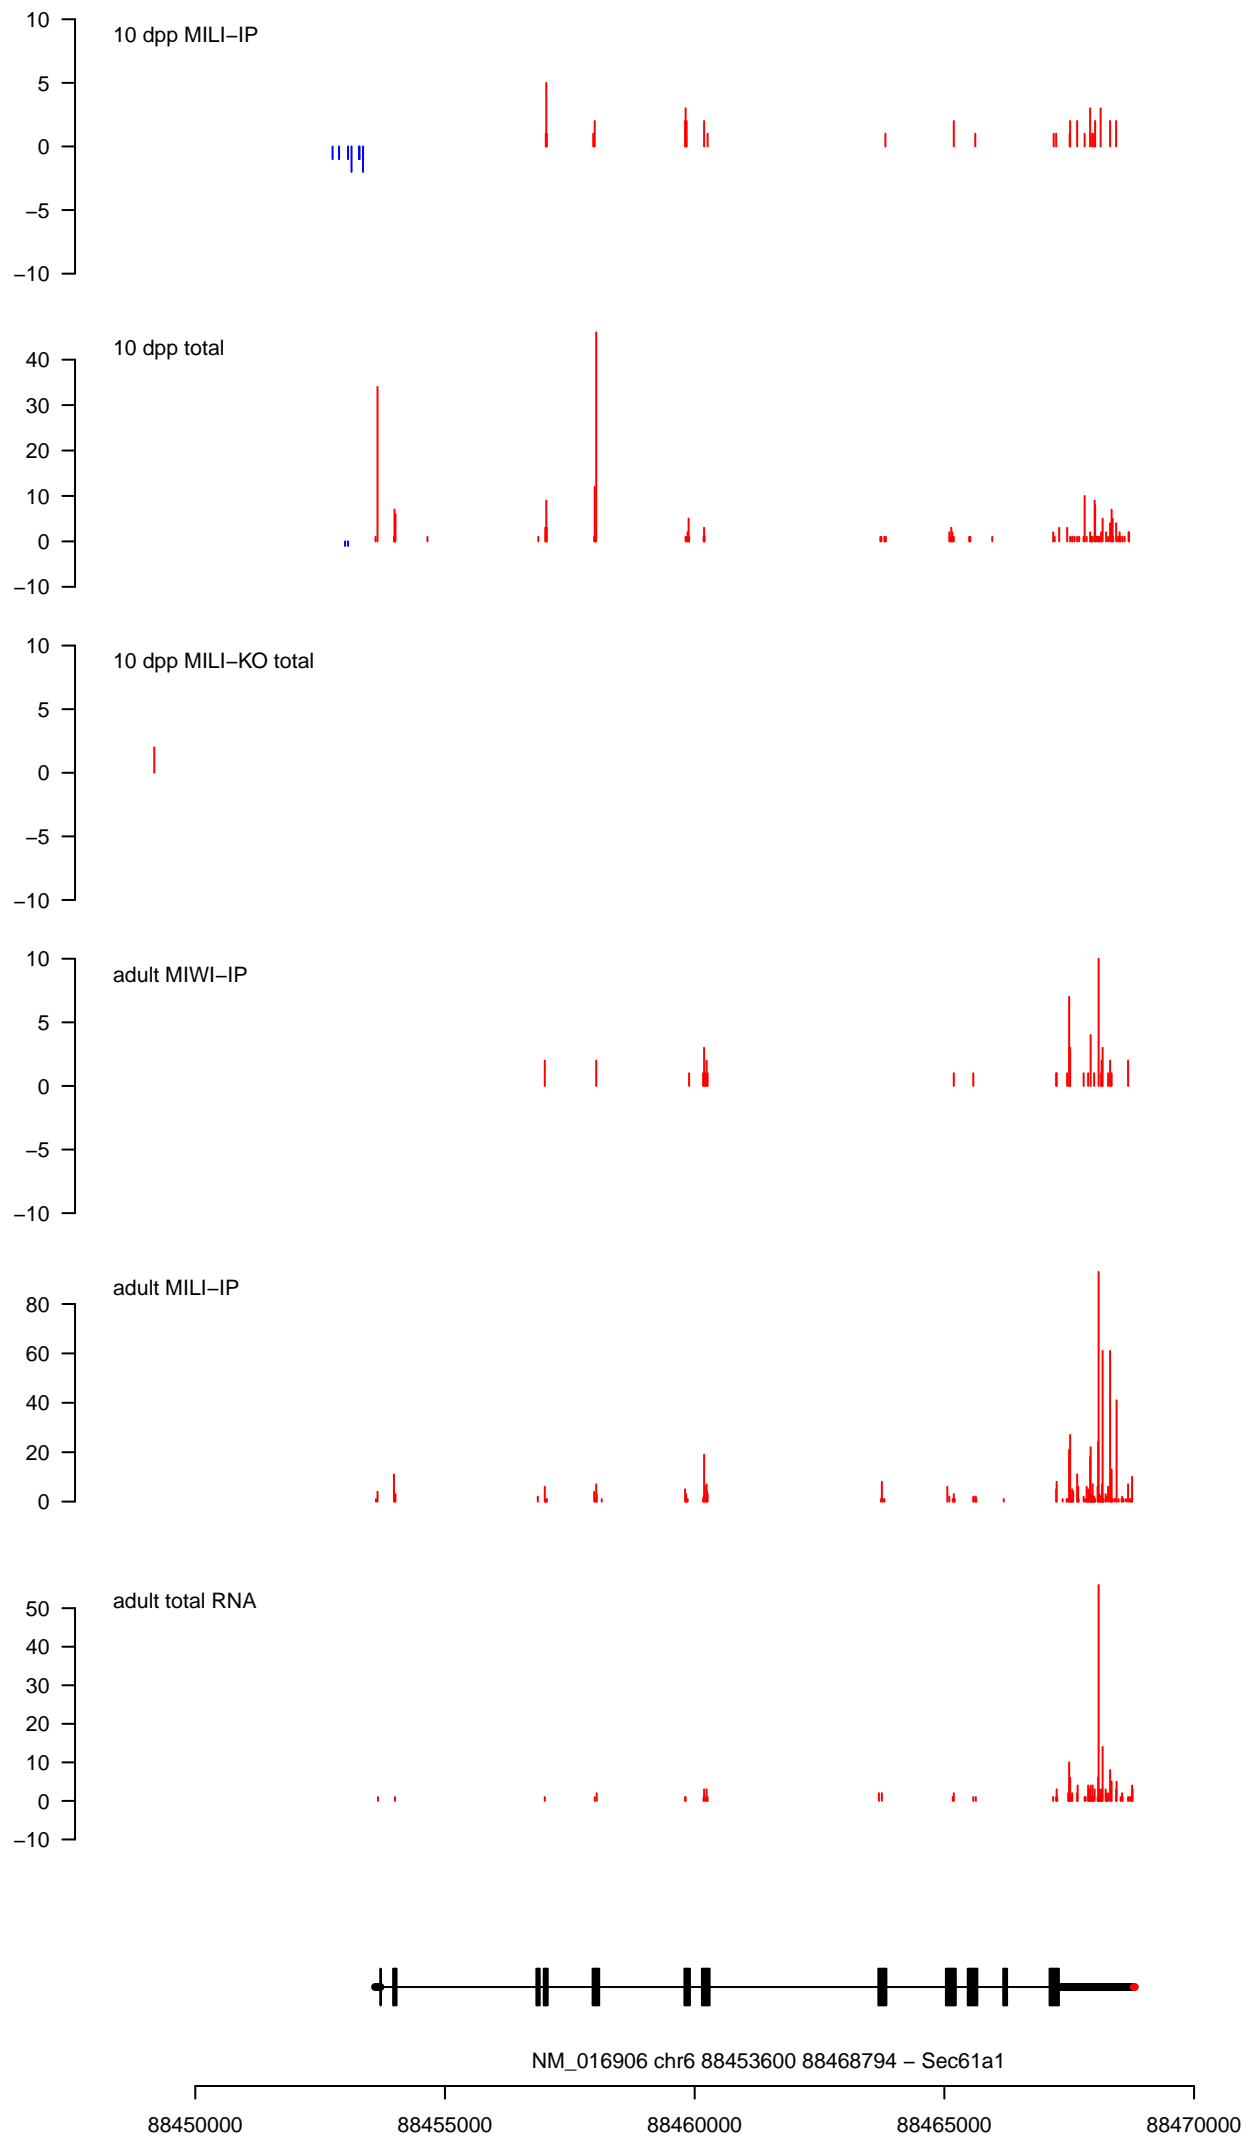

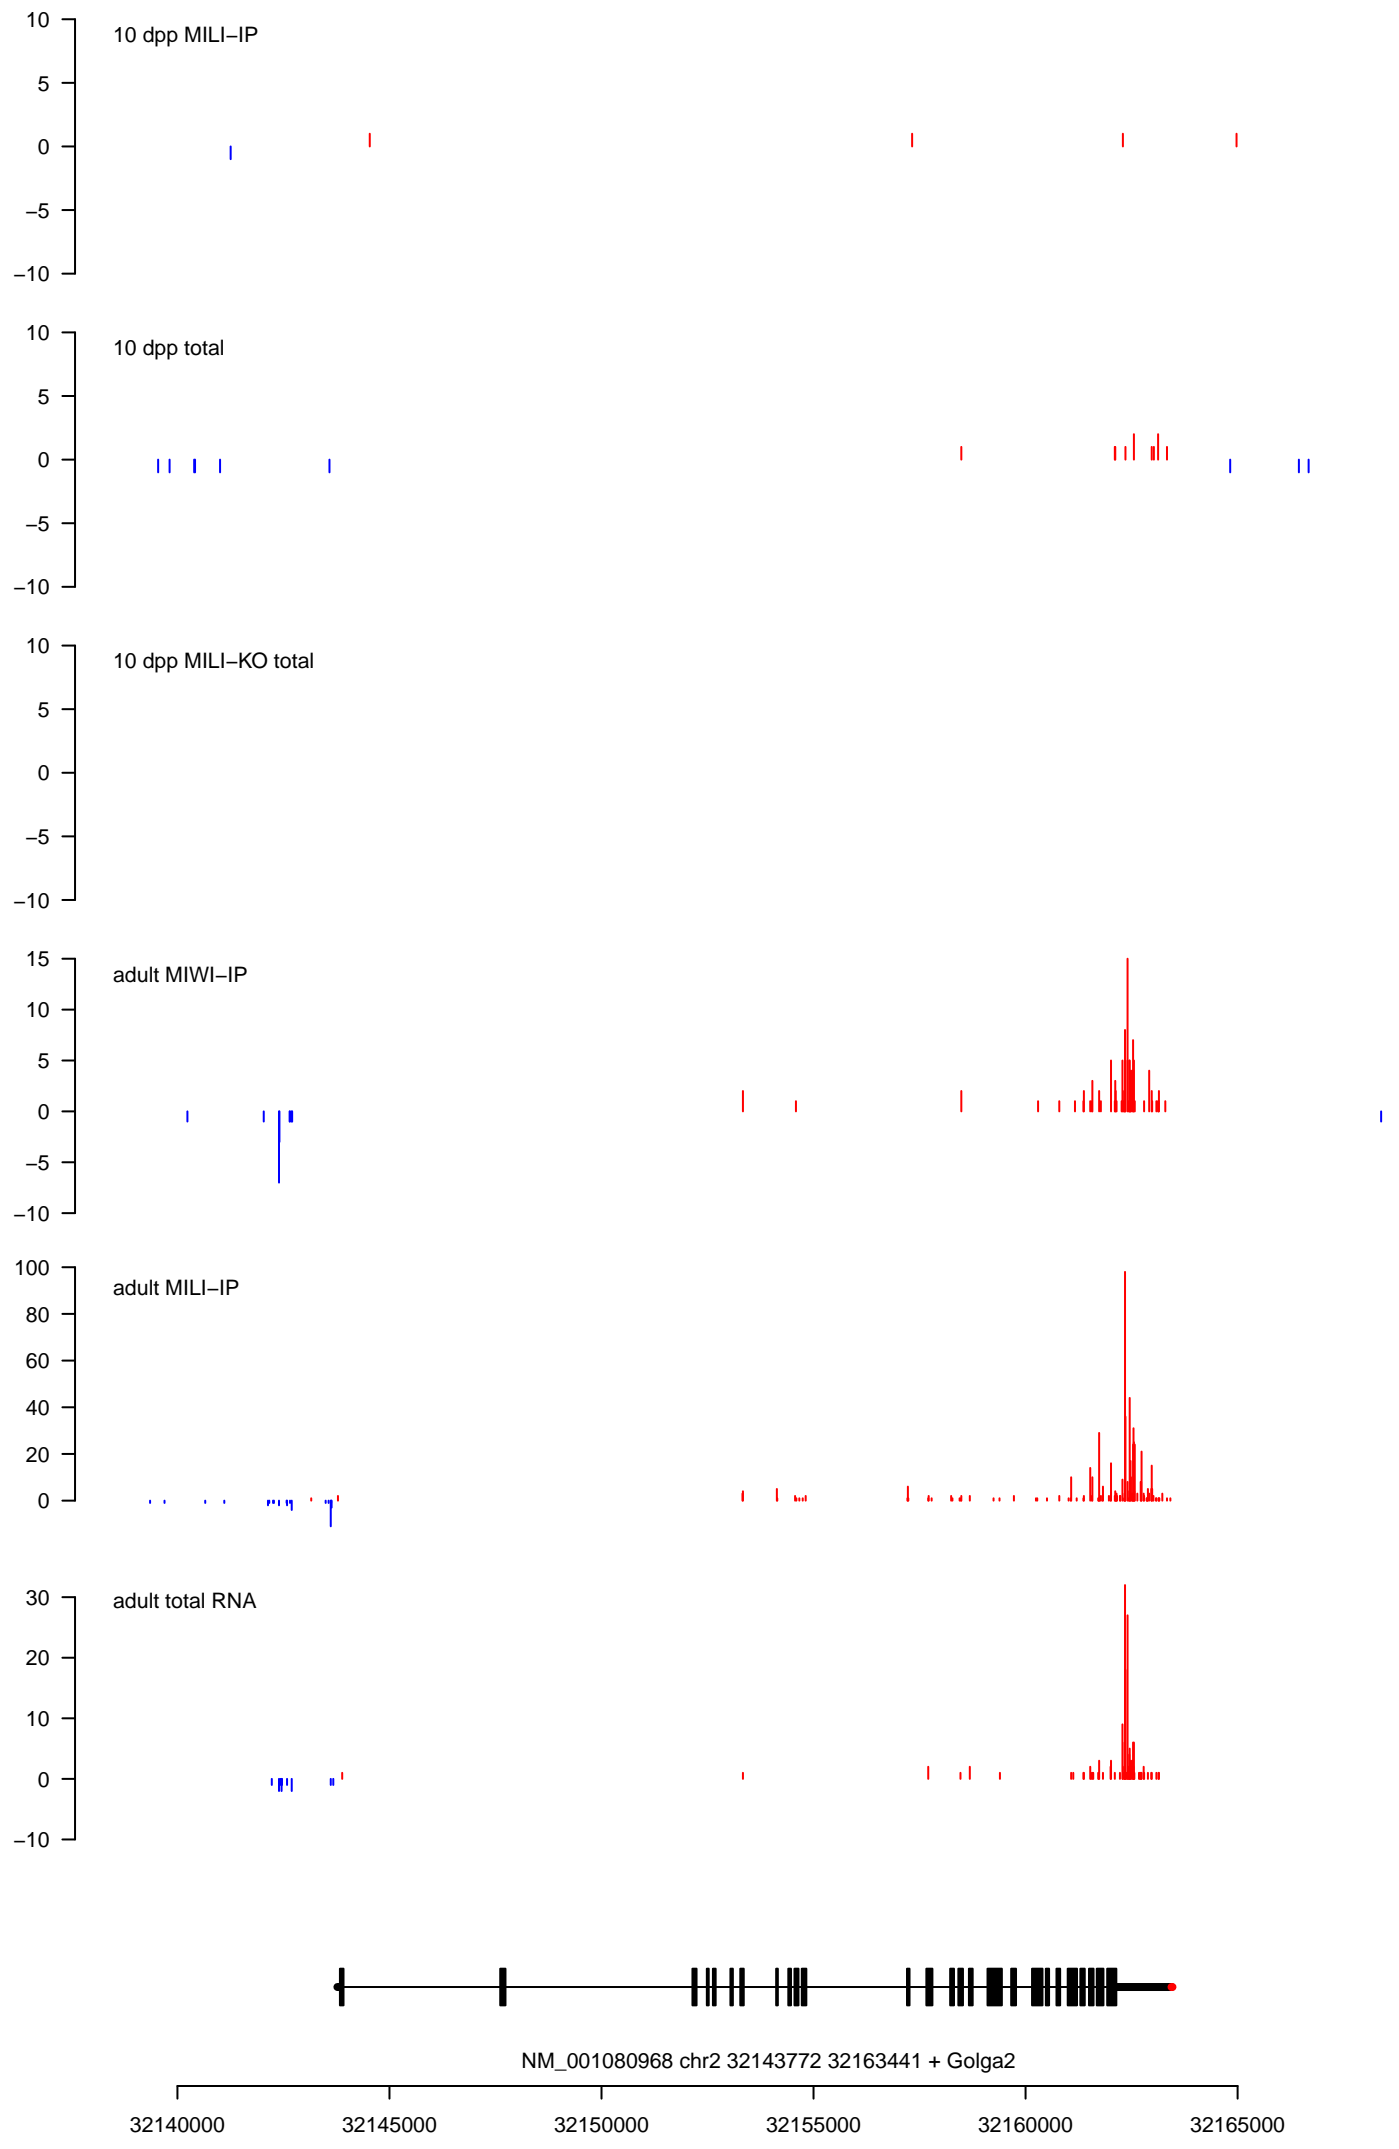

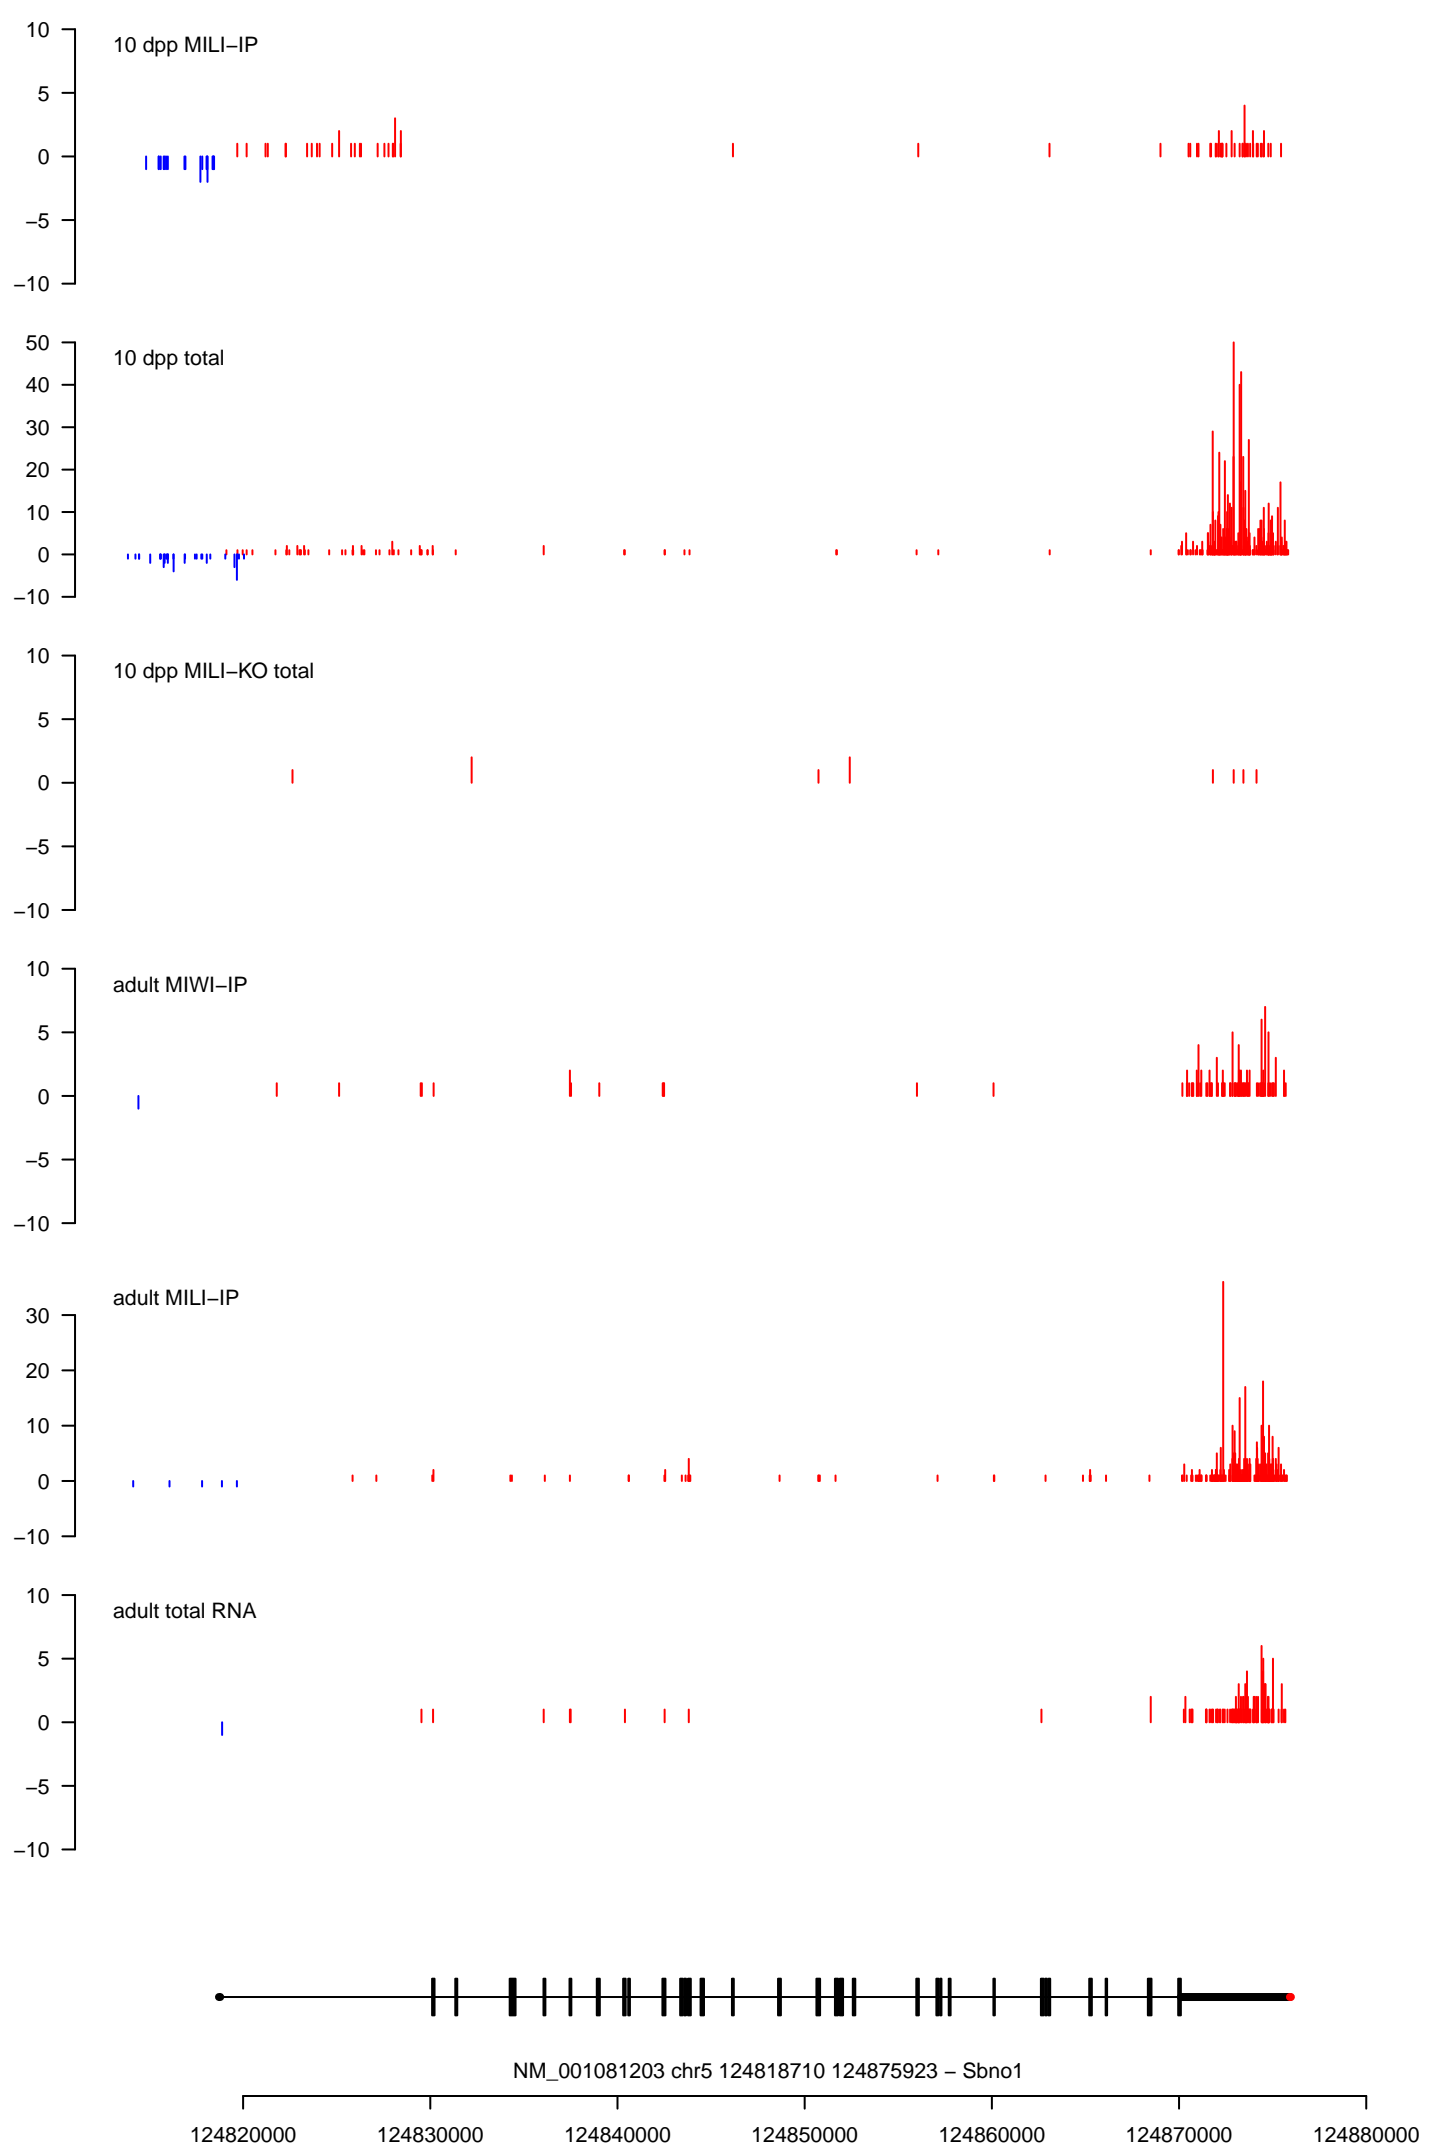

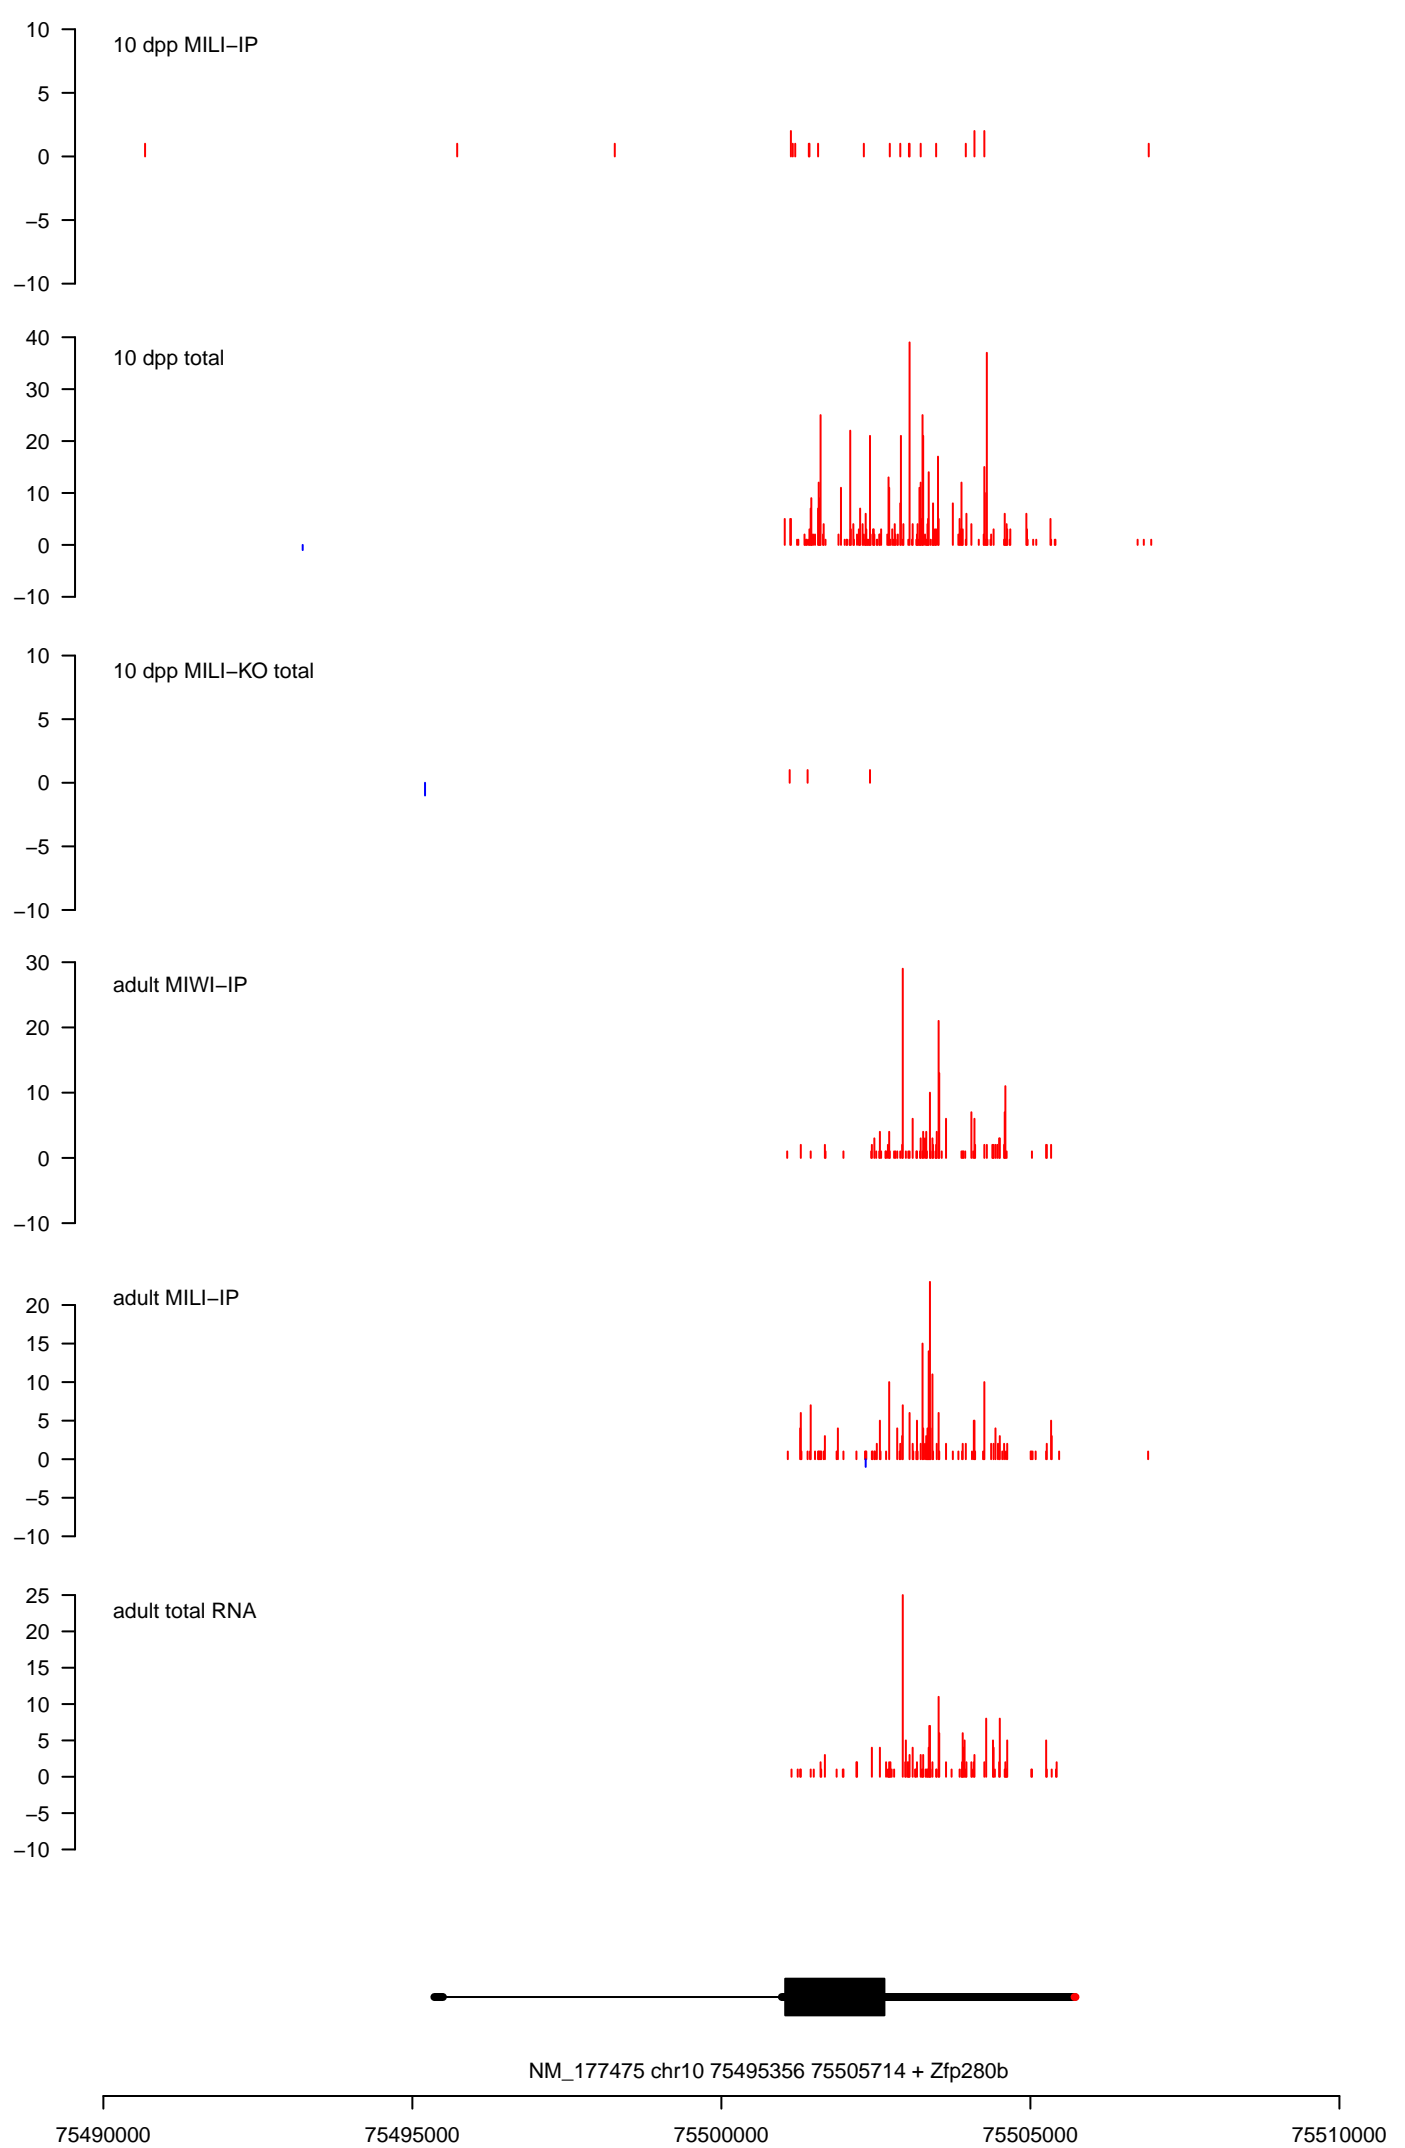

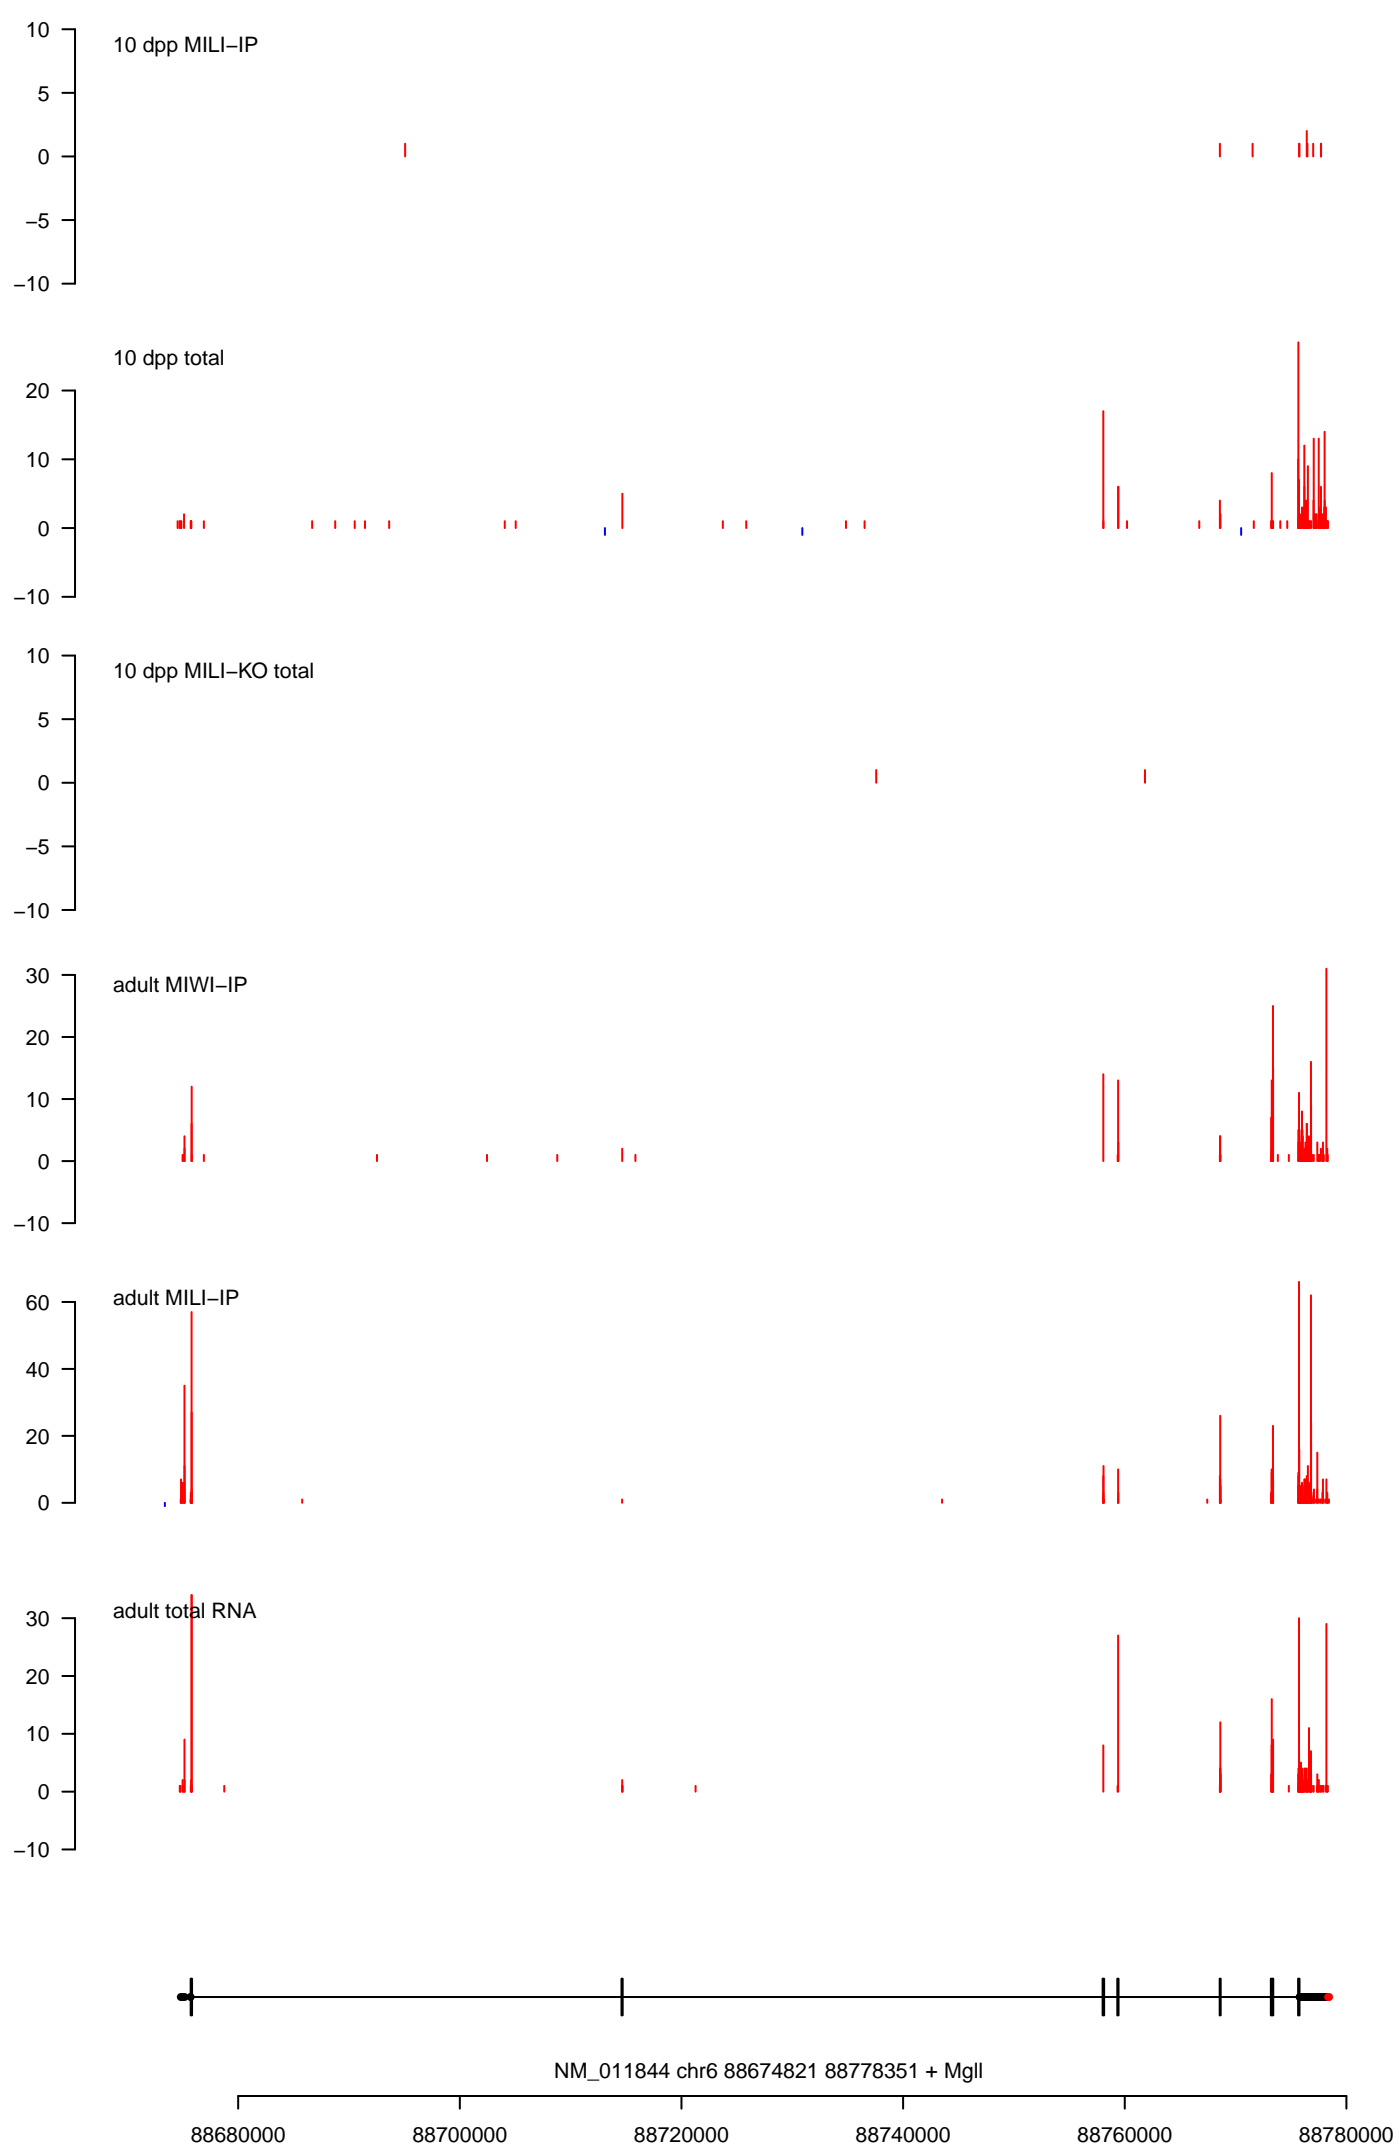

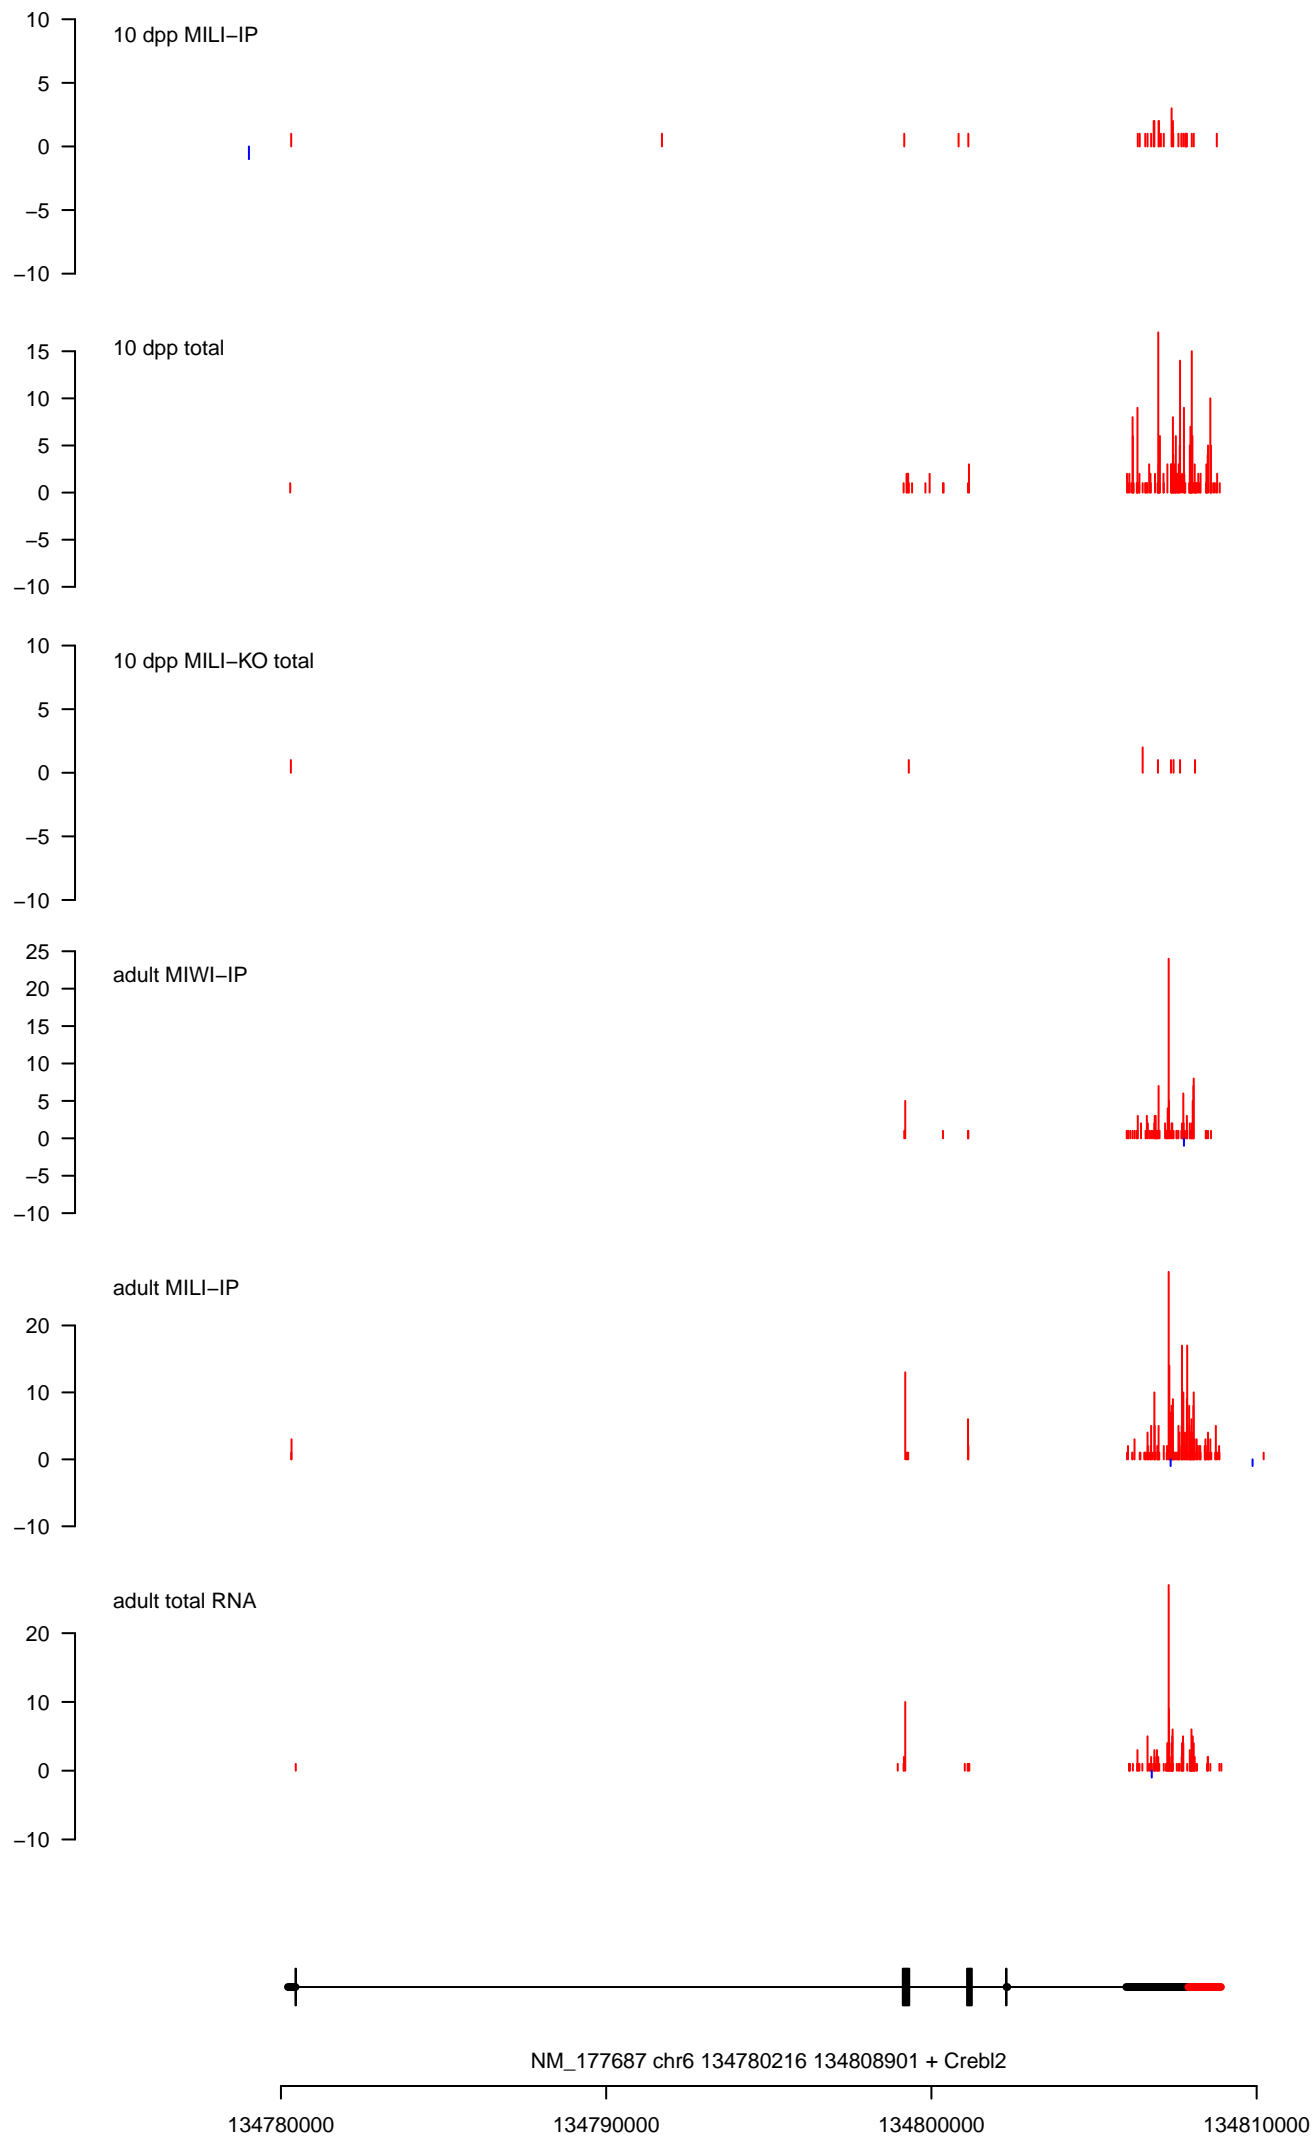

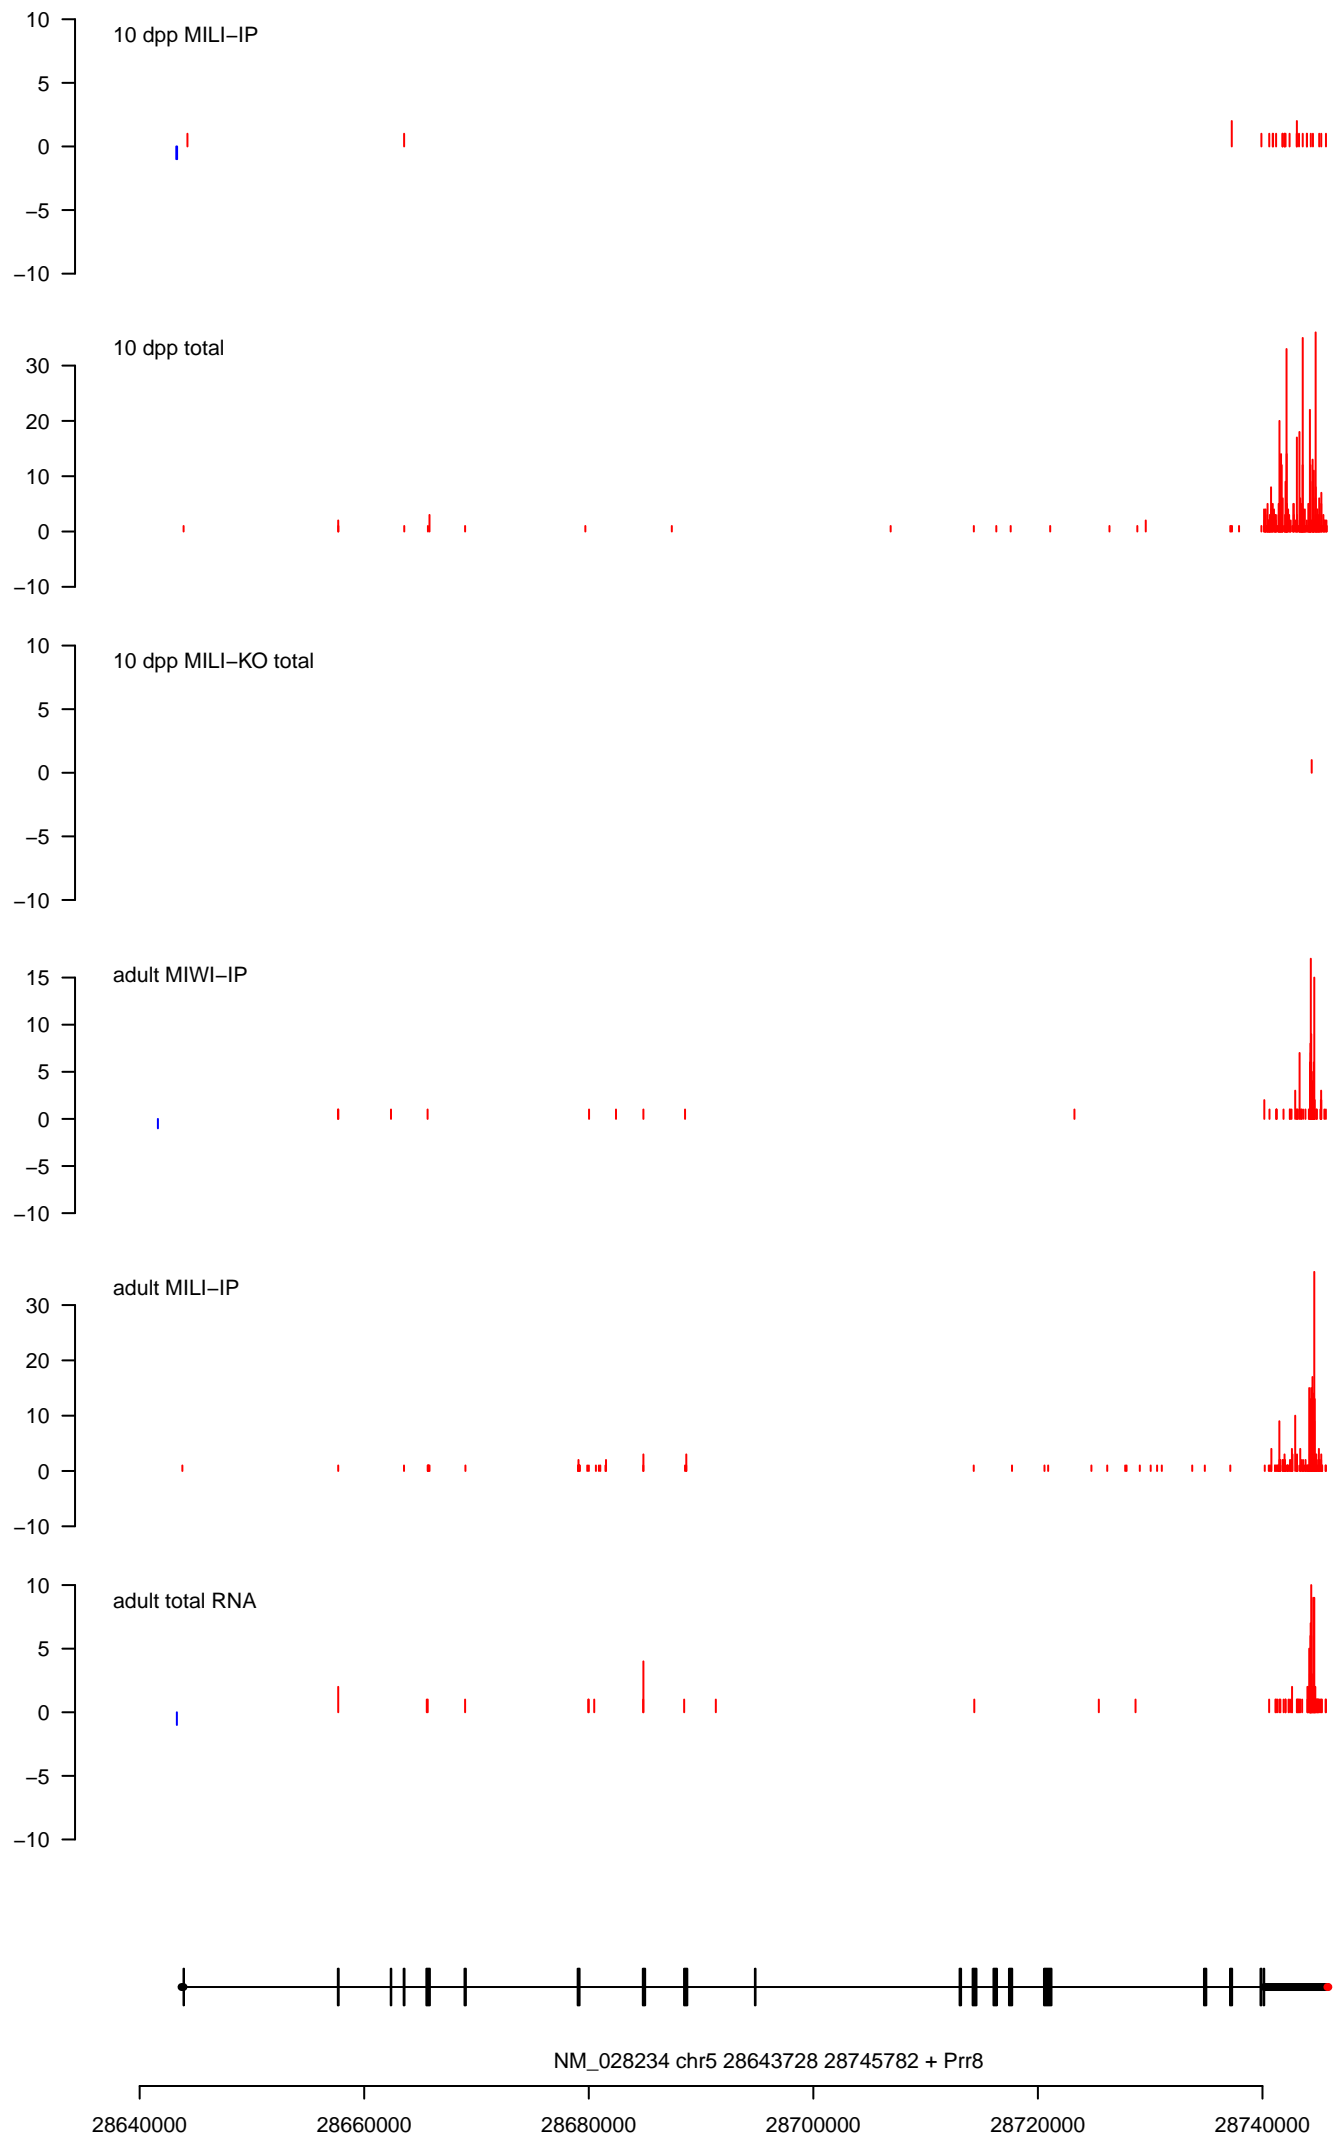

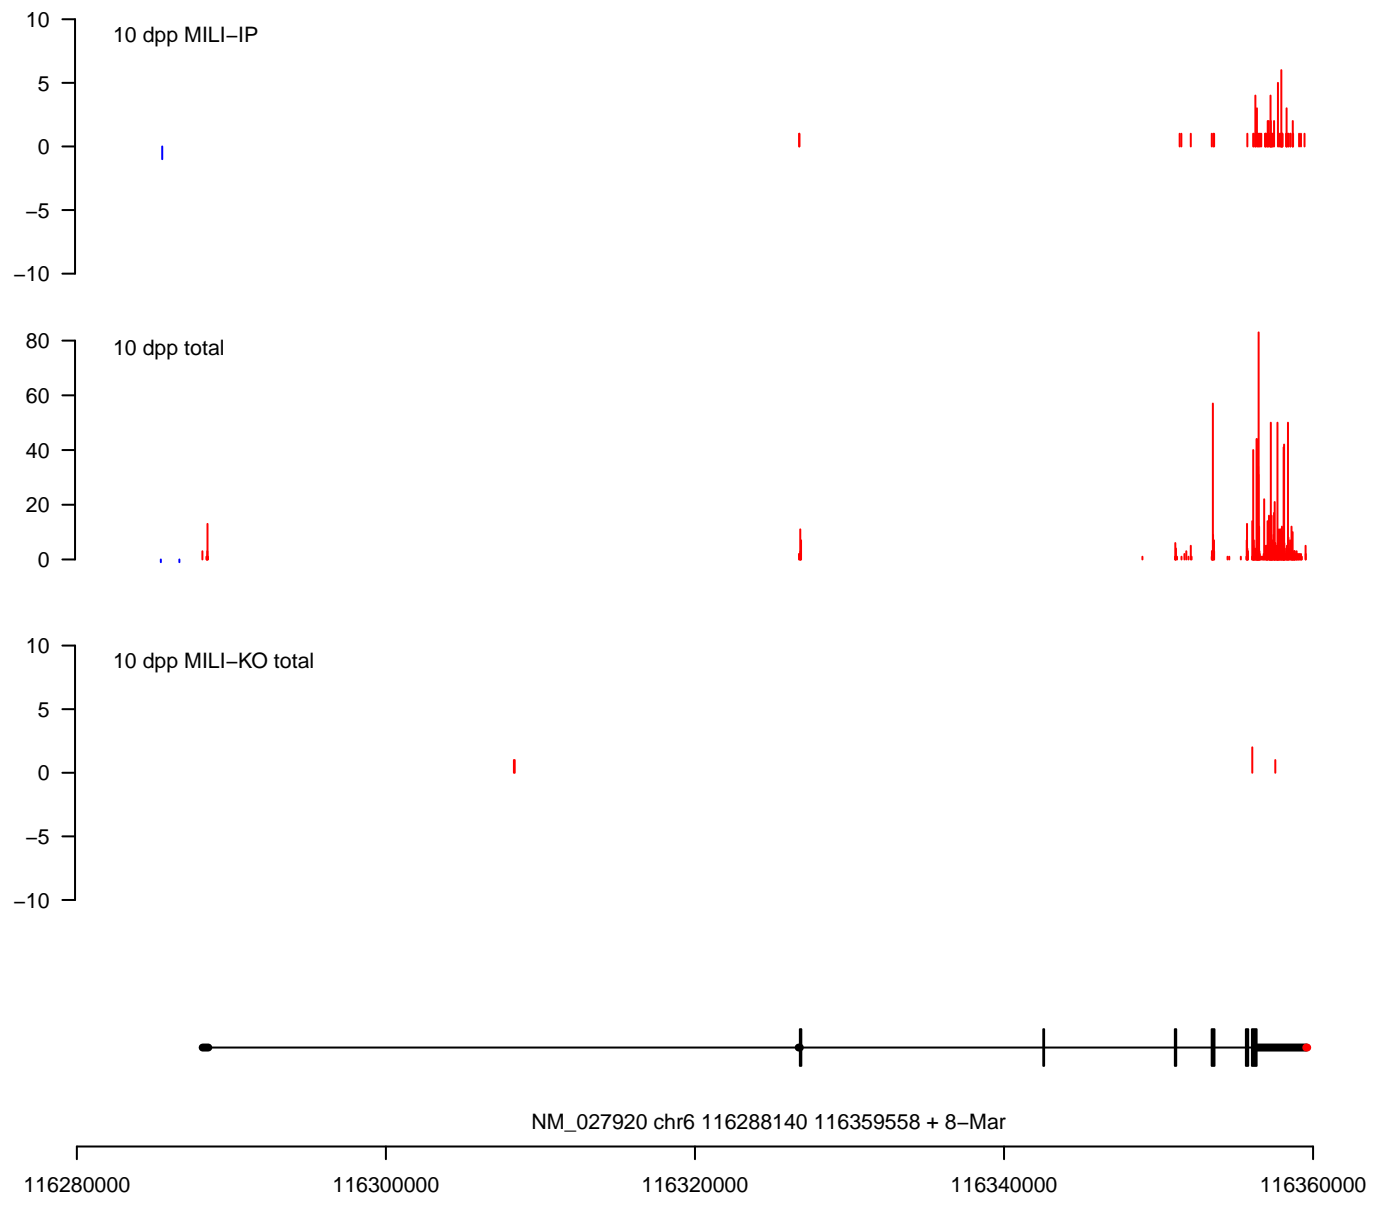



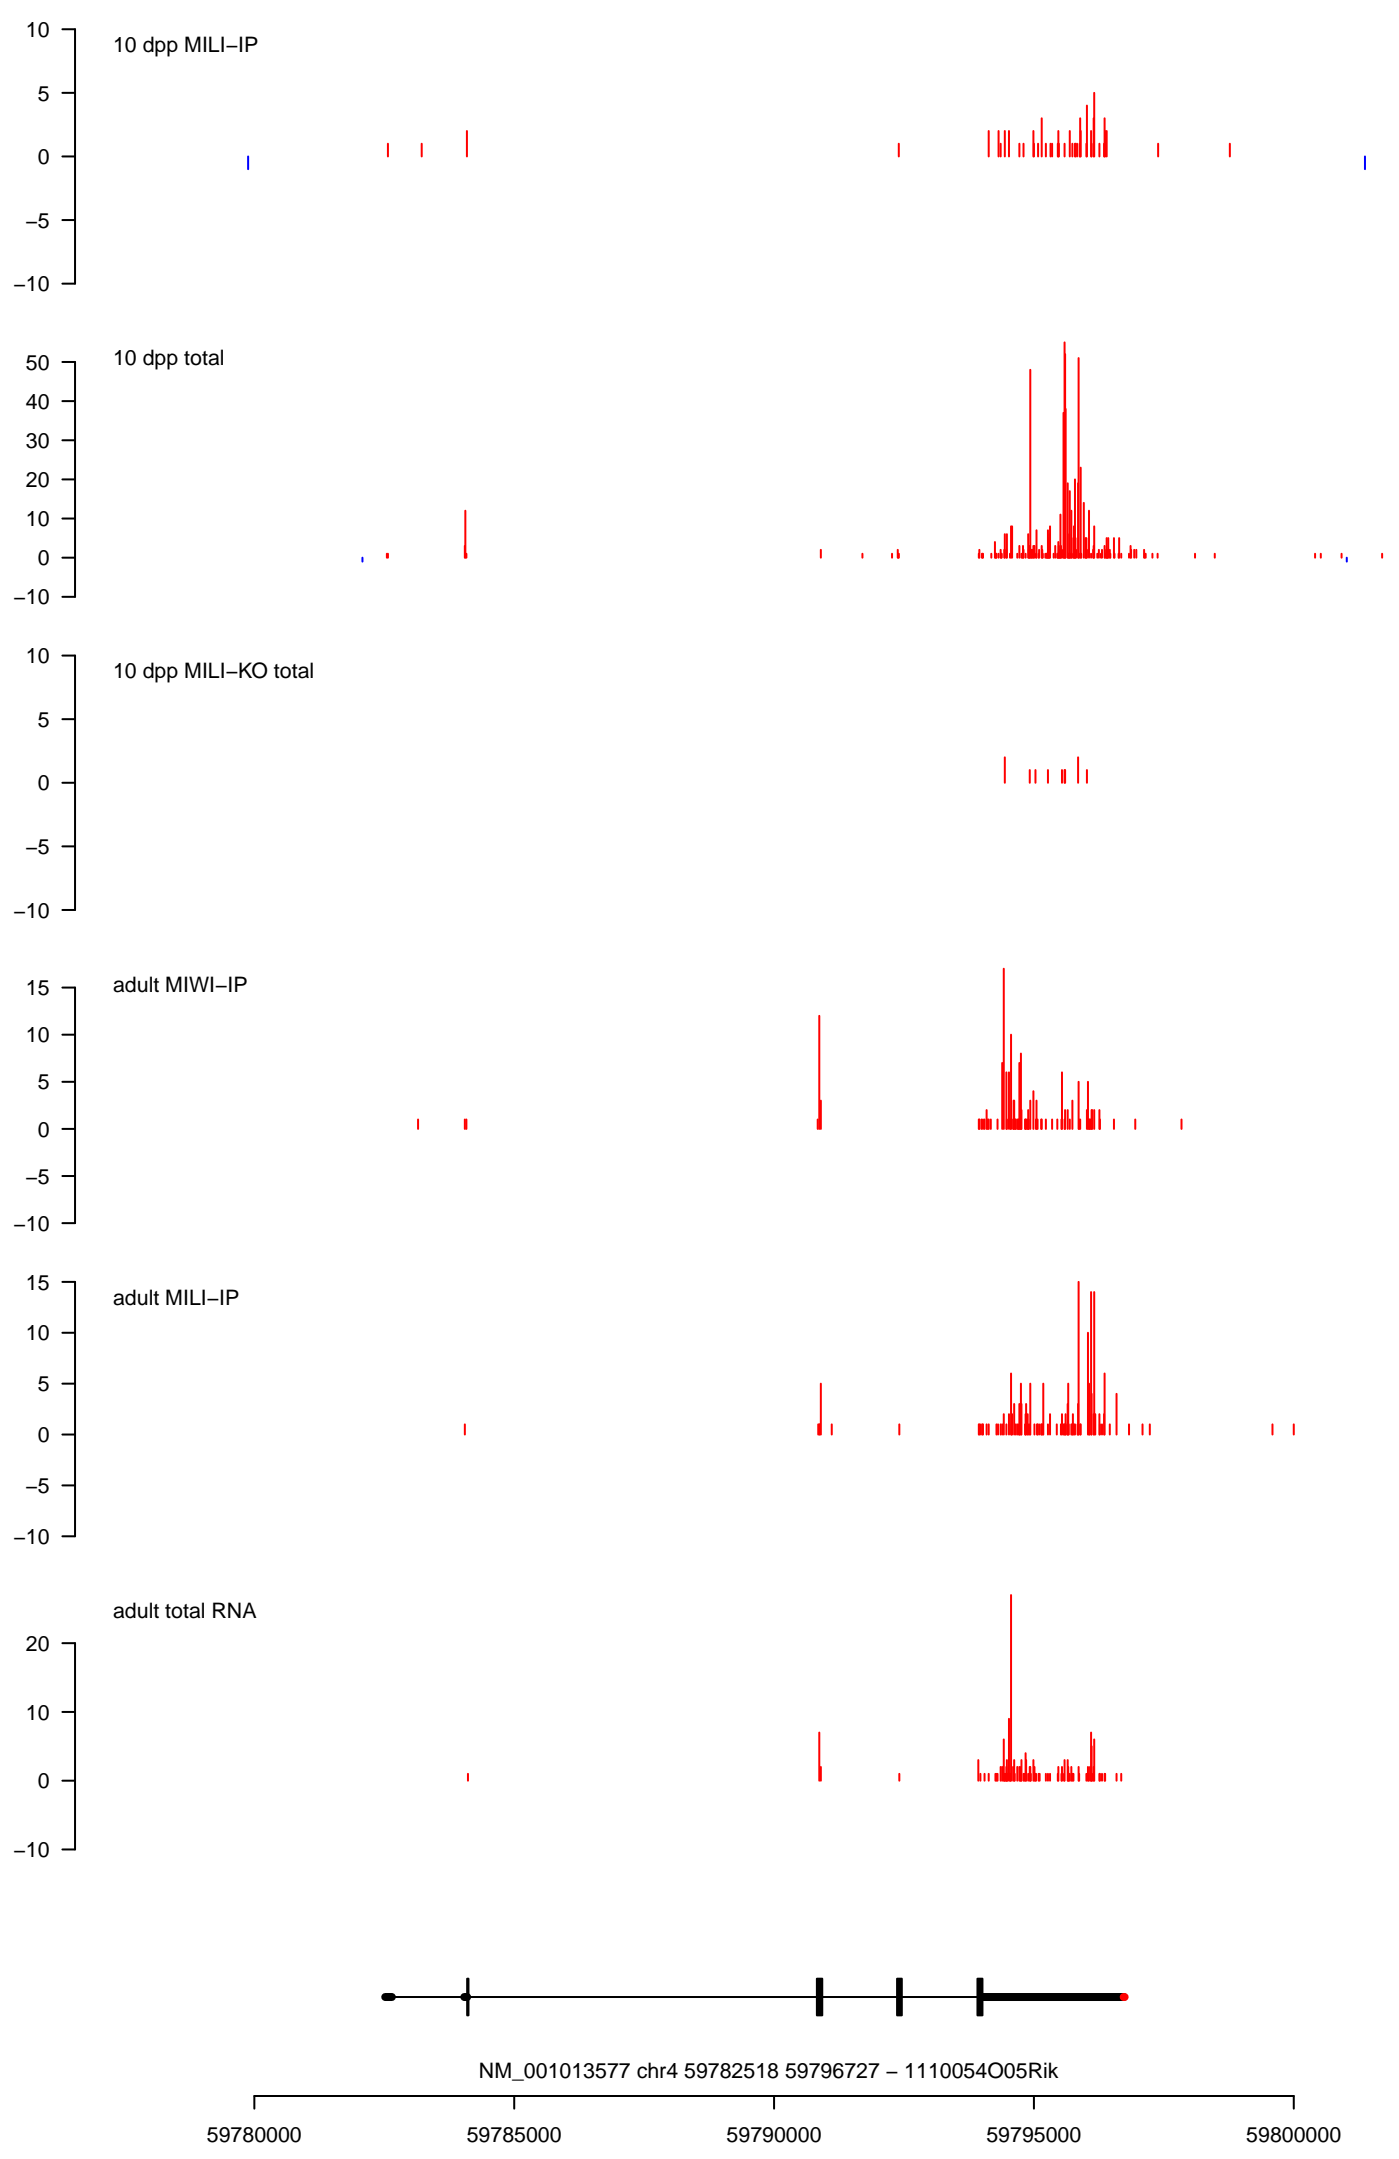

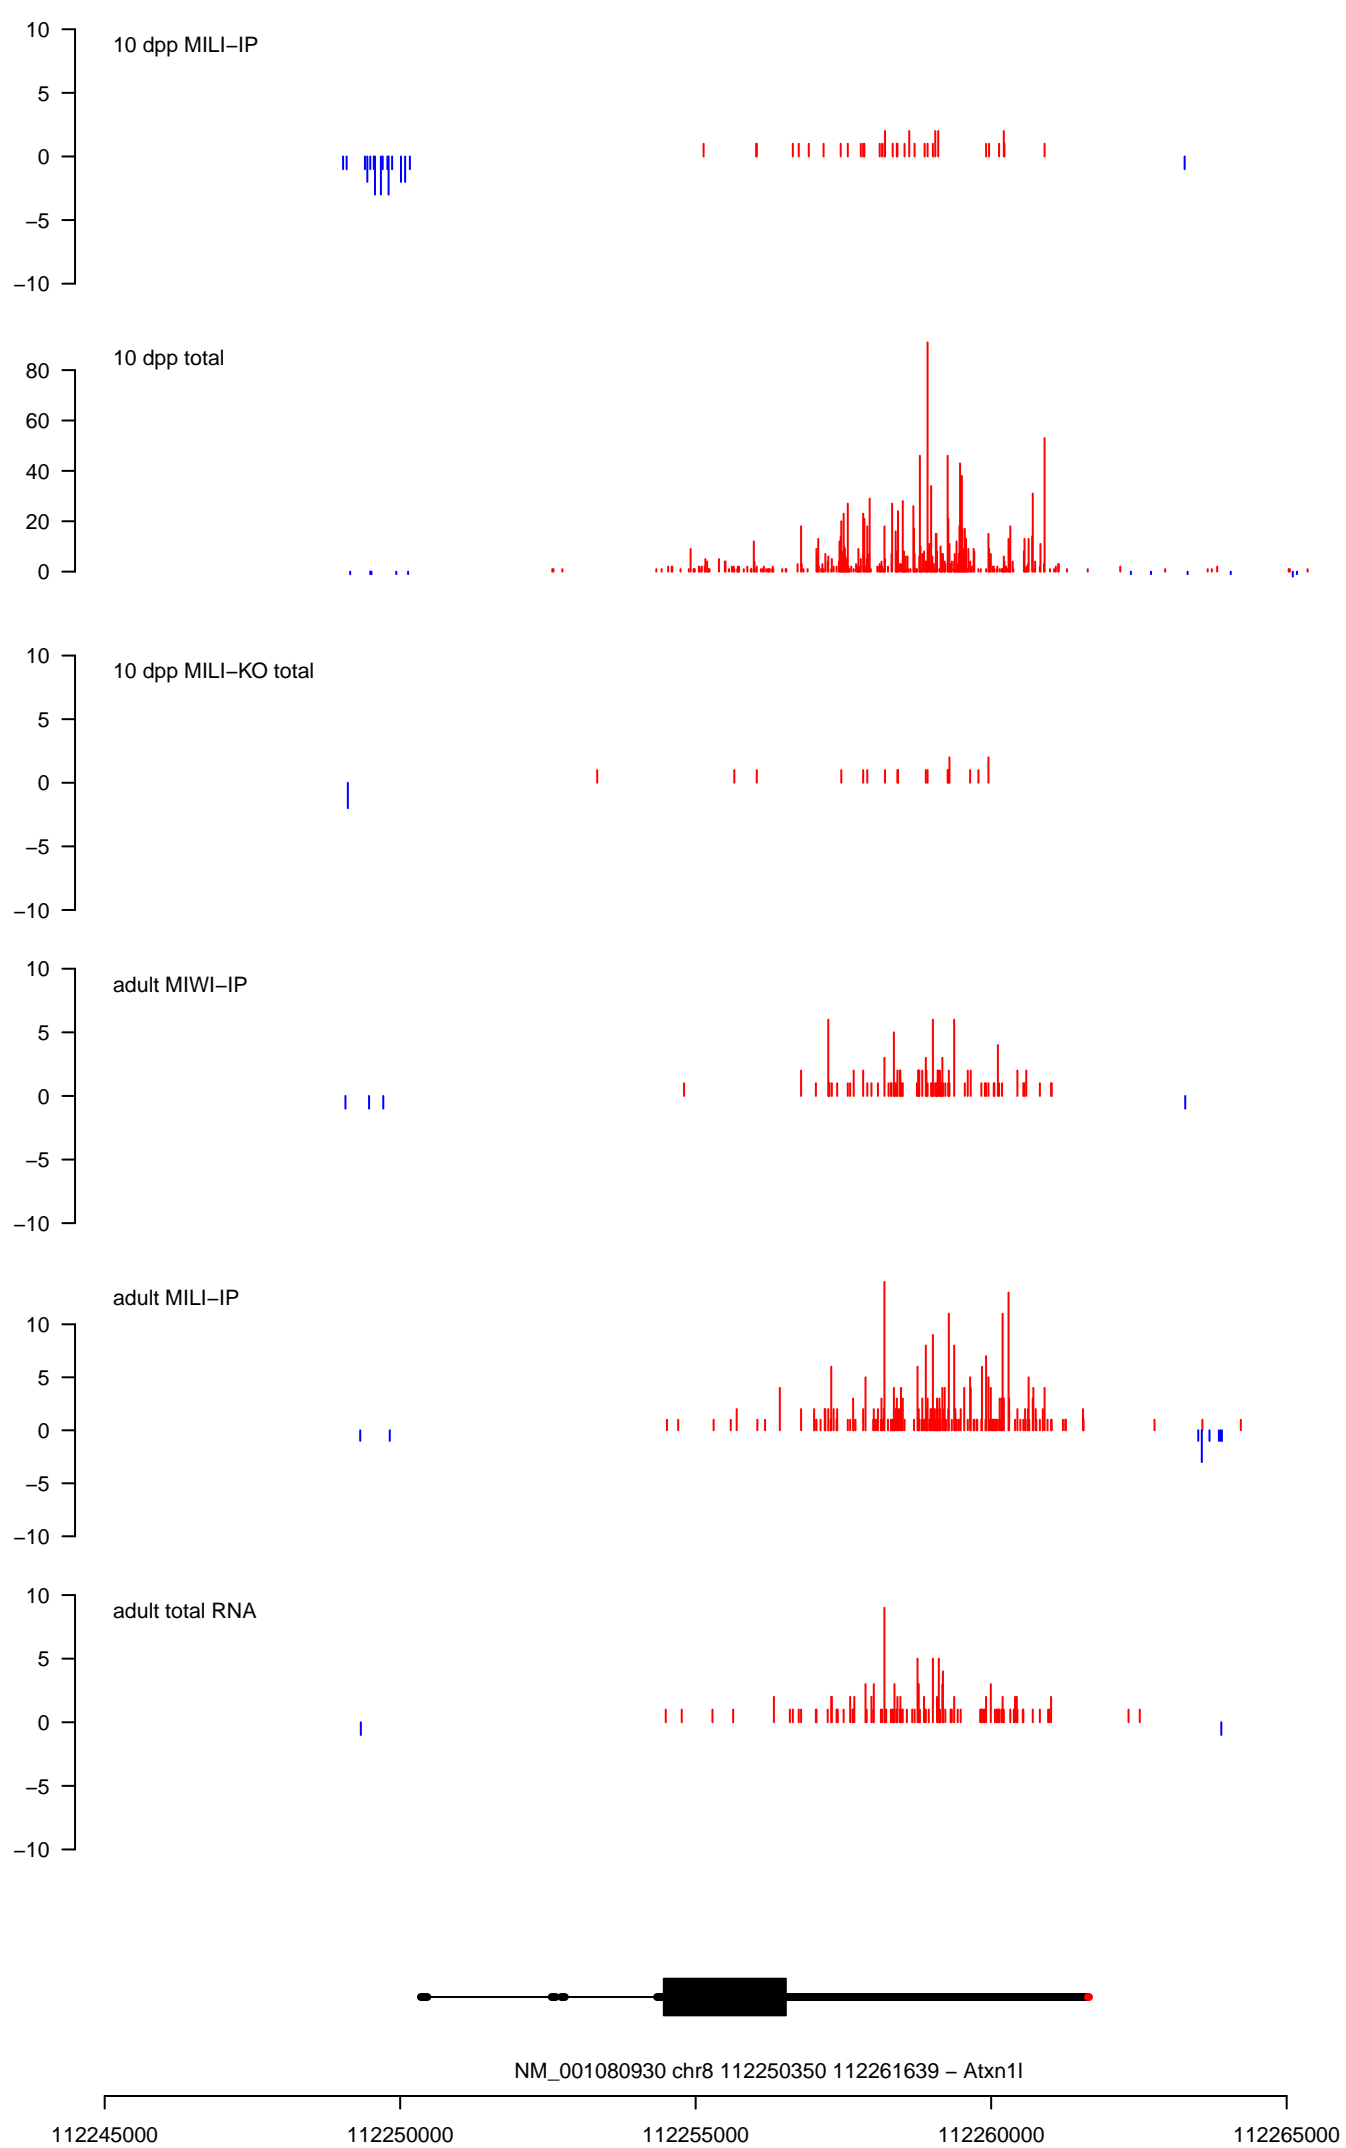

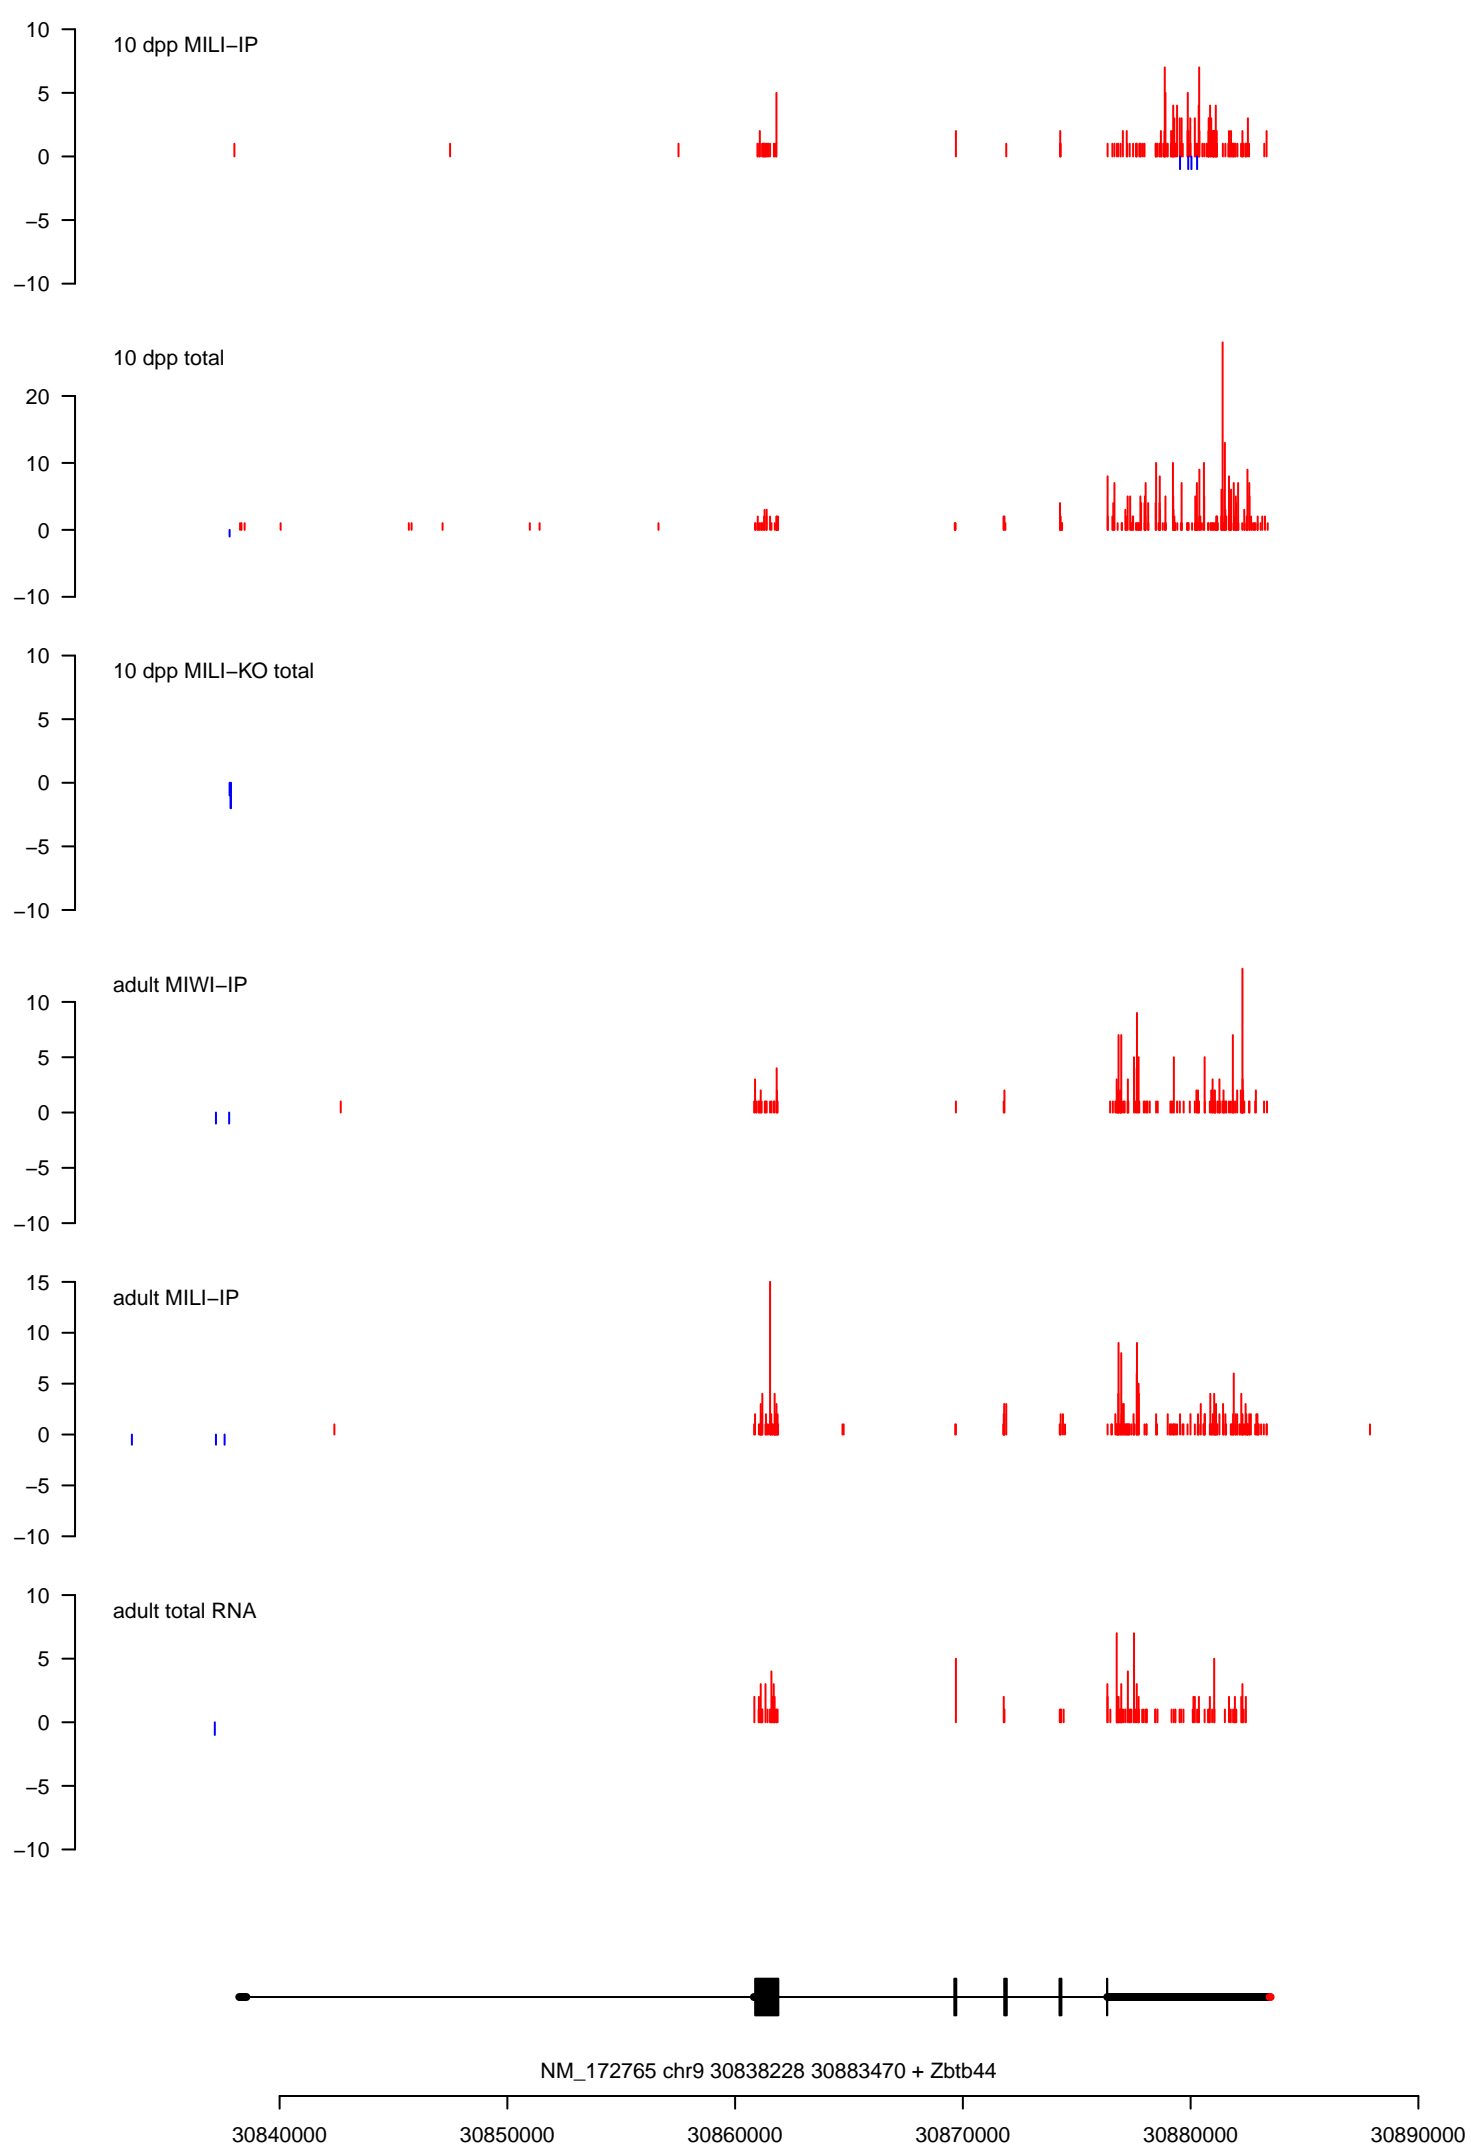

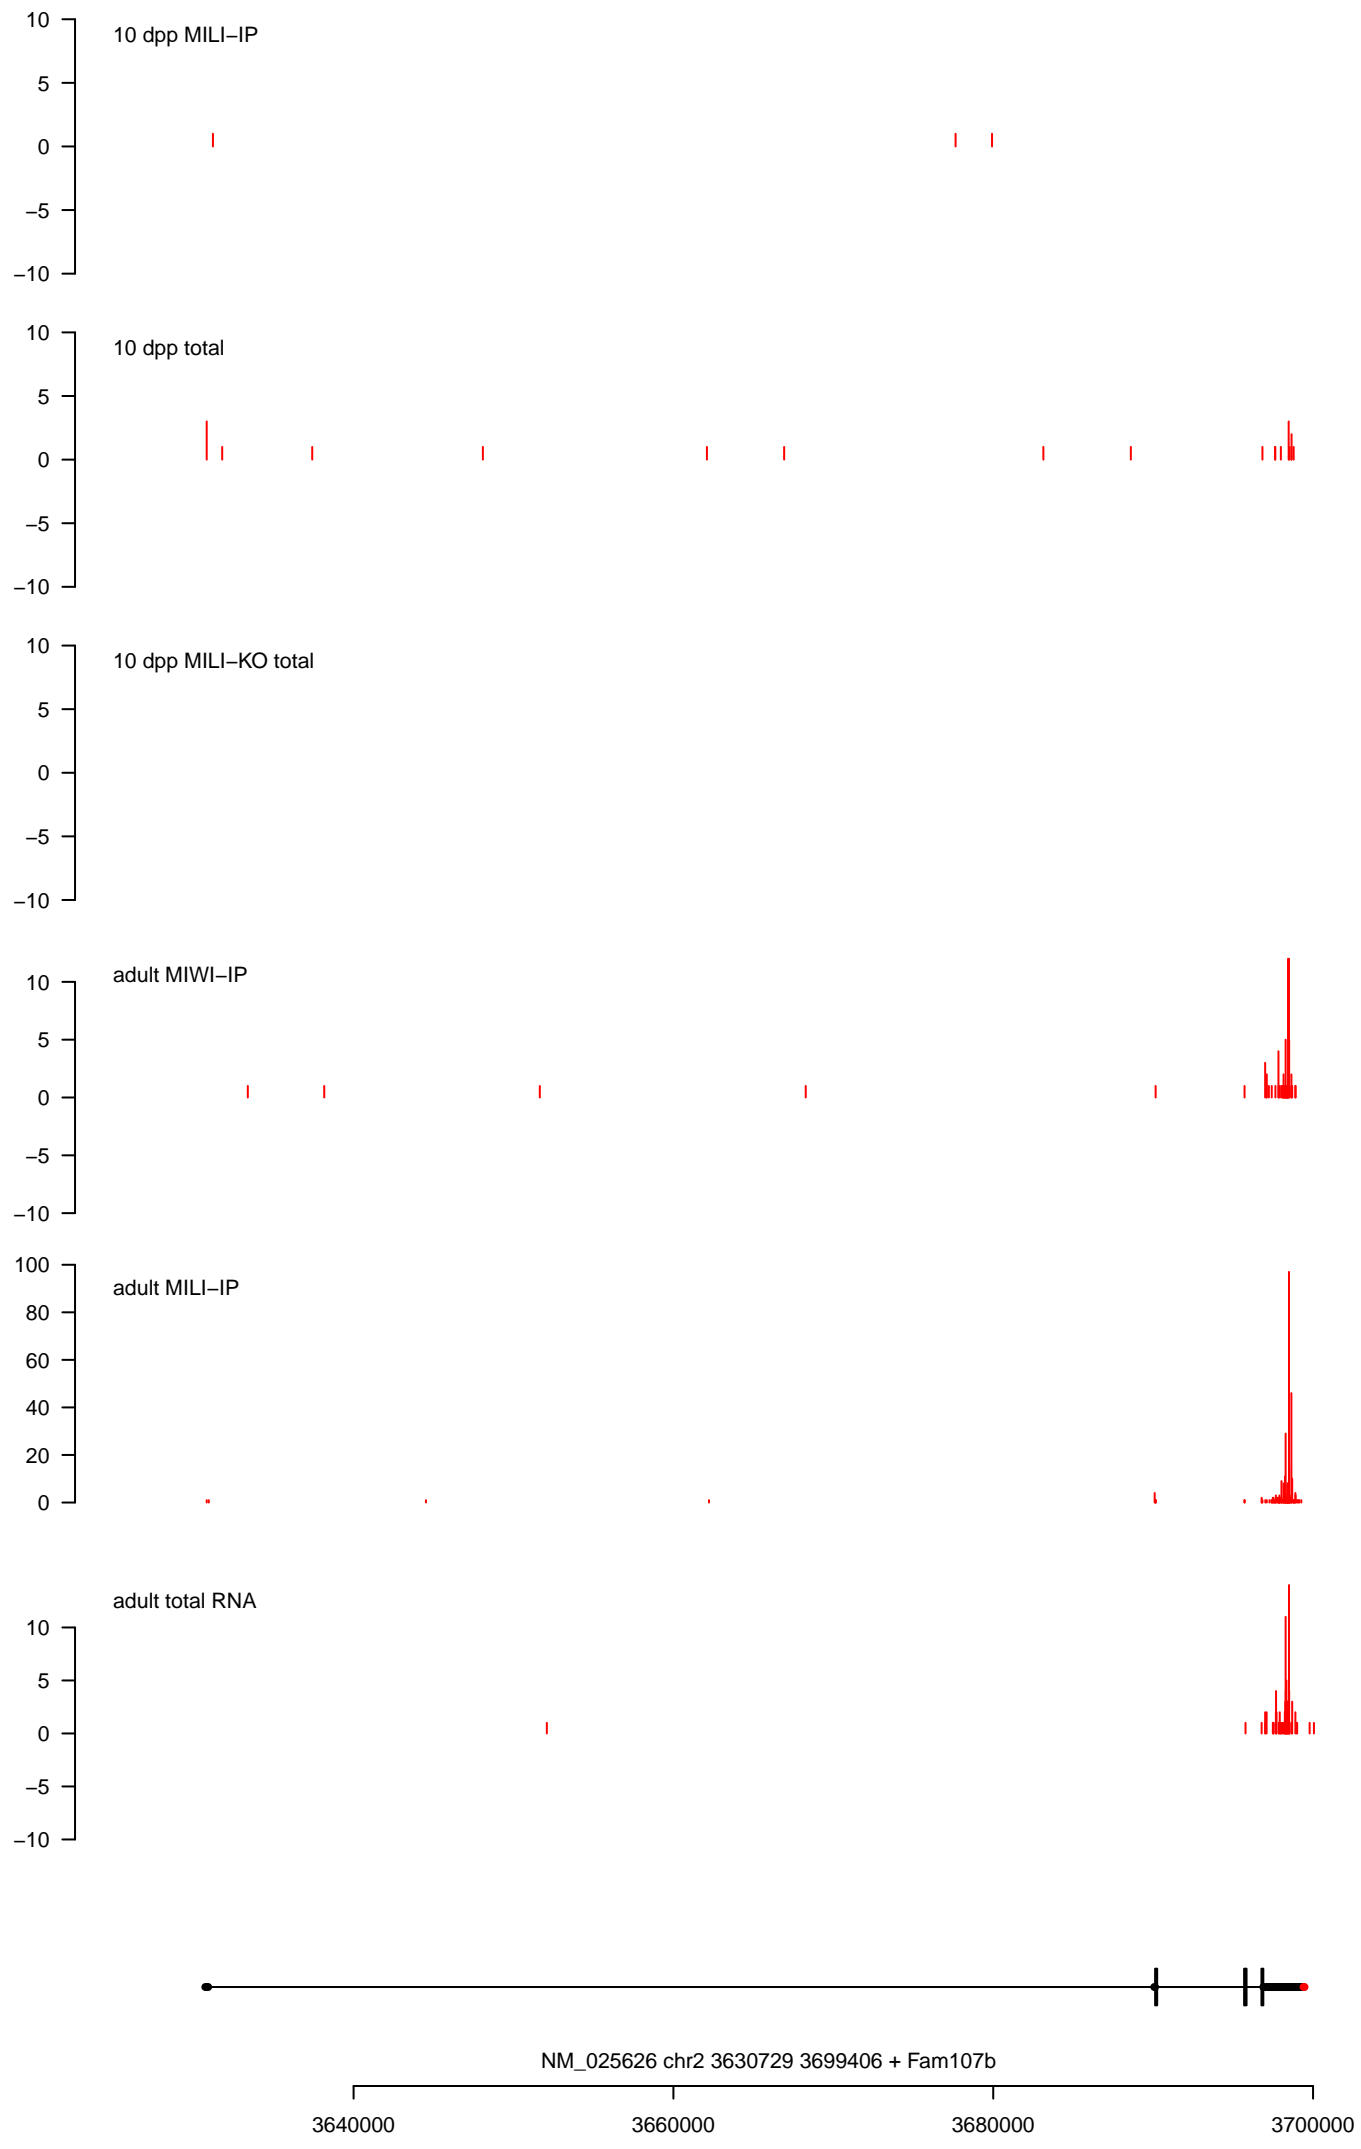

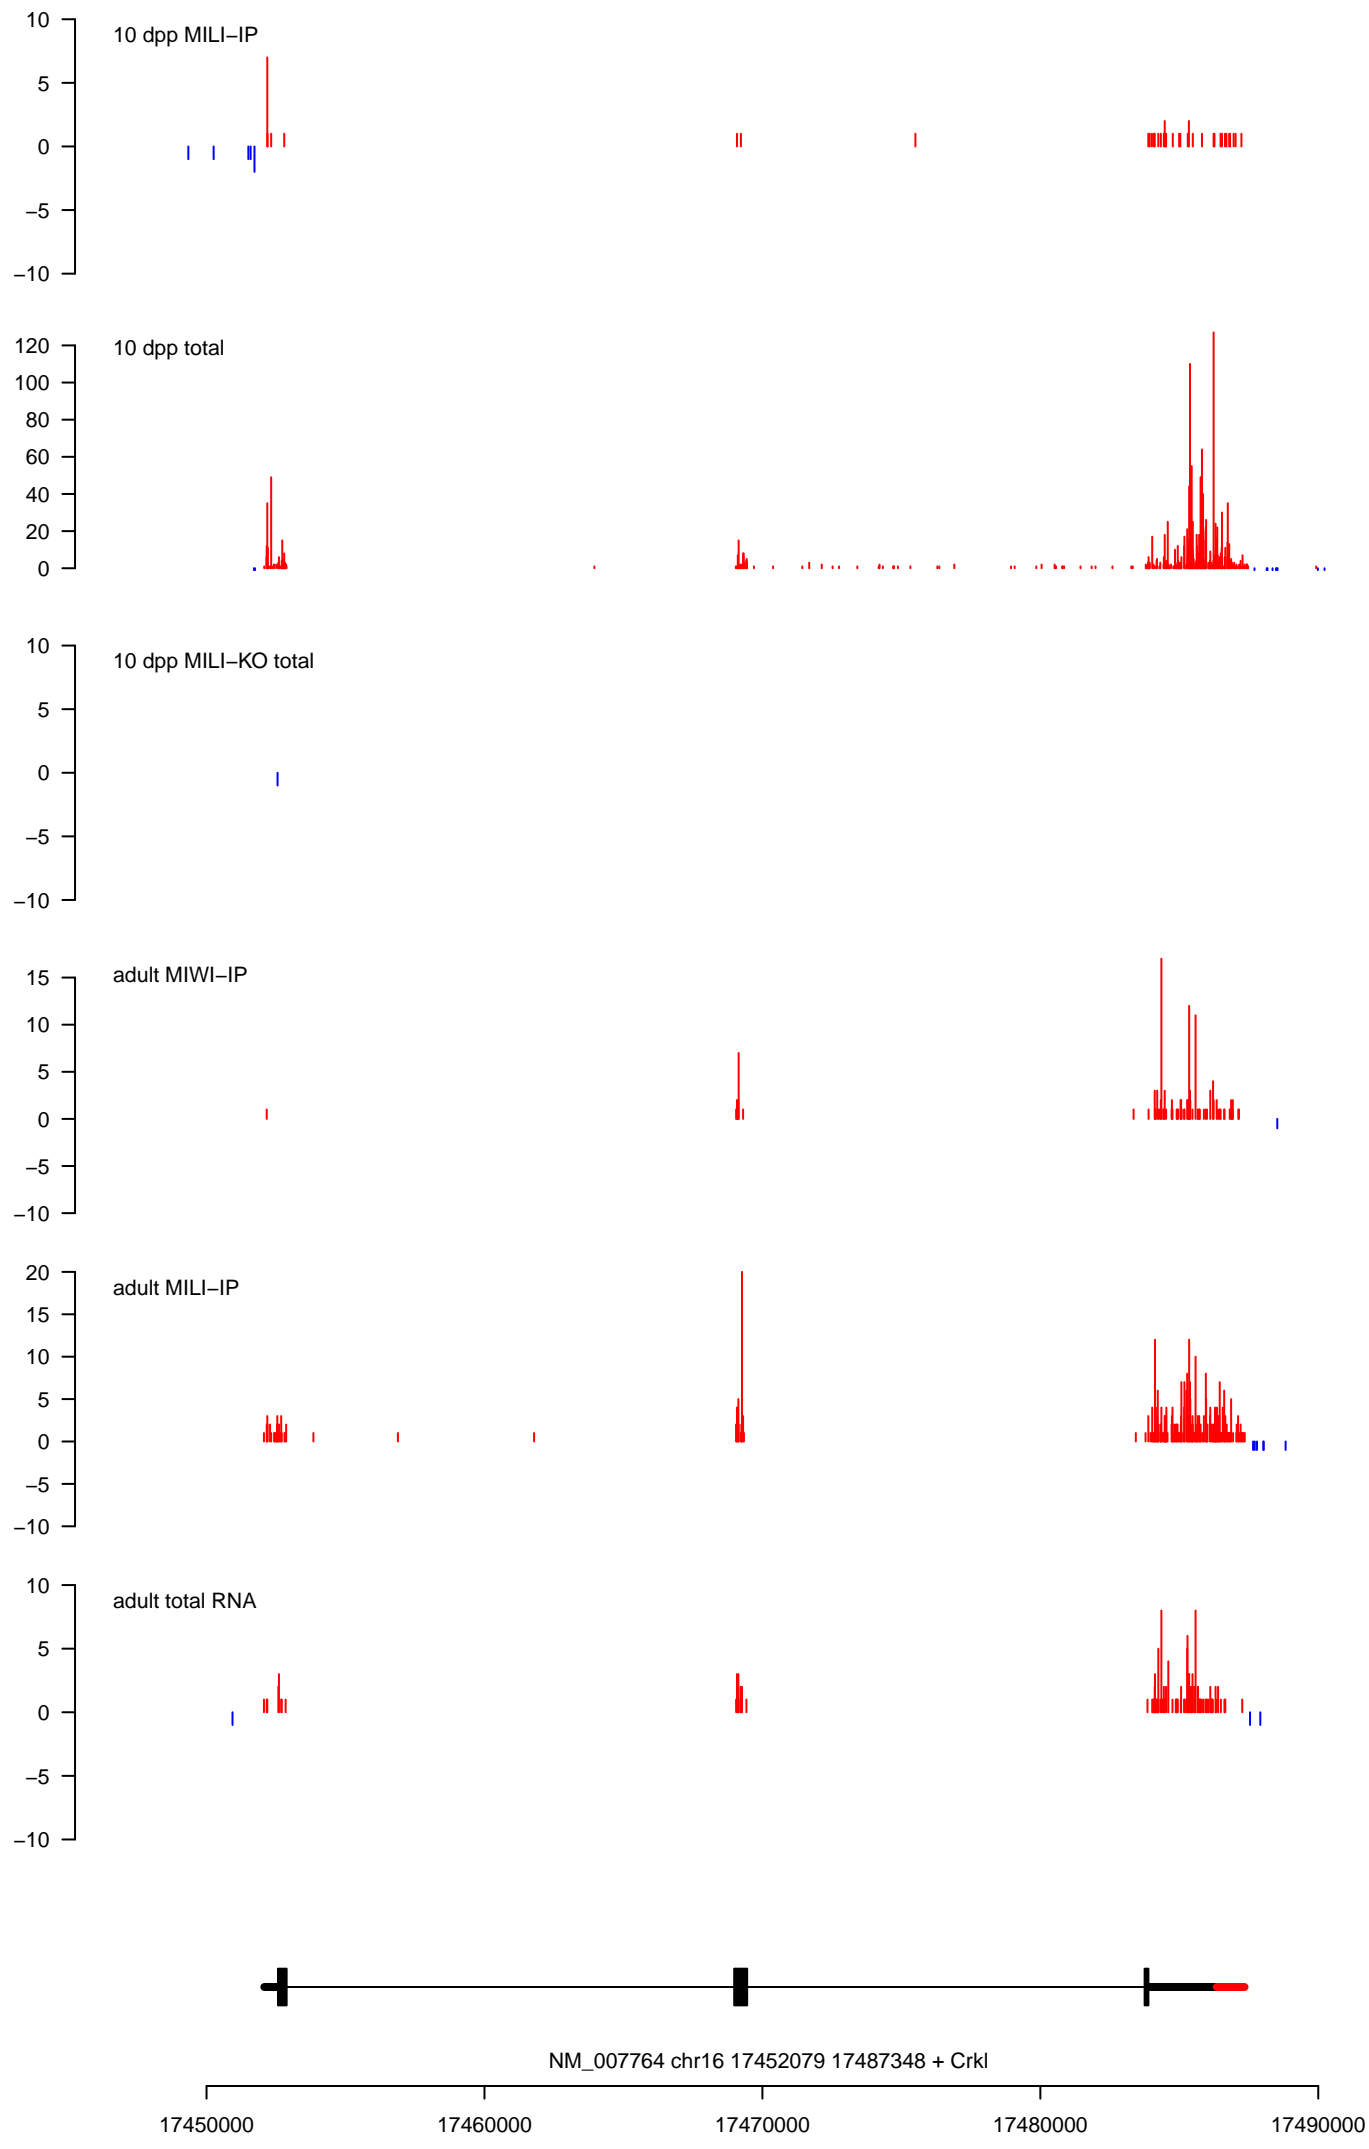

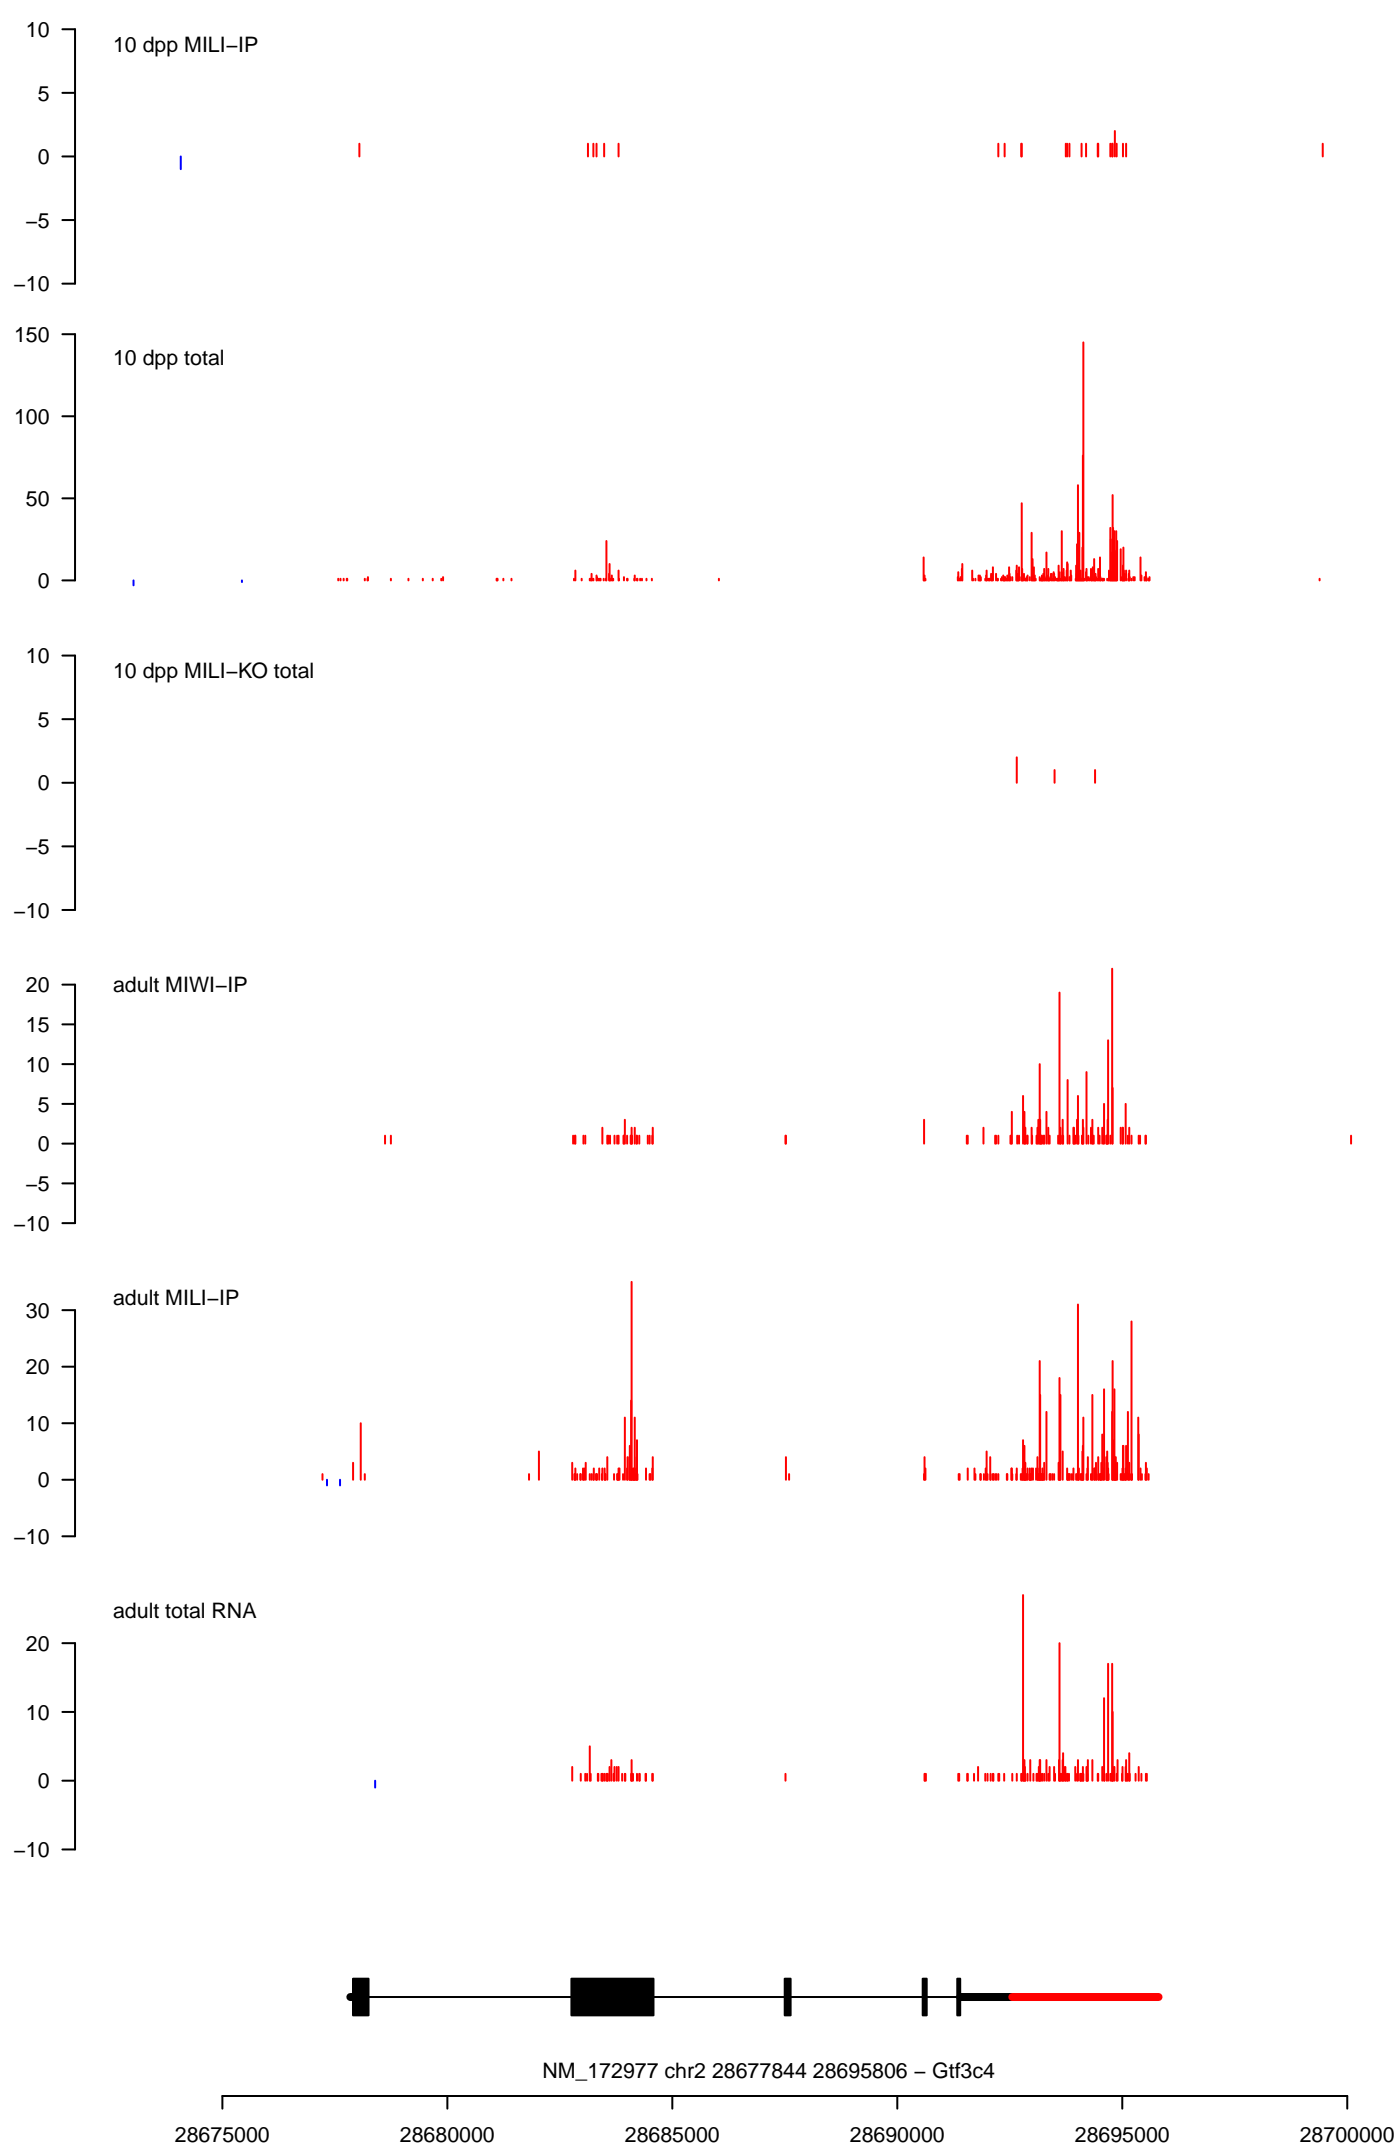

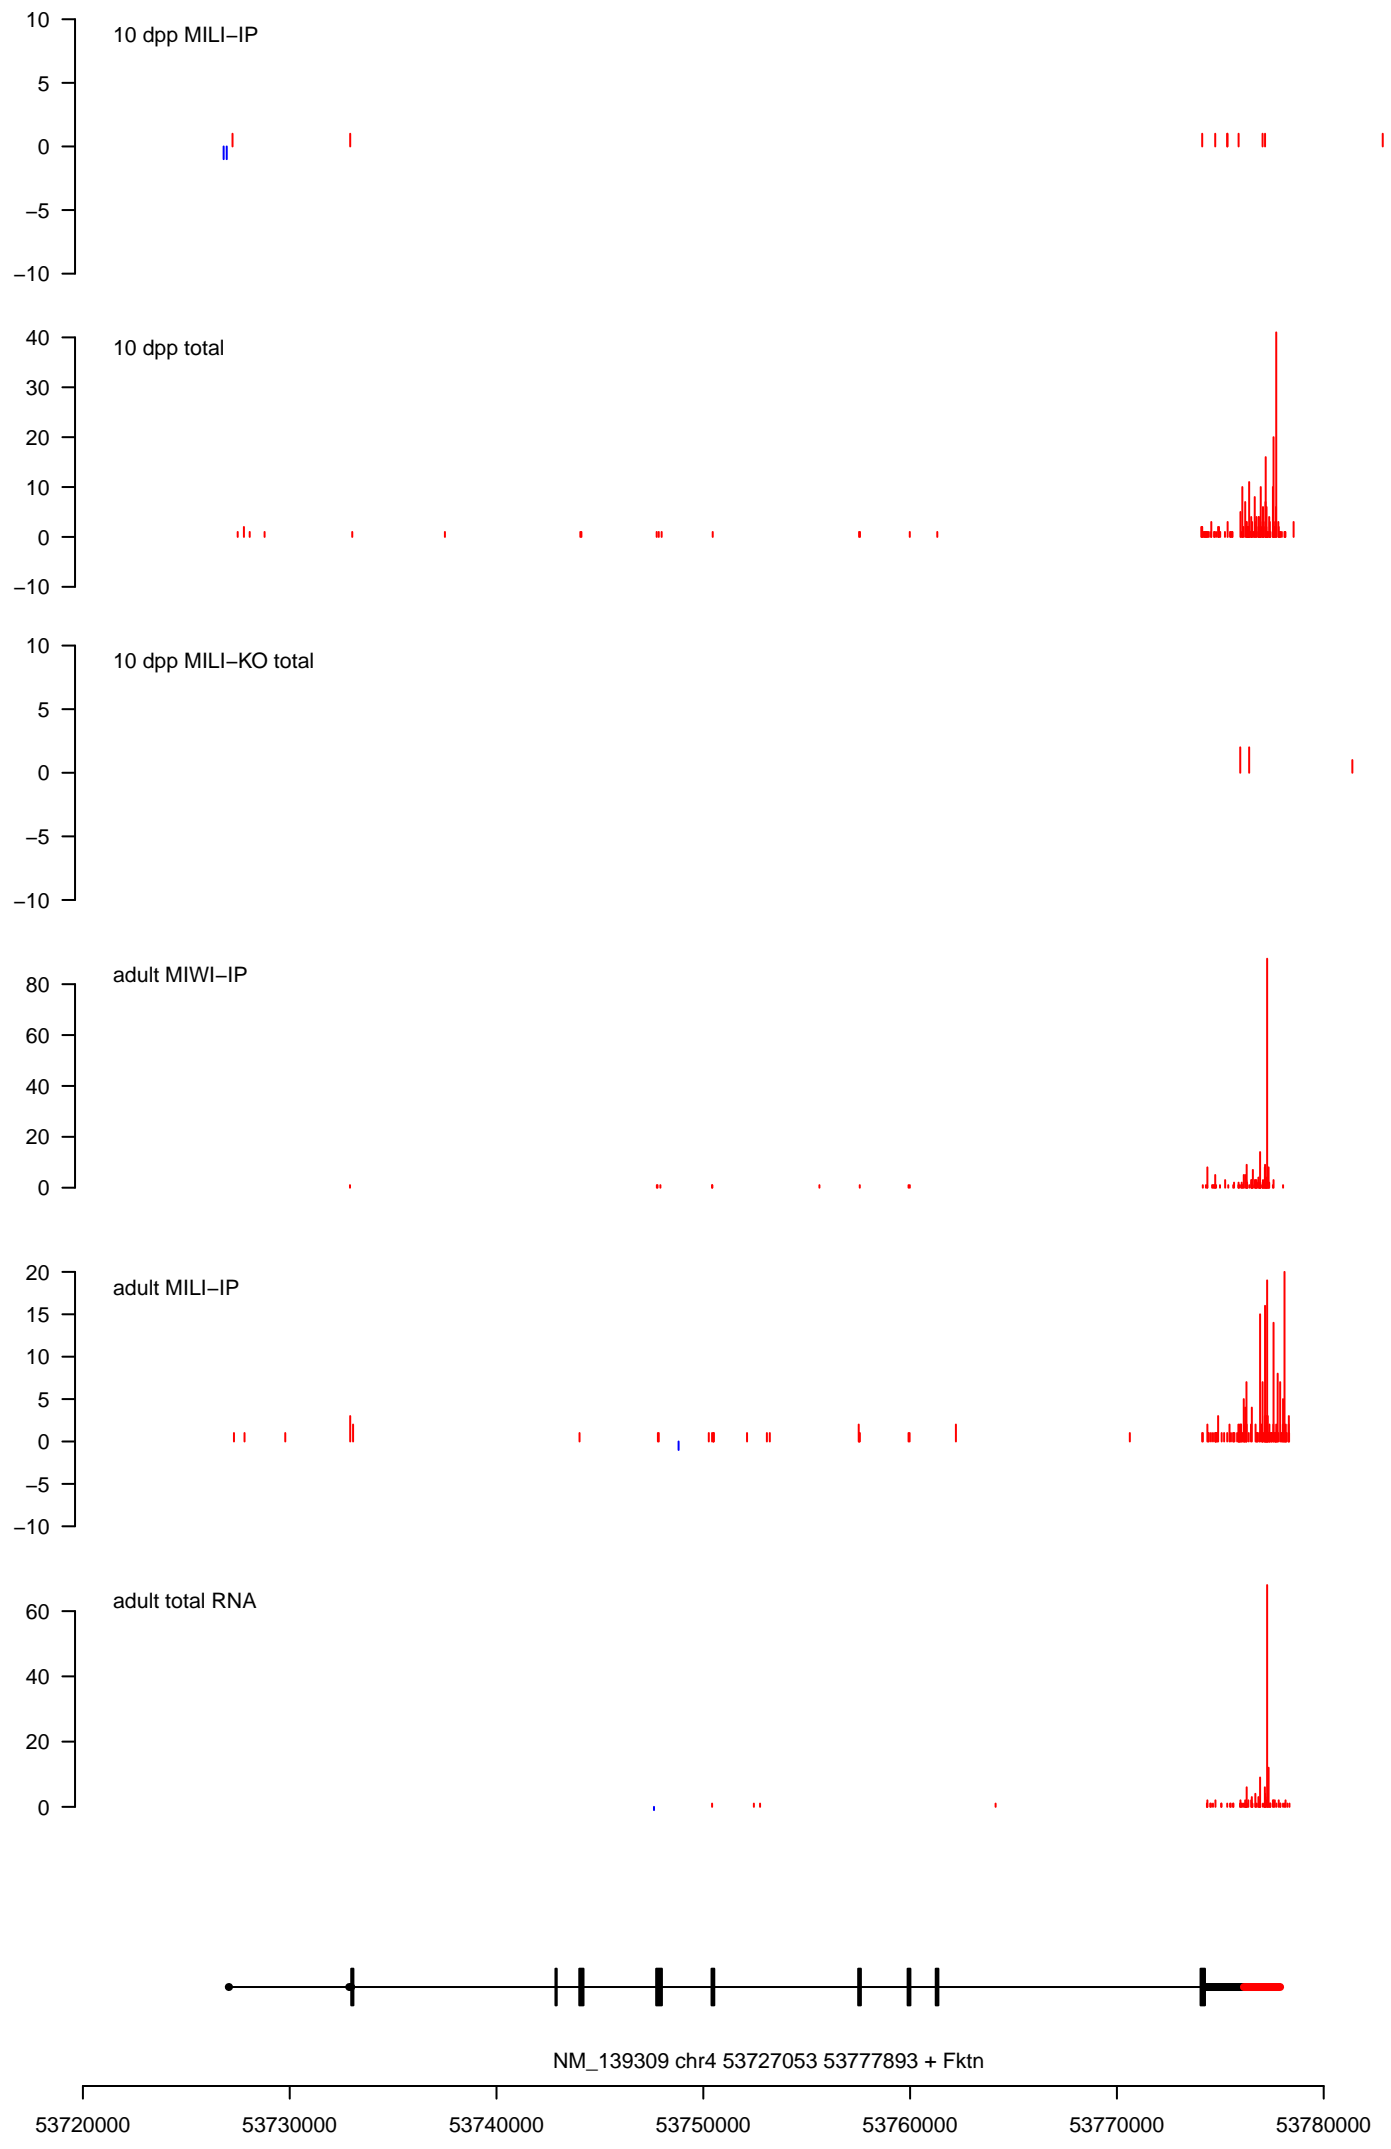

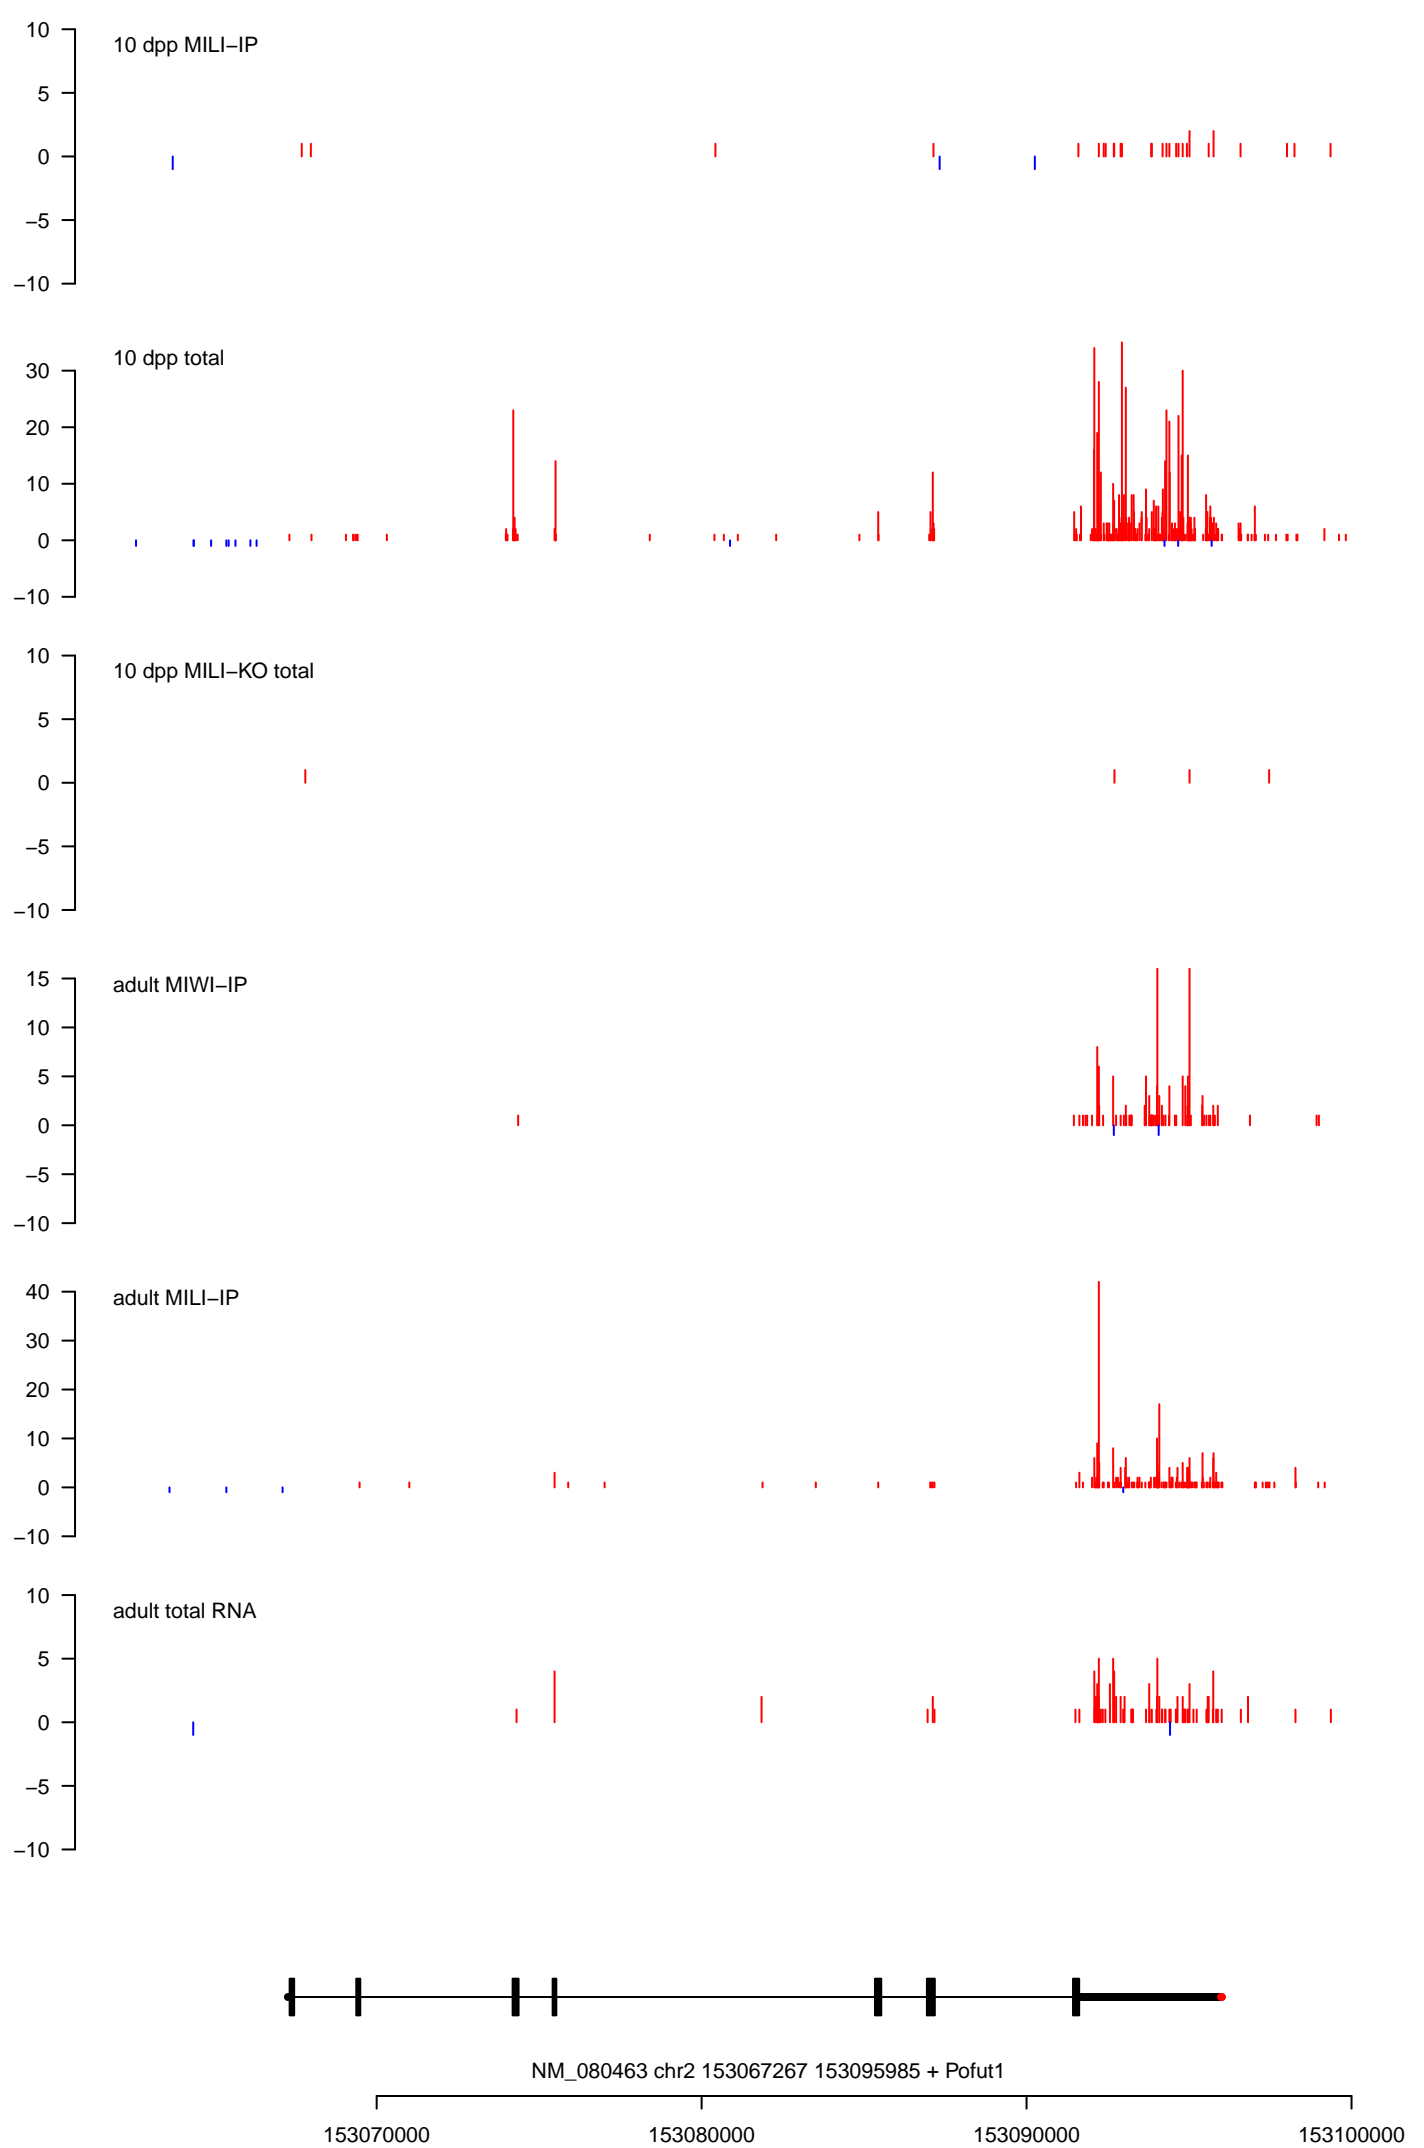



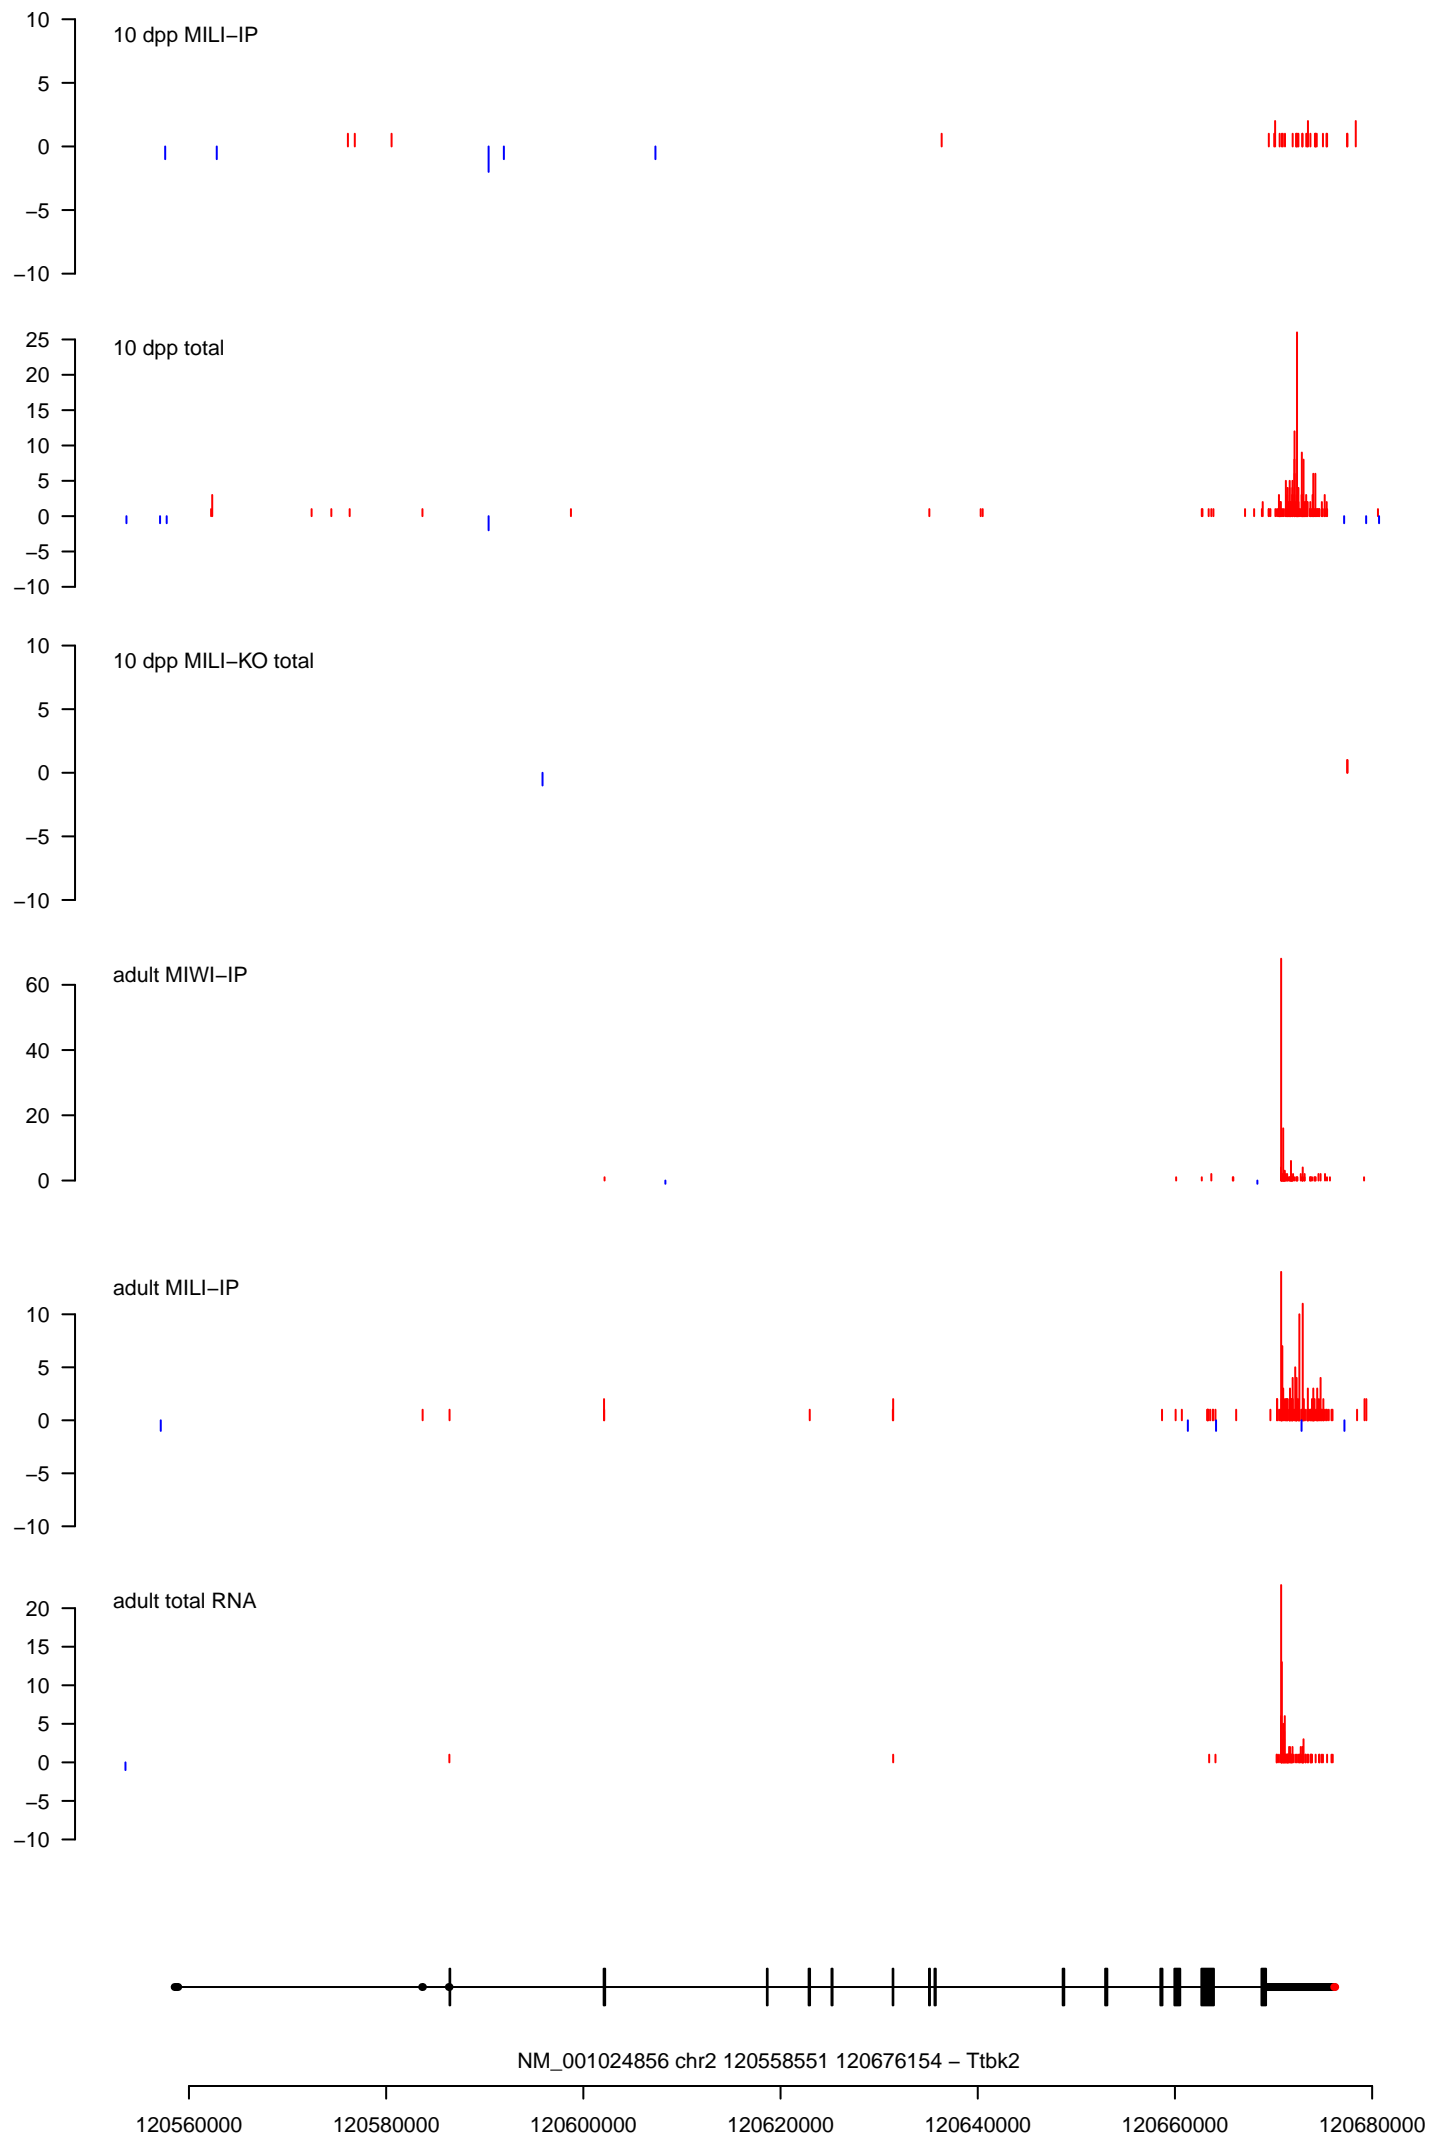

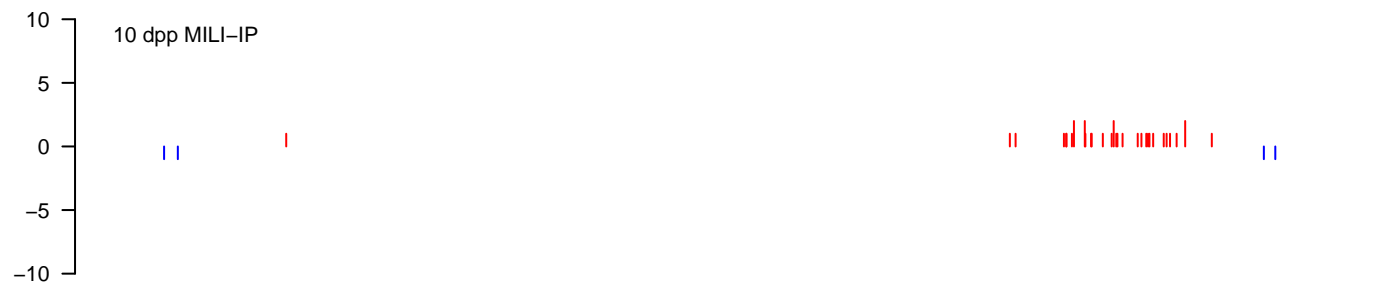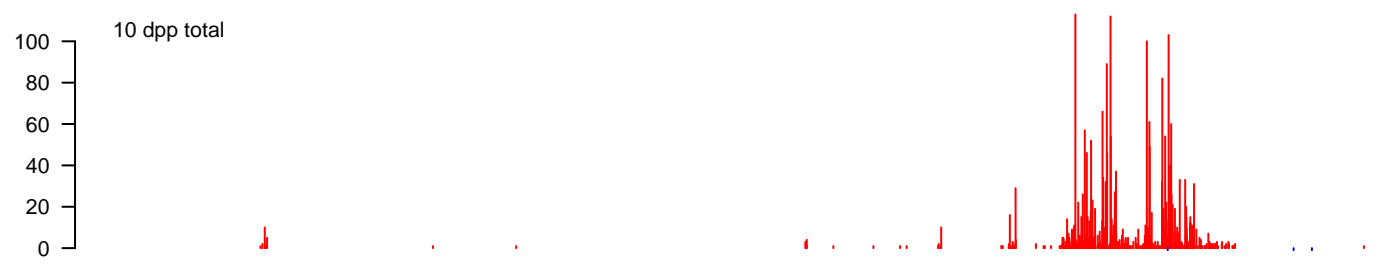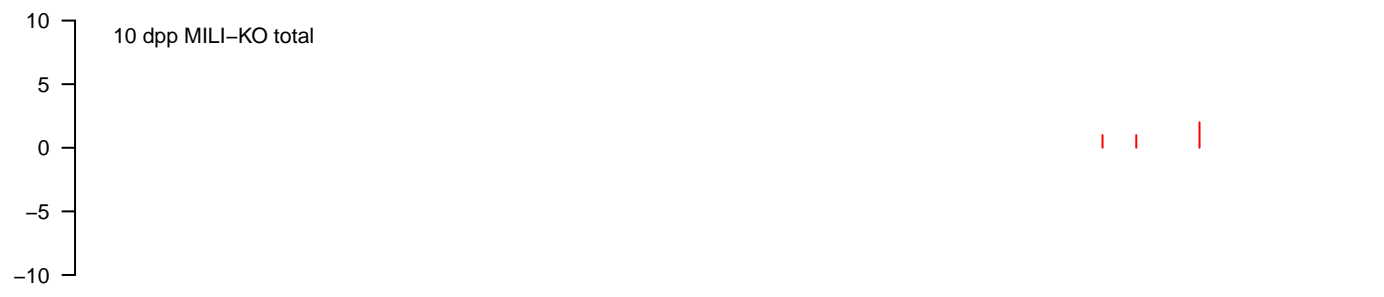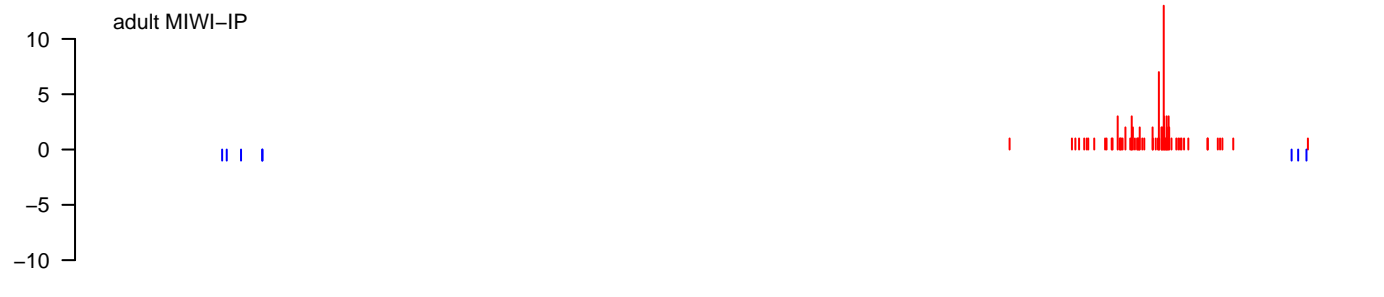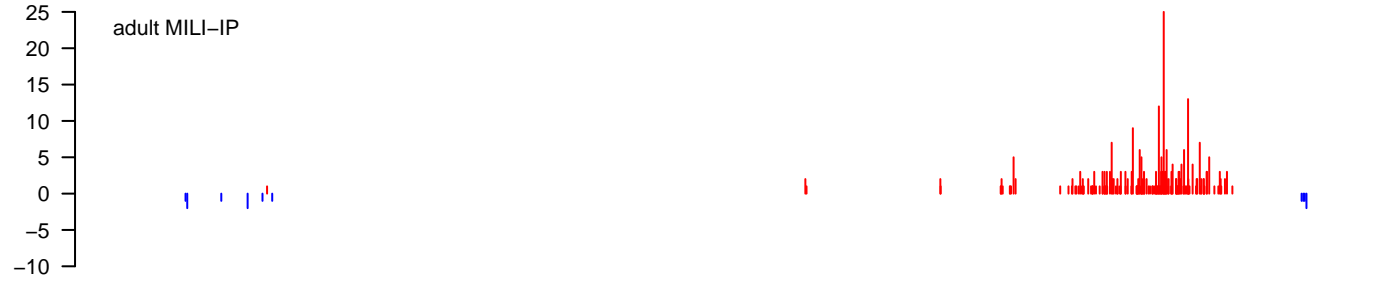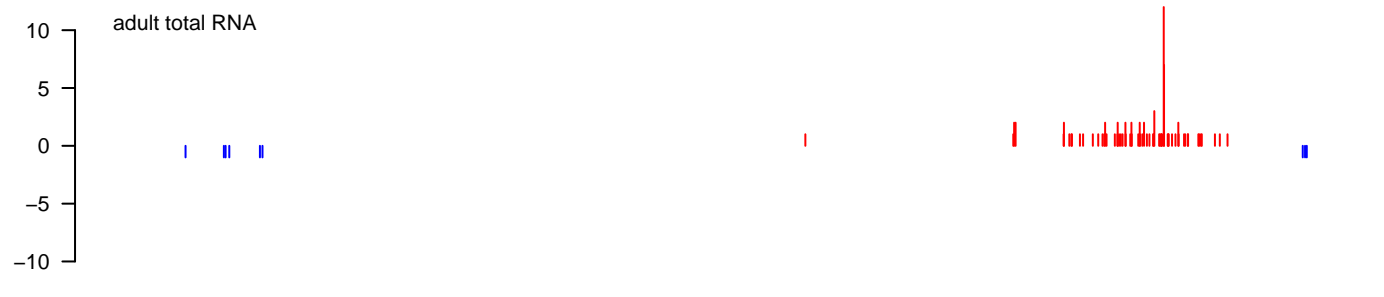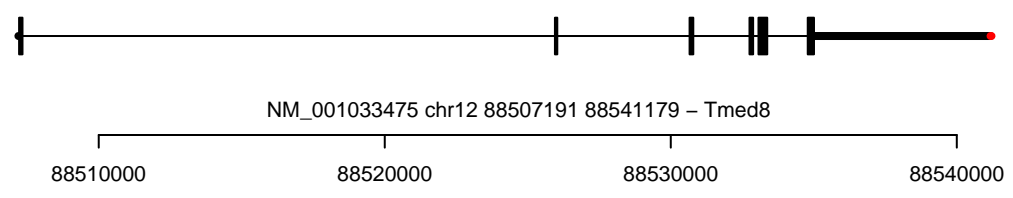

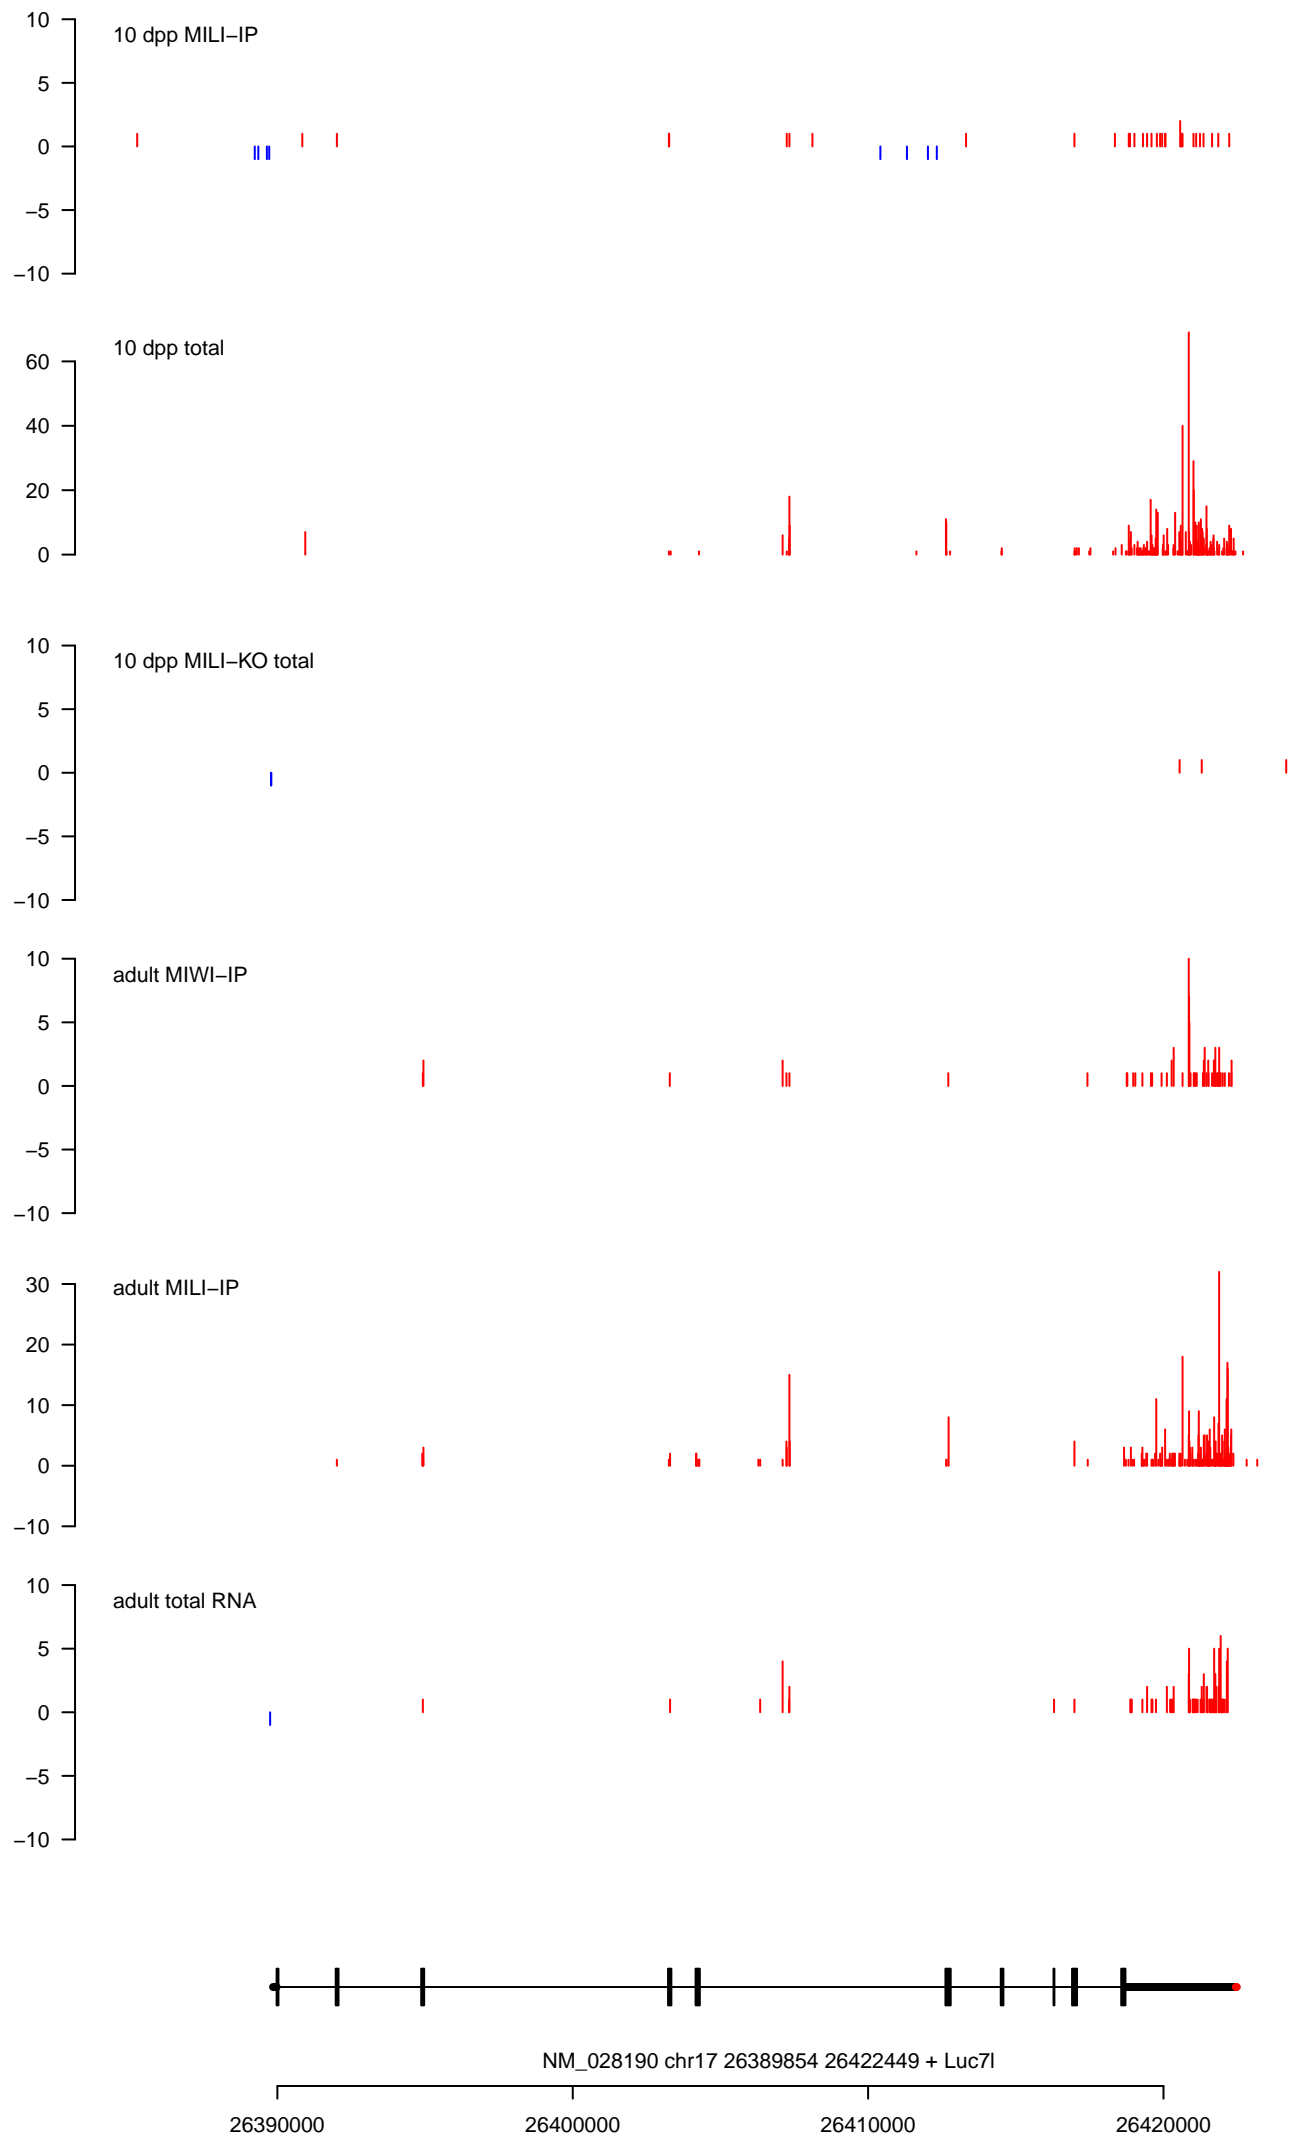

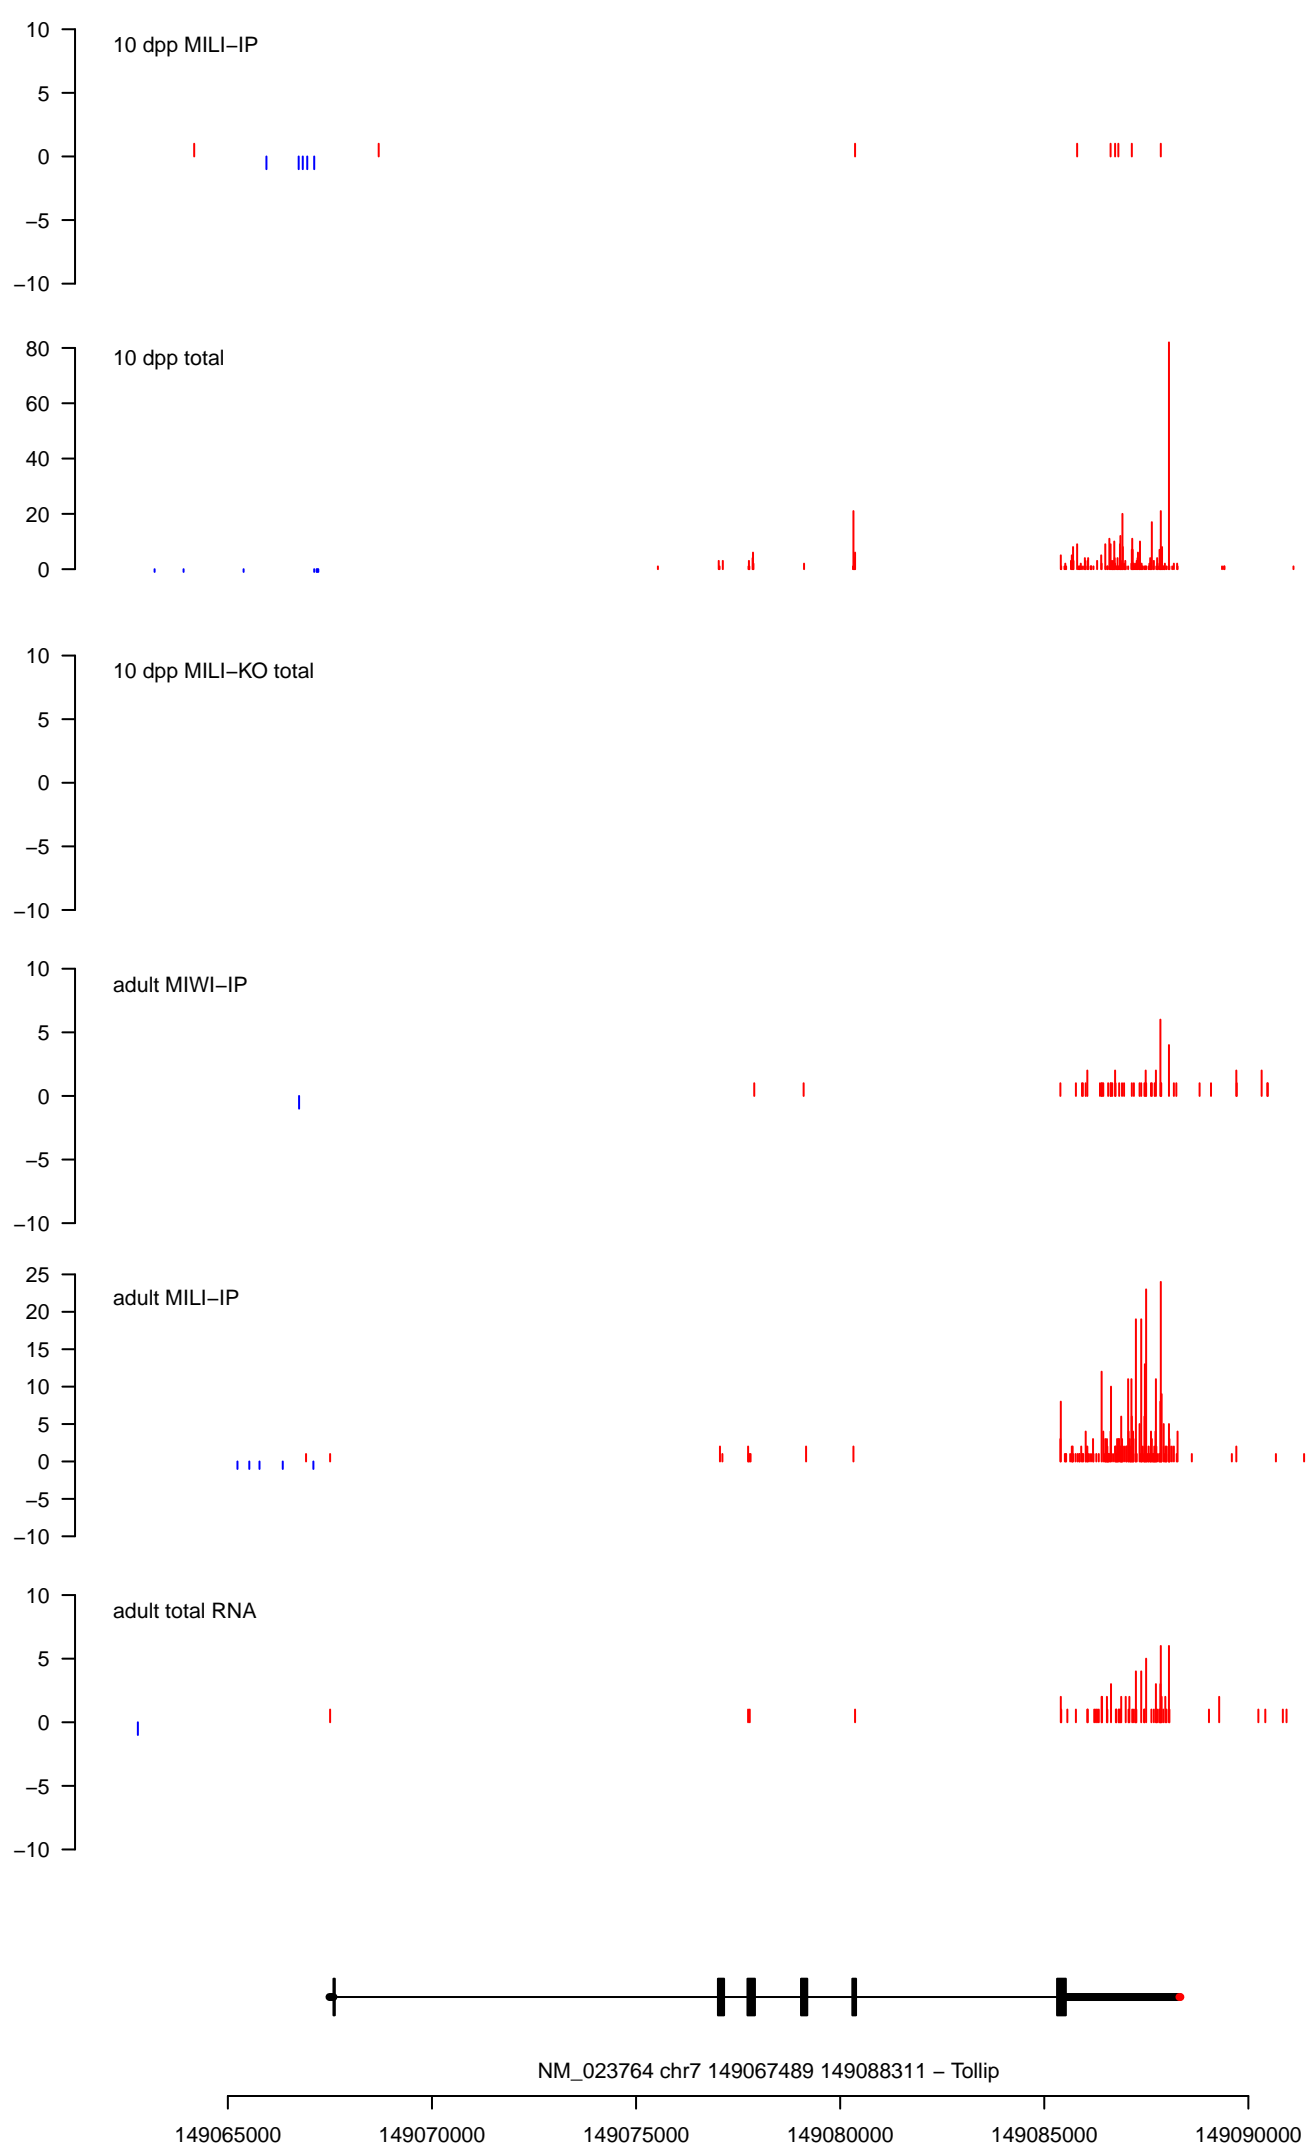



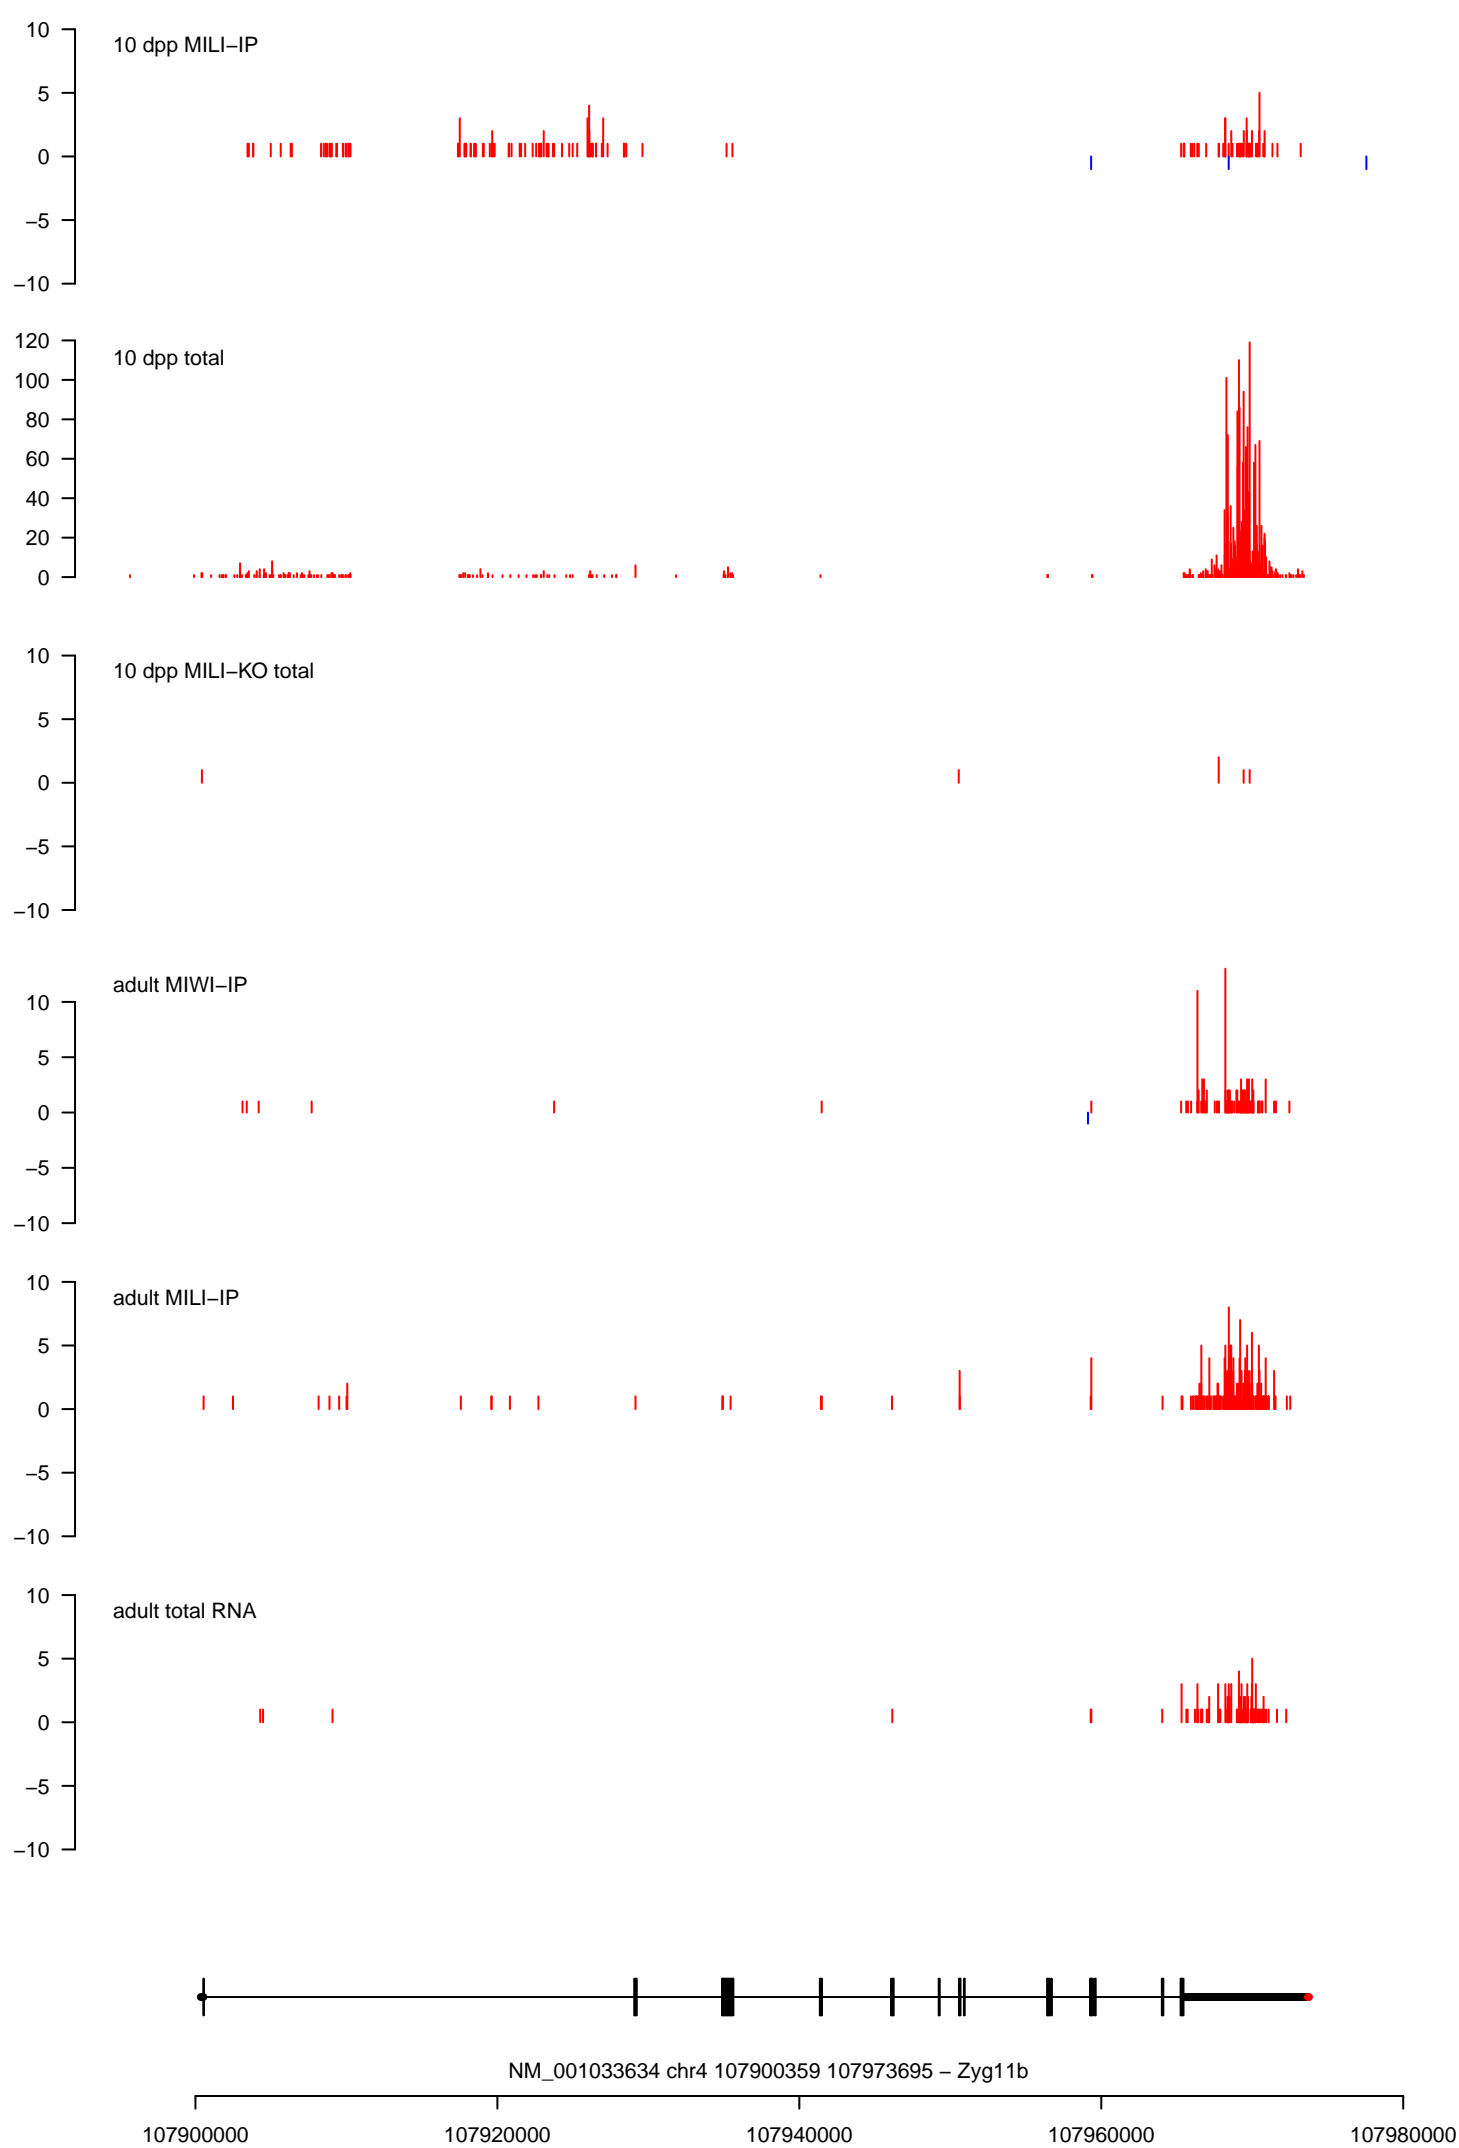

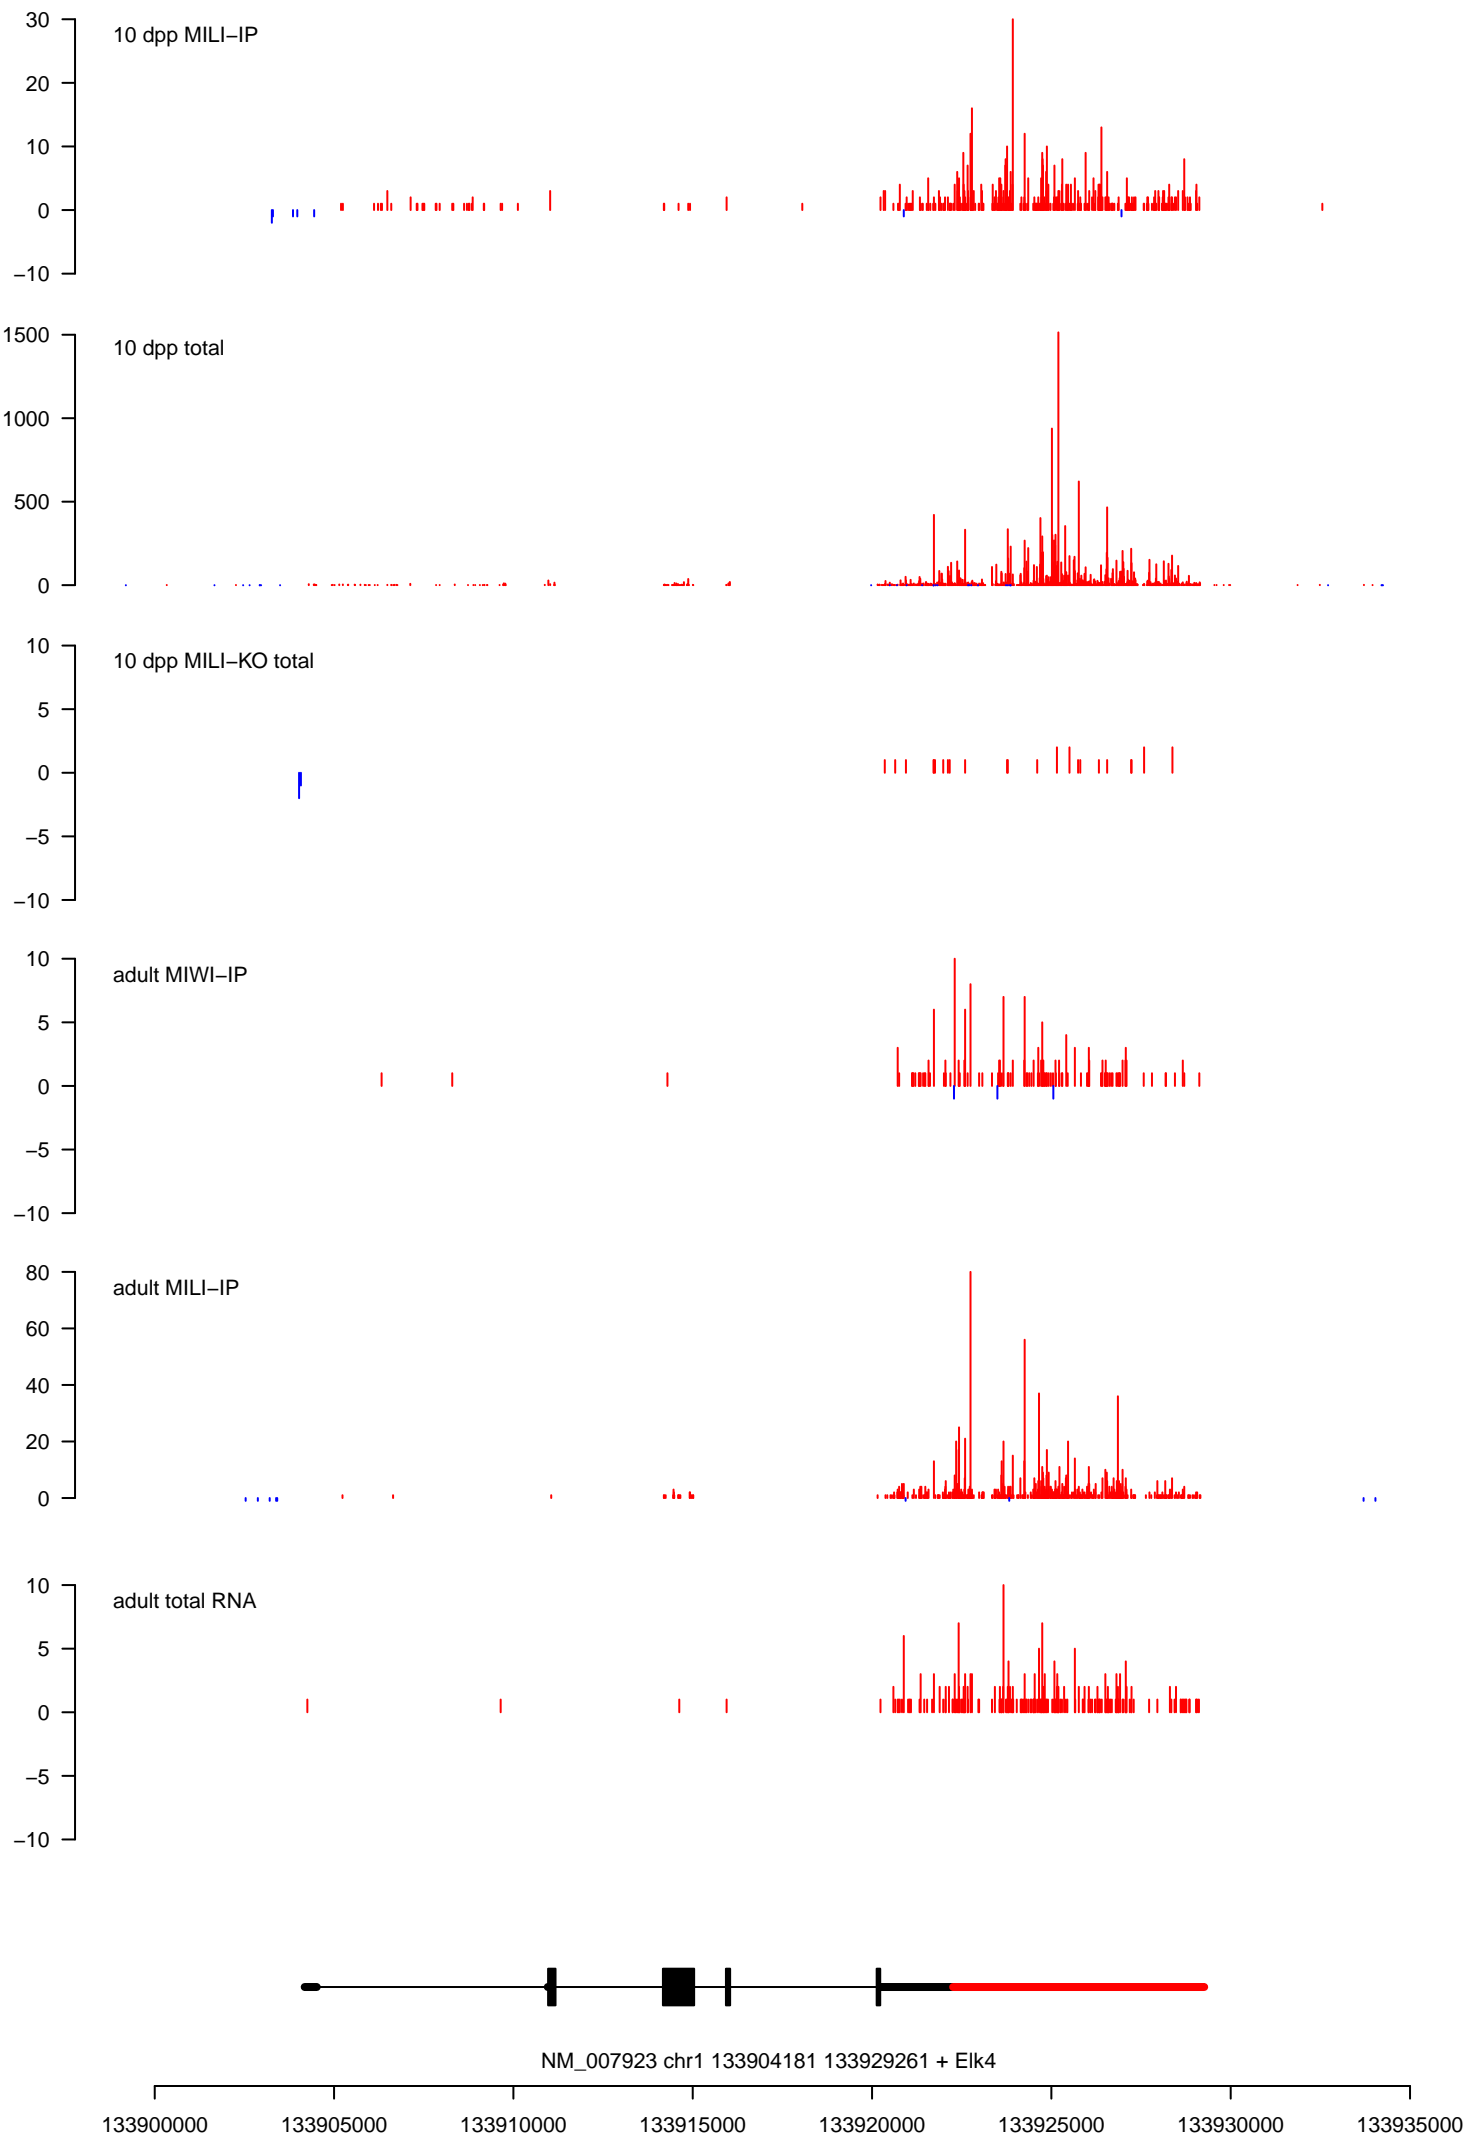

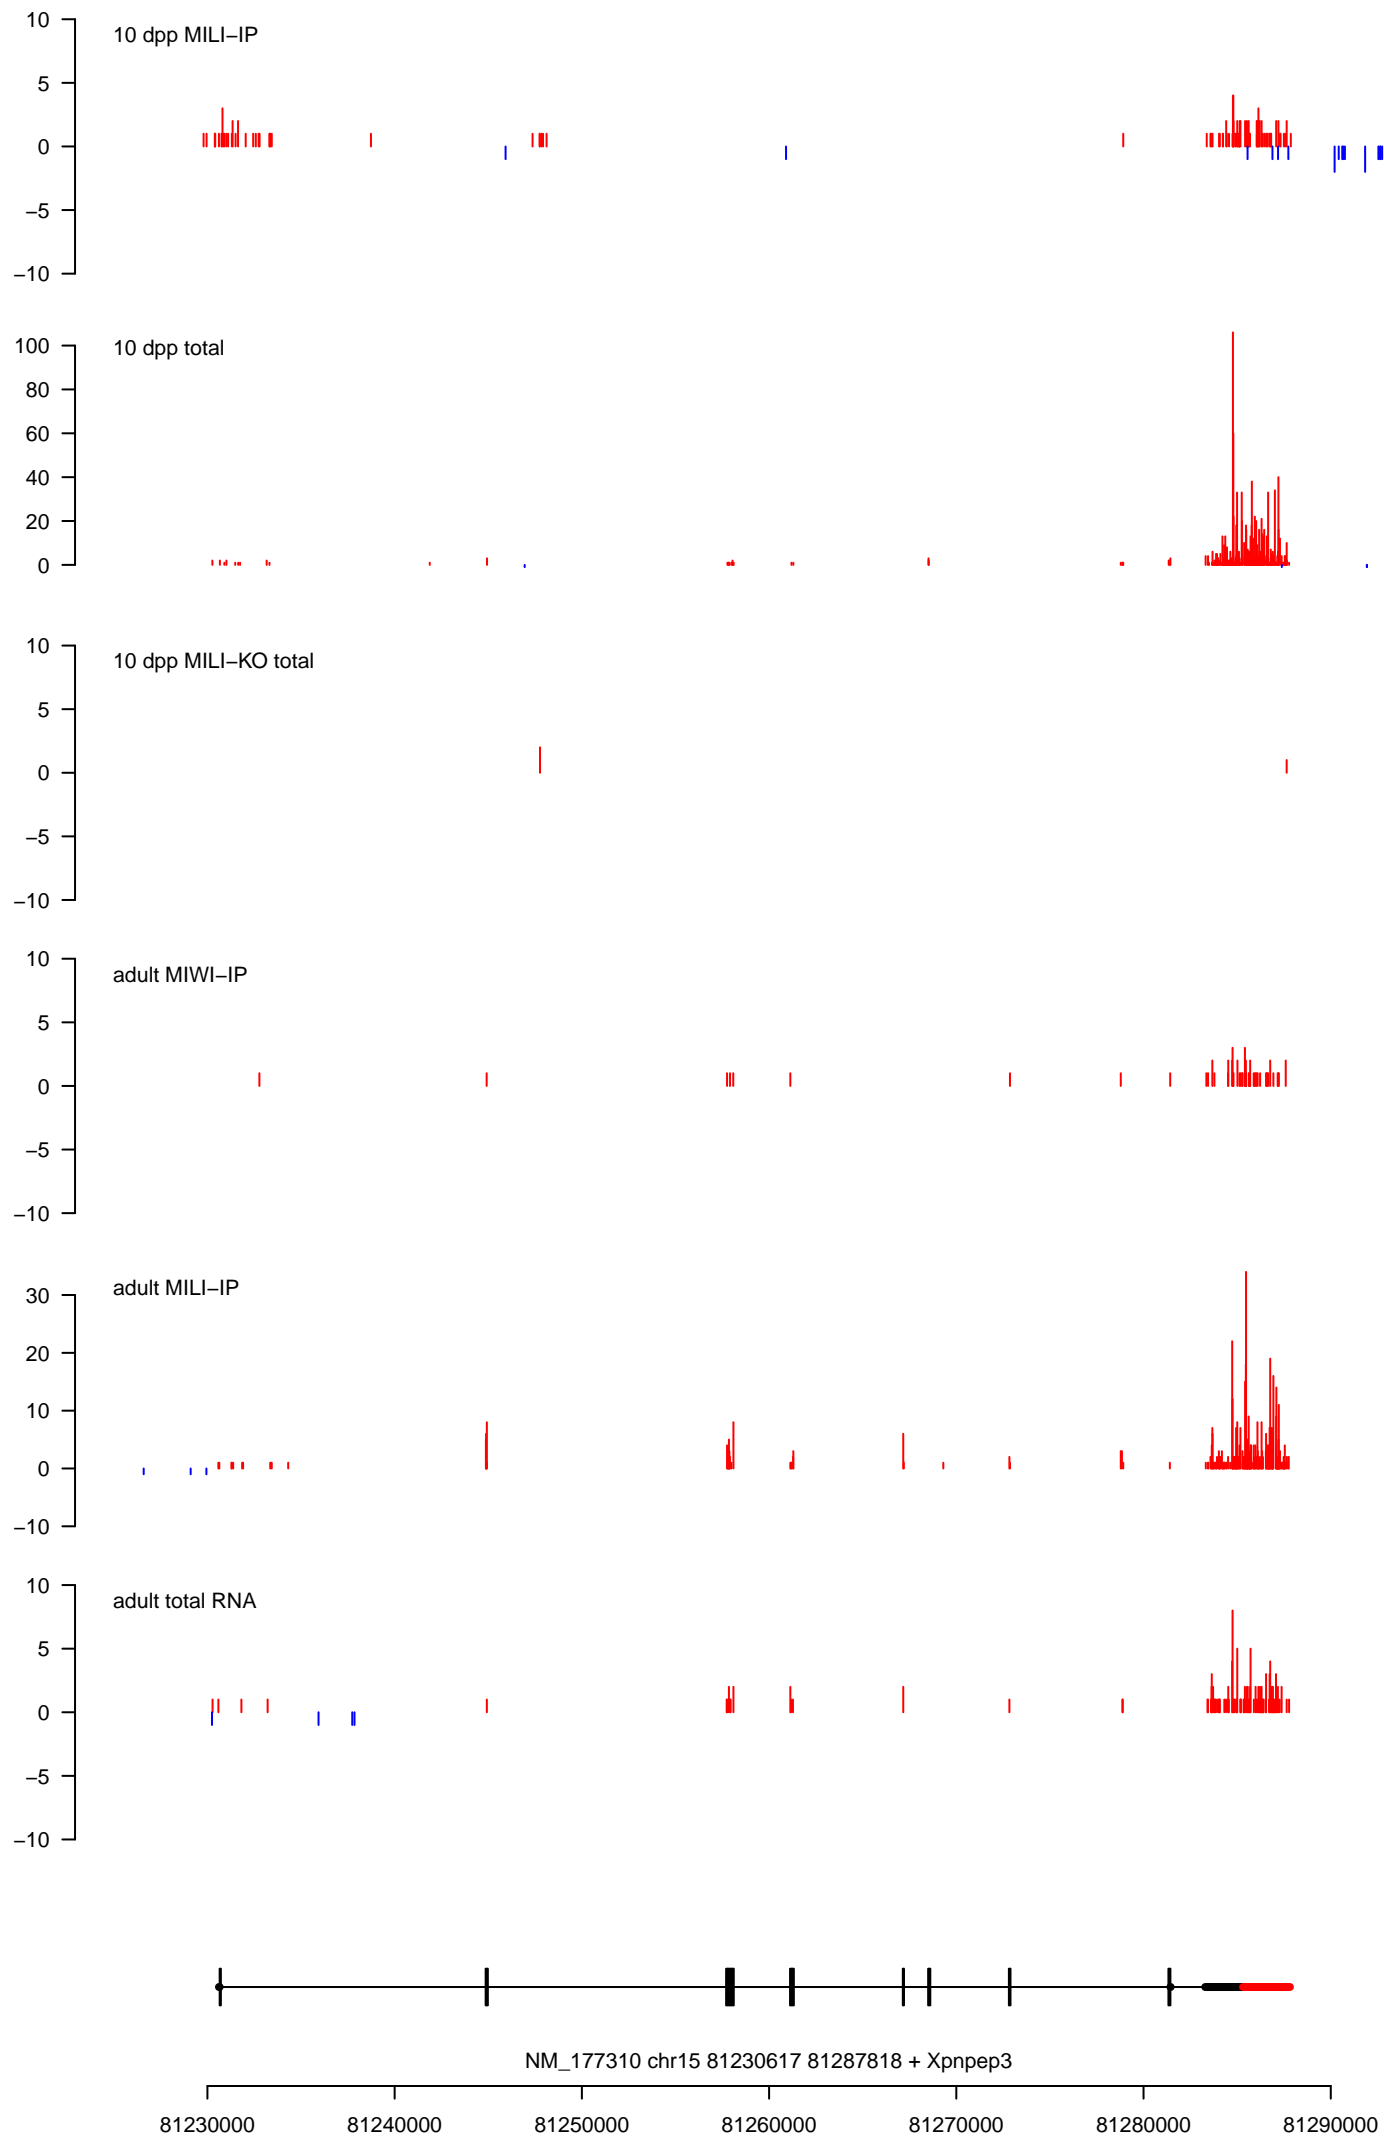



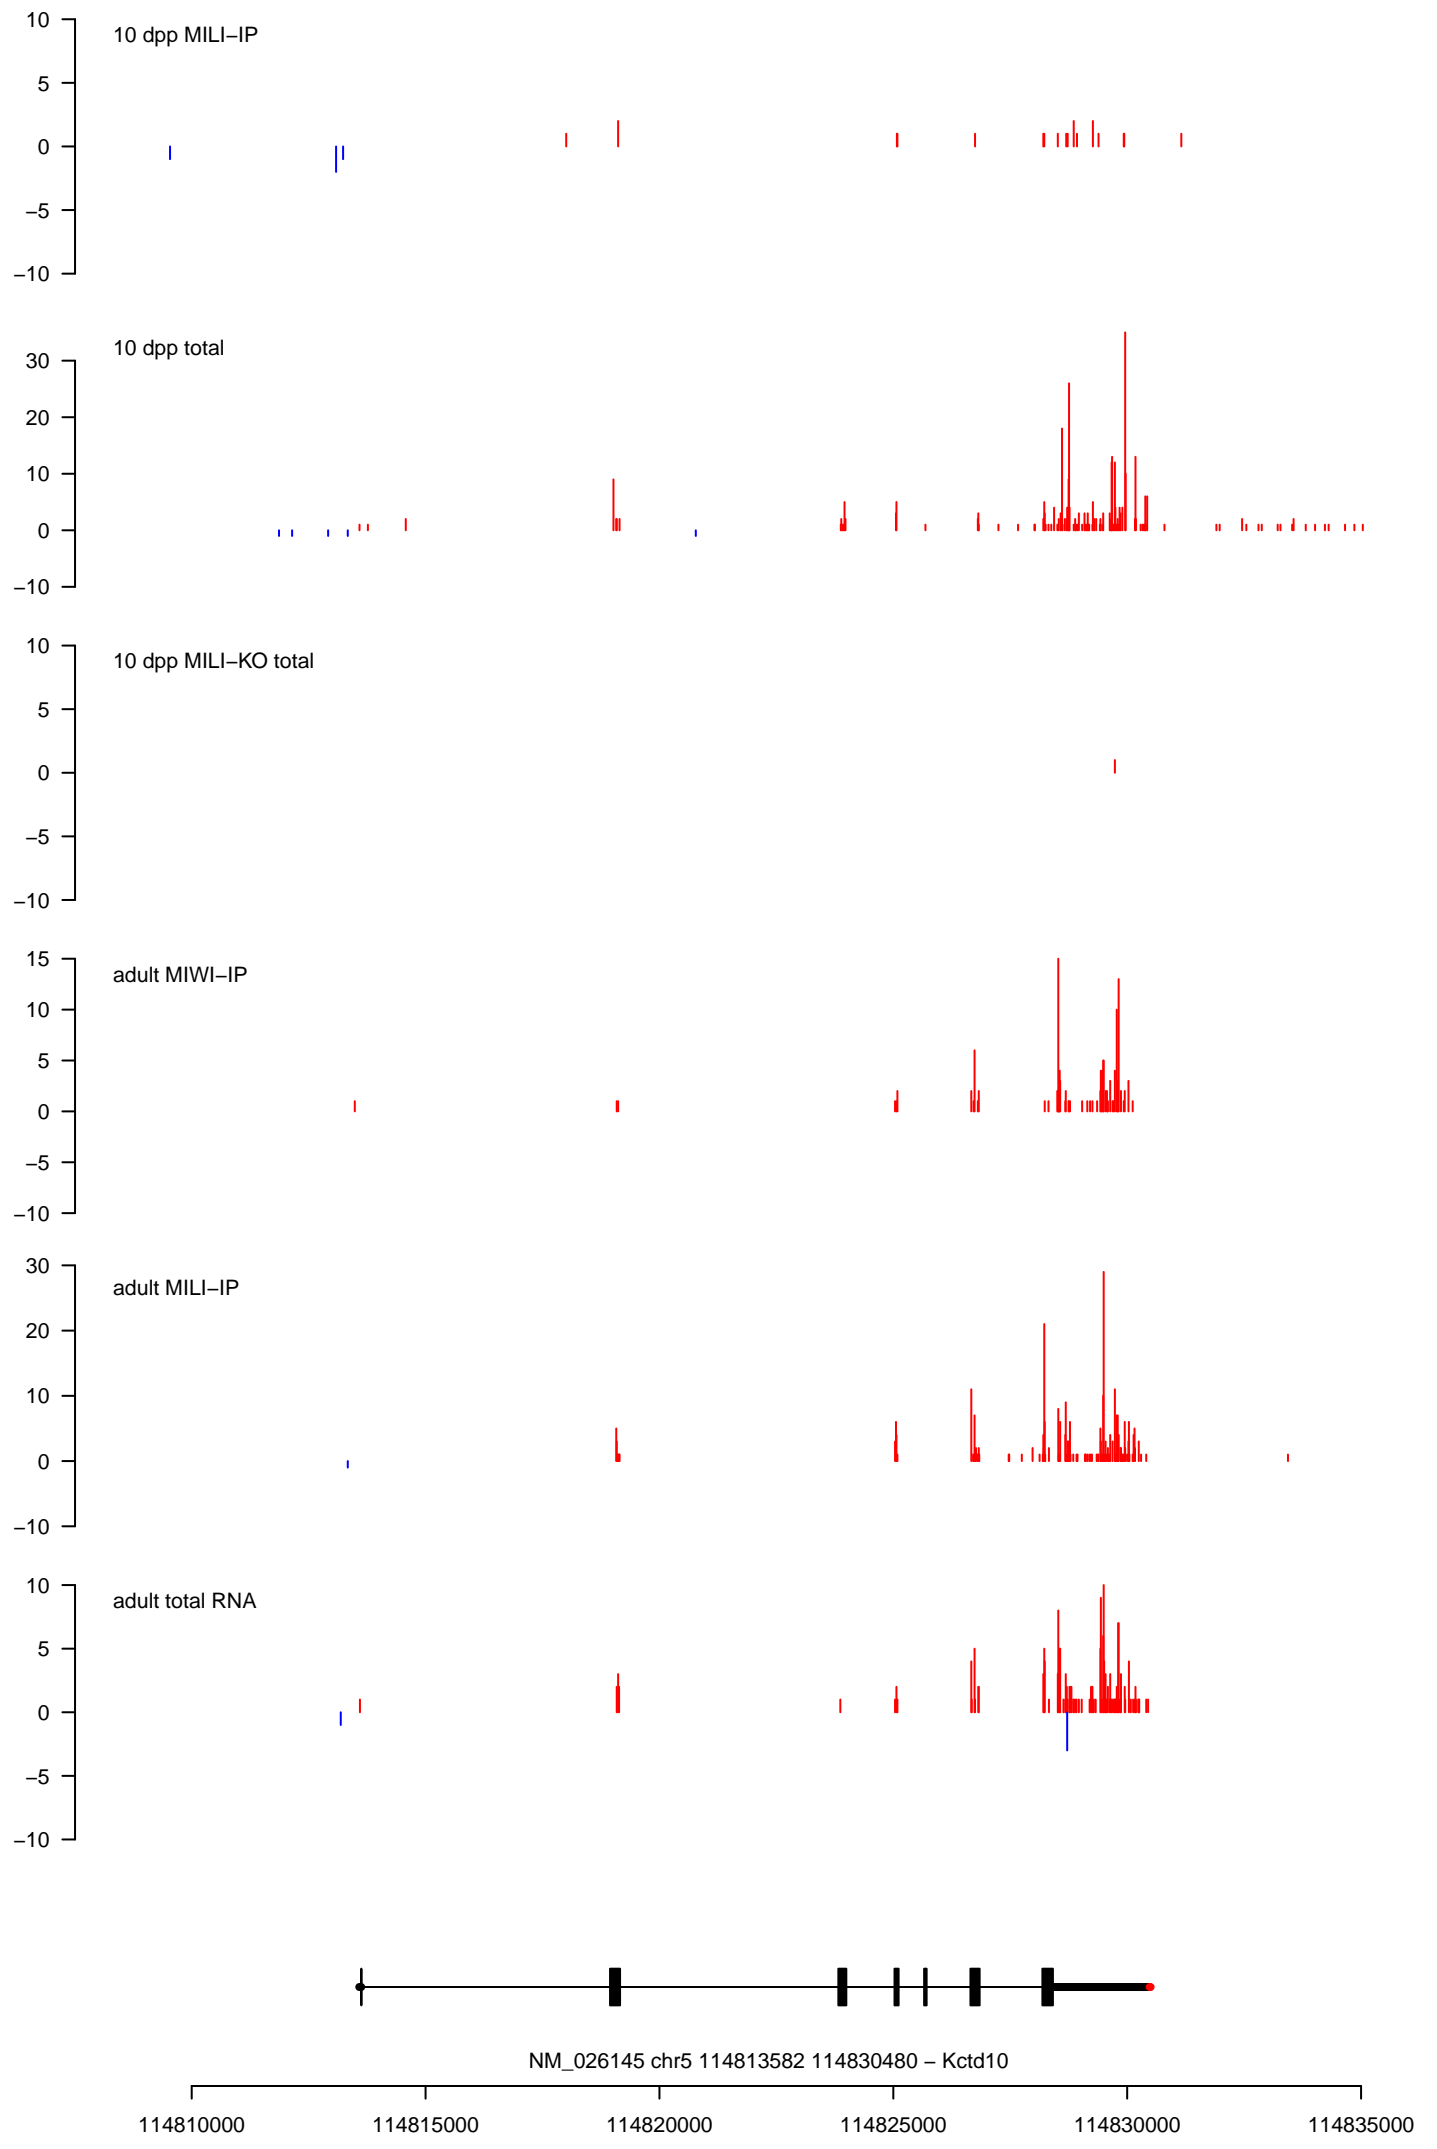

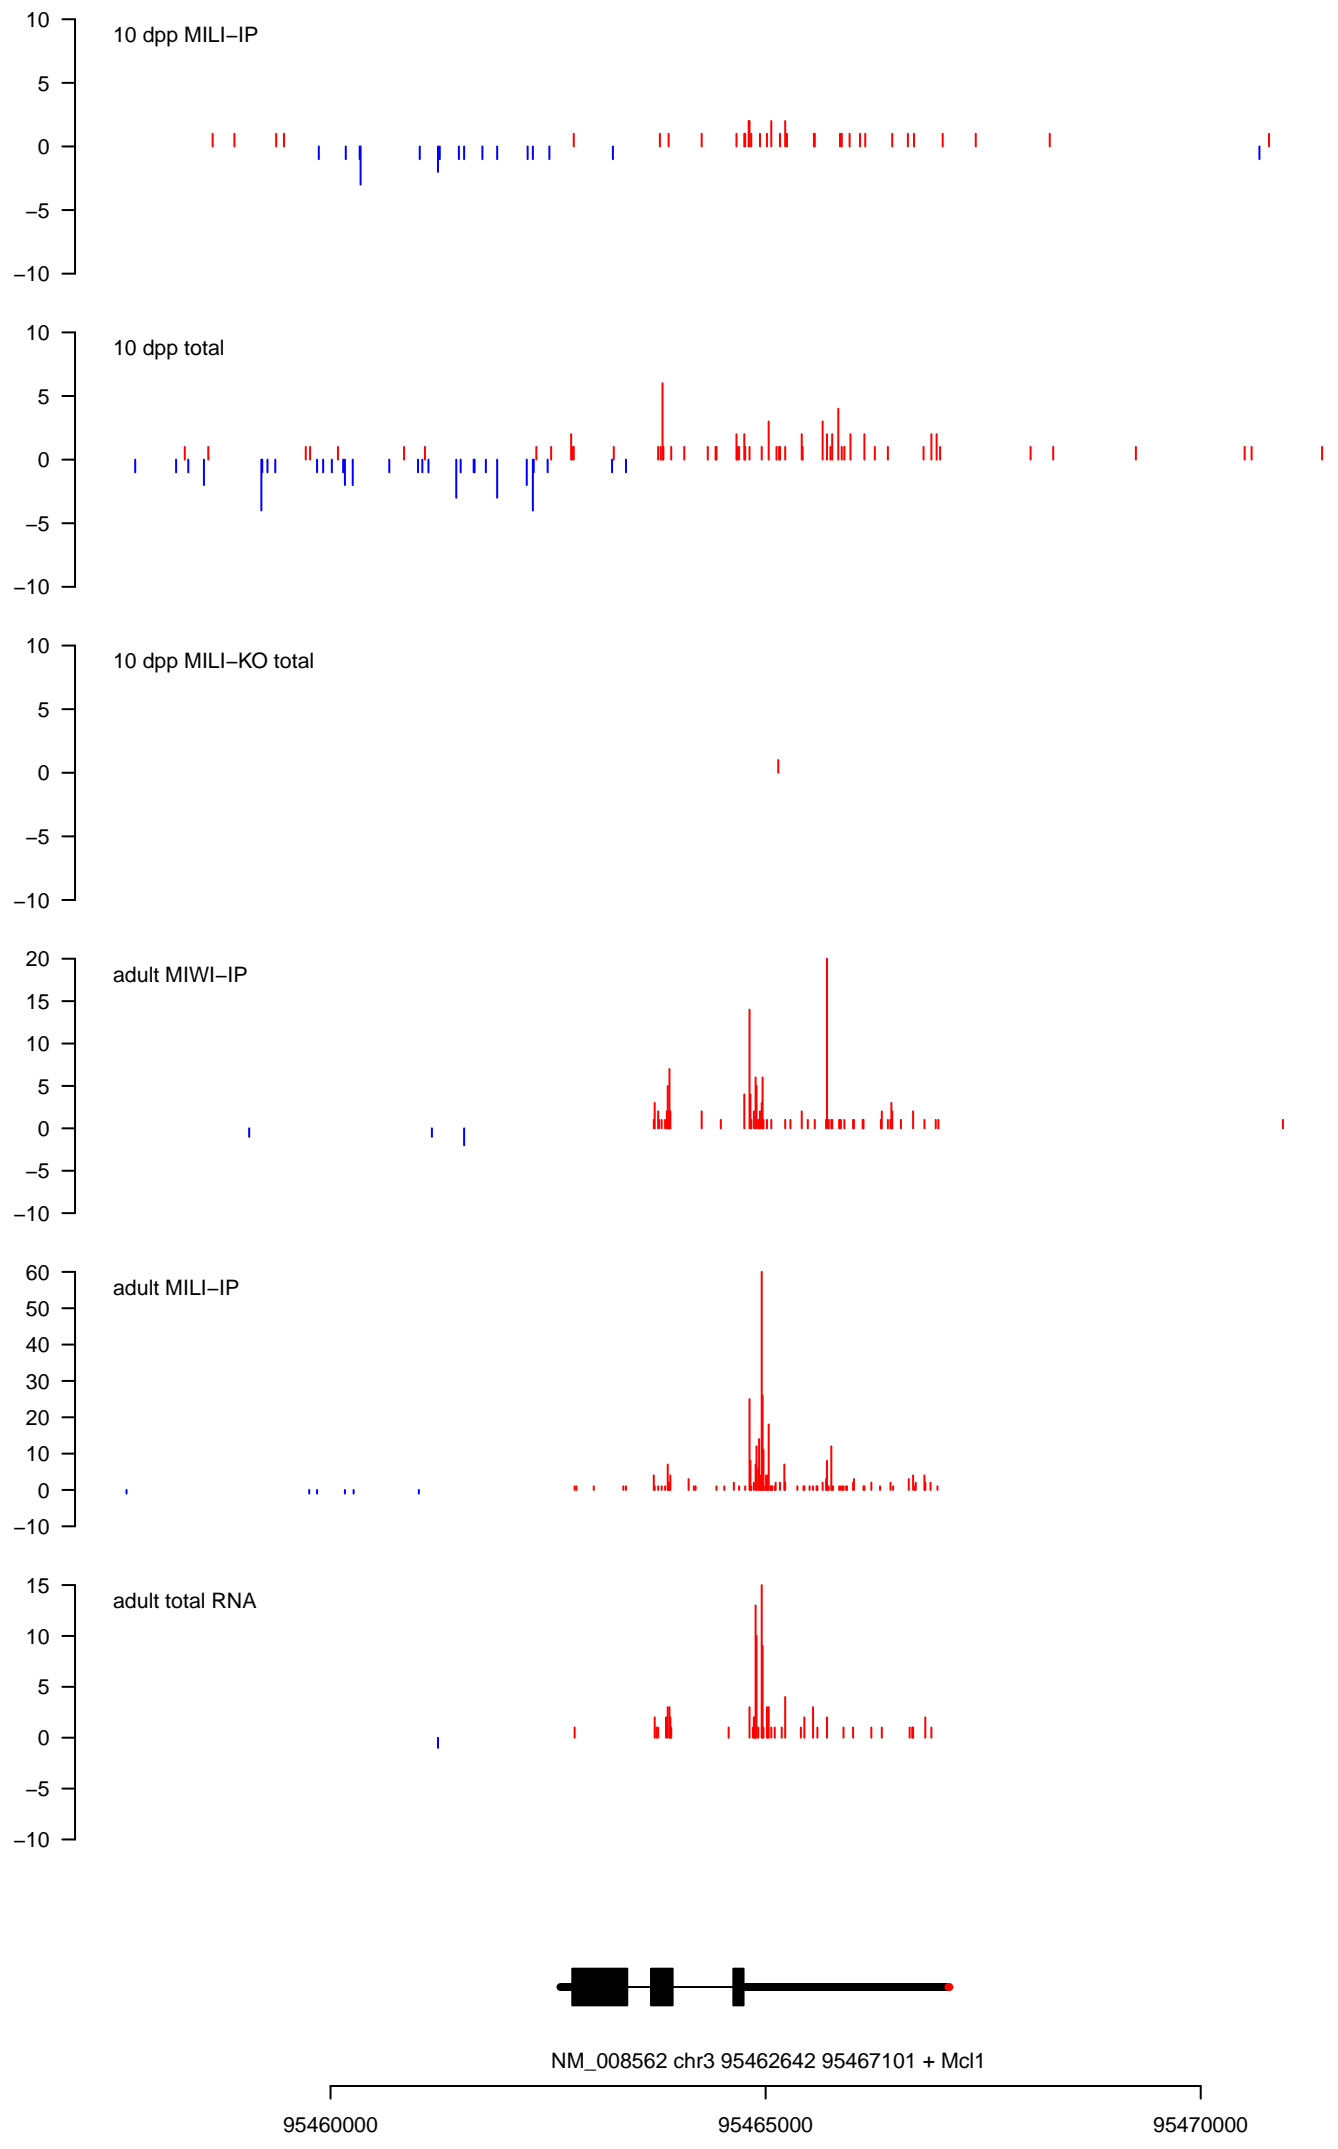

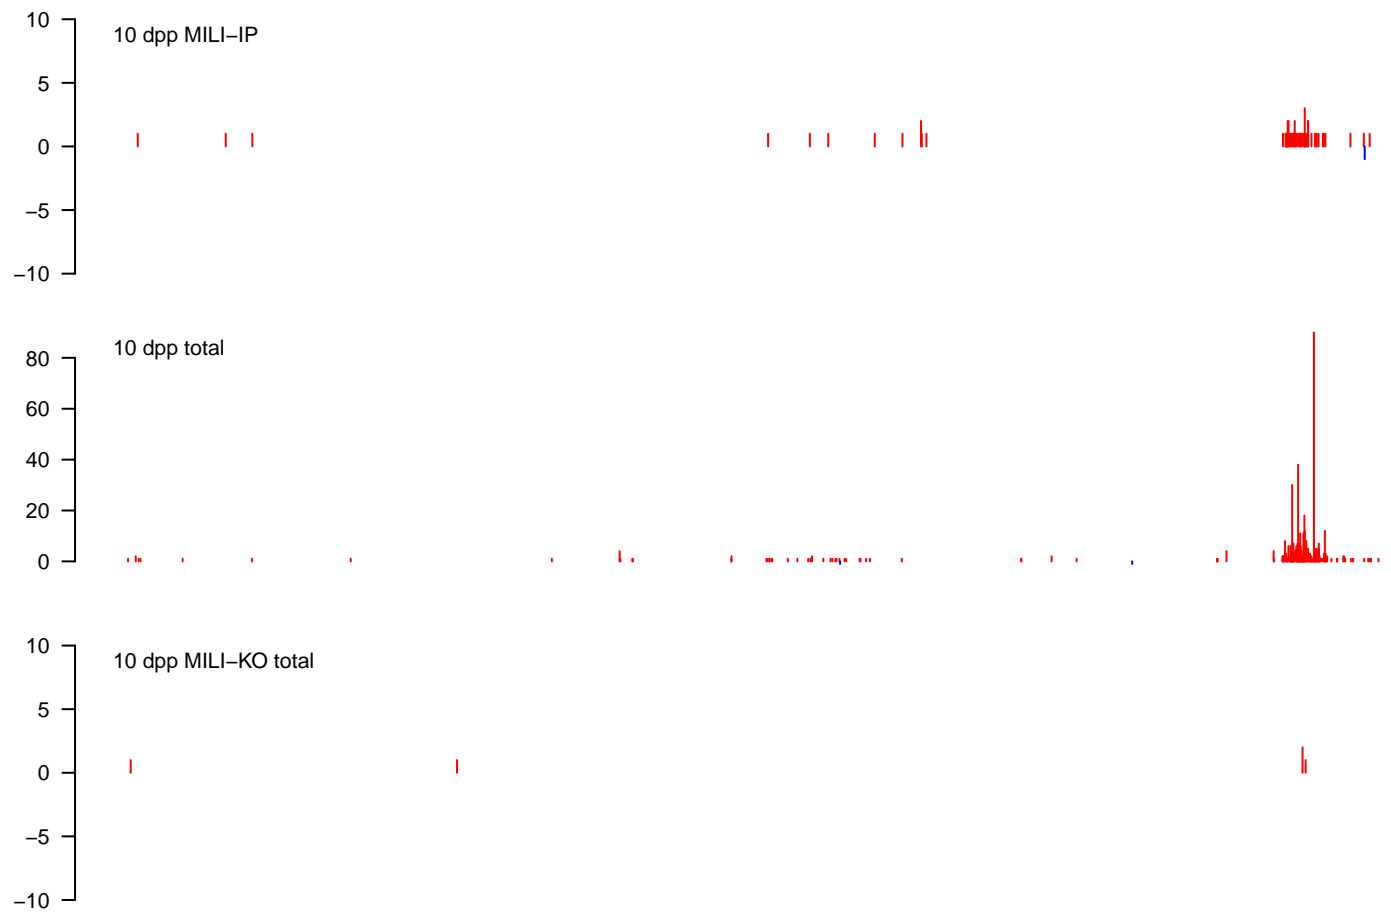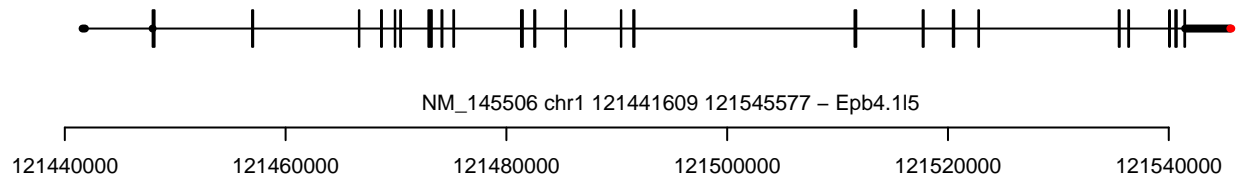

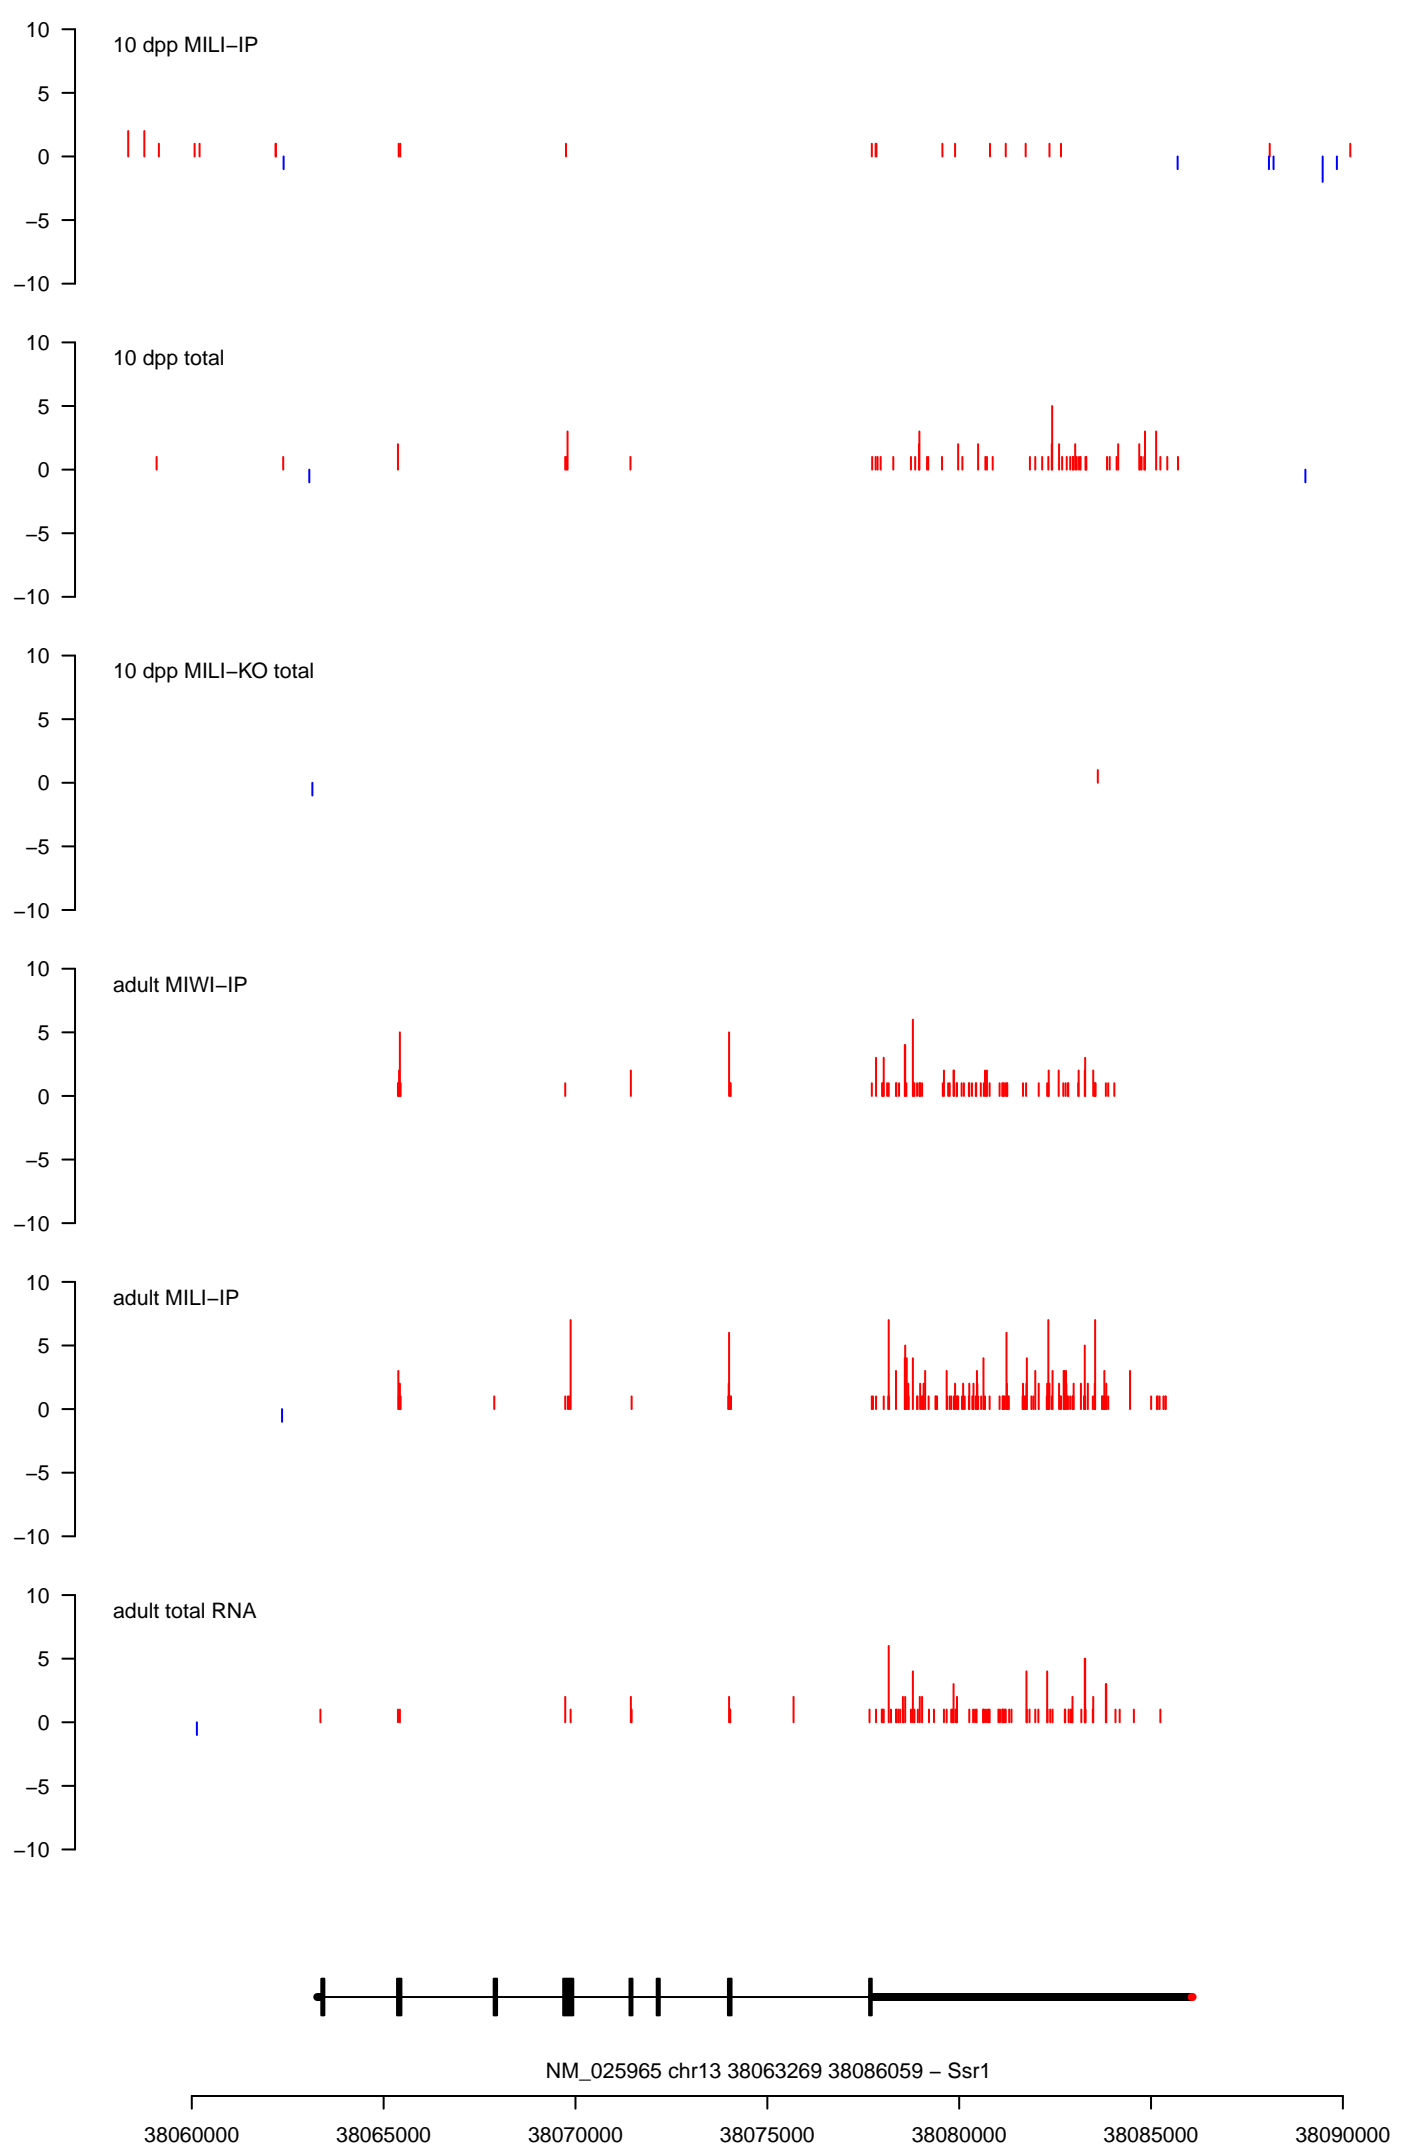

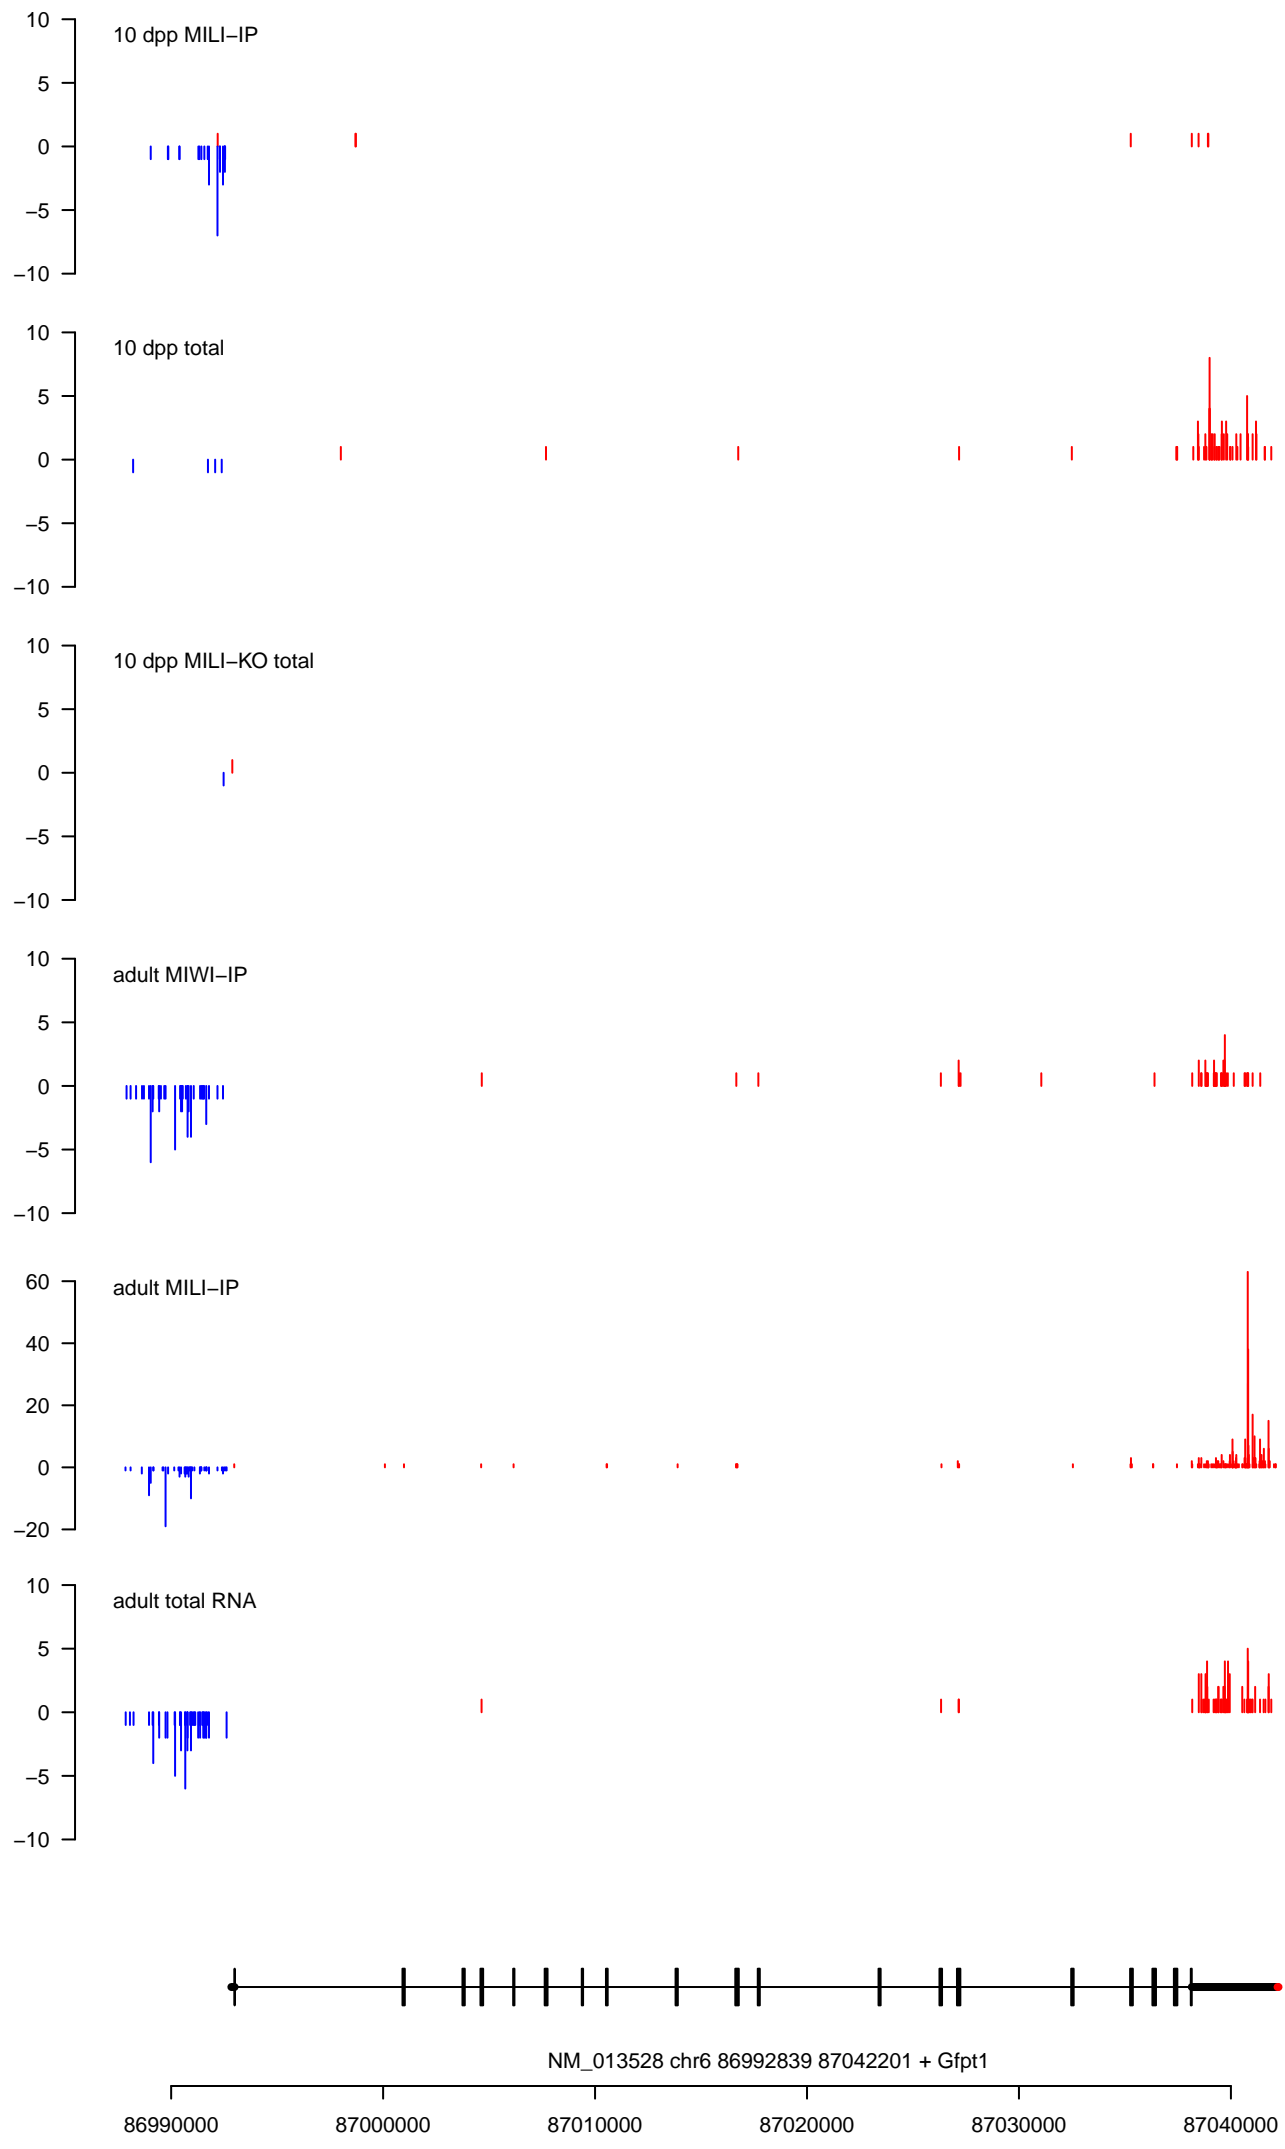

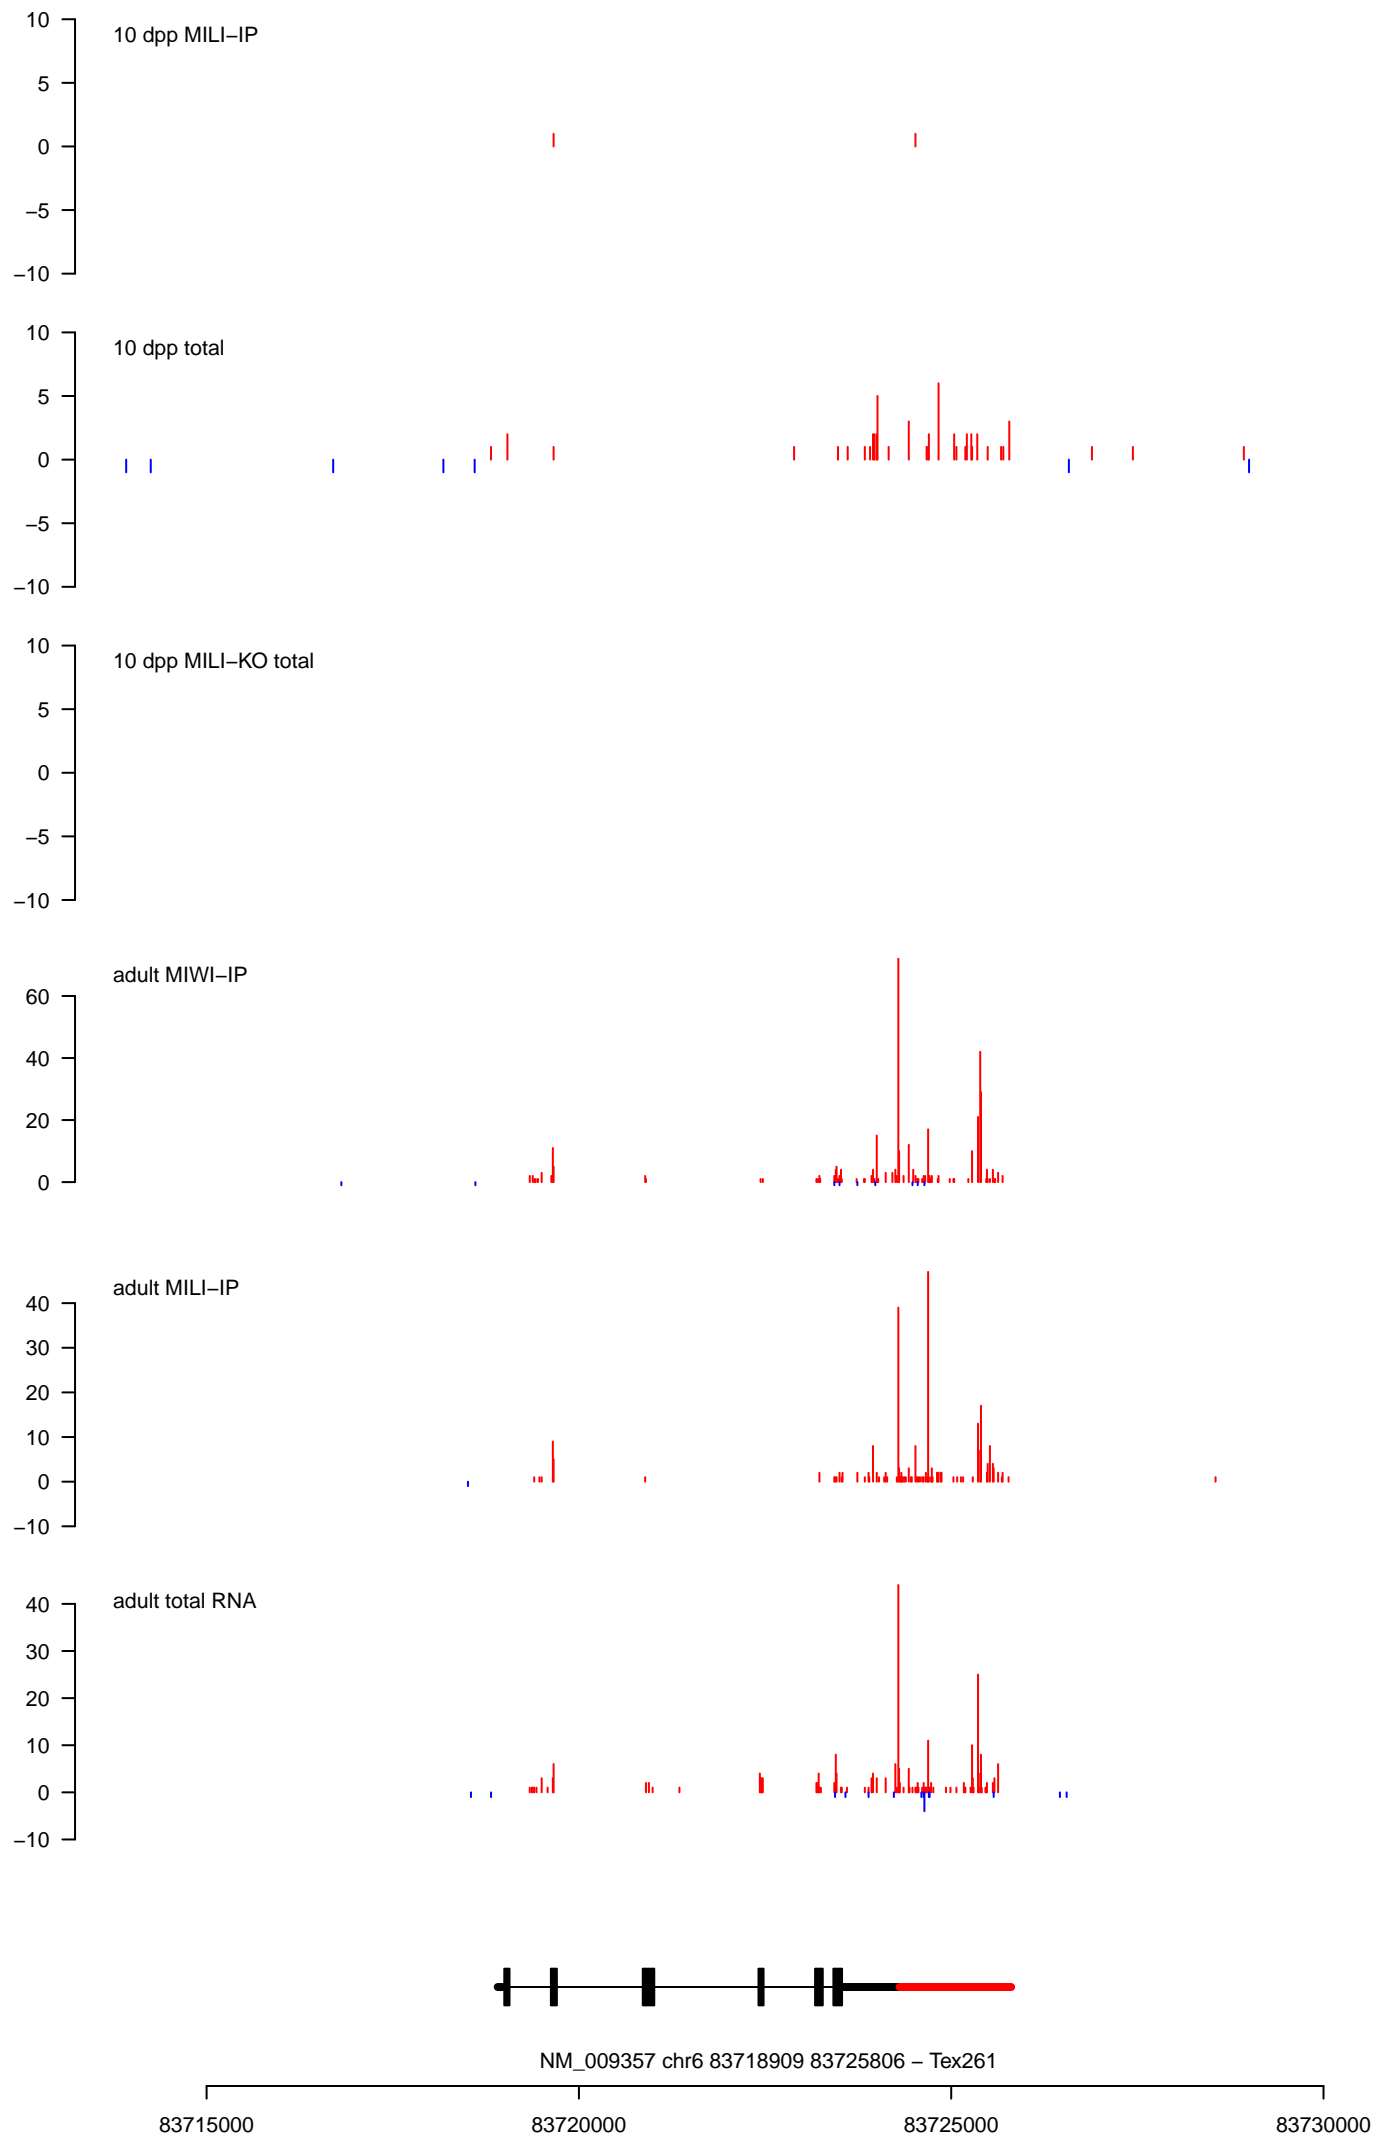

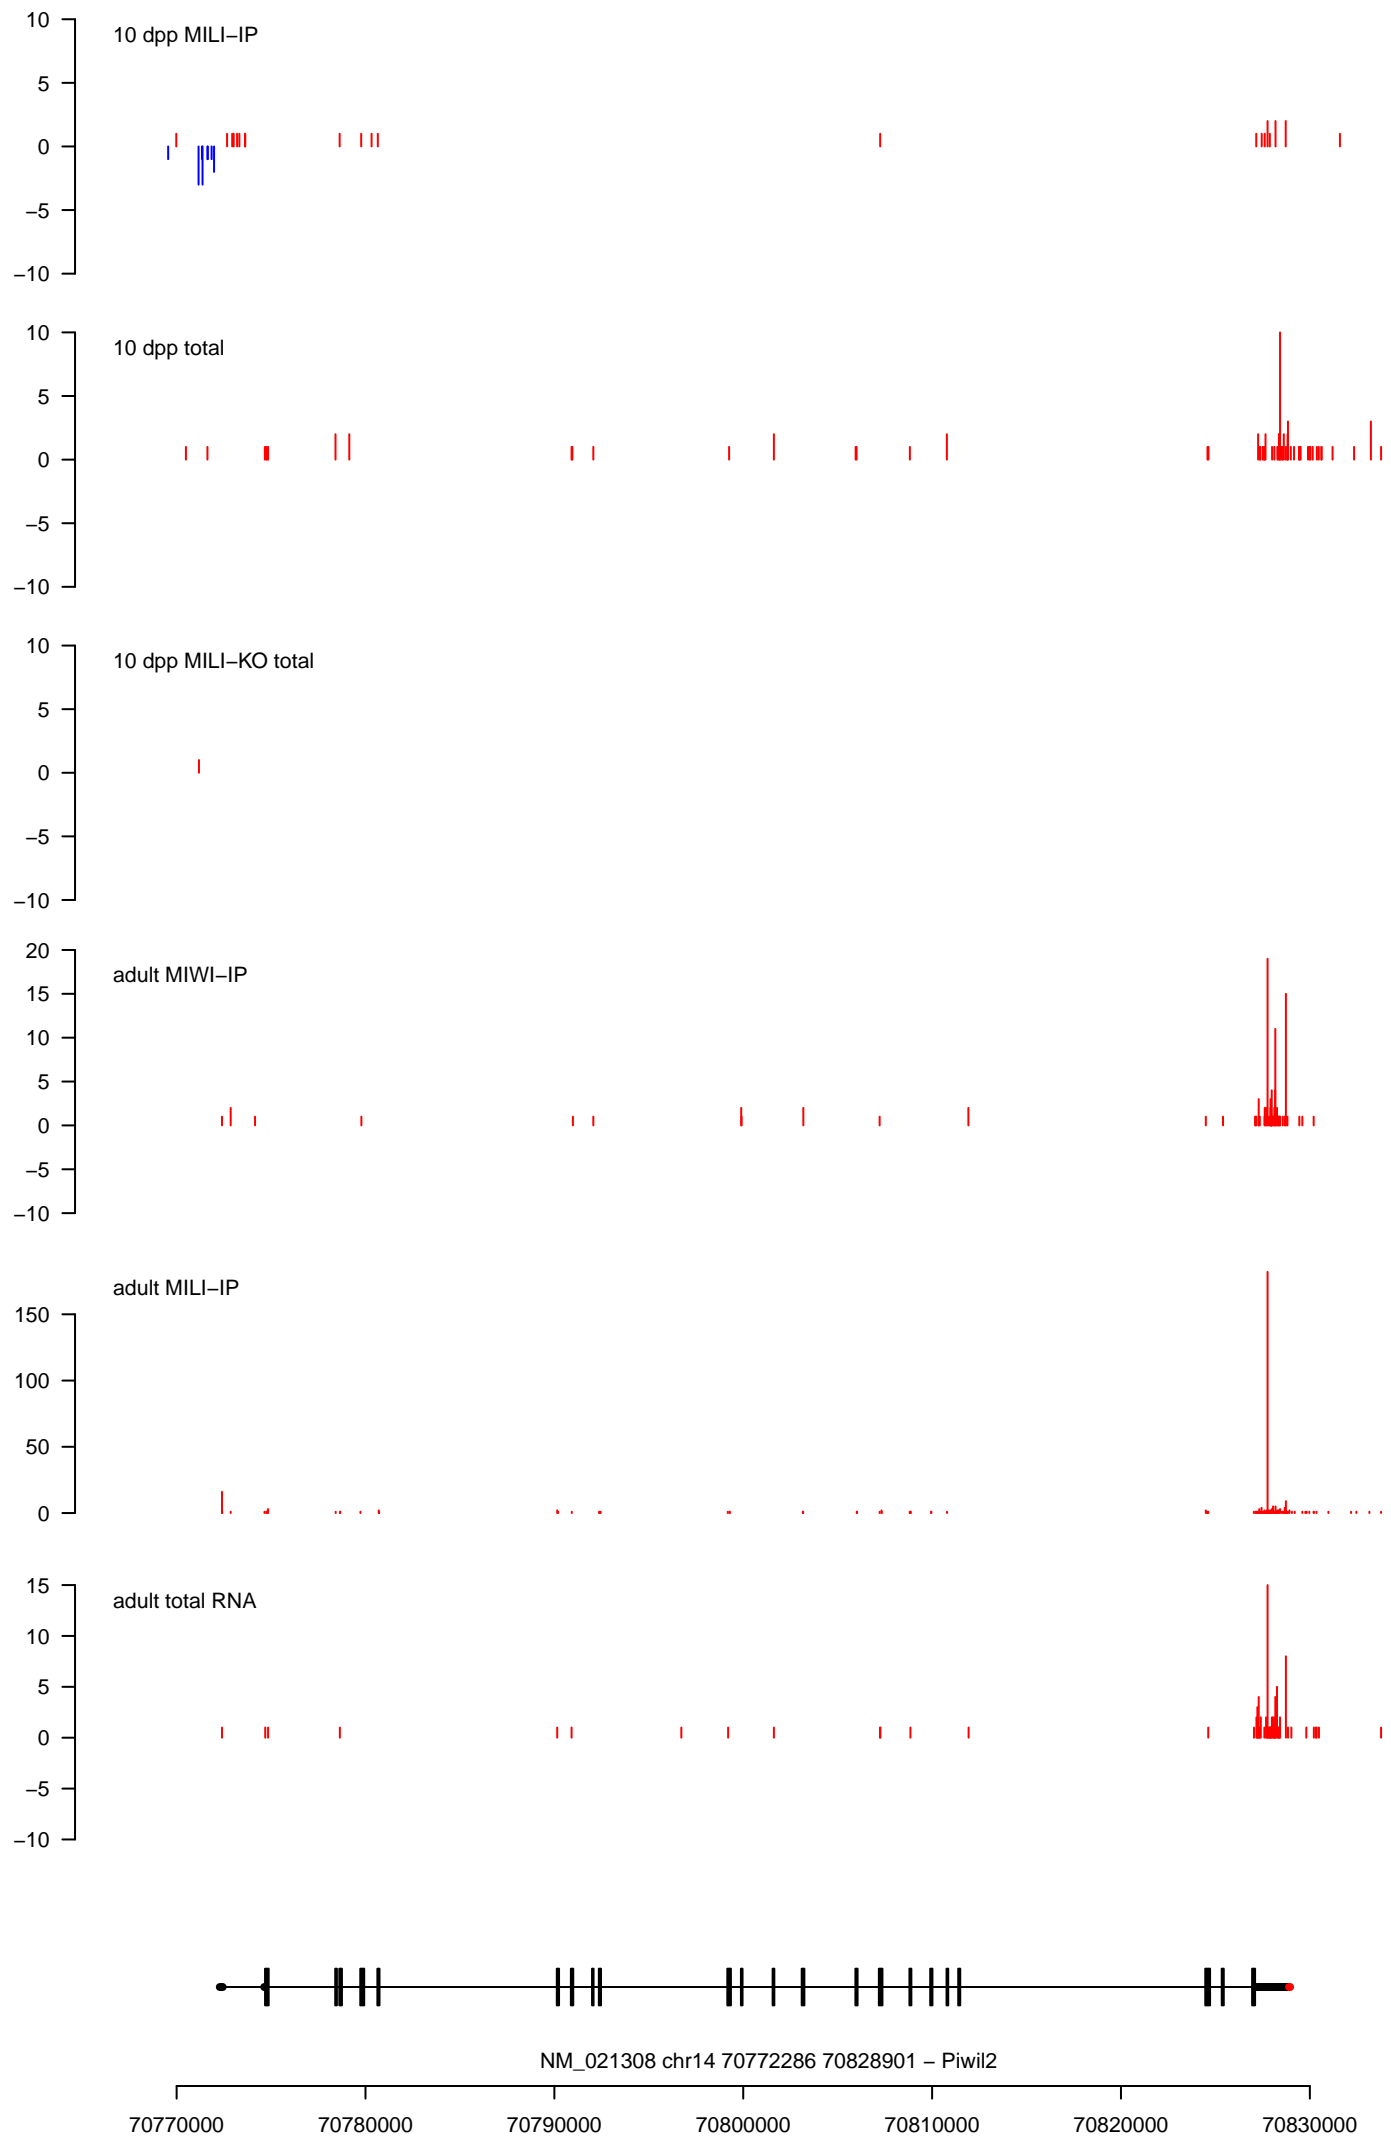





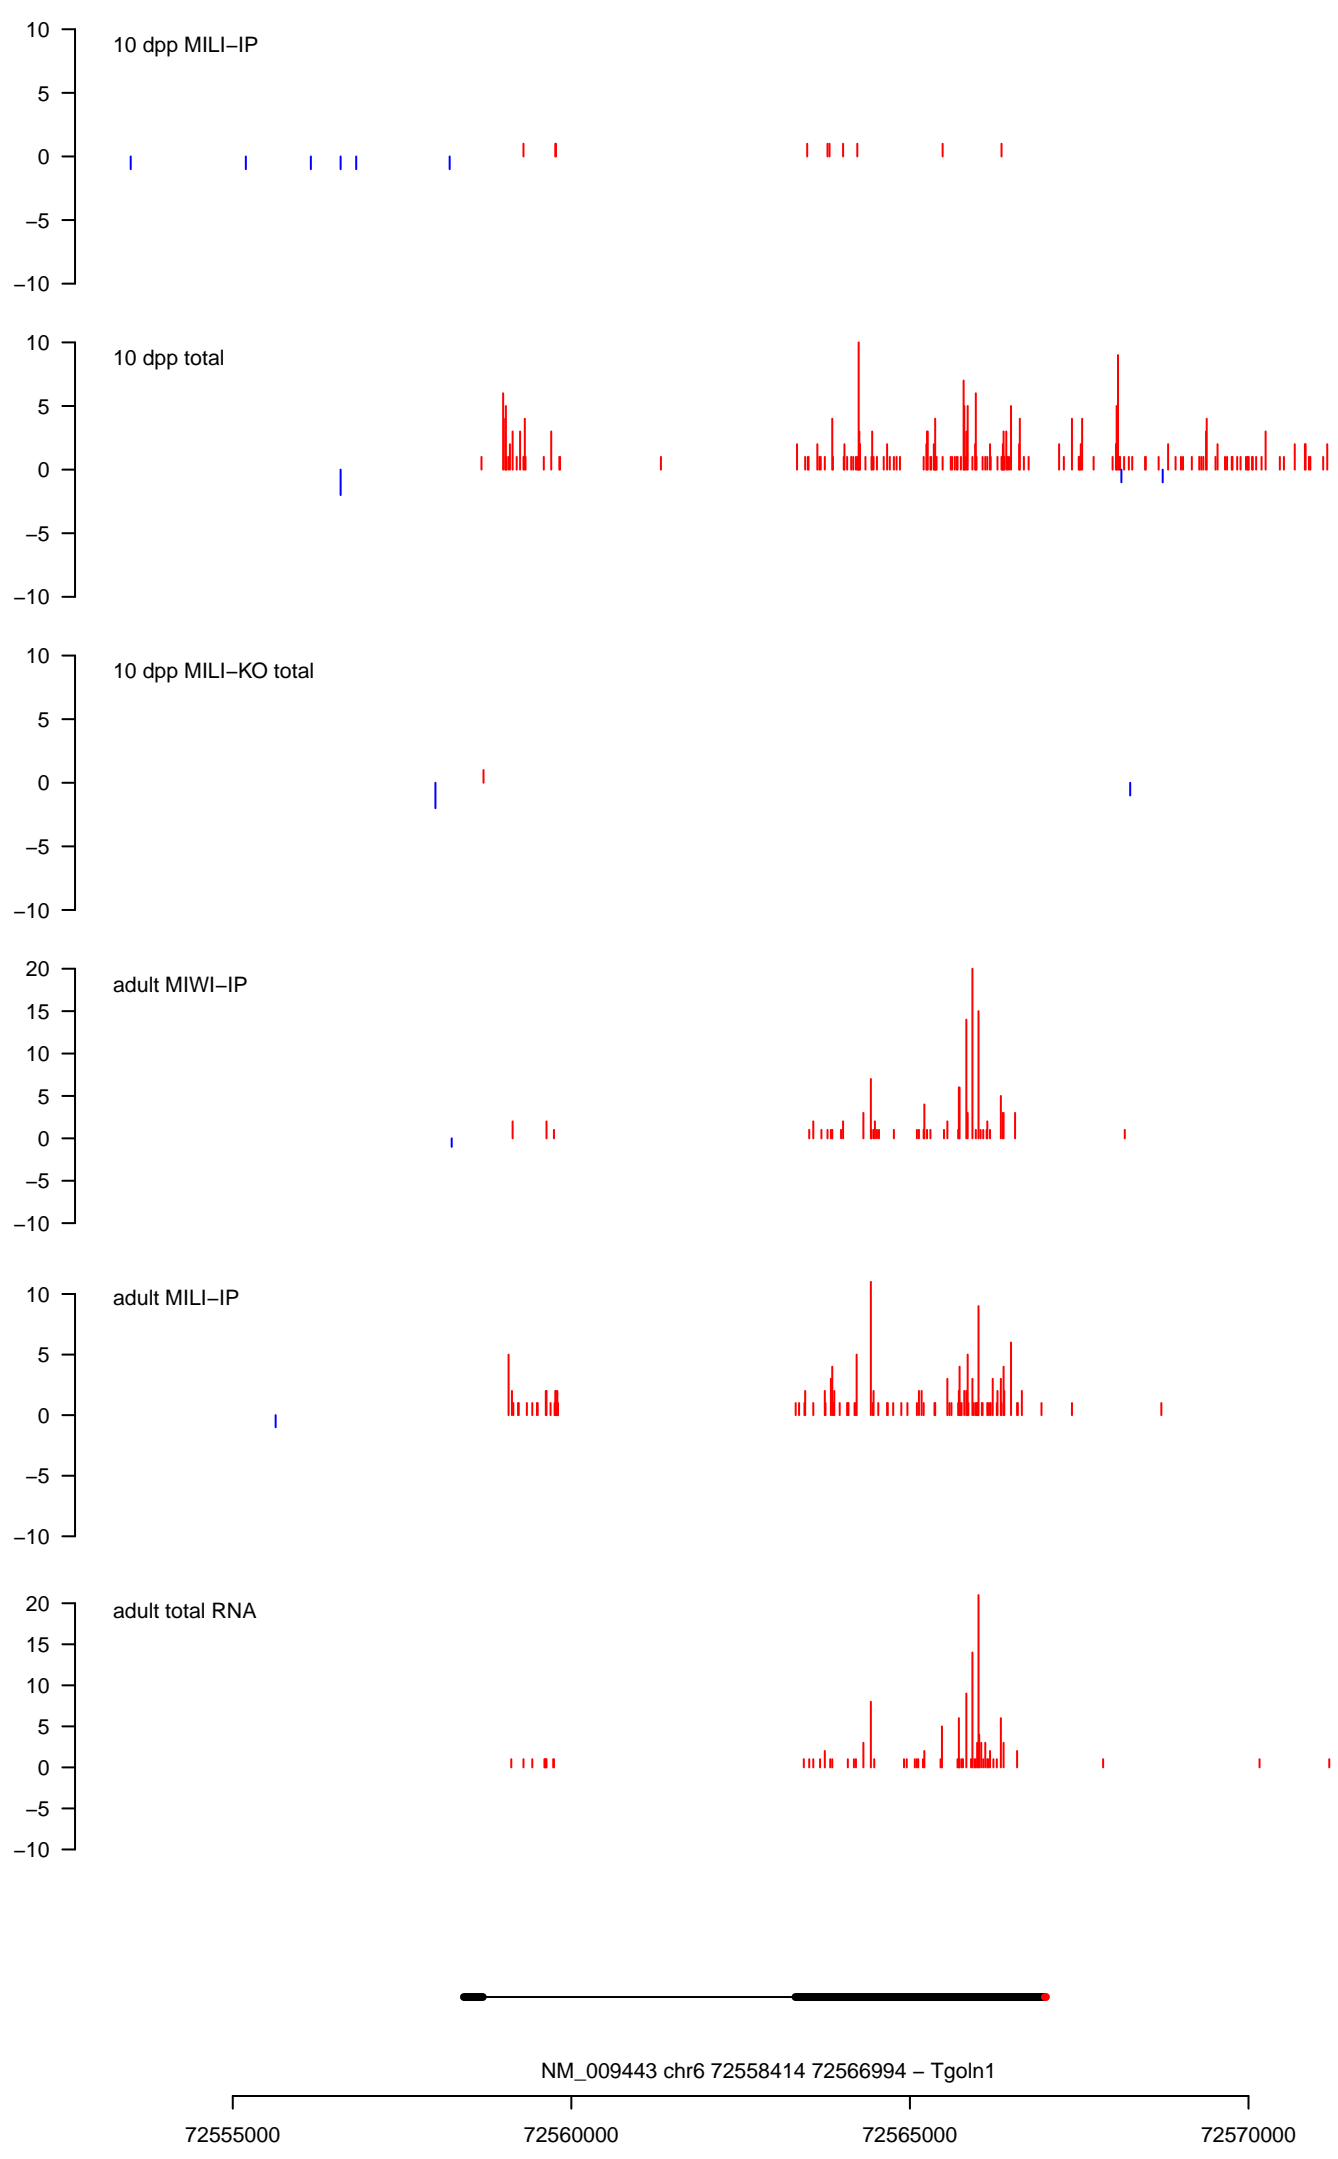

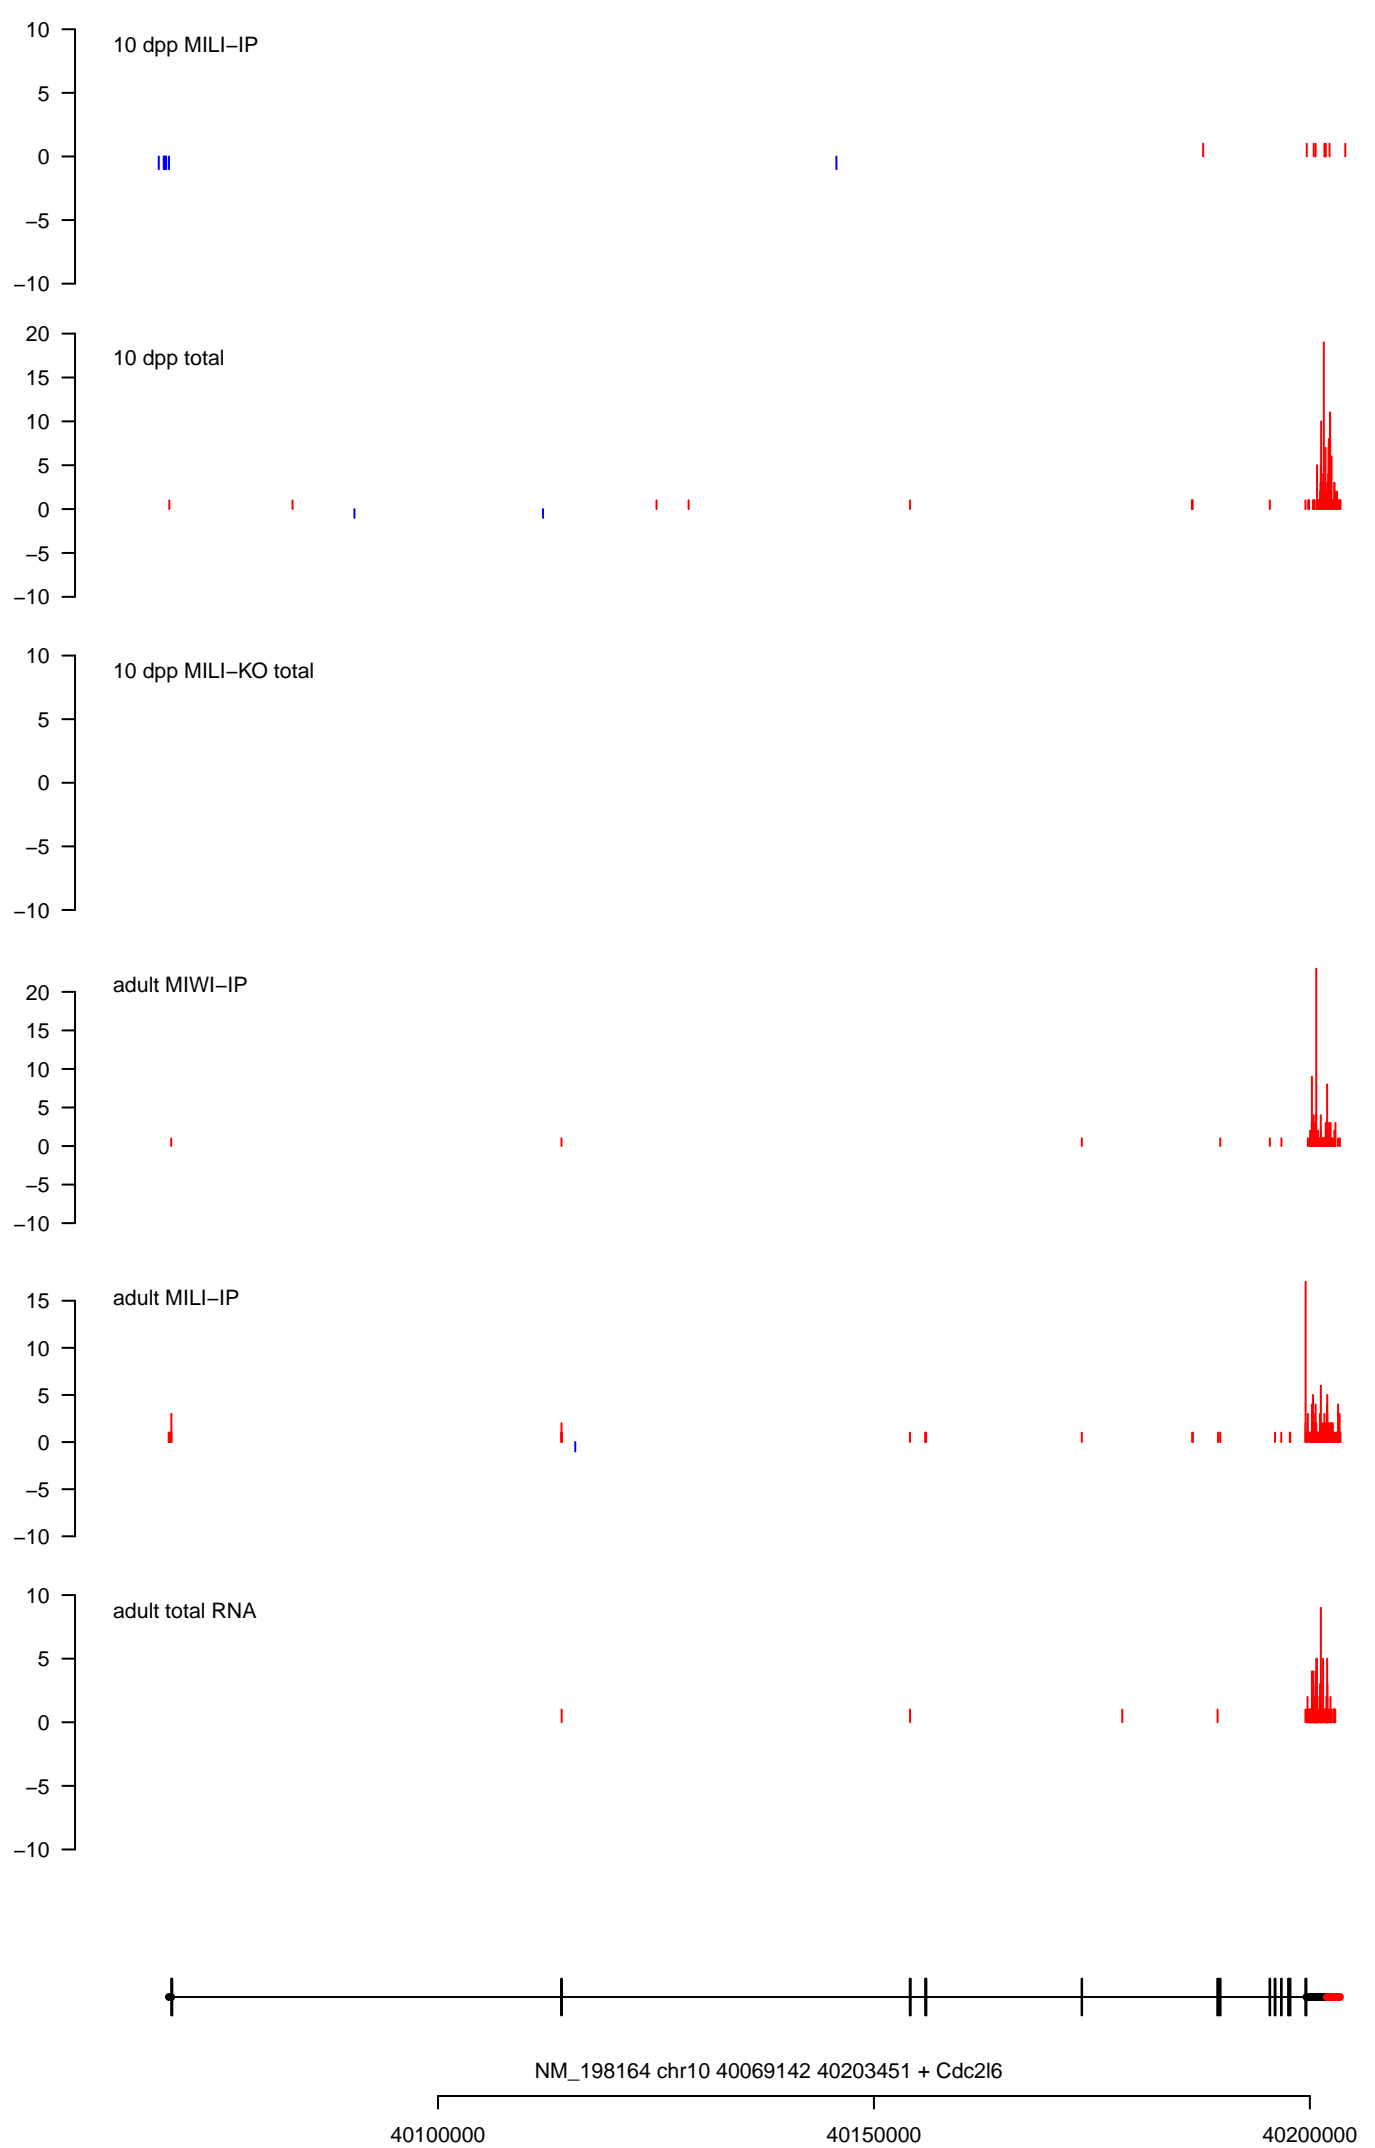

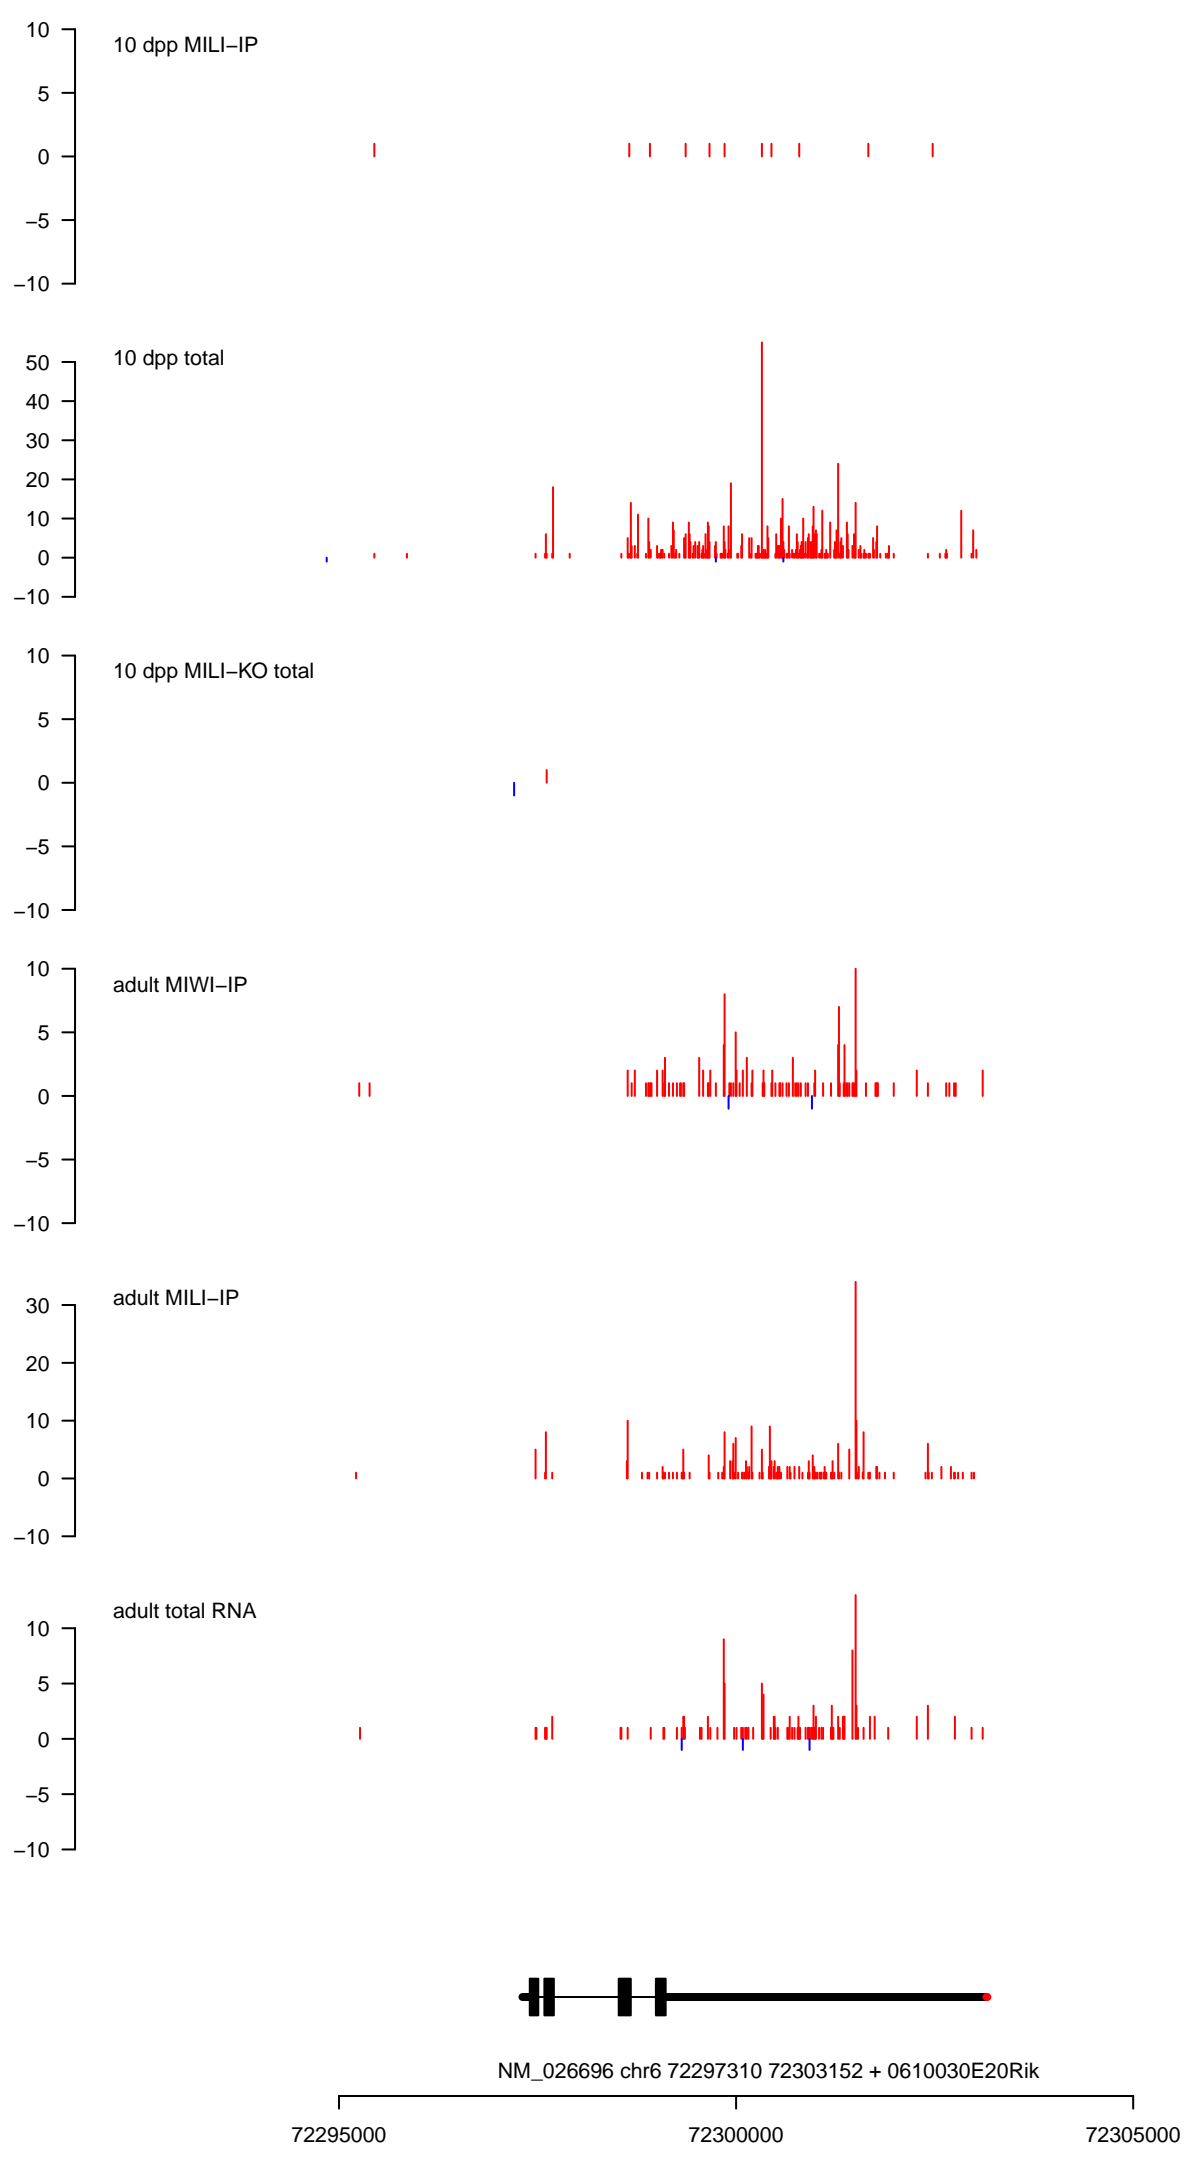

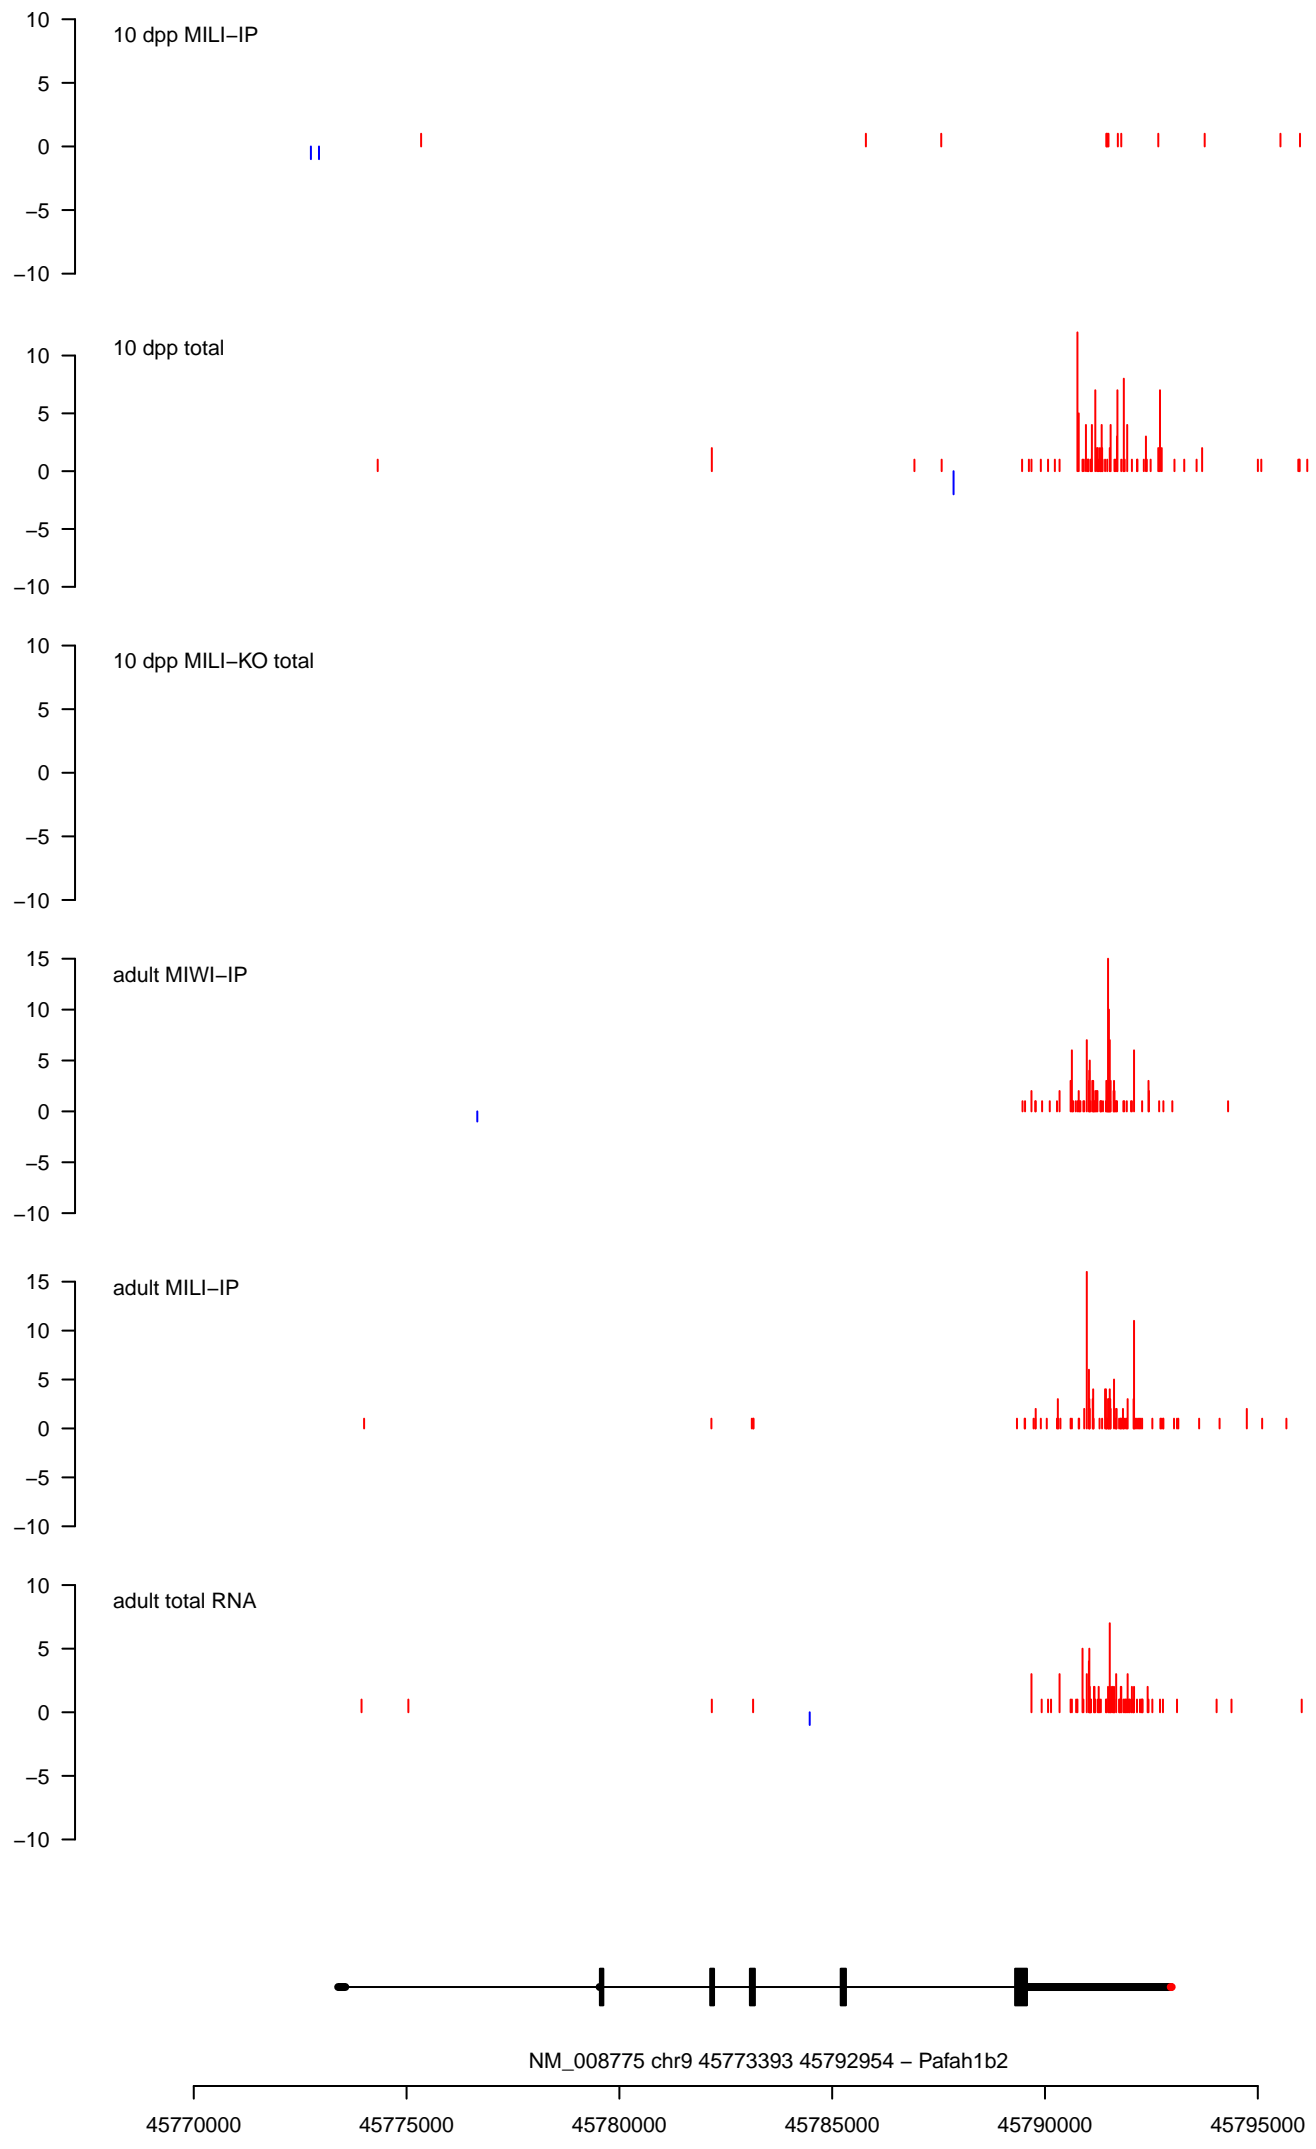

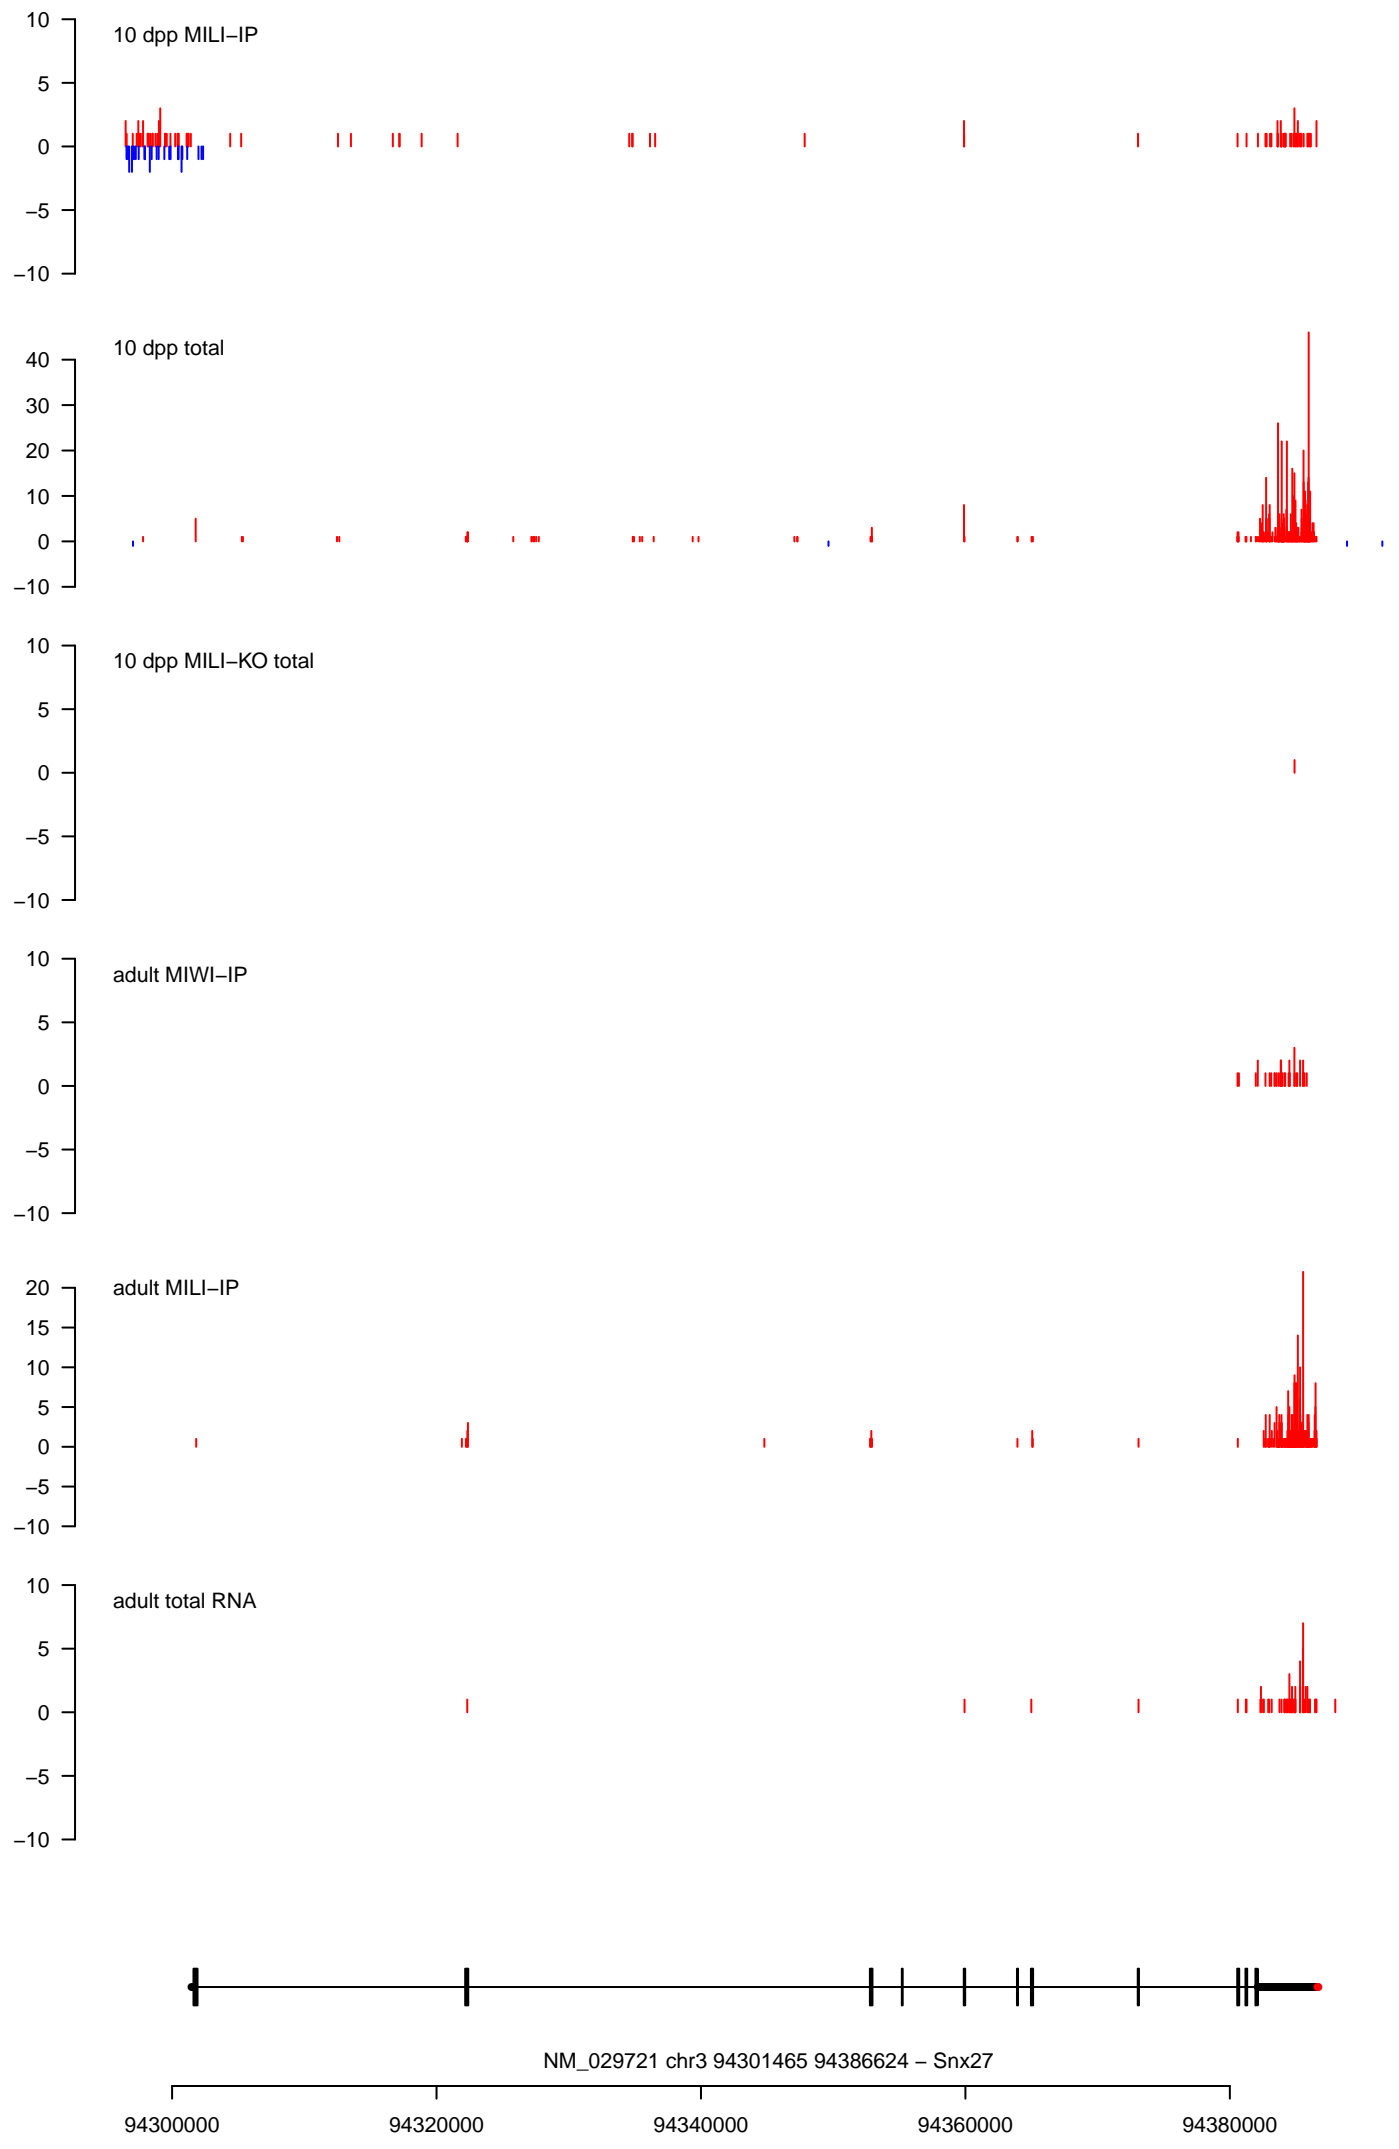

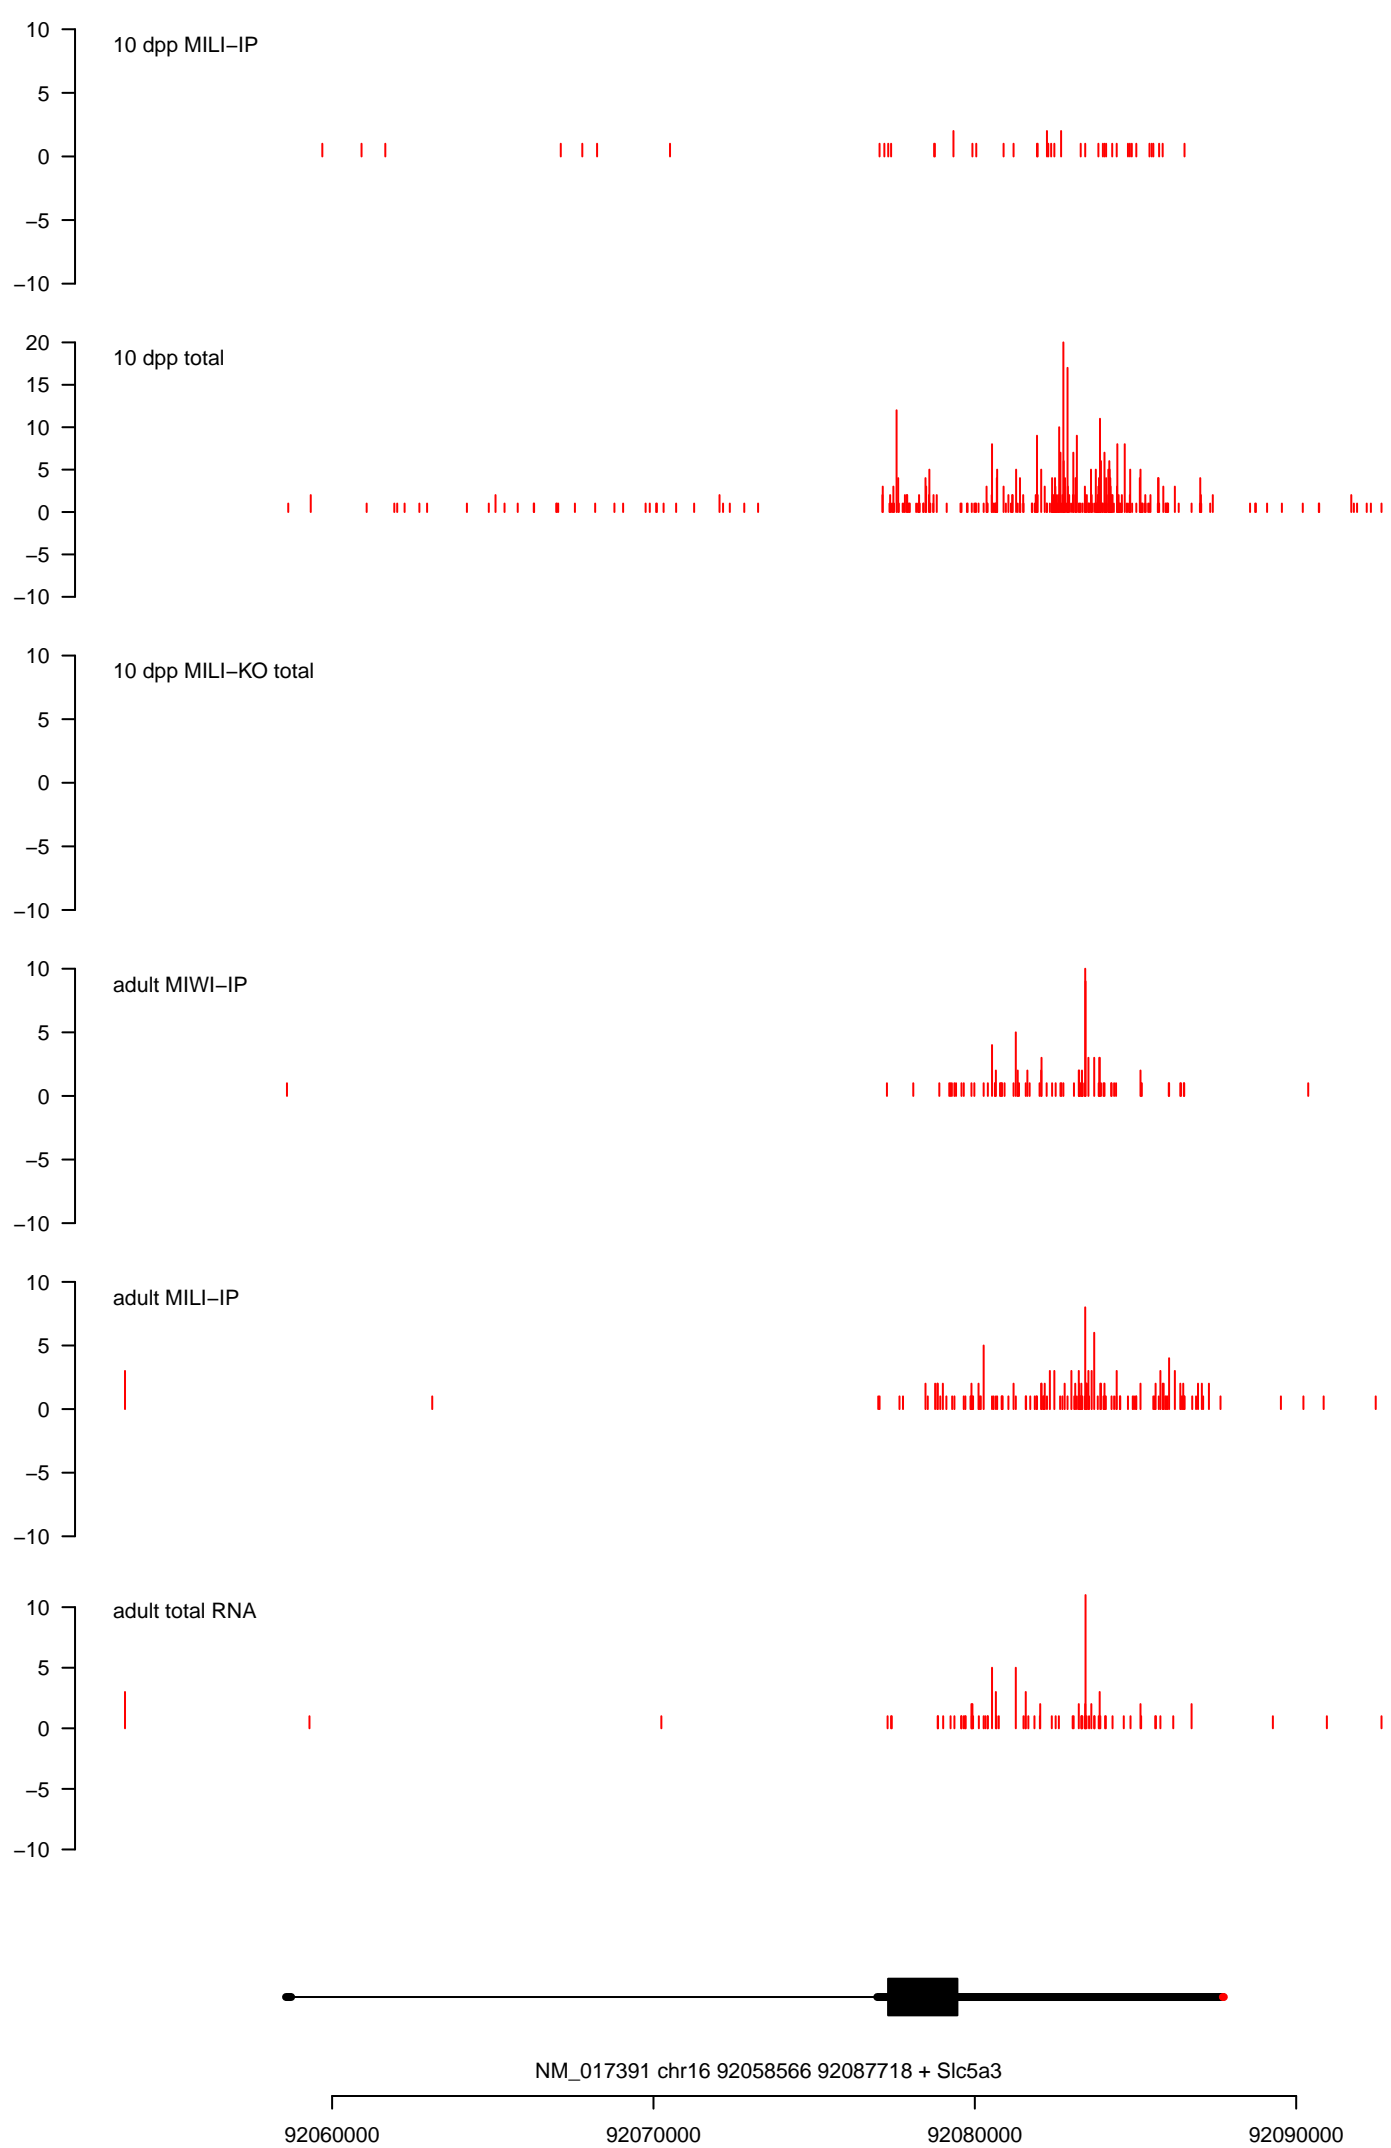

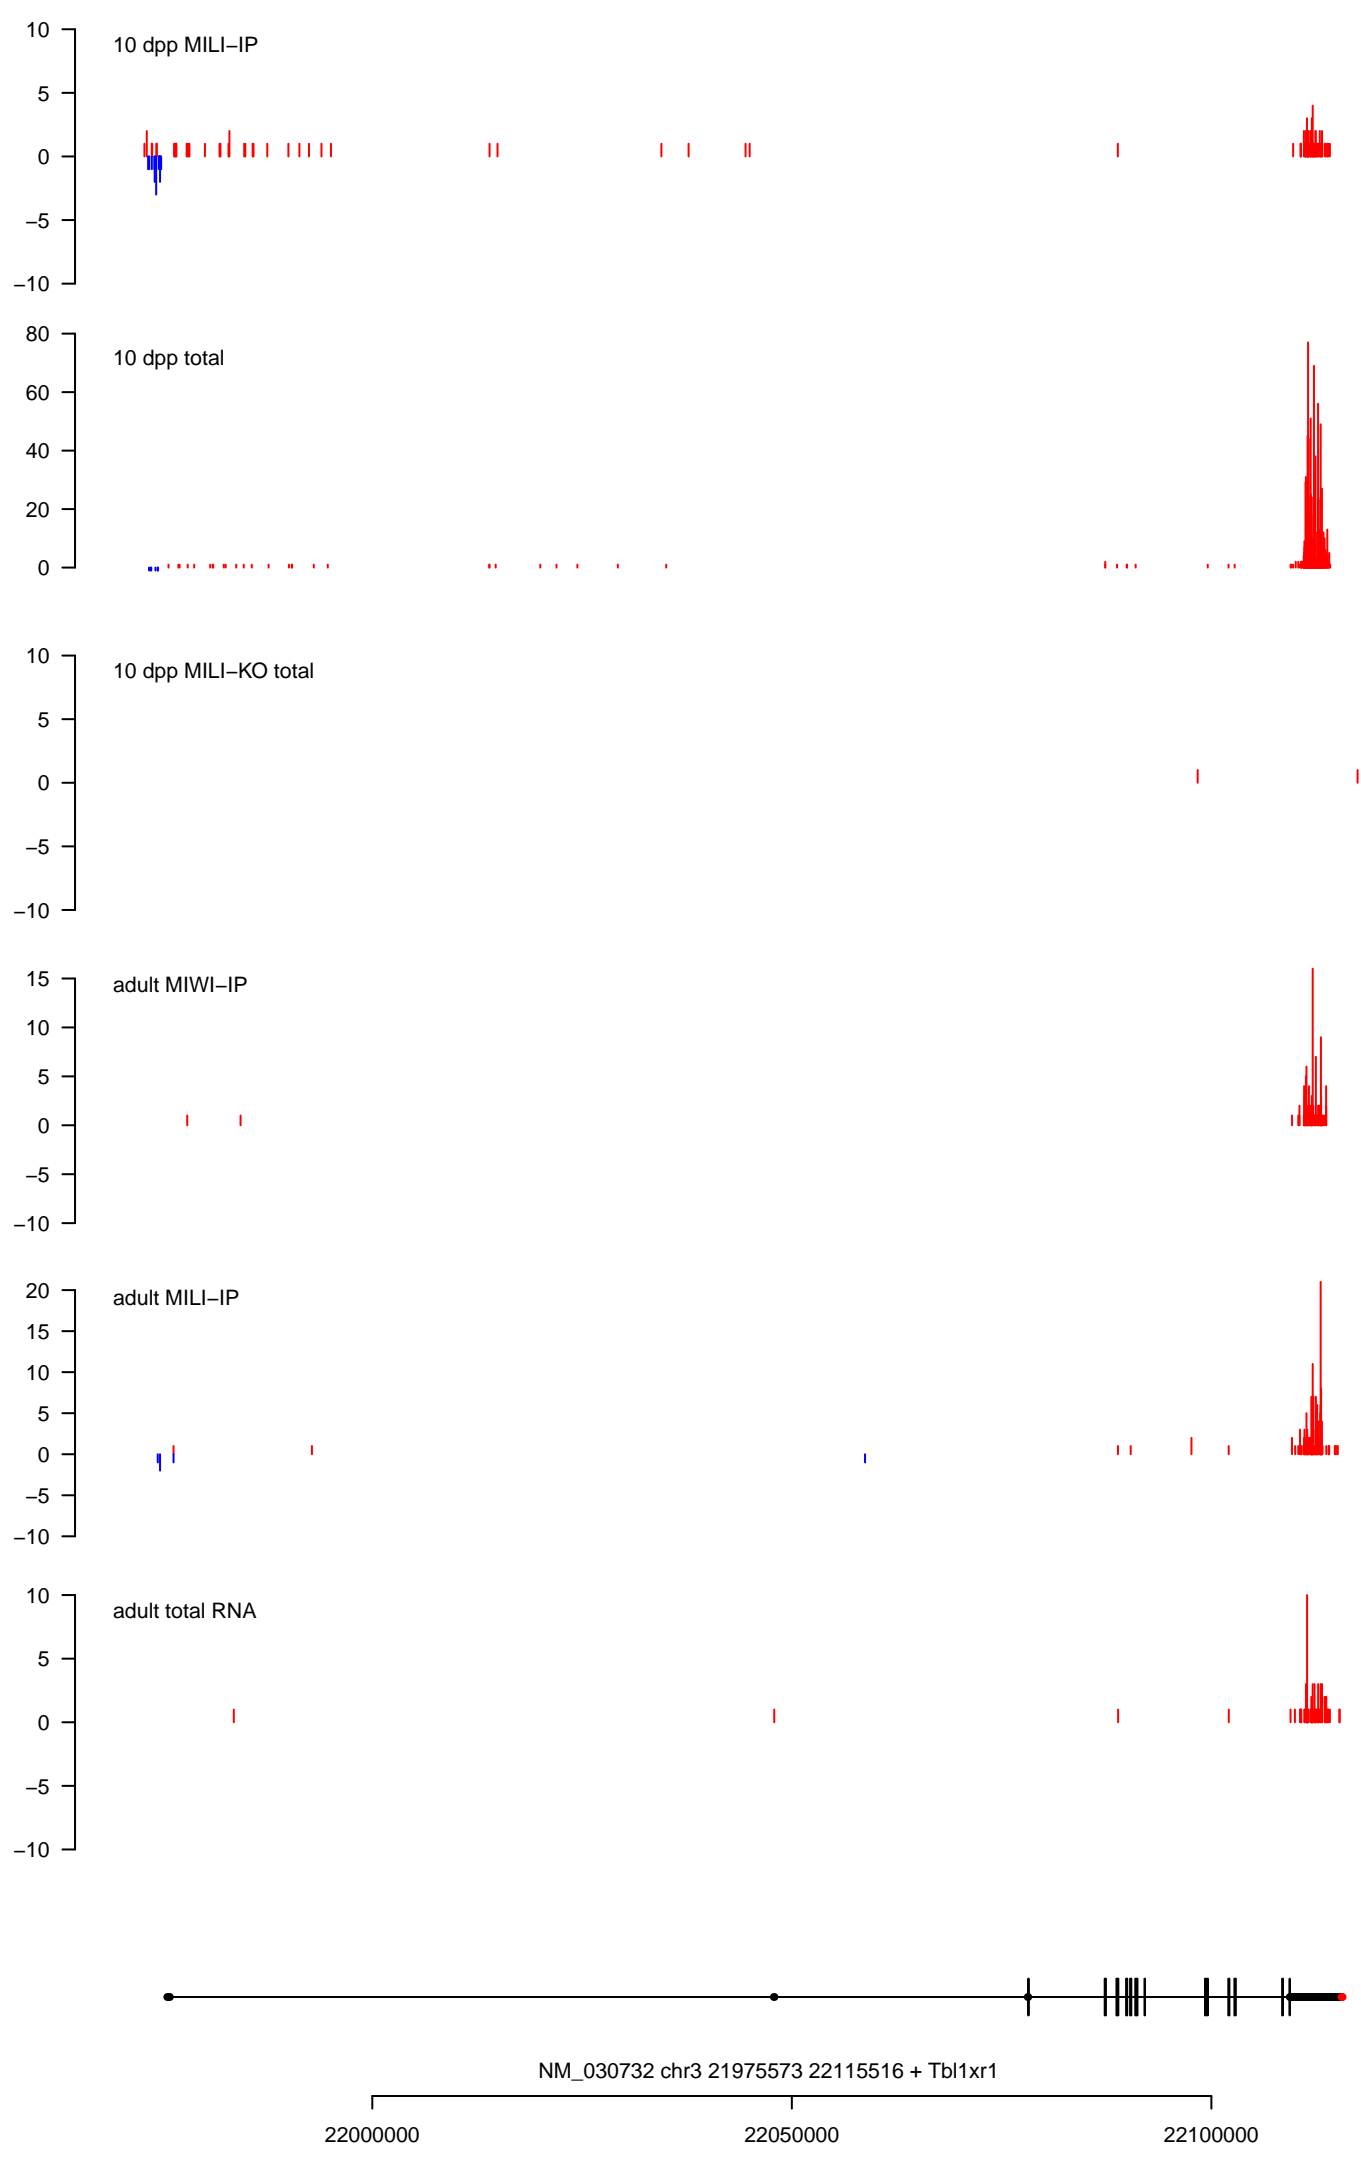

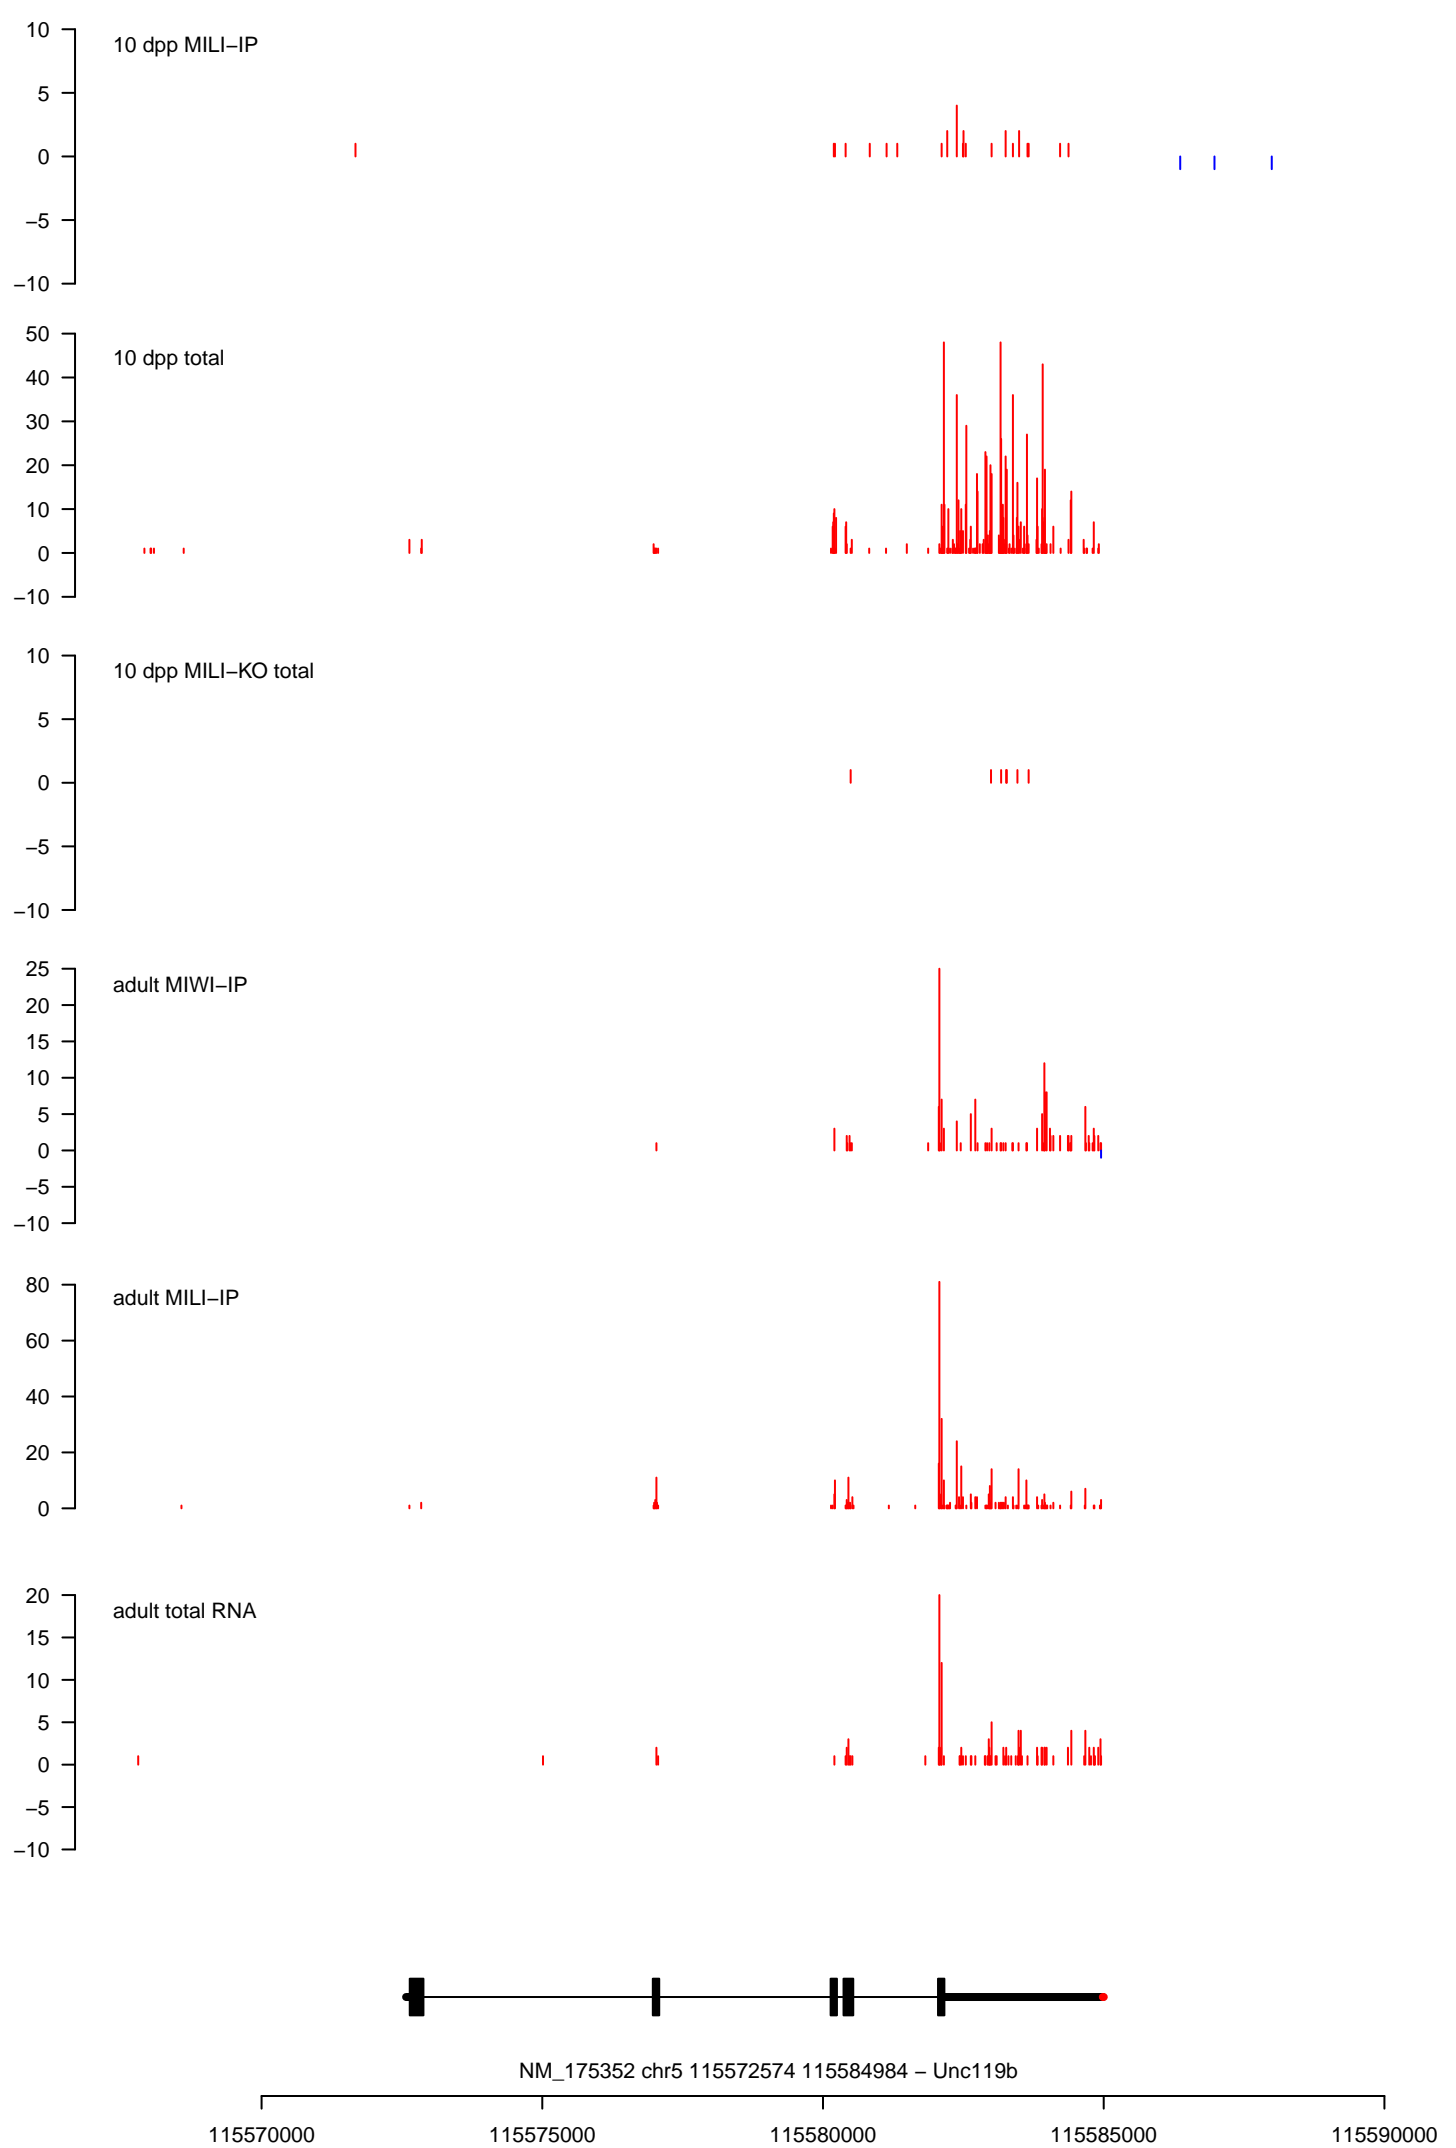



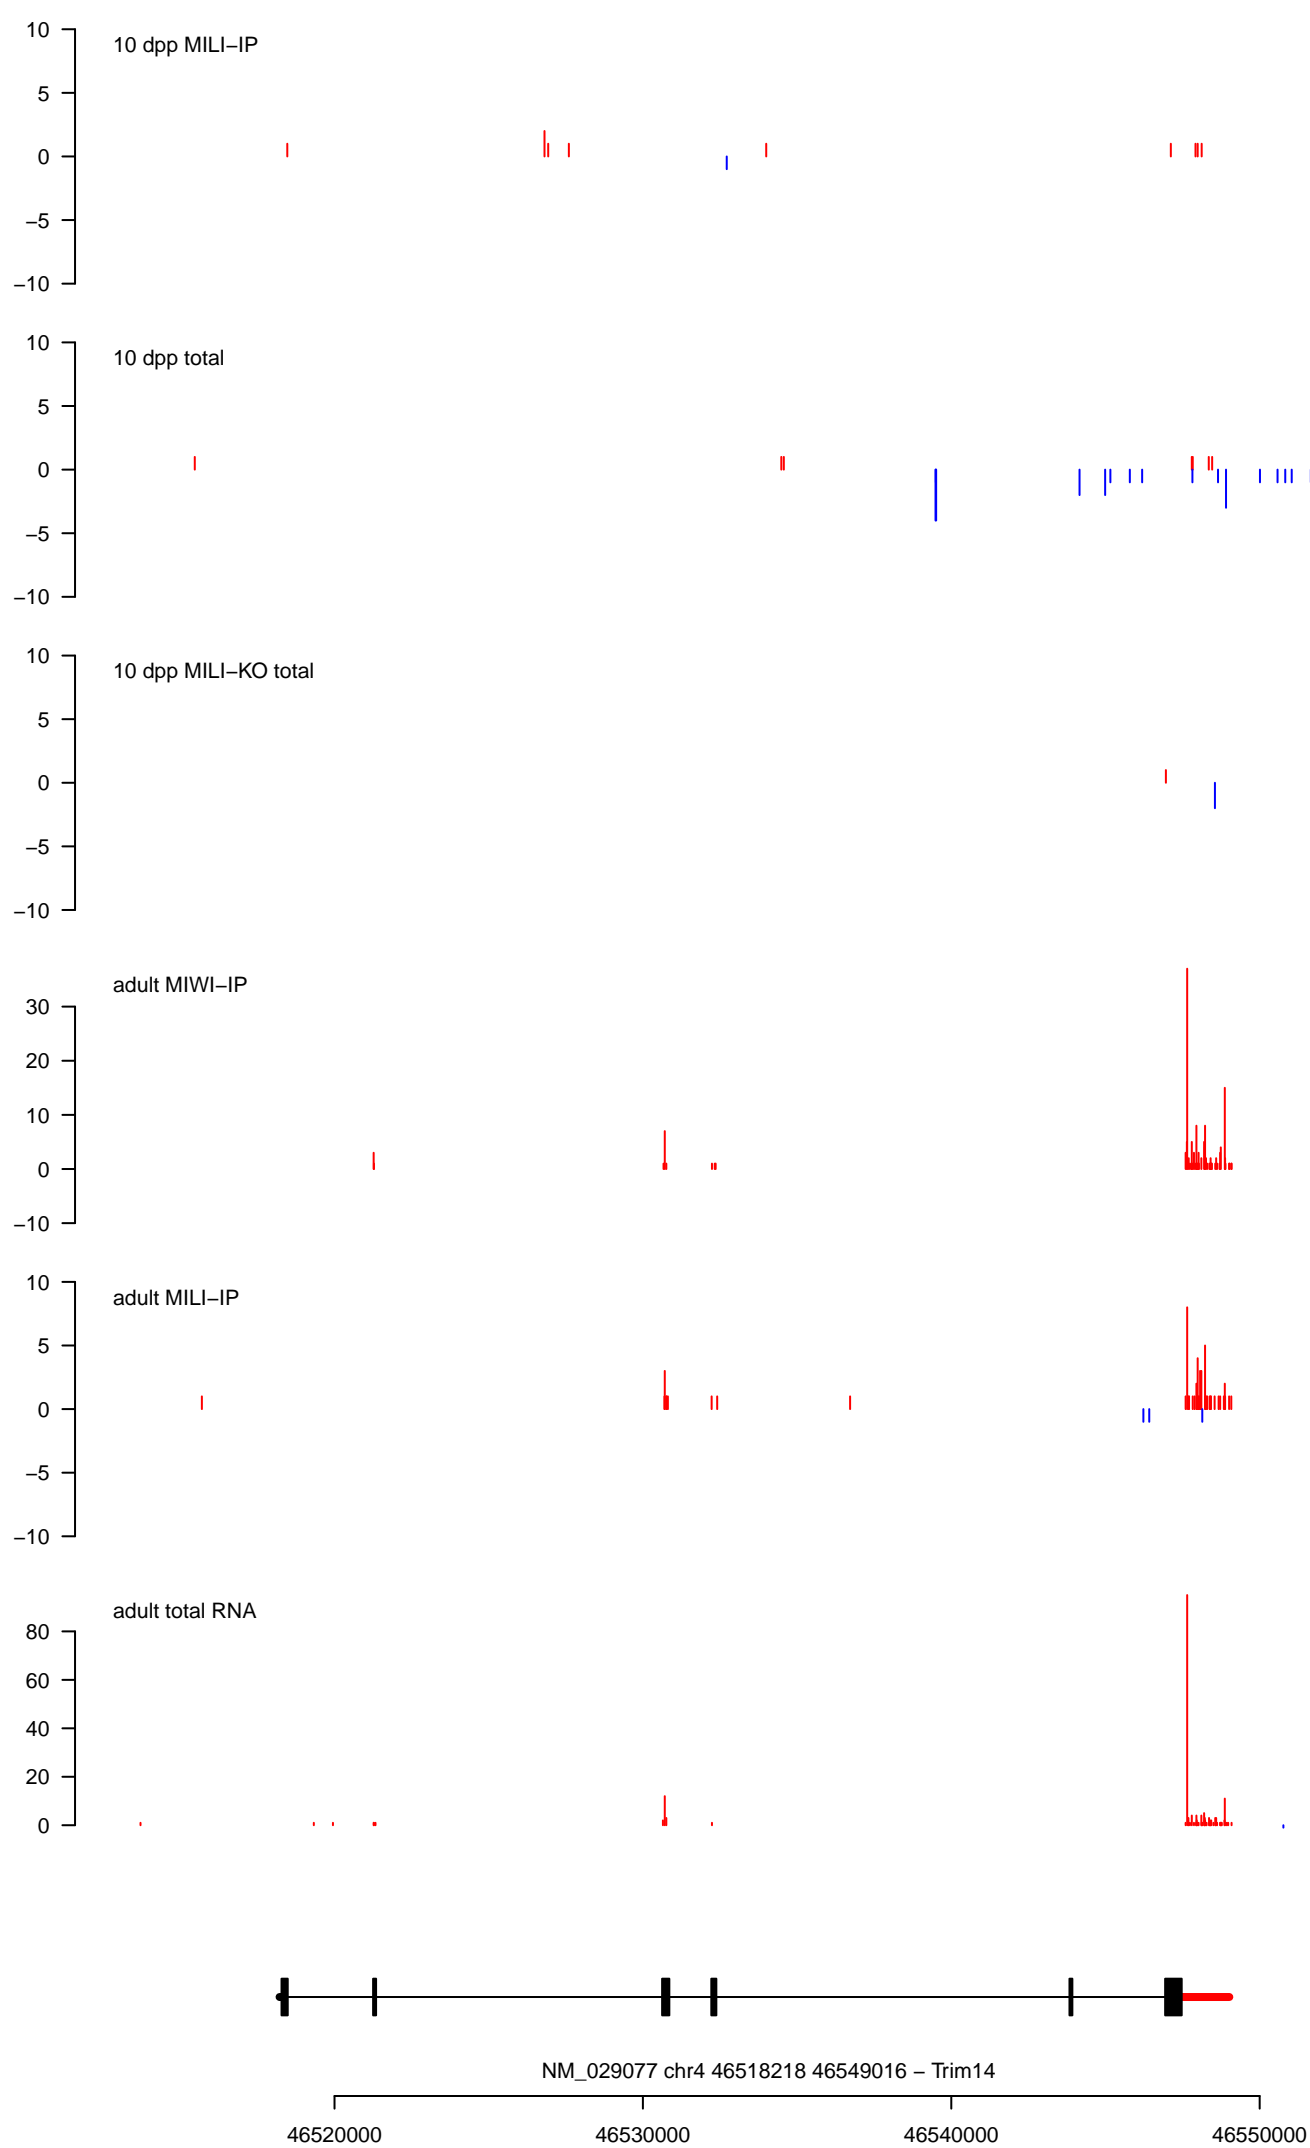

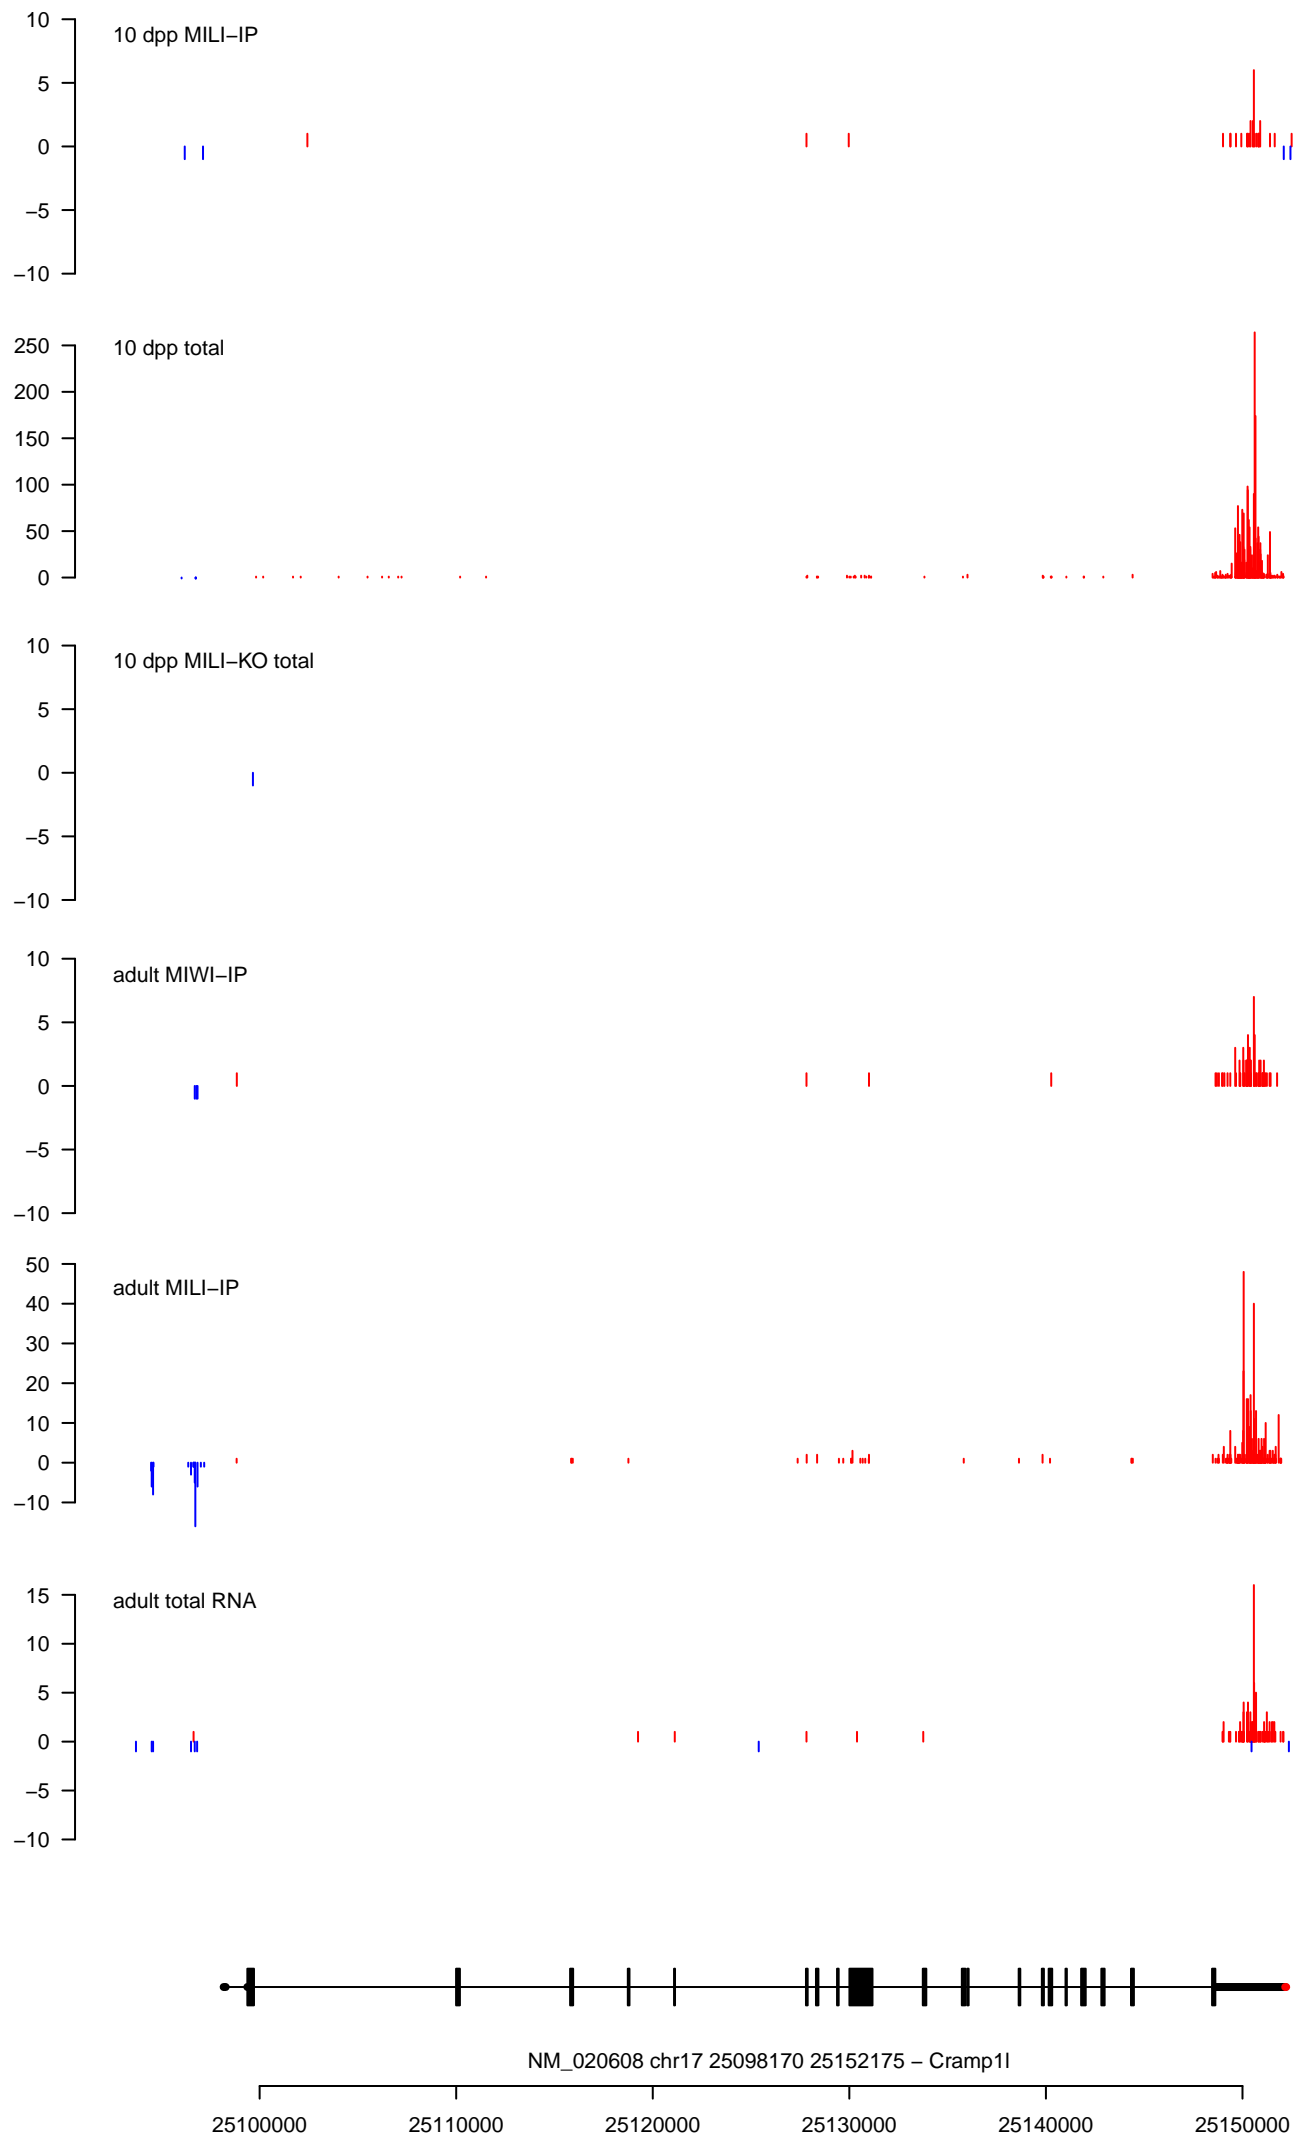

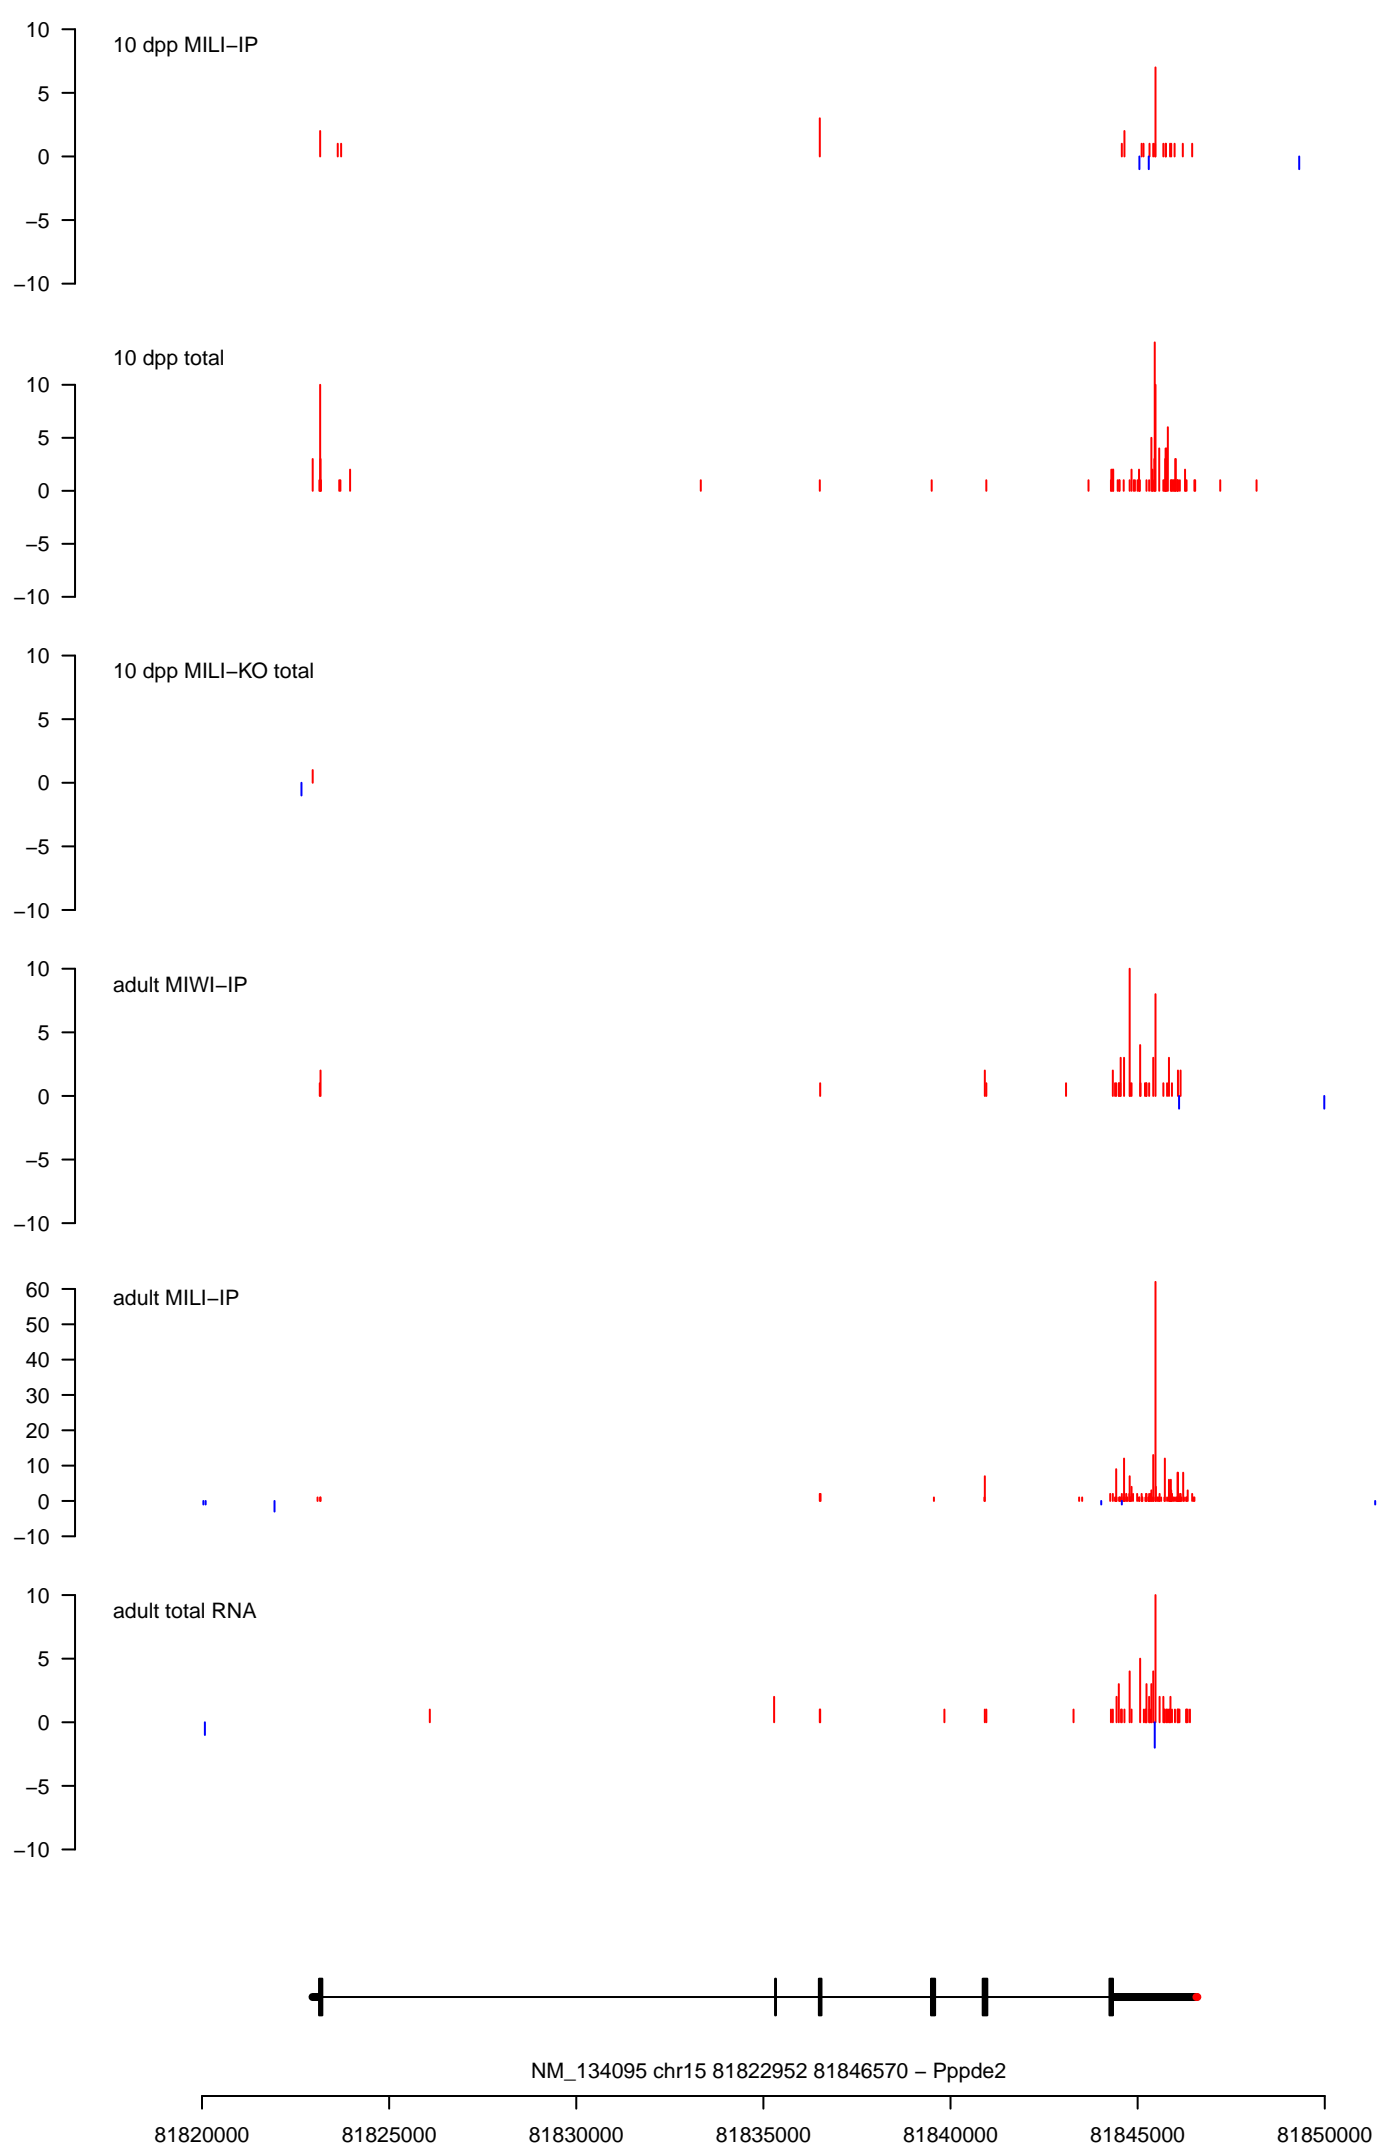

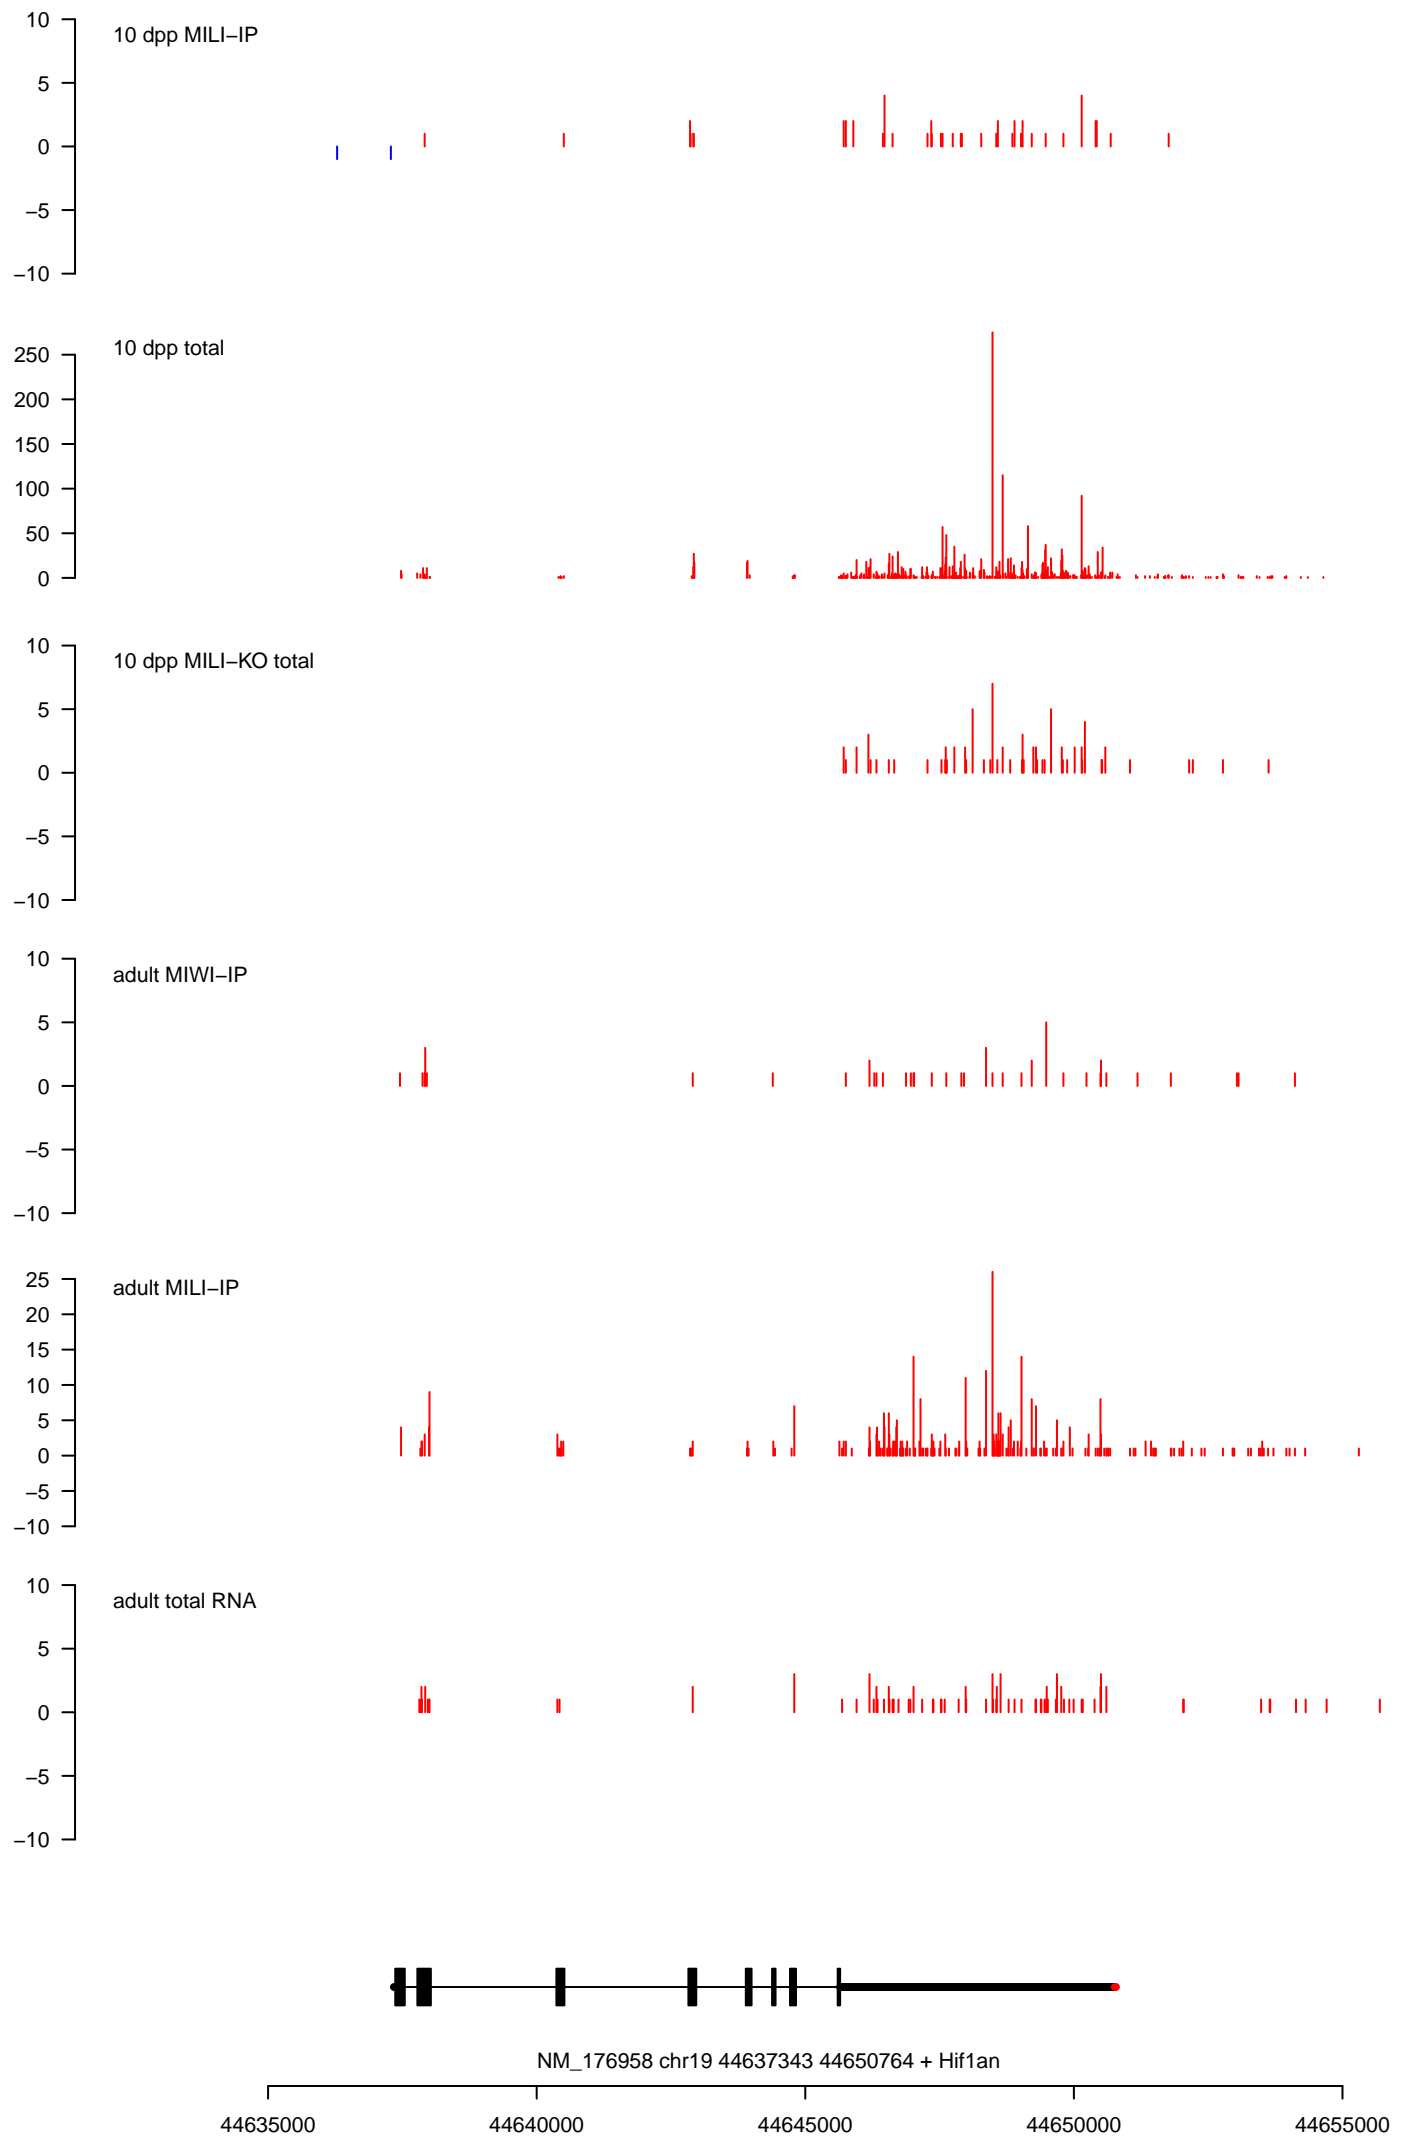

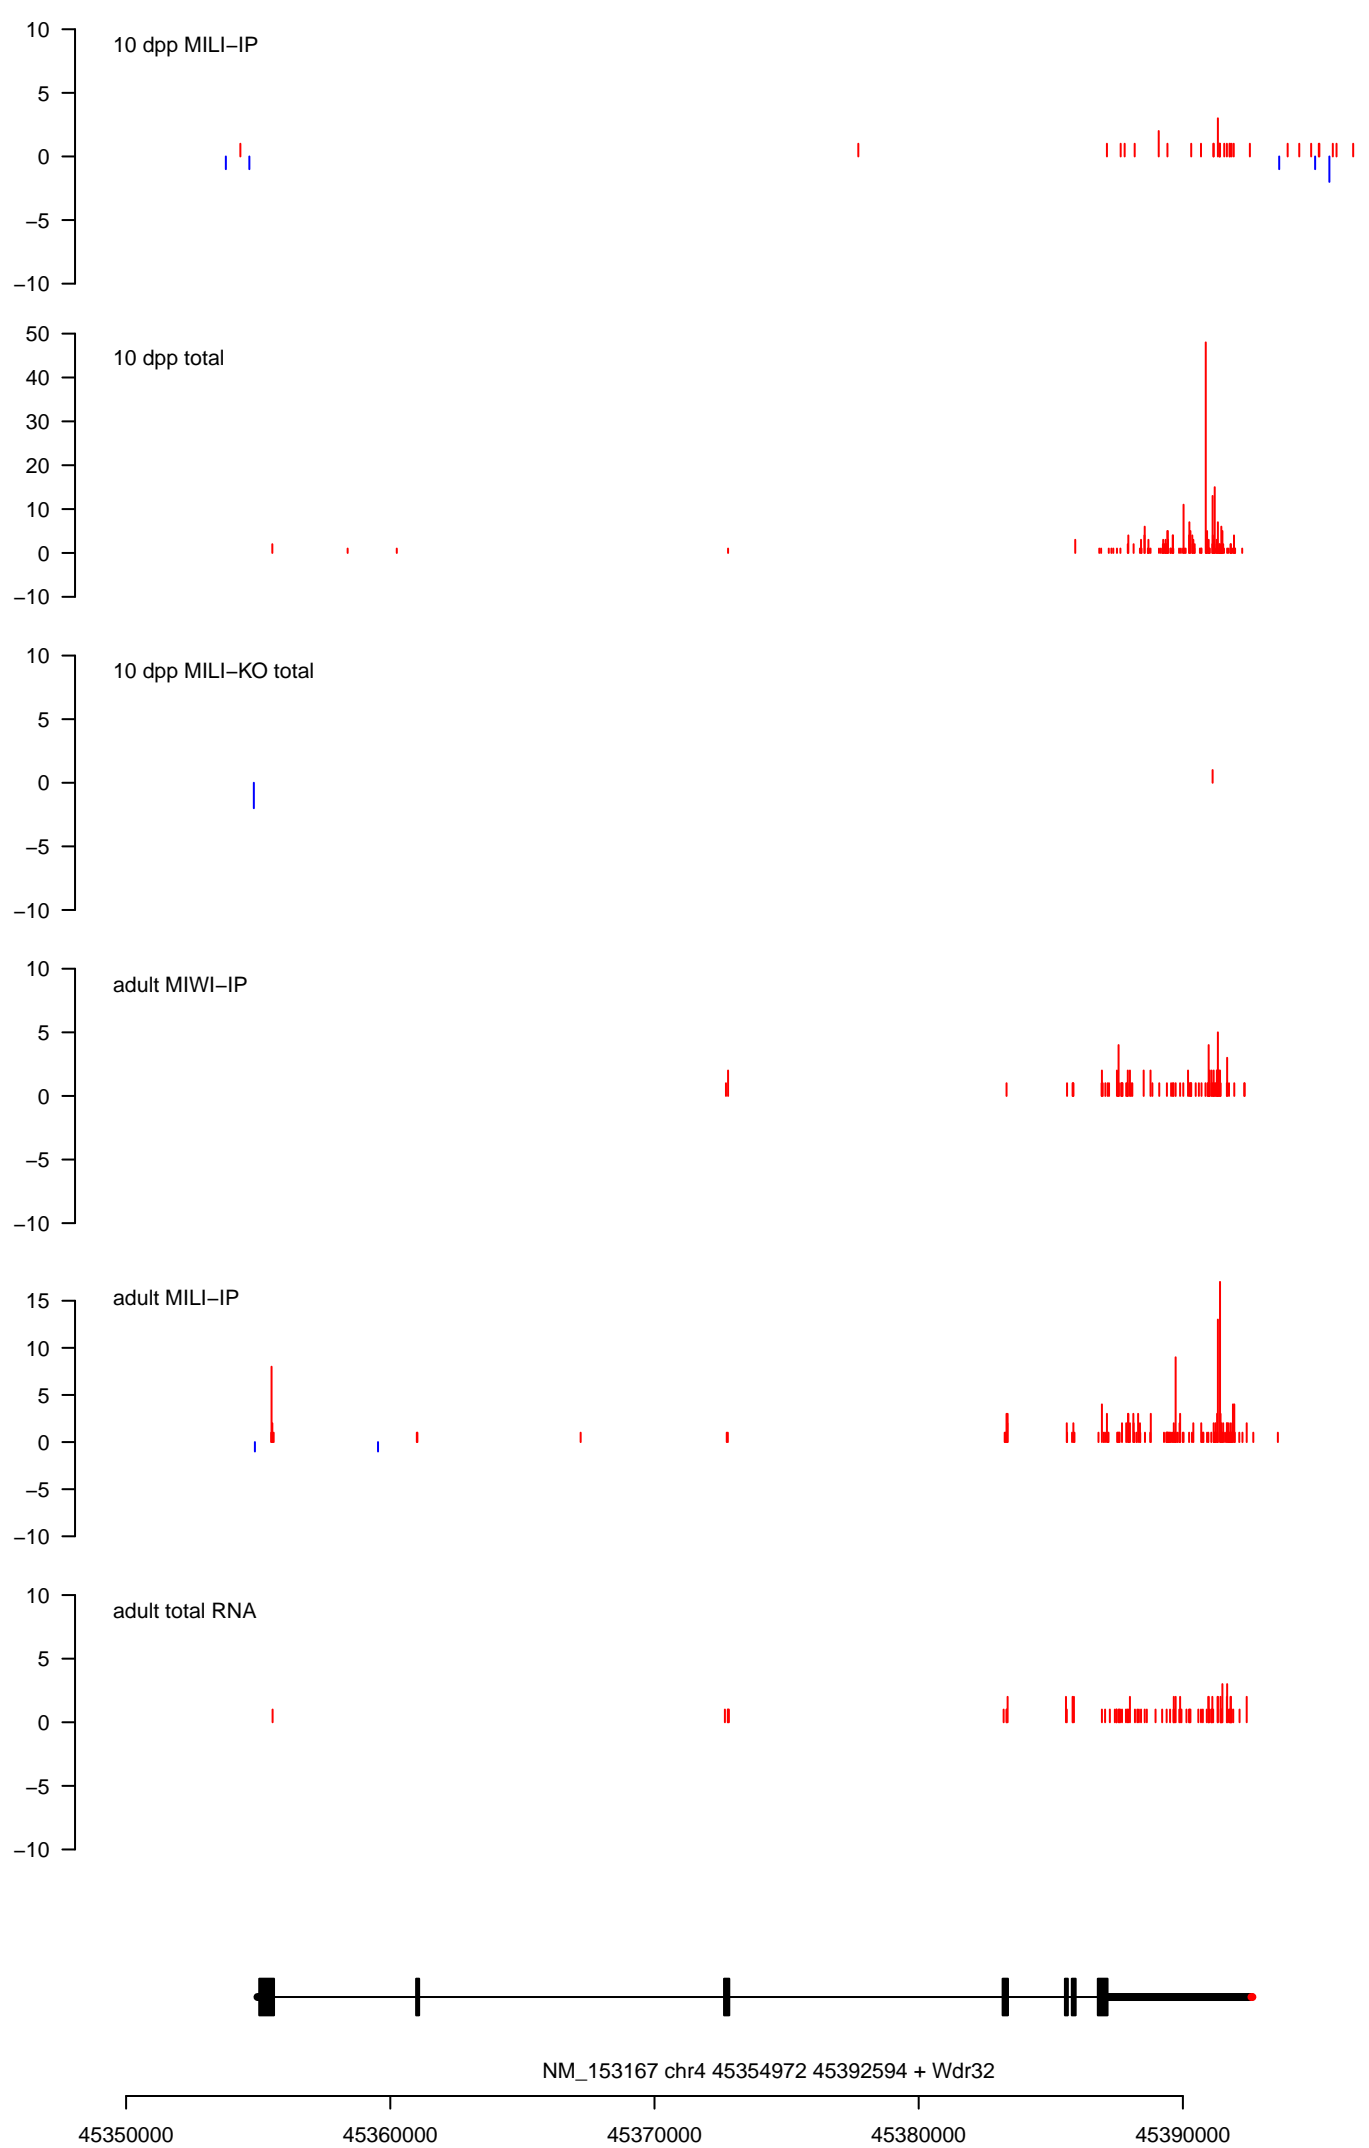

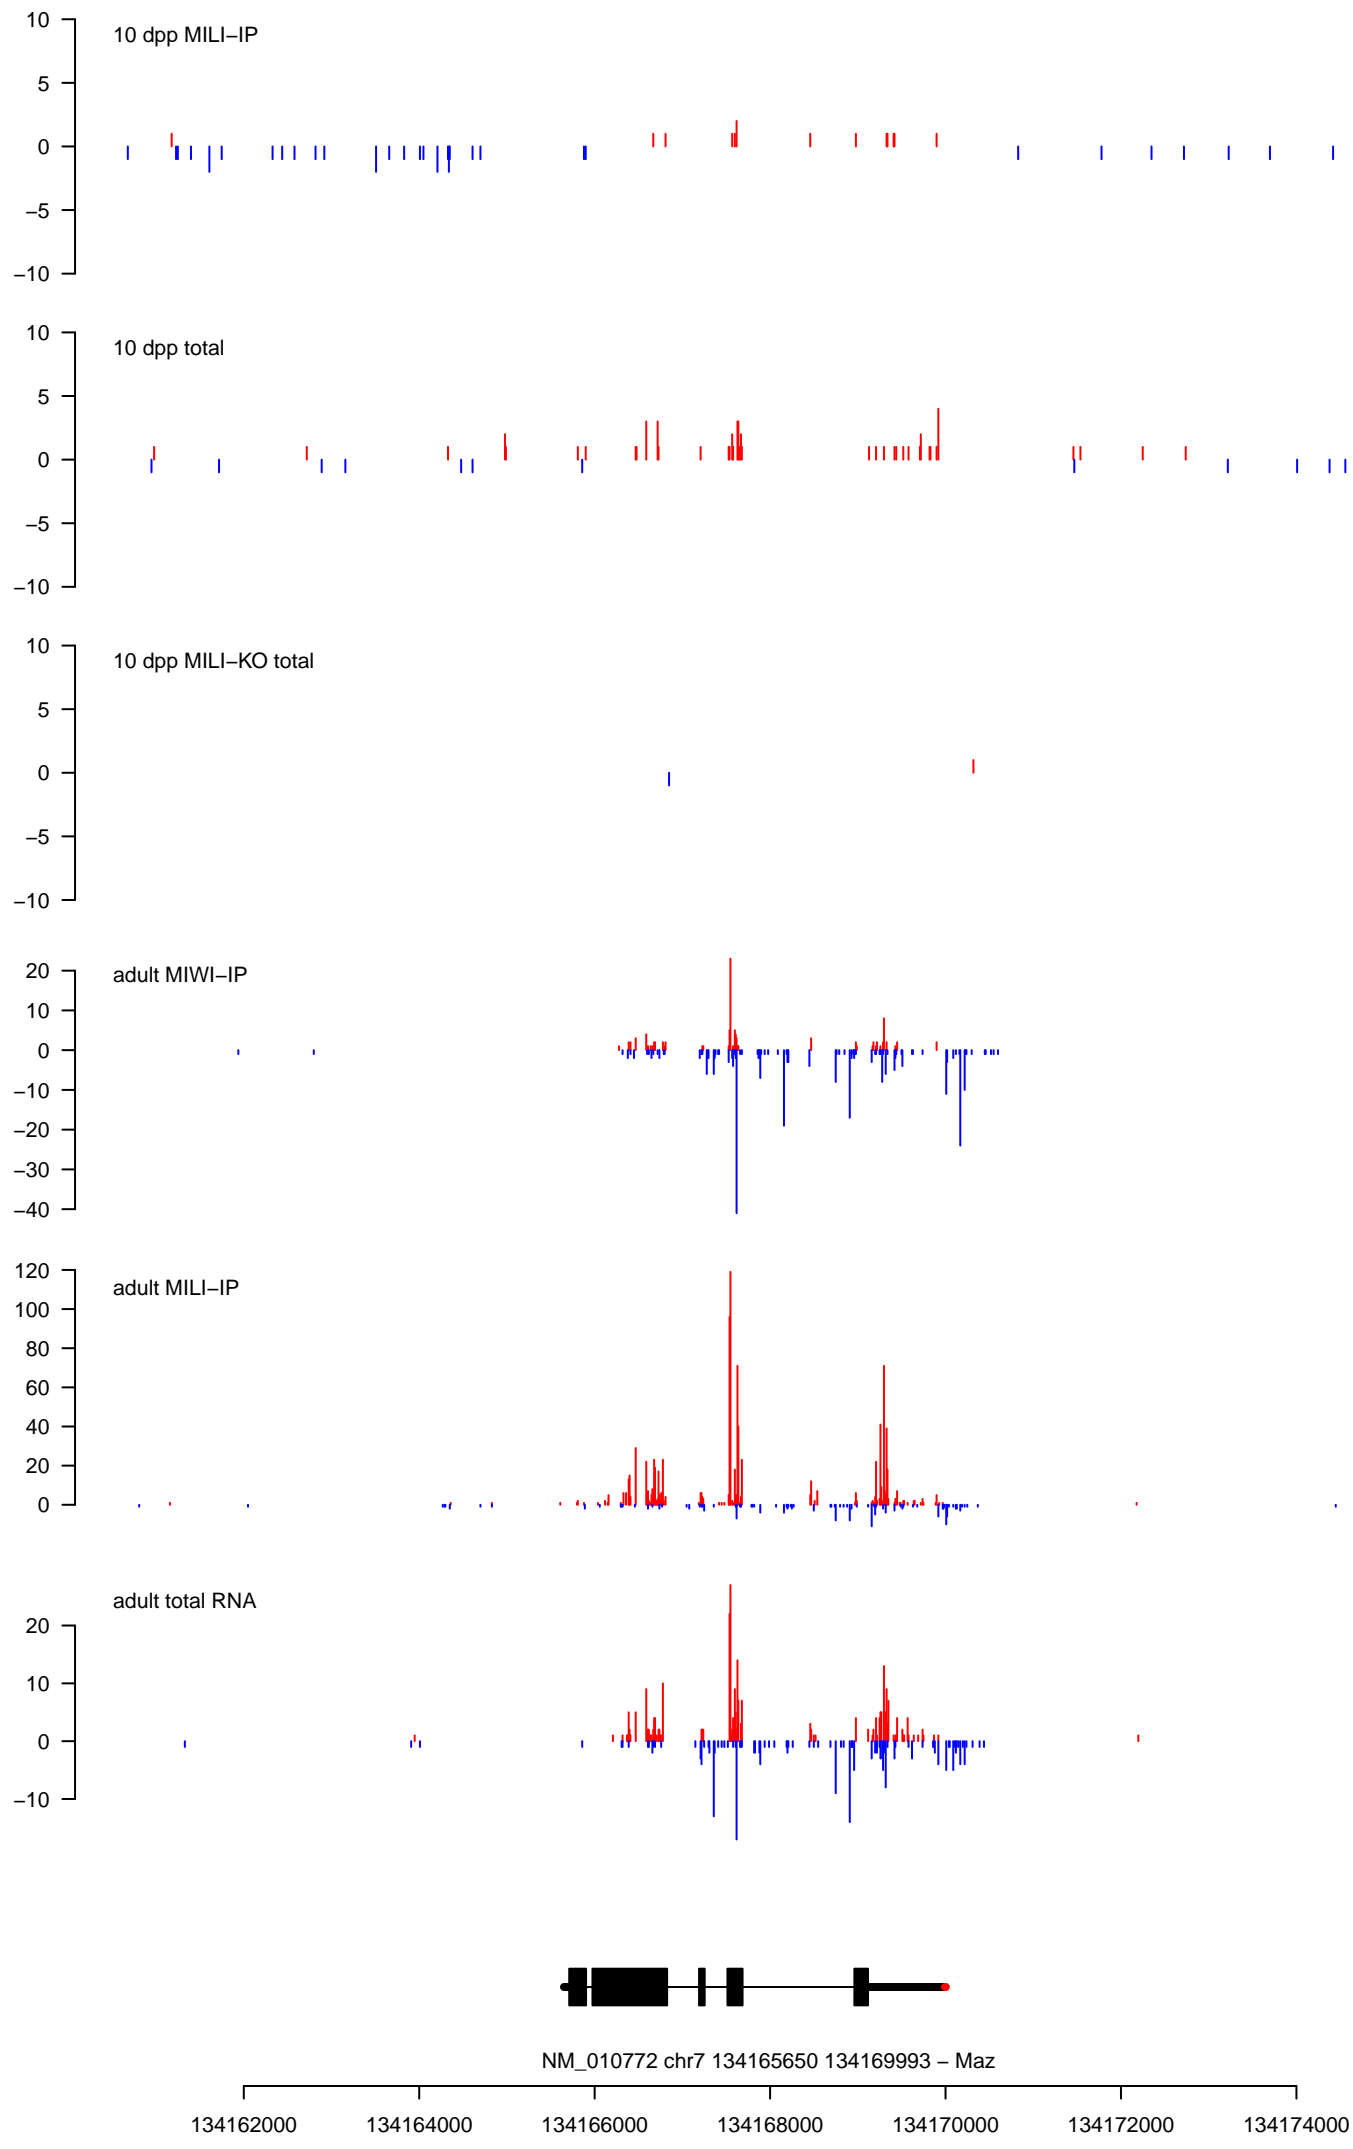



NM\_025454 chr1 95700541 95718677 + Ing5



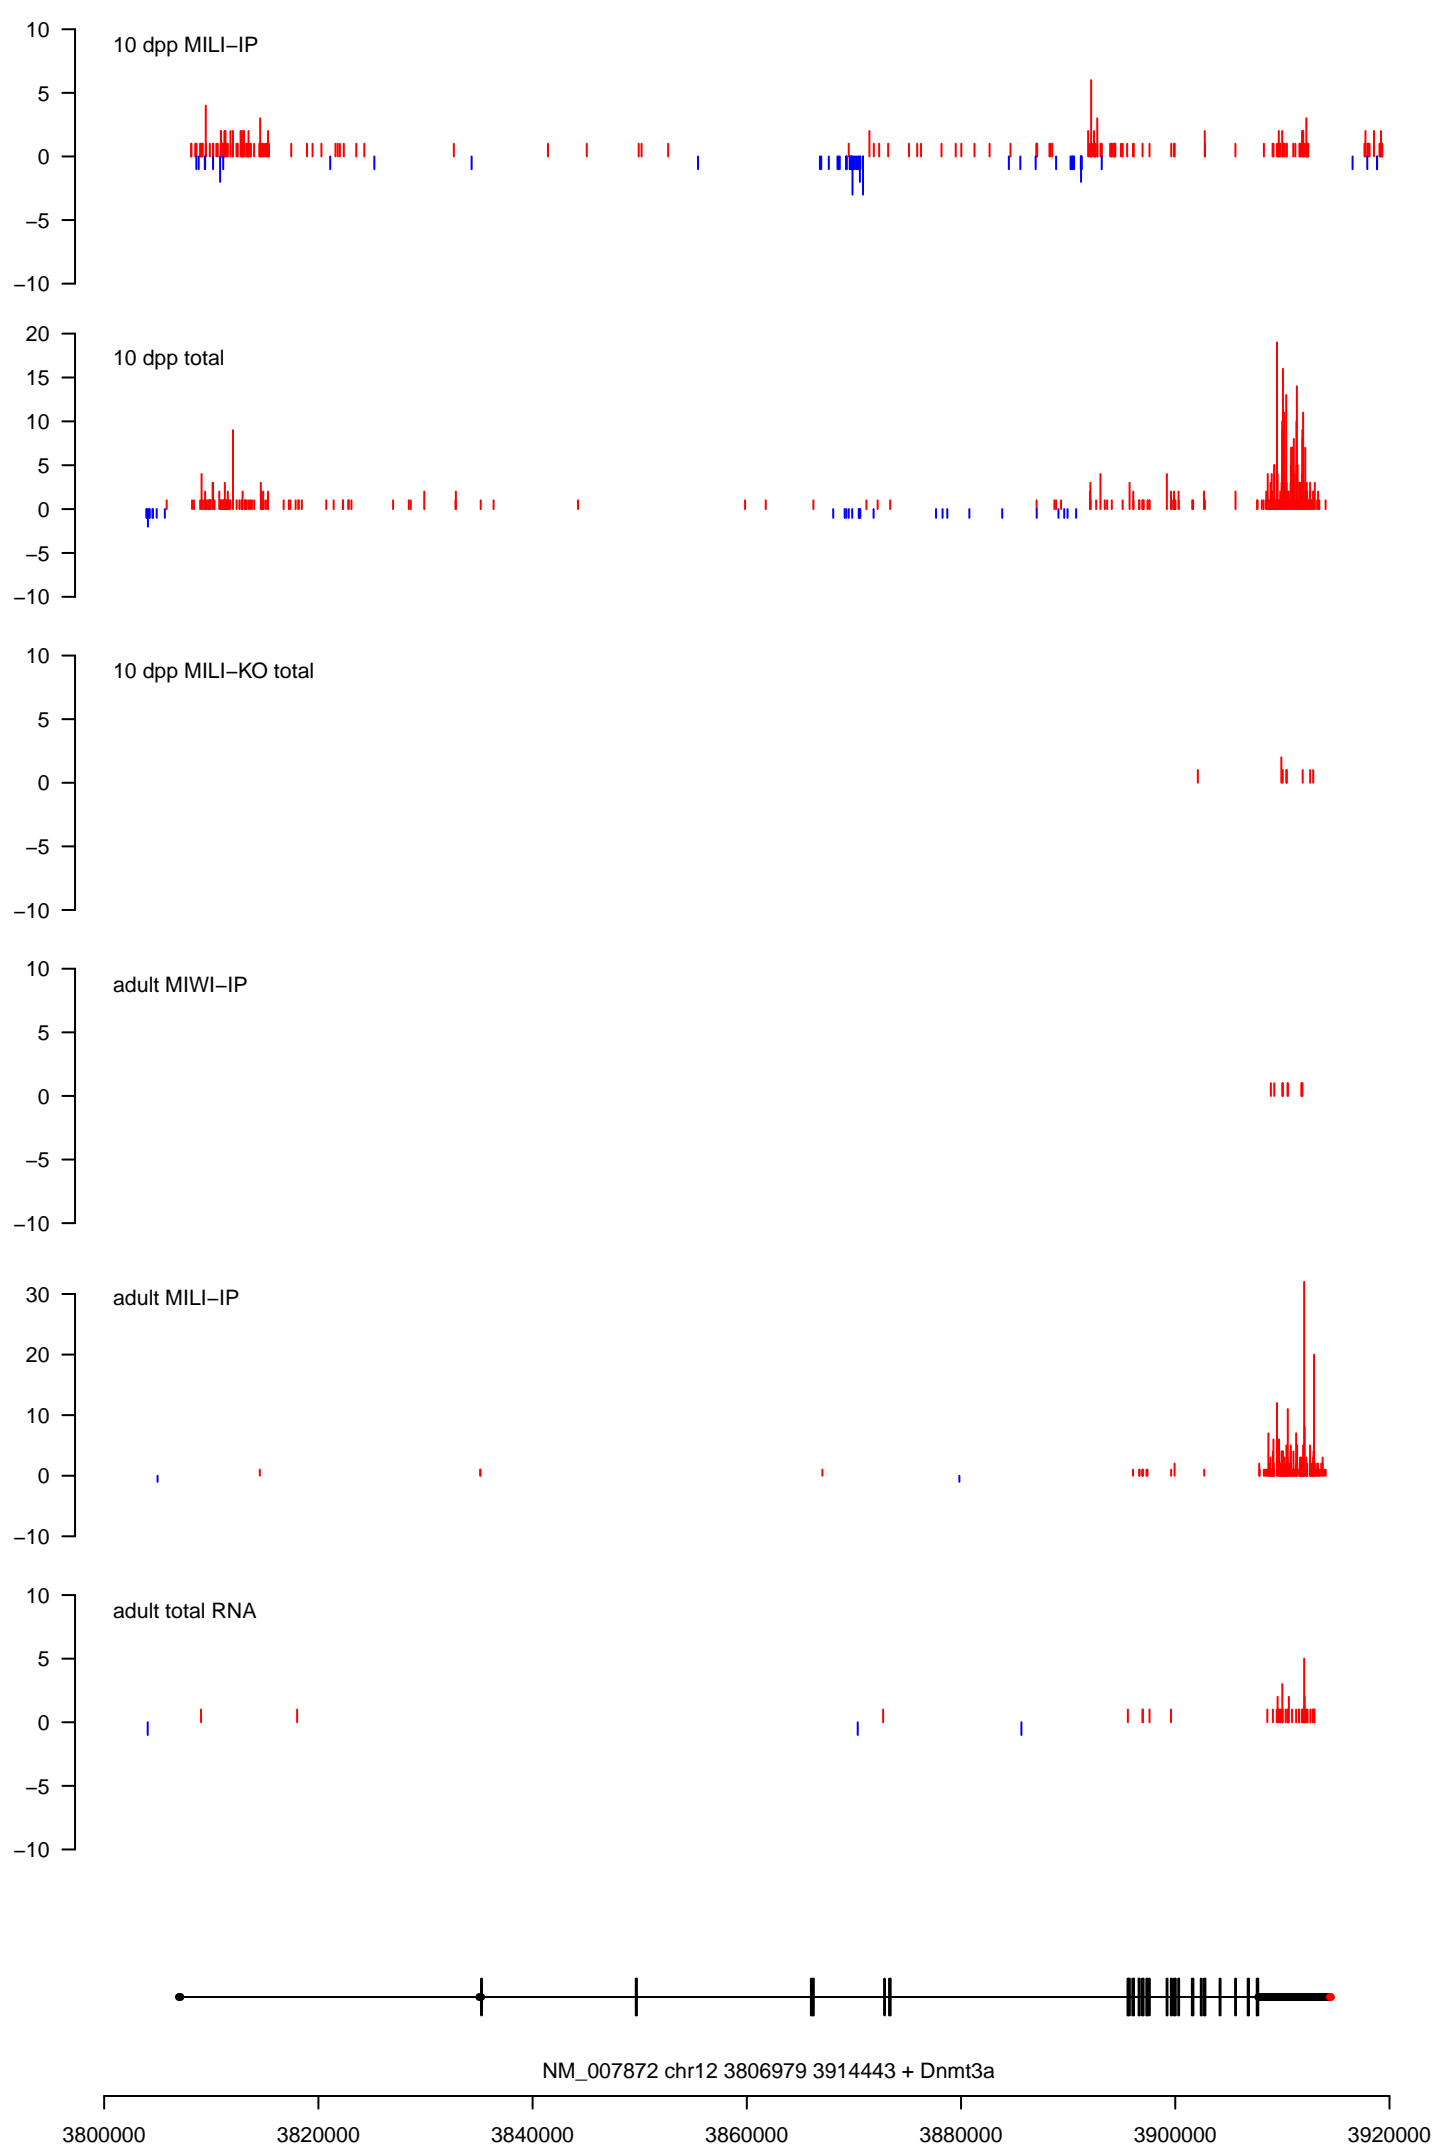



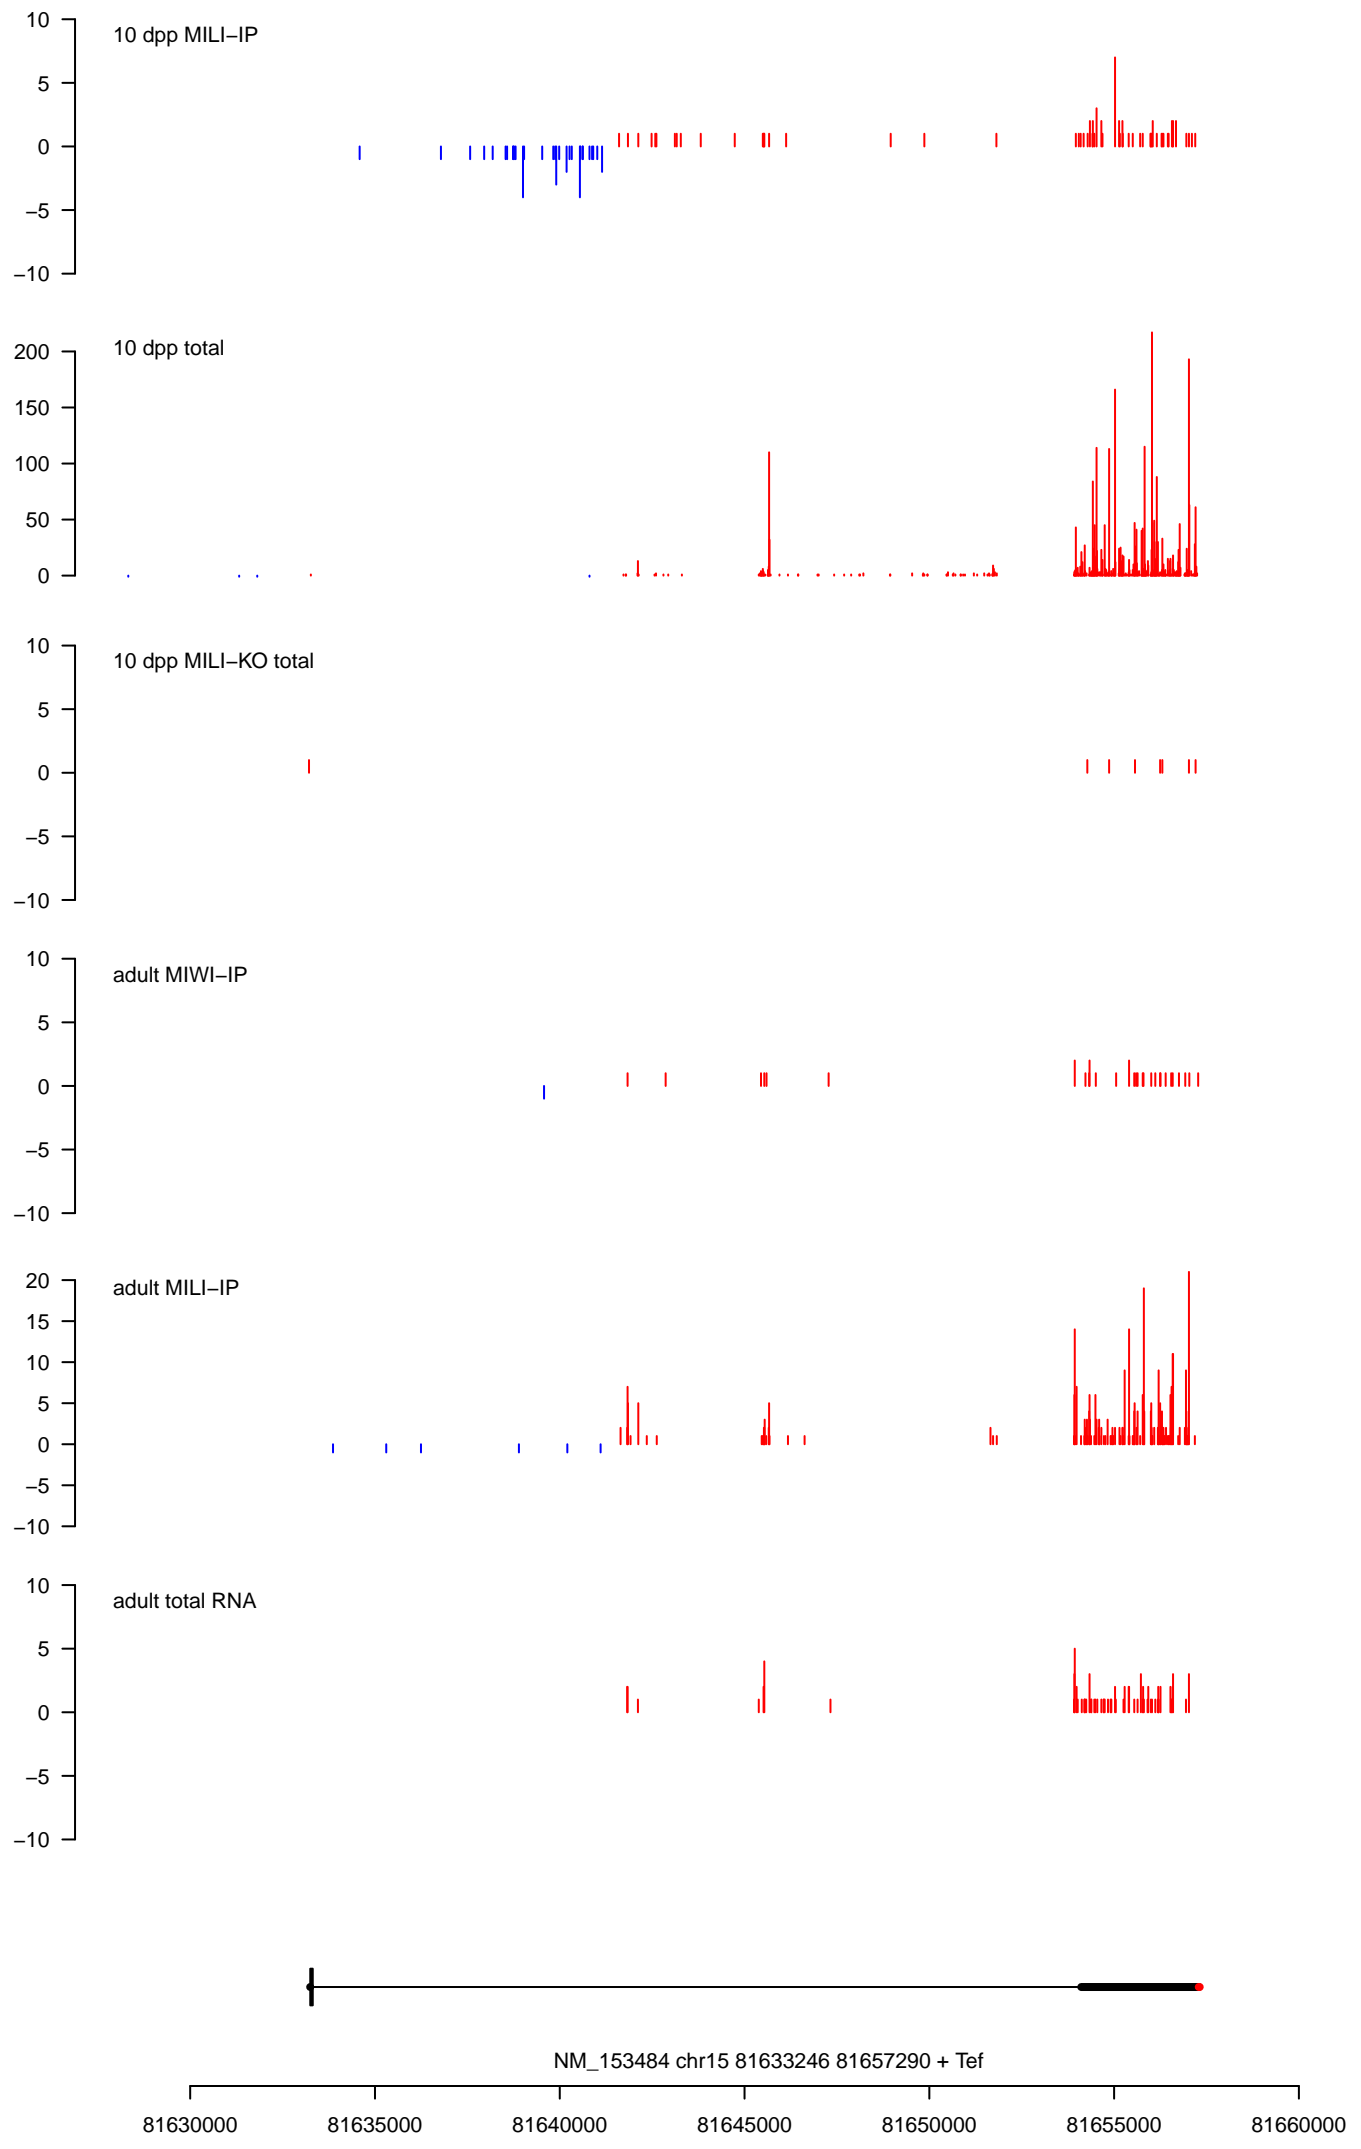



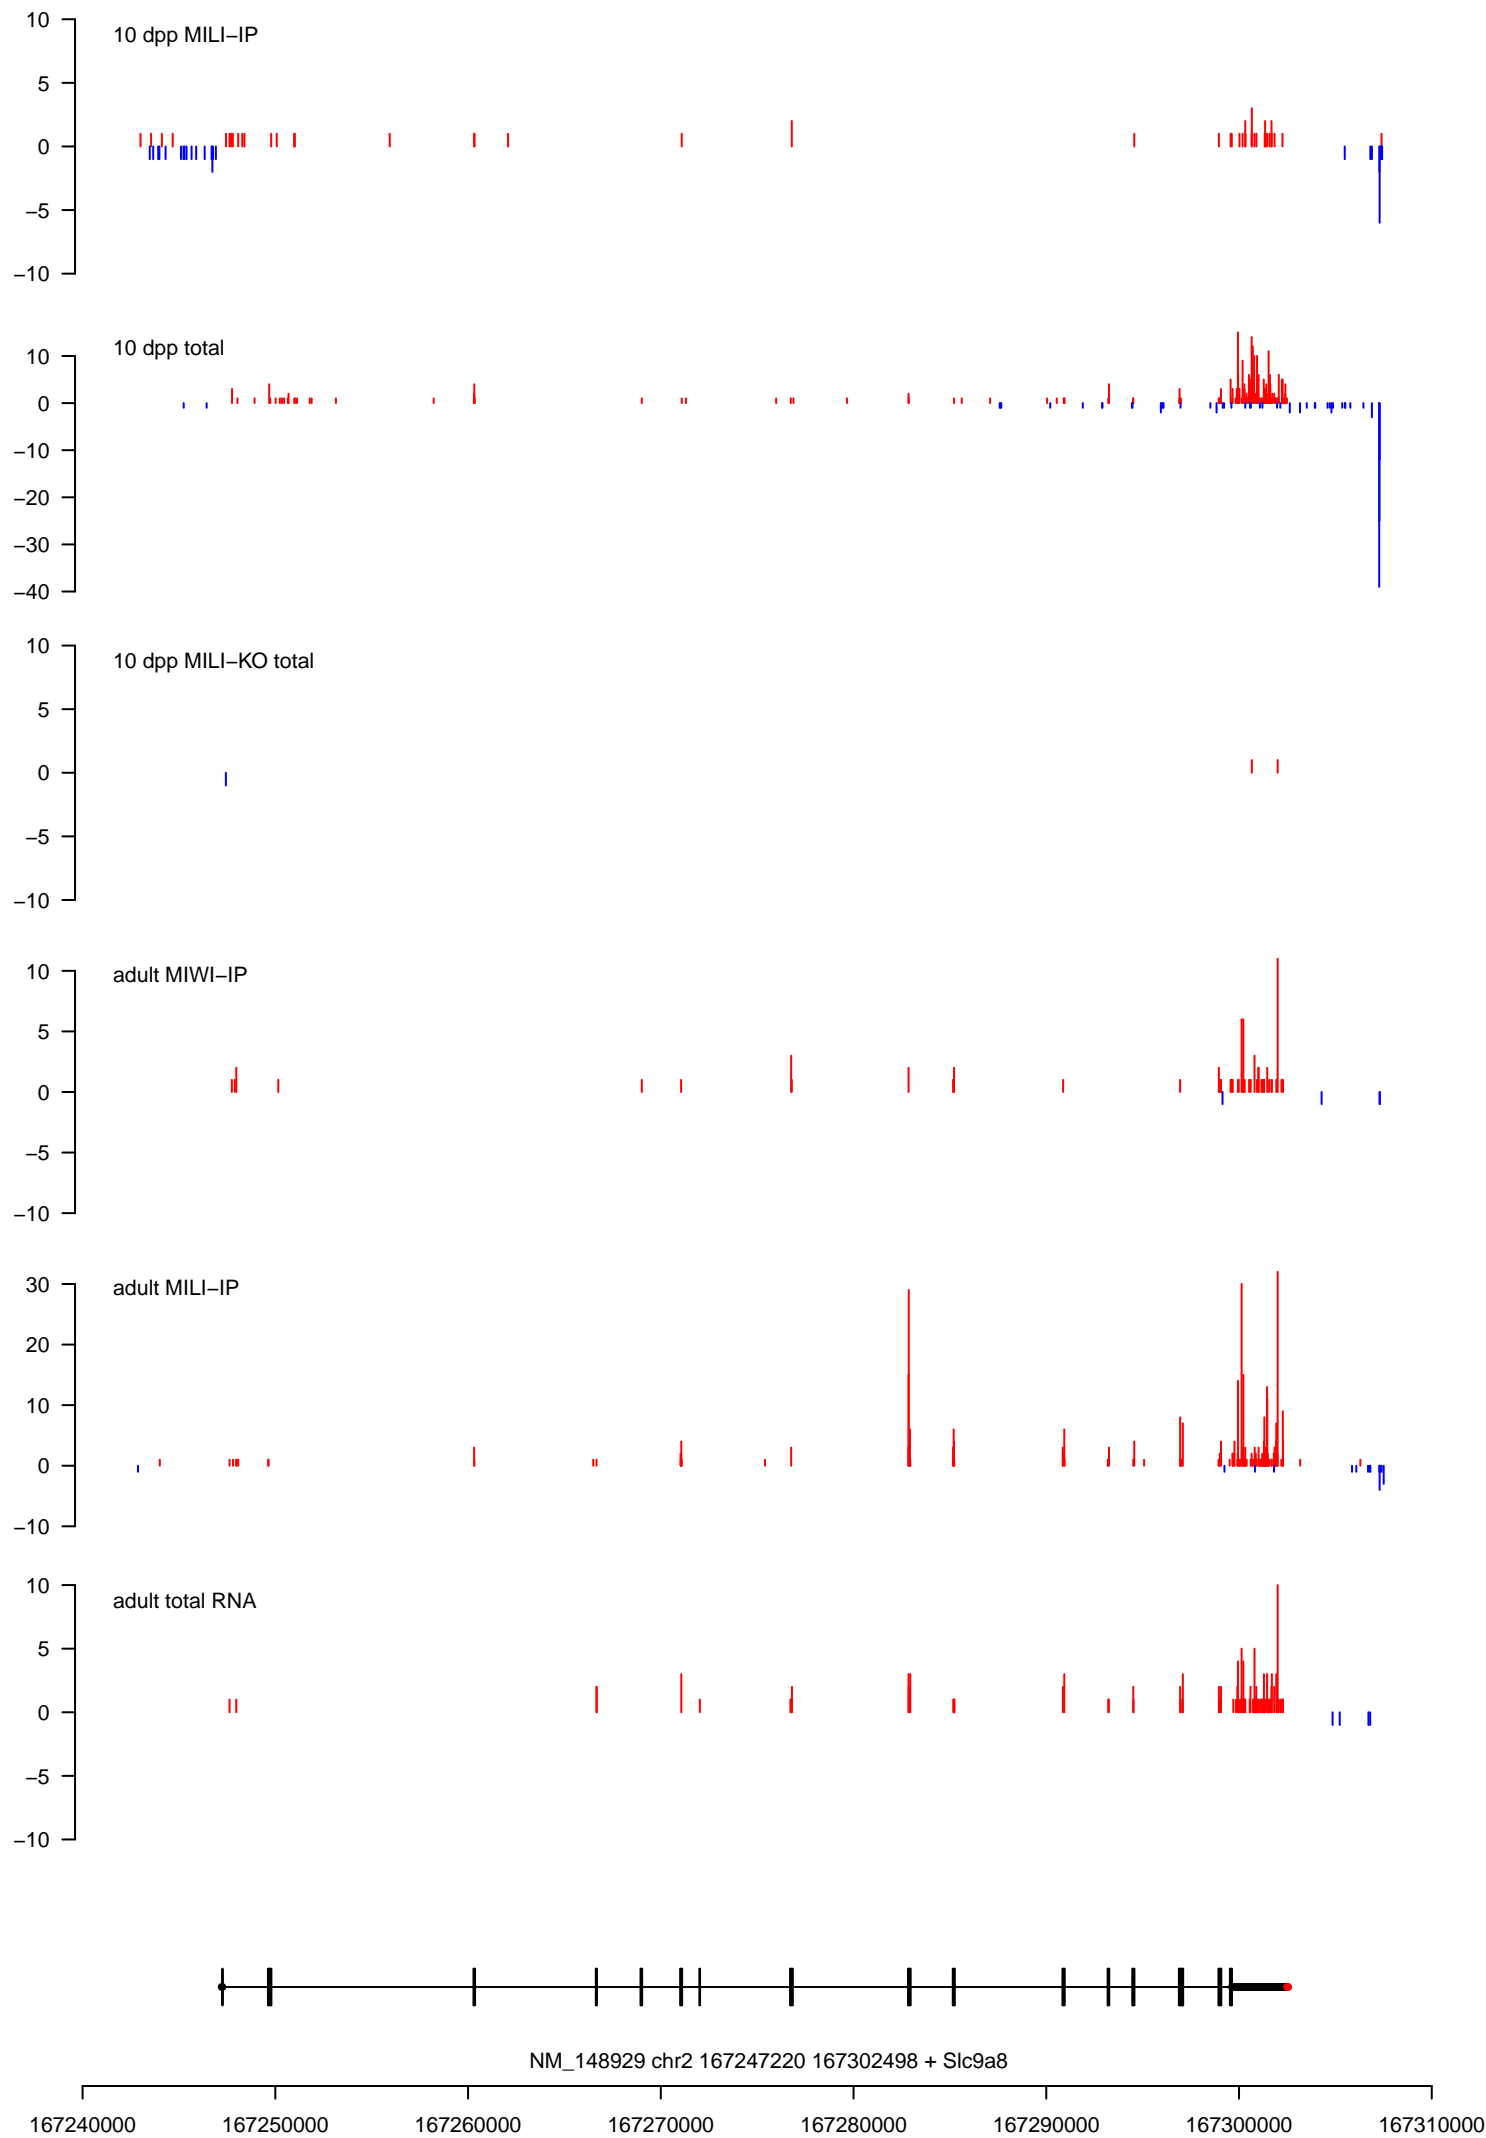

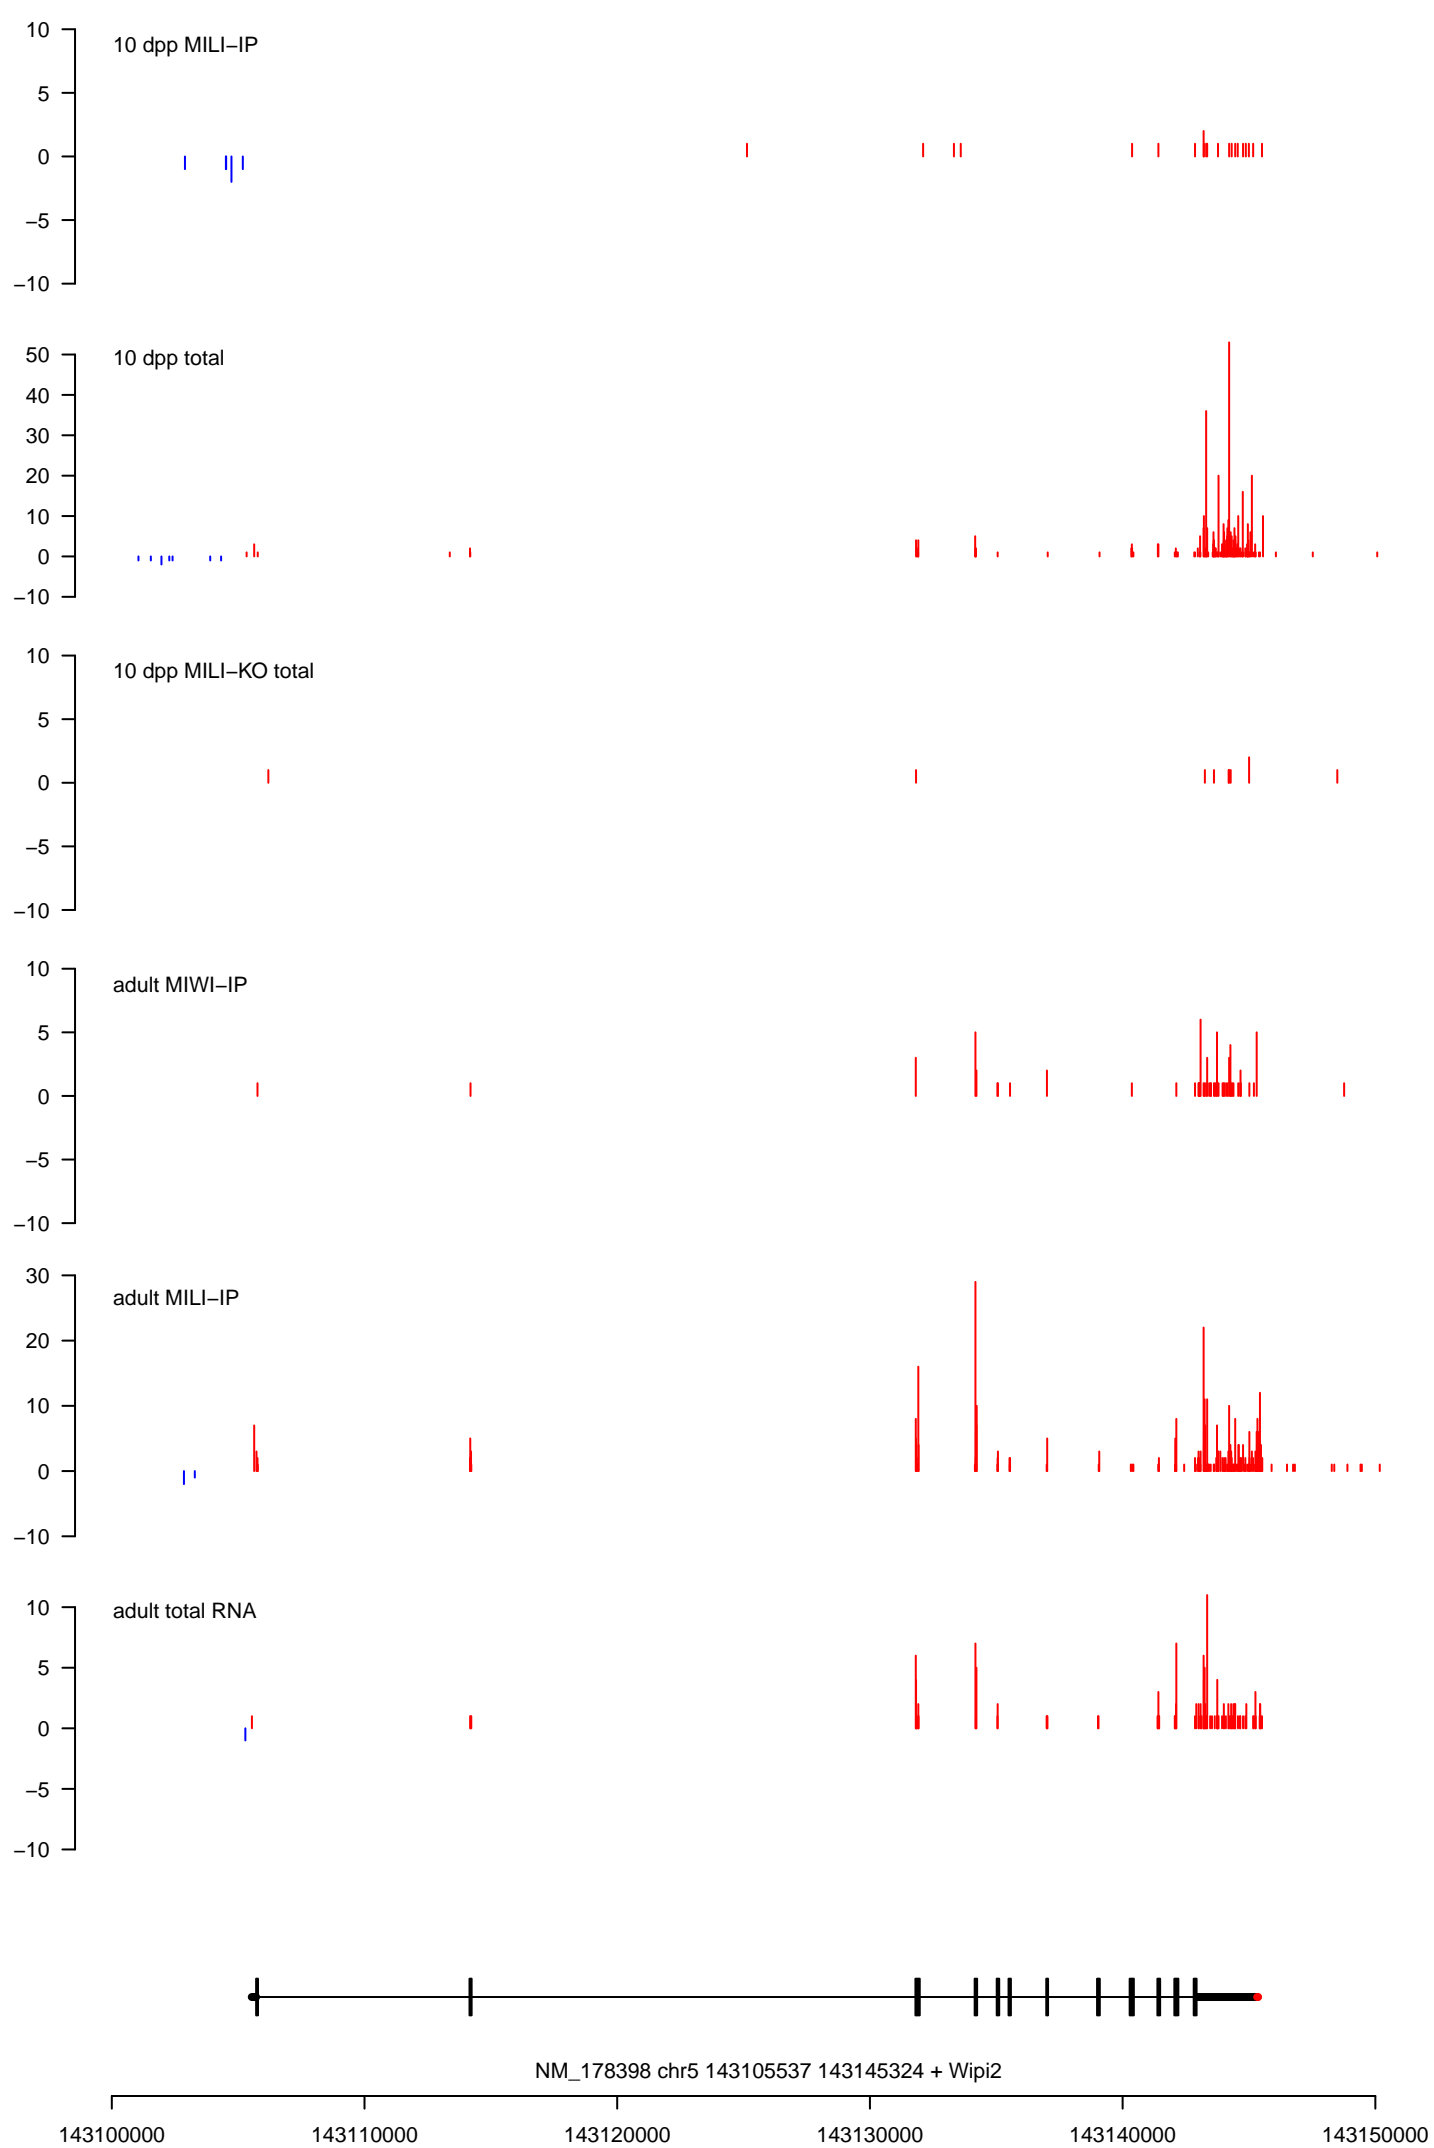

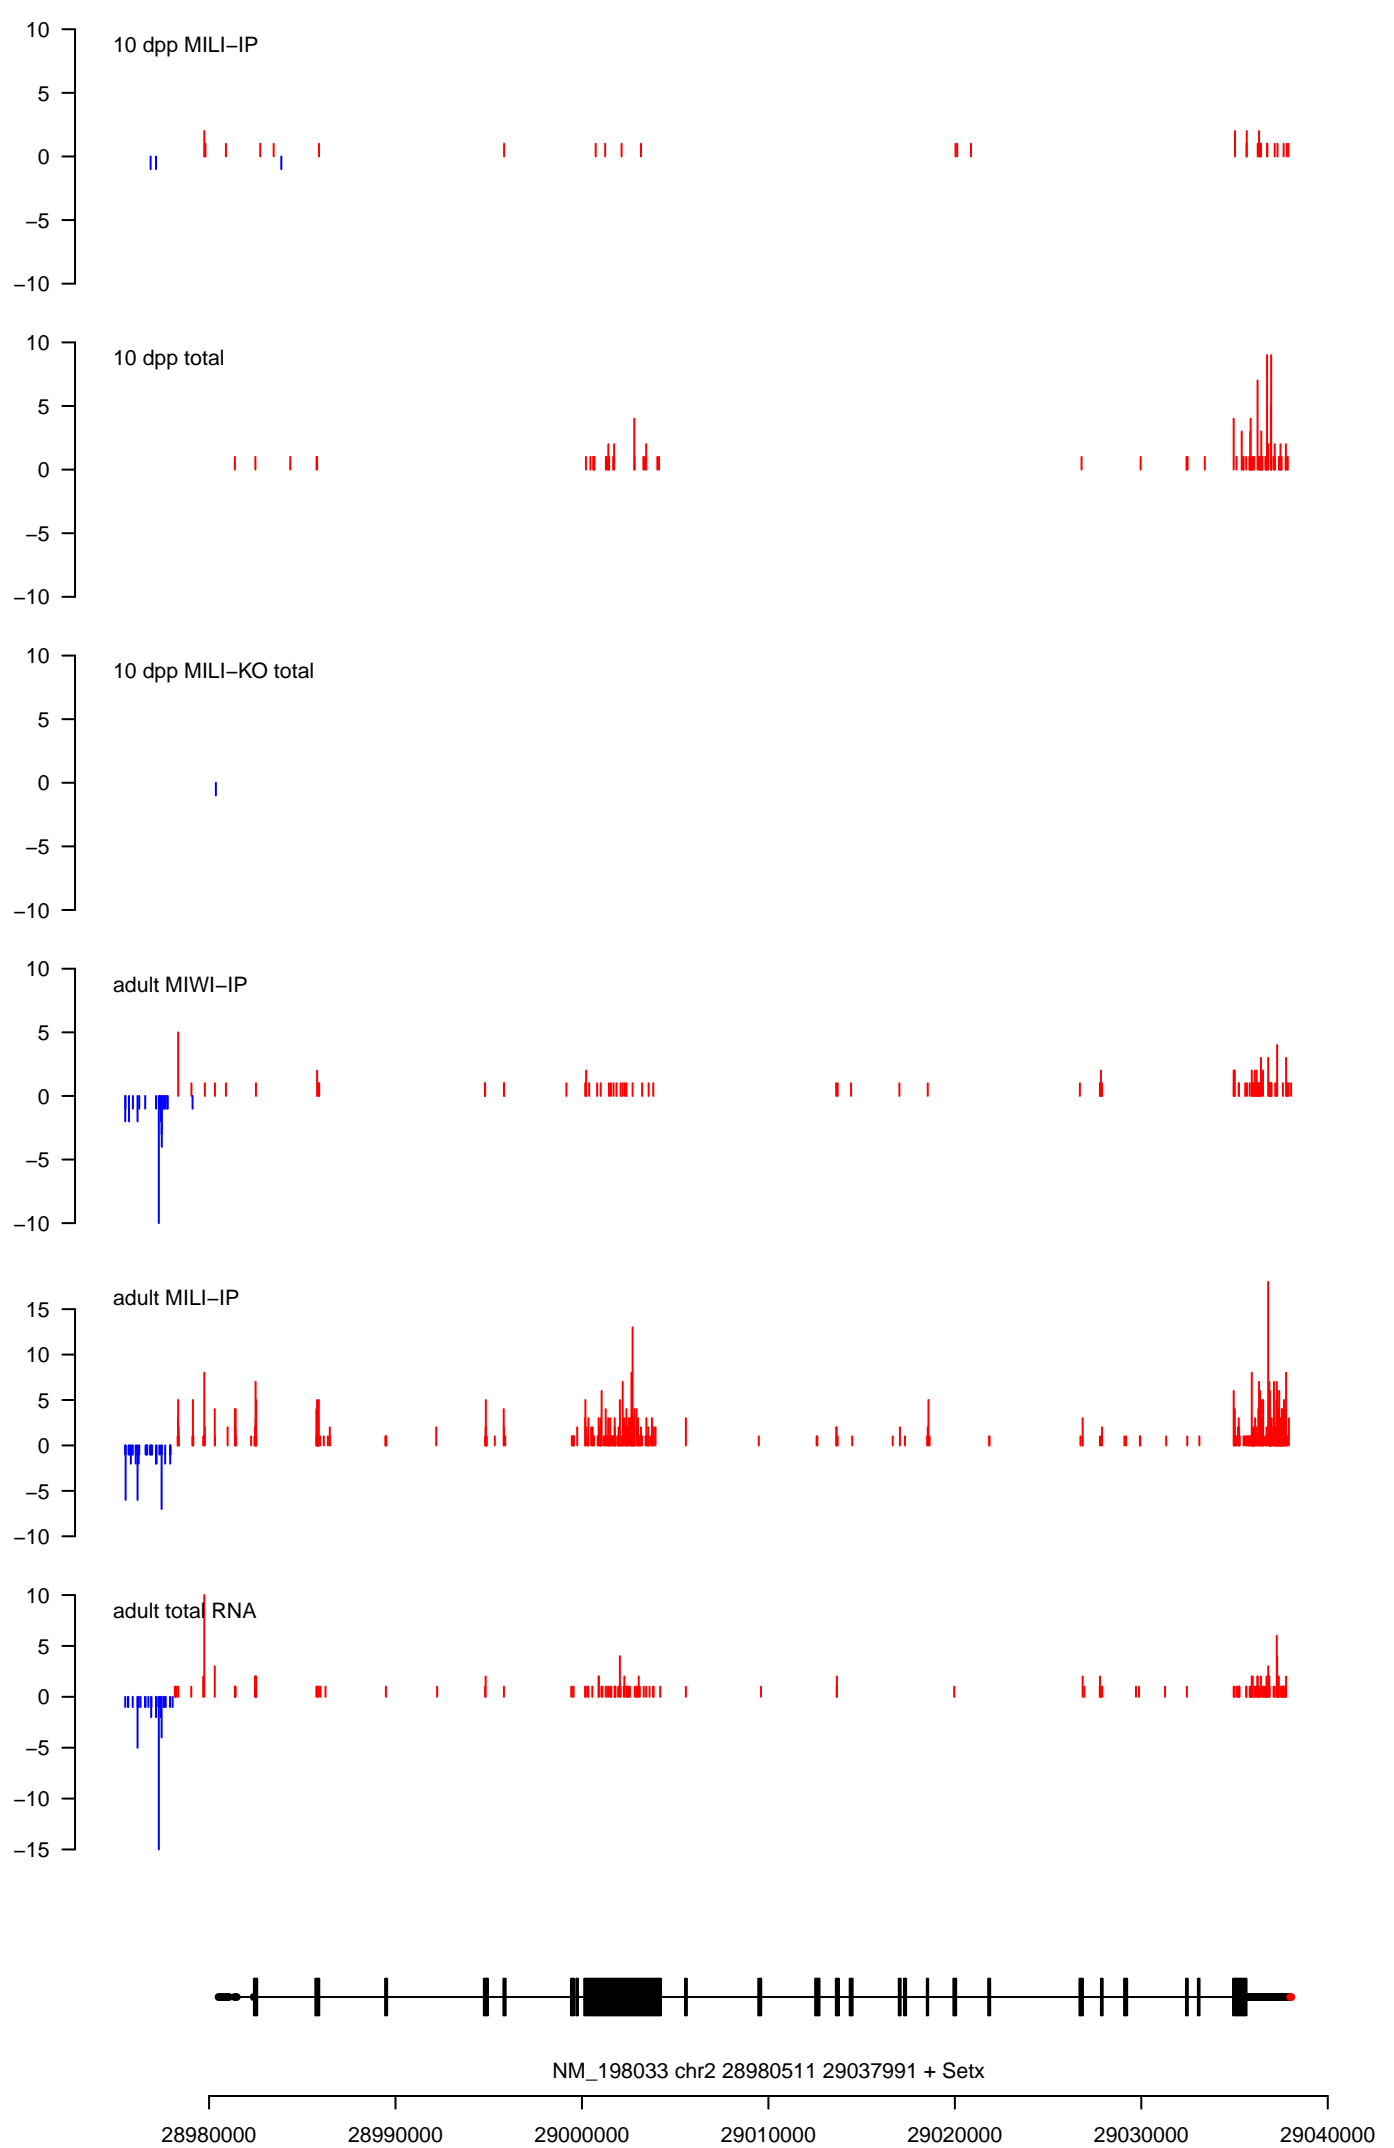

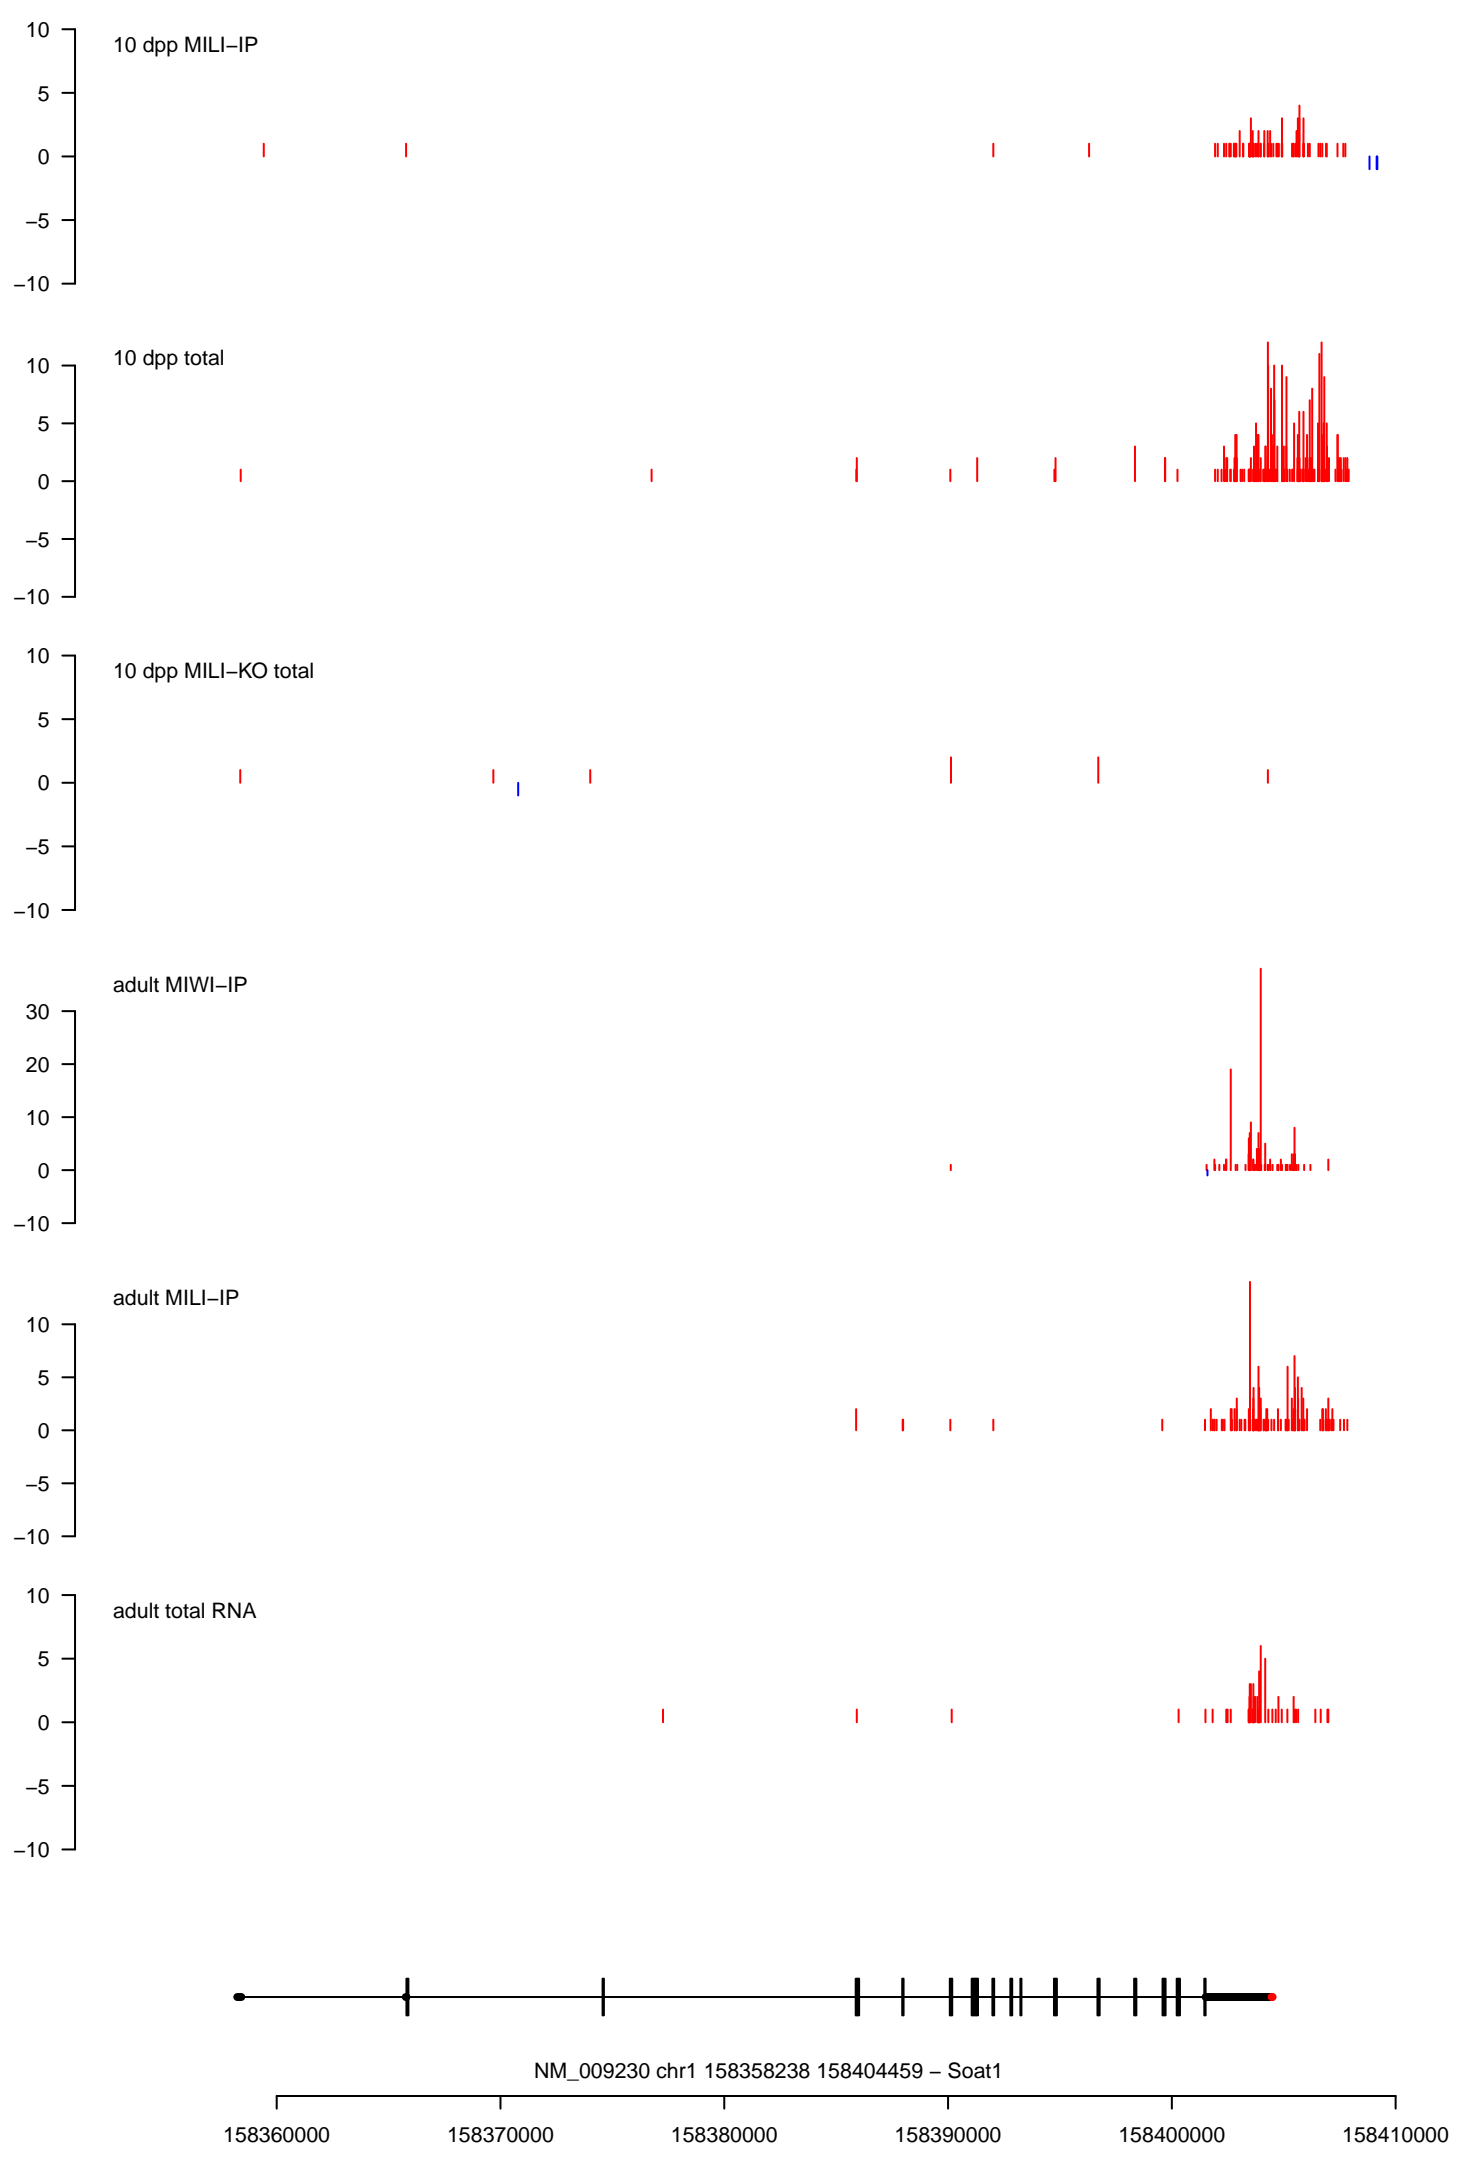

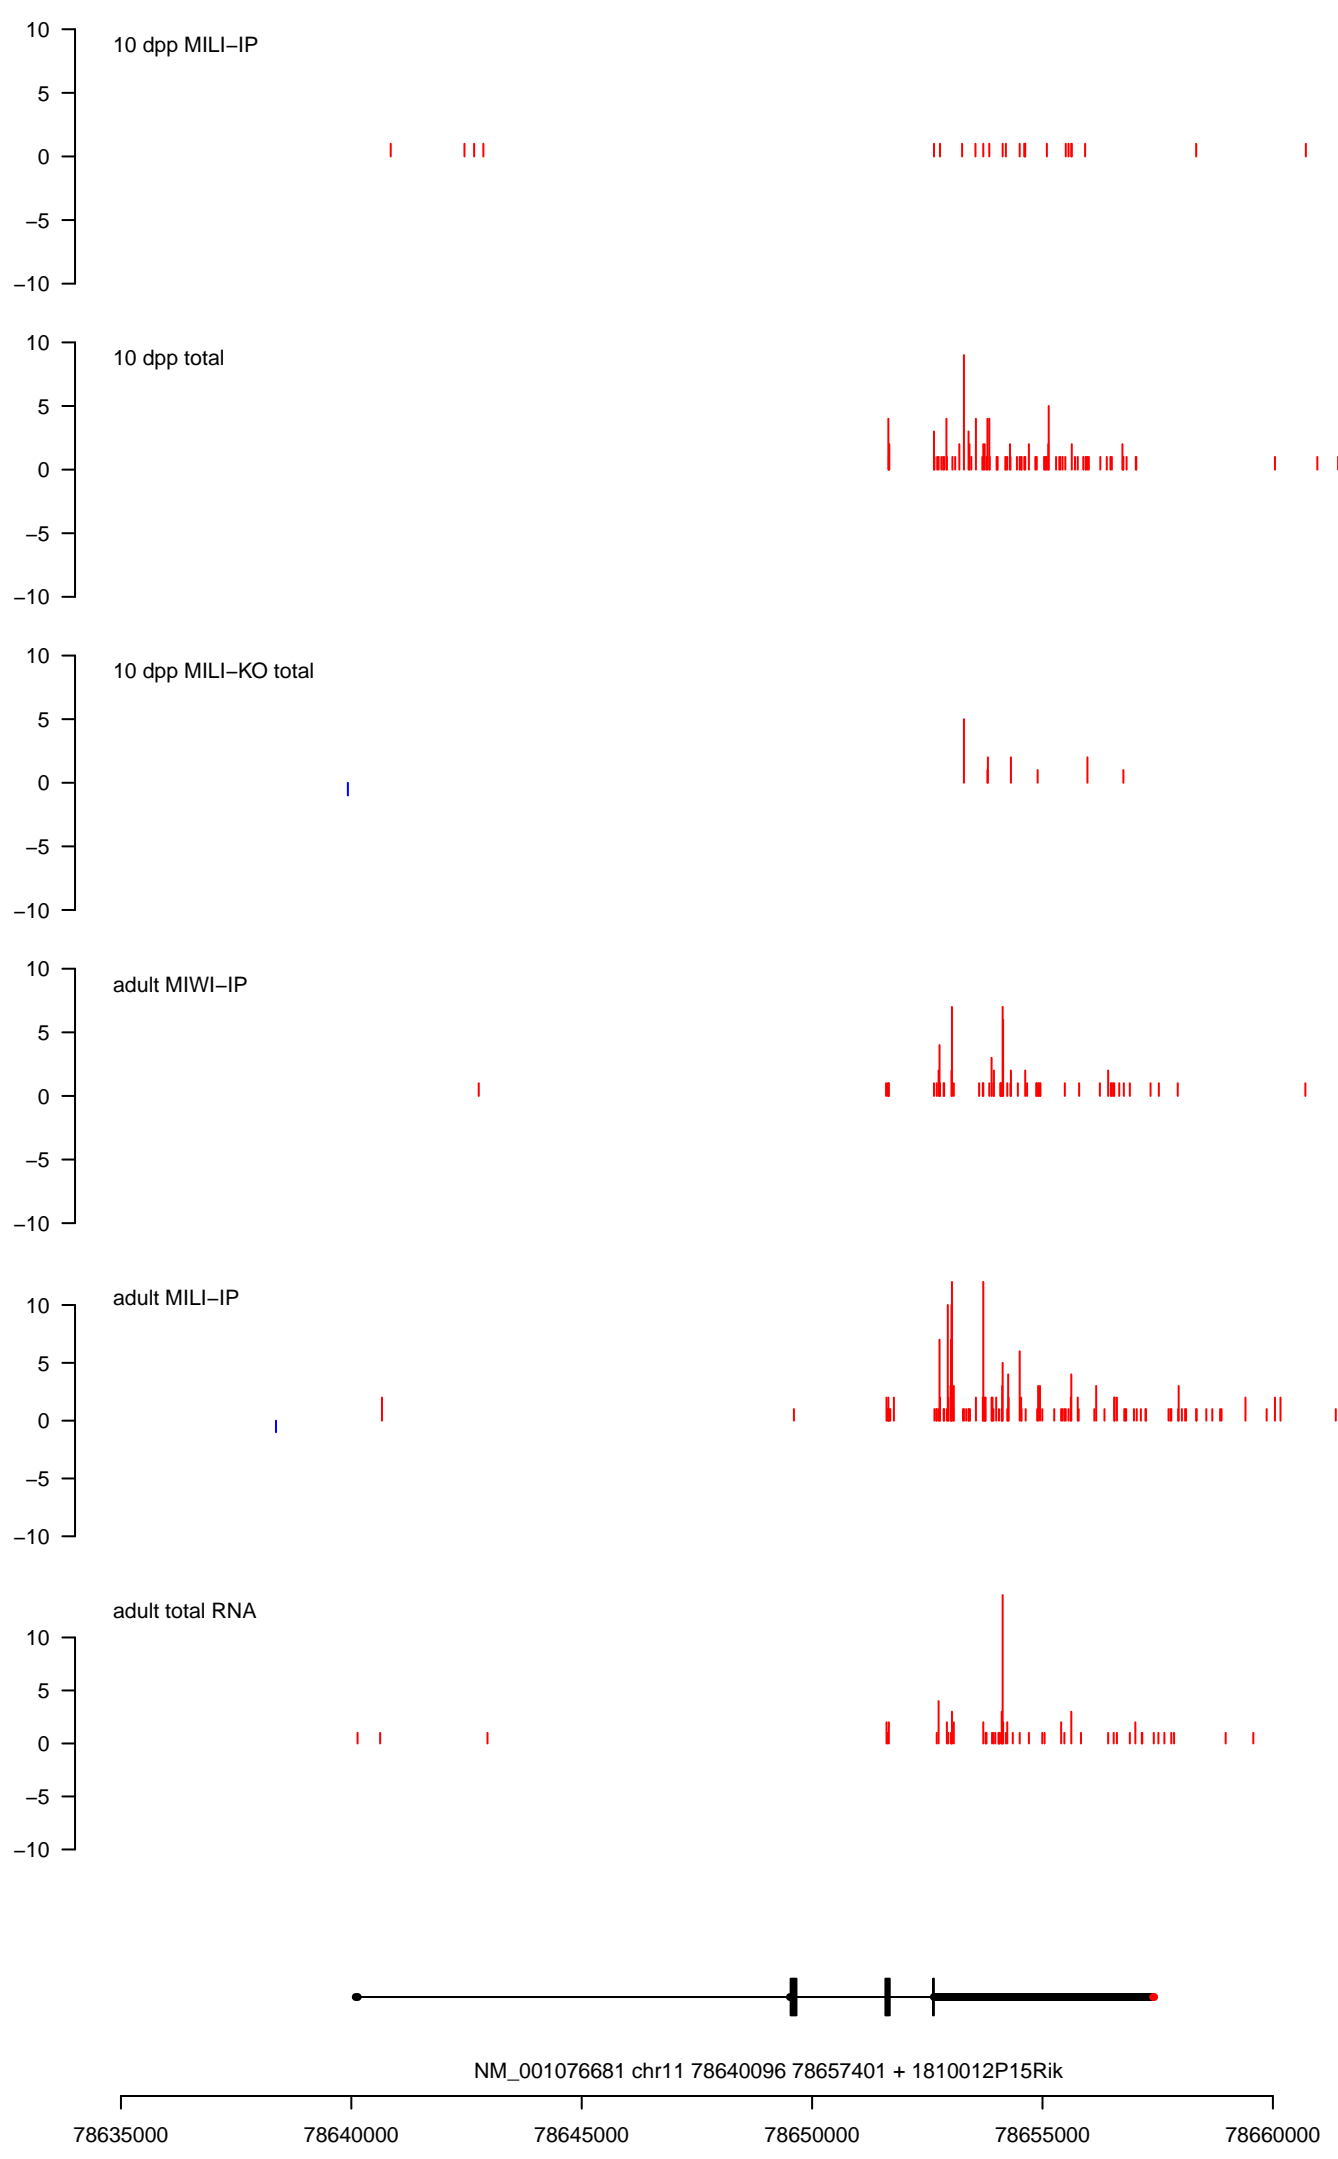

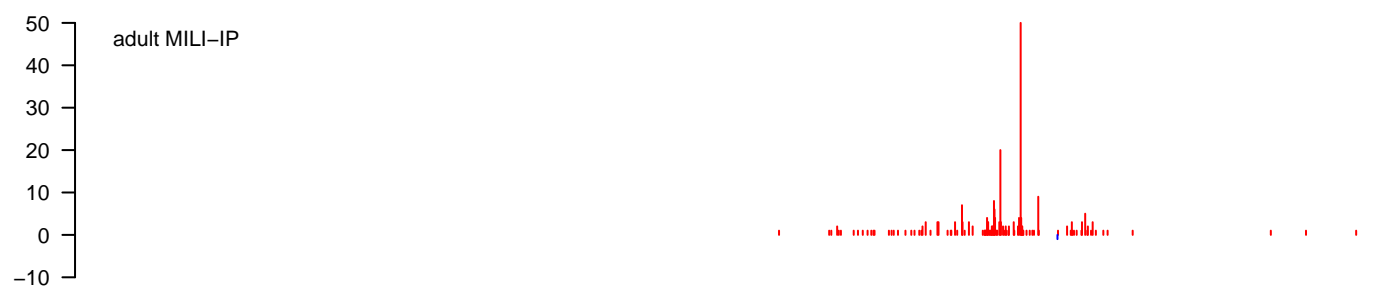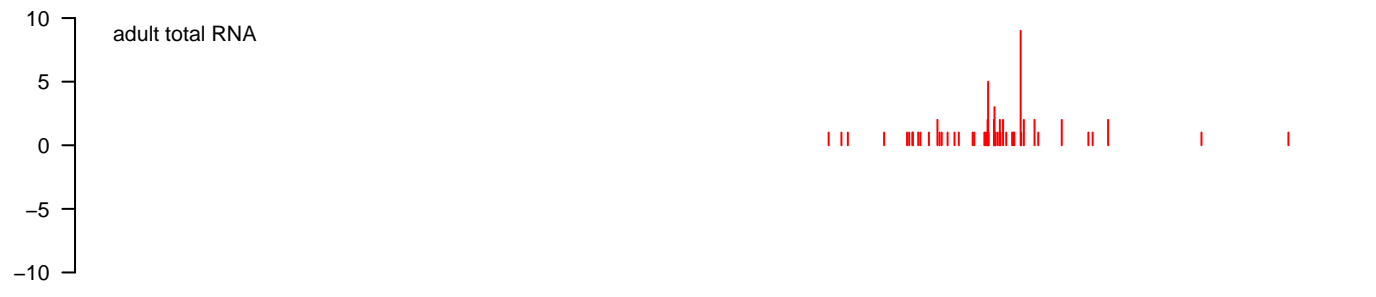

NM\_177899 chr8 72285222 72298810 - D330038O06Rik

72280000 72285000 72290000 72295000 72300000



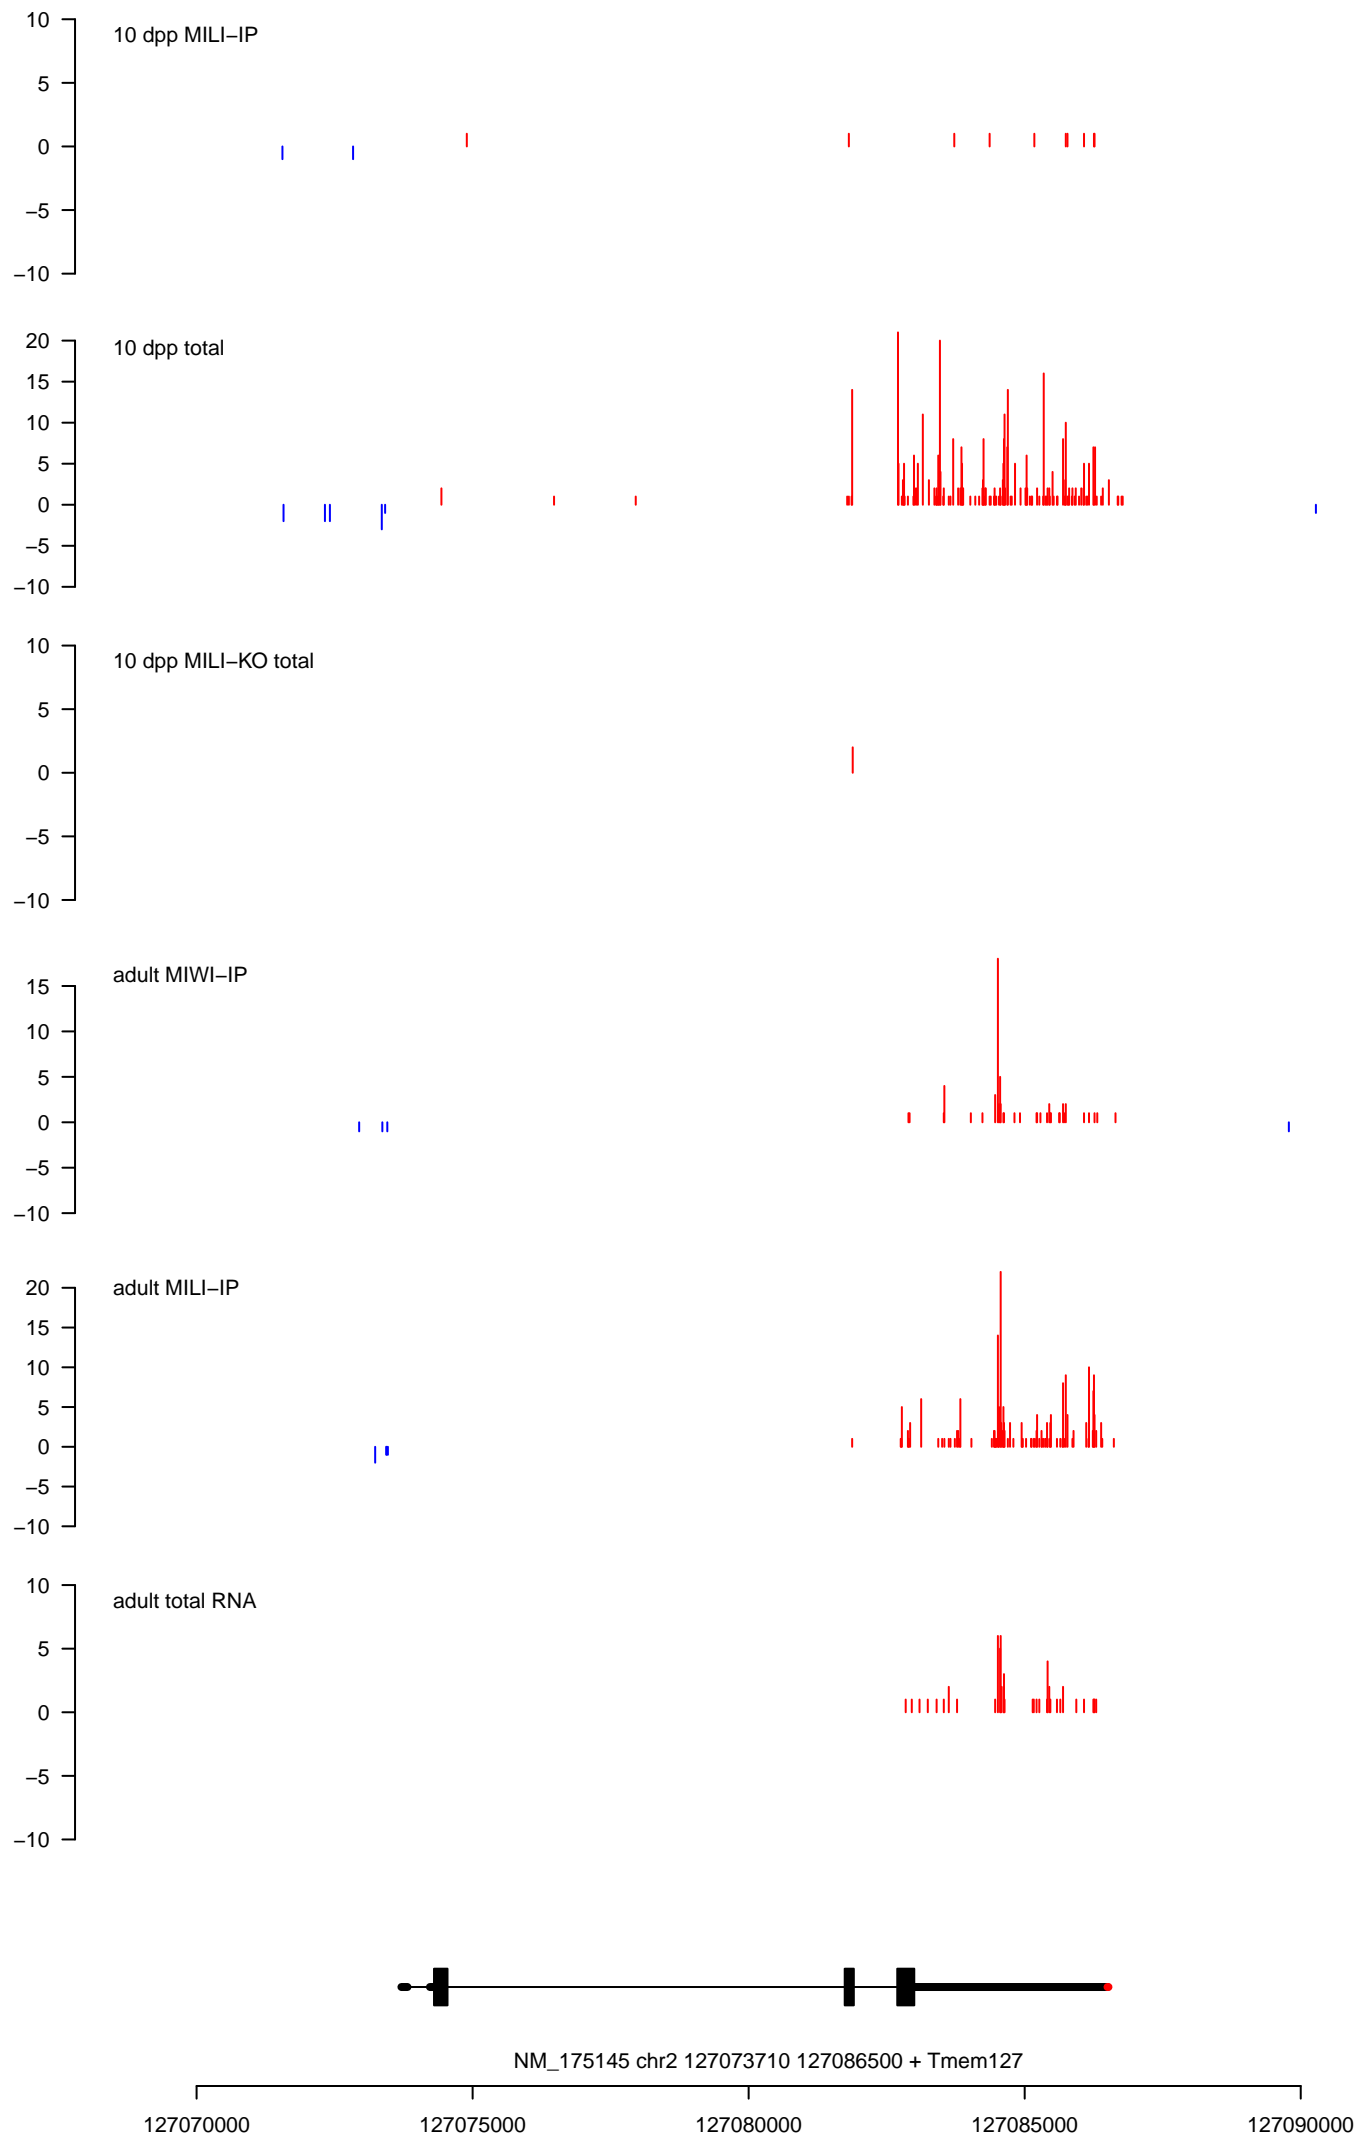

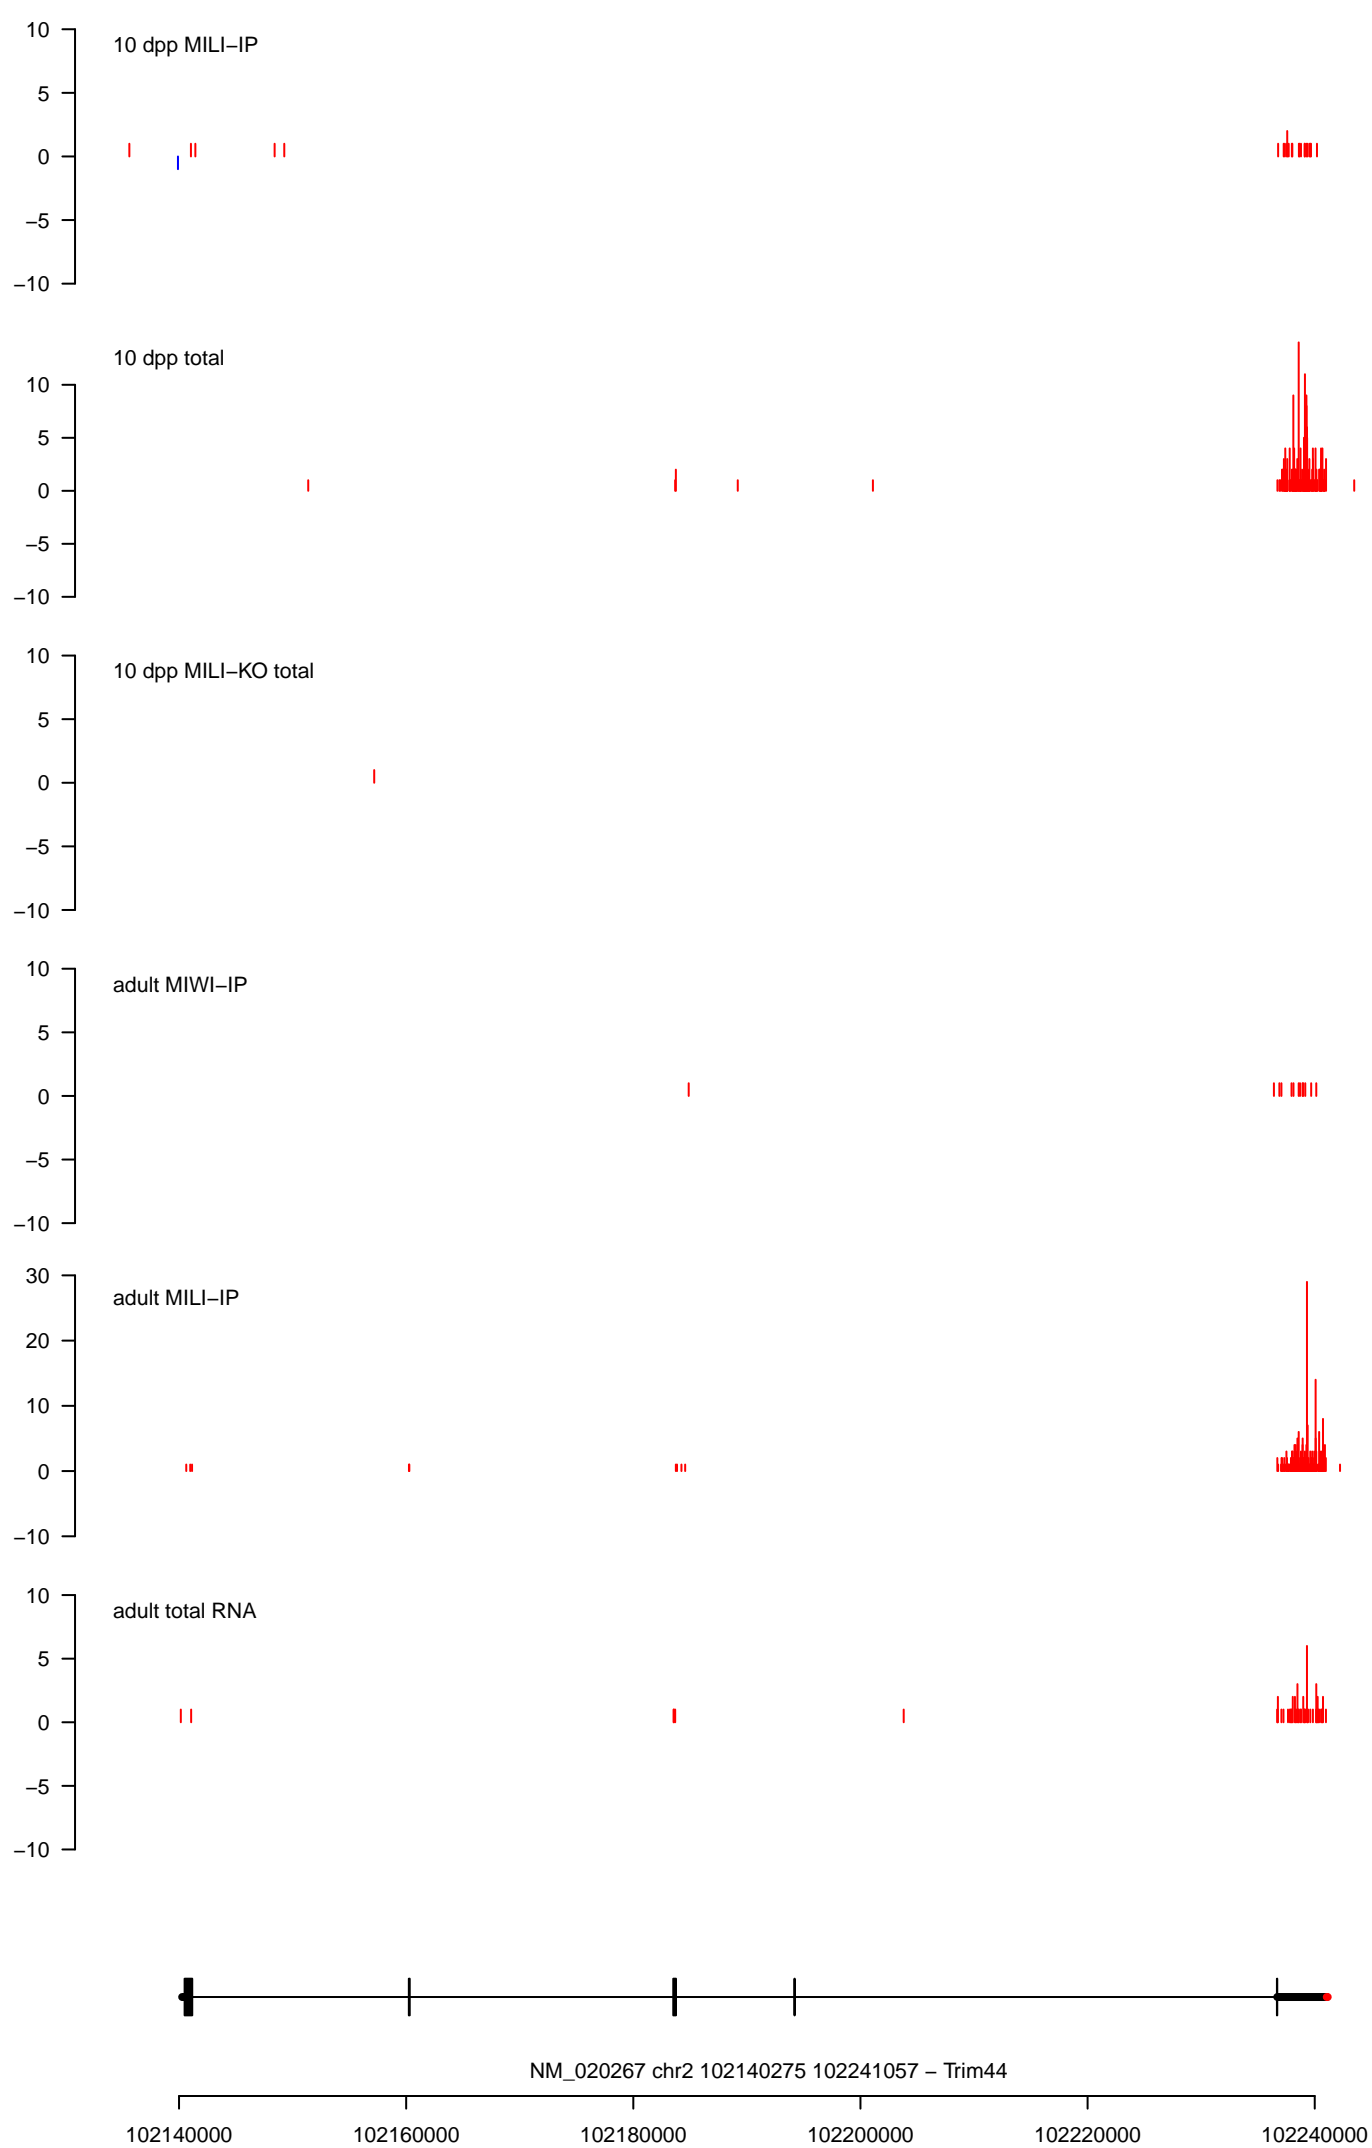

10 dpp MILI-IP

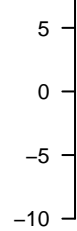

10 dpp total

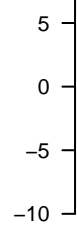

10 dpp MILI-KO total

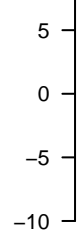

adult MIWI-IP

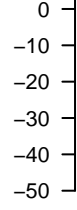

adult MILI-IP

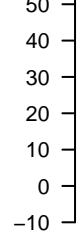

adult total RNA

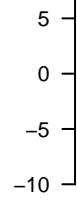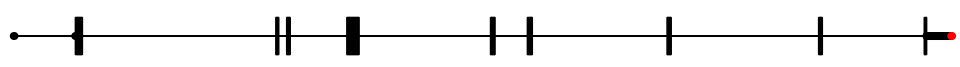

NM\_024239 chr6 83493199 83522430 - Stambp

83490000

83500000

83510000

83520000

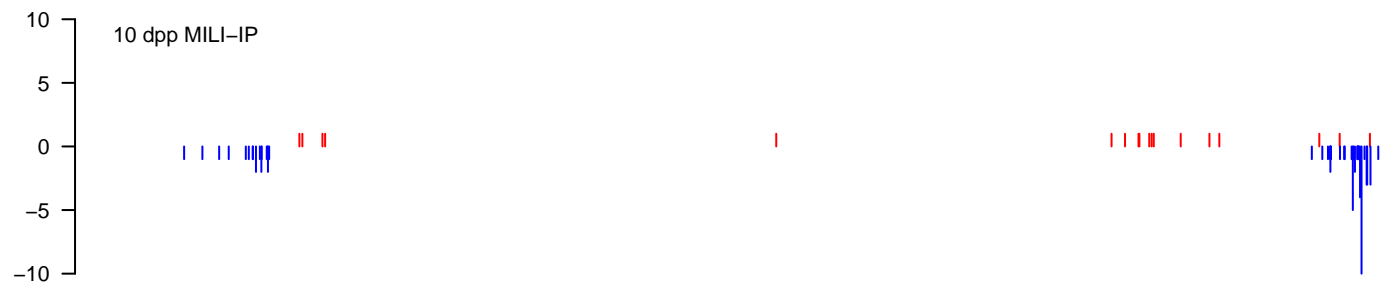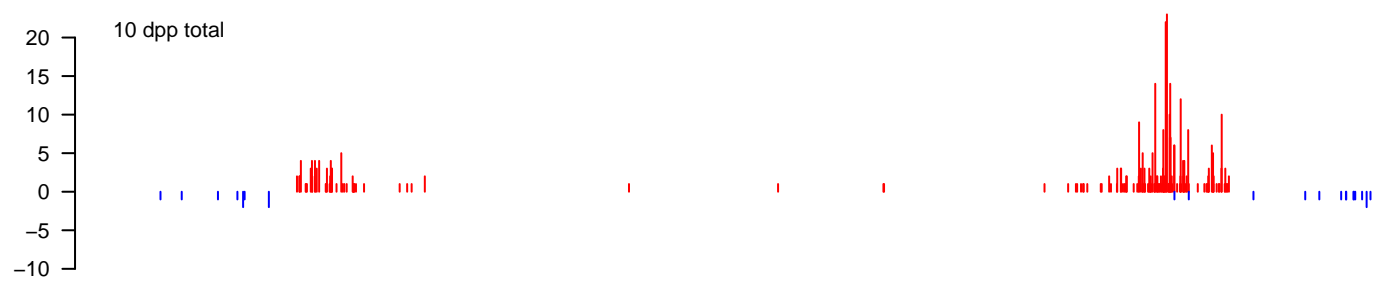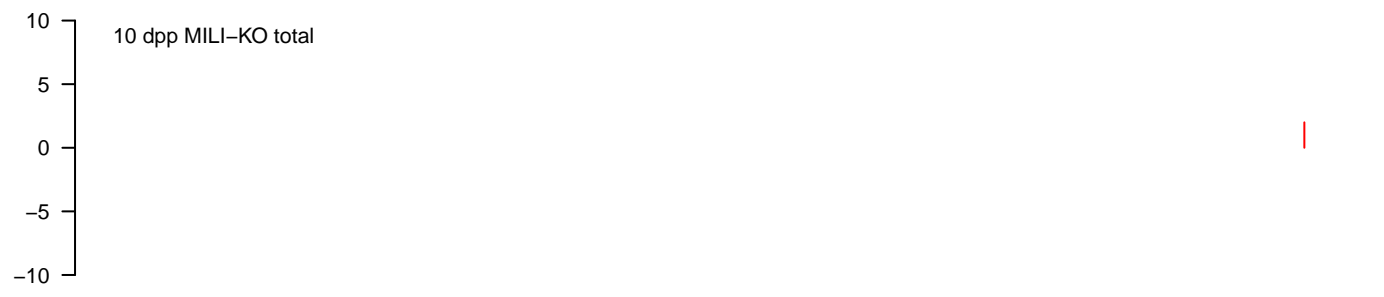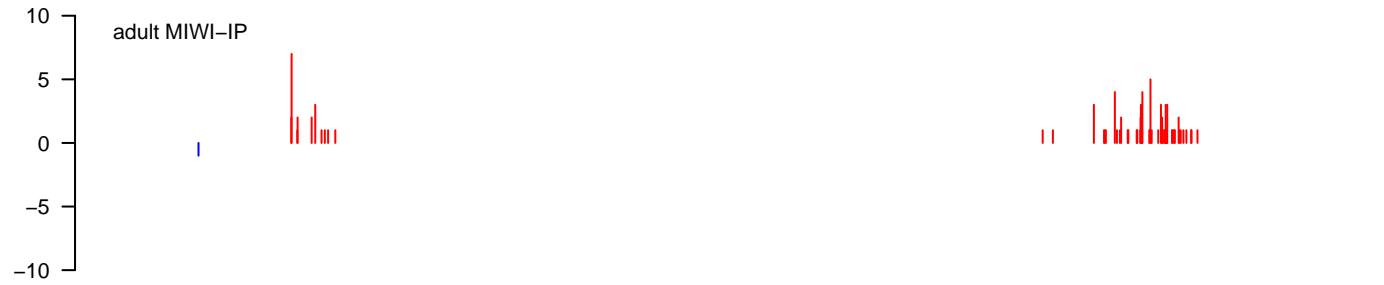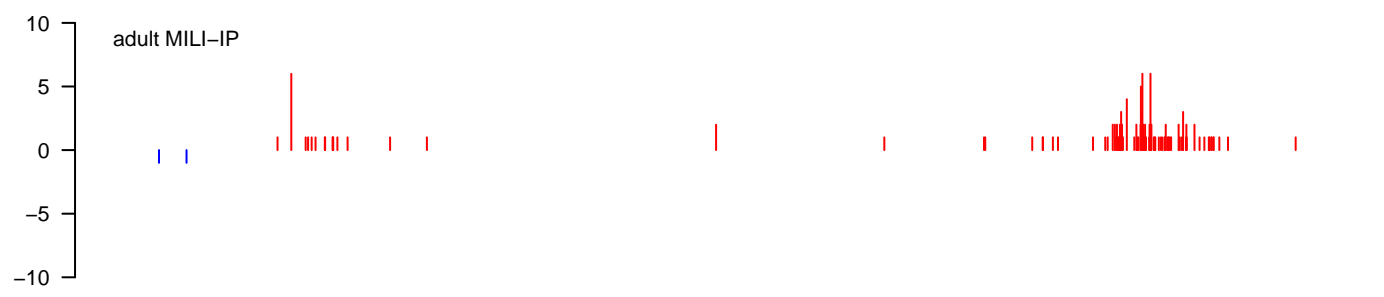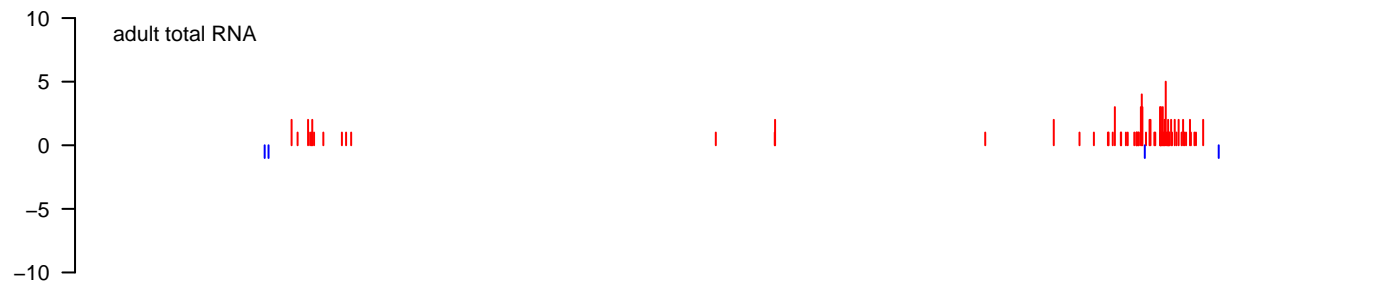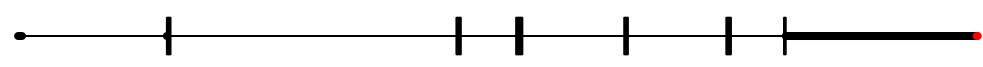

NM\_007896 chr2 153567022 153599050 + Mapre1

153570000 153580000 153590000 153600000

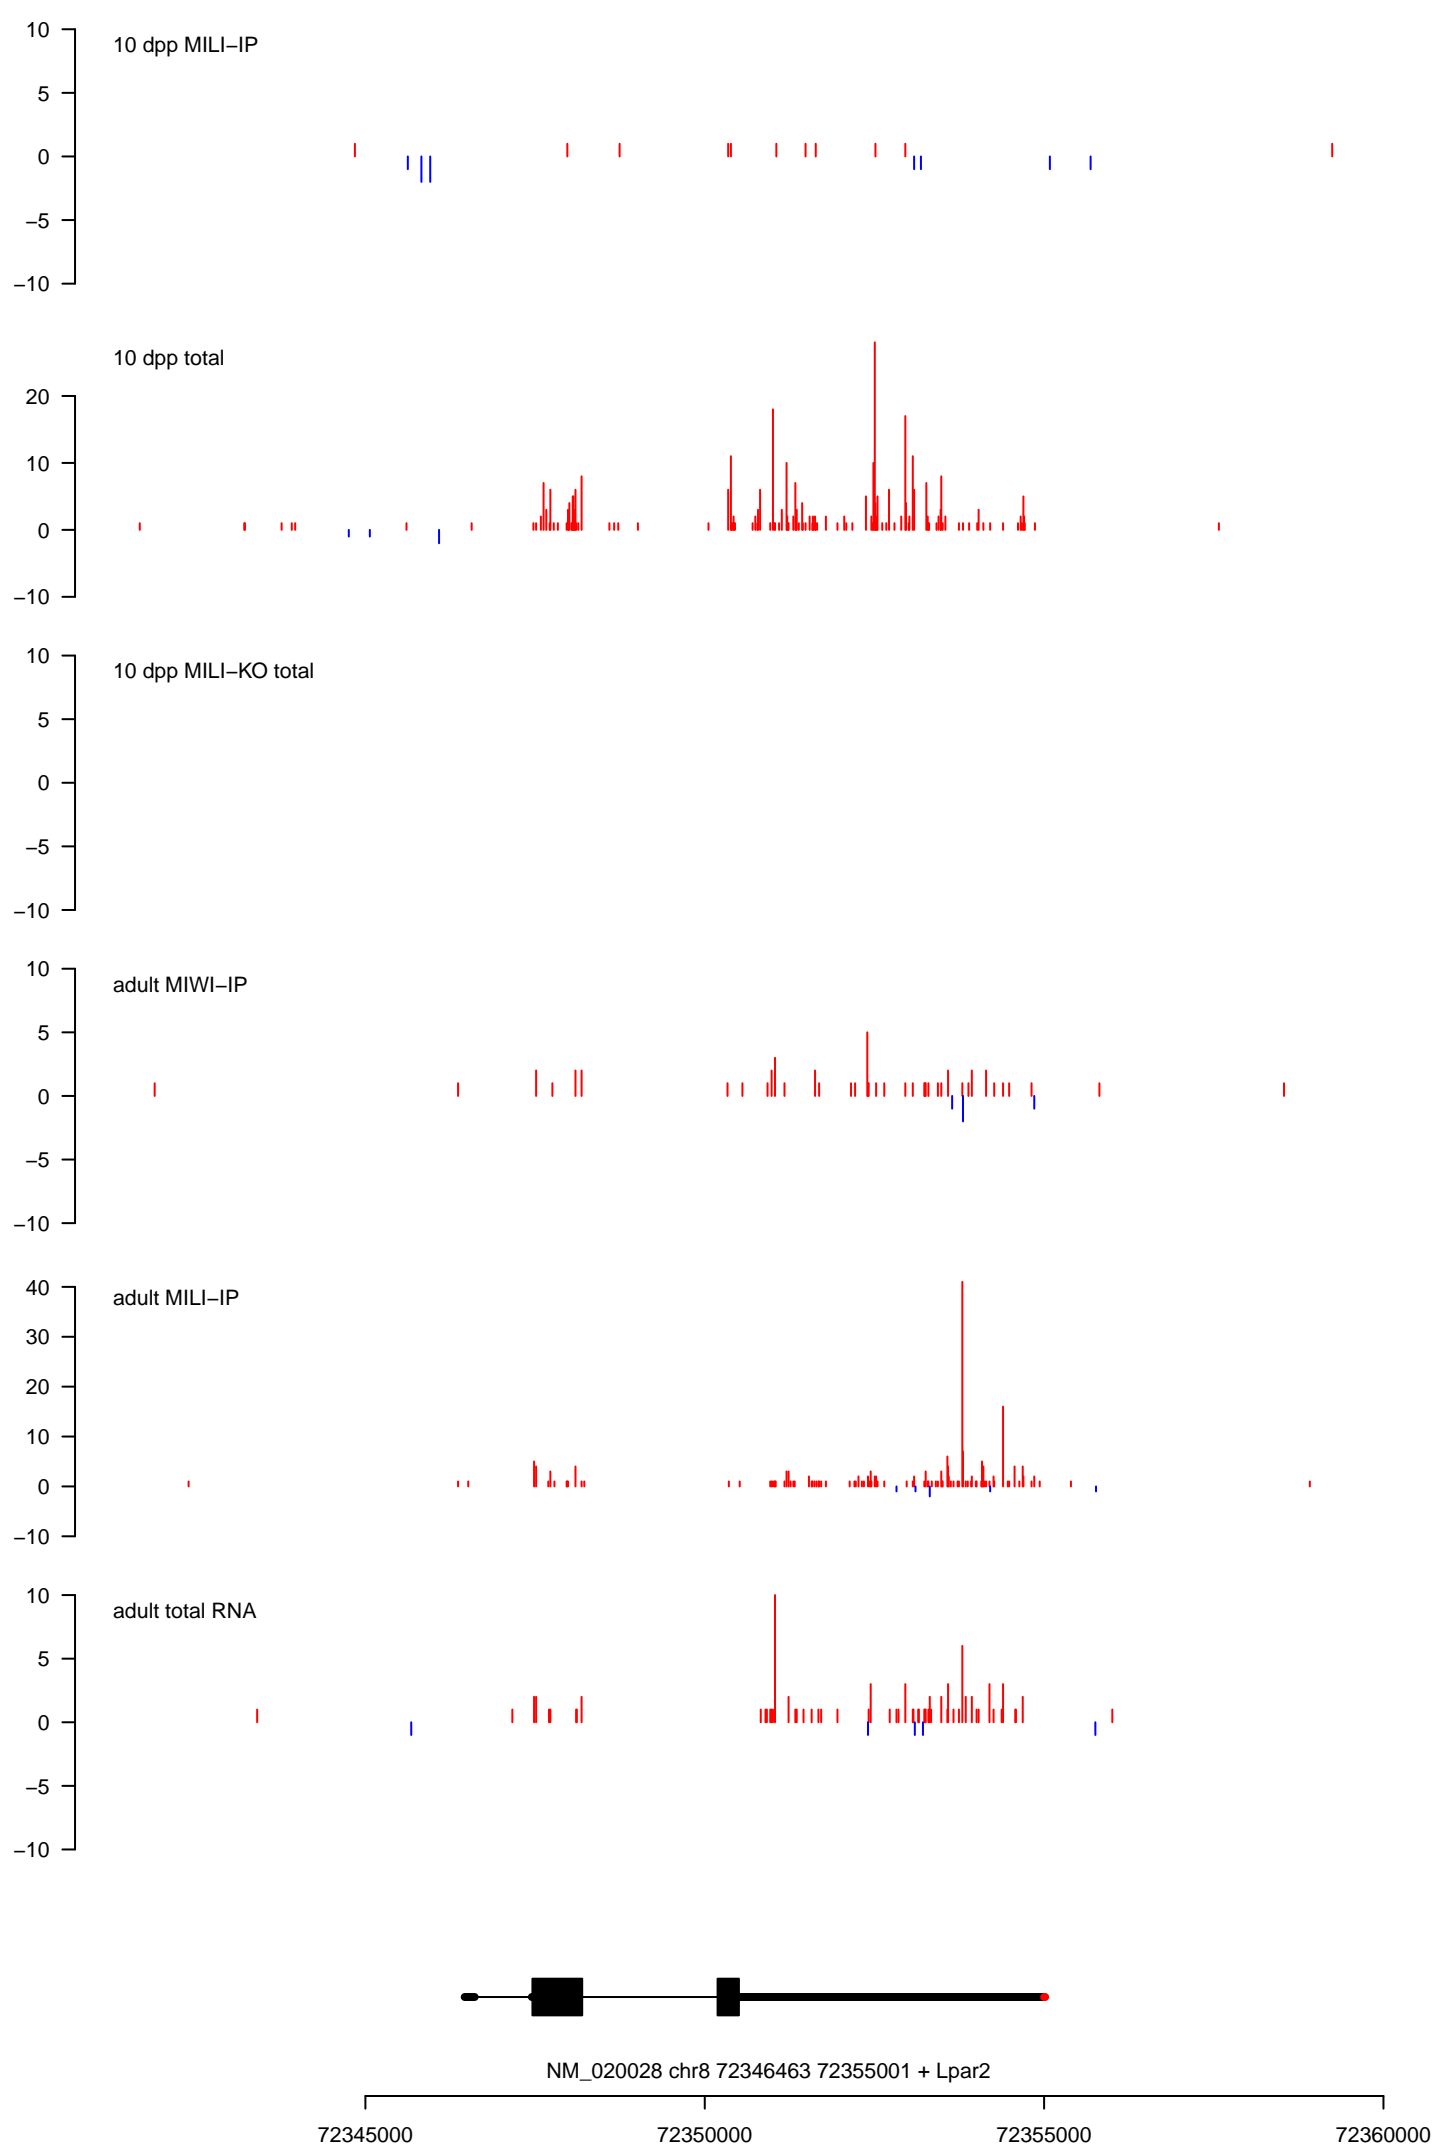

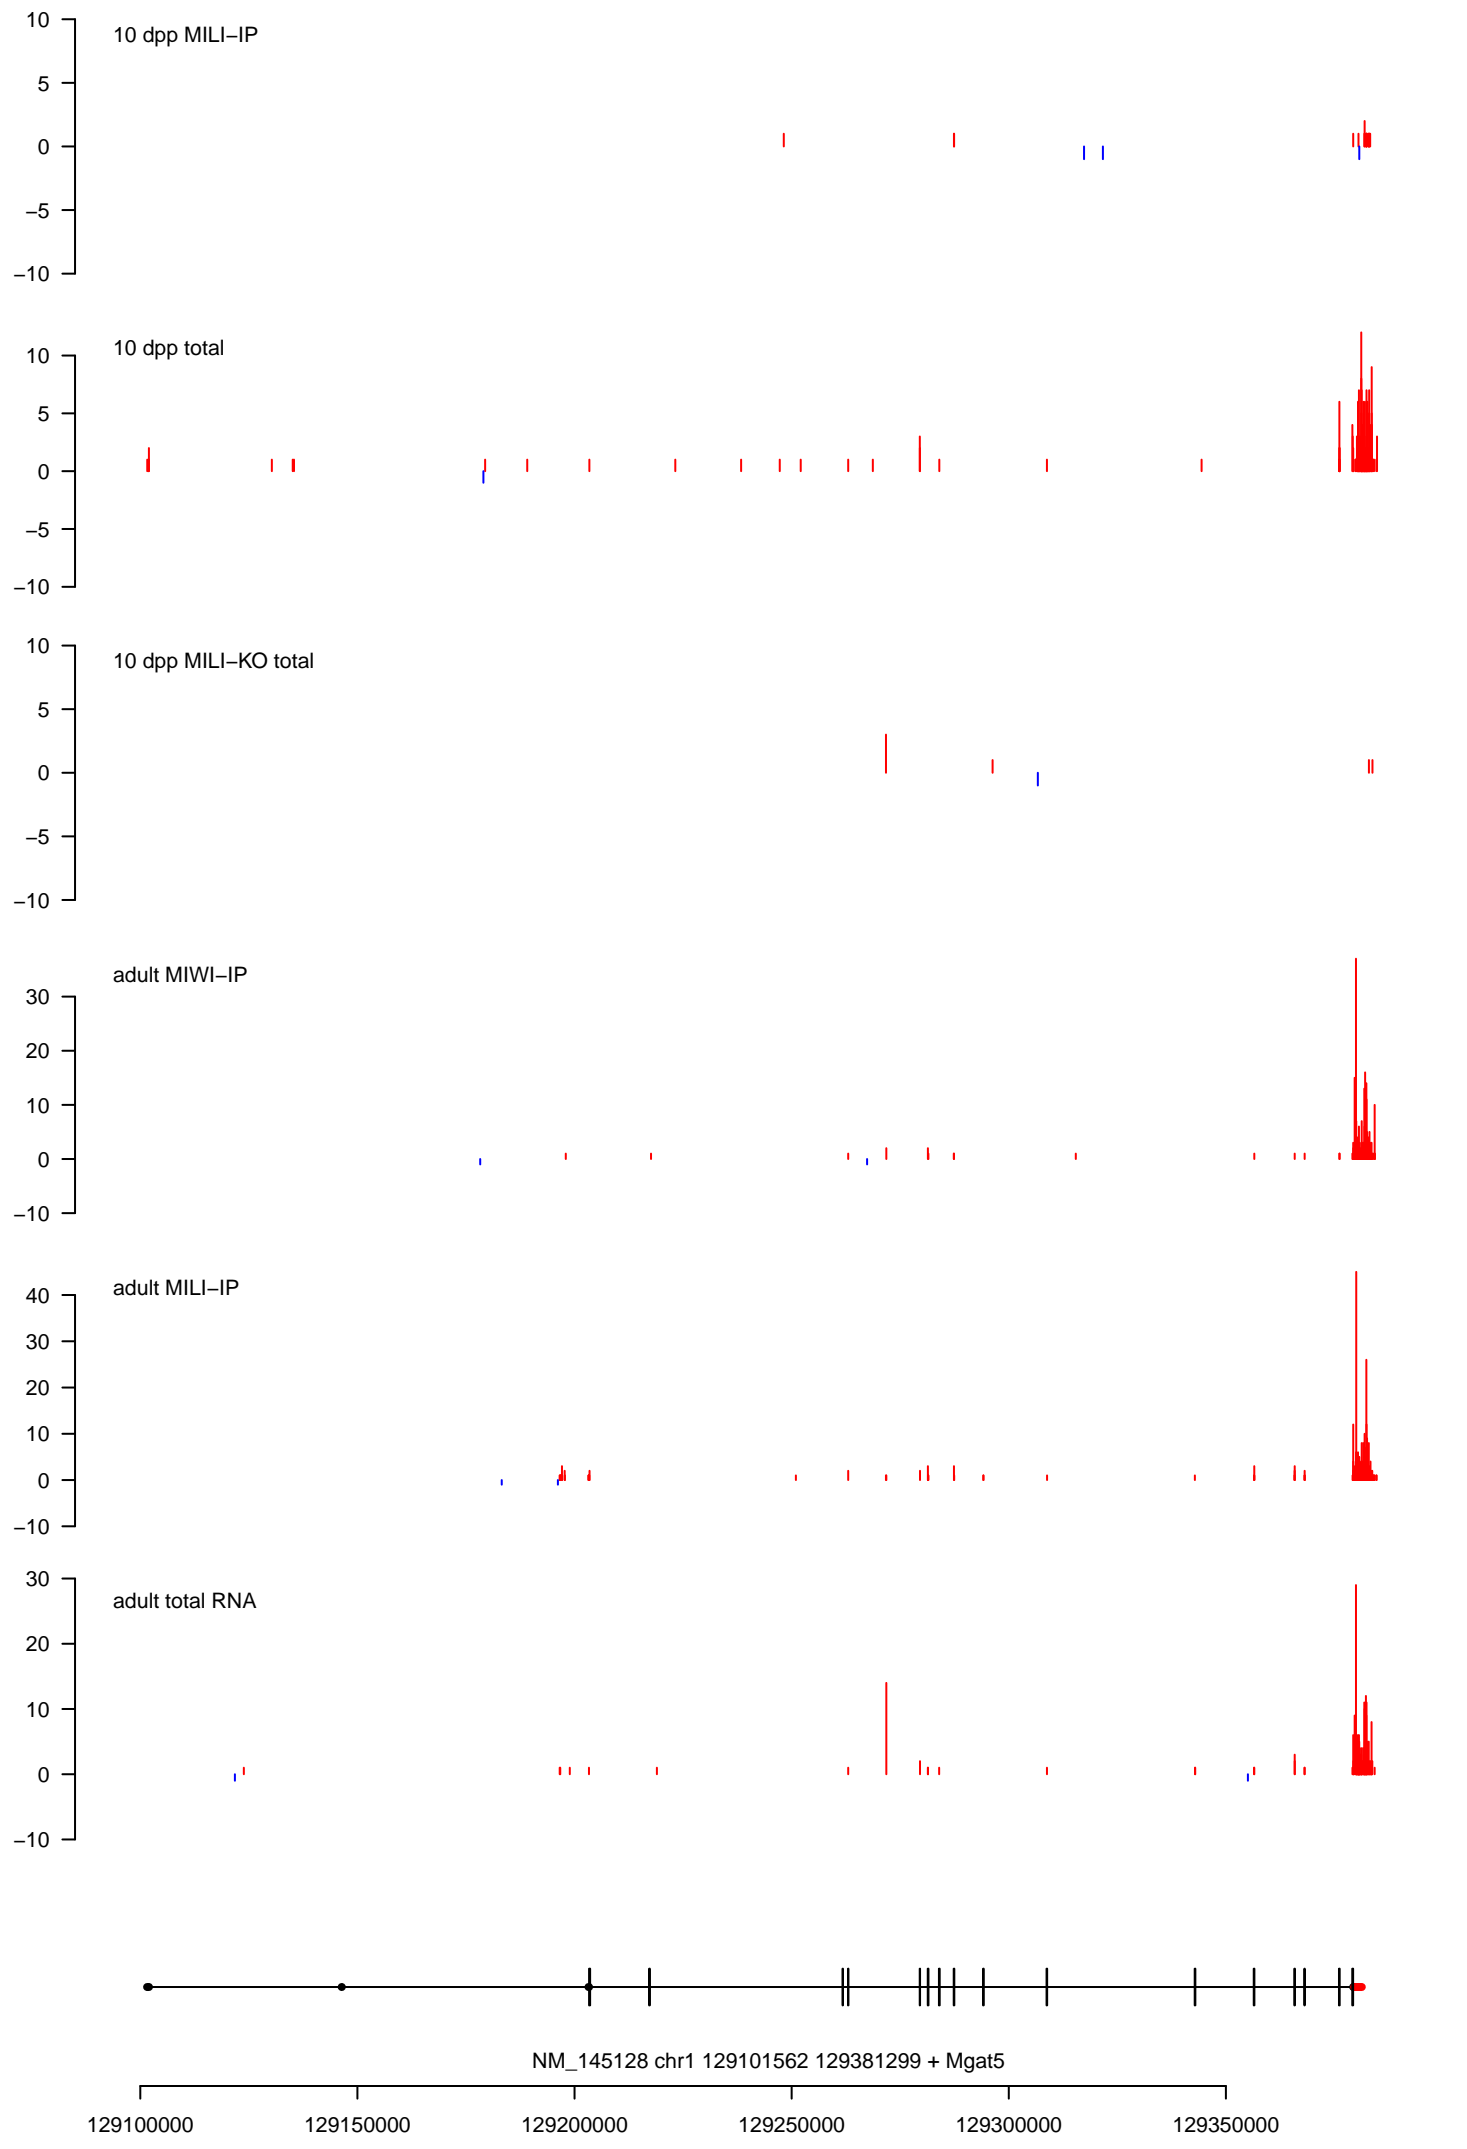

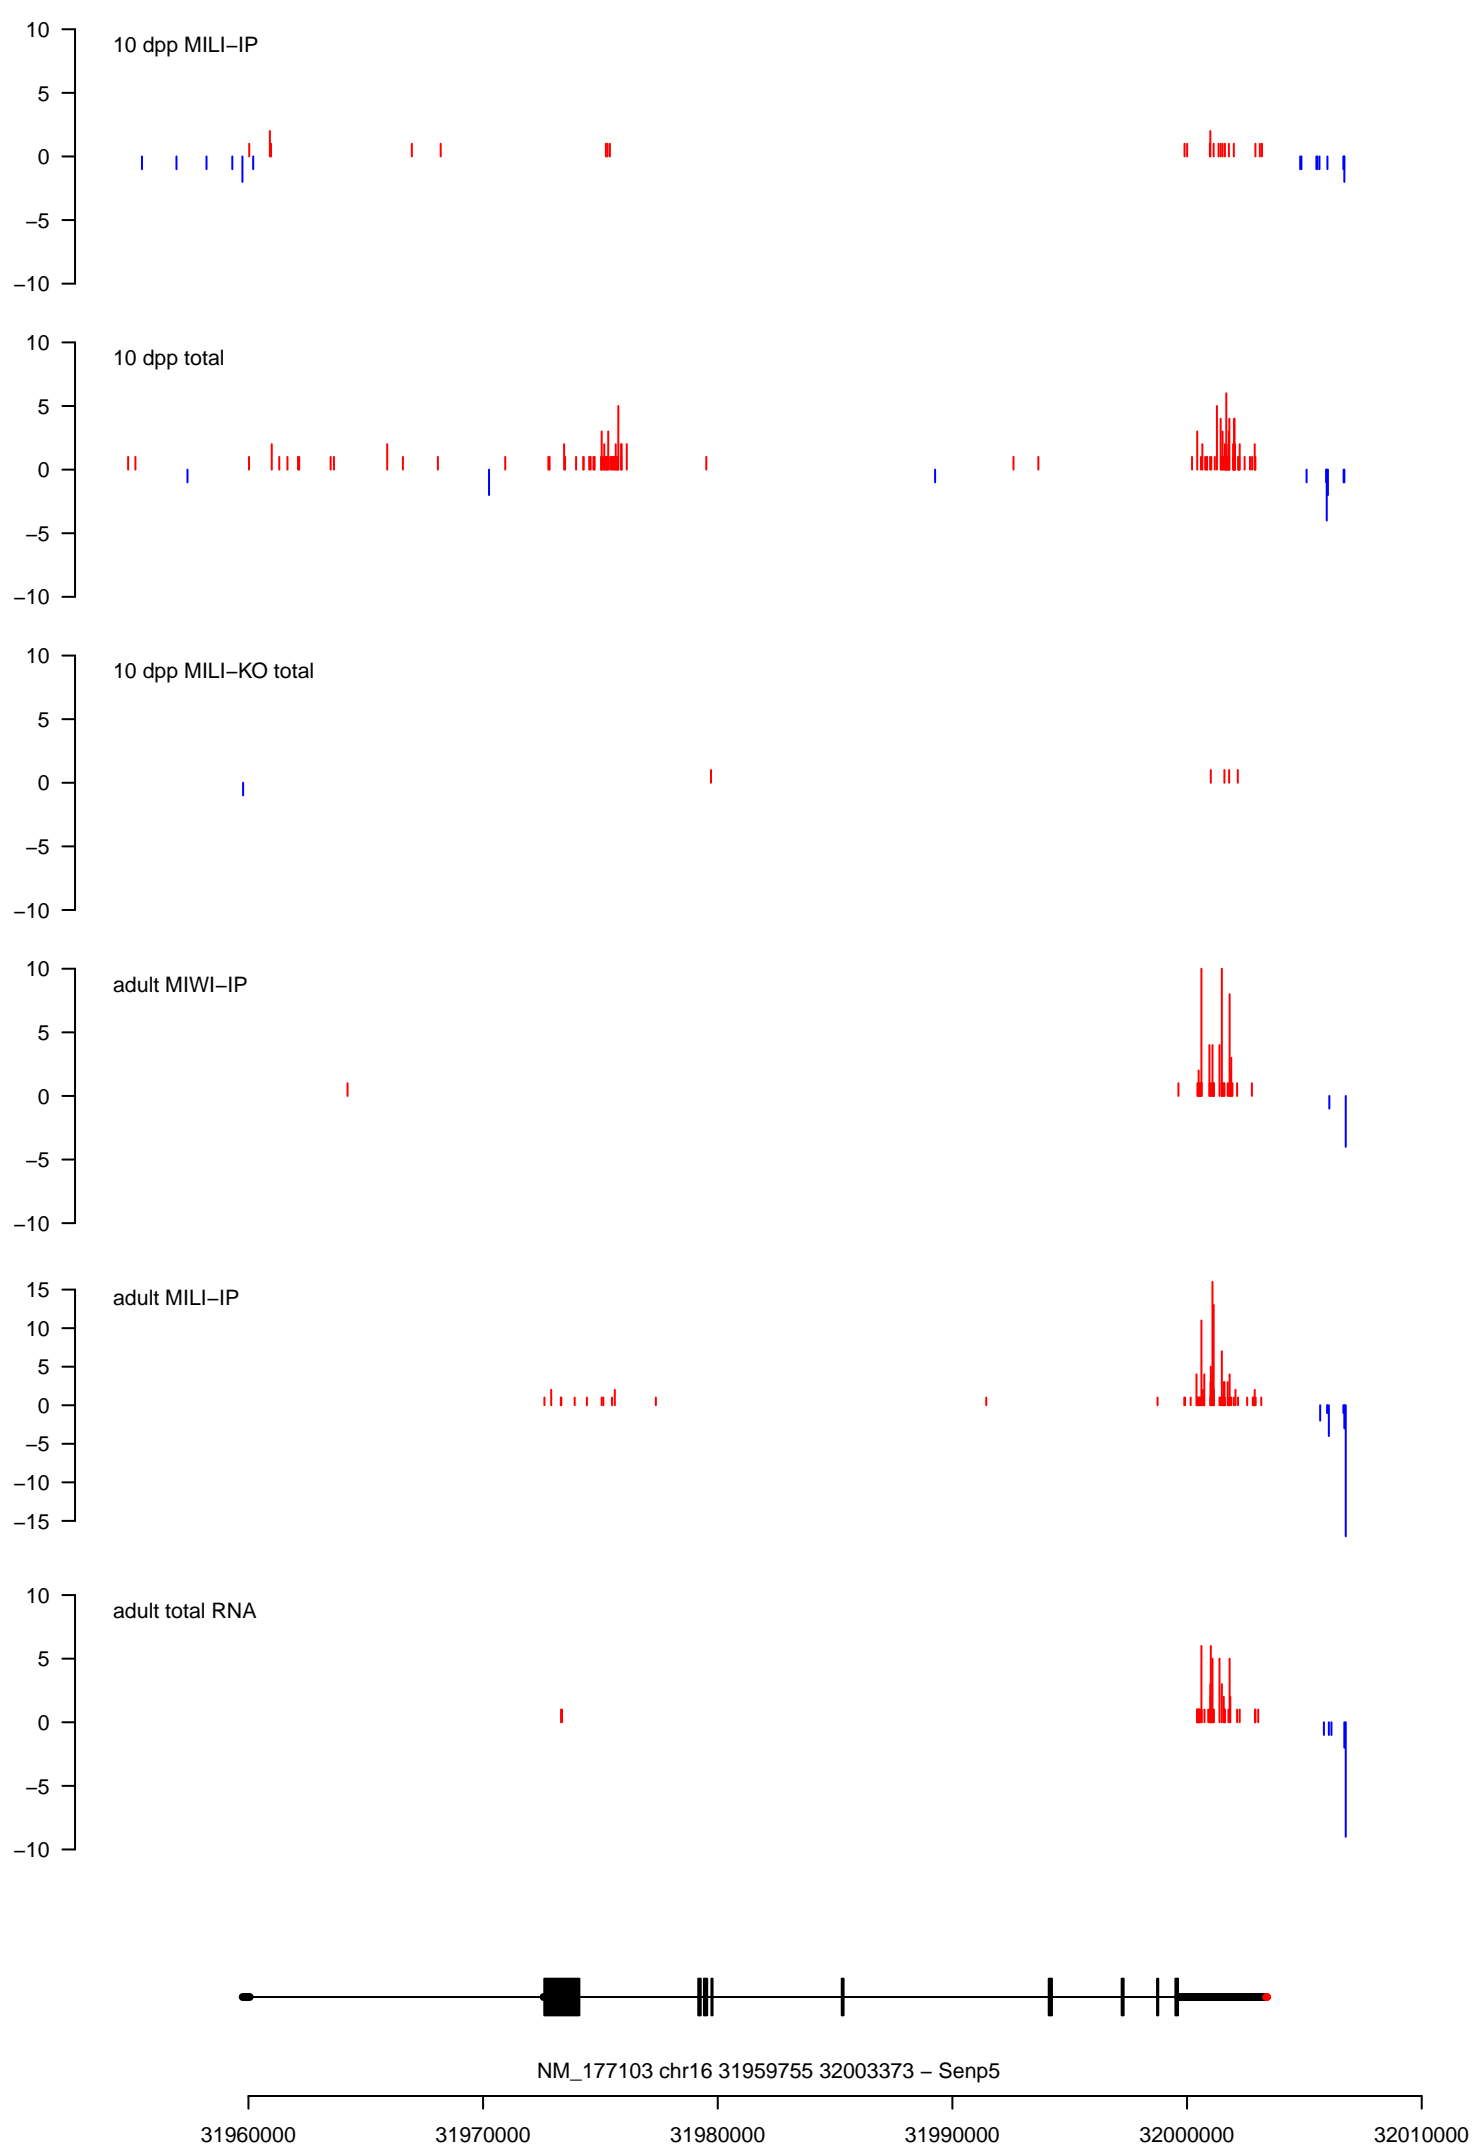

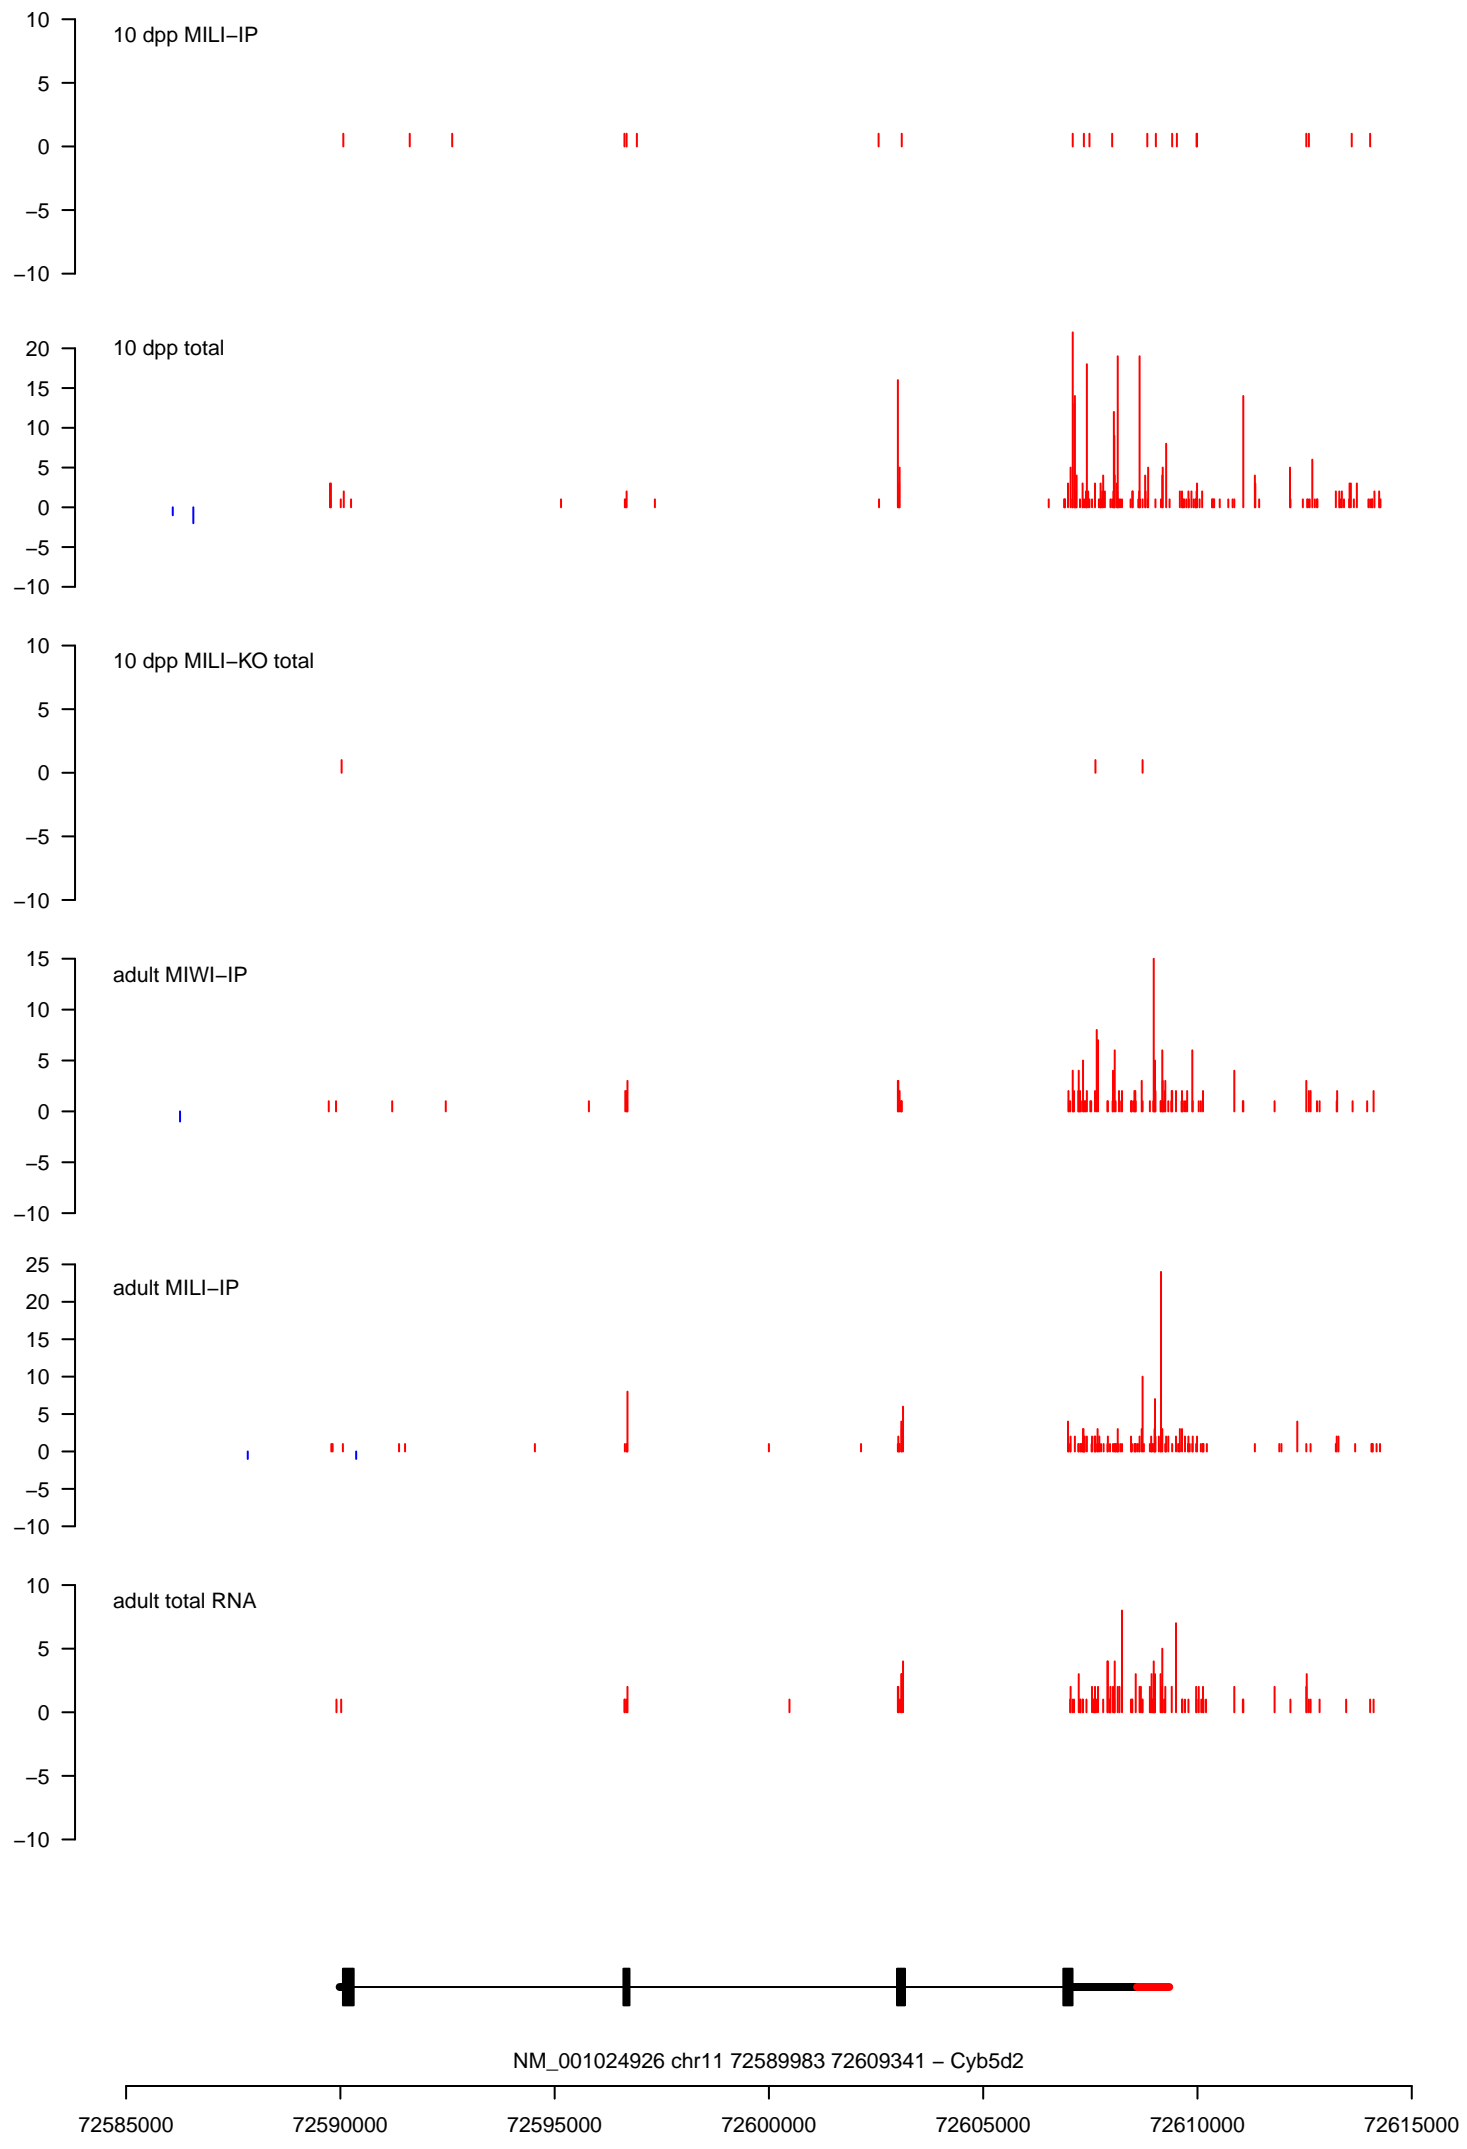



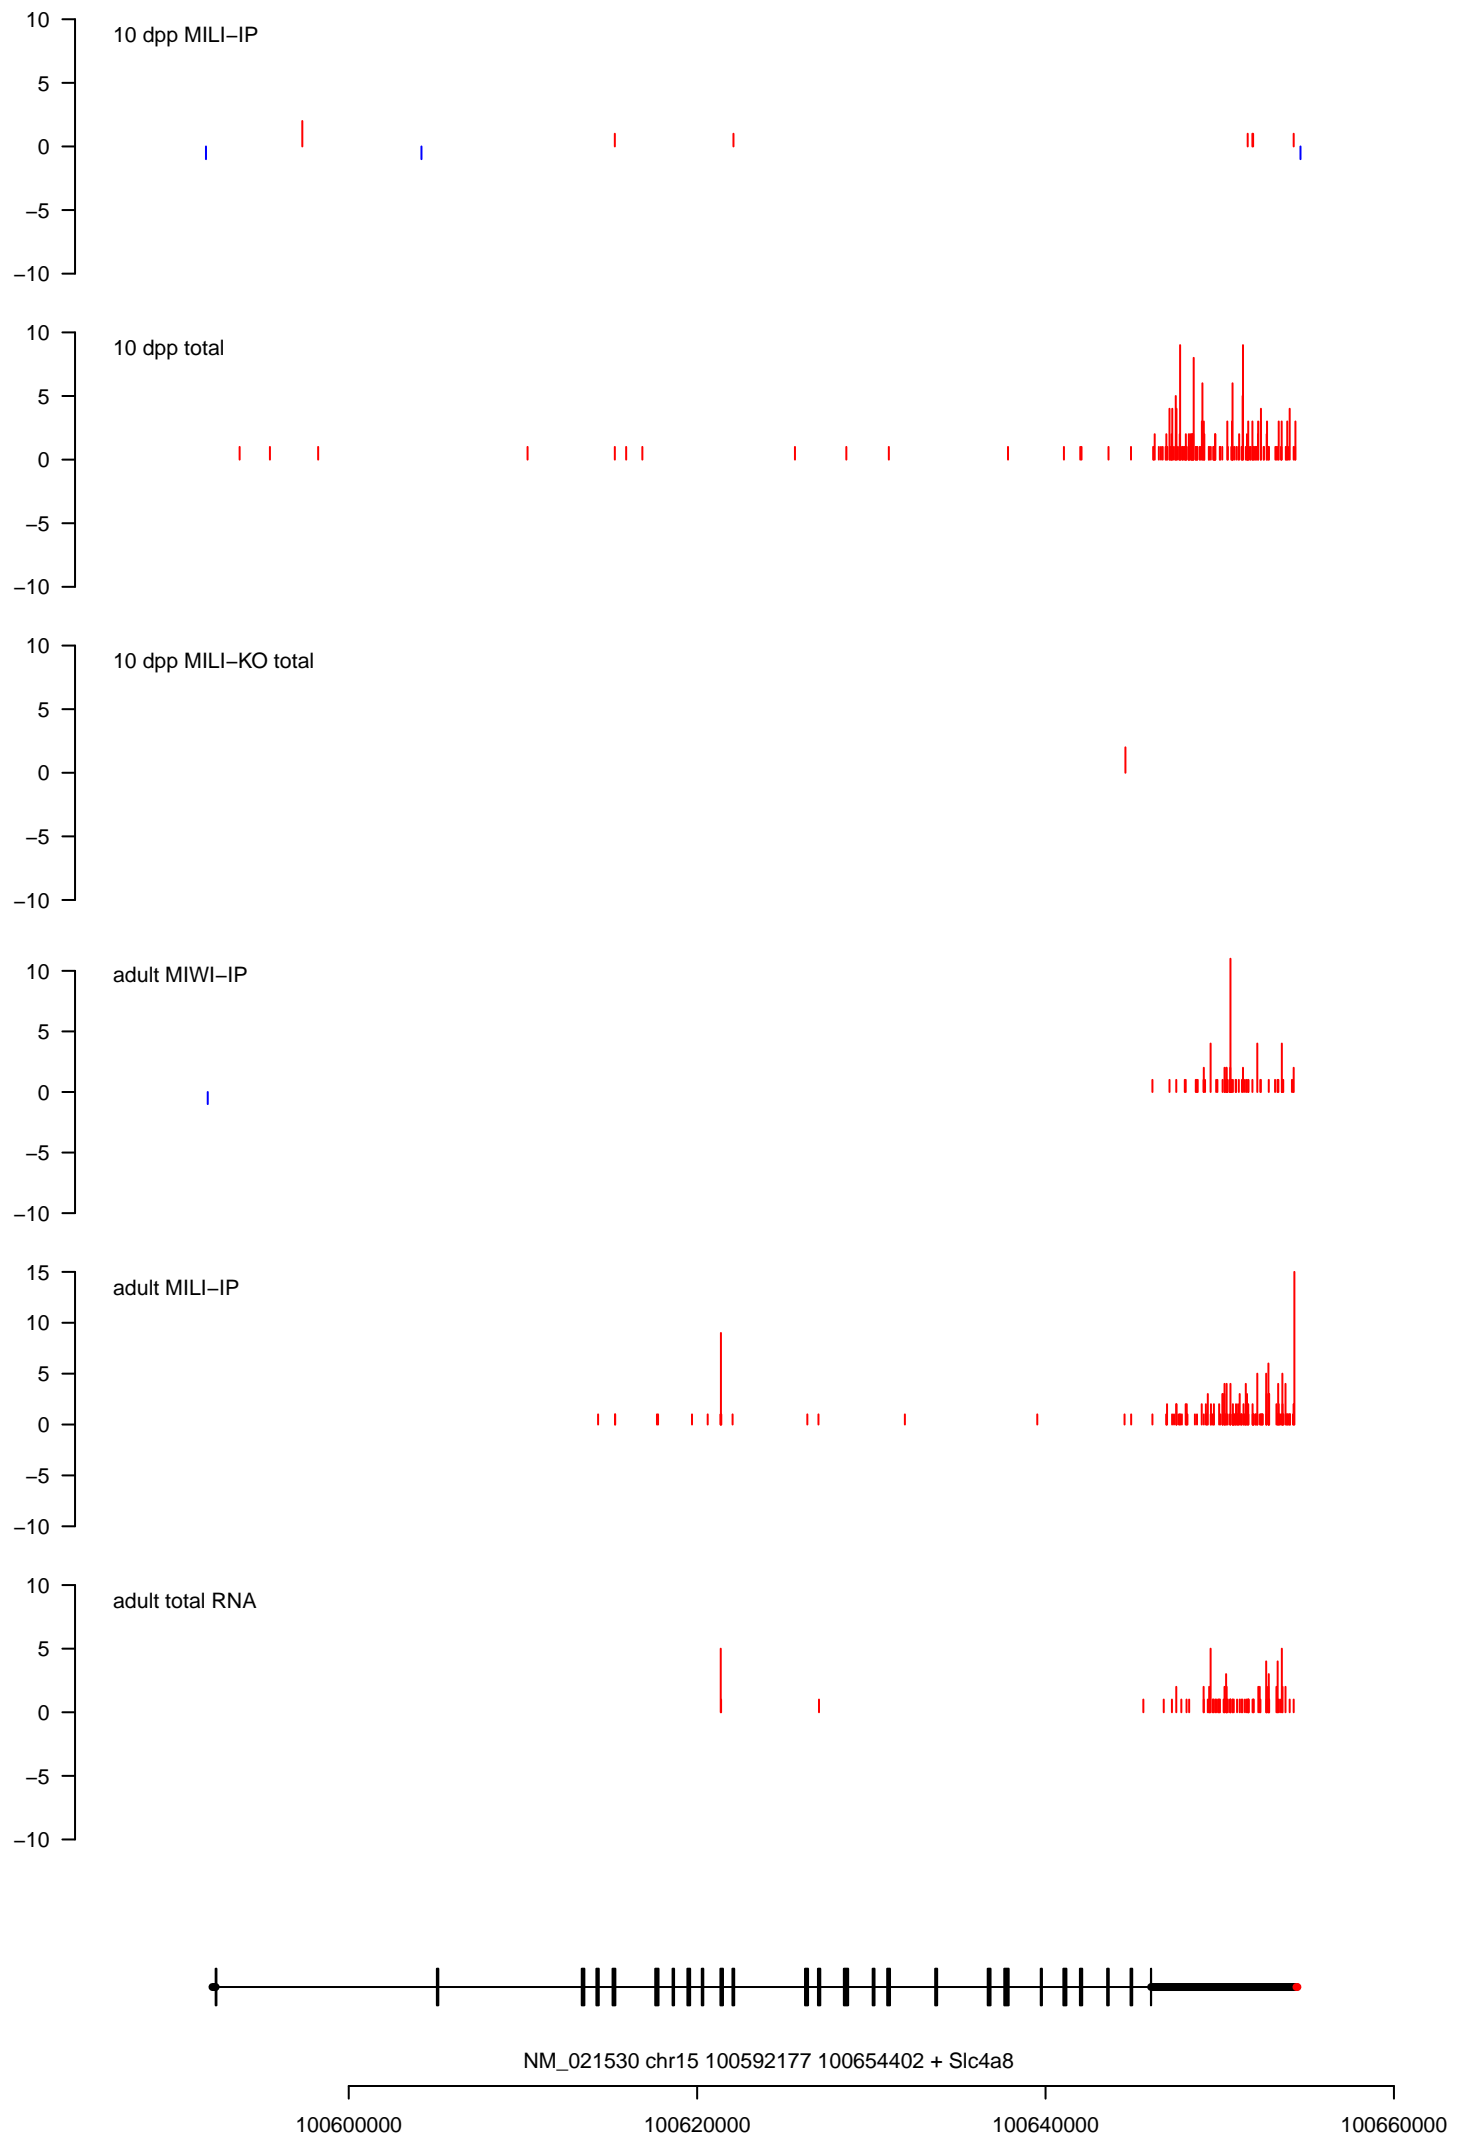



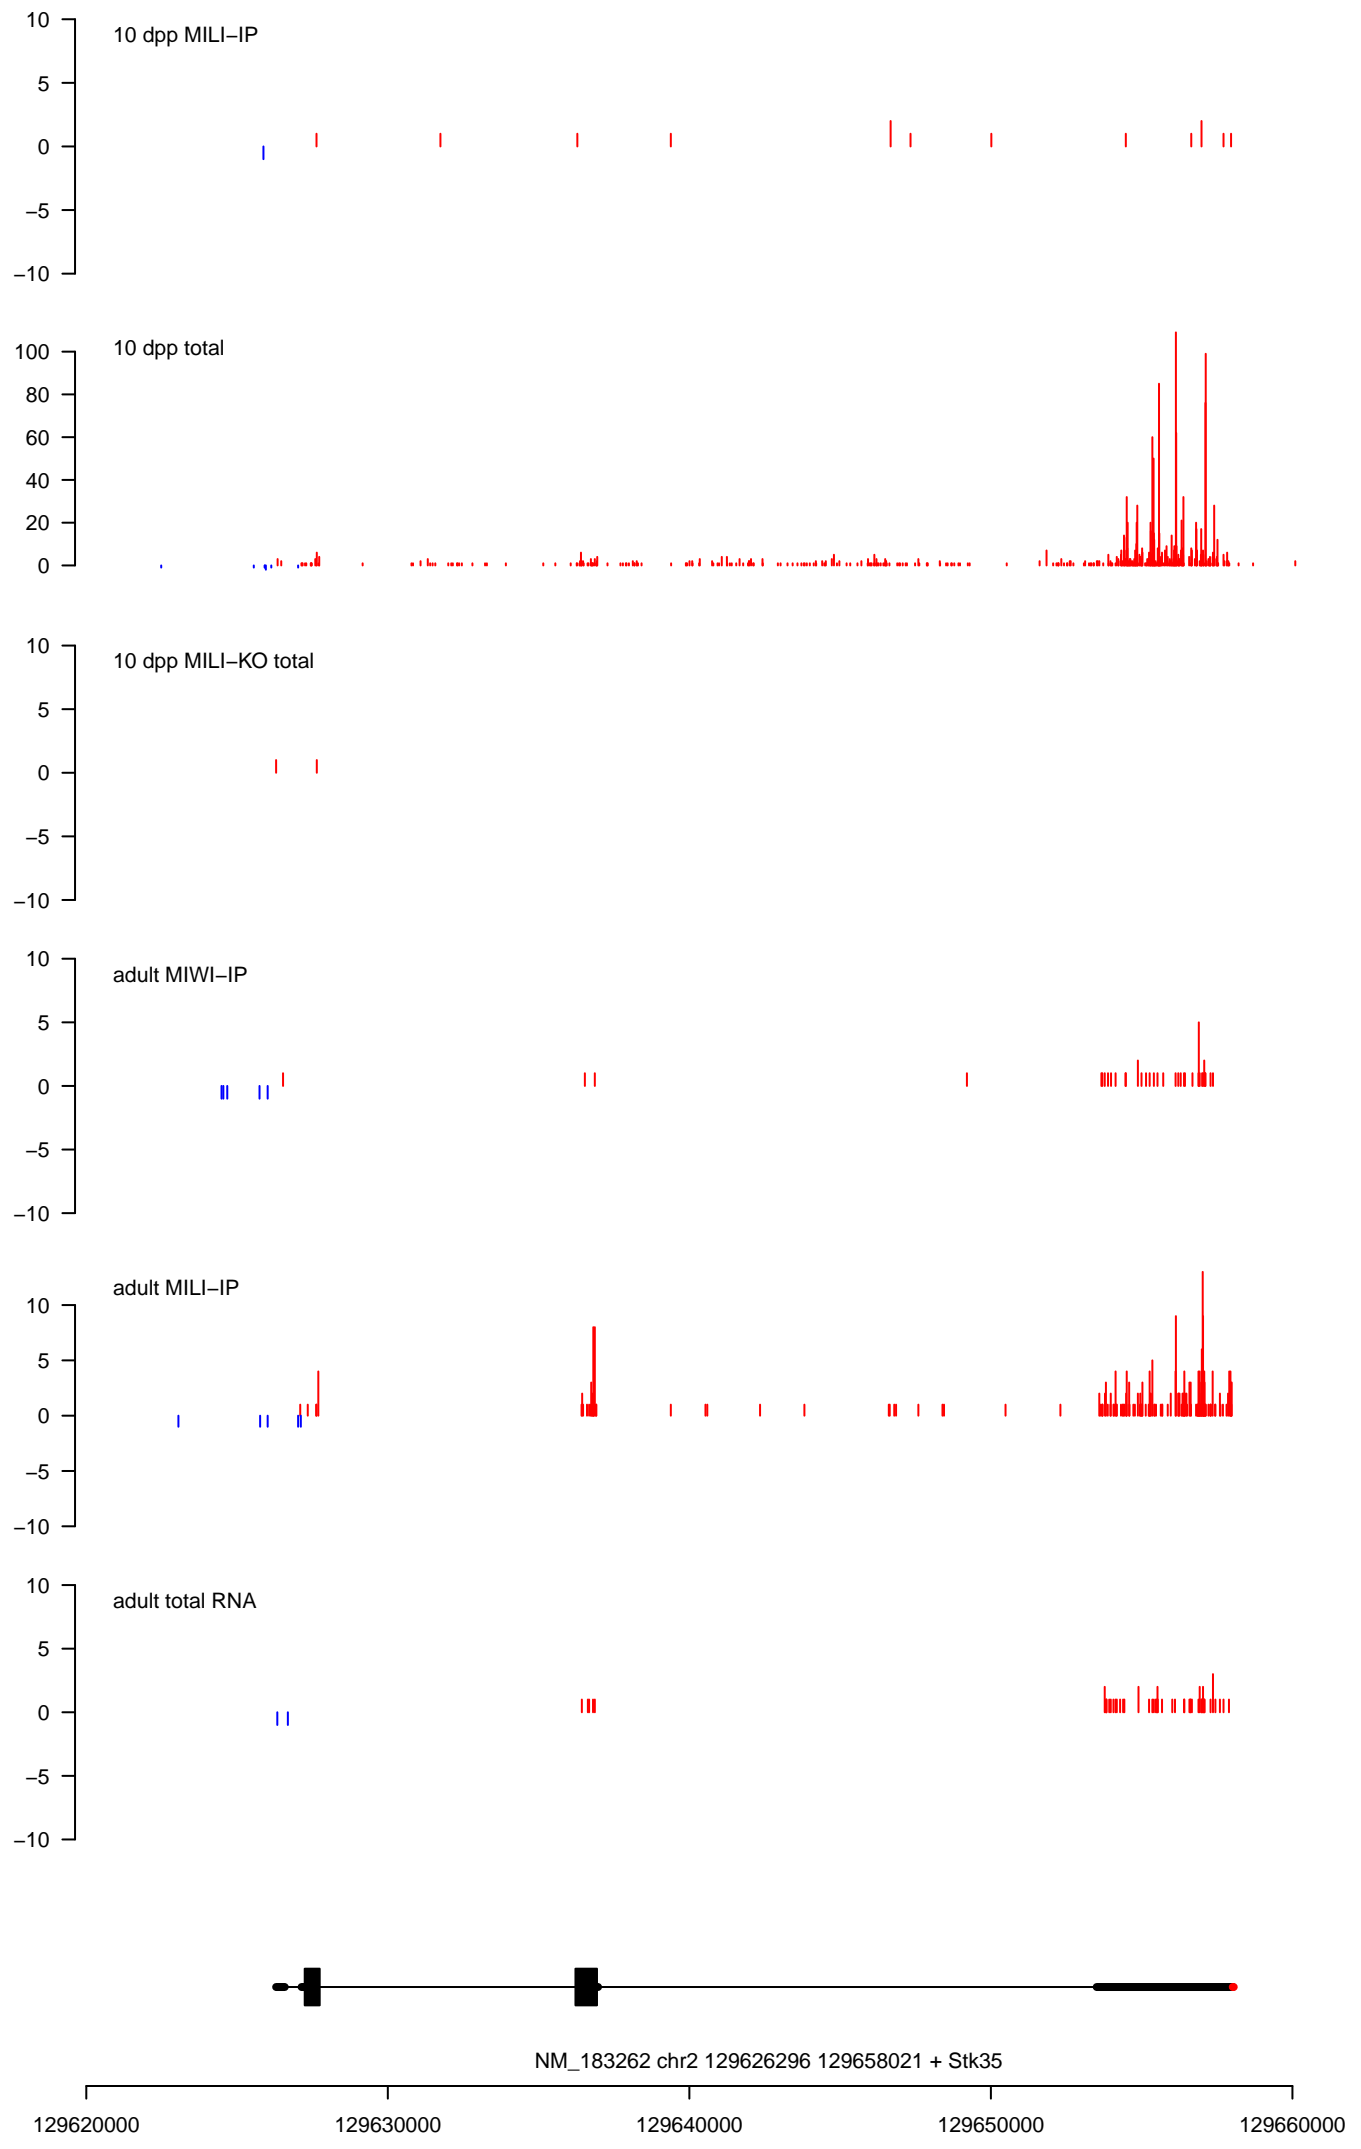

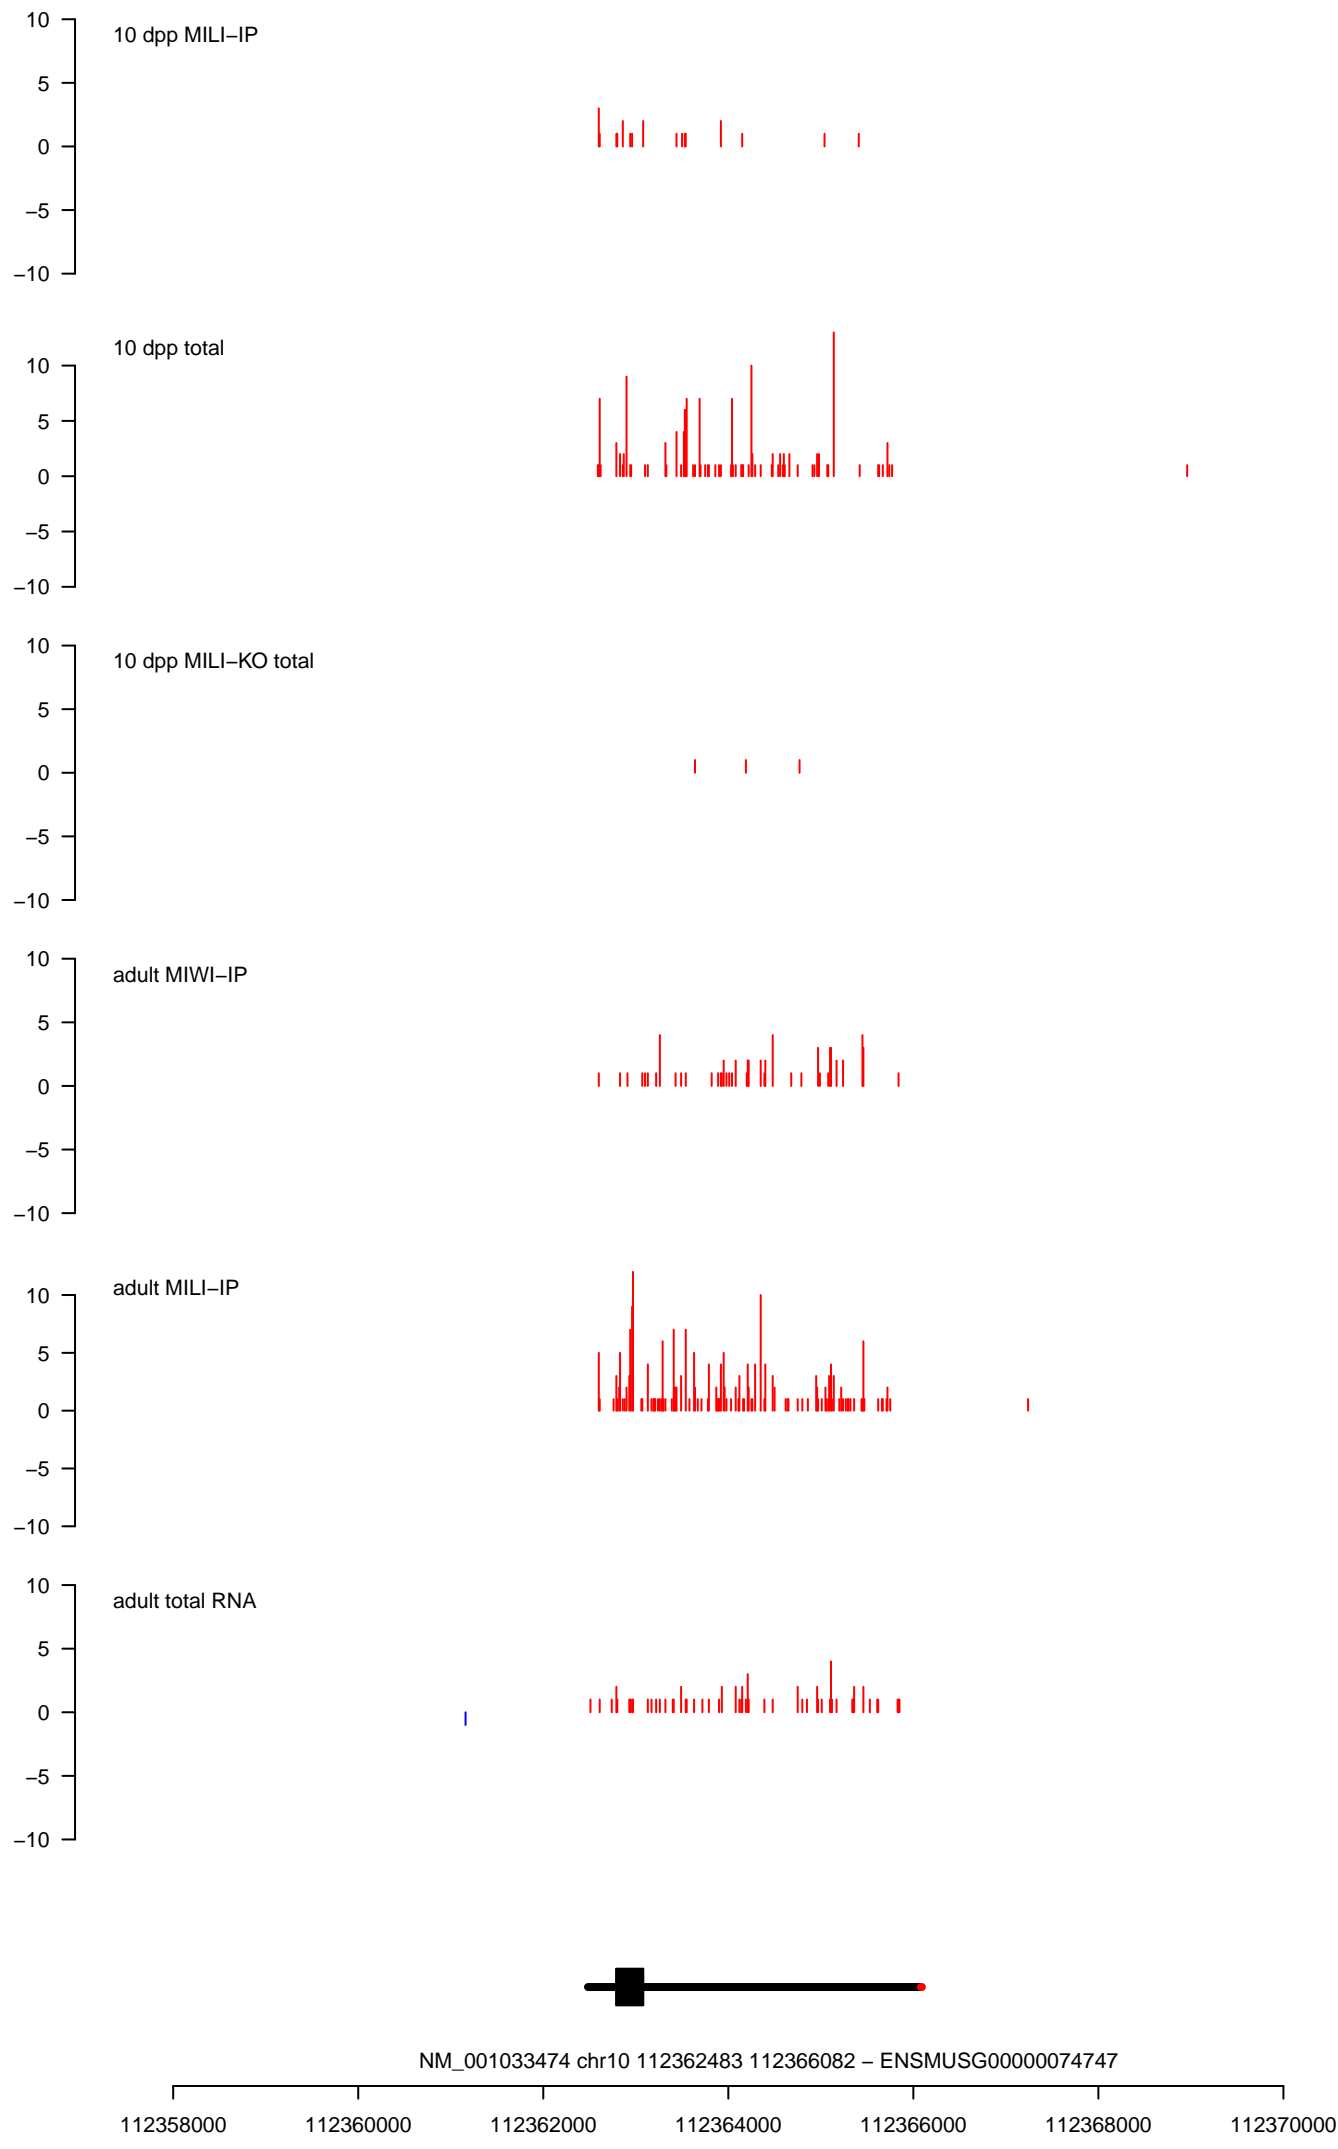

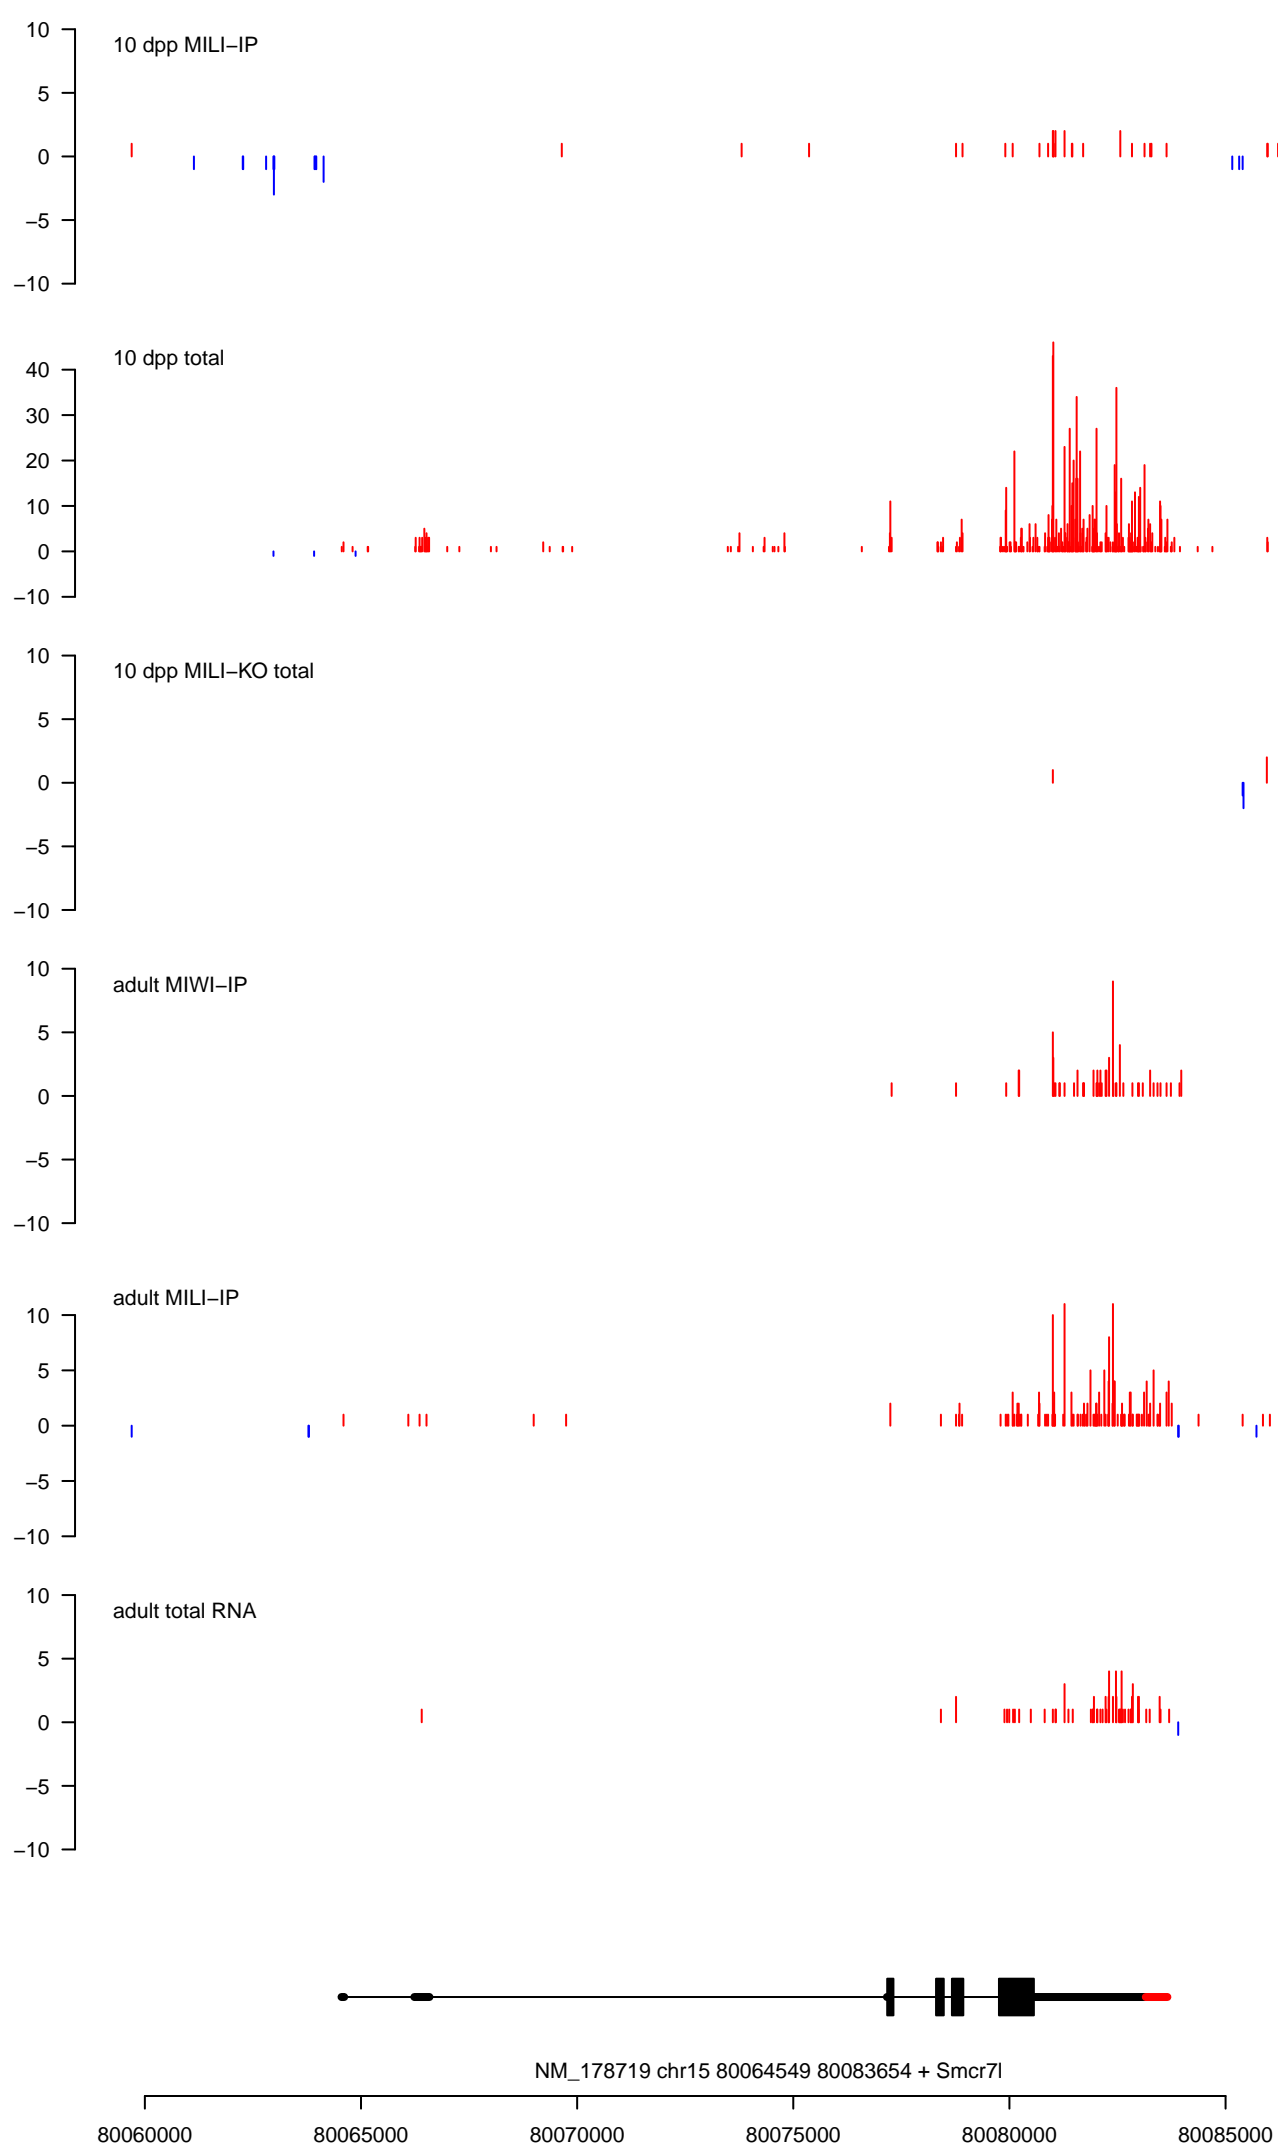

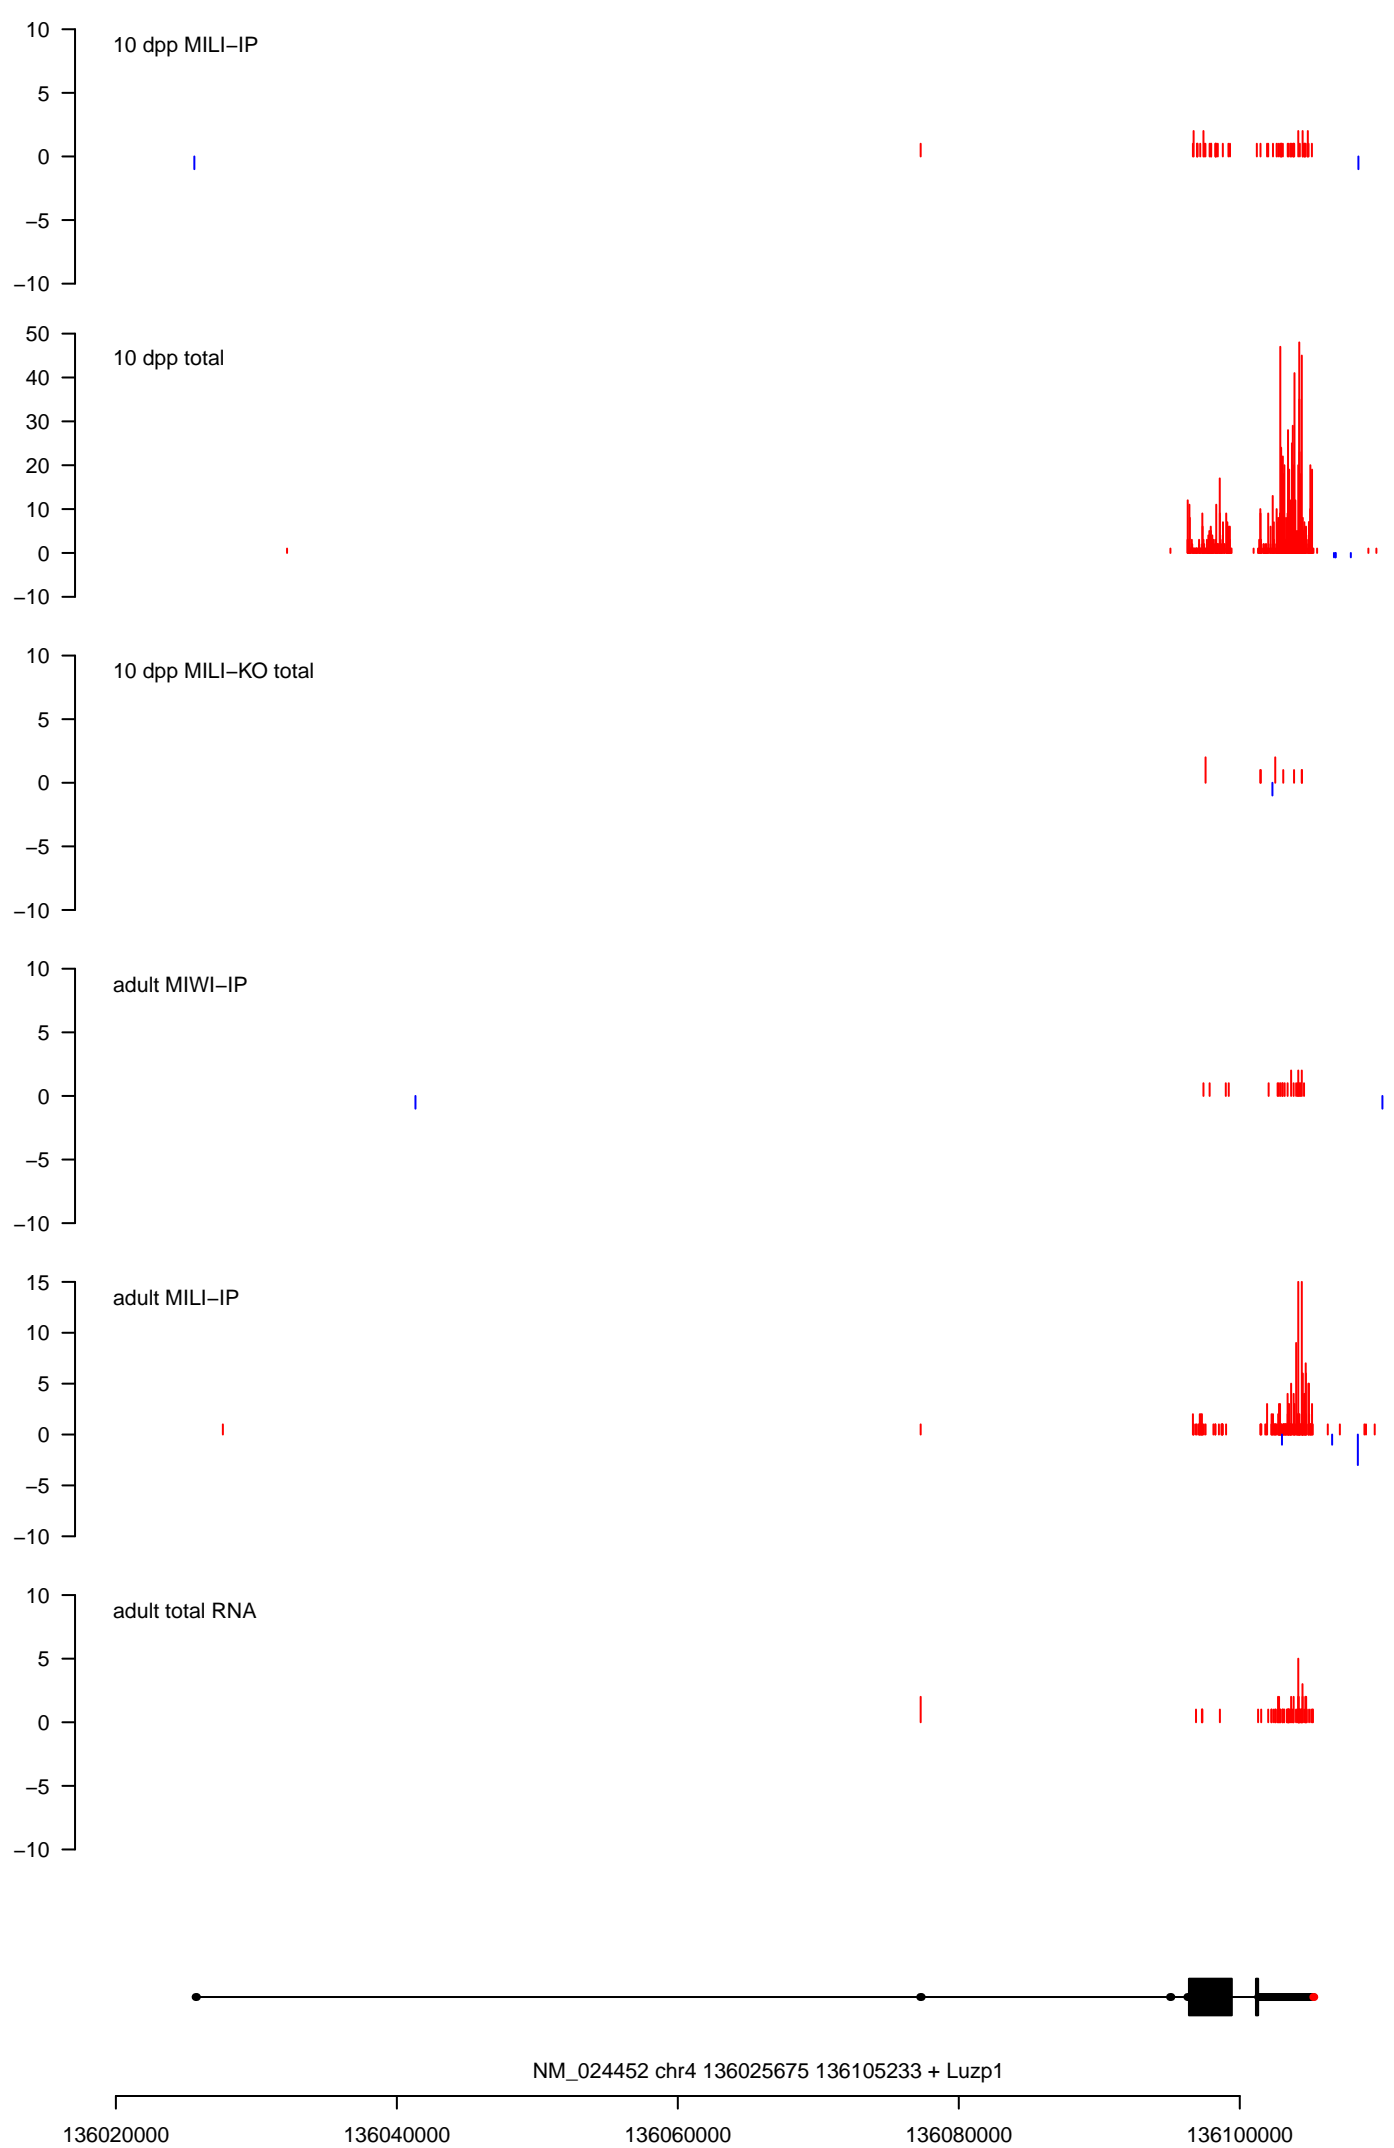

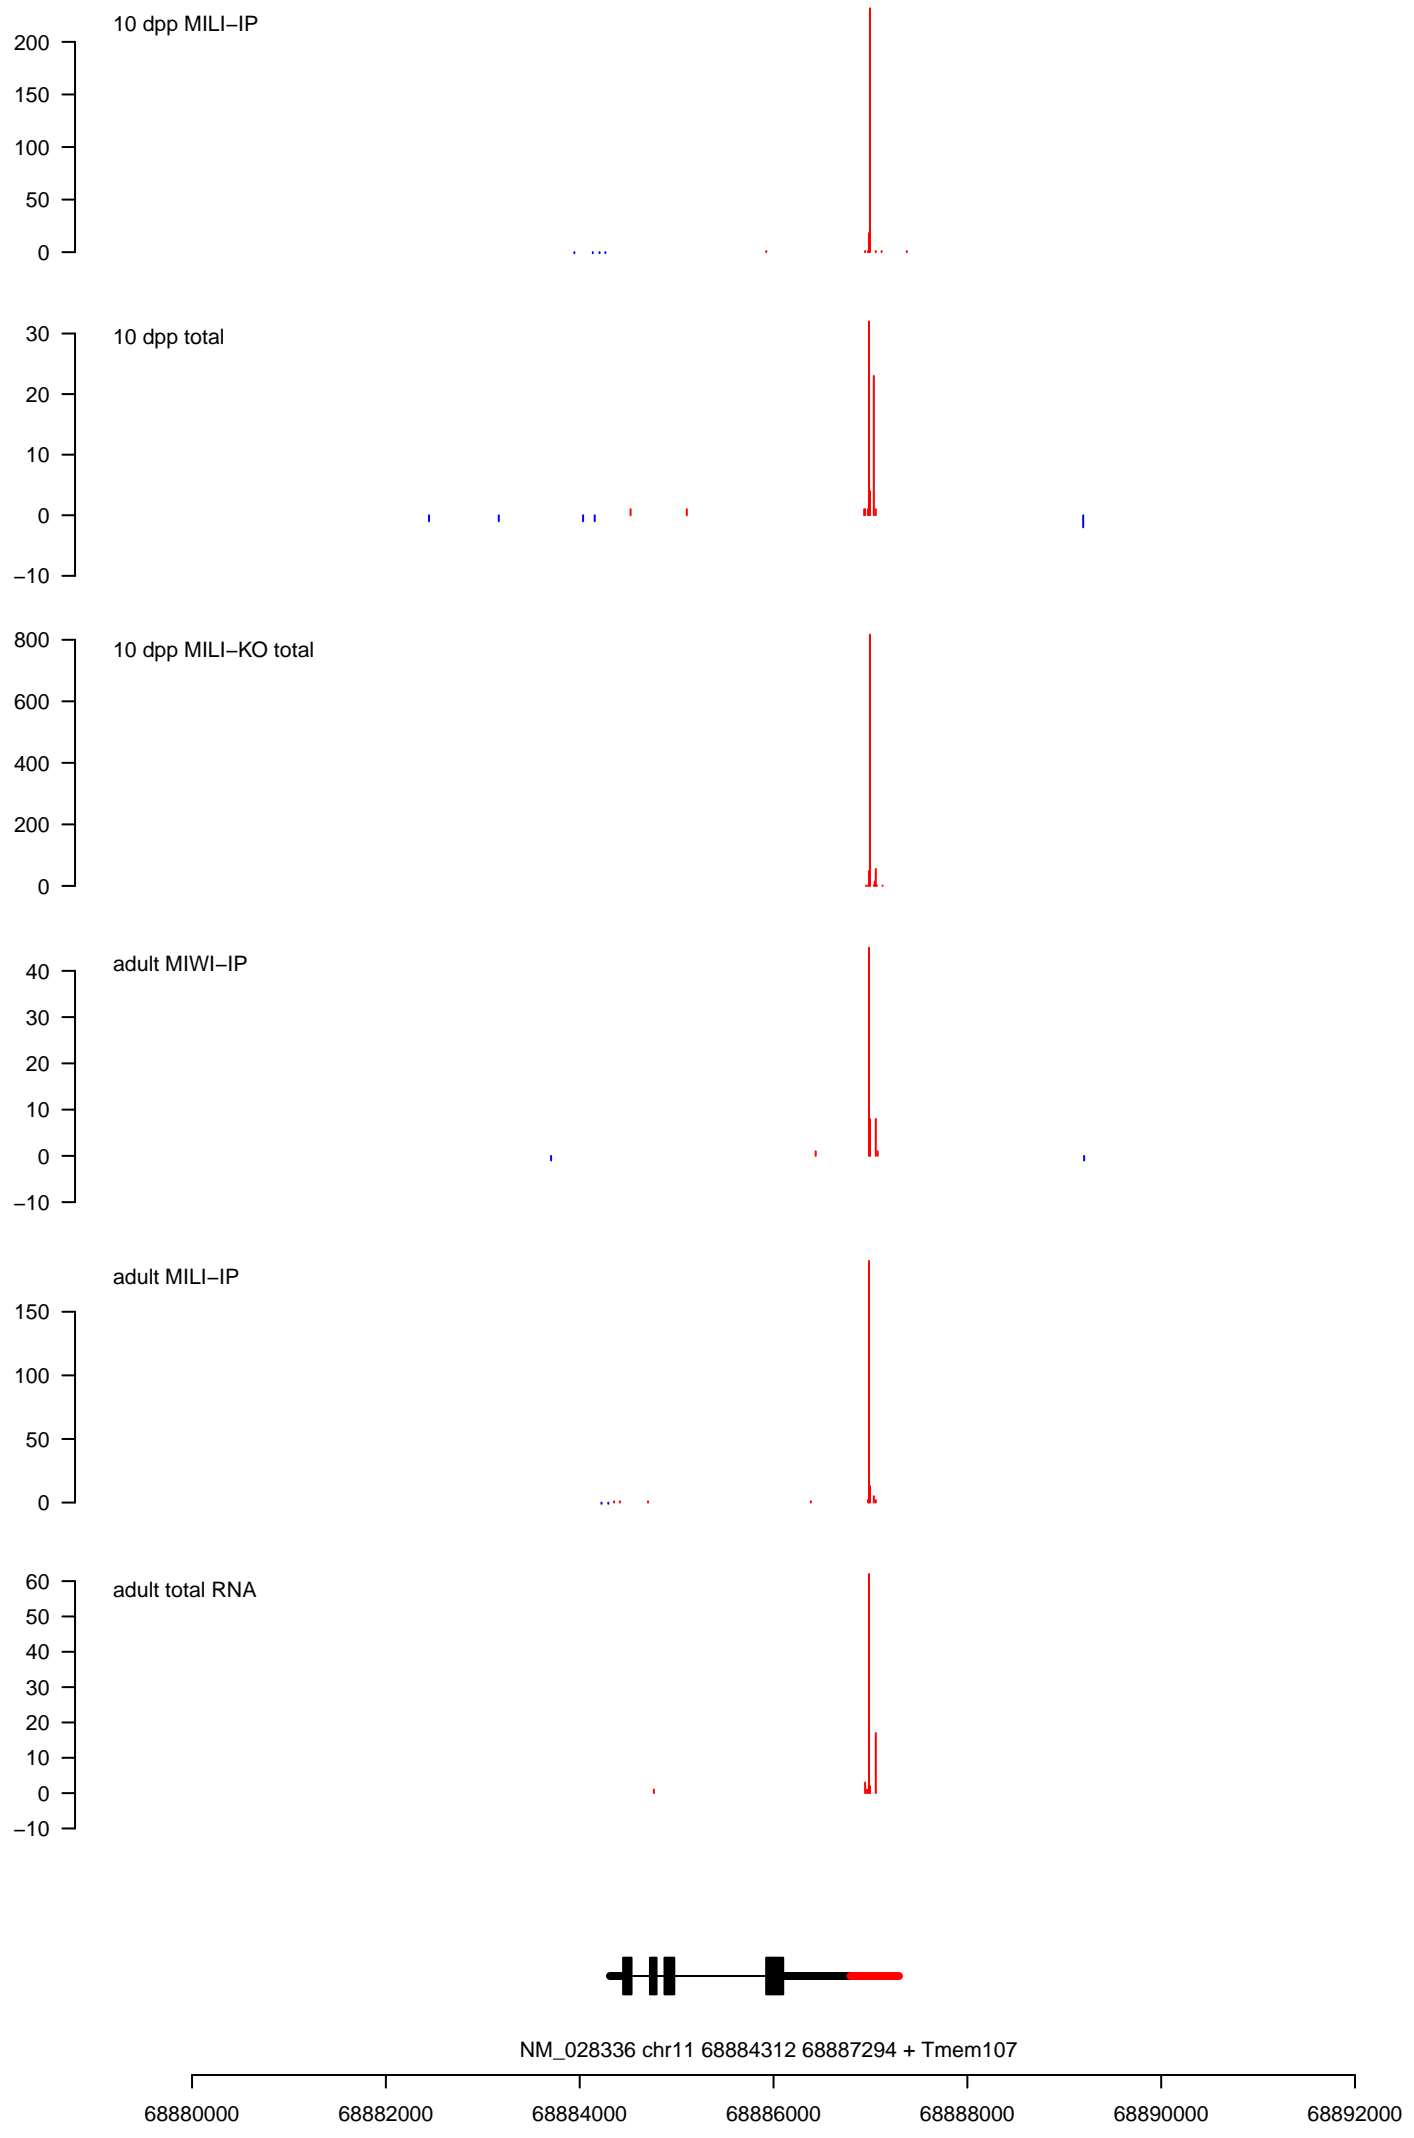

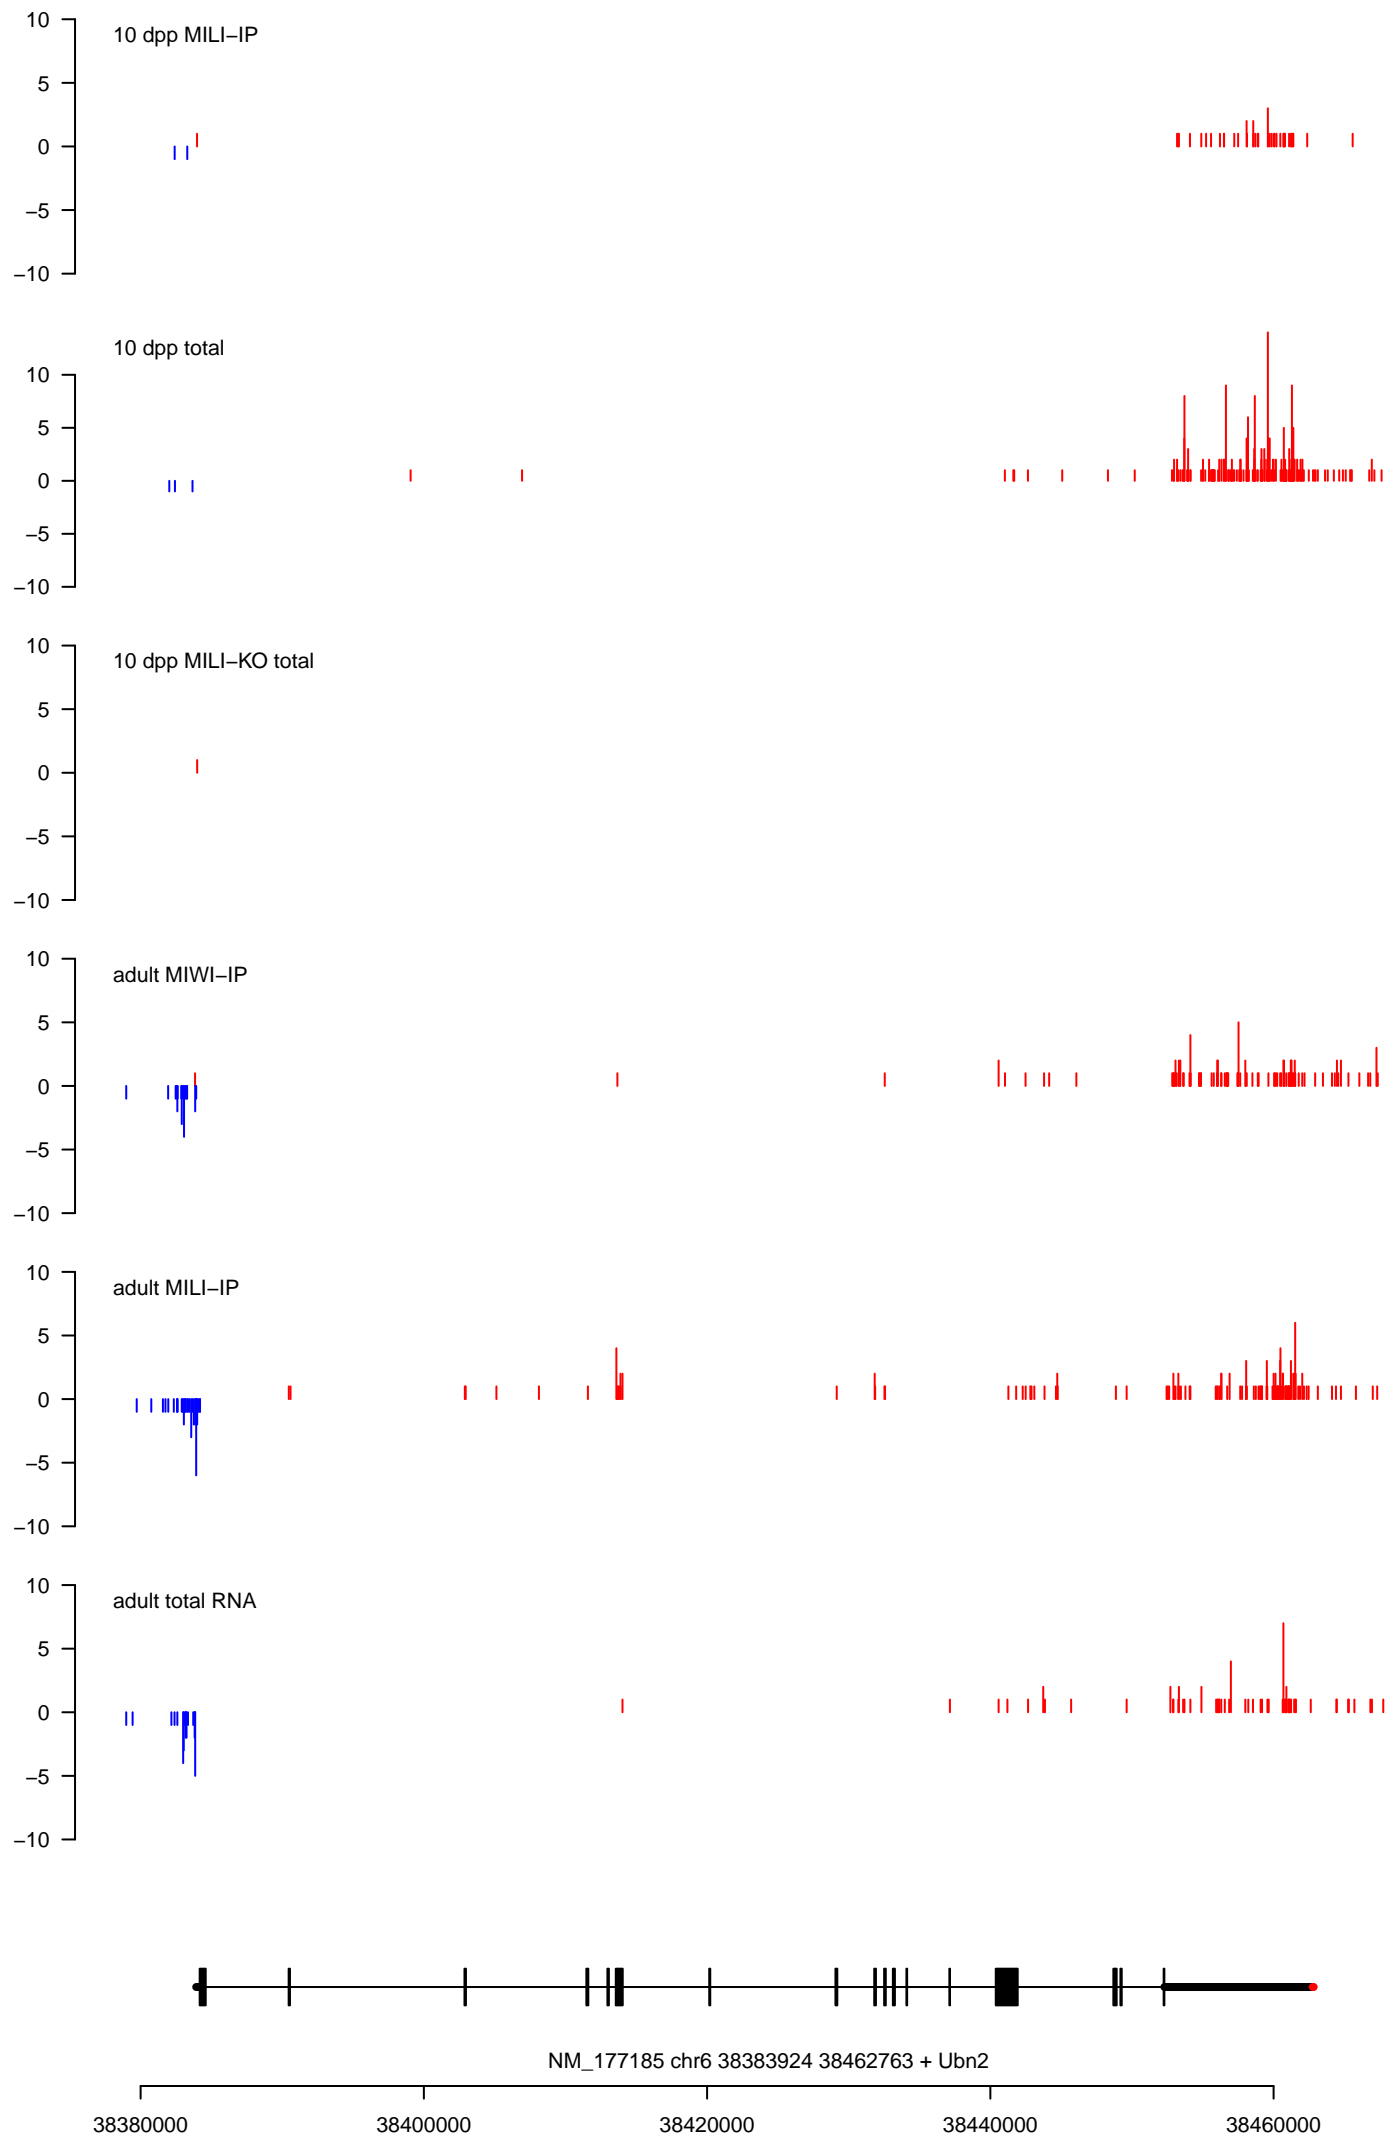



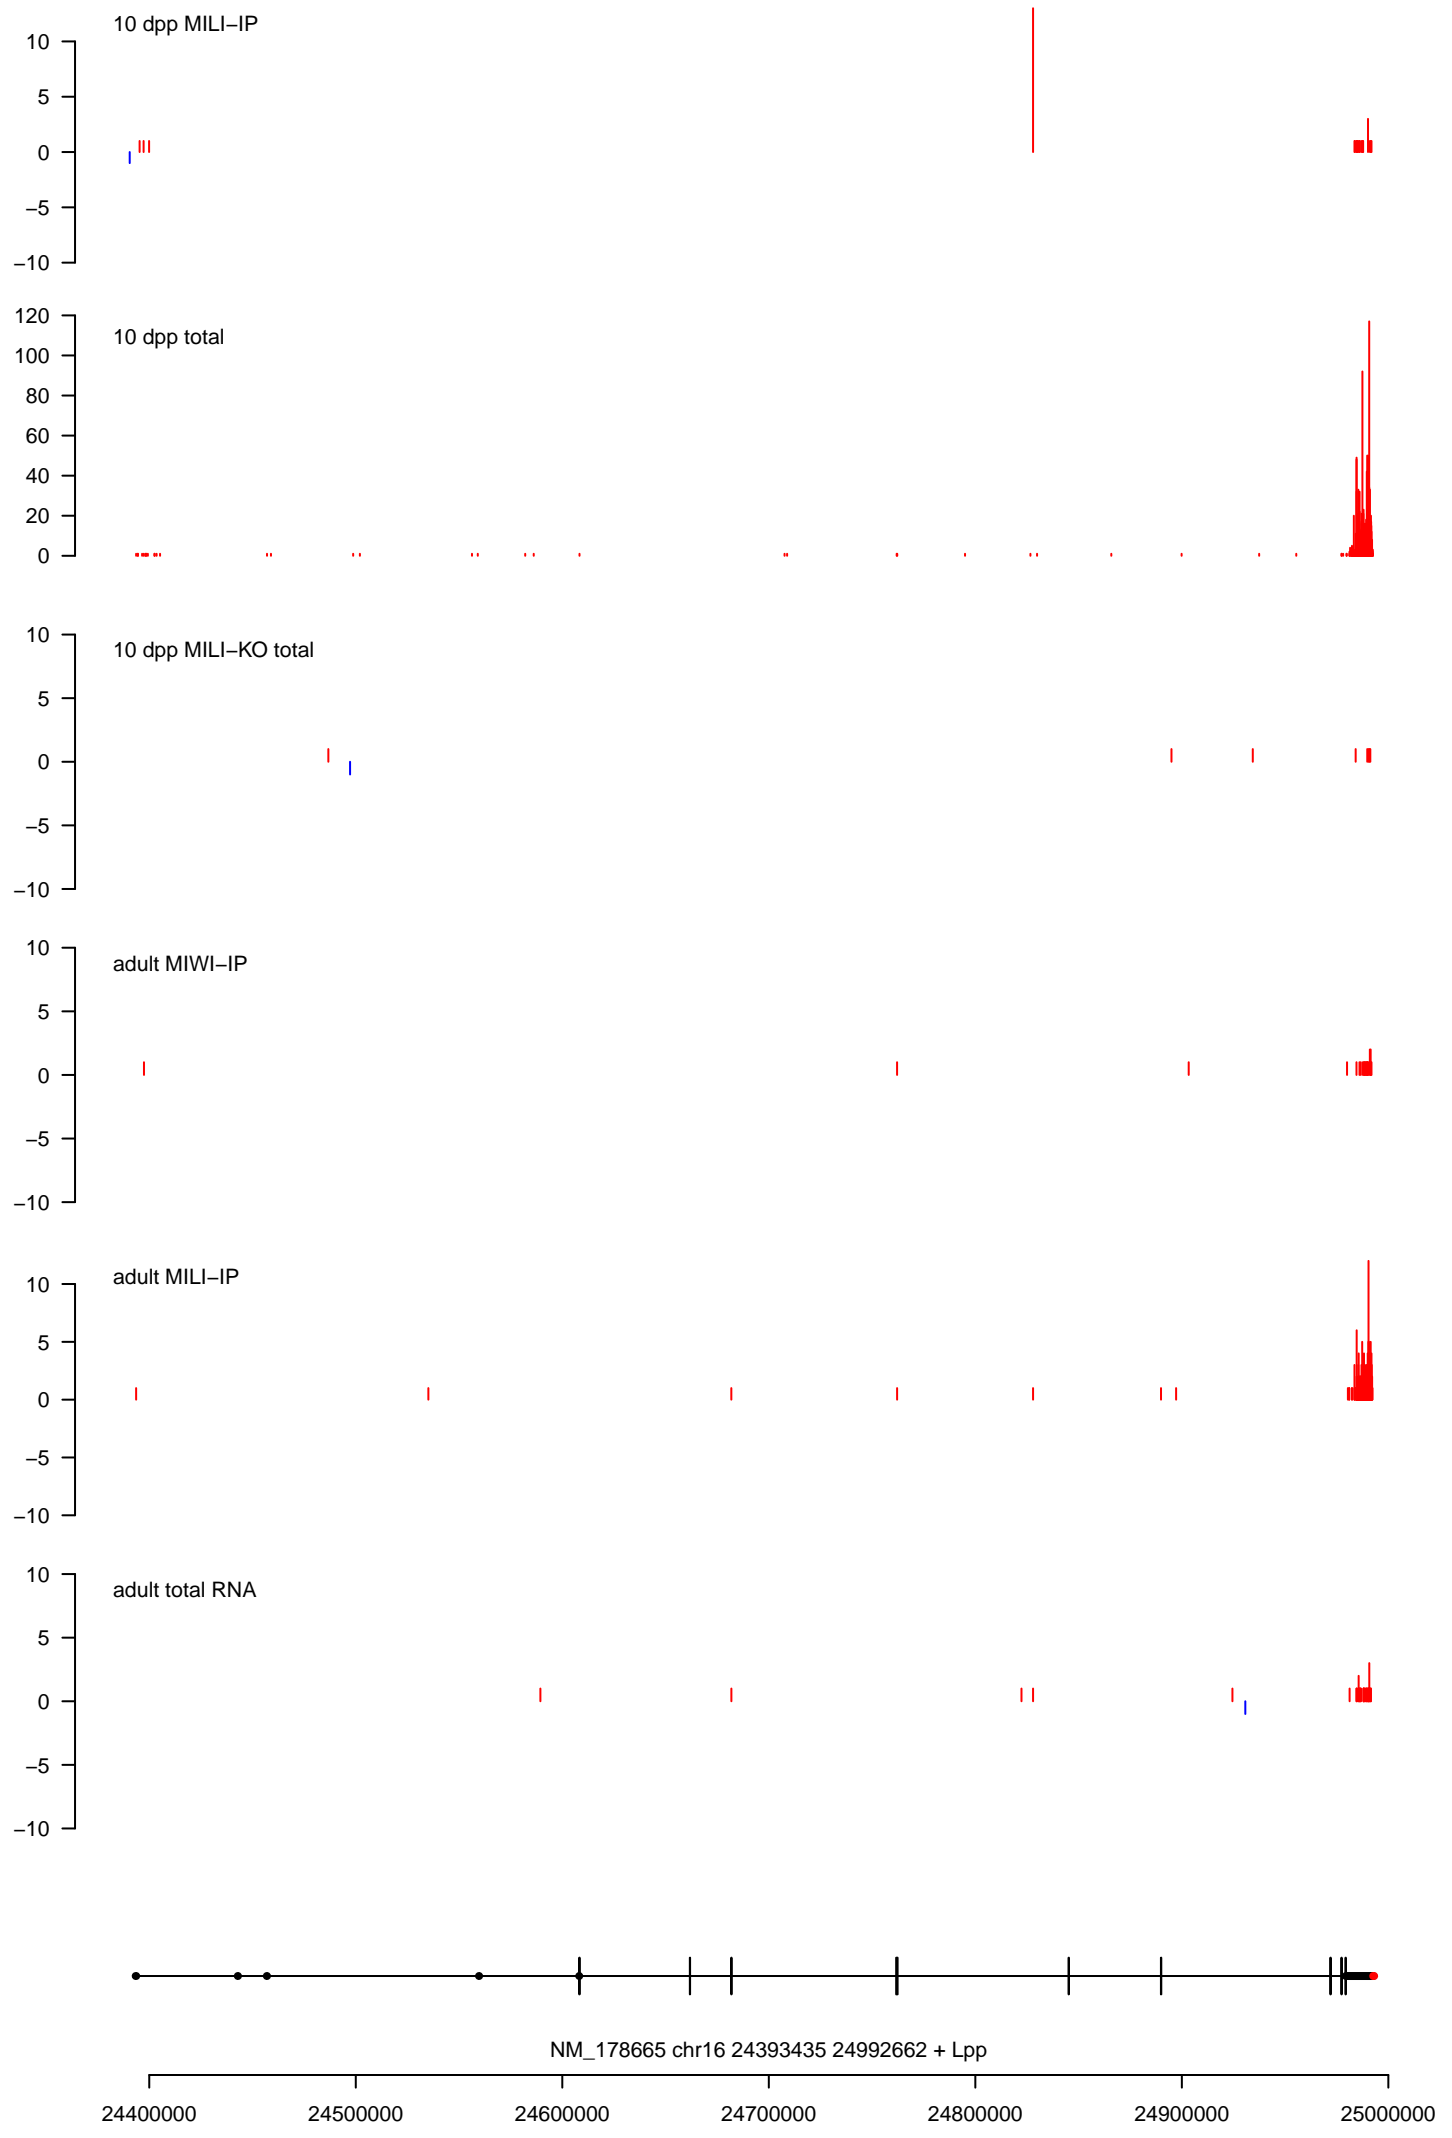

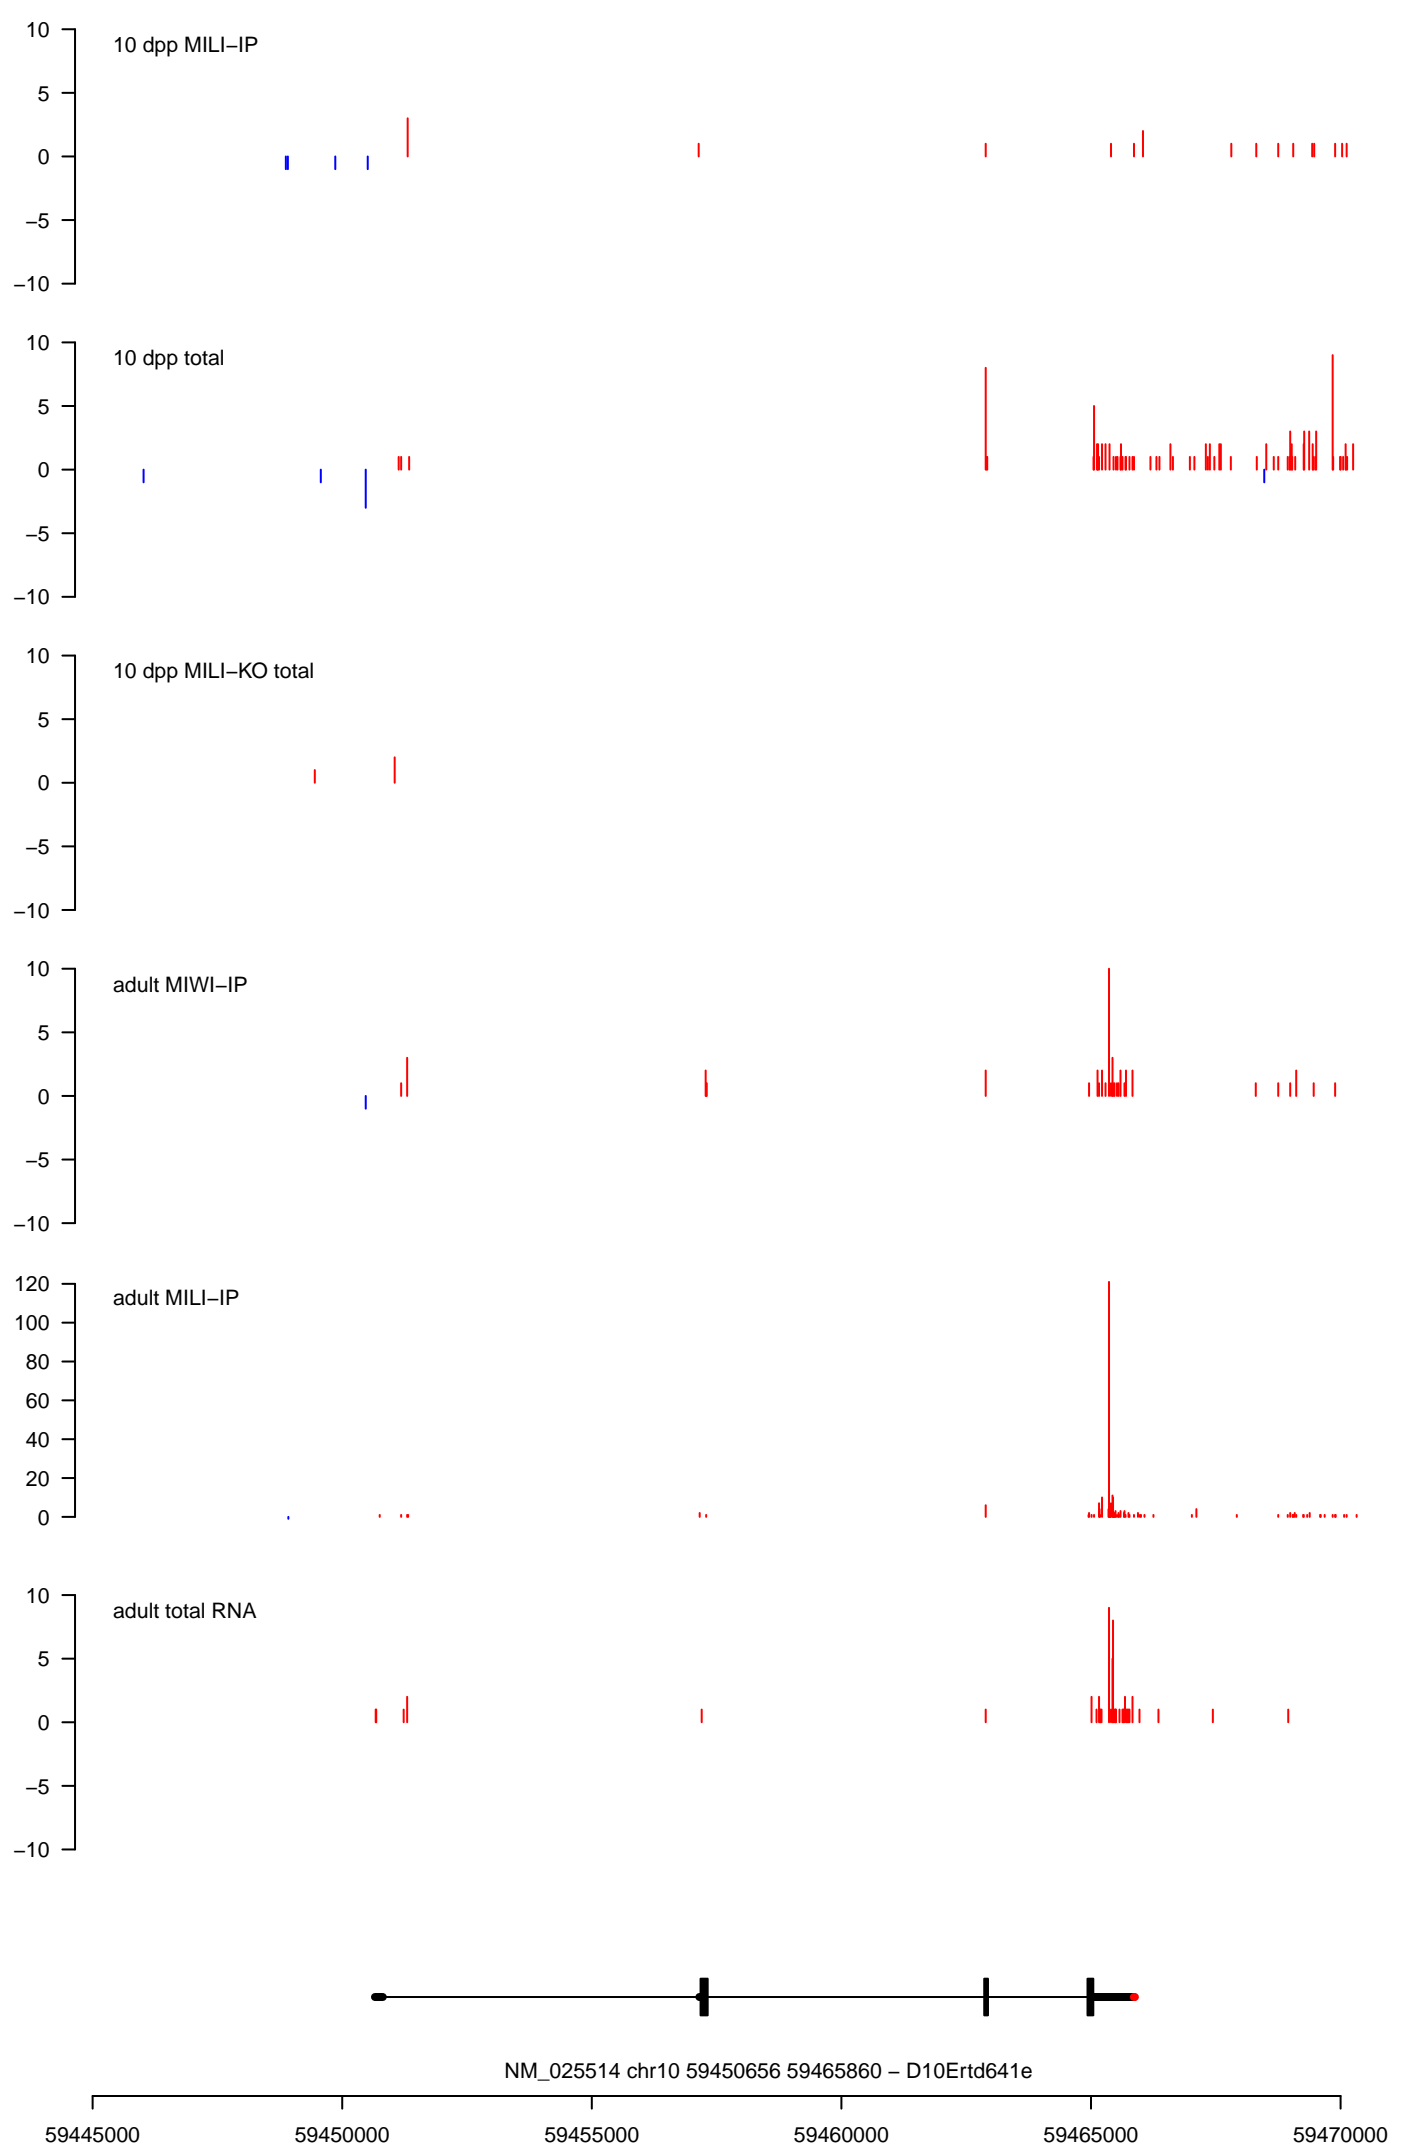

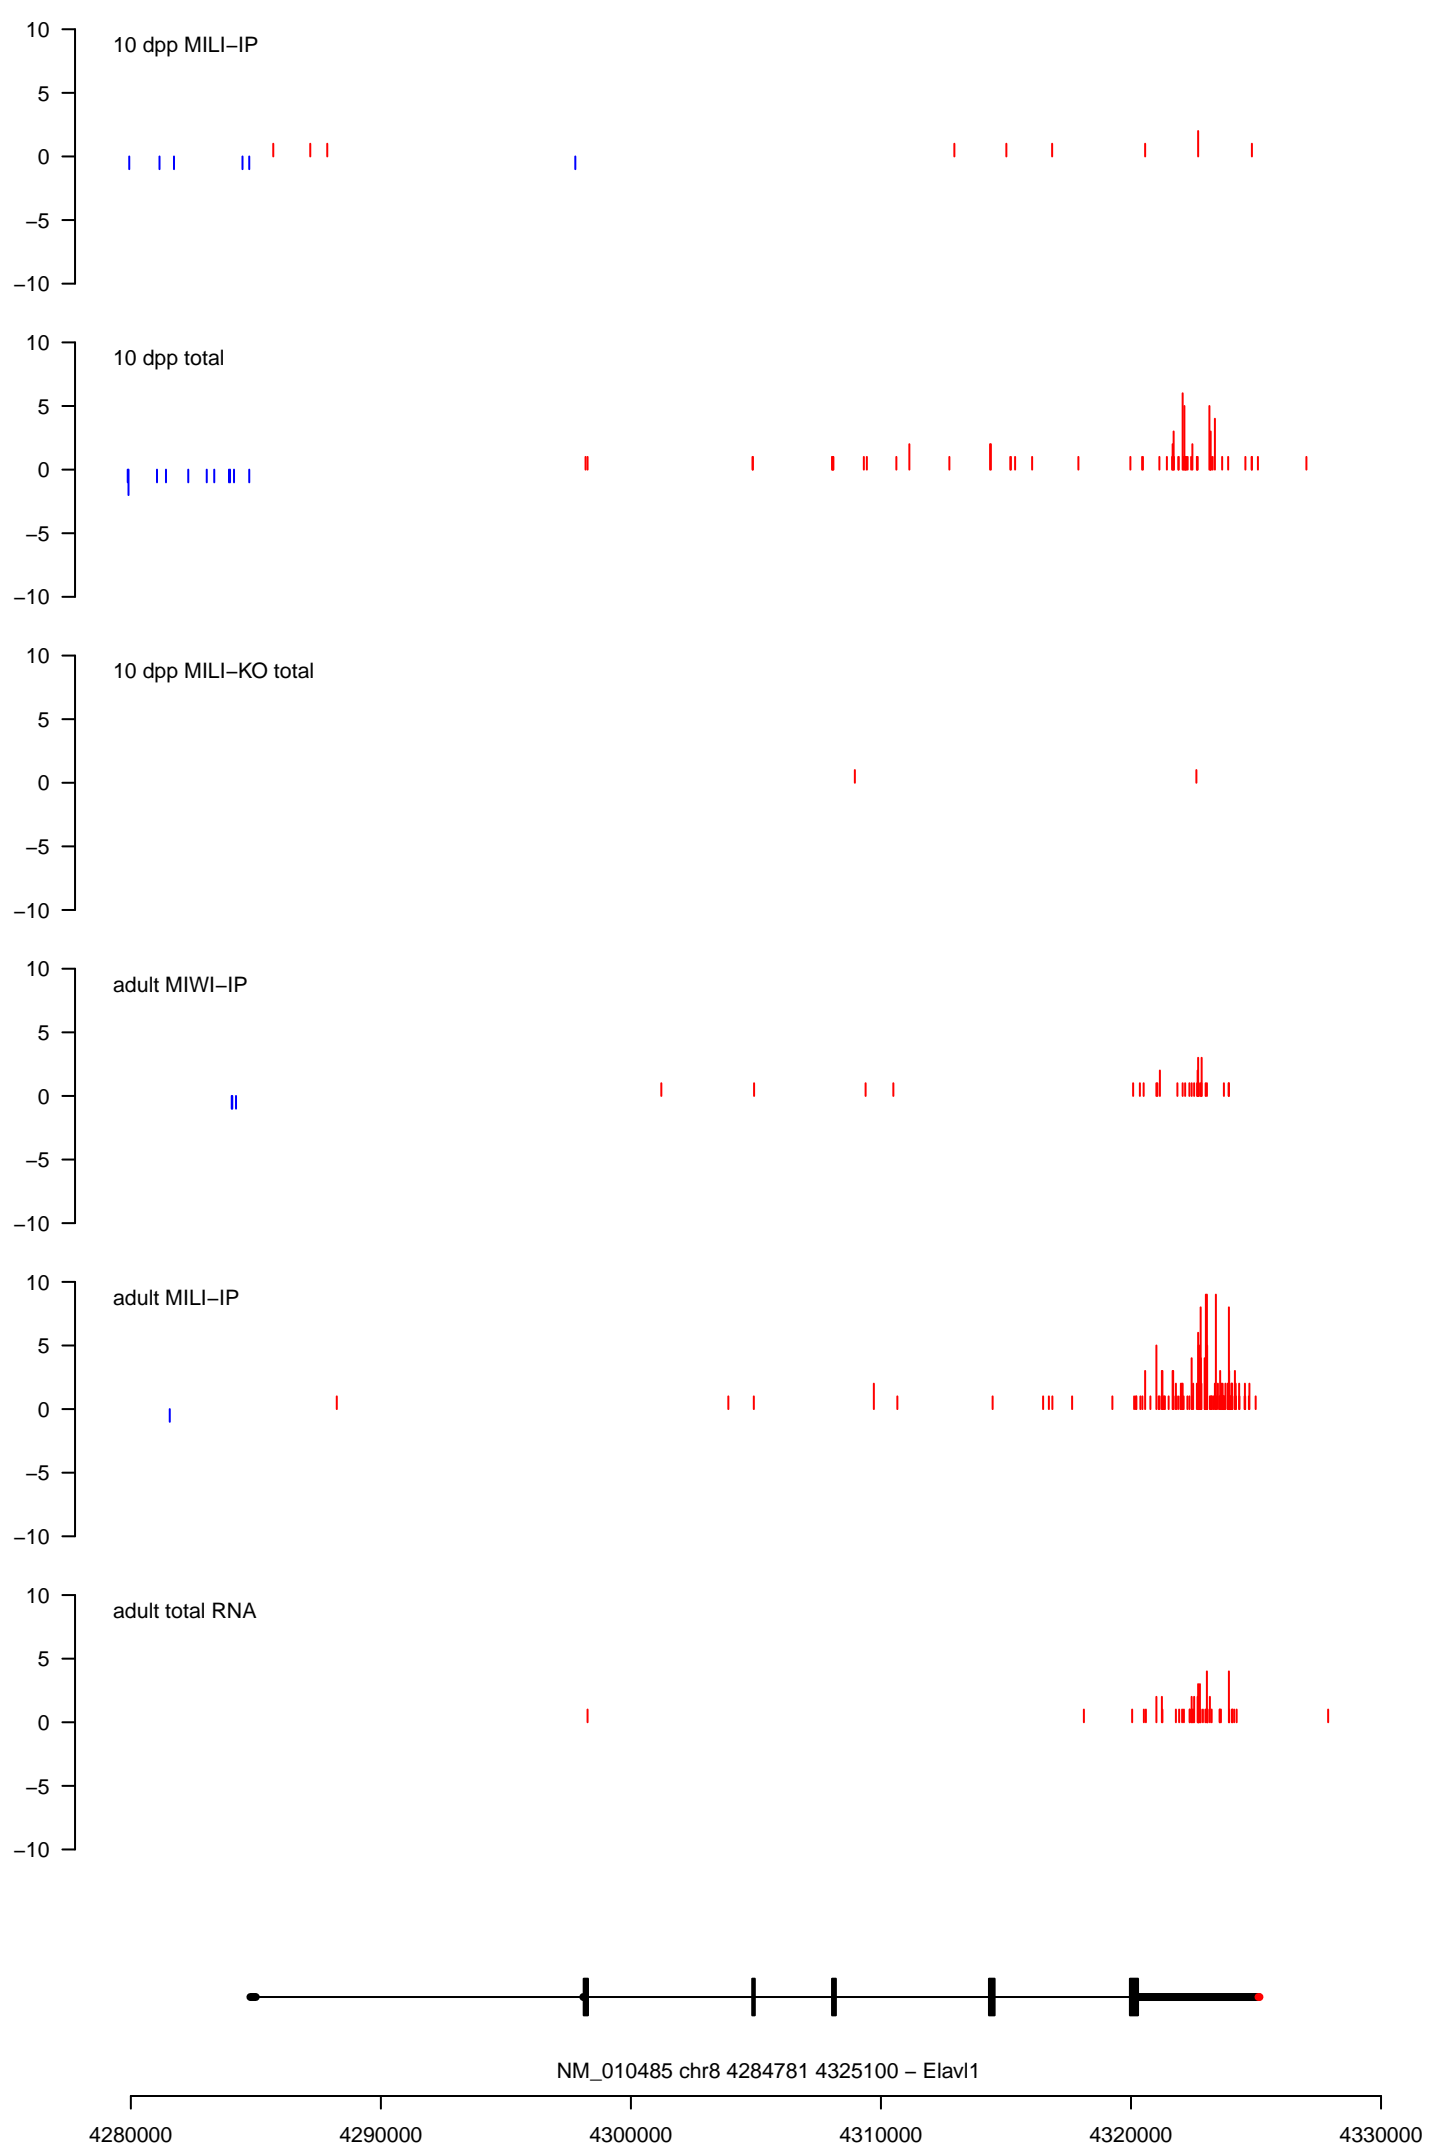

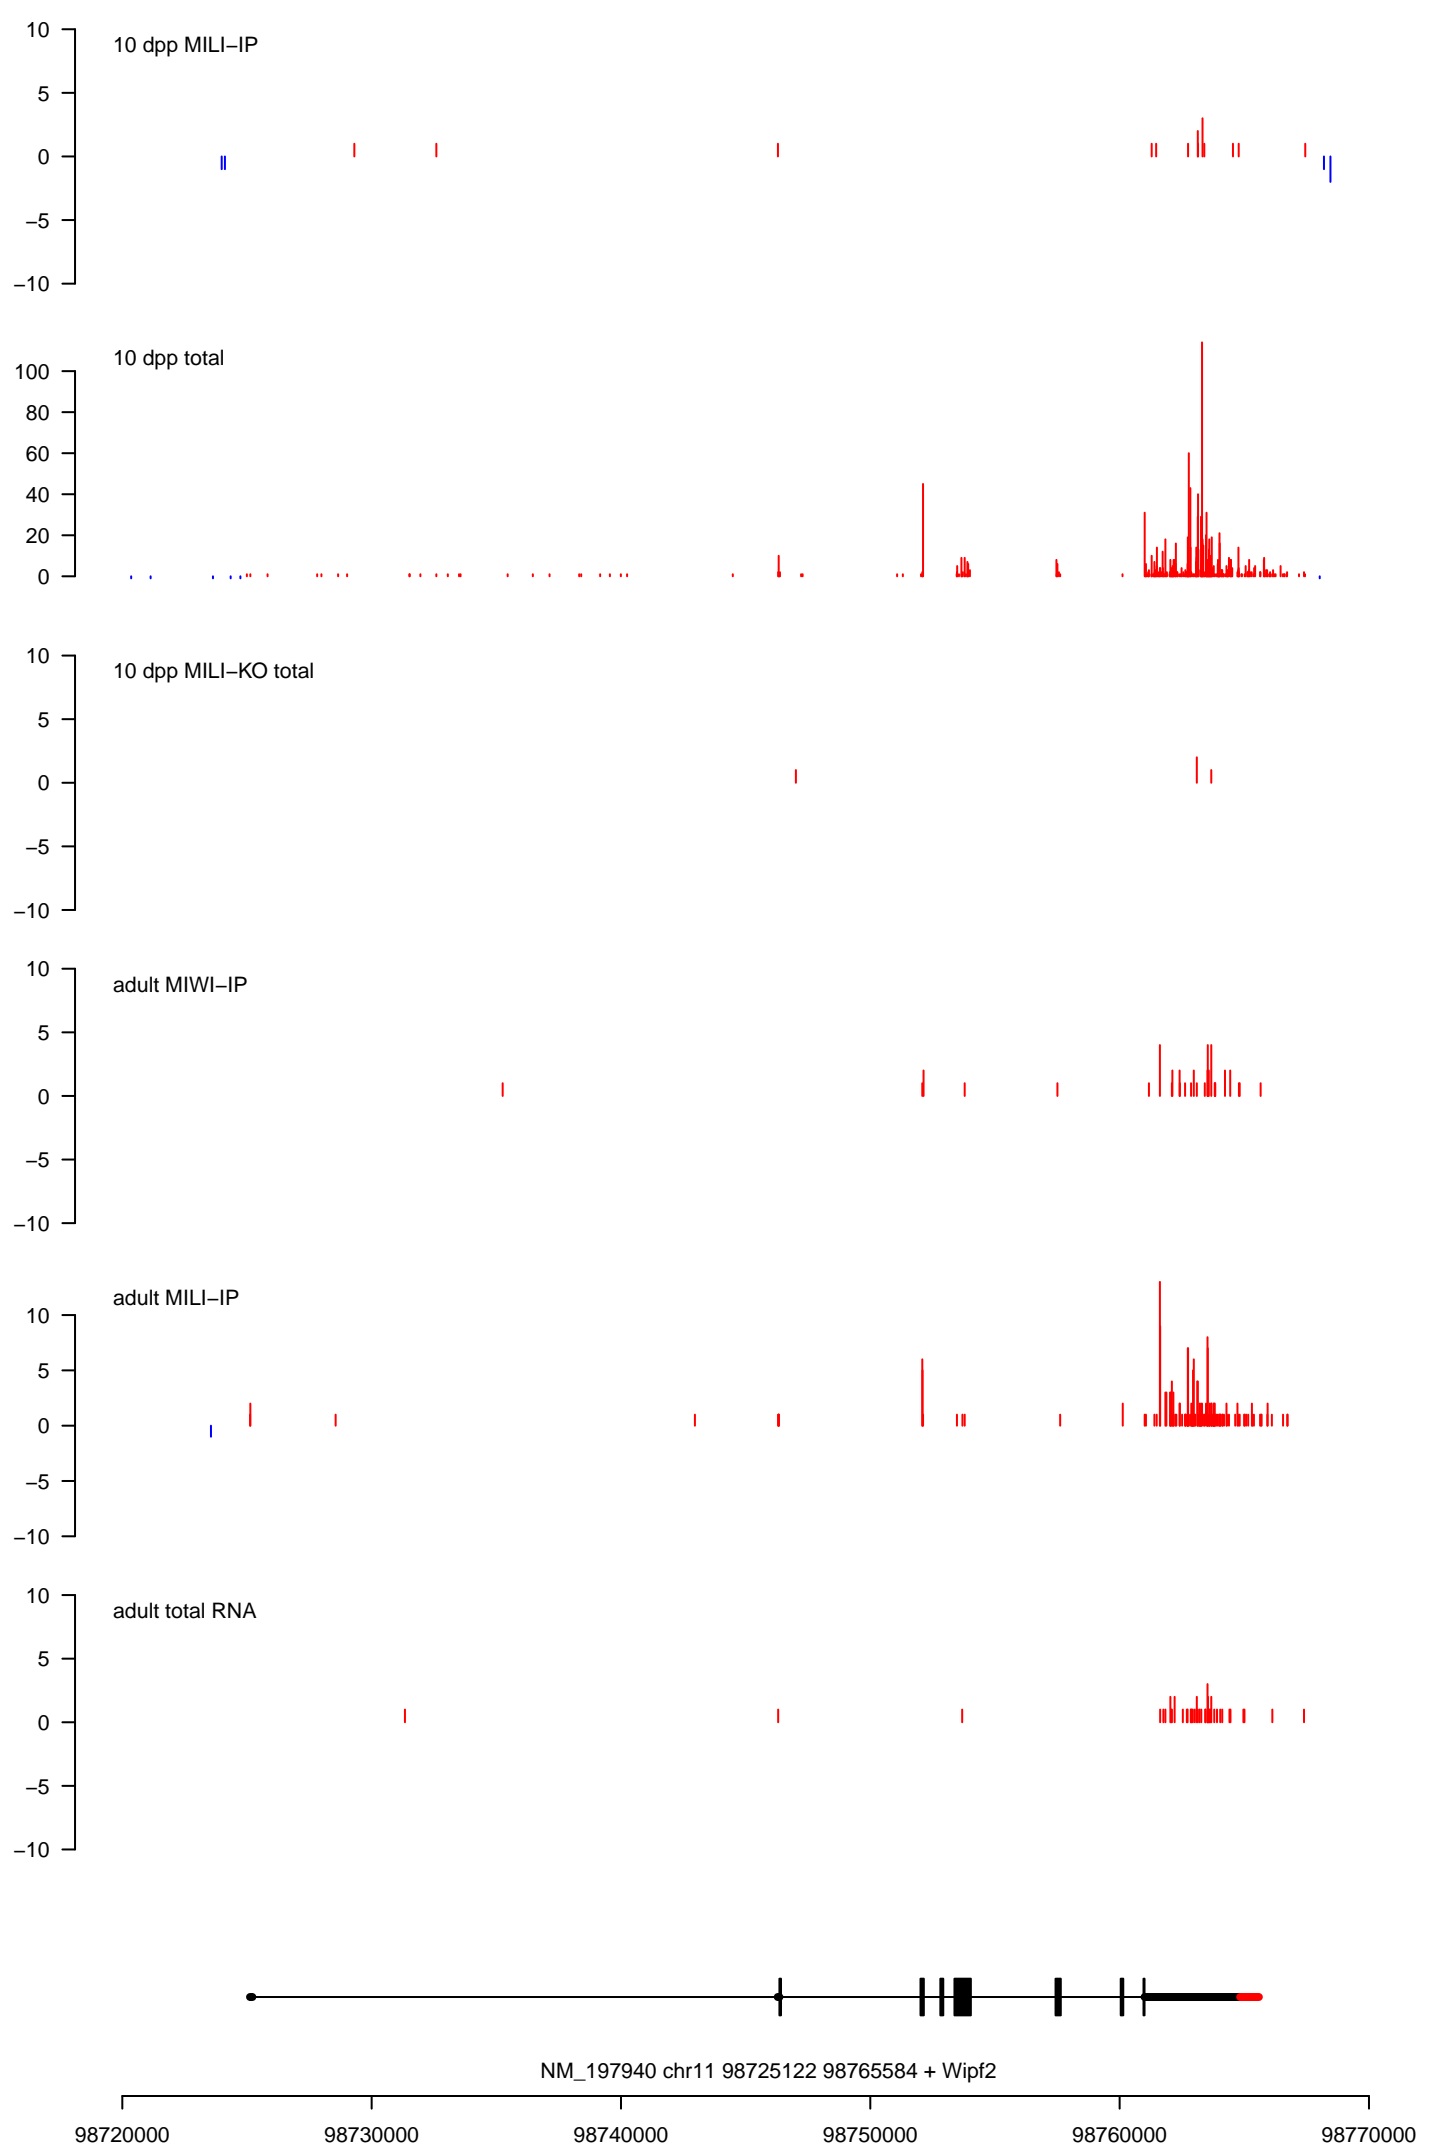

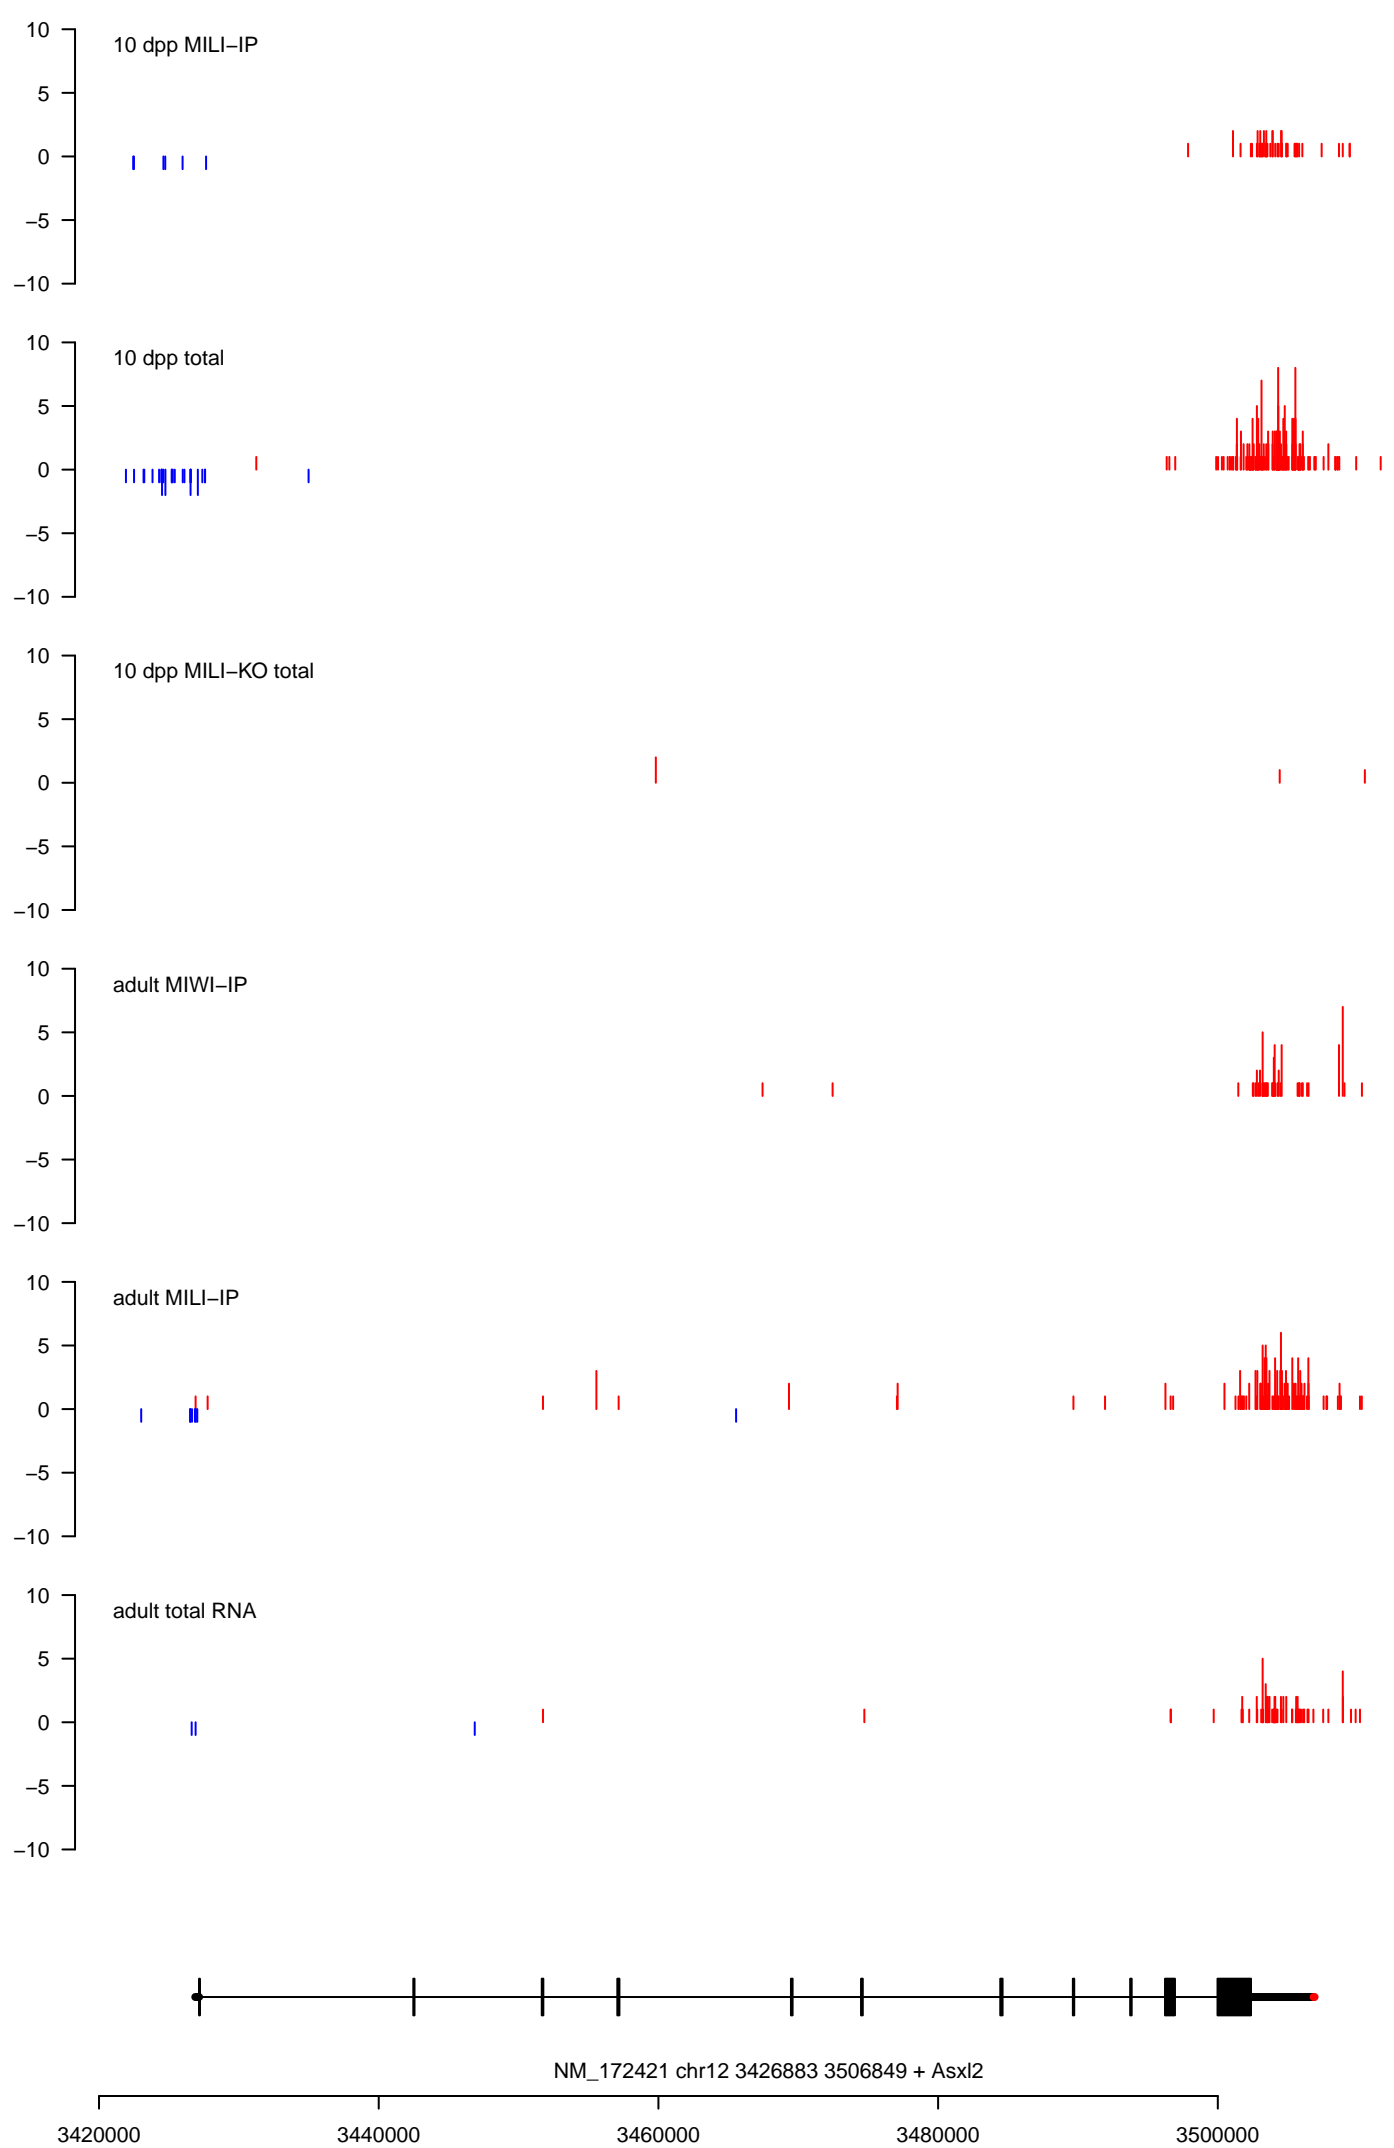

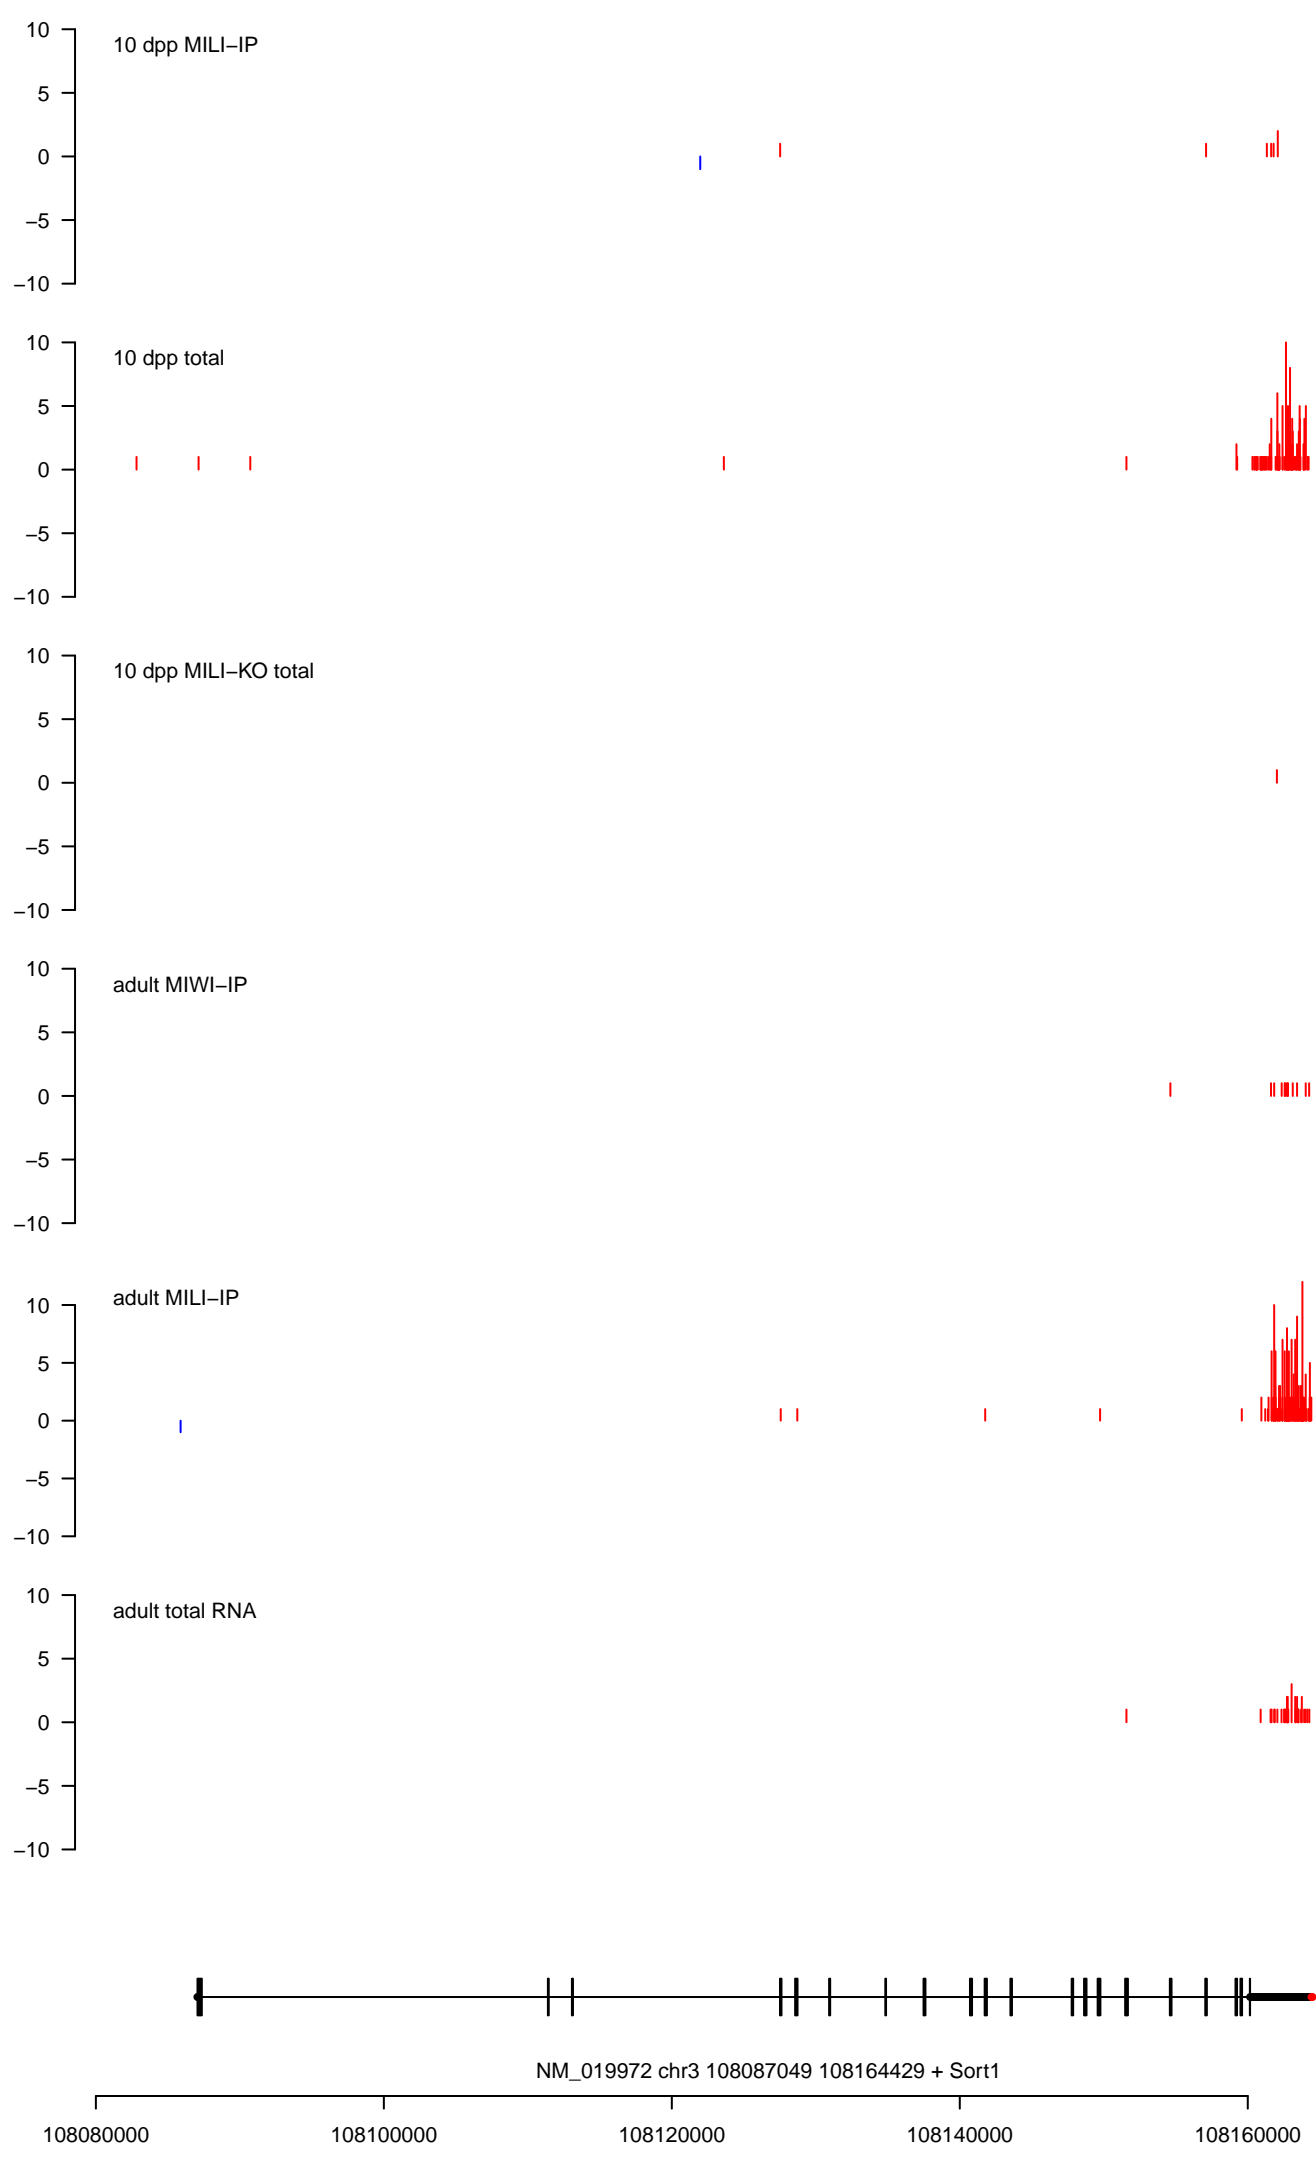

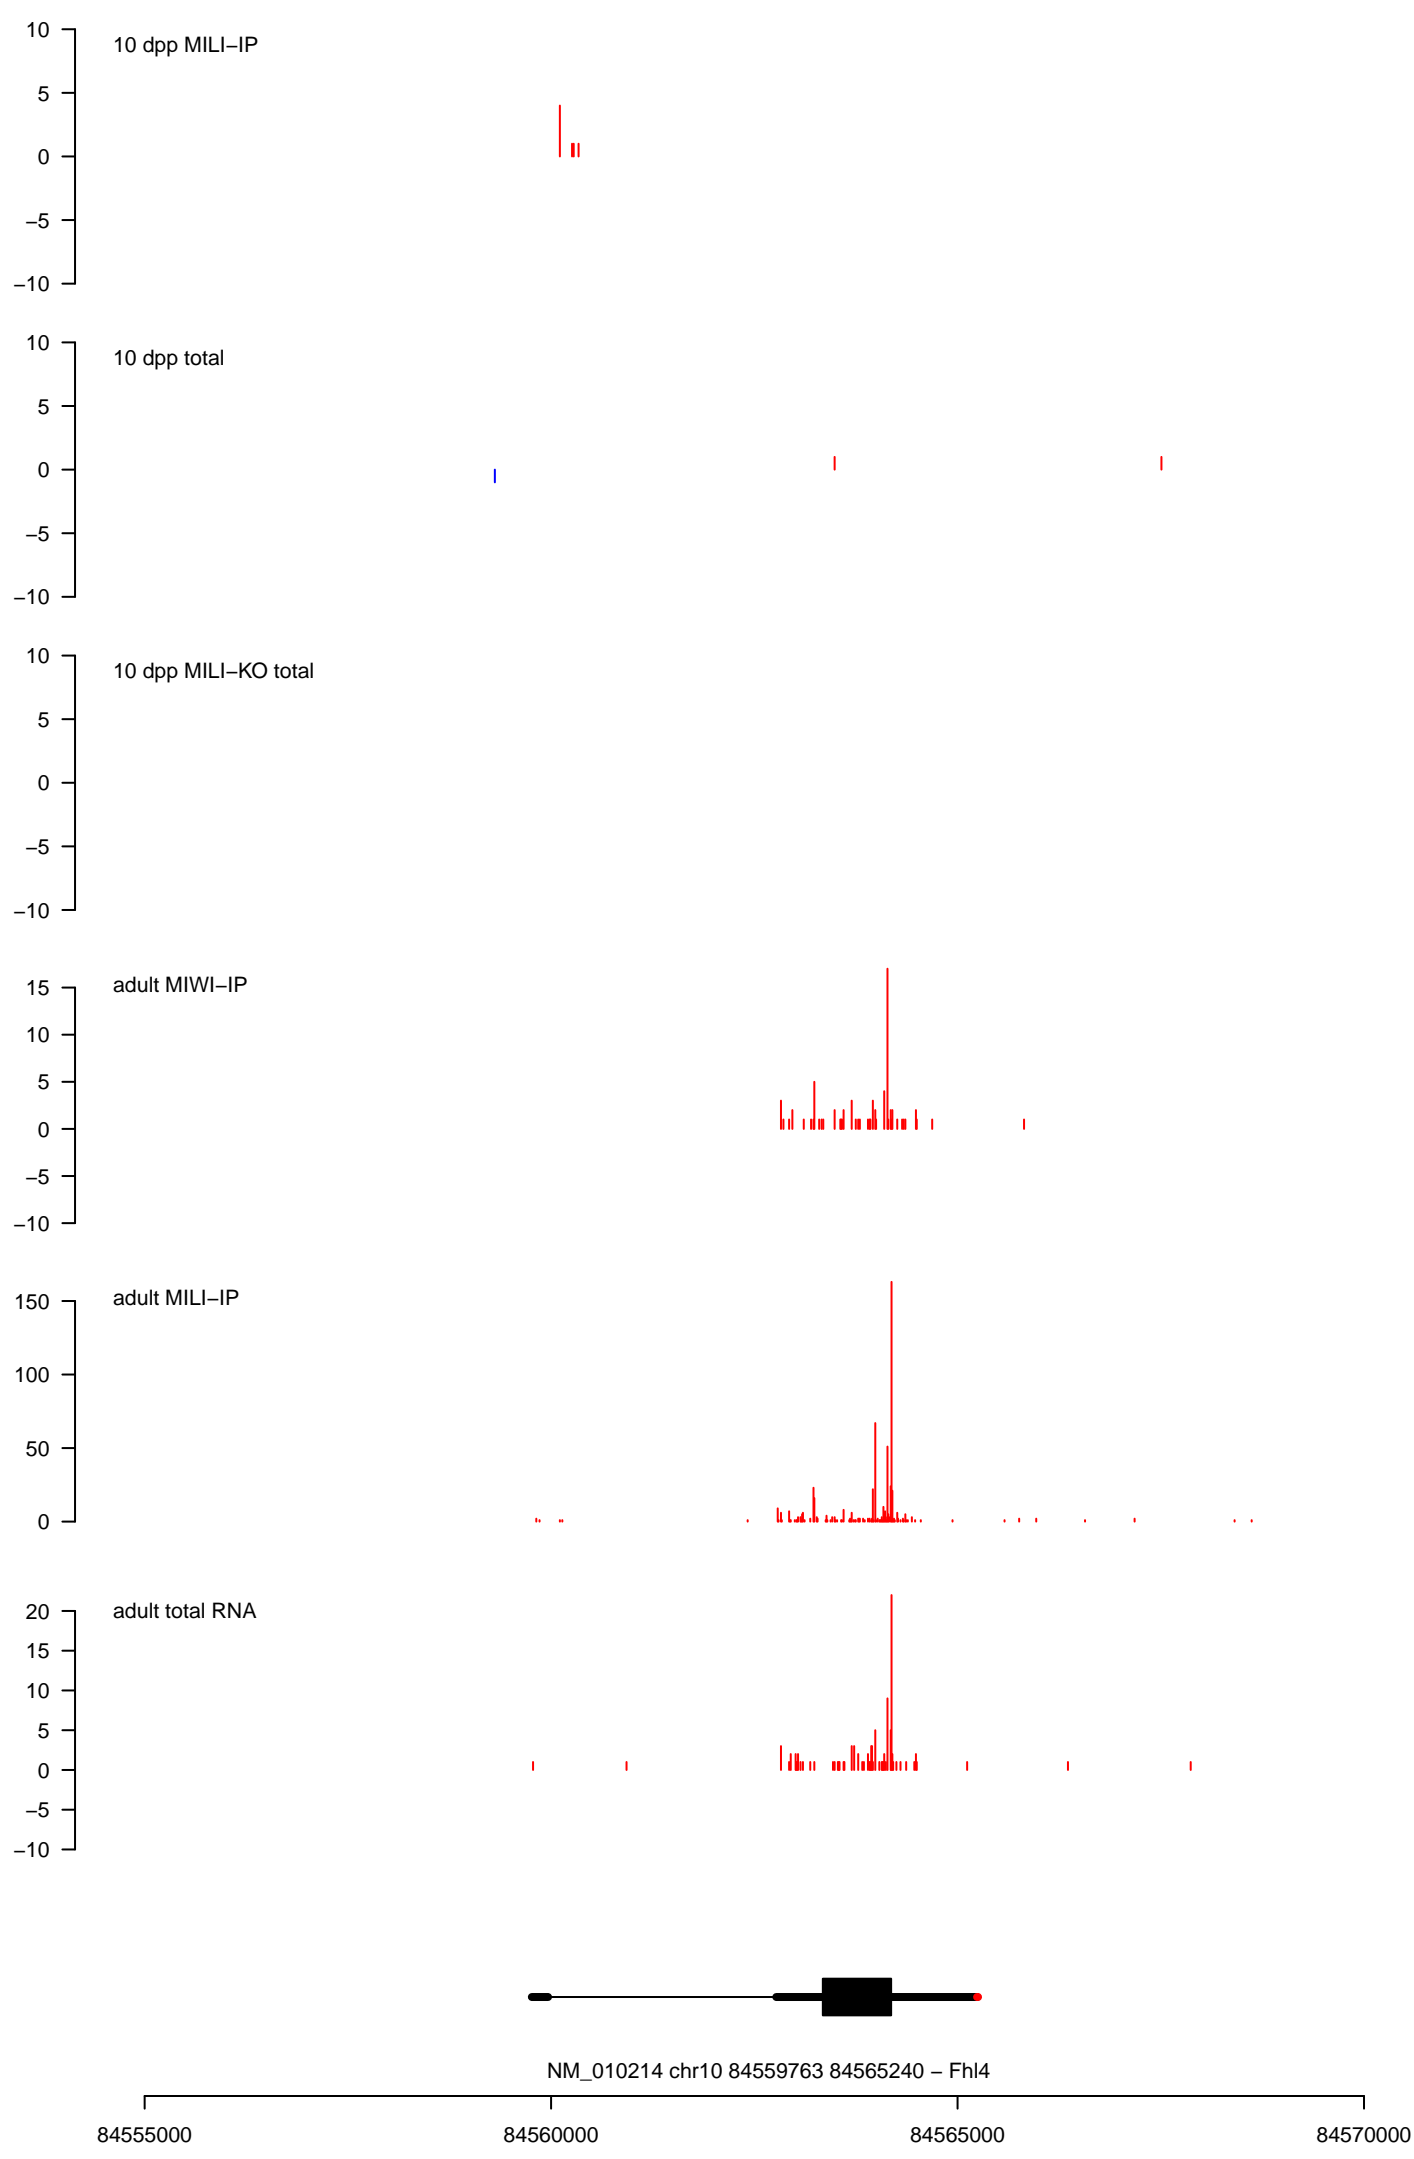

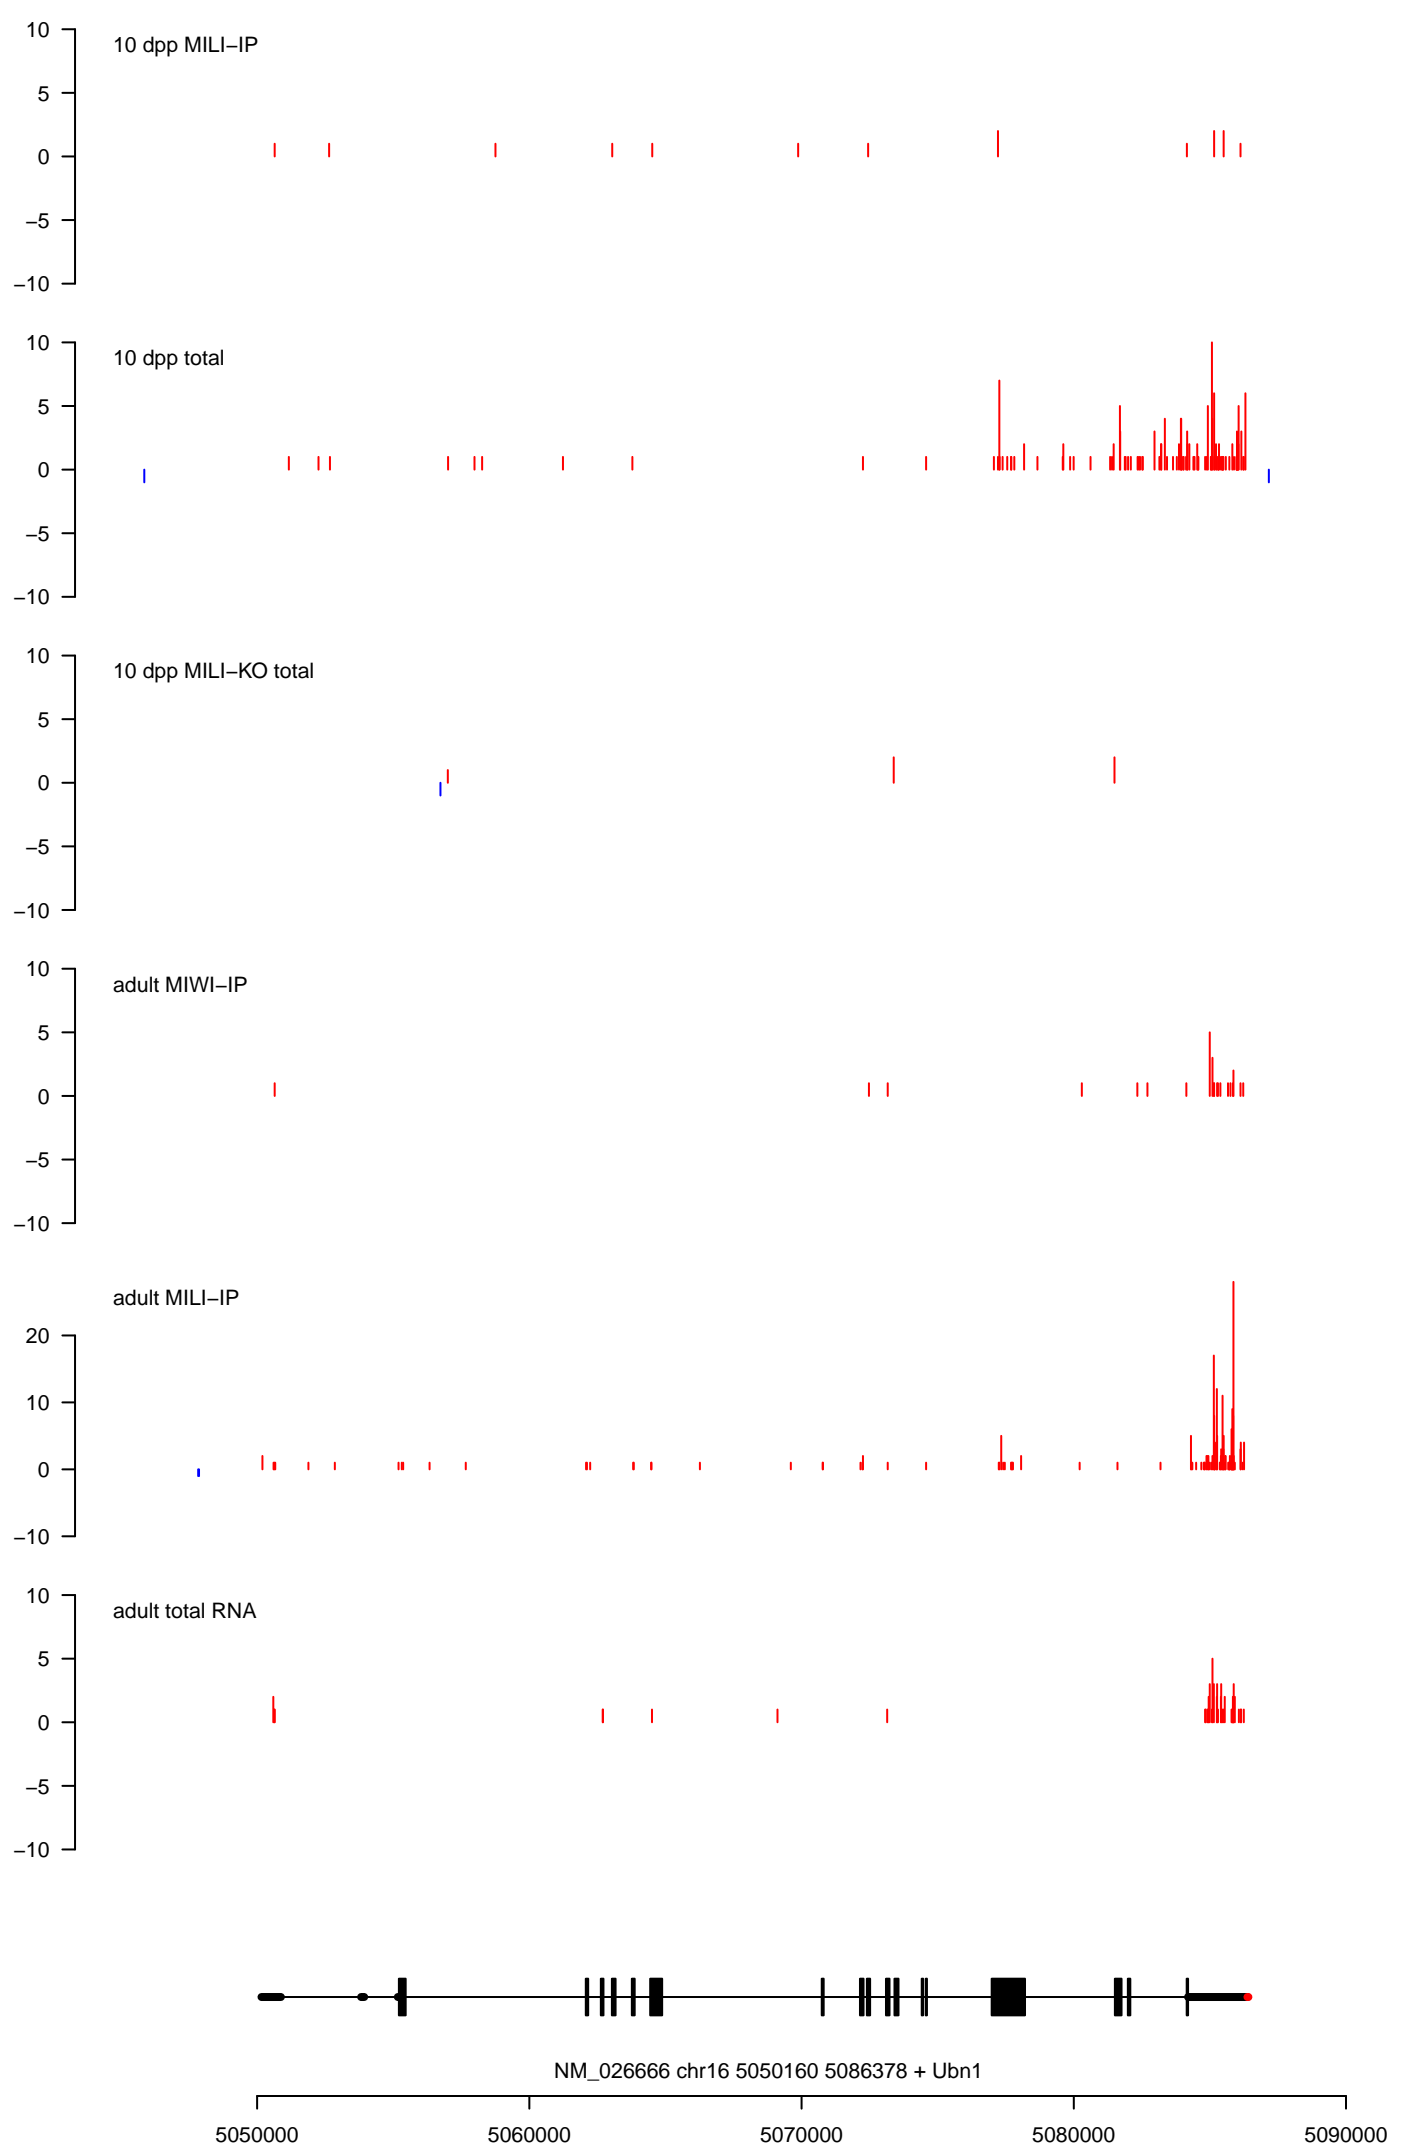



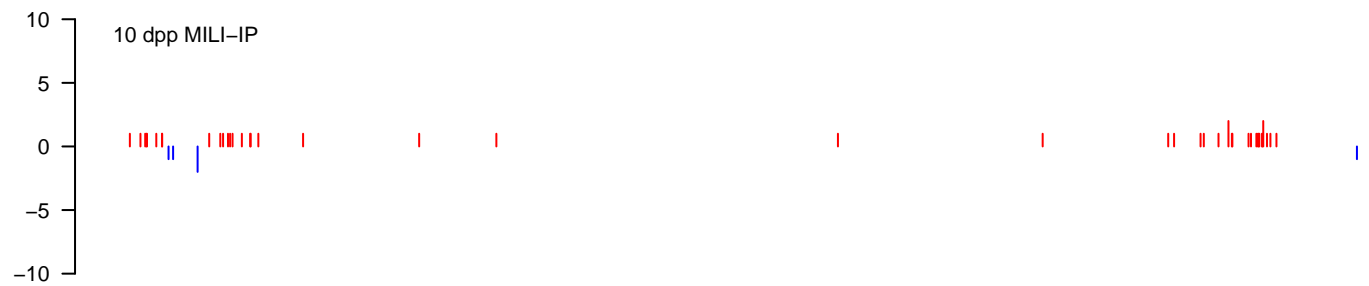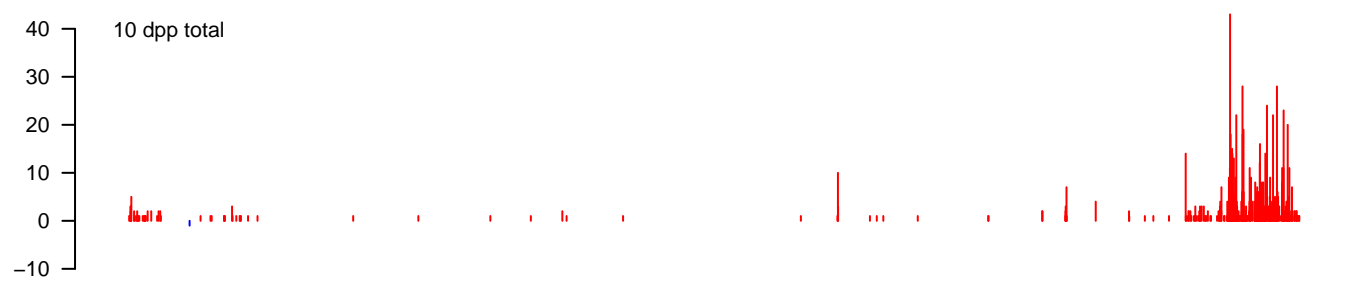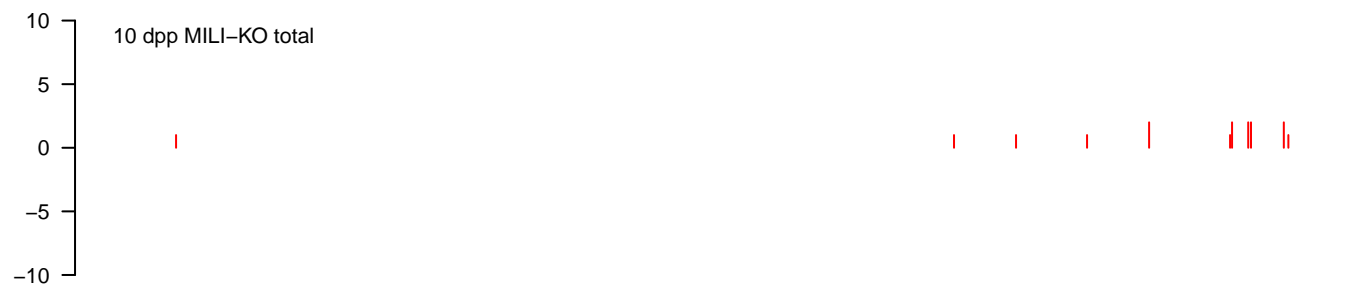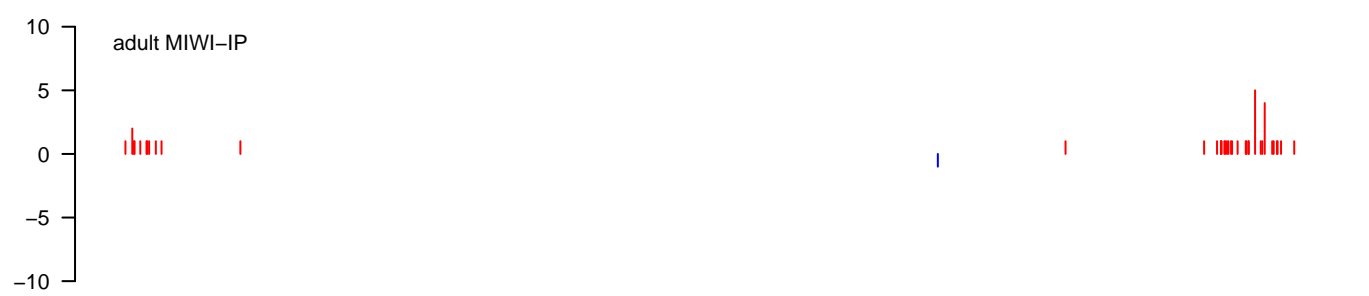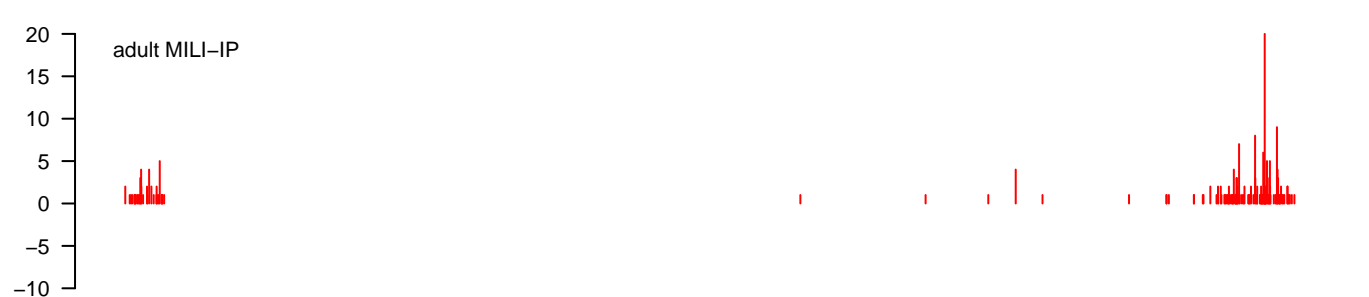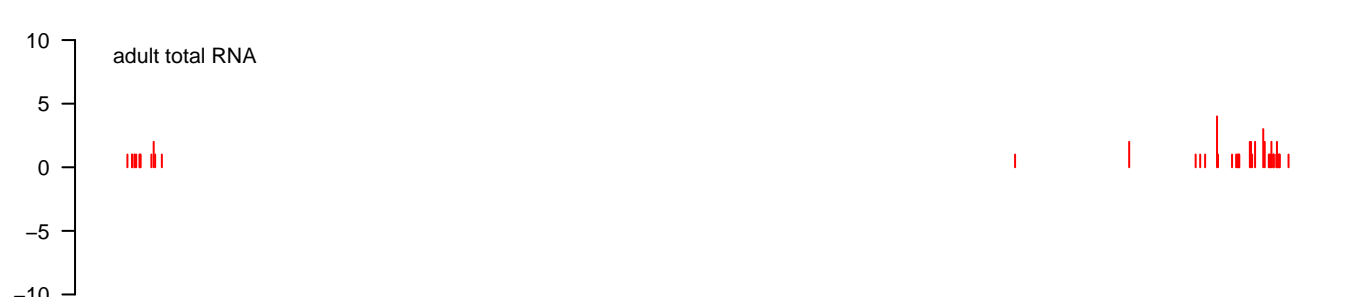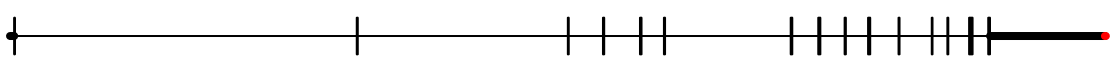

NM\_028149 chr11 97943867 98010930 - Fbxl20

97940000 97960000 97980000 98000000

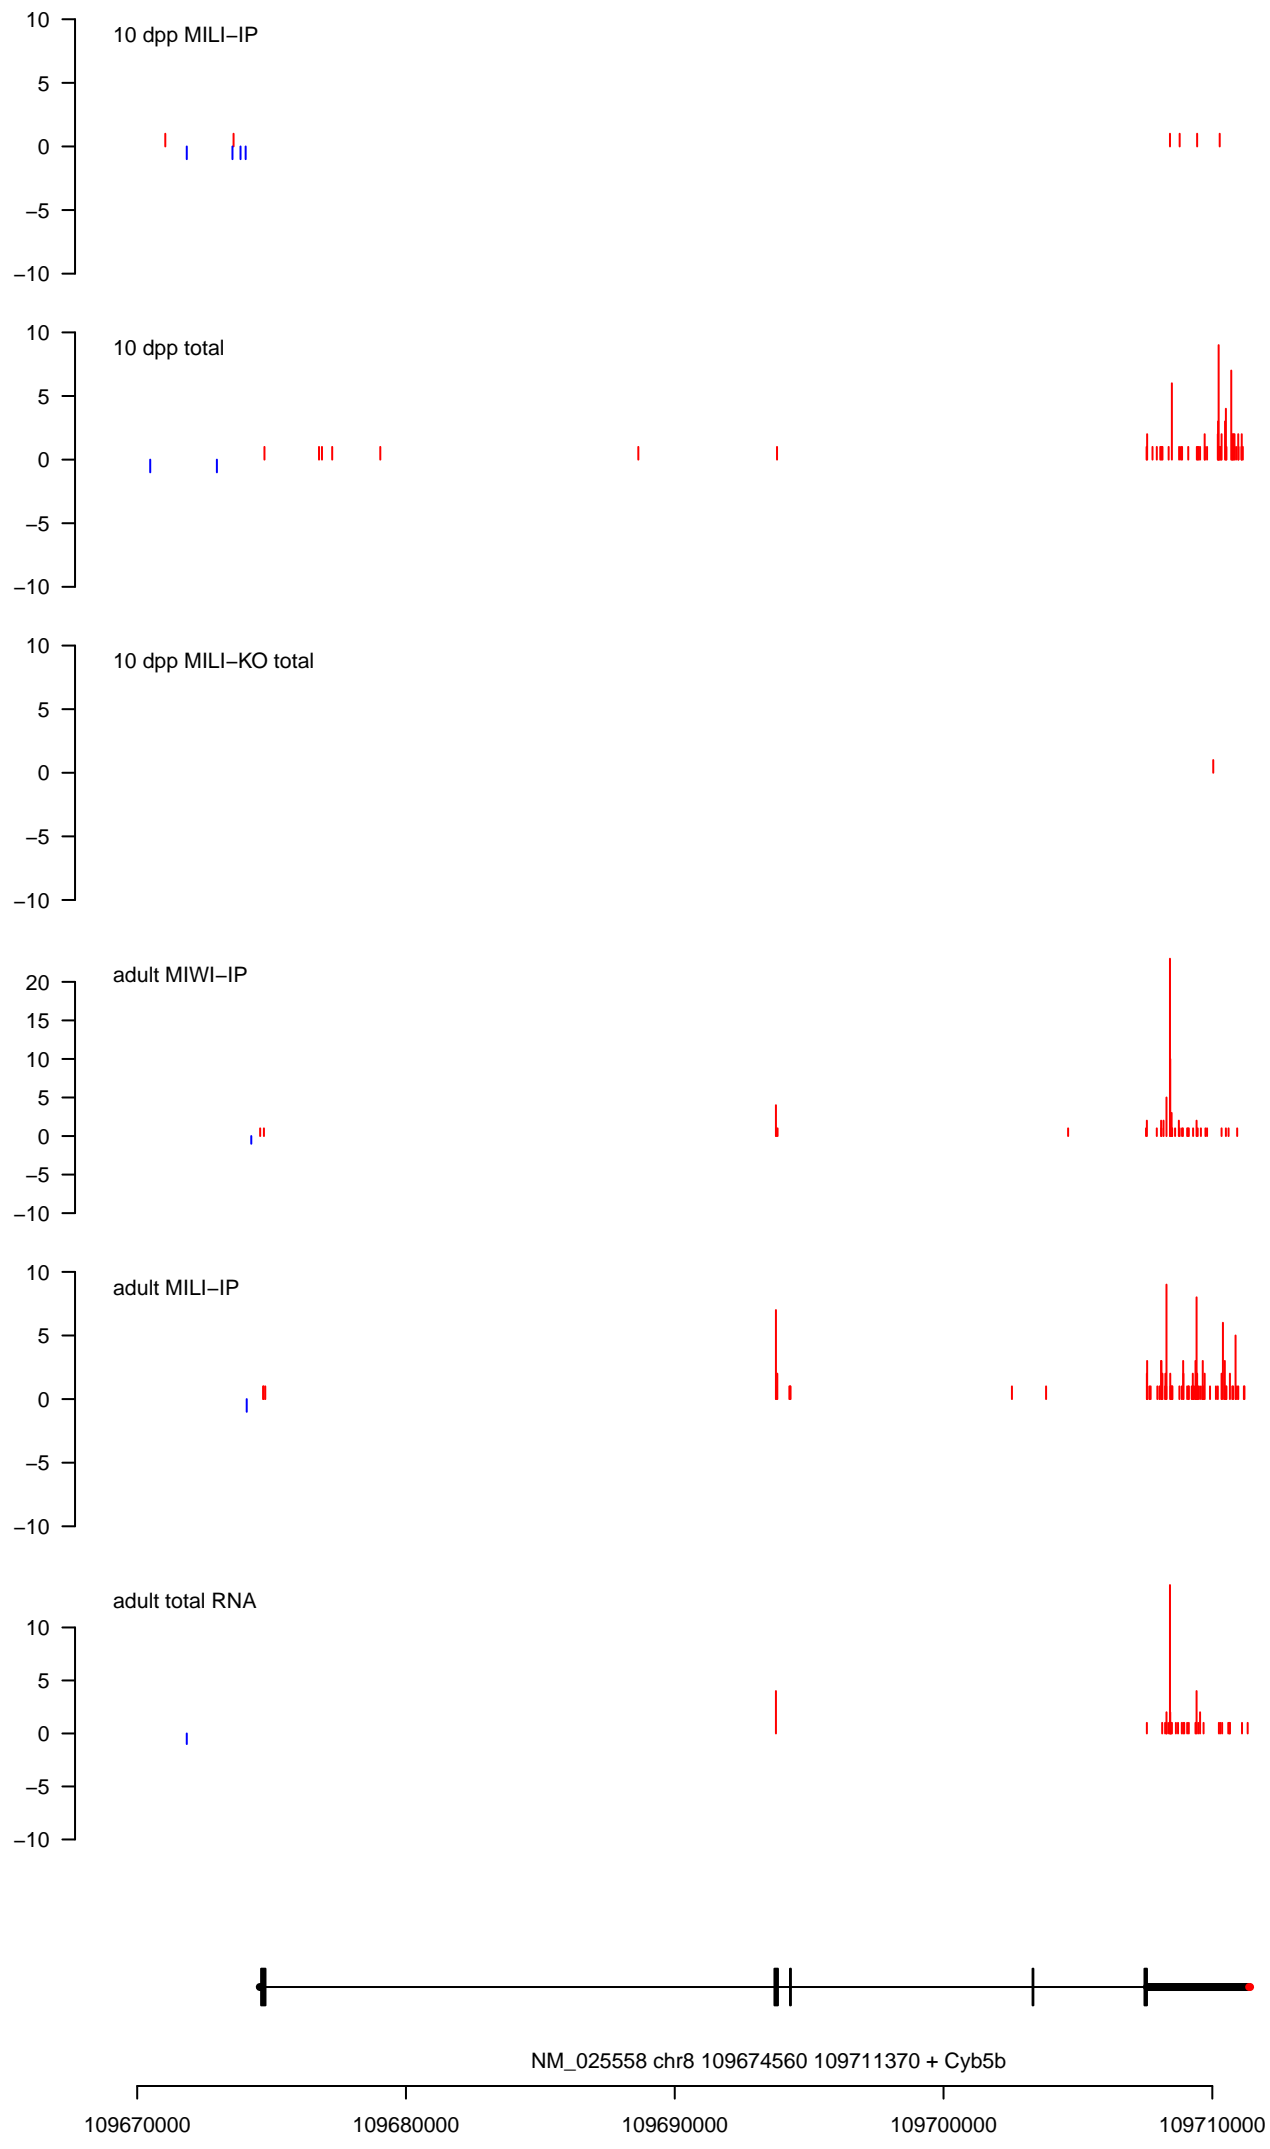

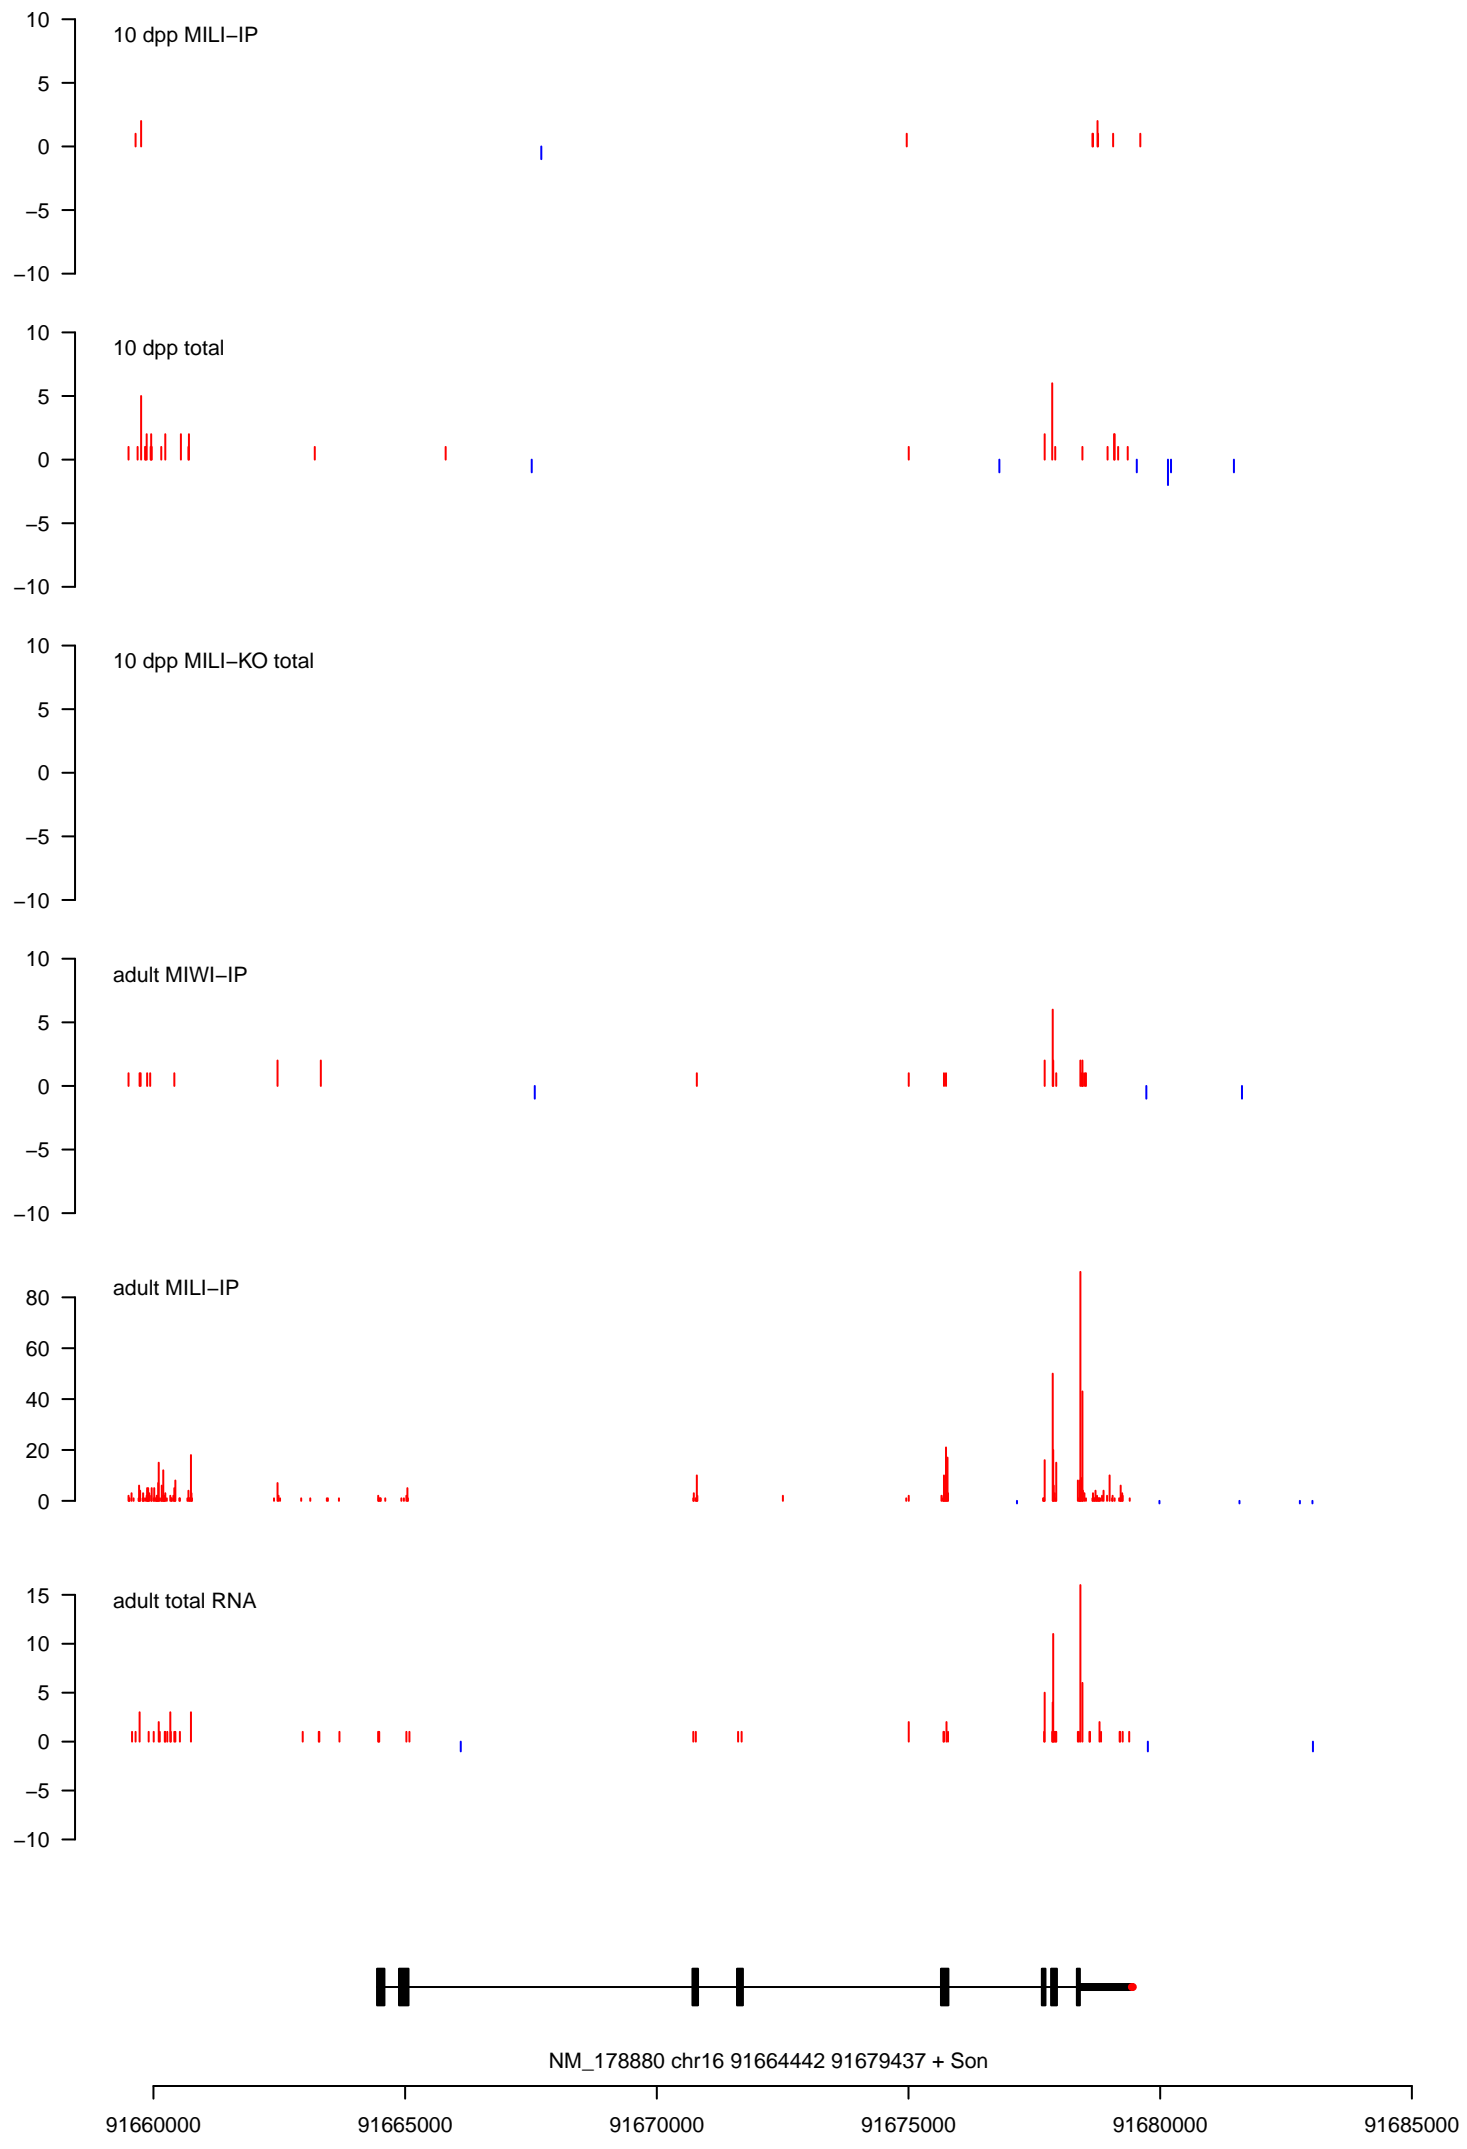

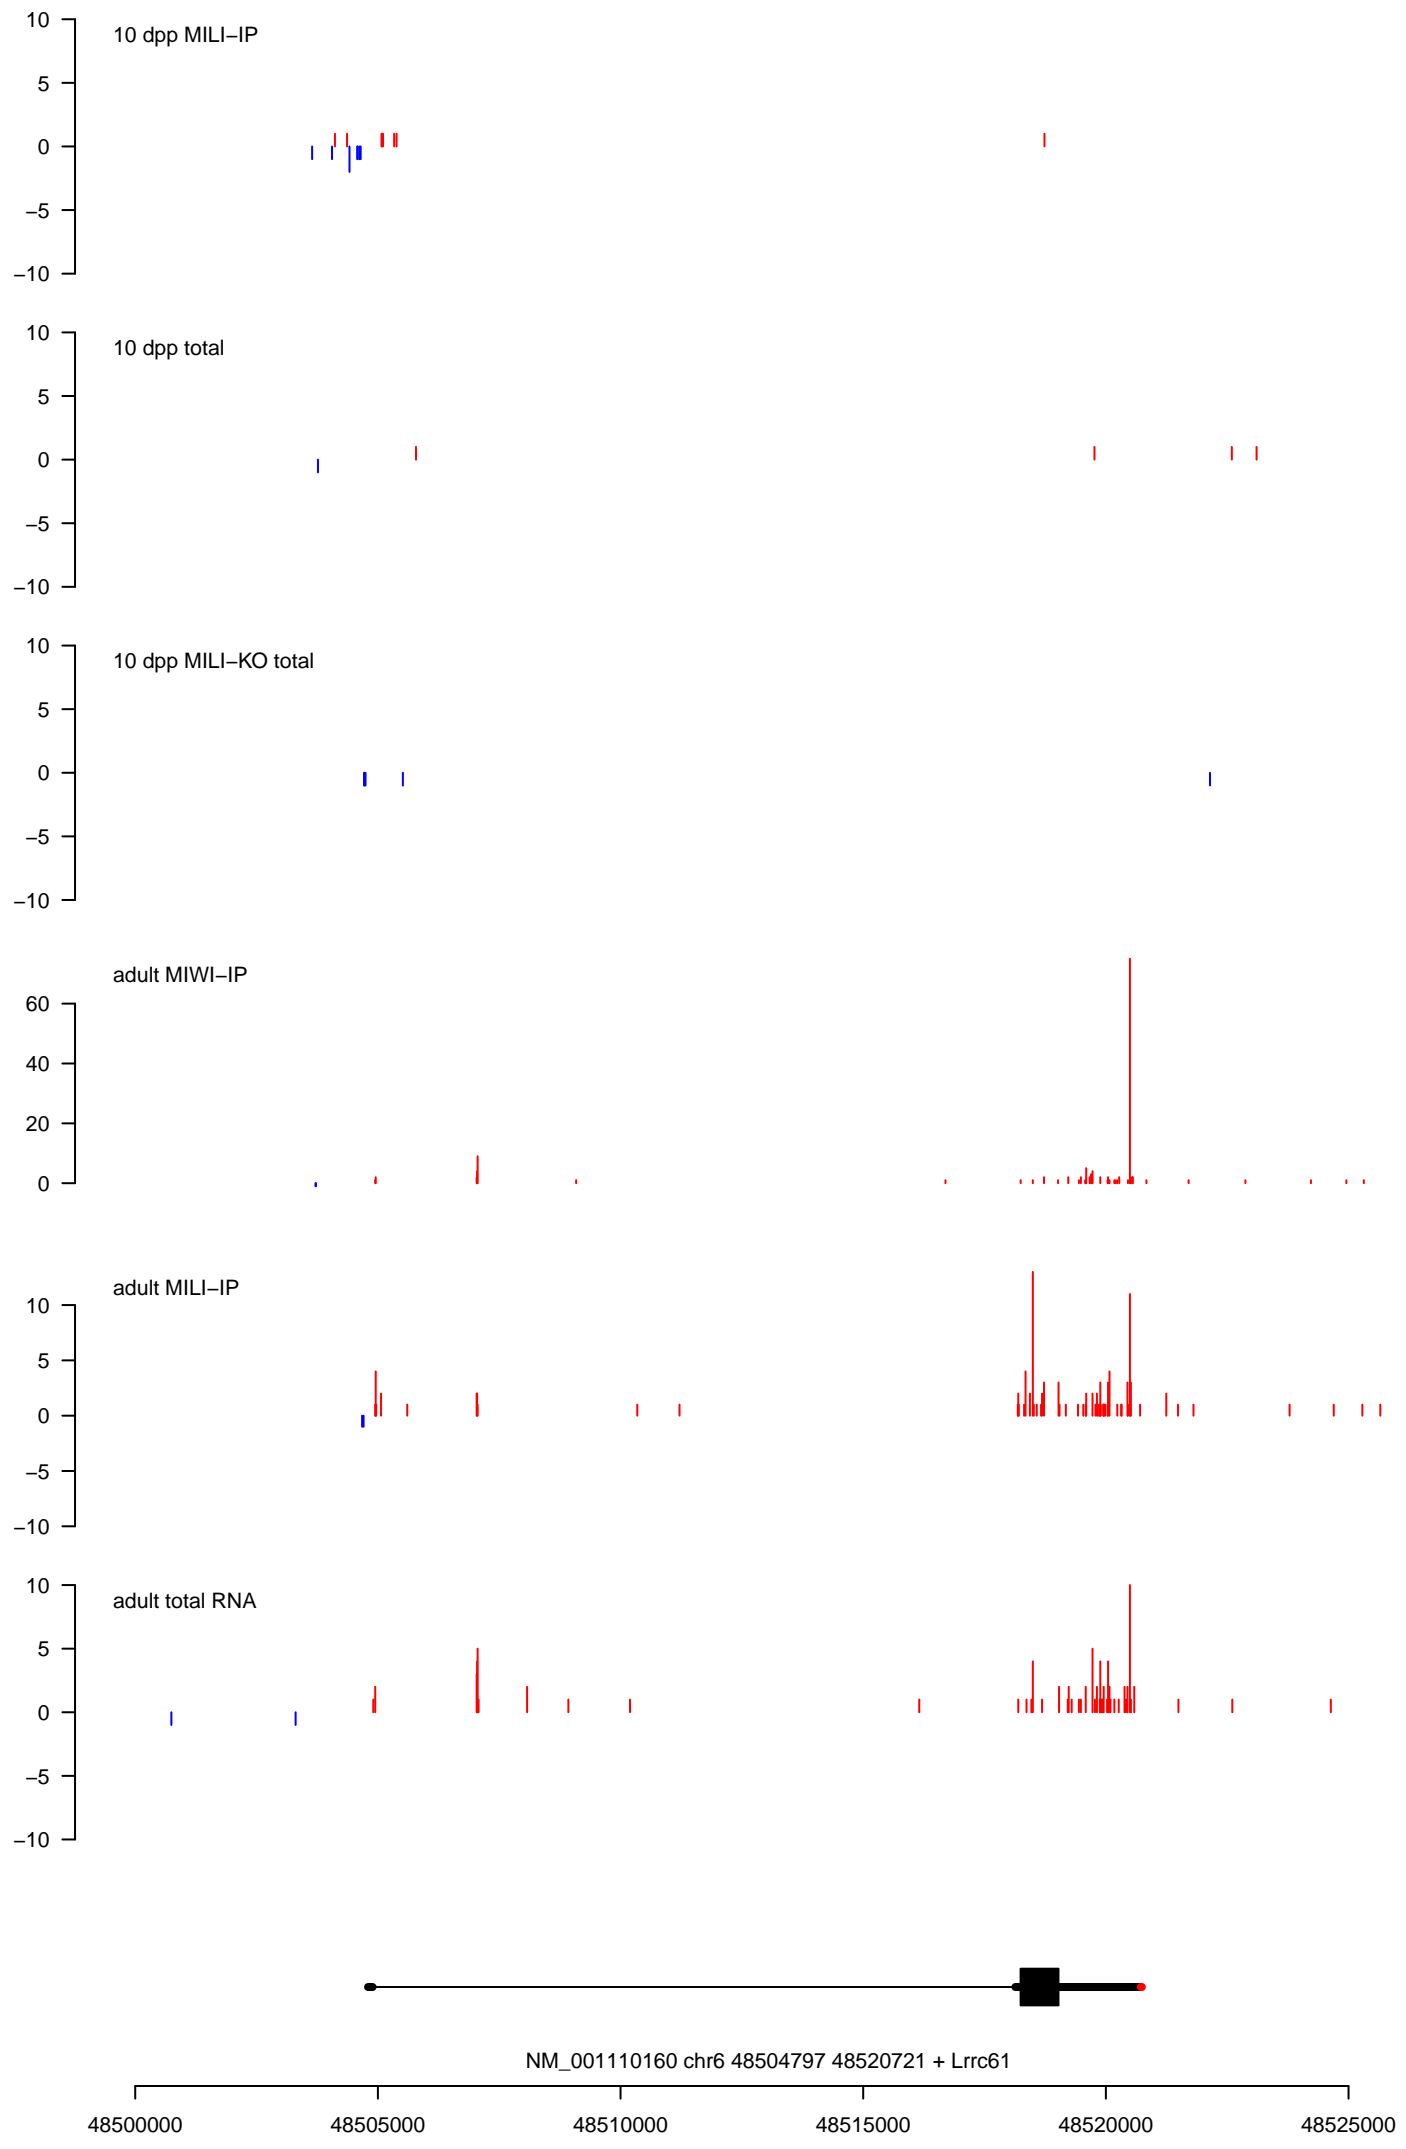

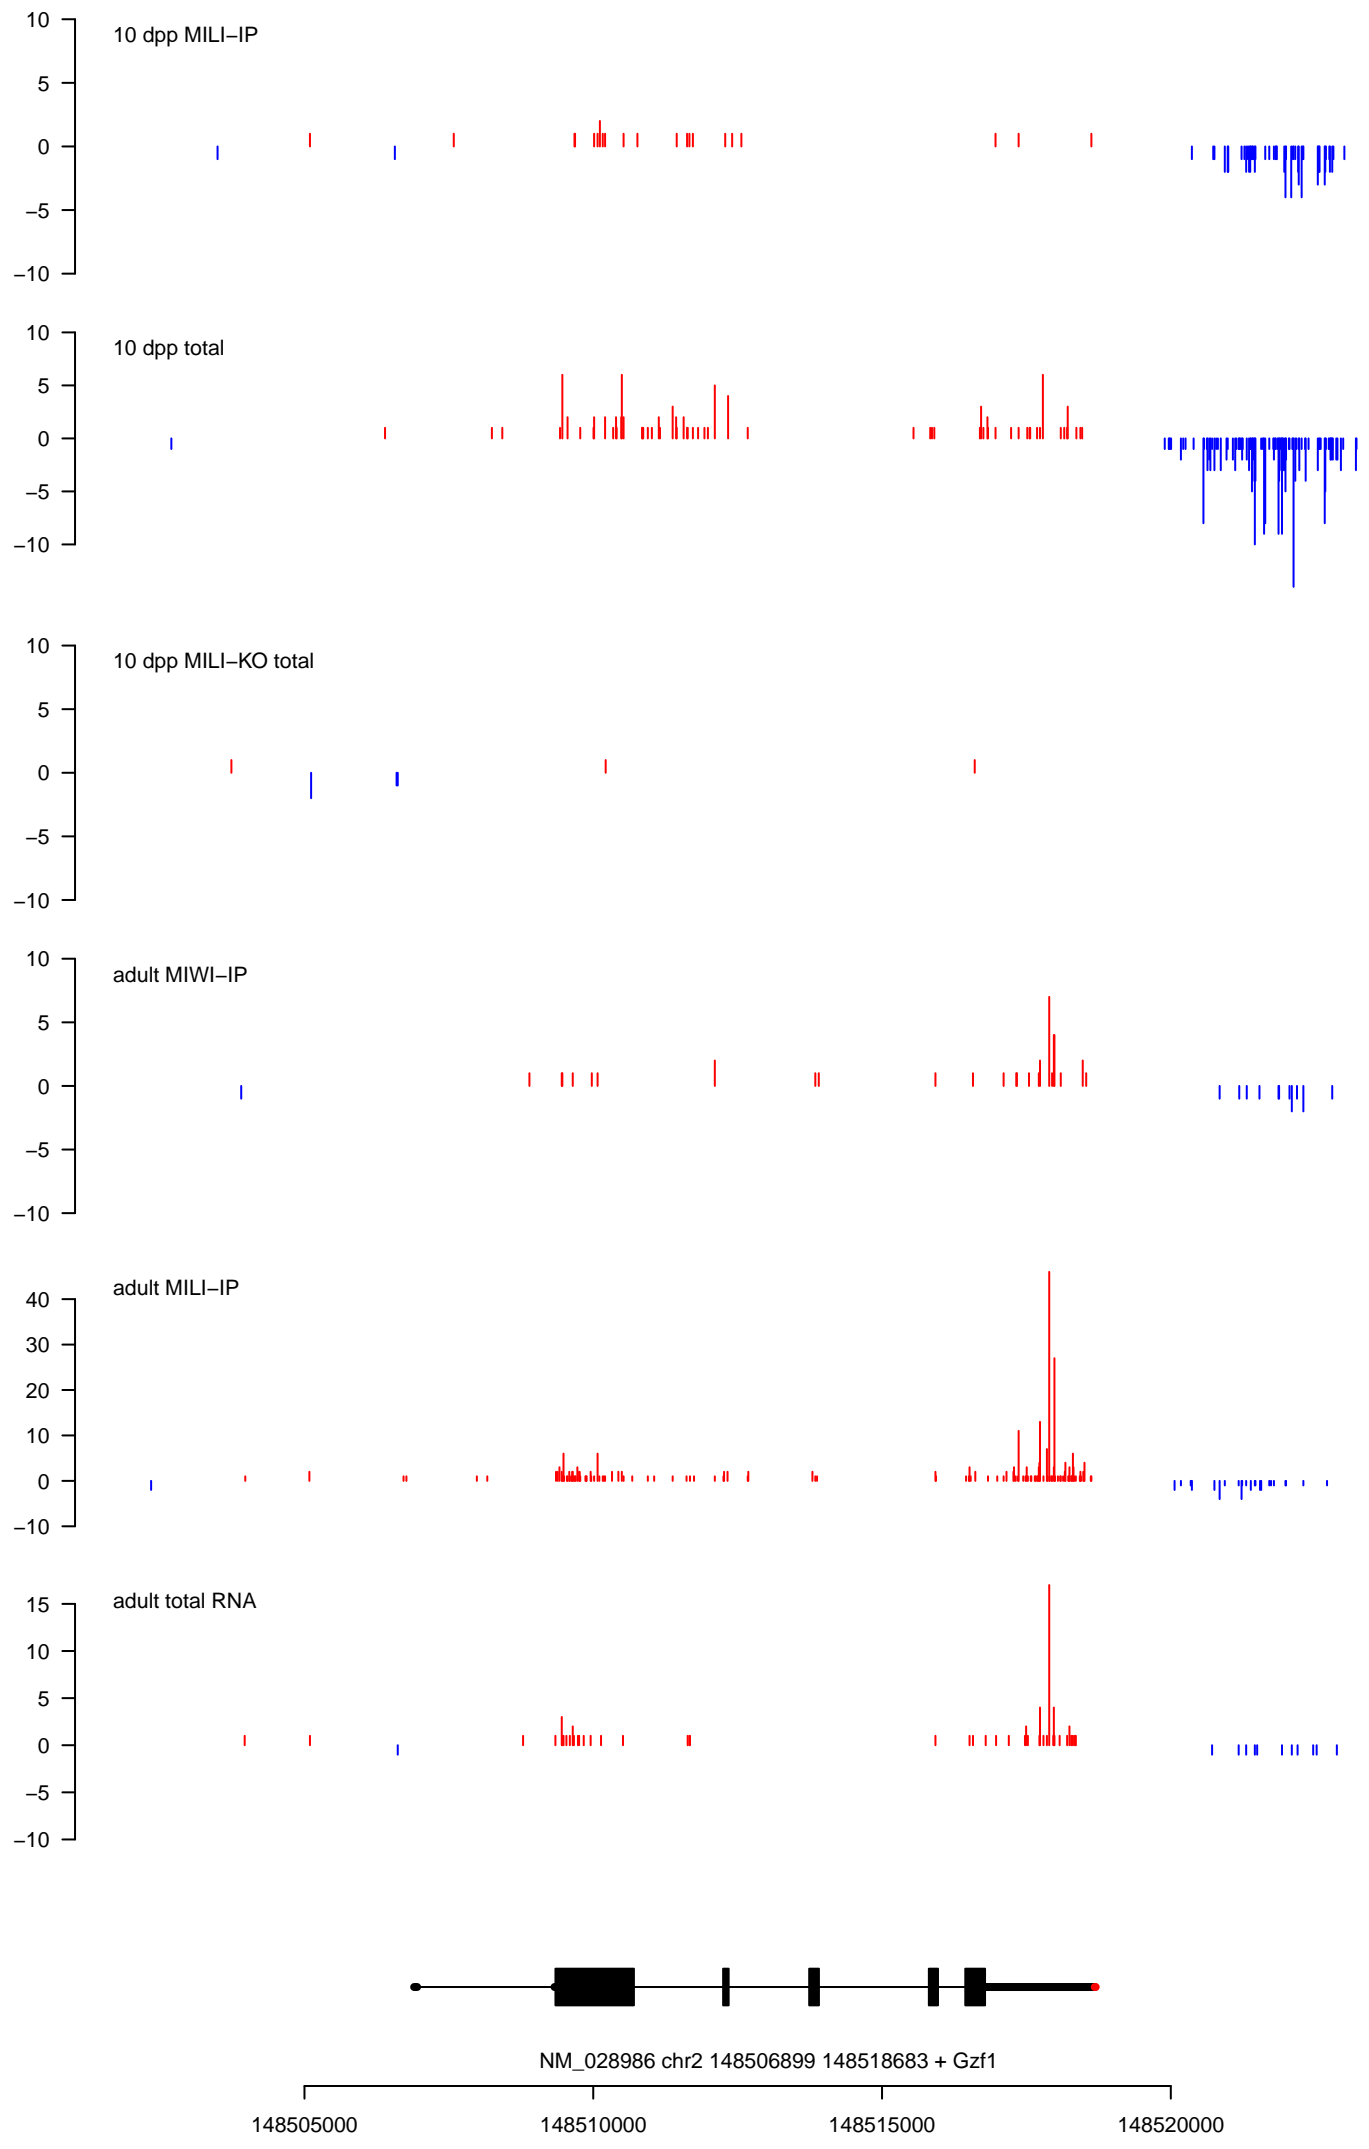

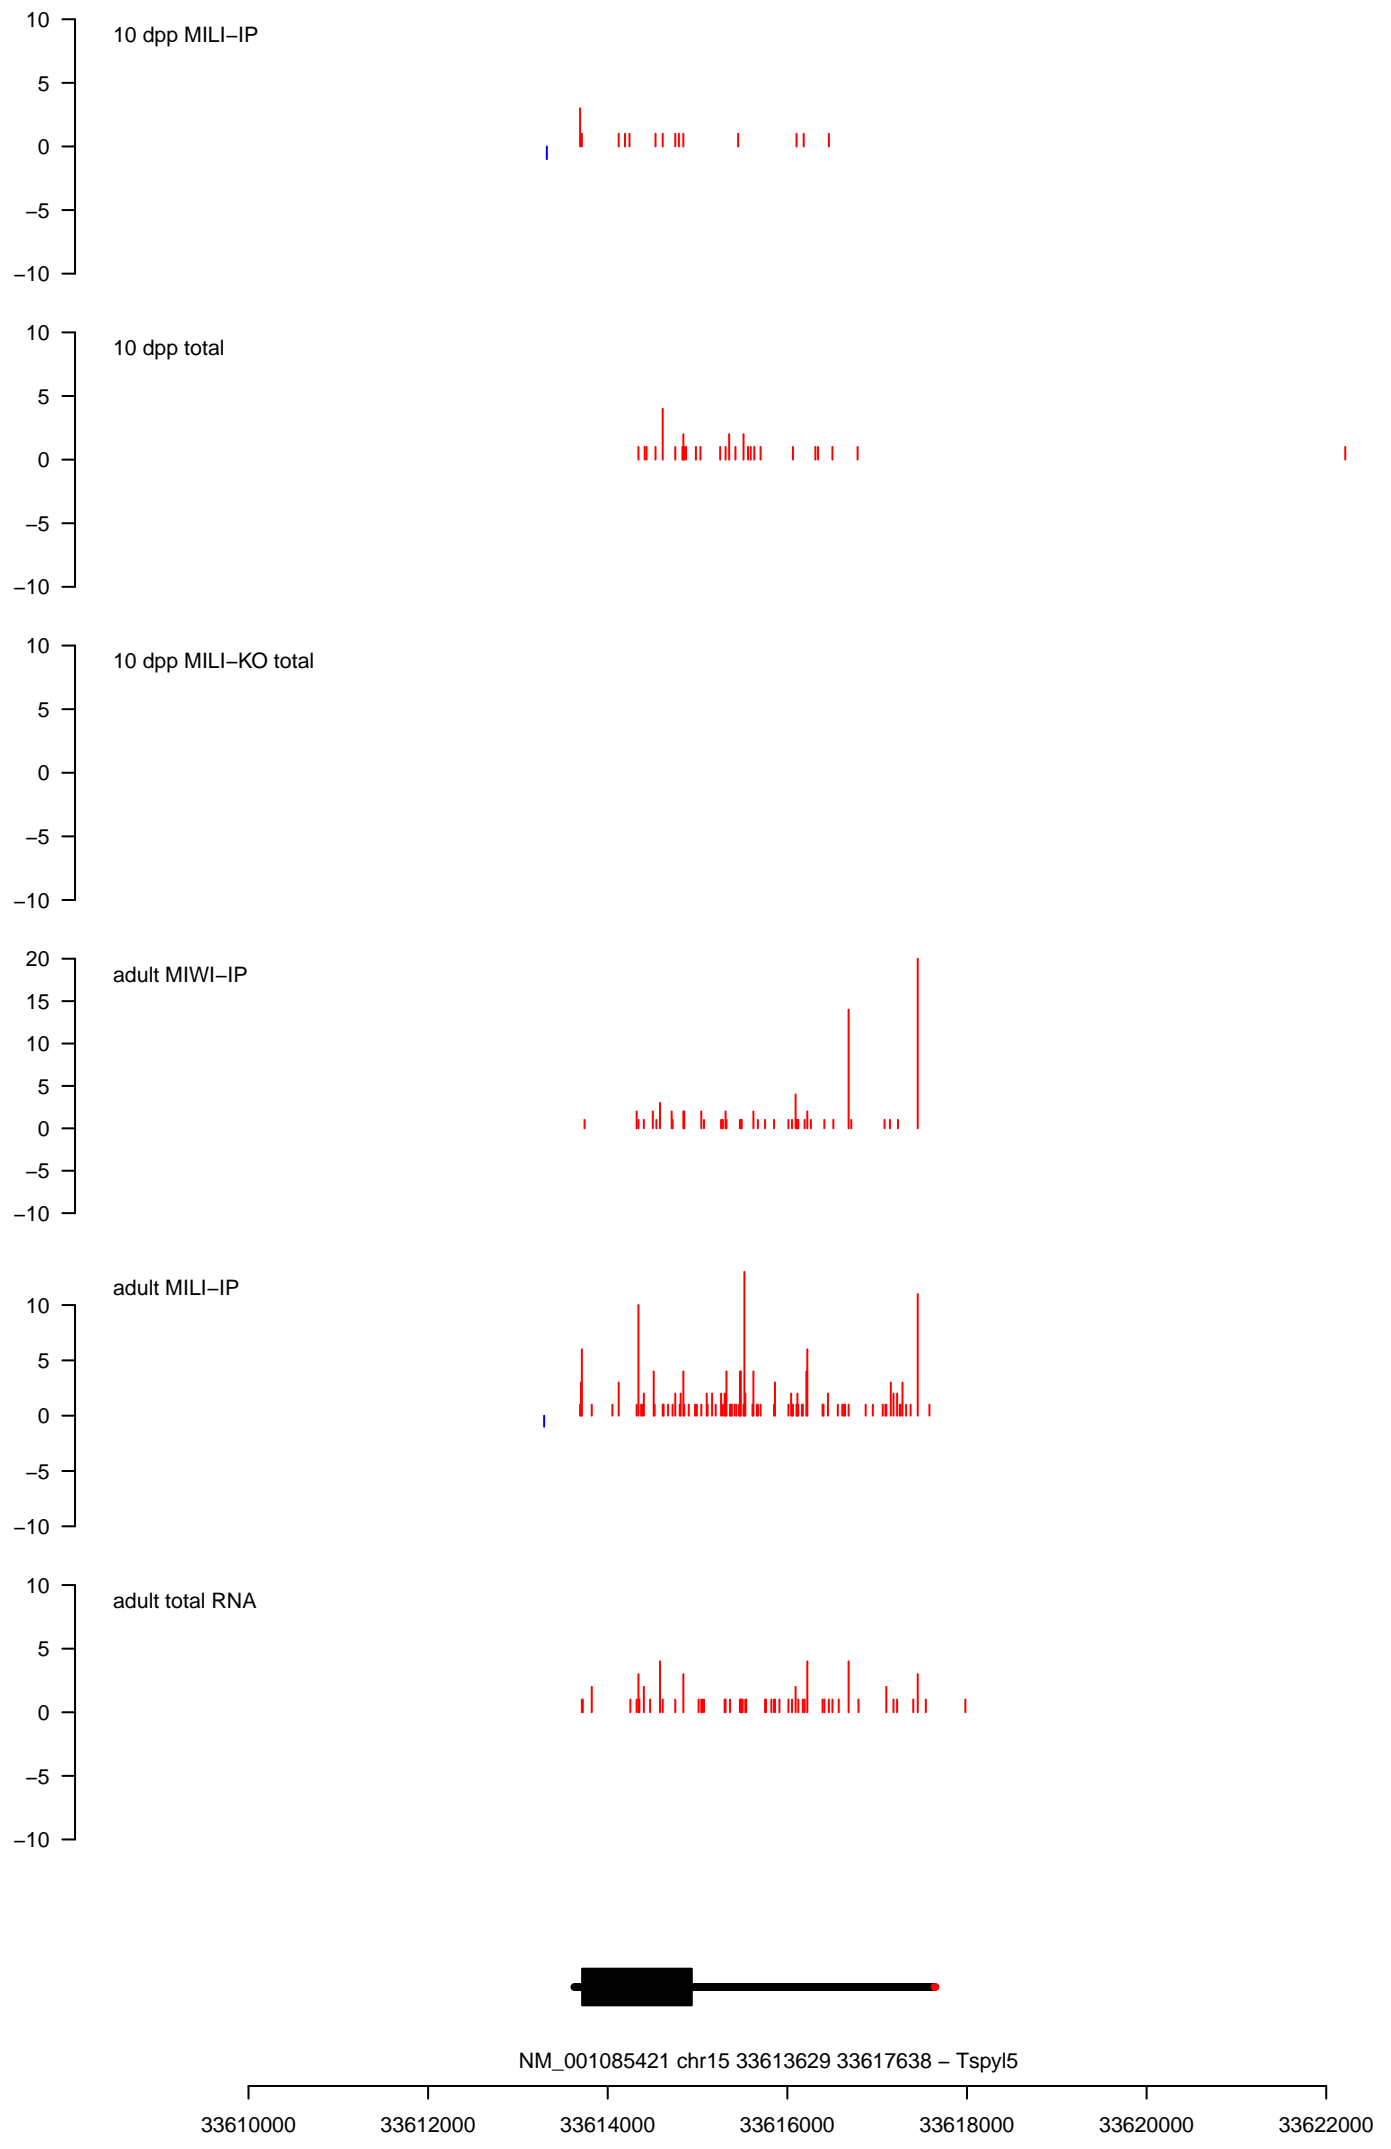

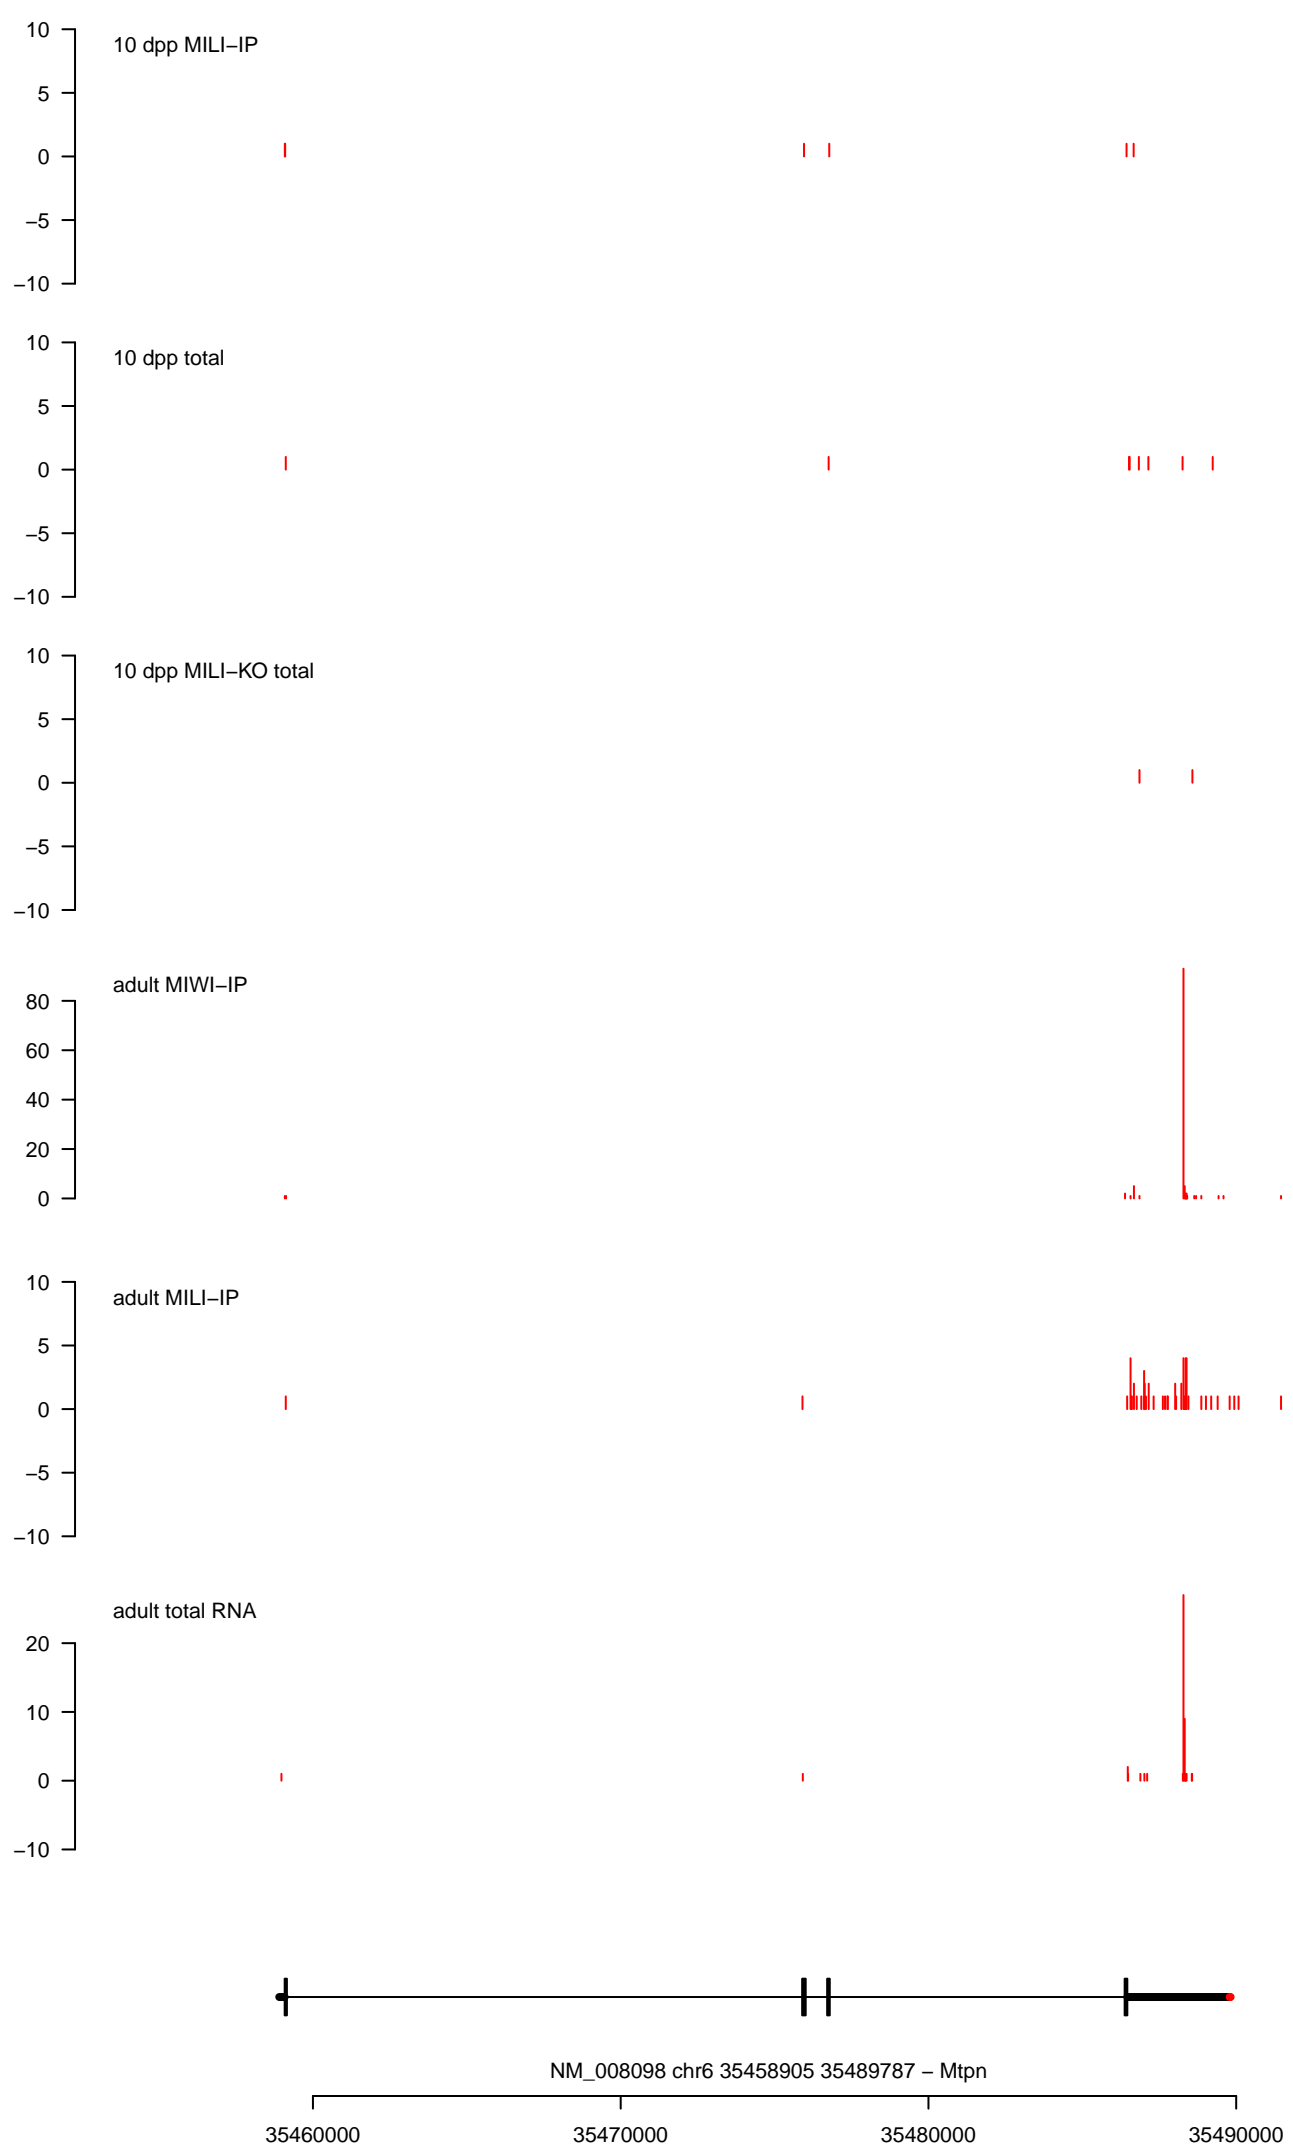

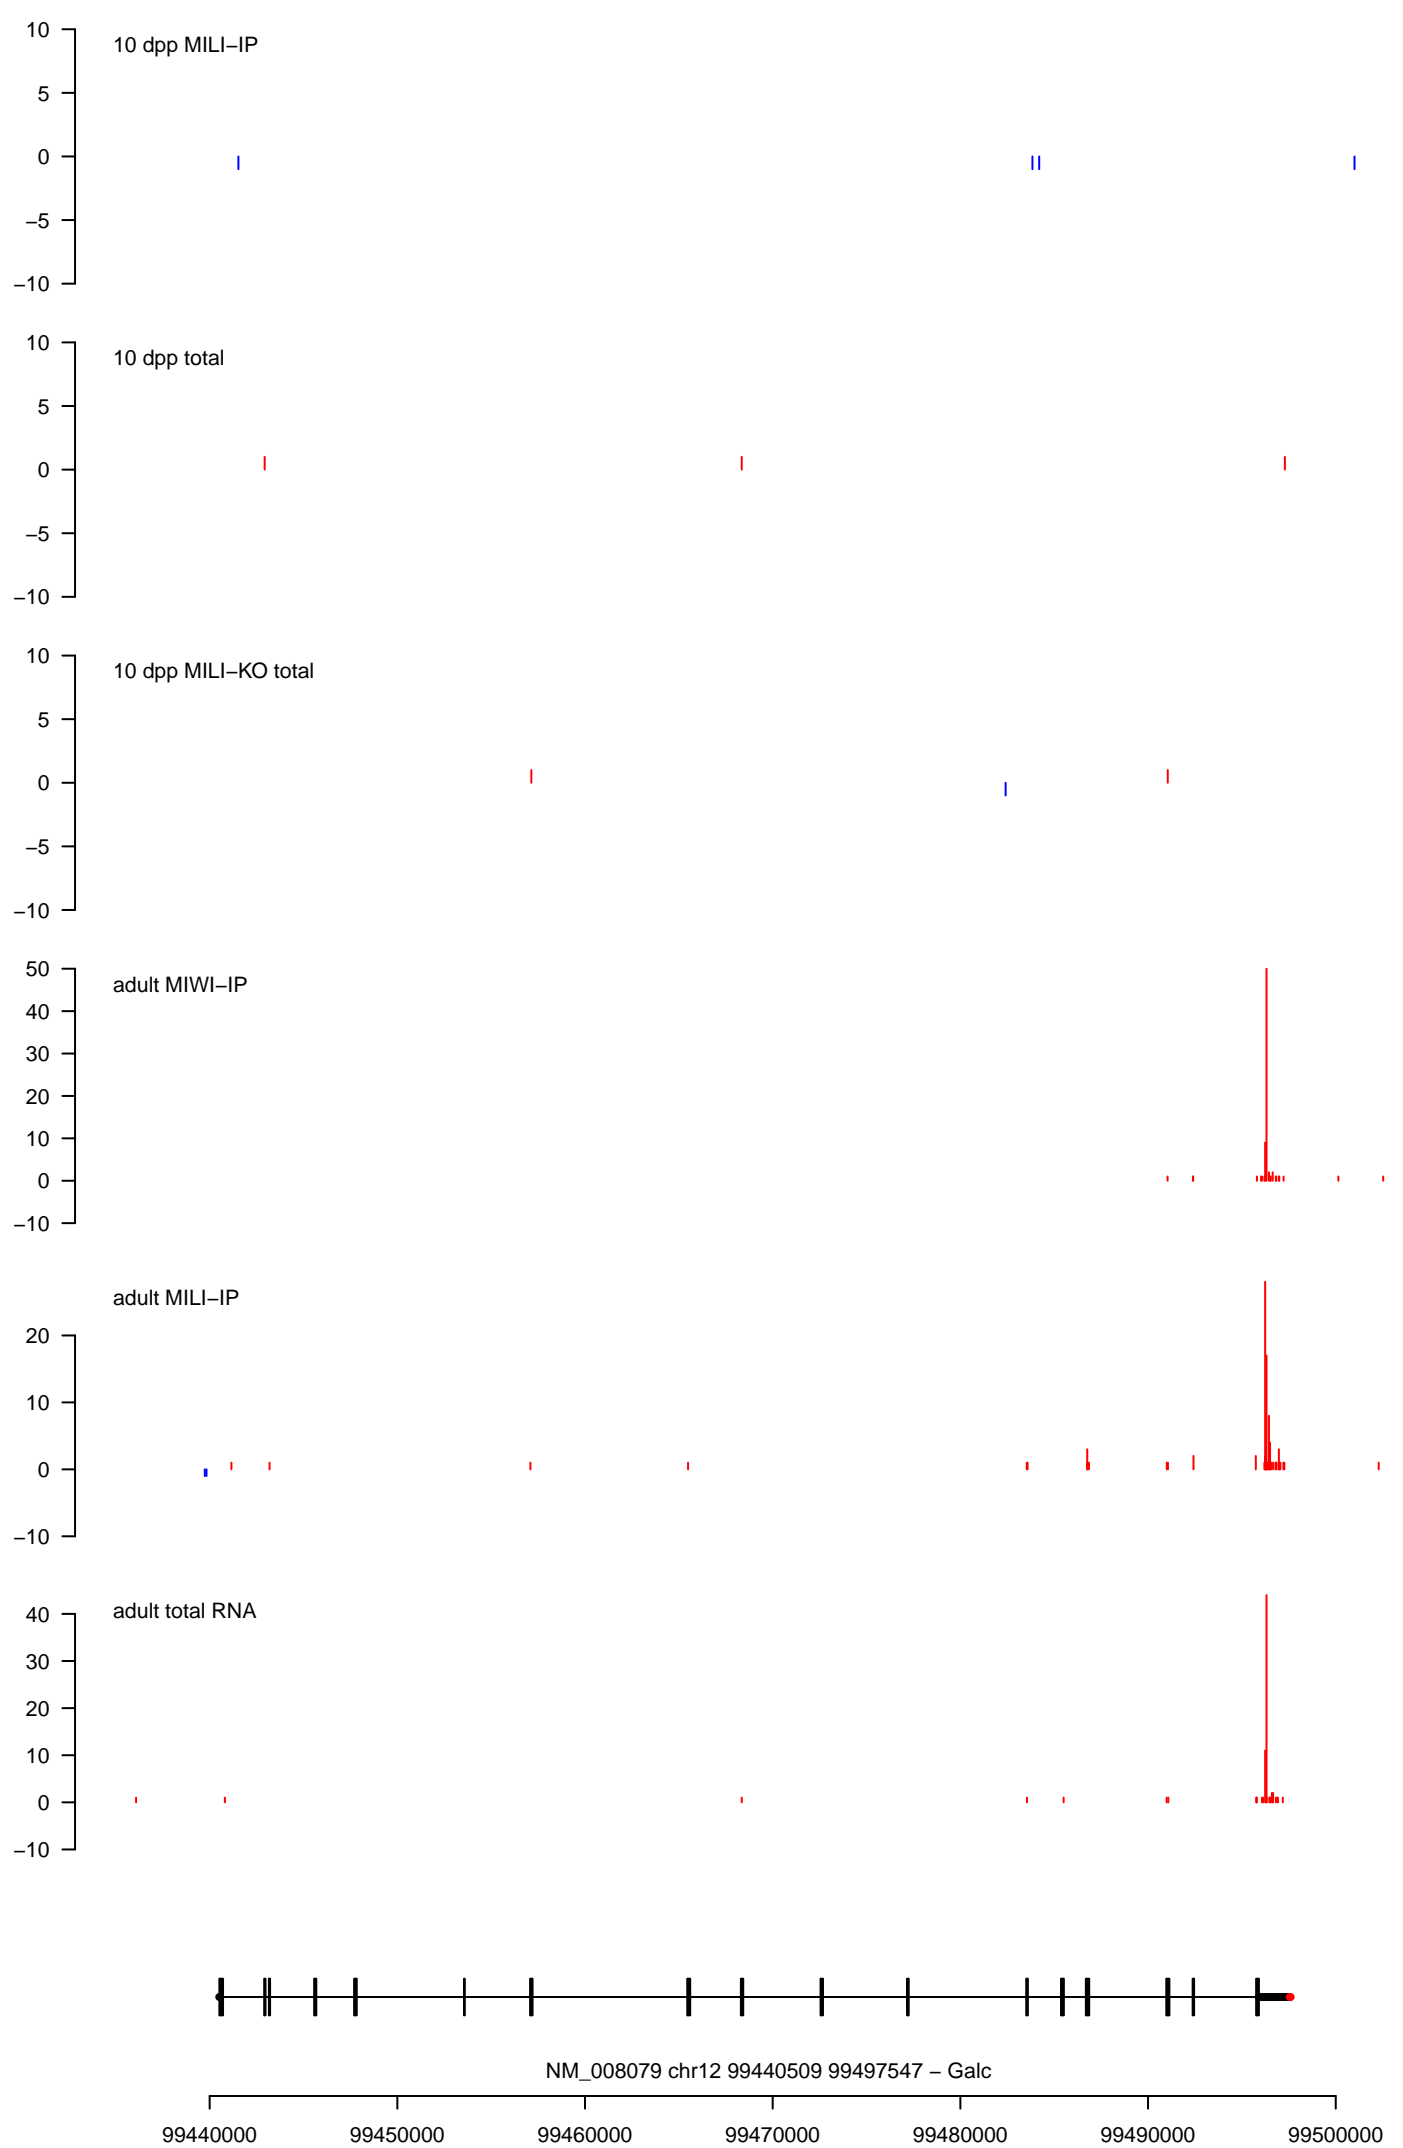



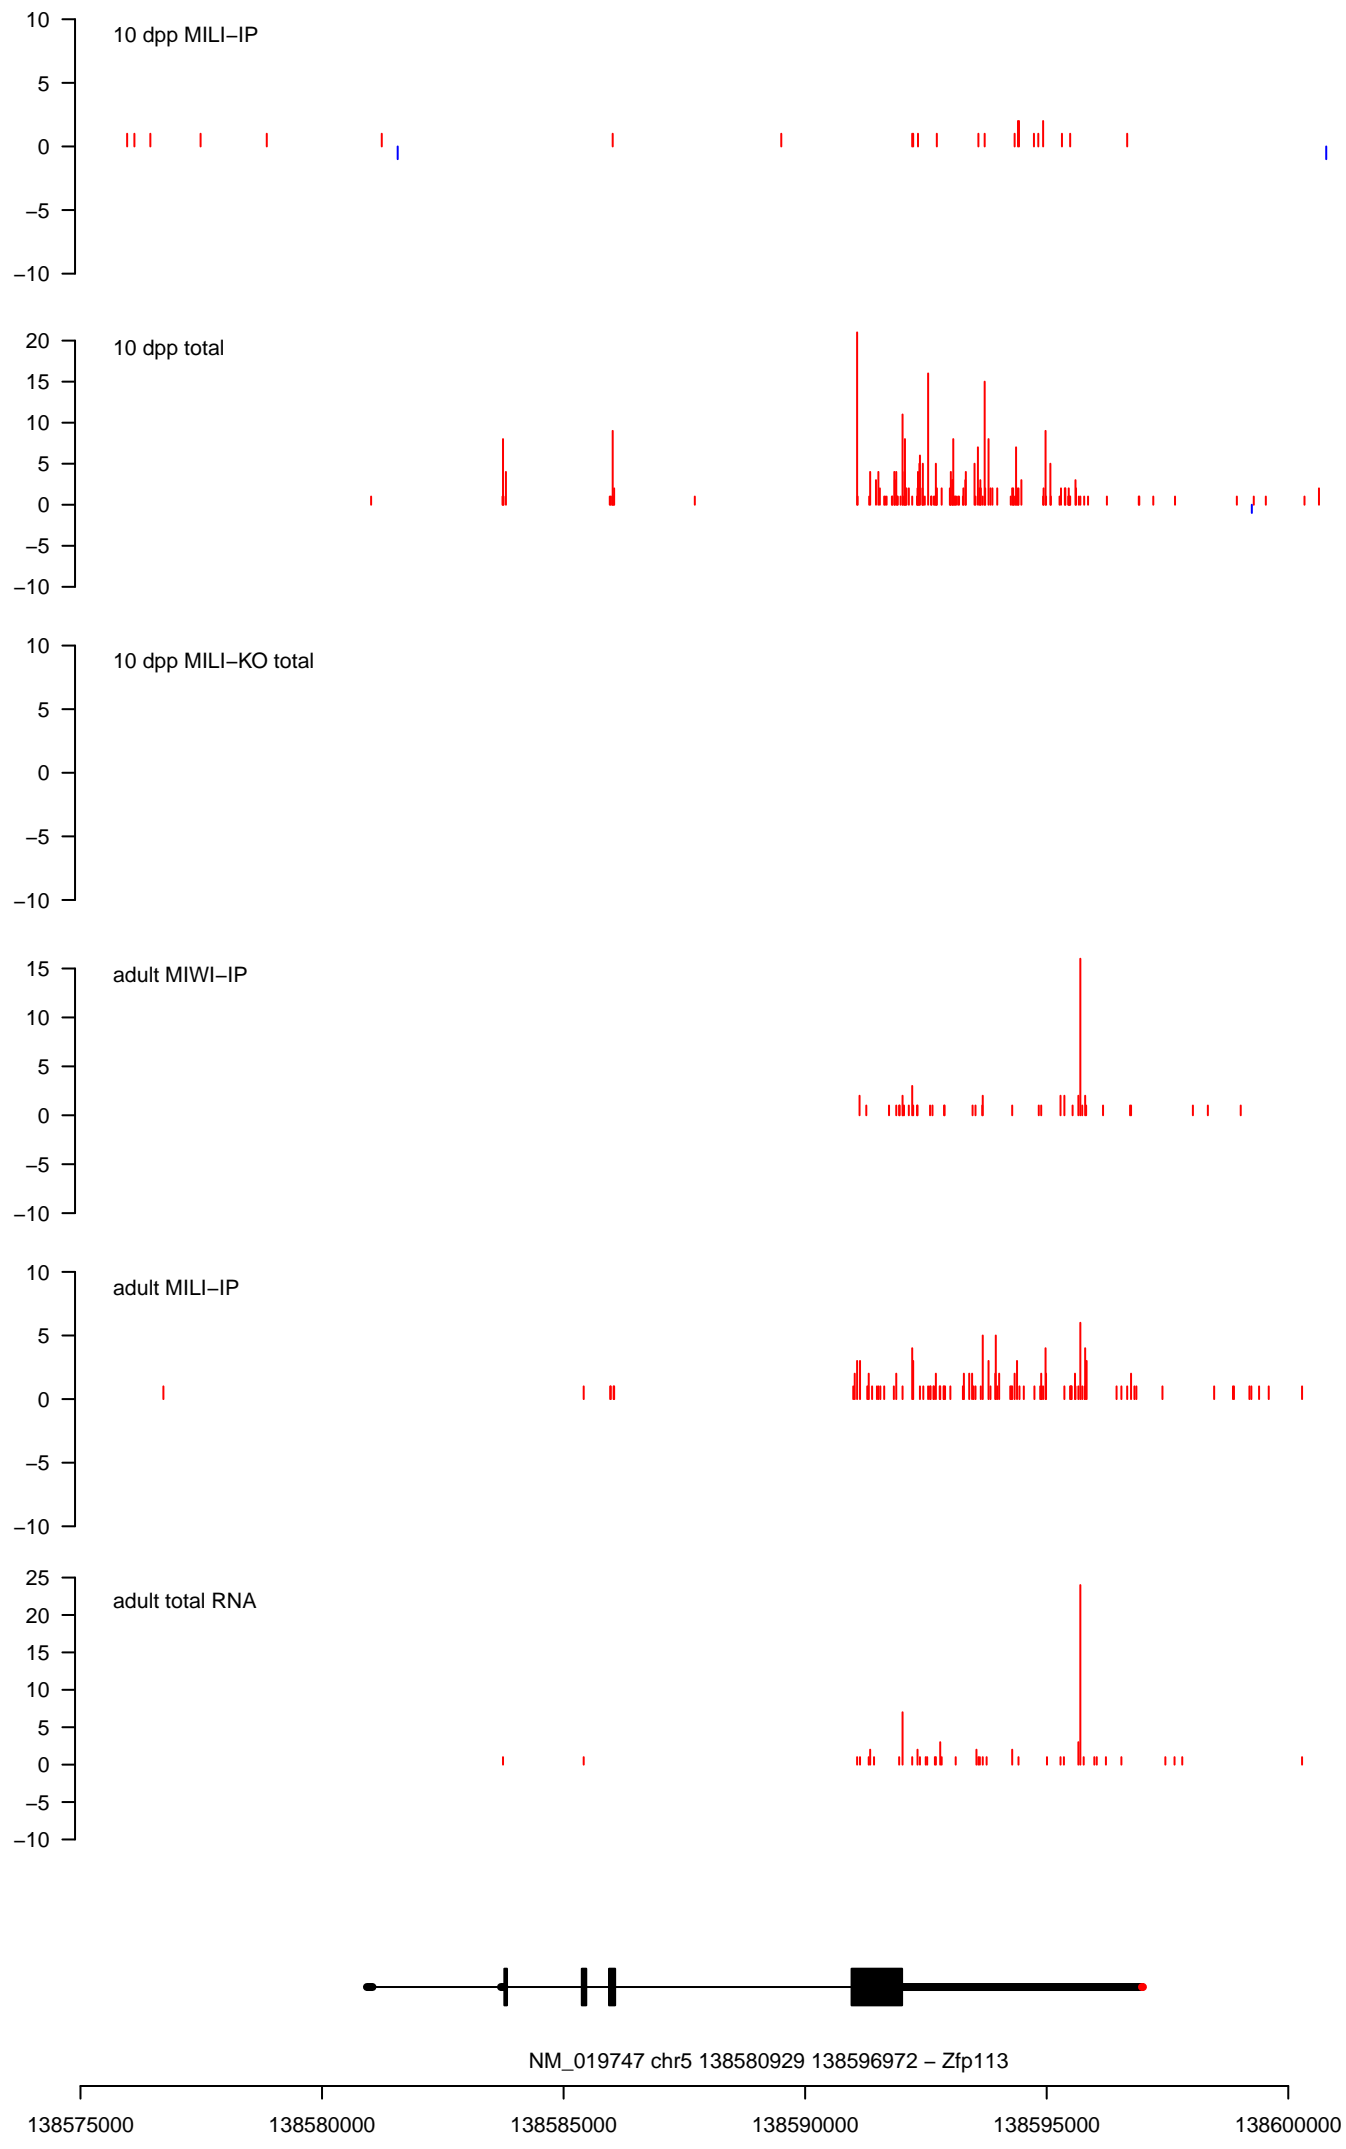

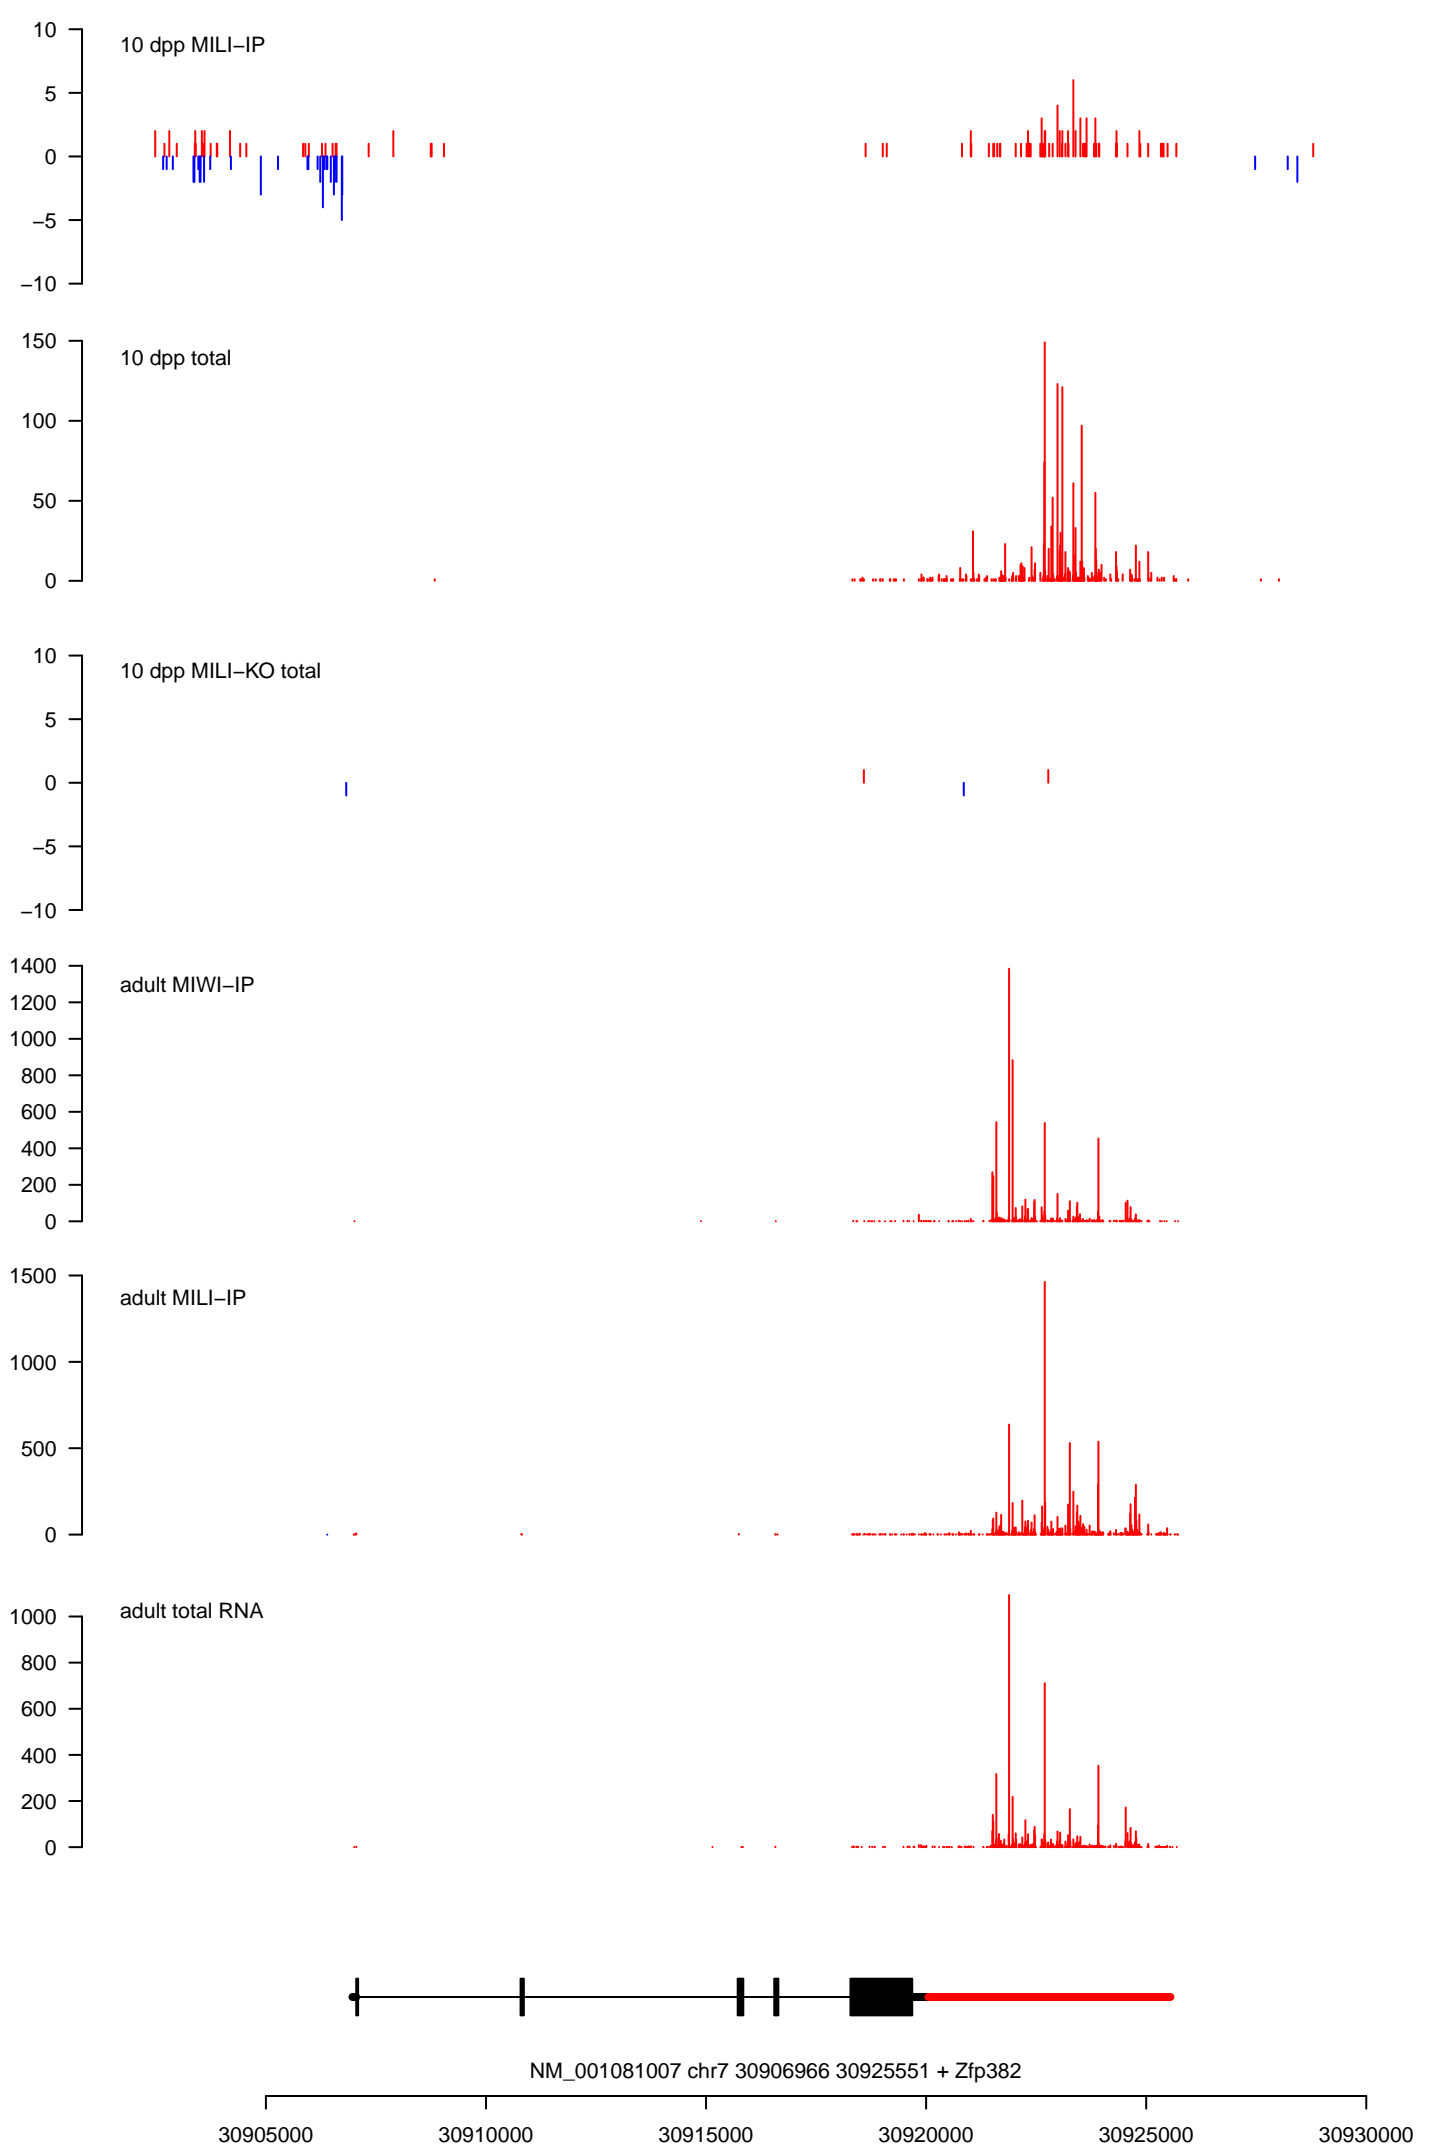

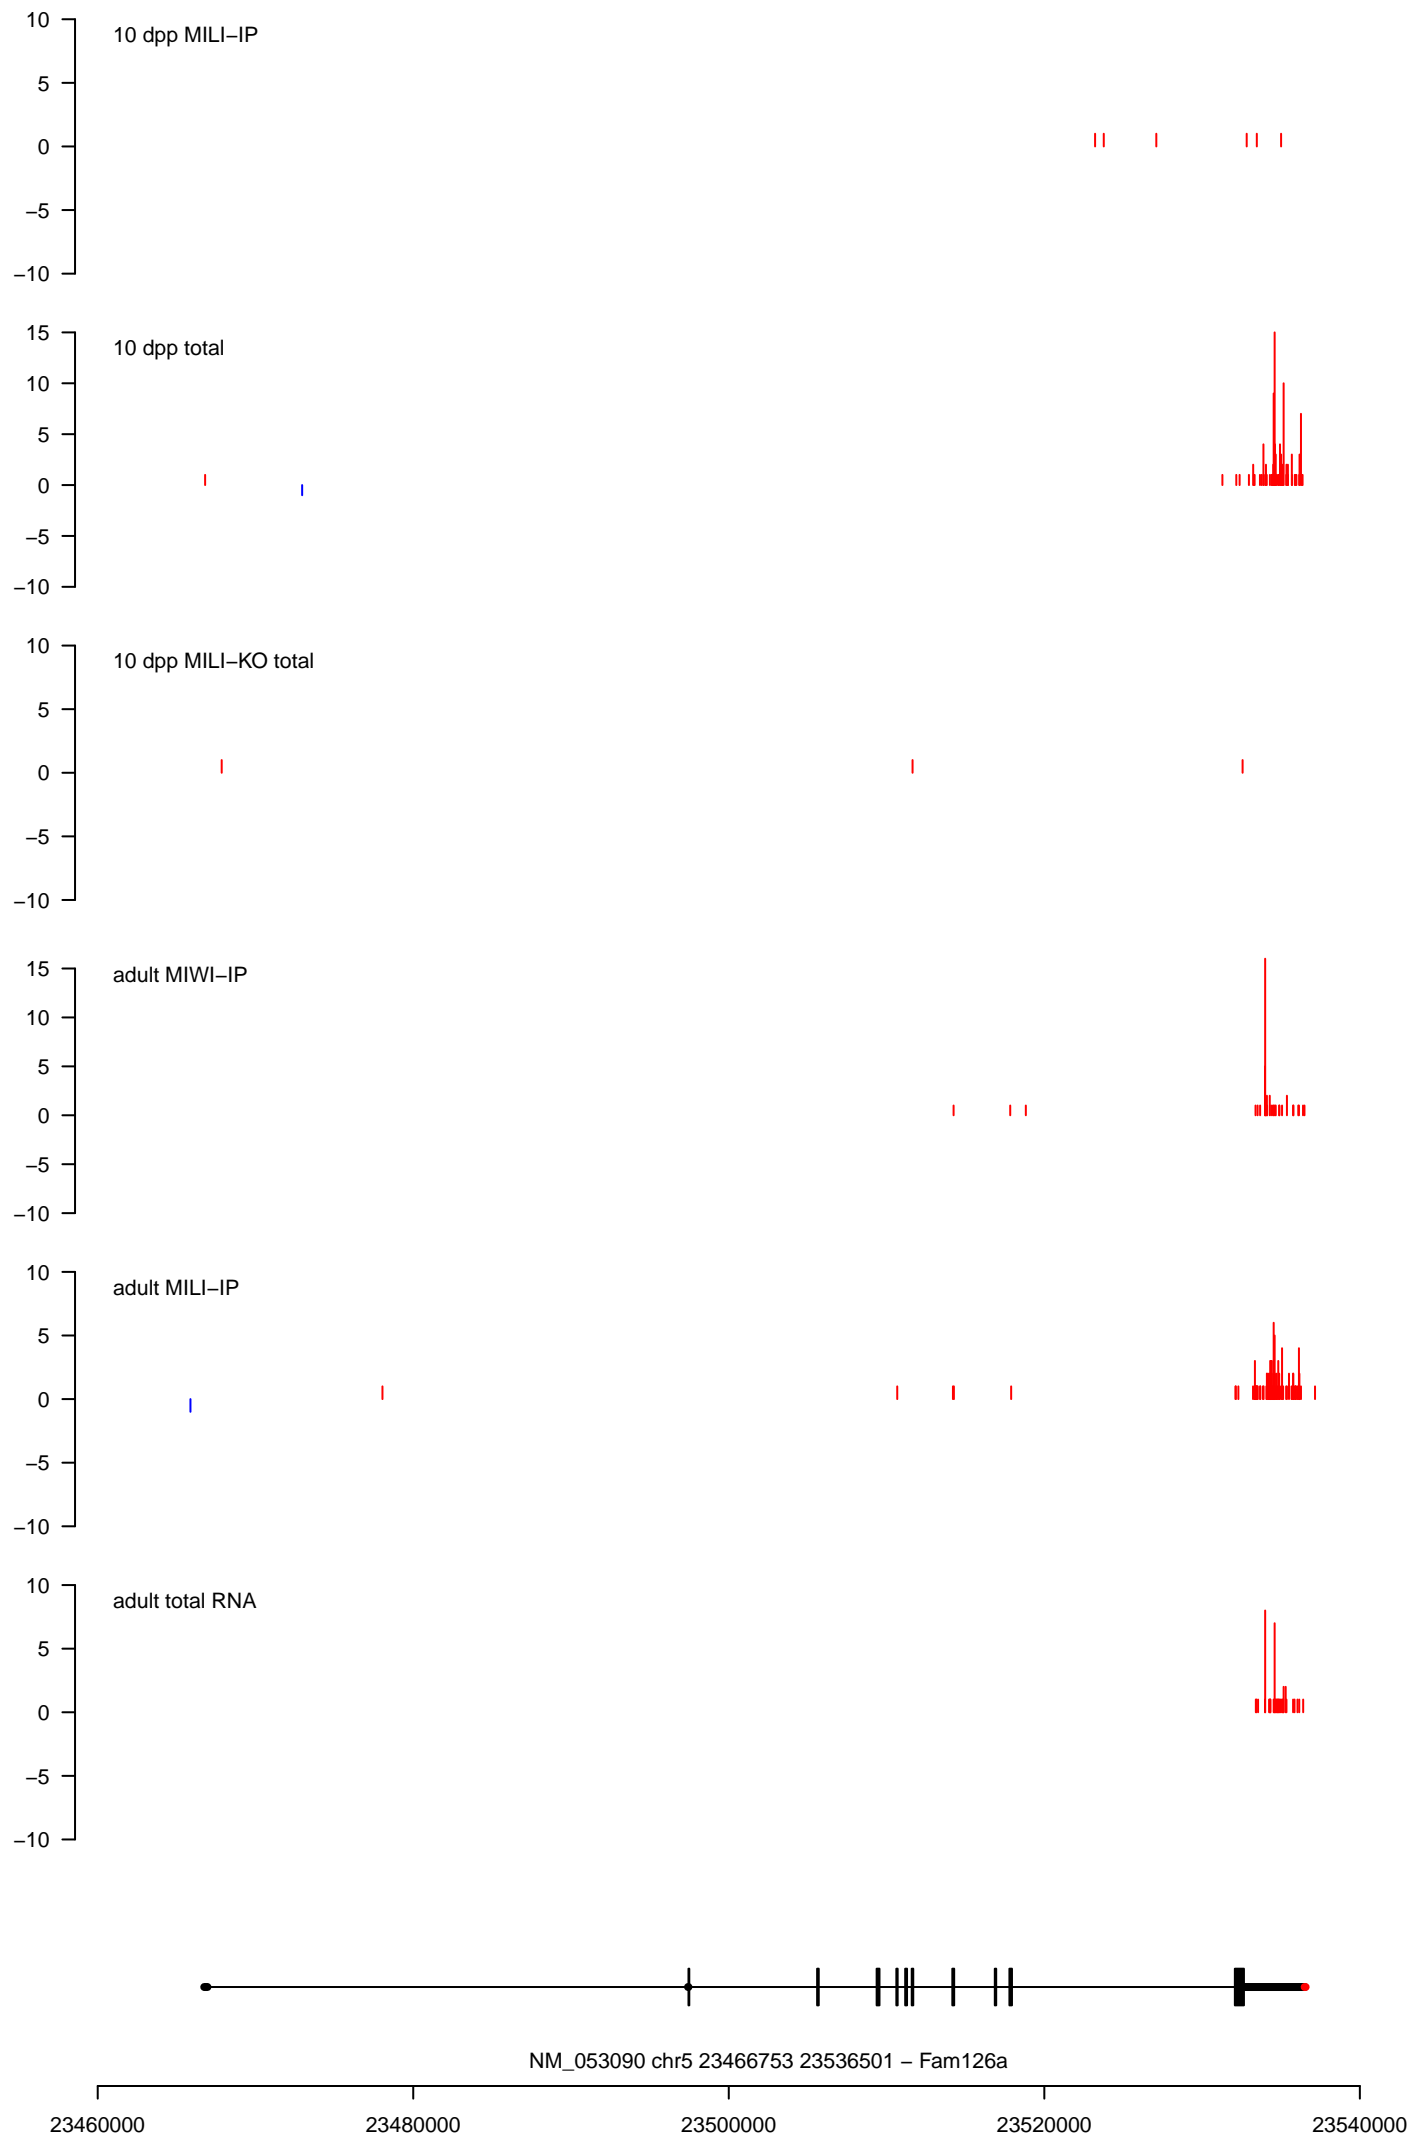

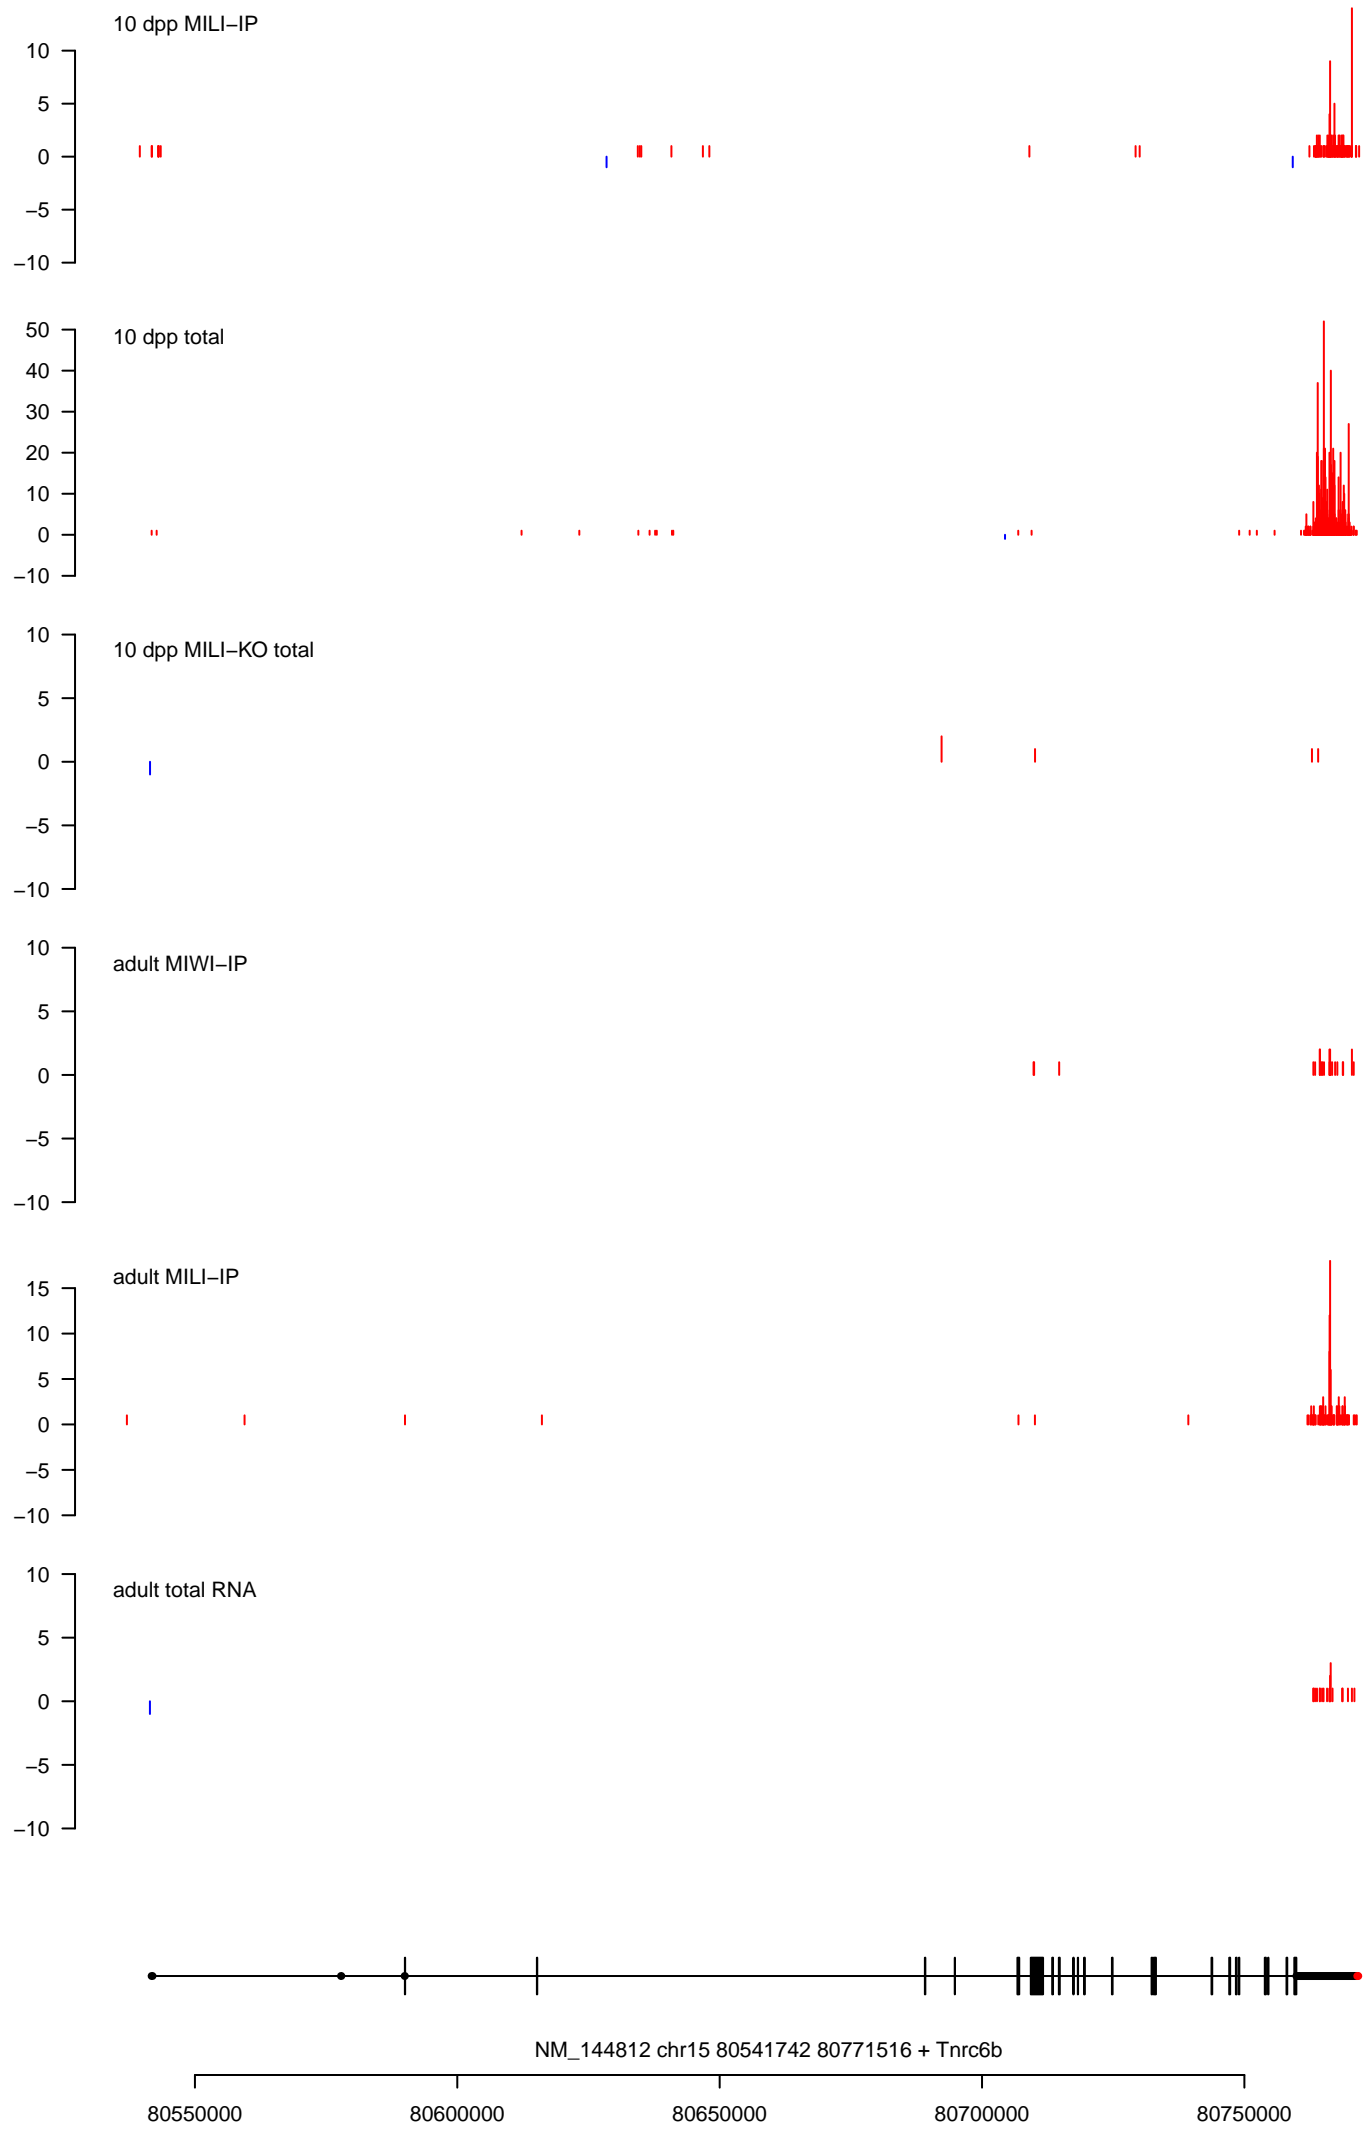

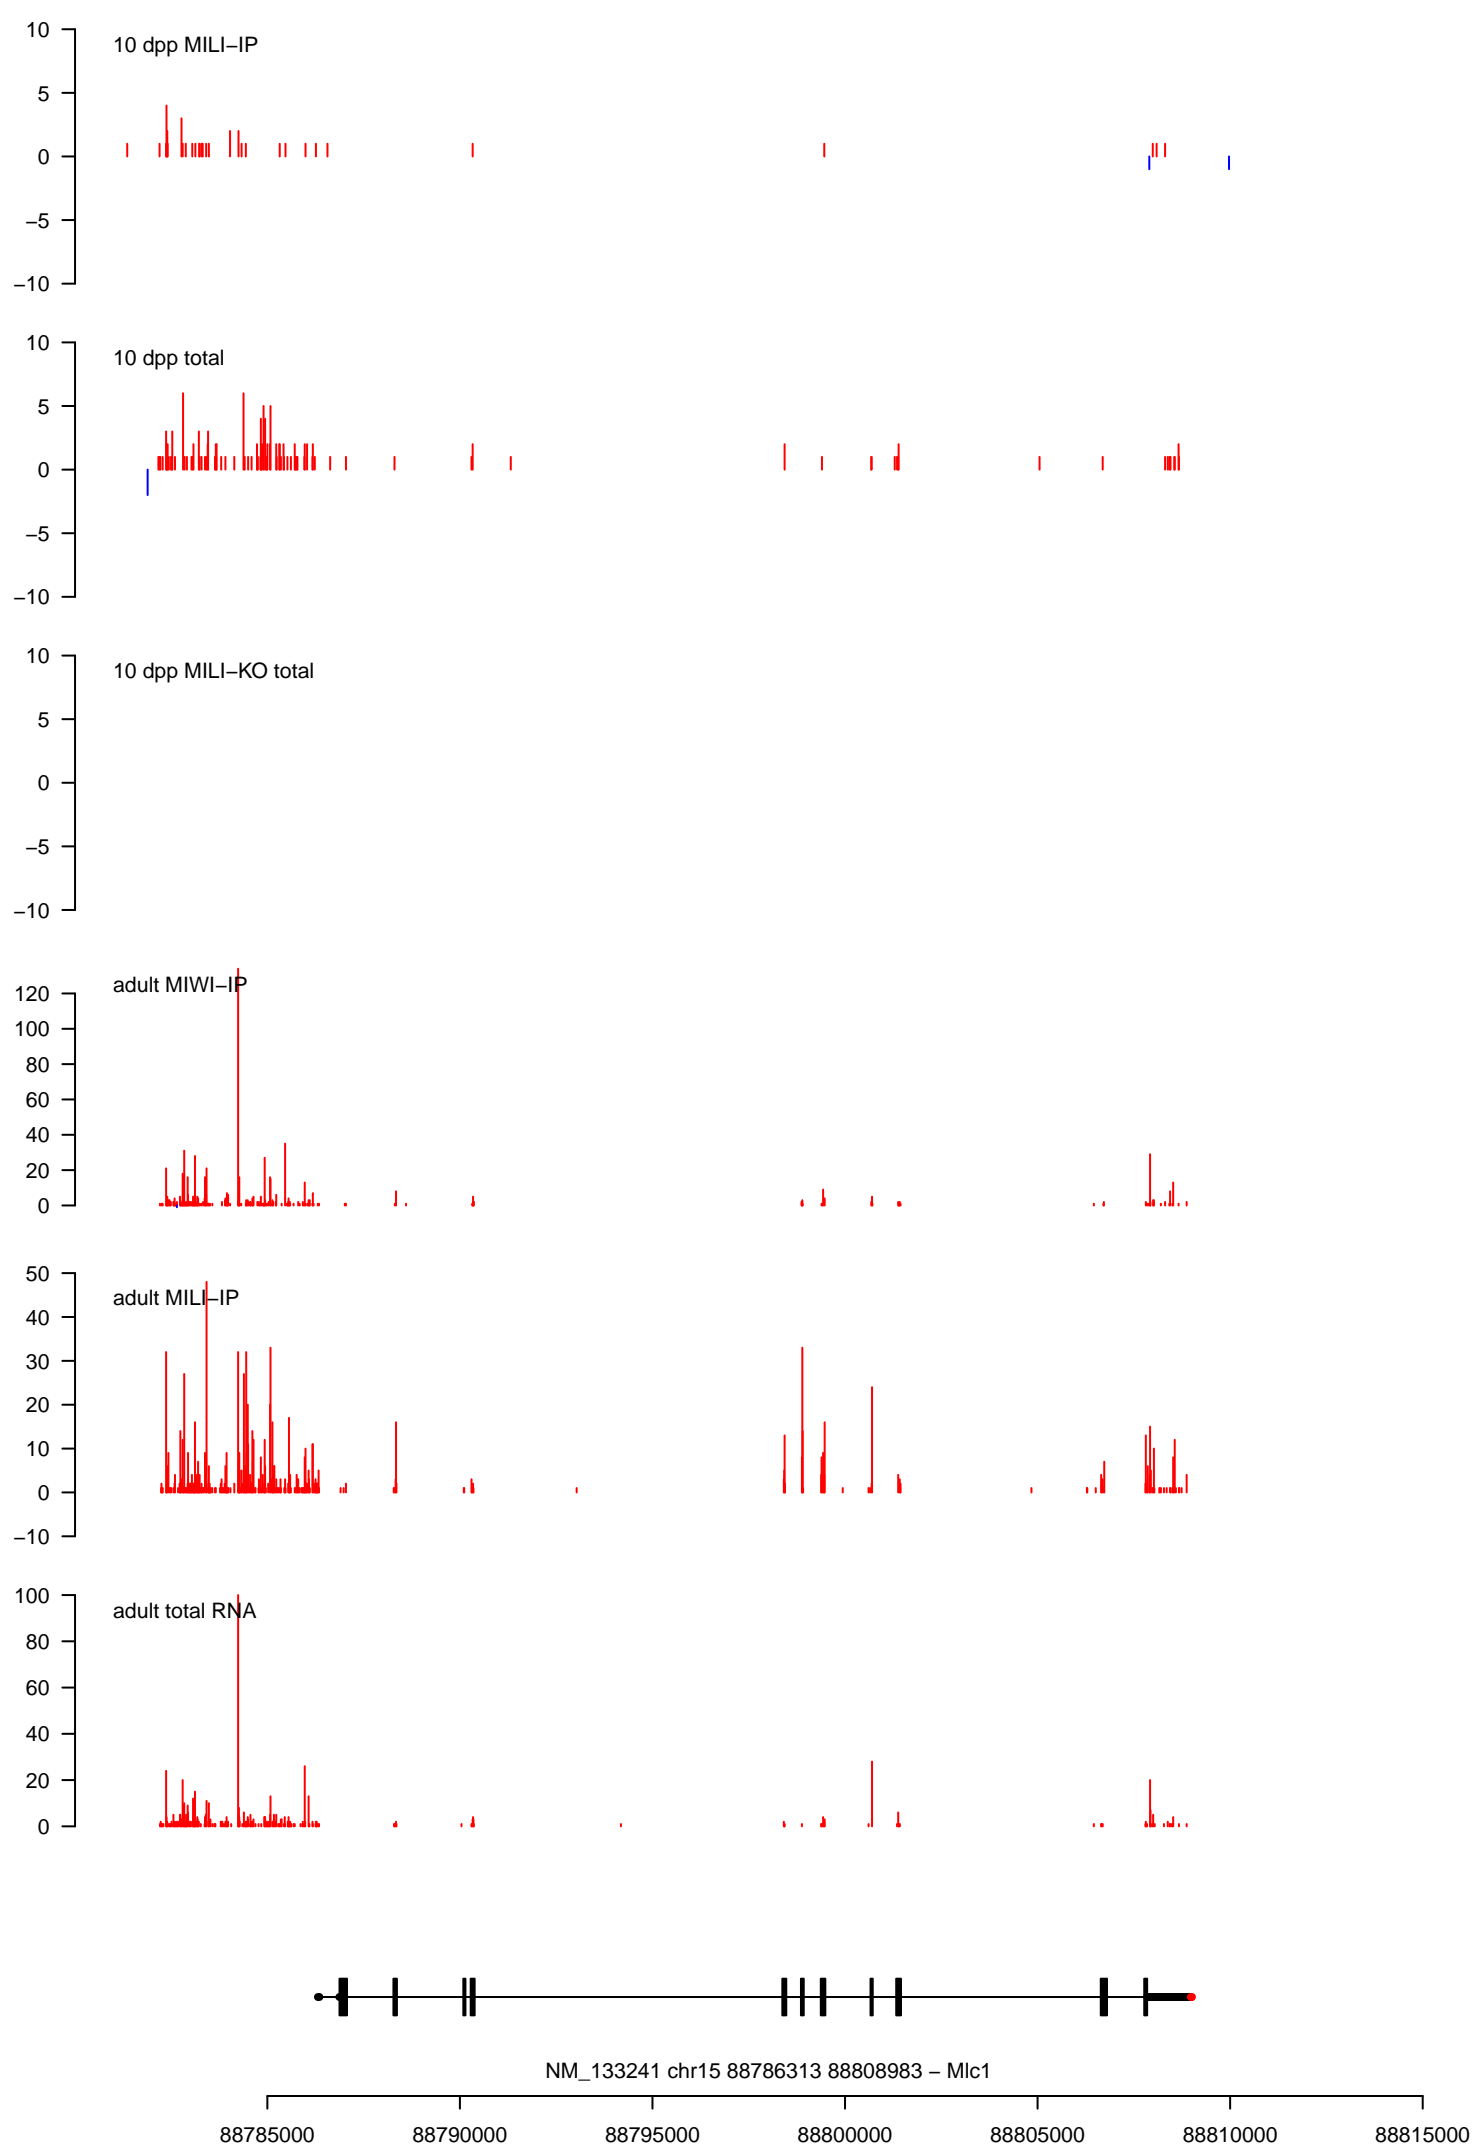

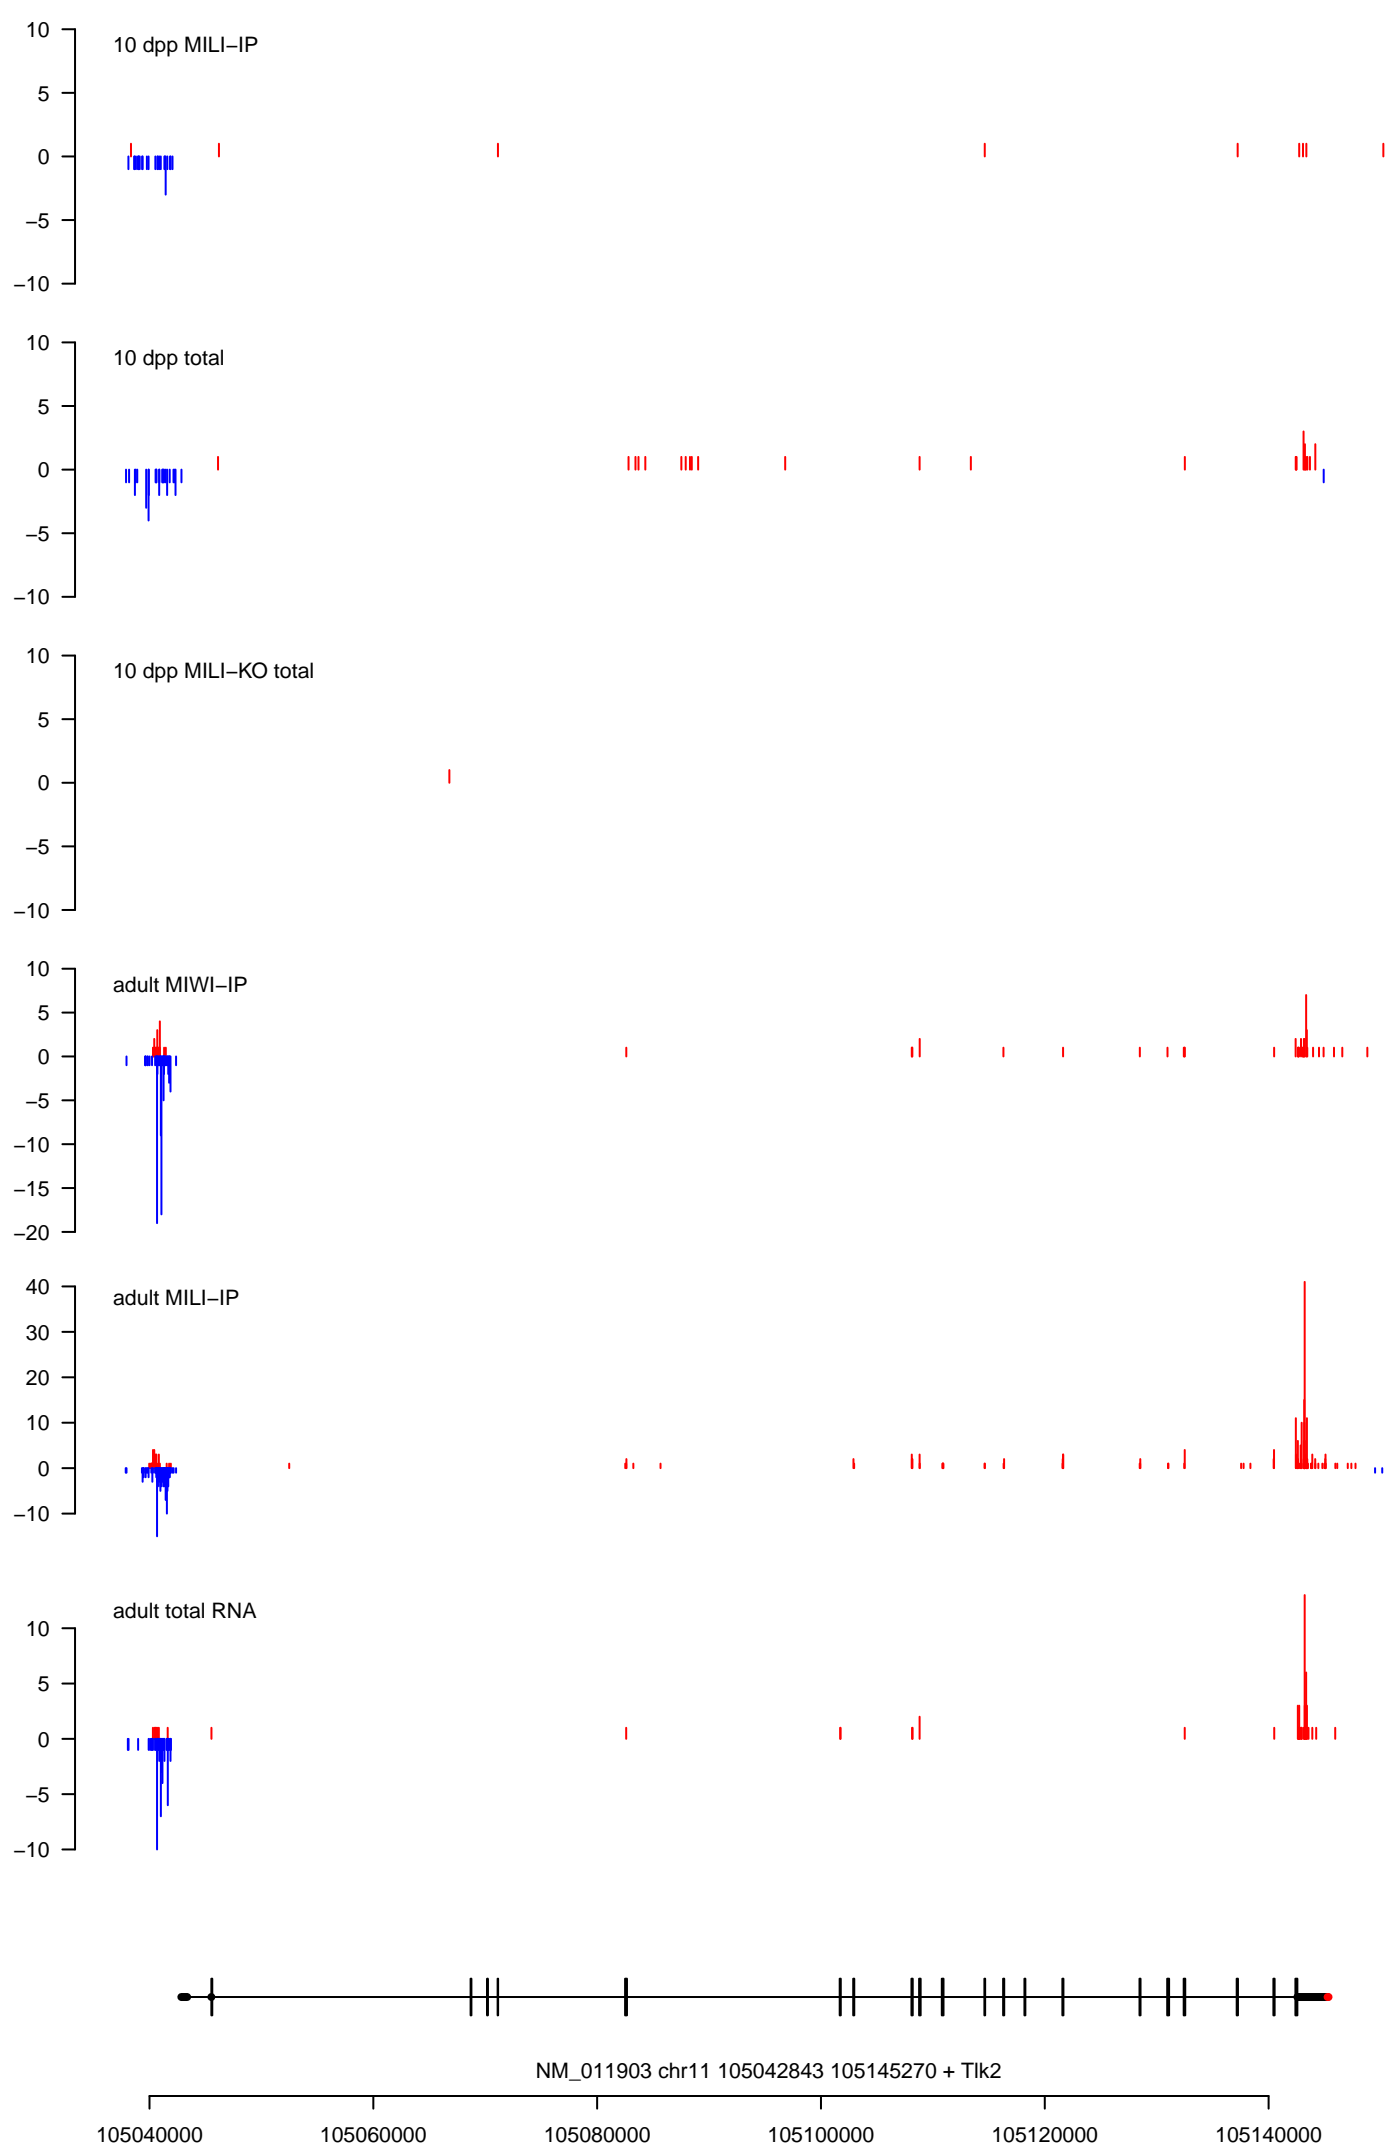

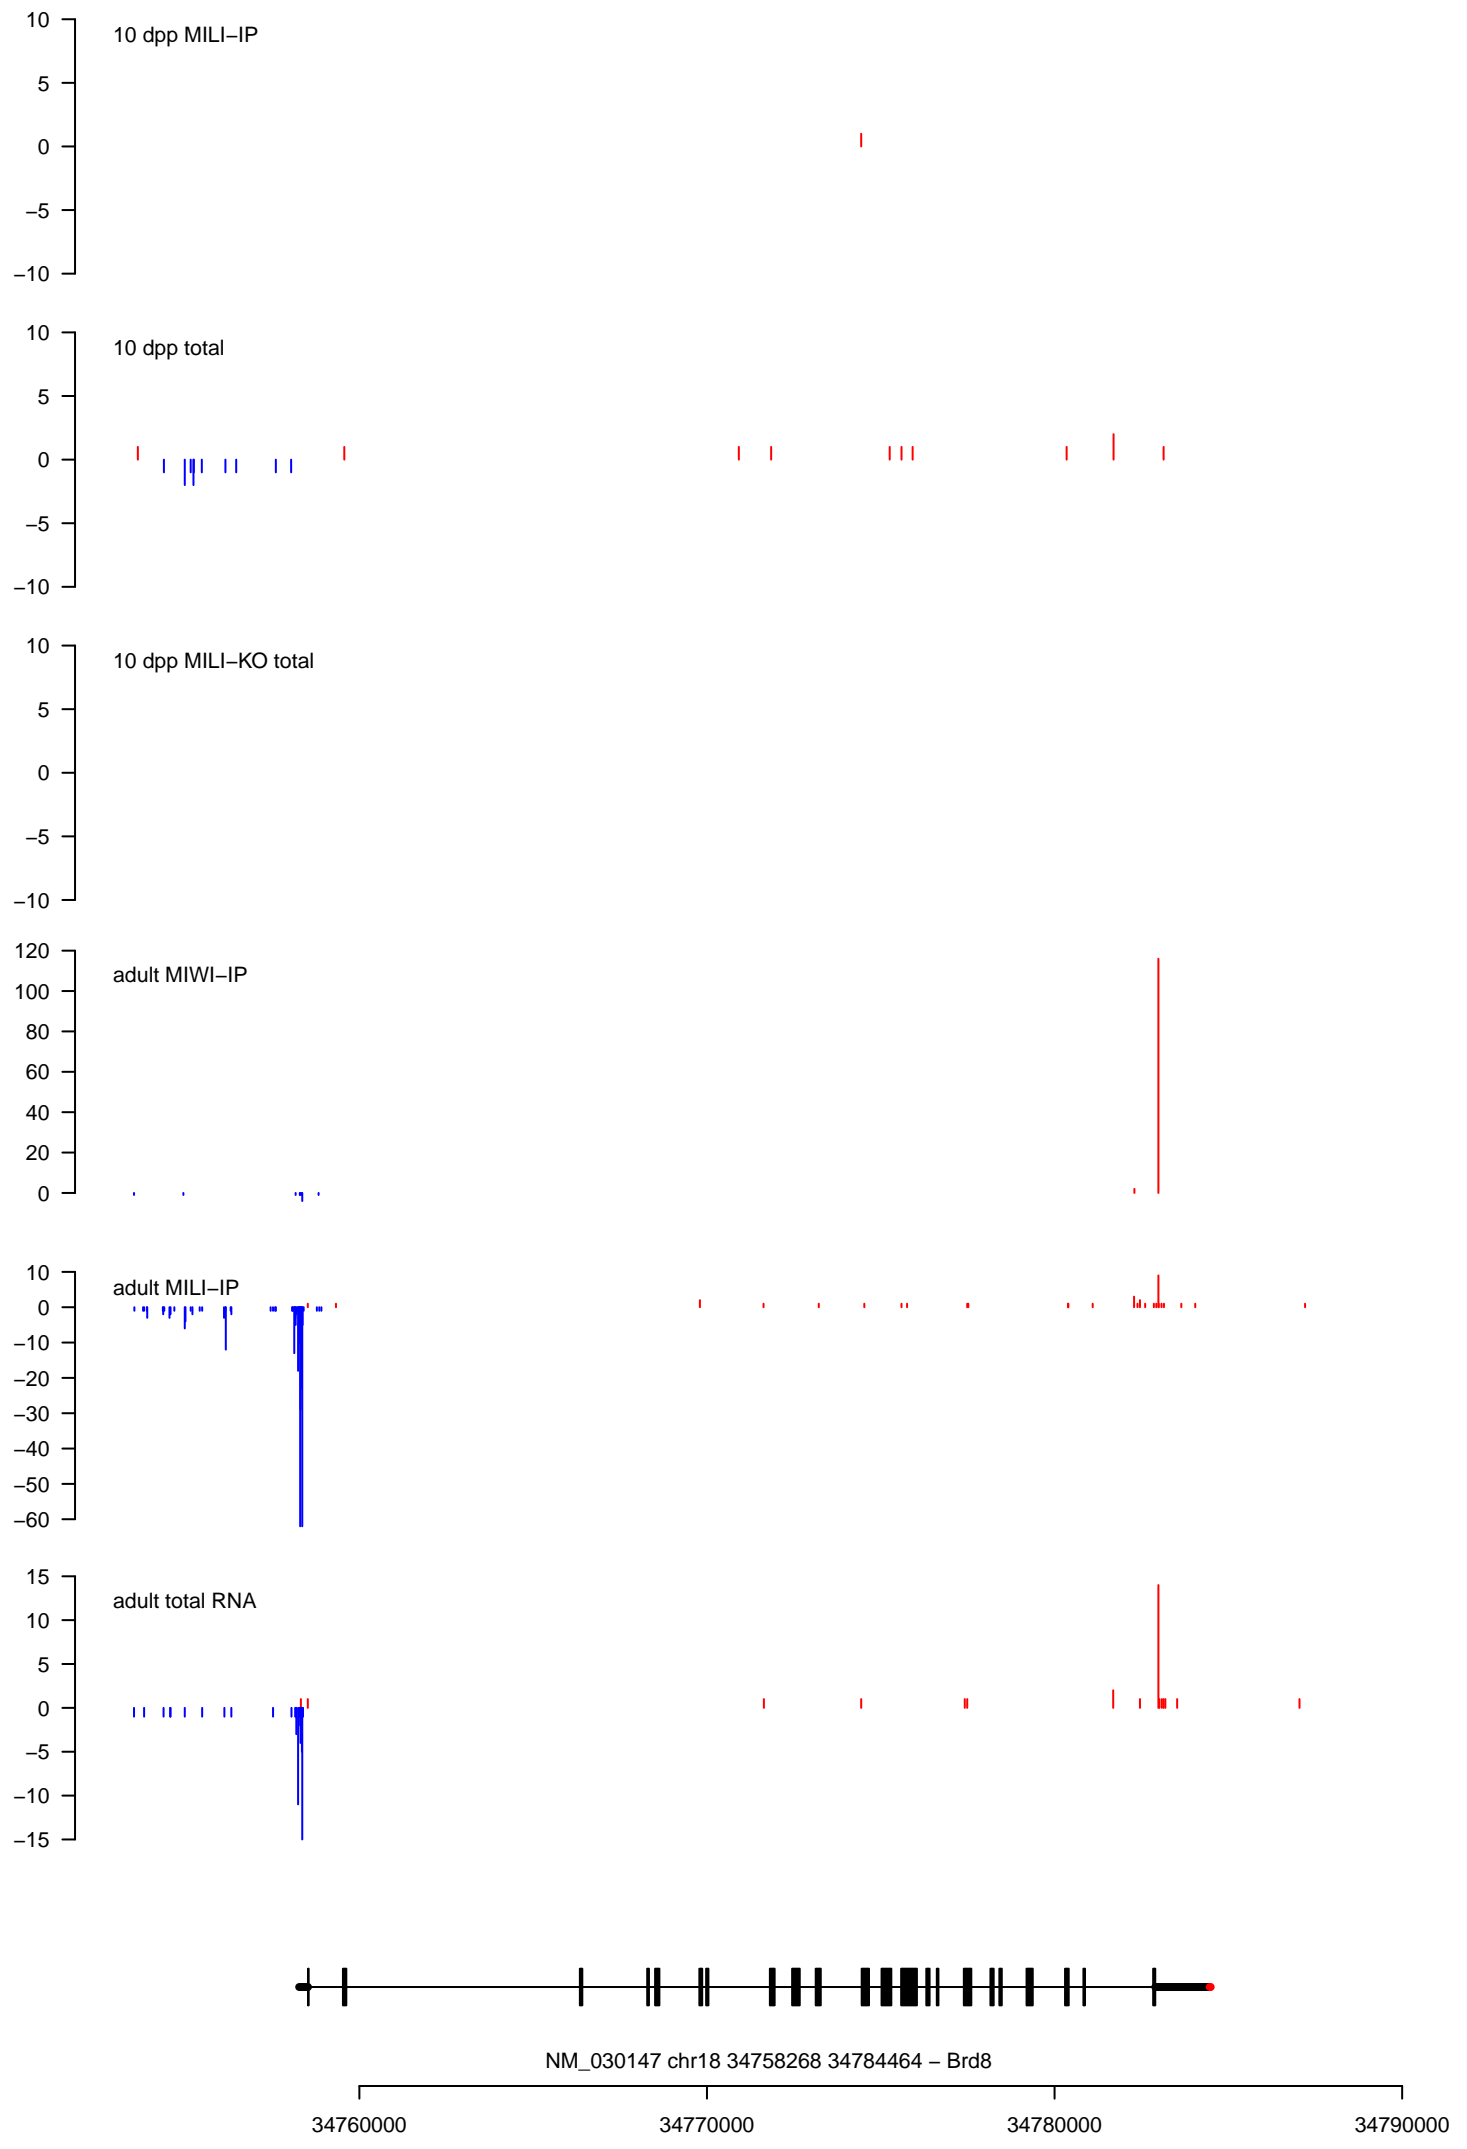

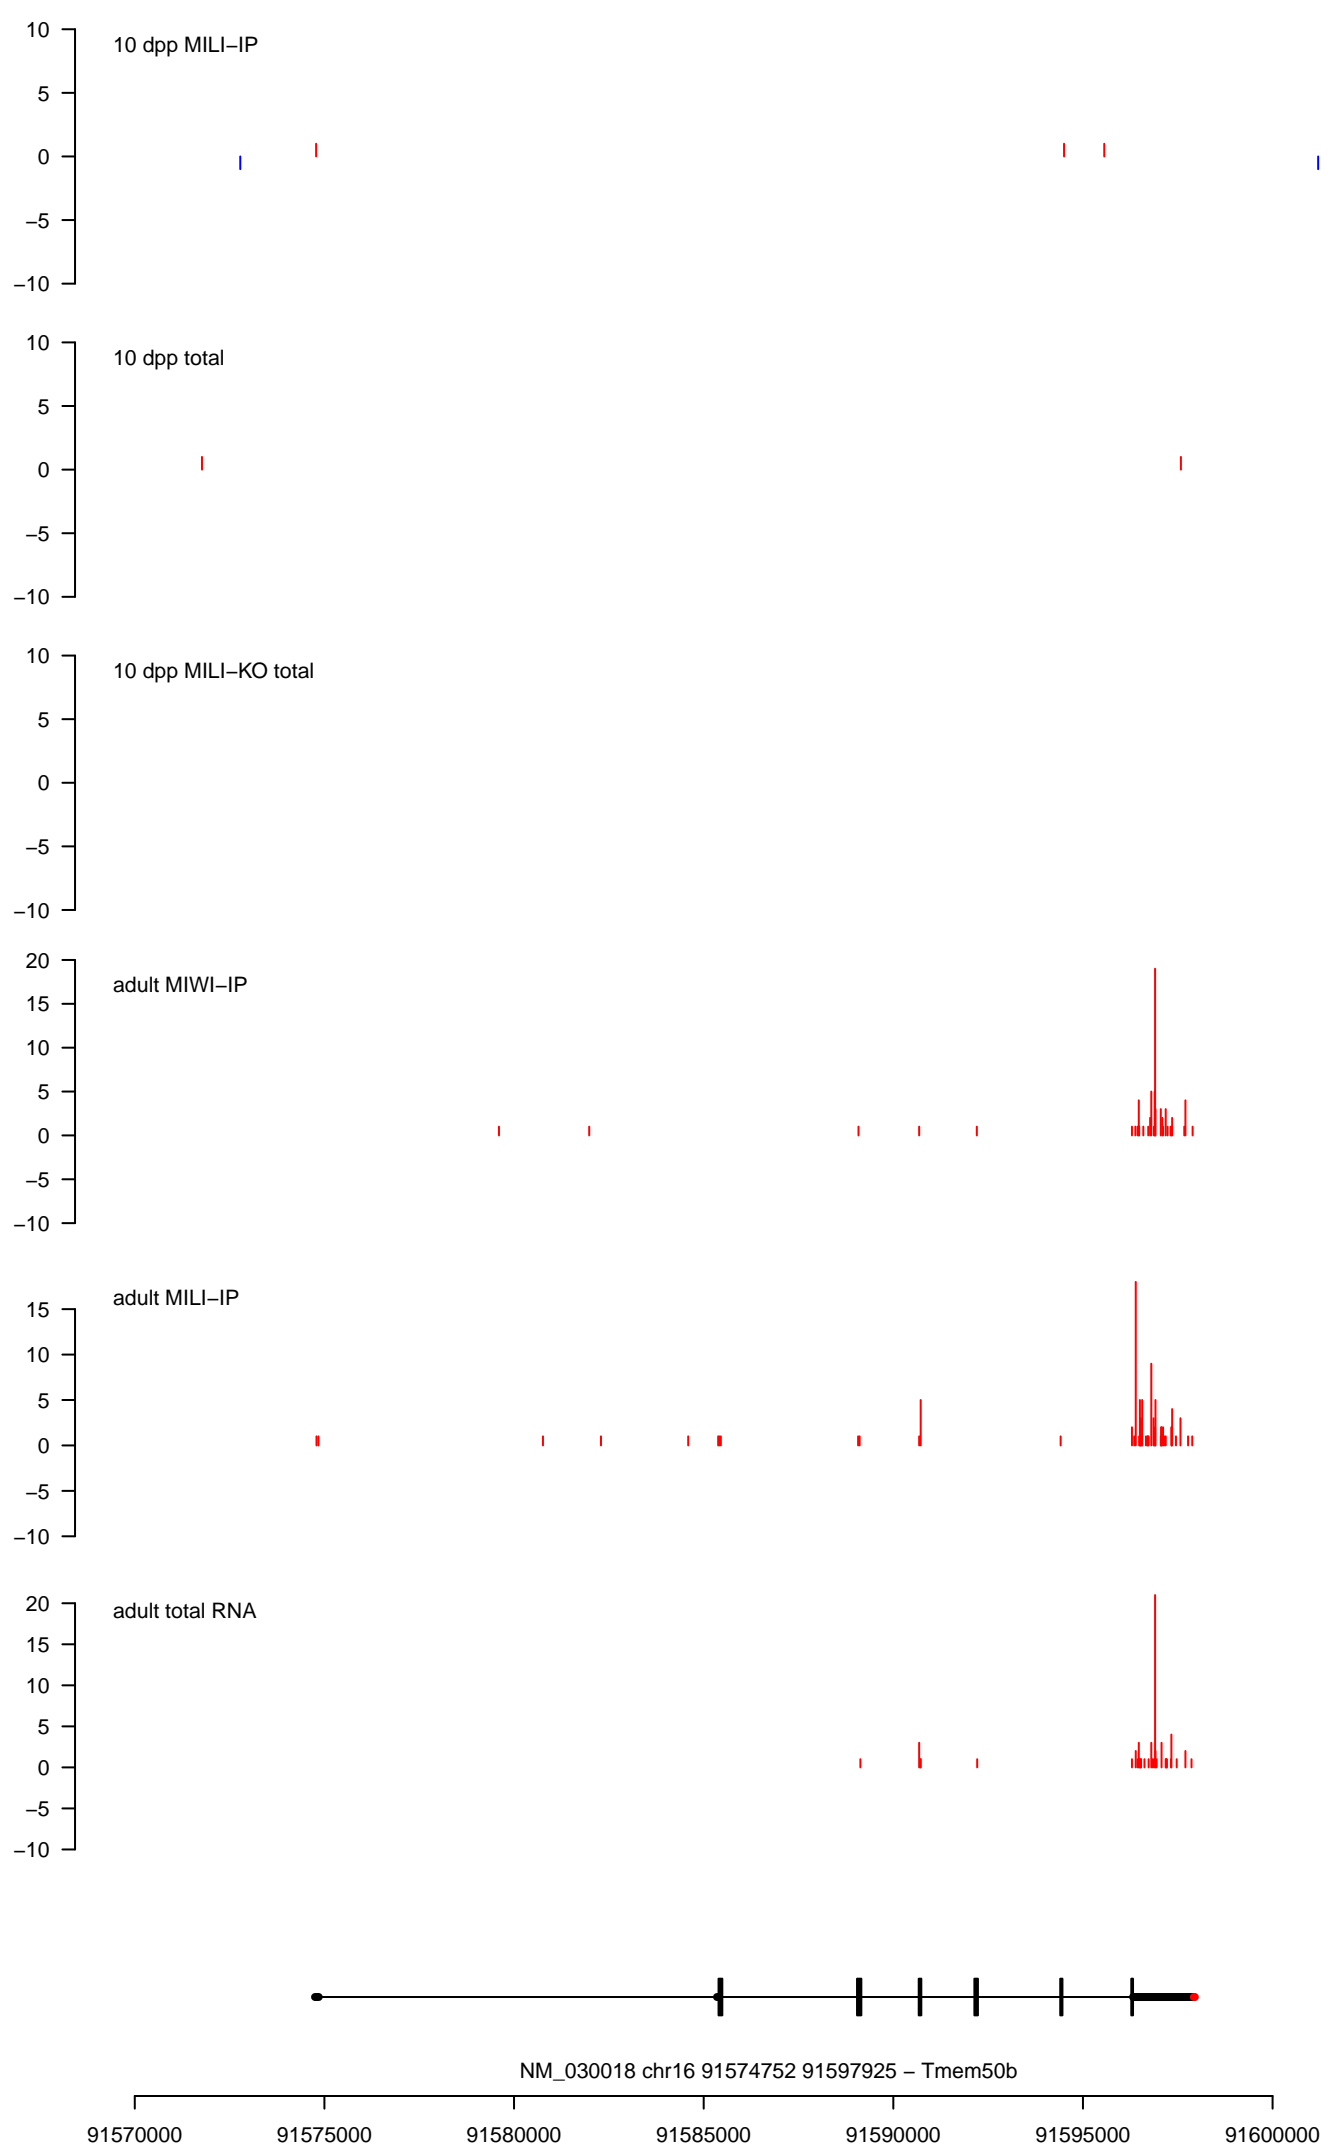



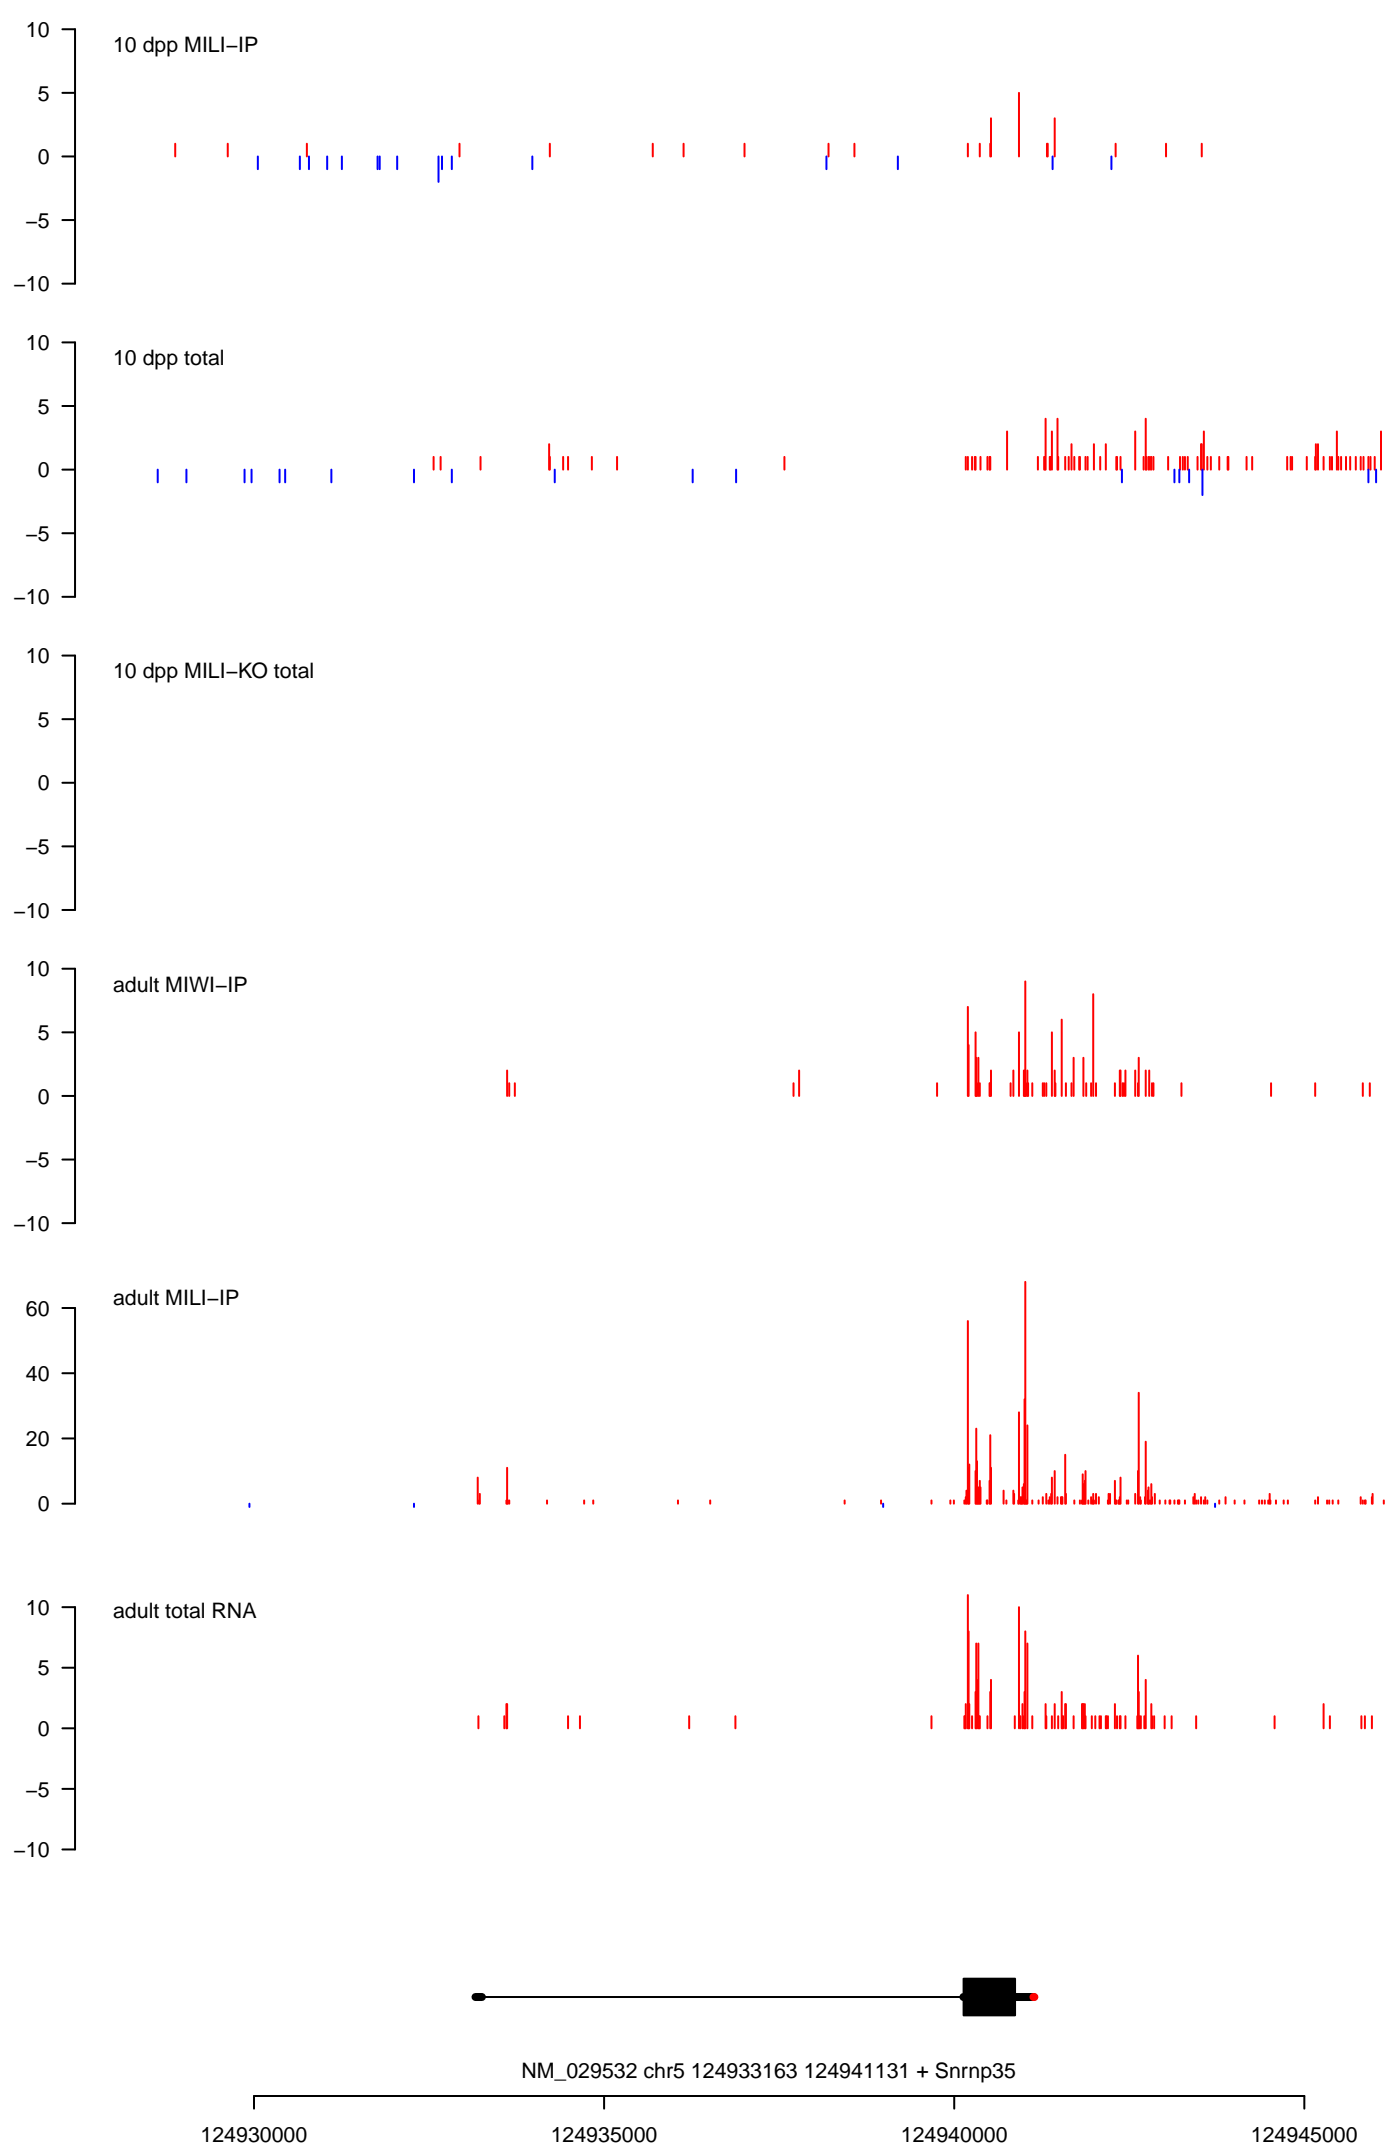

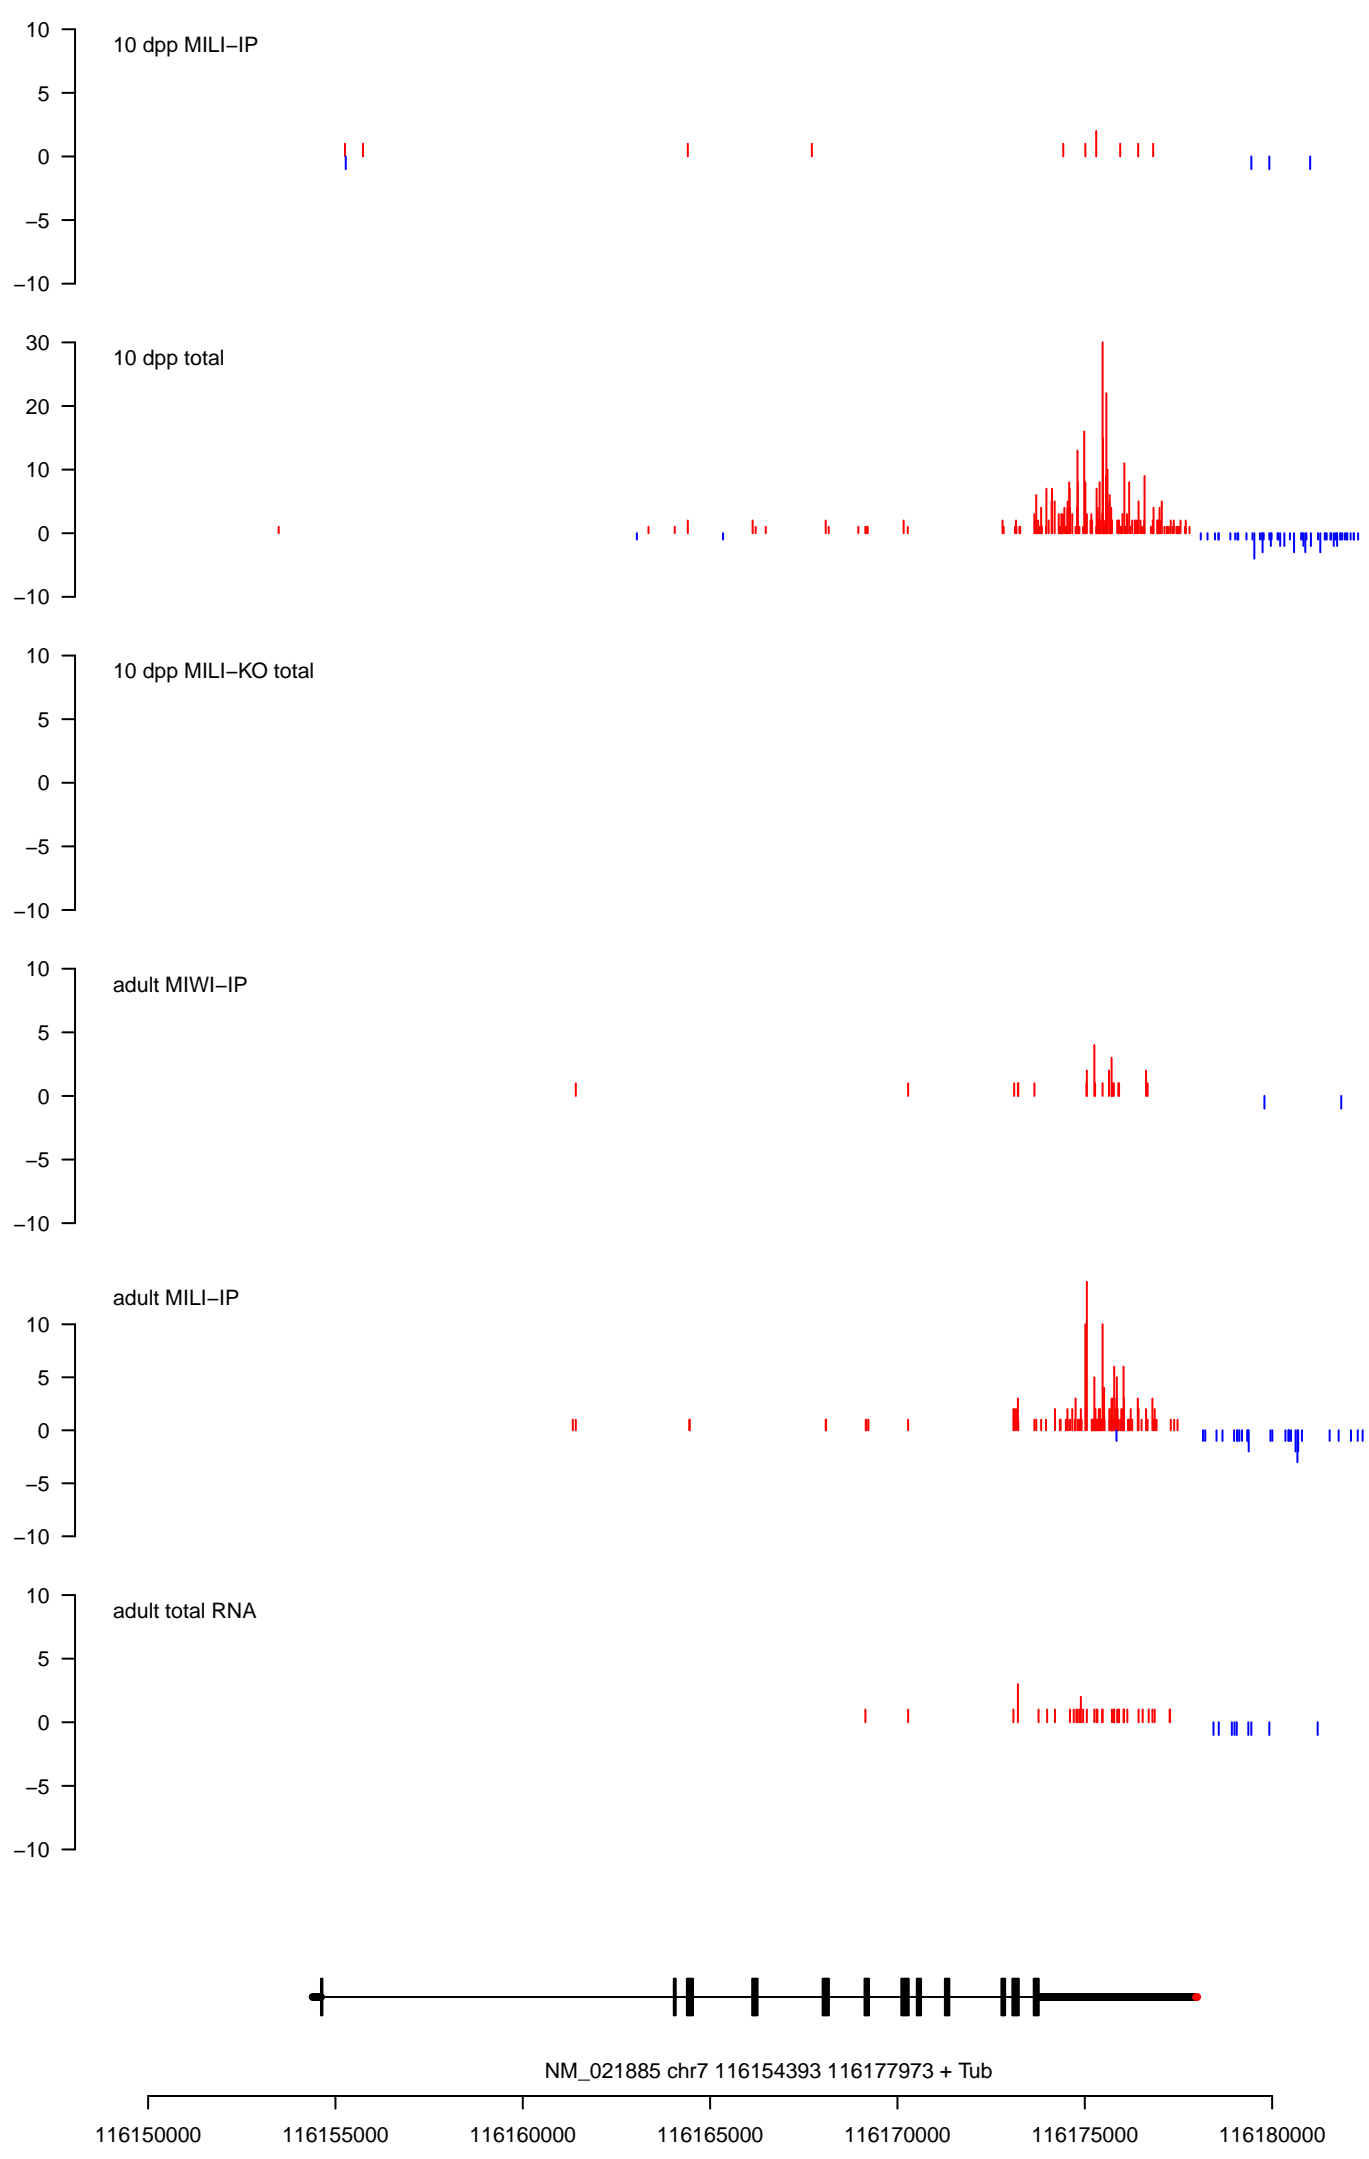

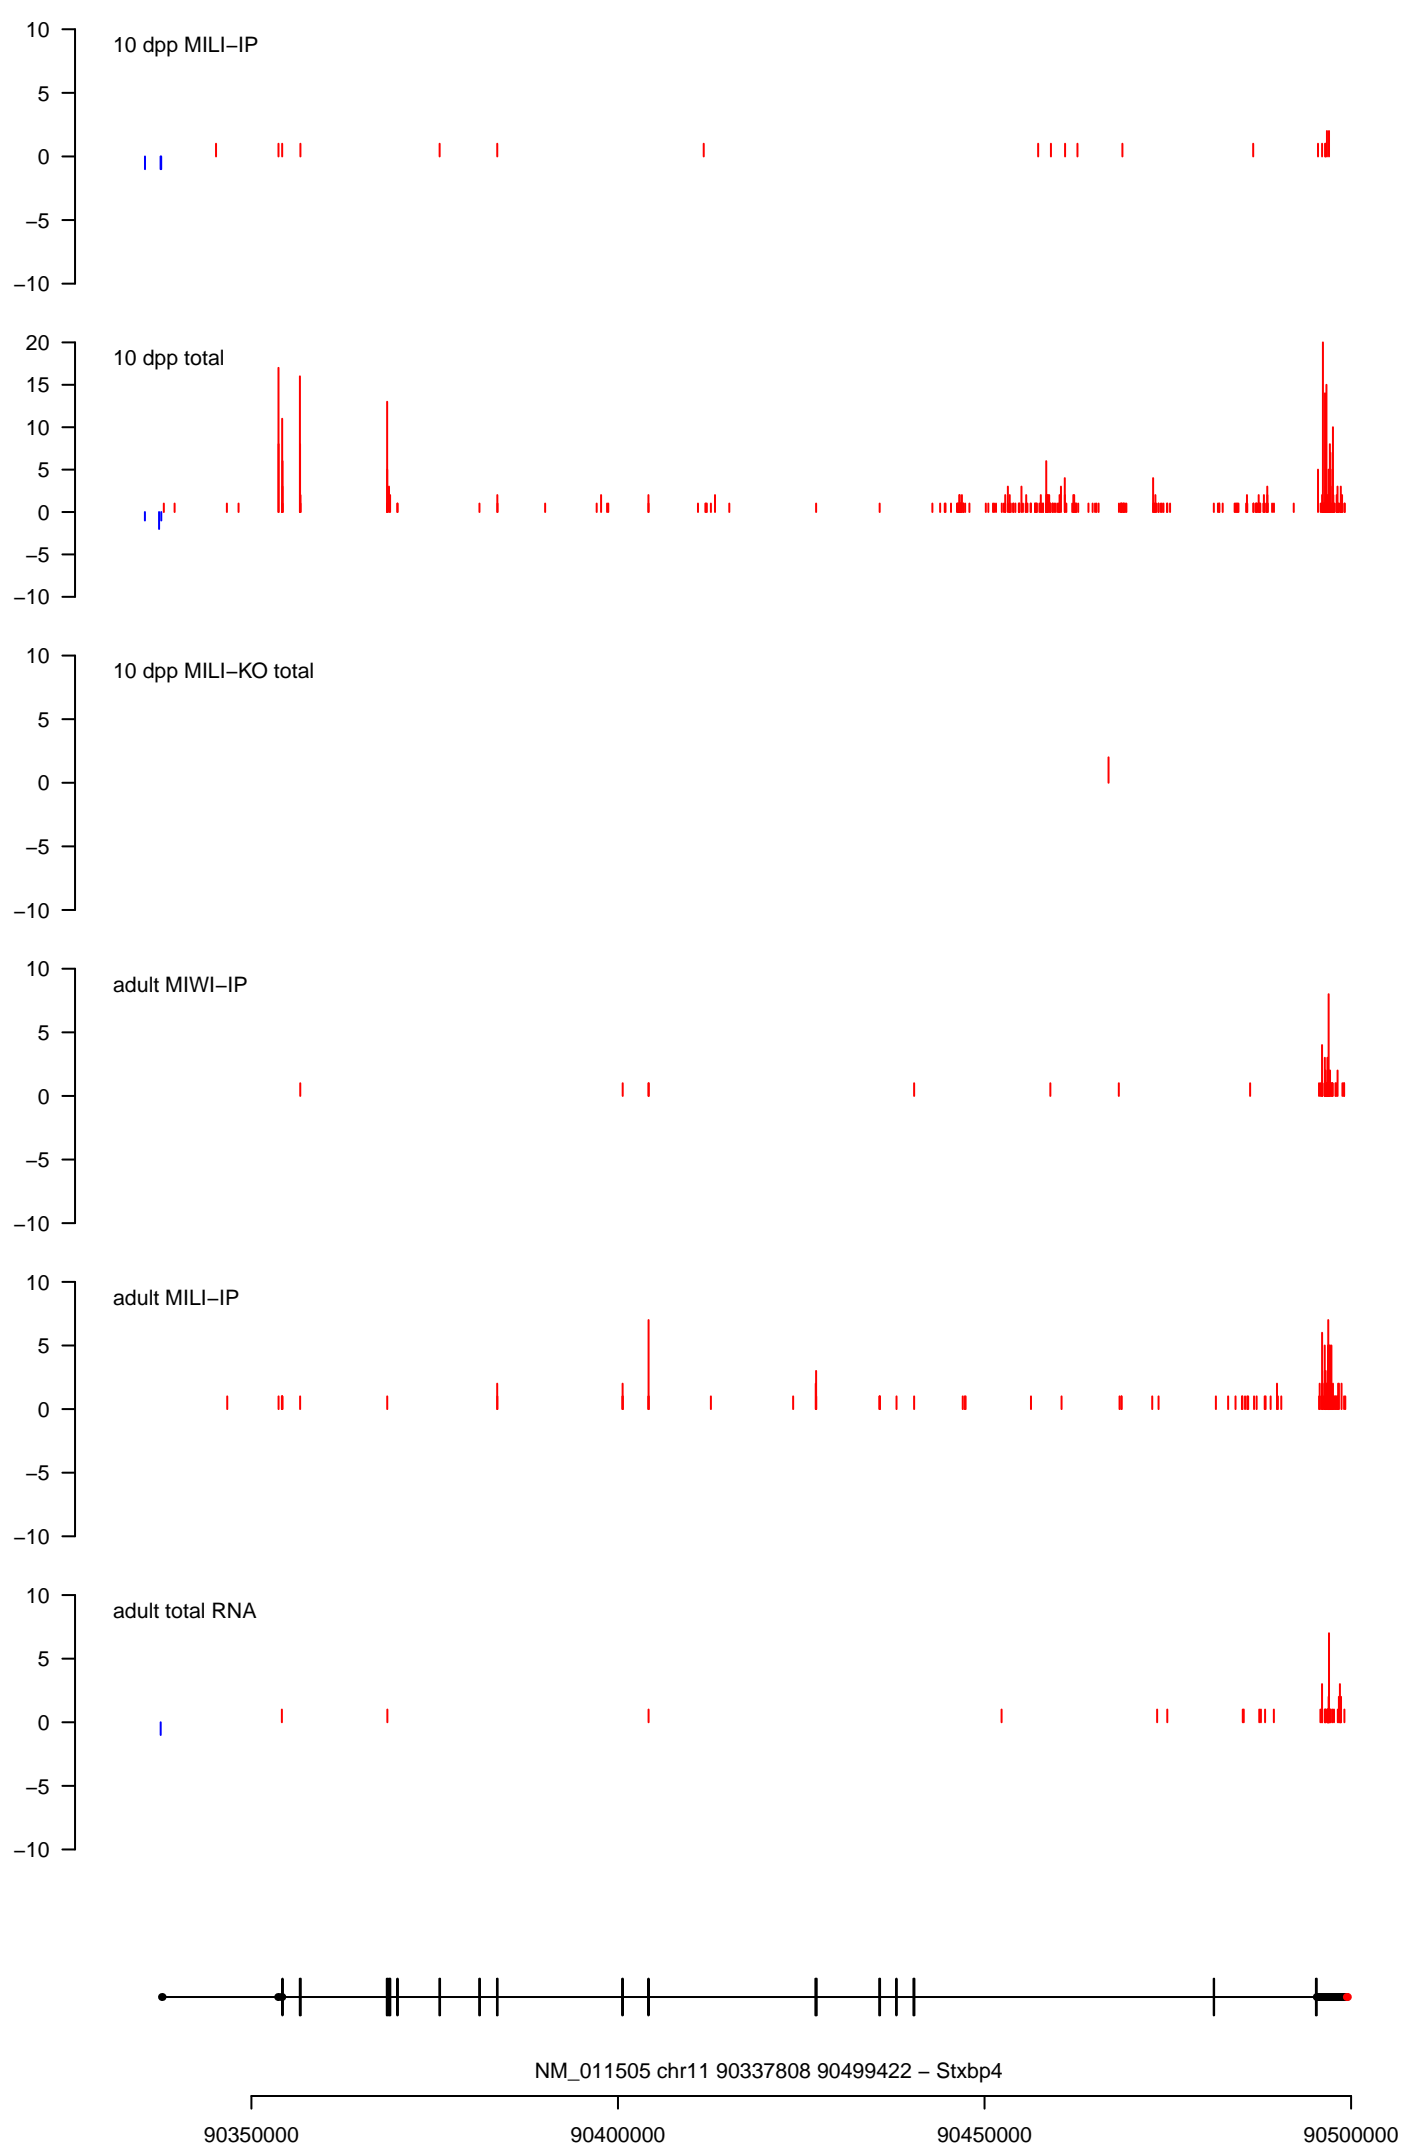

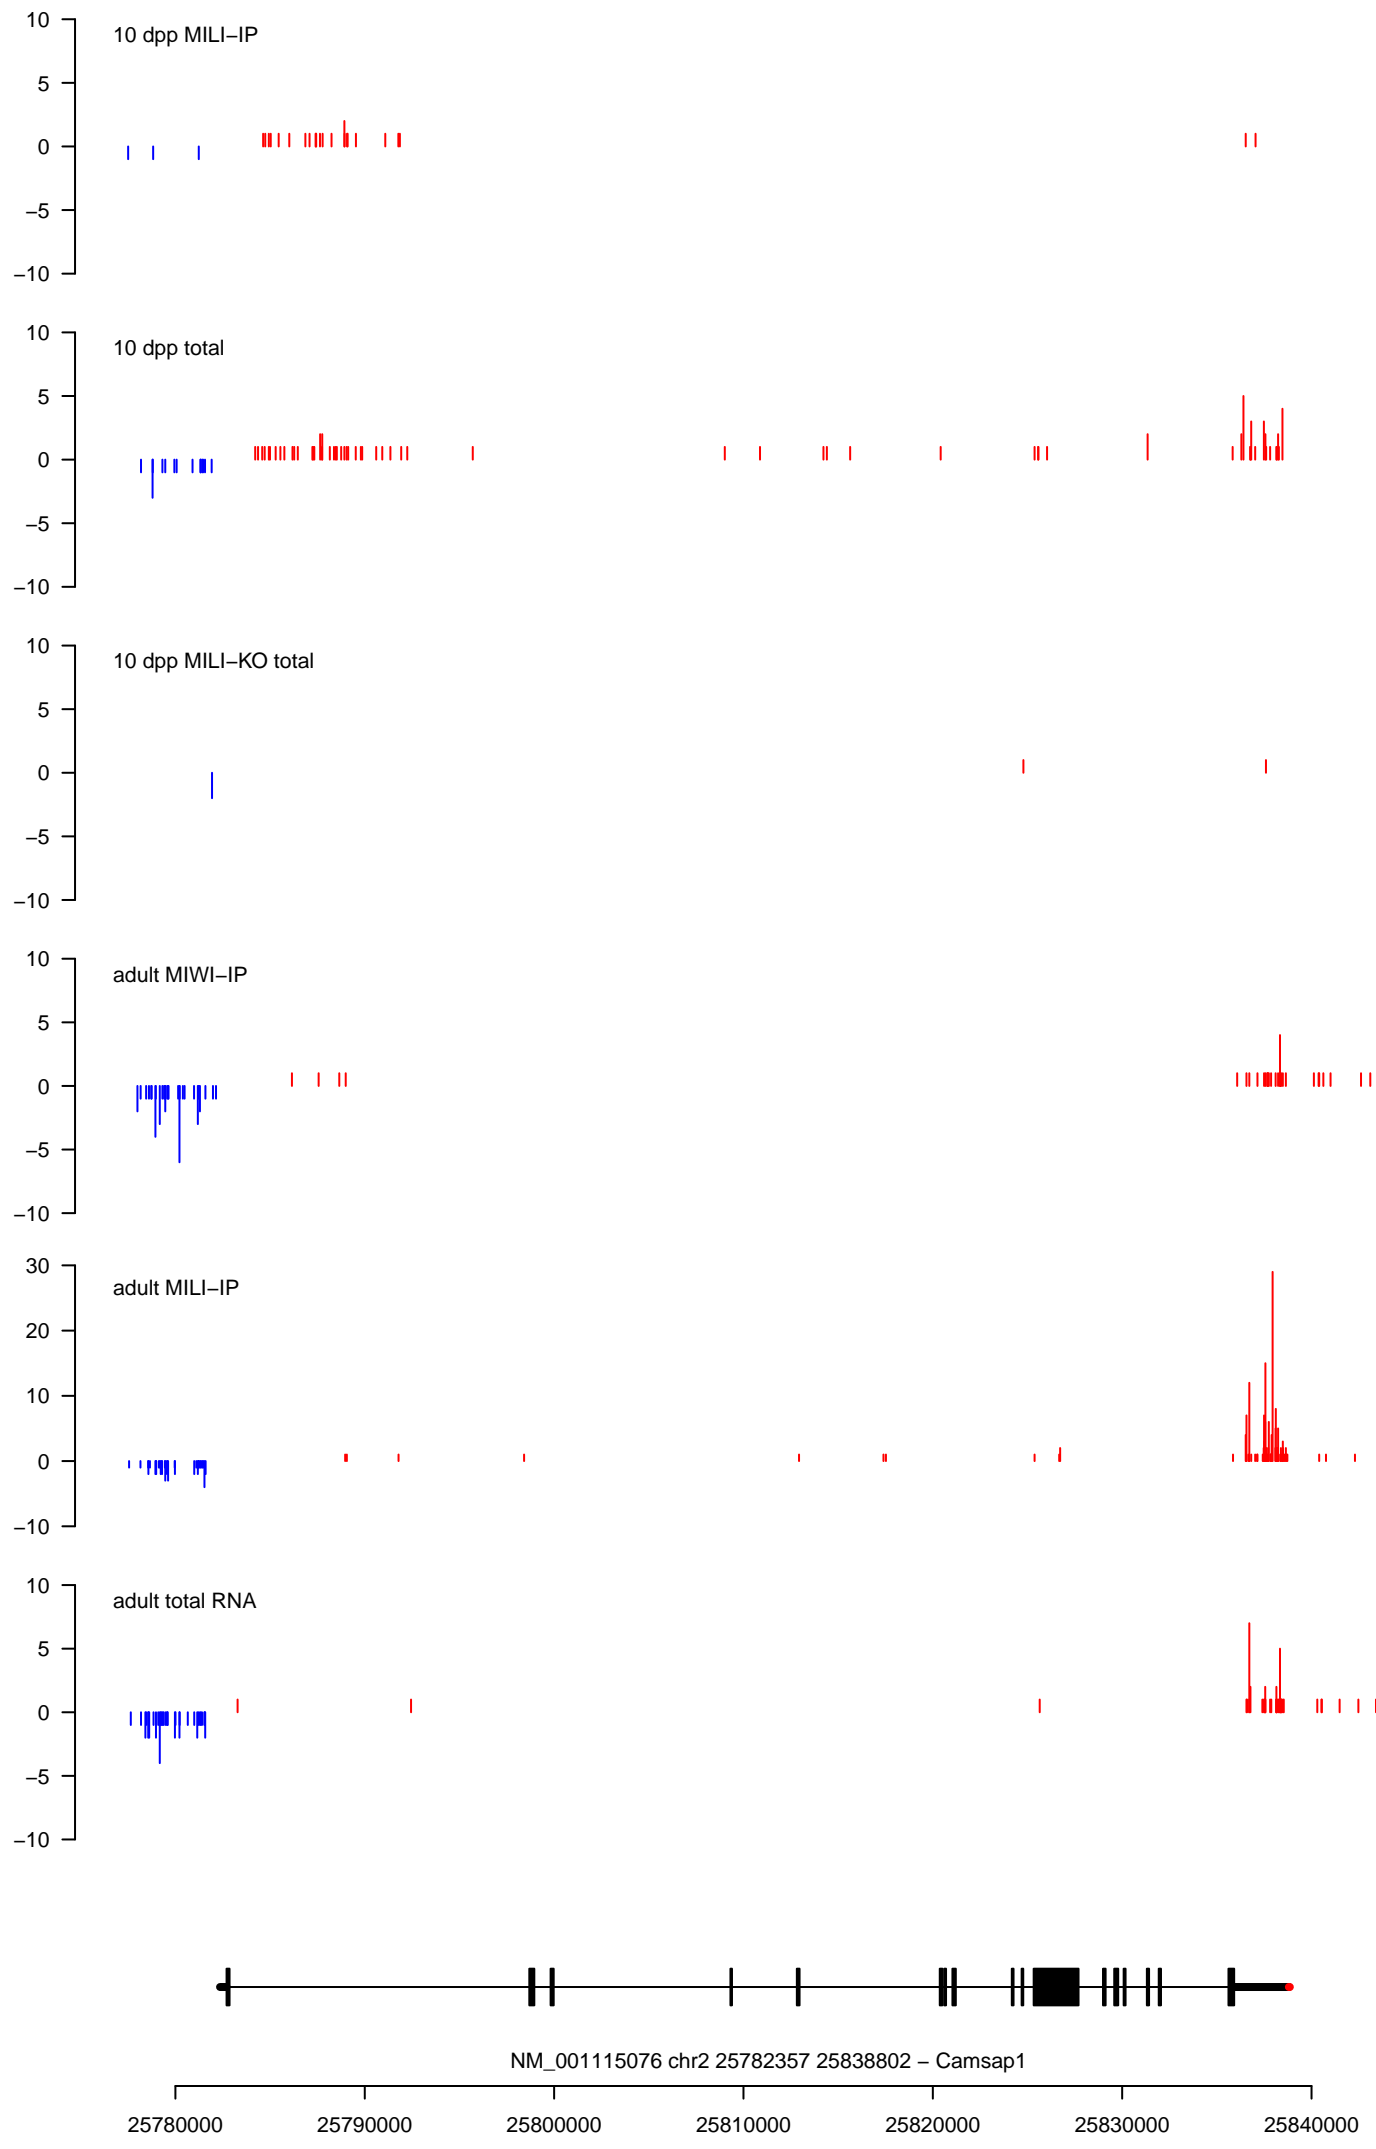



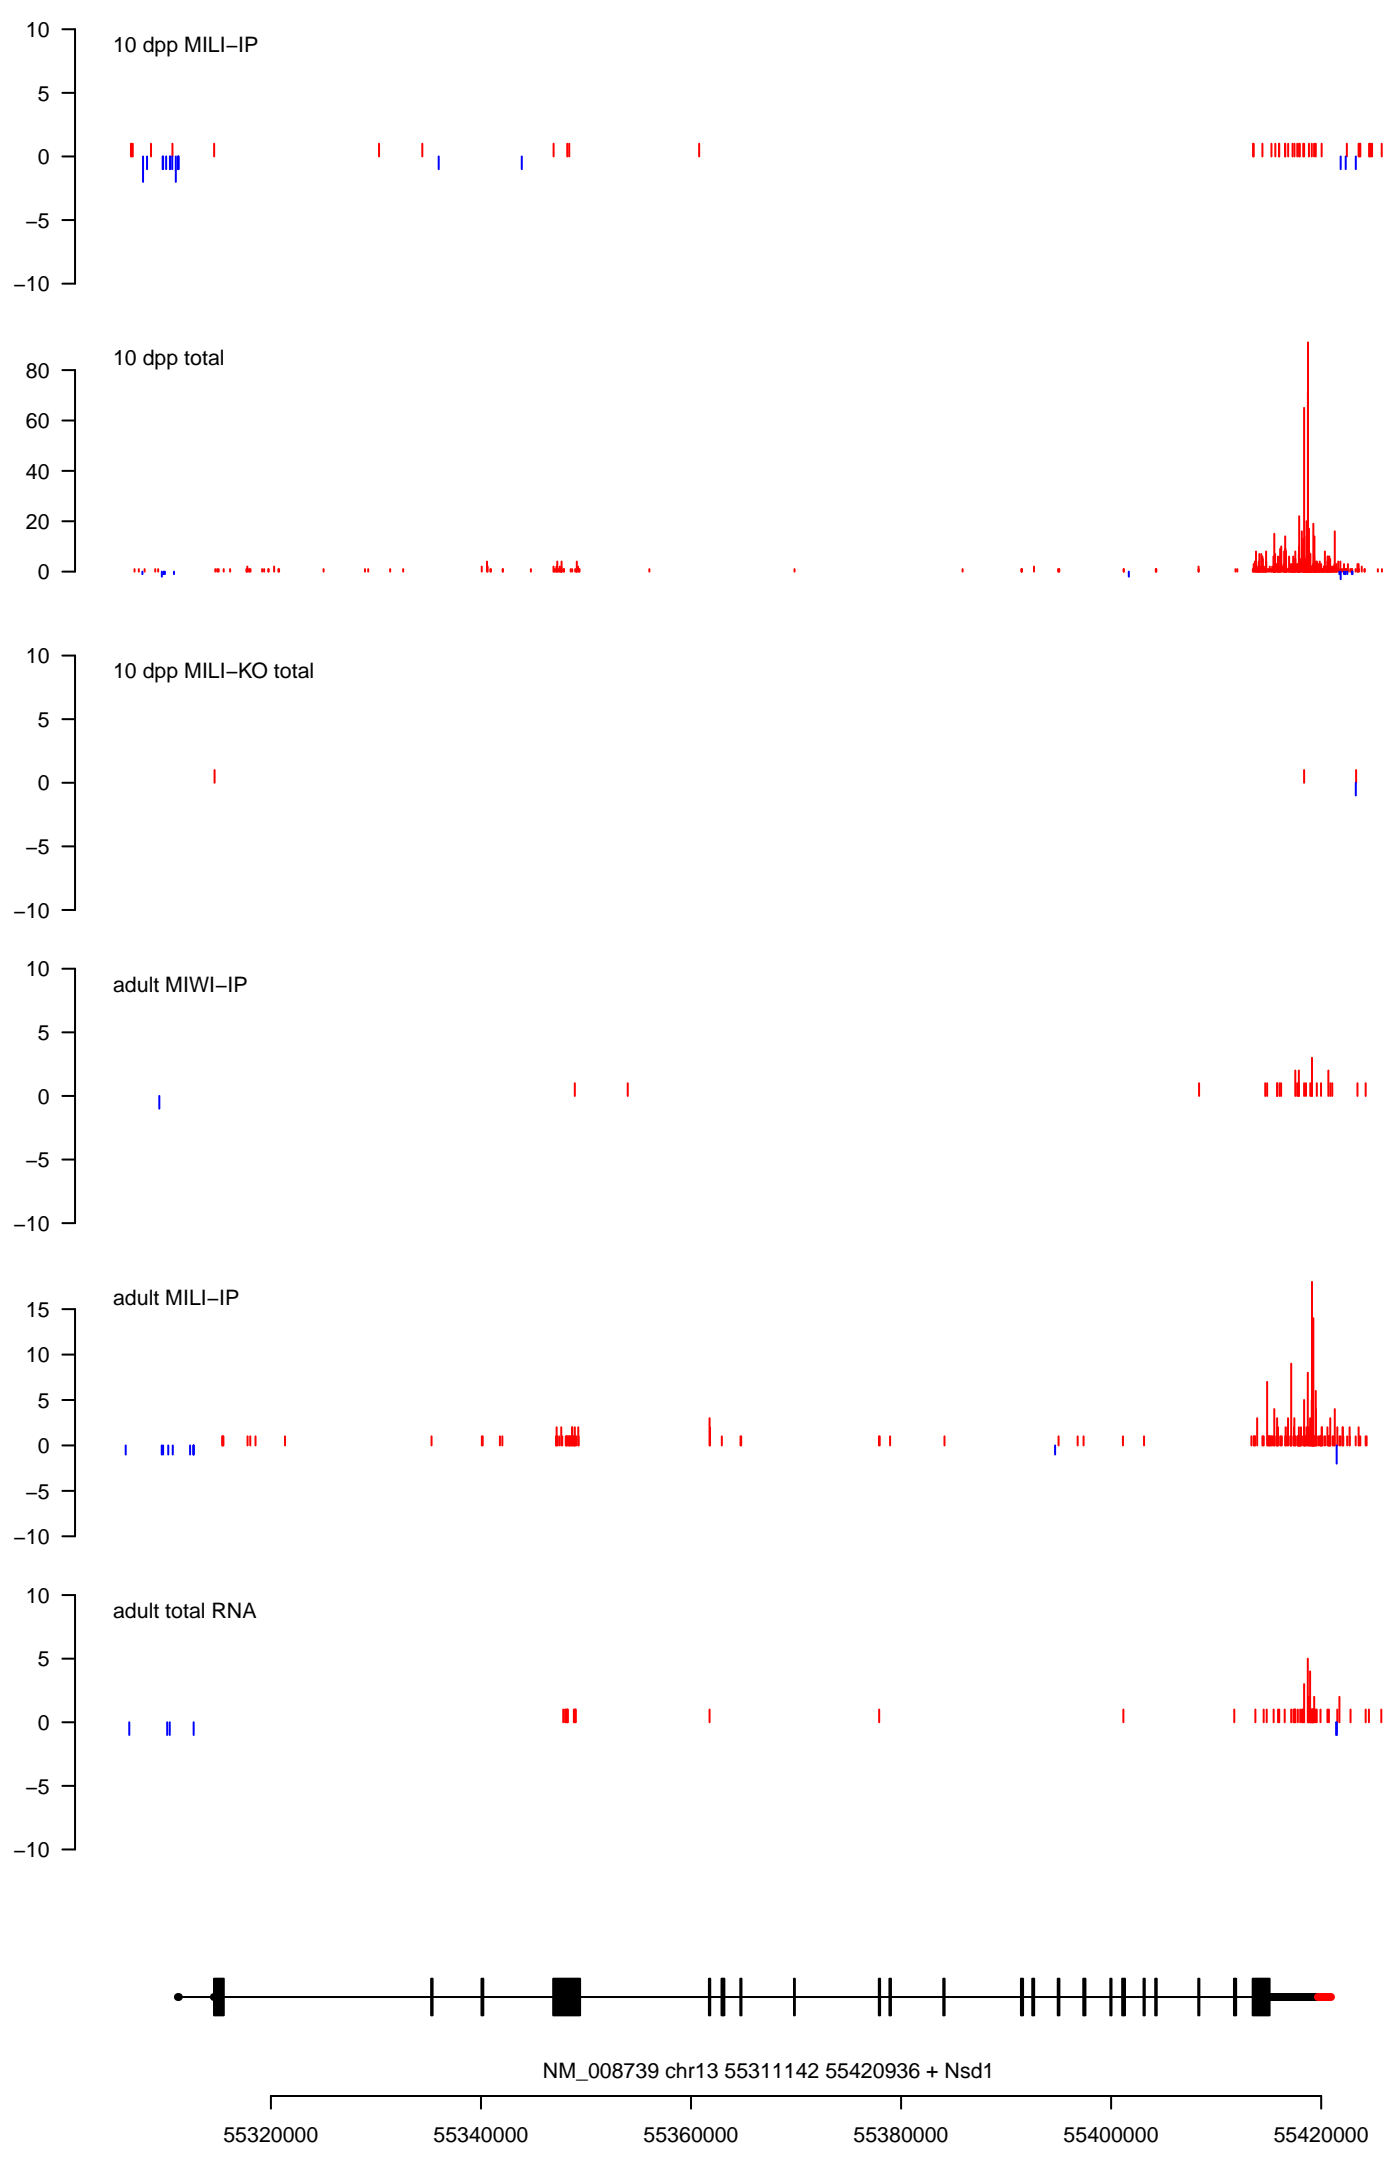

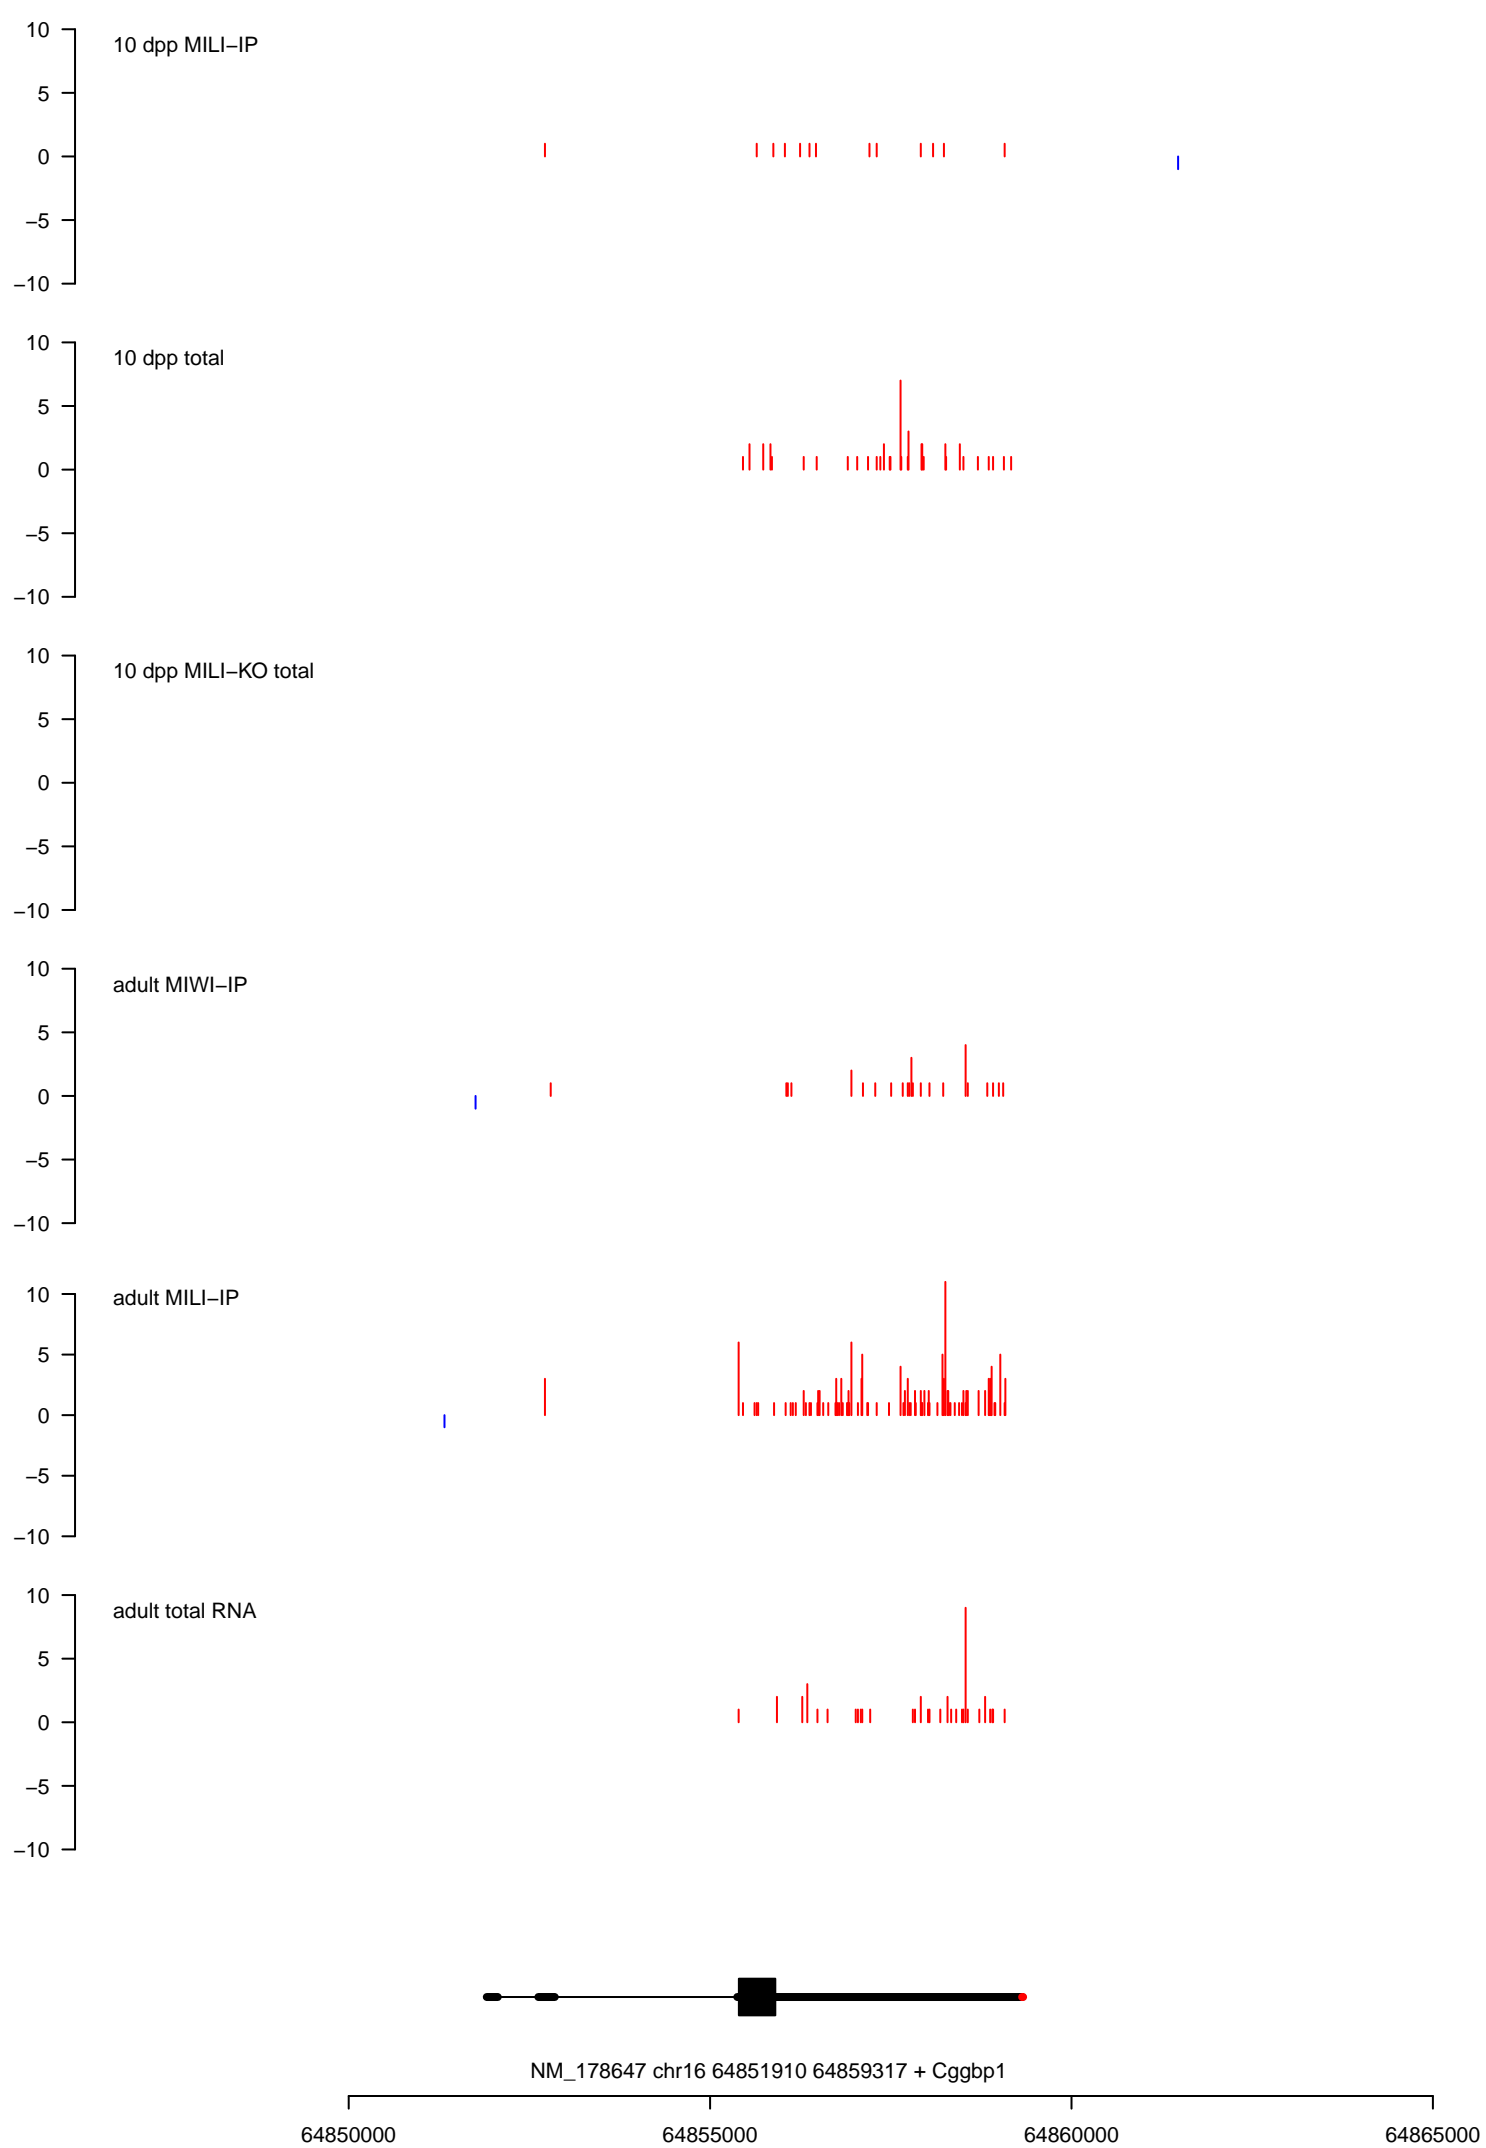

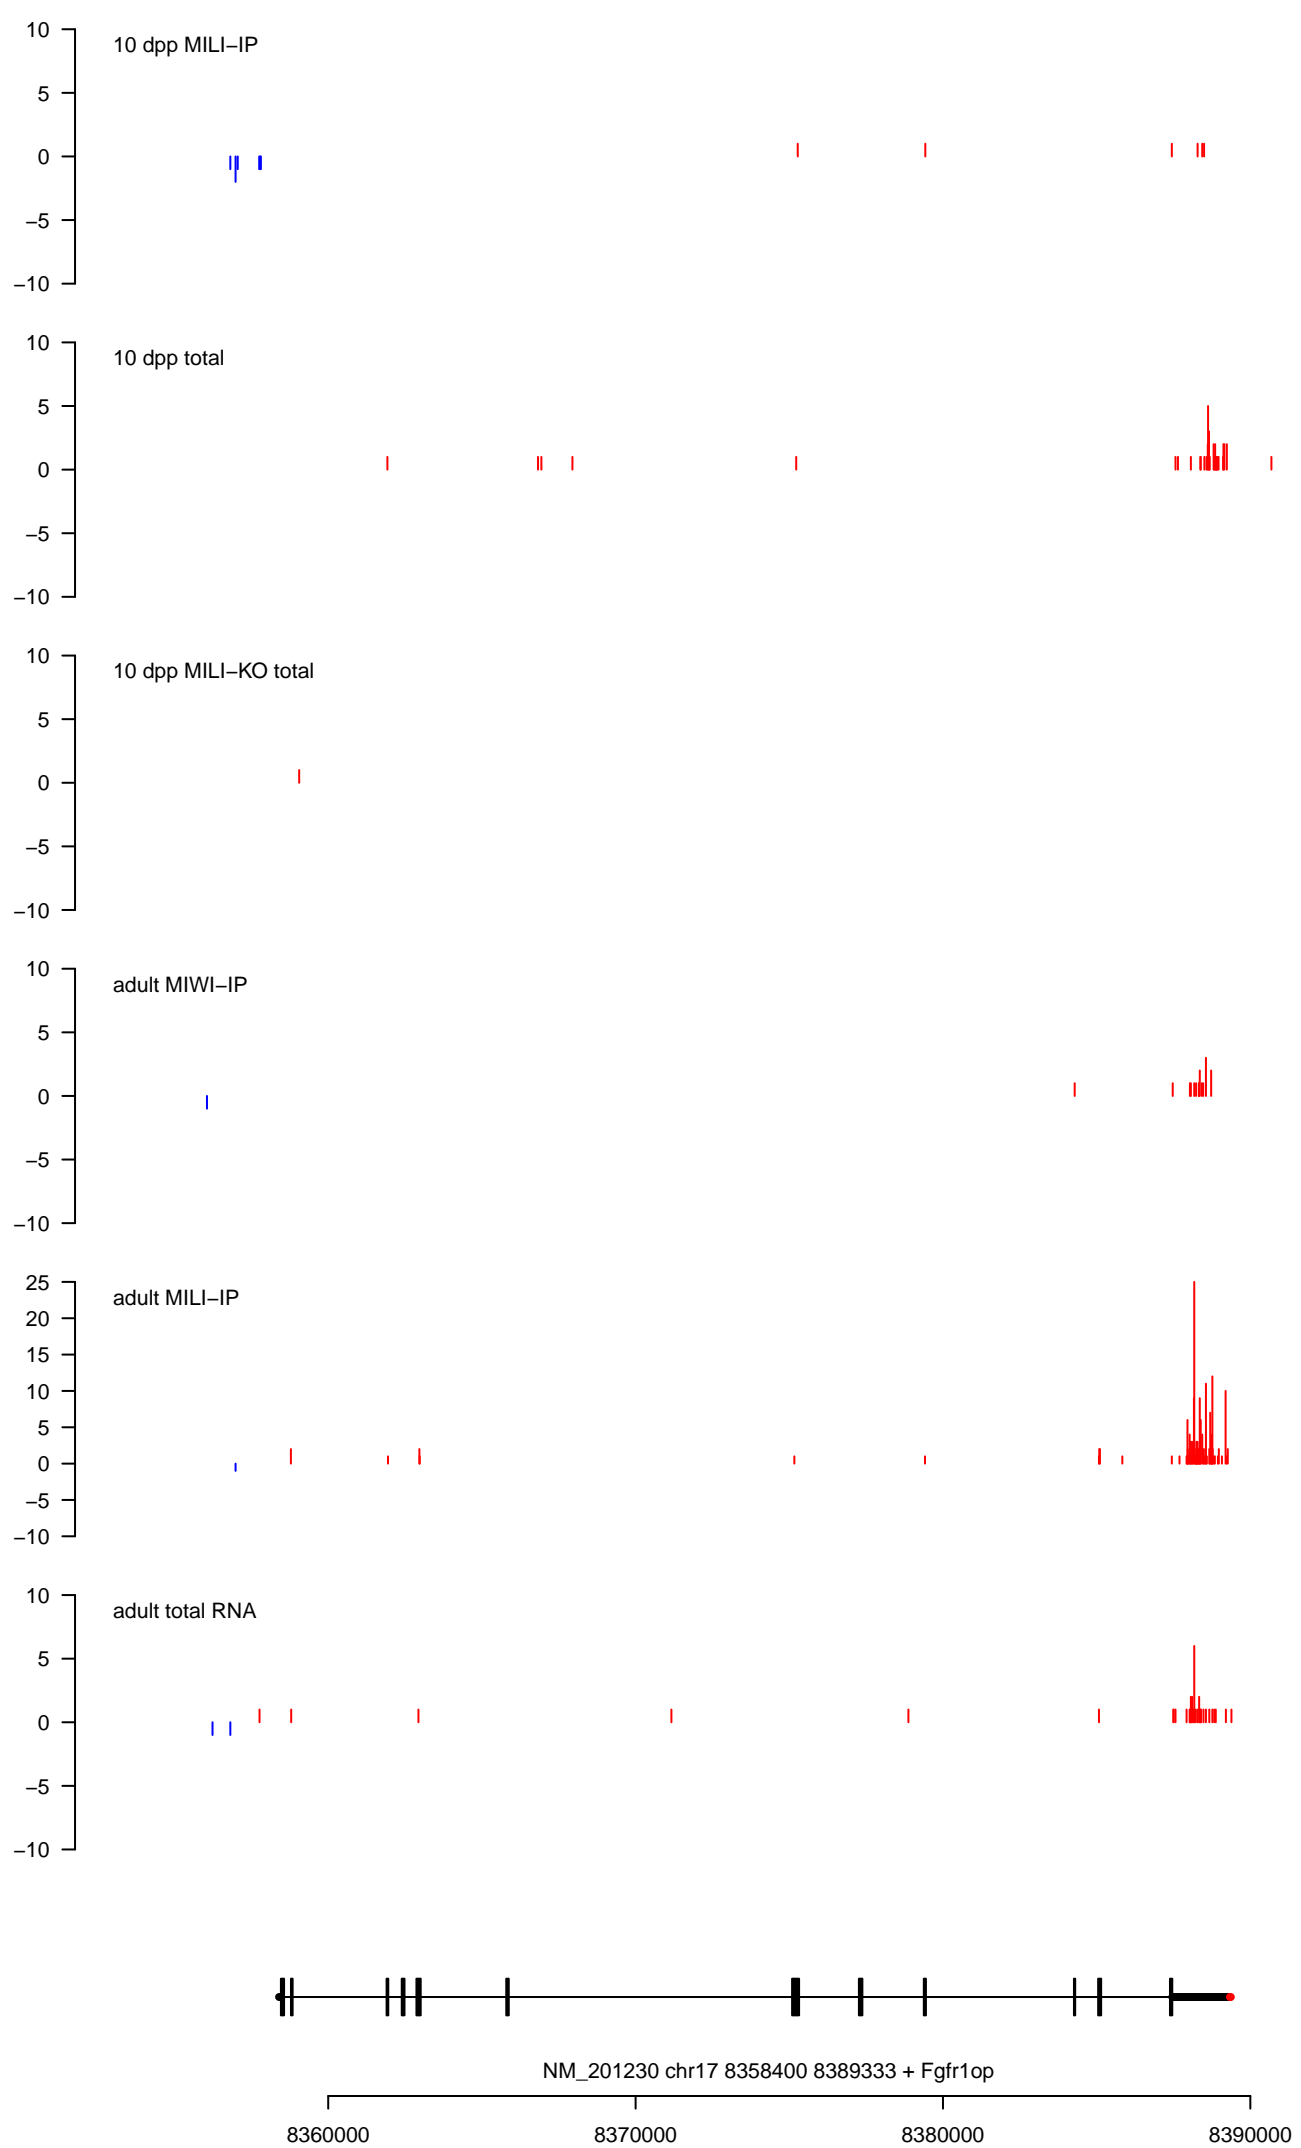



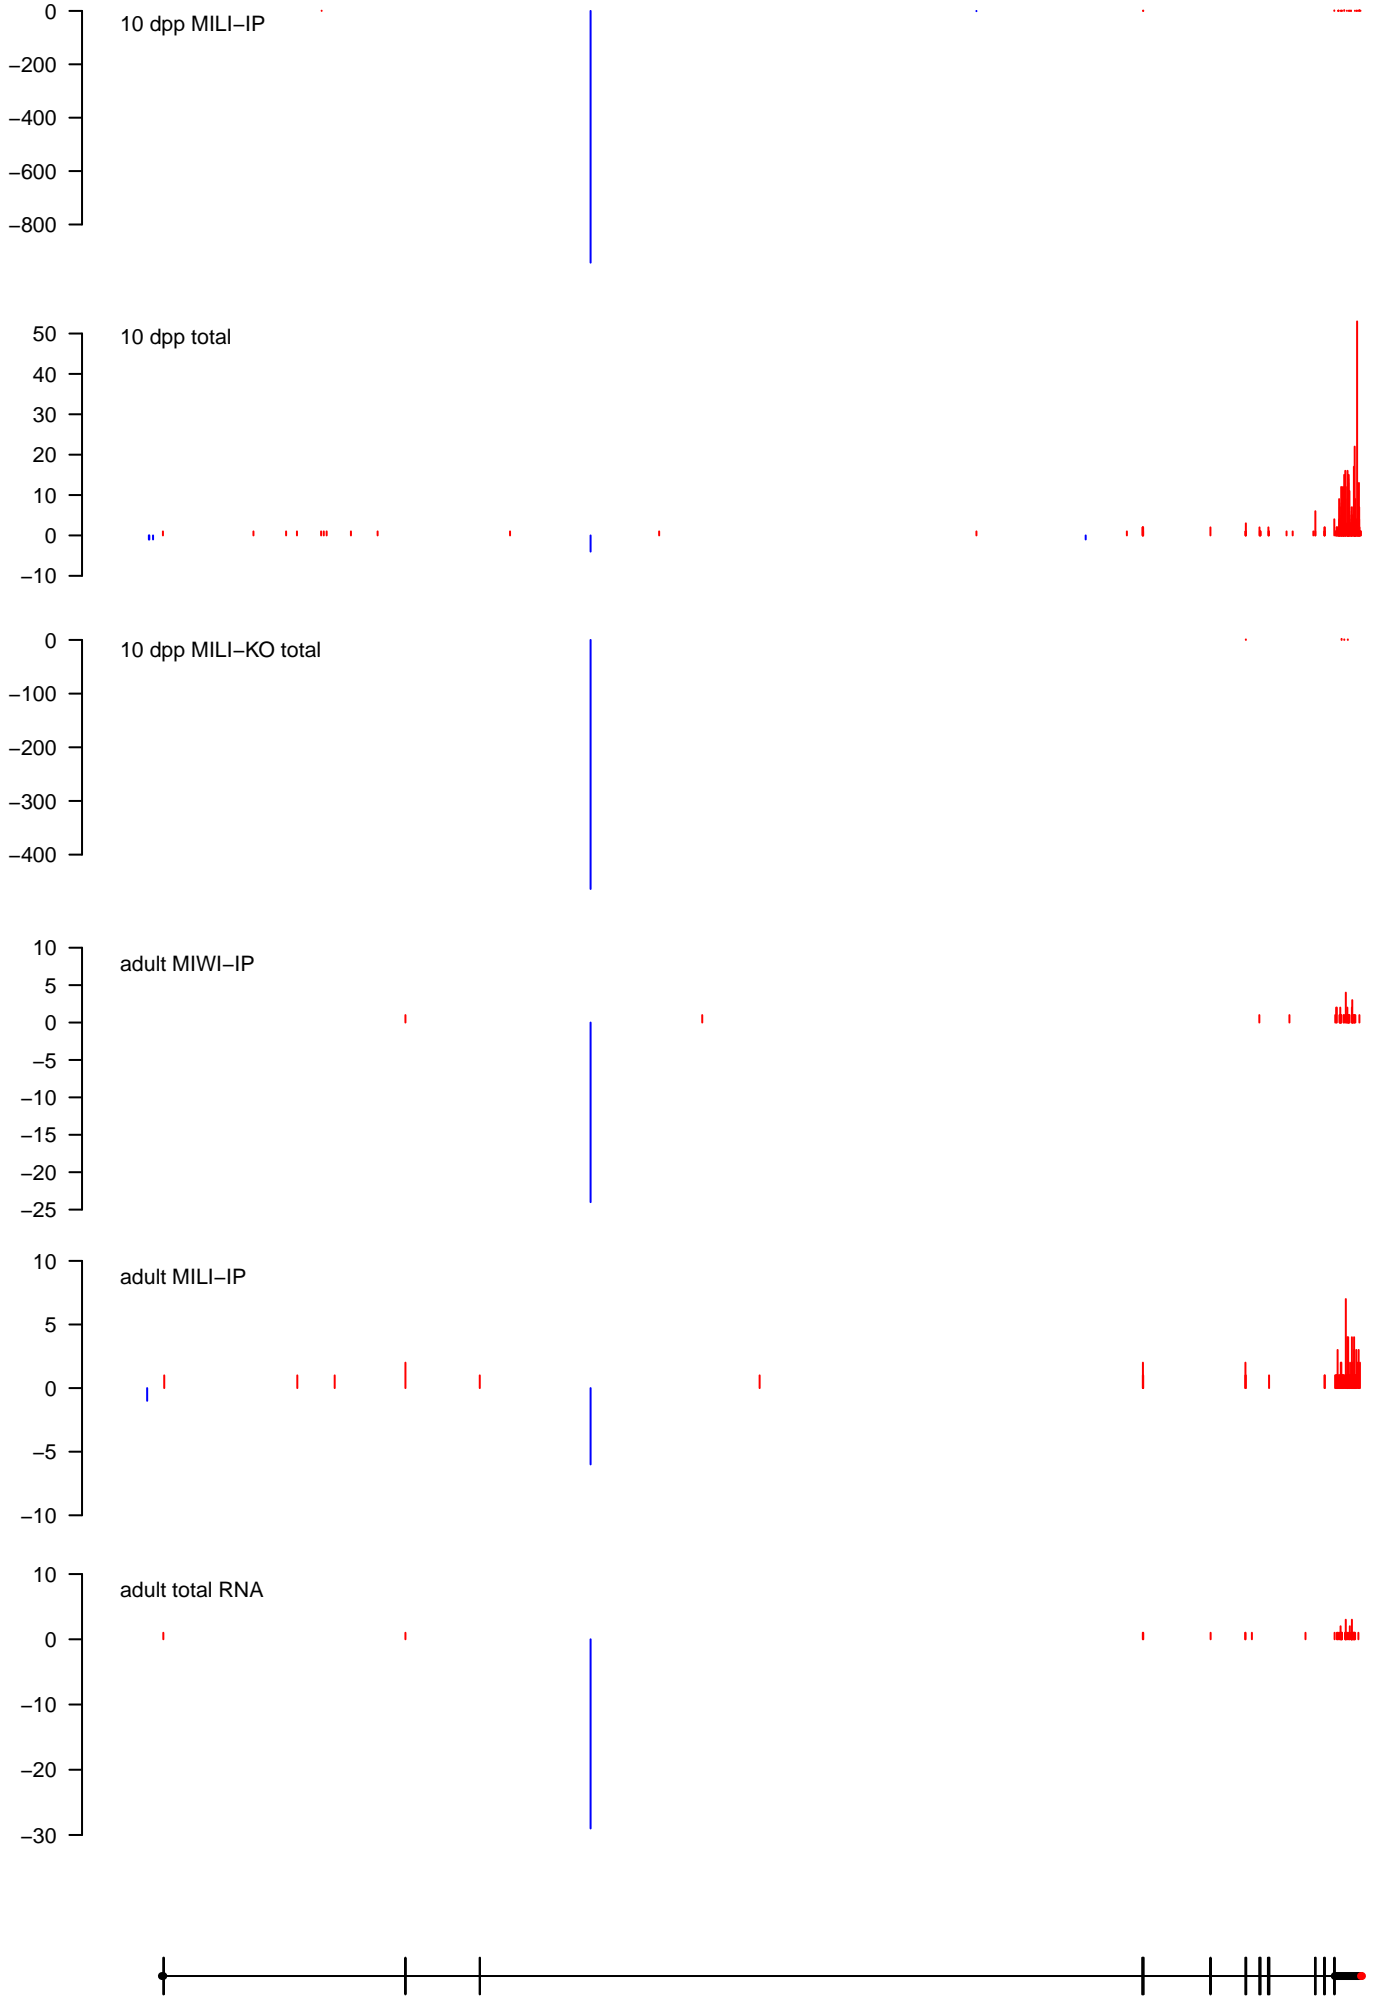

NM\_010264 chr2 38578894 38781981 - Nr6a1  
 38600000 38650000 38700000 38750000

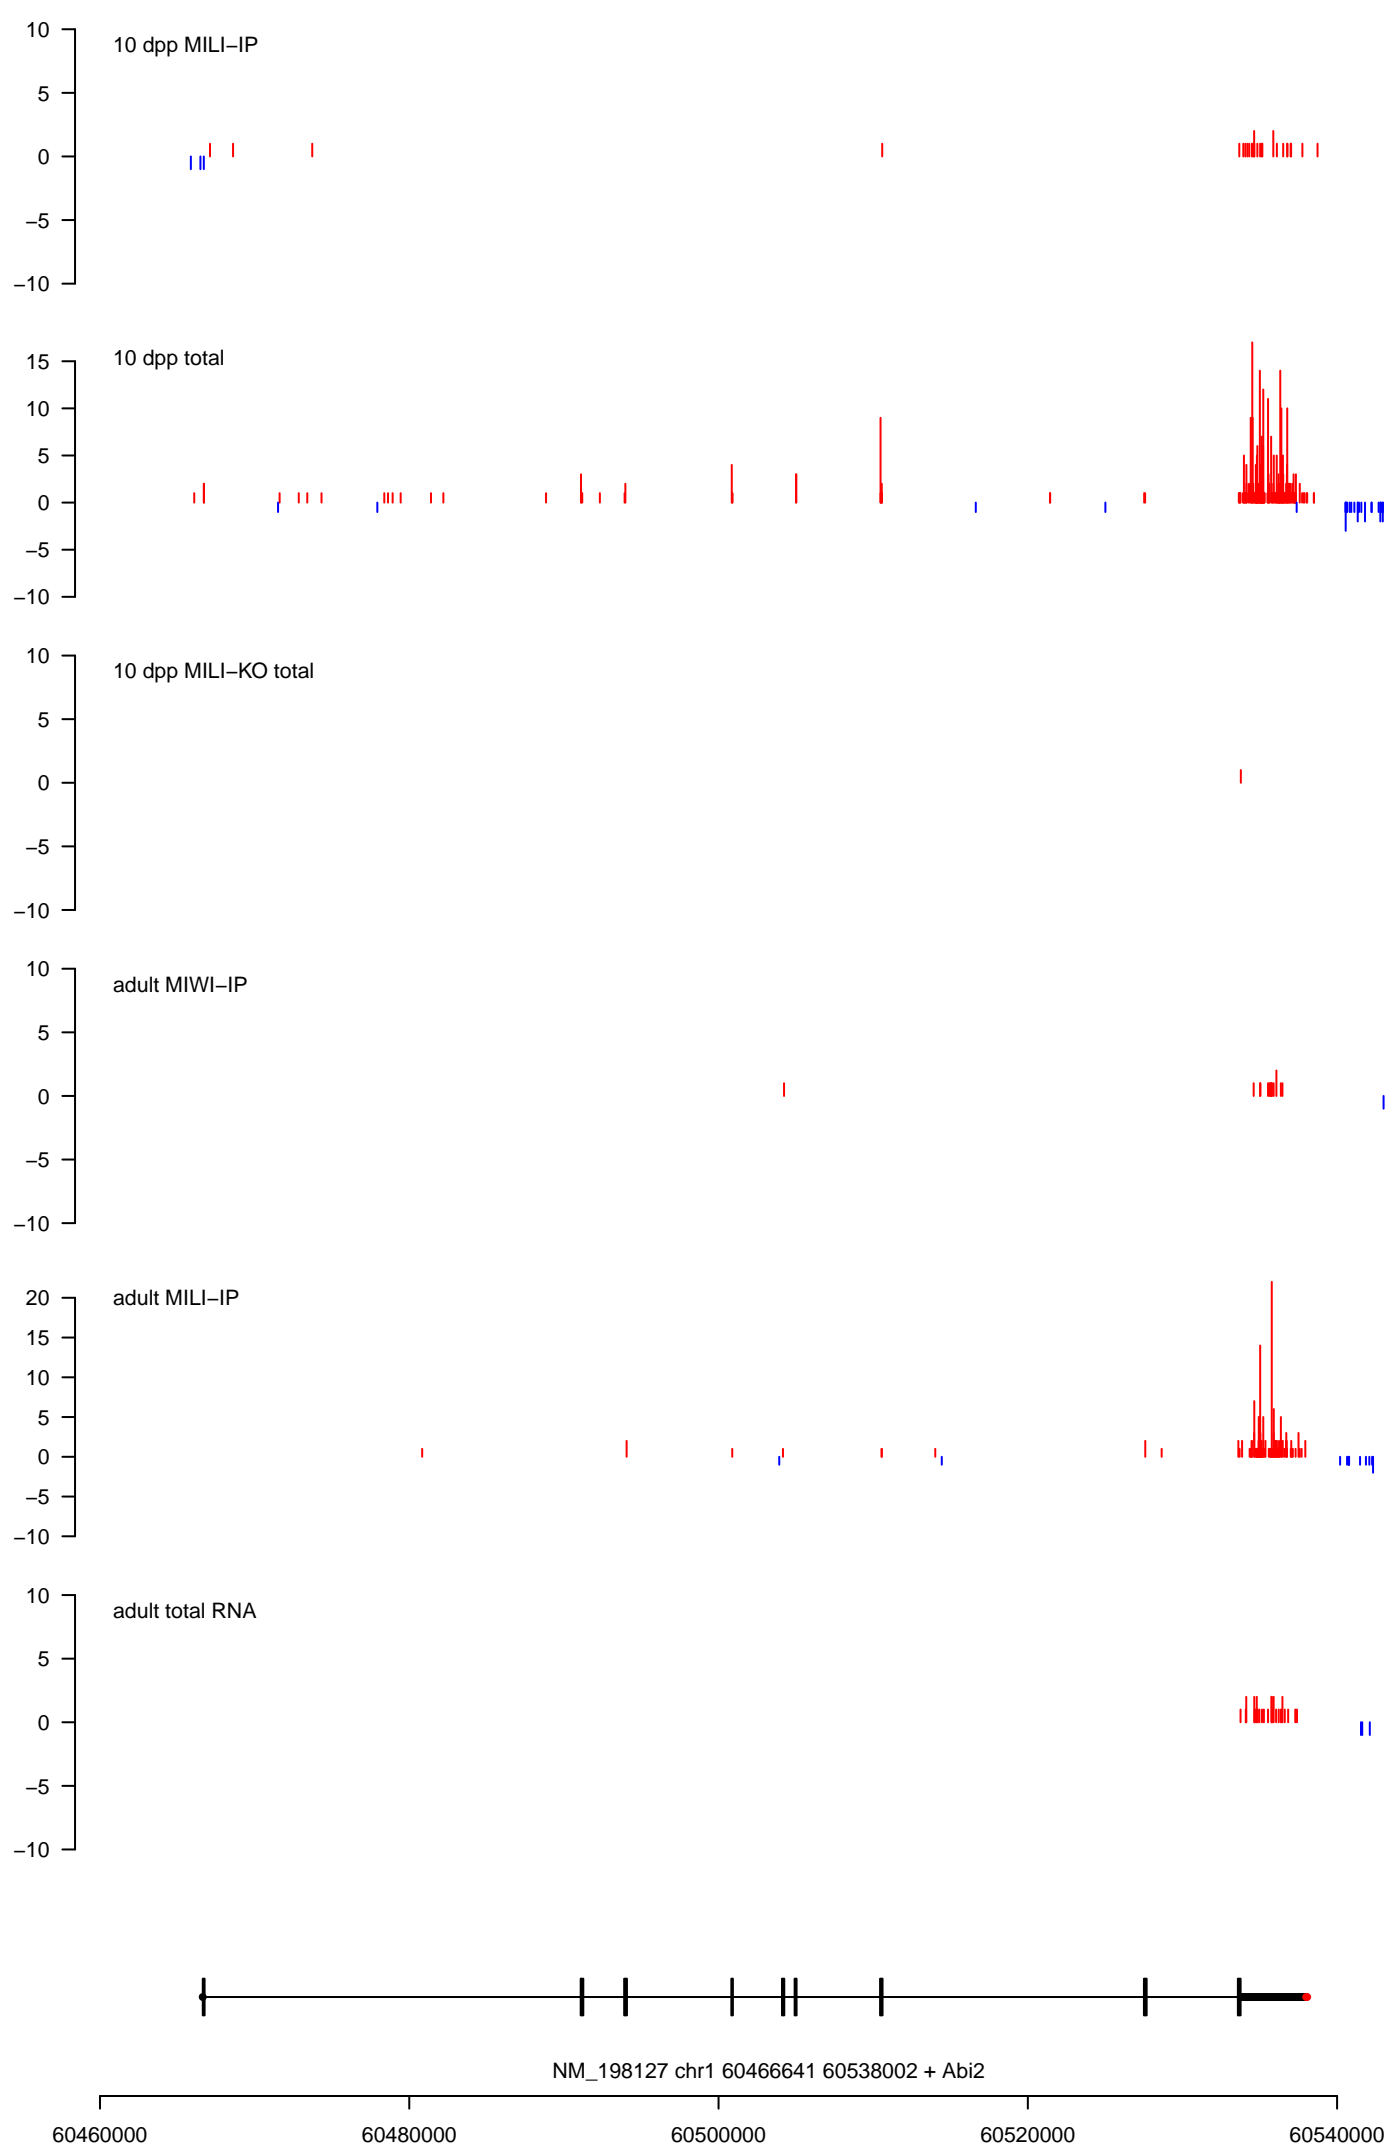

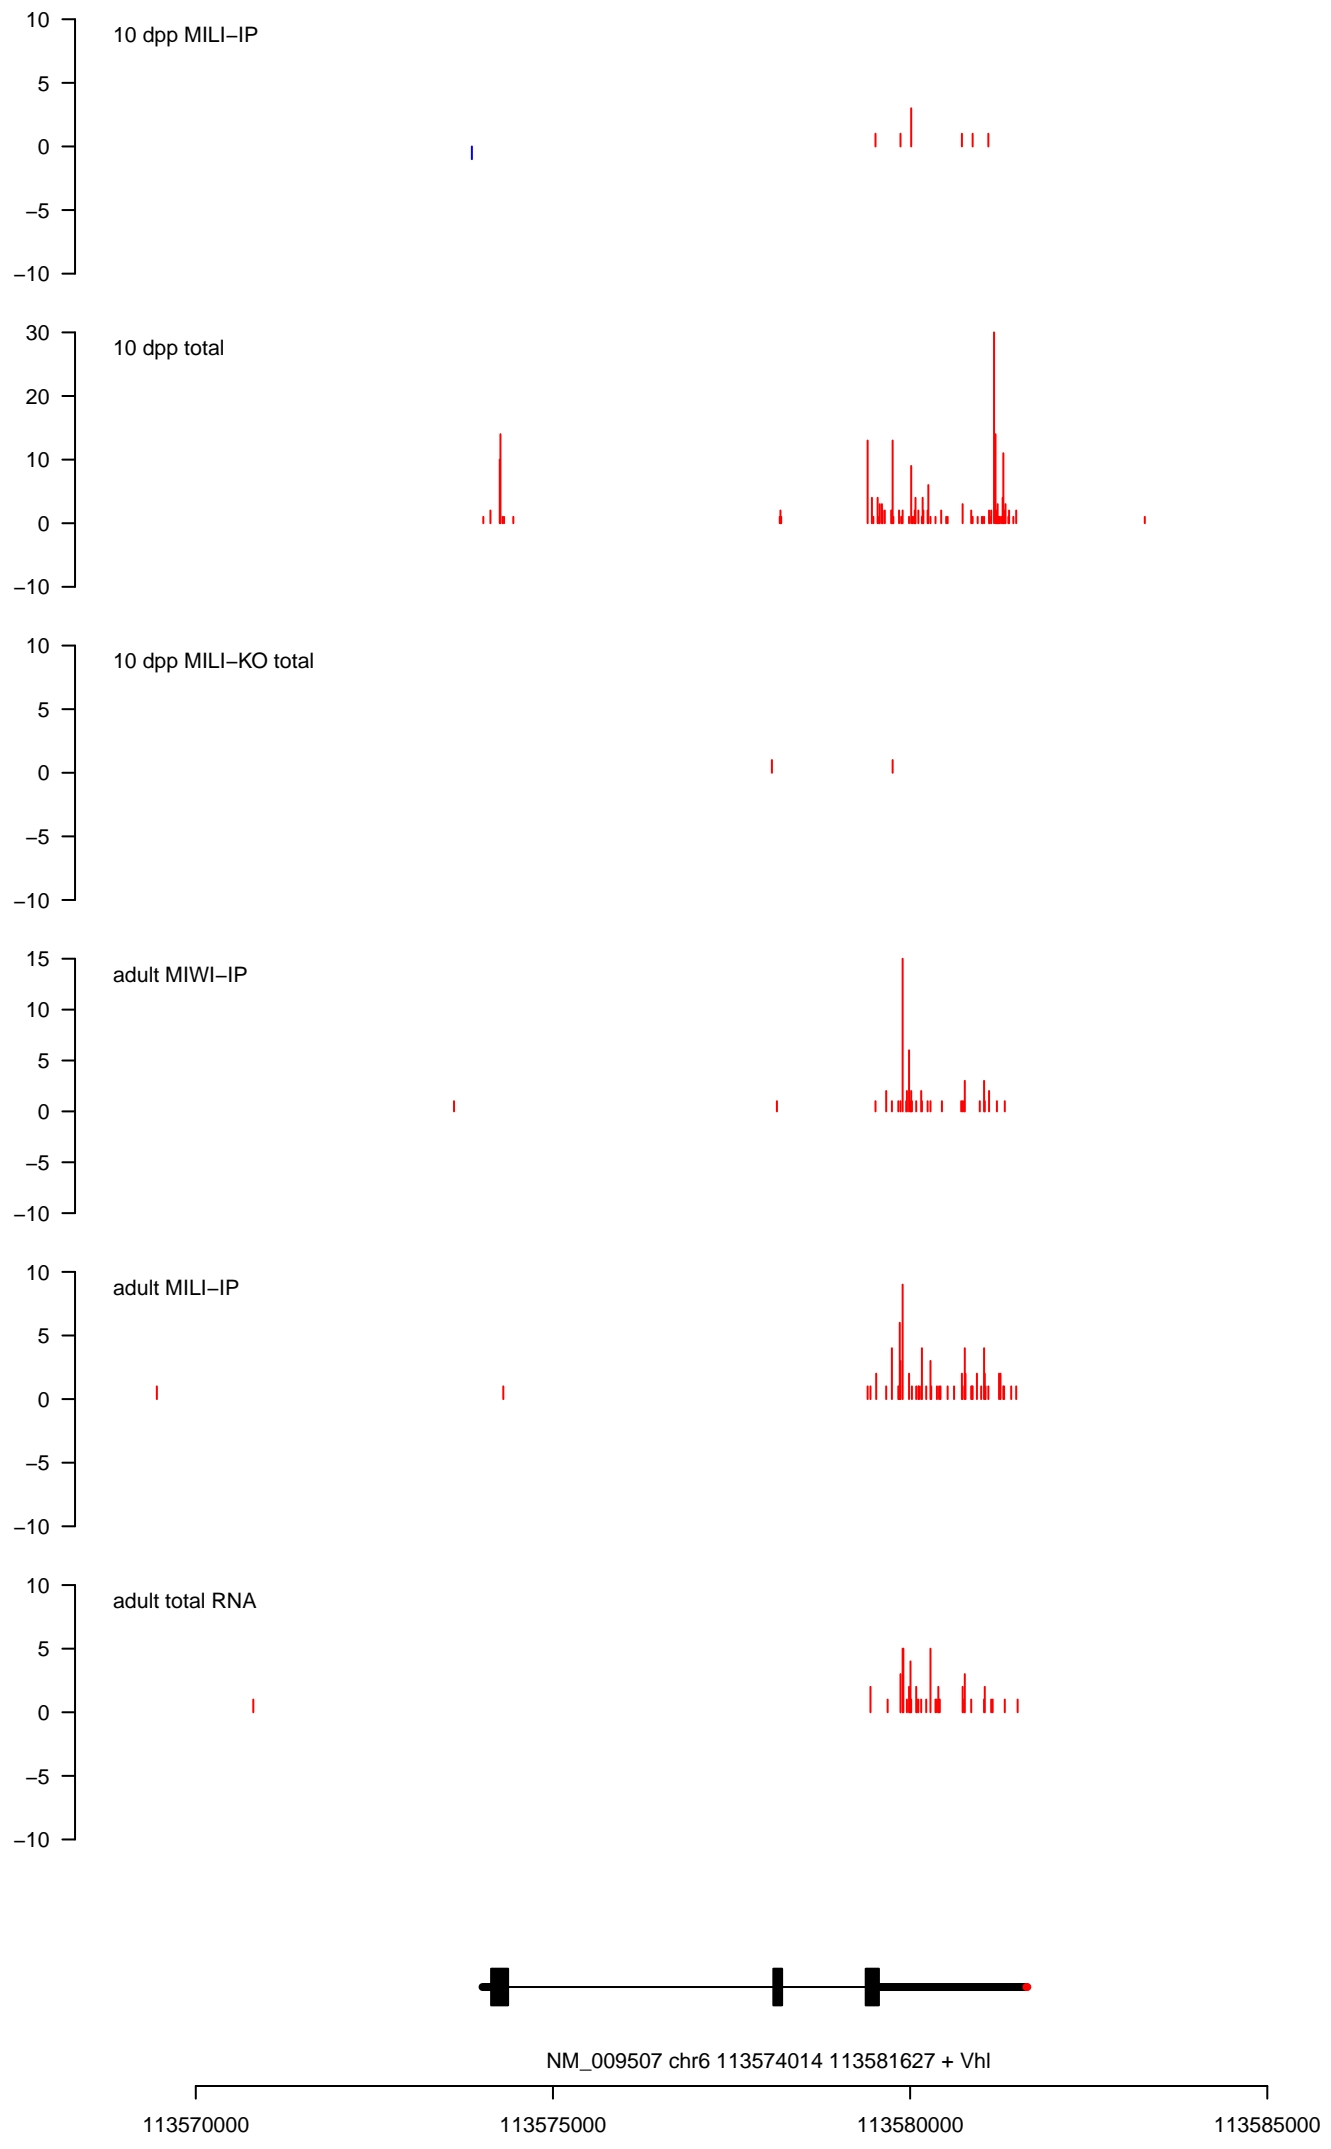

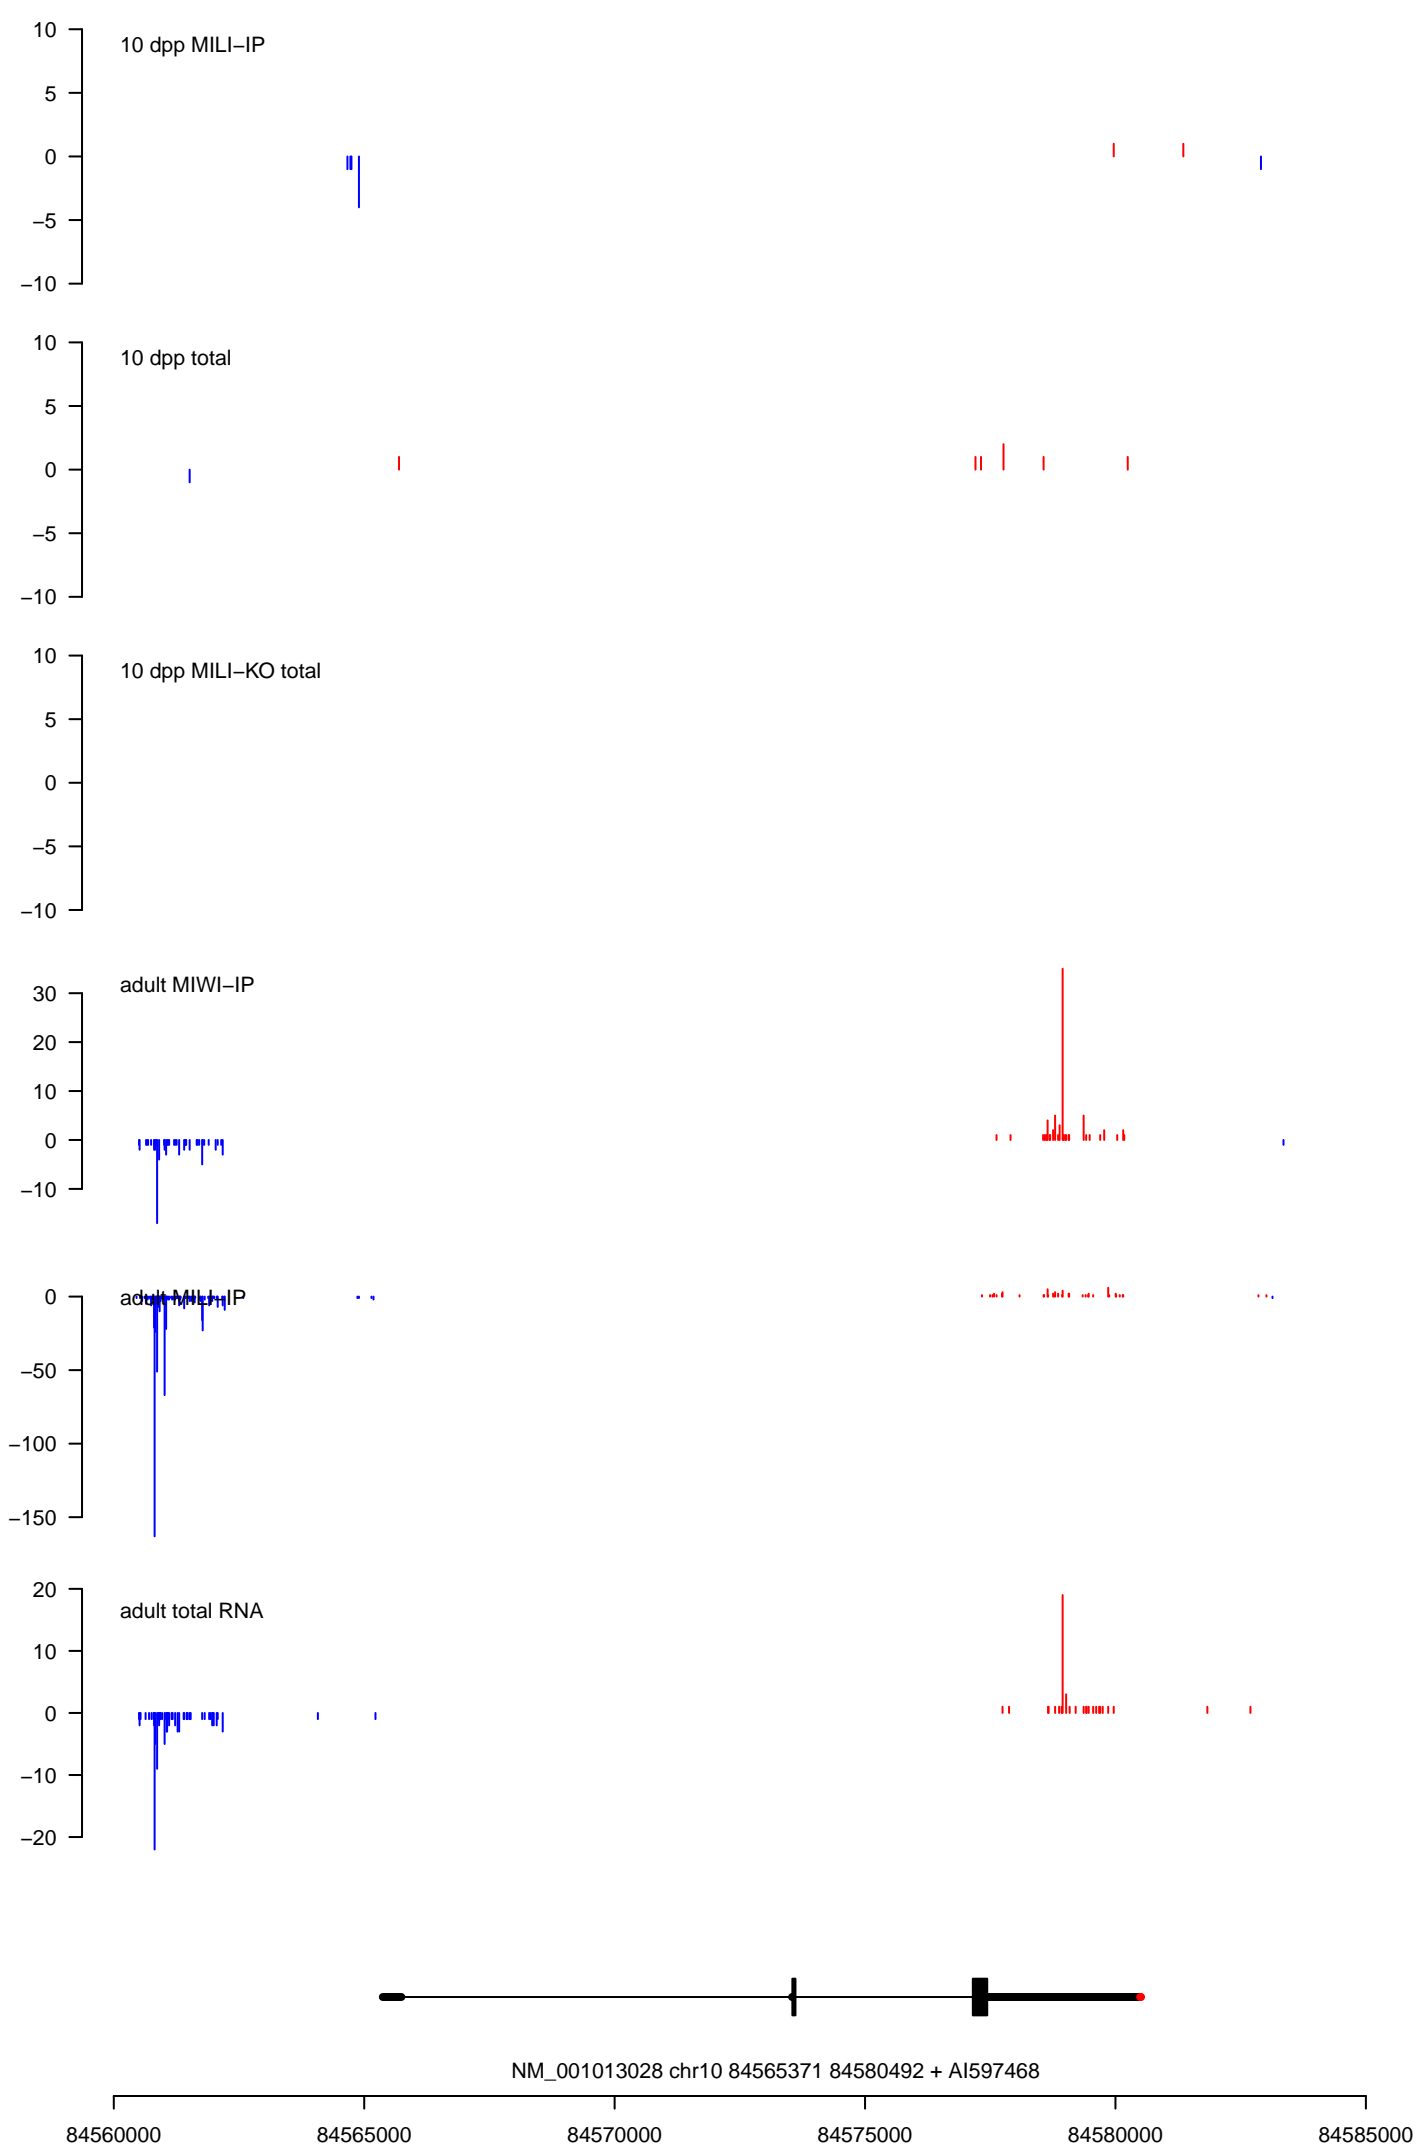

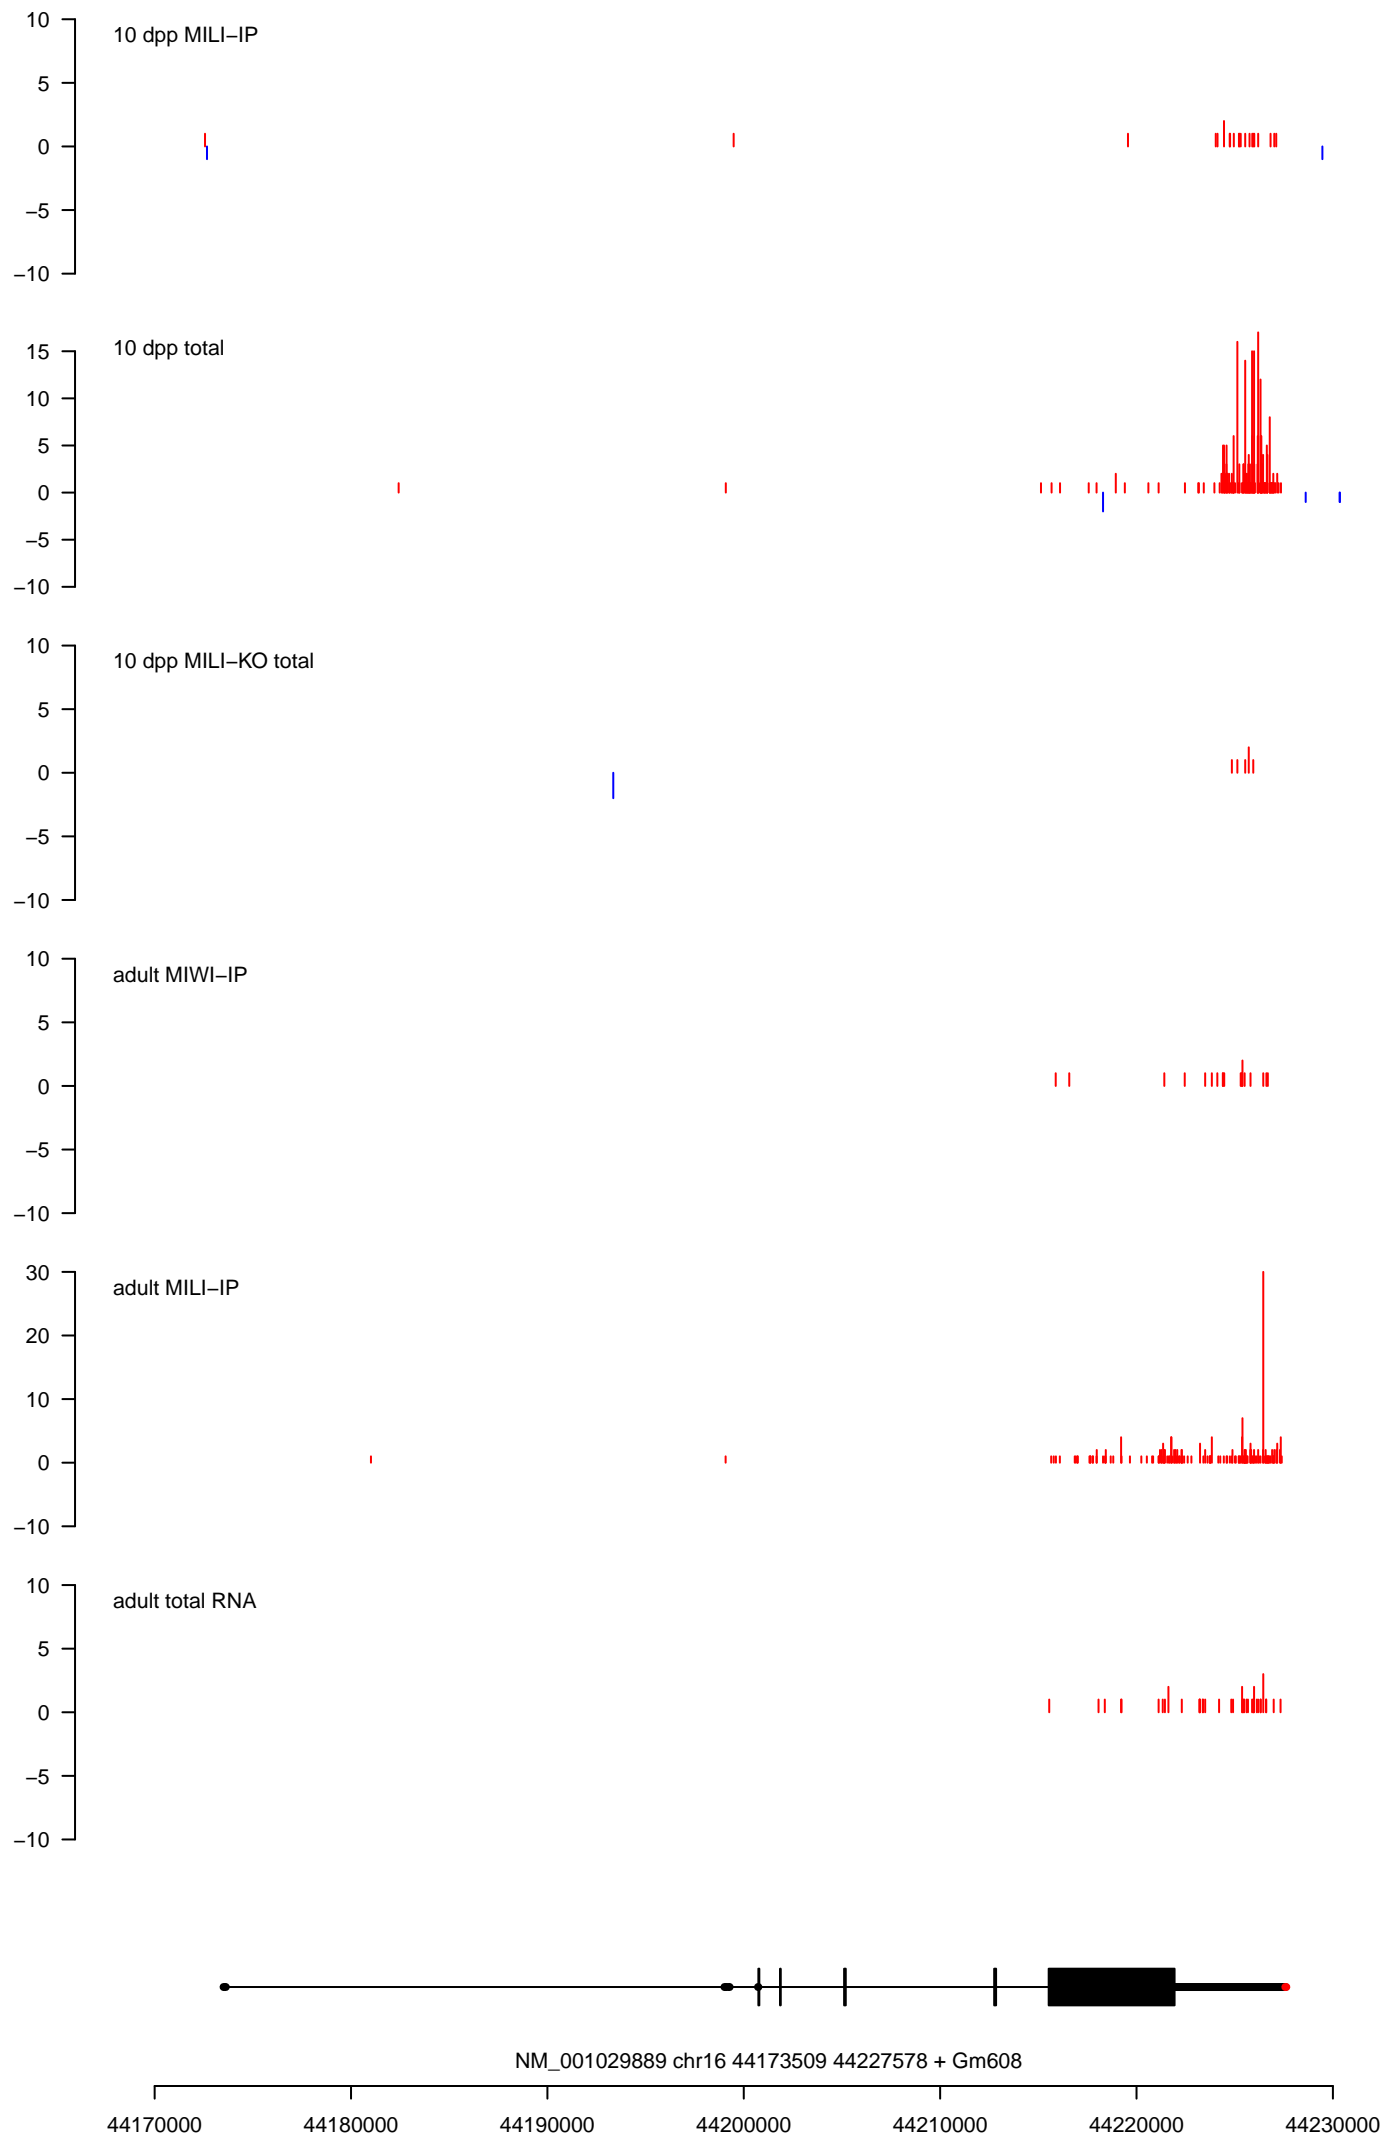

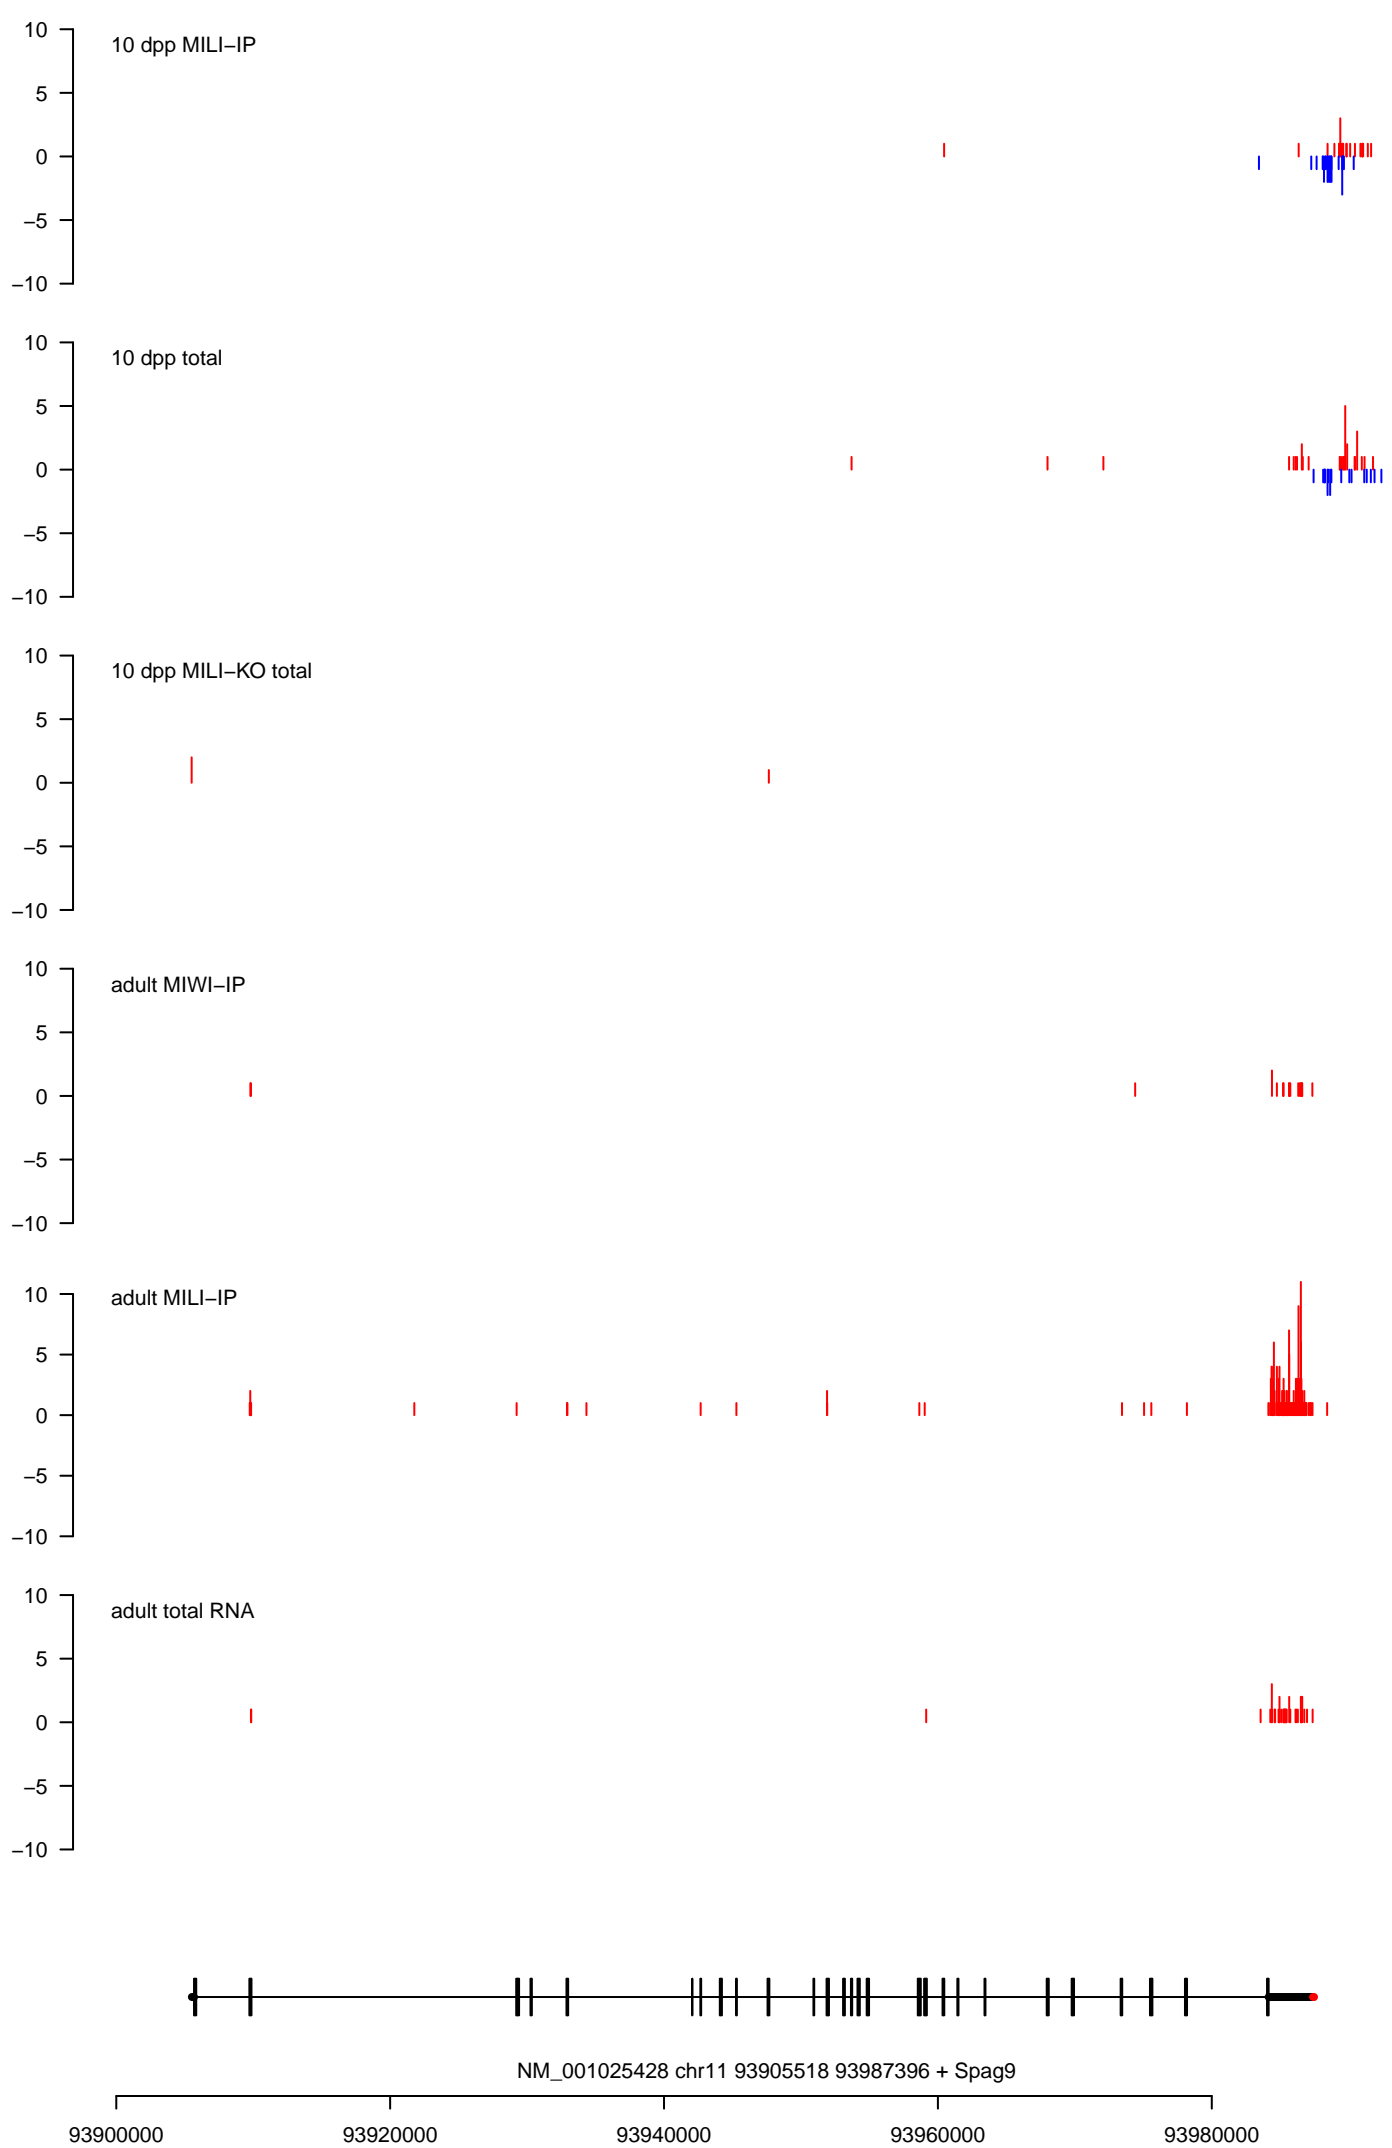



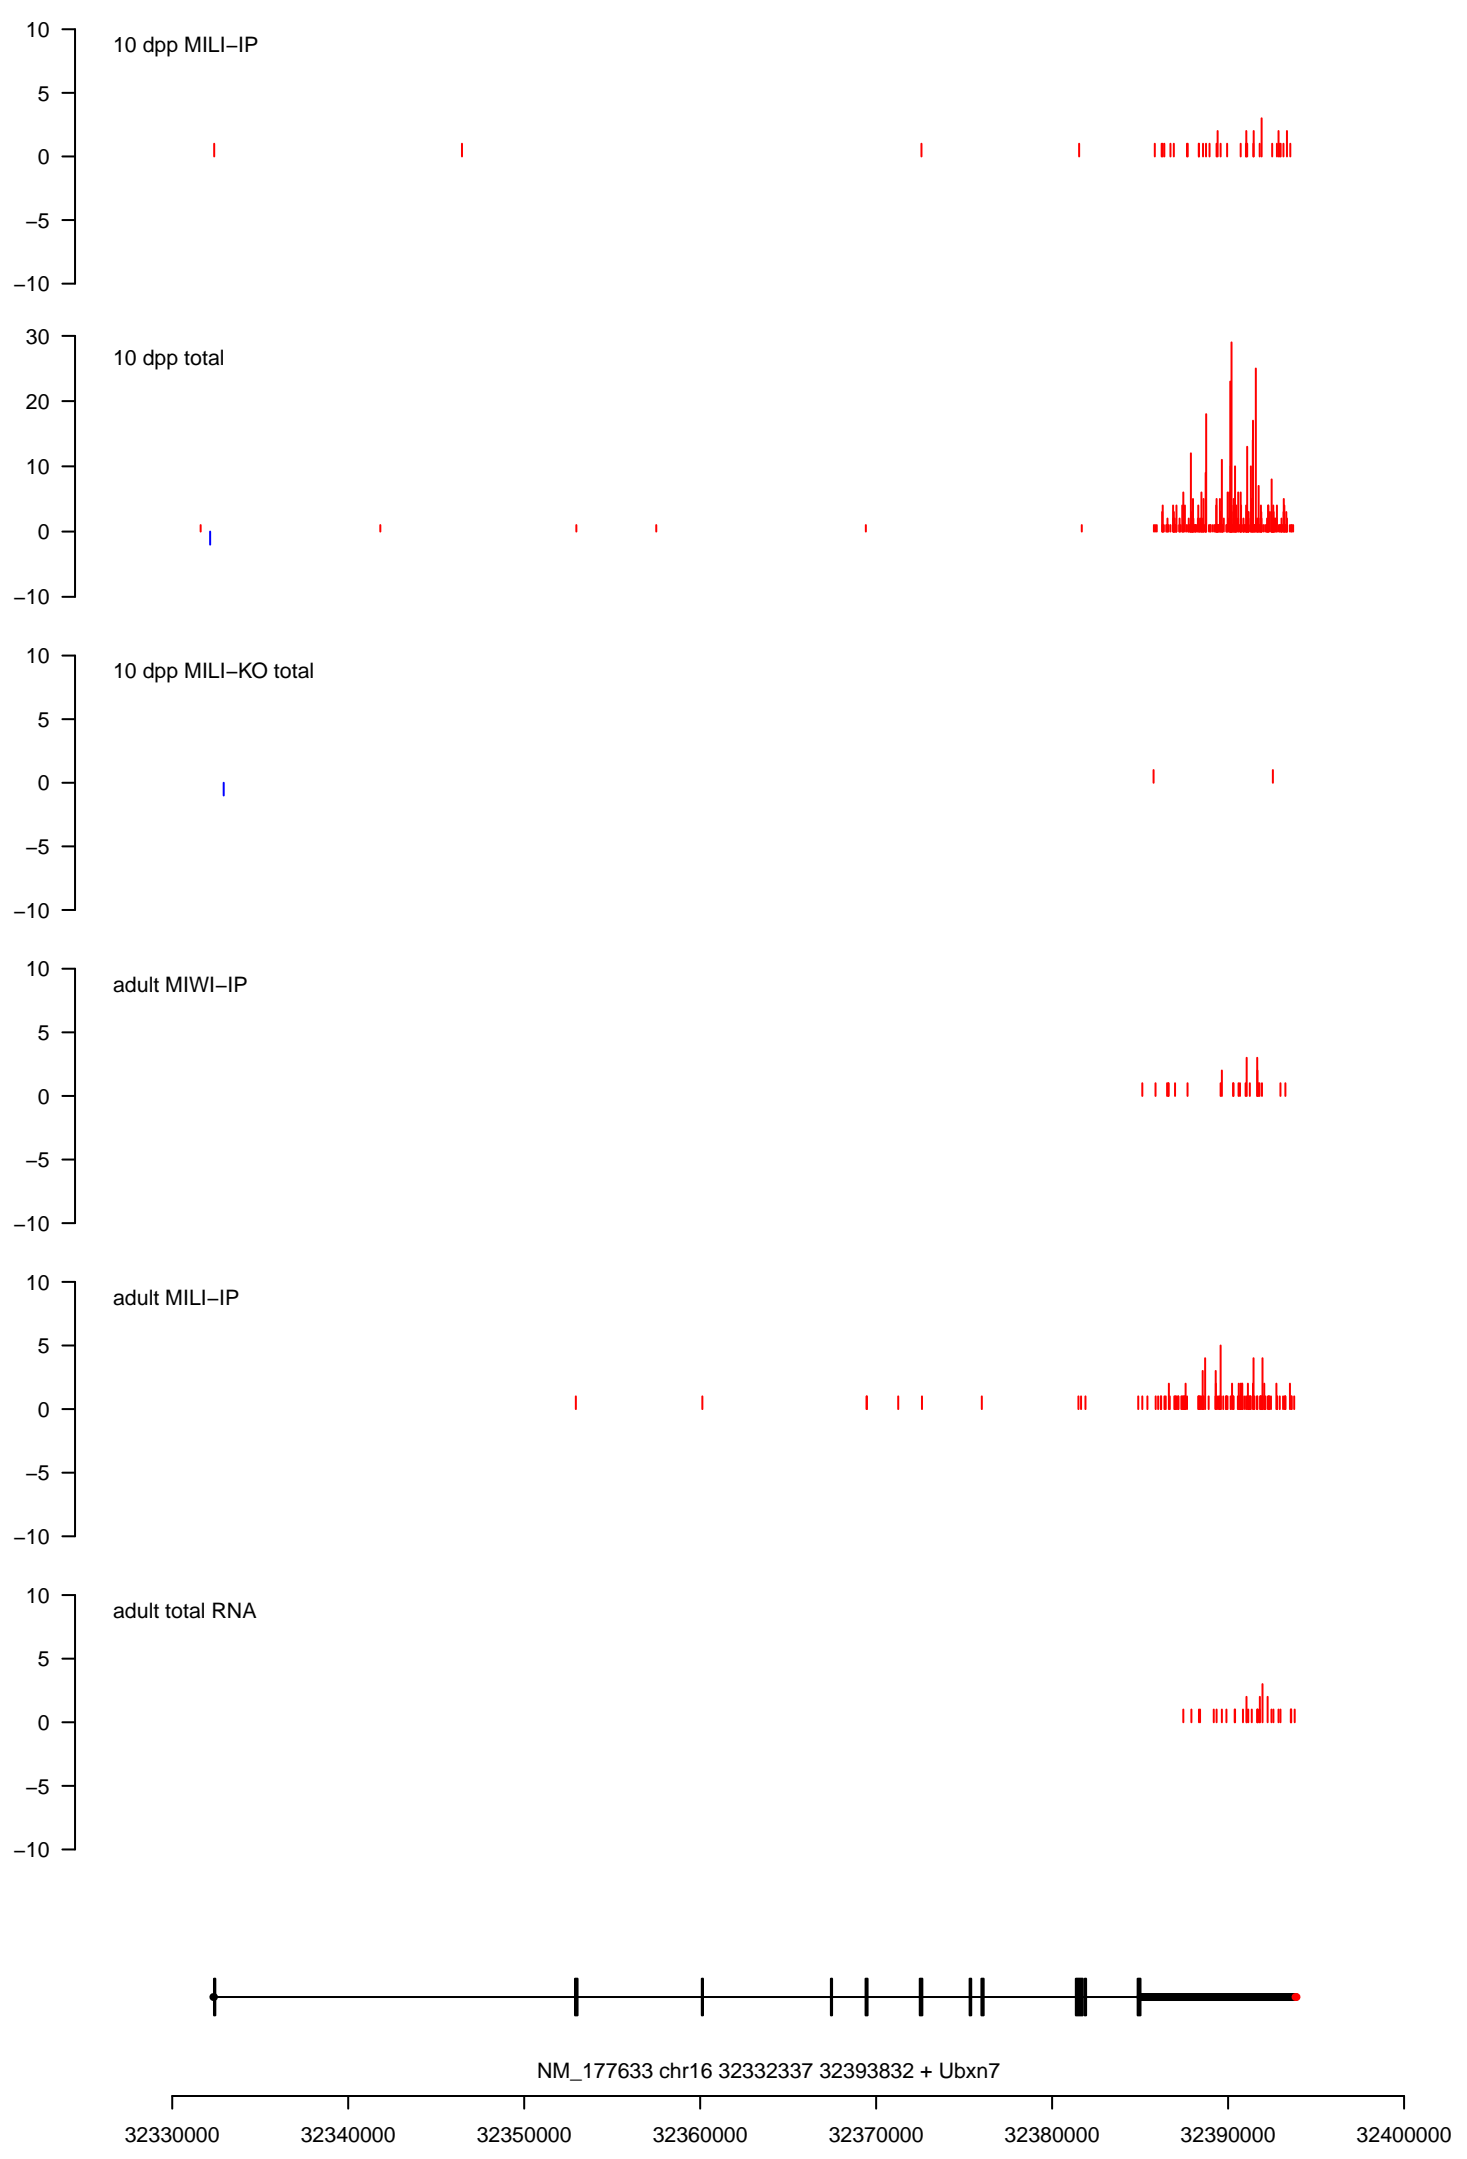



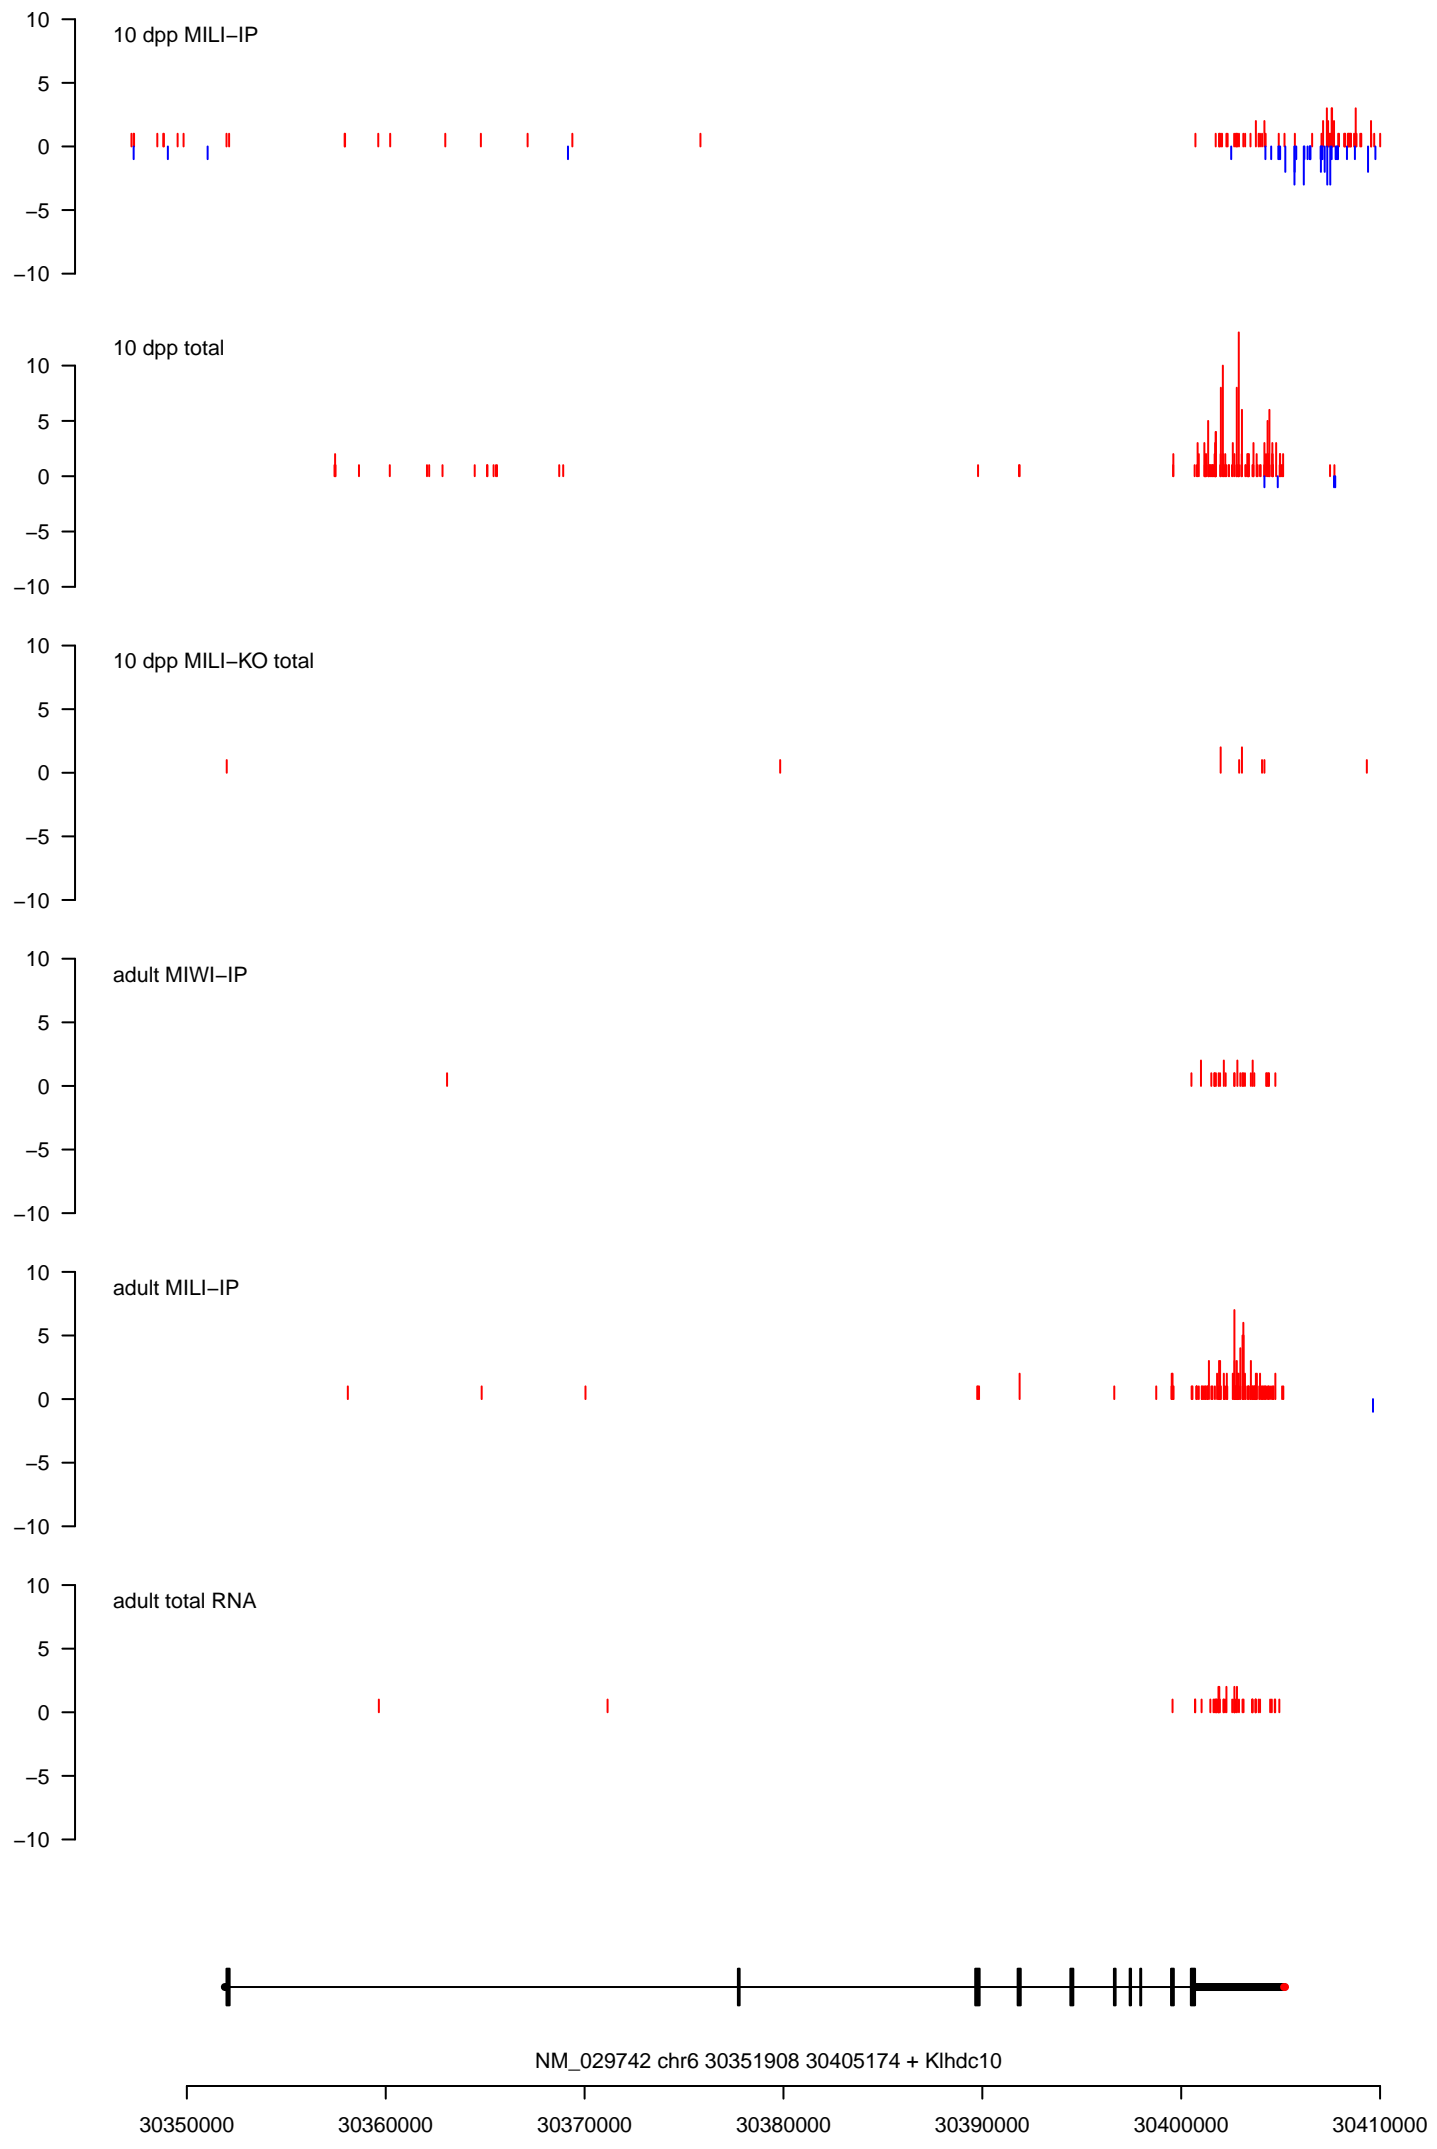

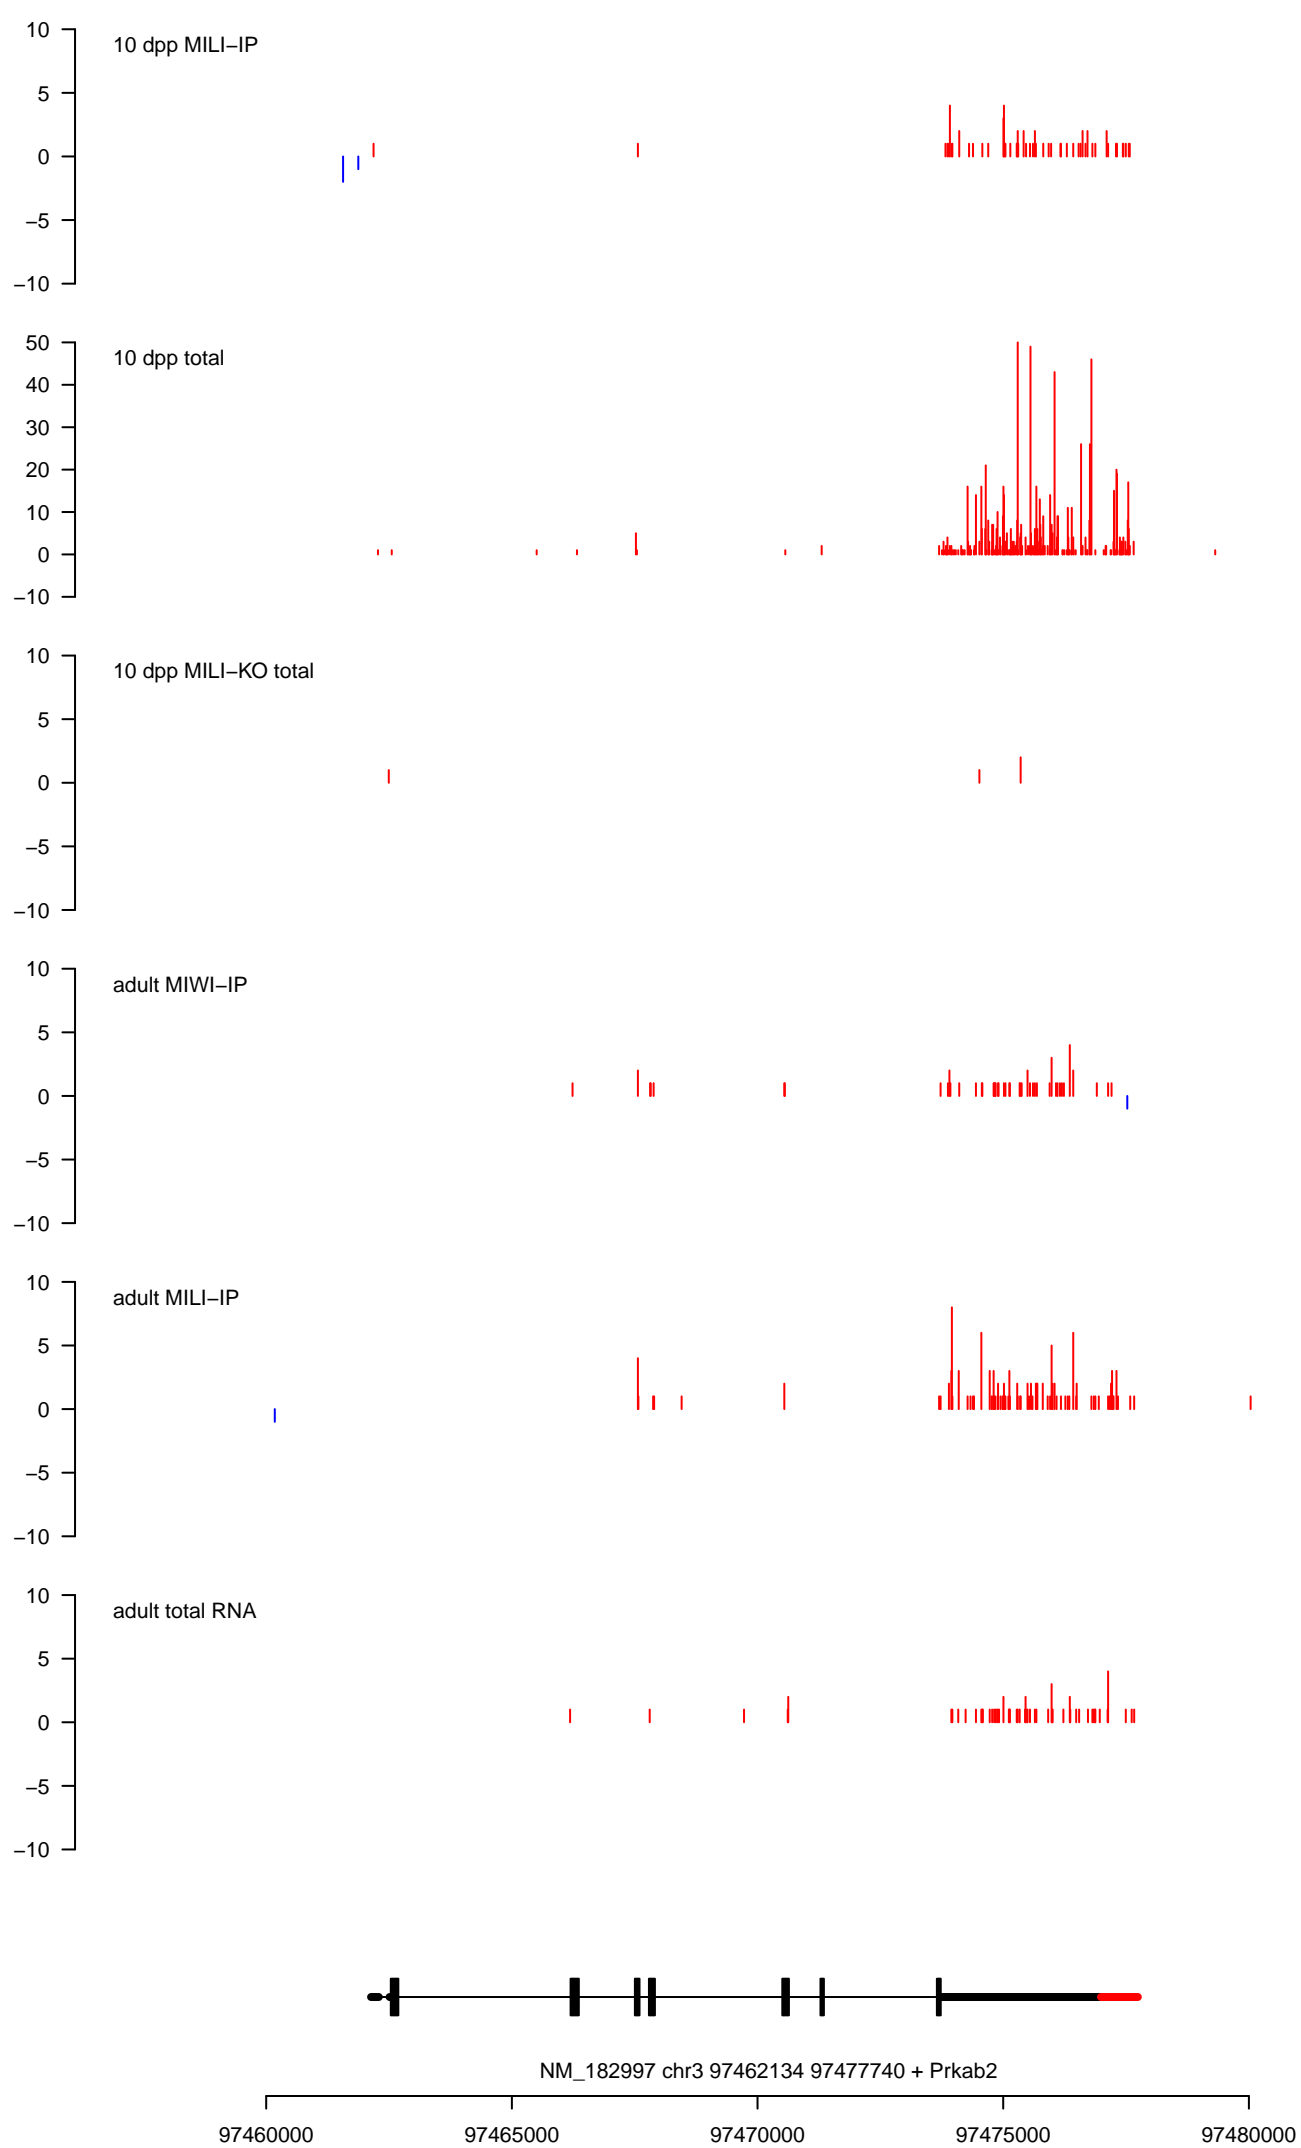

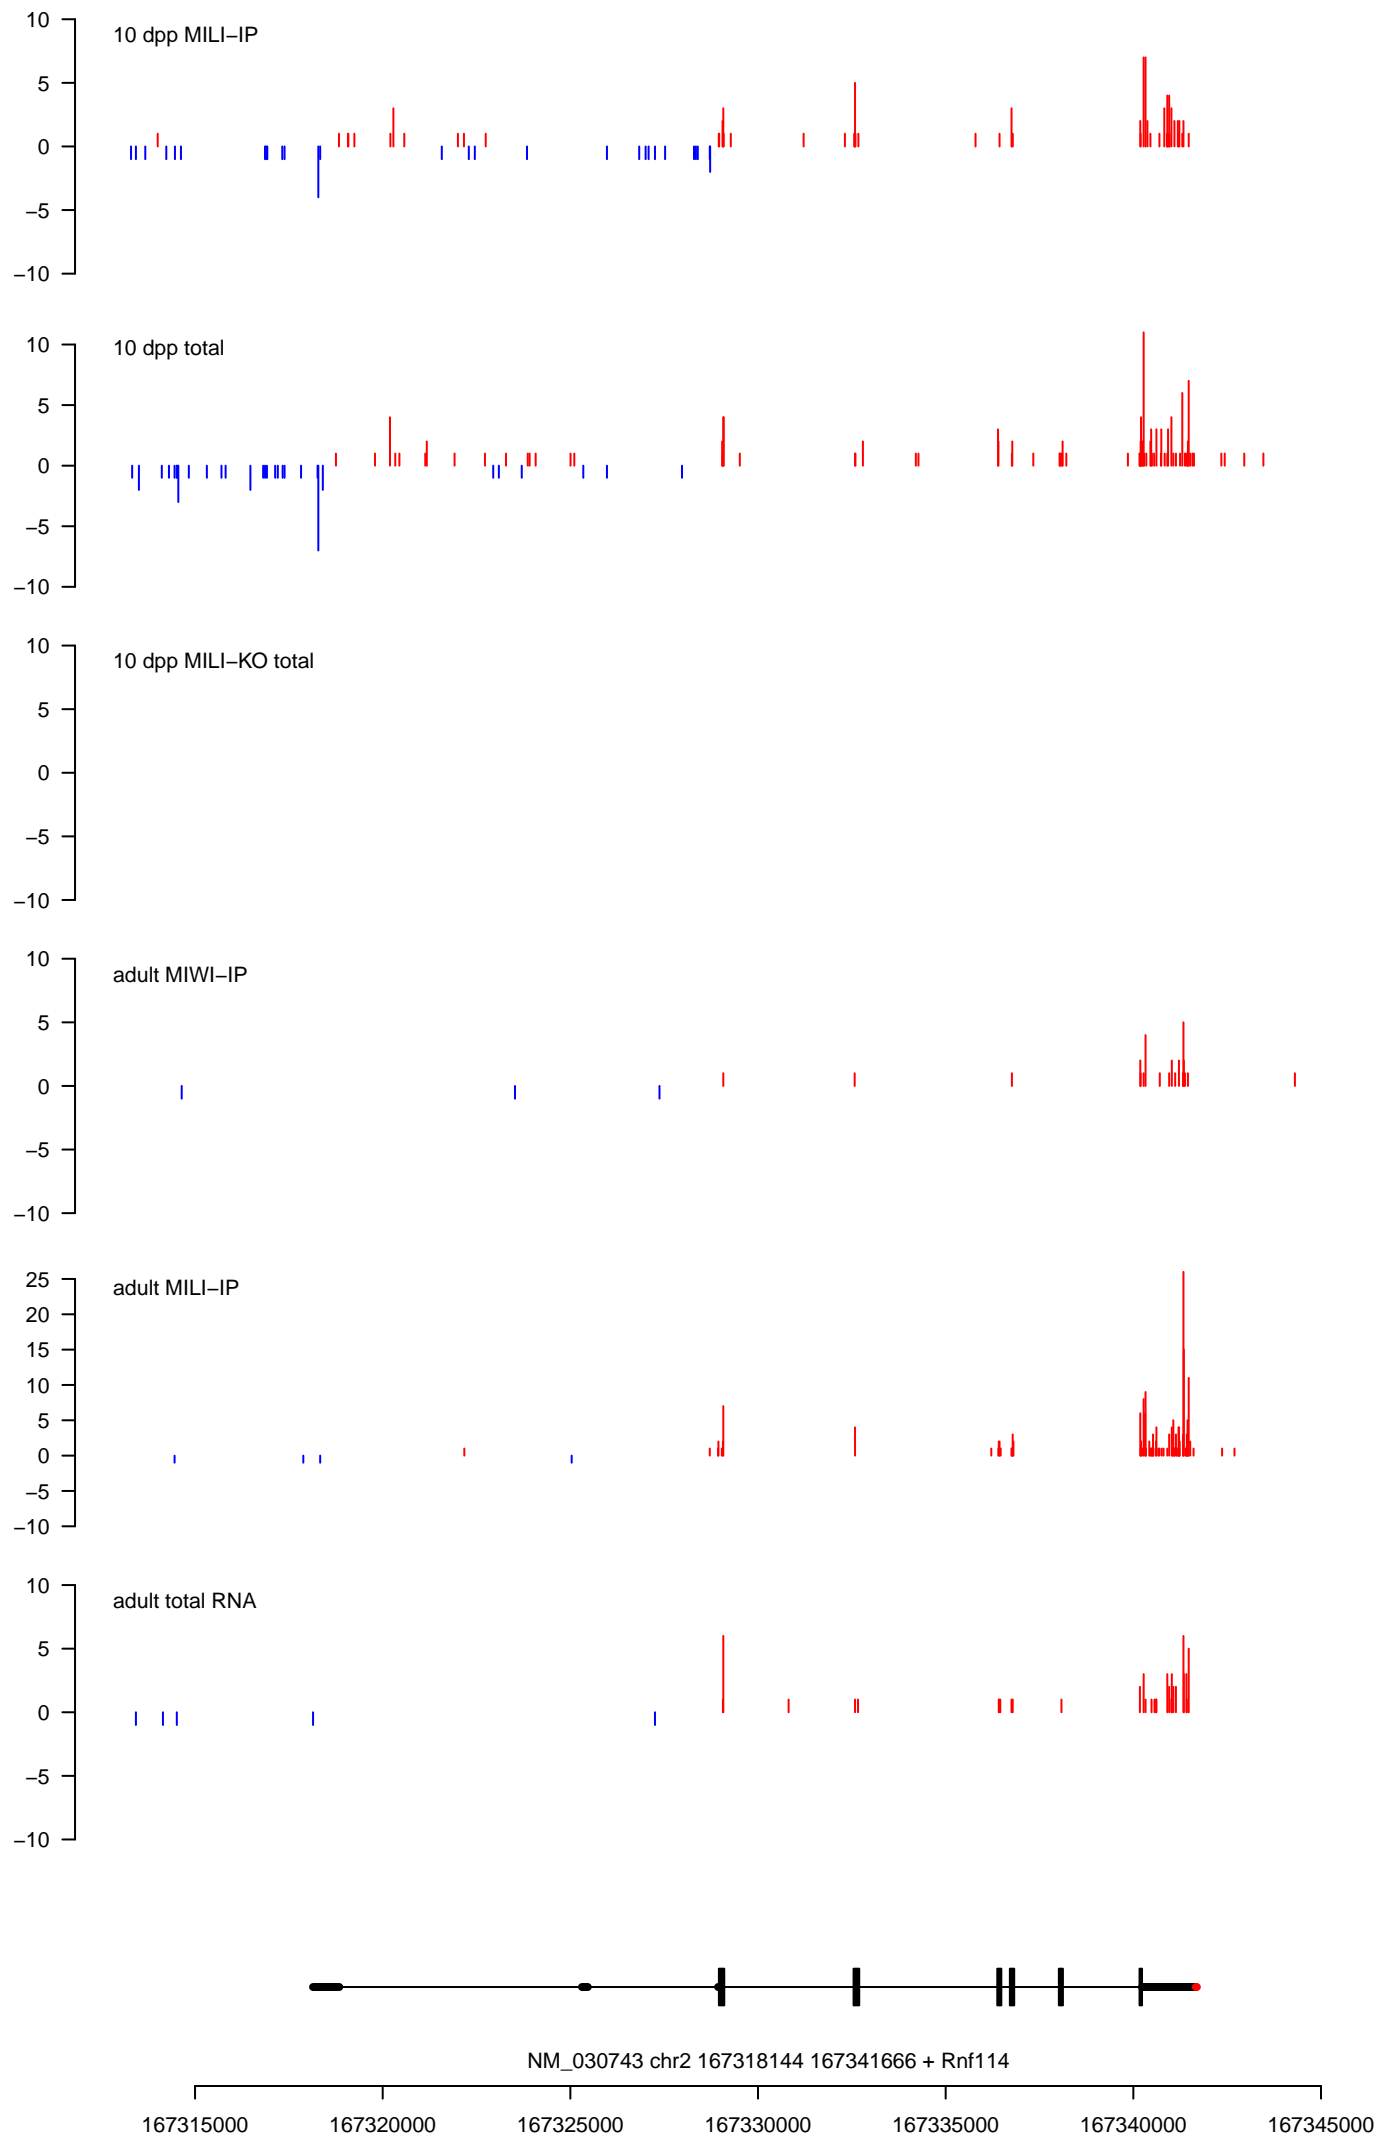

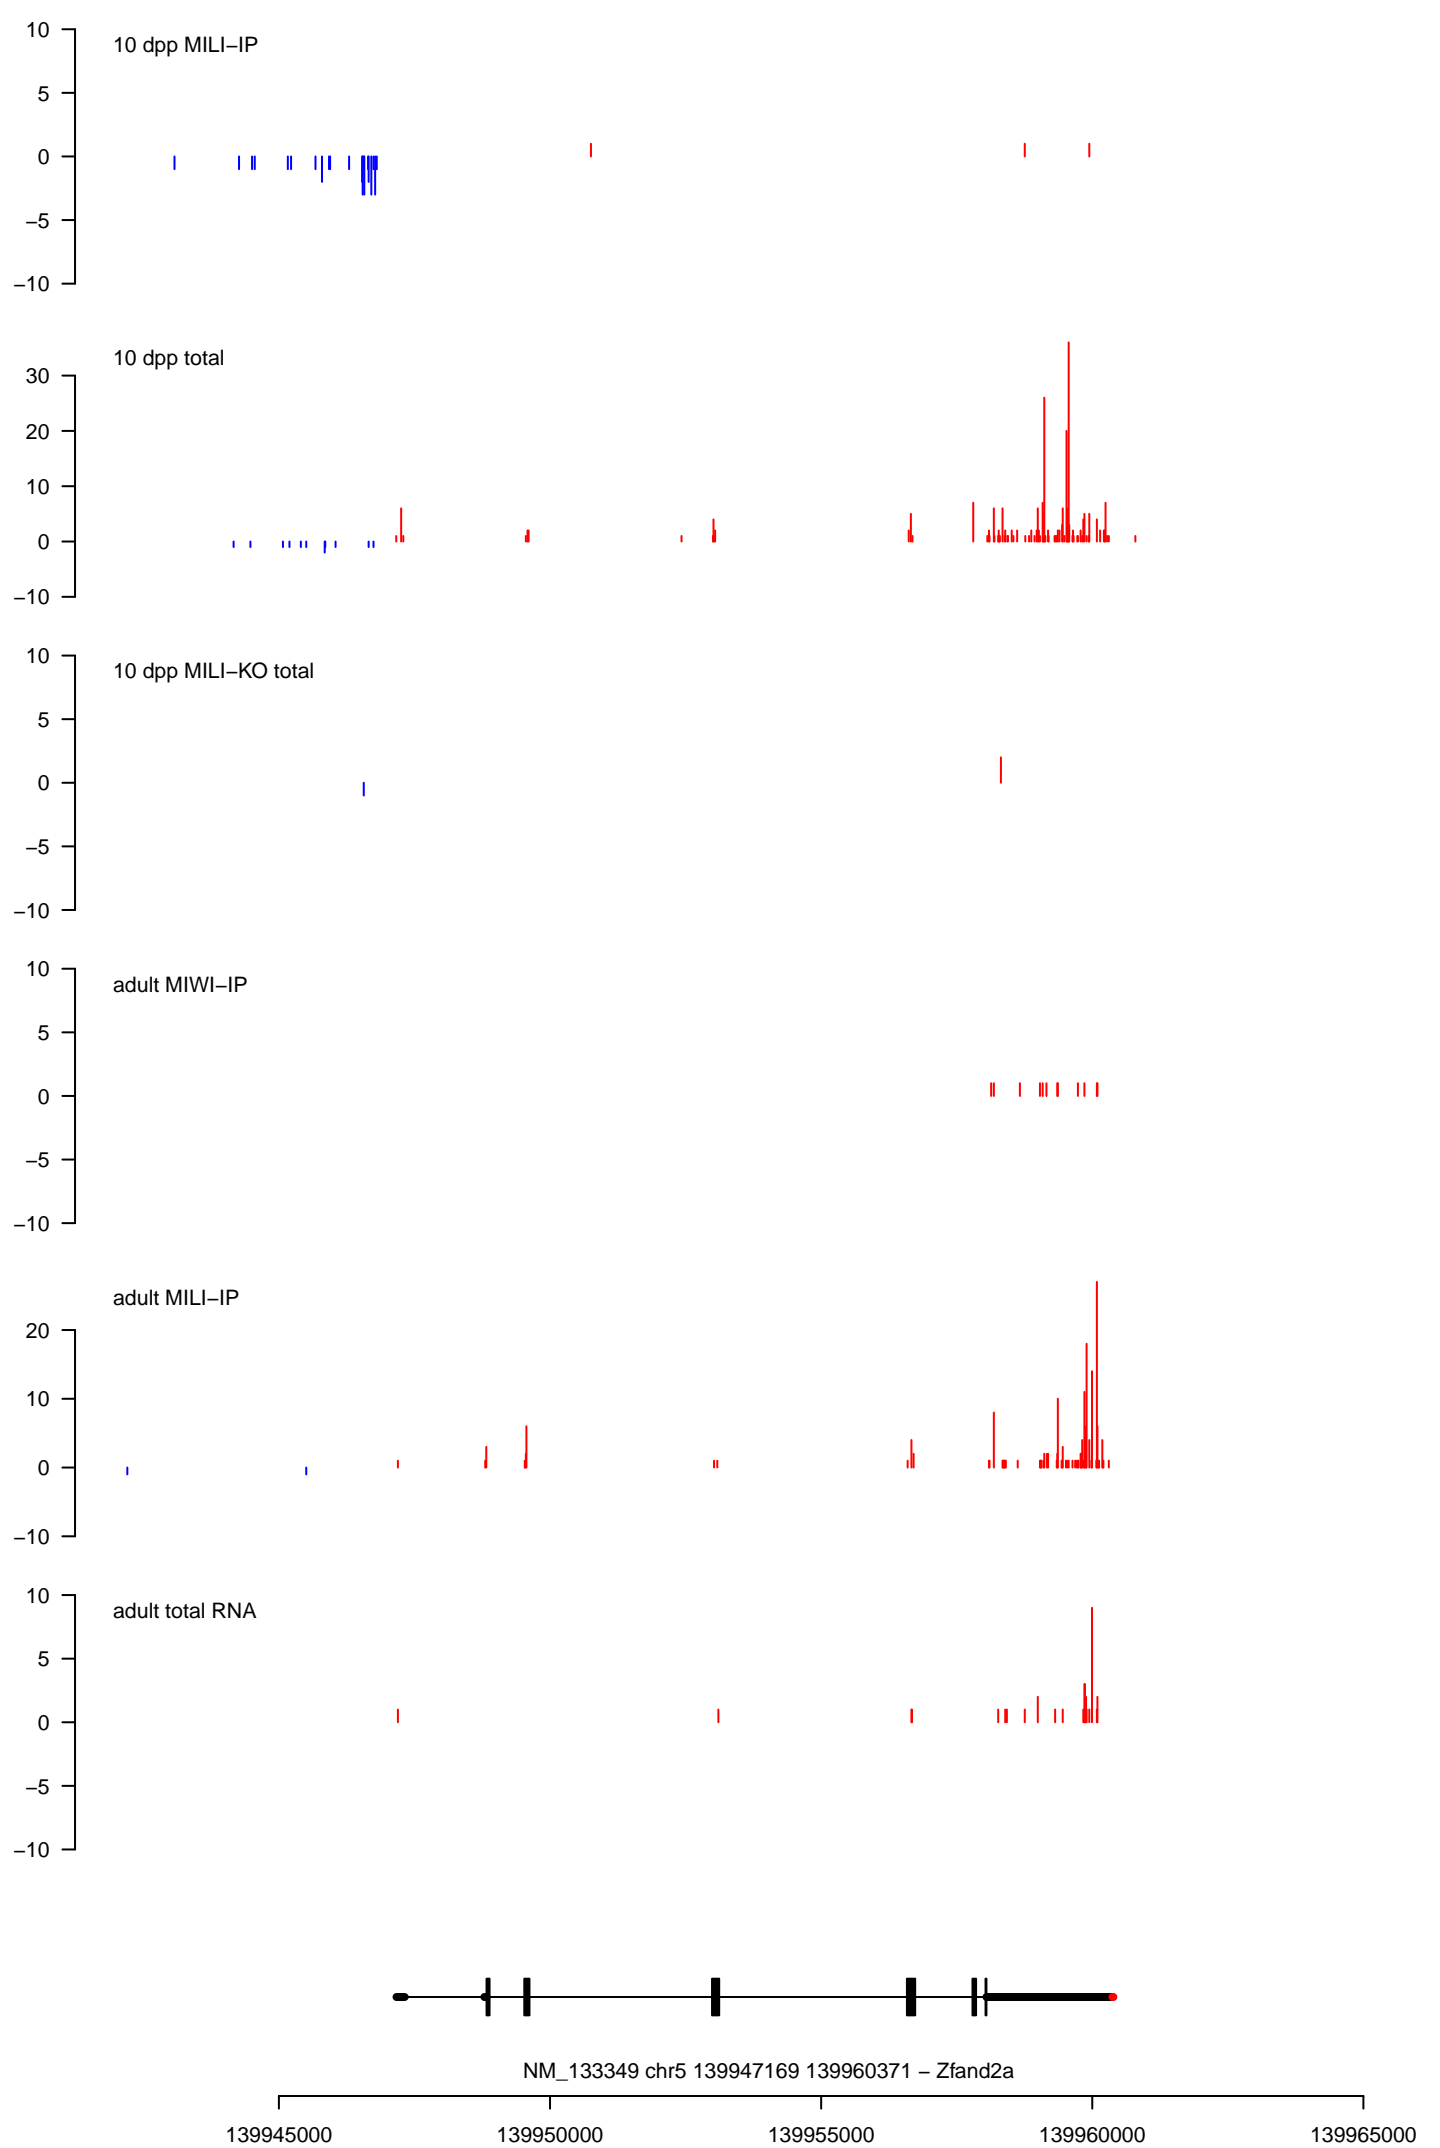

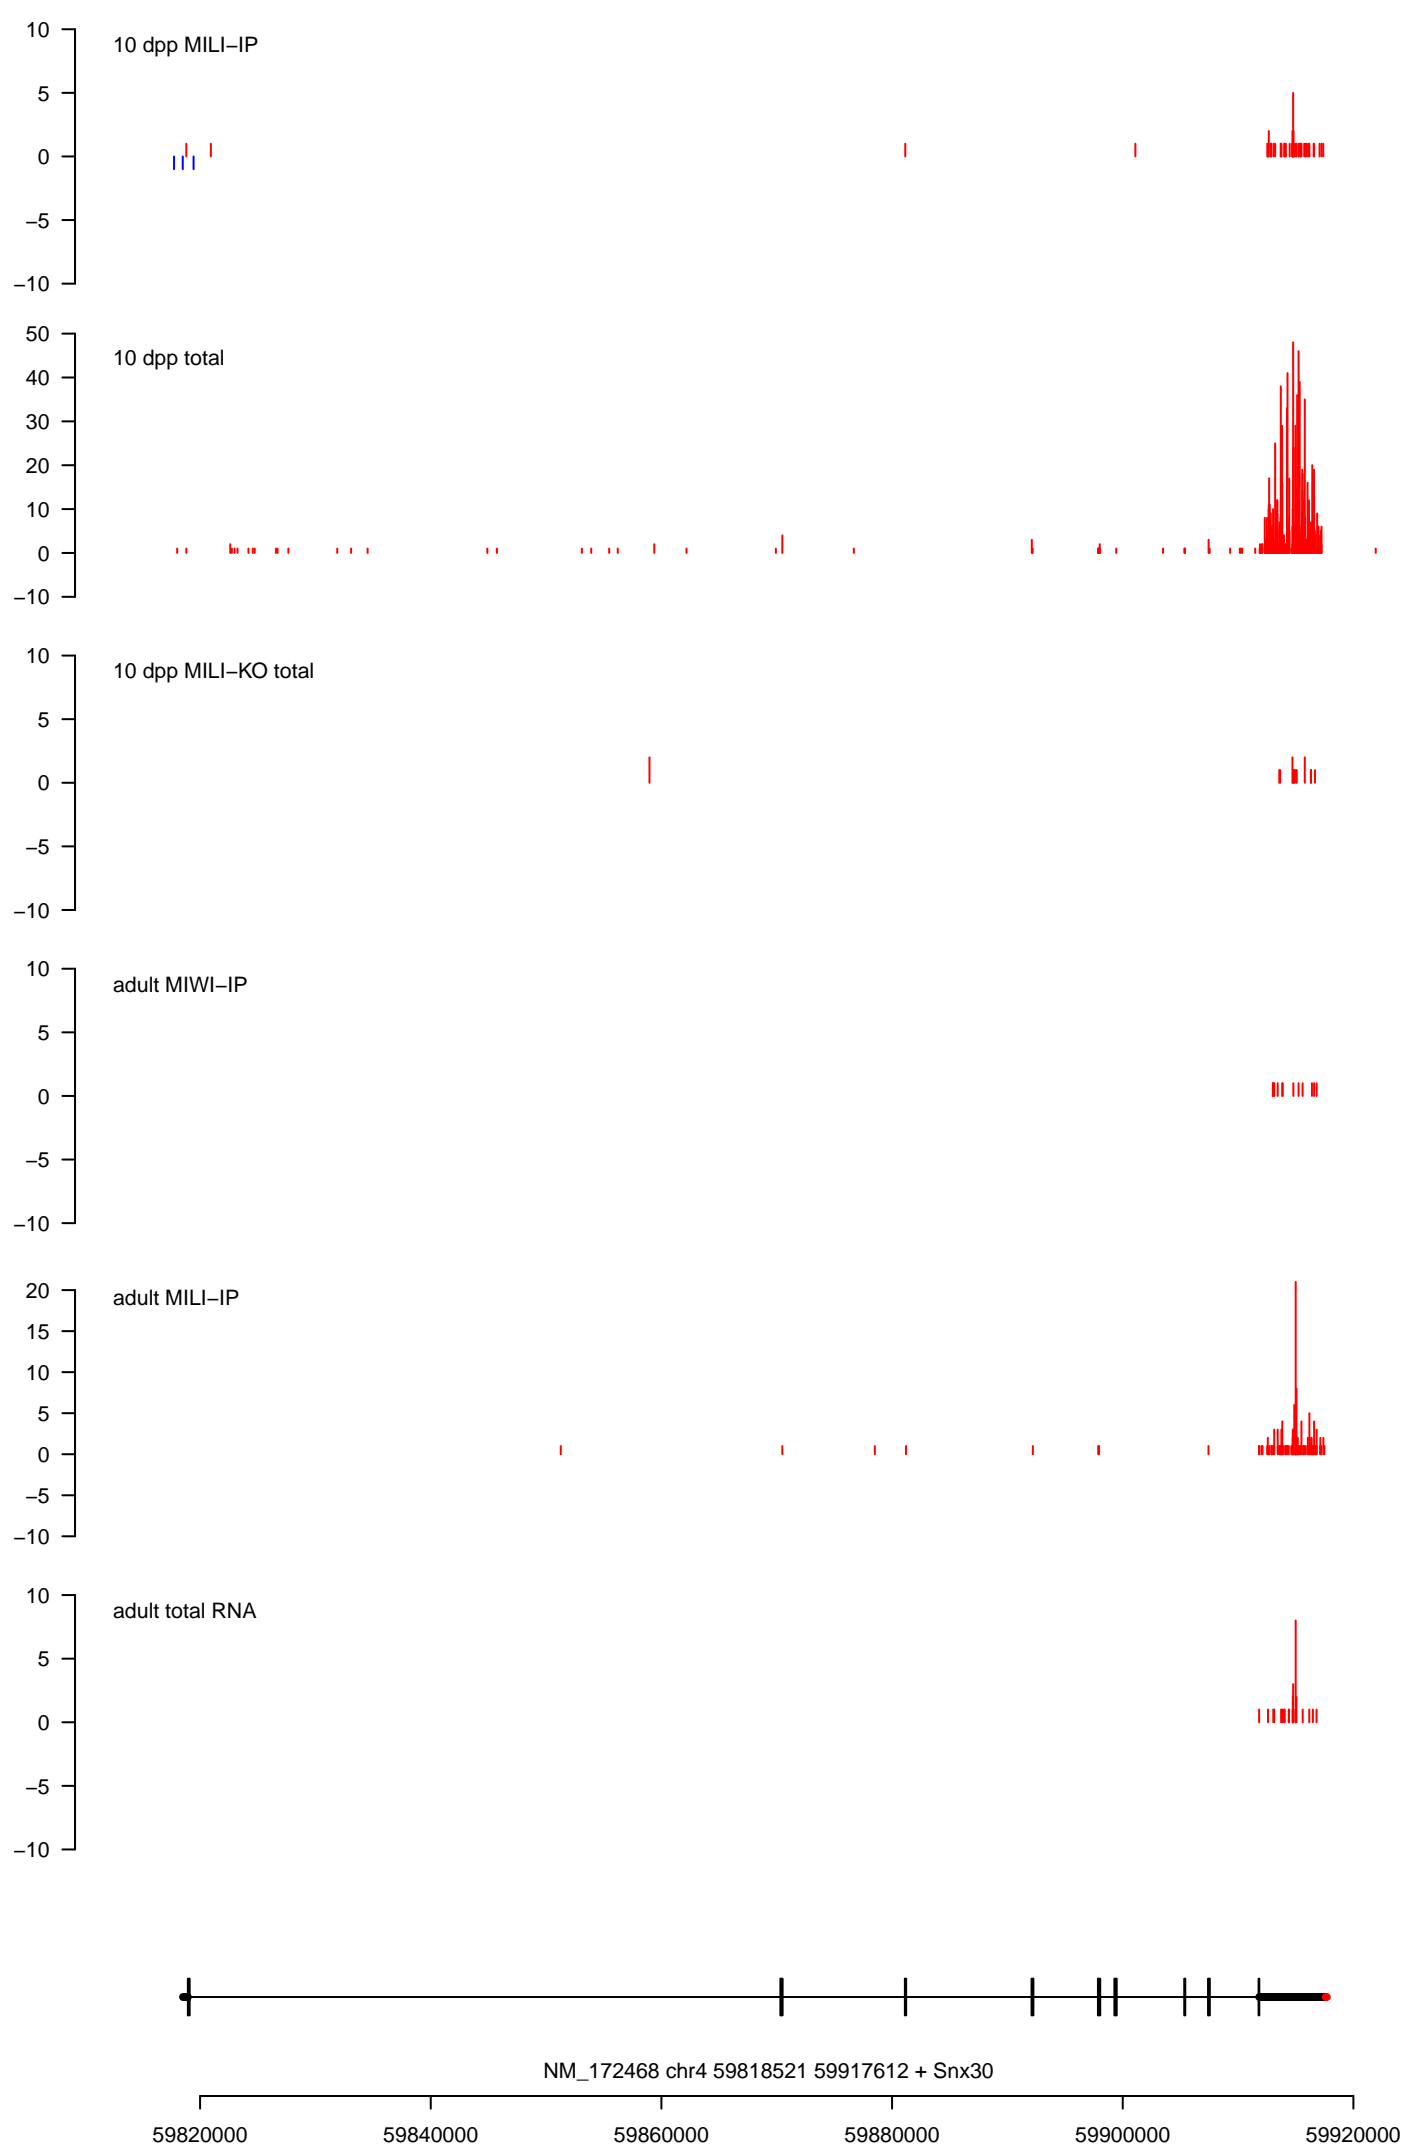

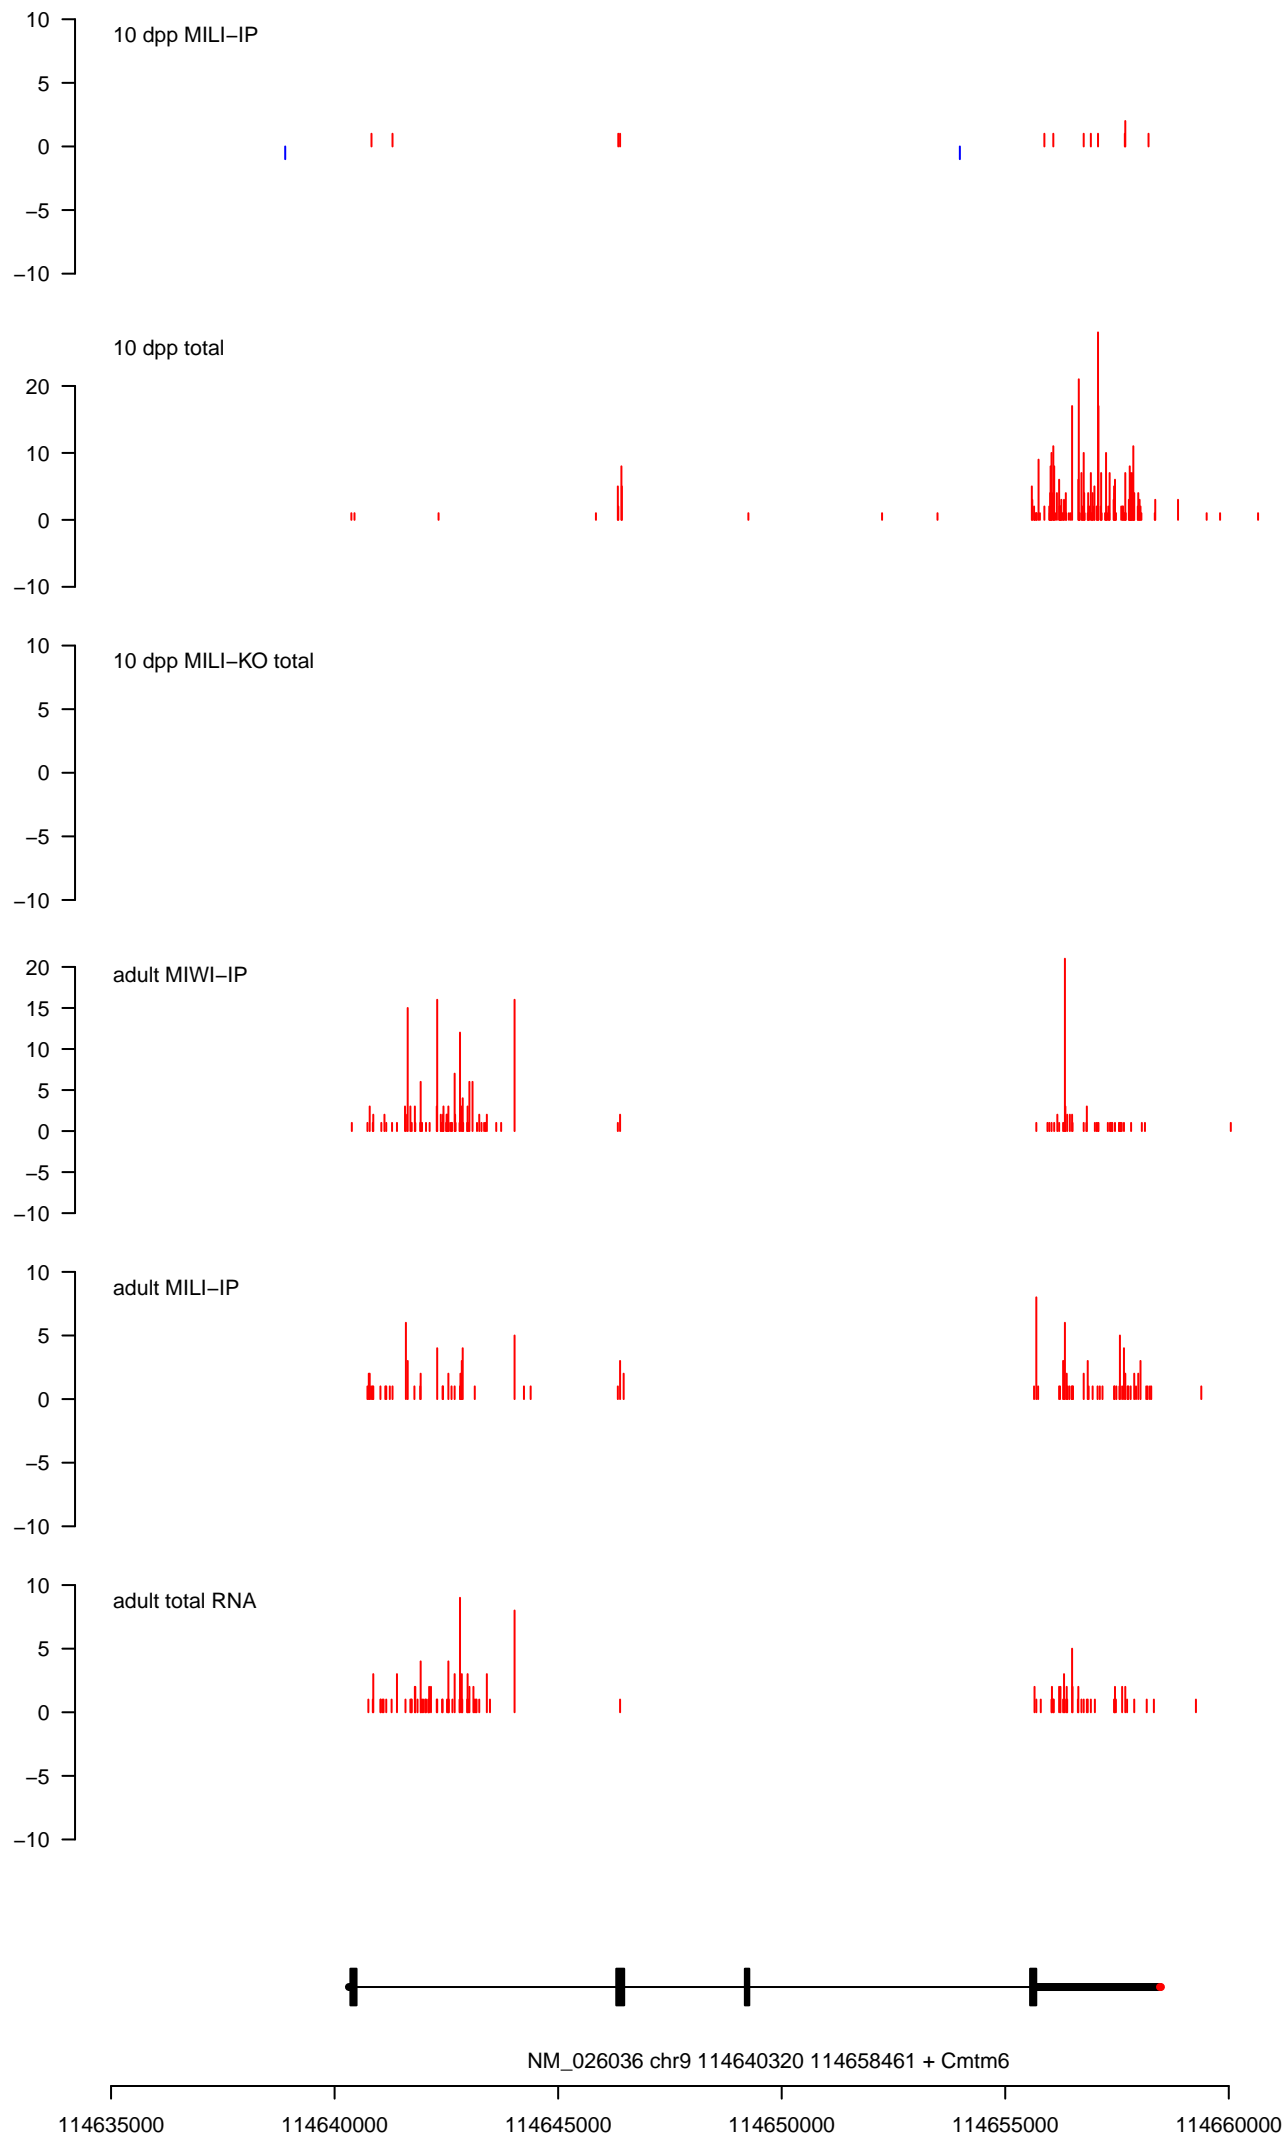

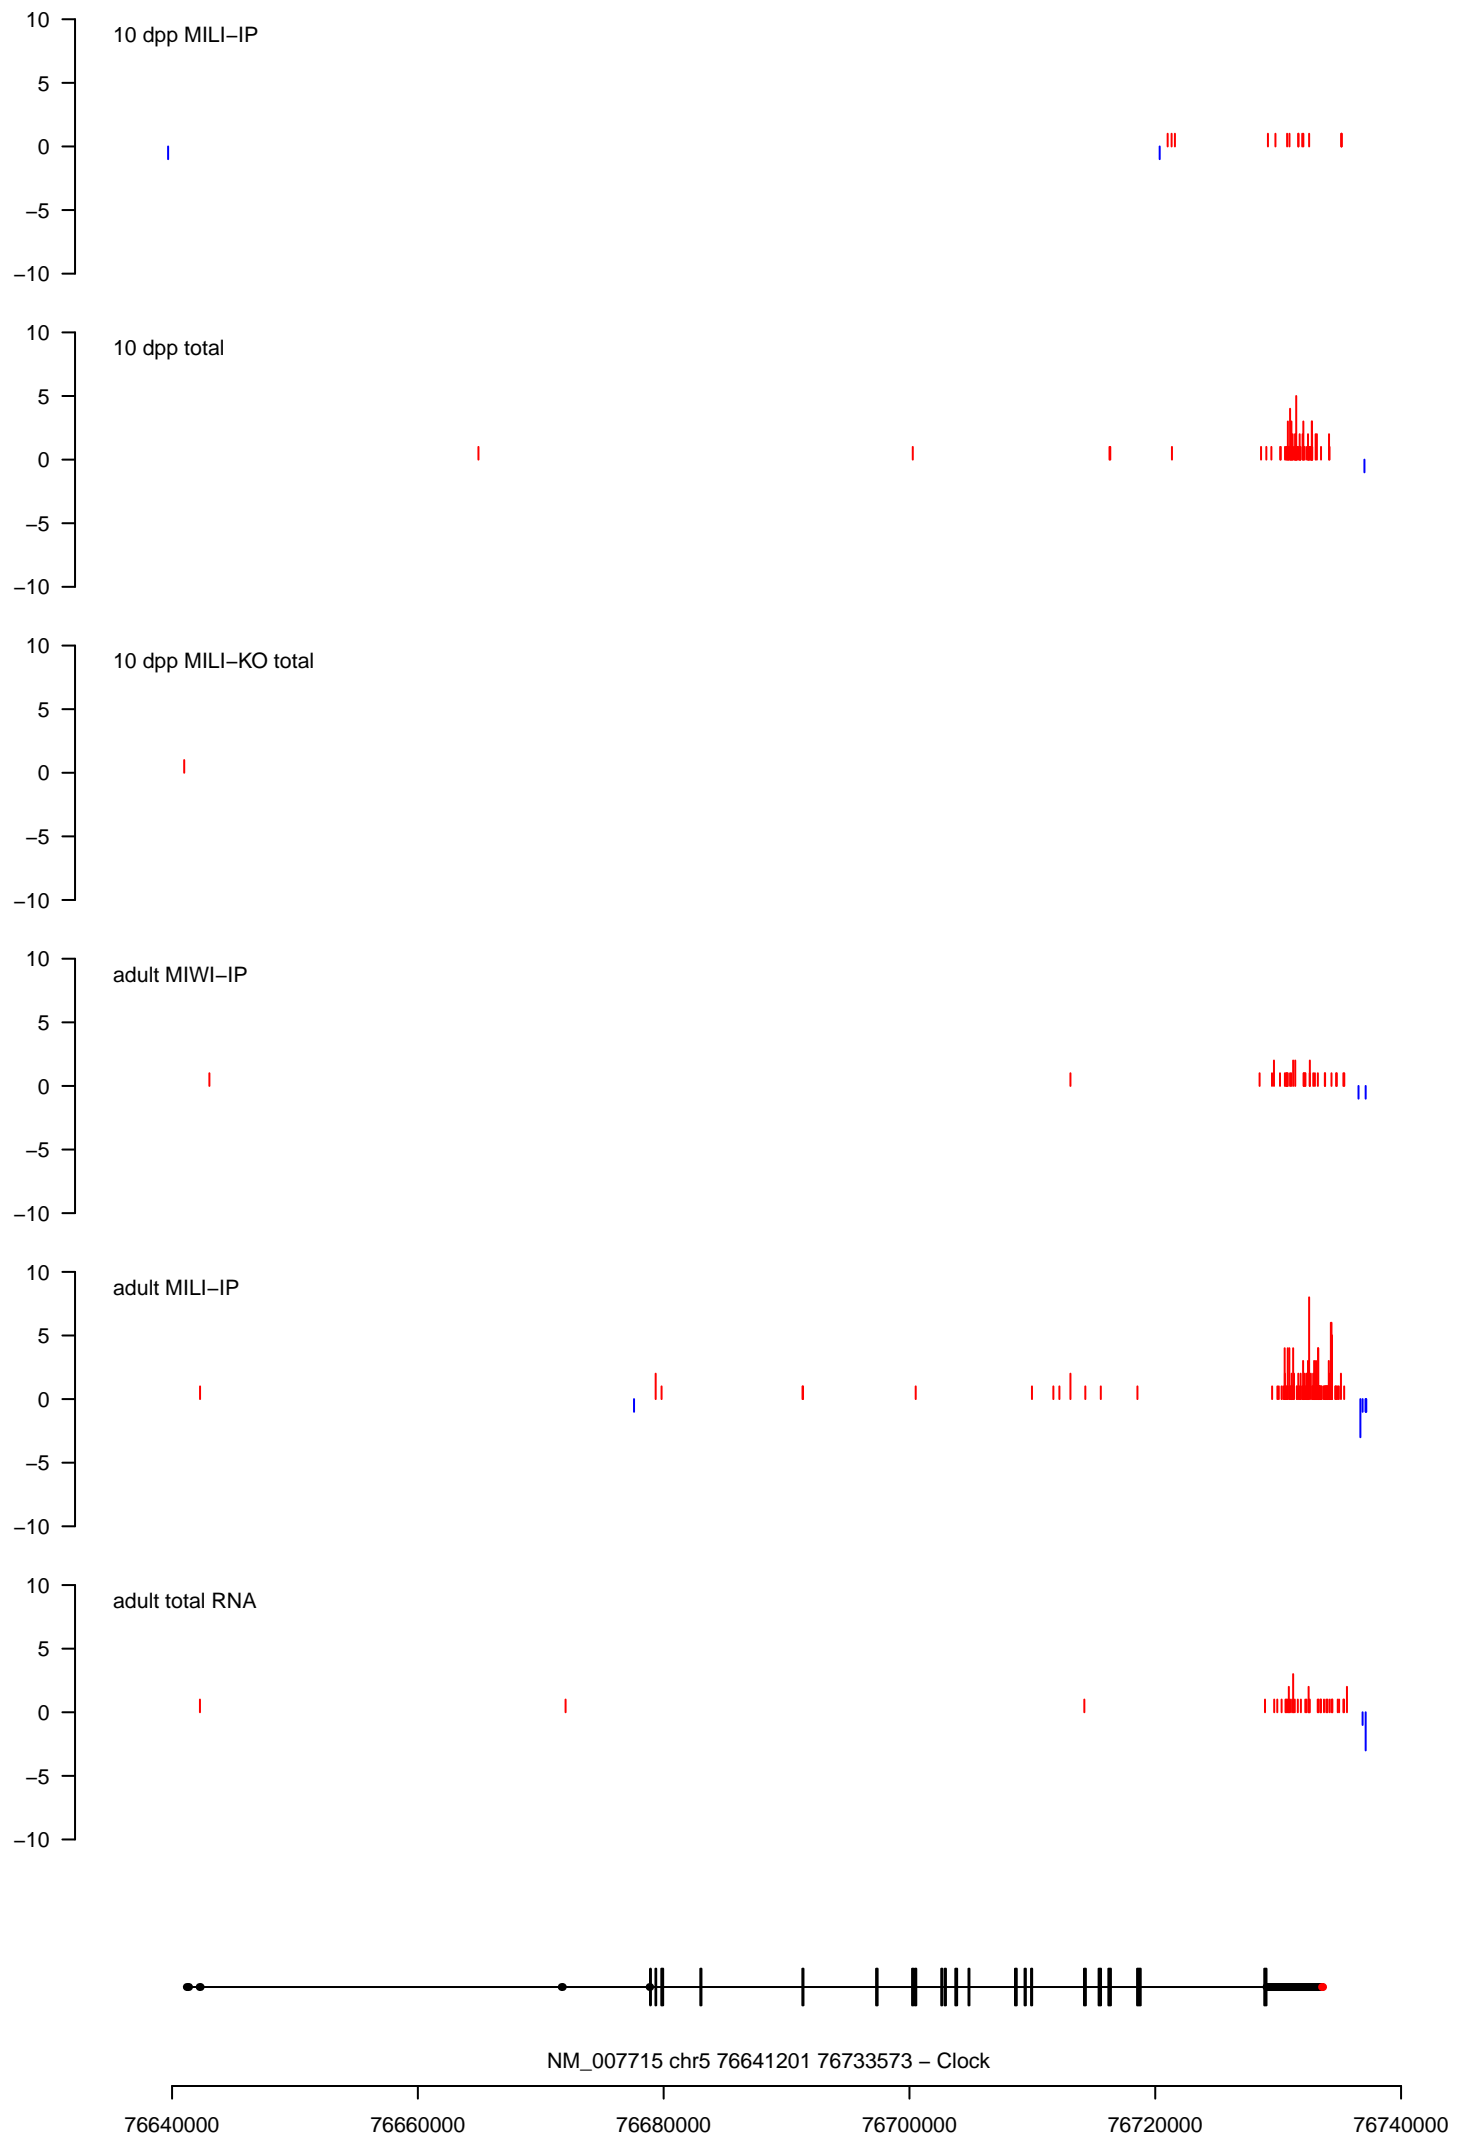

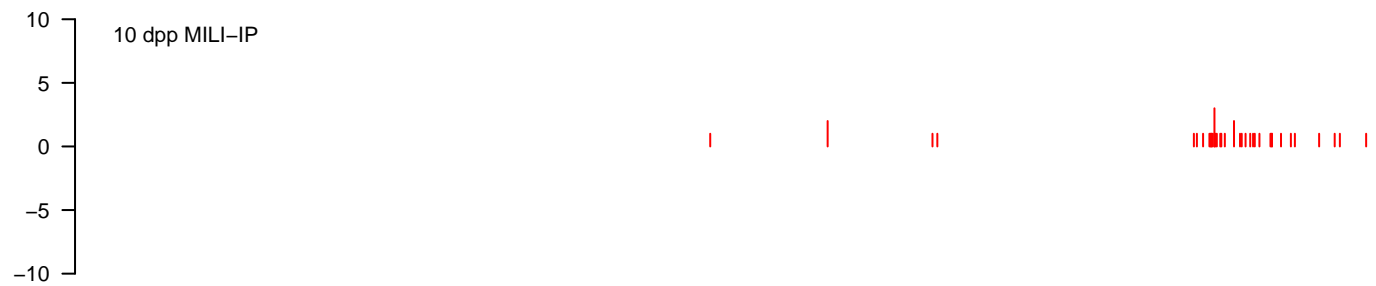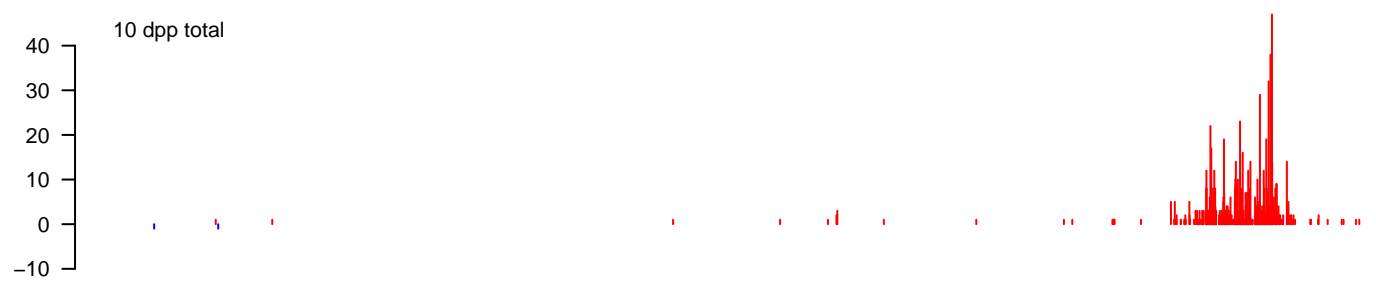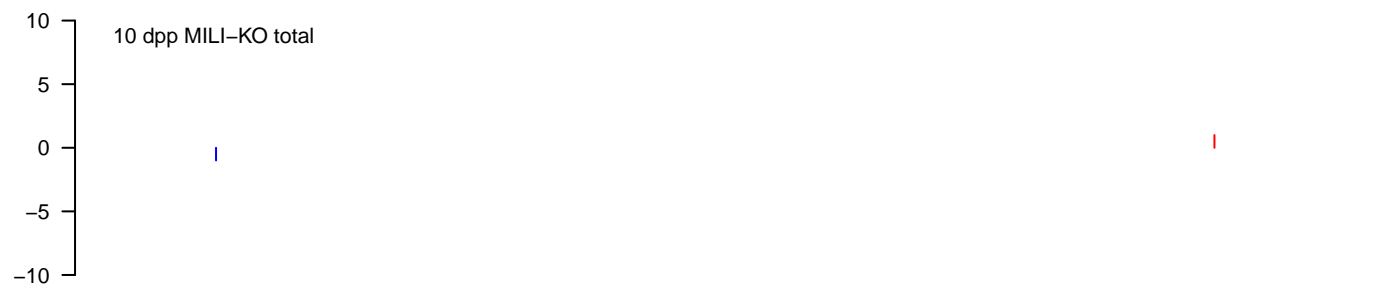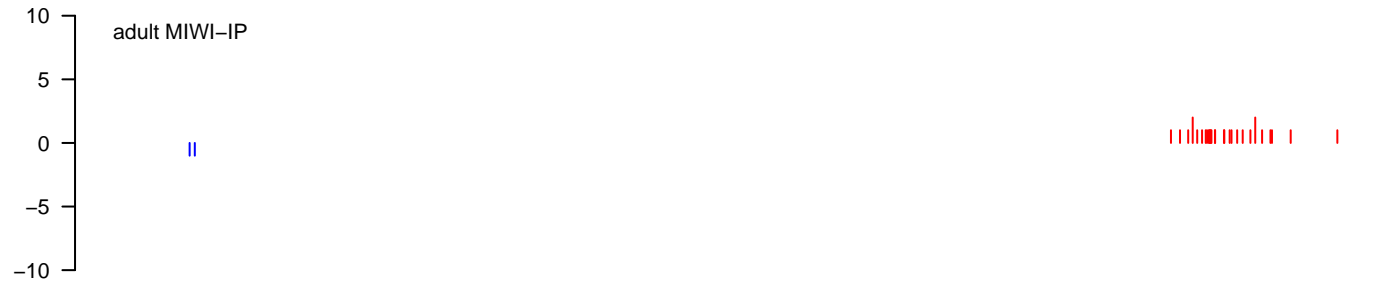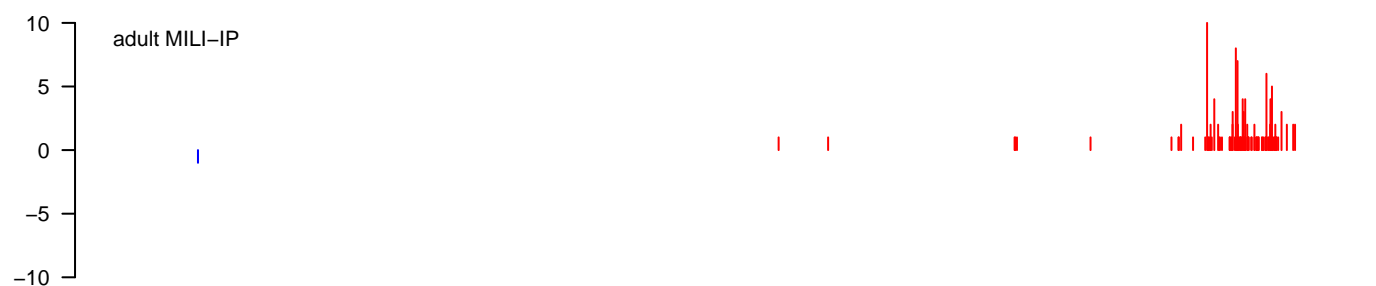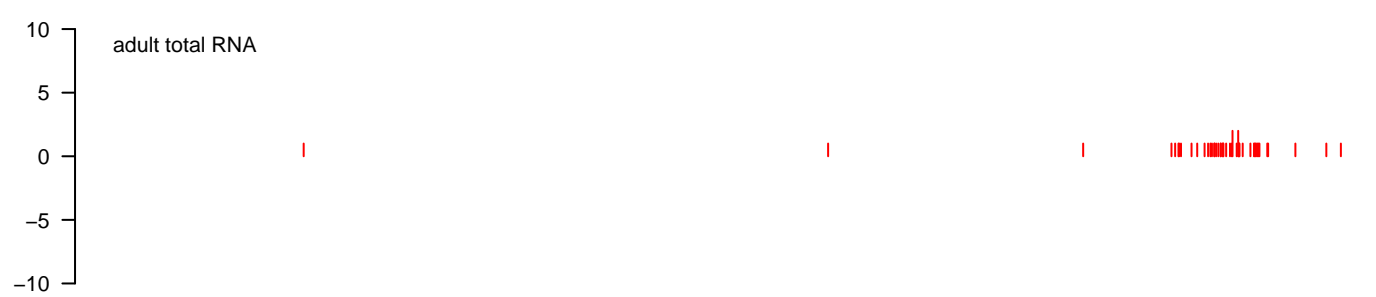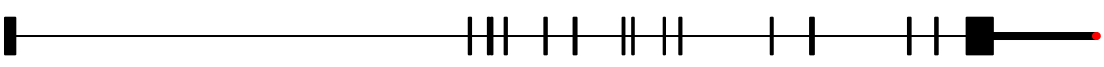

NM\_001033173 chr7 128785535 128850767 - Usp31

128780000 128800000 128820000 128840000



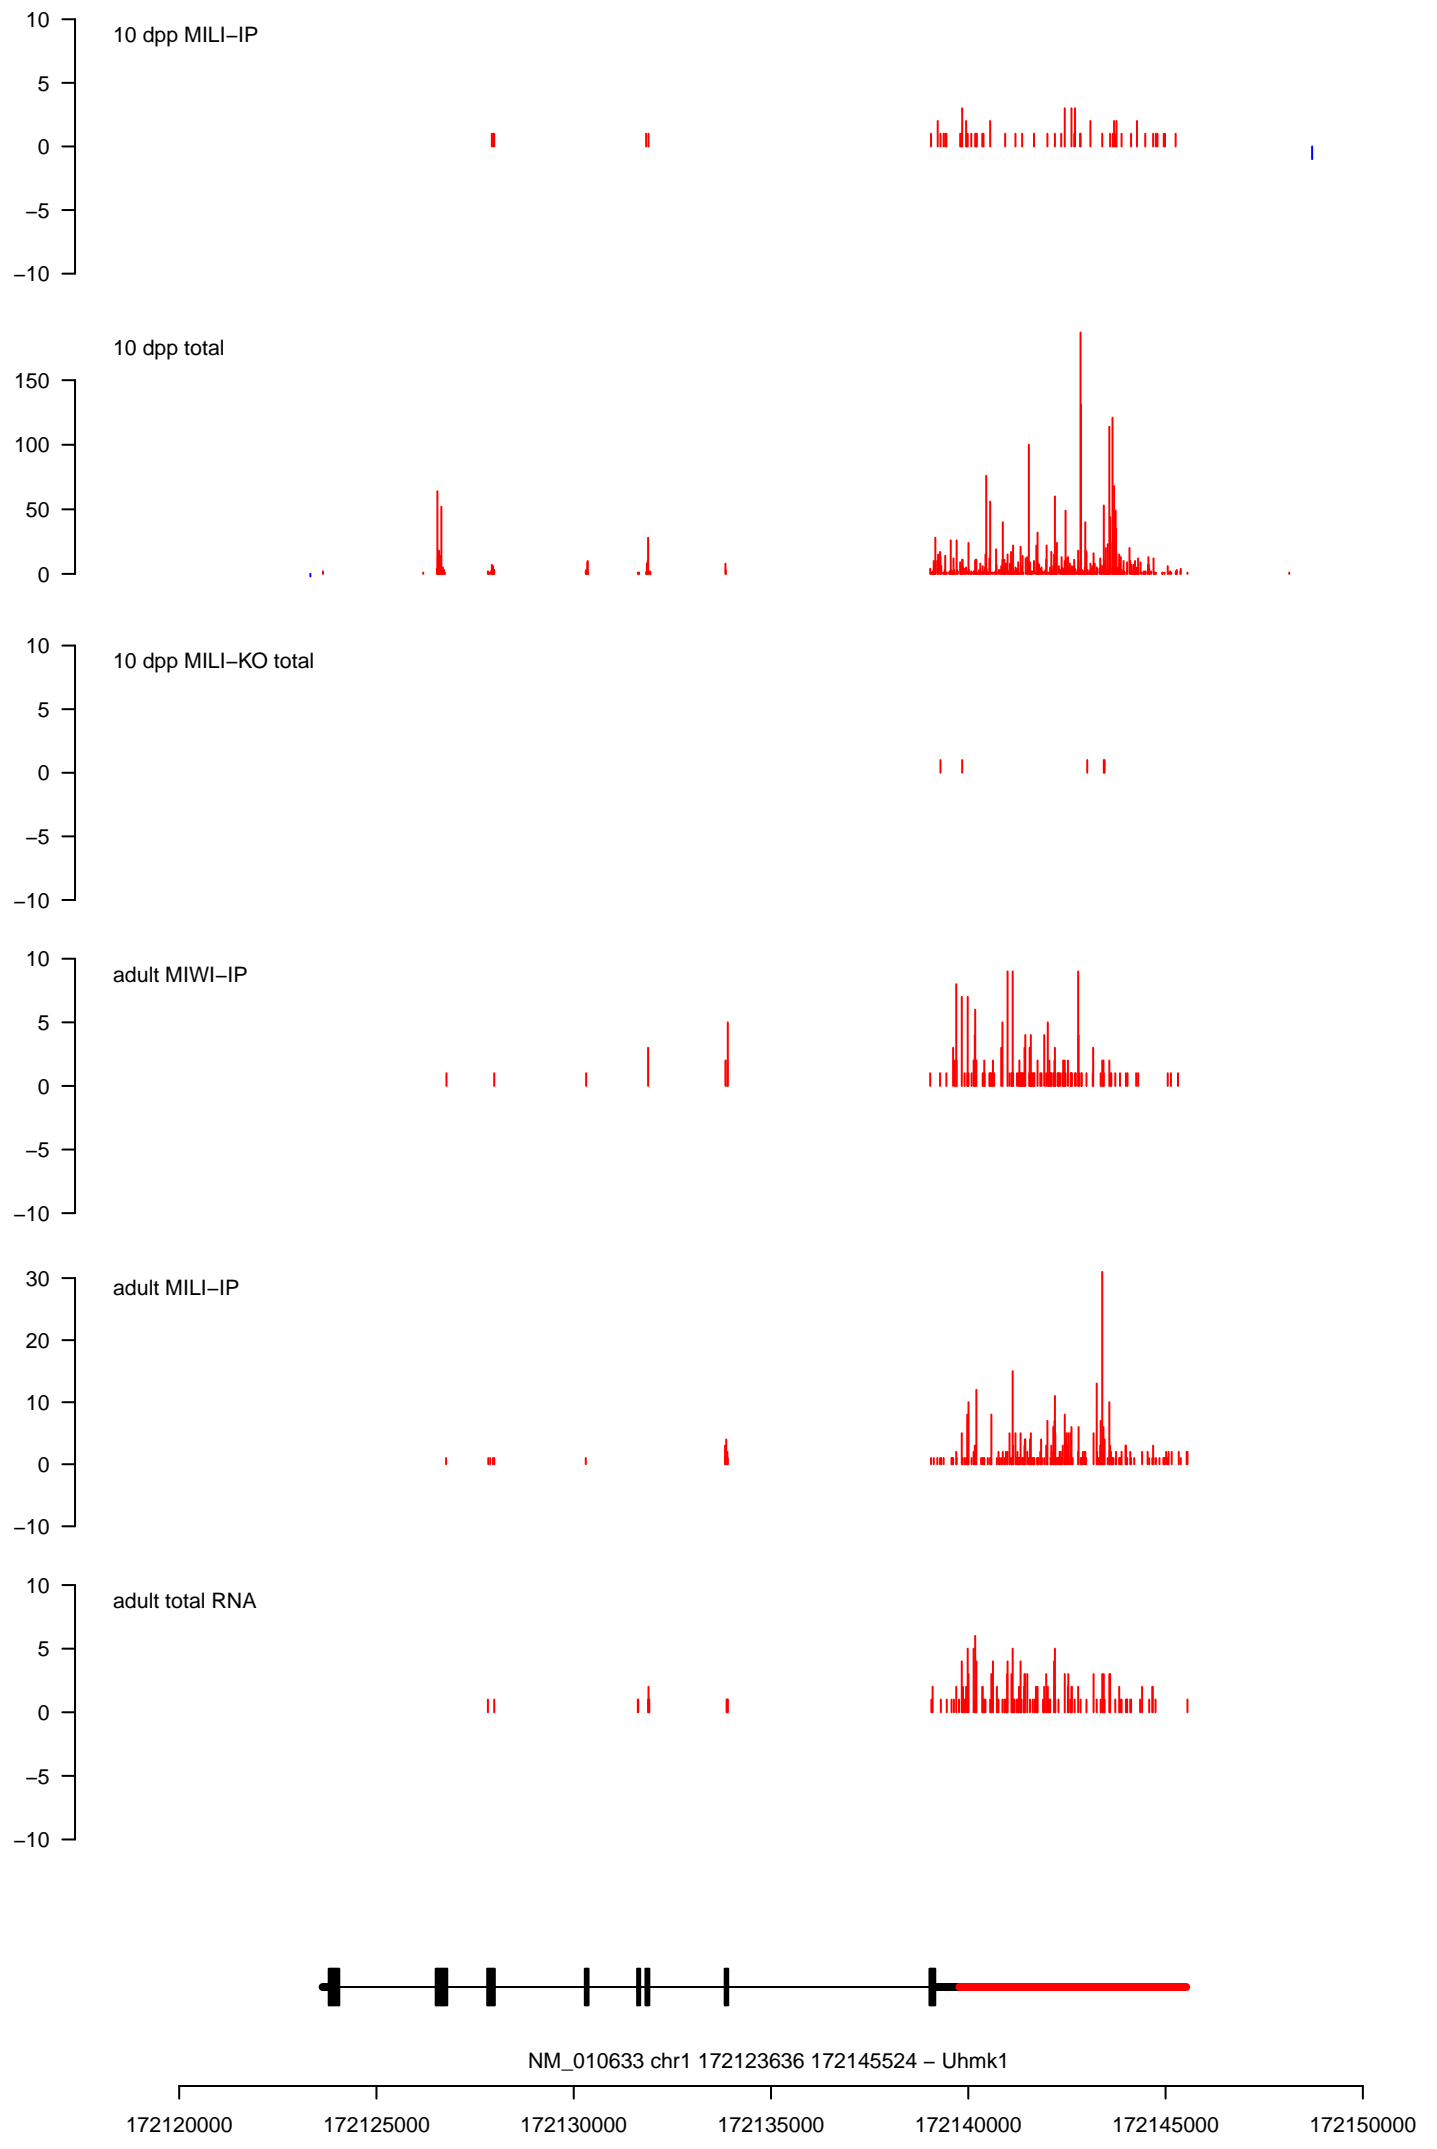

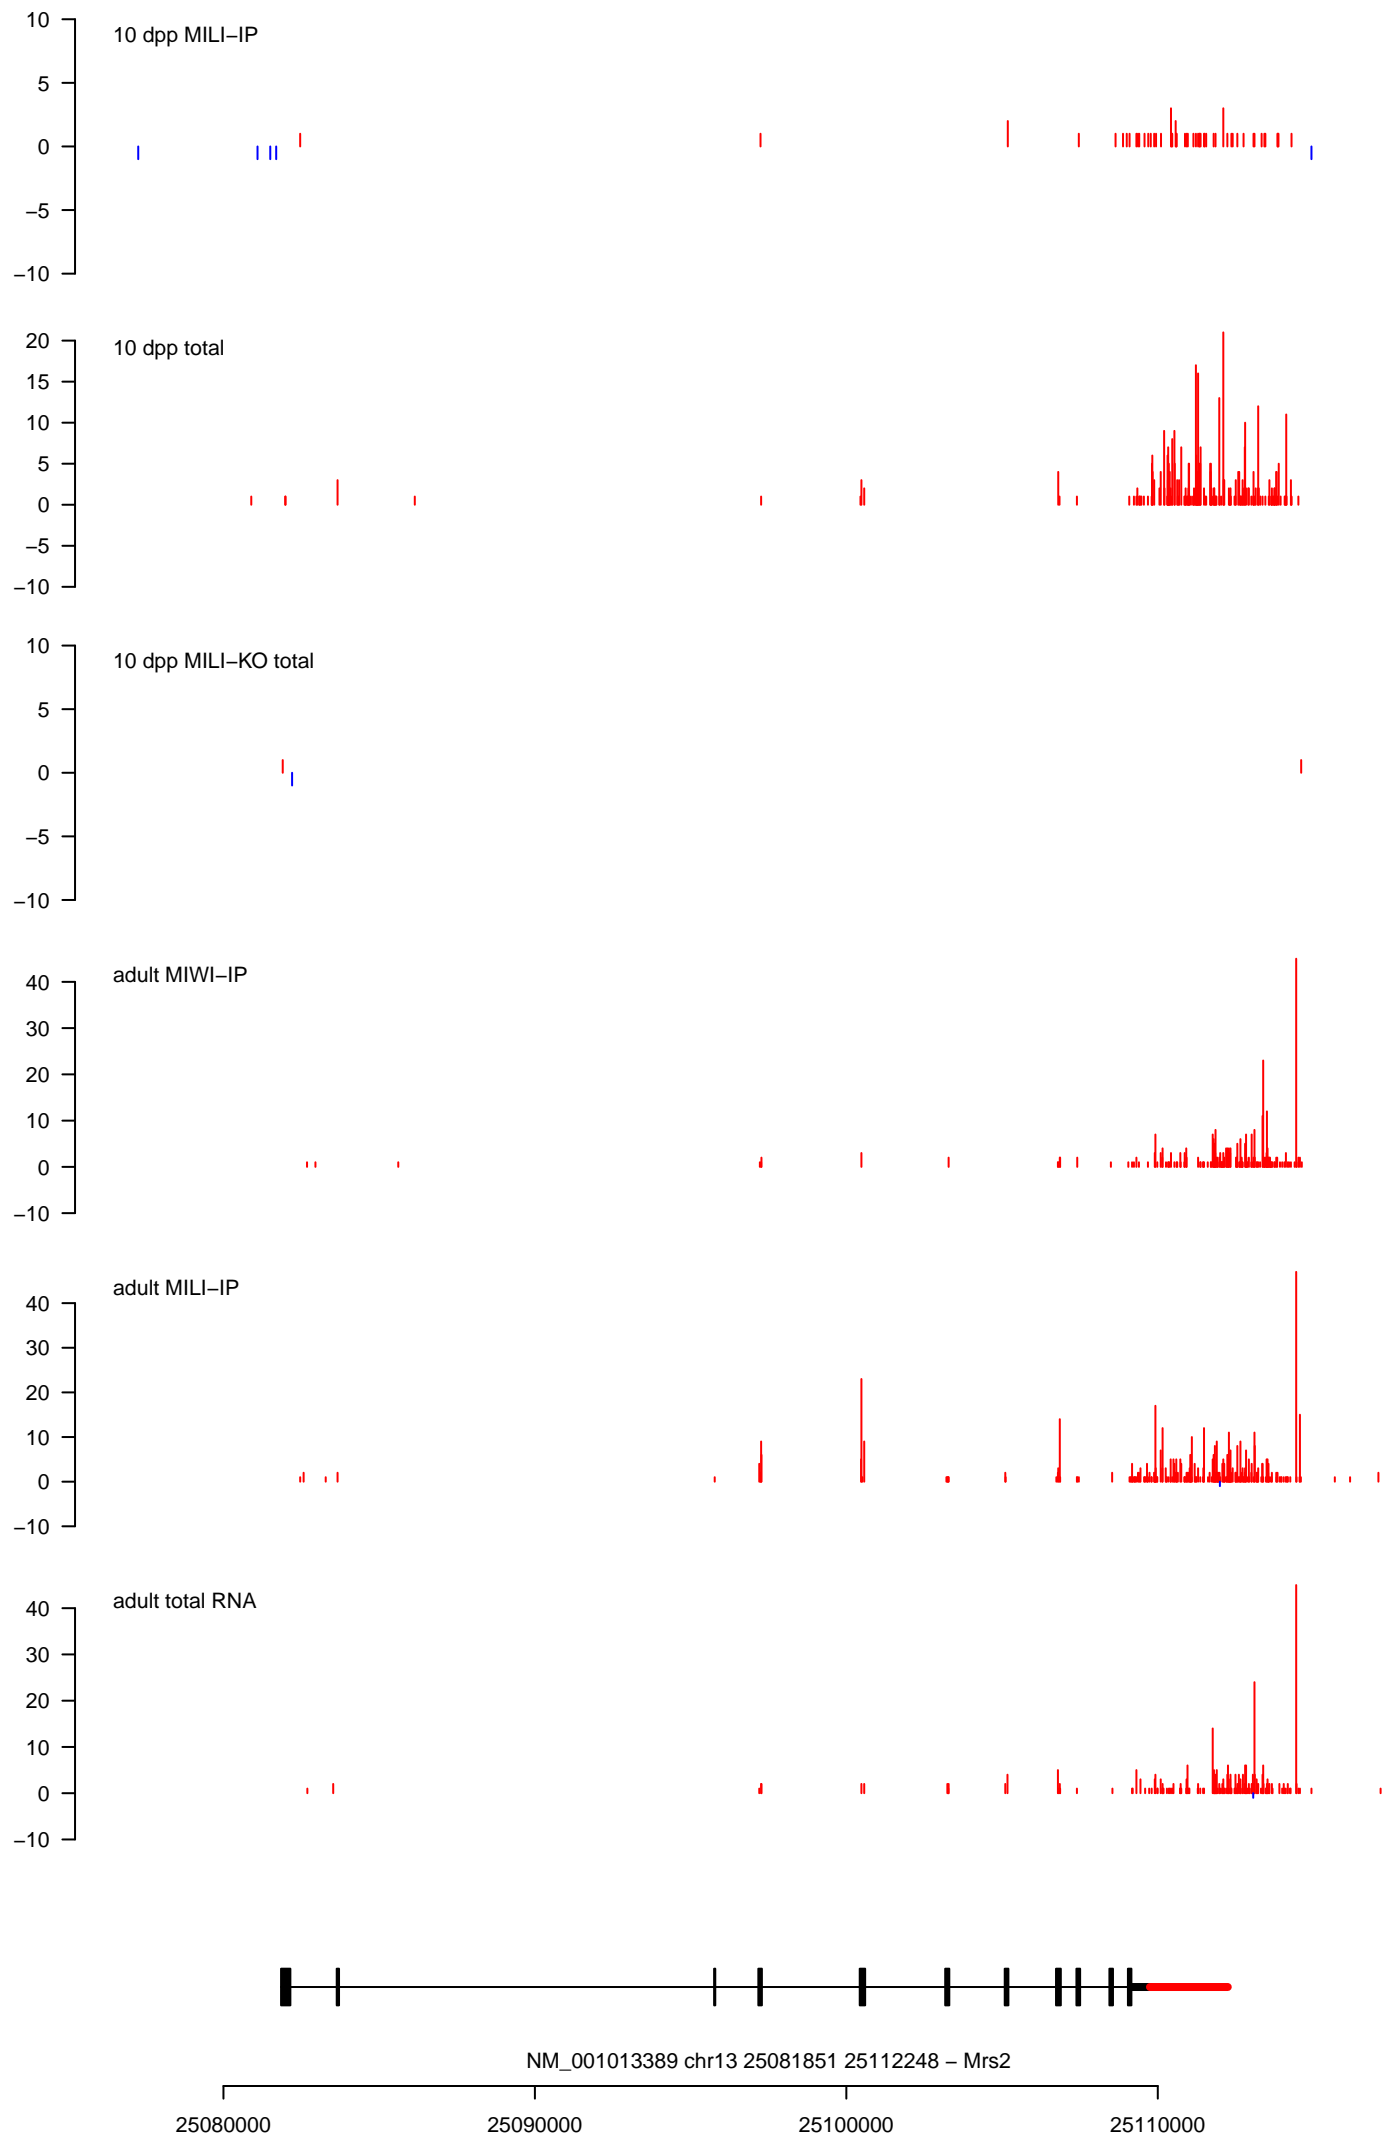

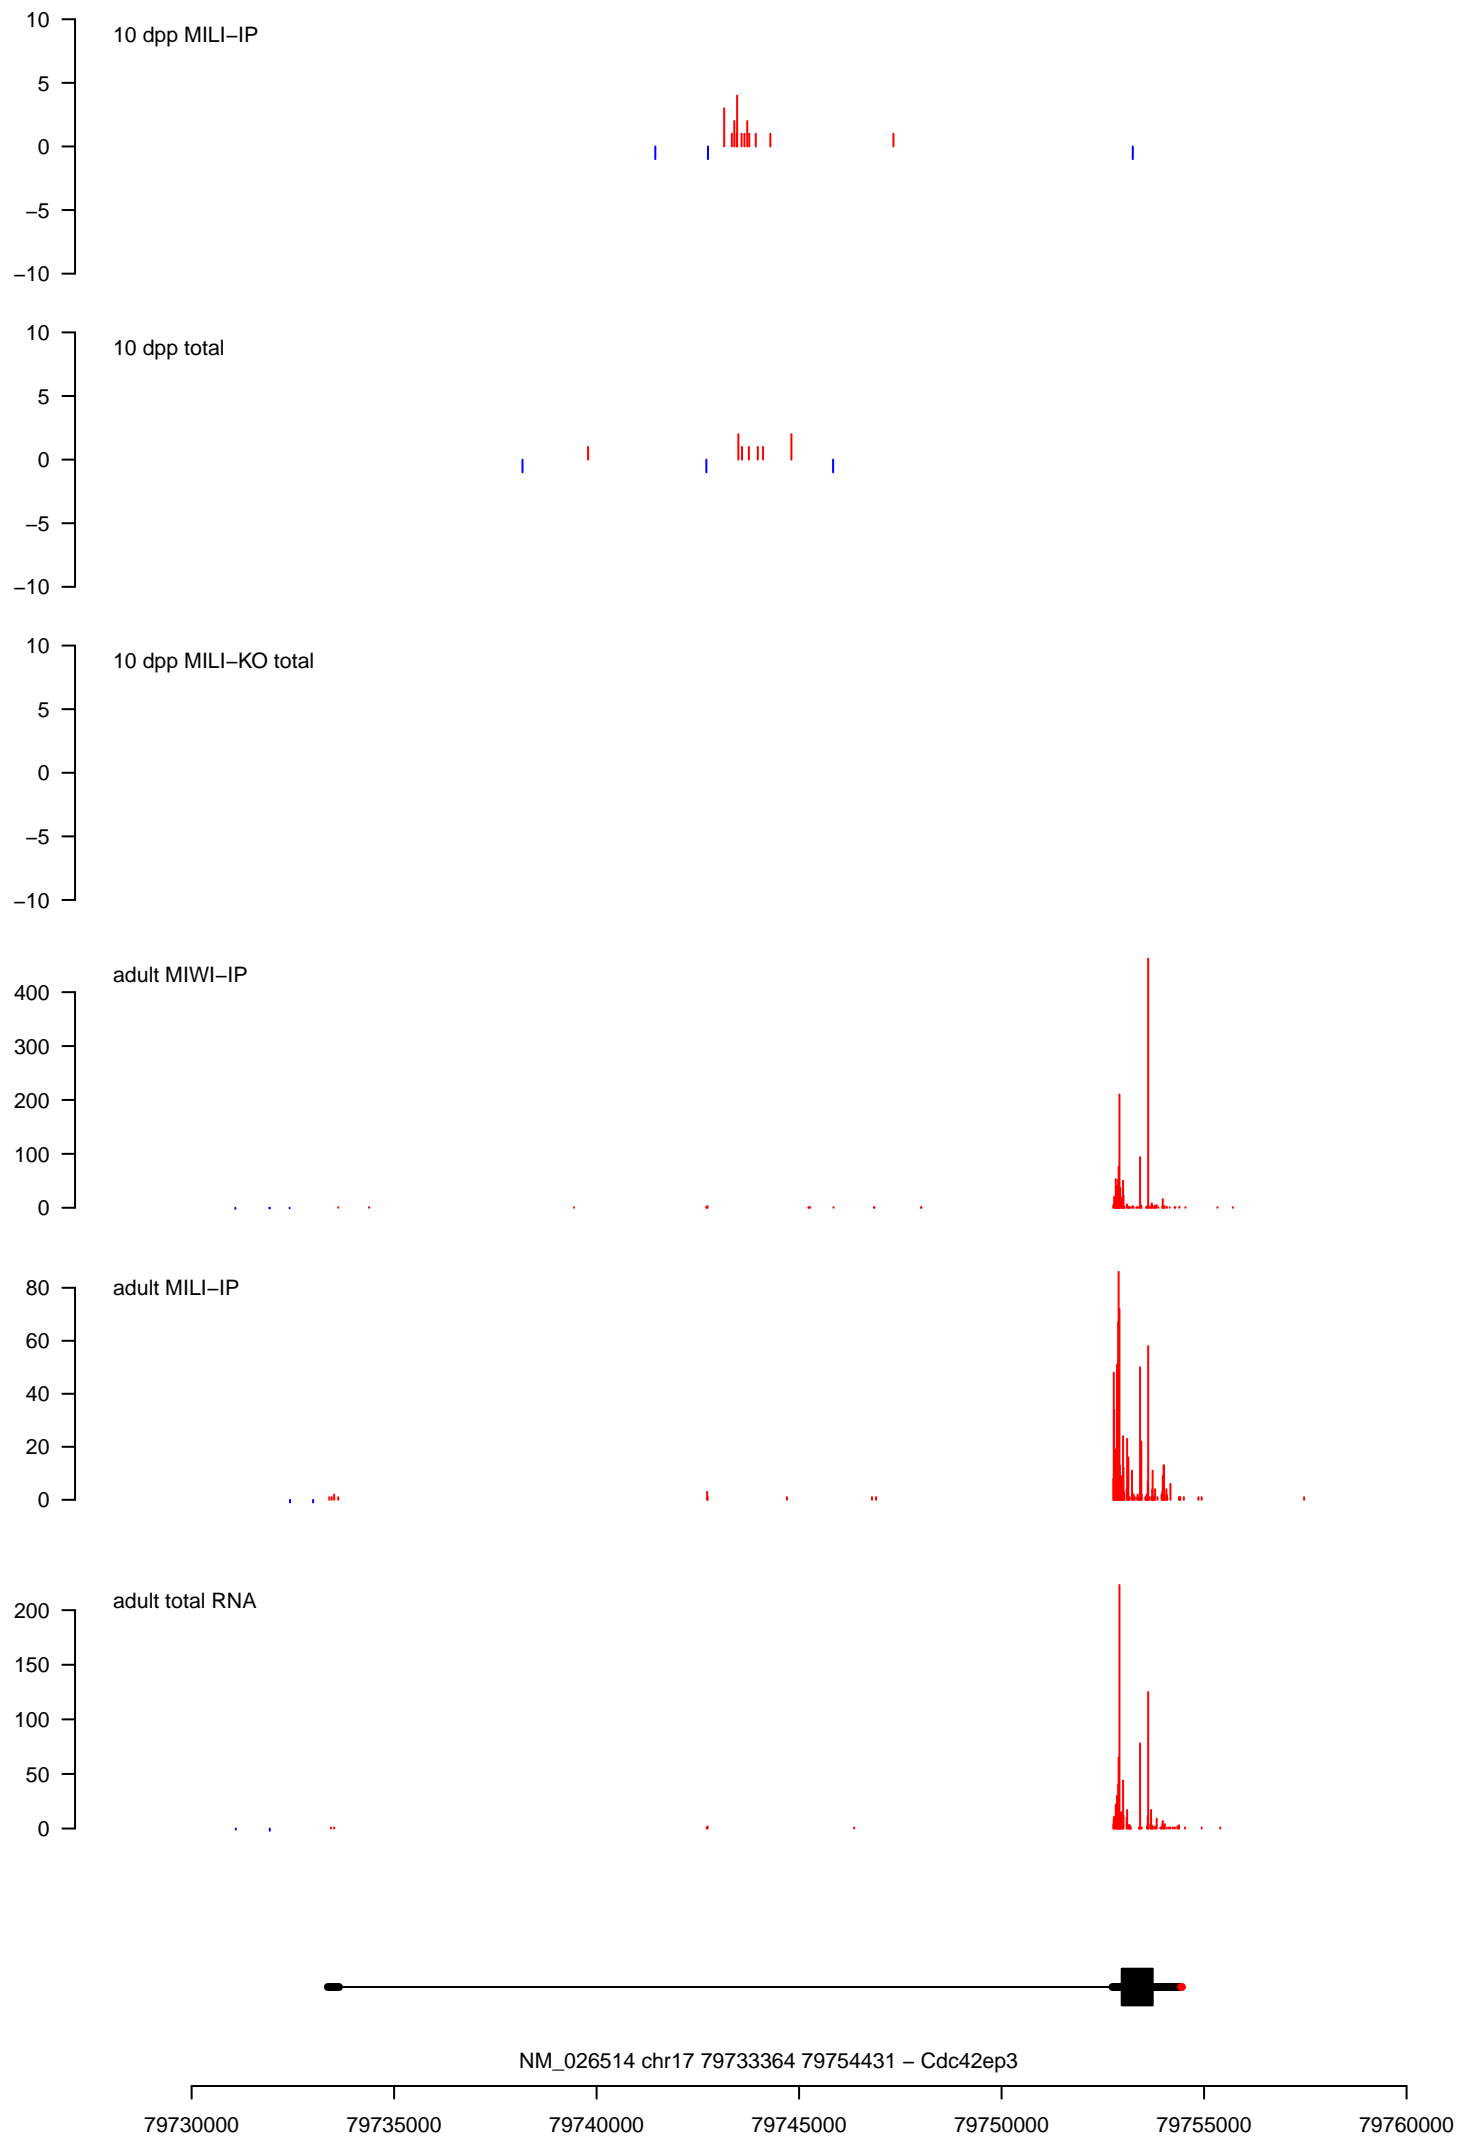

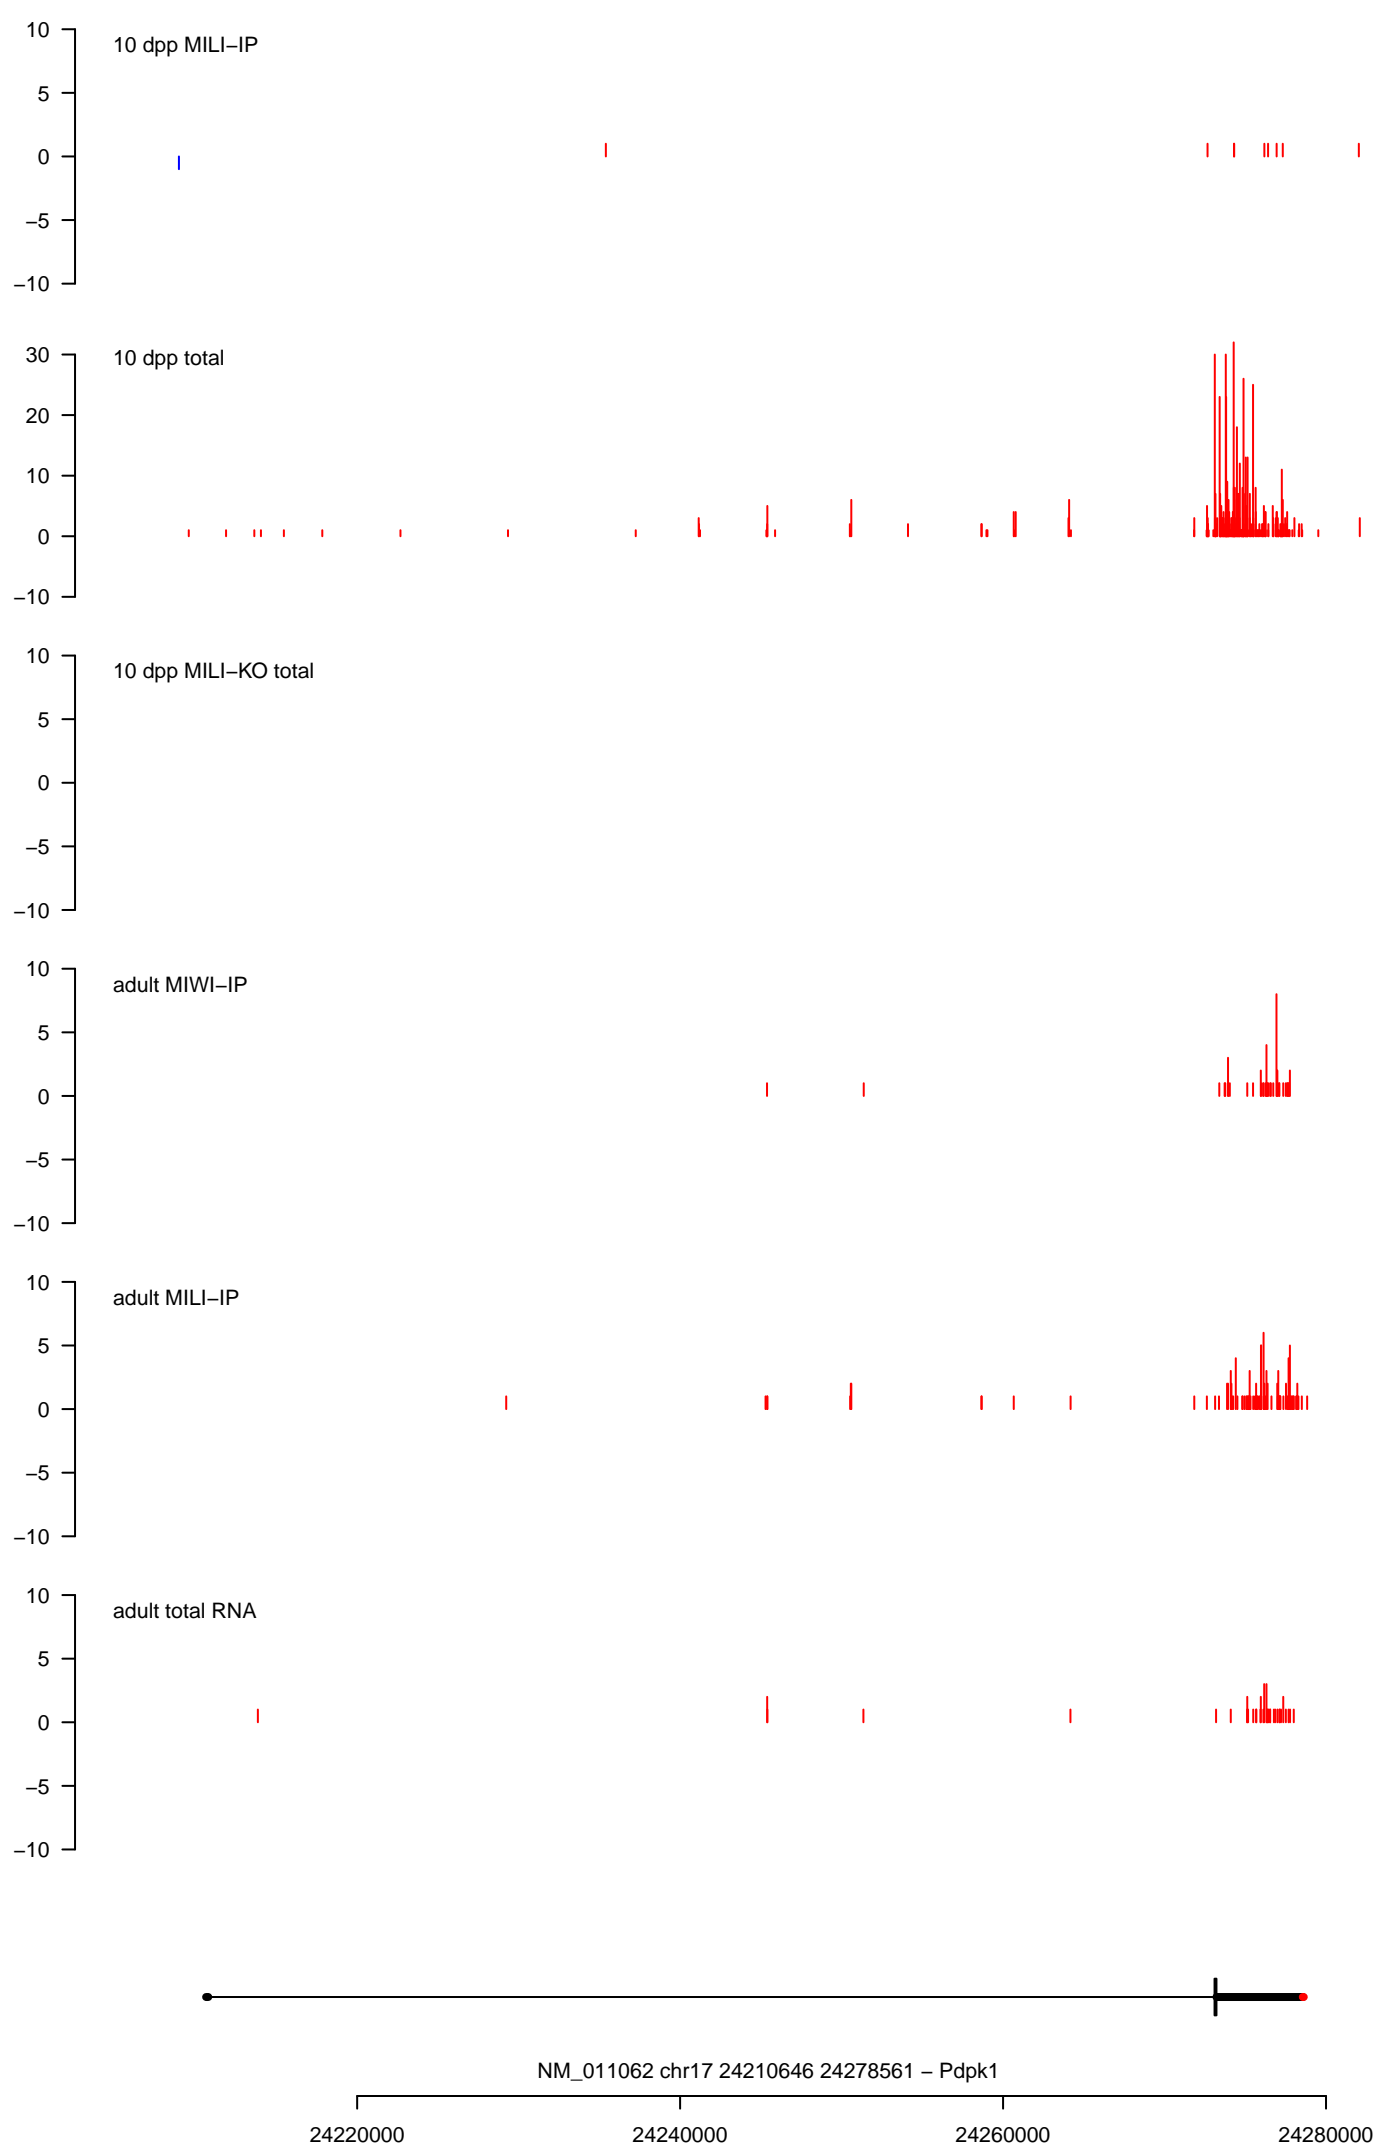

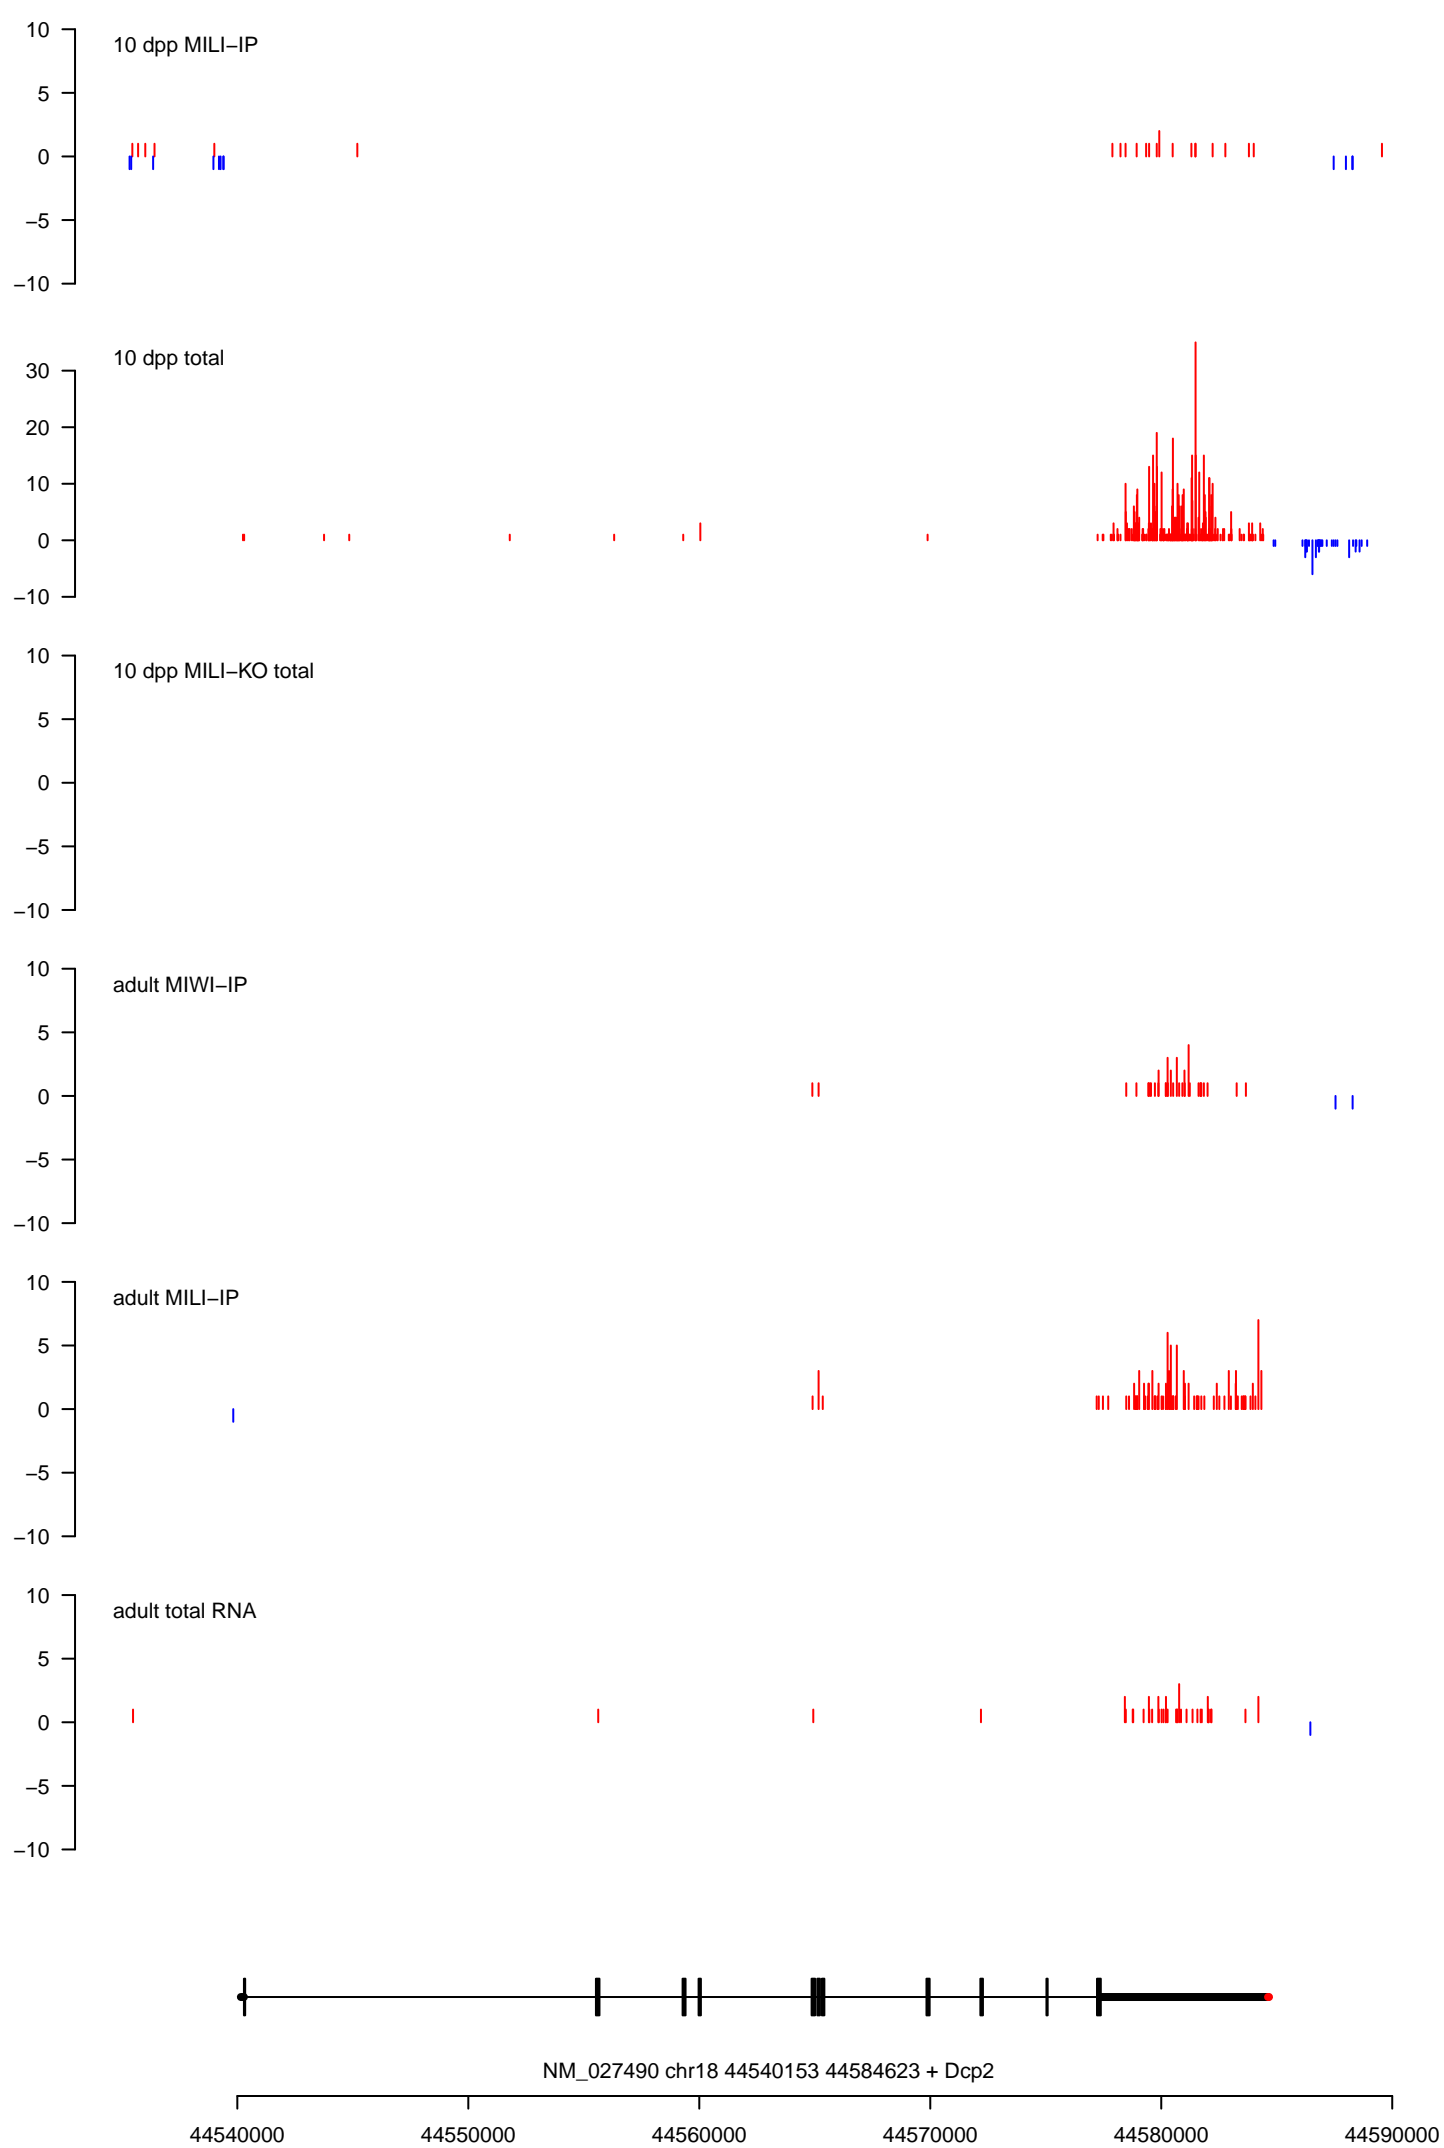

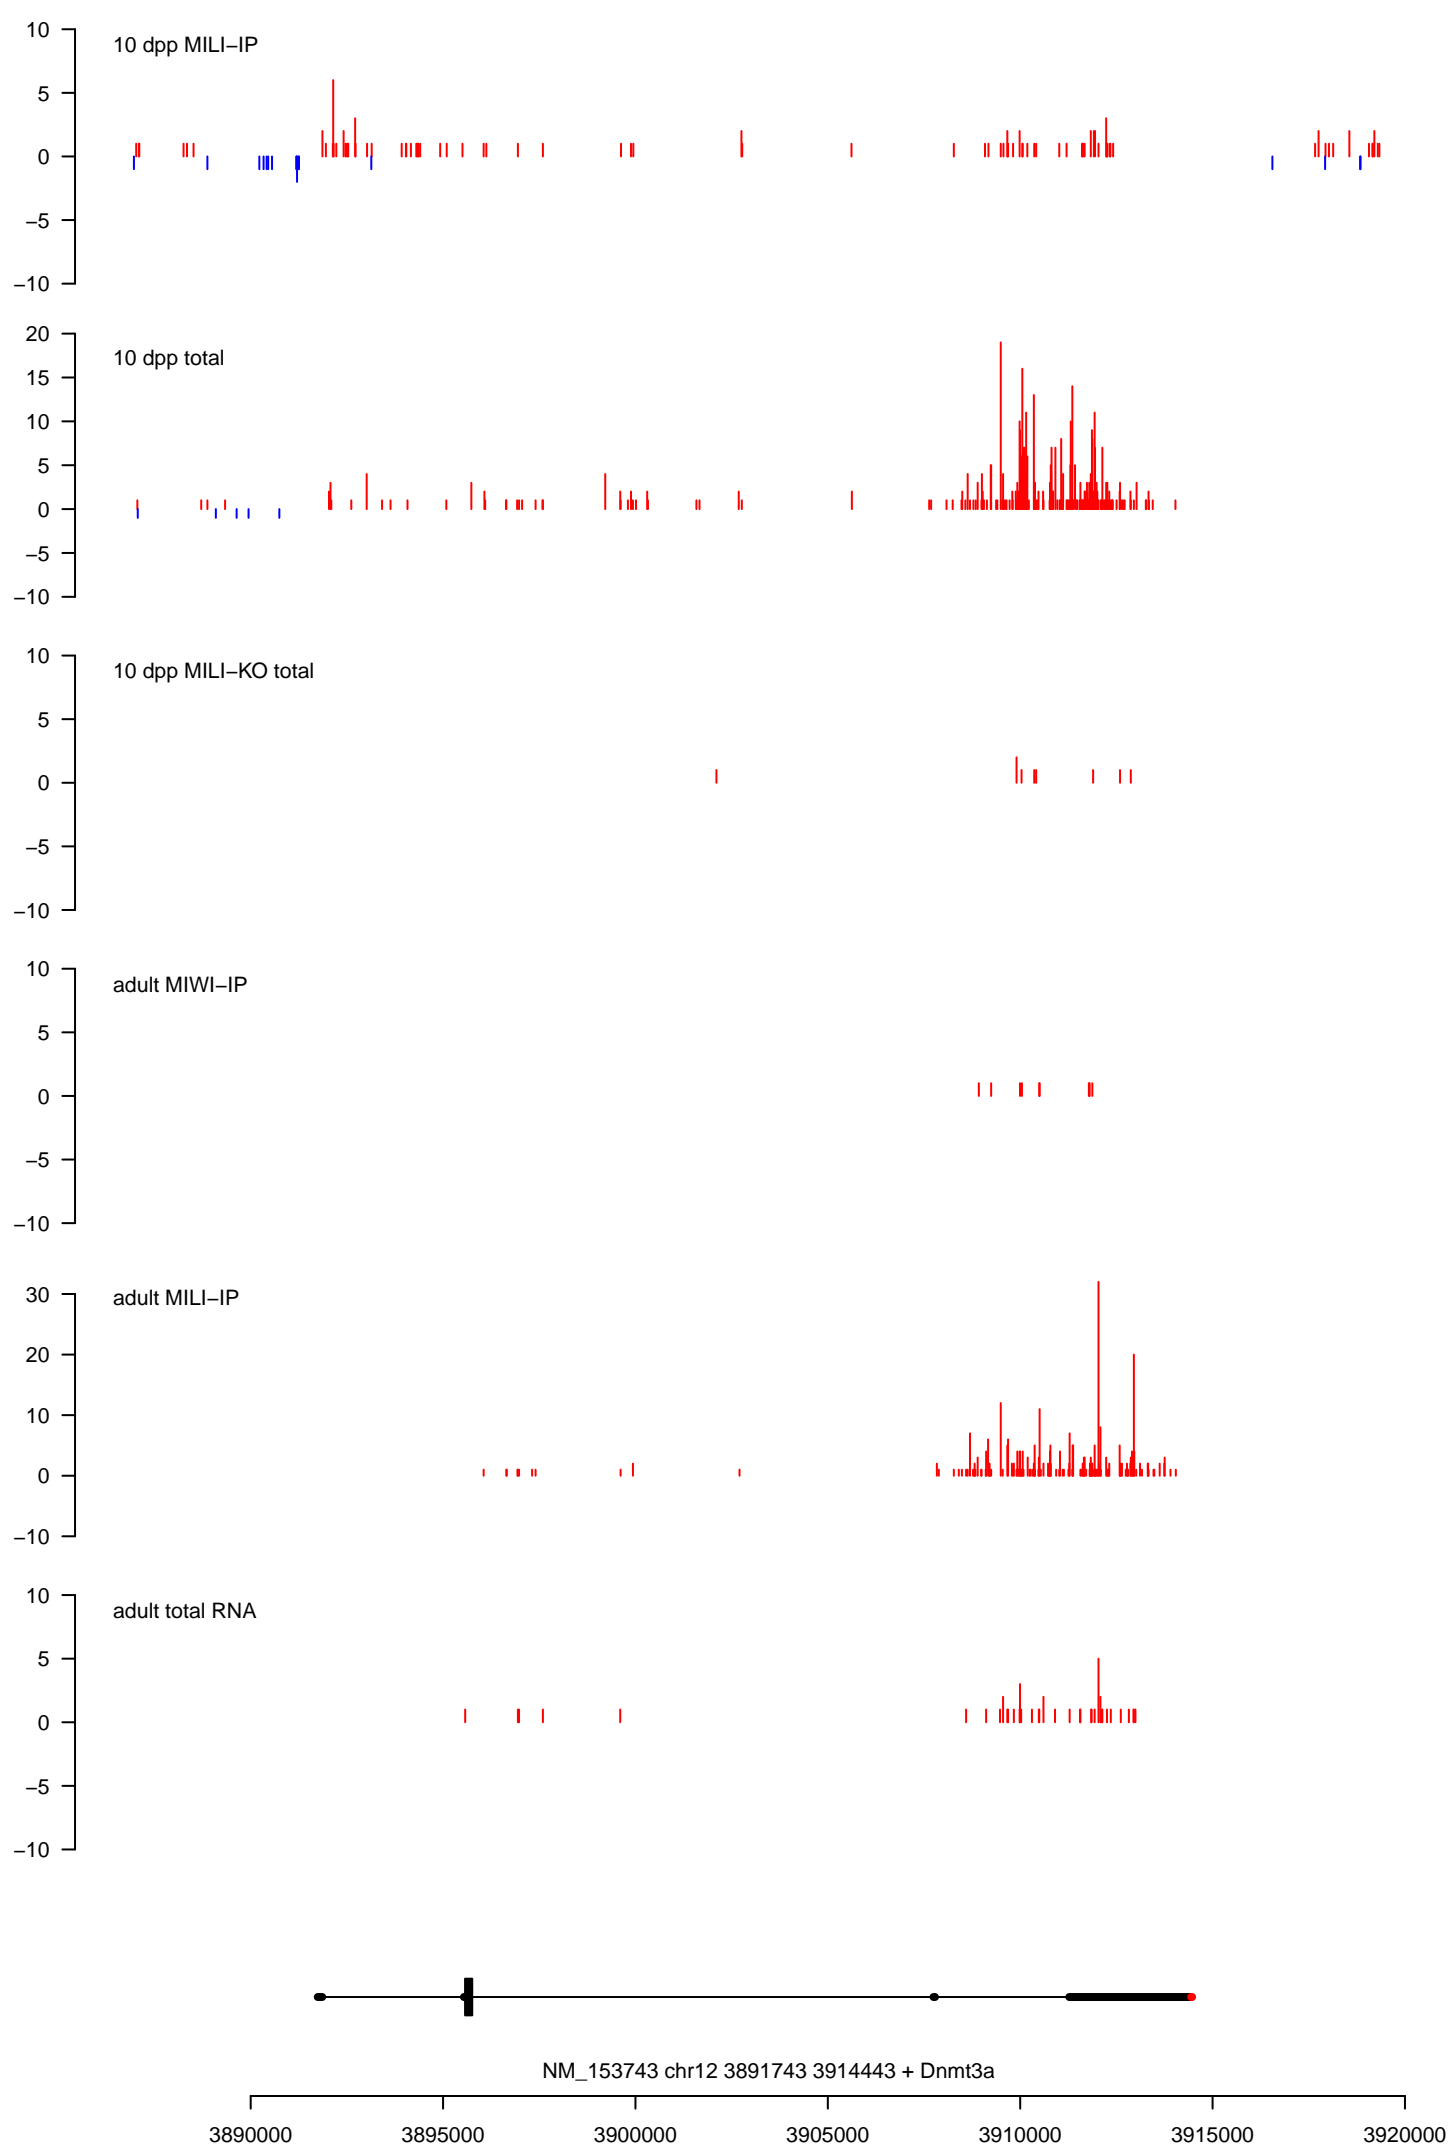

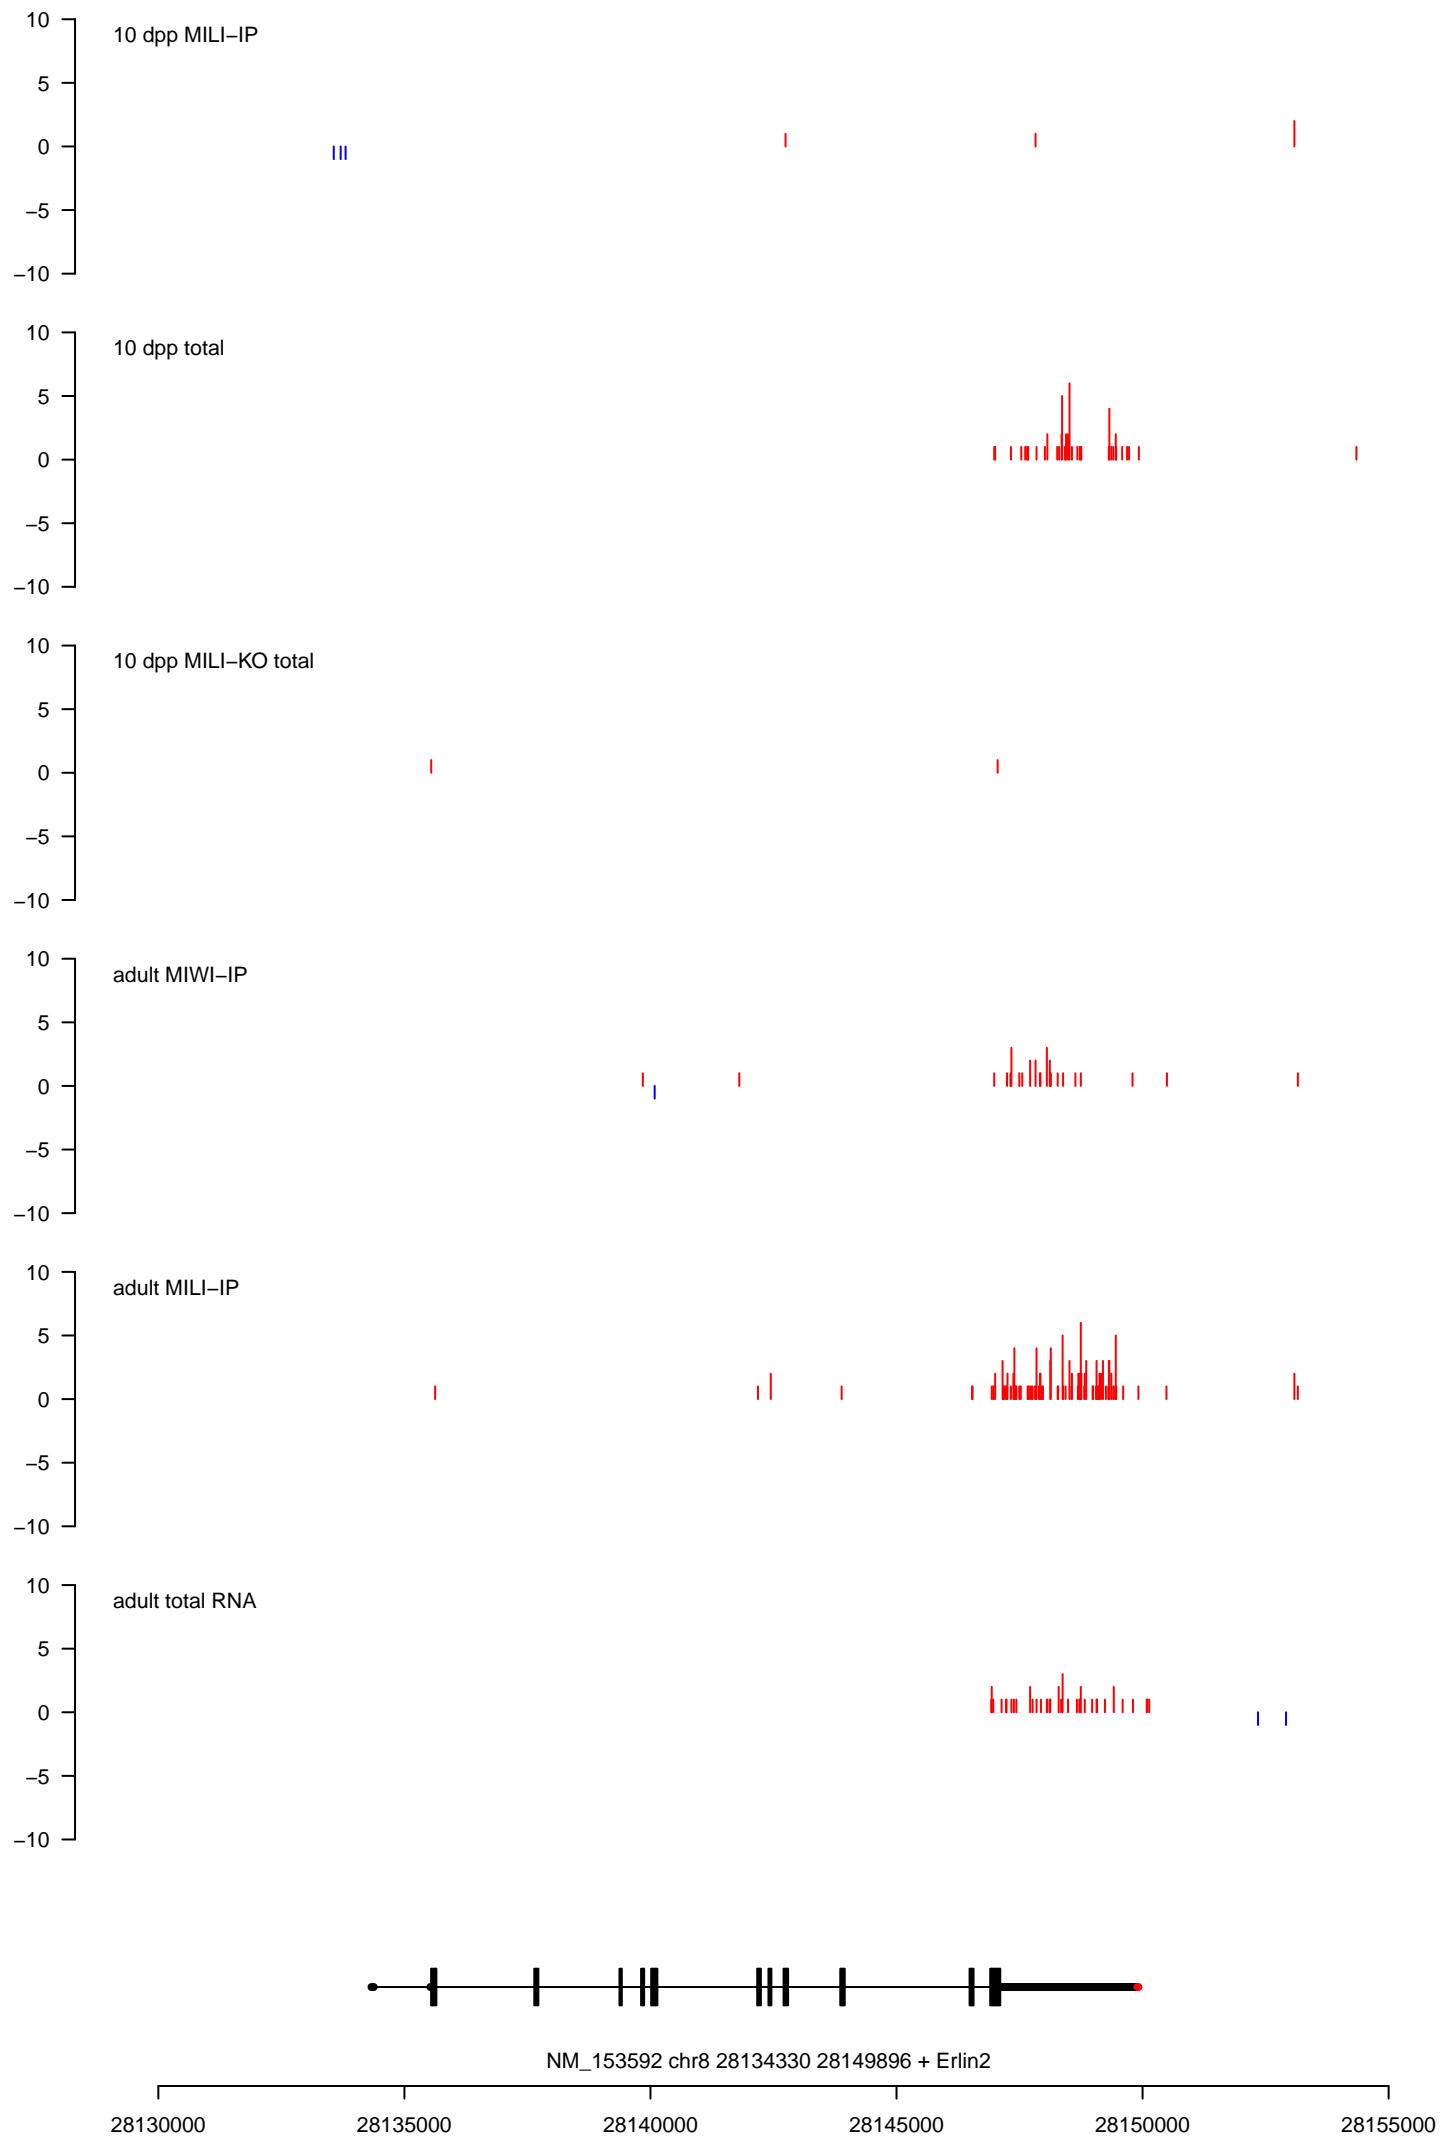

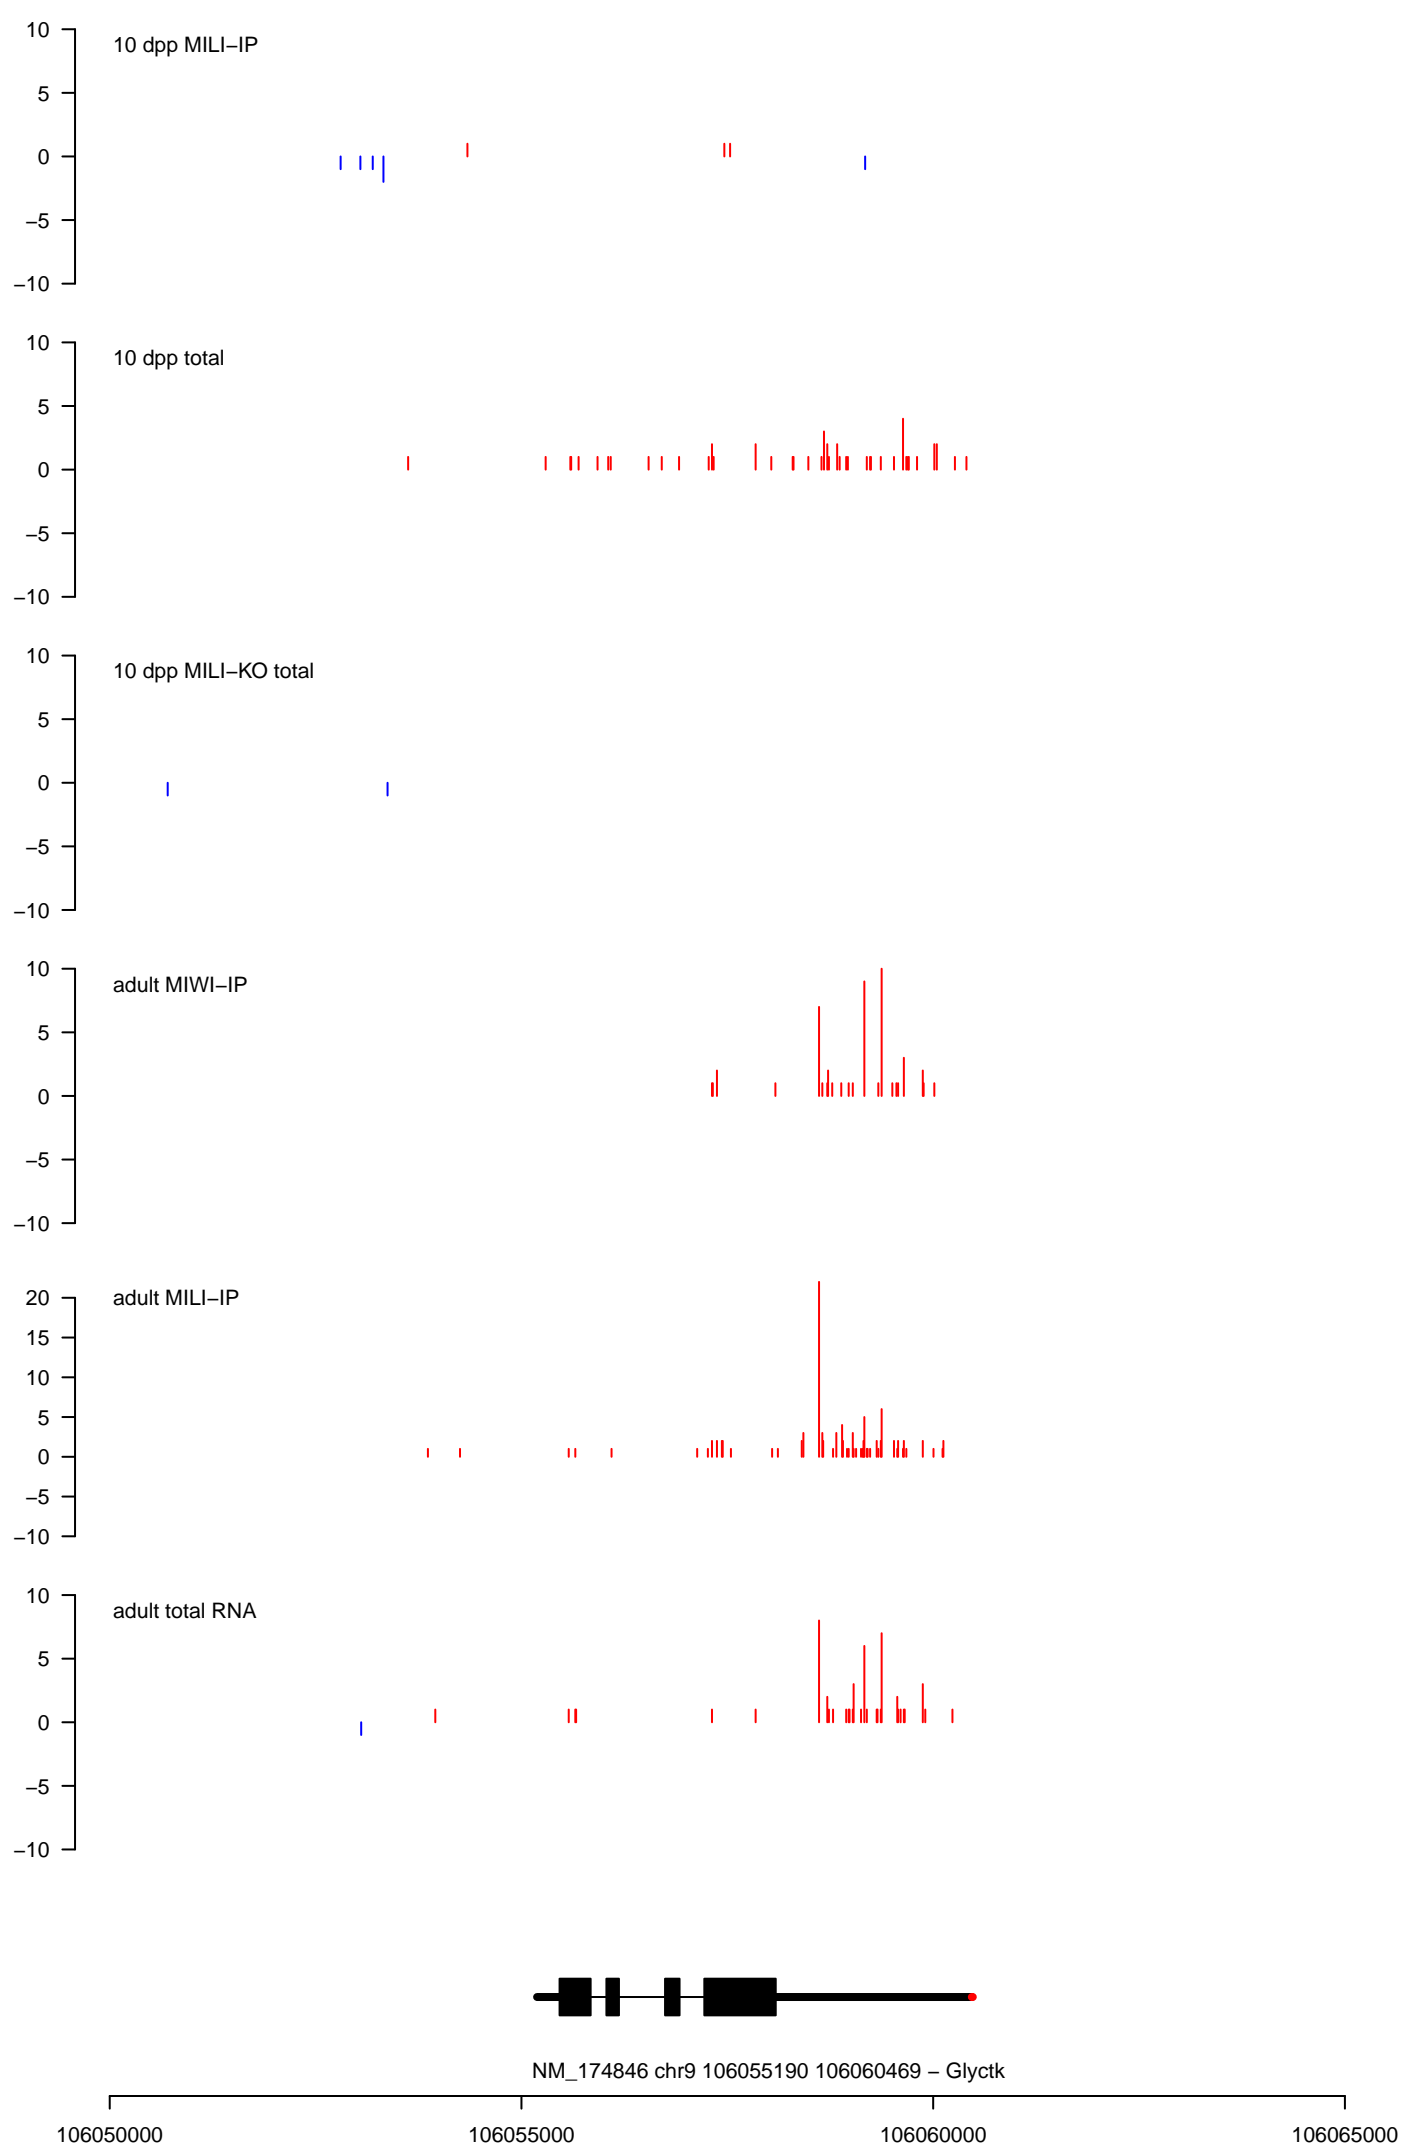



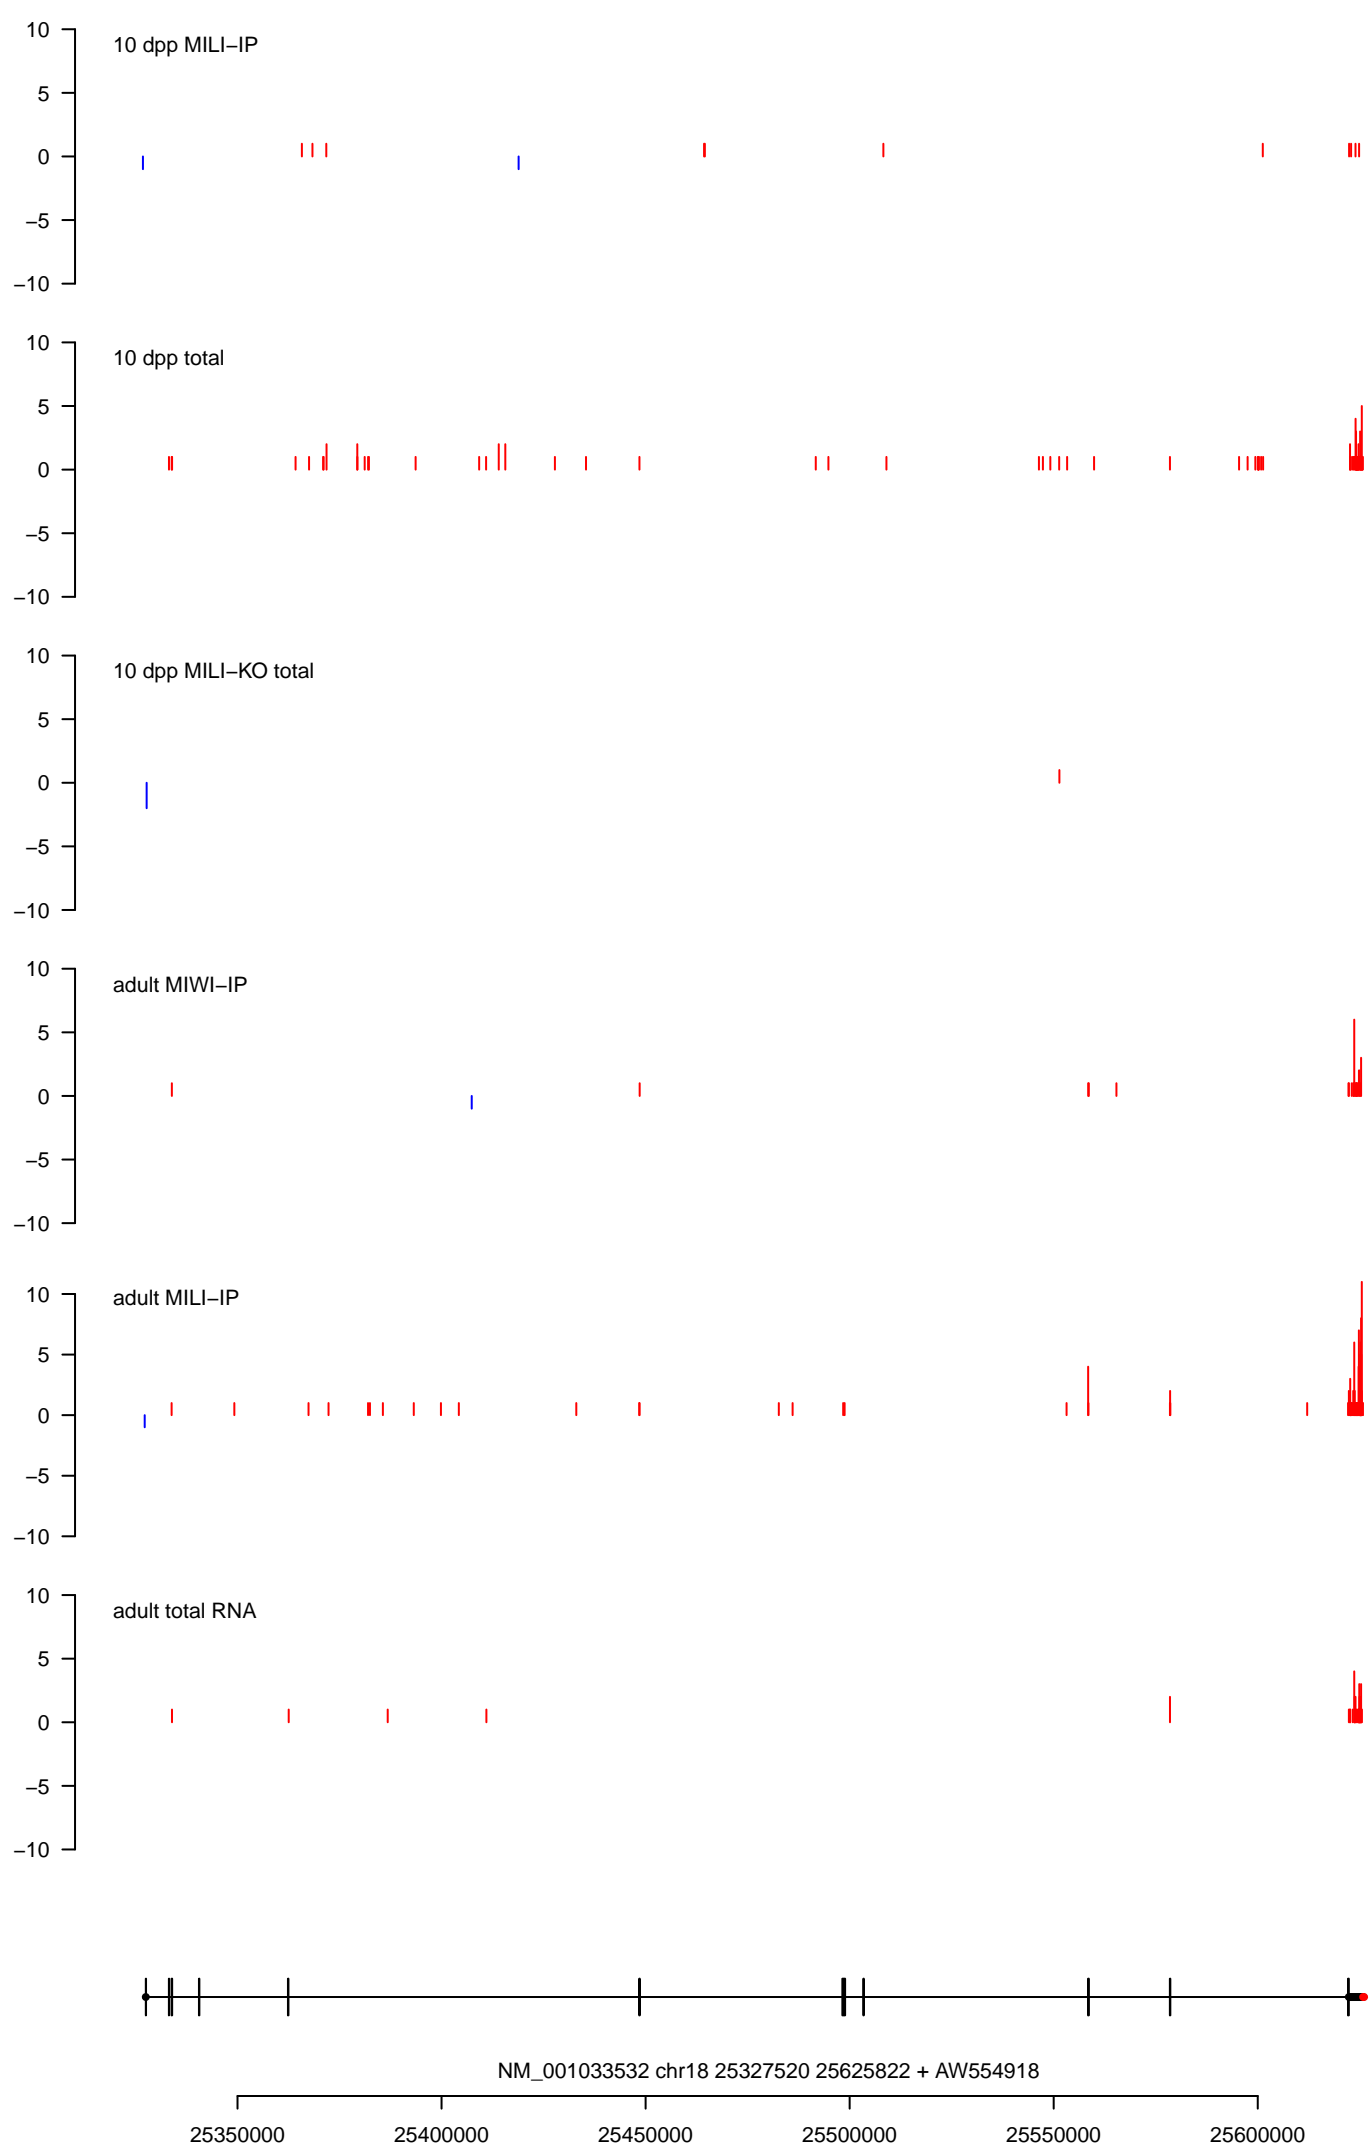

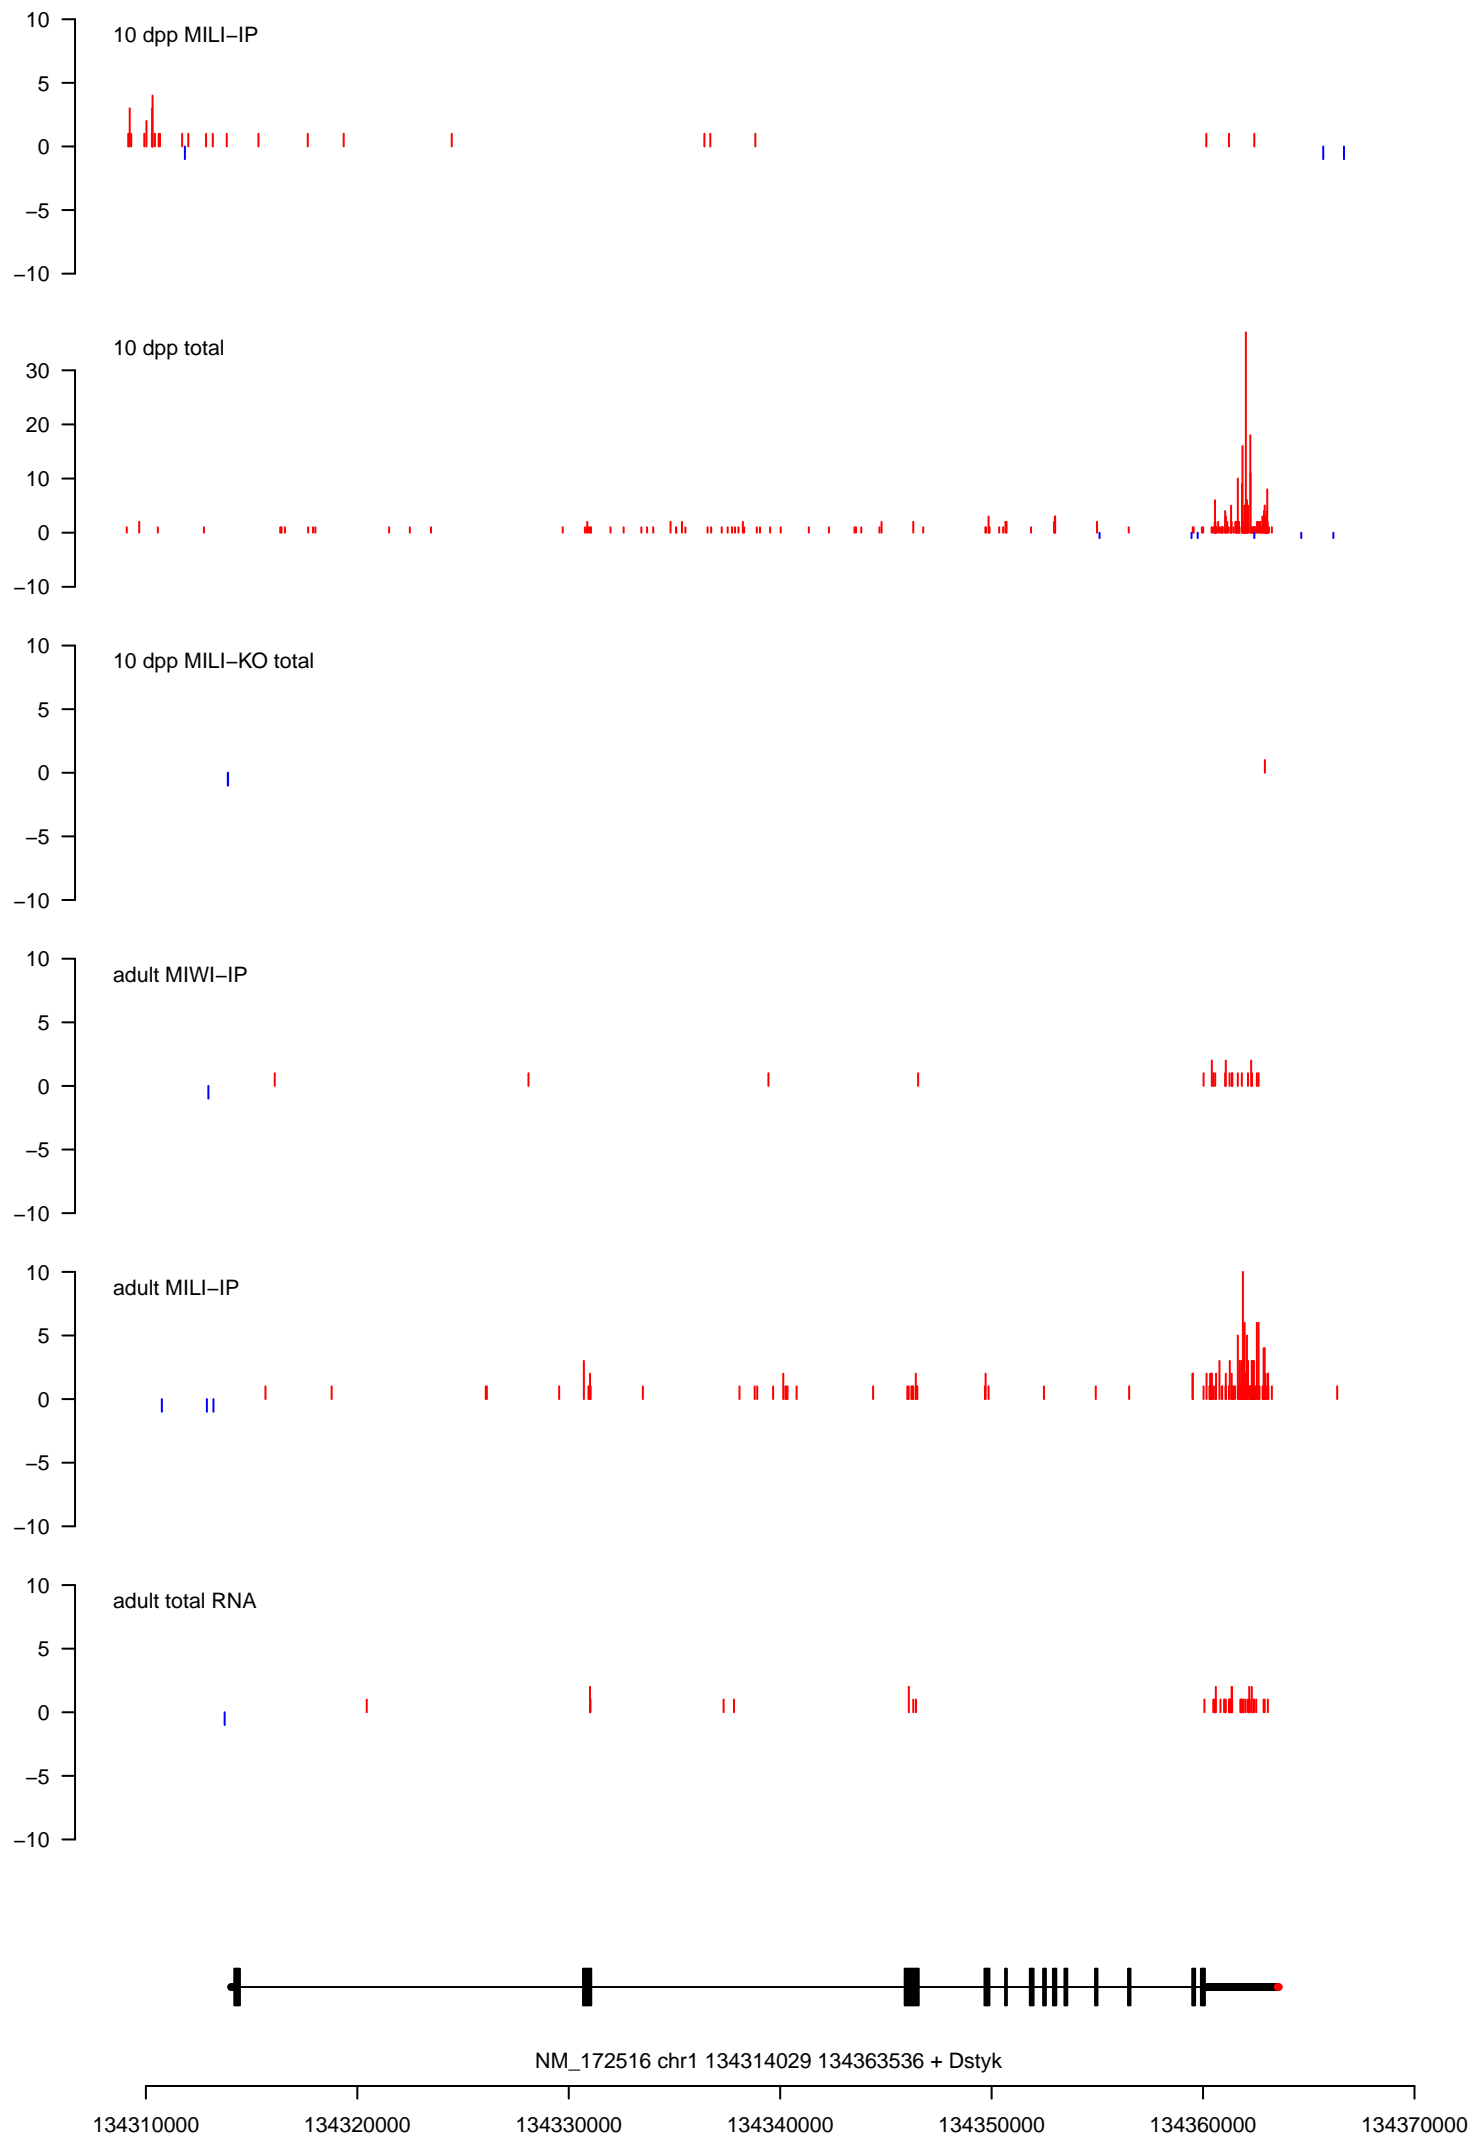

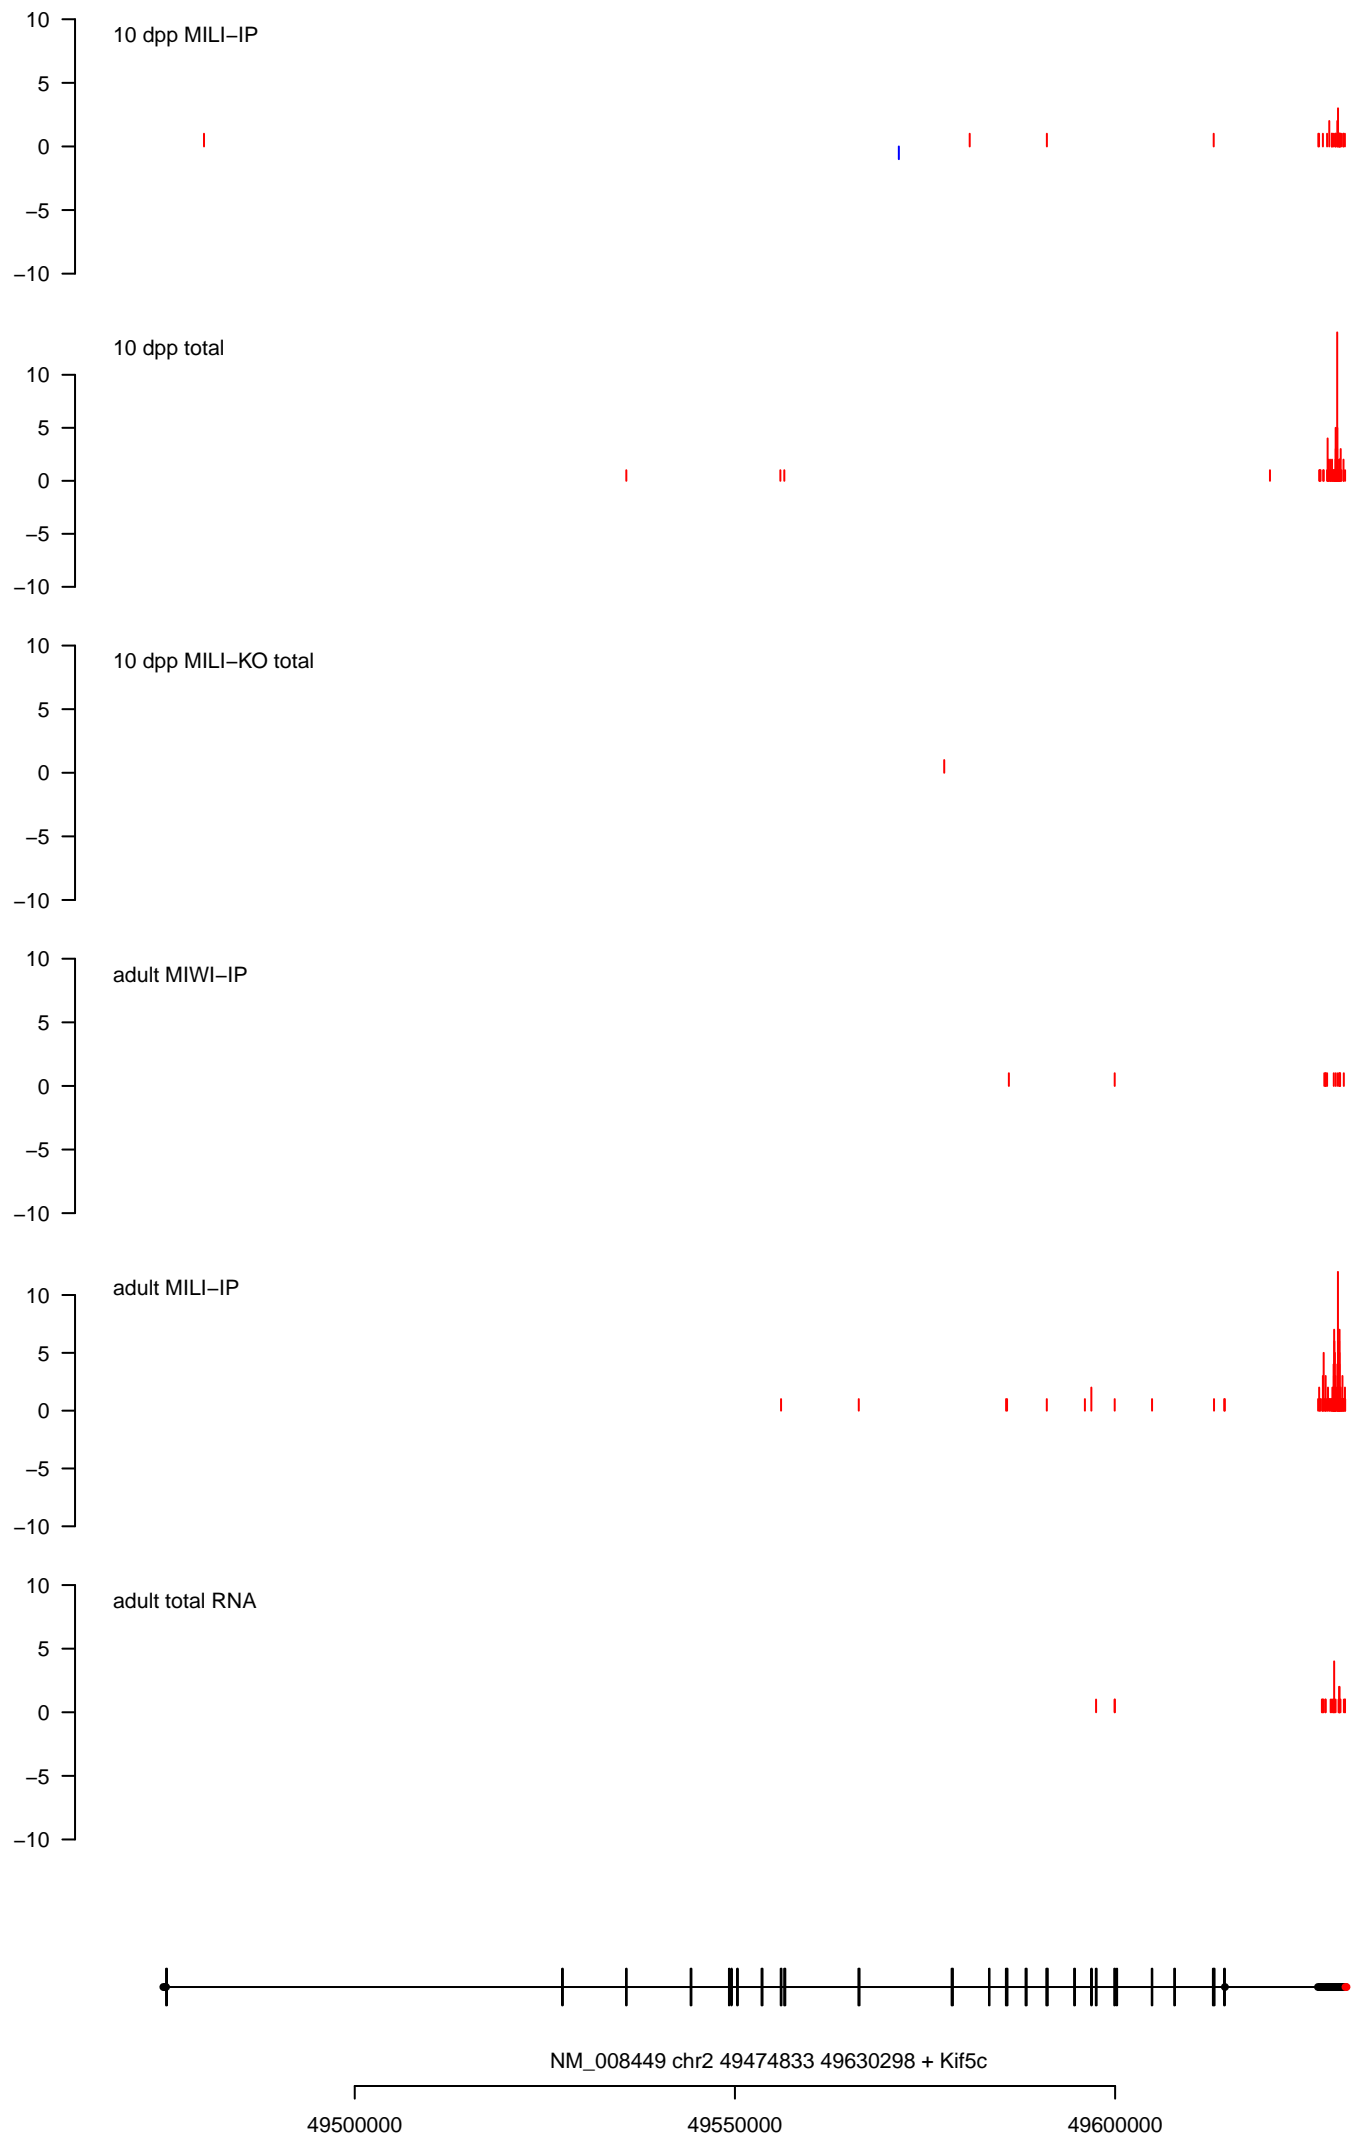

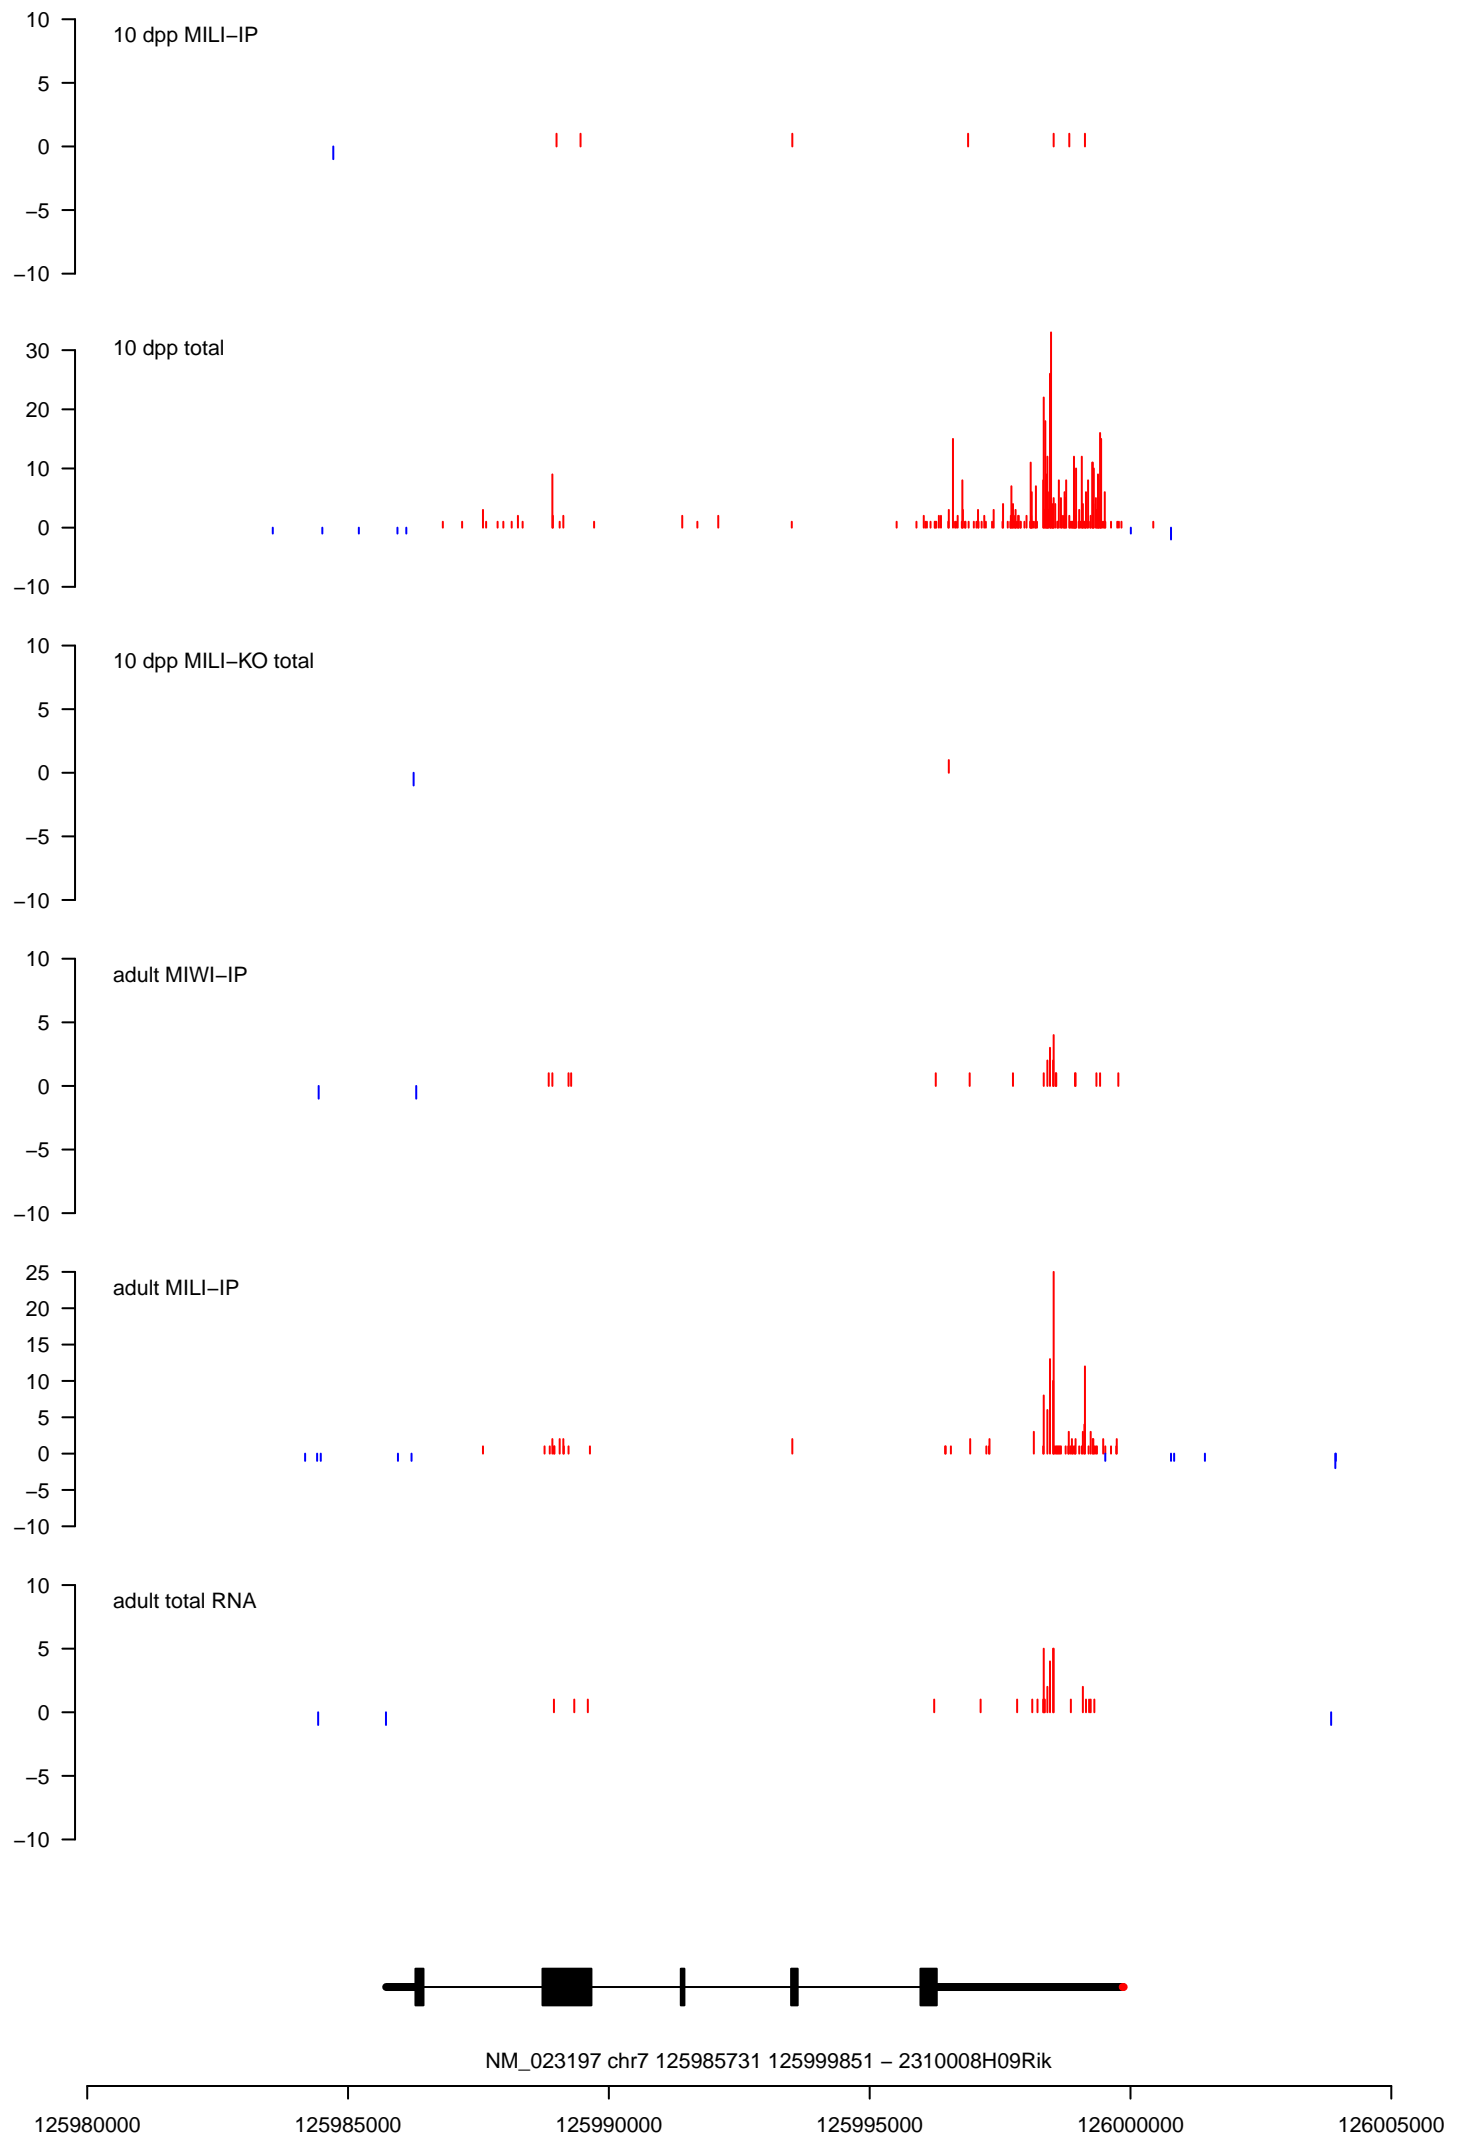

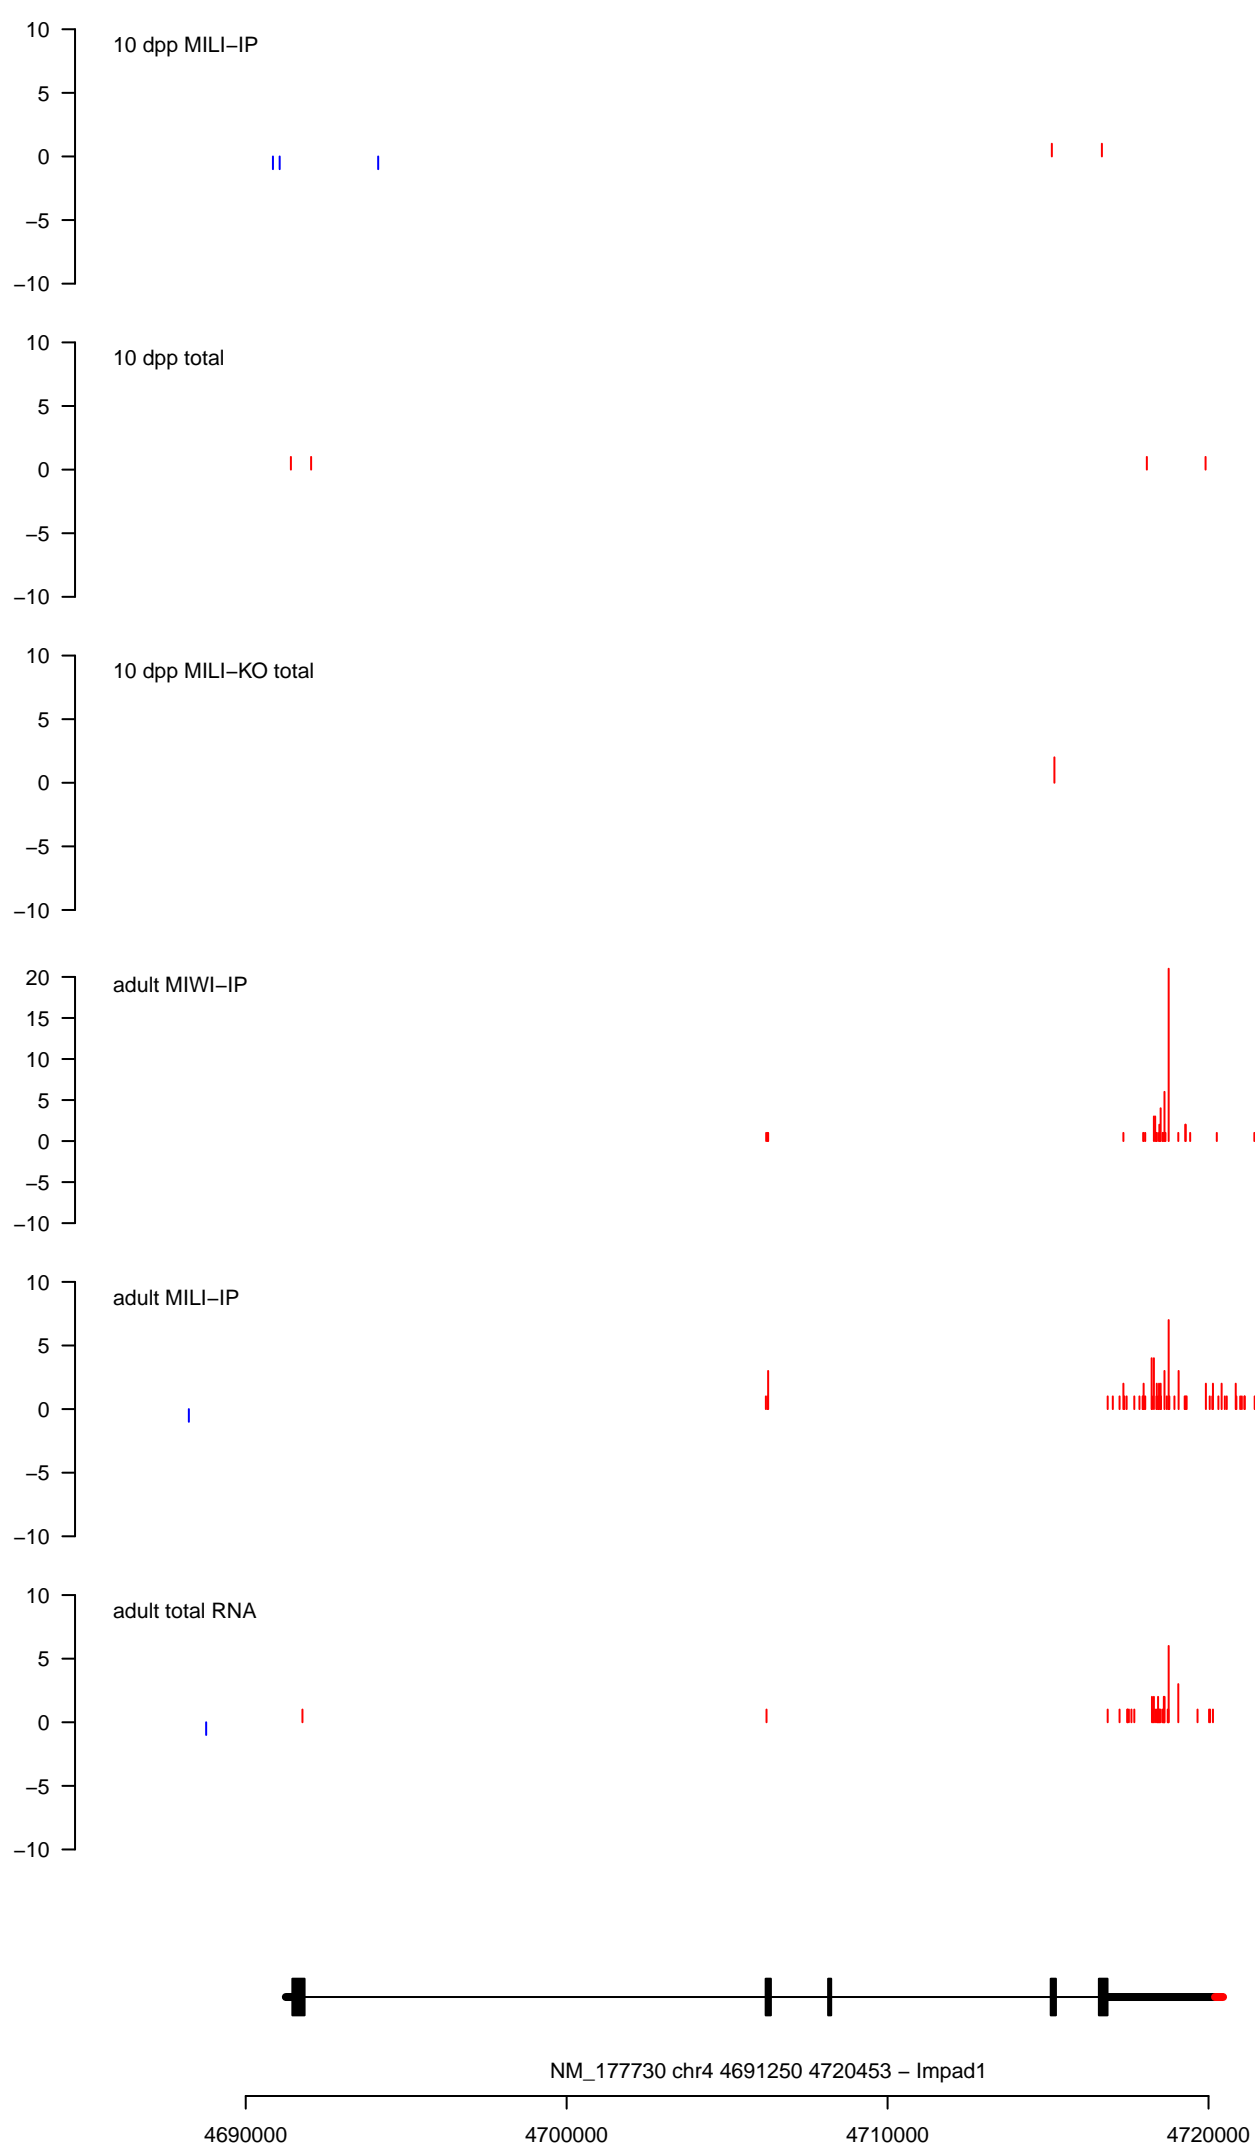

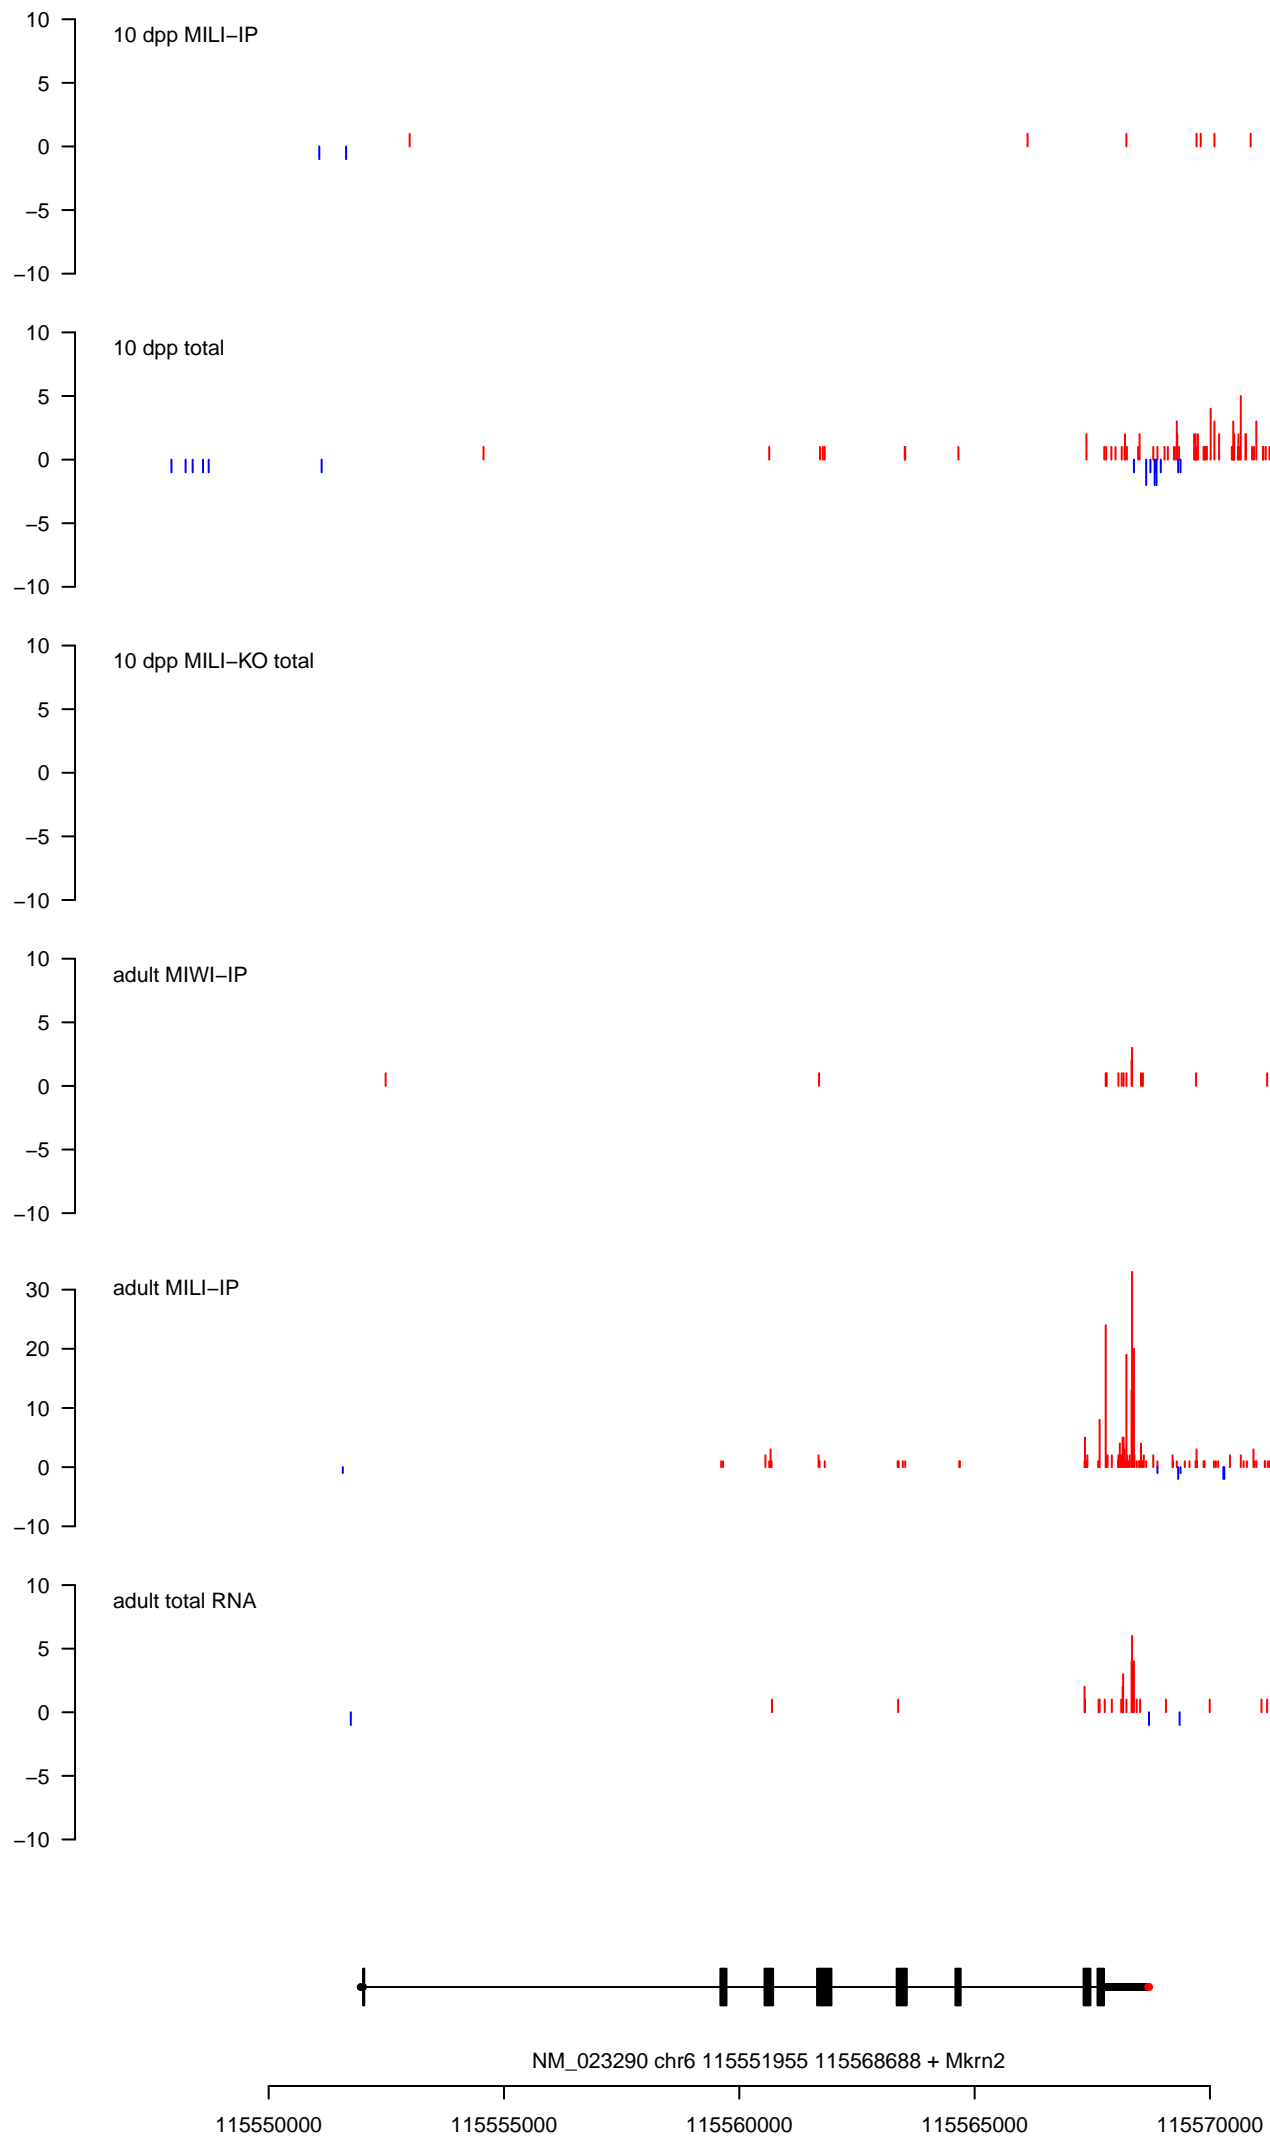

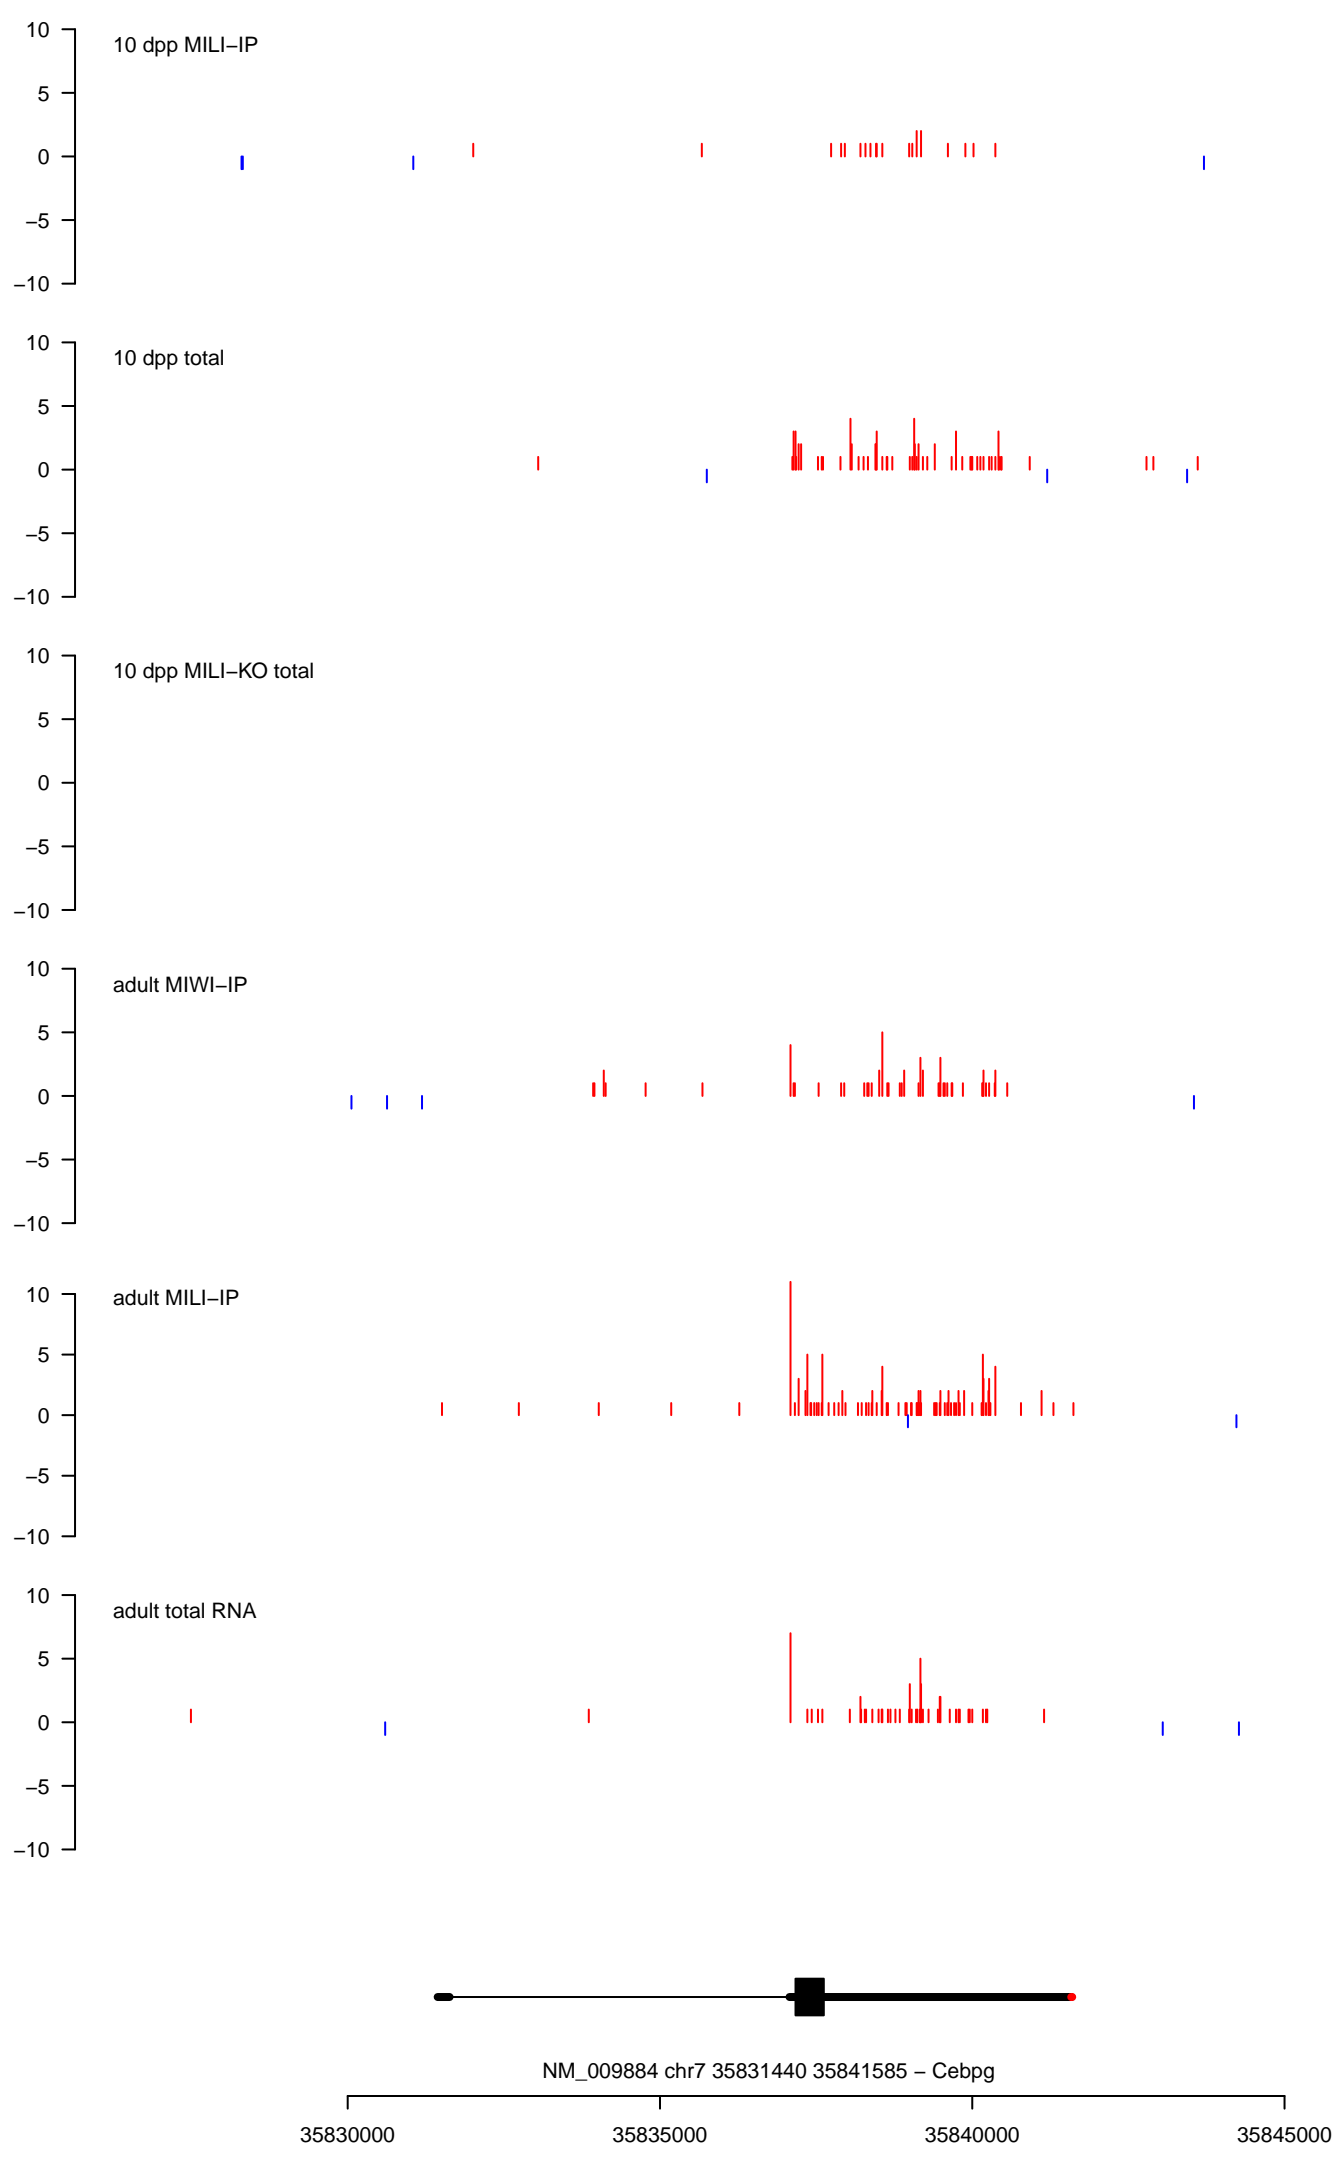

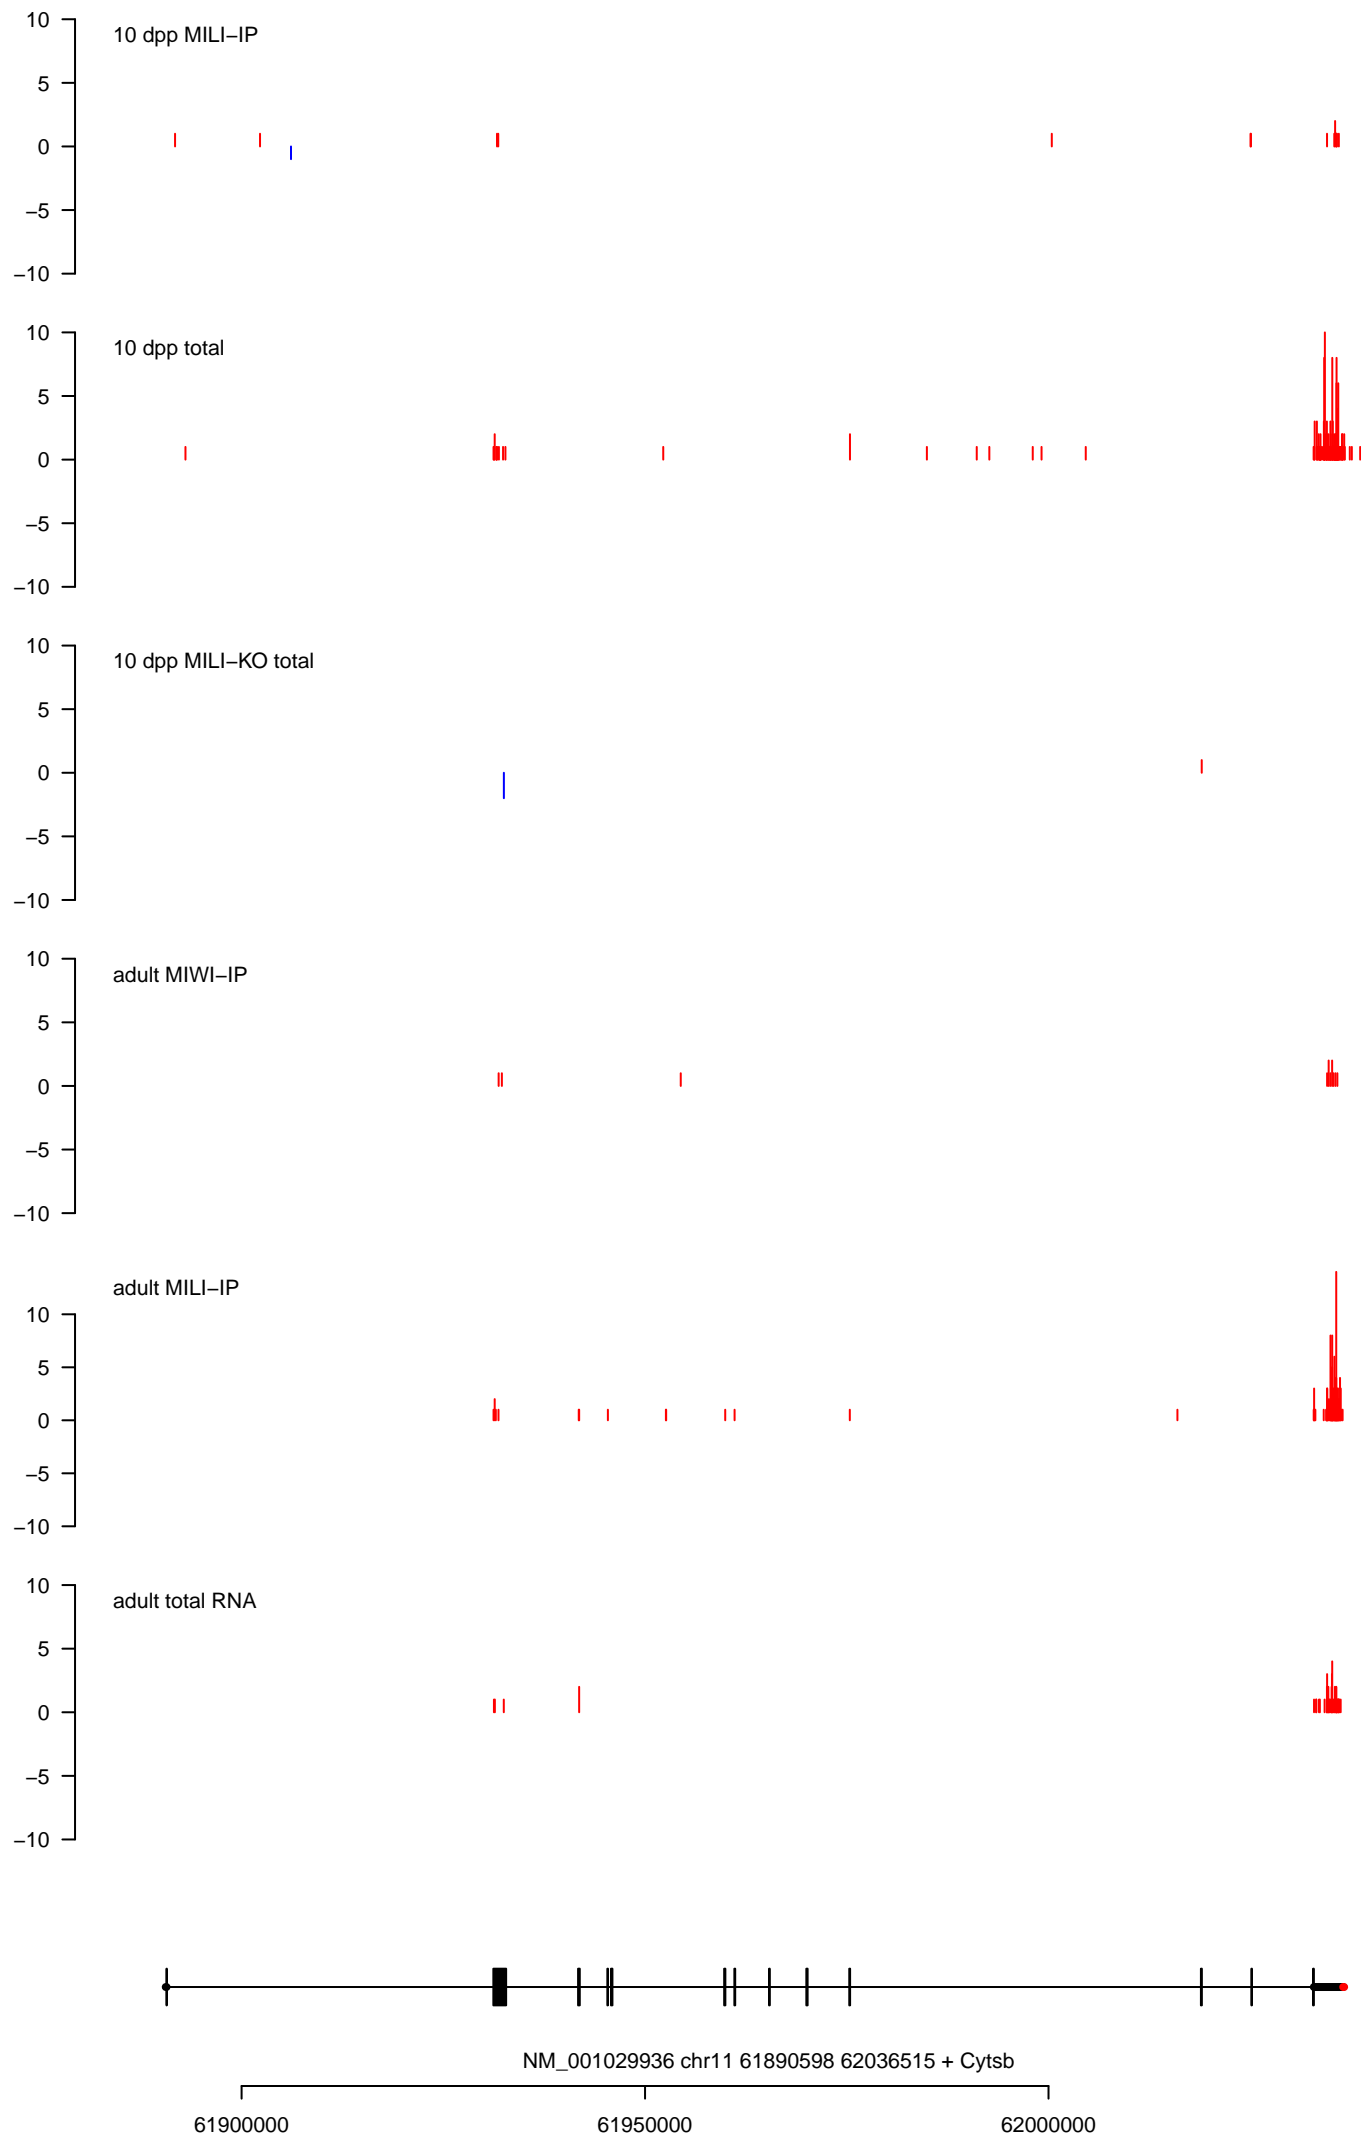



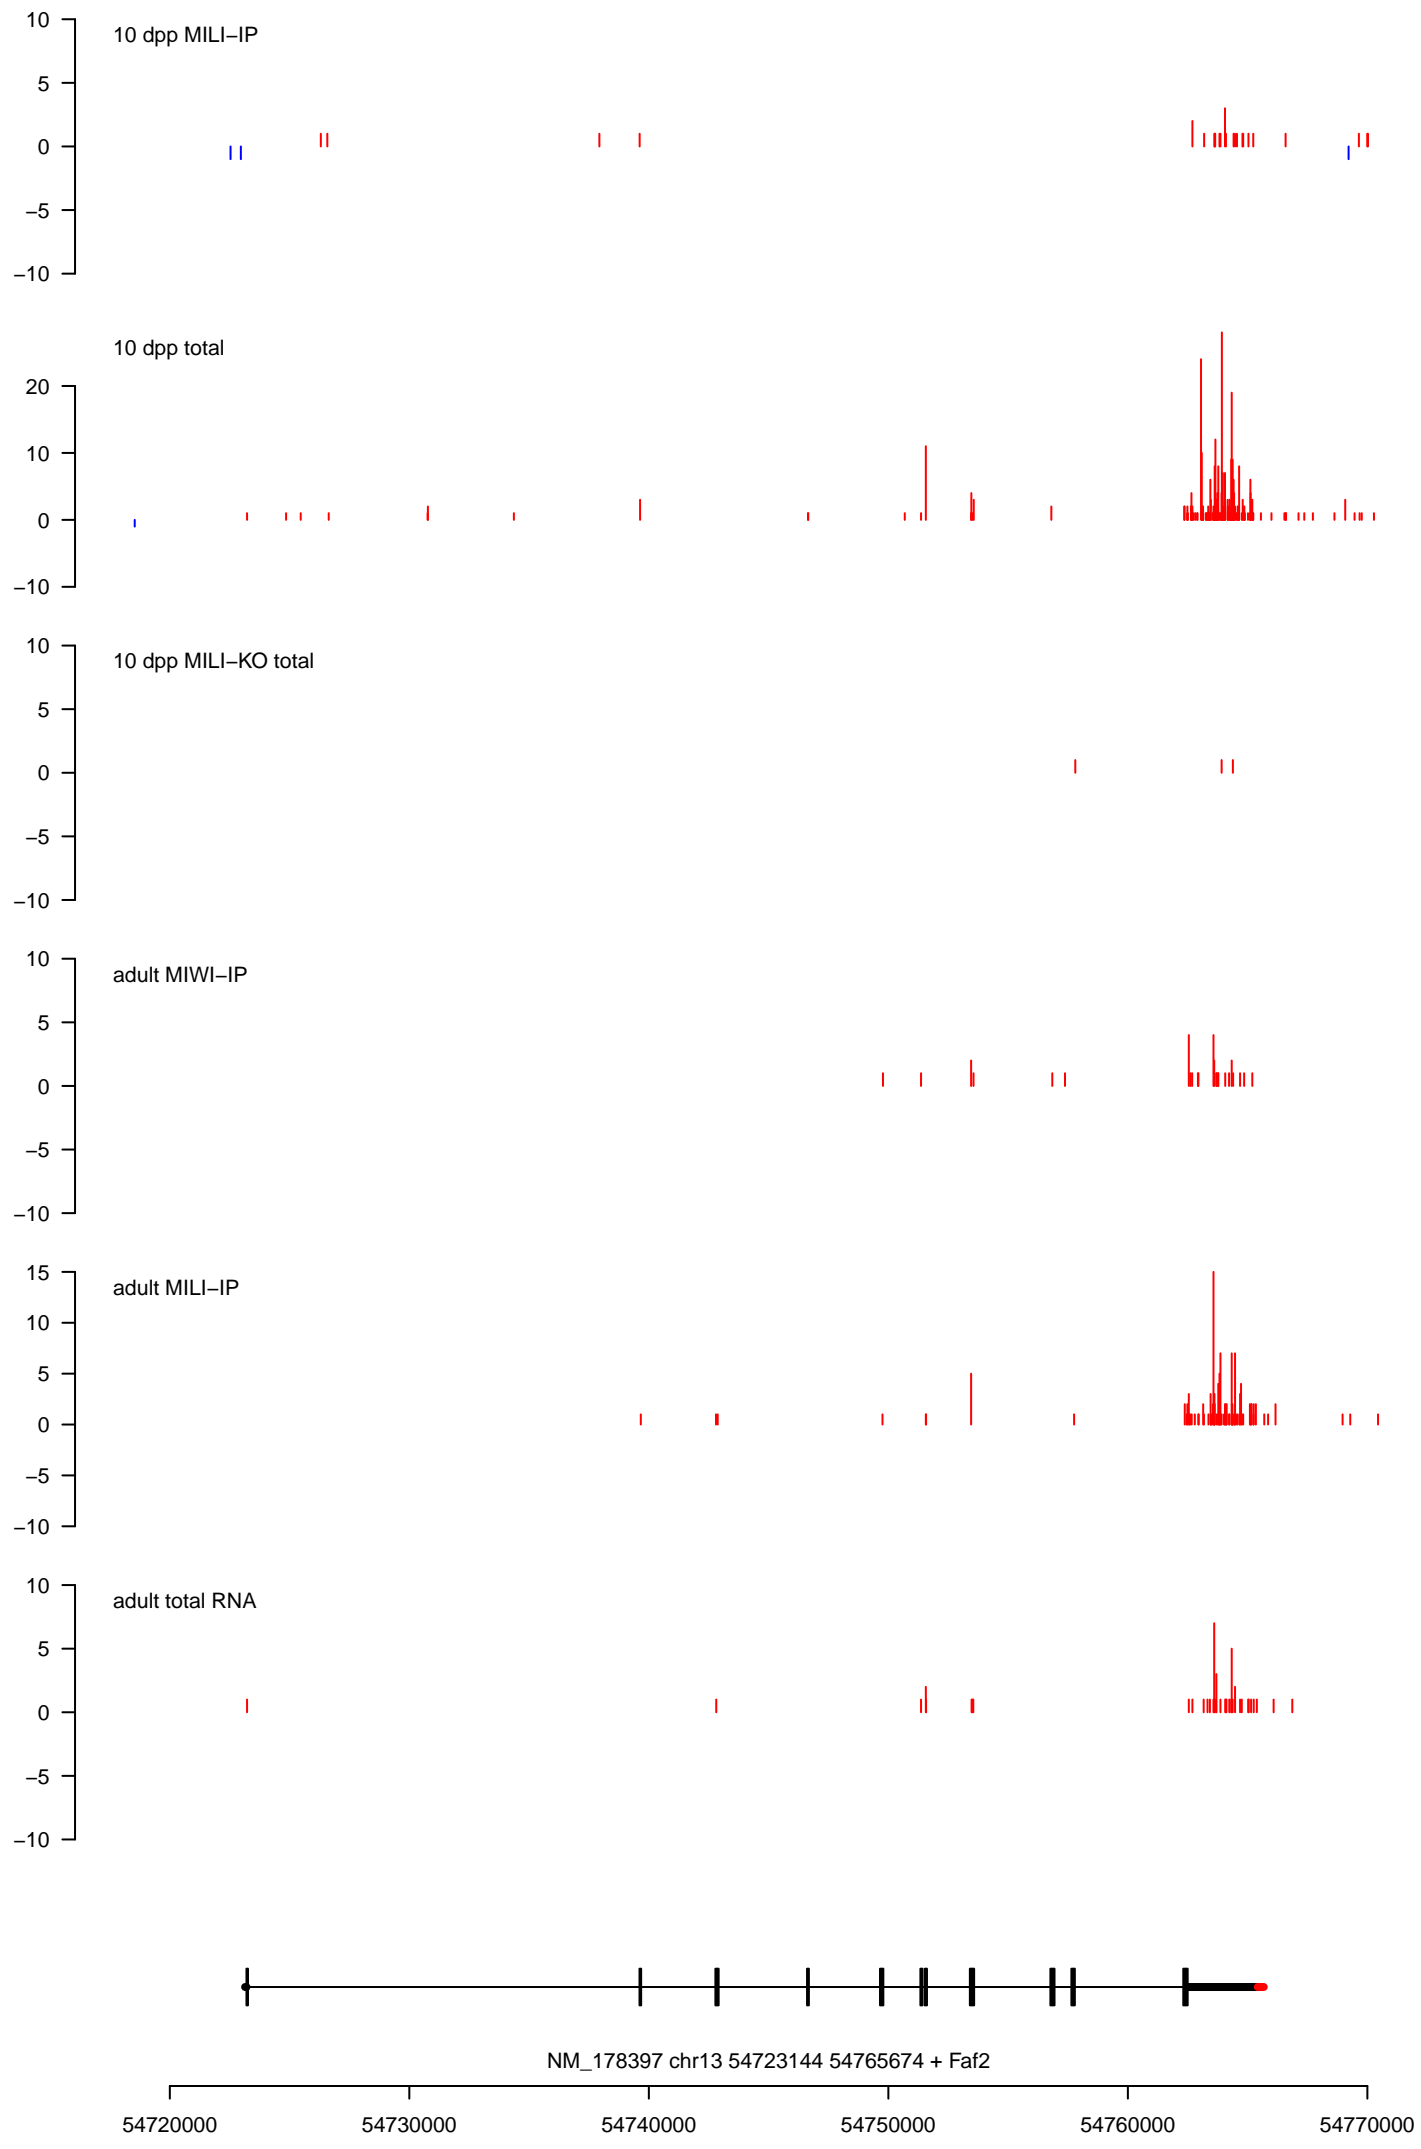

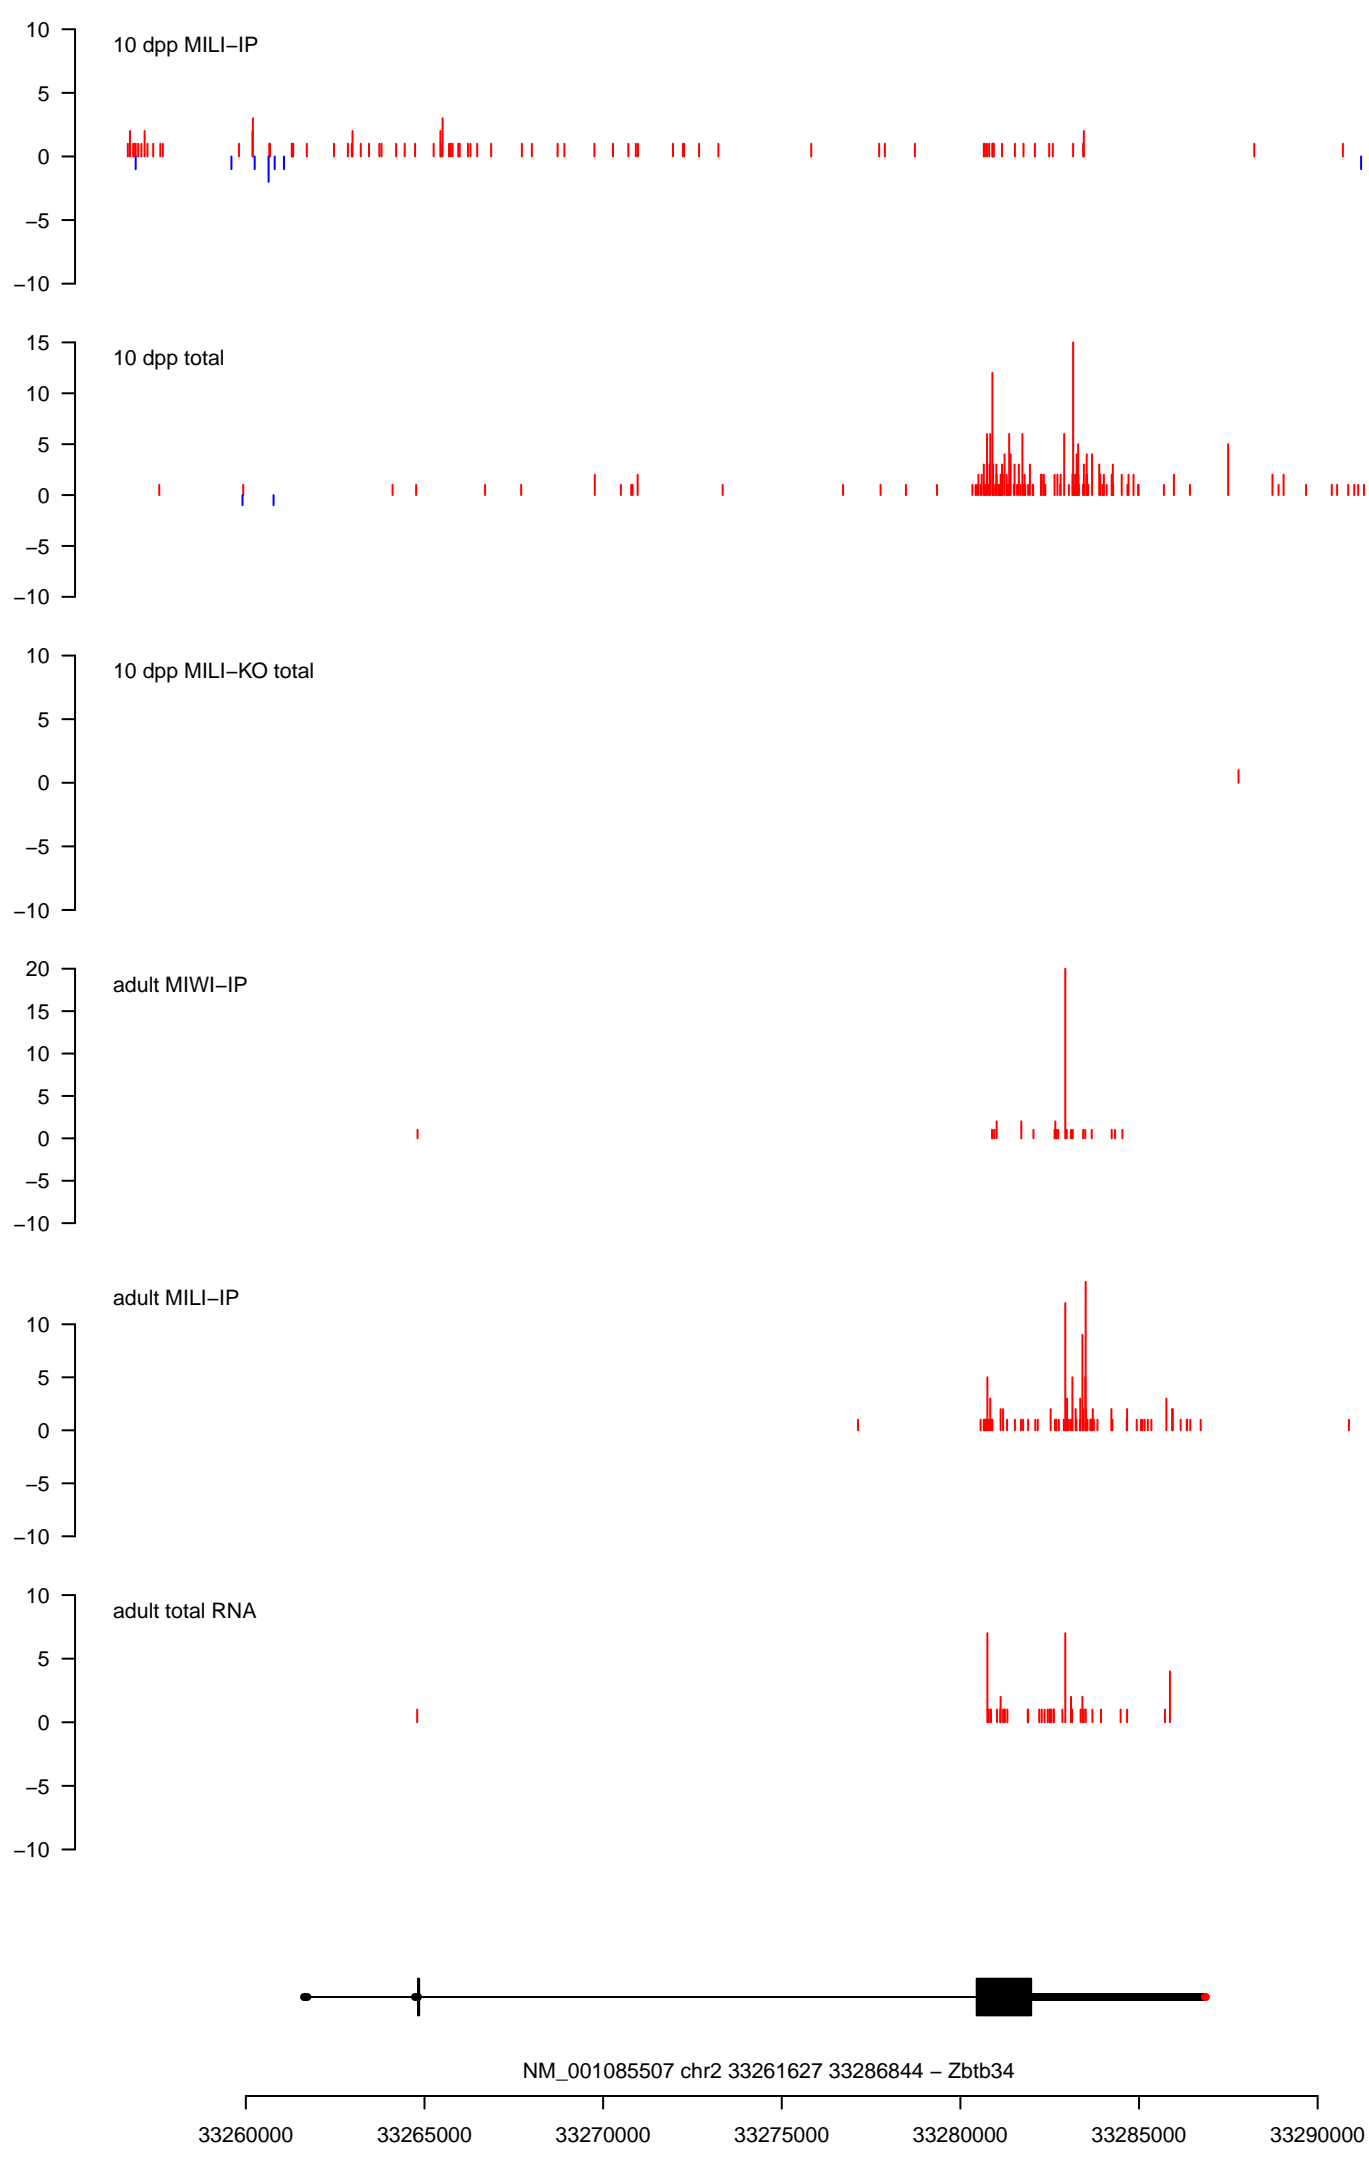

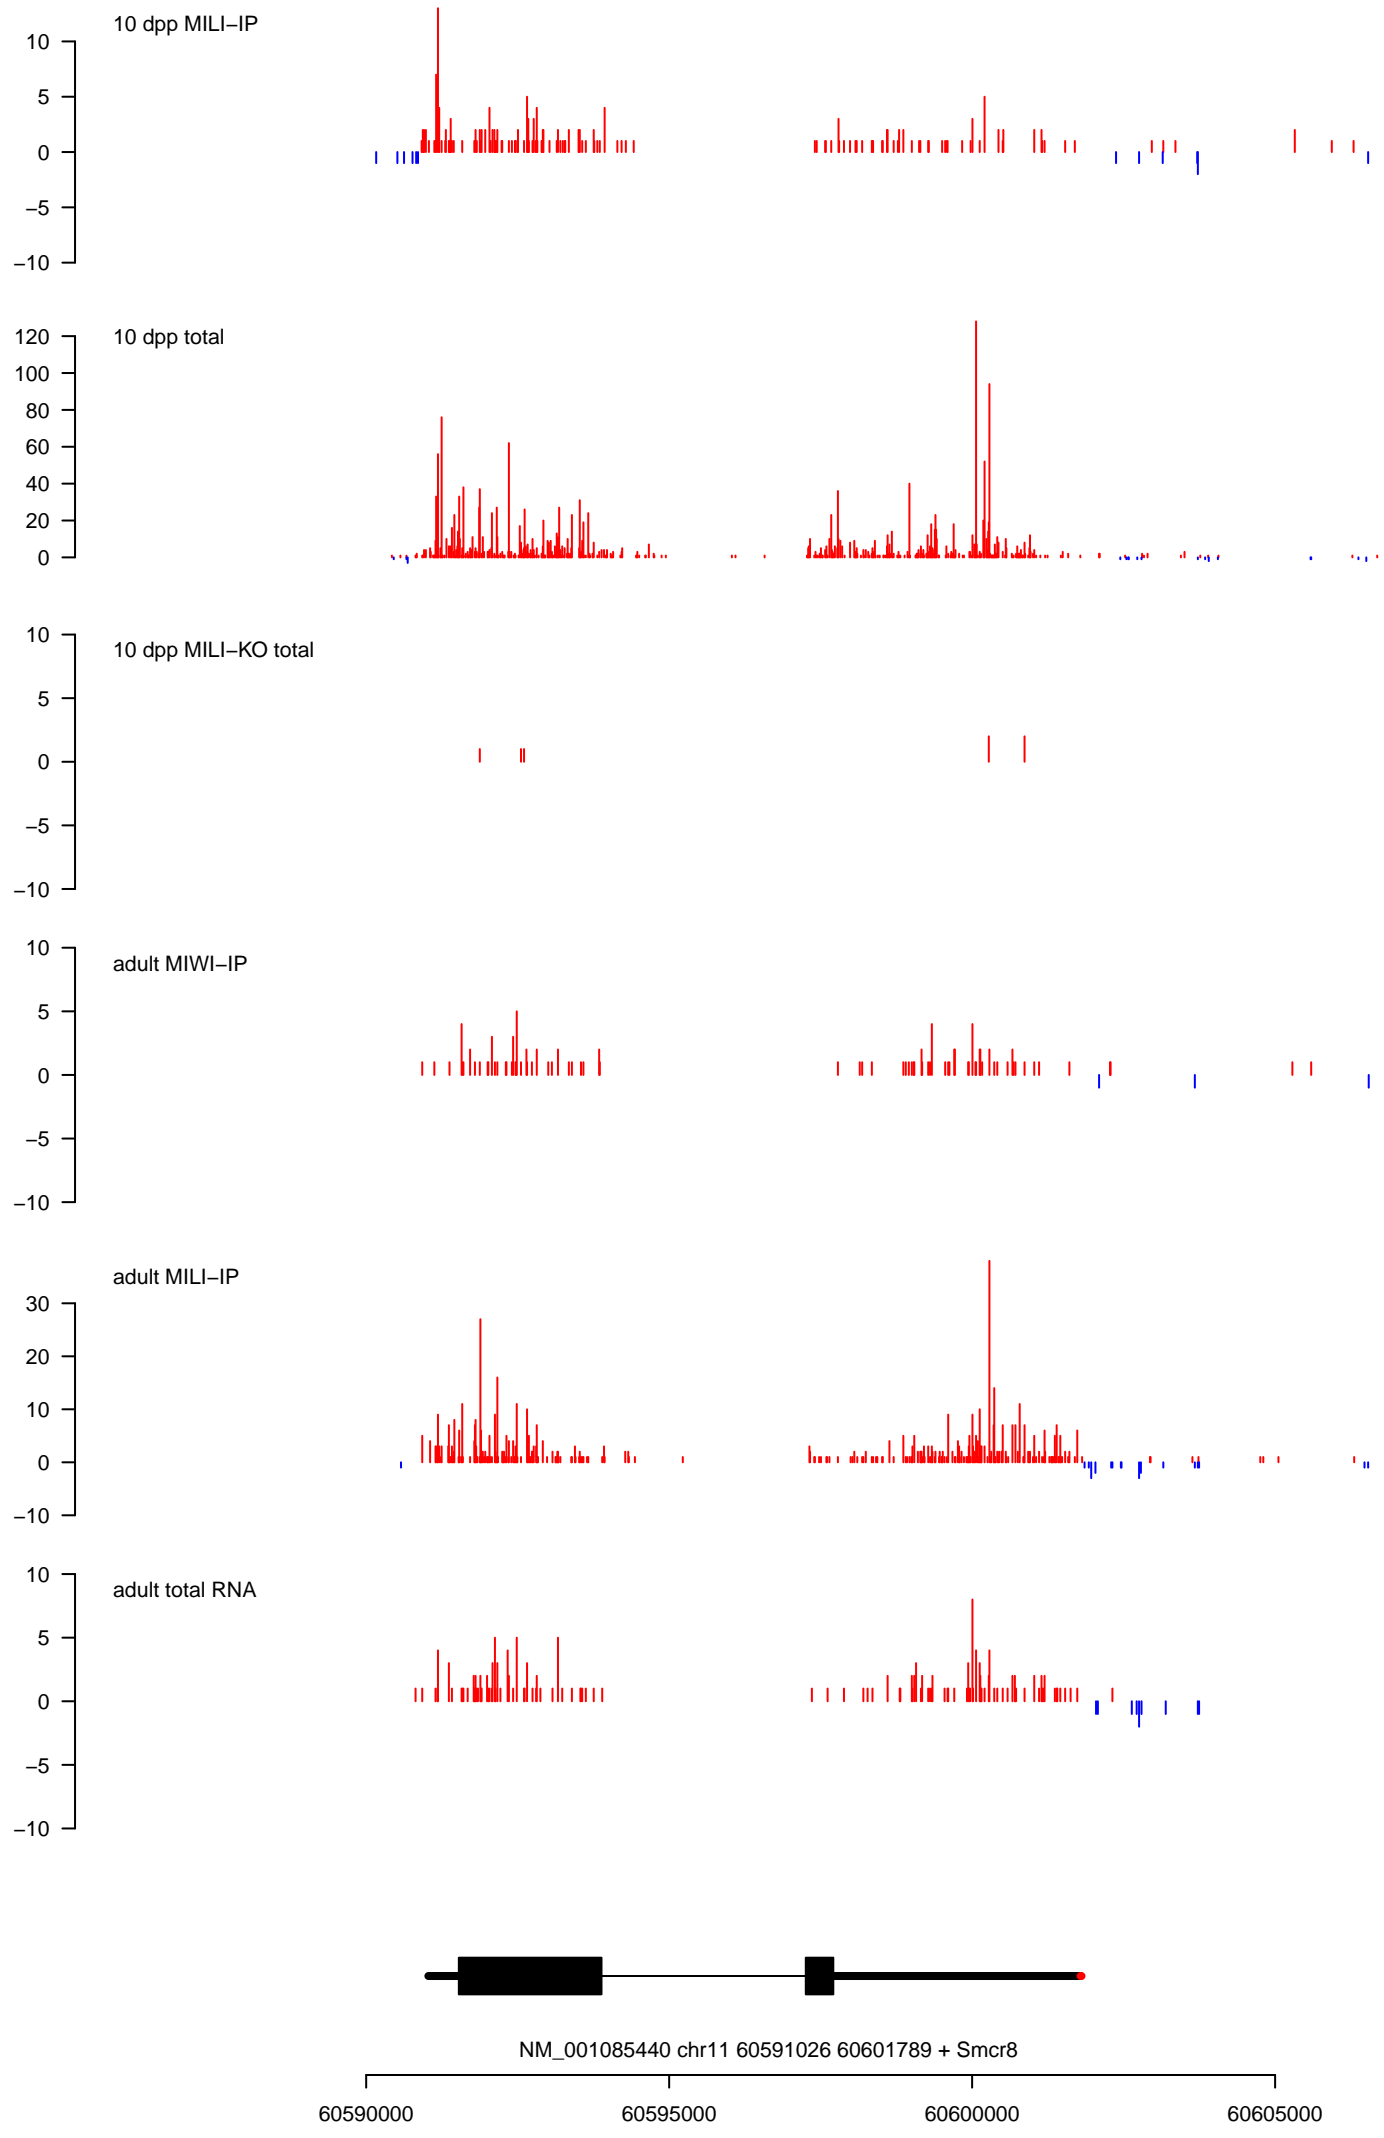

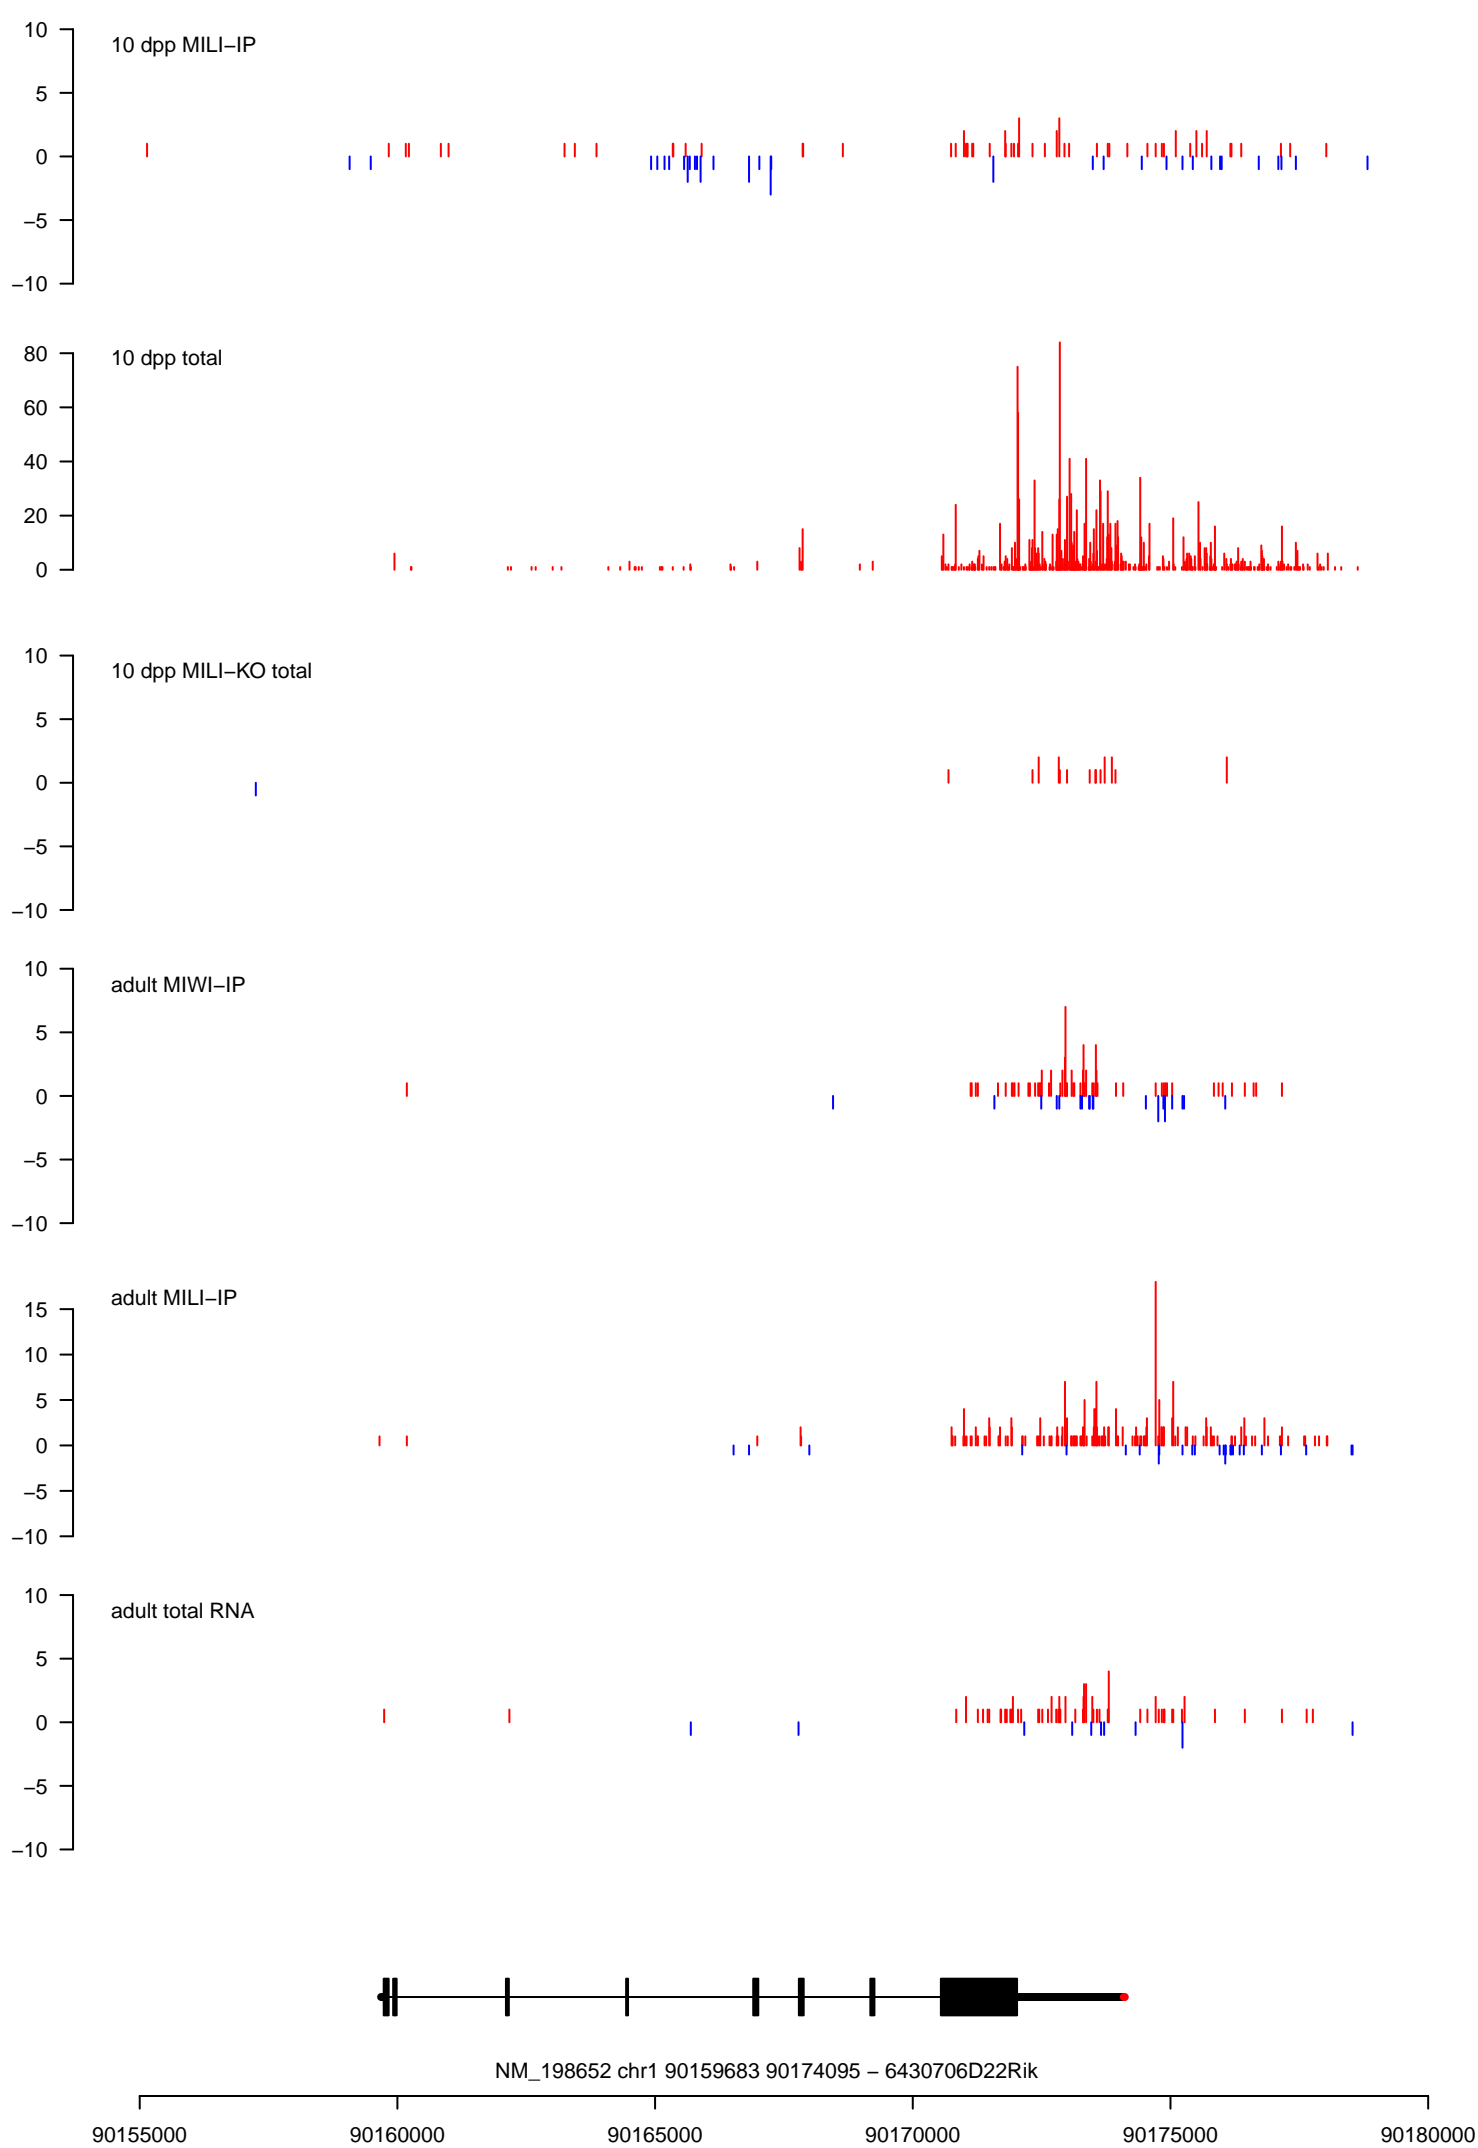

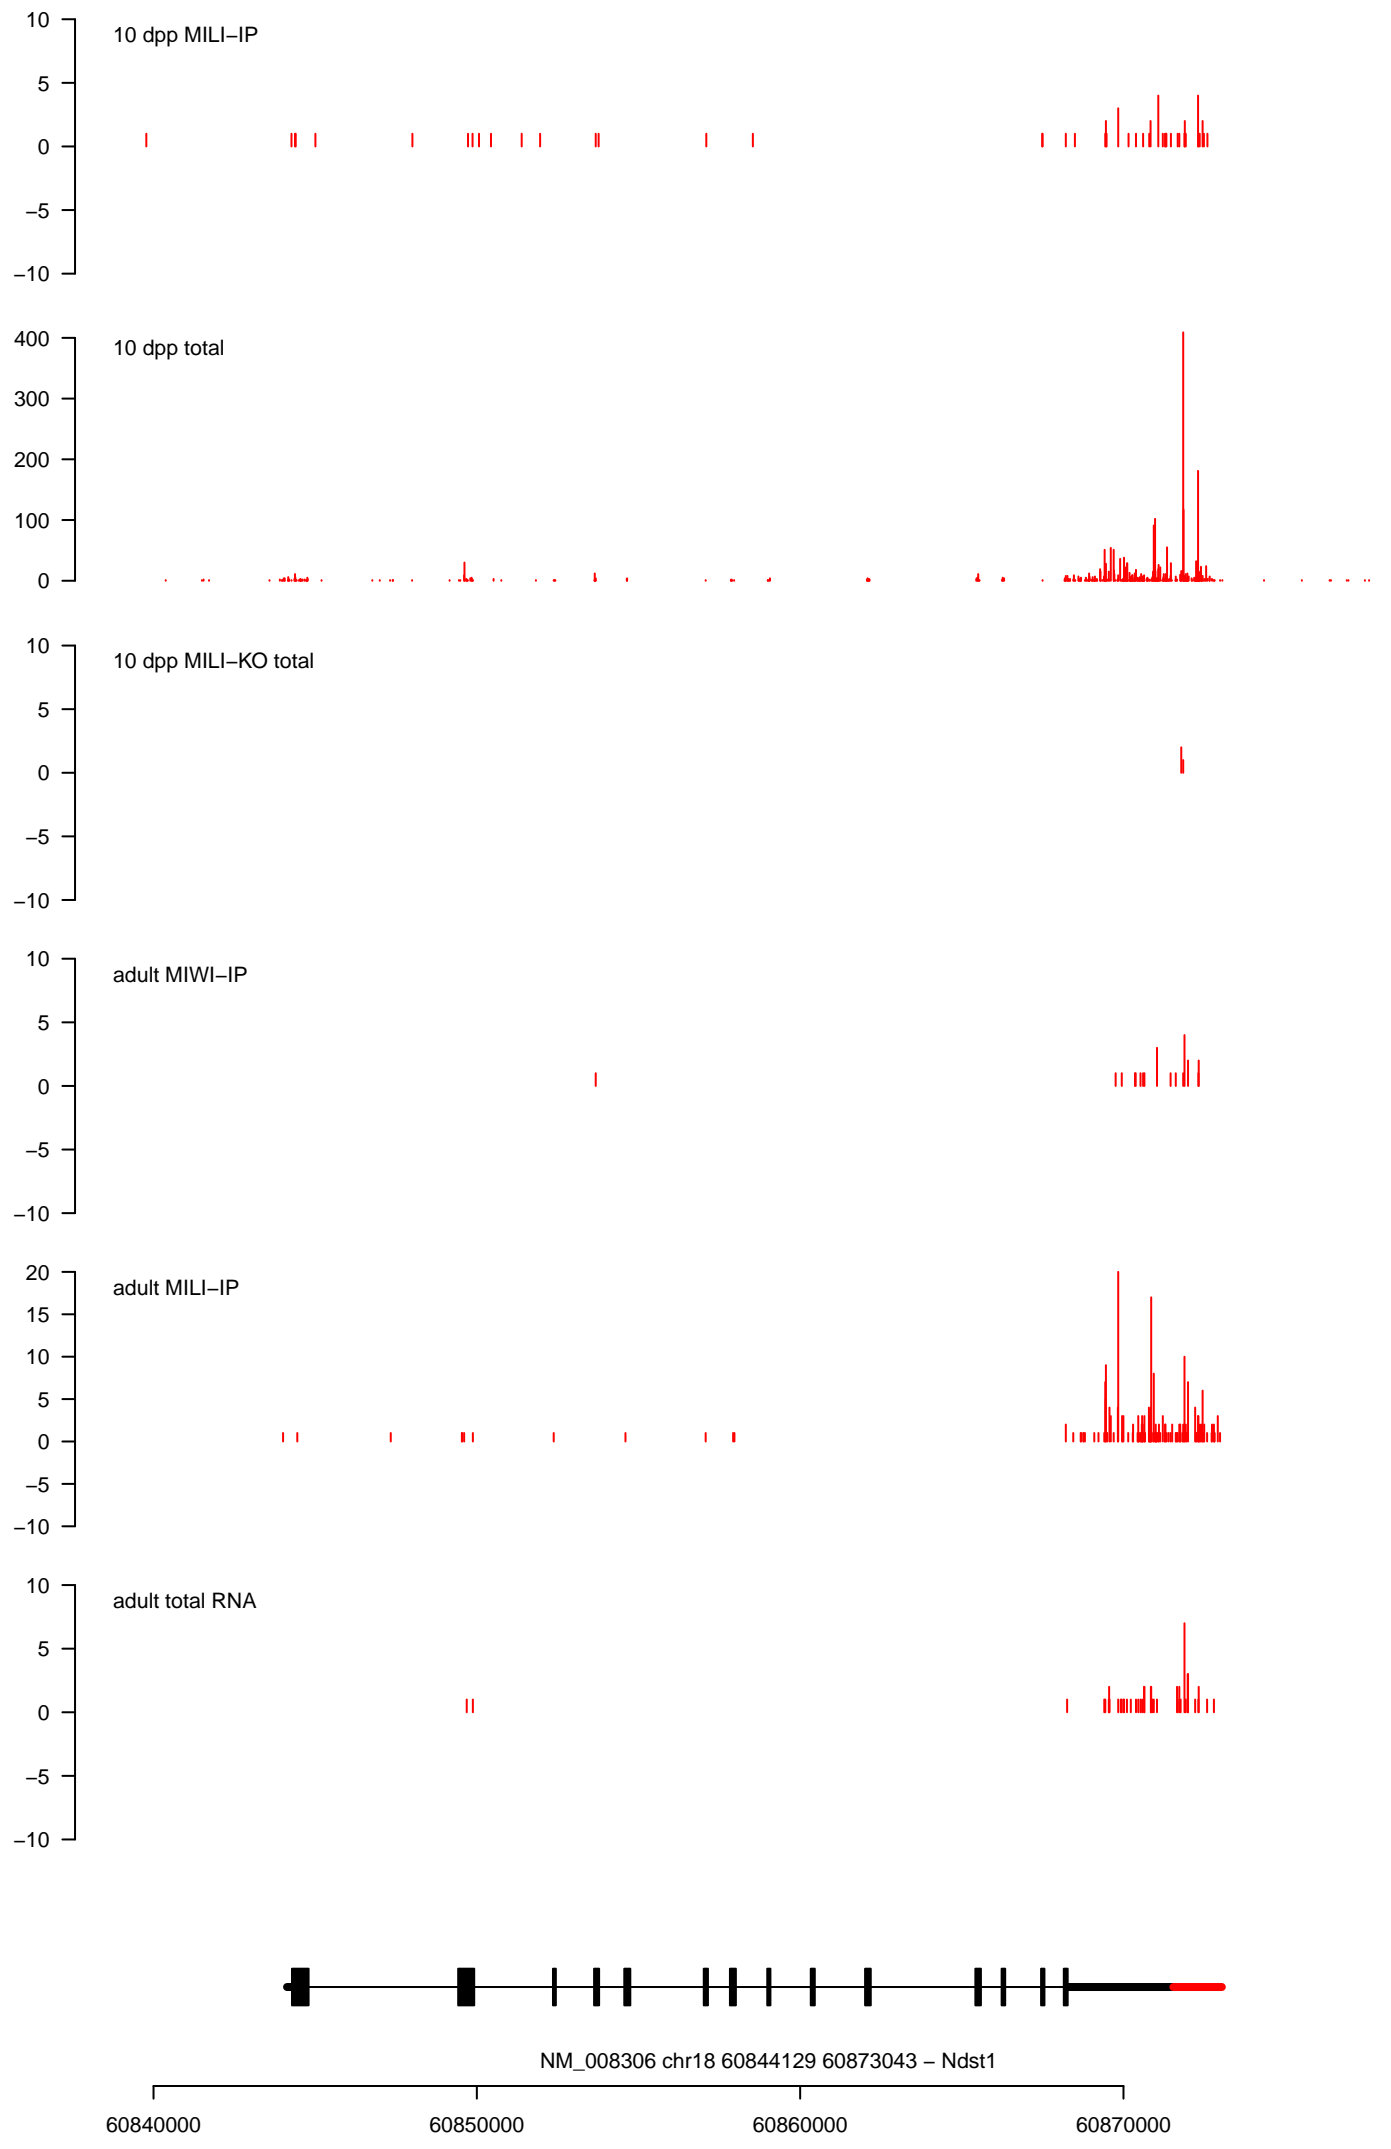

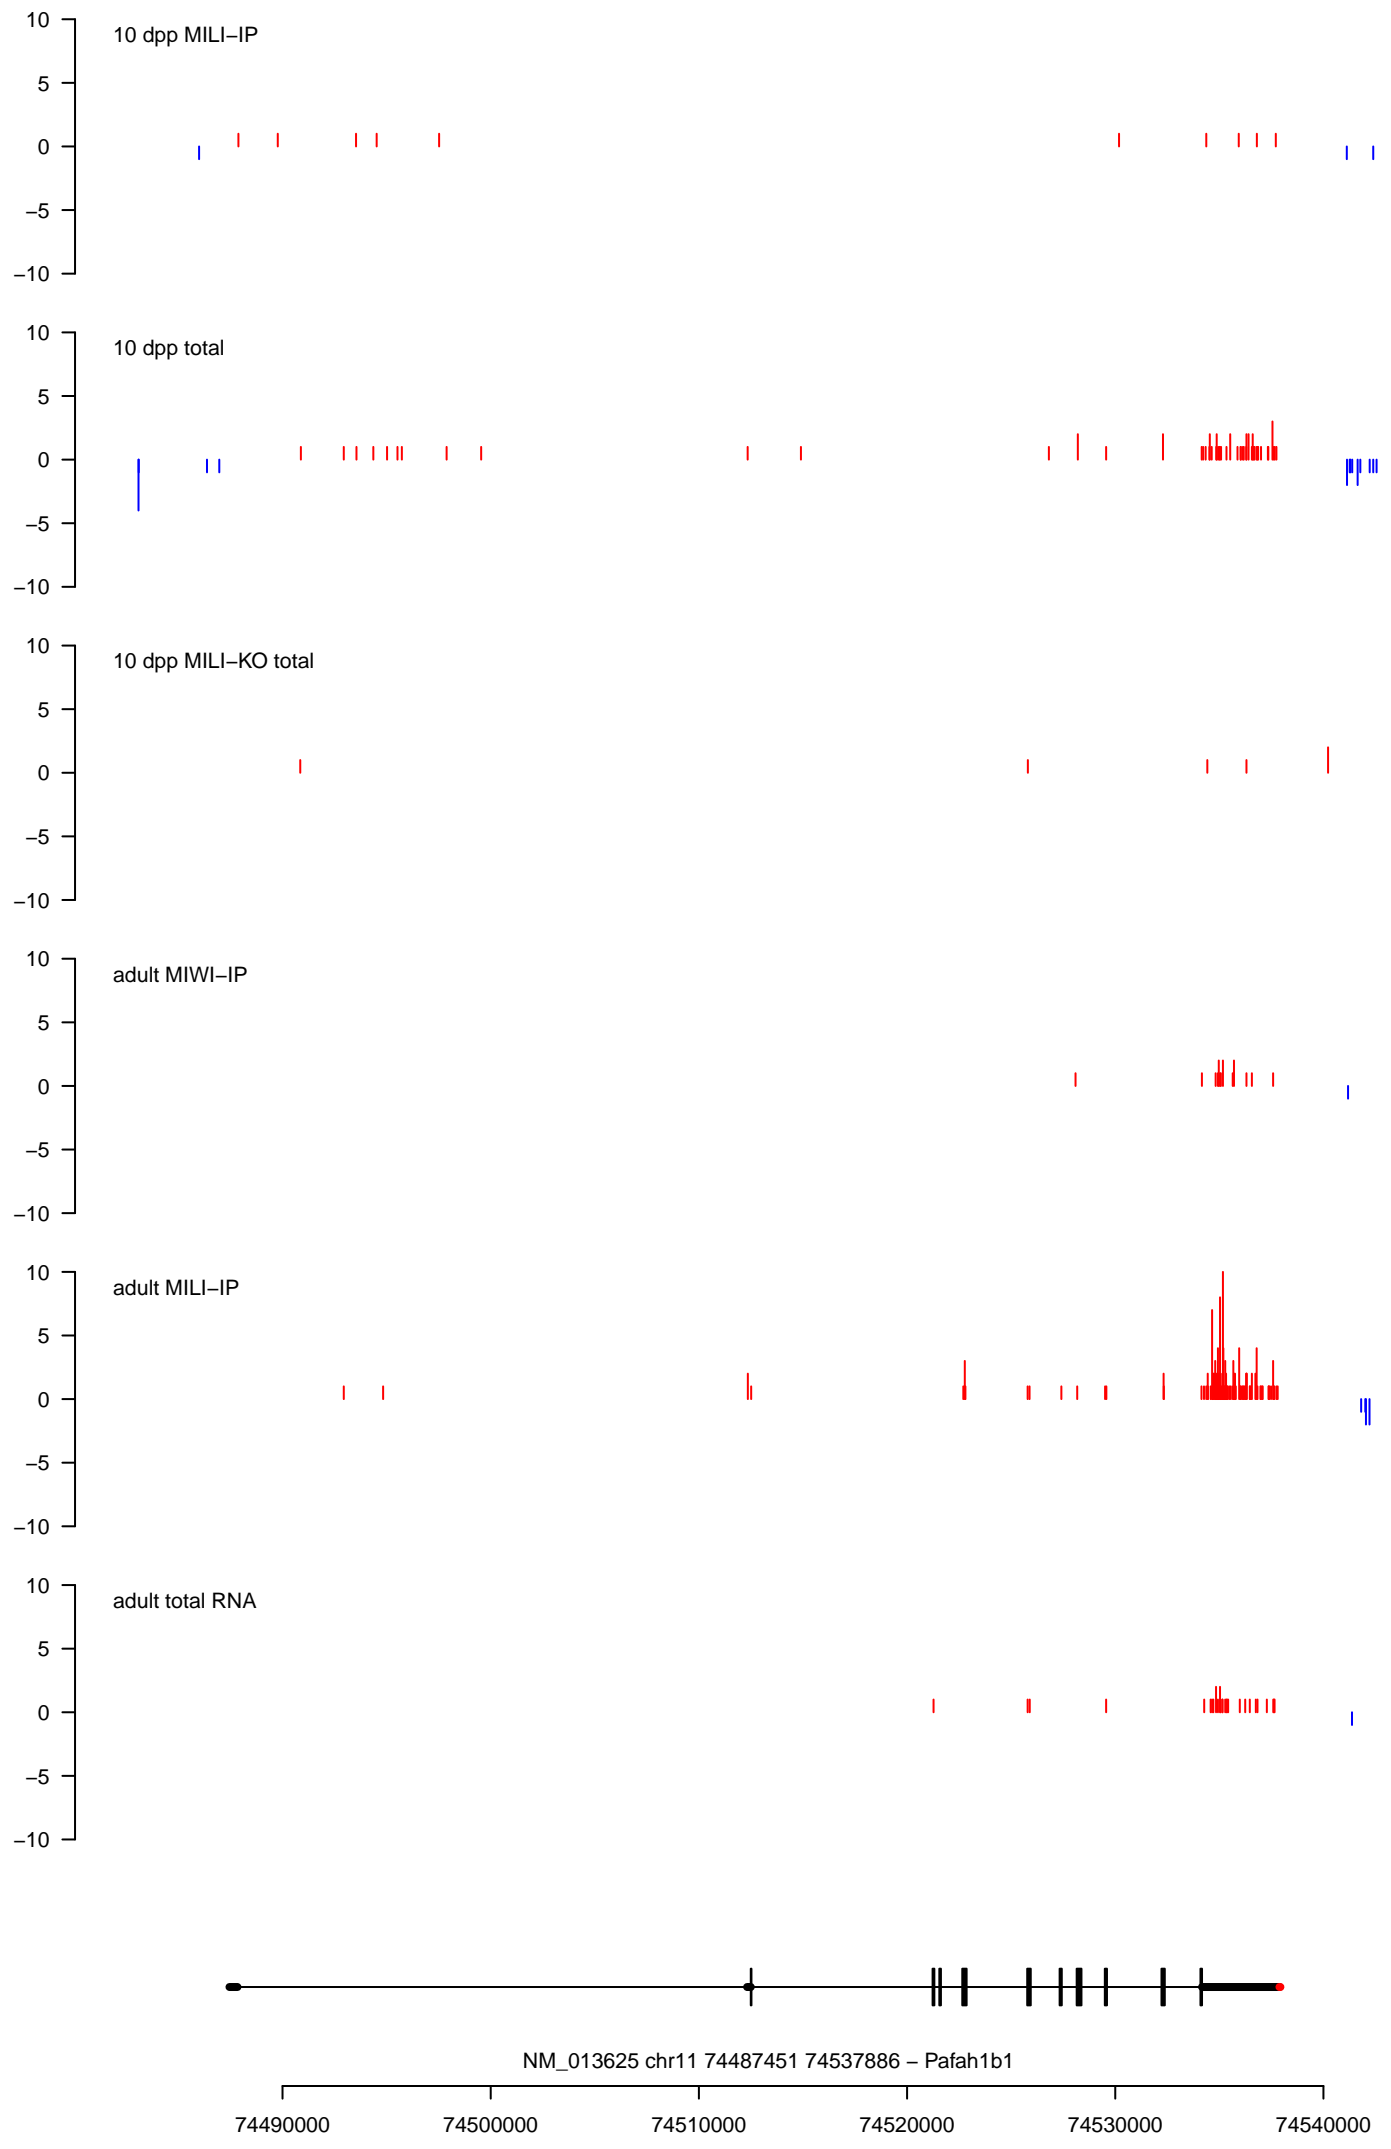

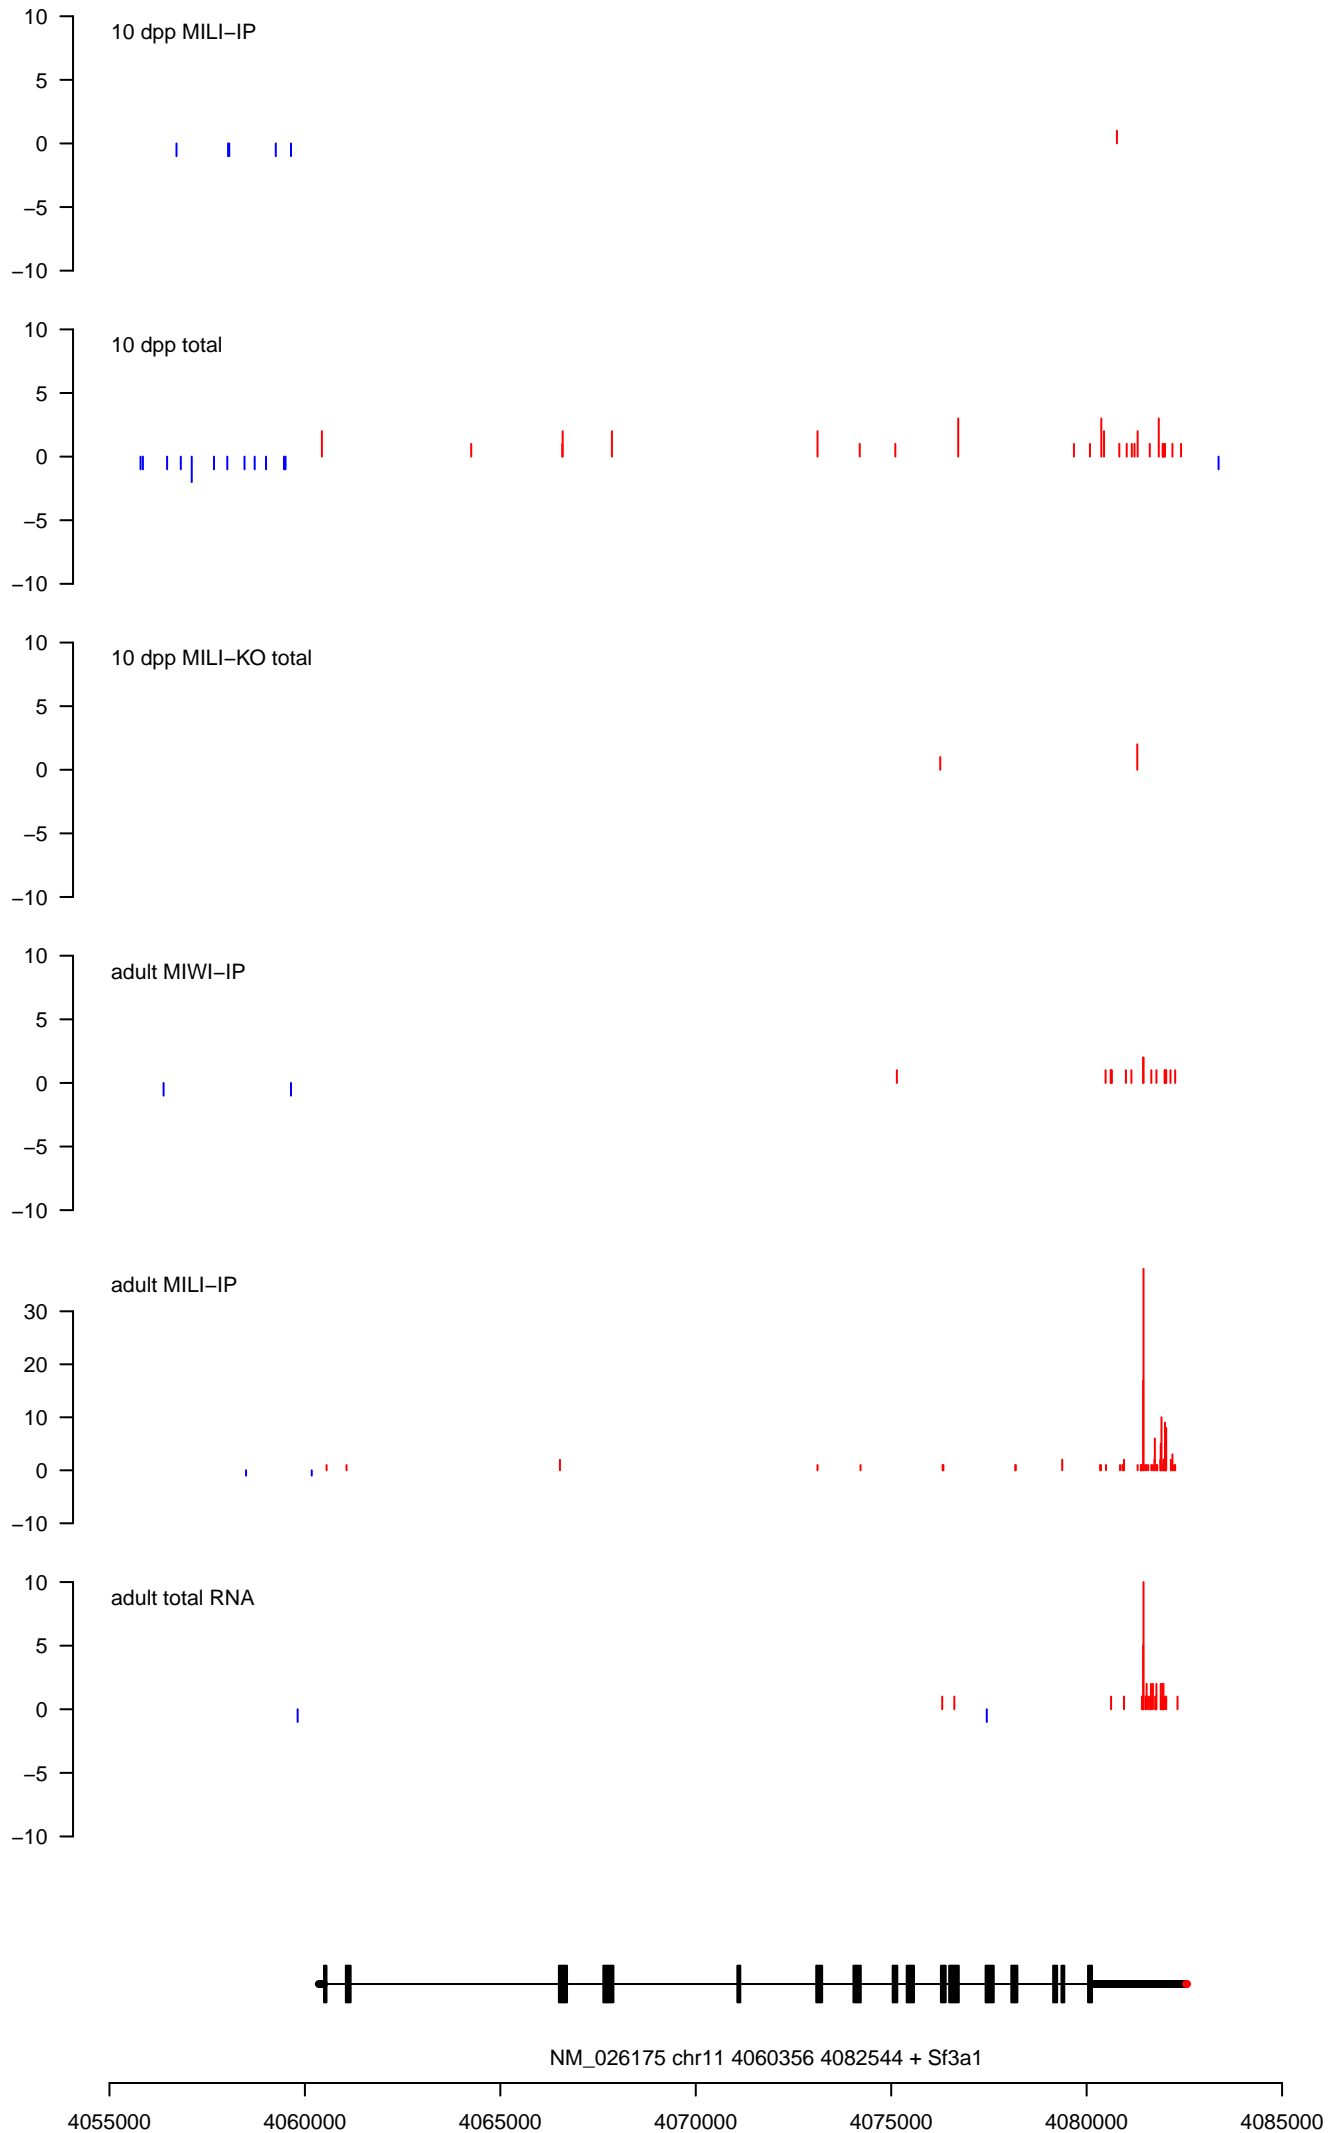

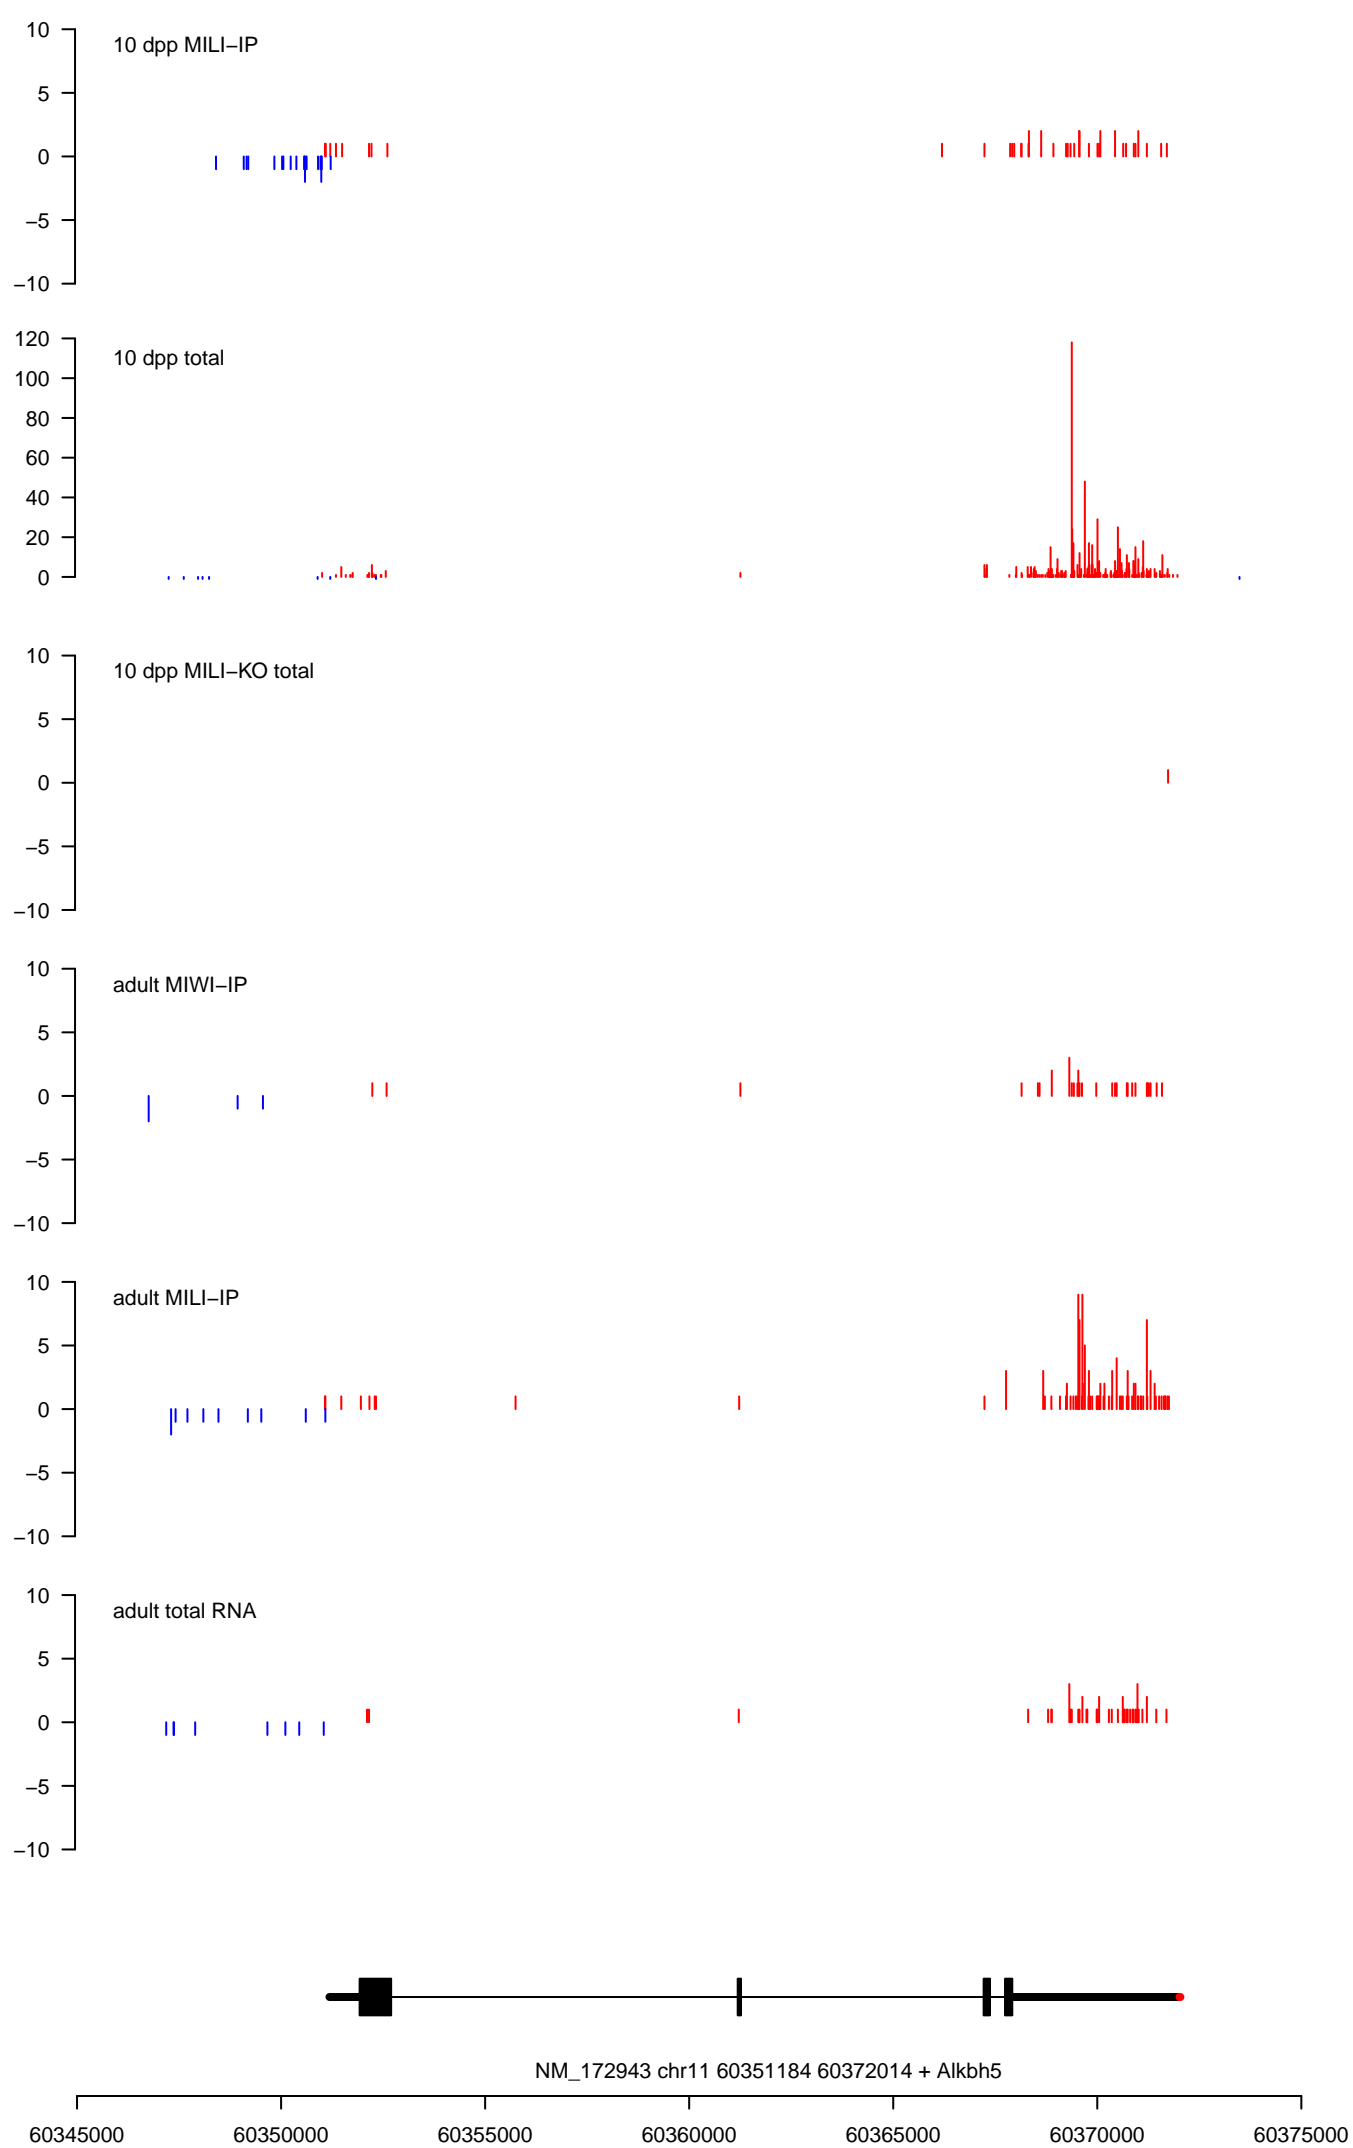



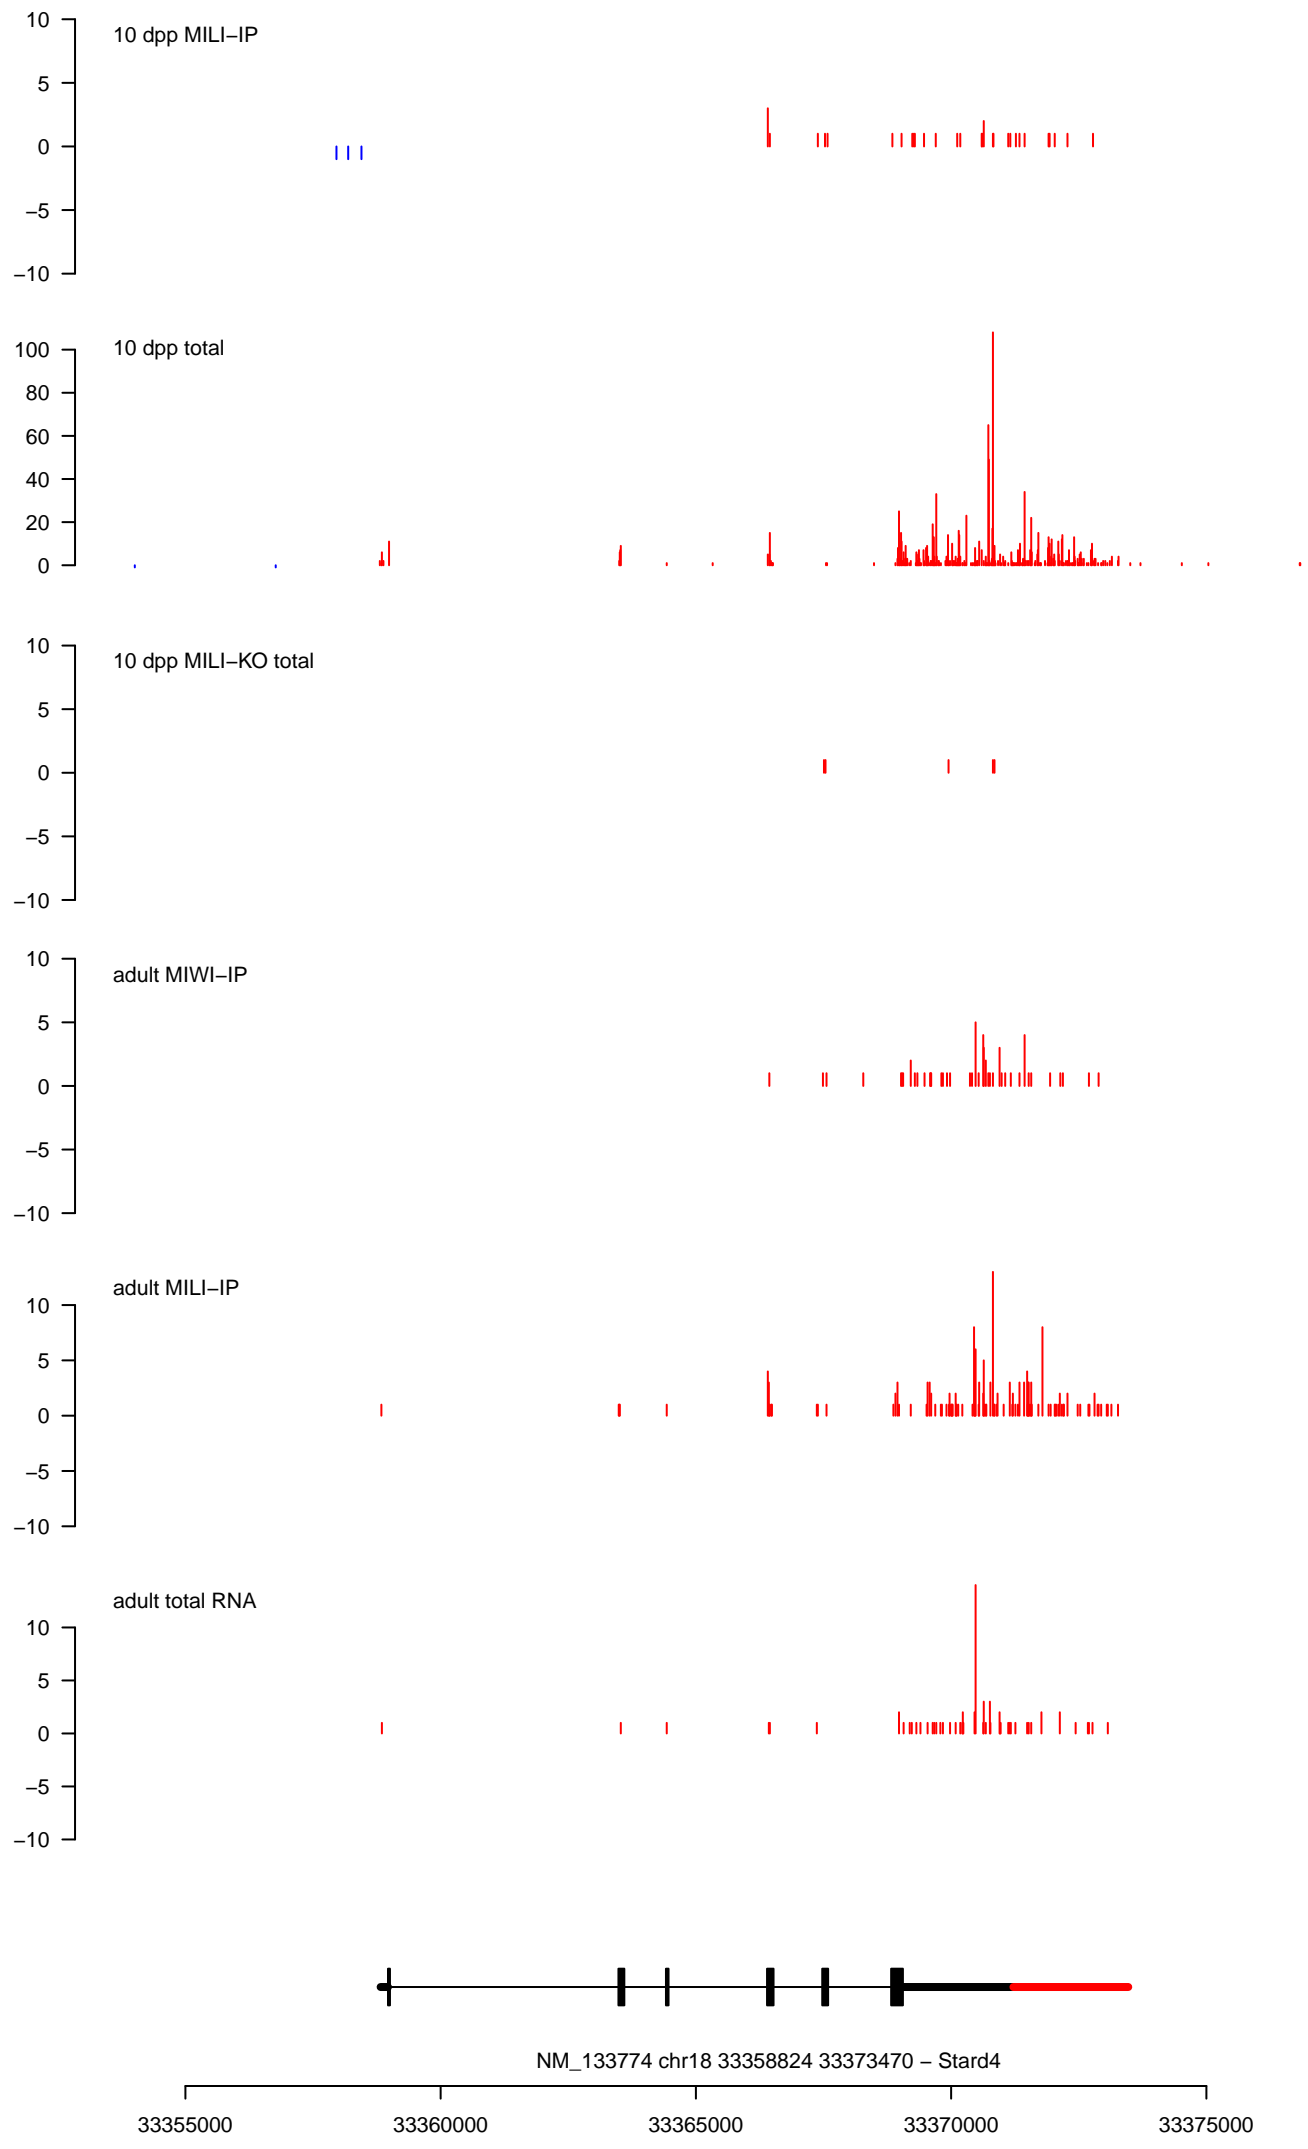

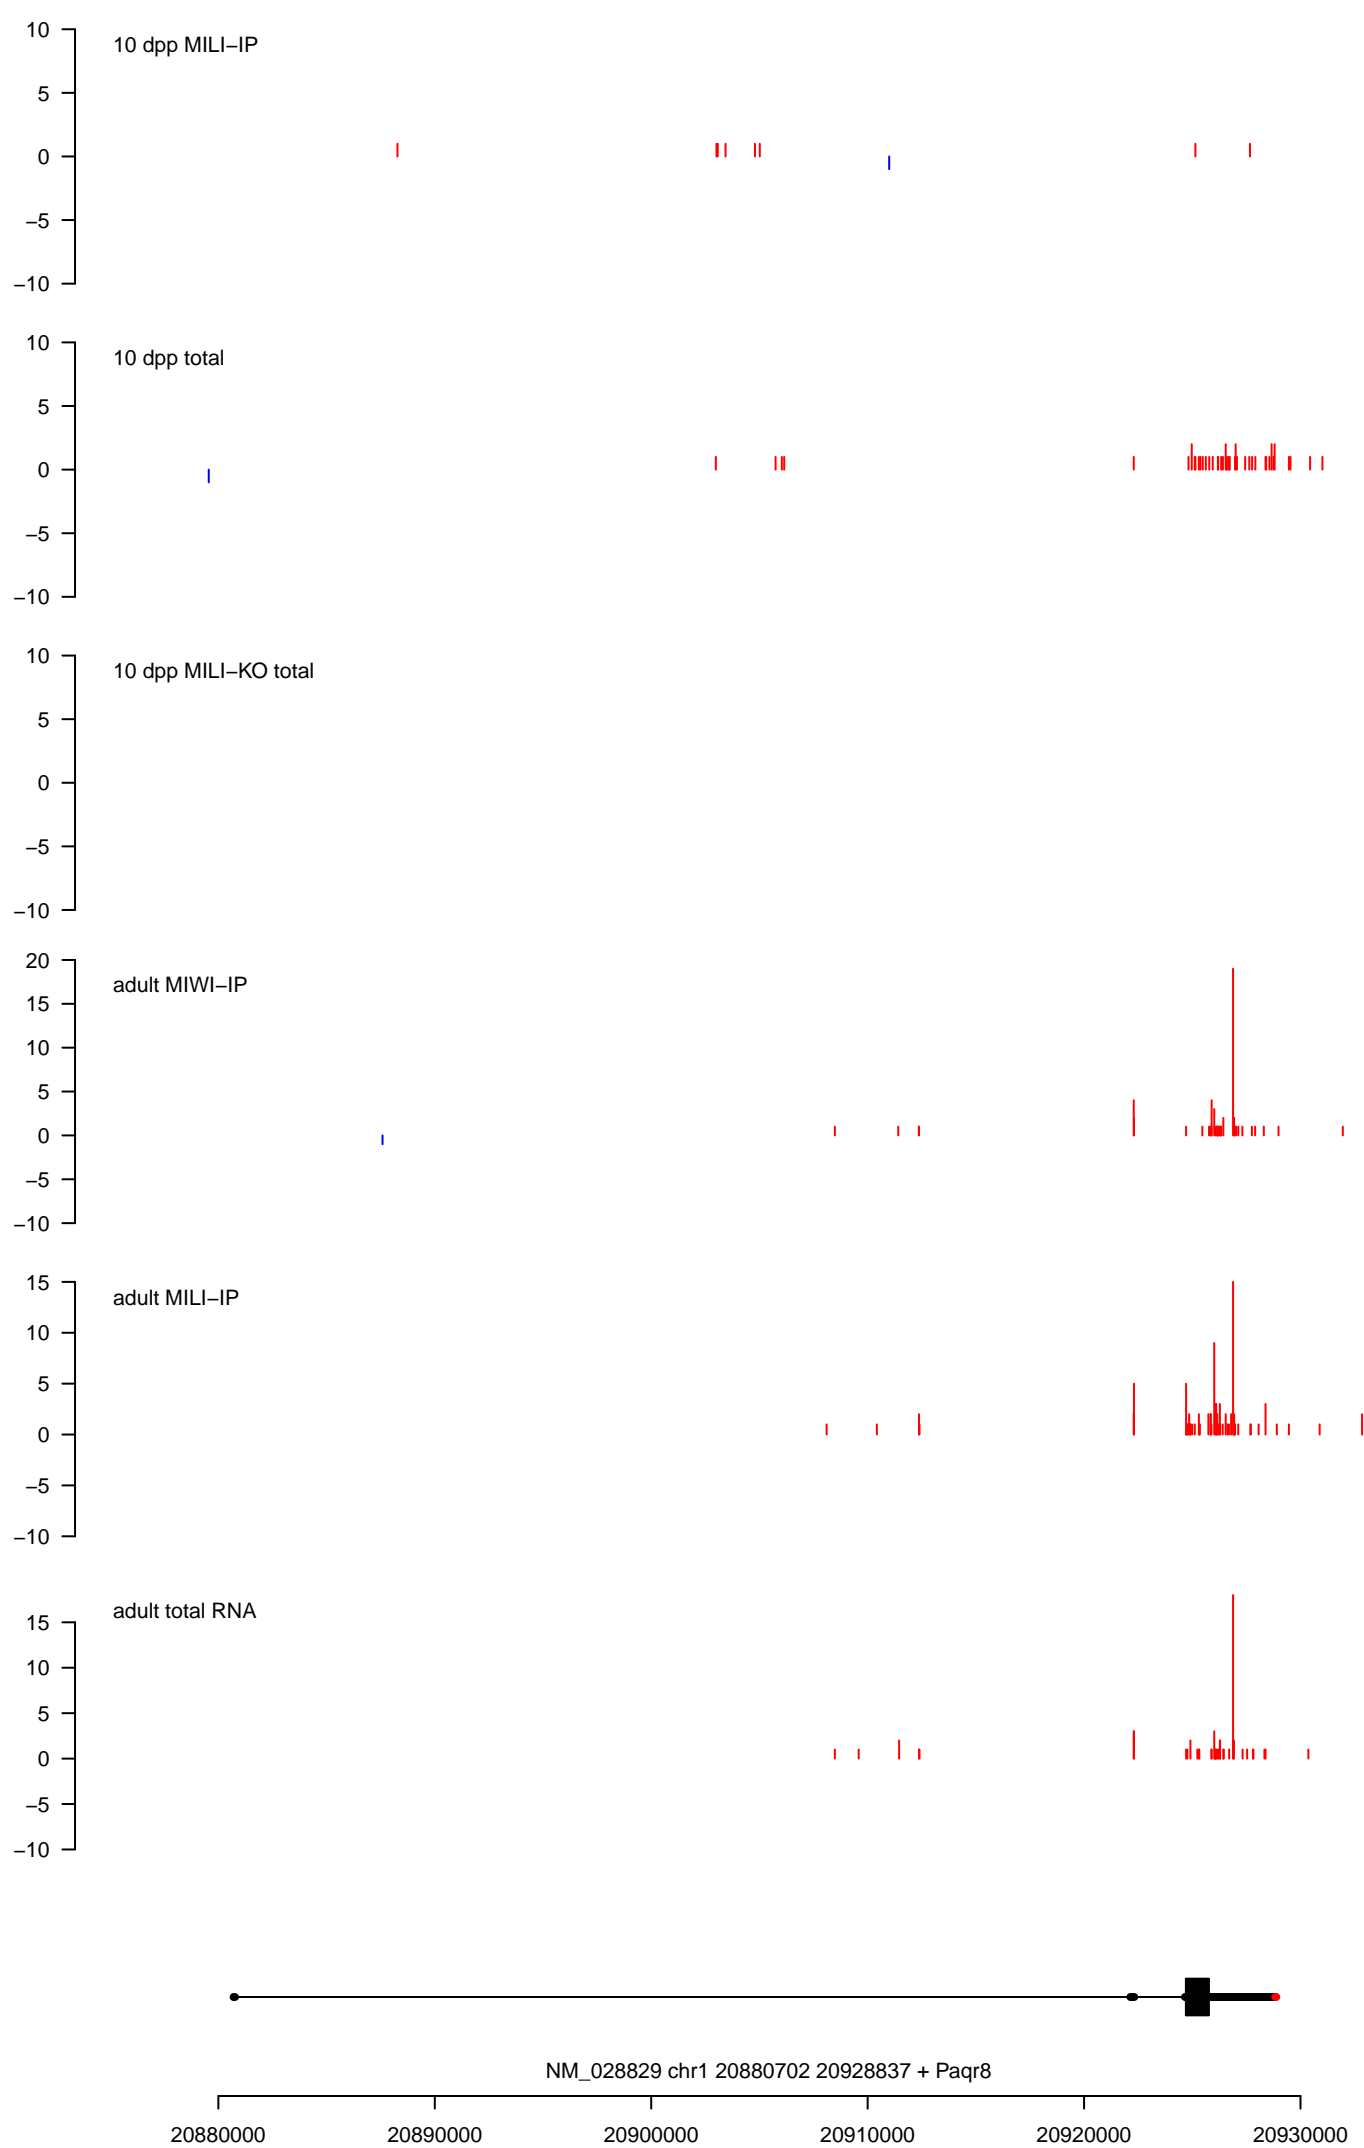

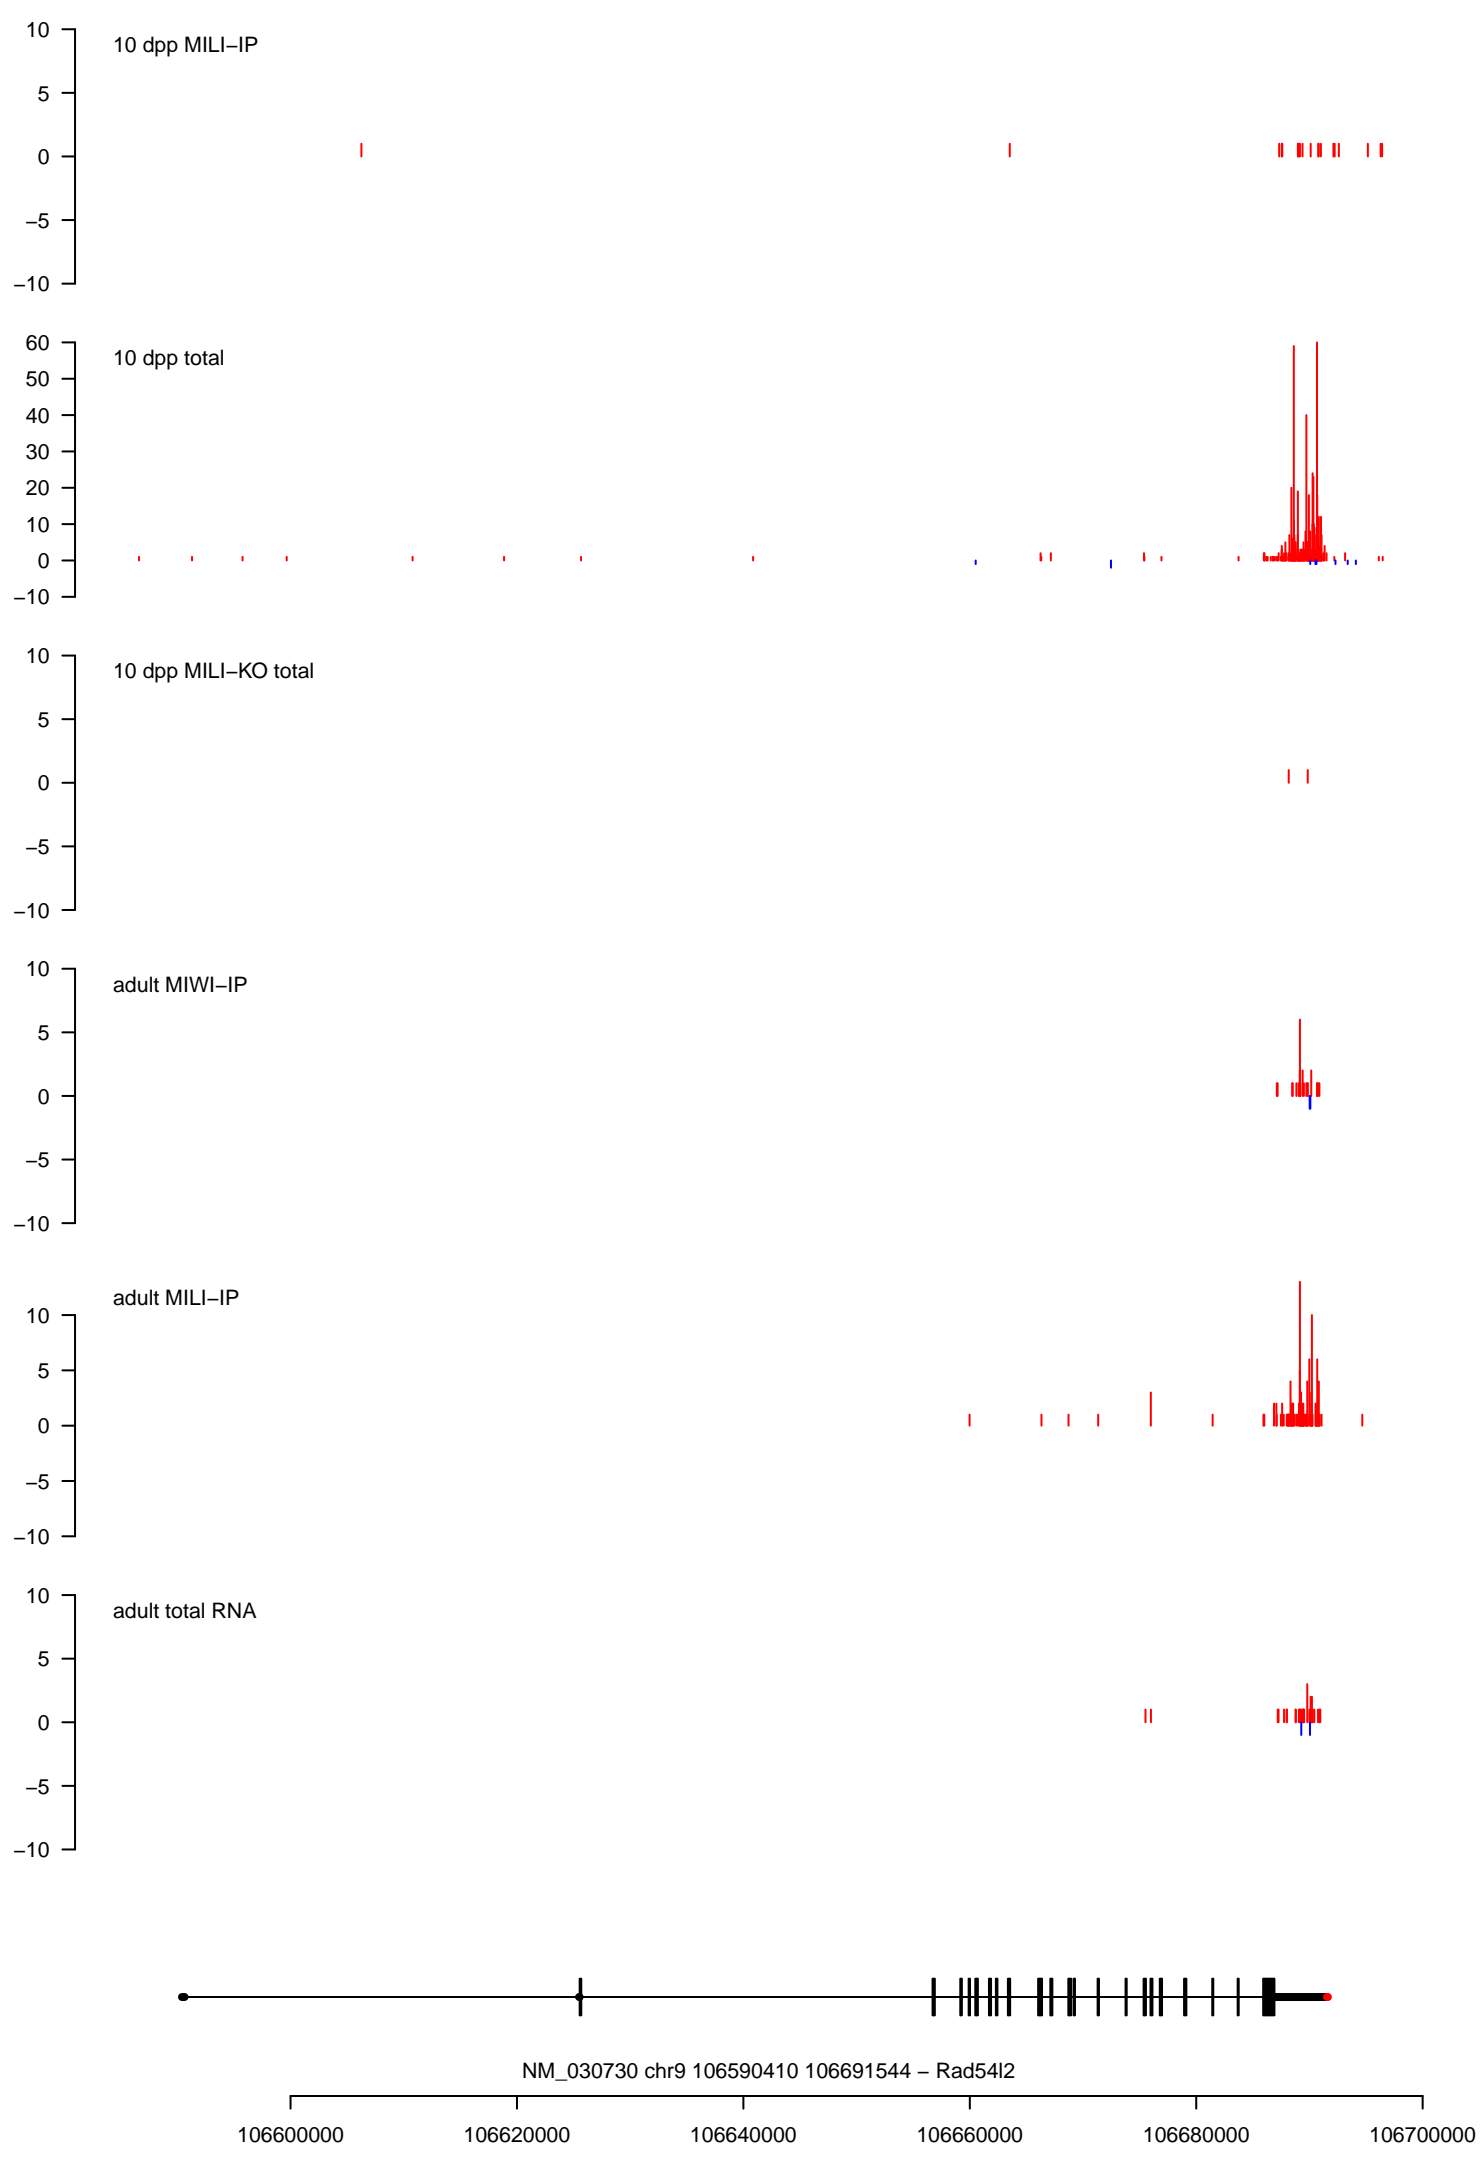

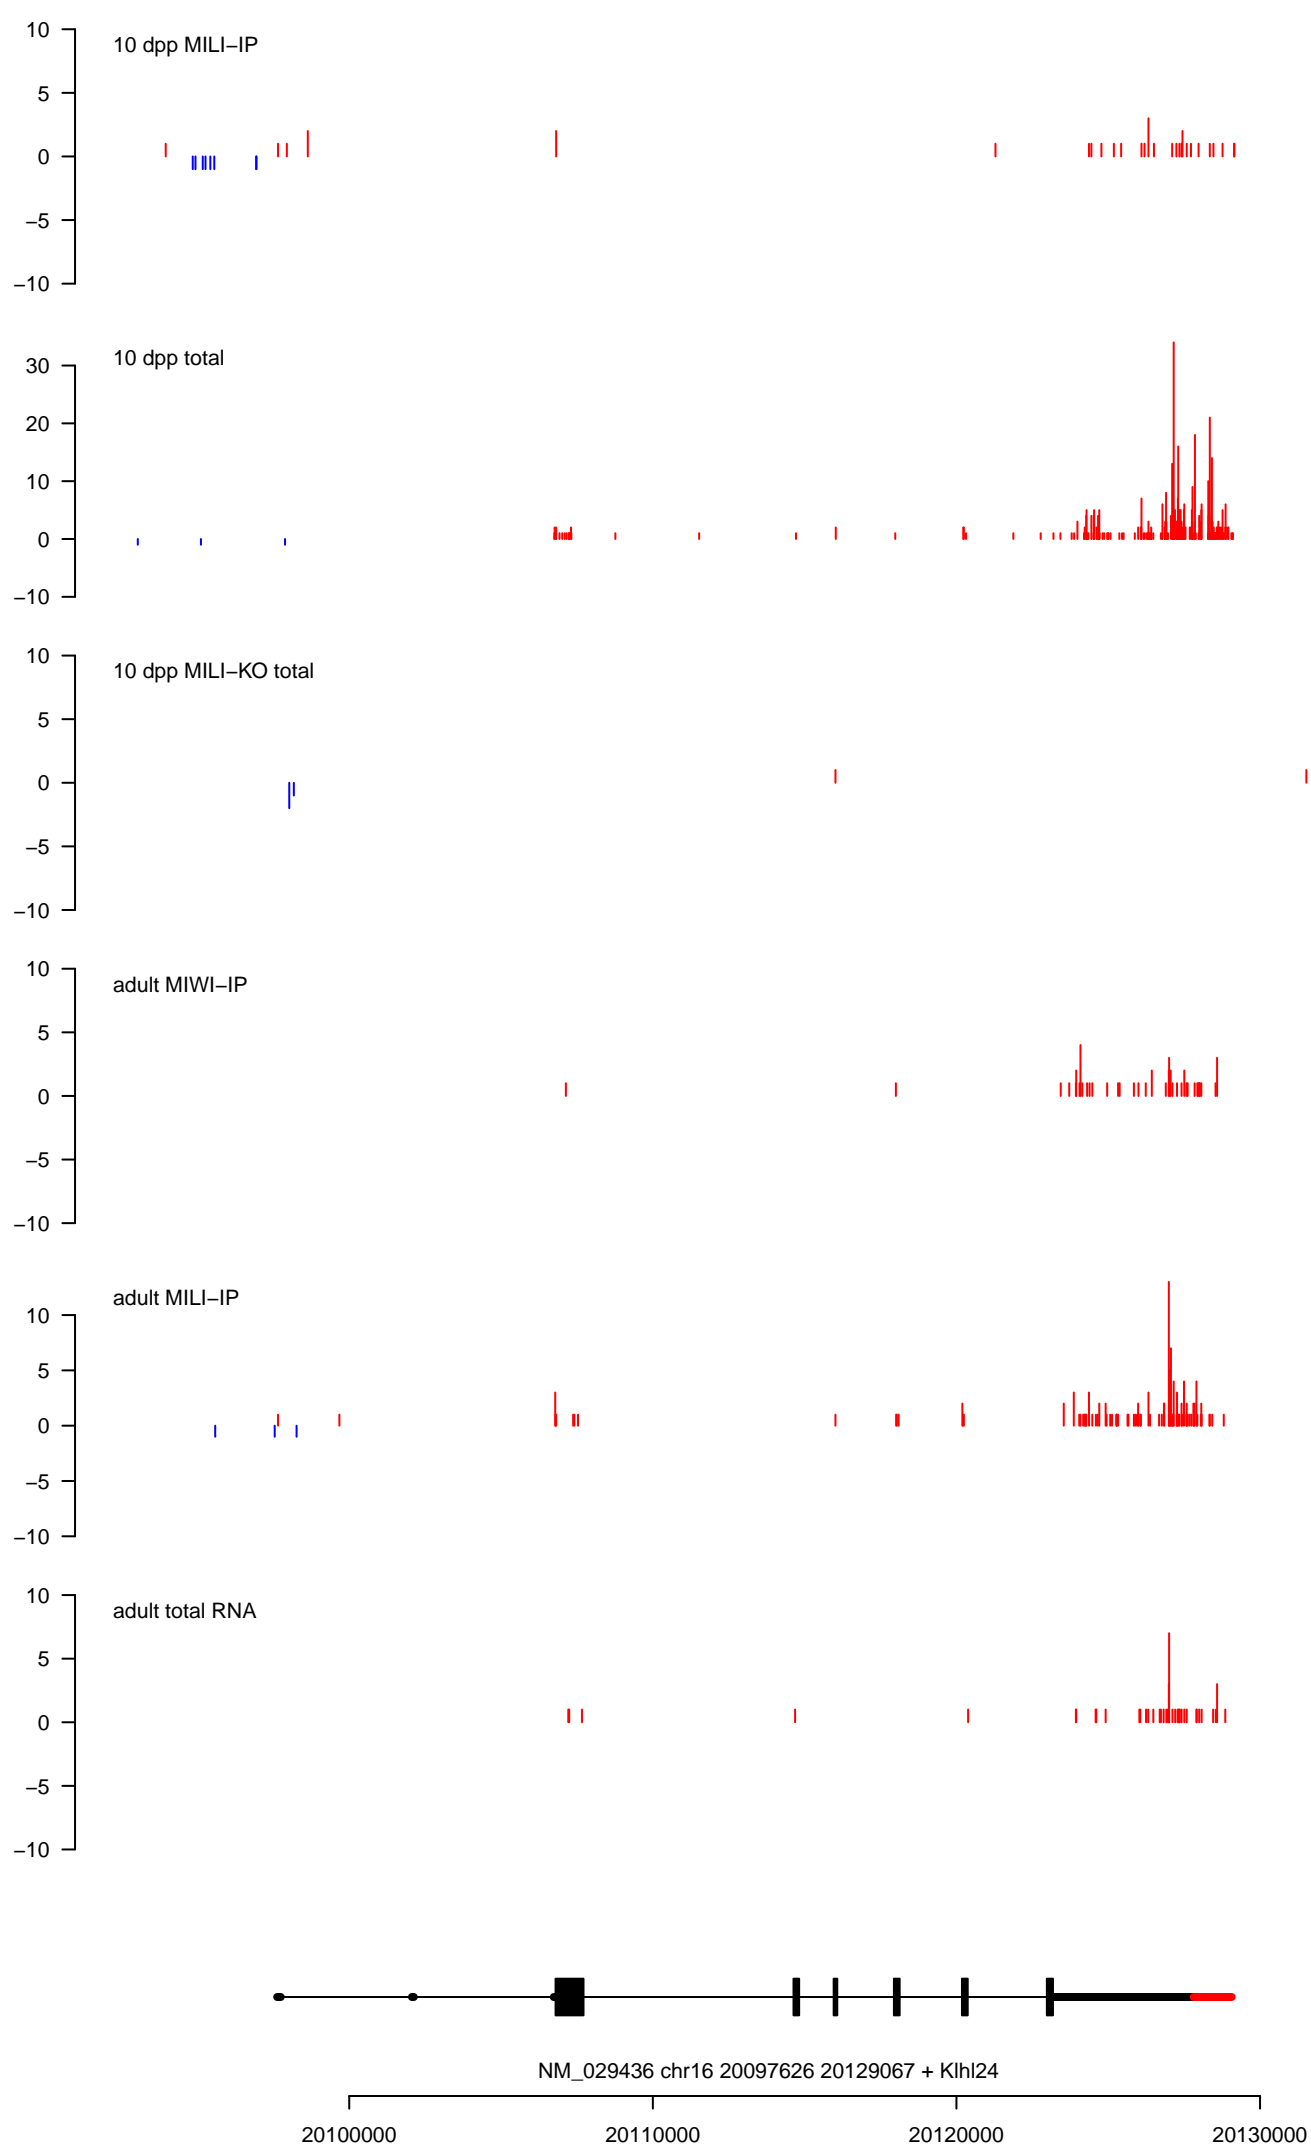

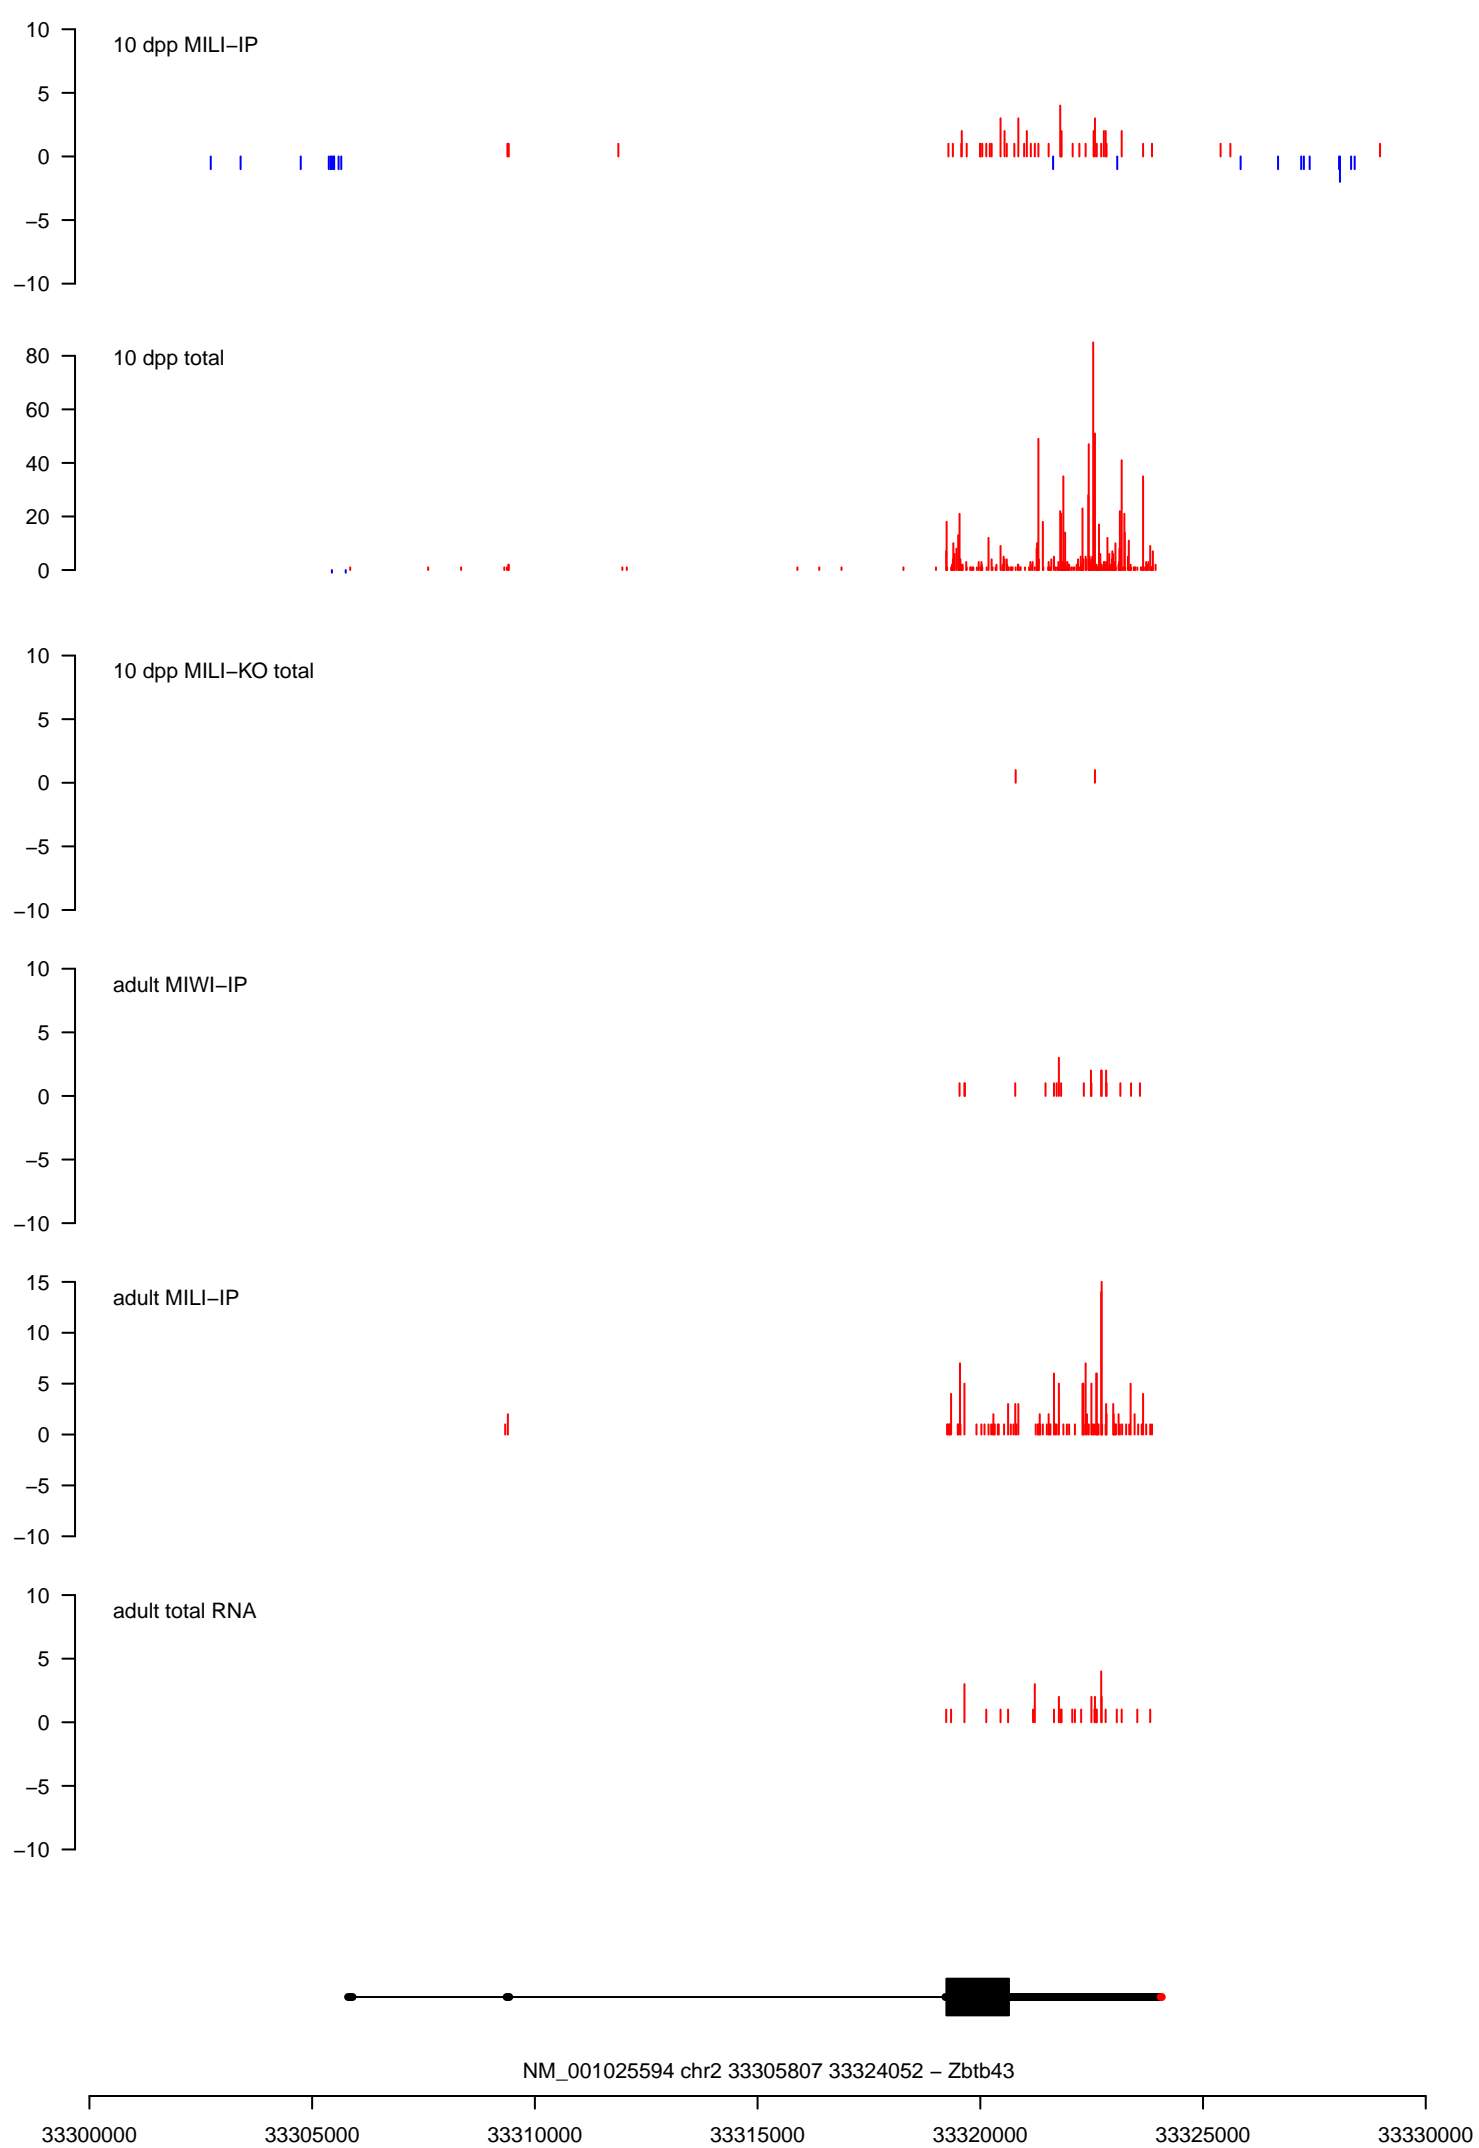

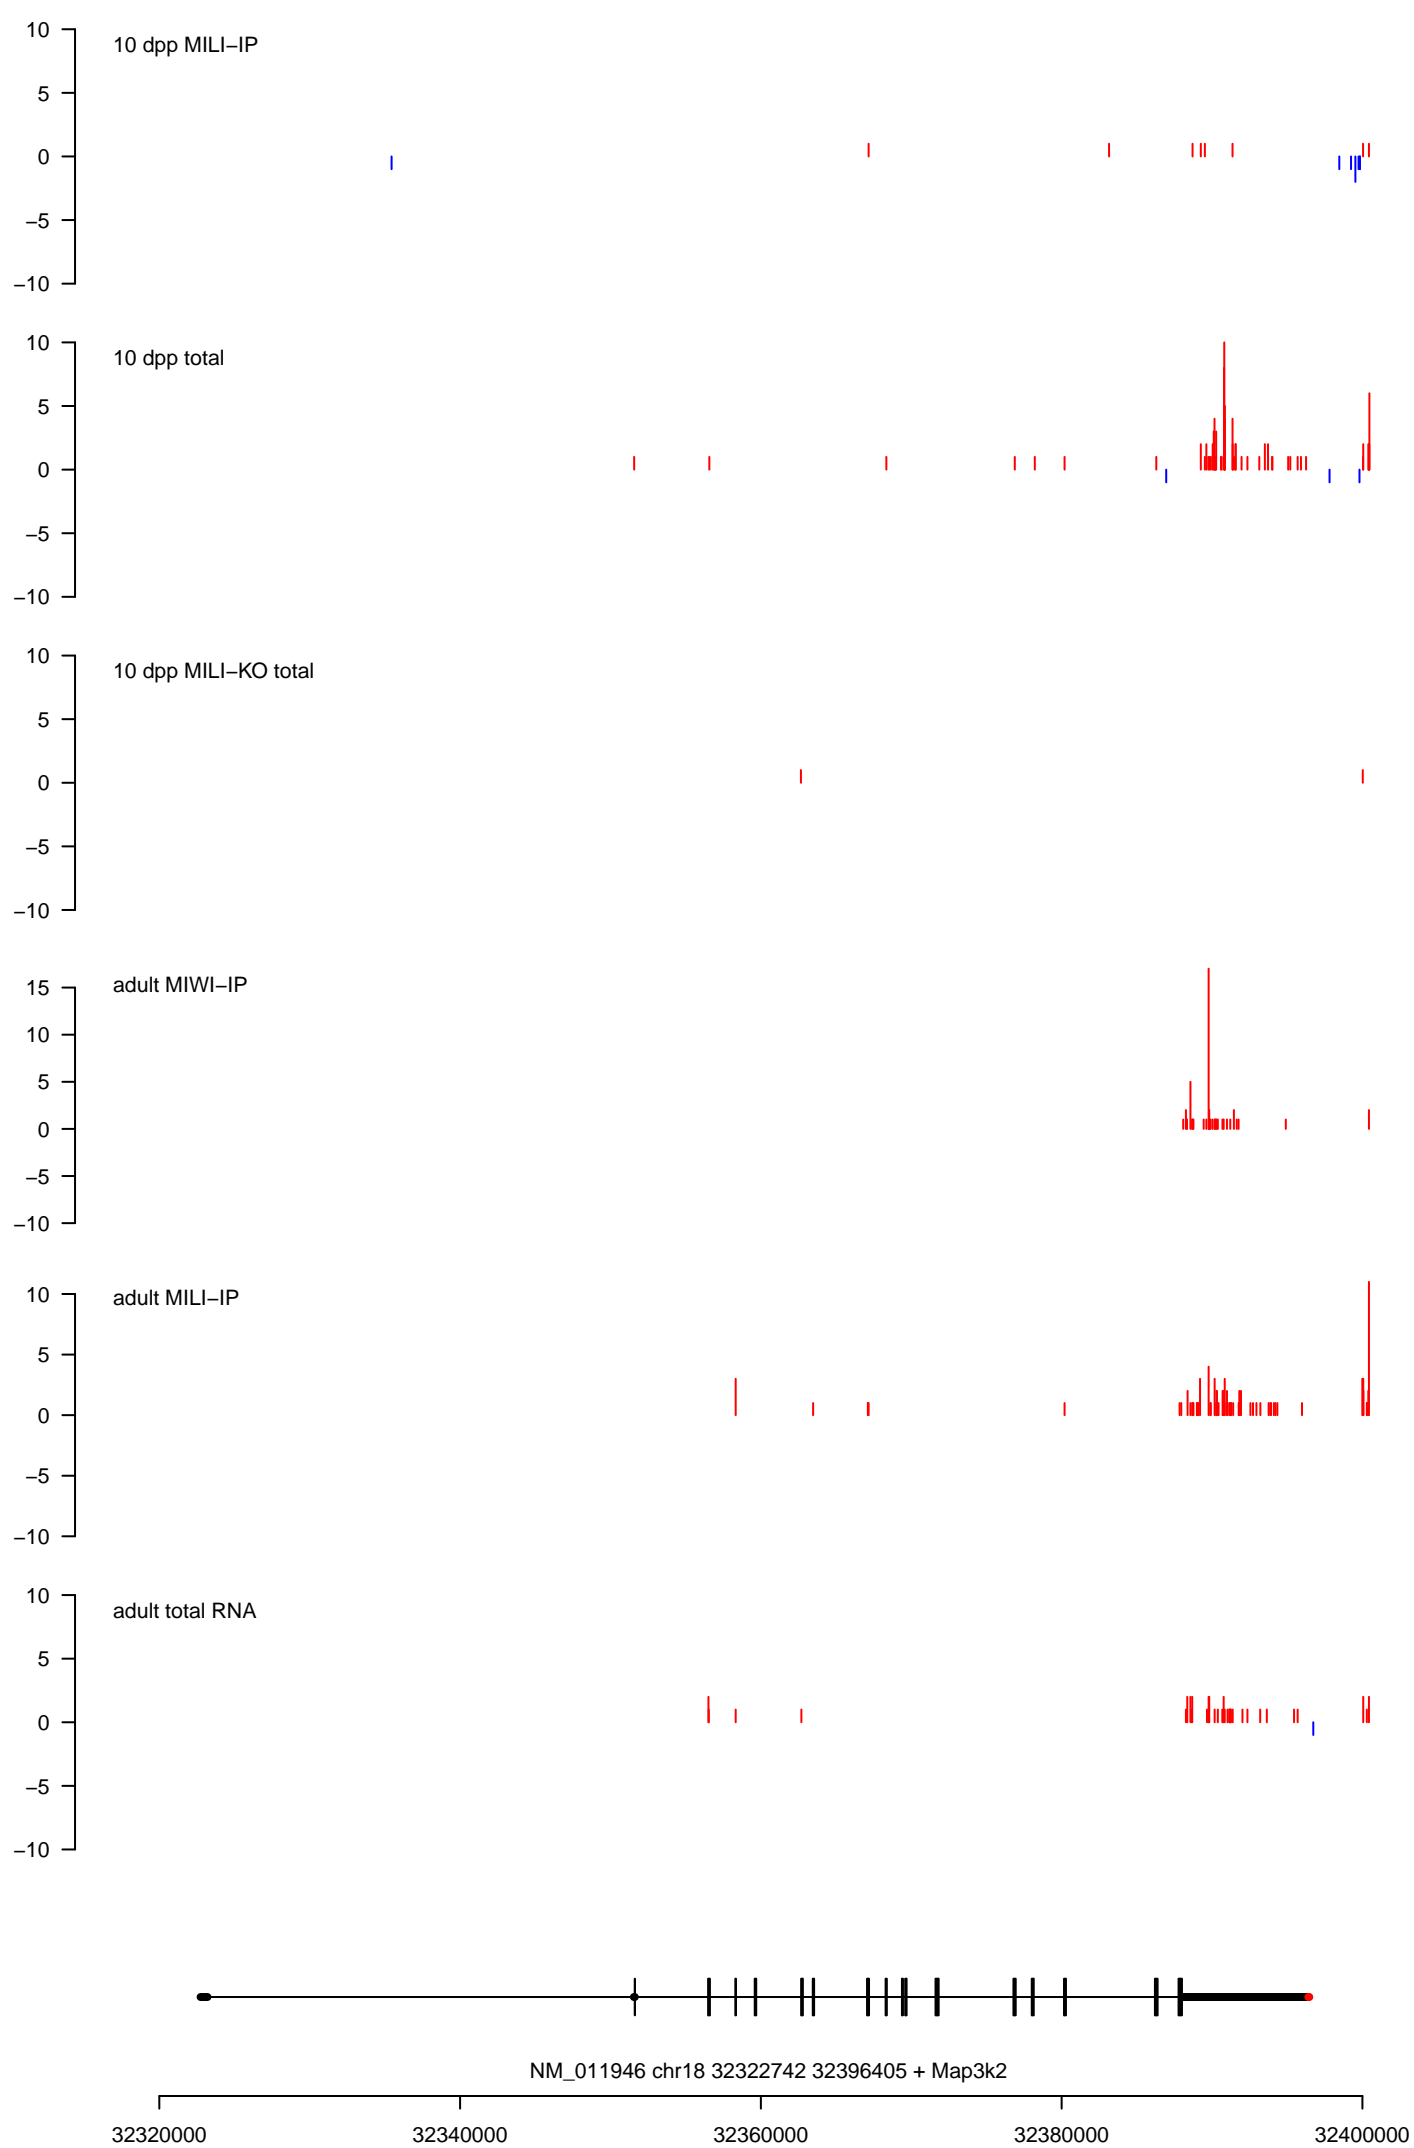

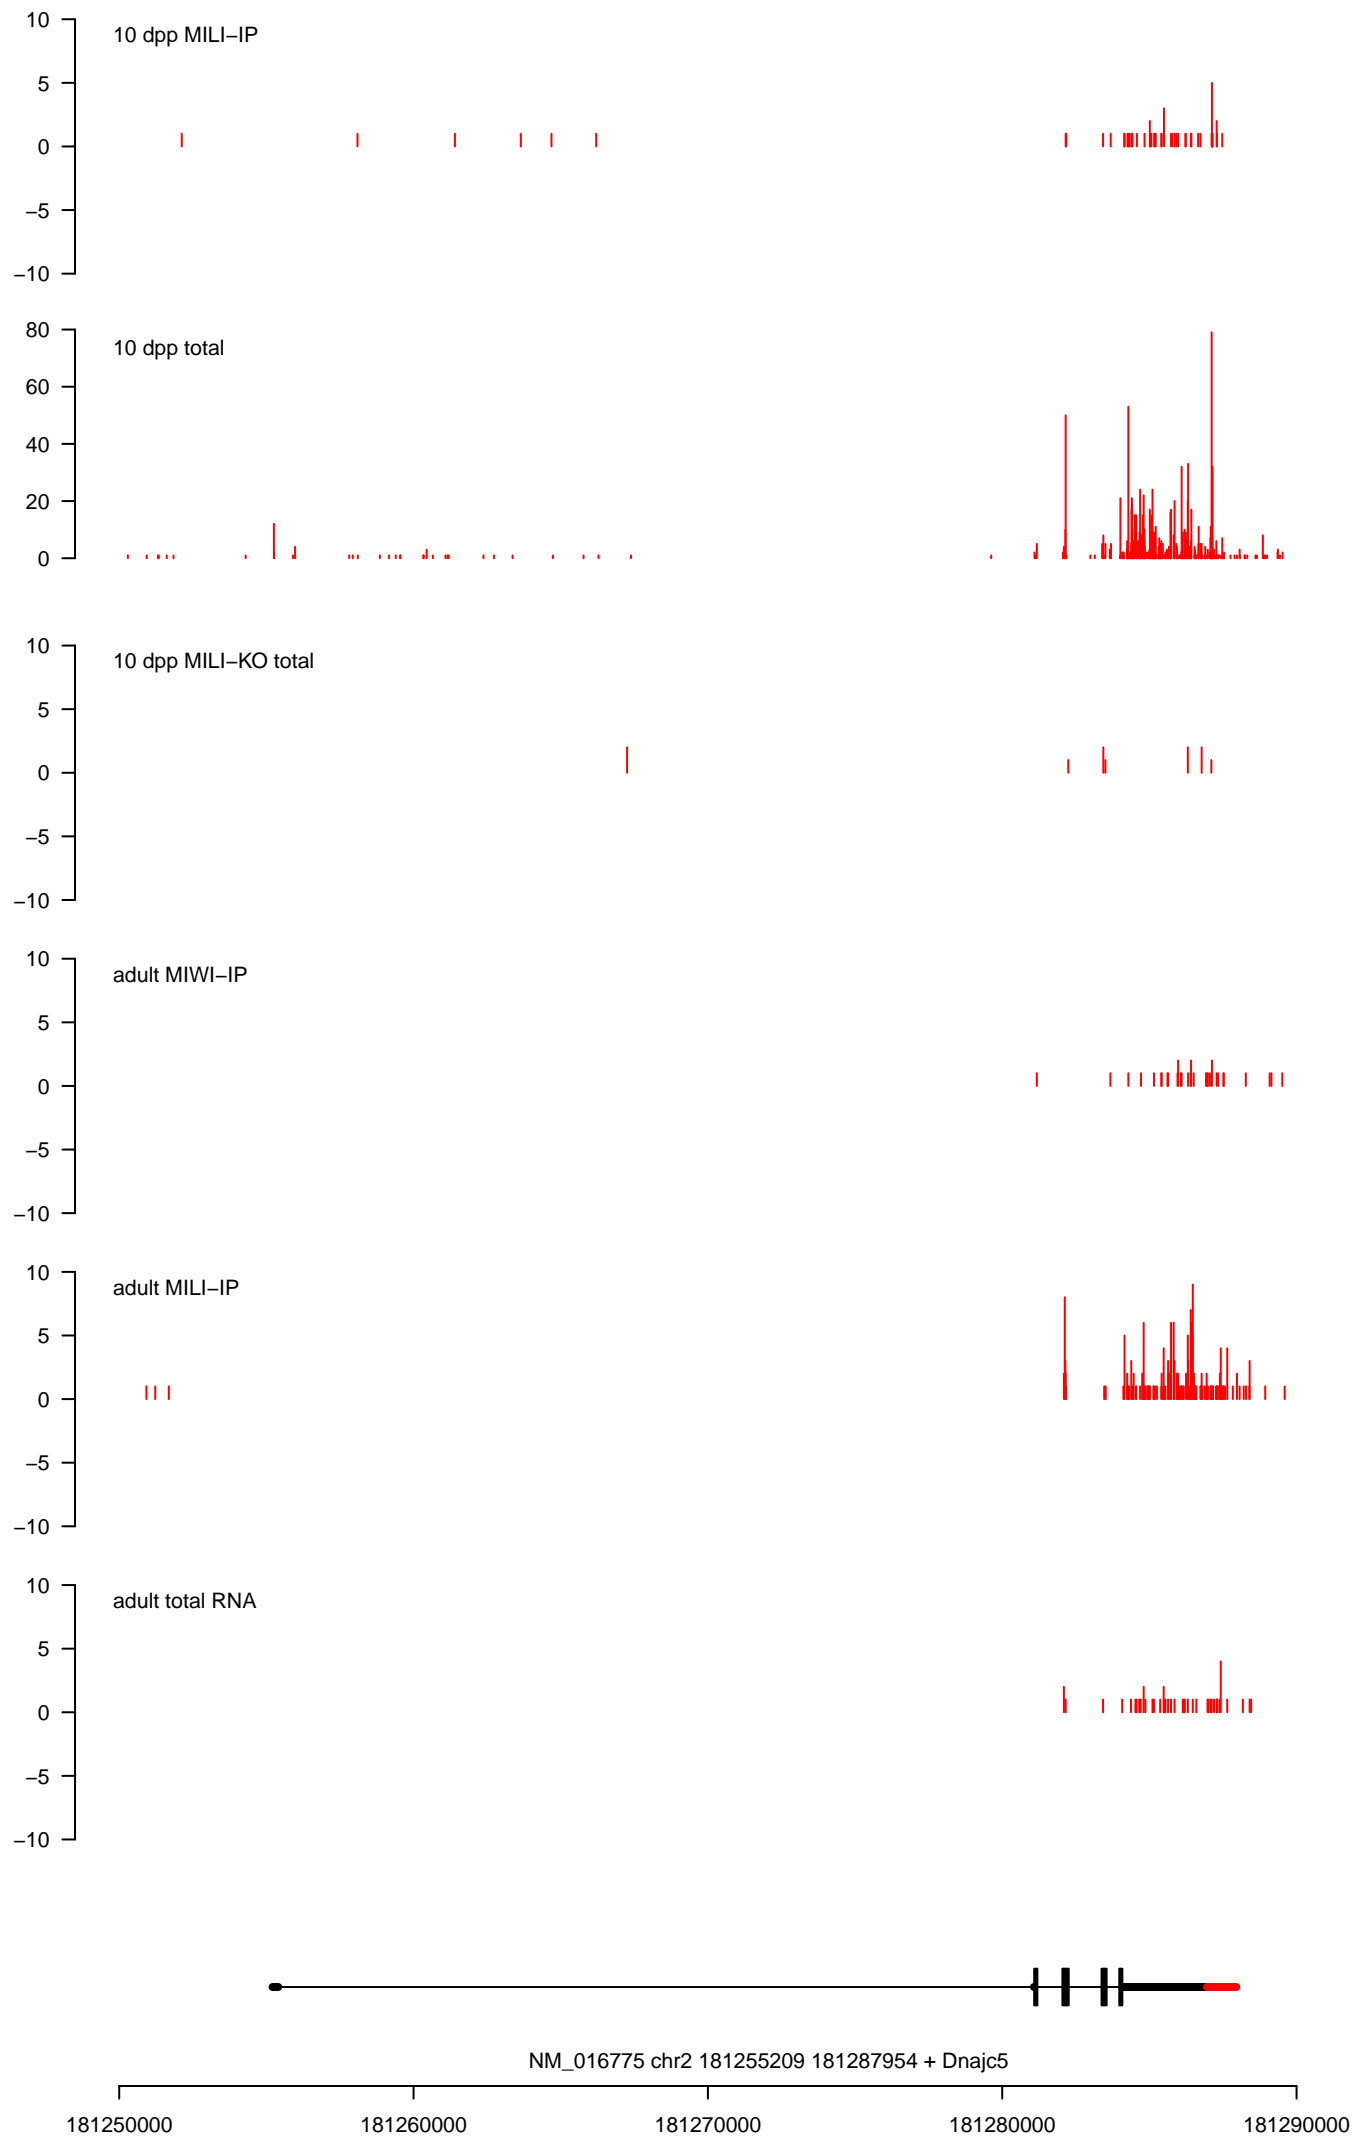

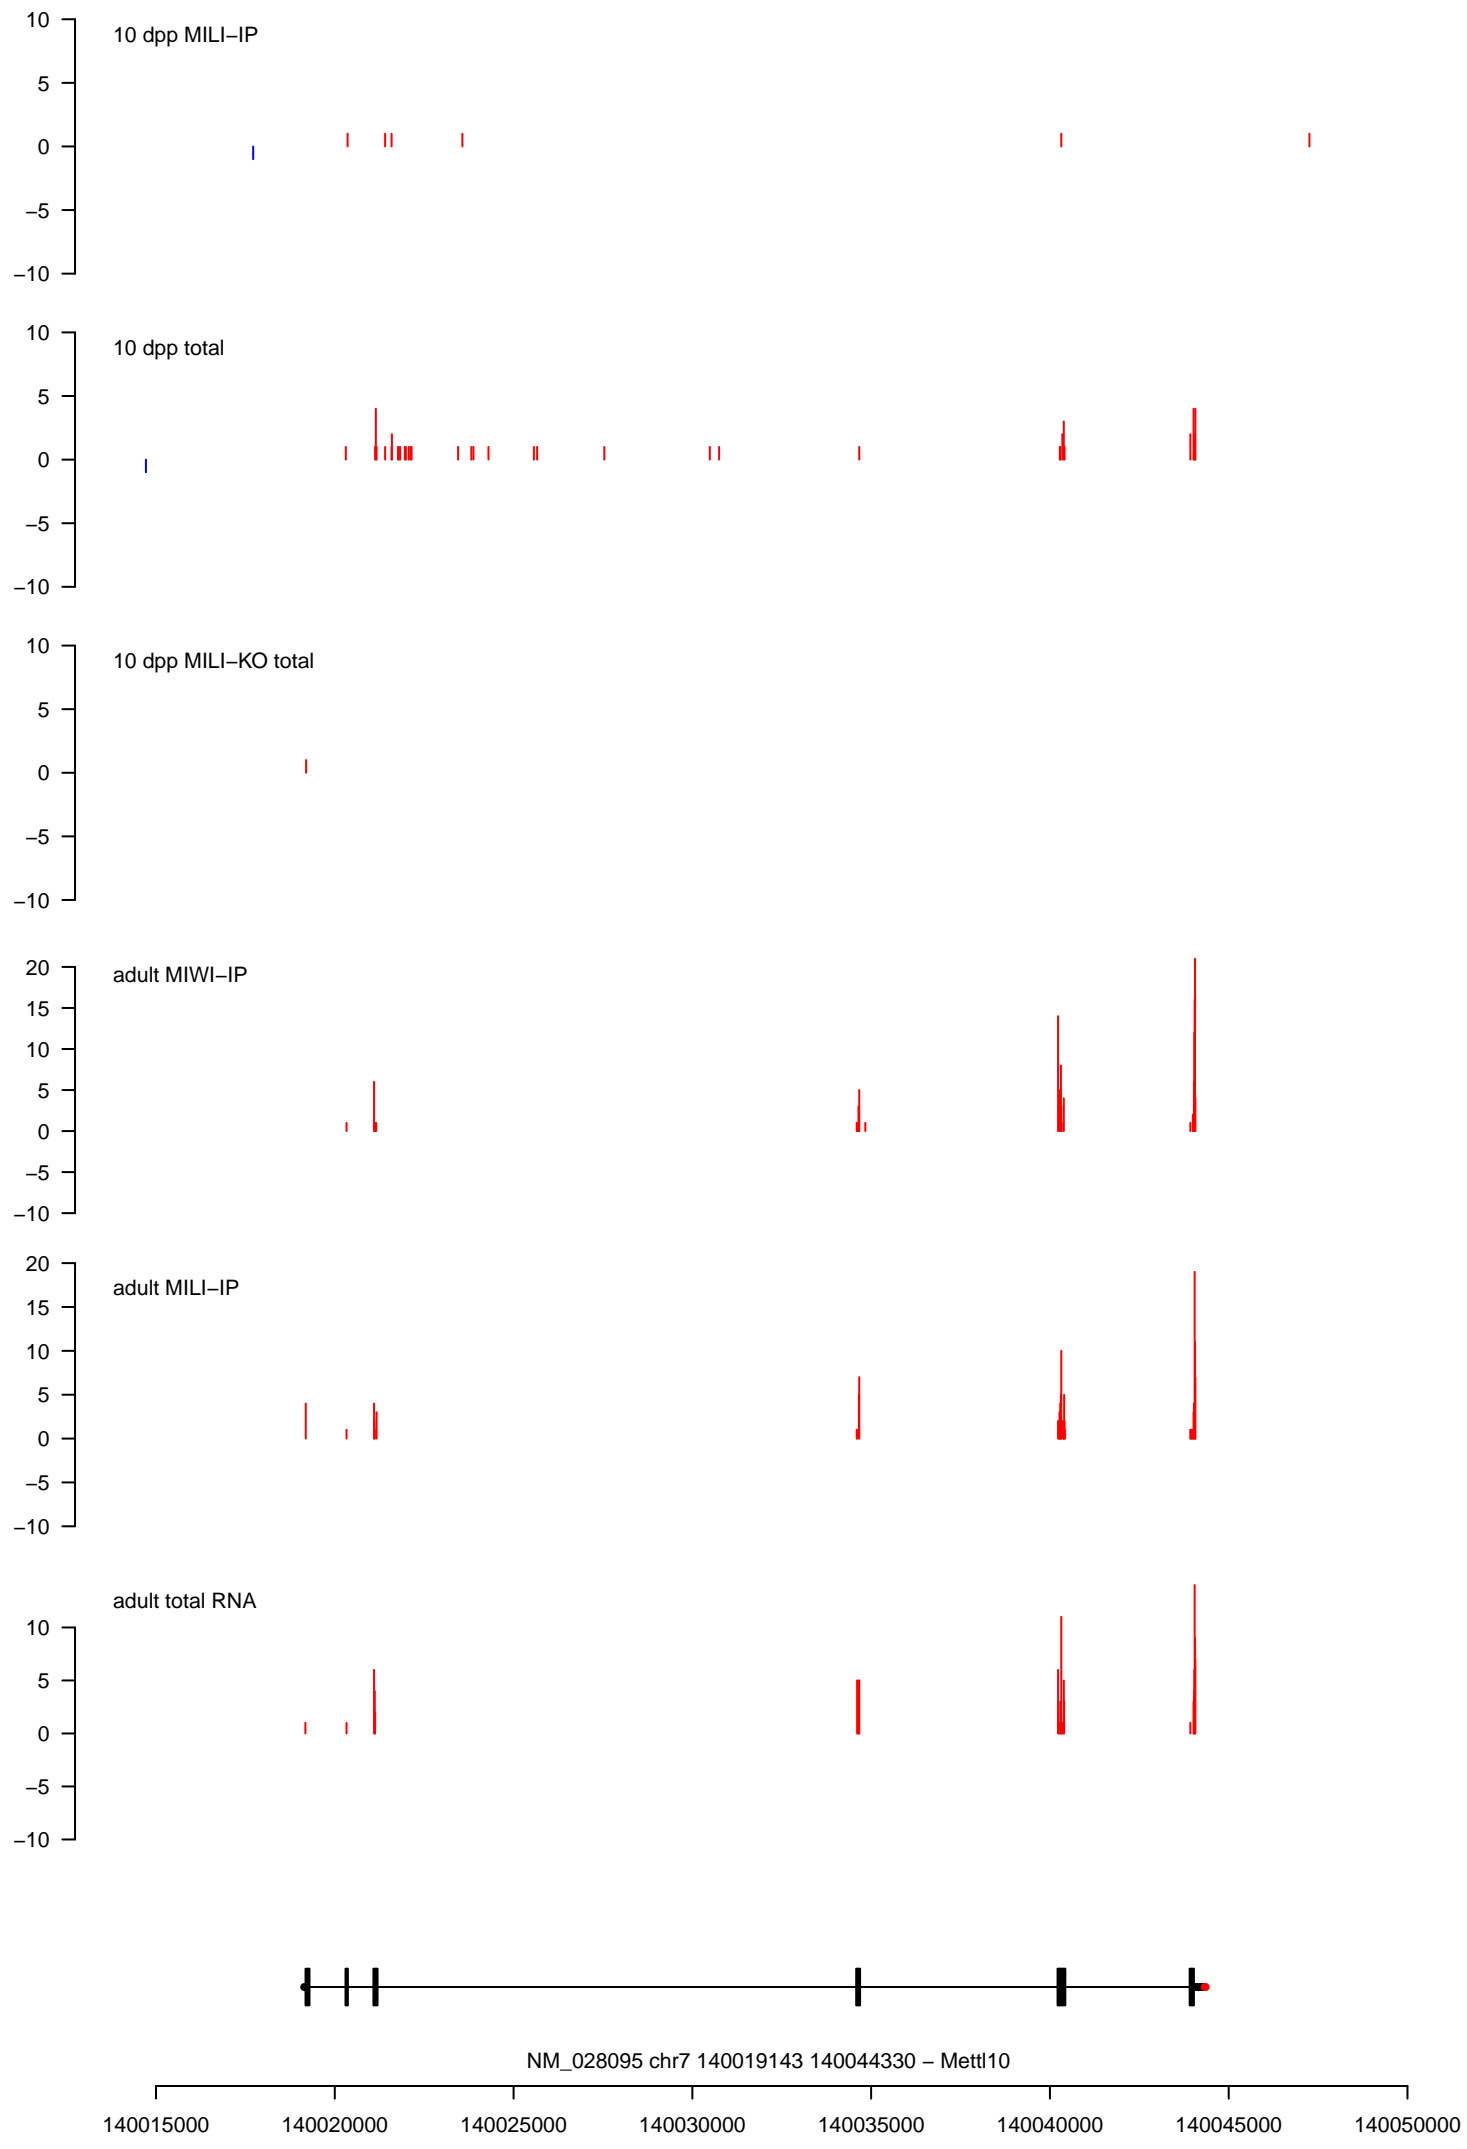



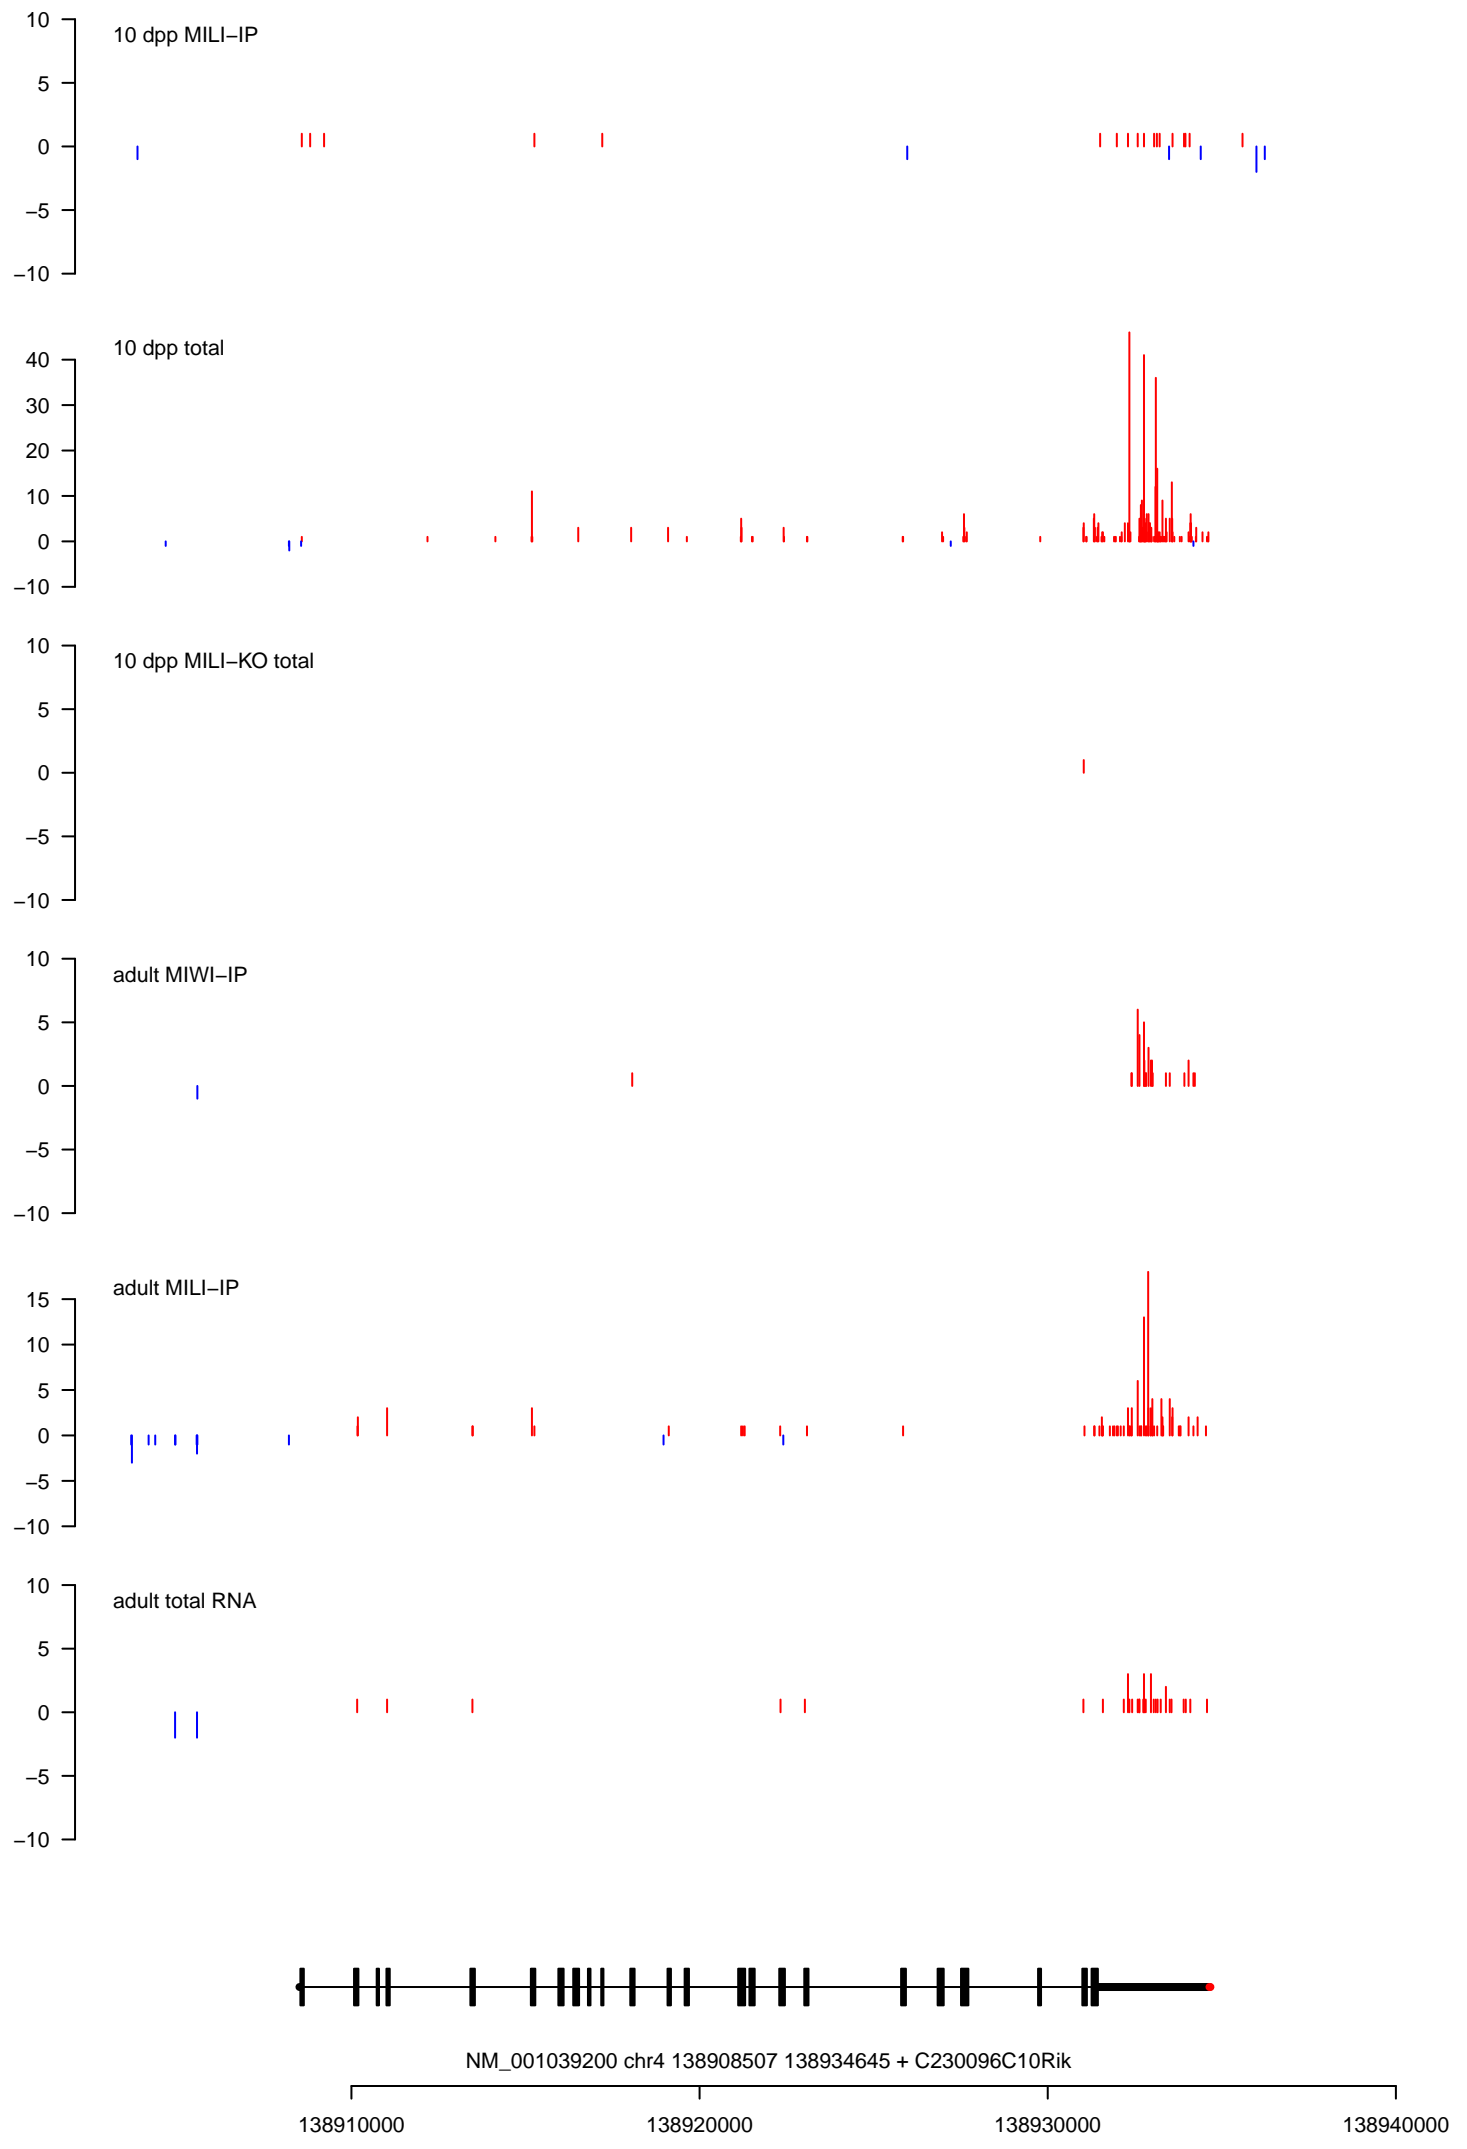

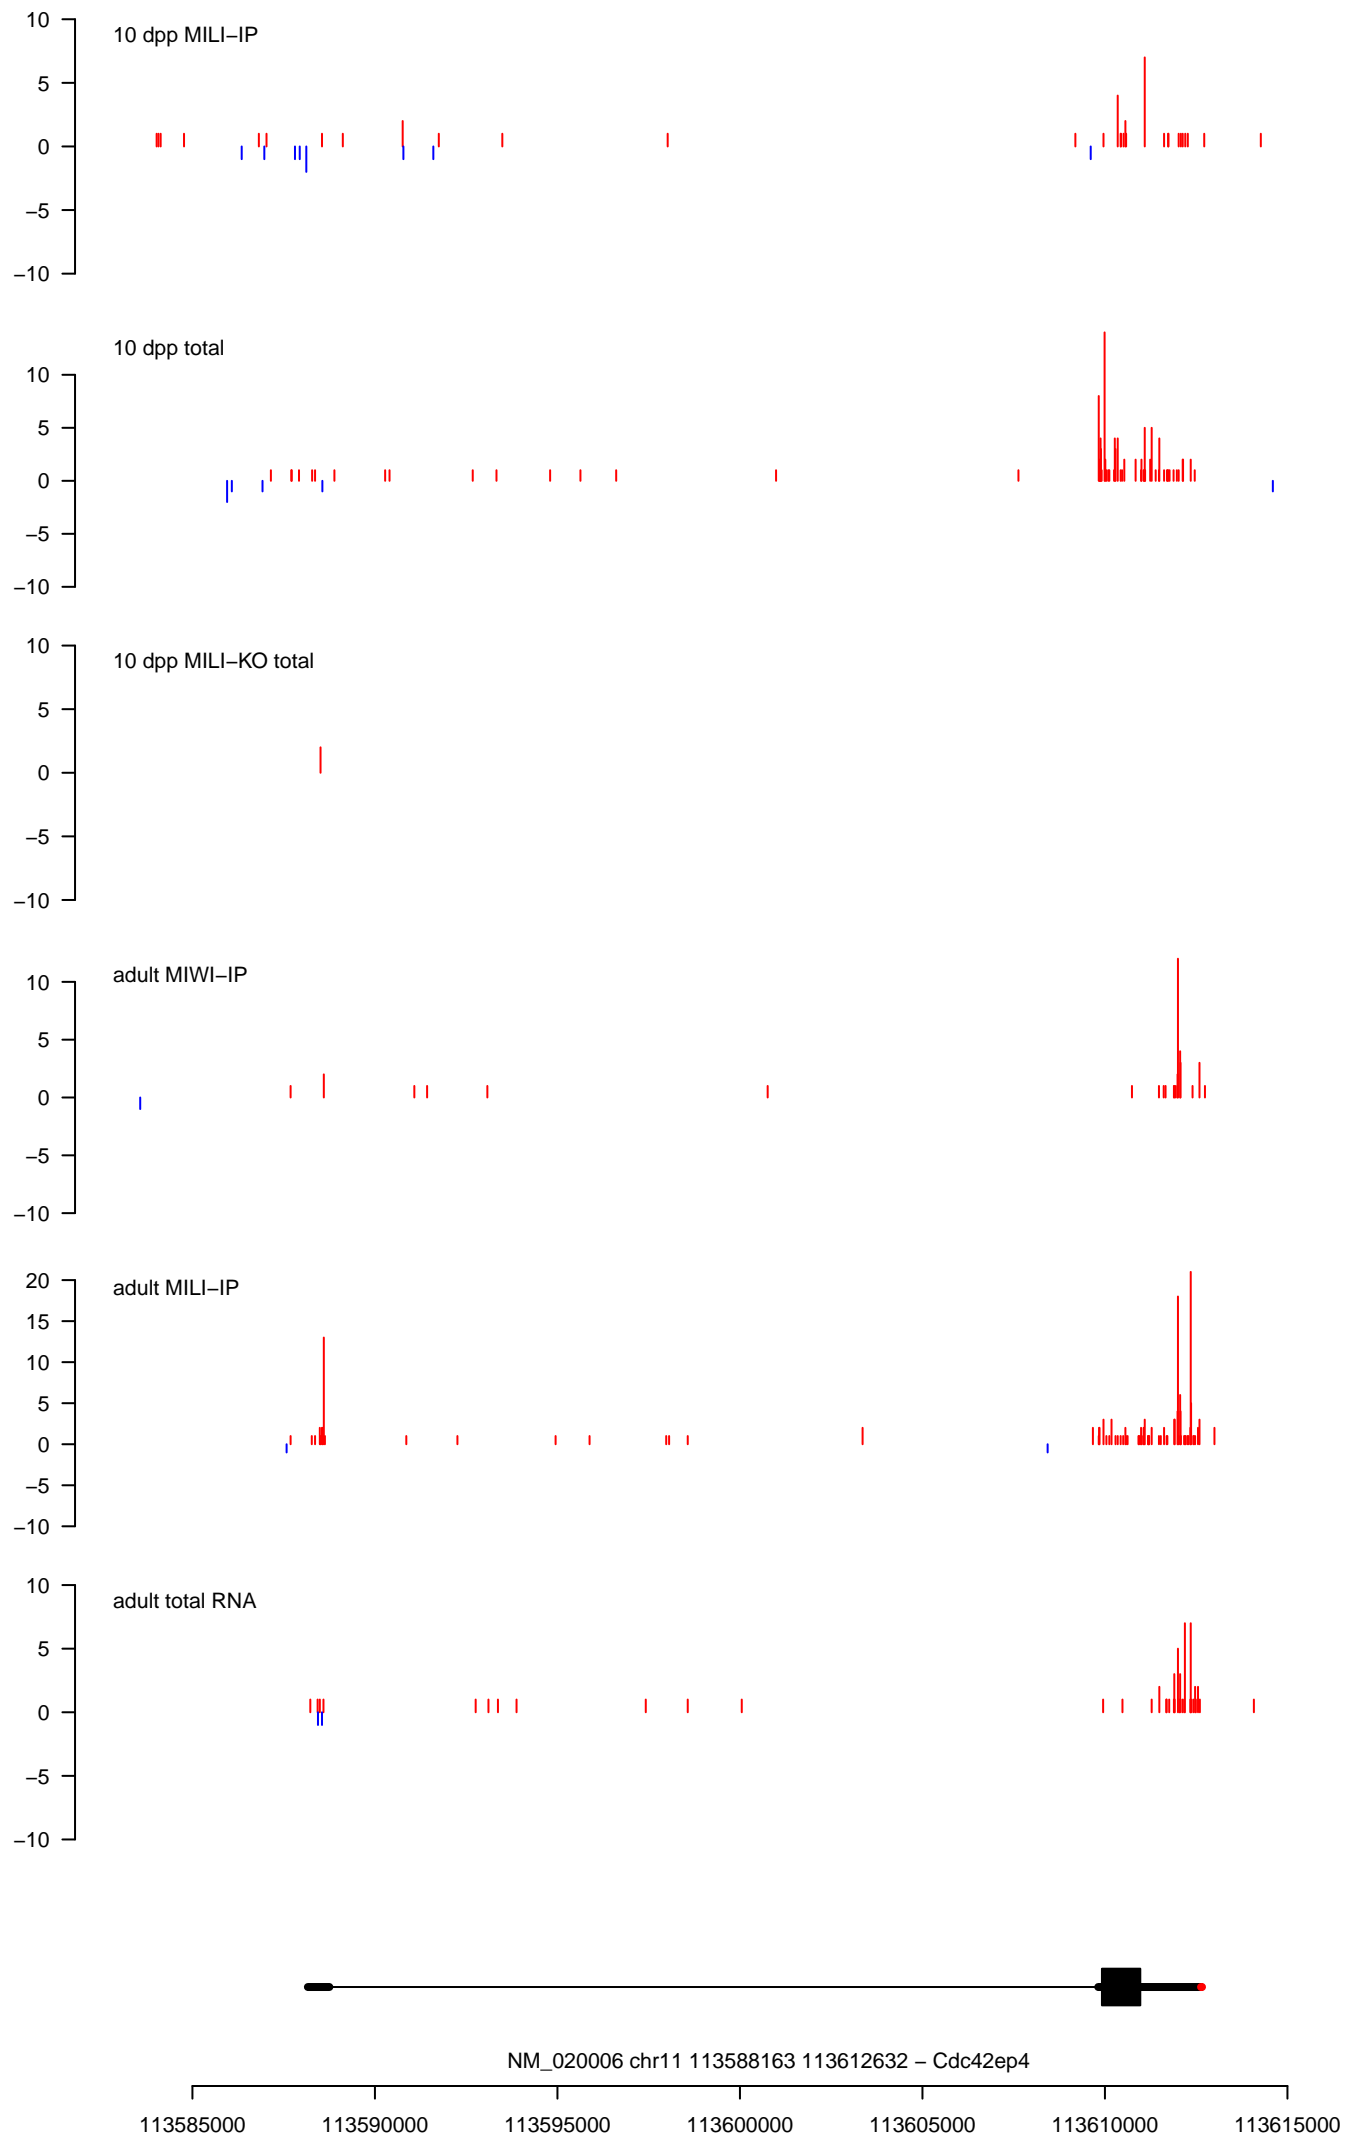

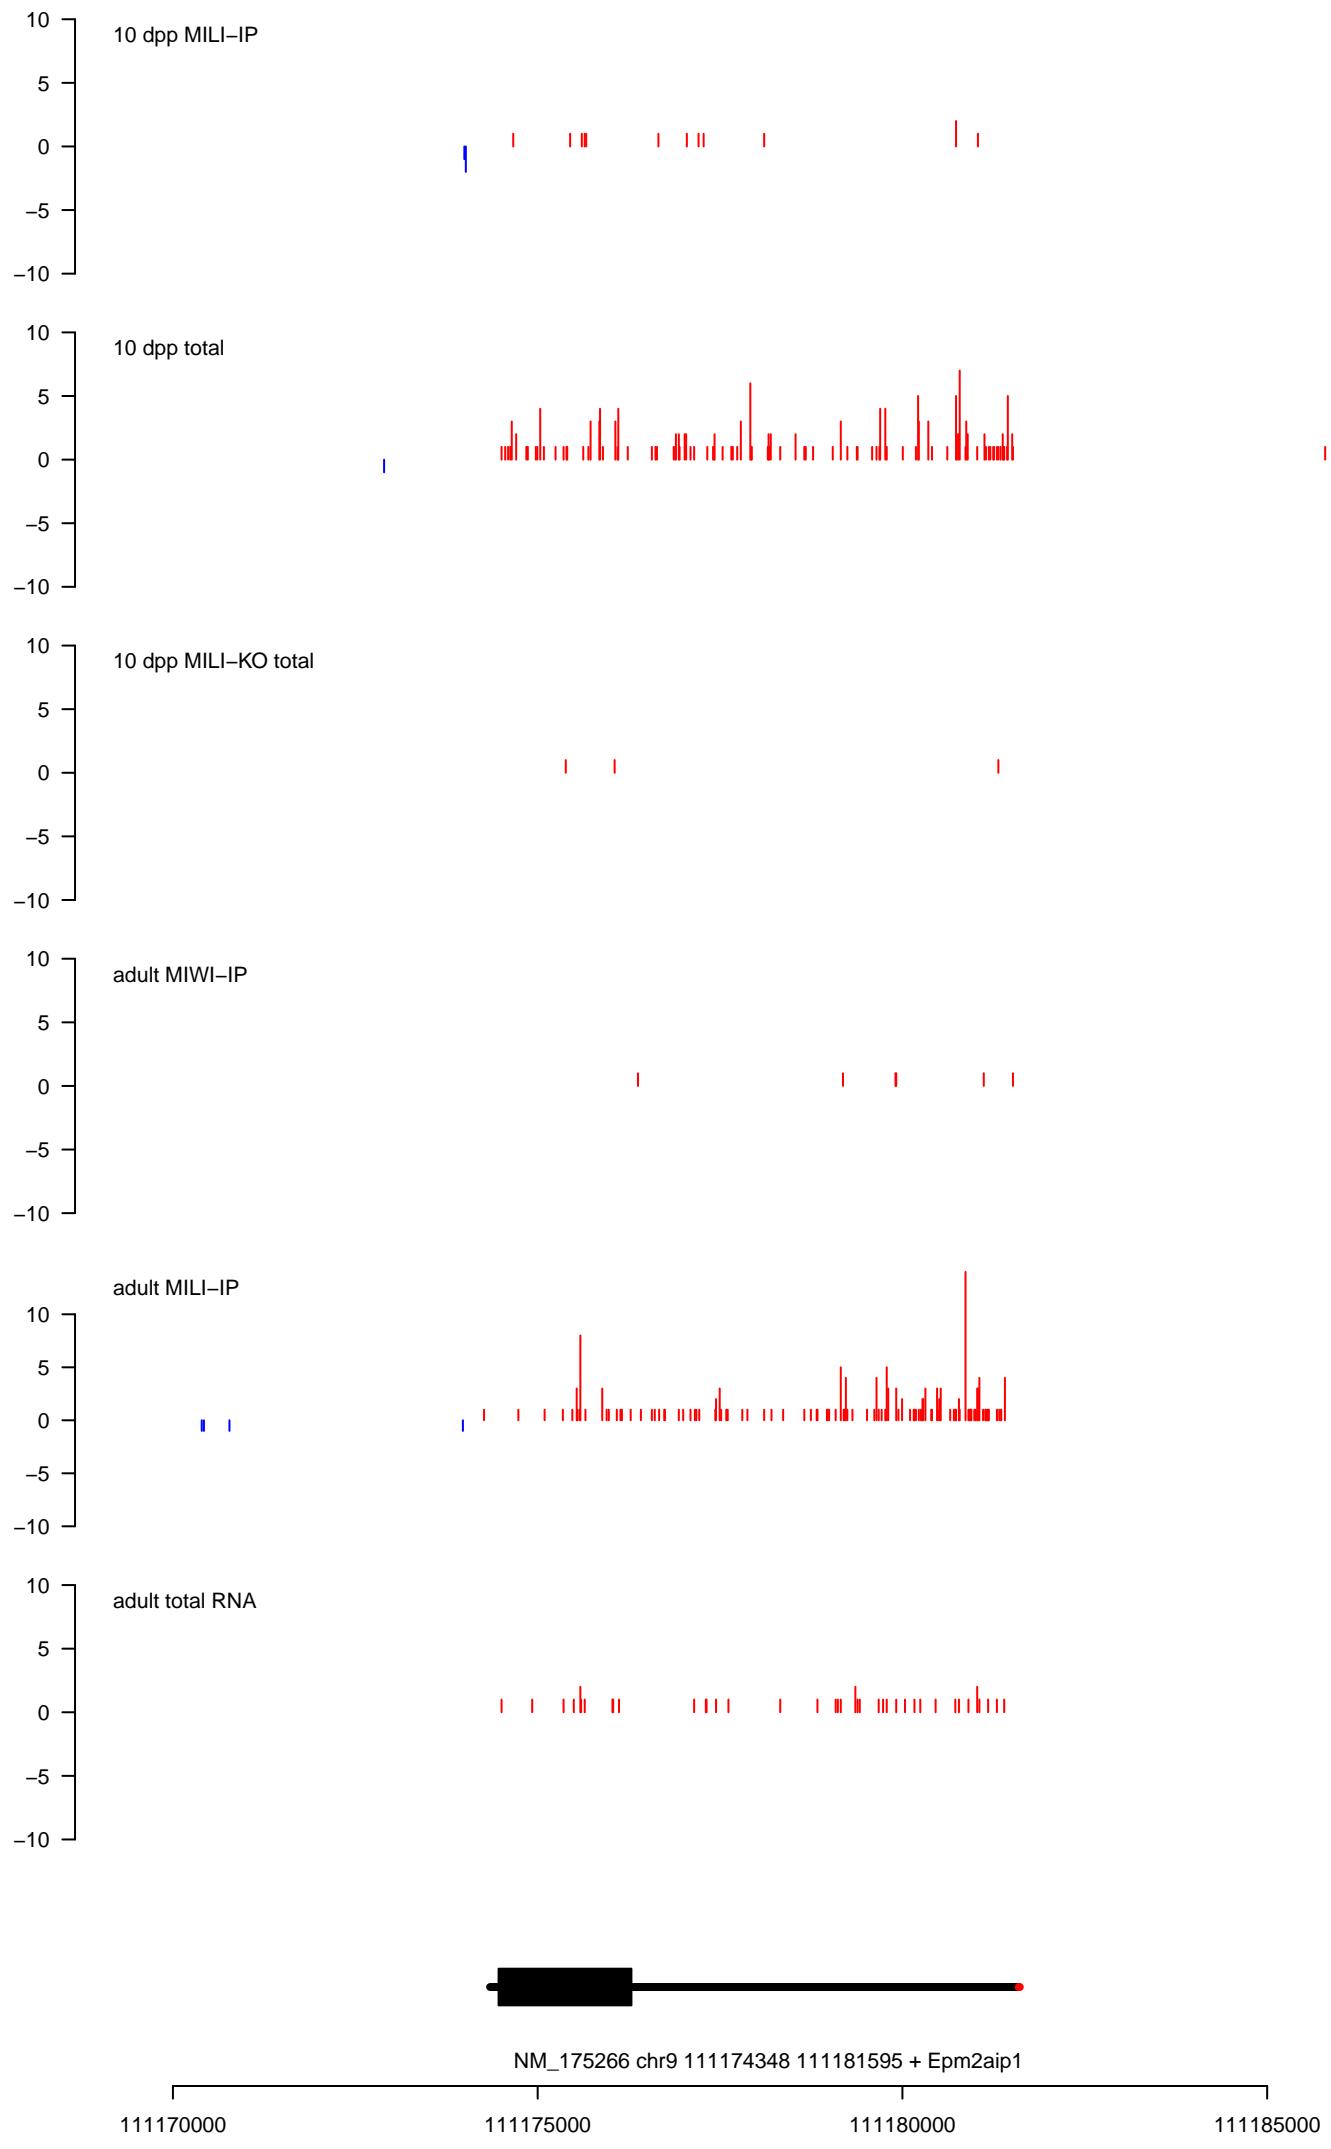

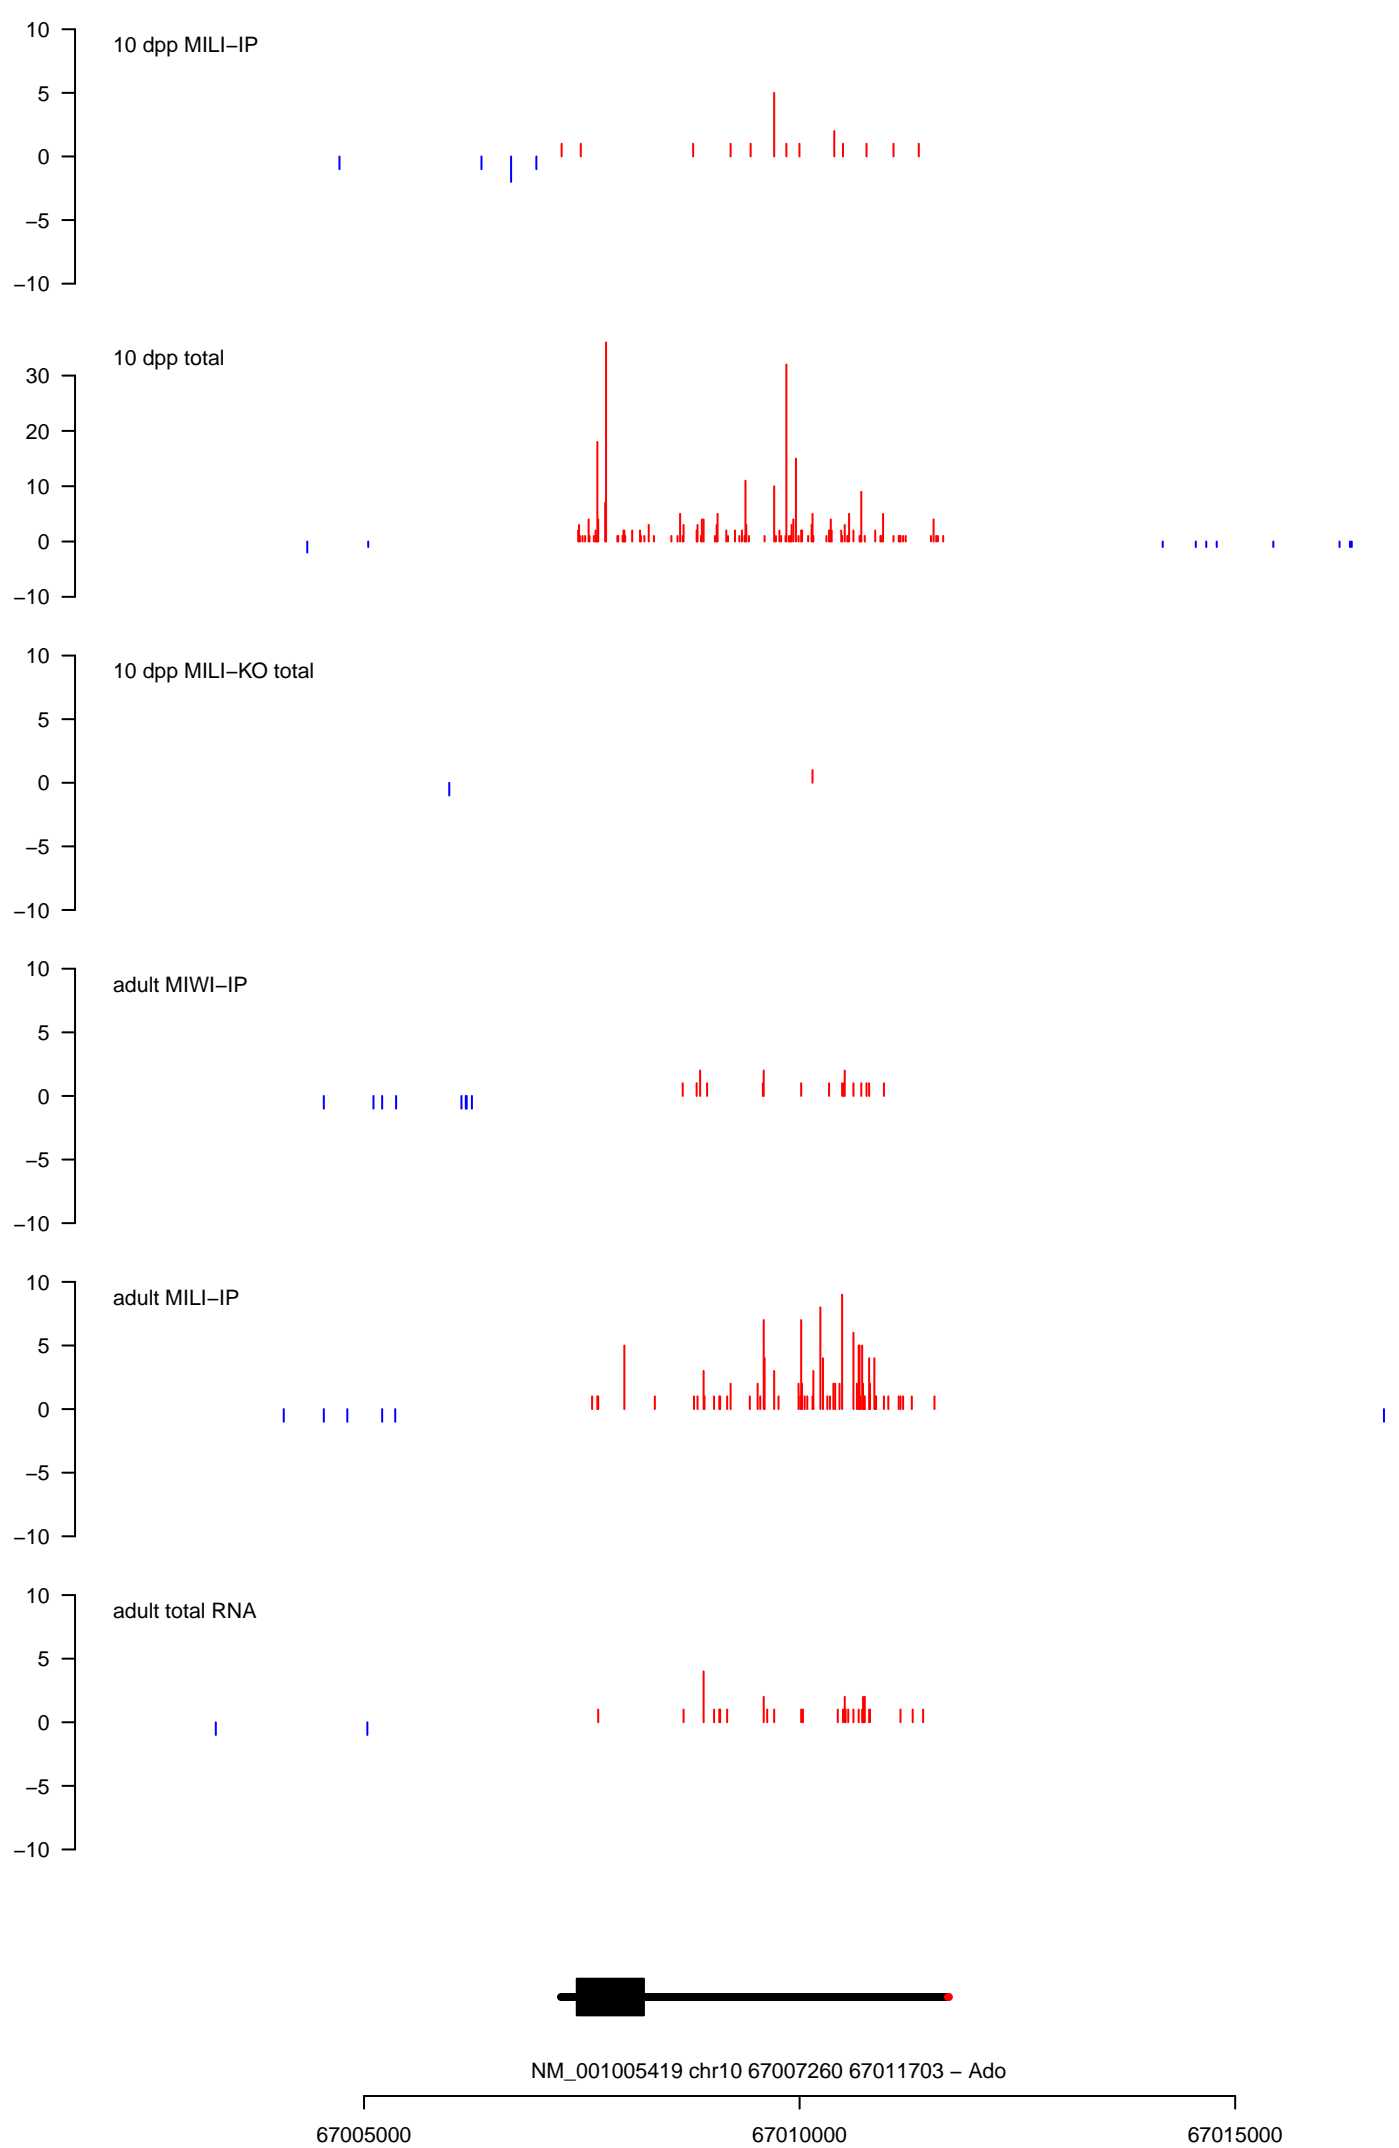

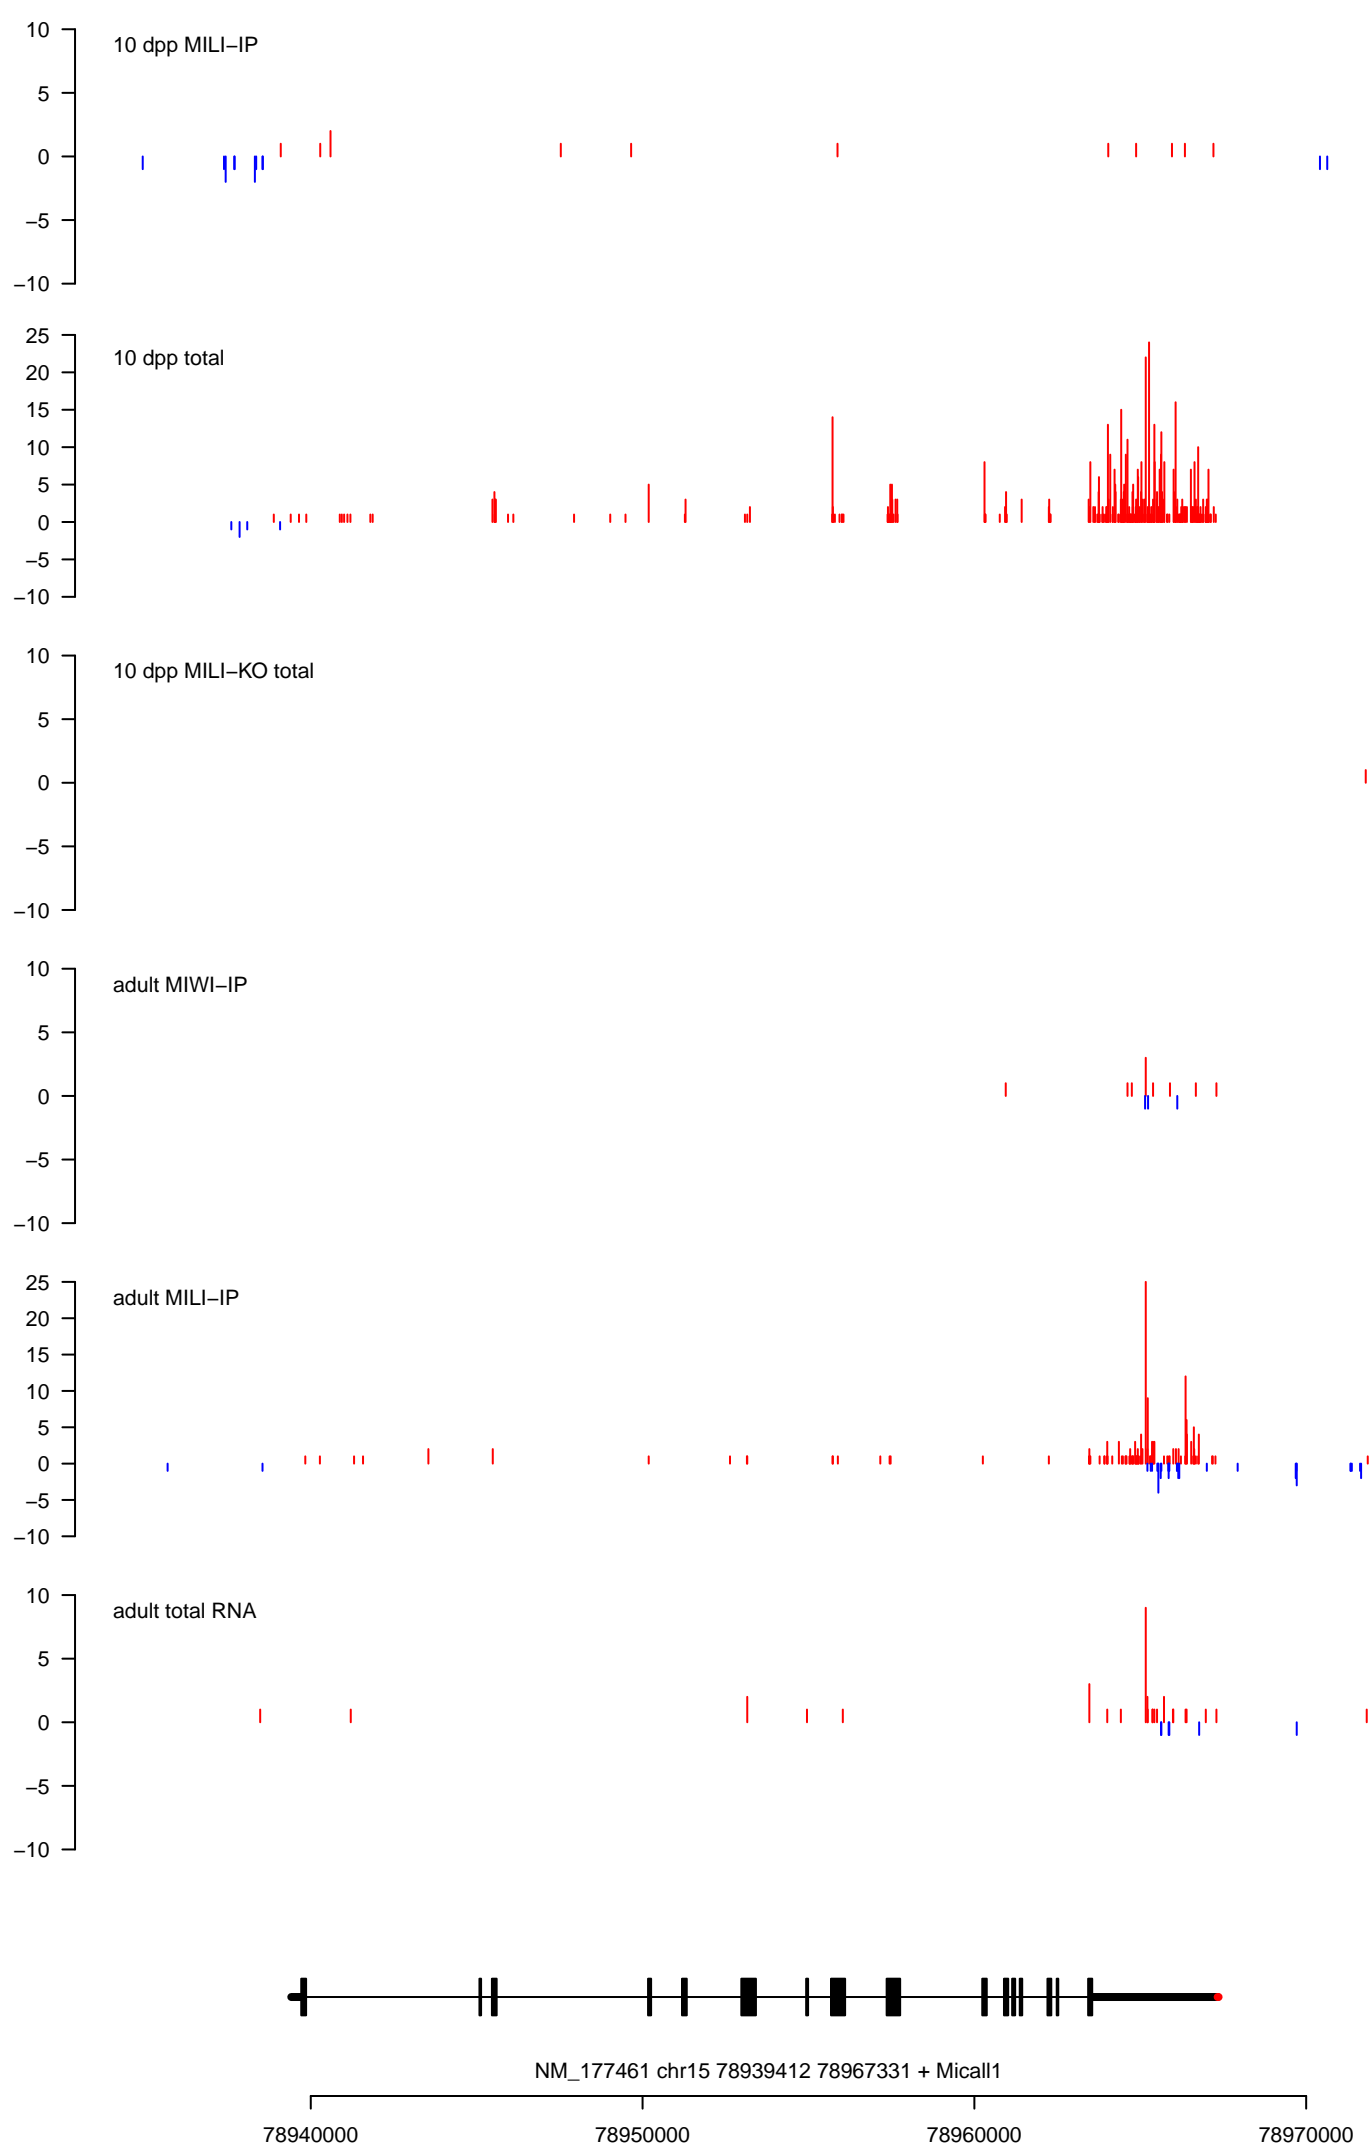

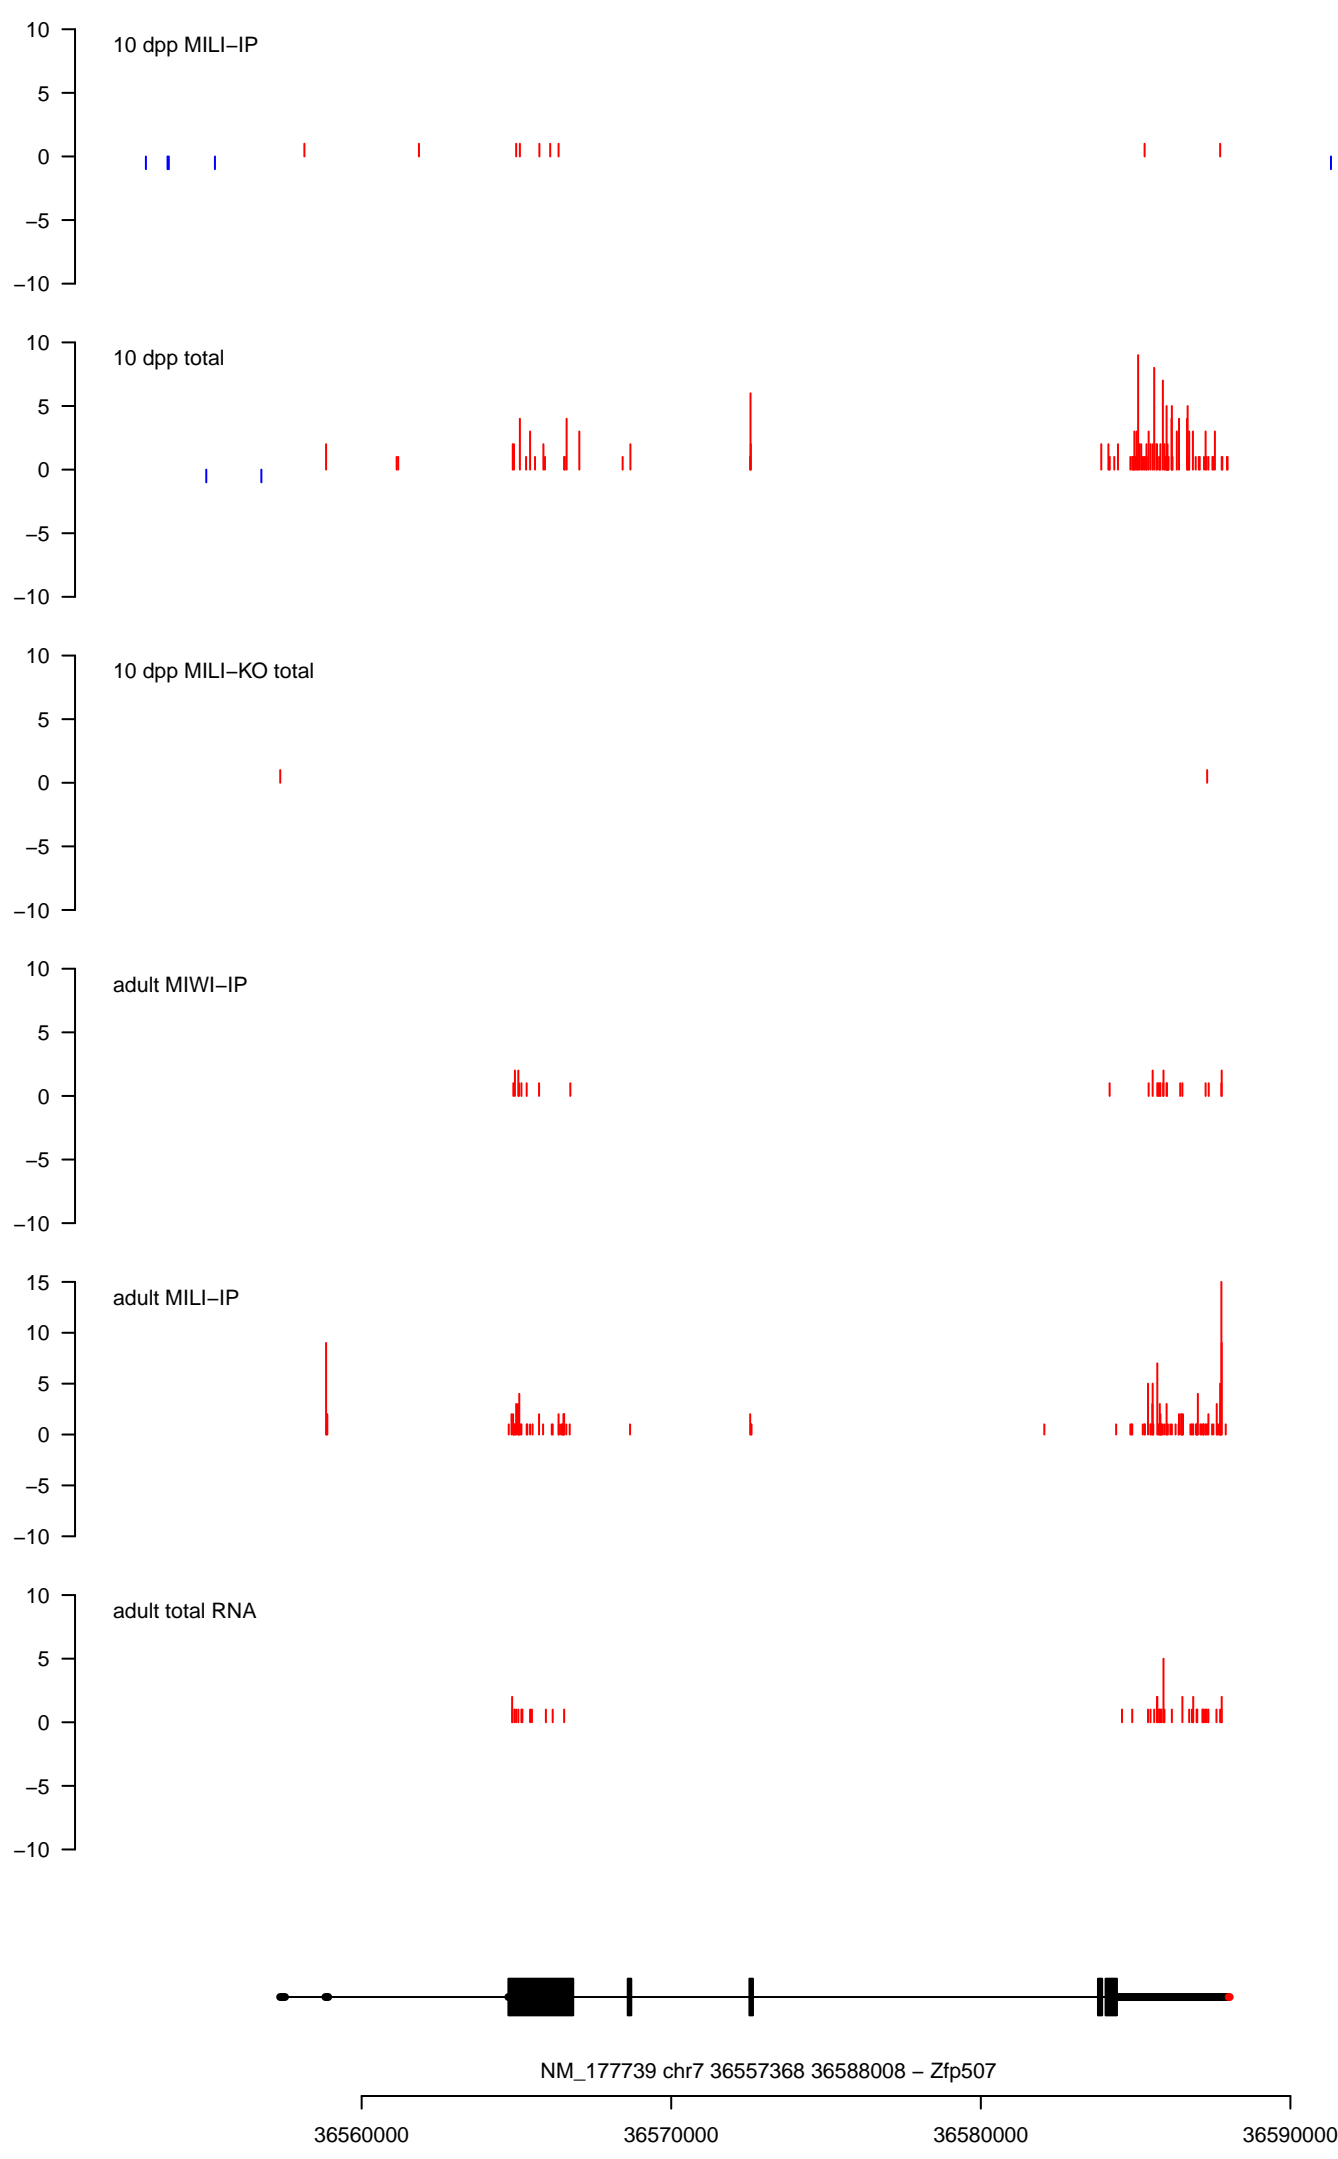

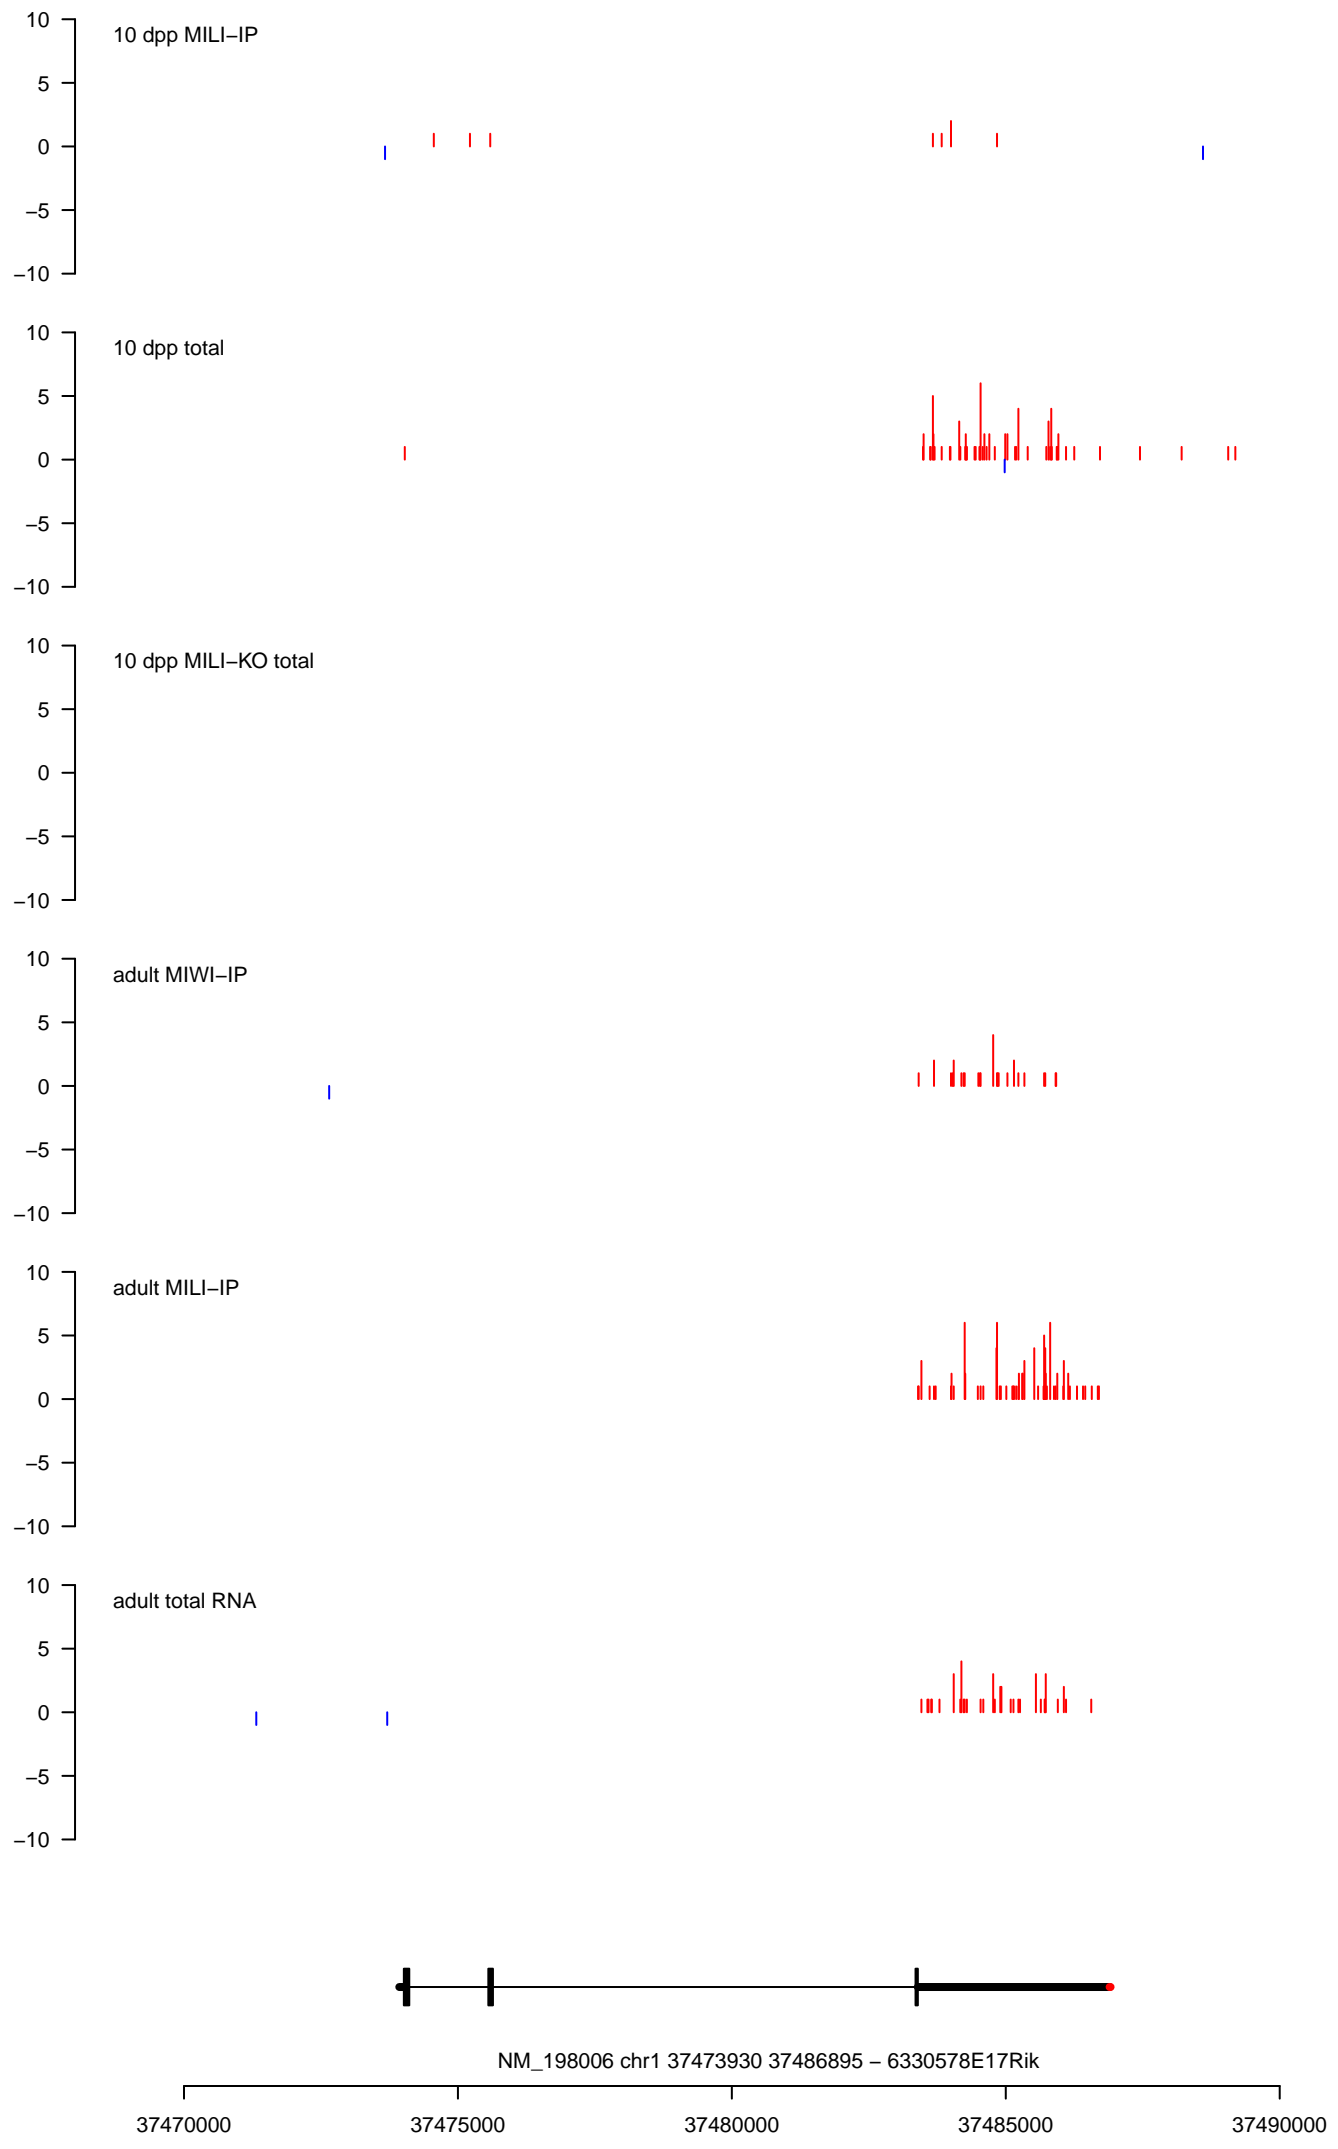





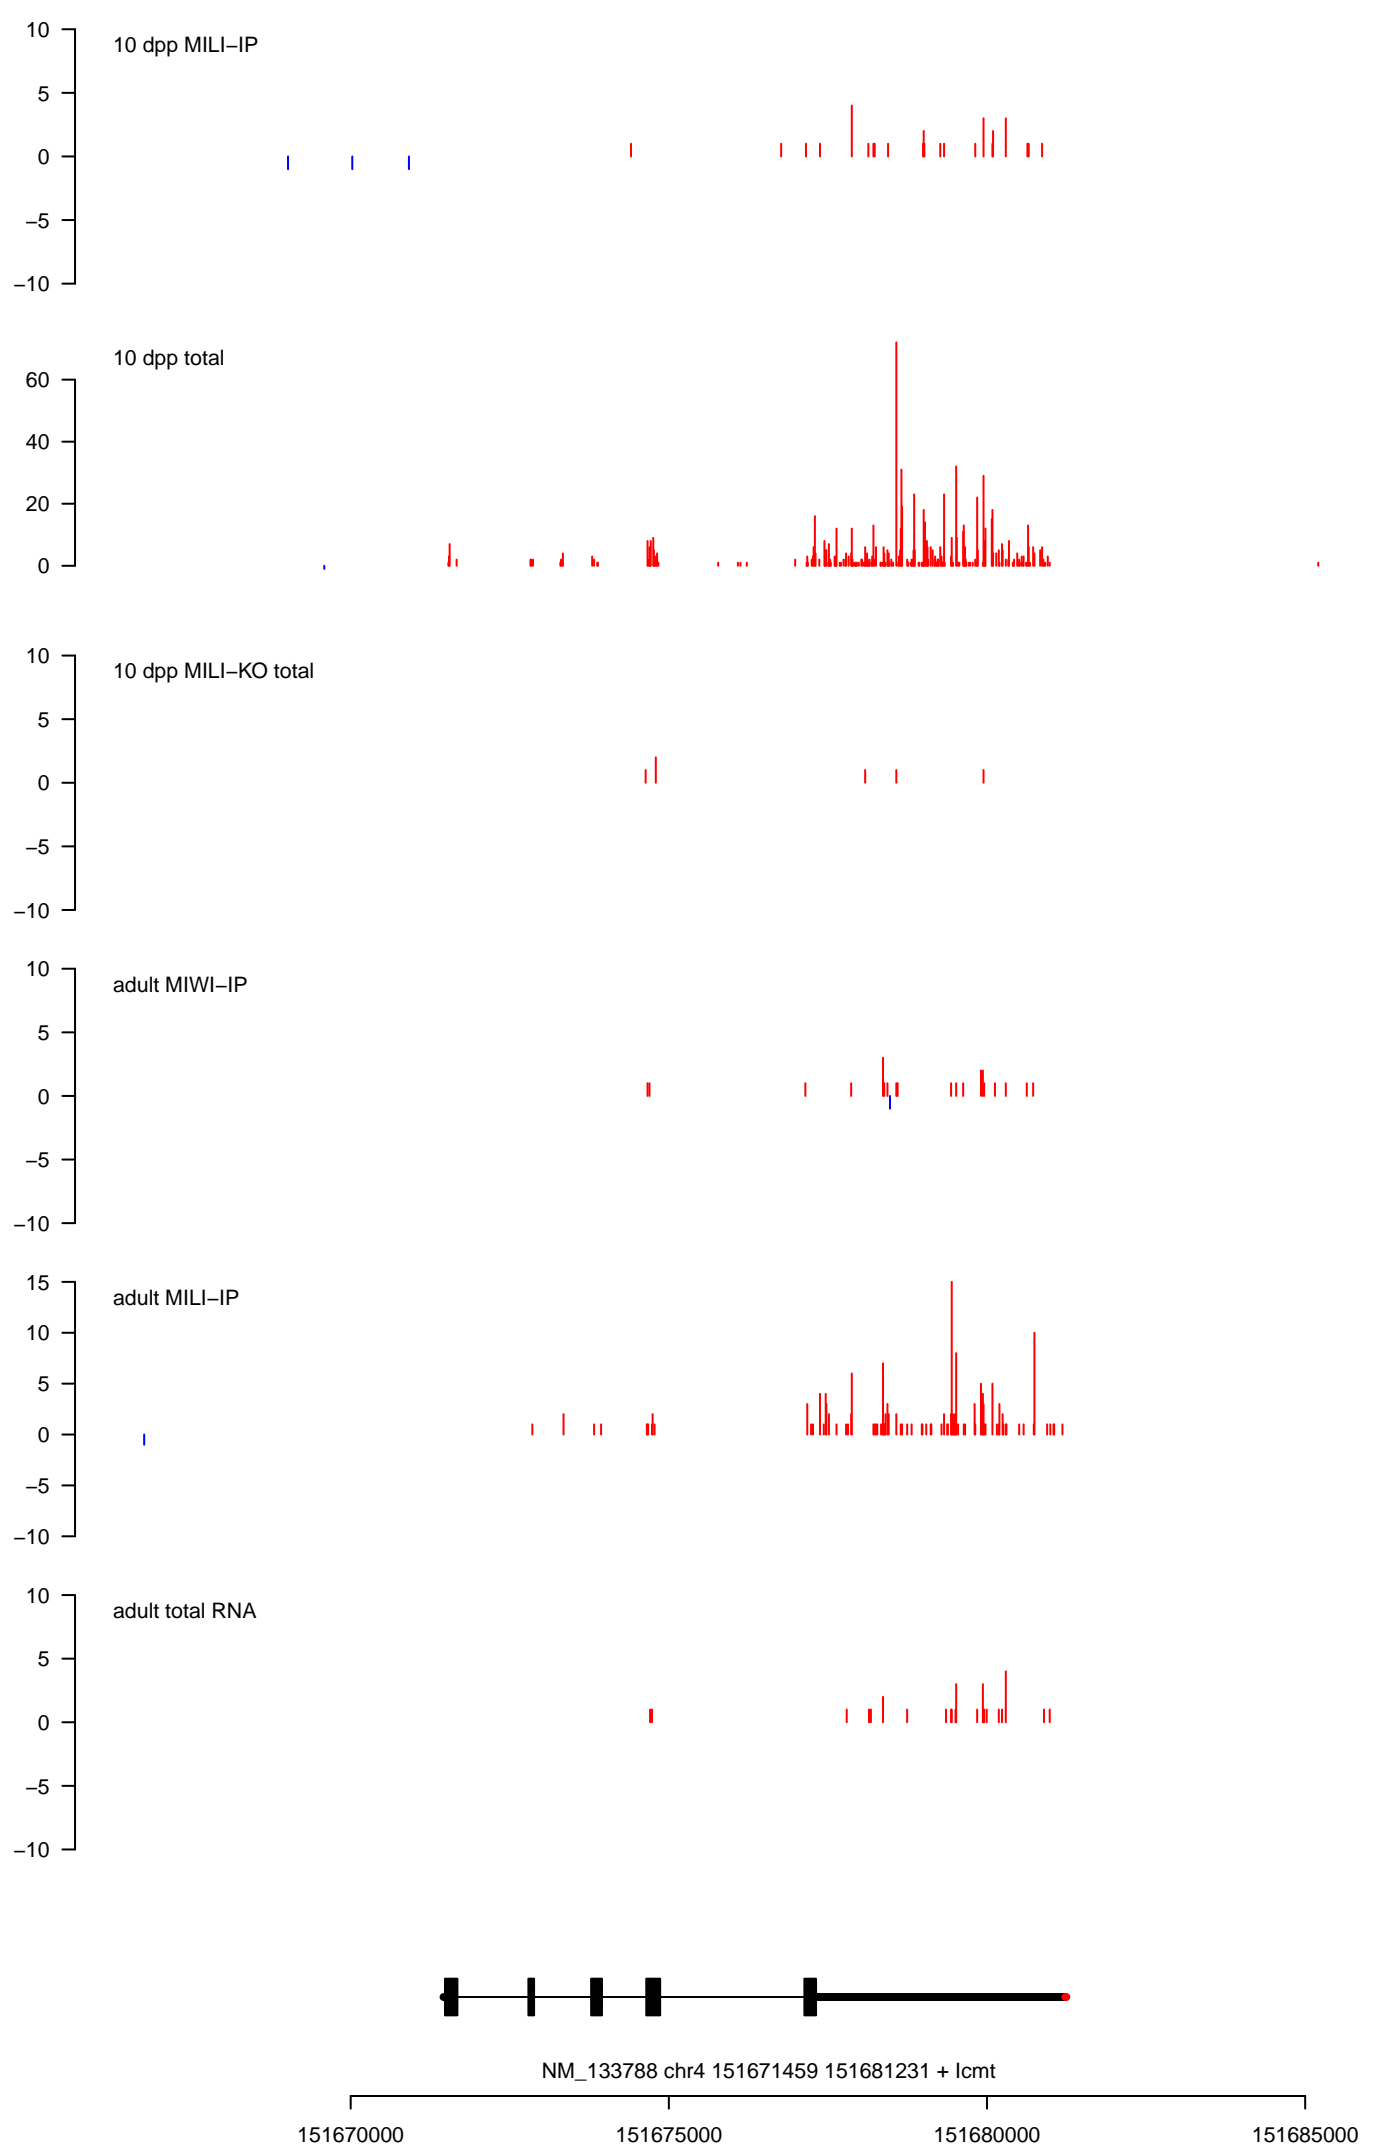

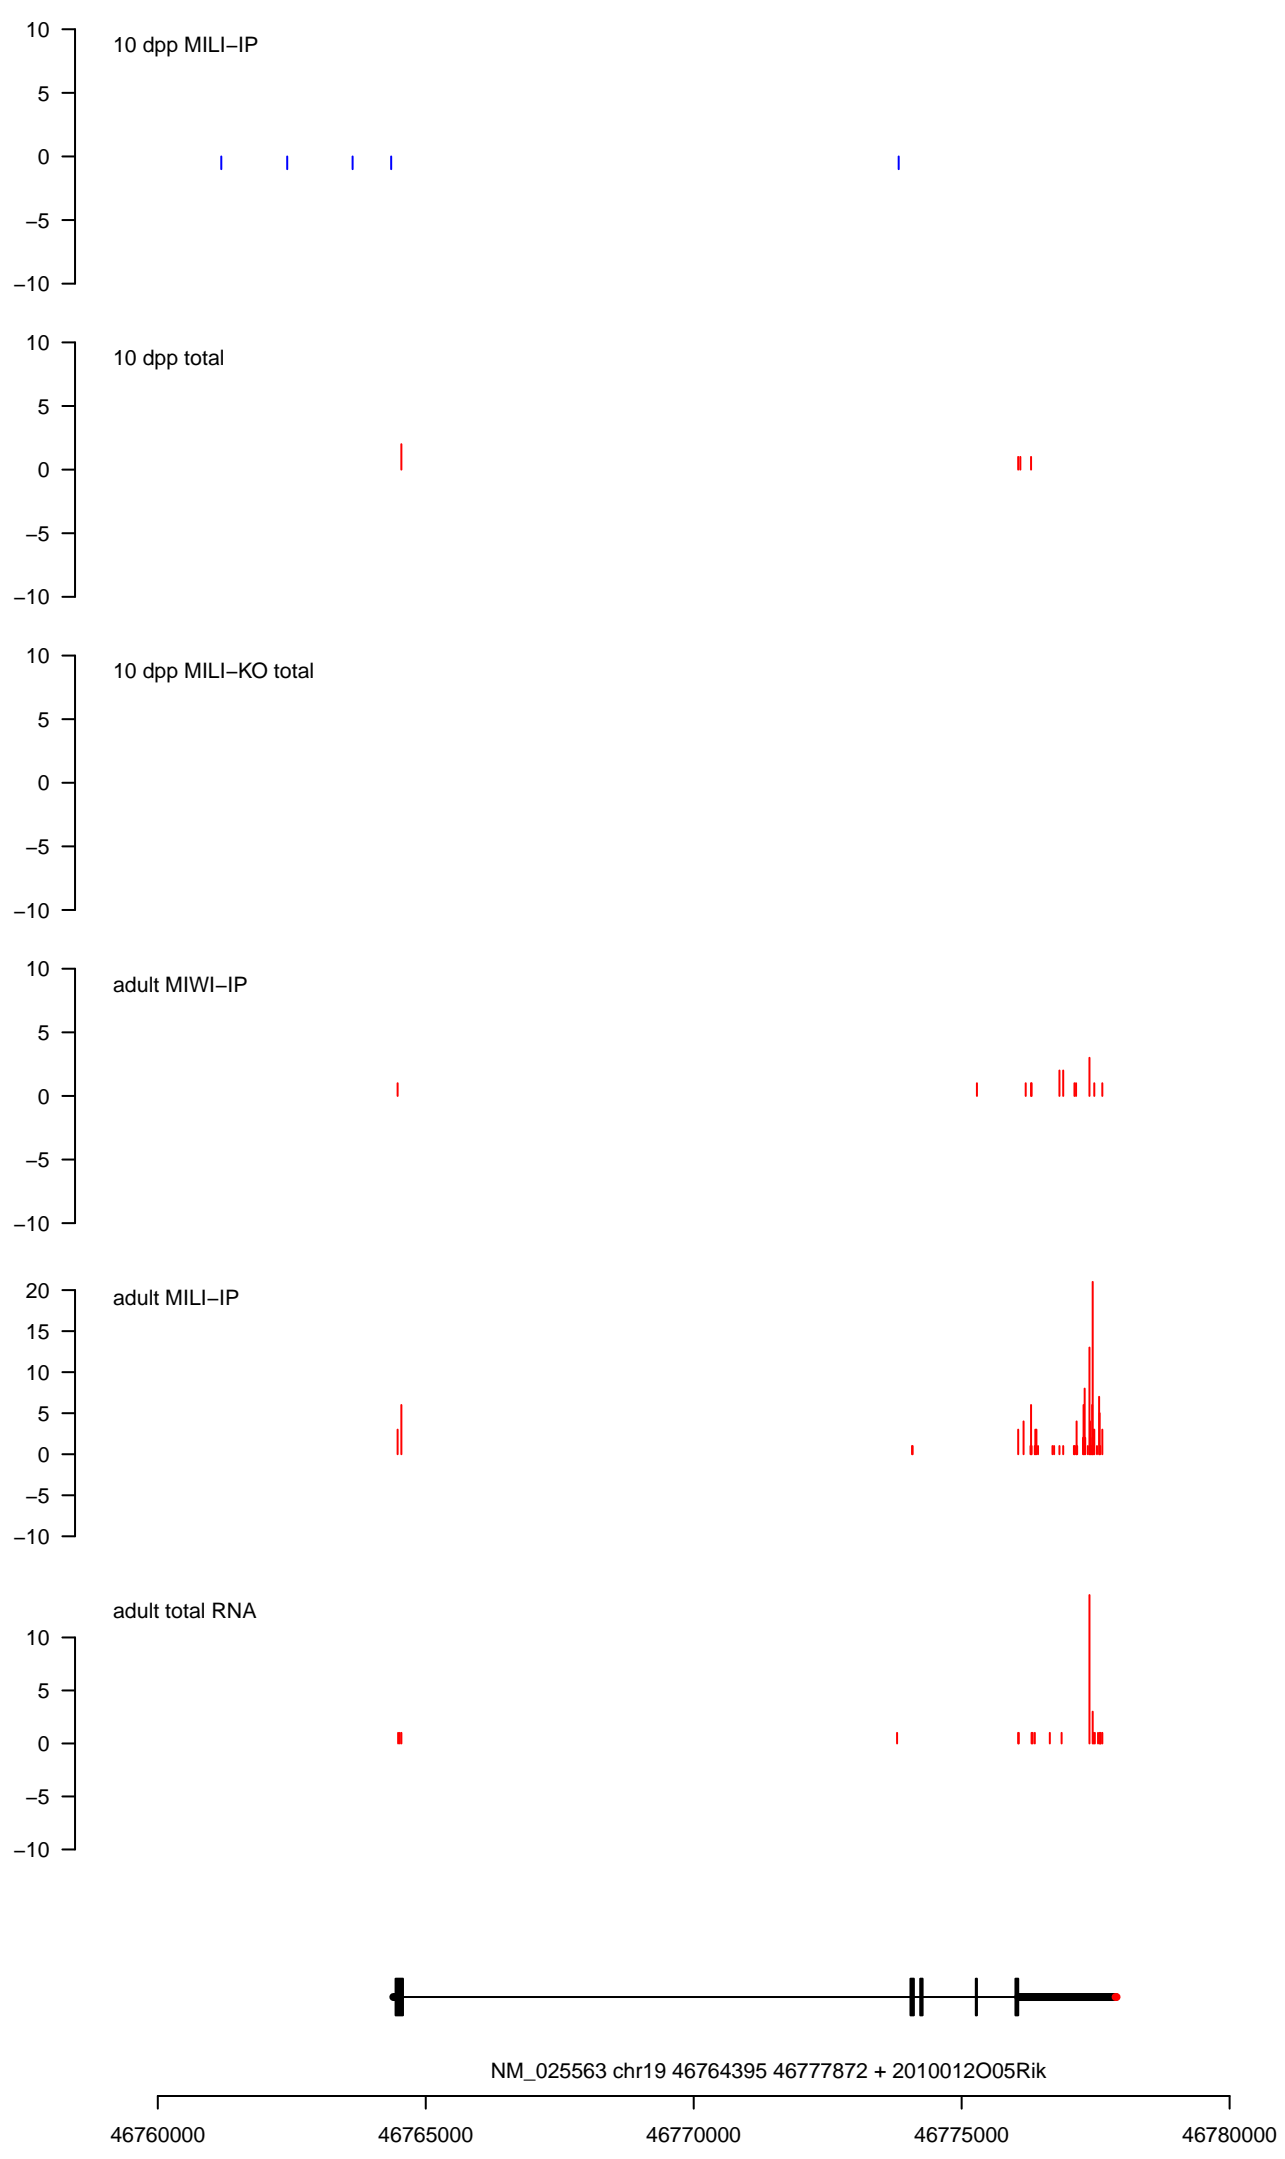

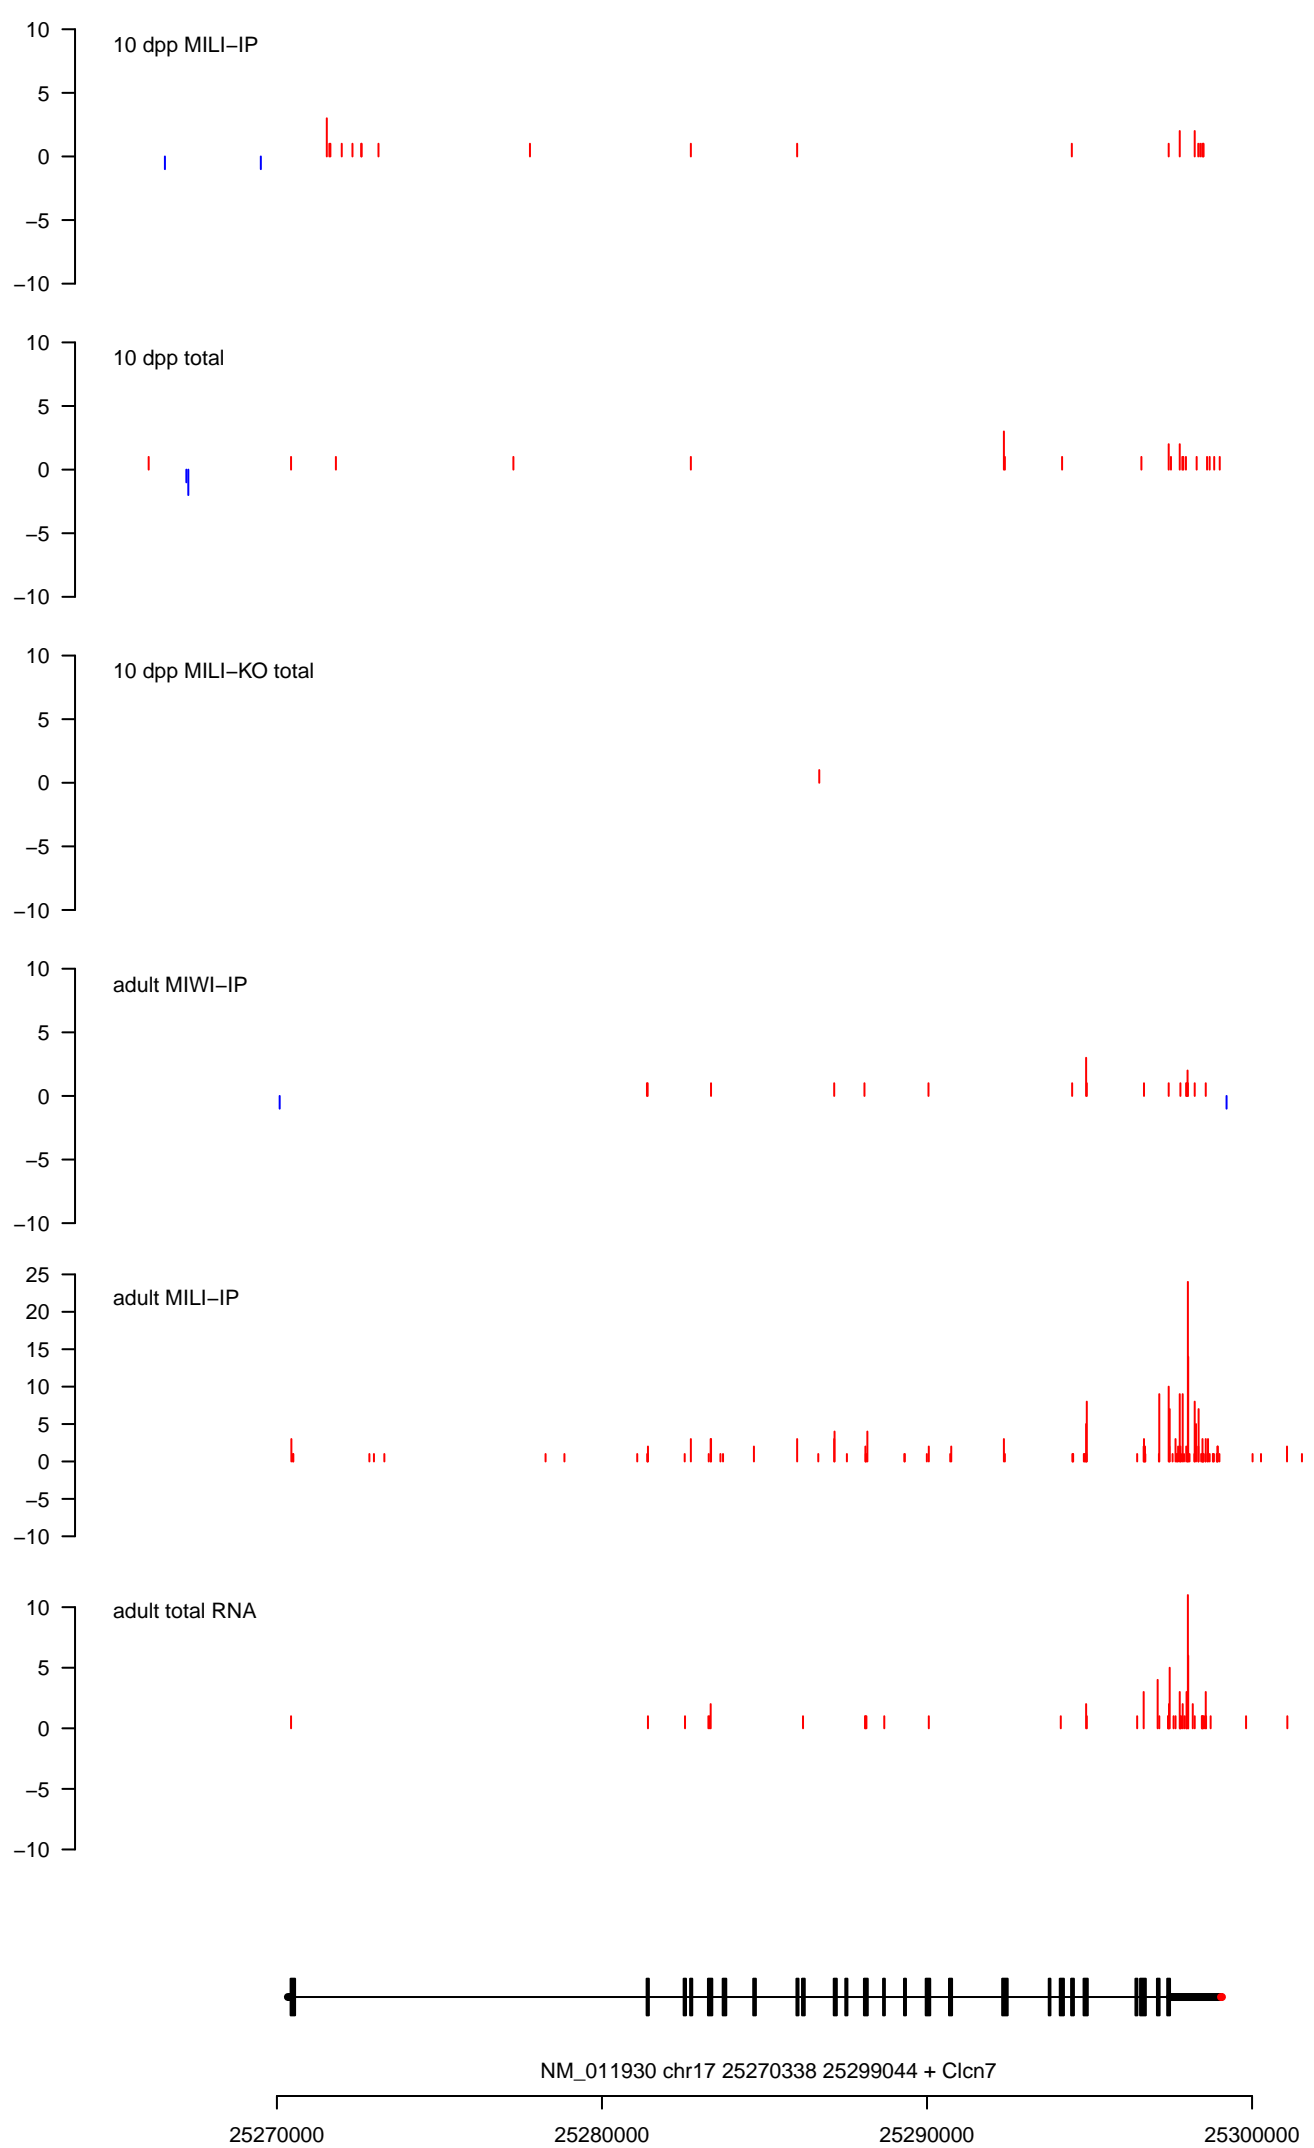

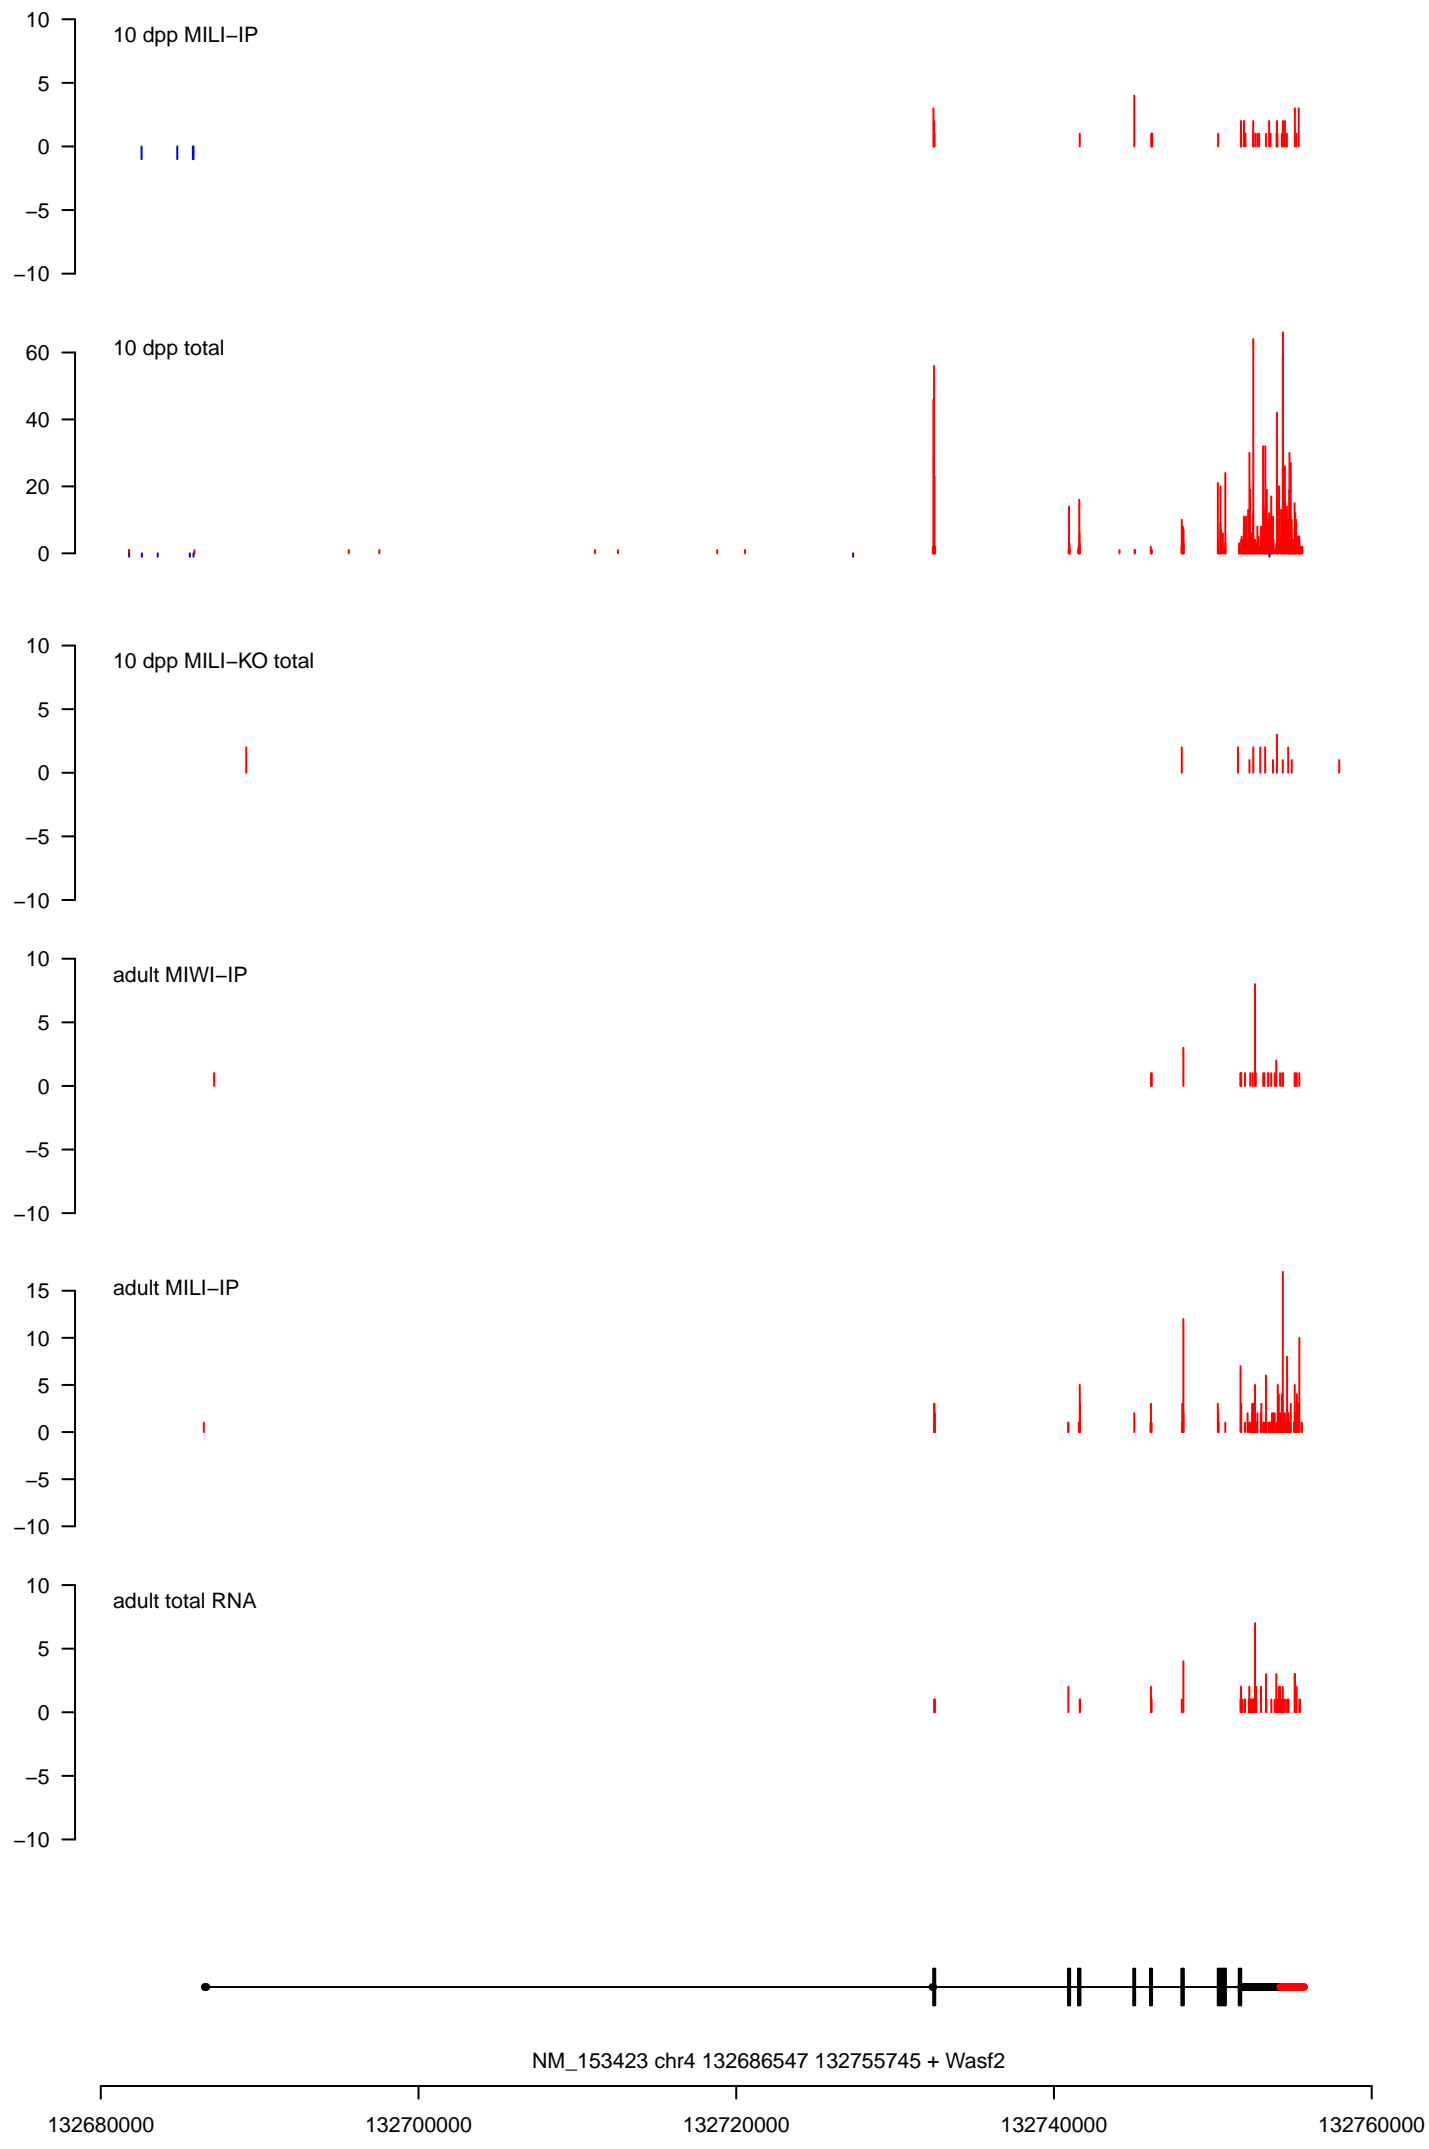

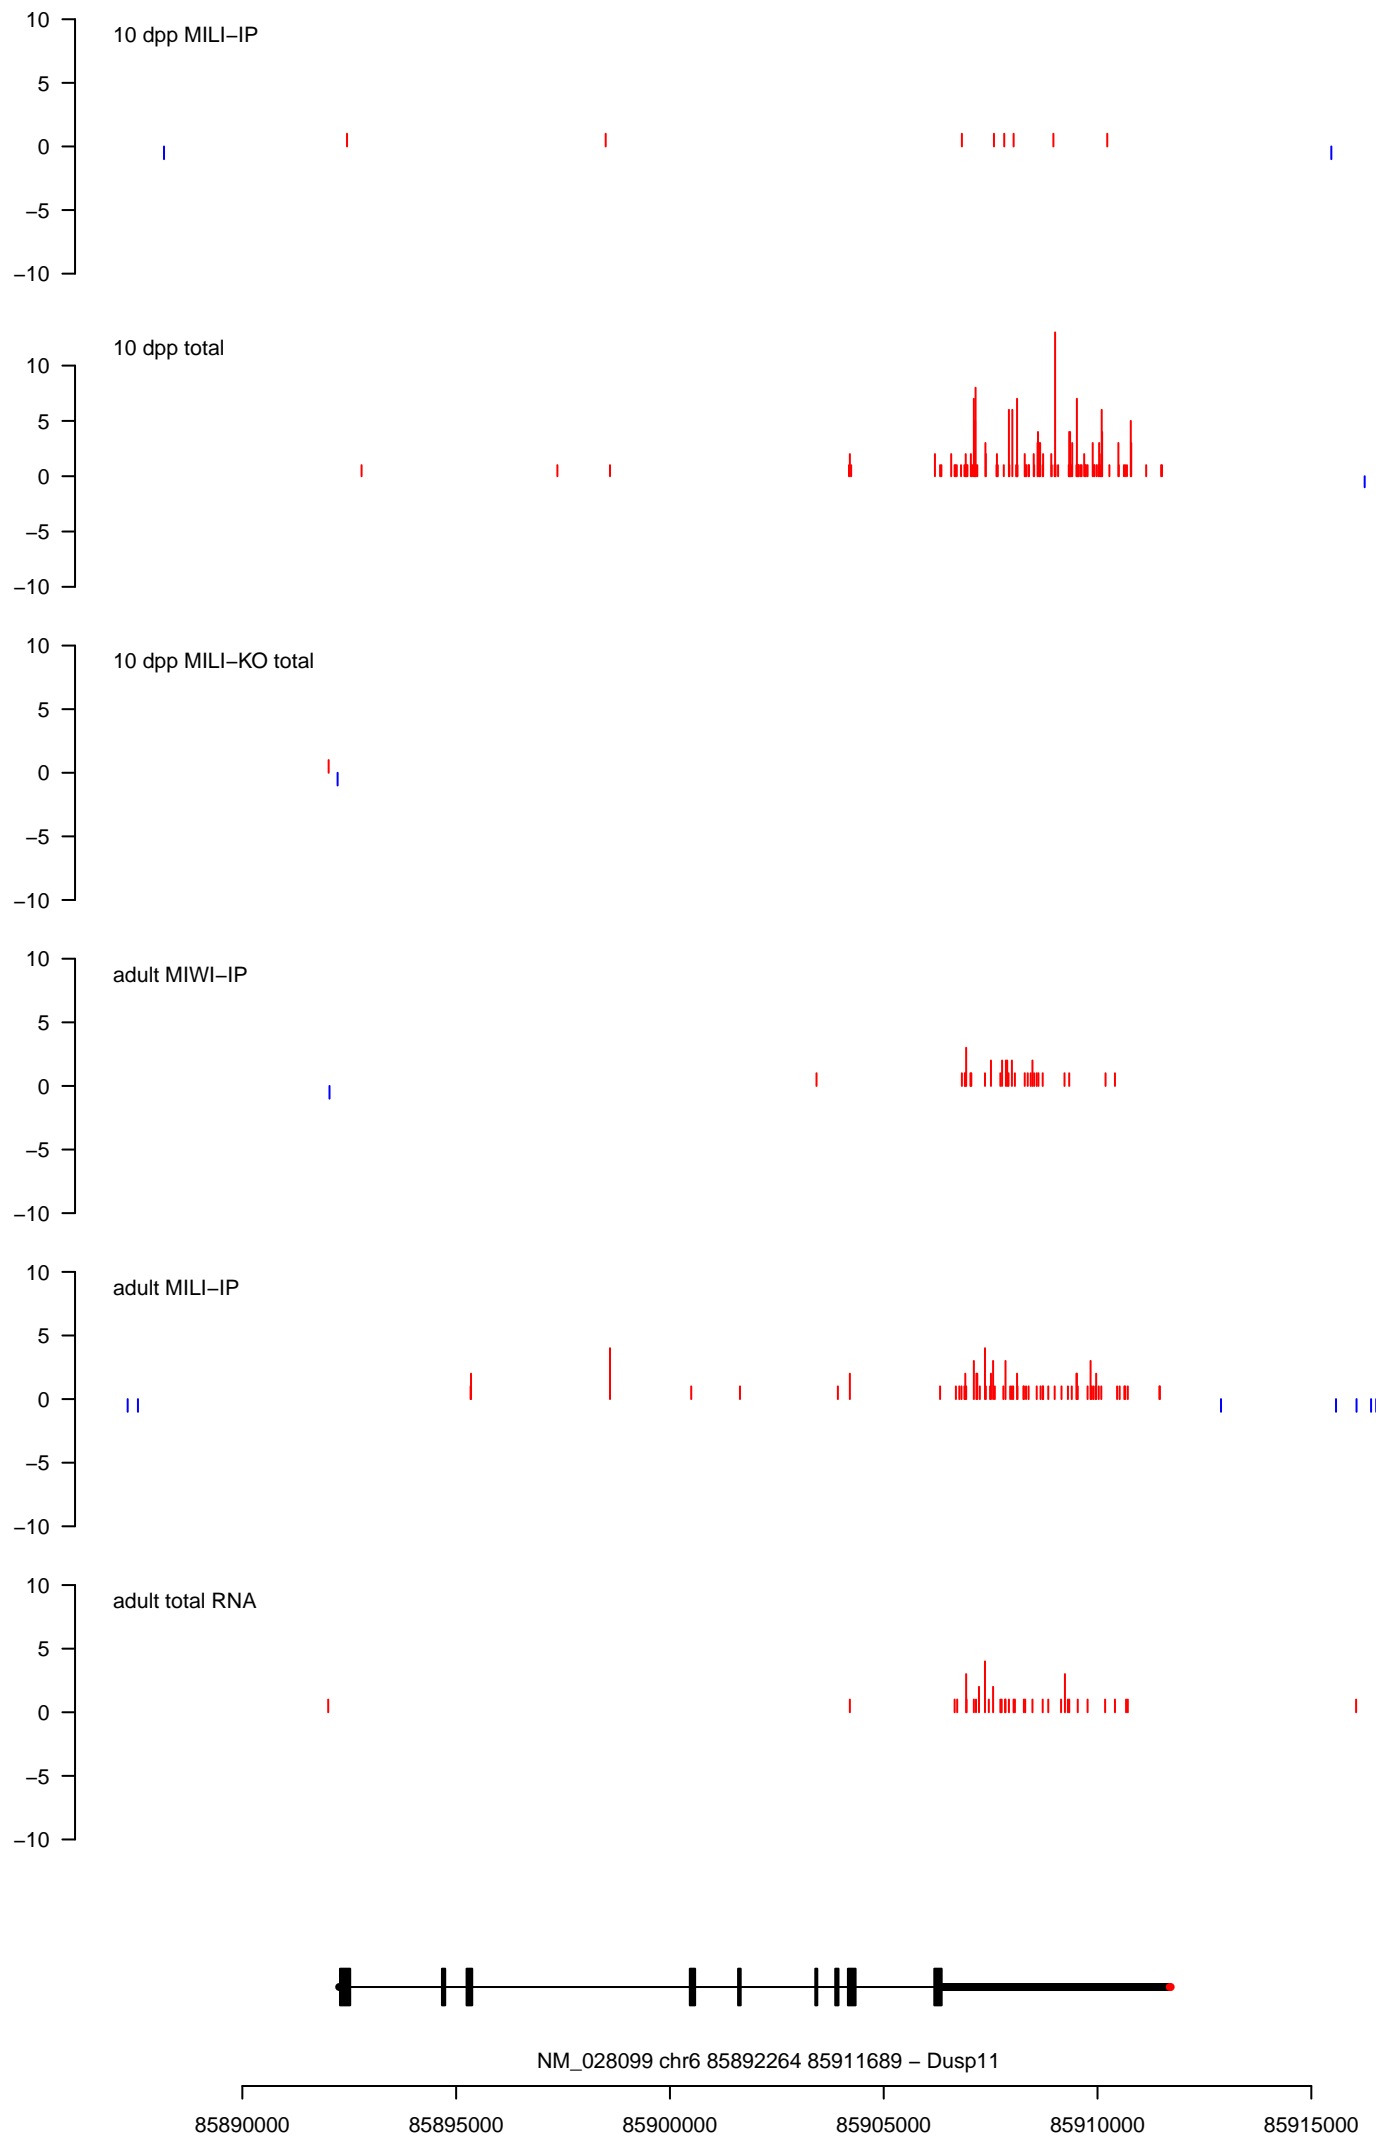

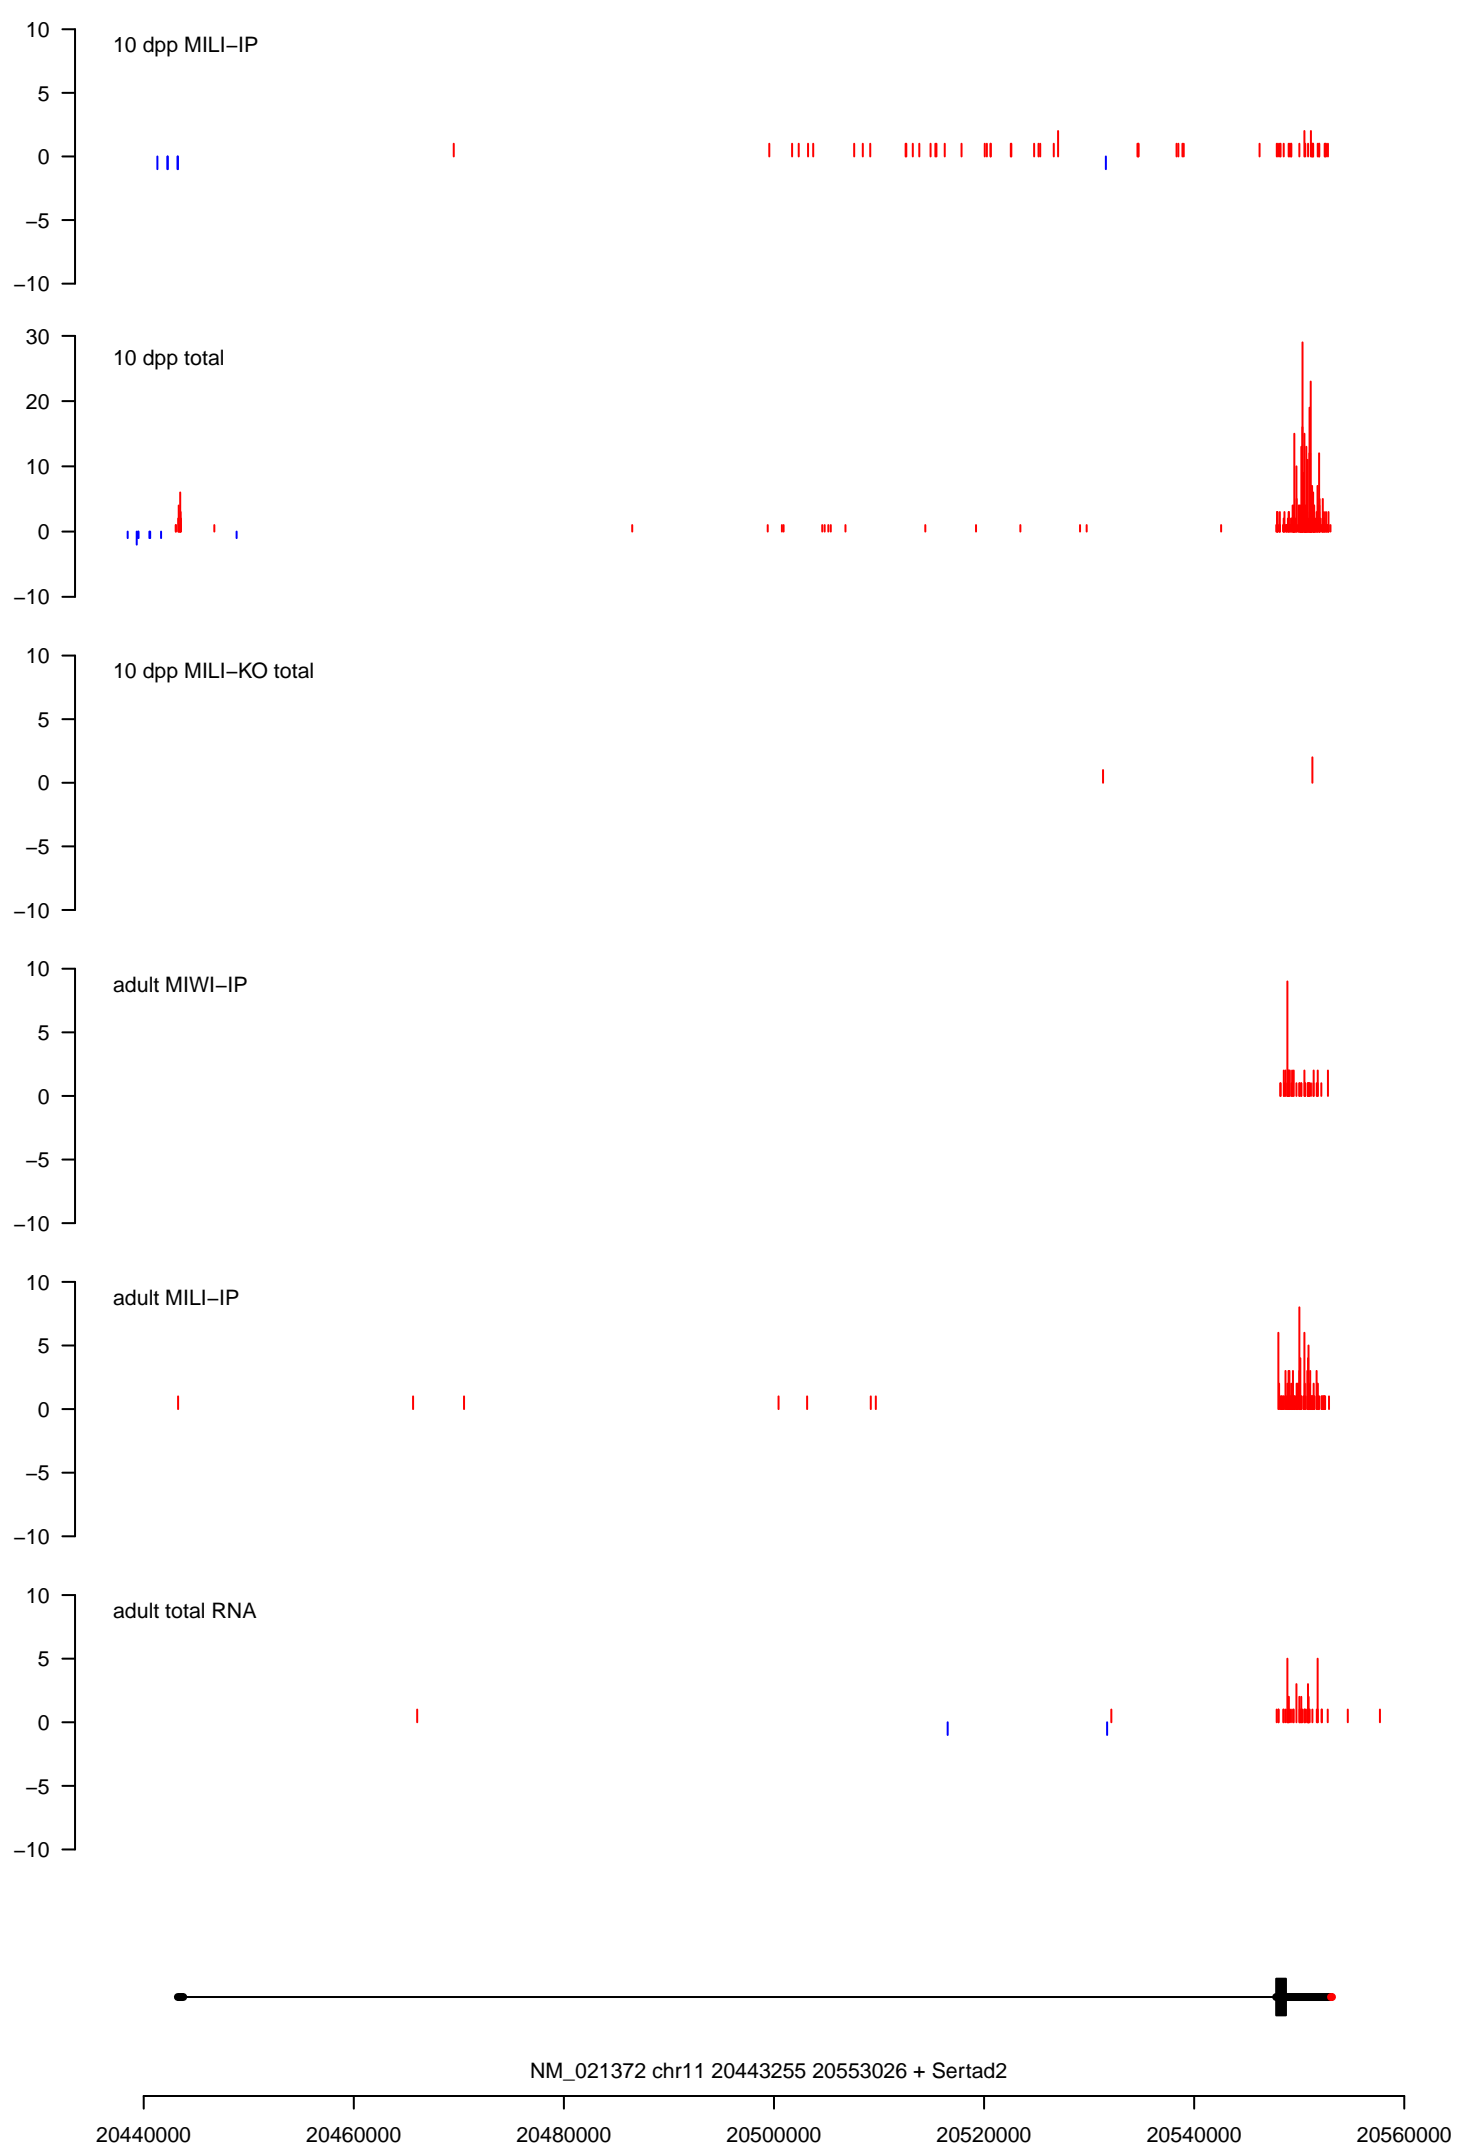

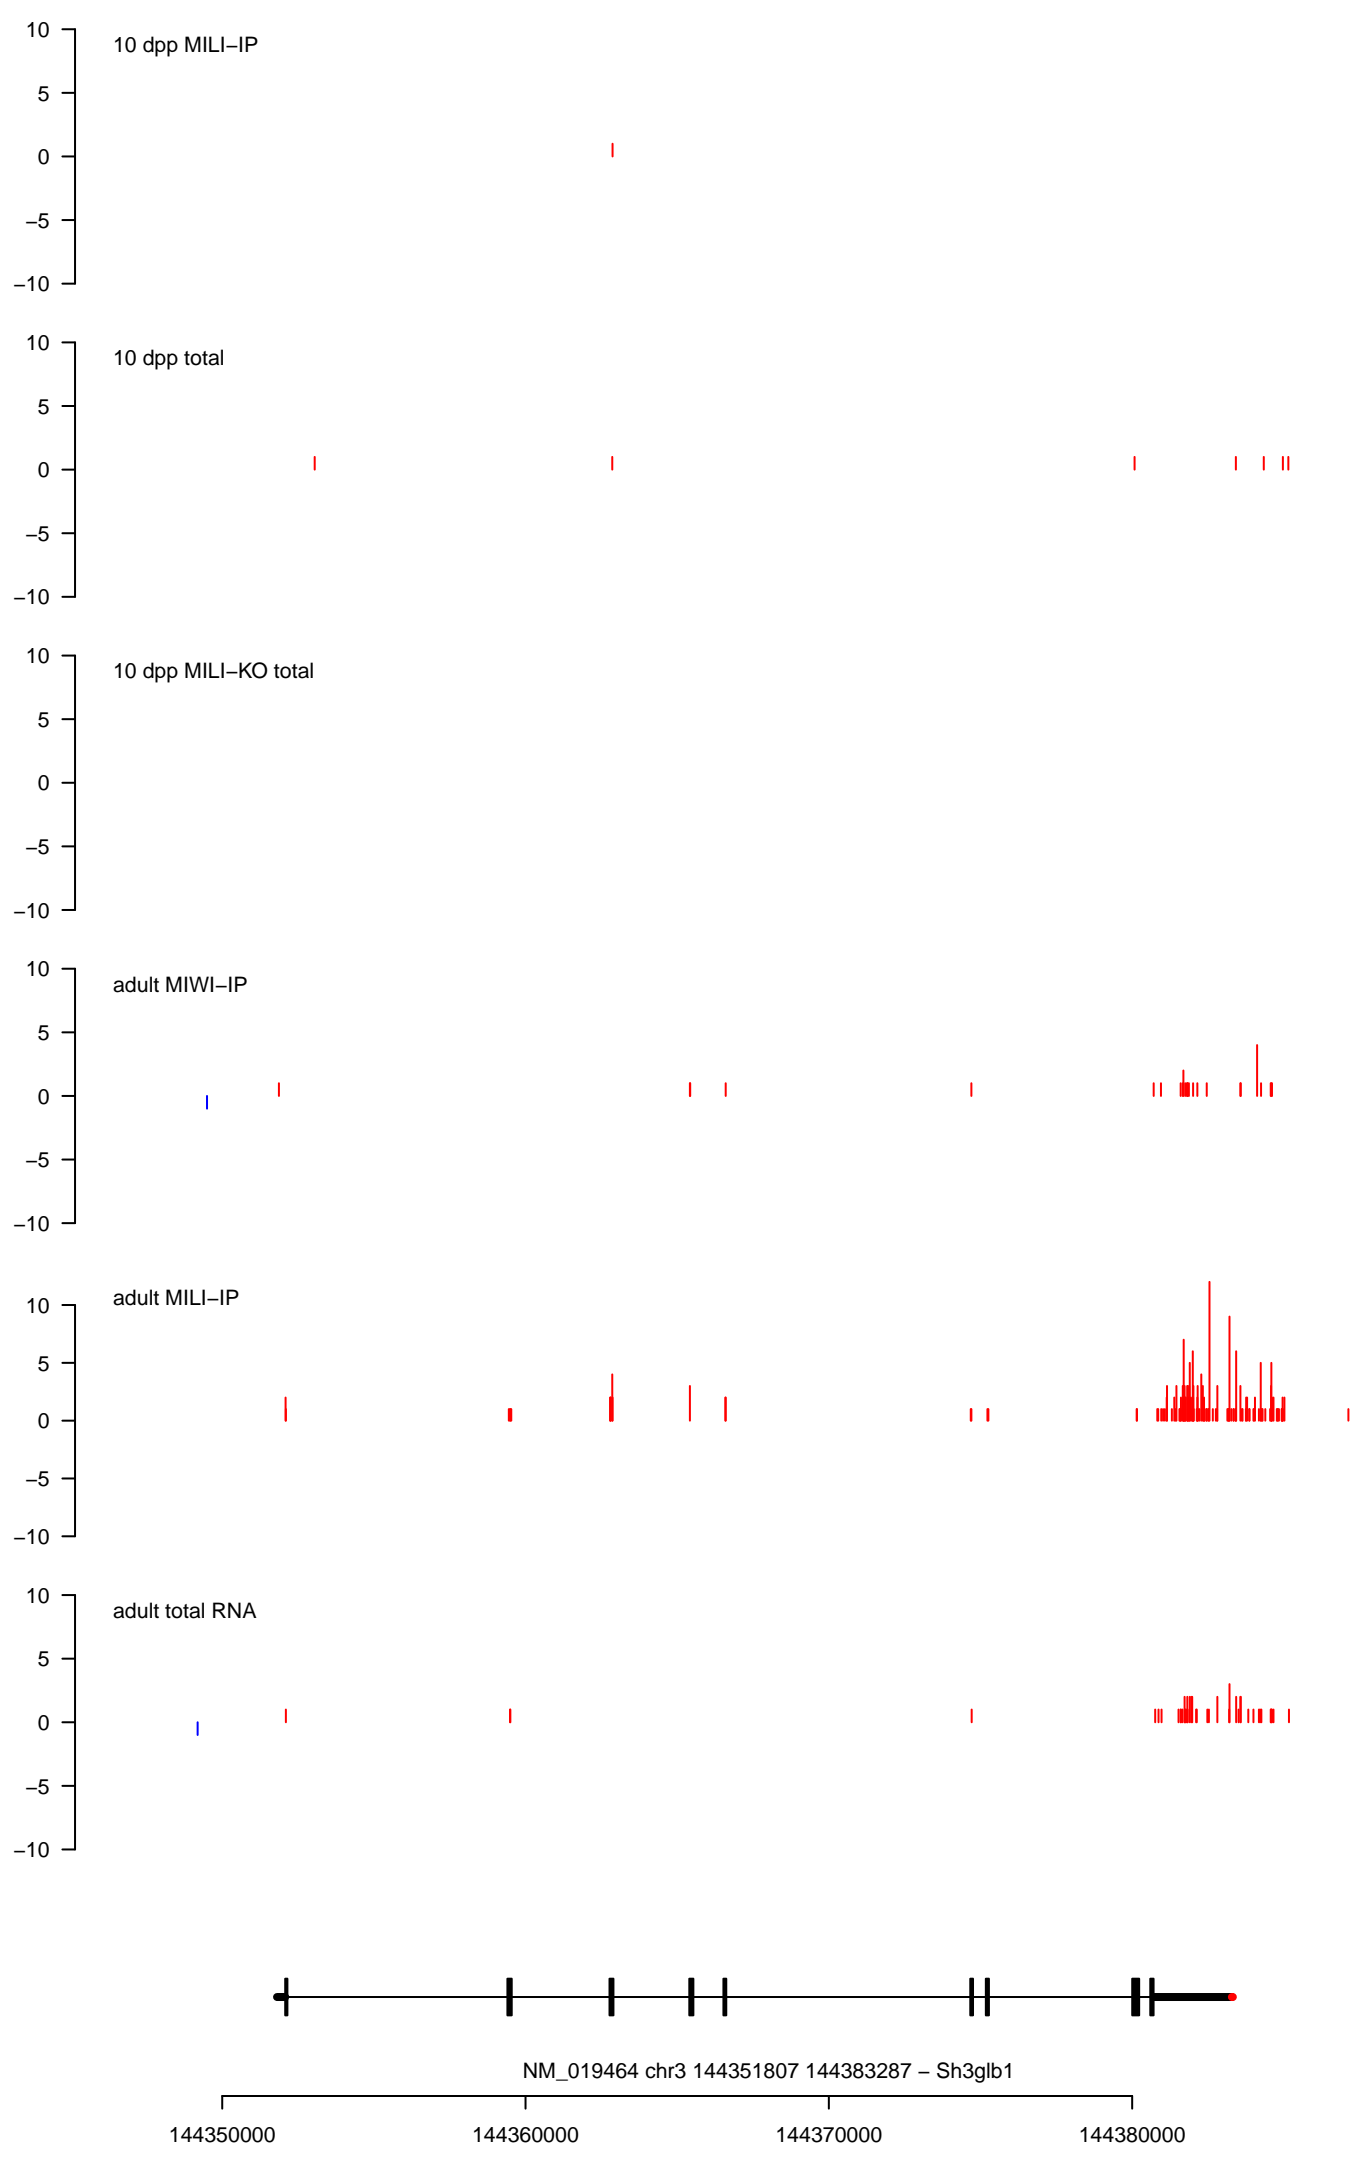

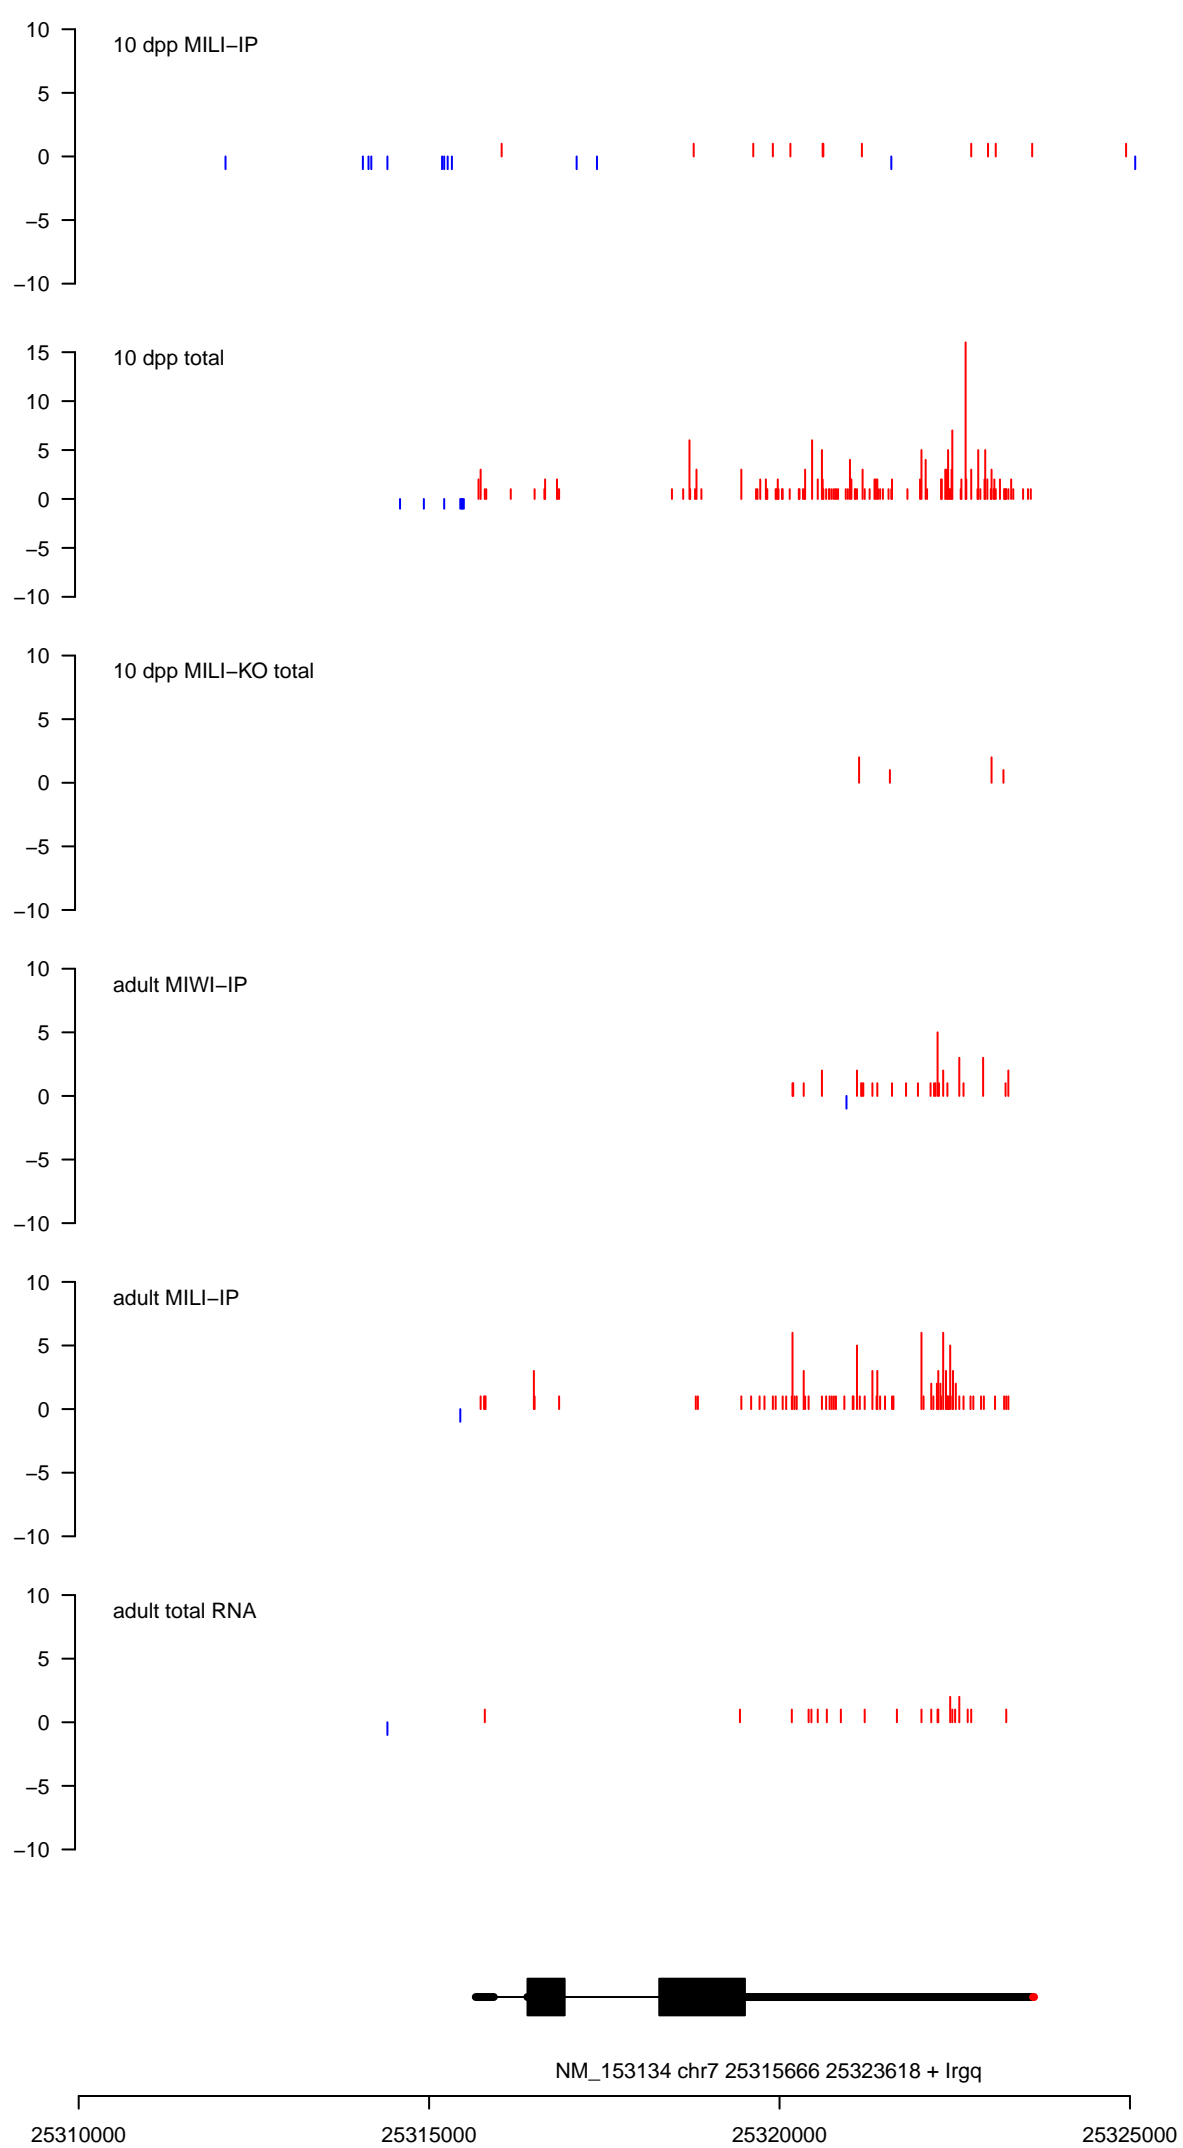



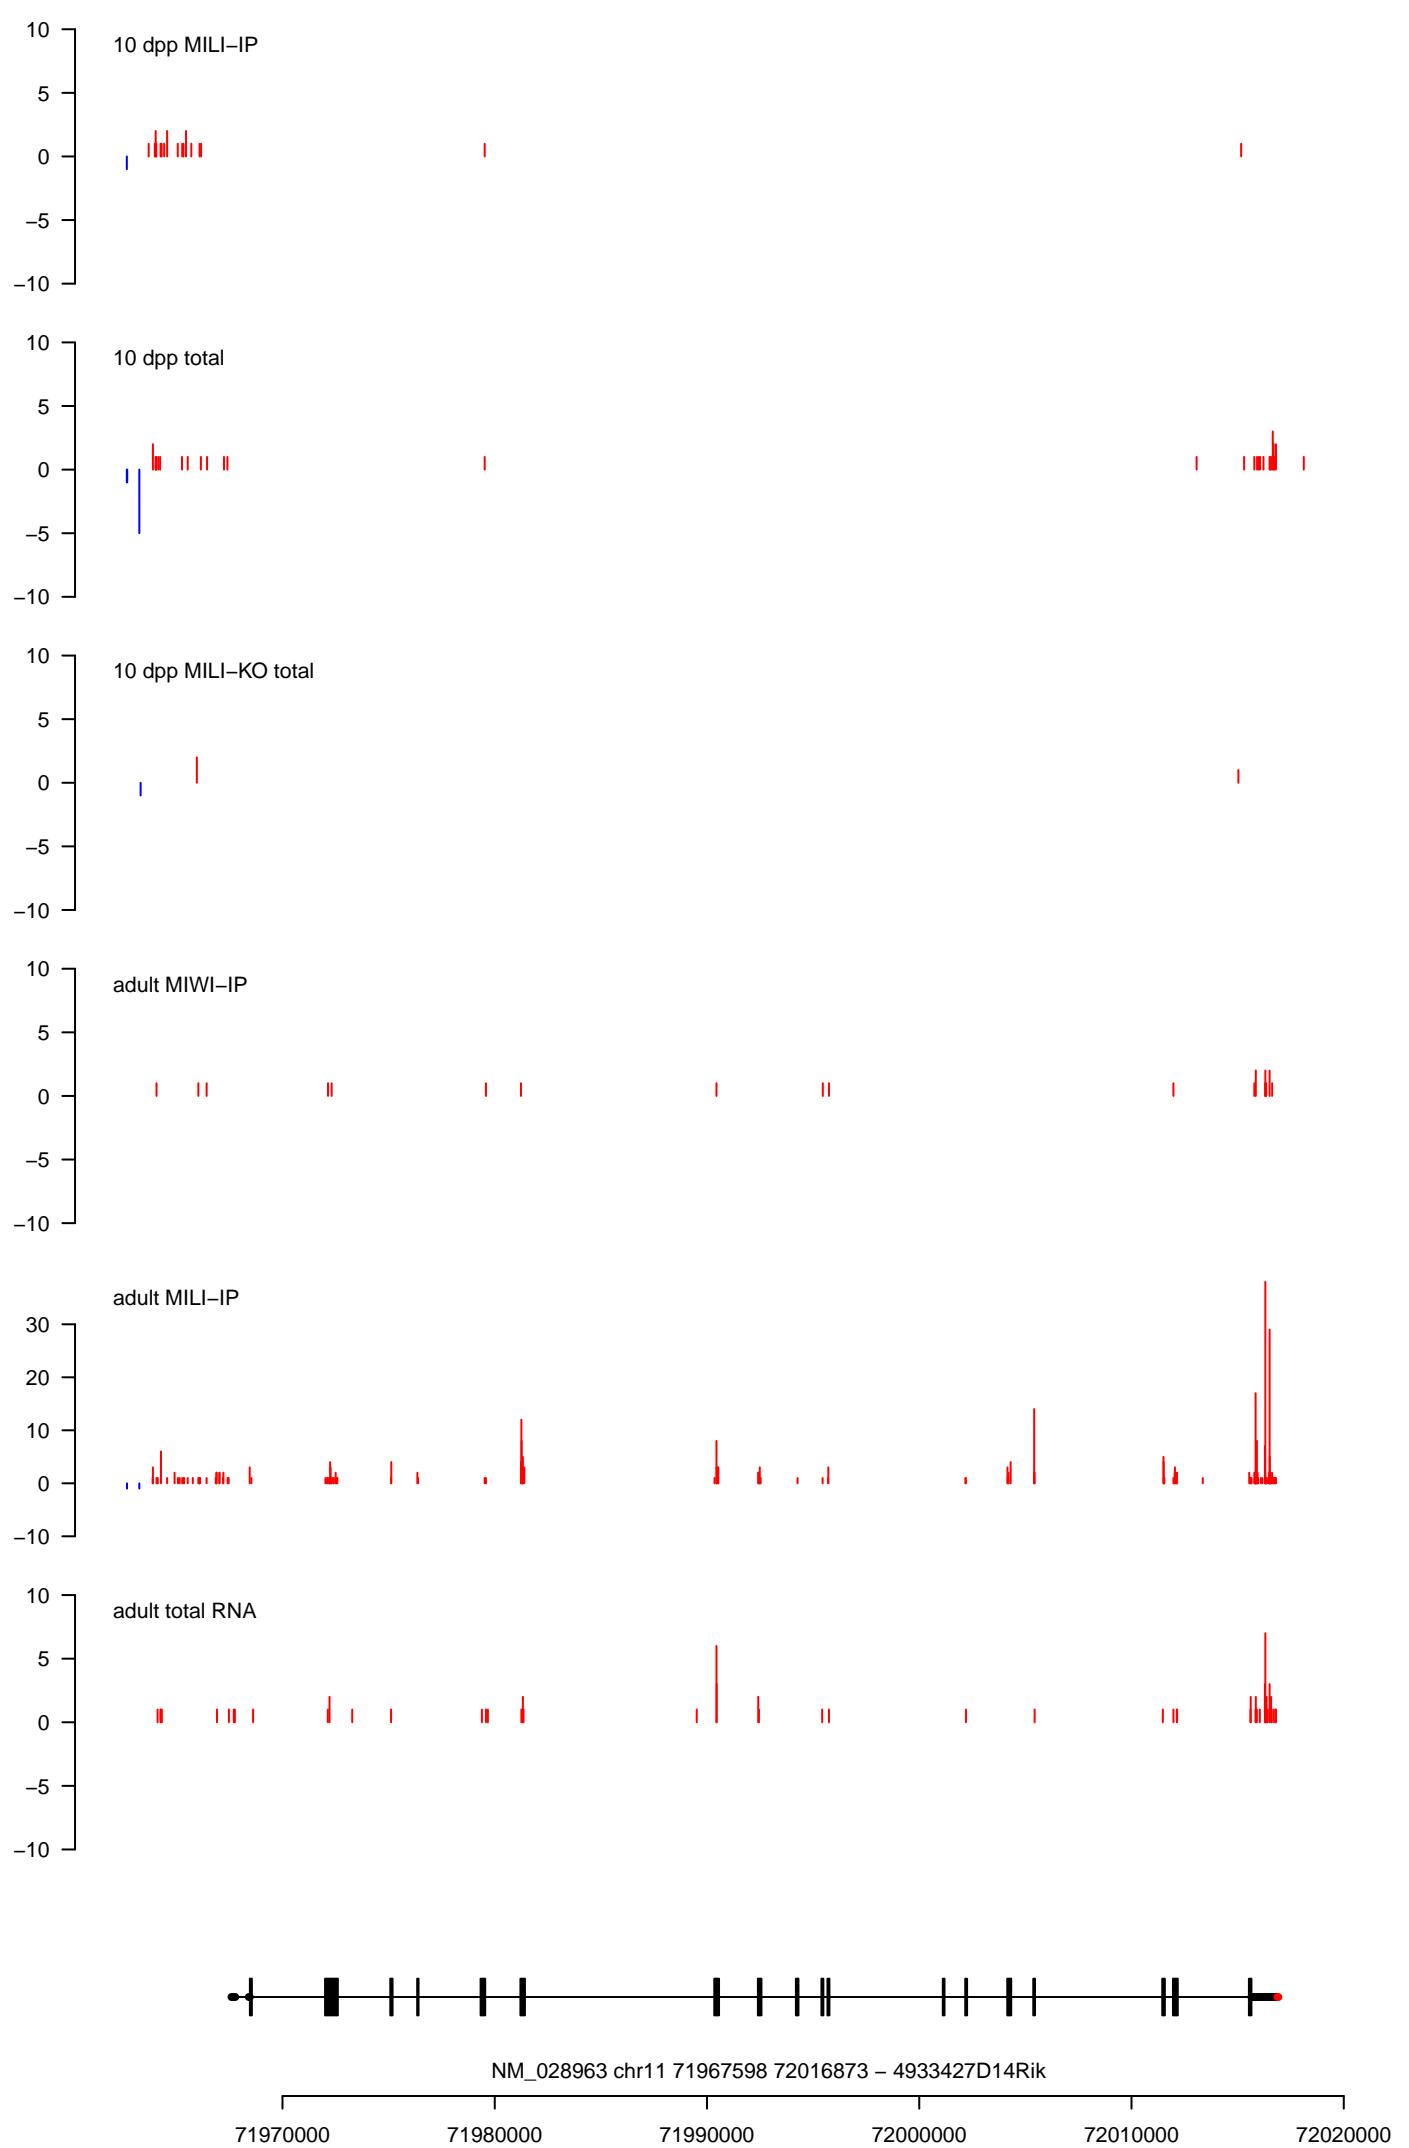

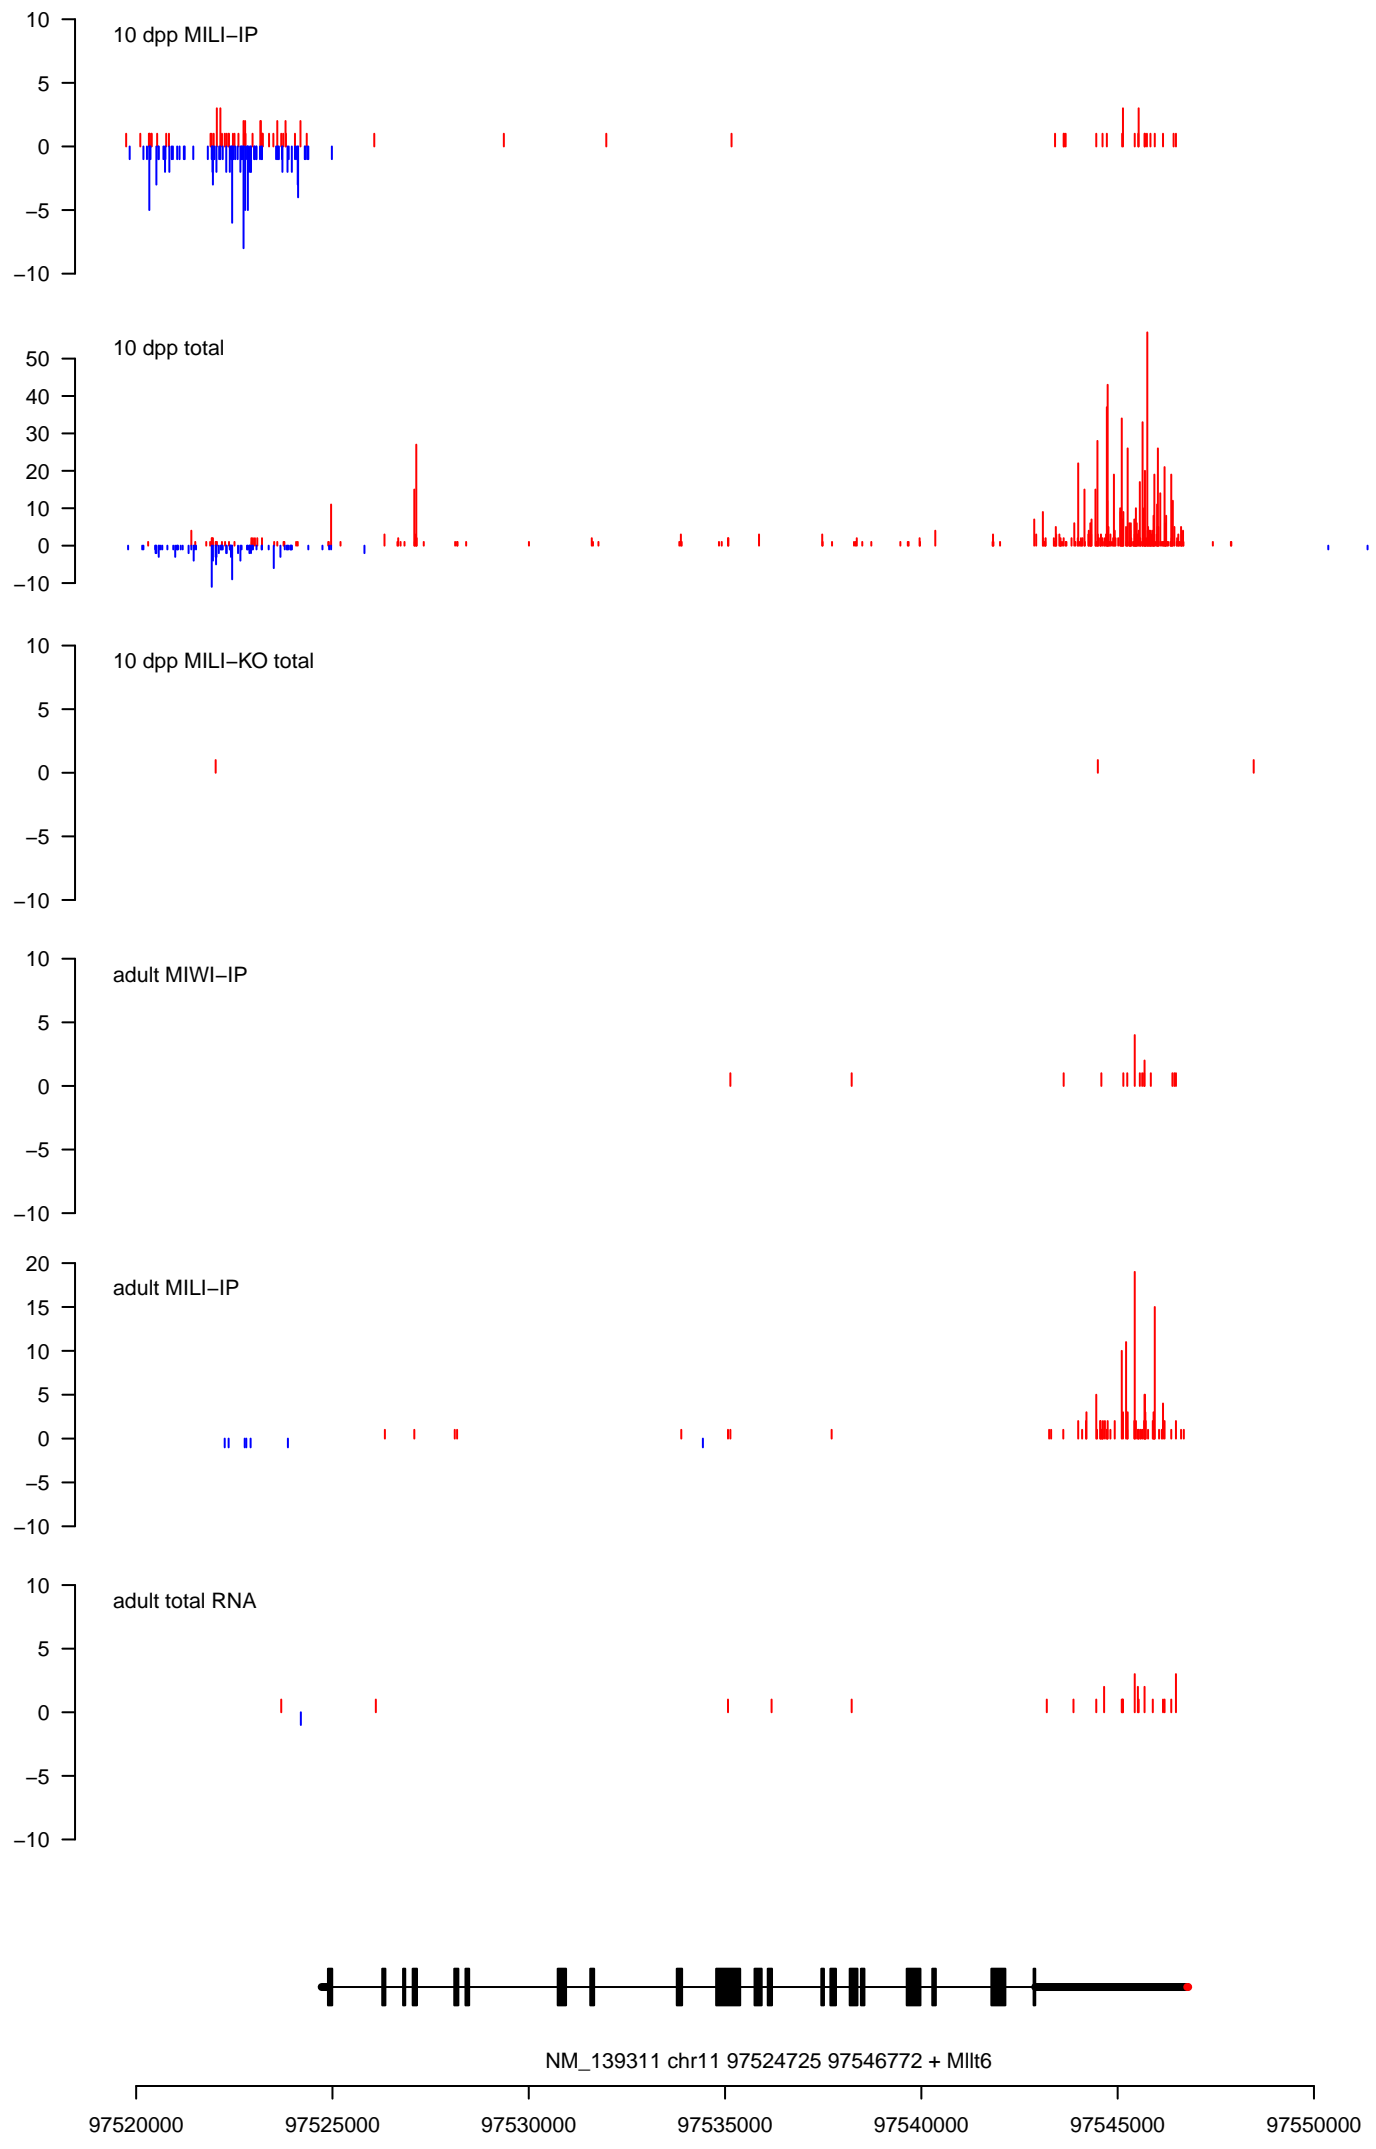

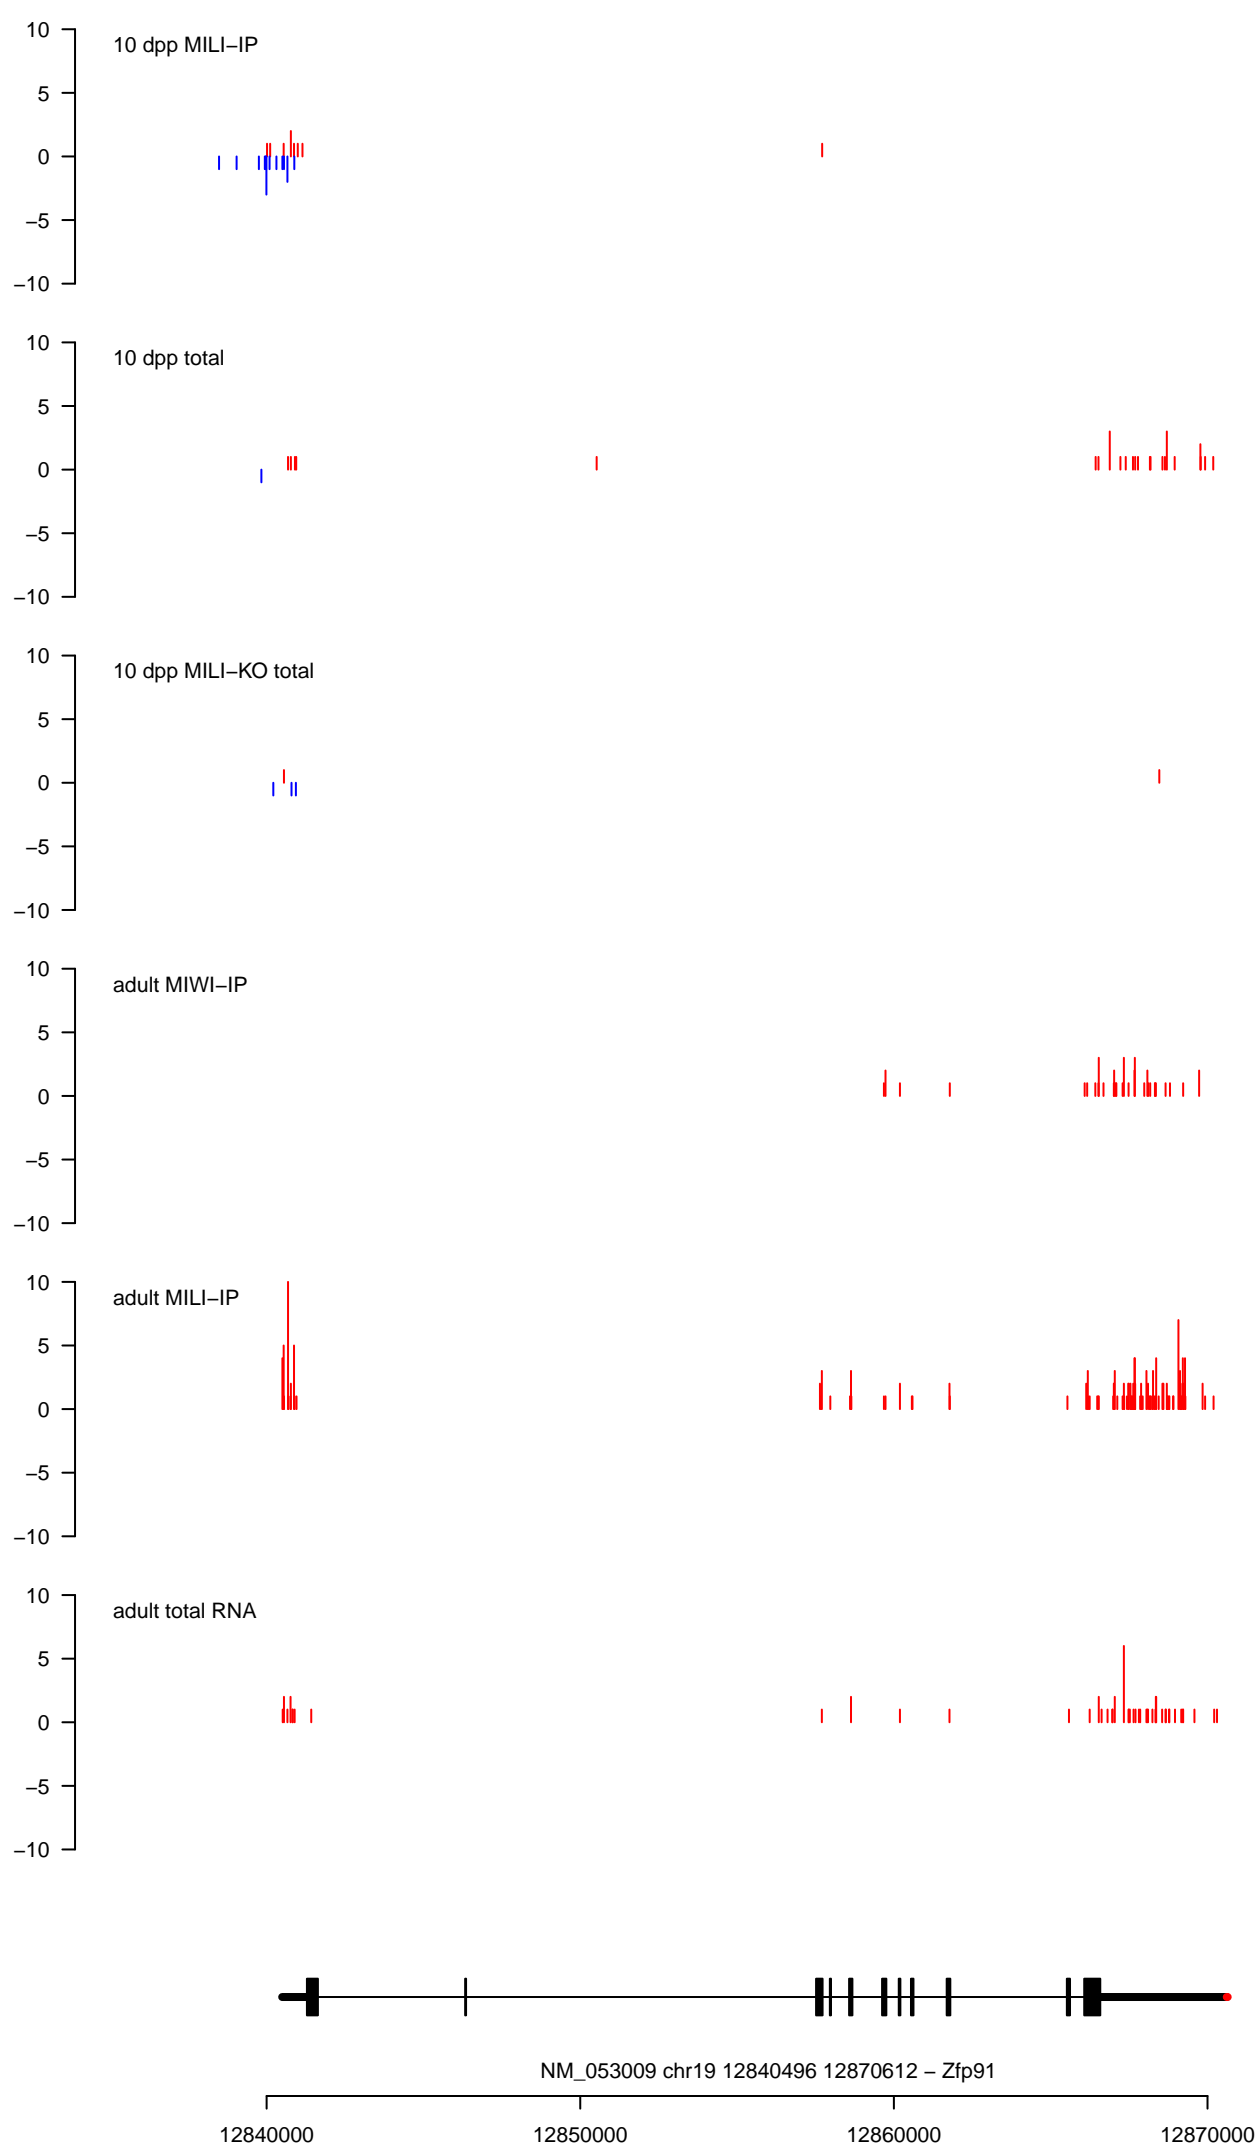

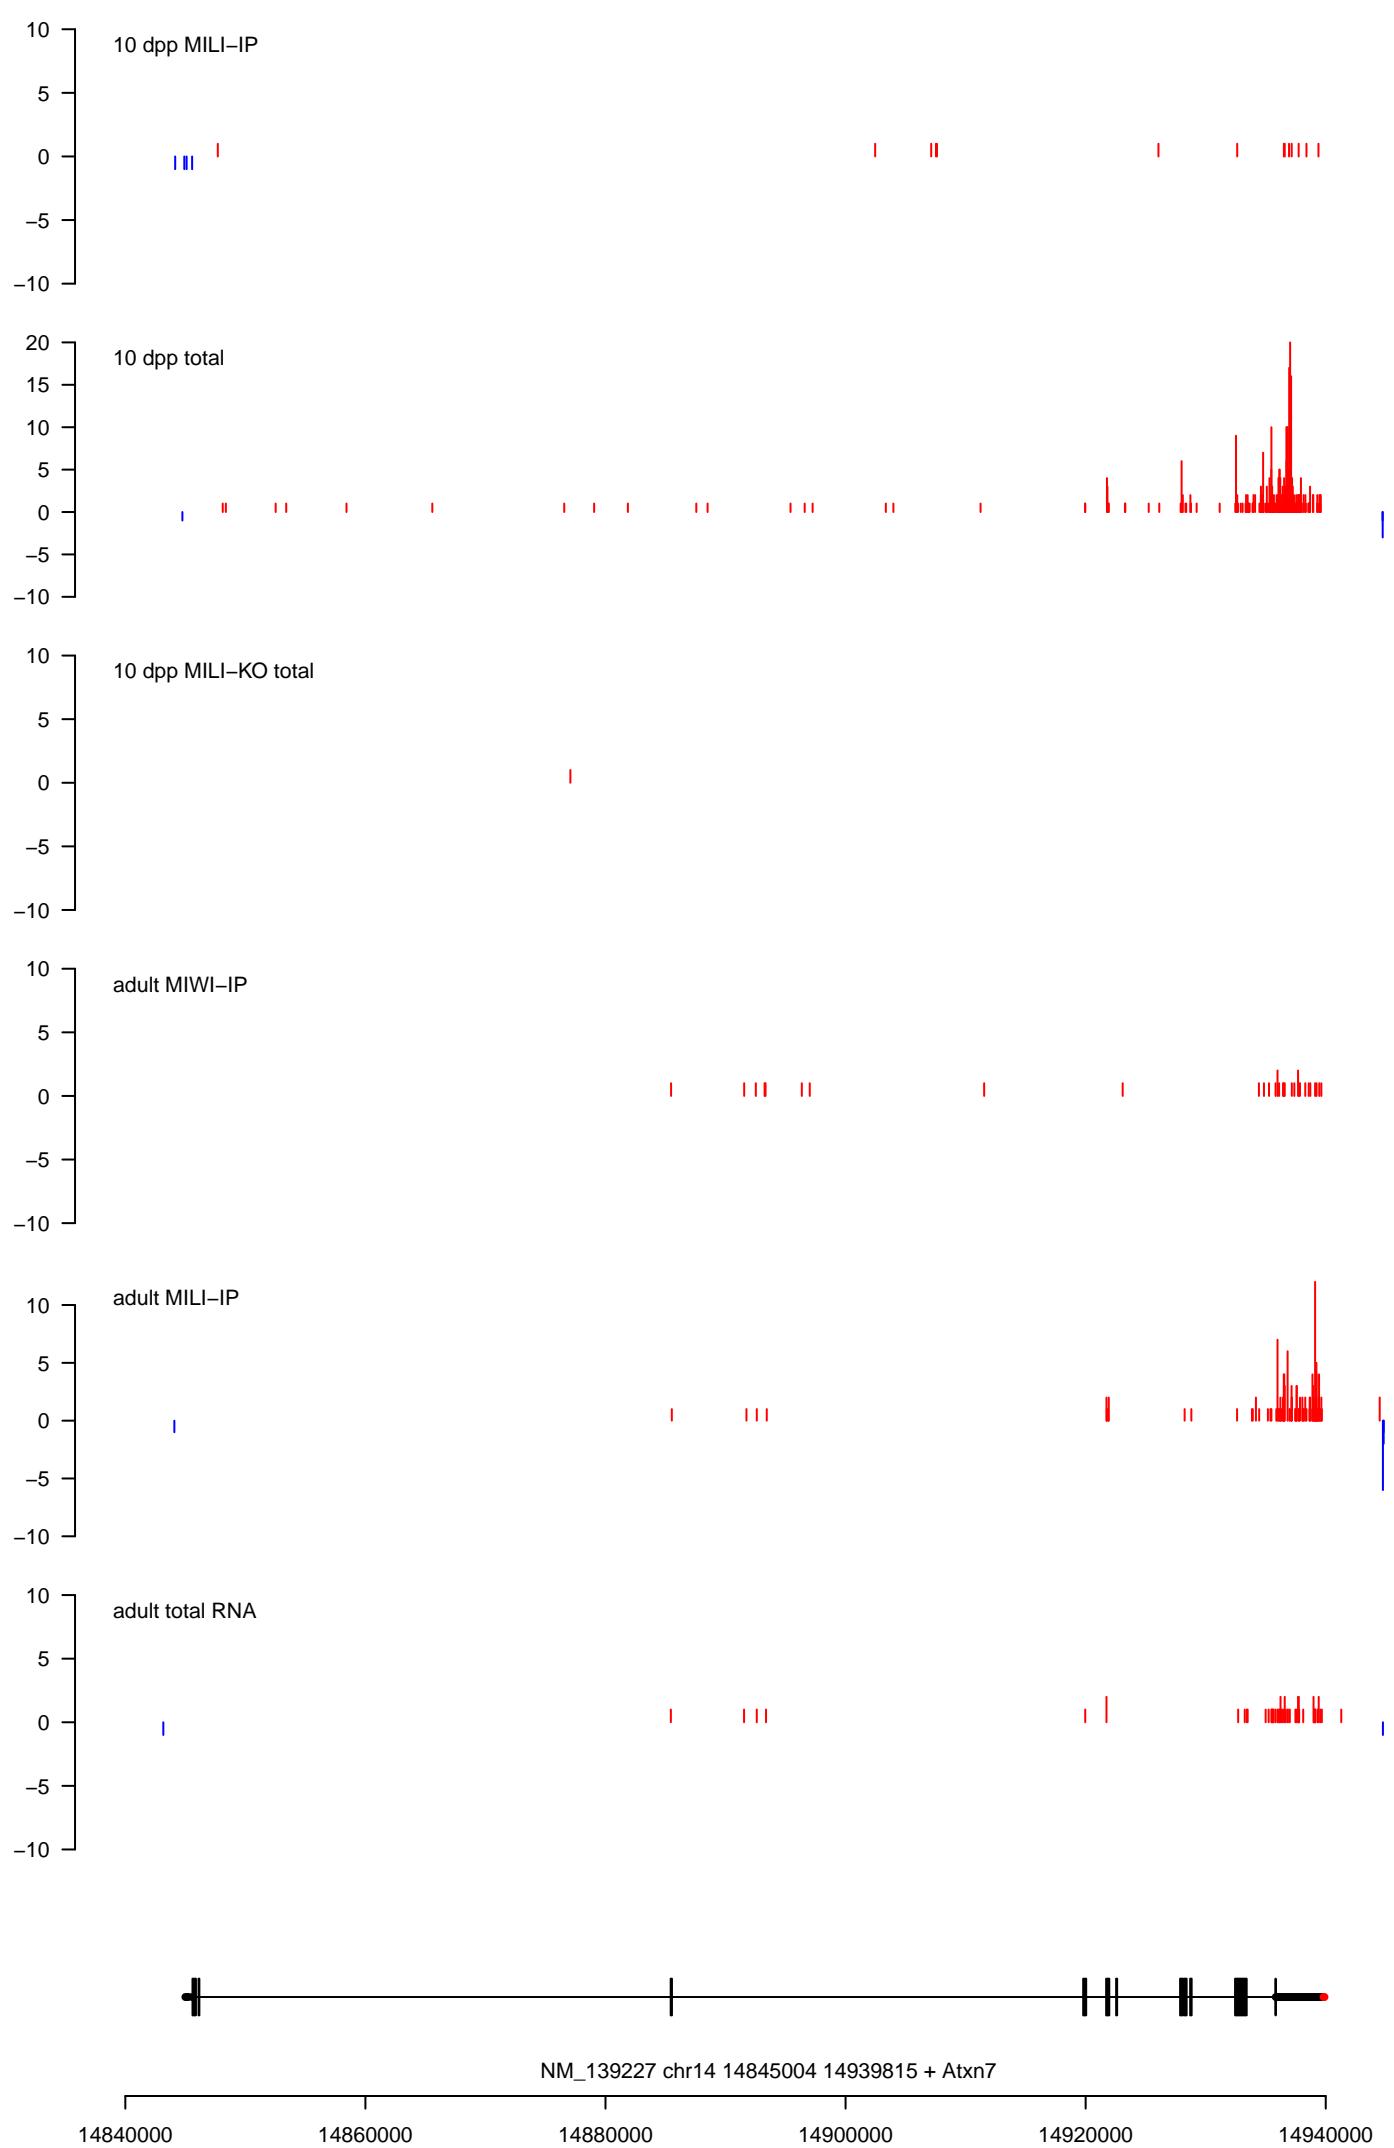

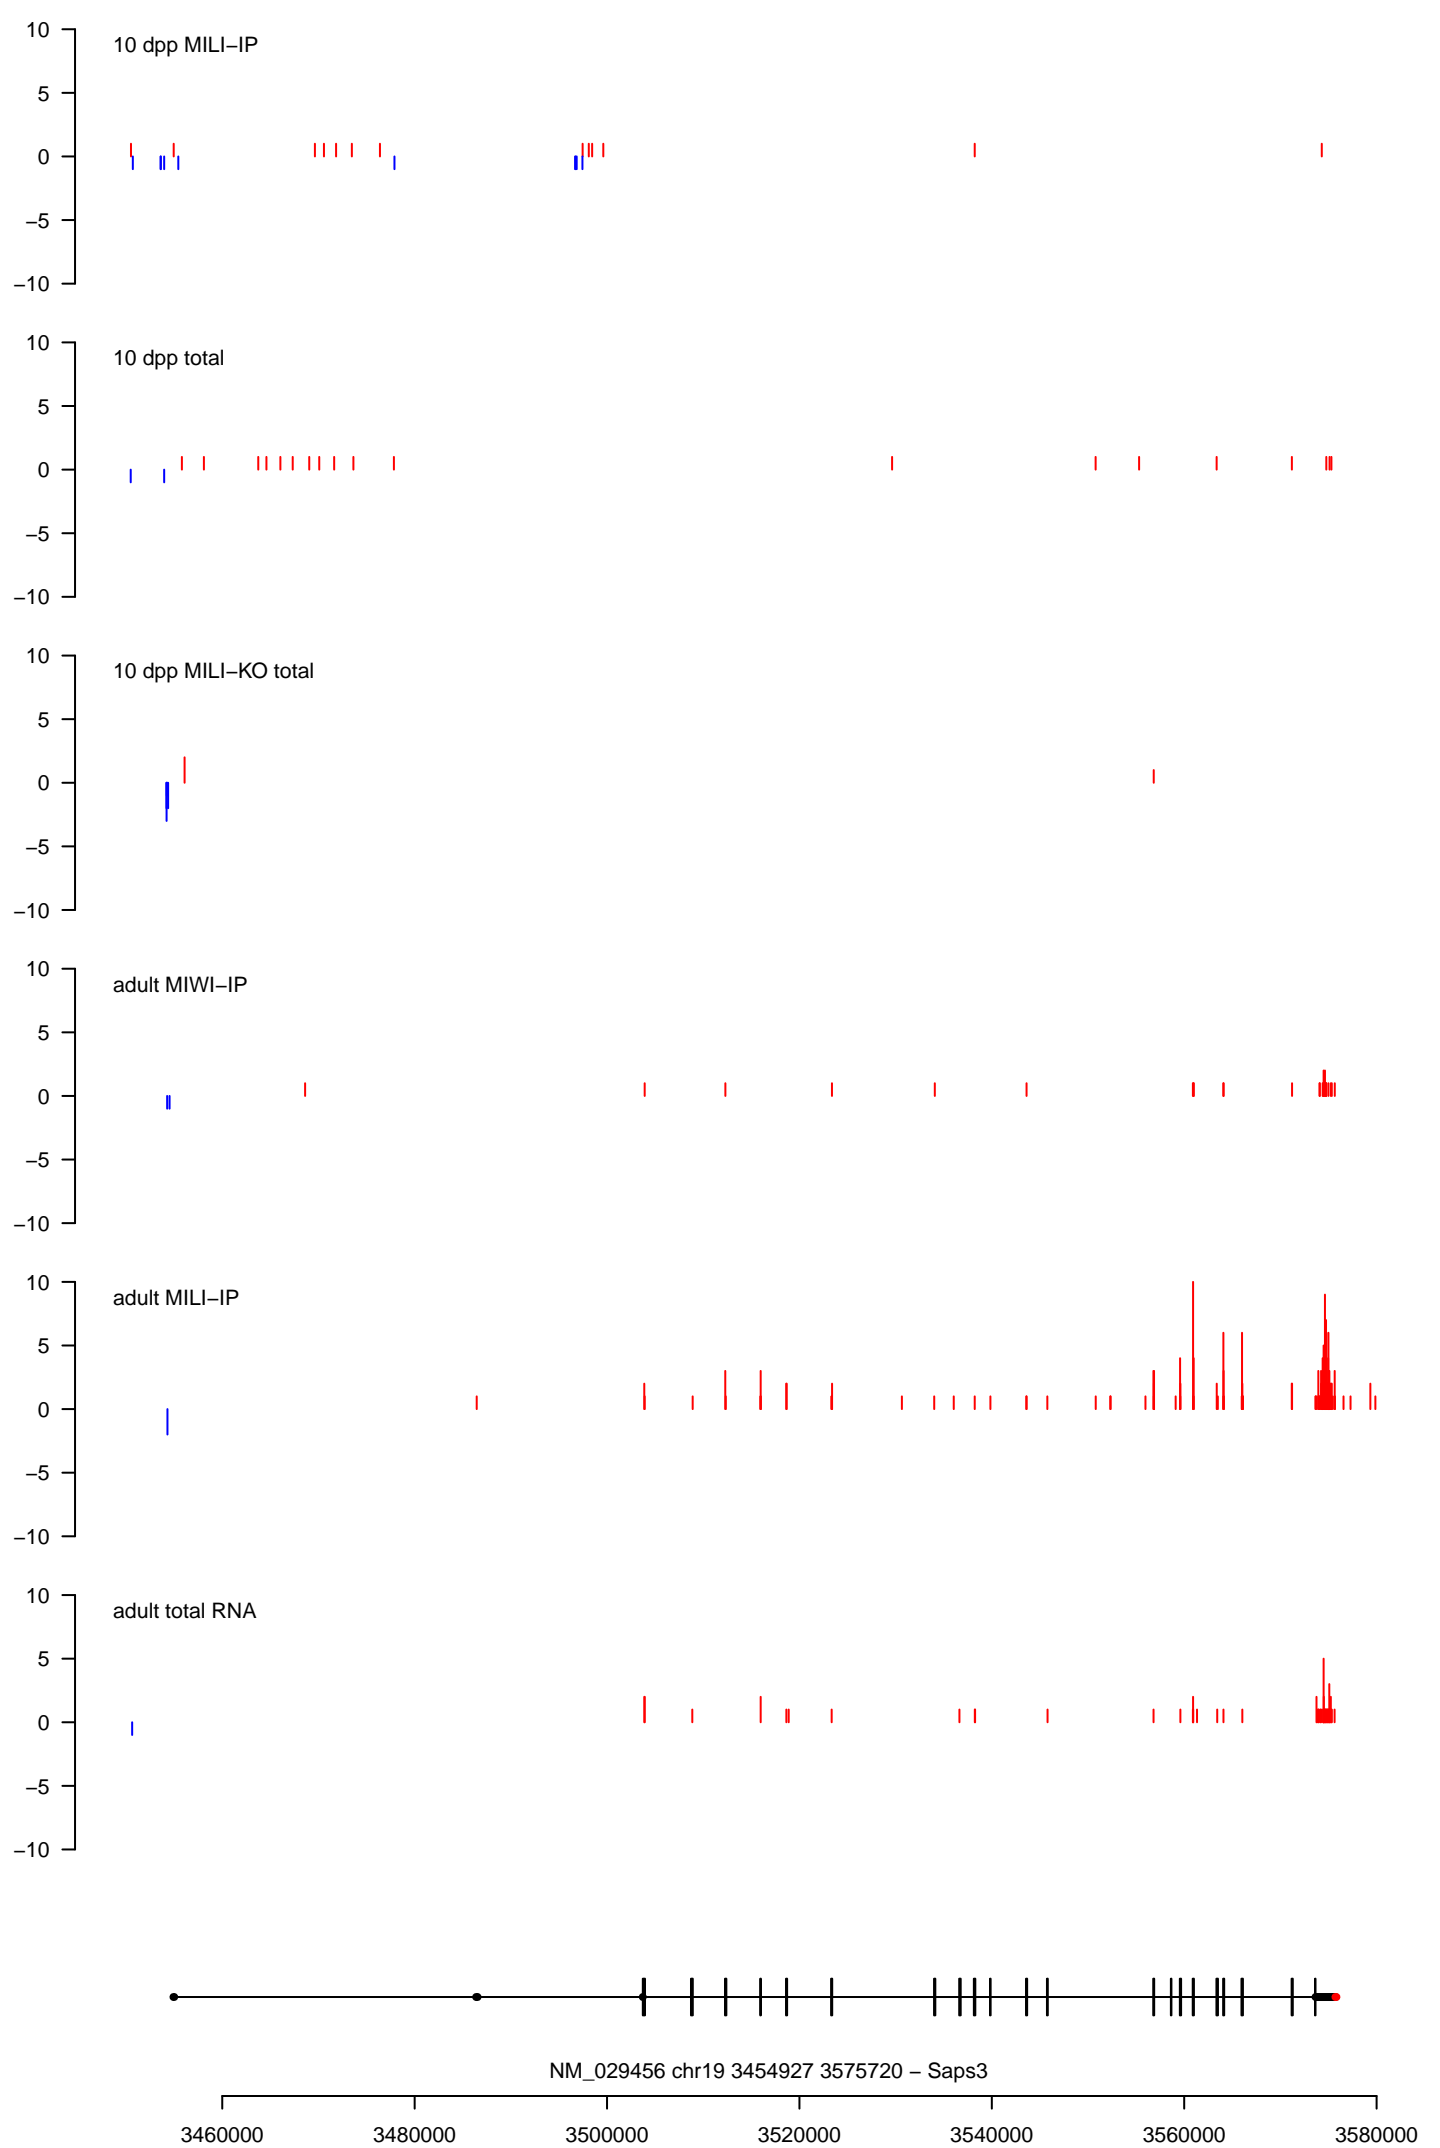



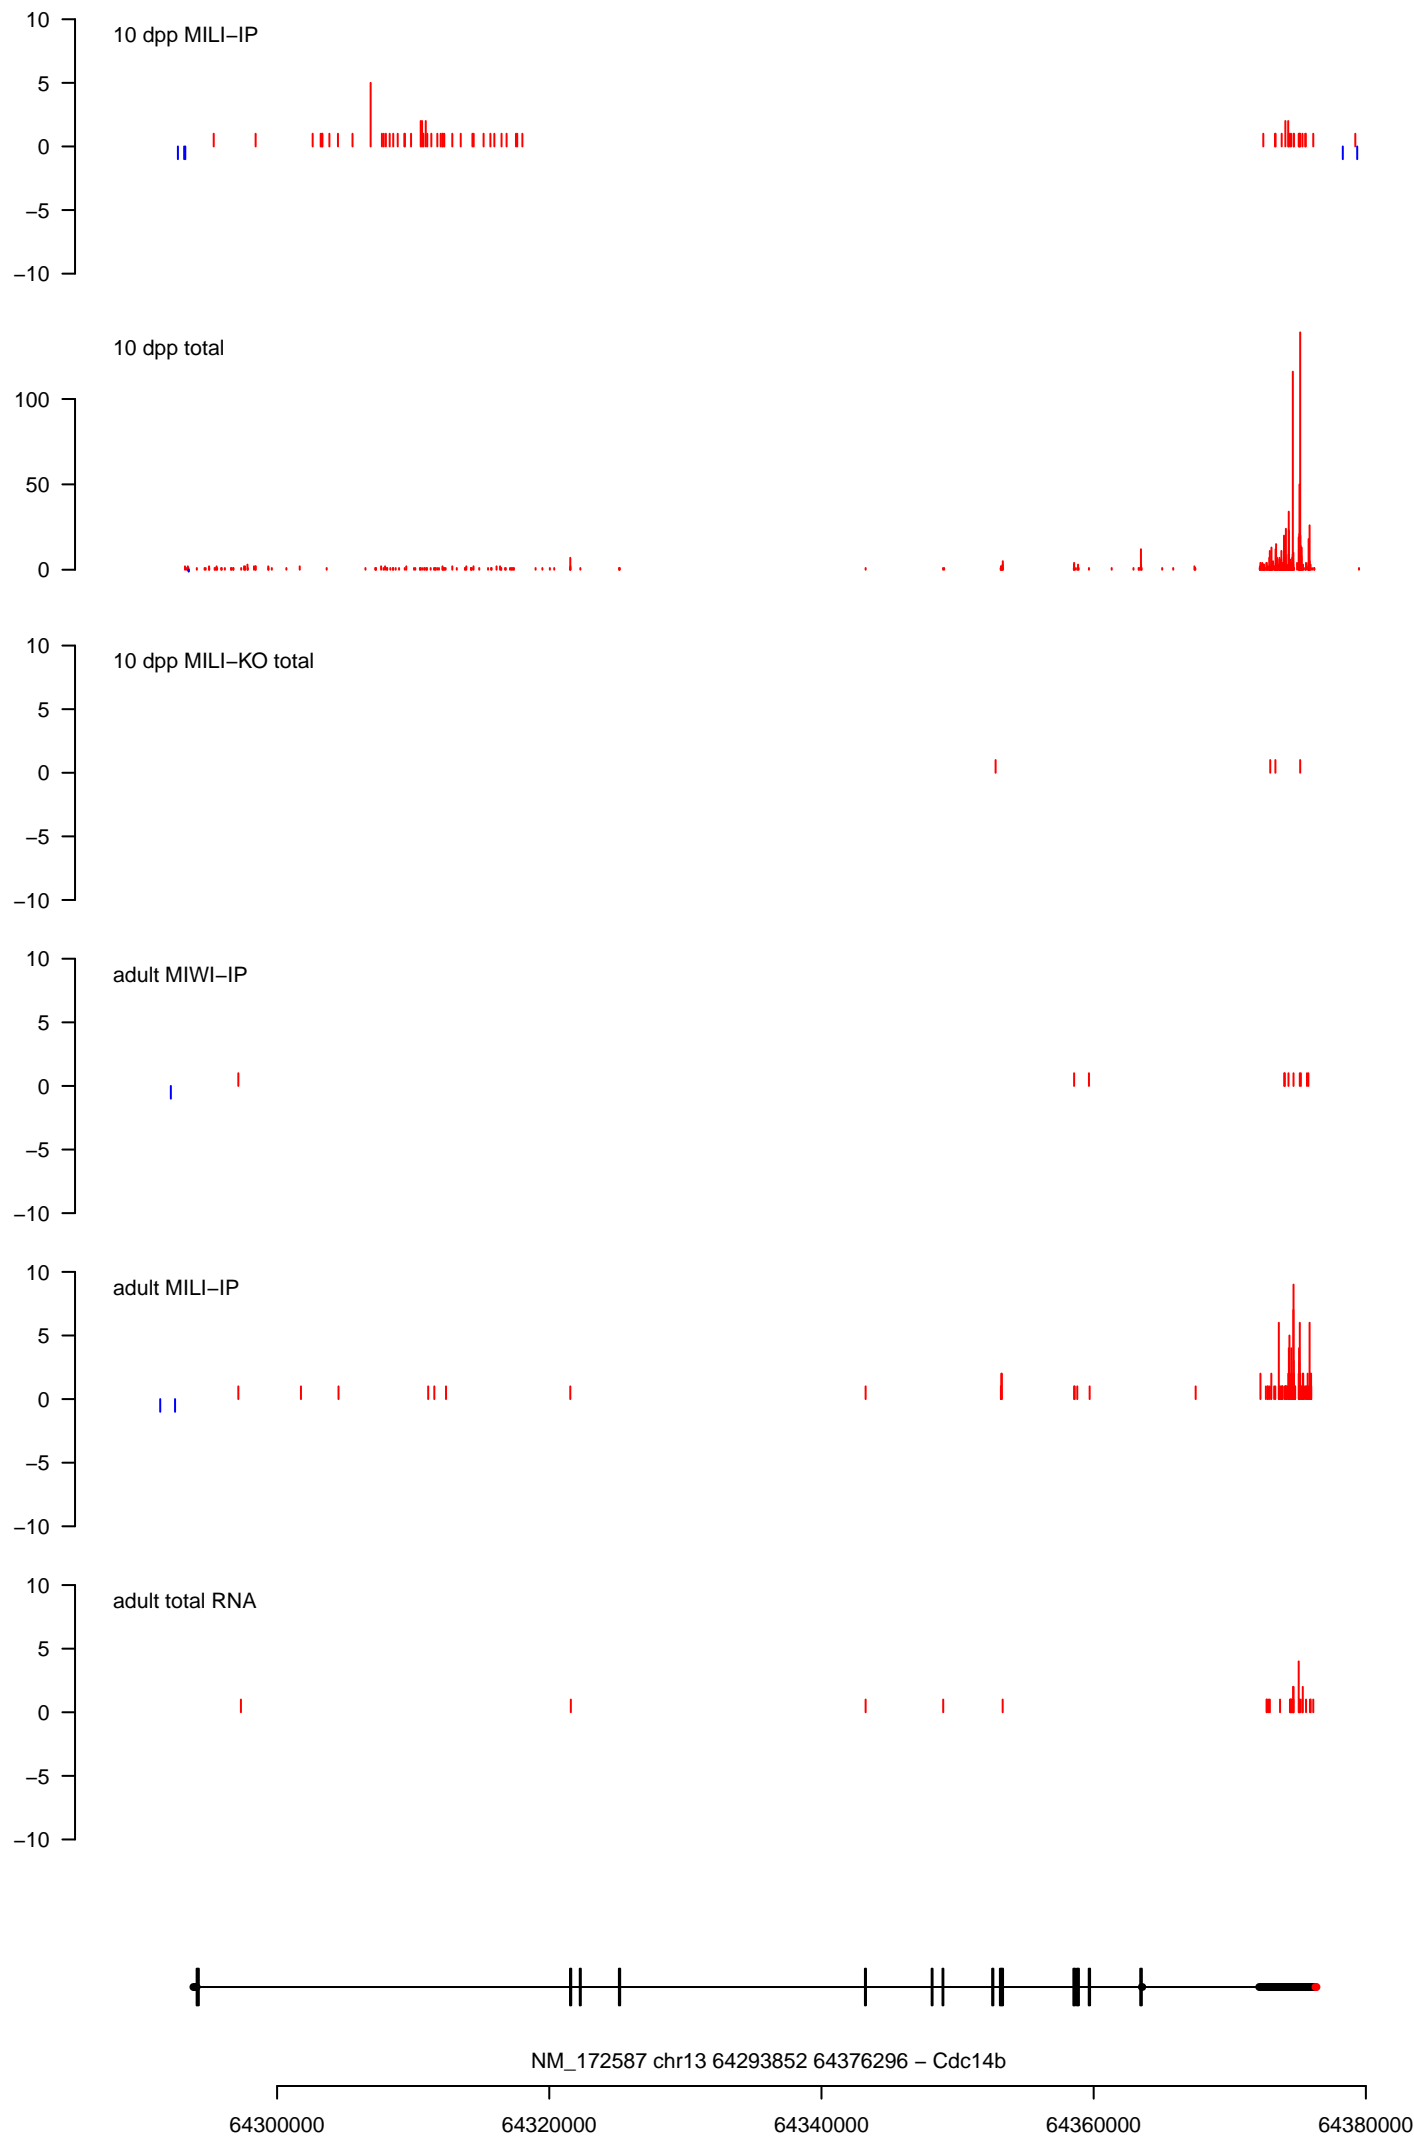

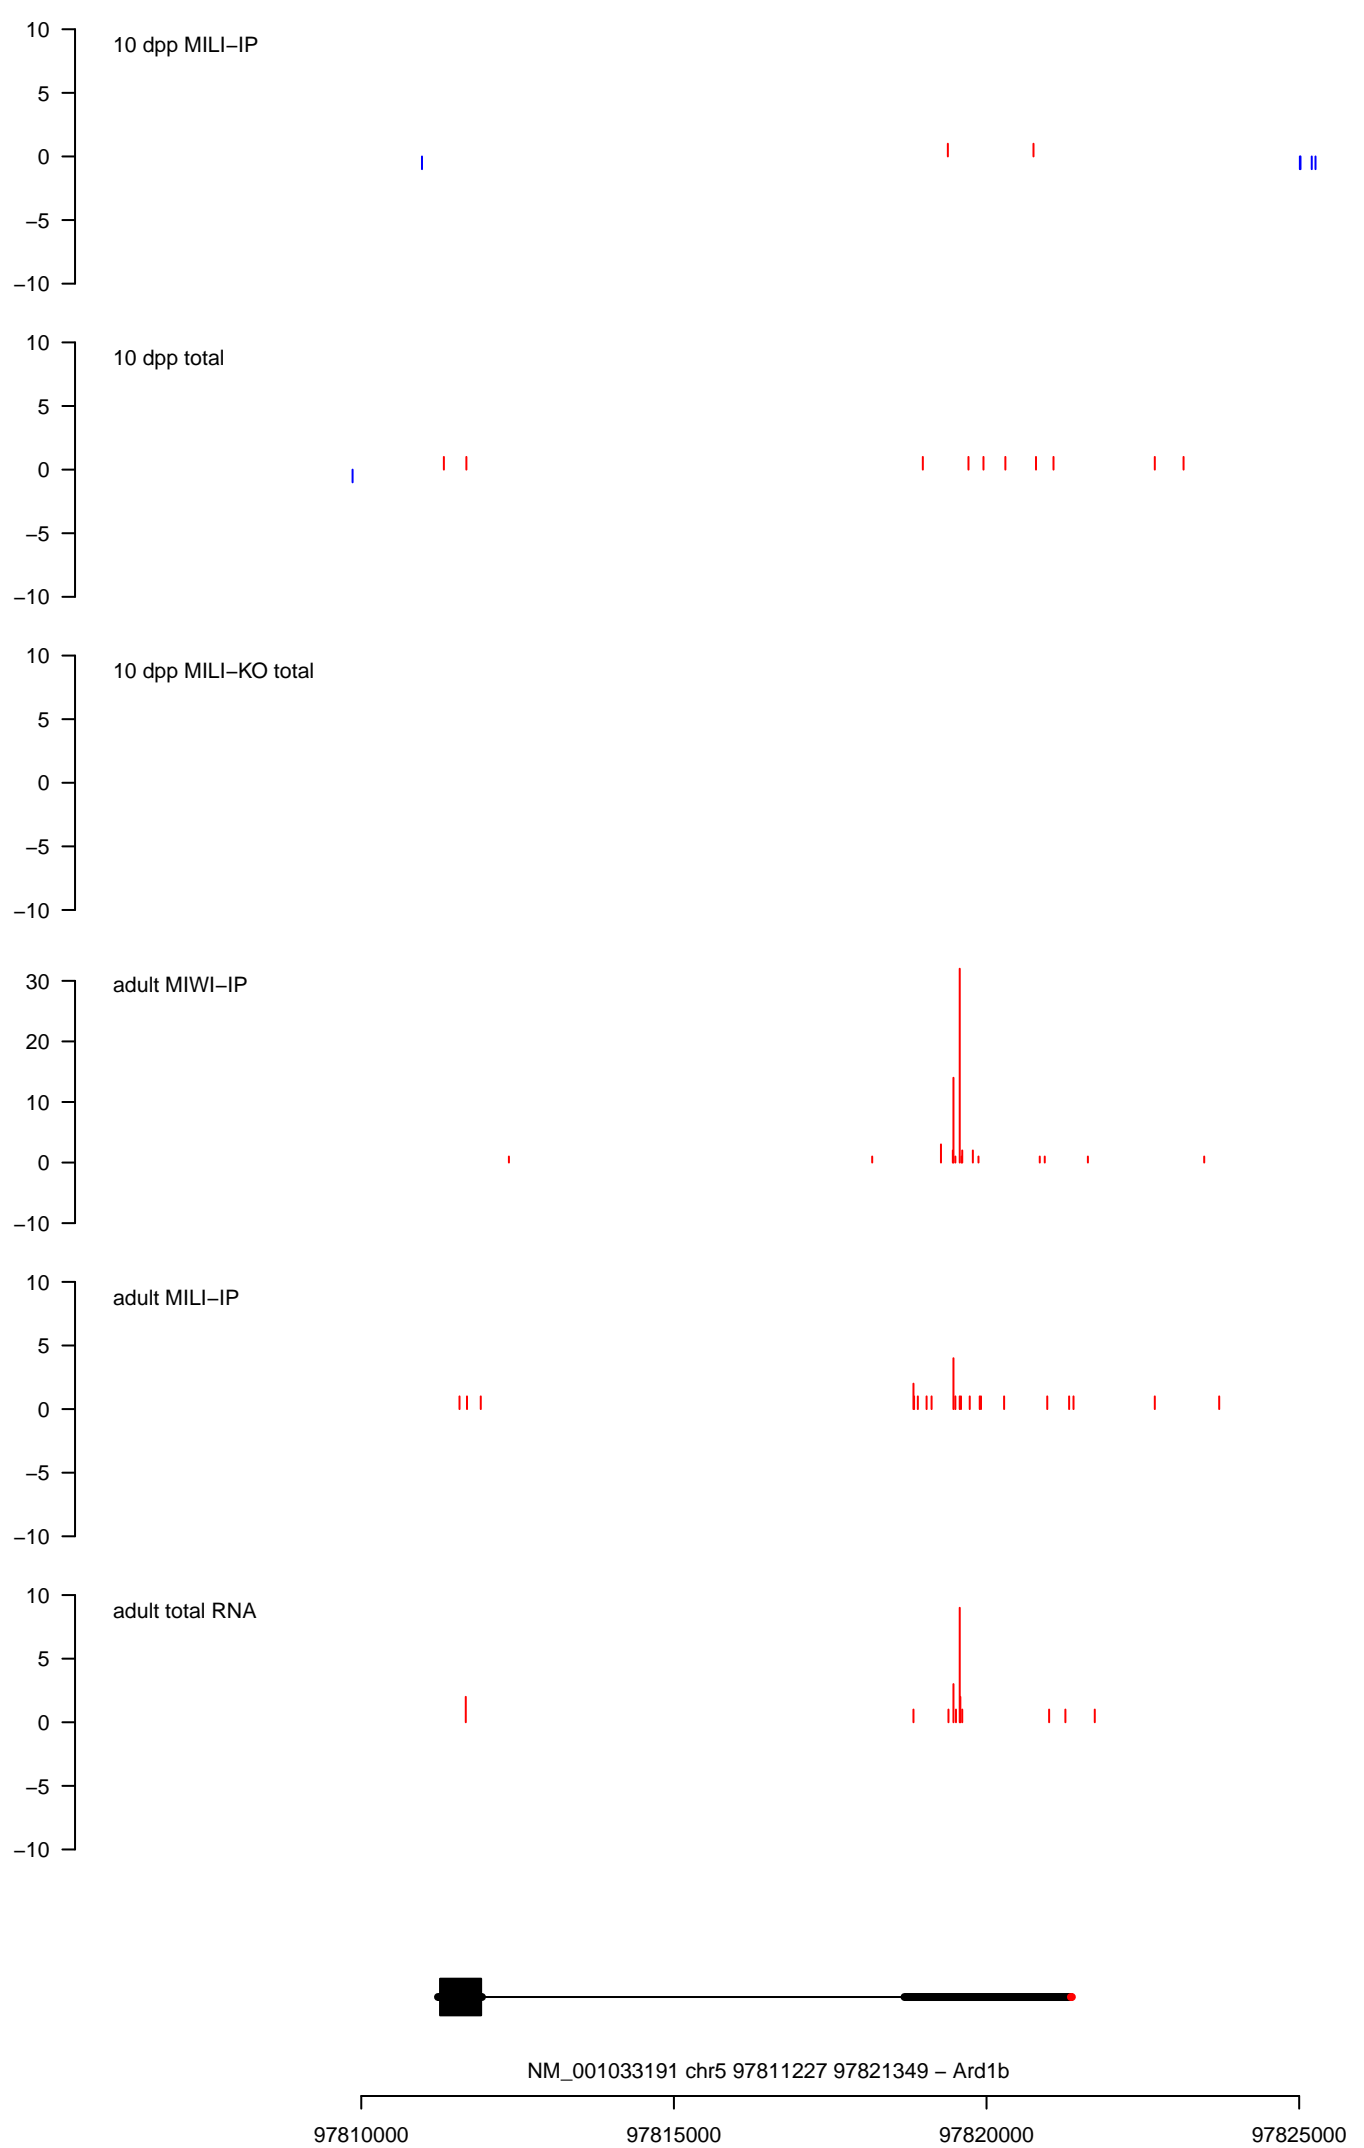



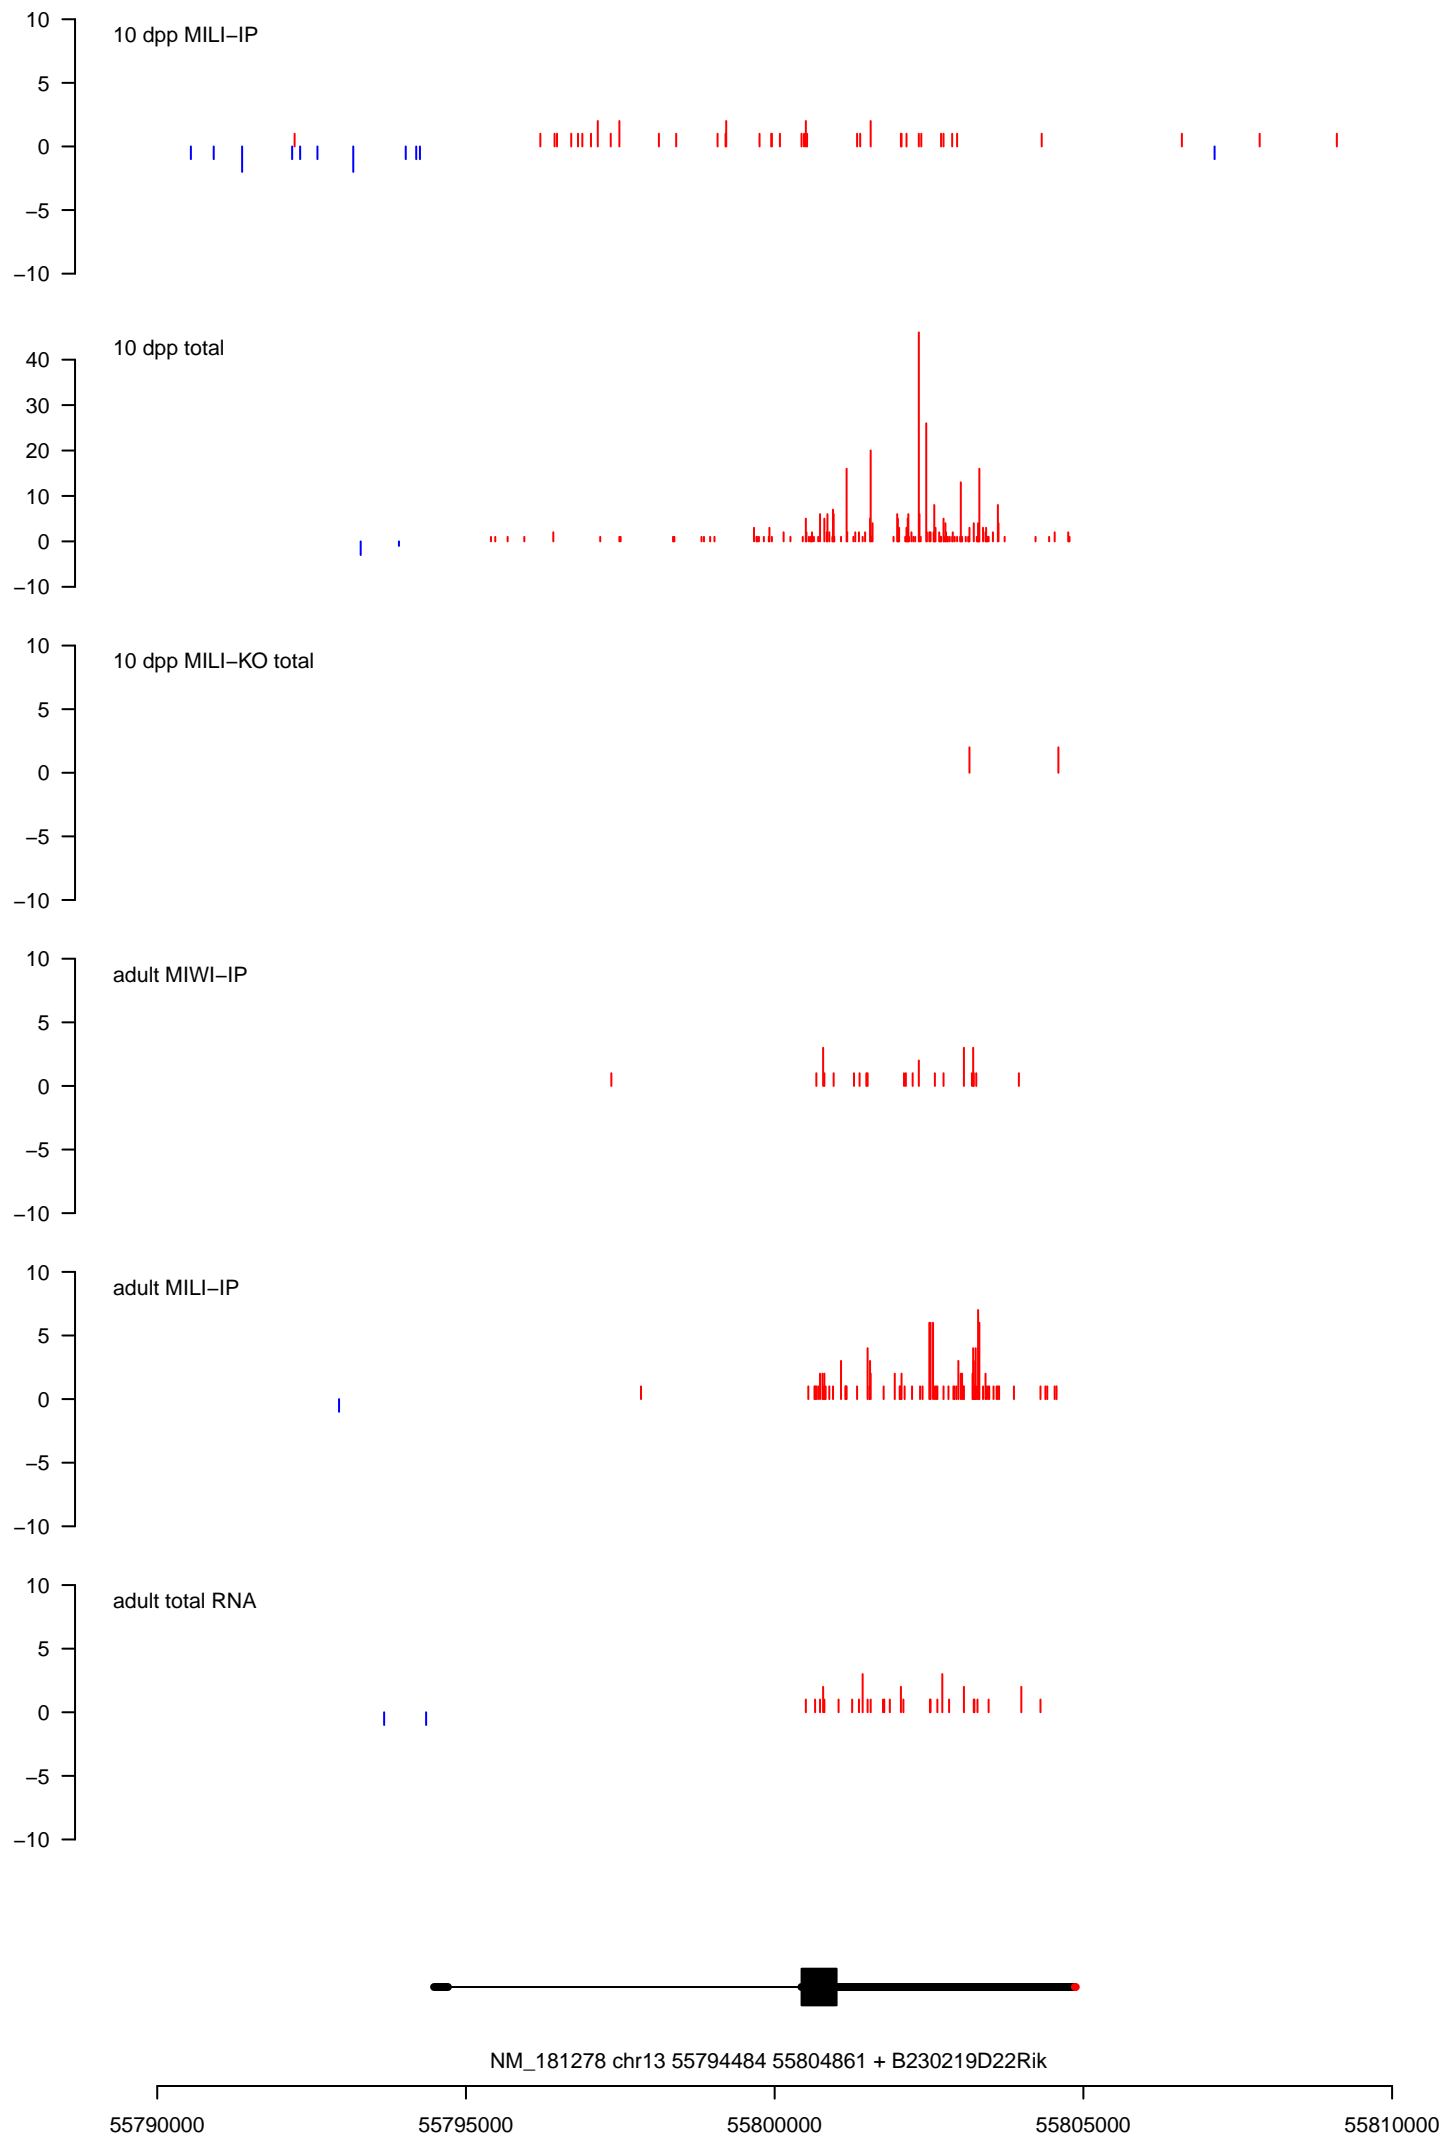

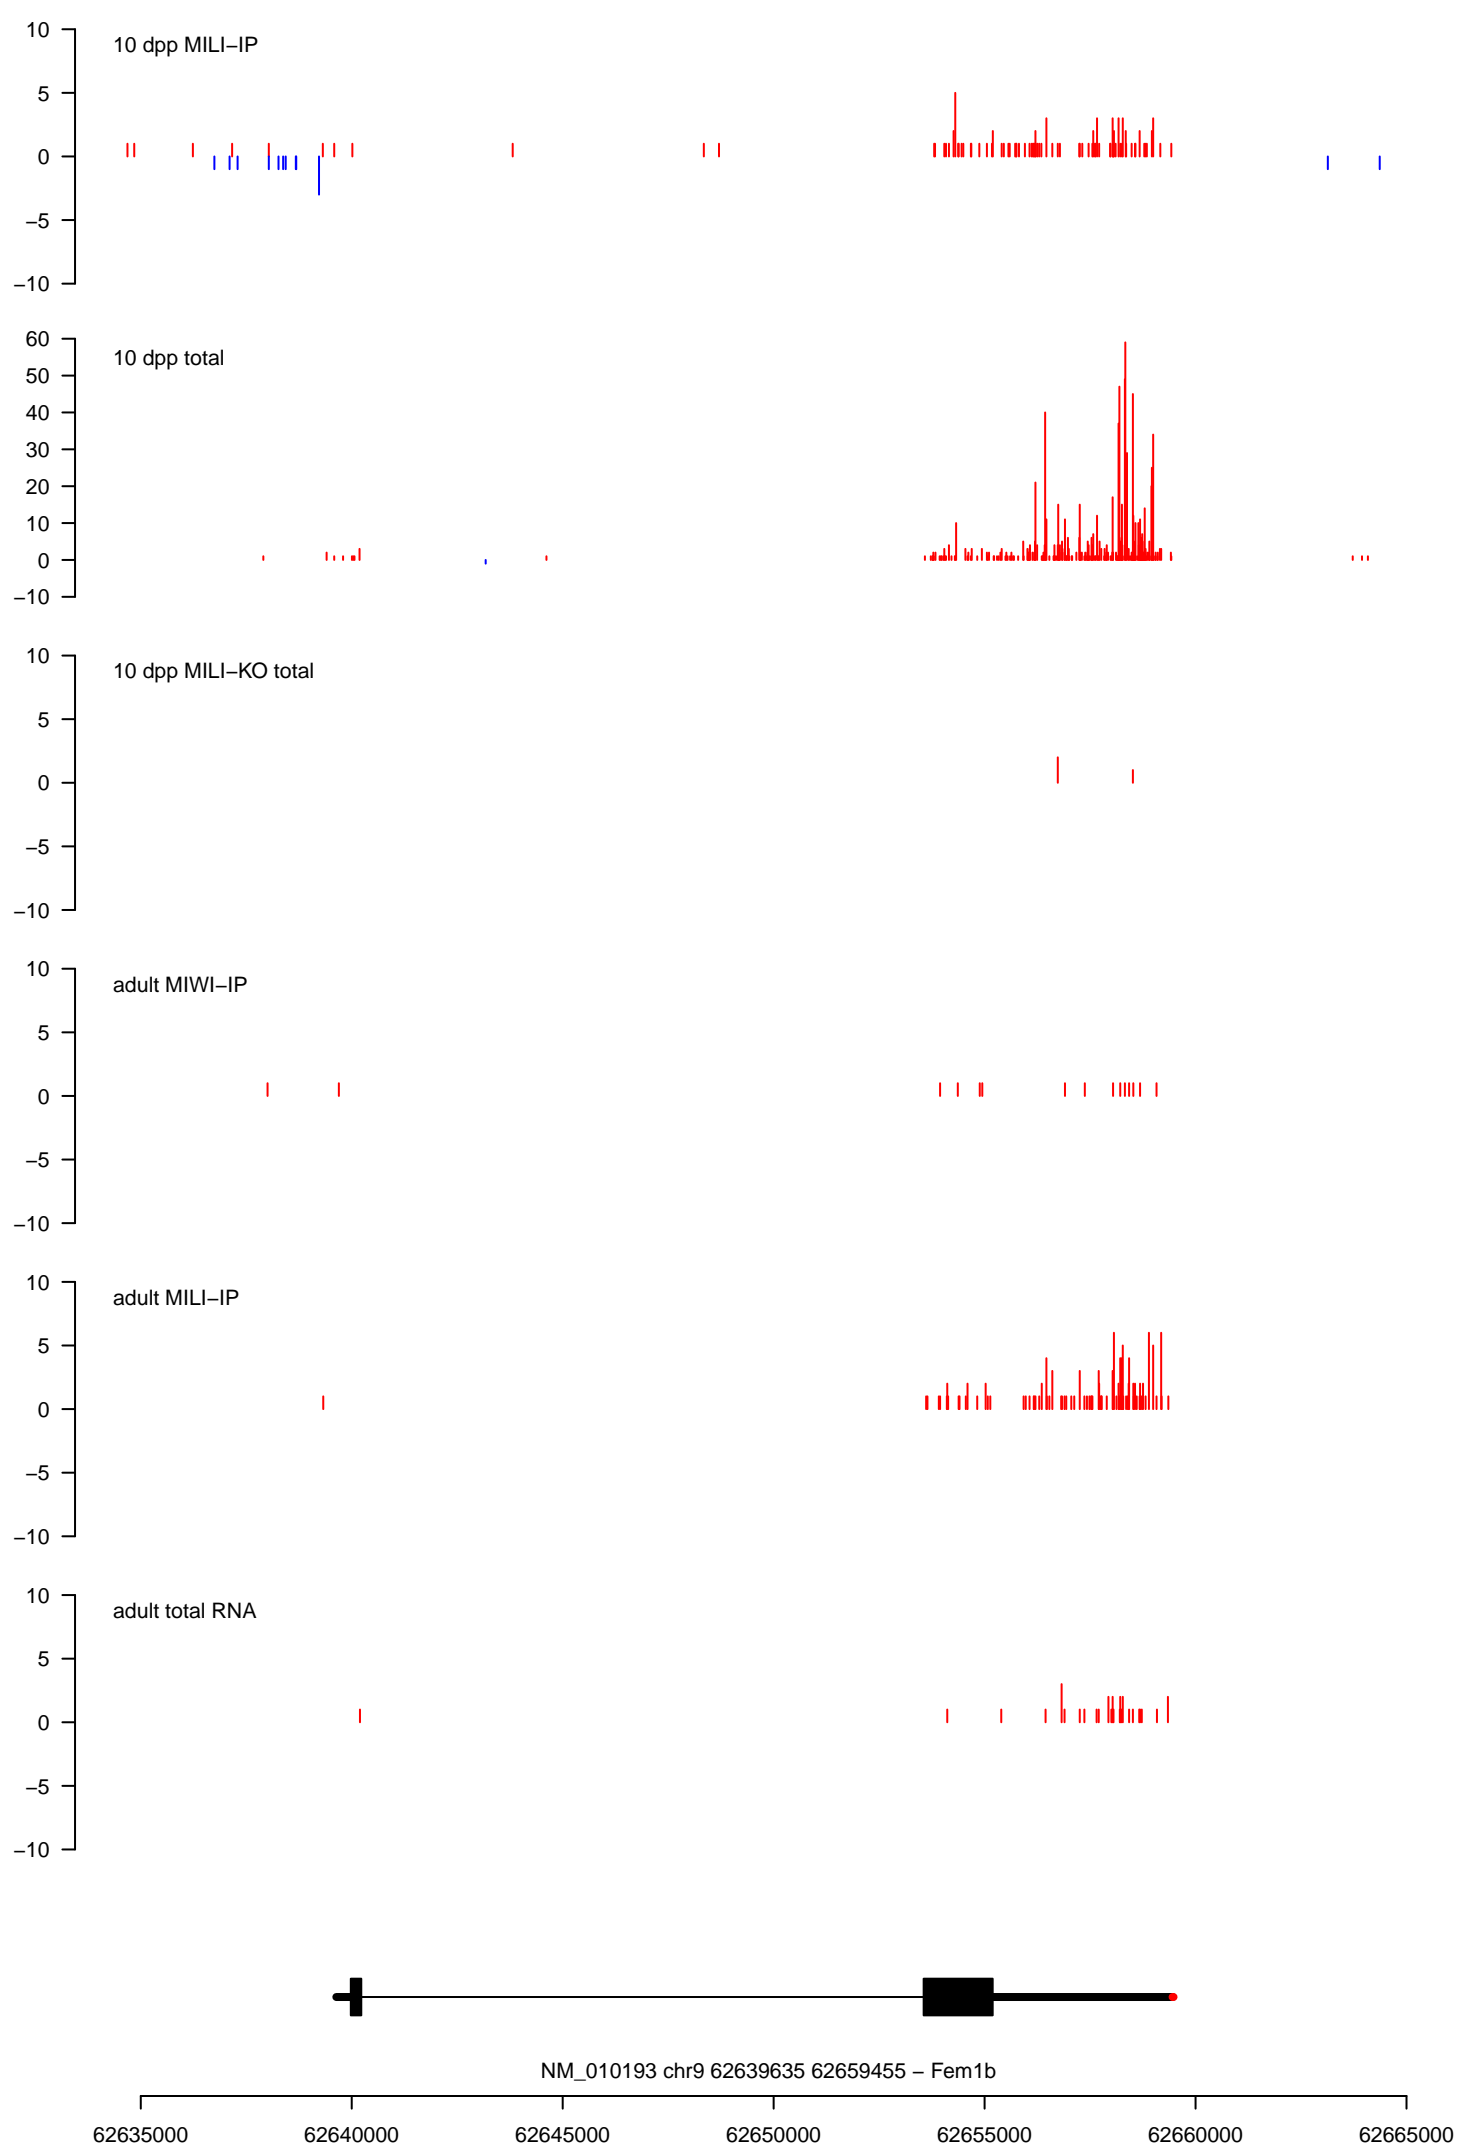

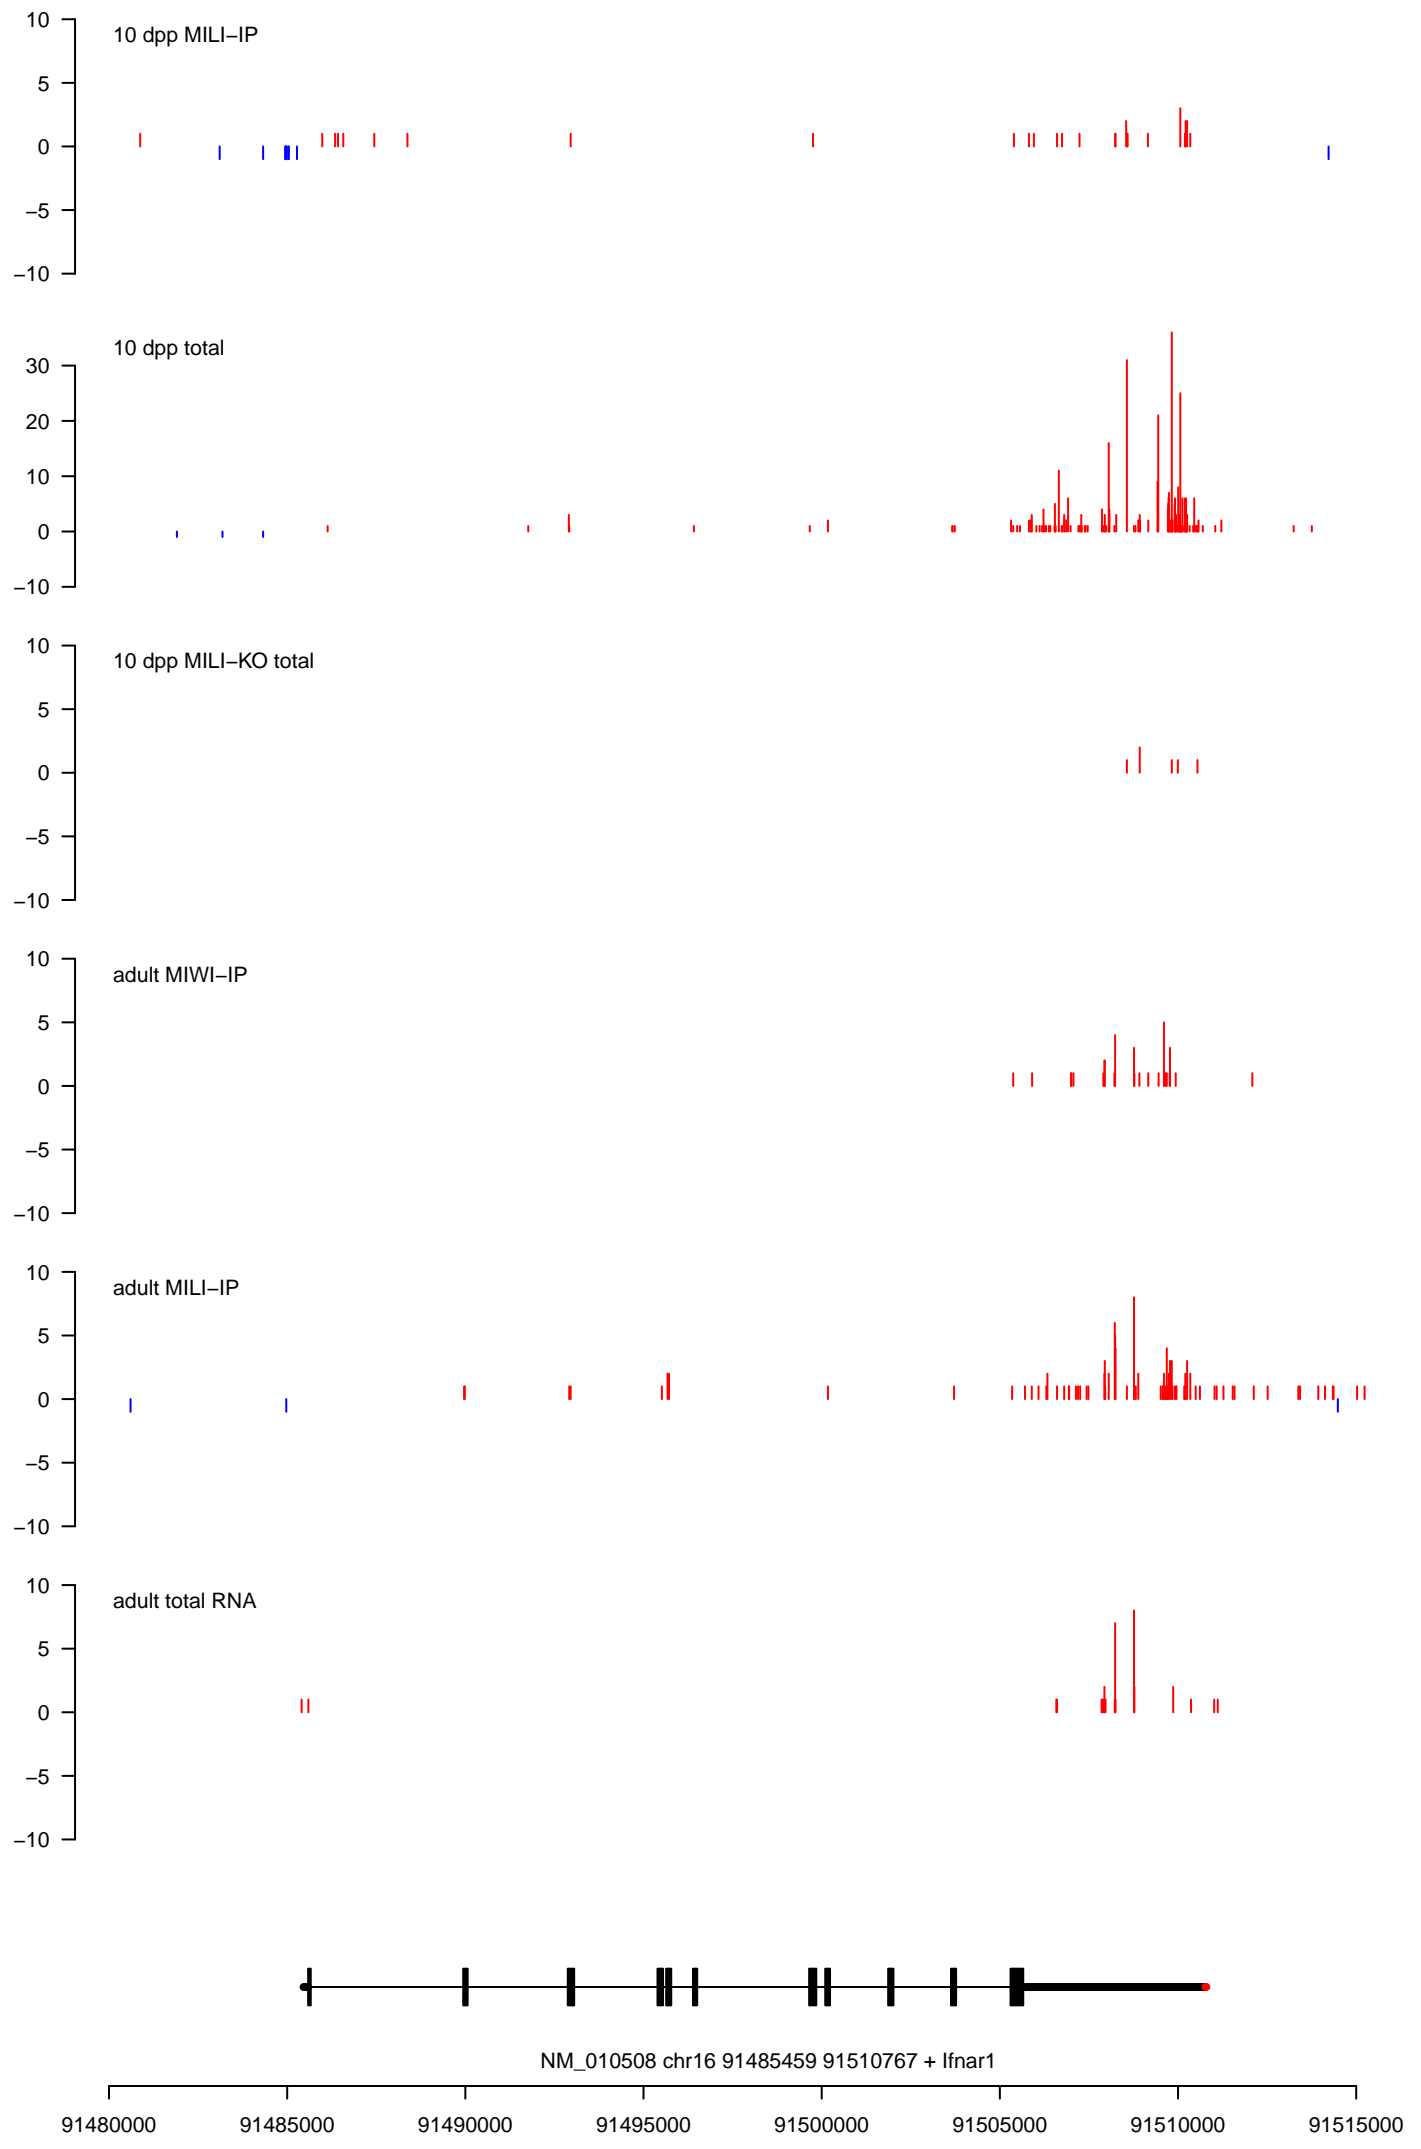

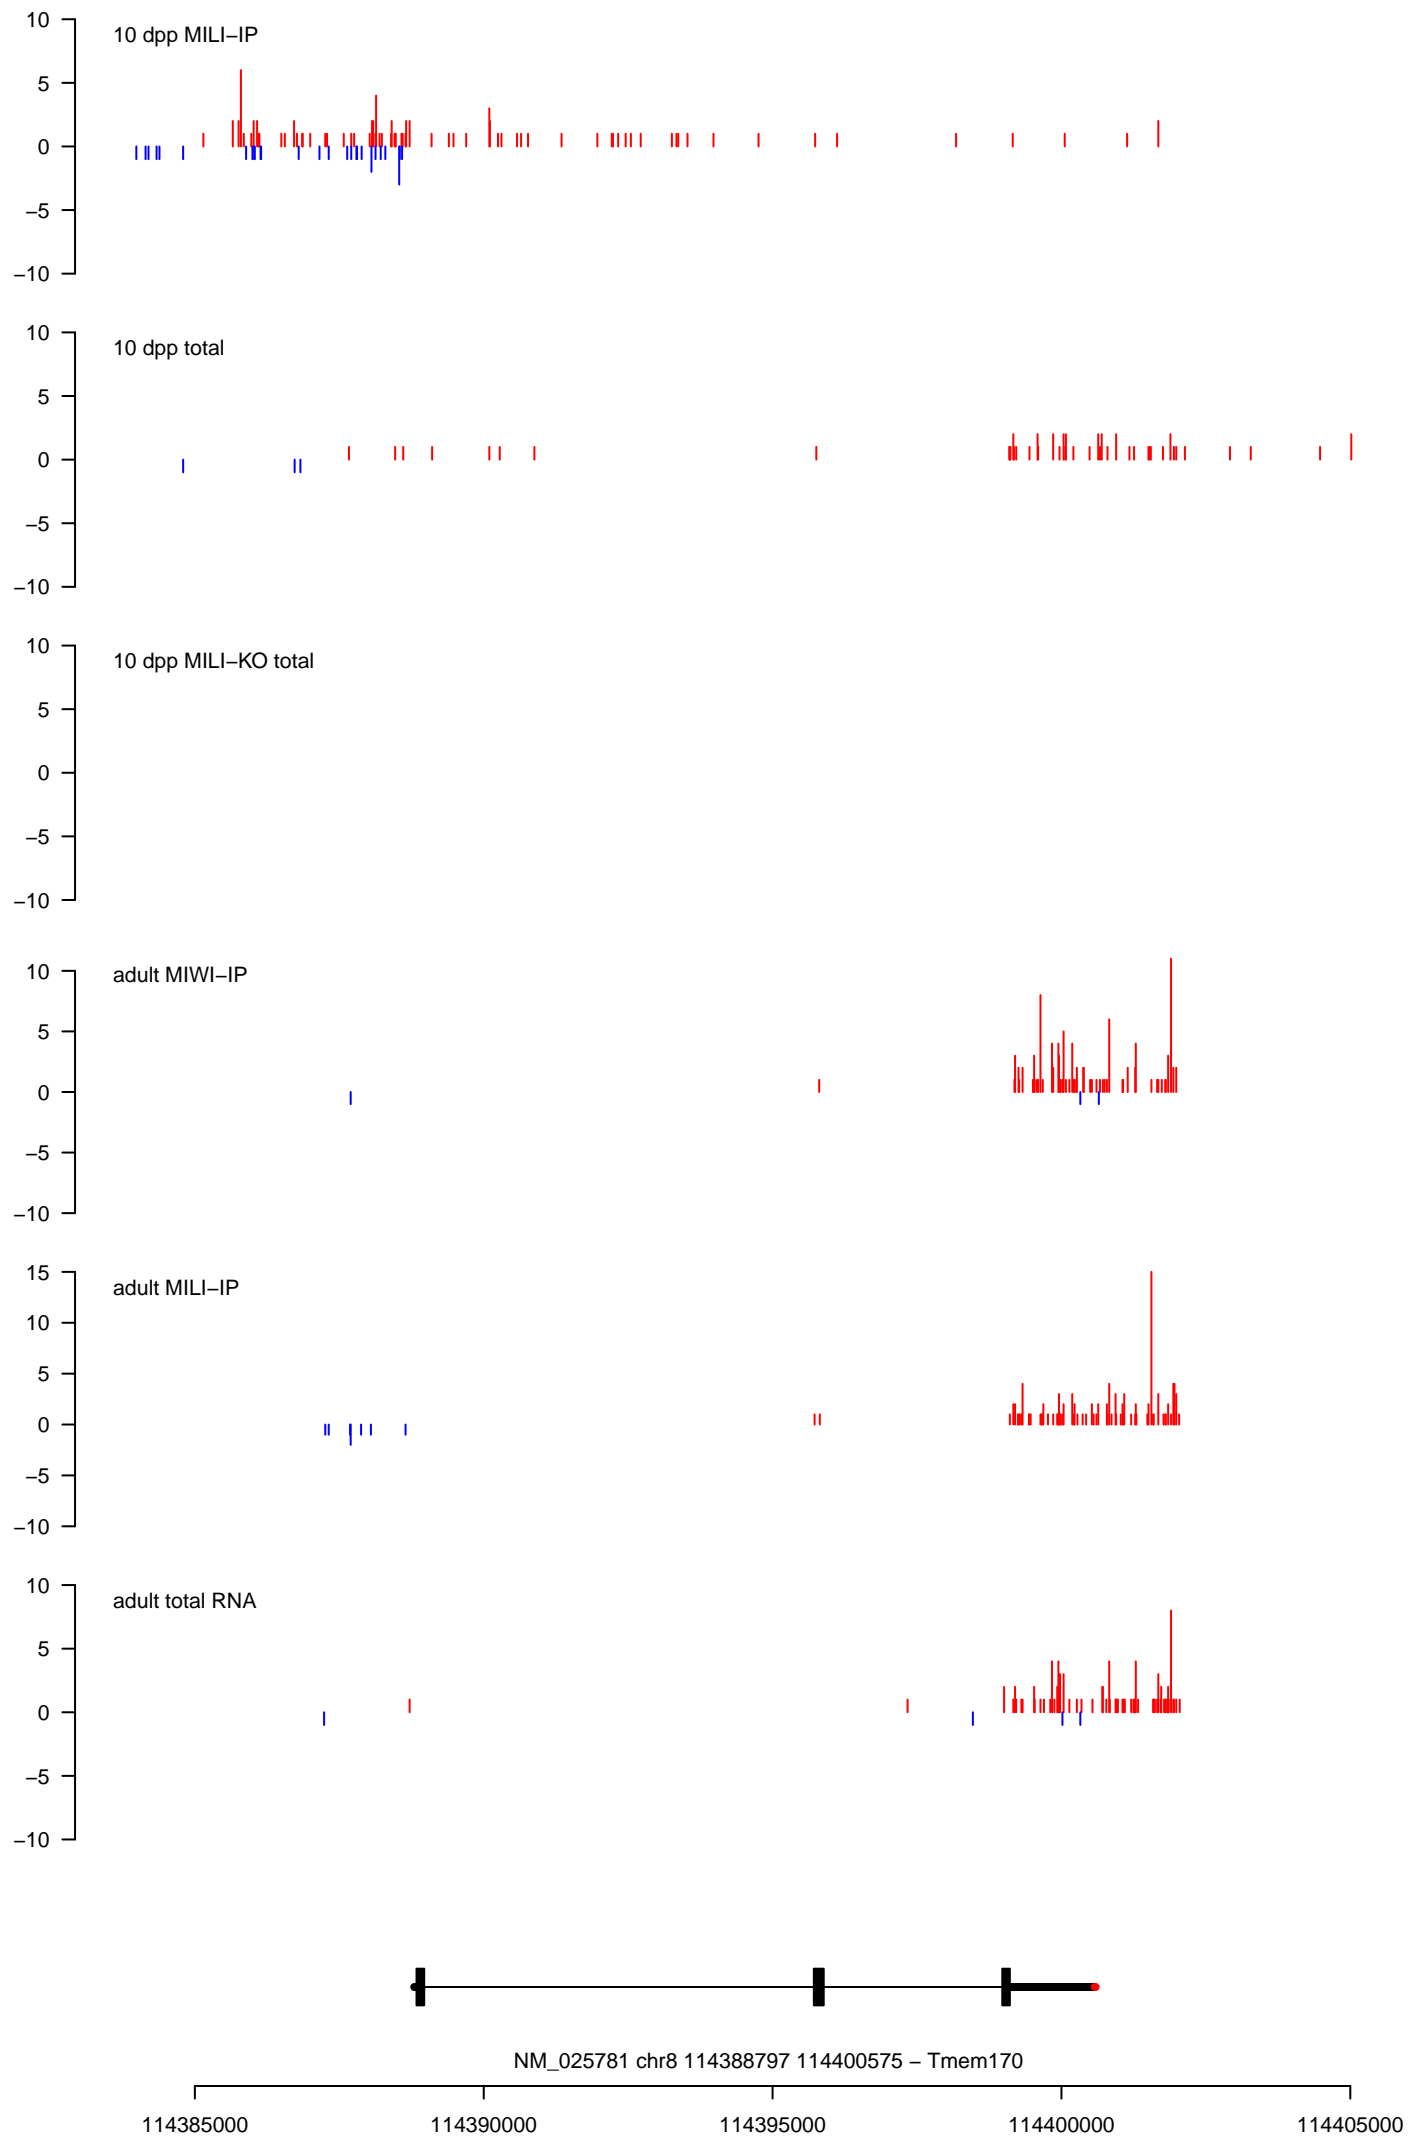

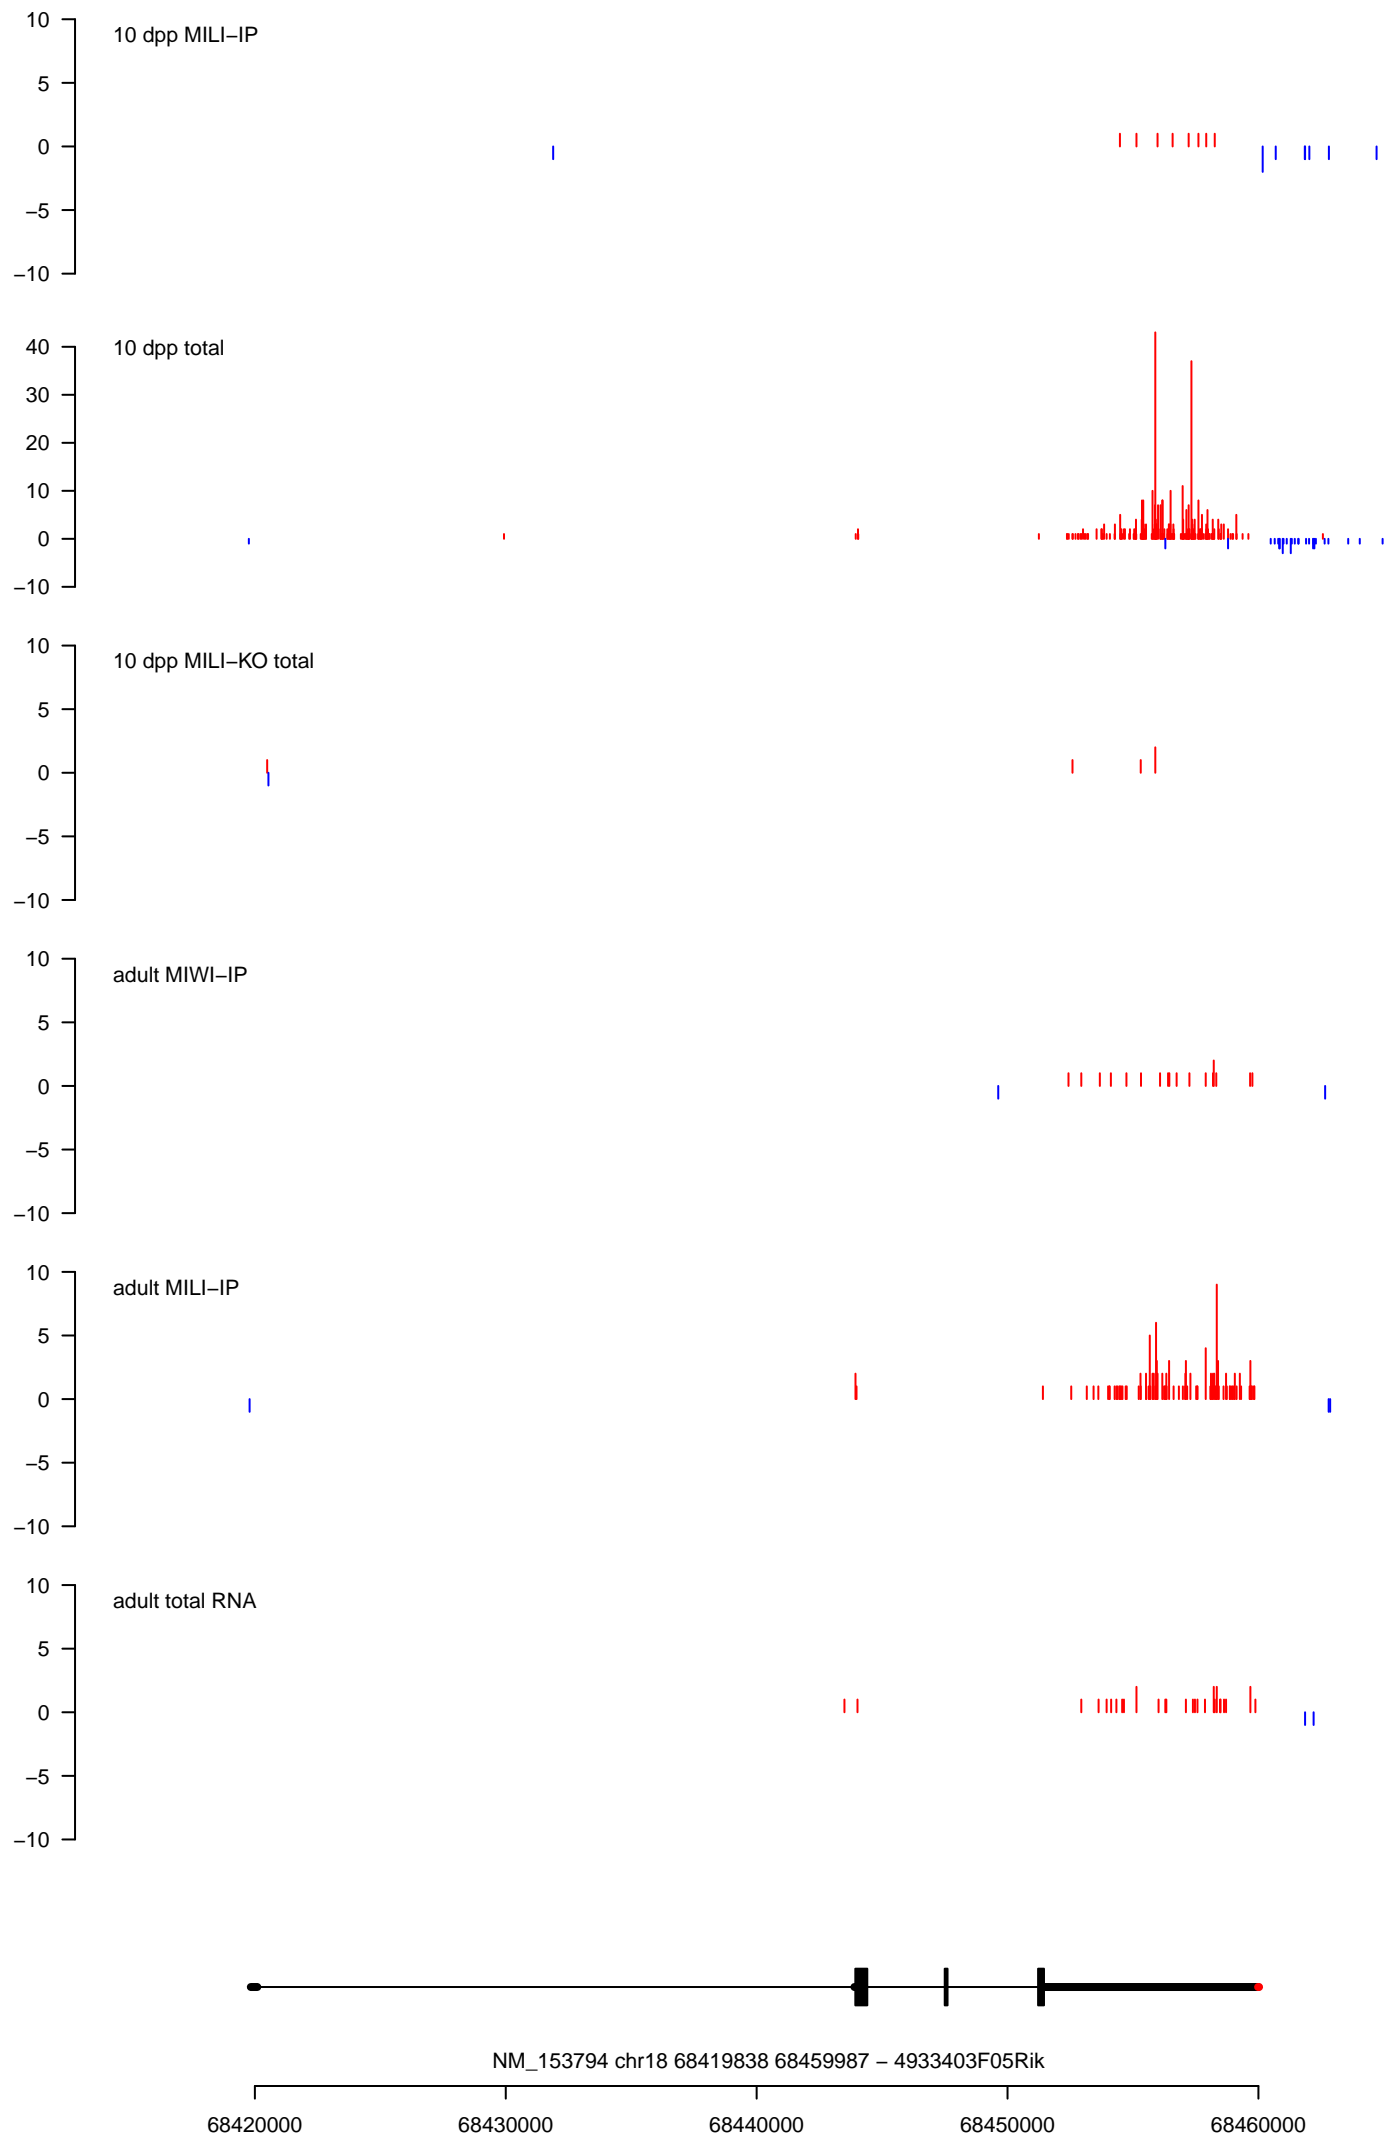

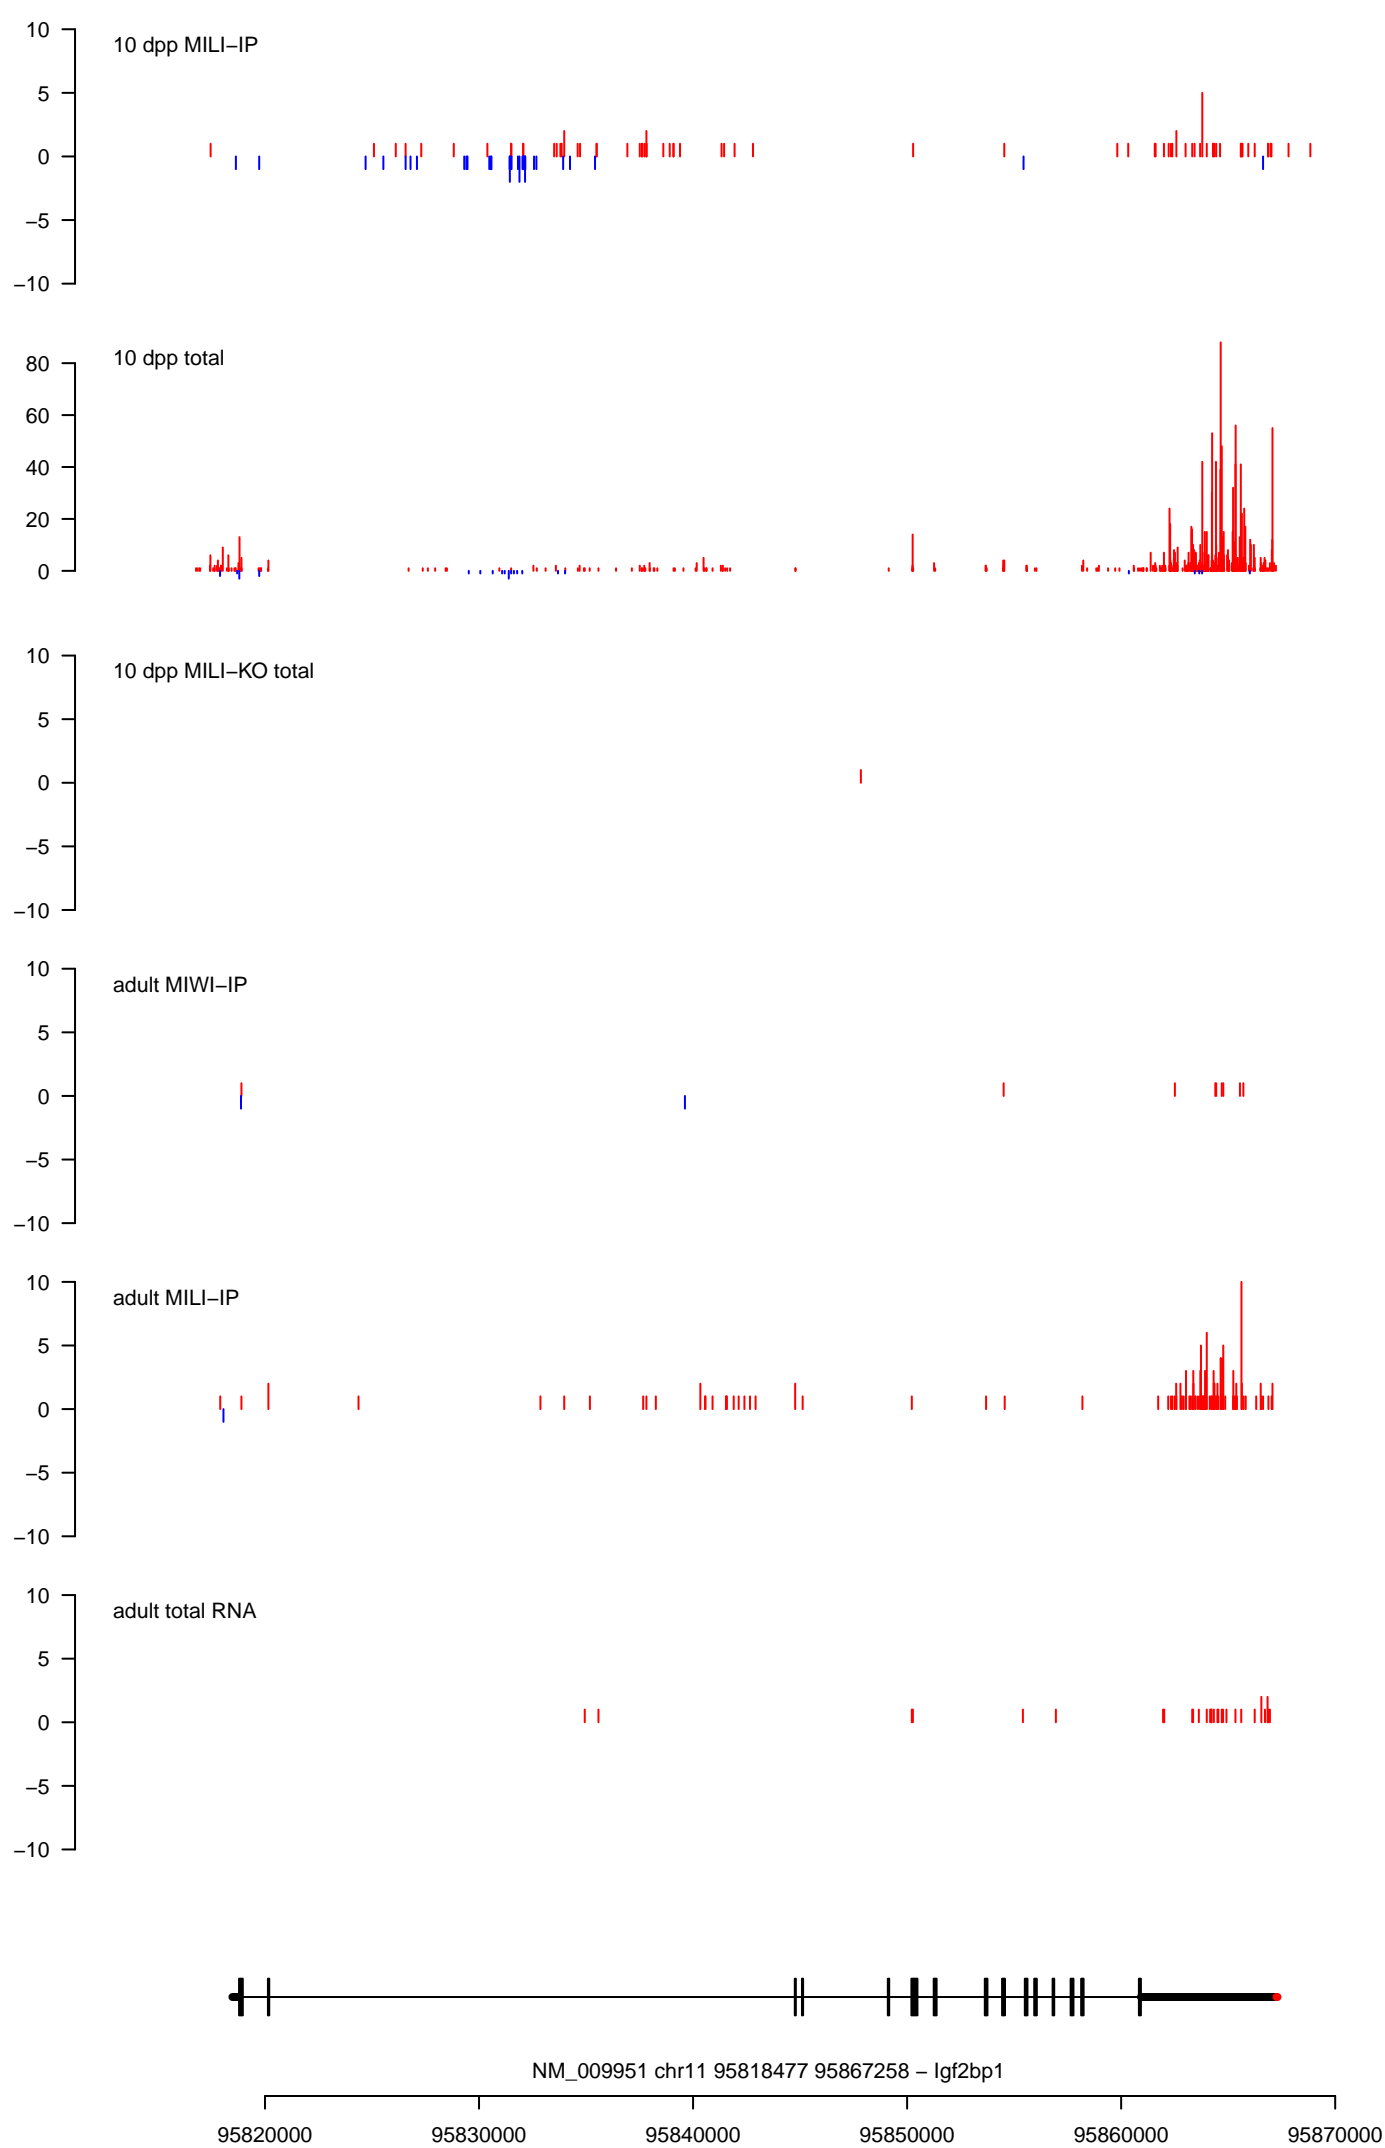

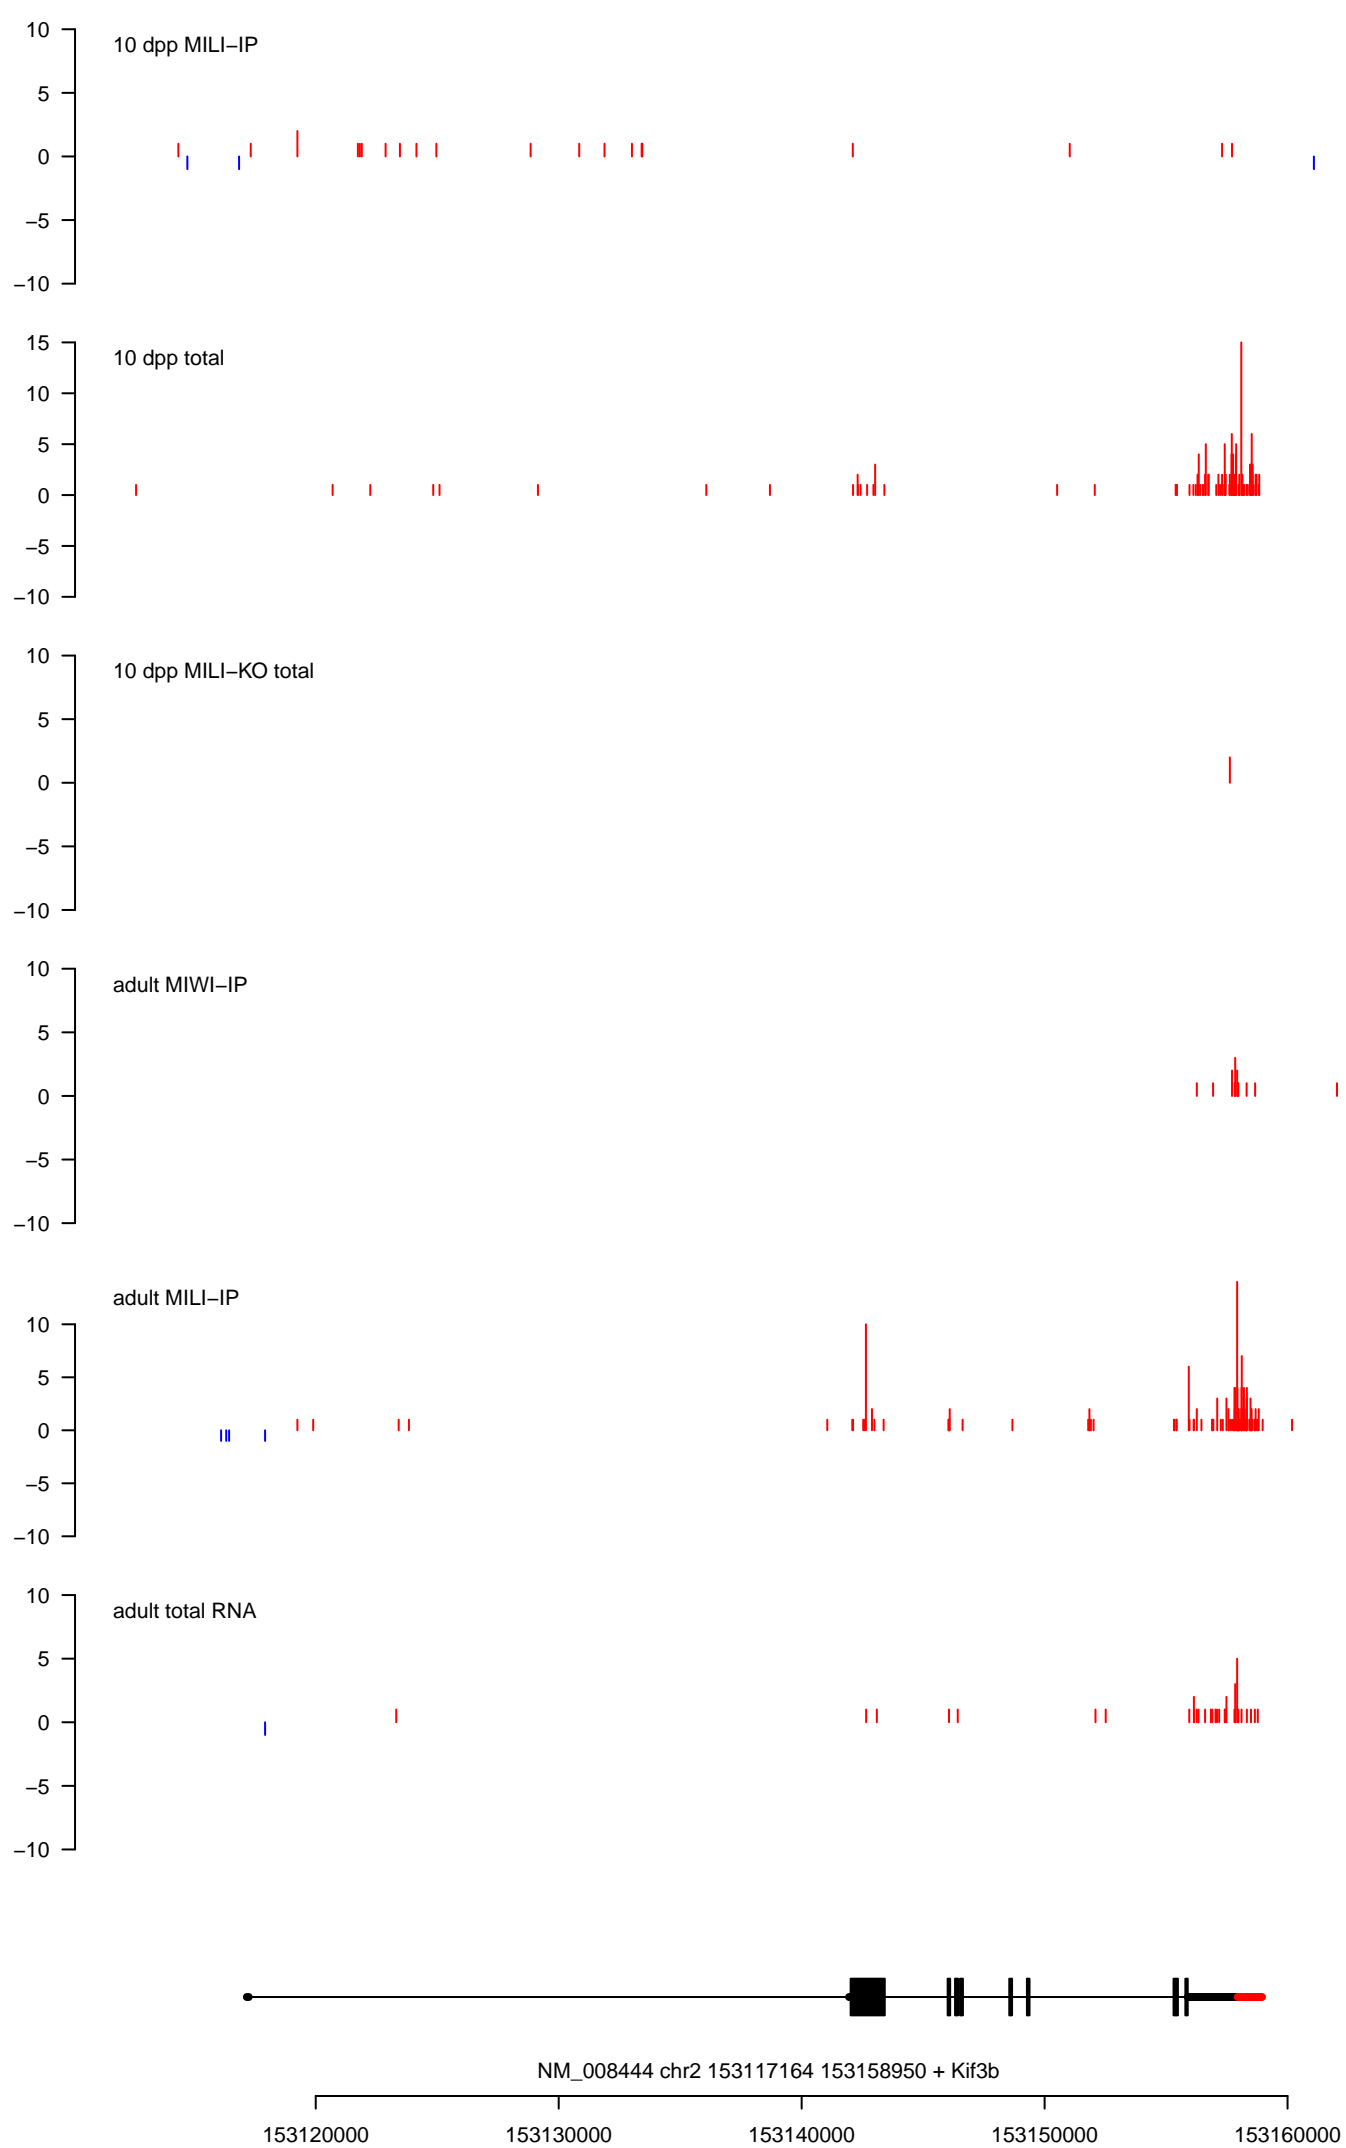

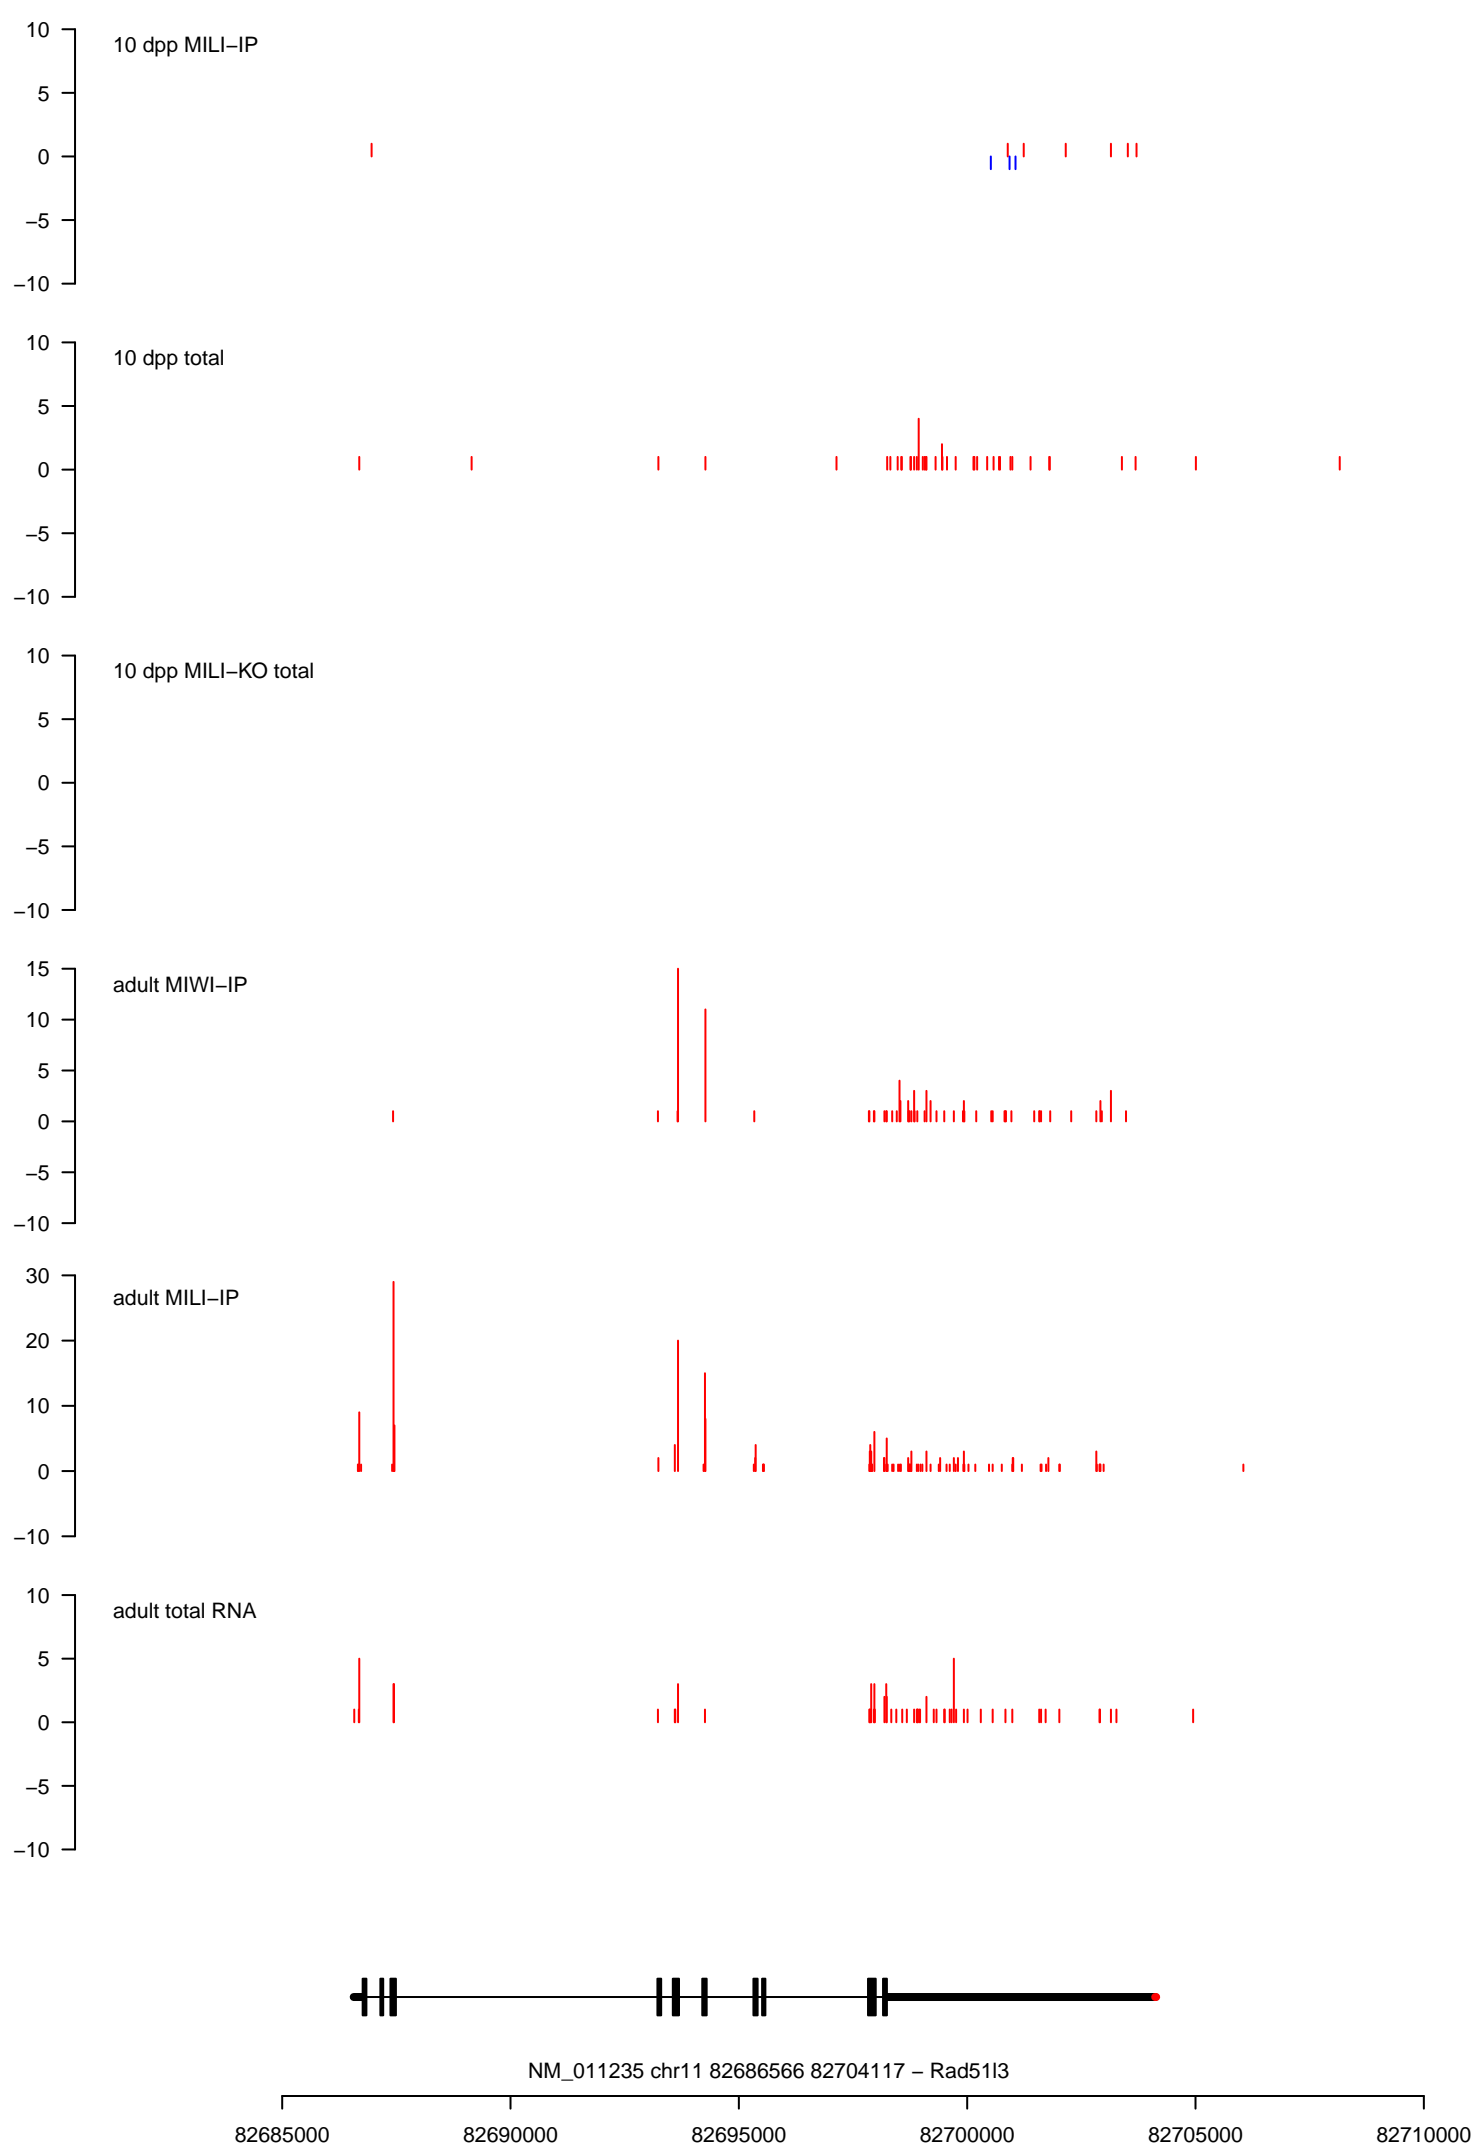



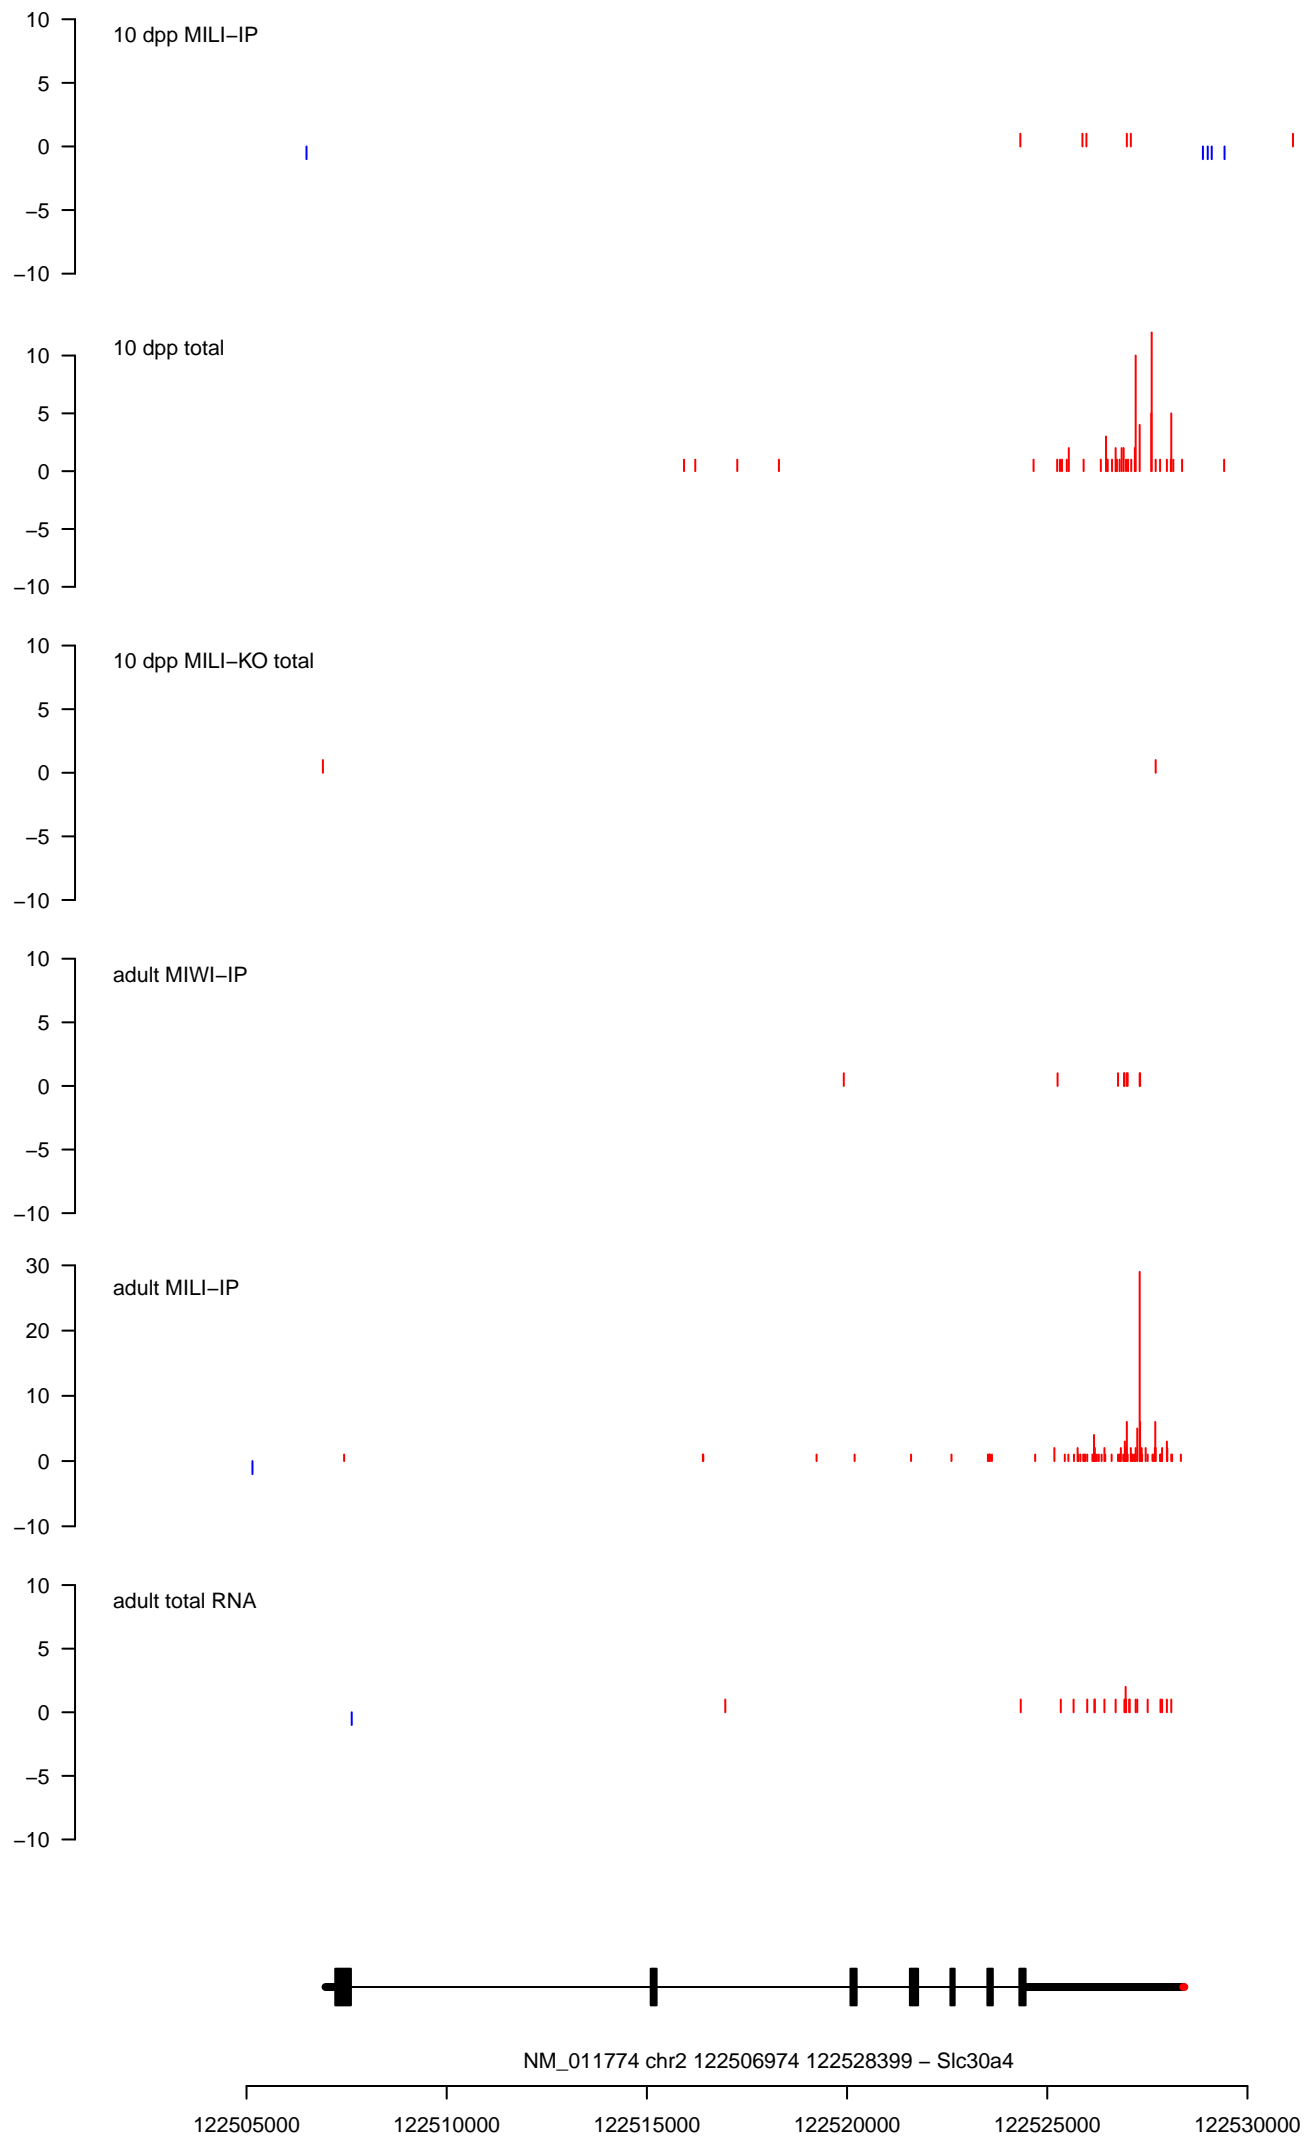

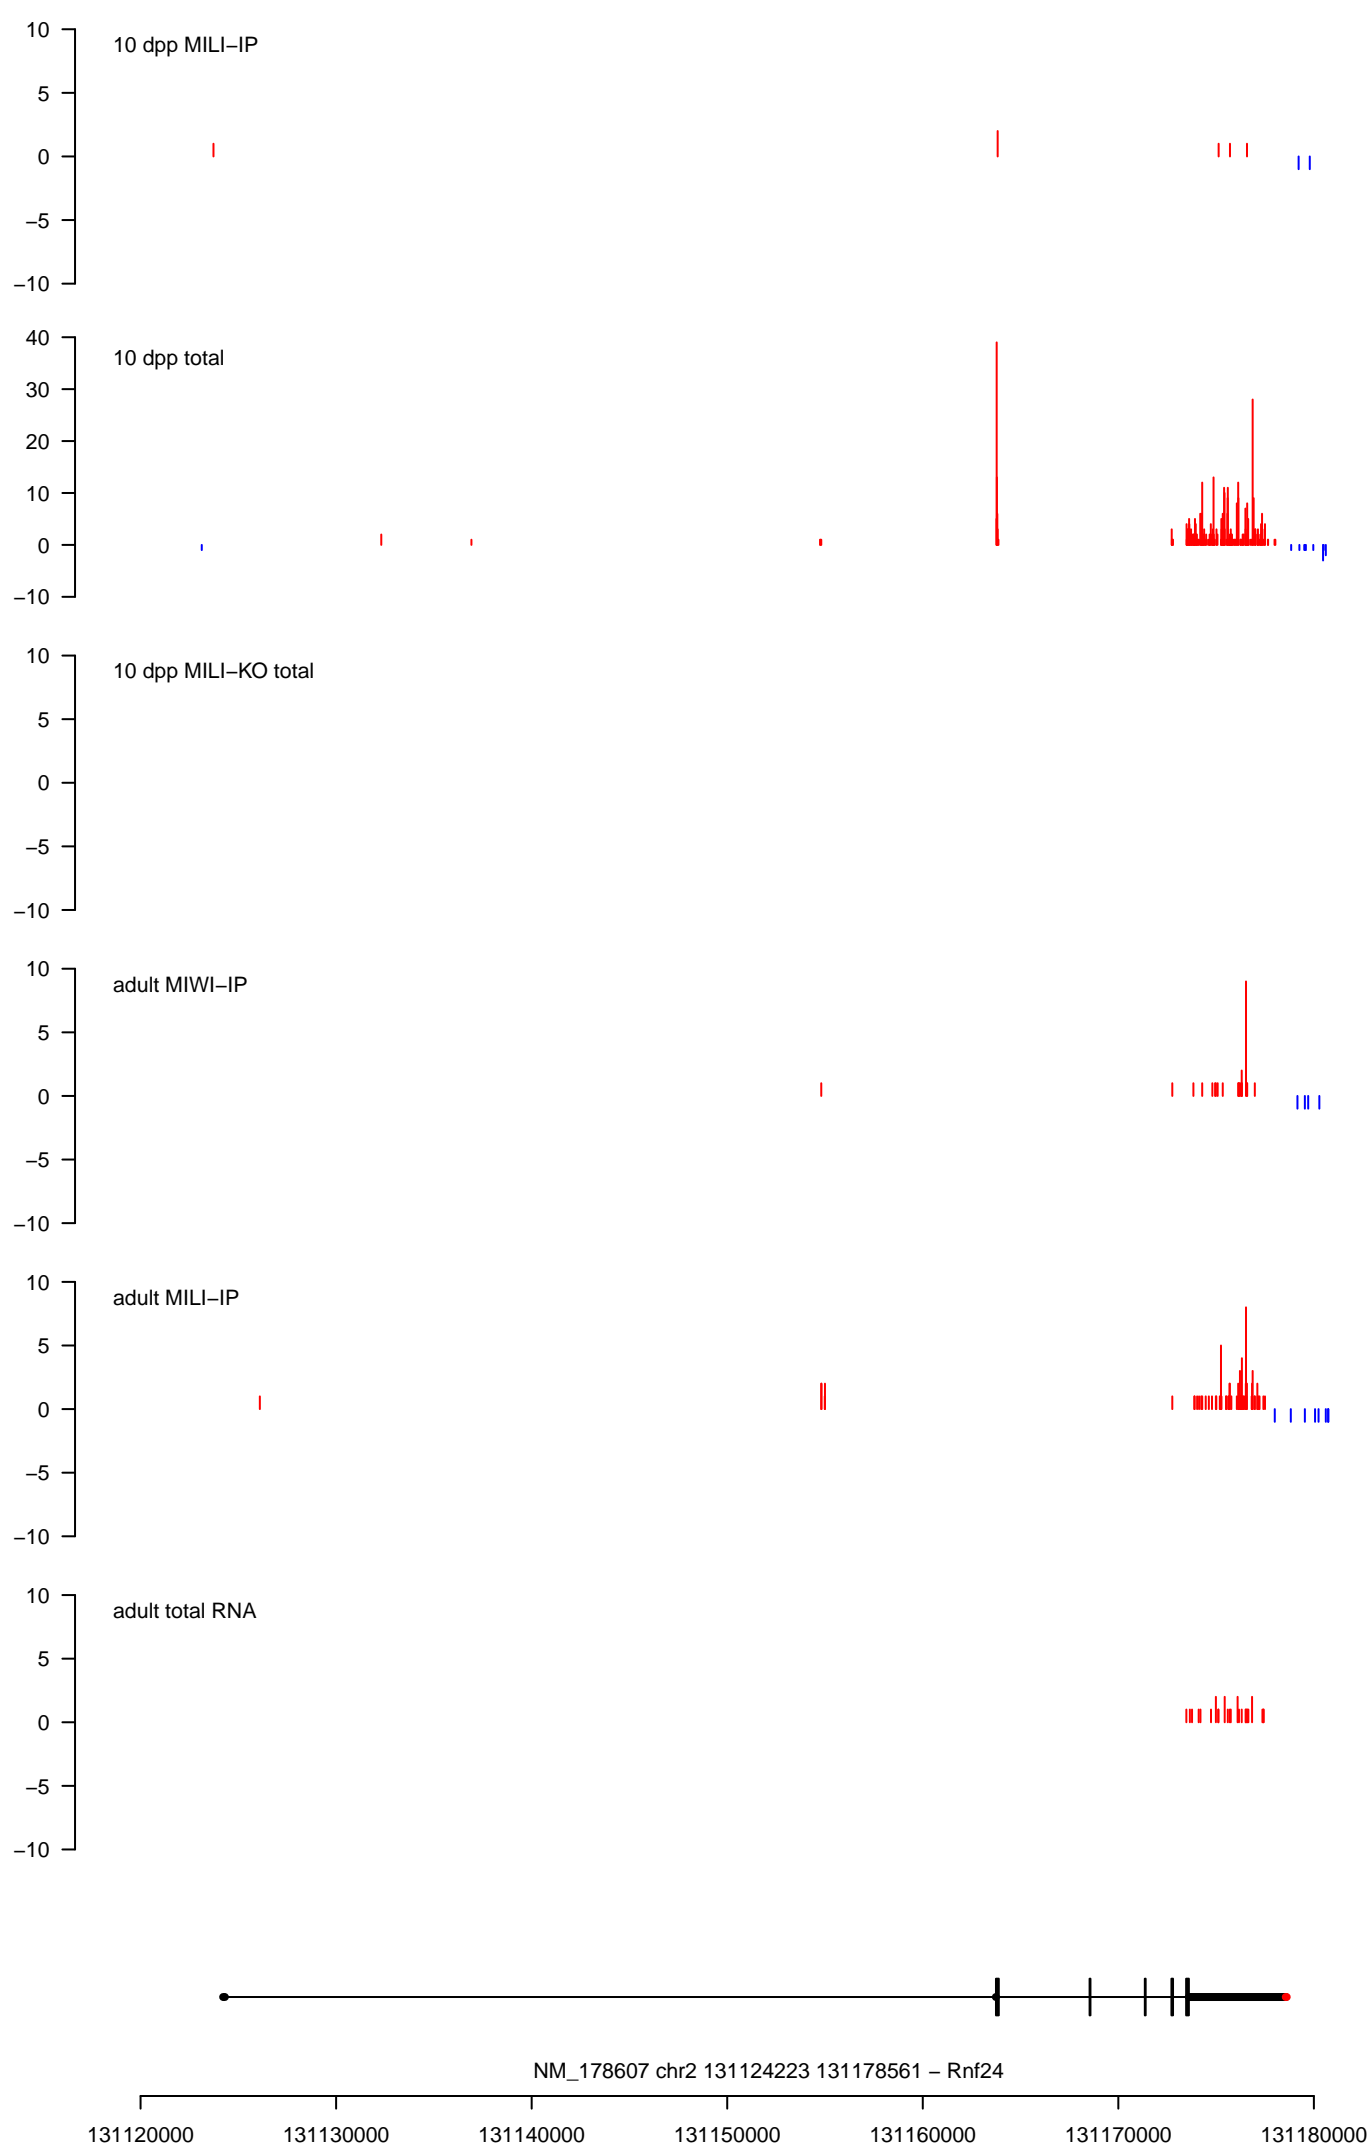

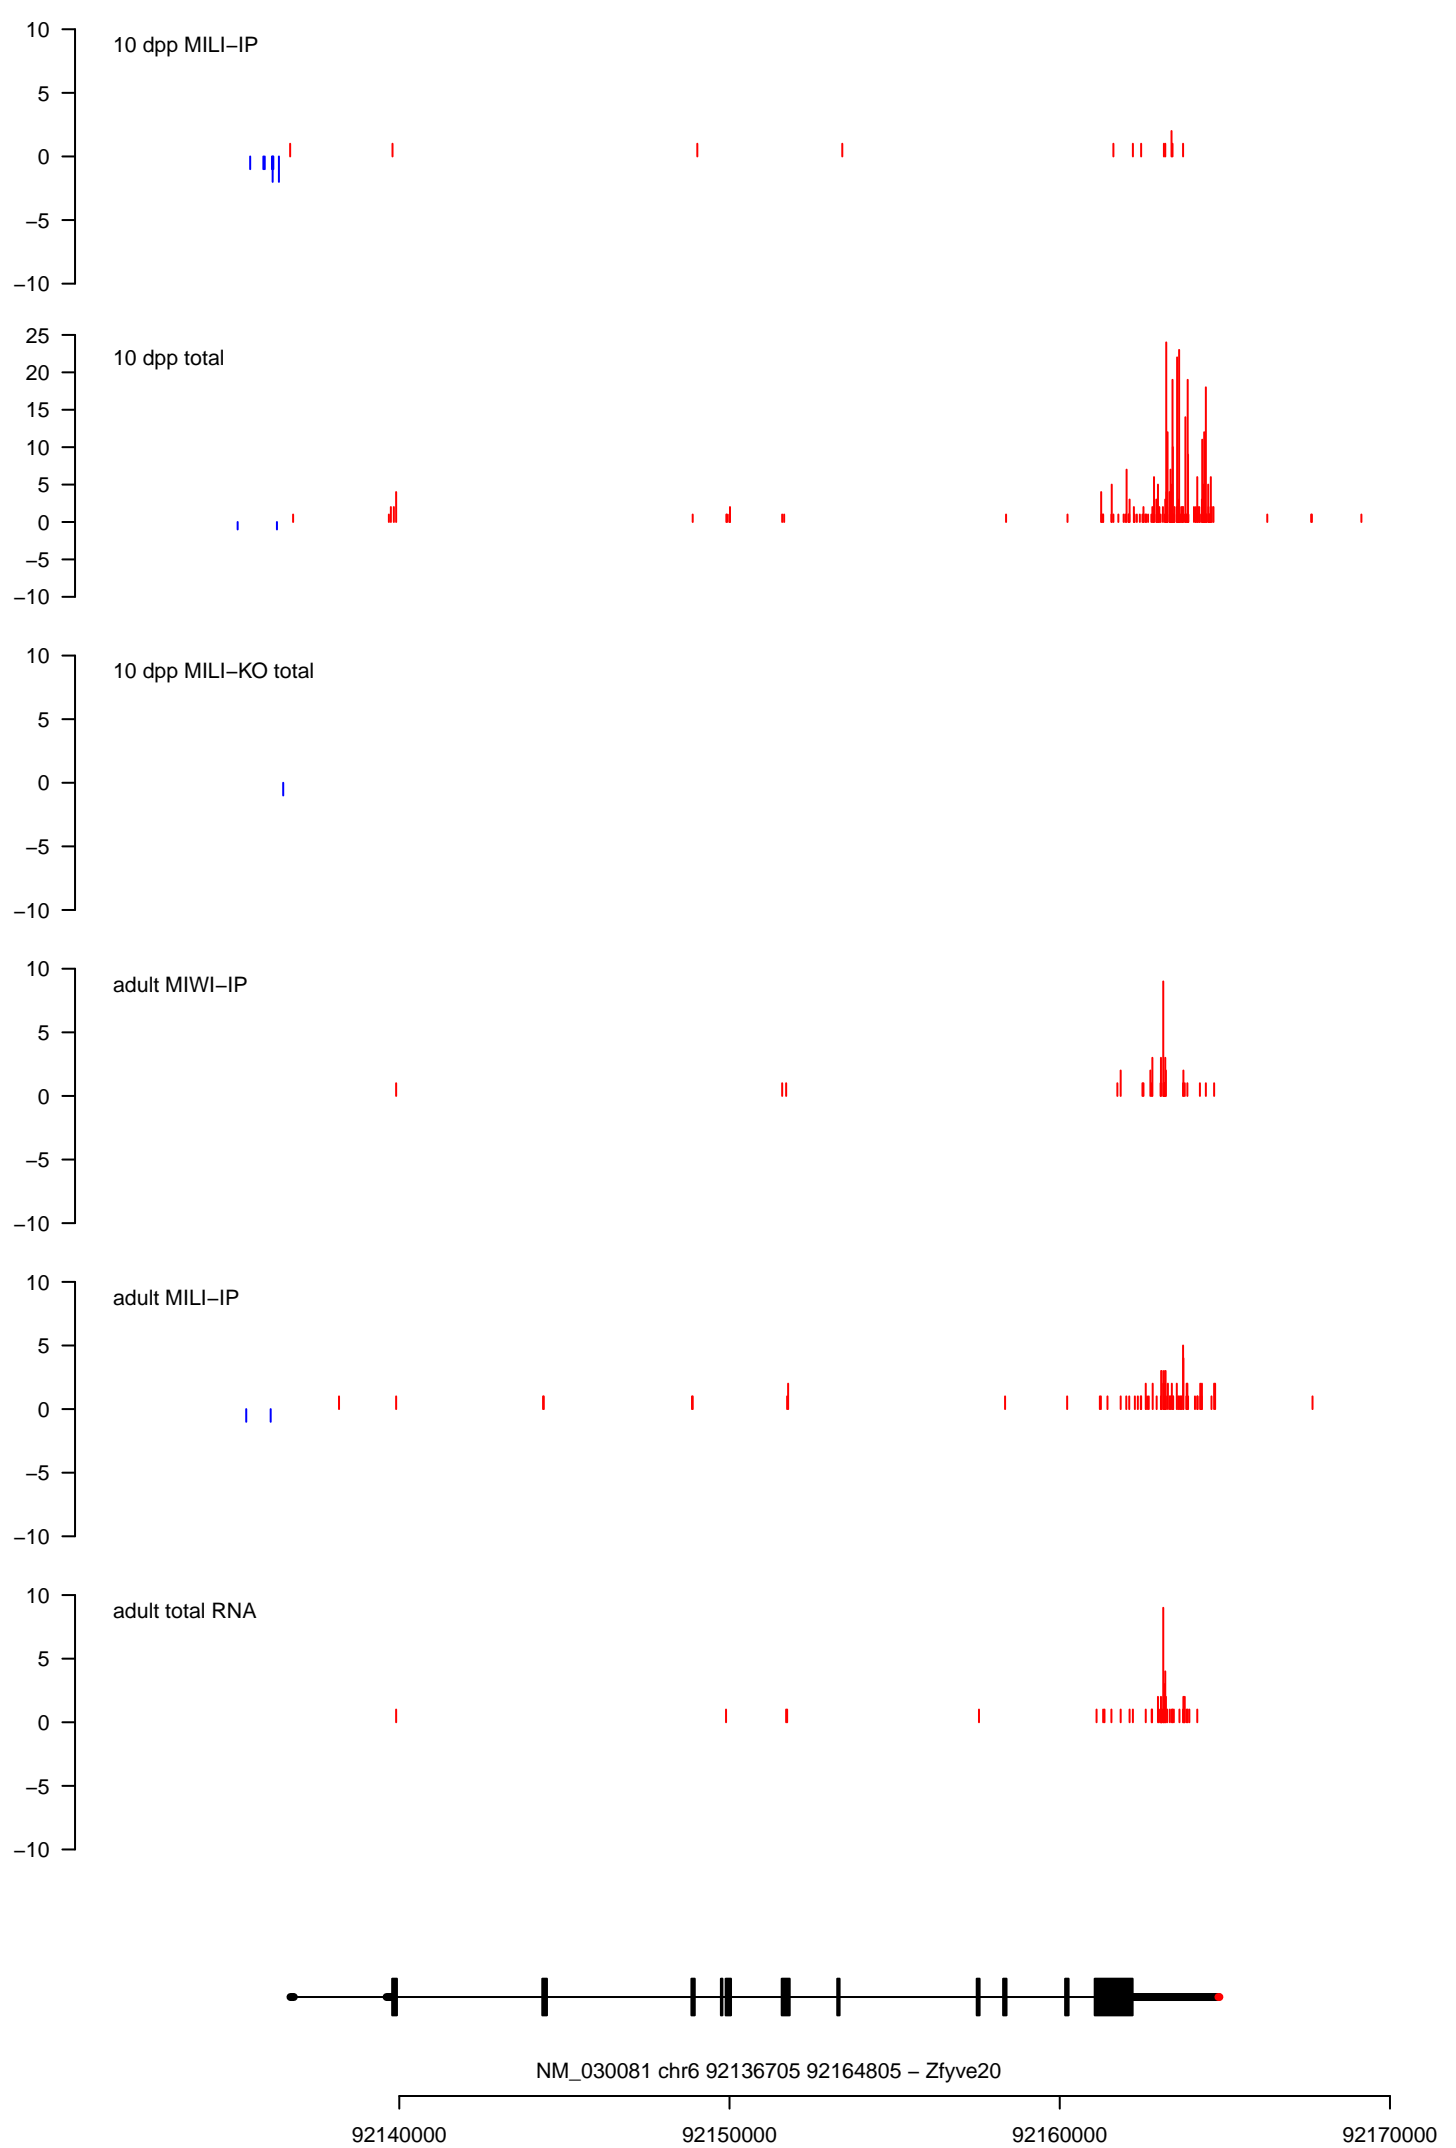

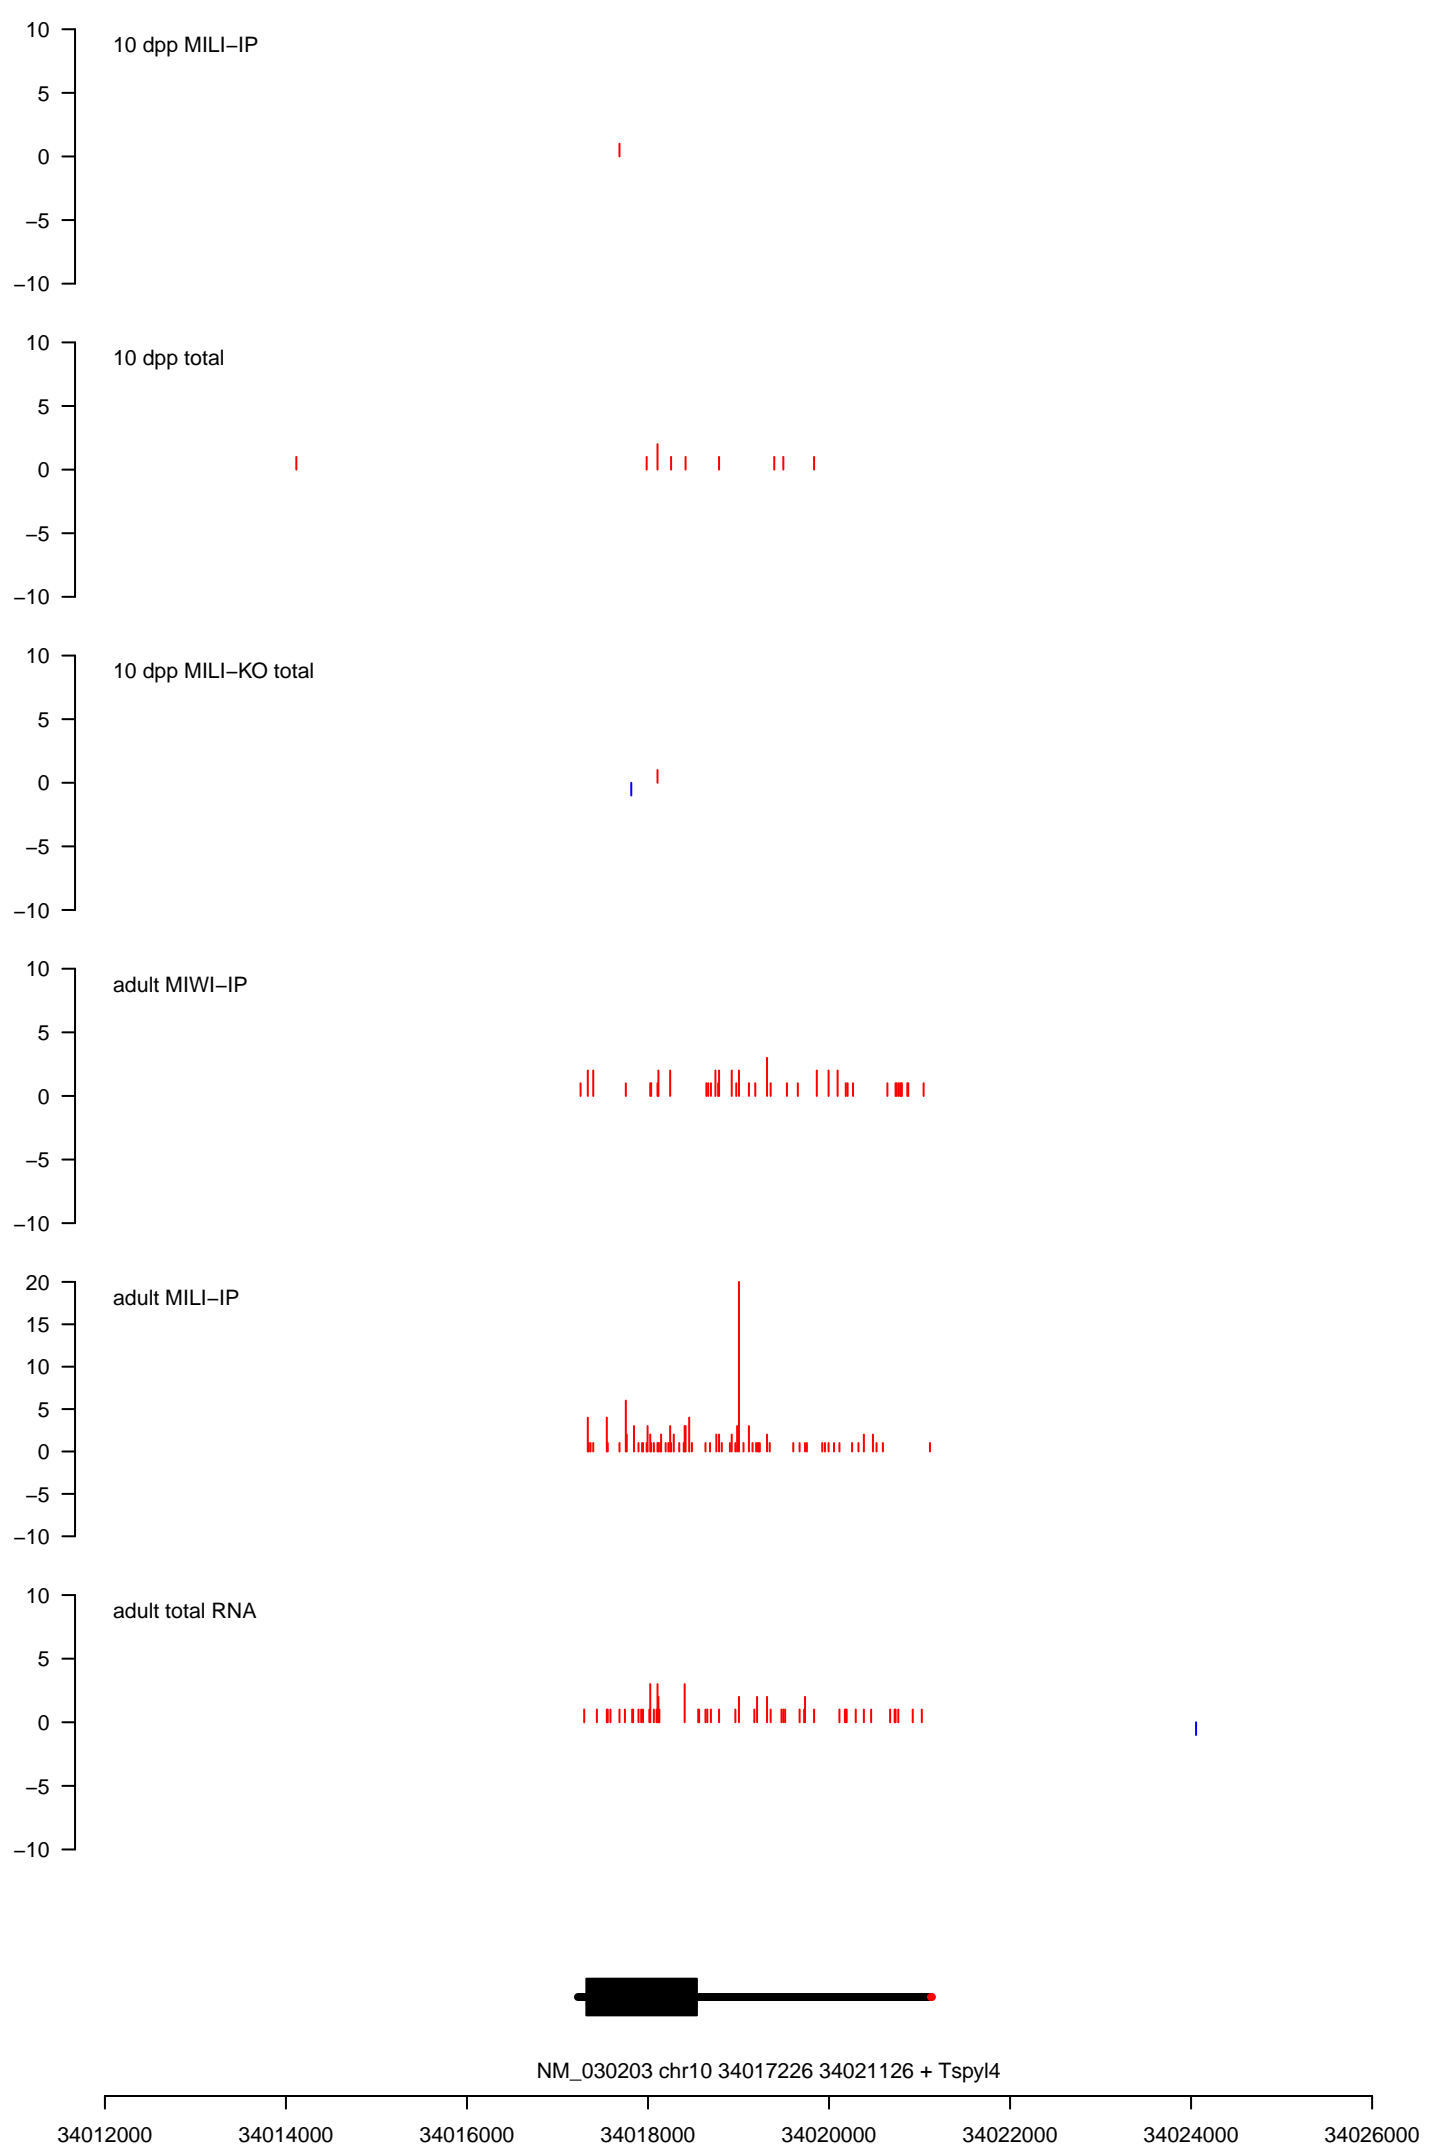

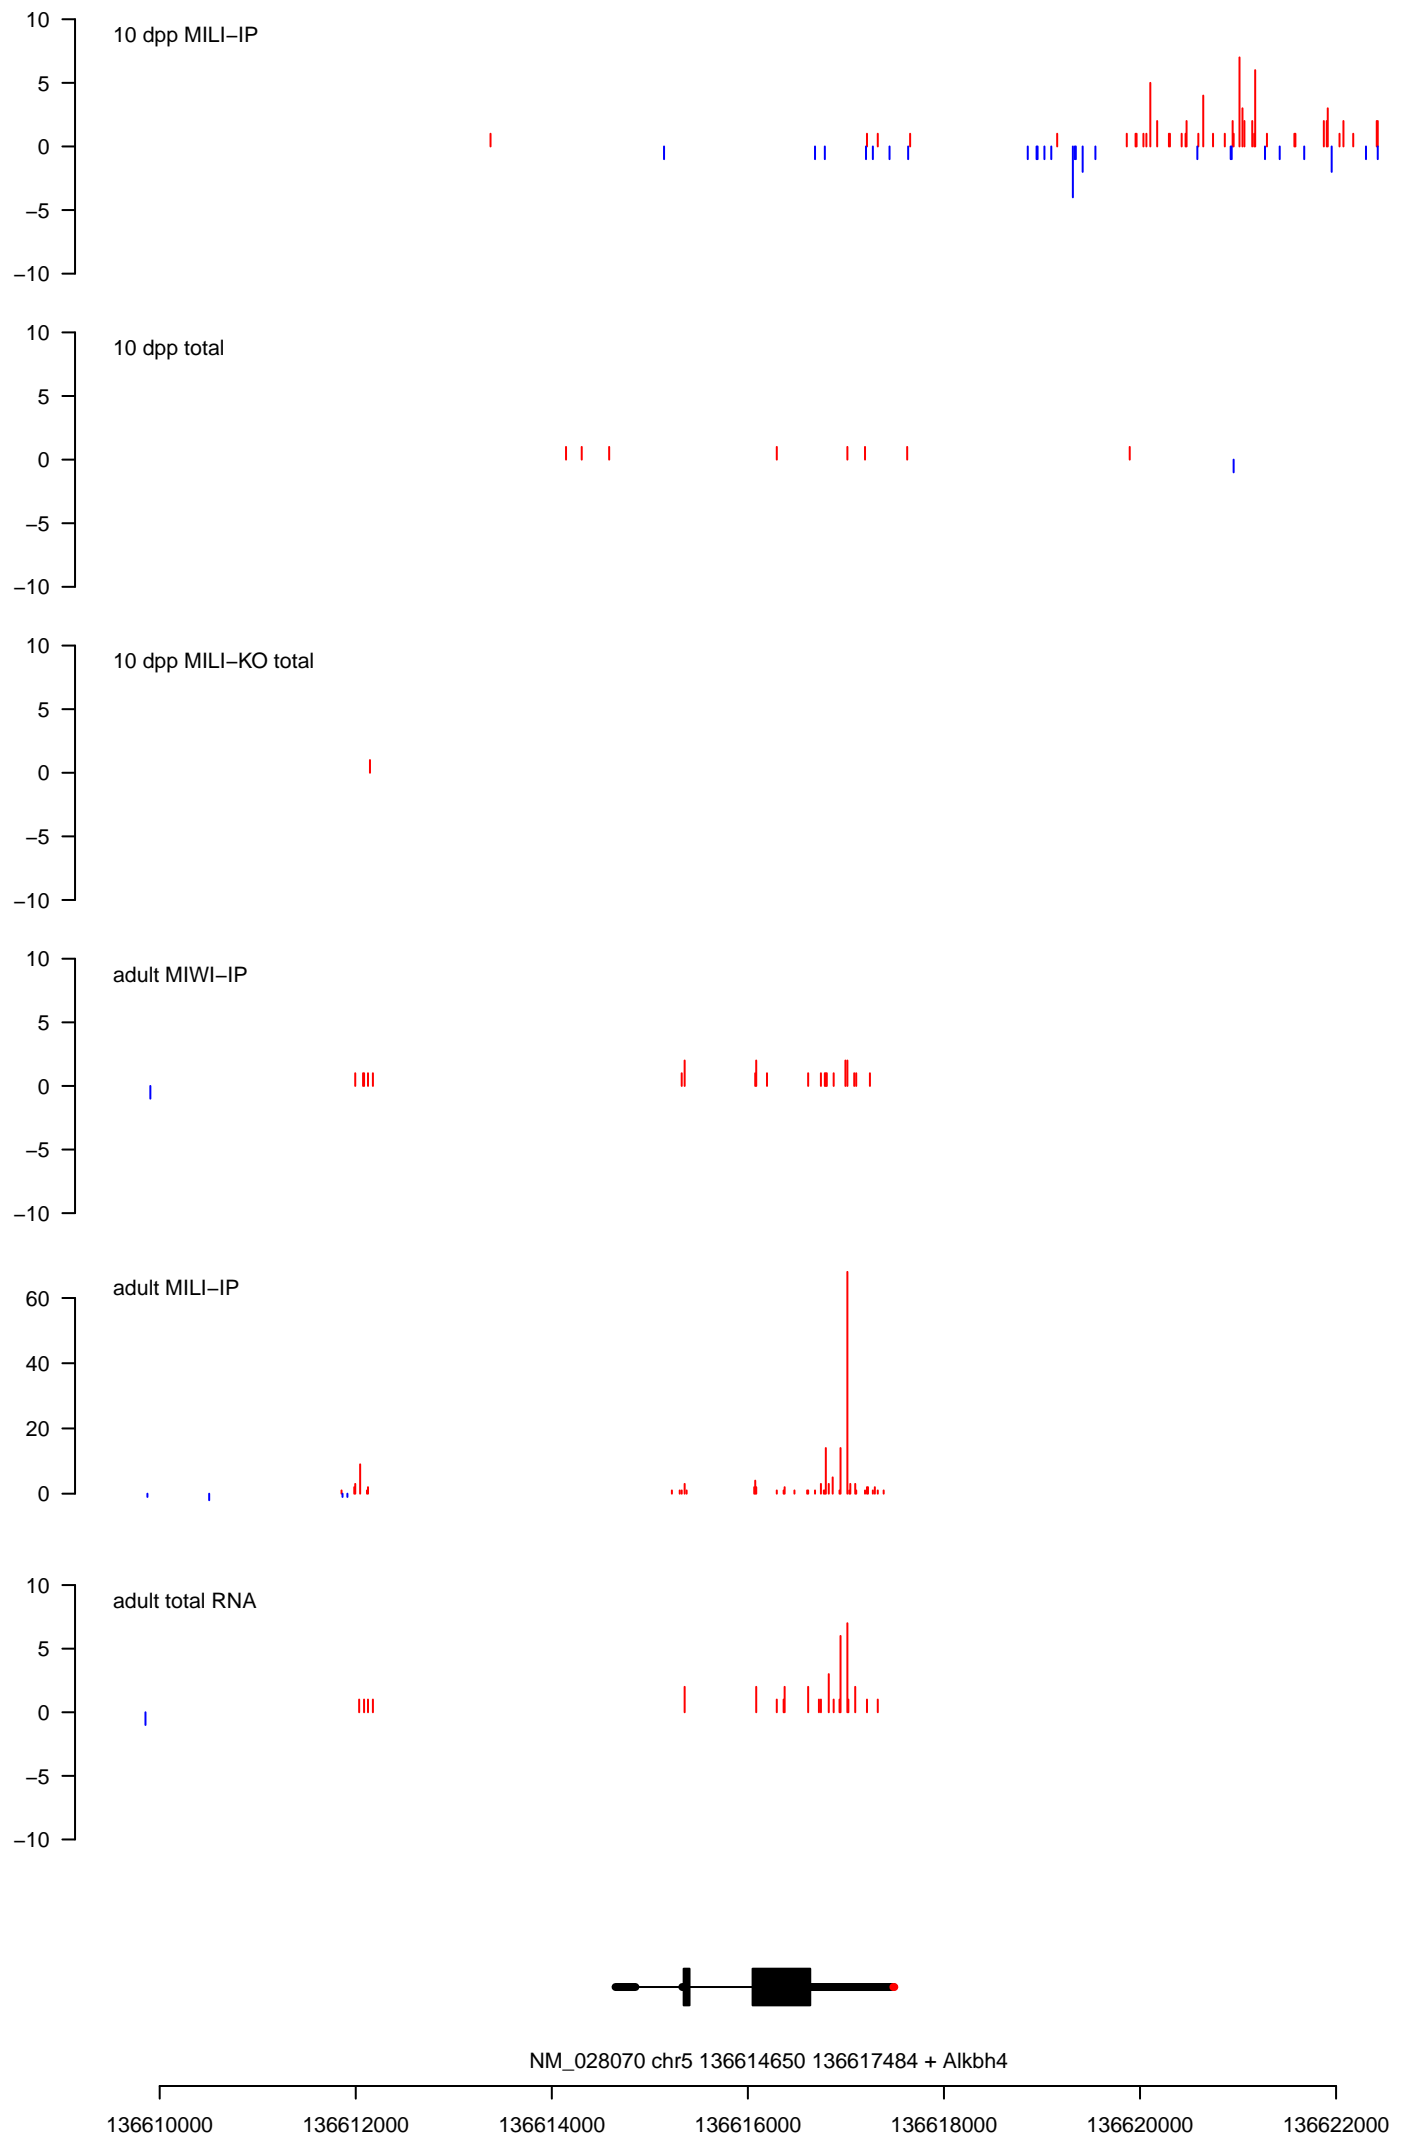

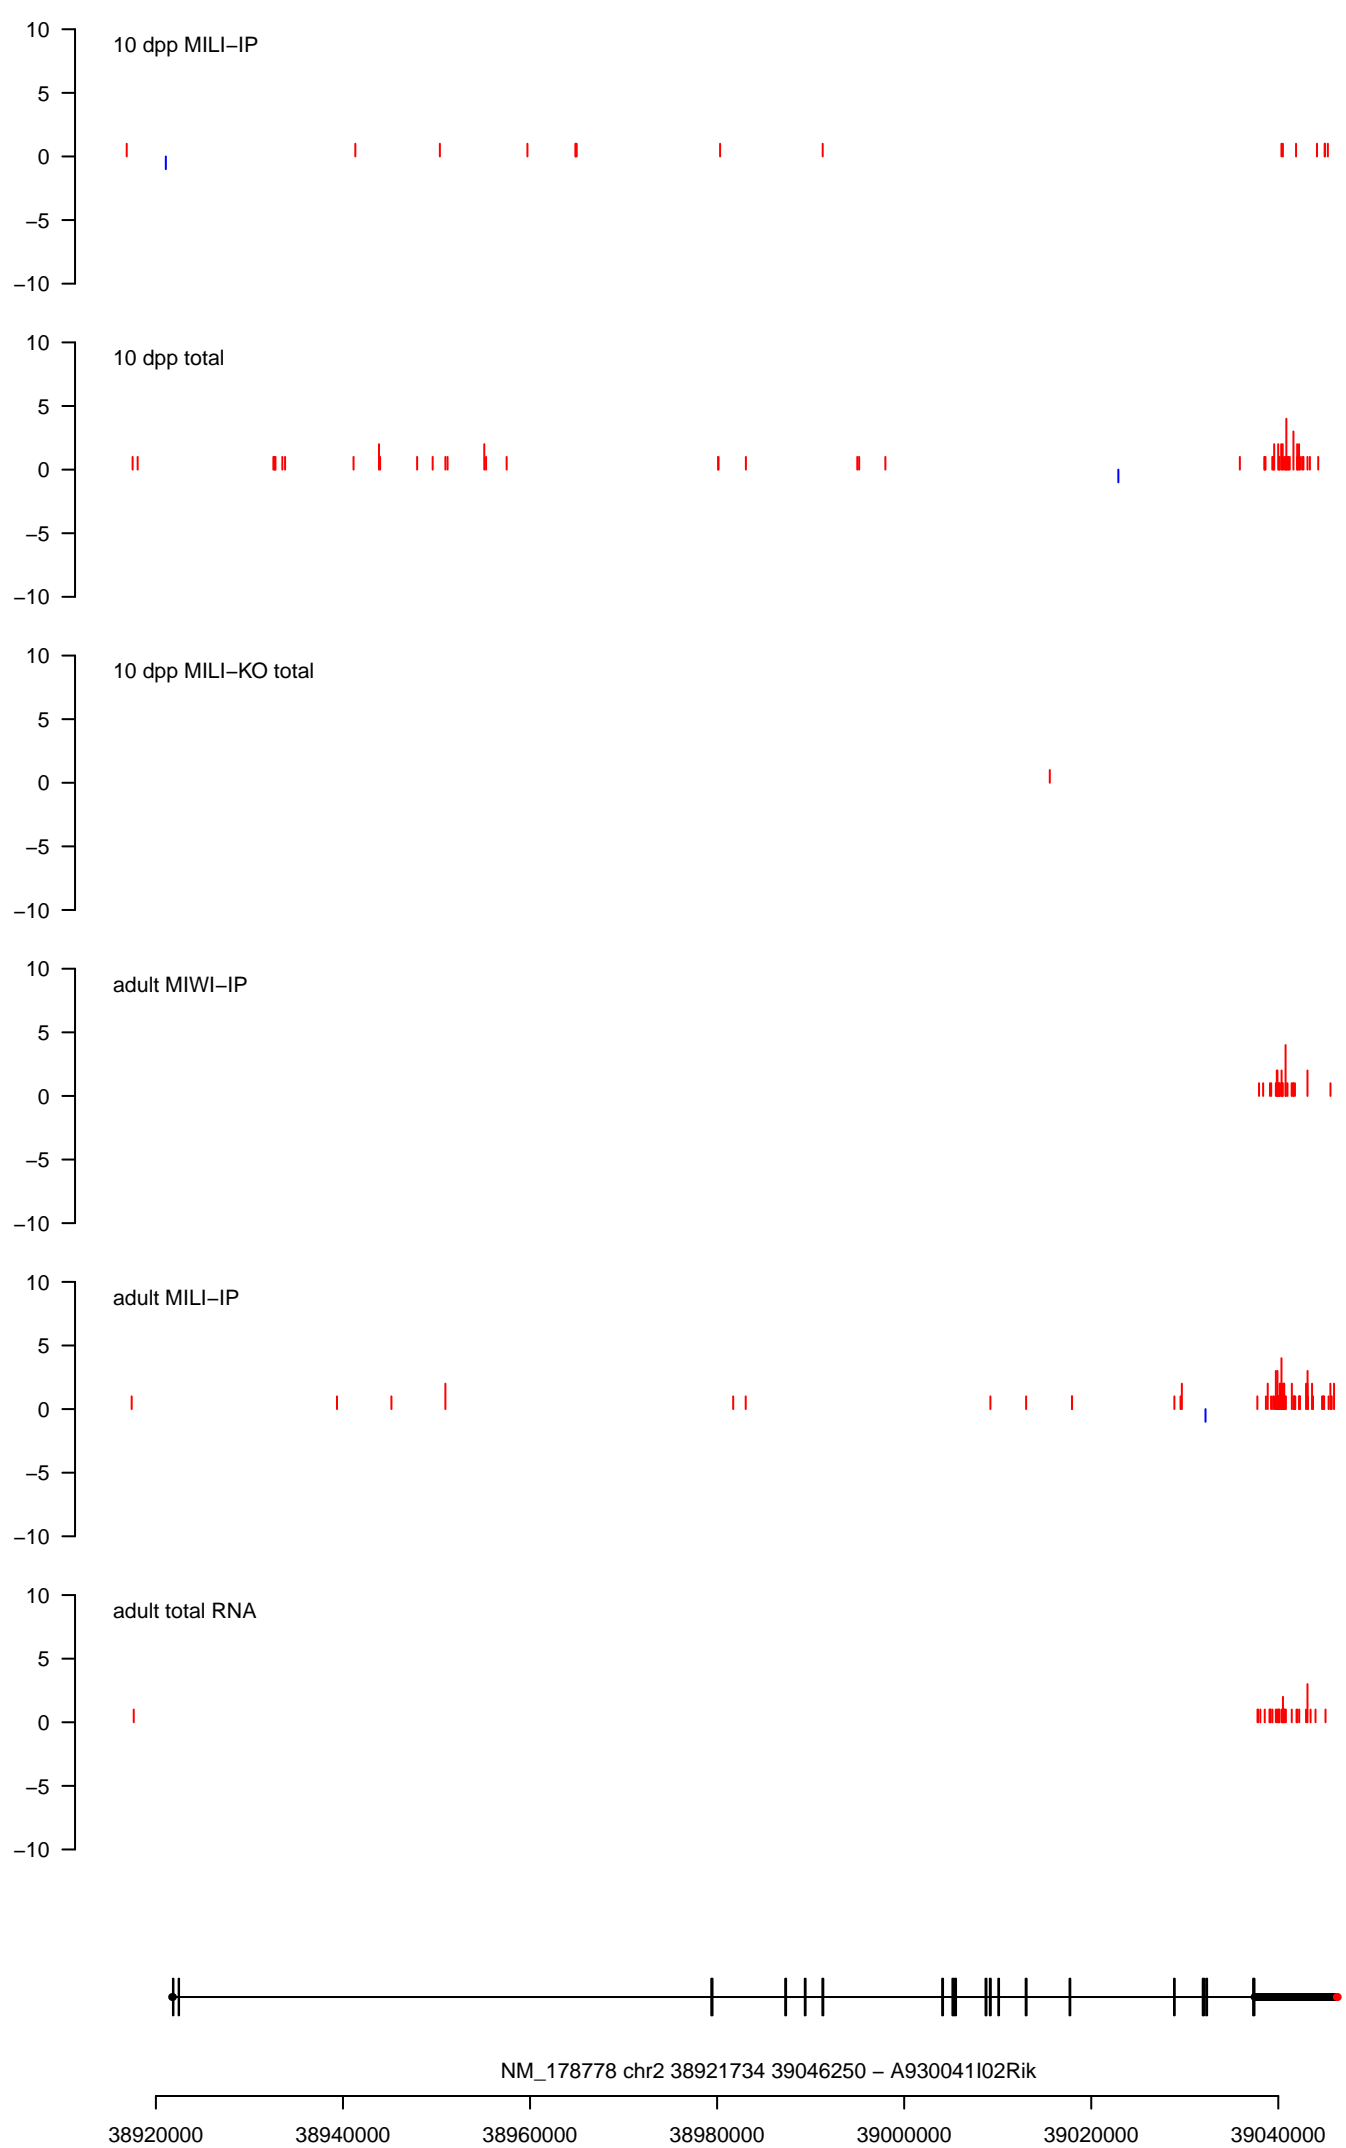

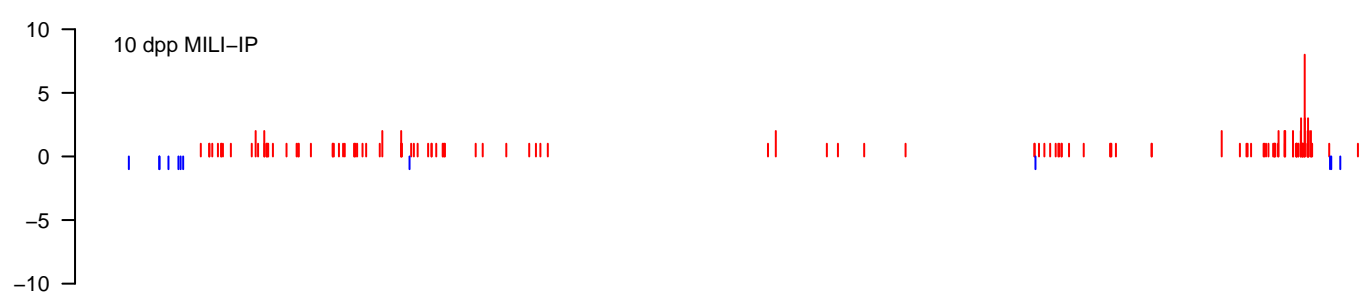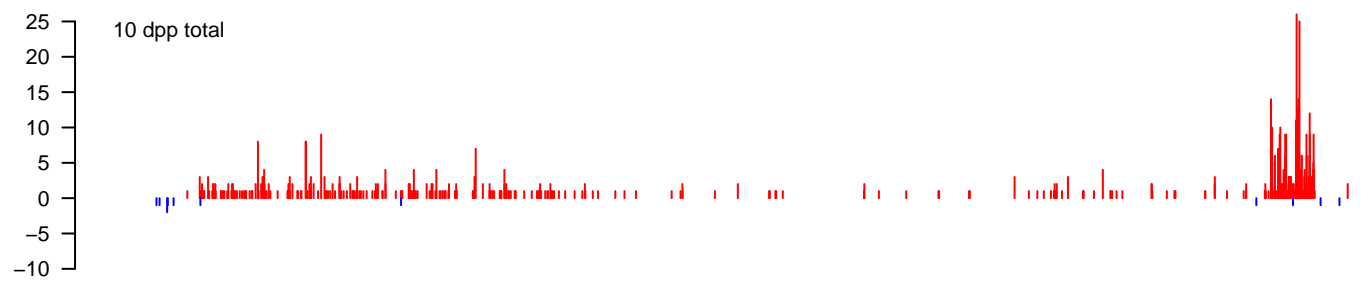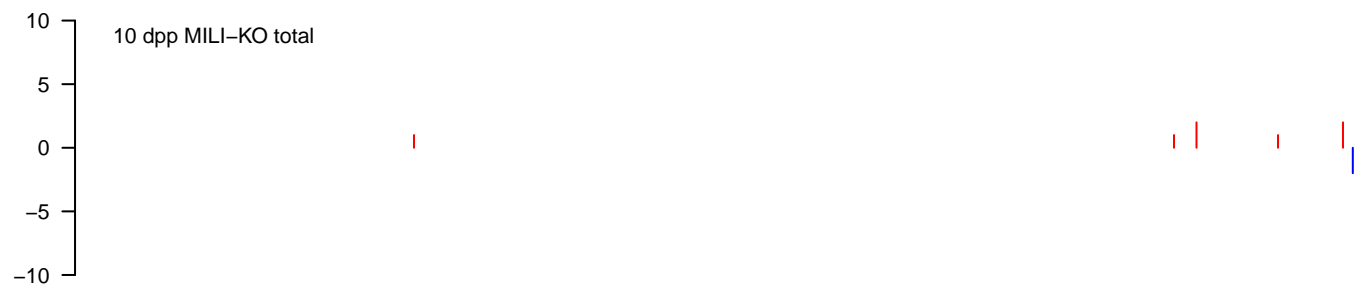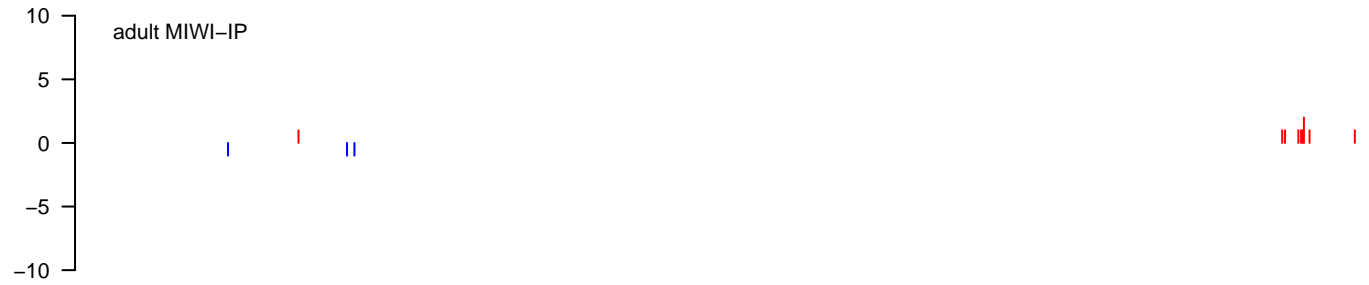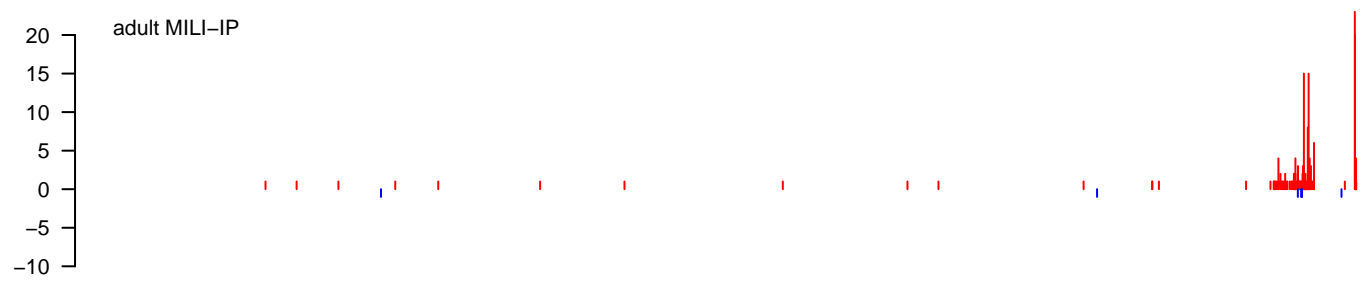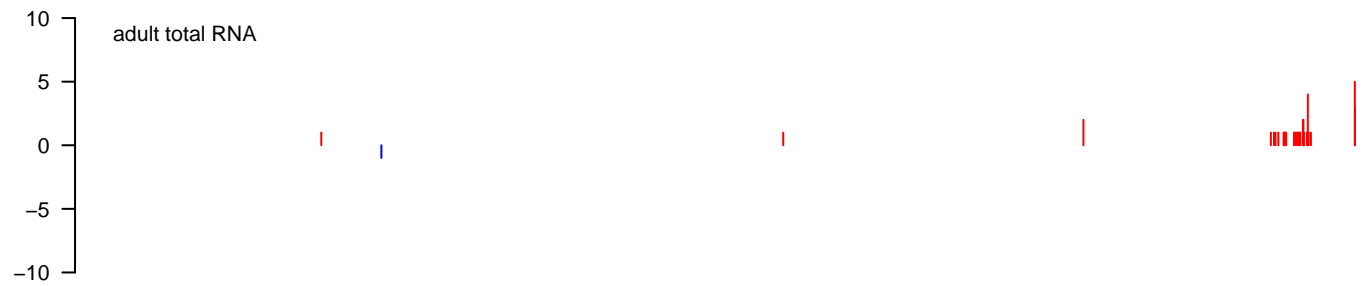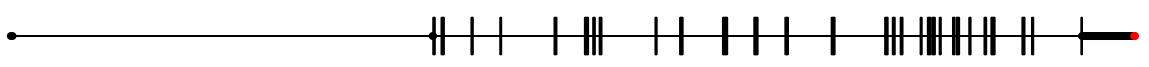

NM\_172661 chr2 32006676 32090044 + Bat2l

32000000 32020000 32040000 32060000 32080000

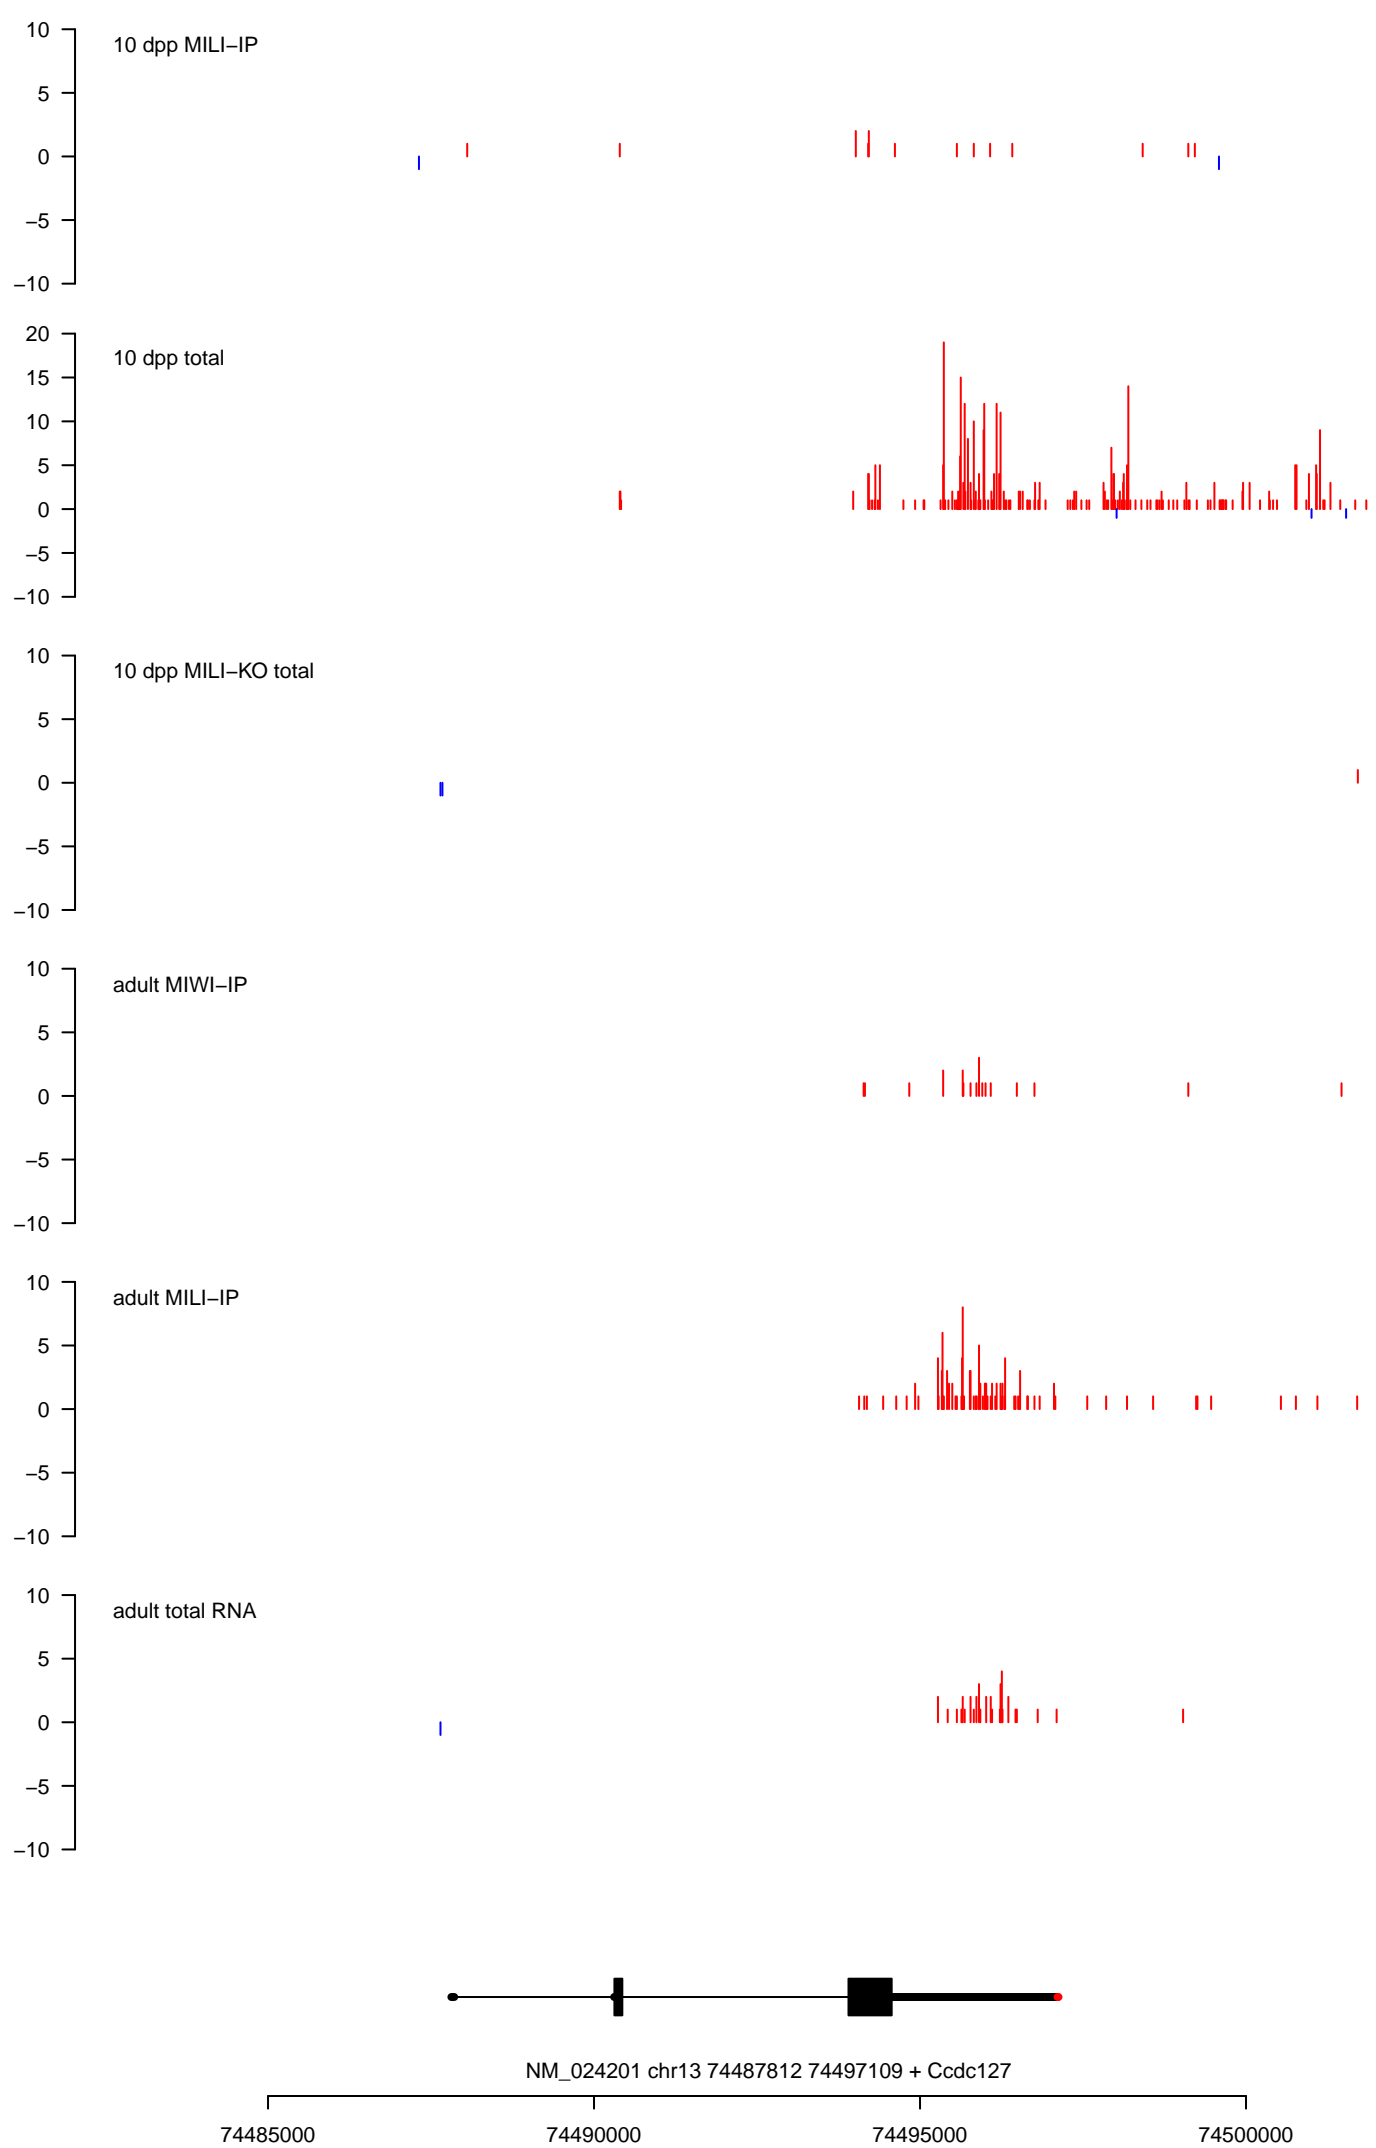



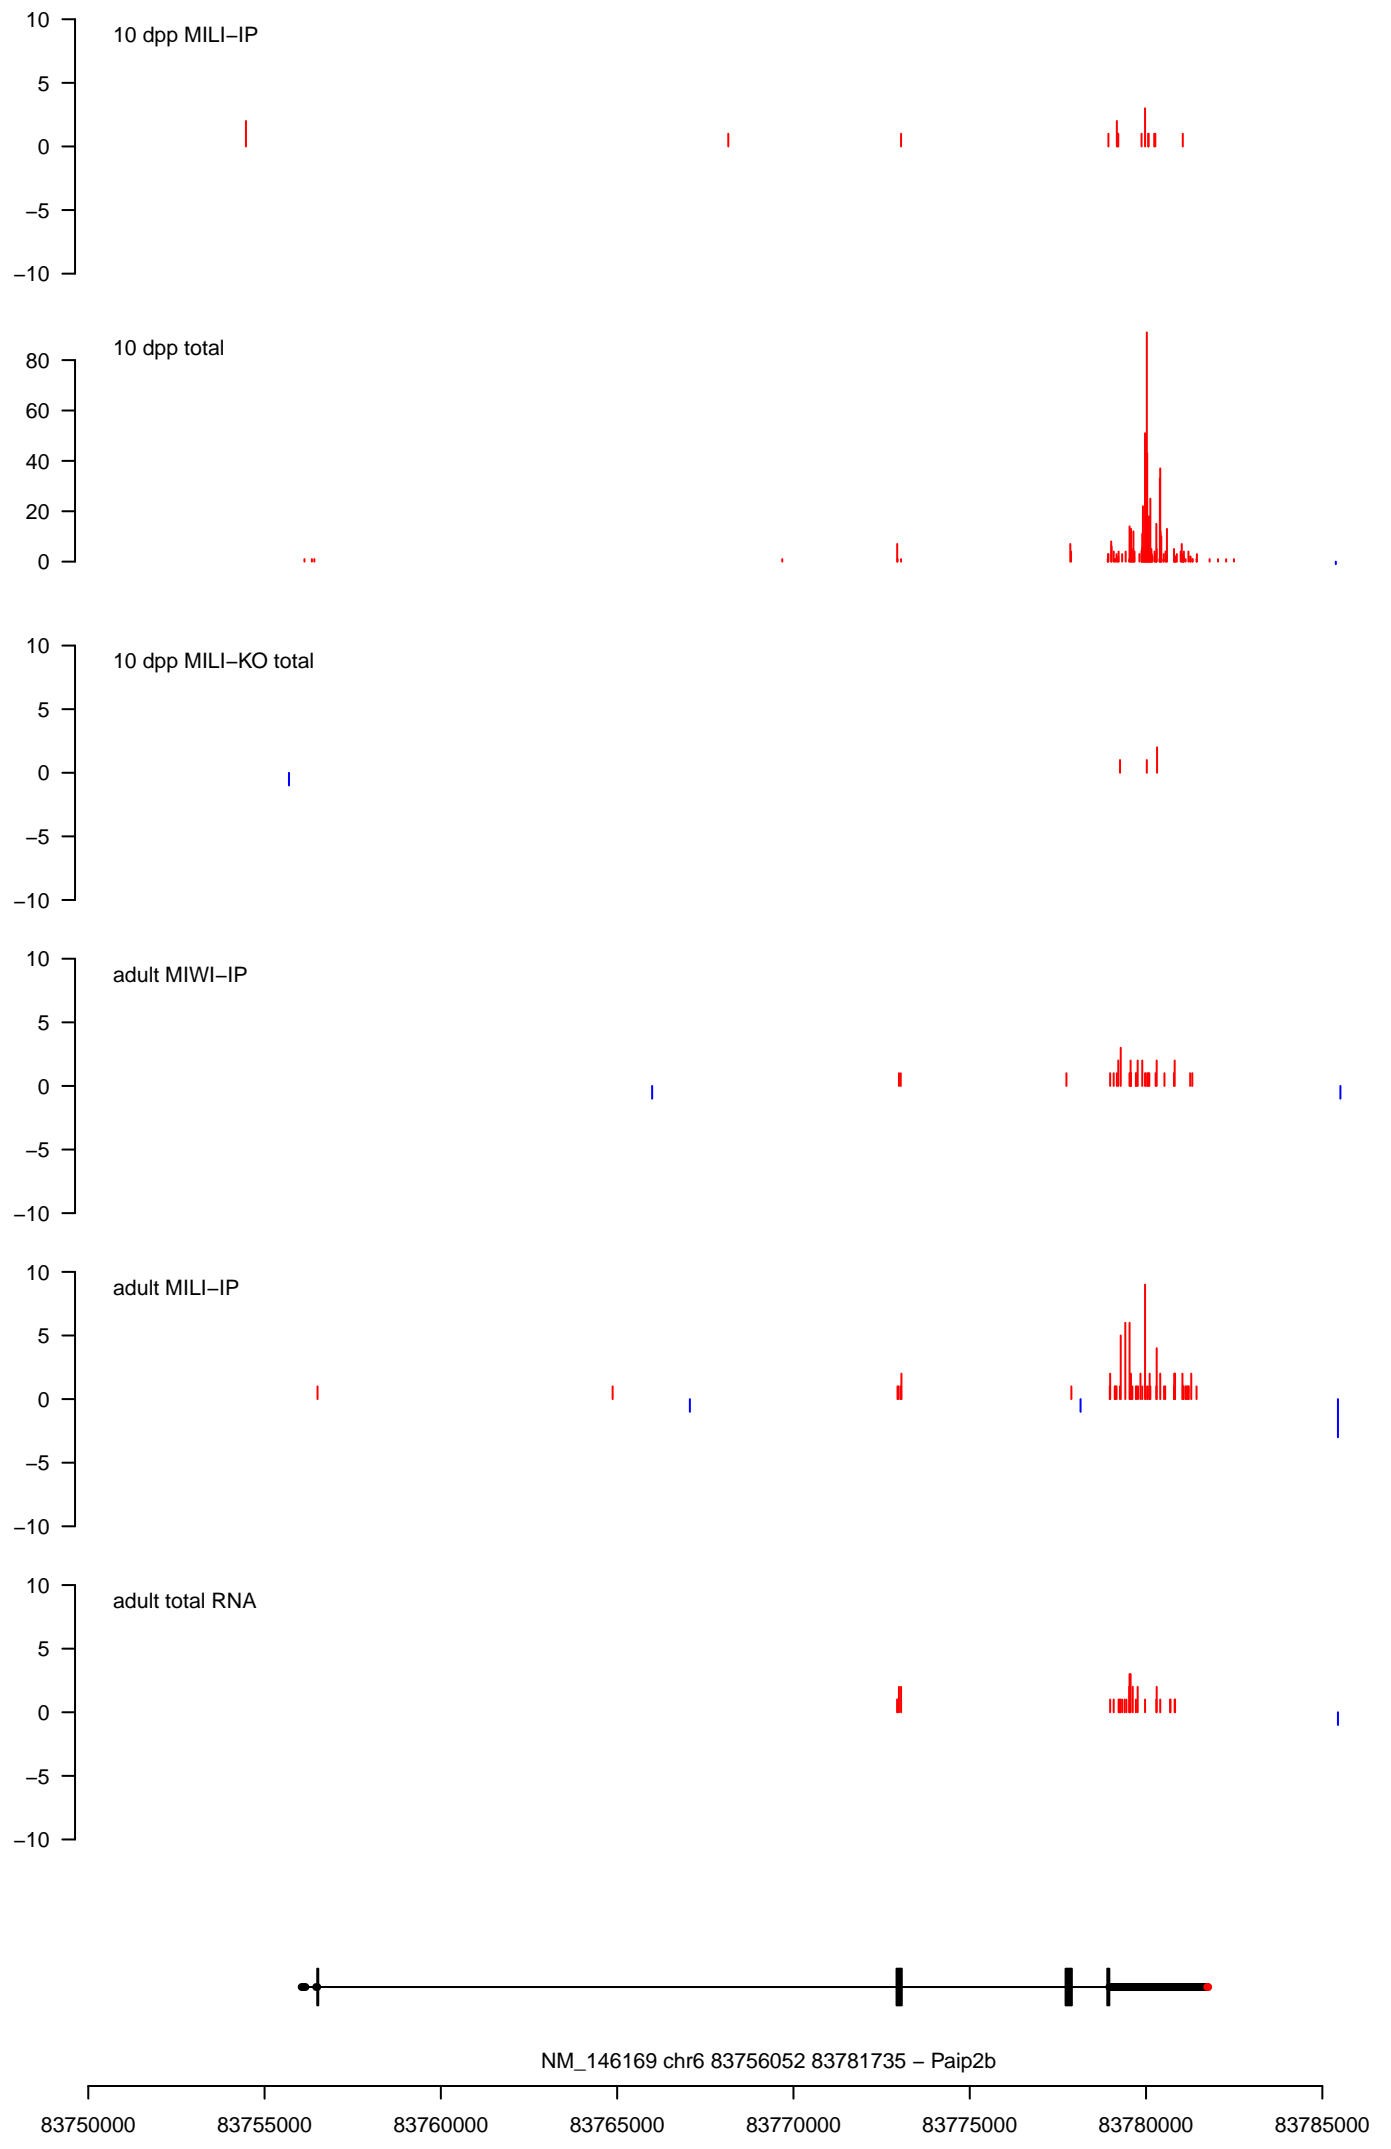

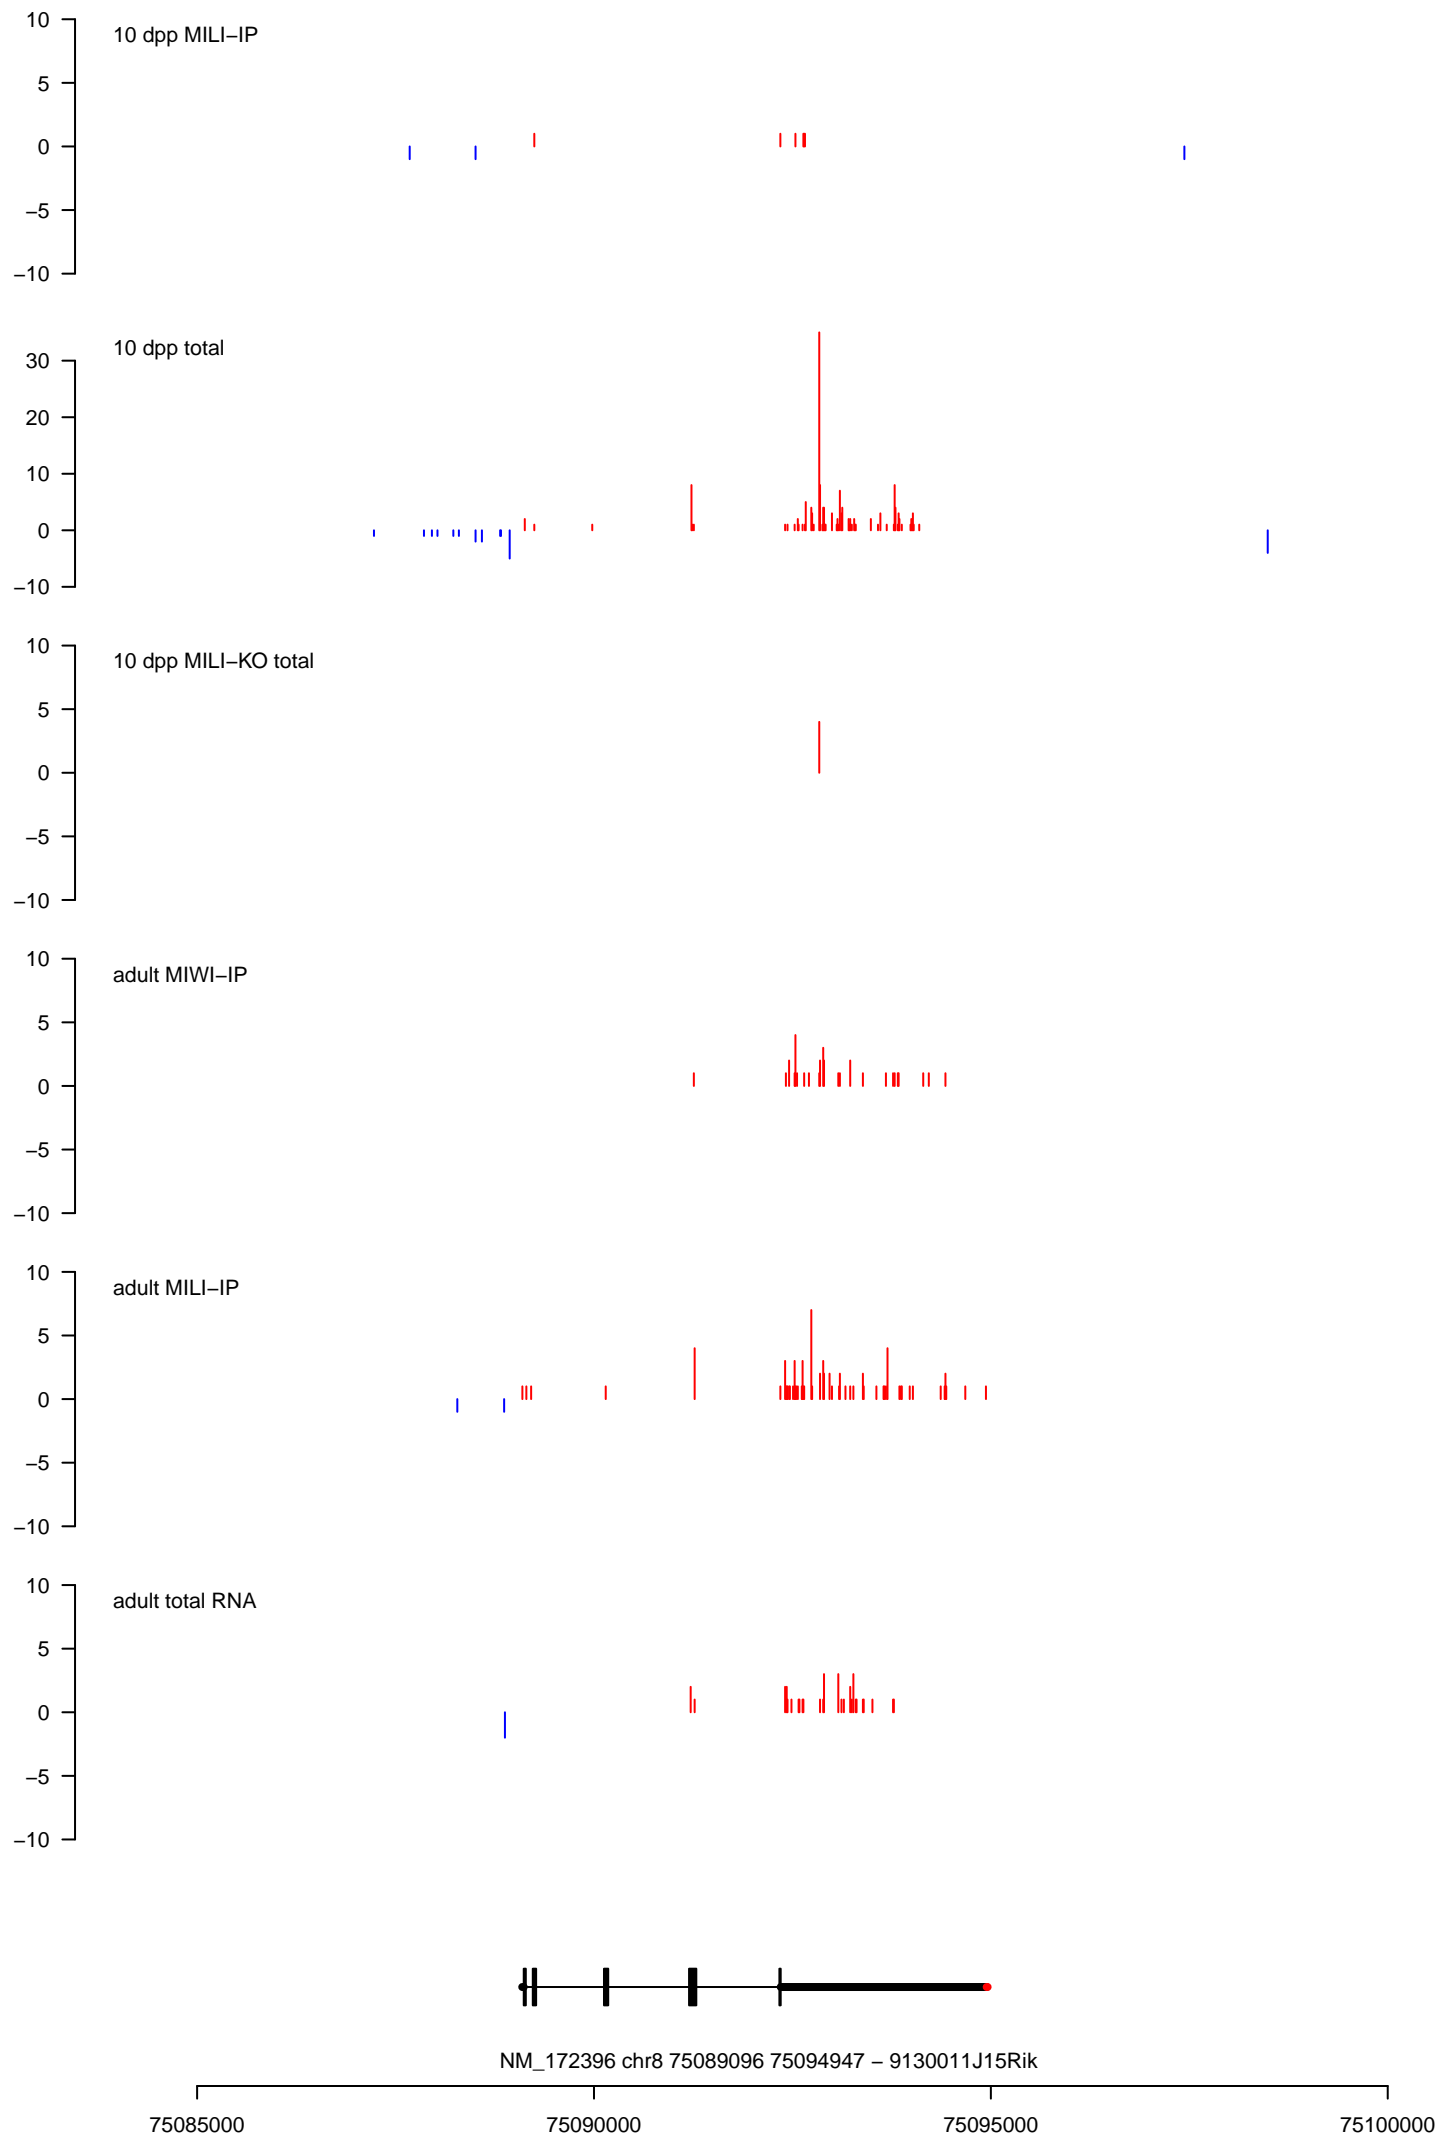

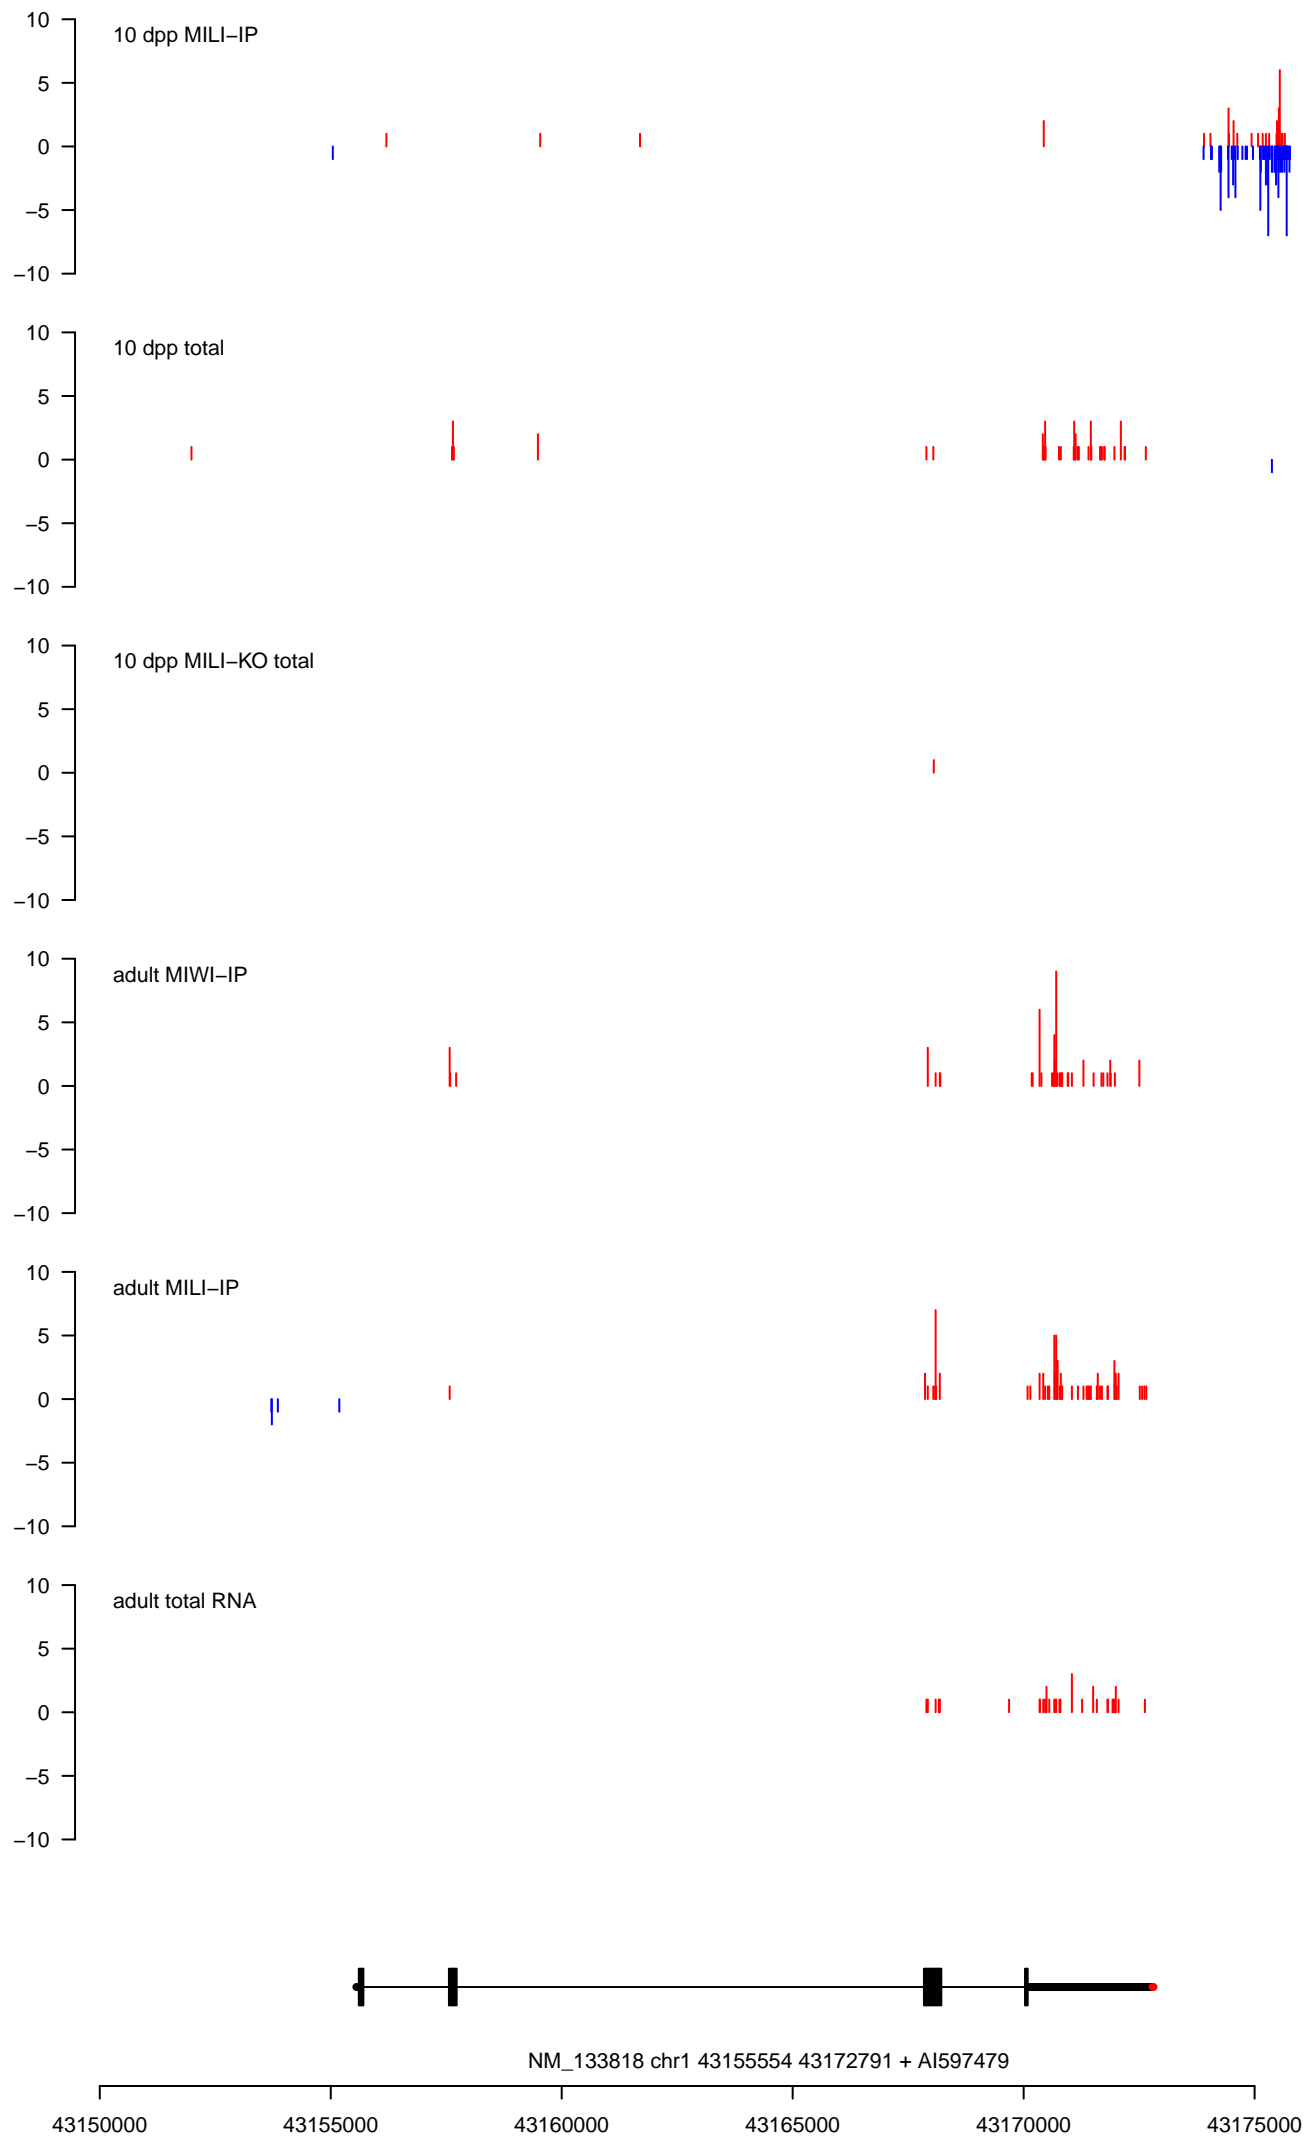

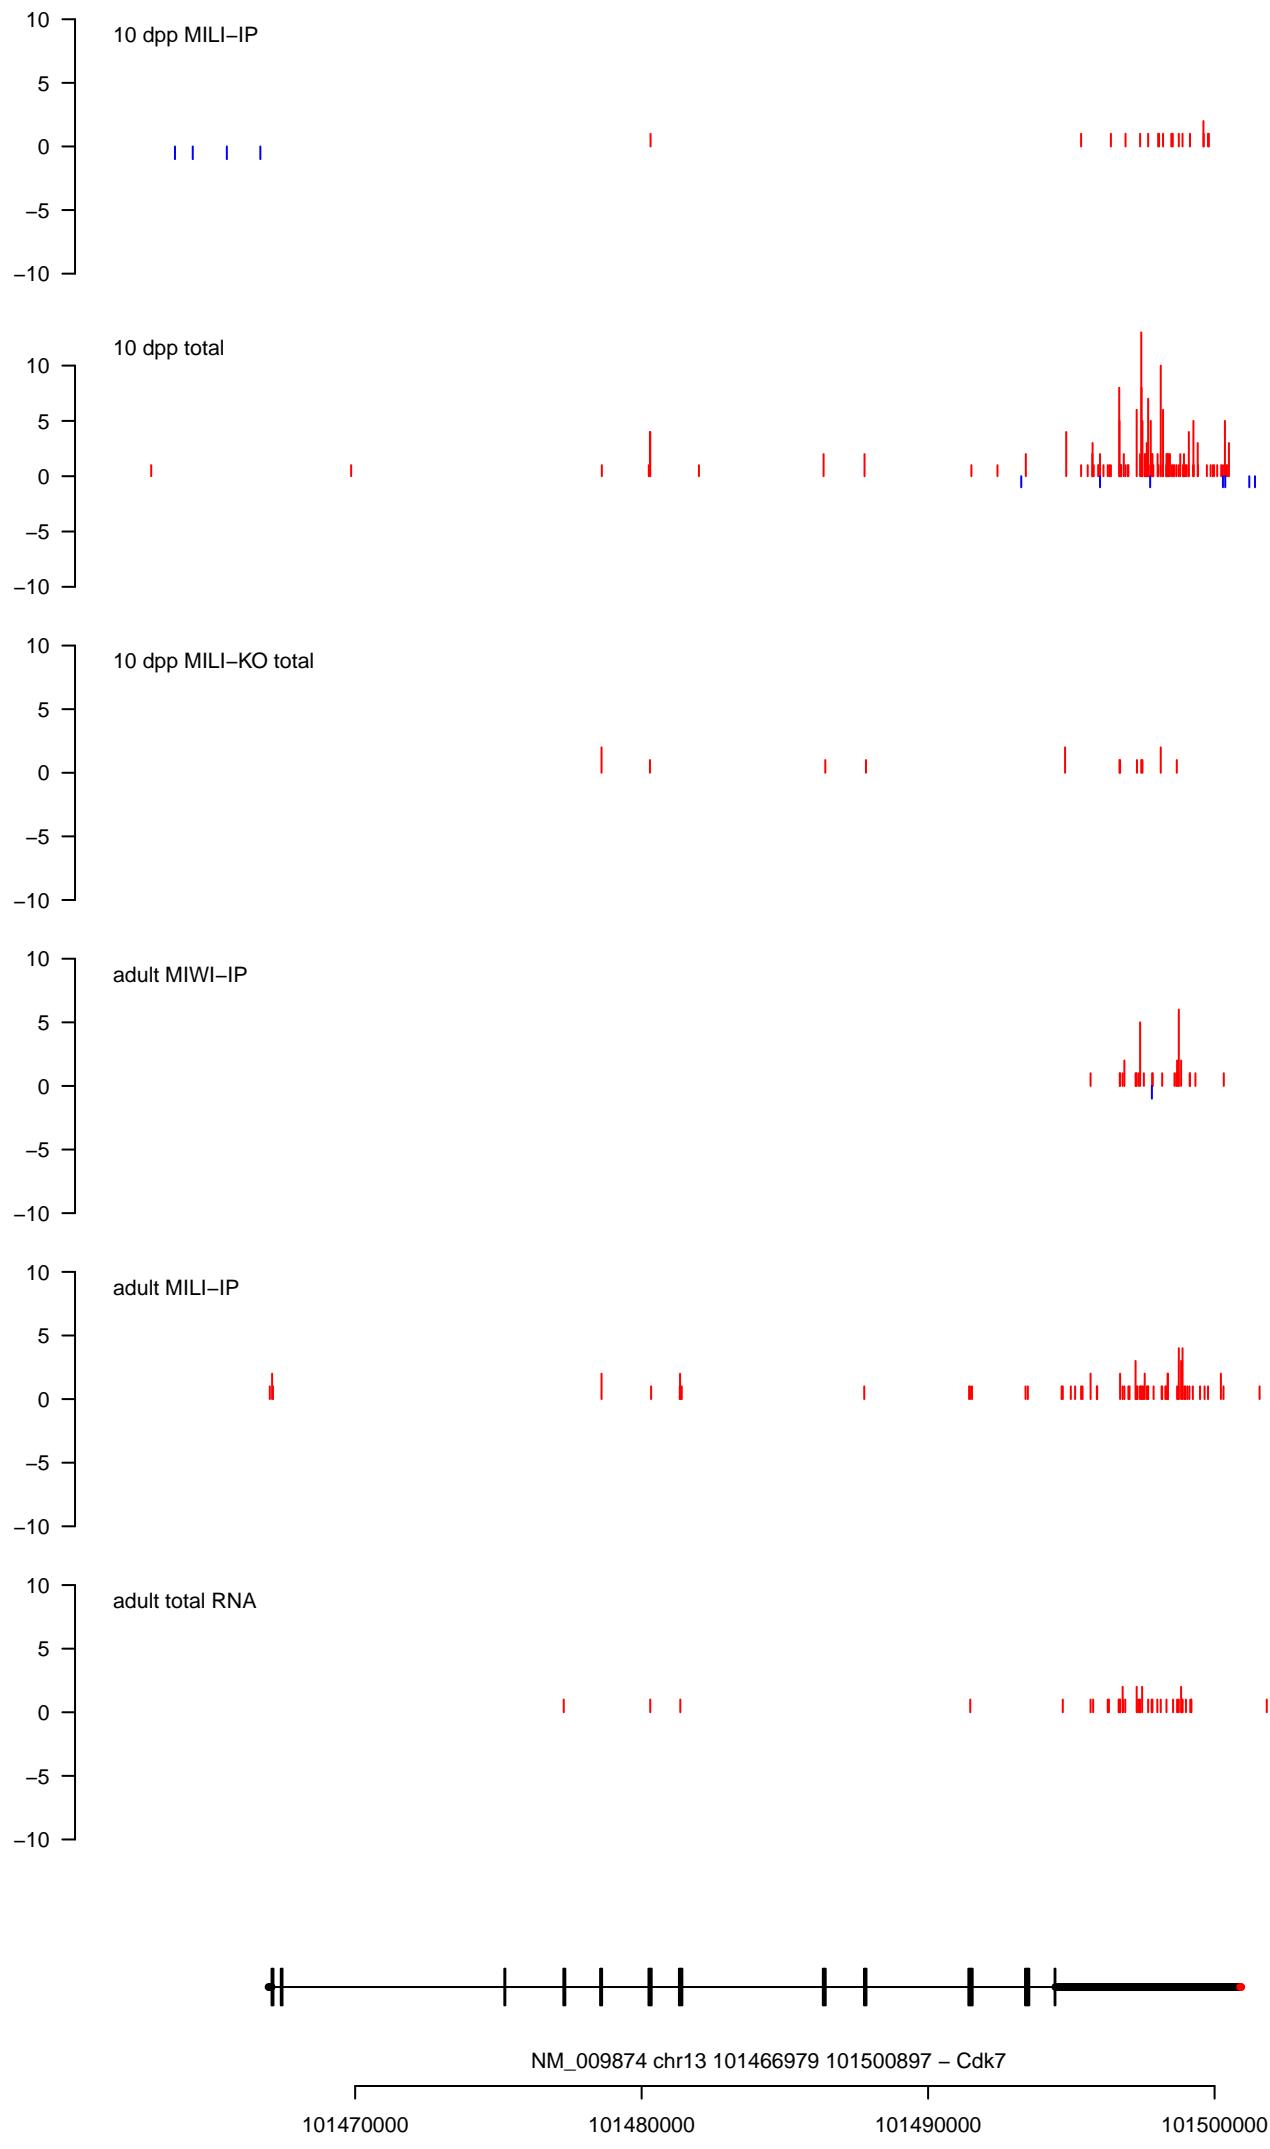

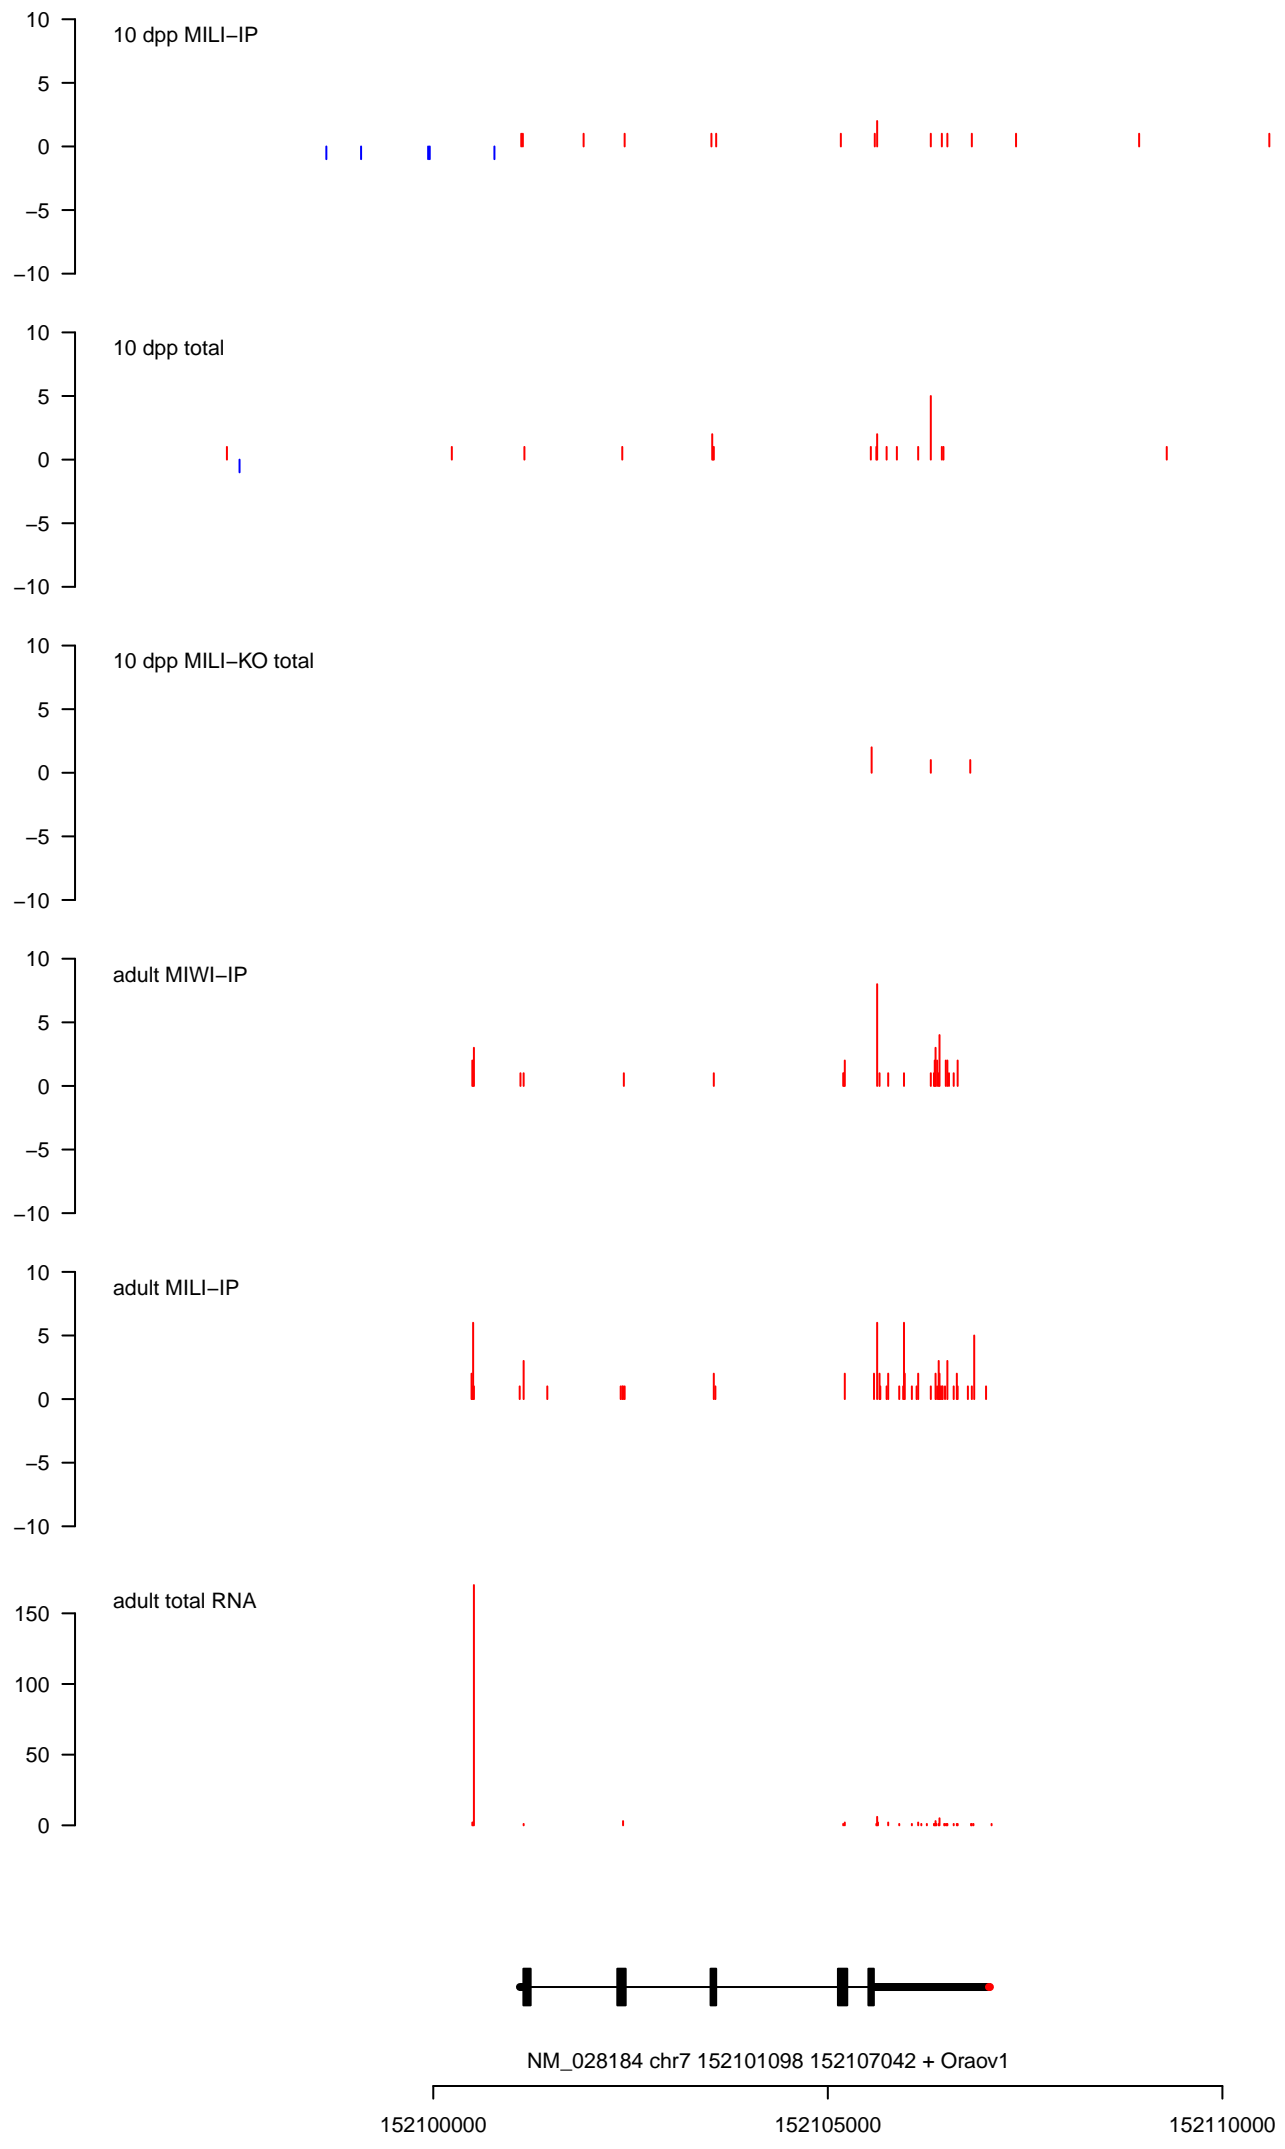

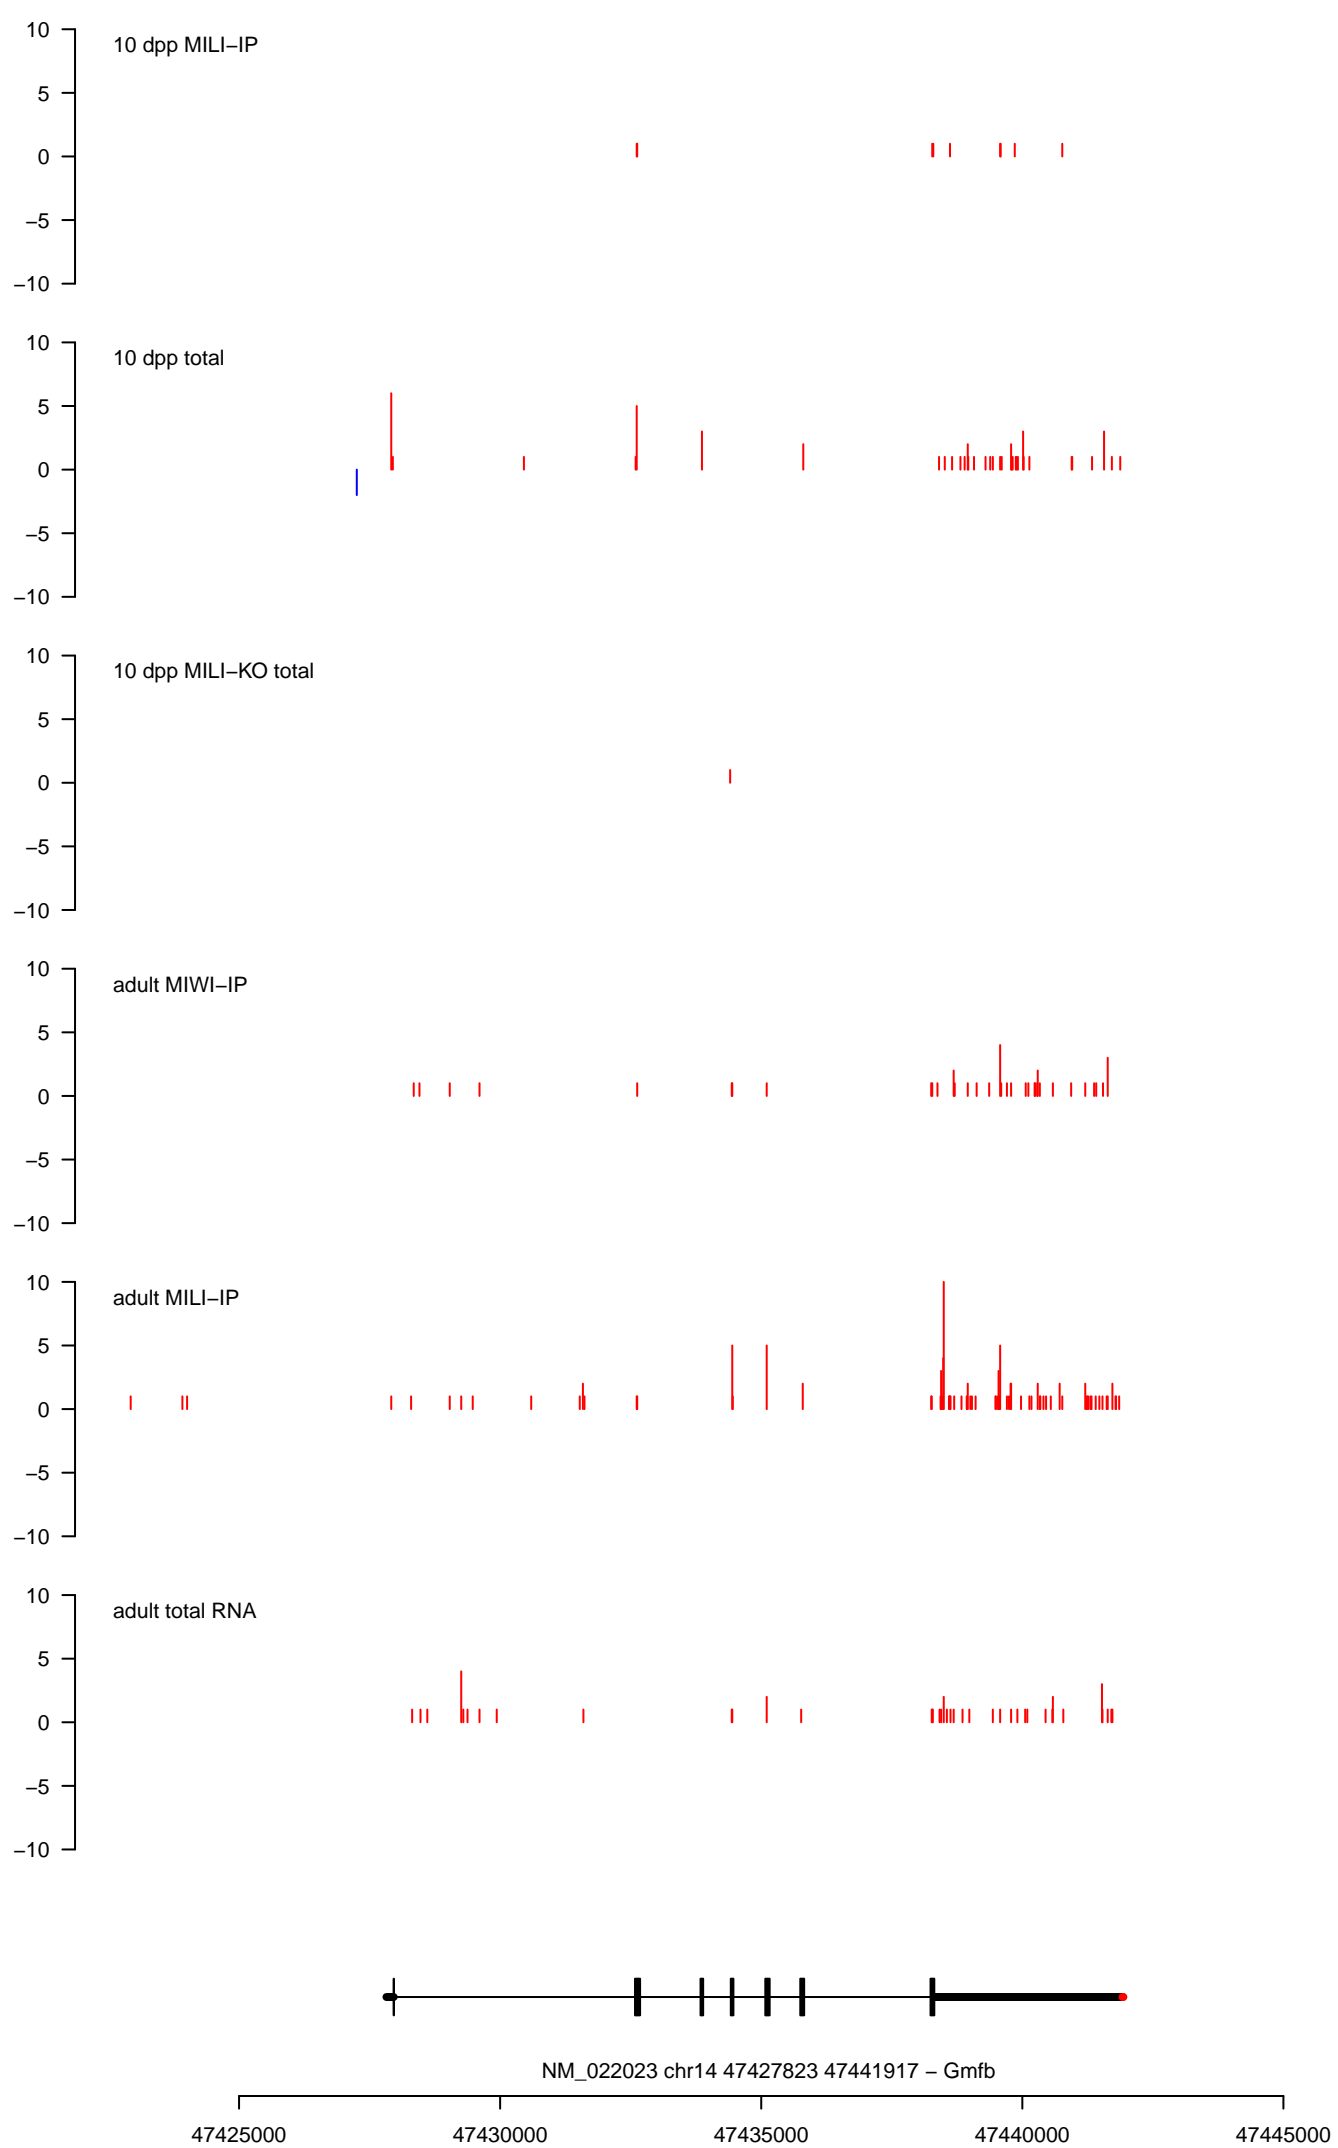

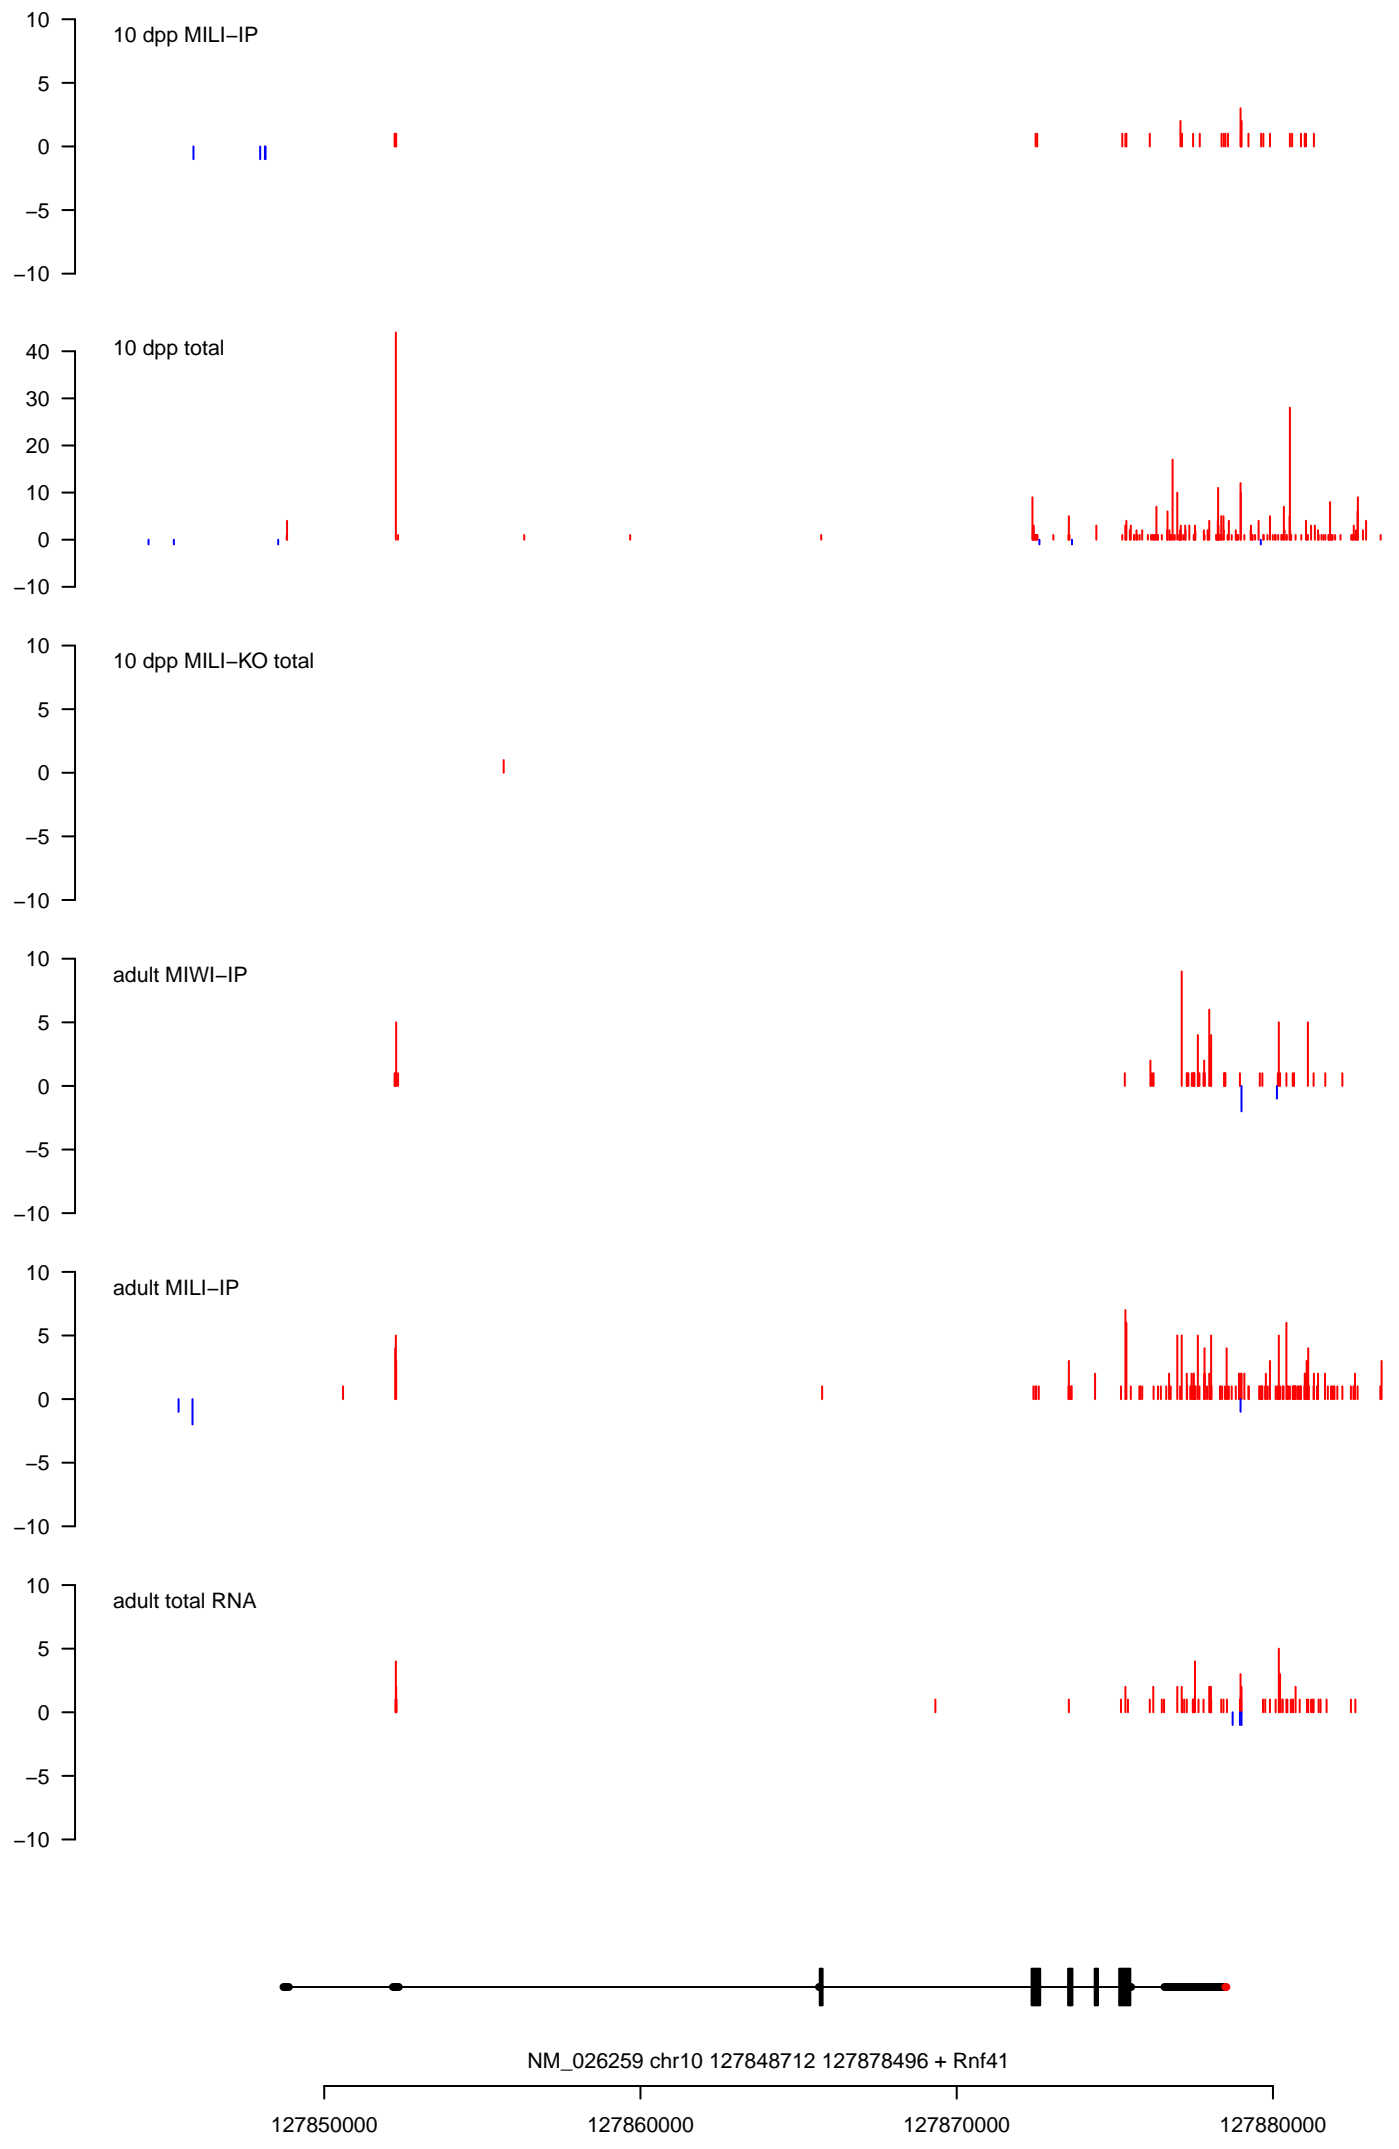

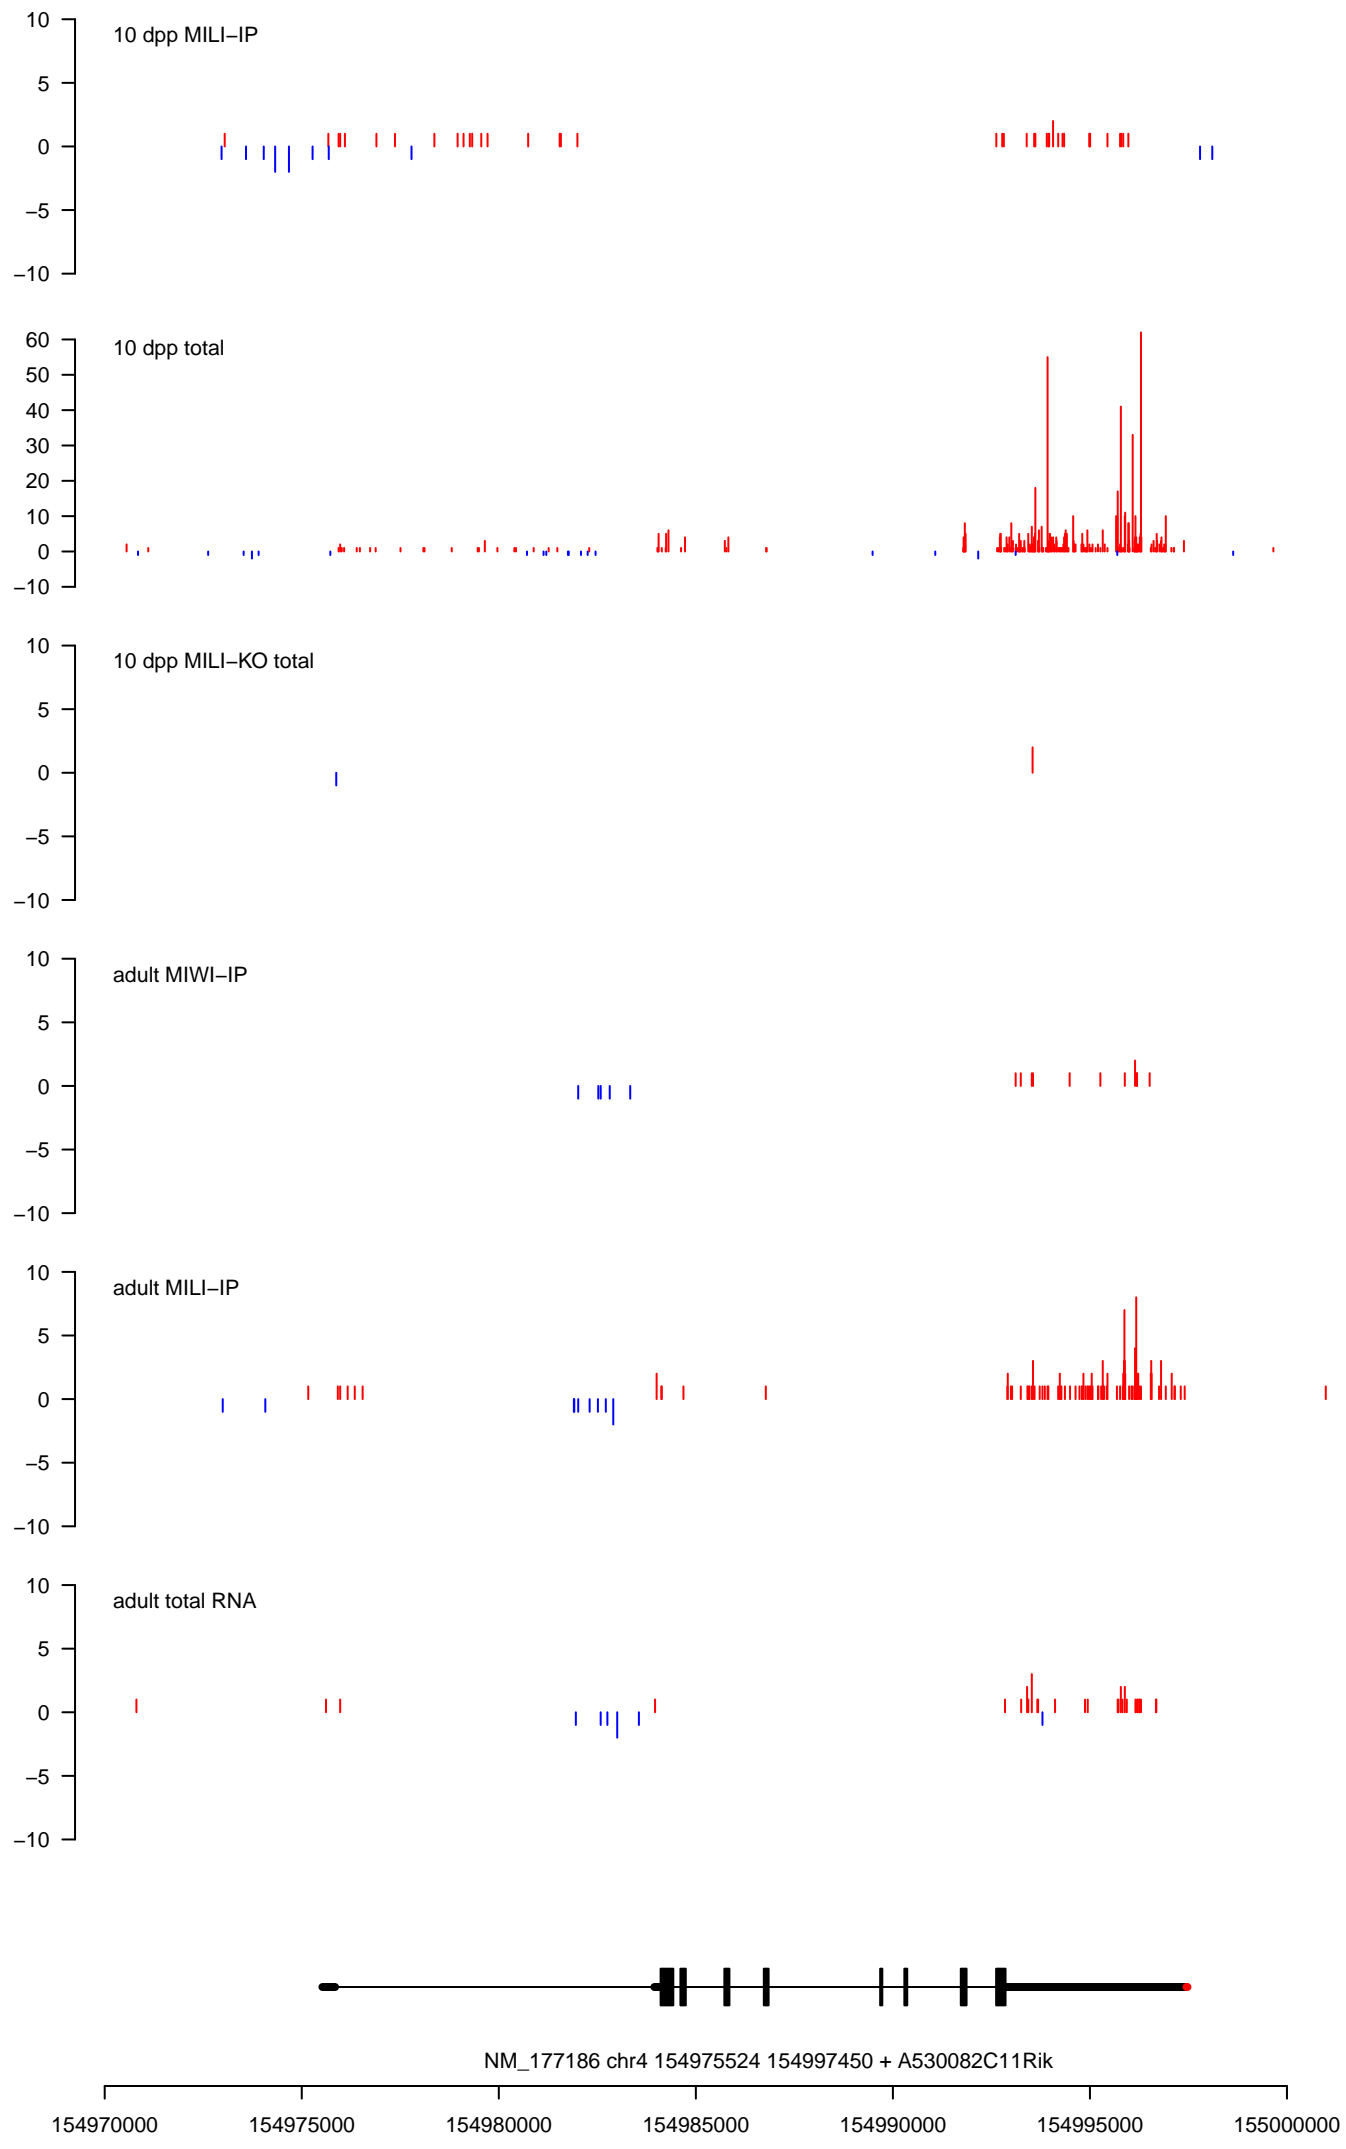



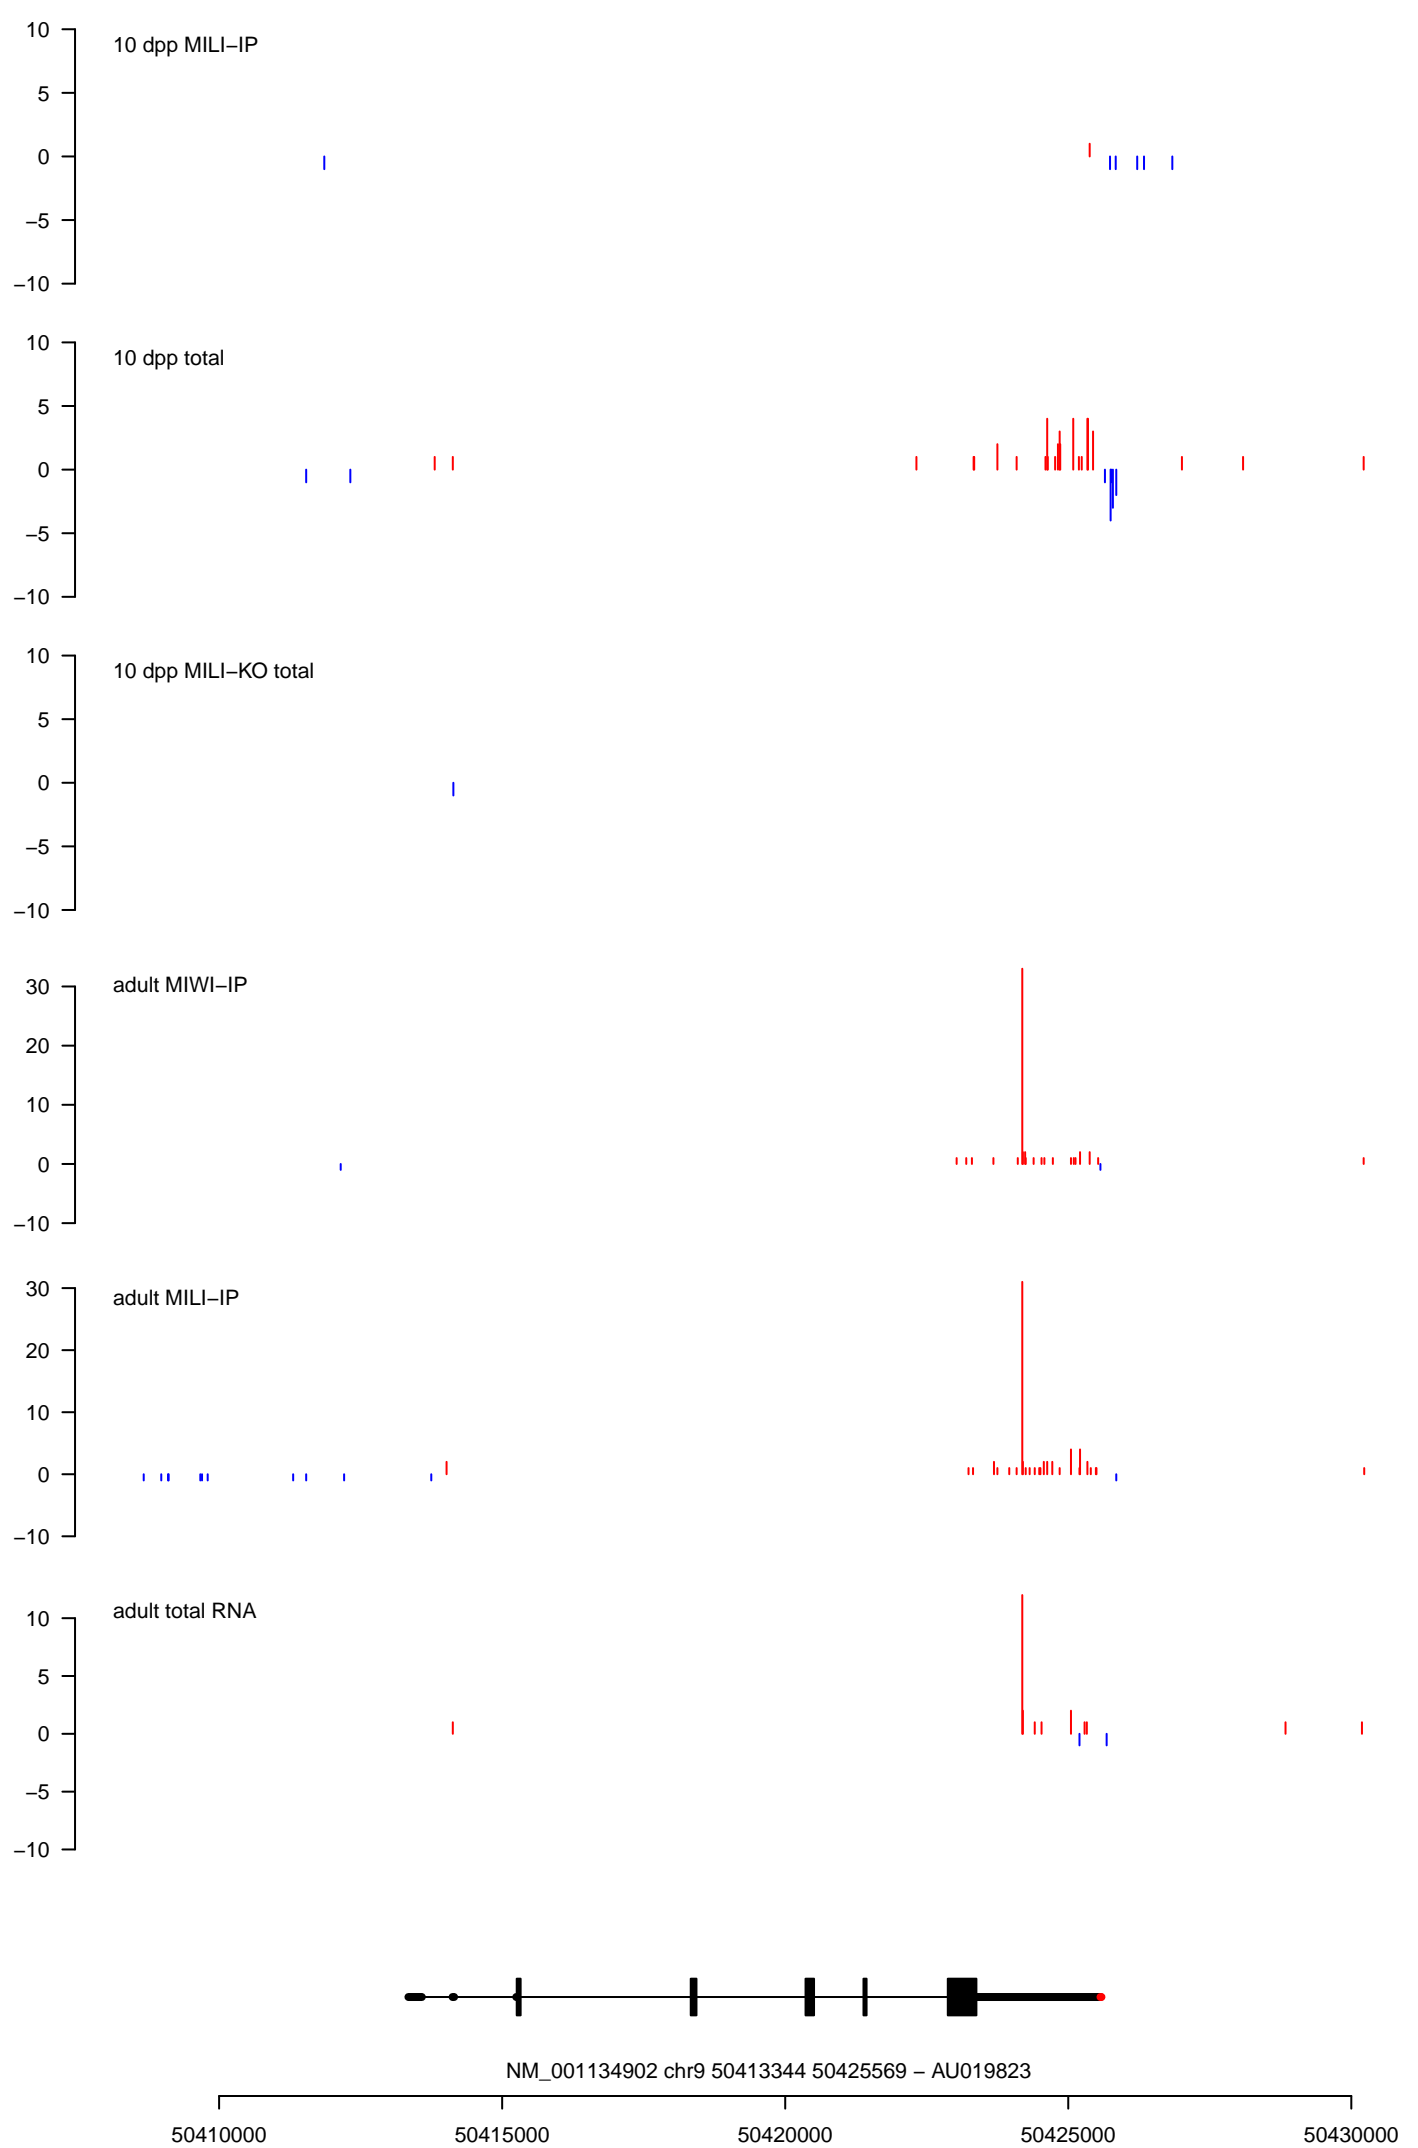

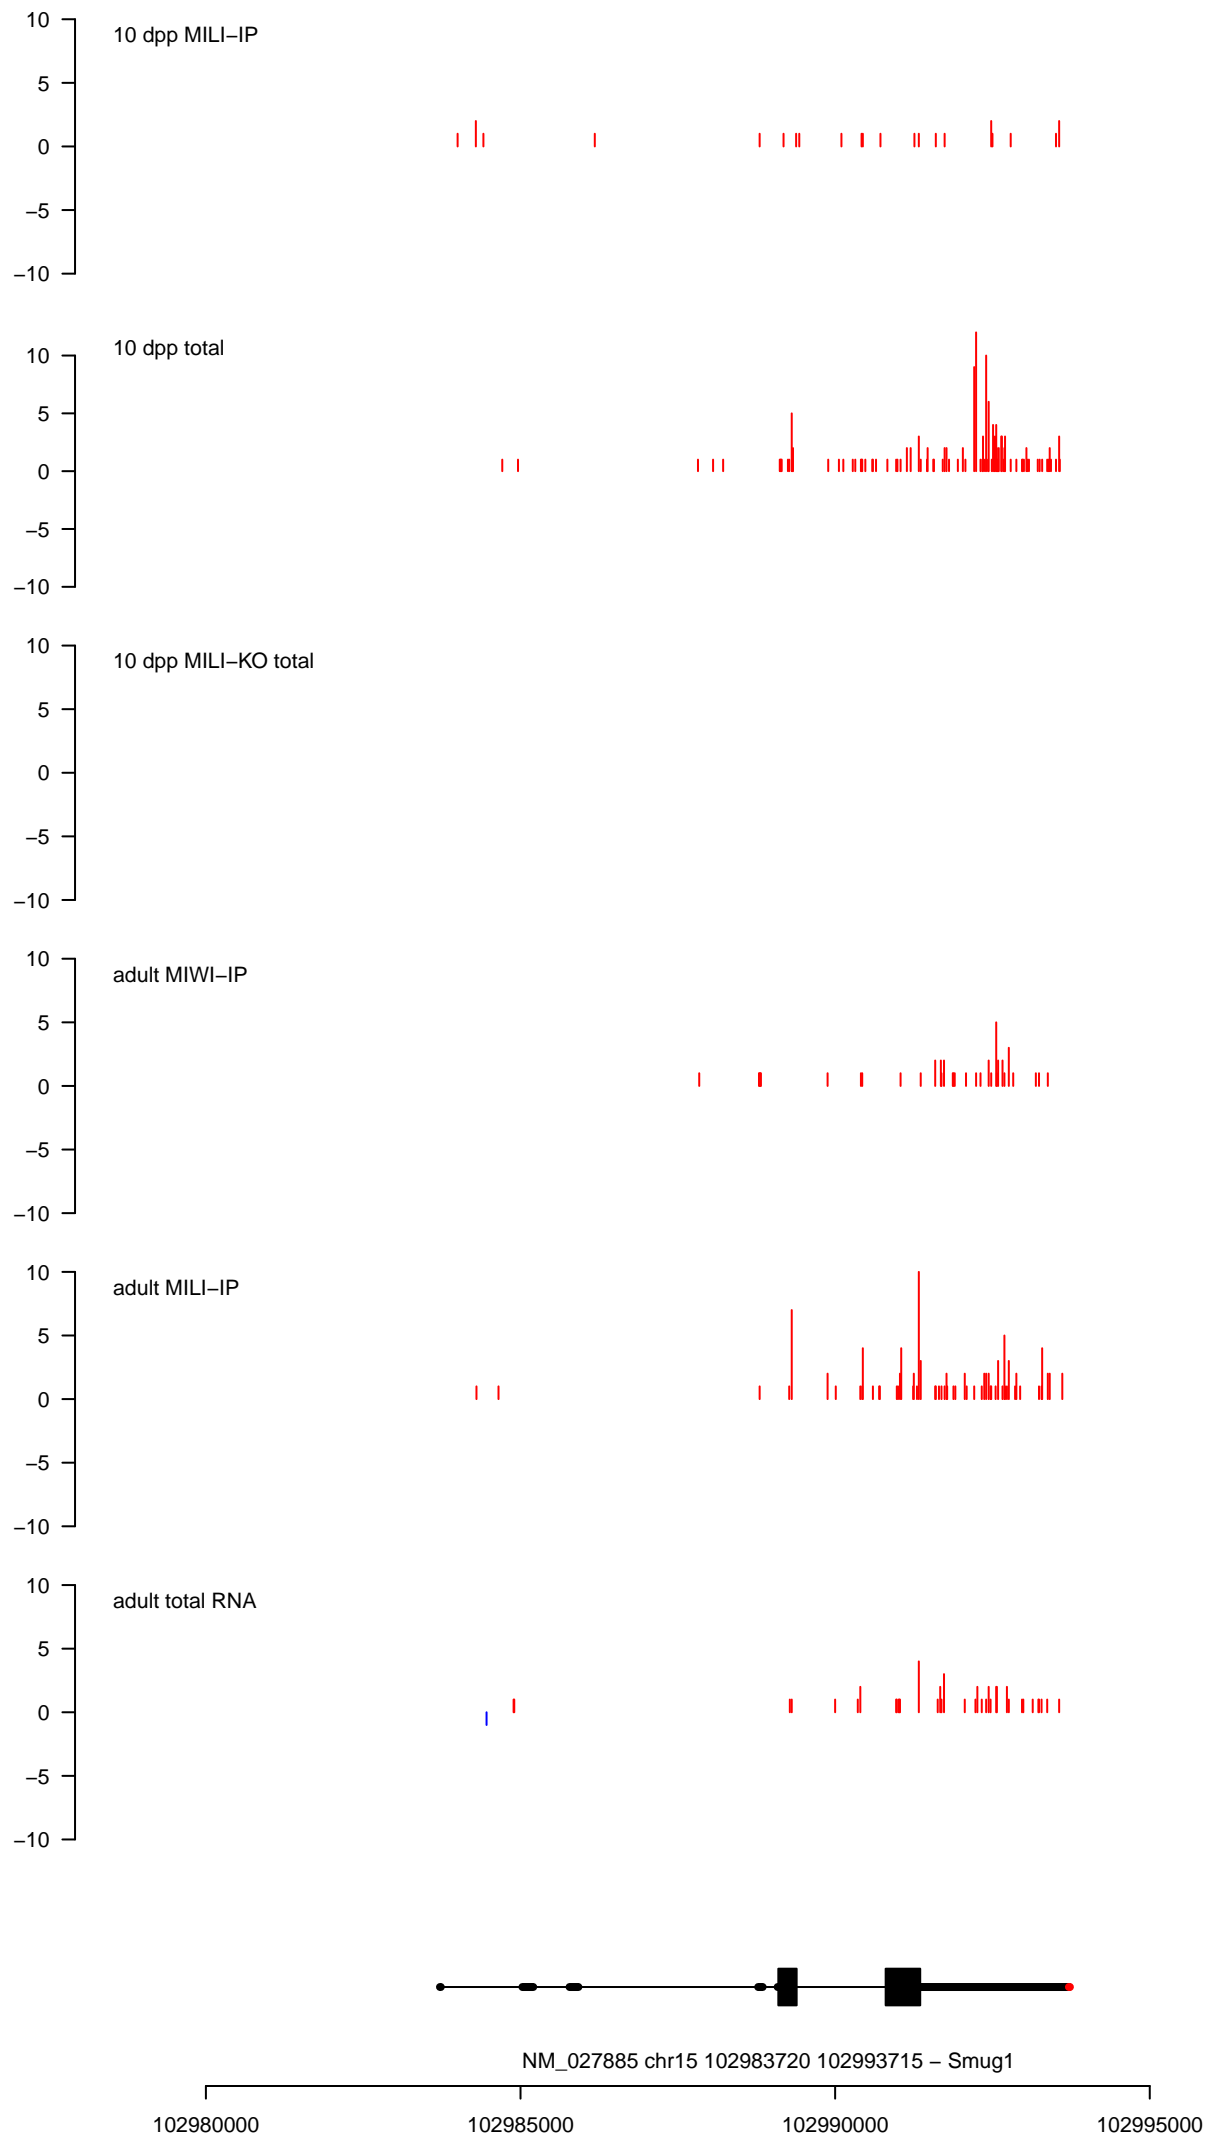

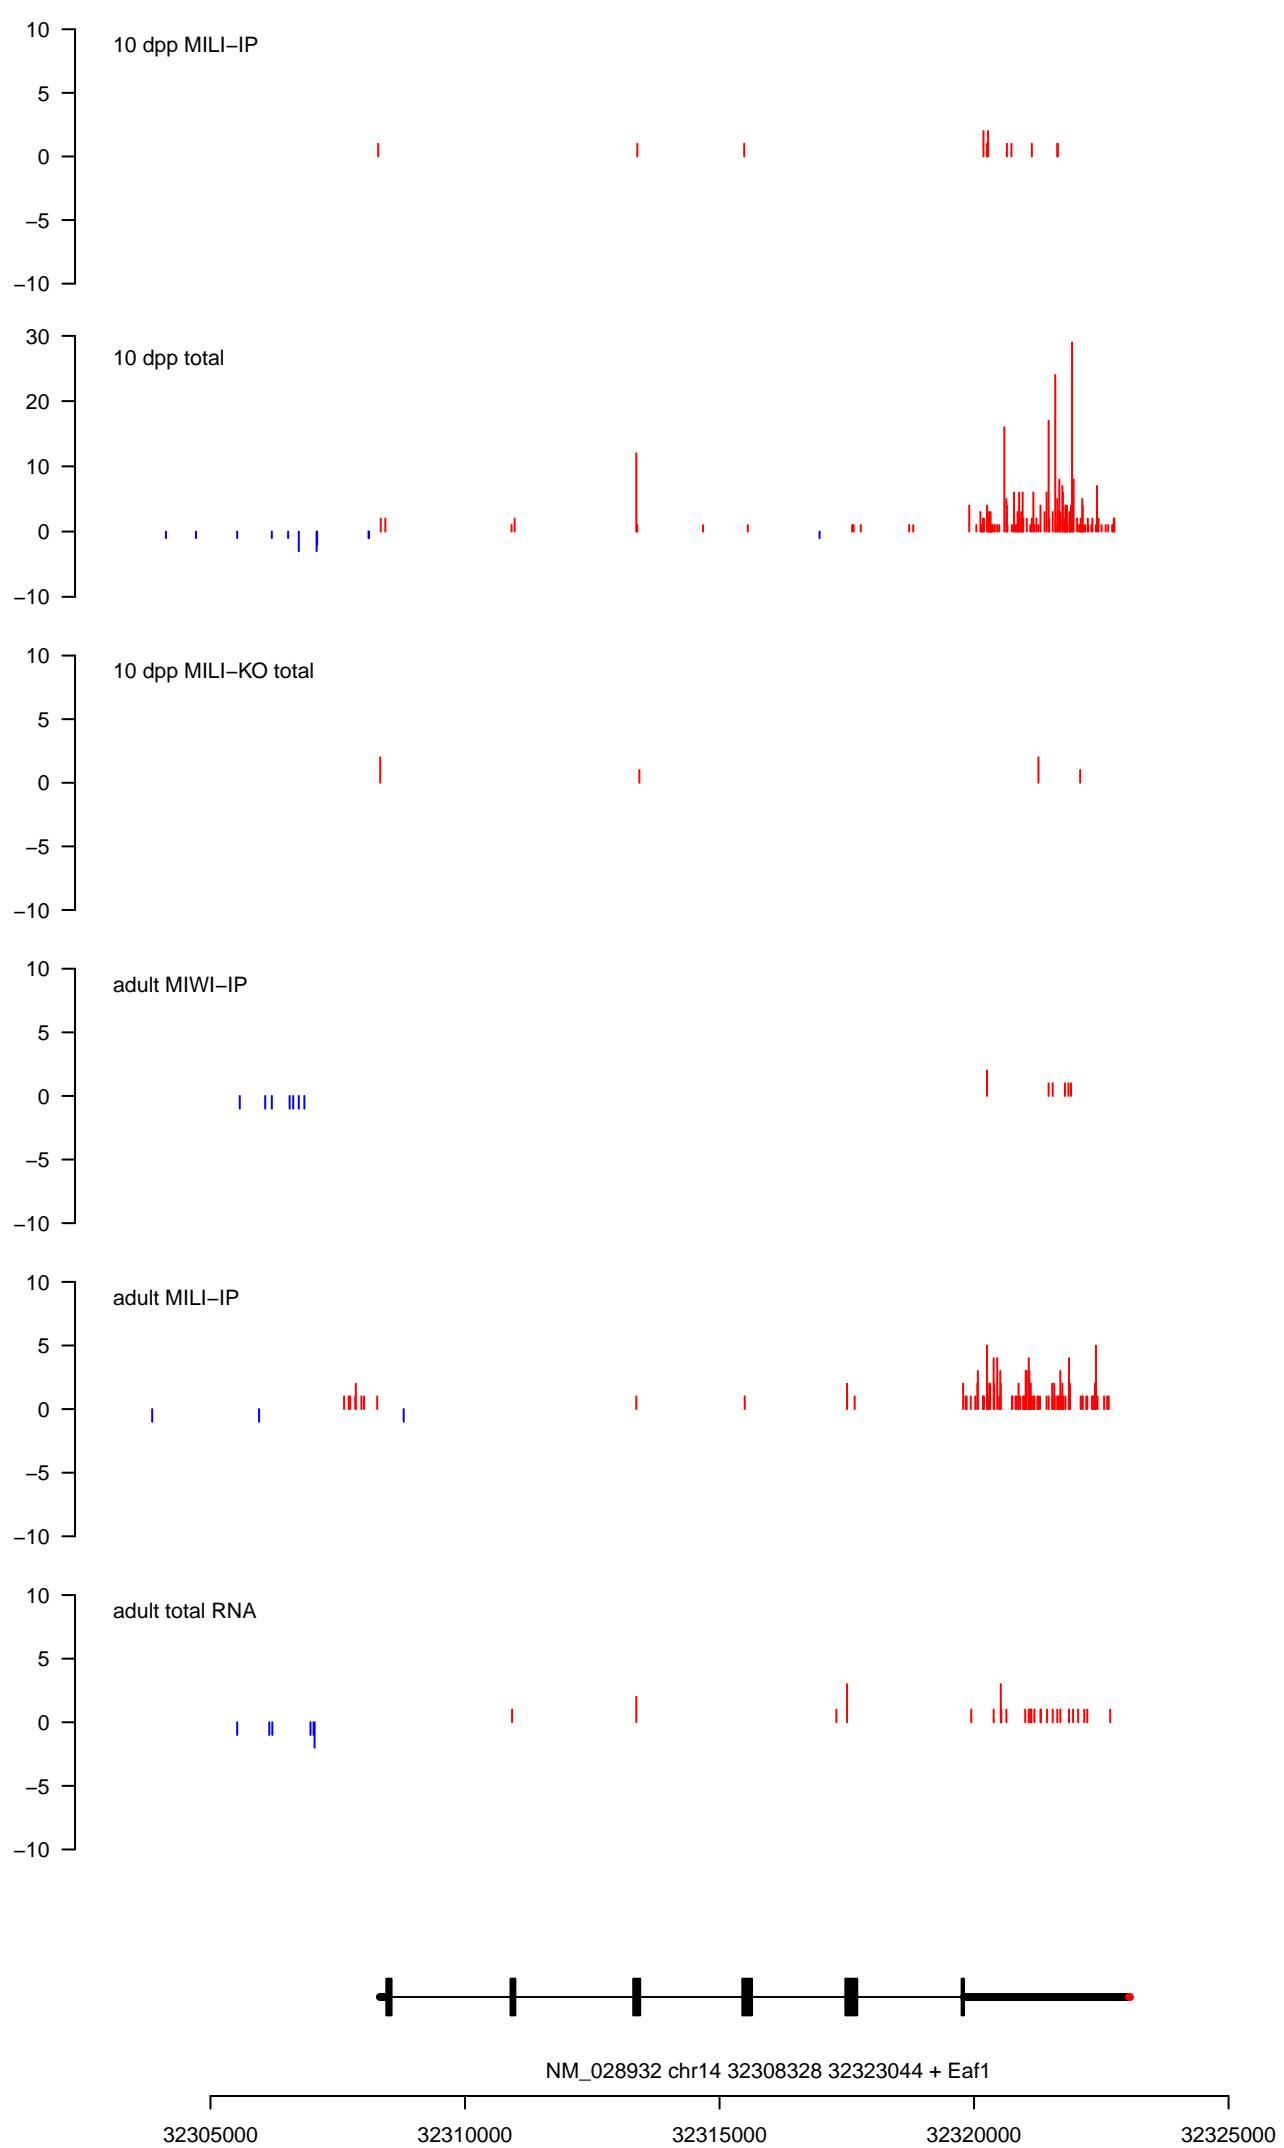

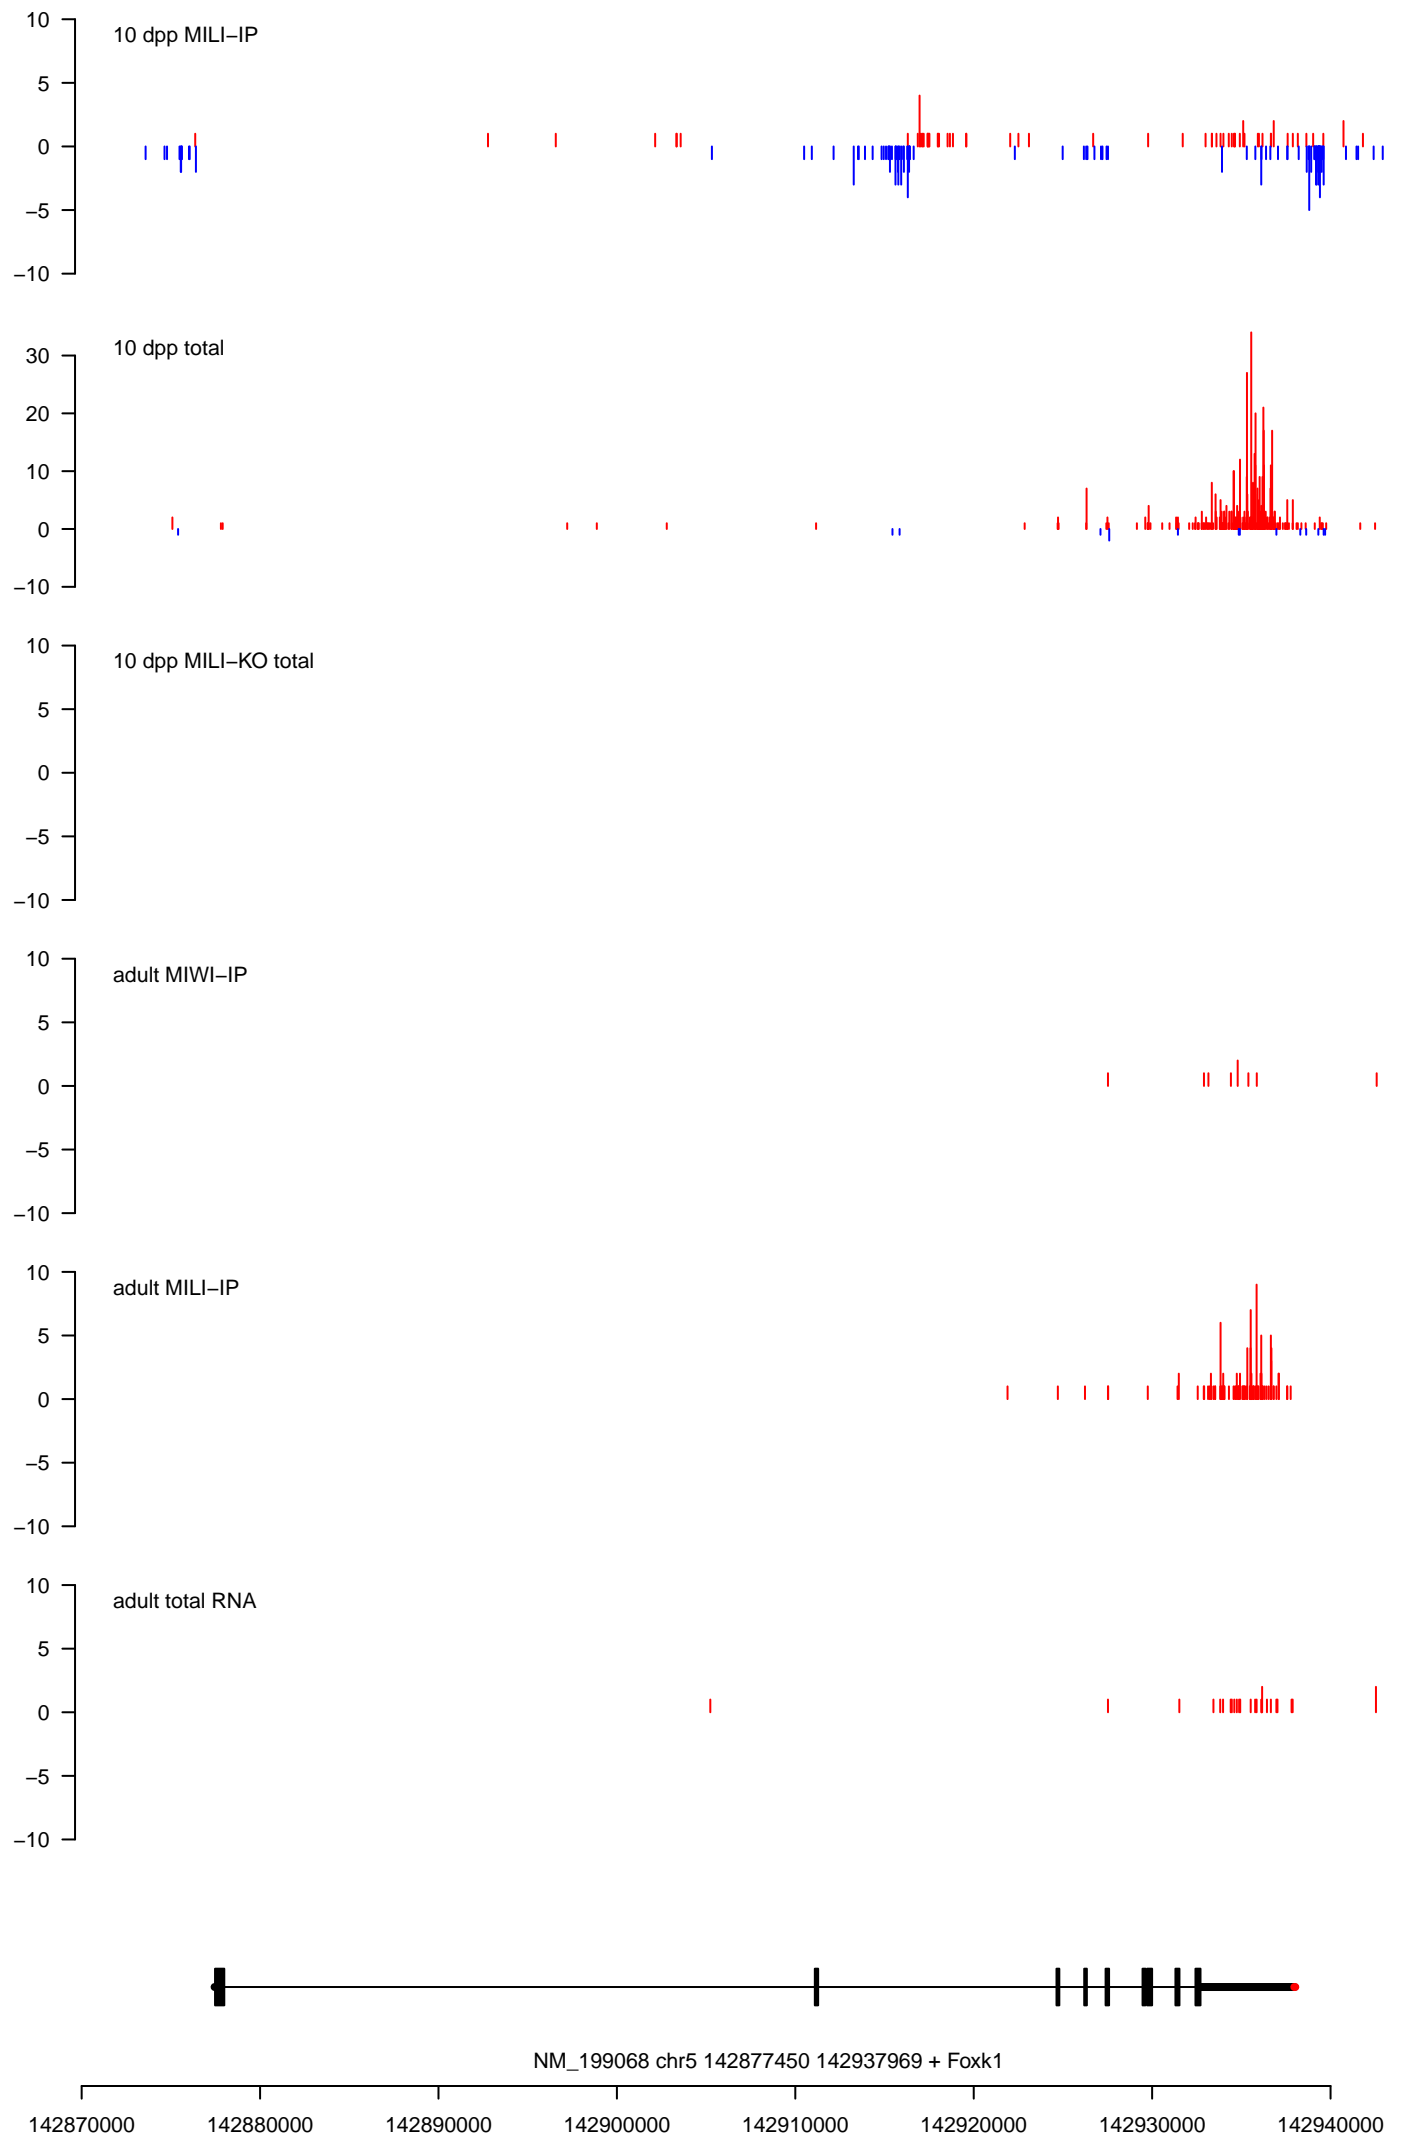

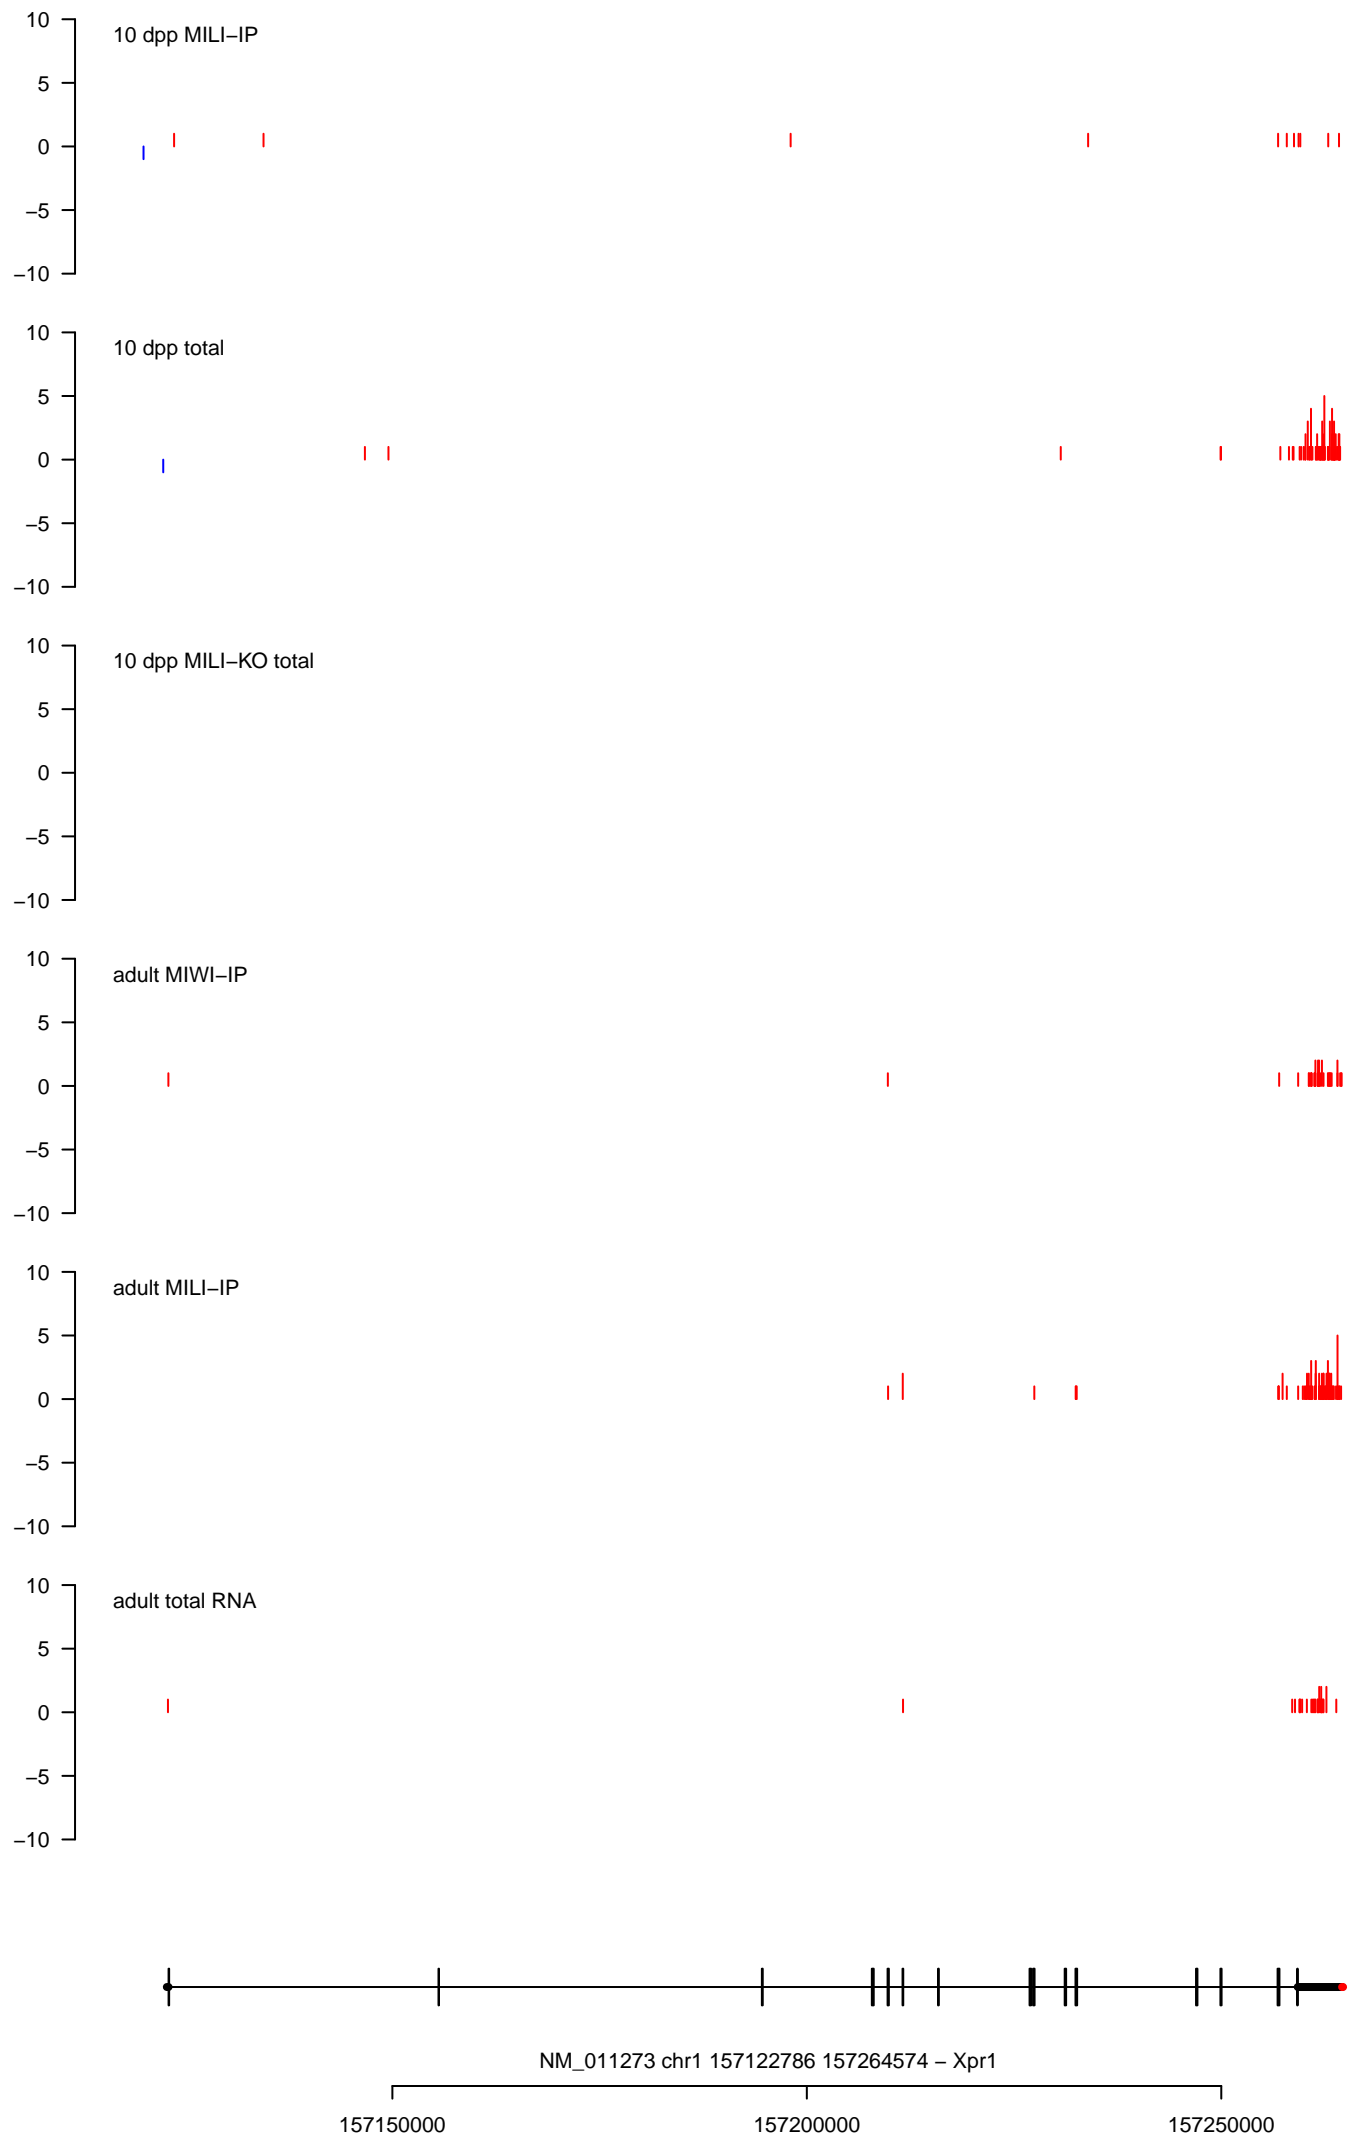

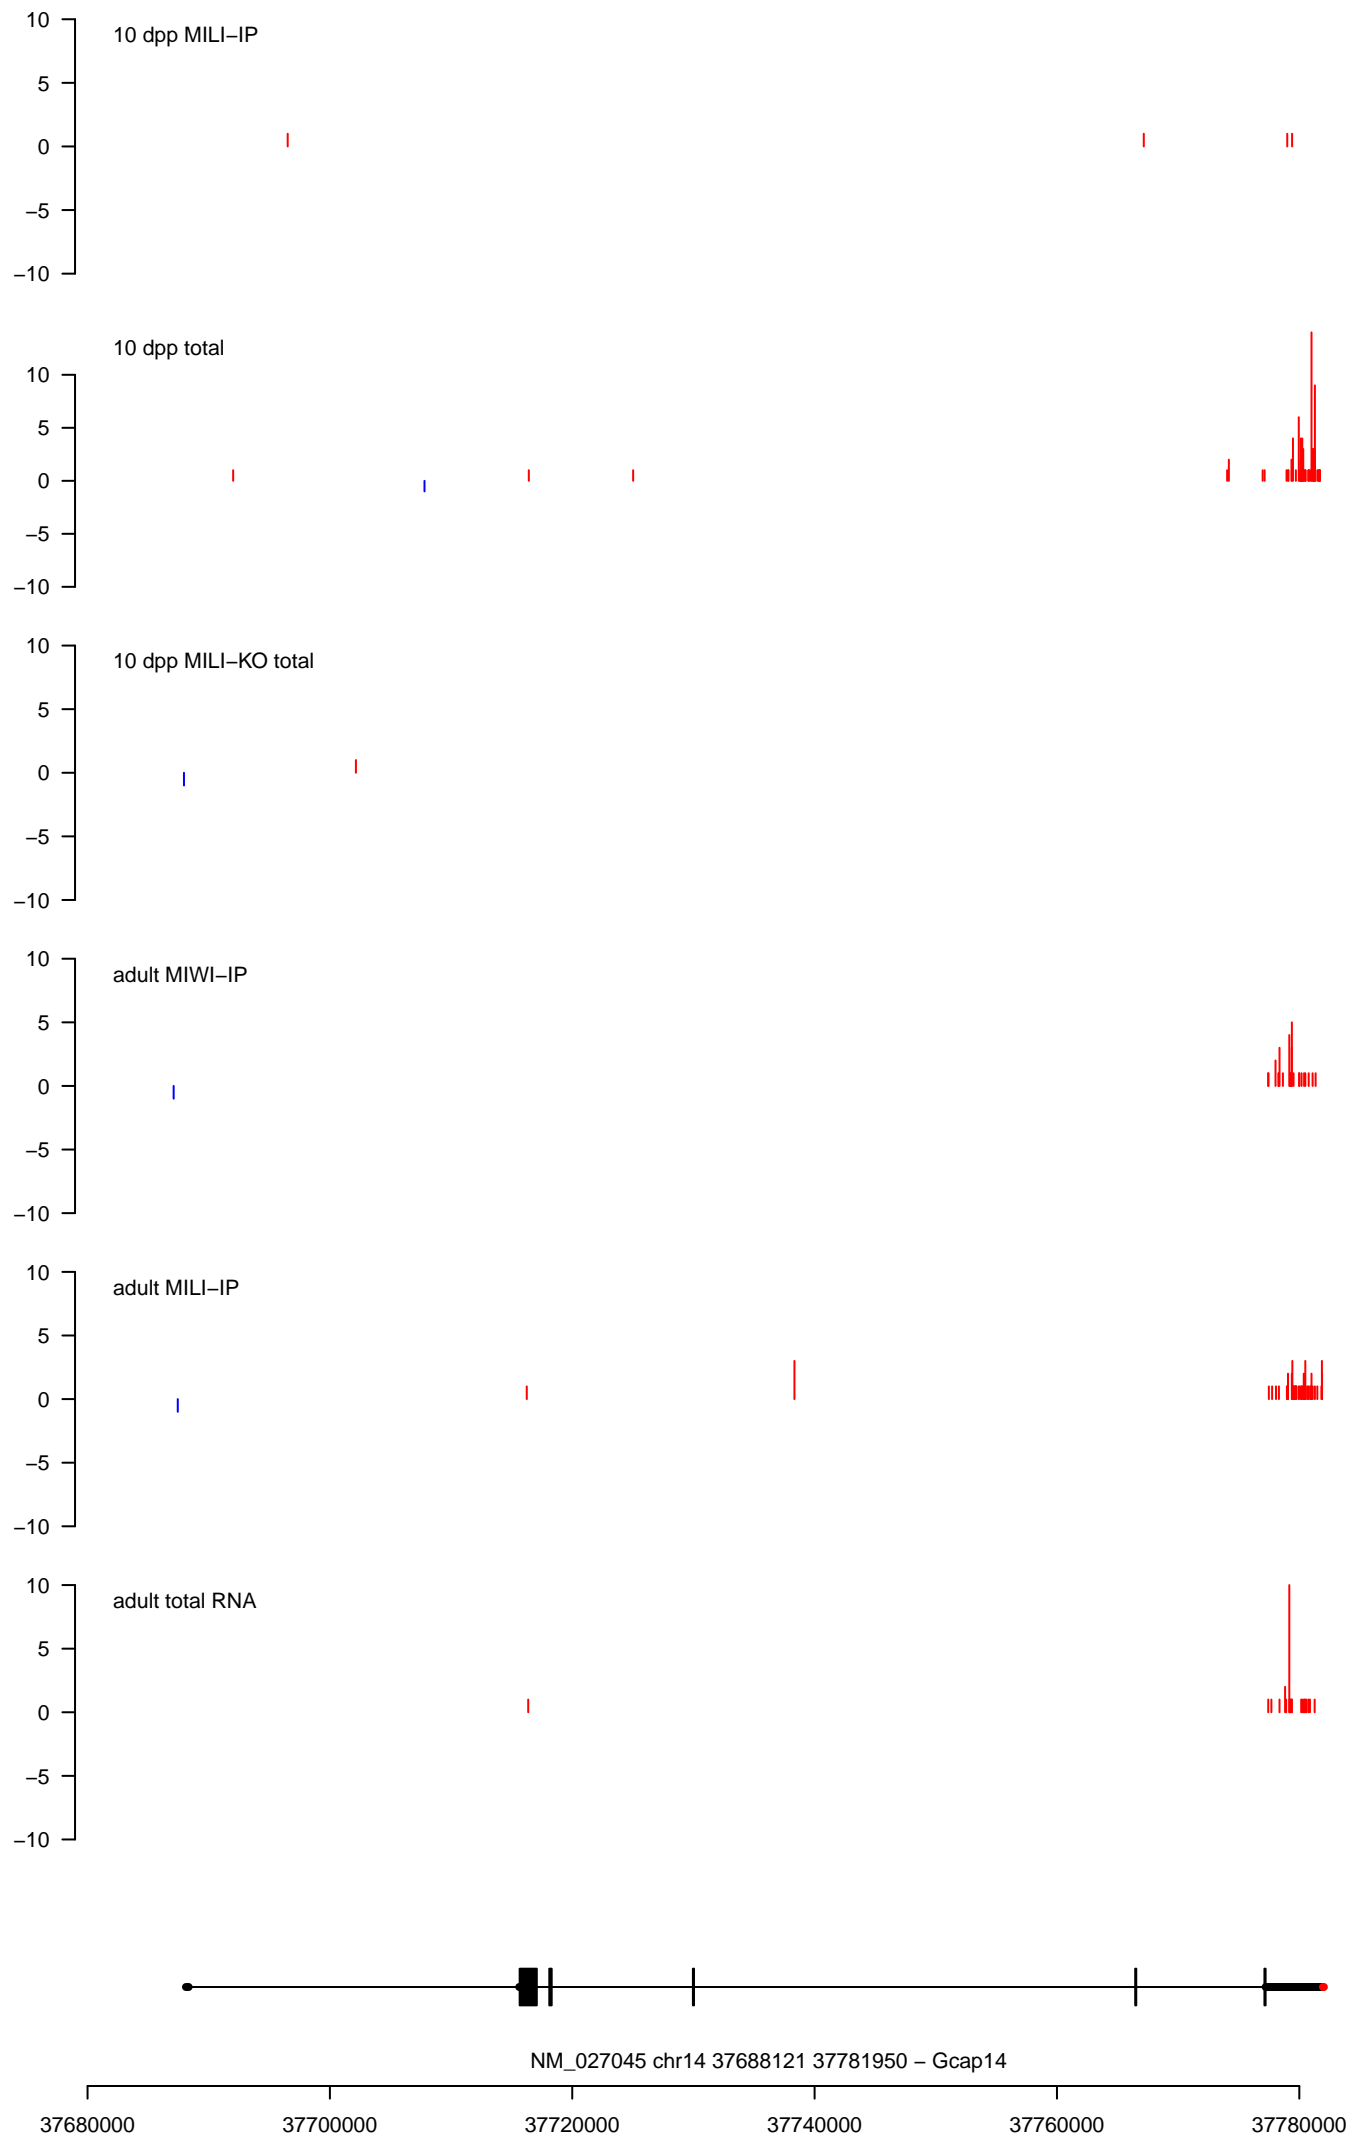

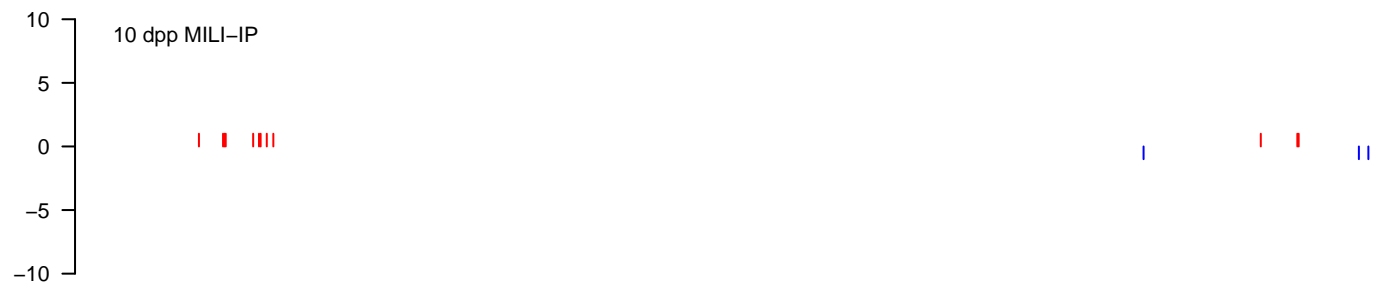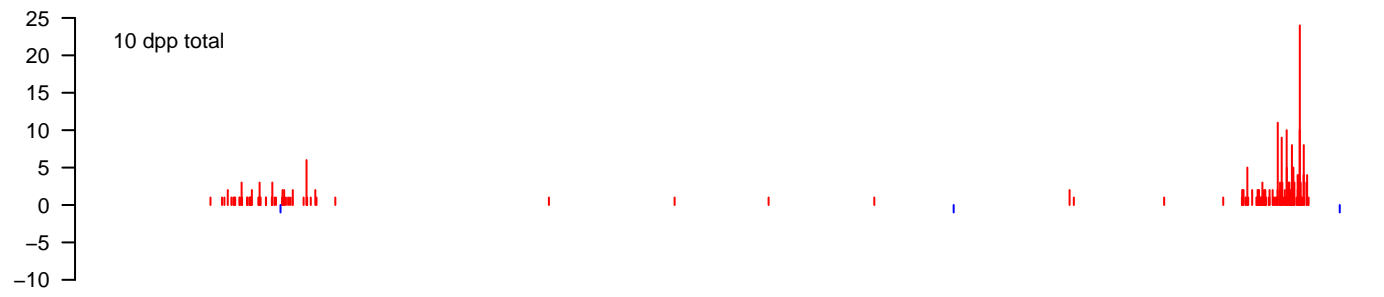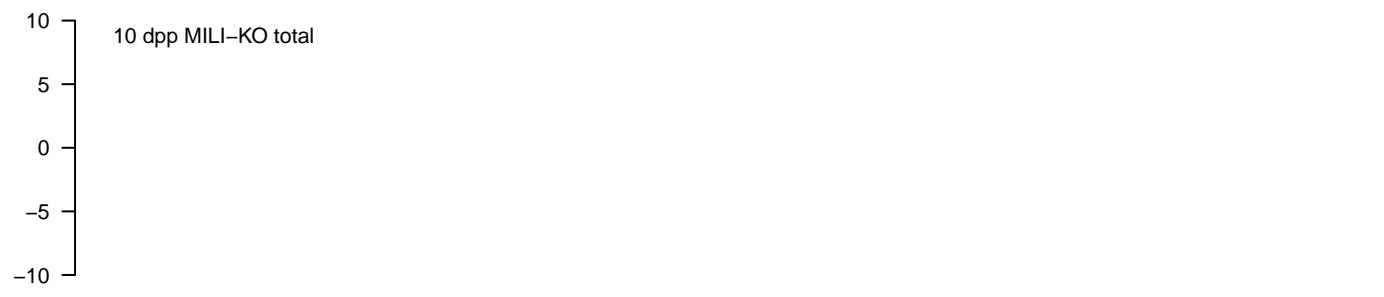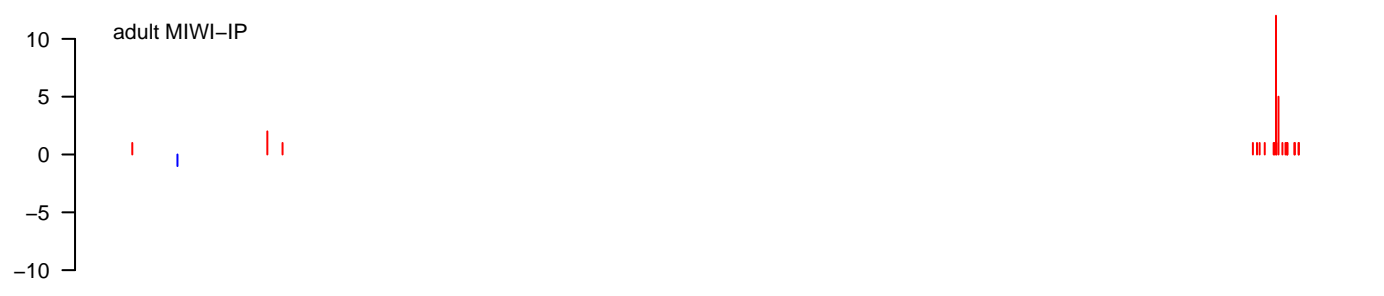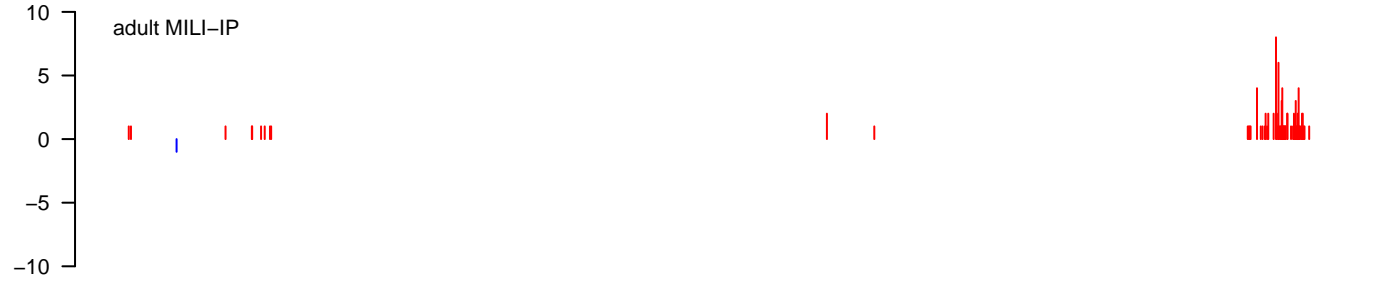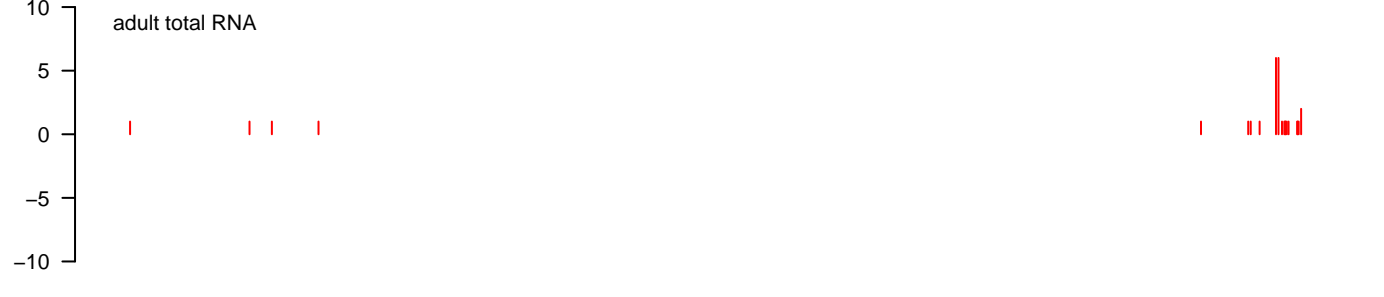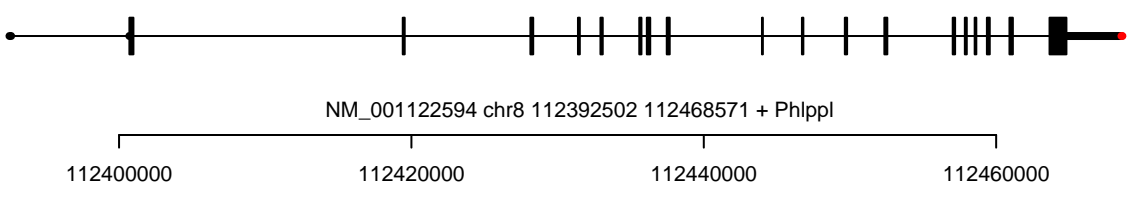

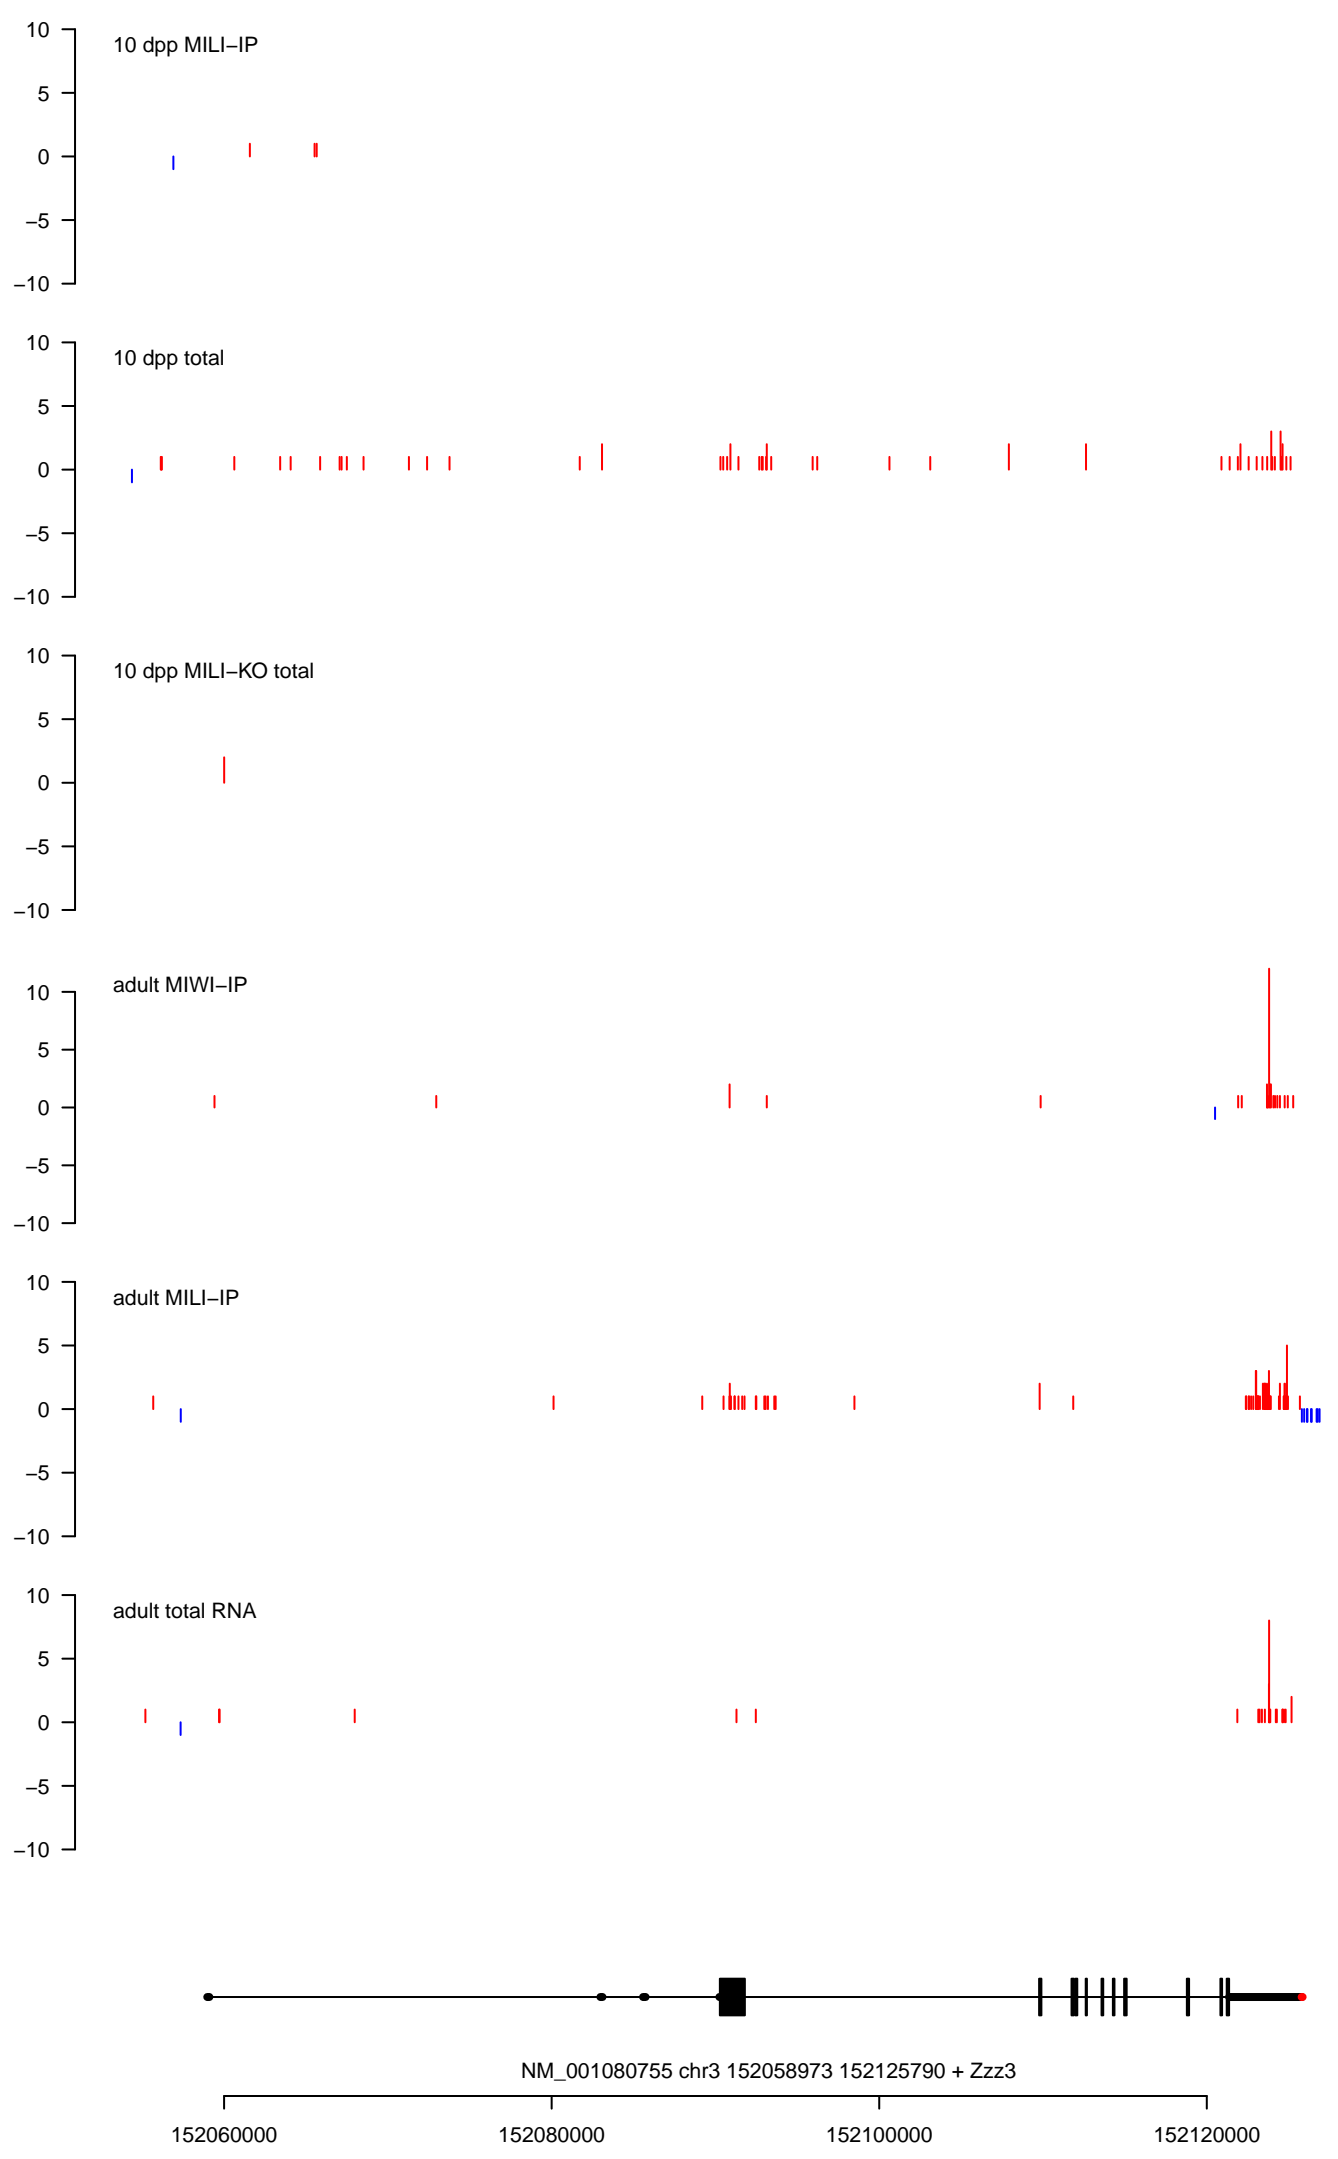



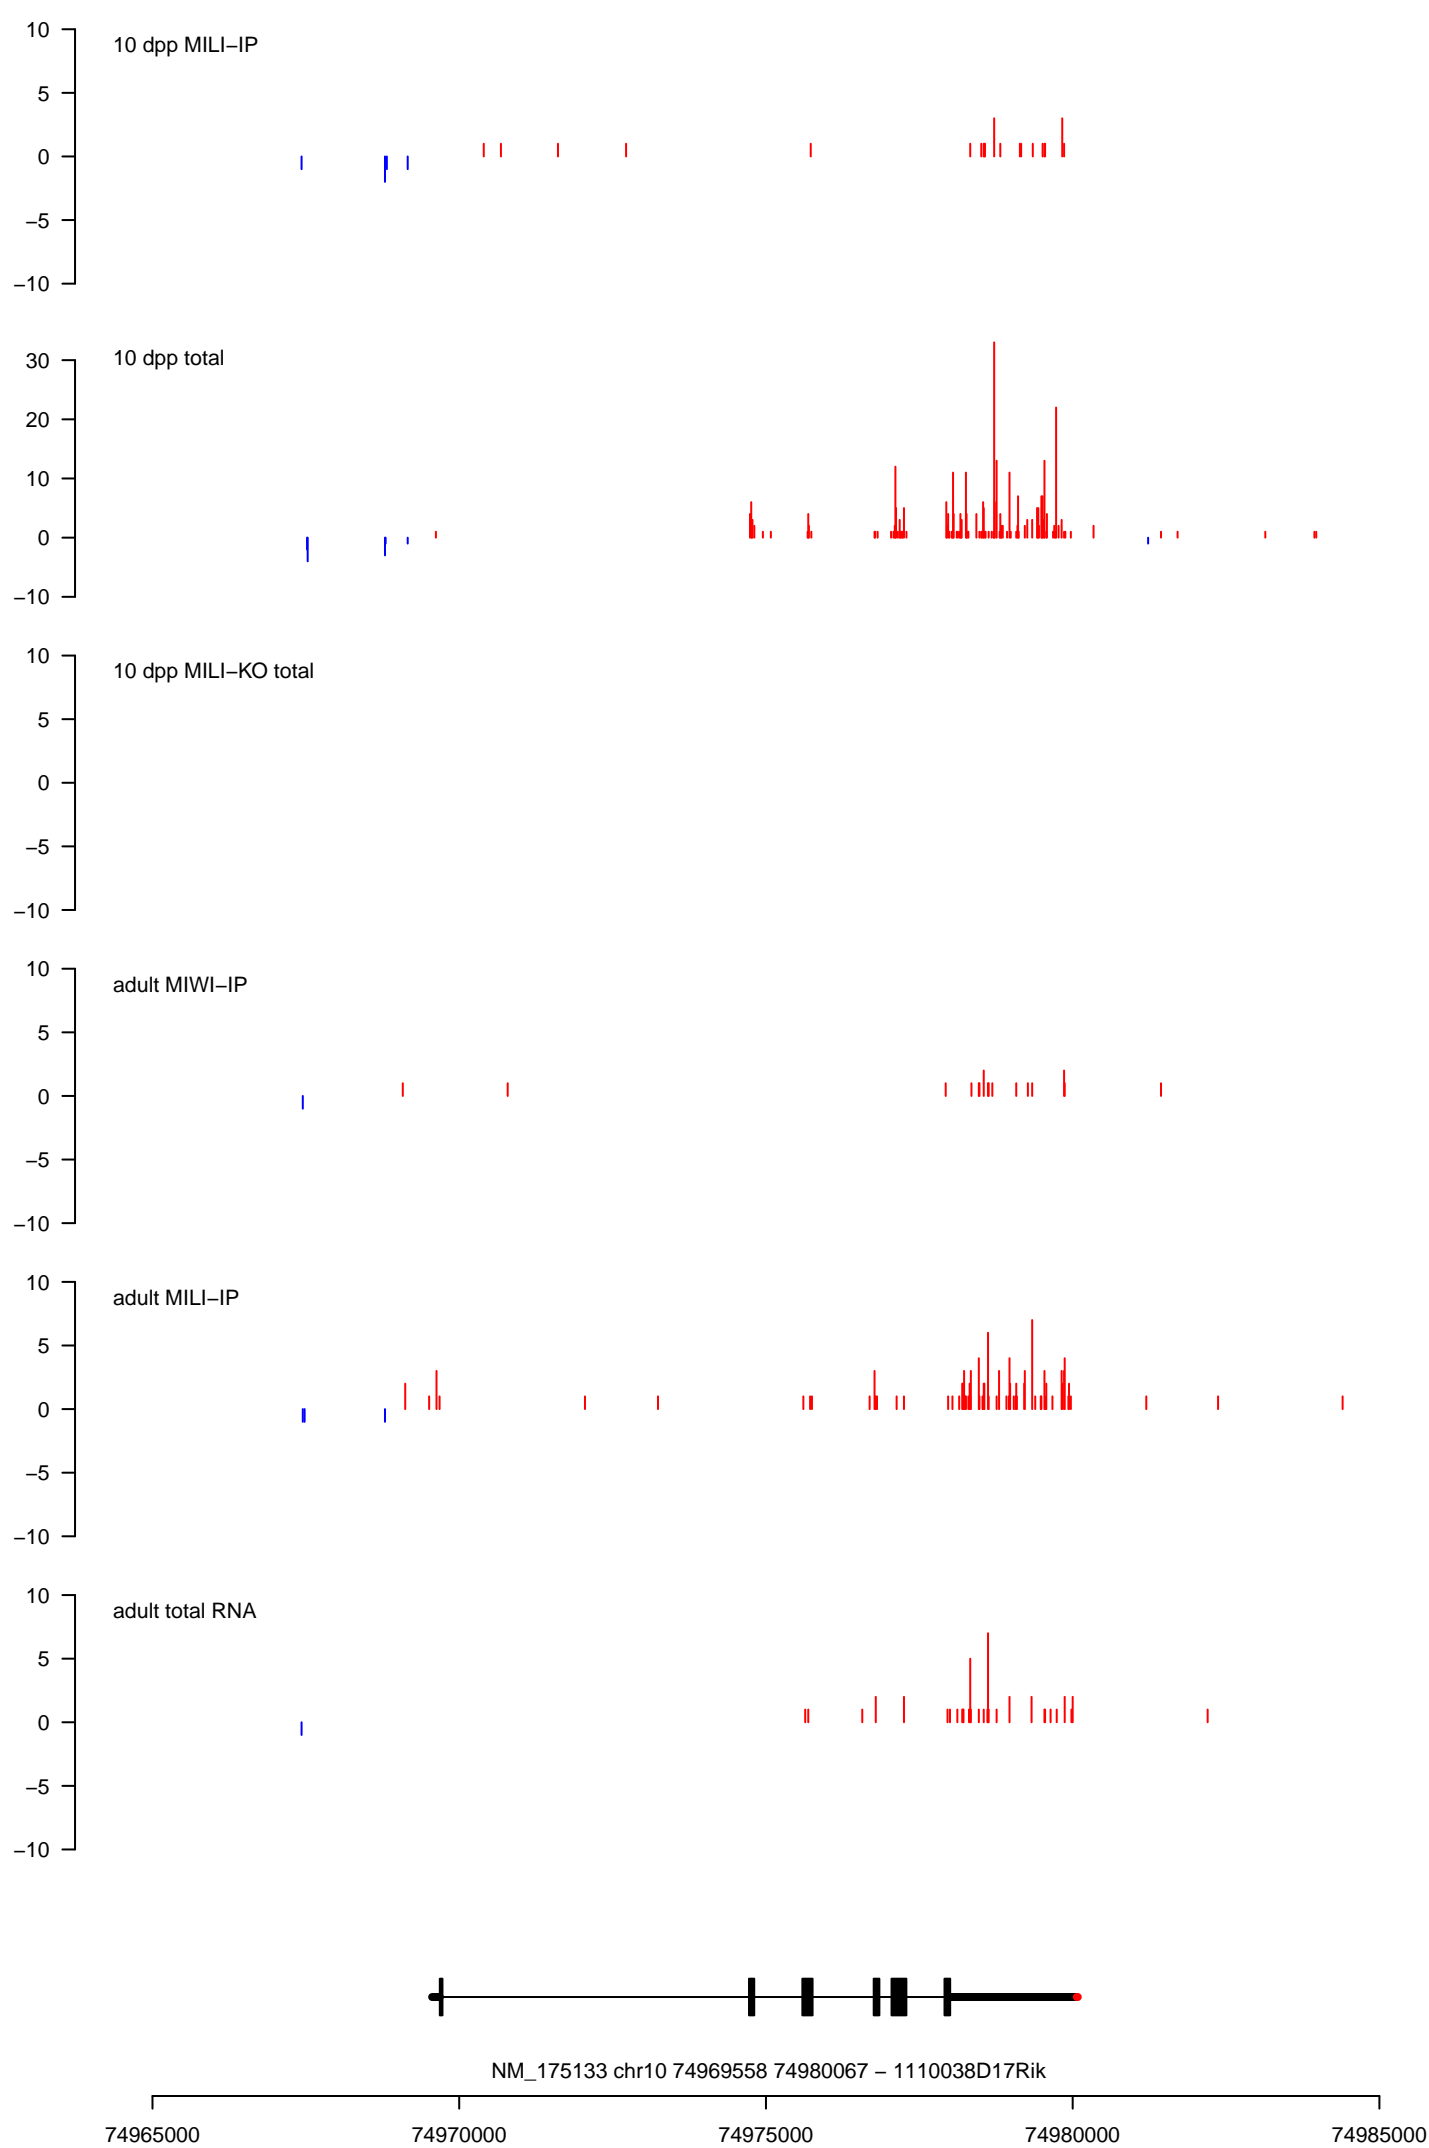

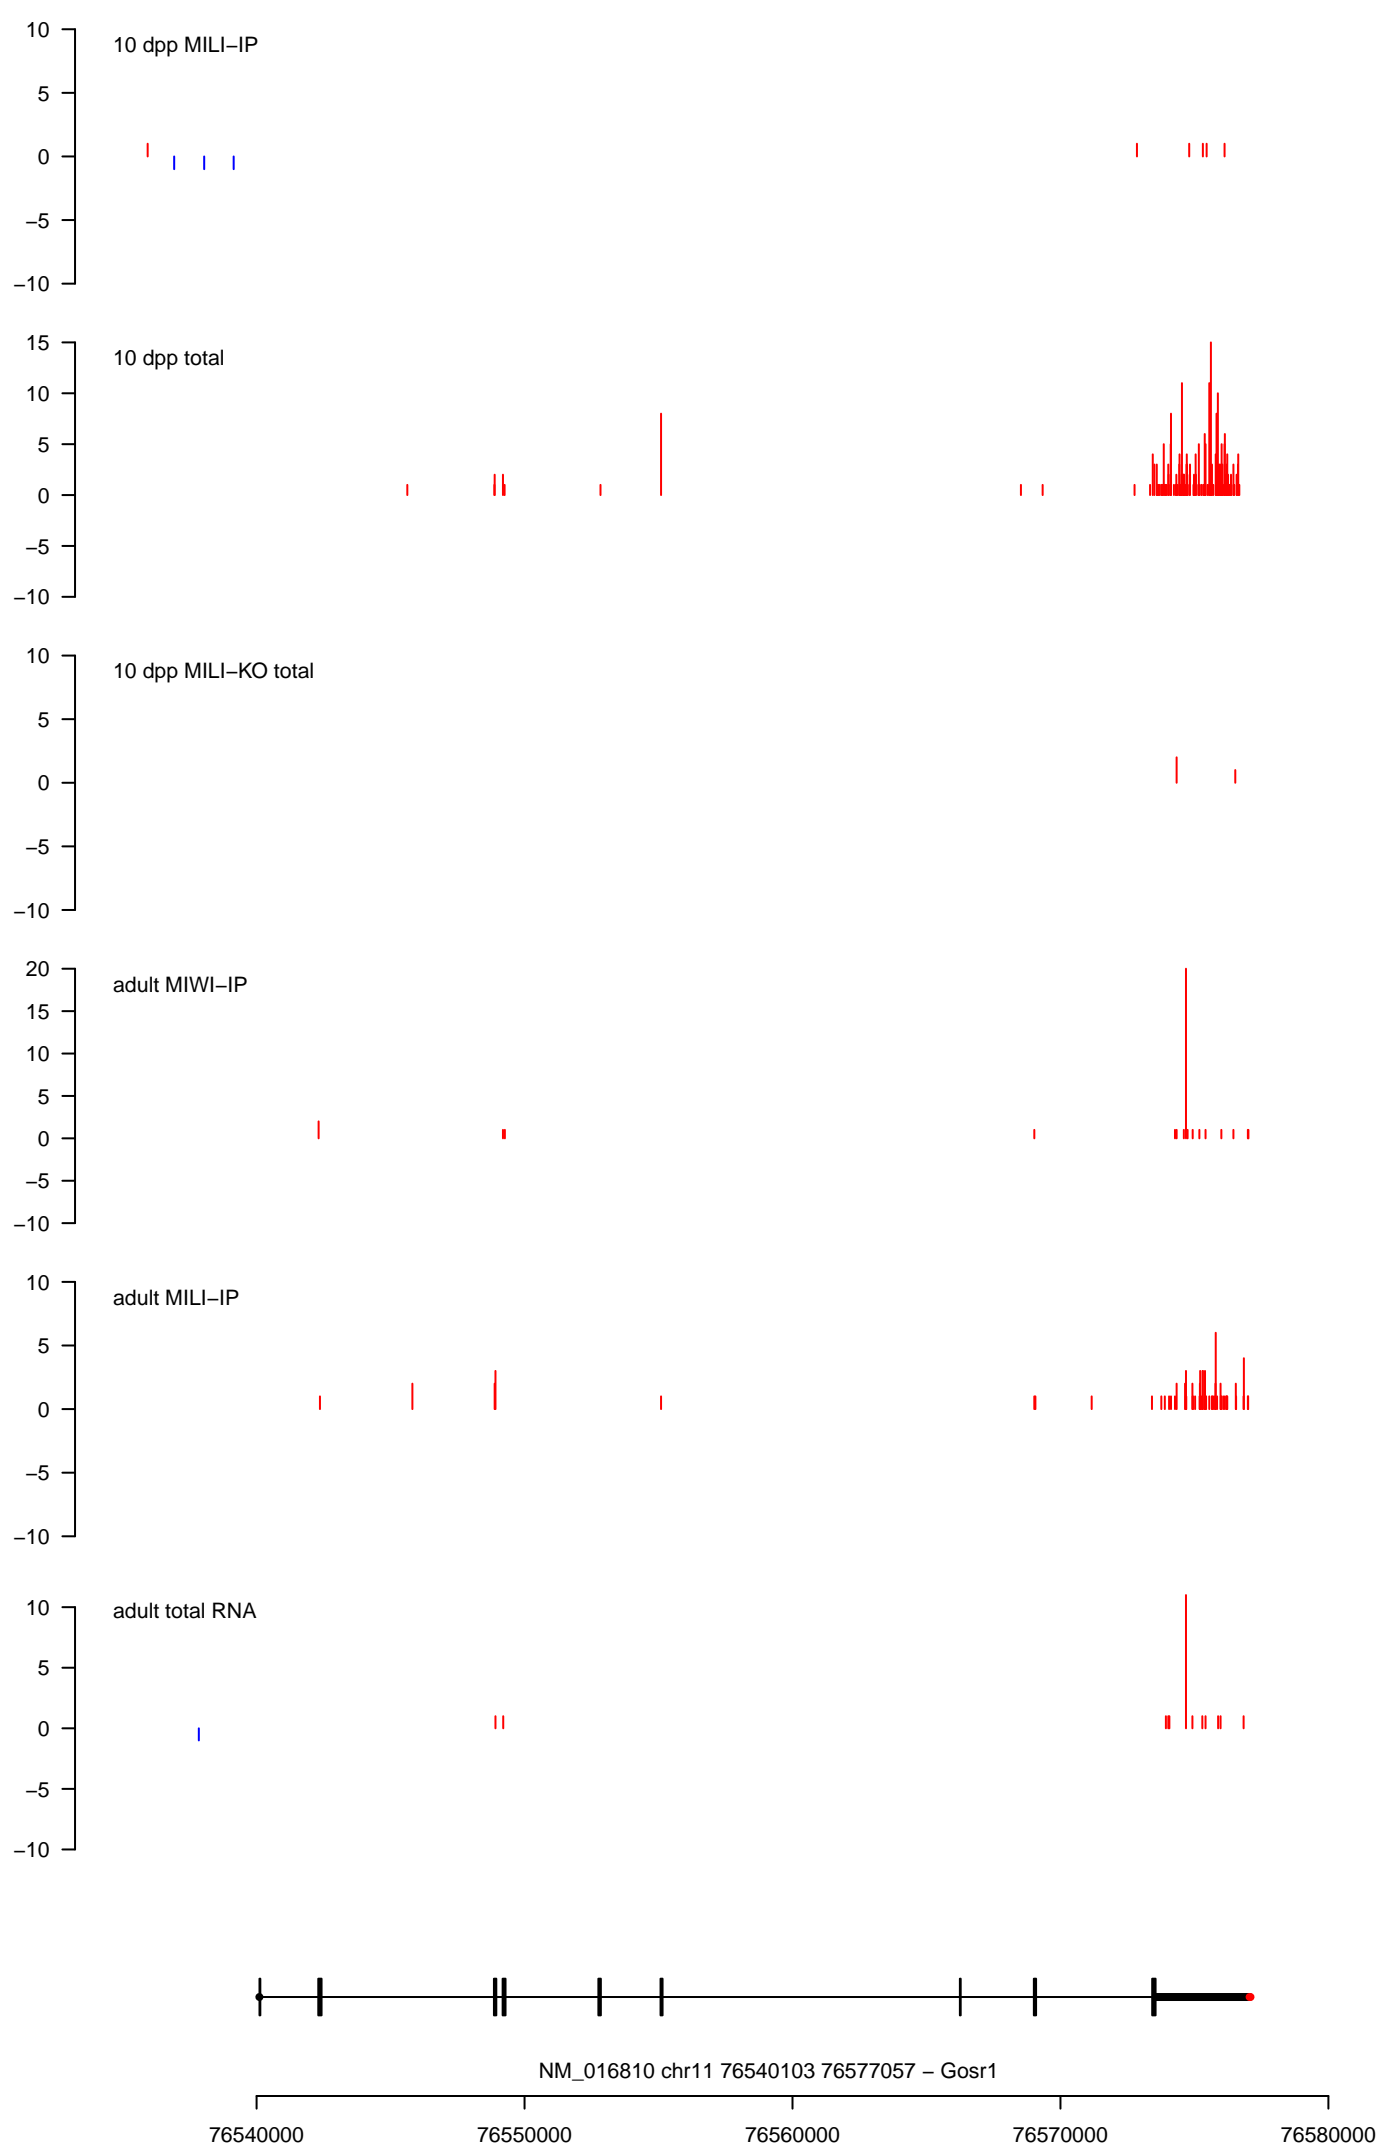

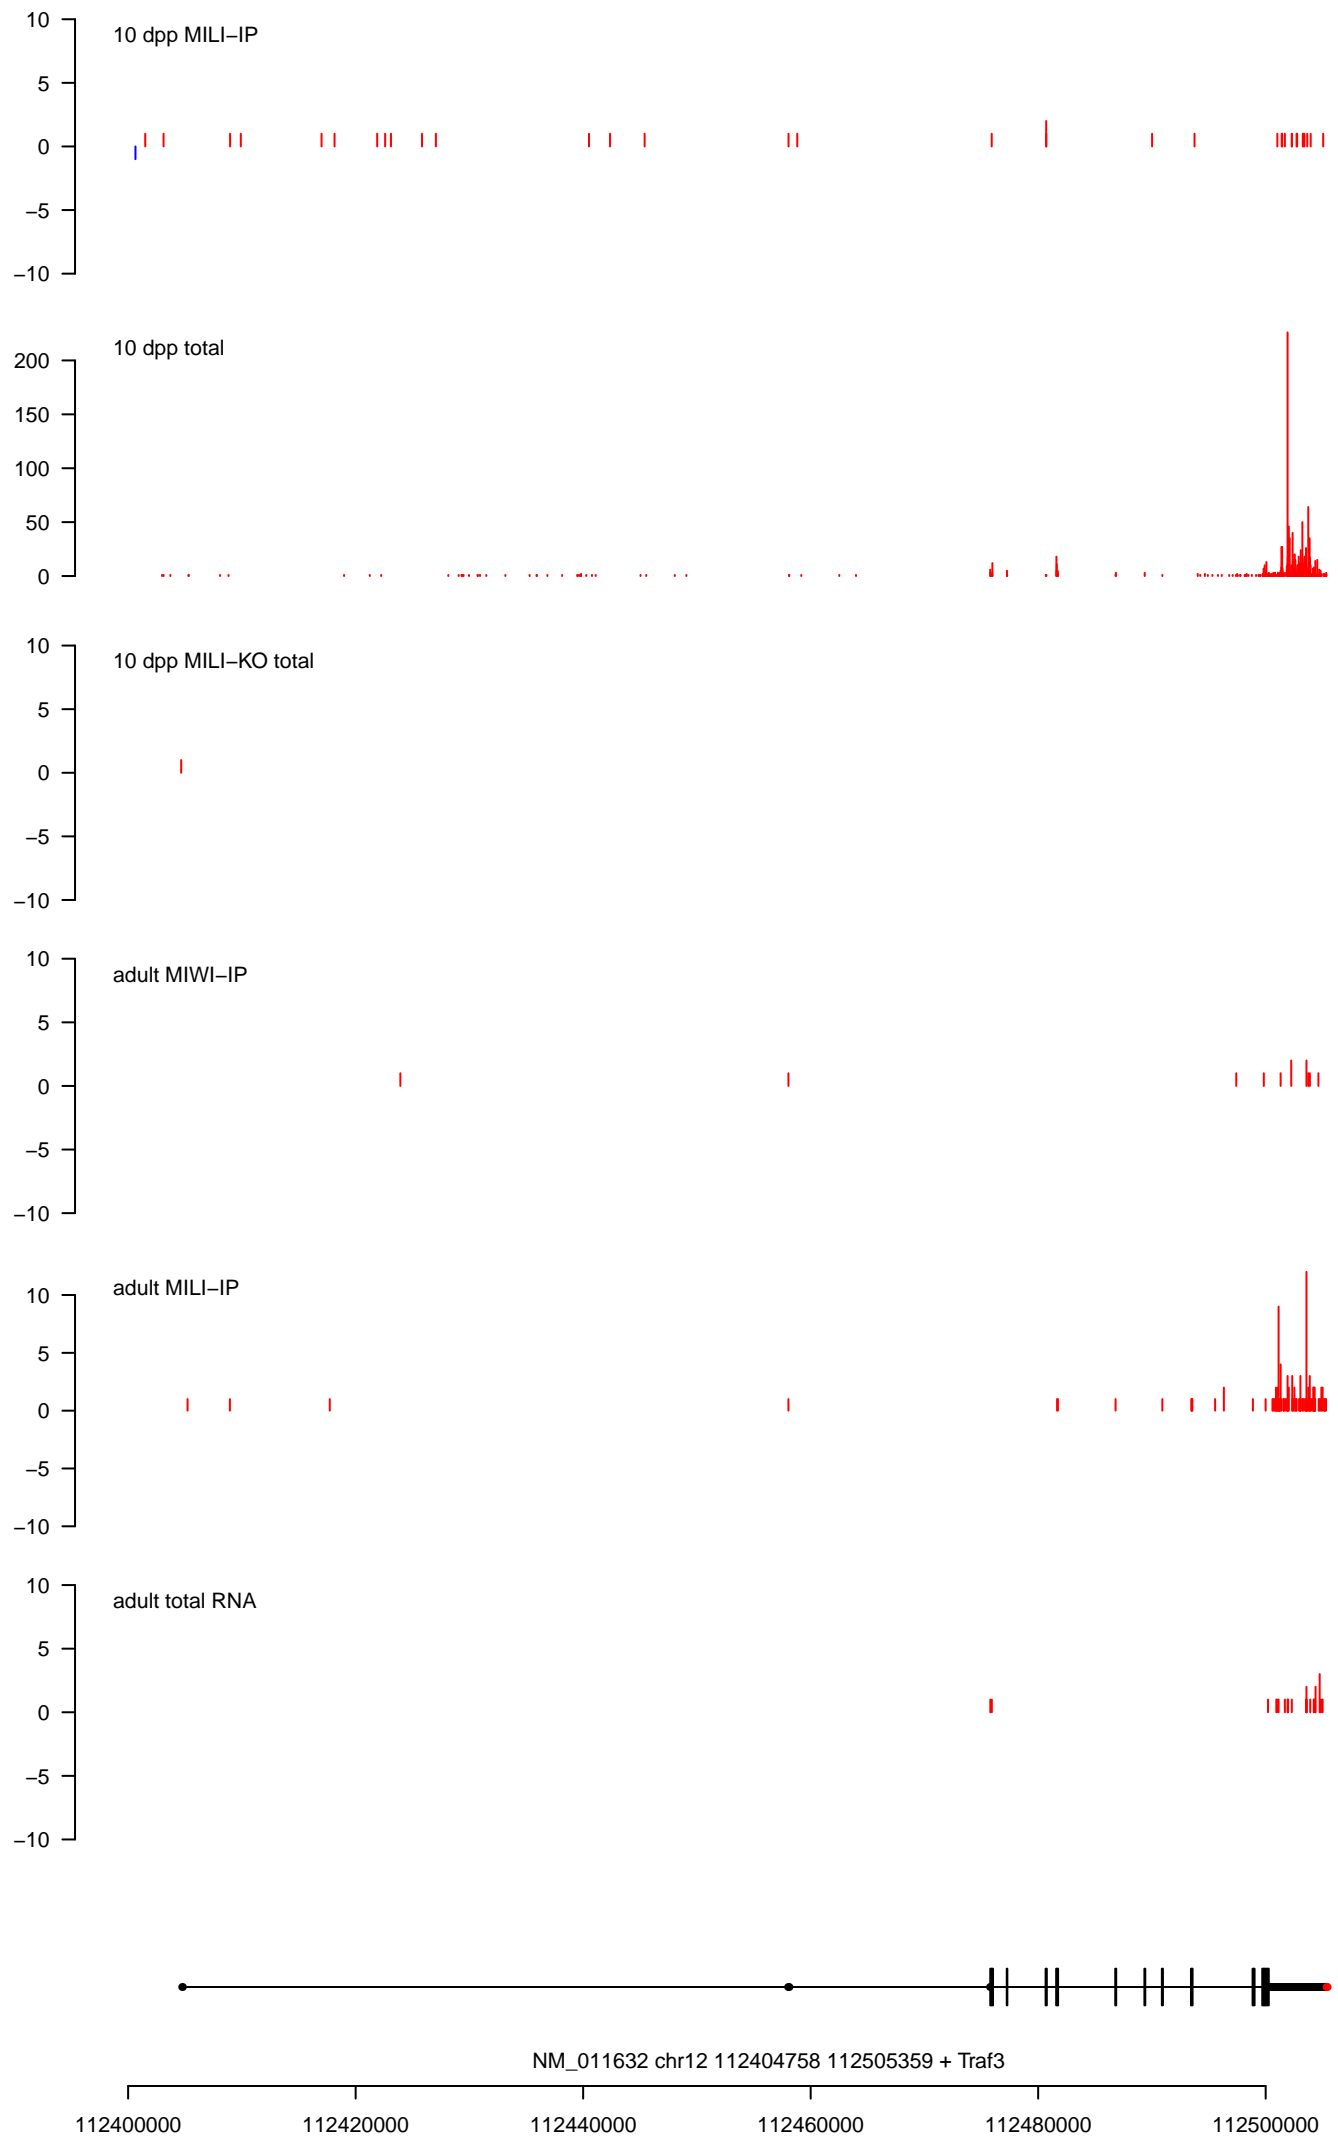

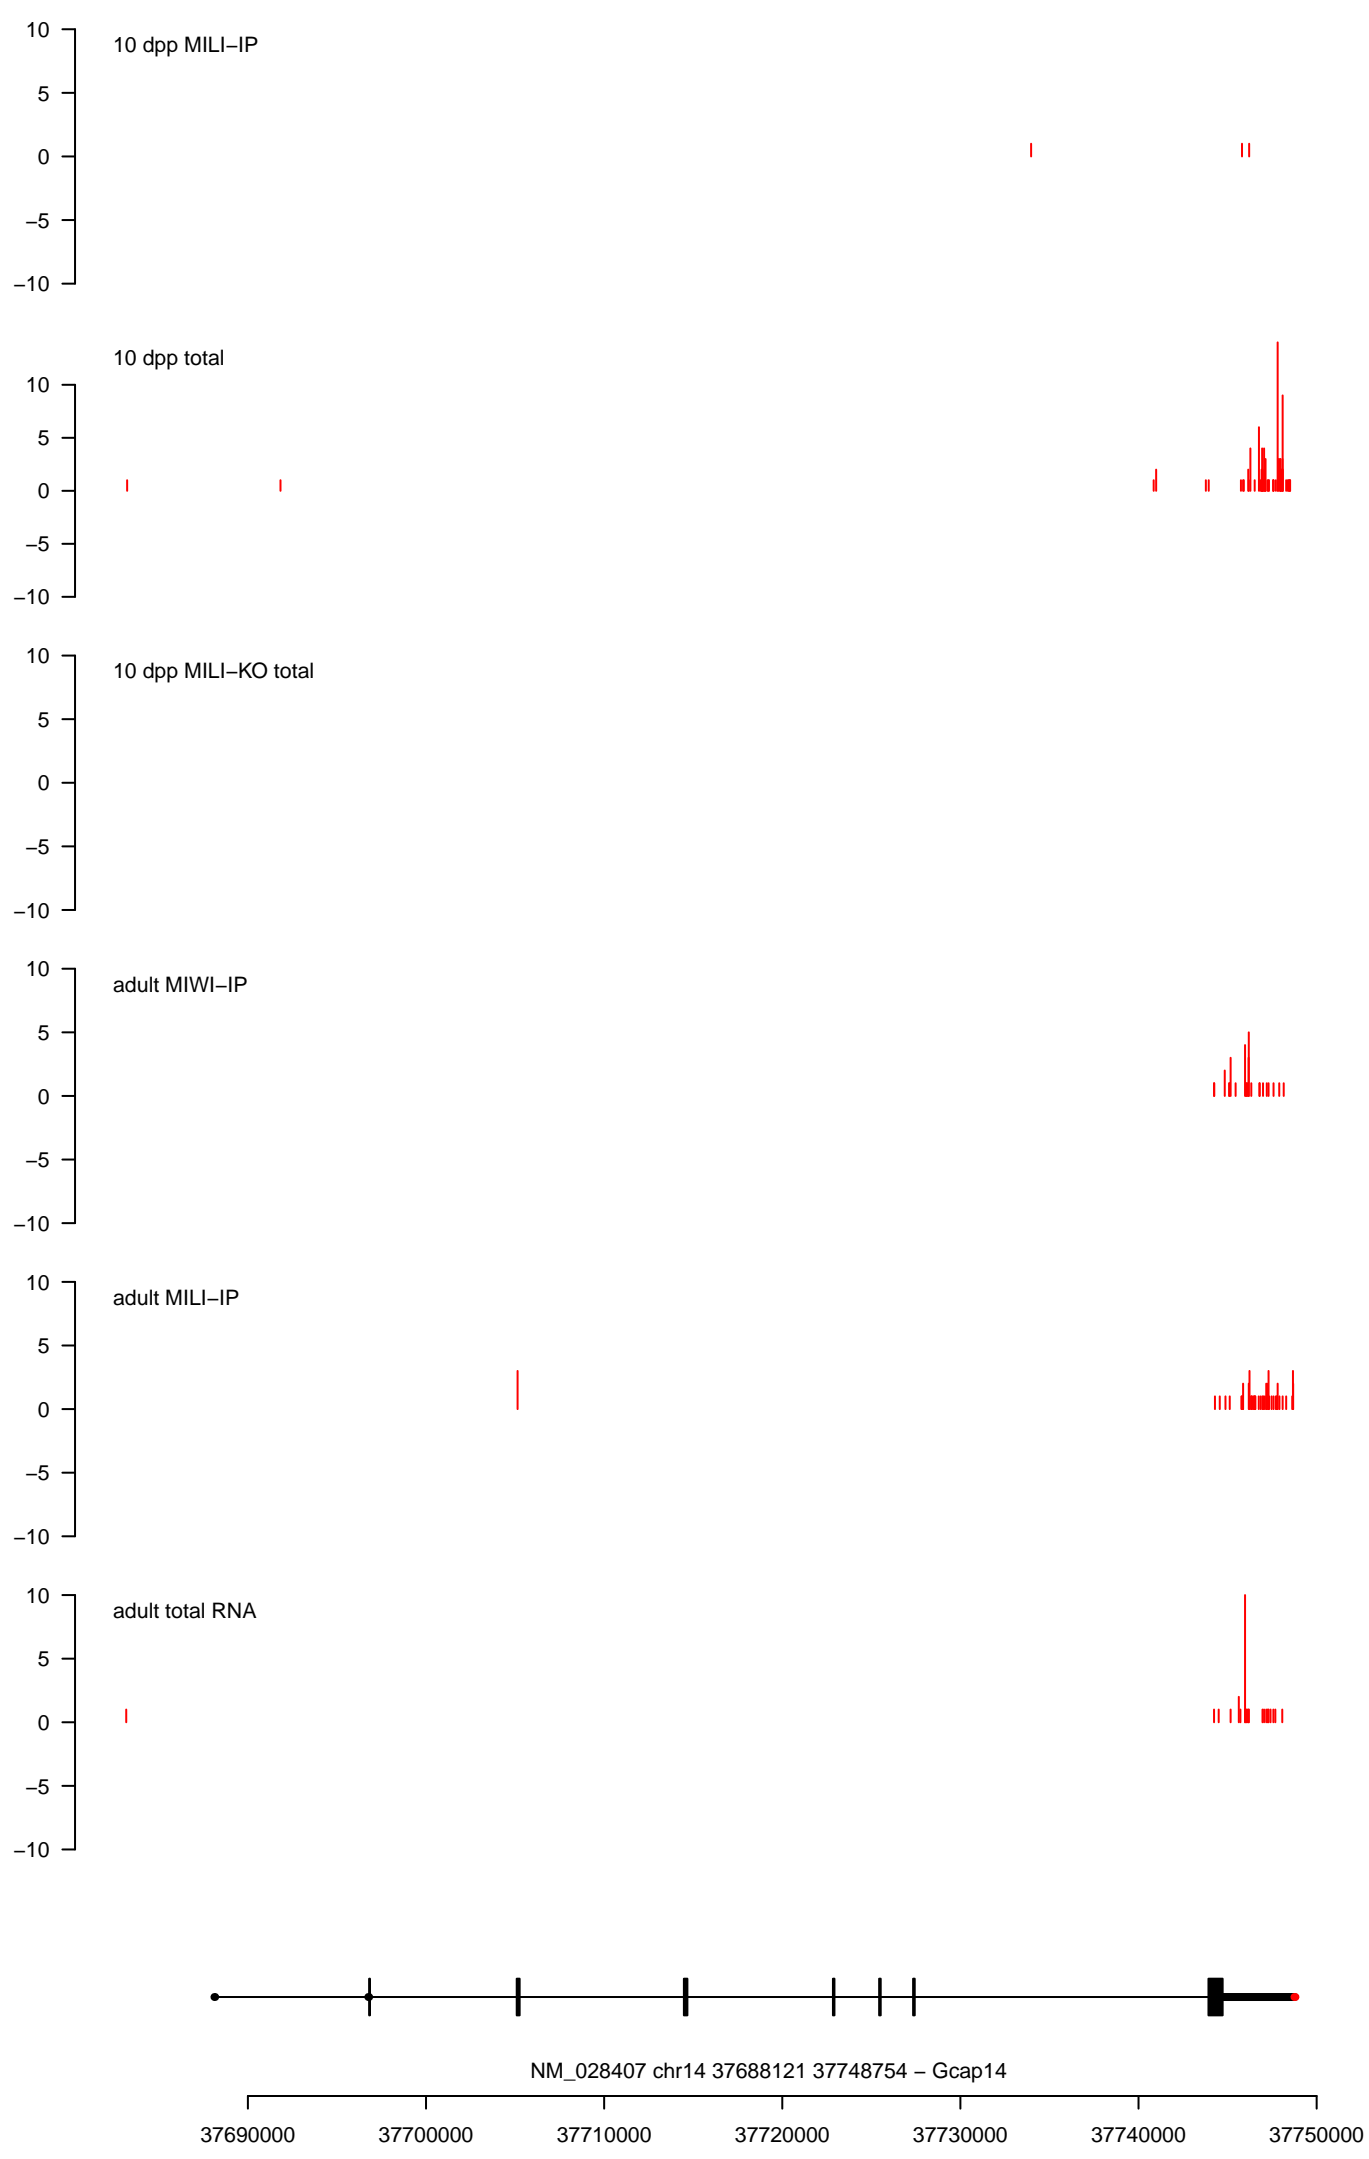

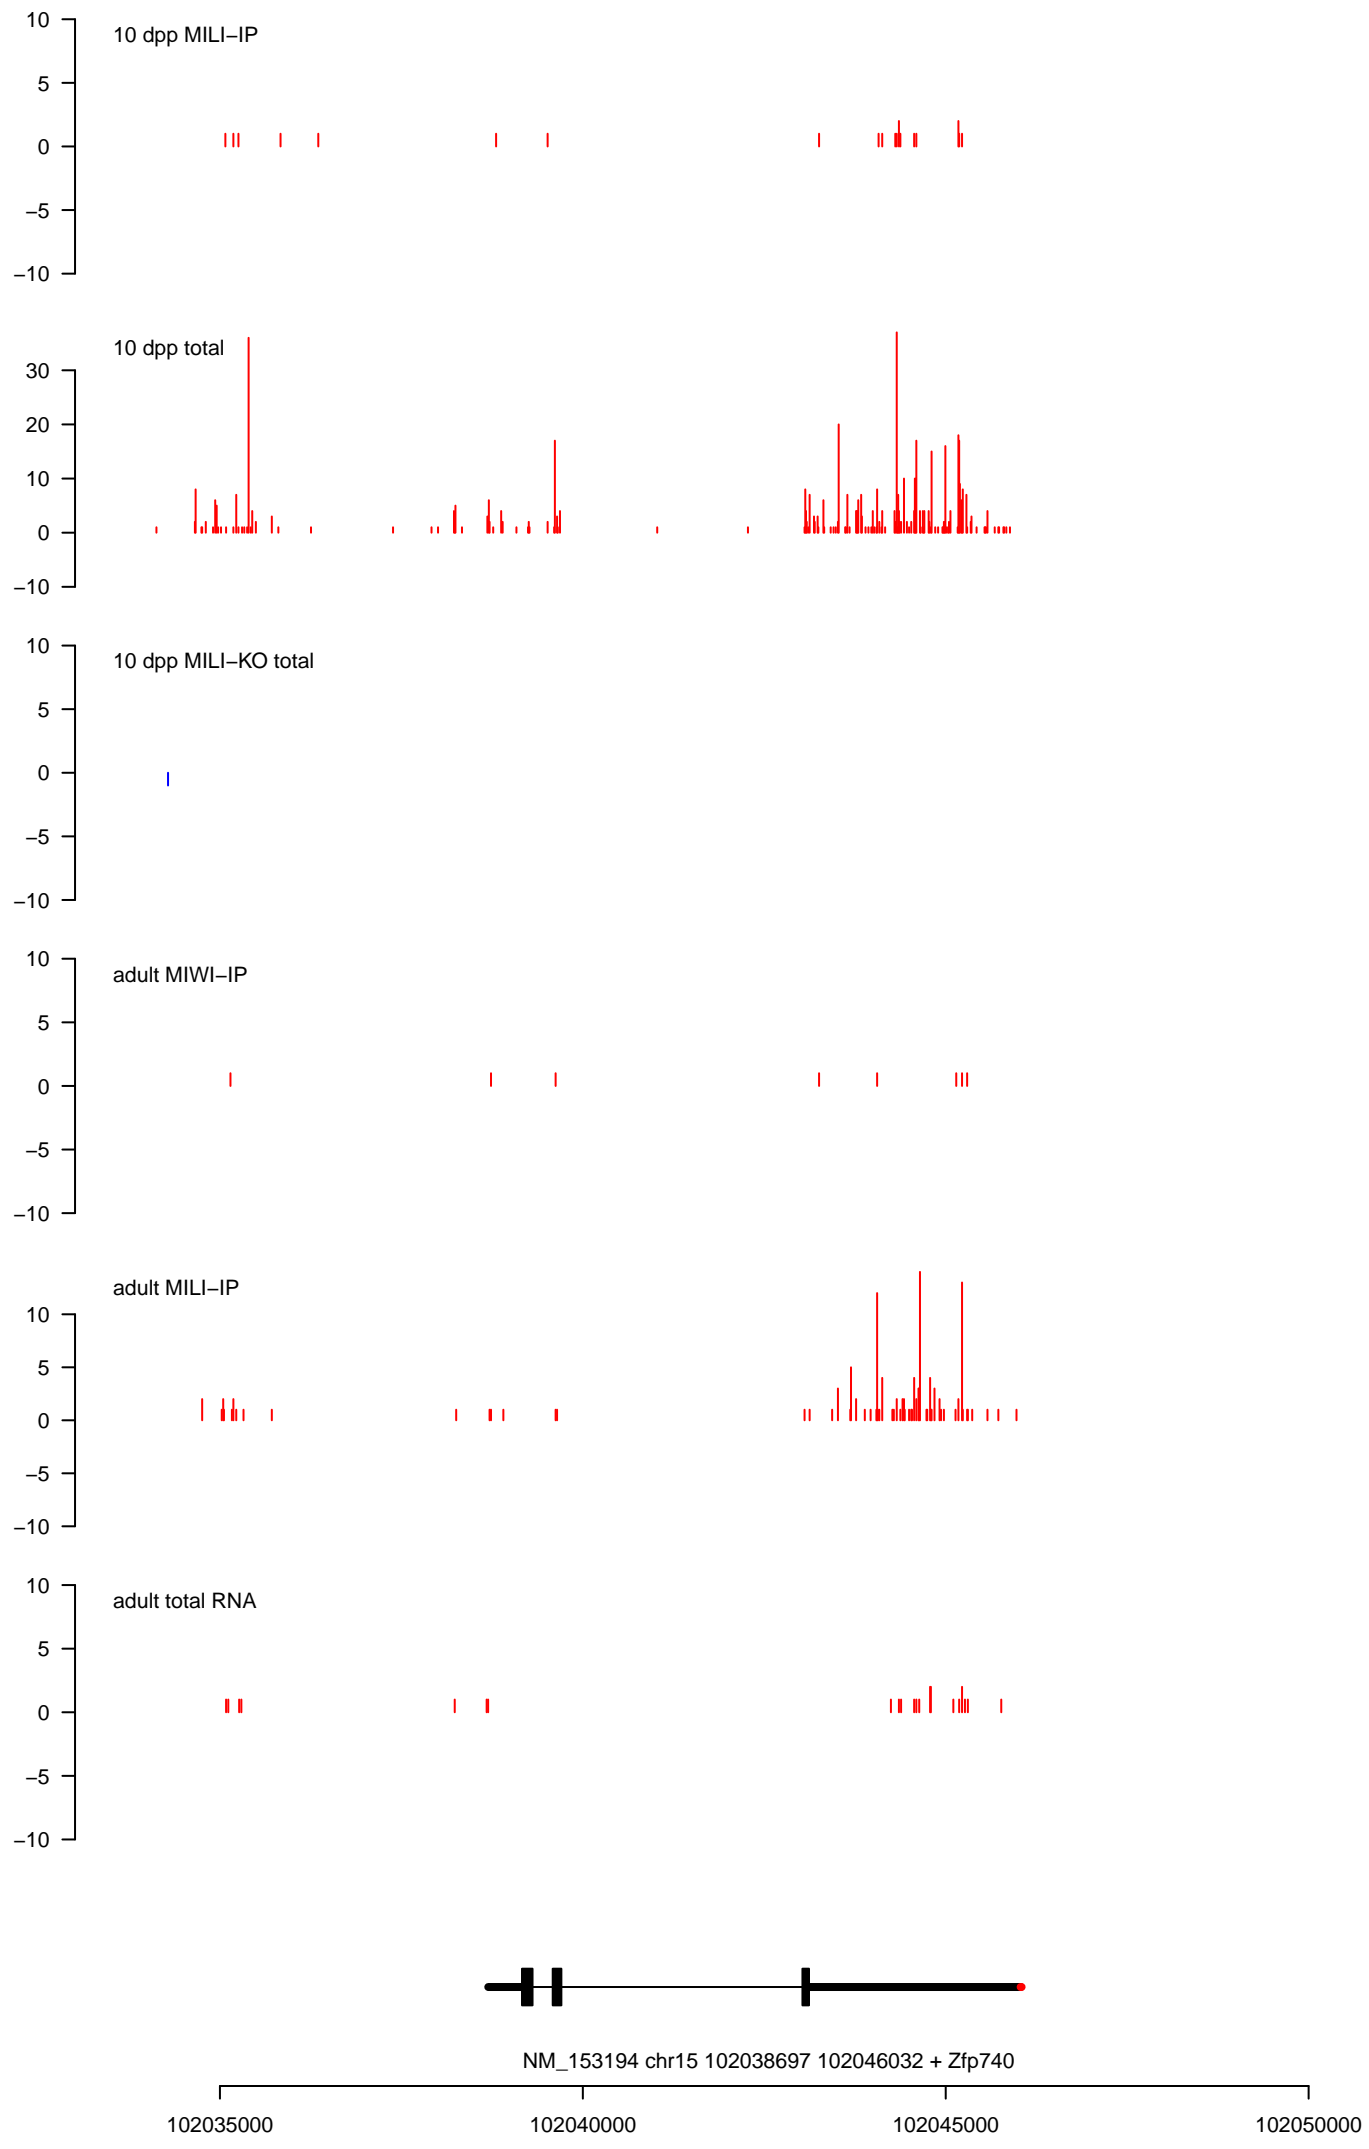

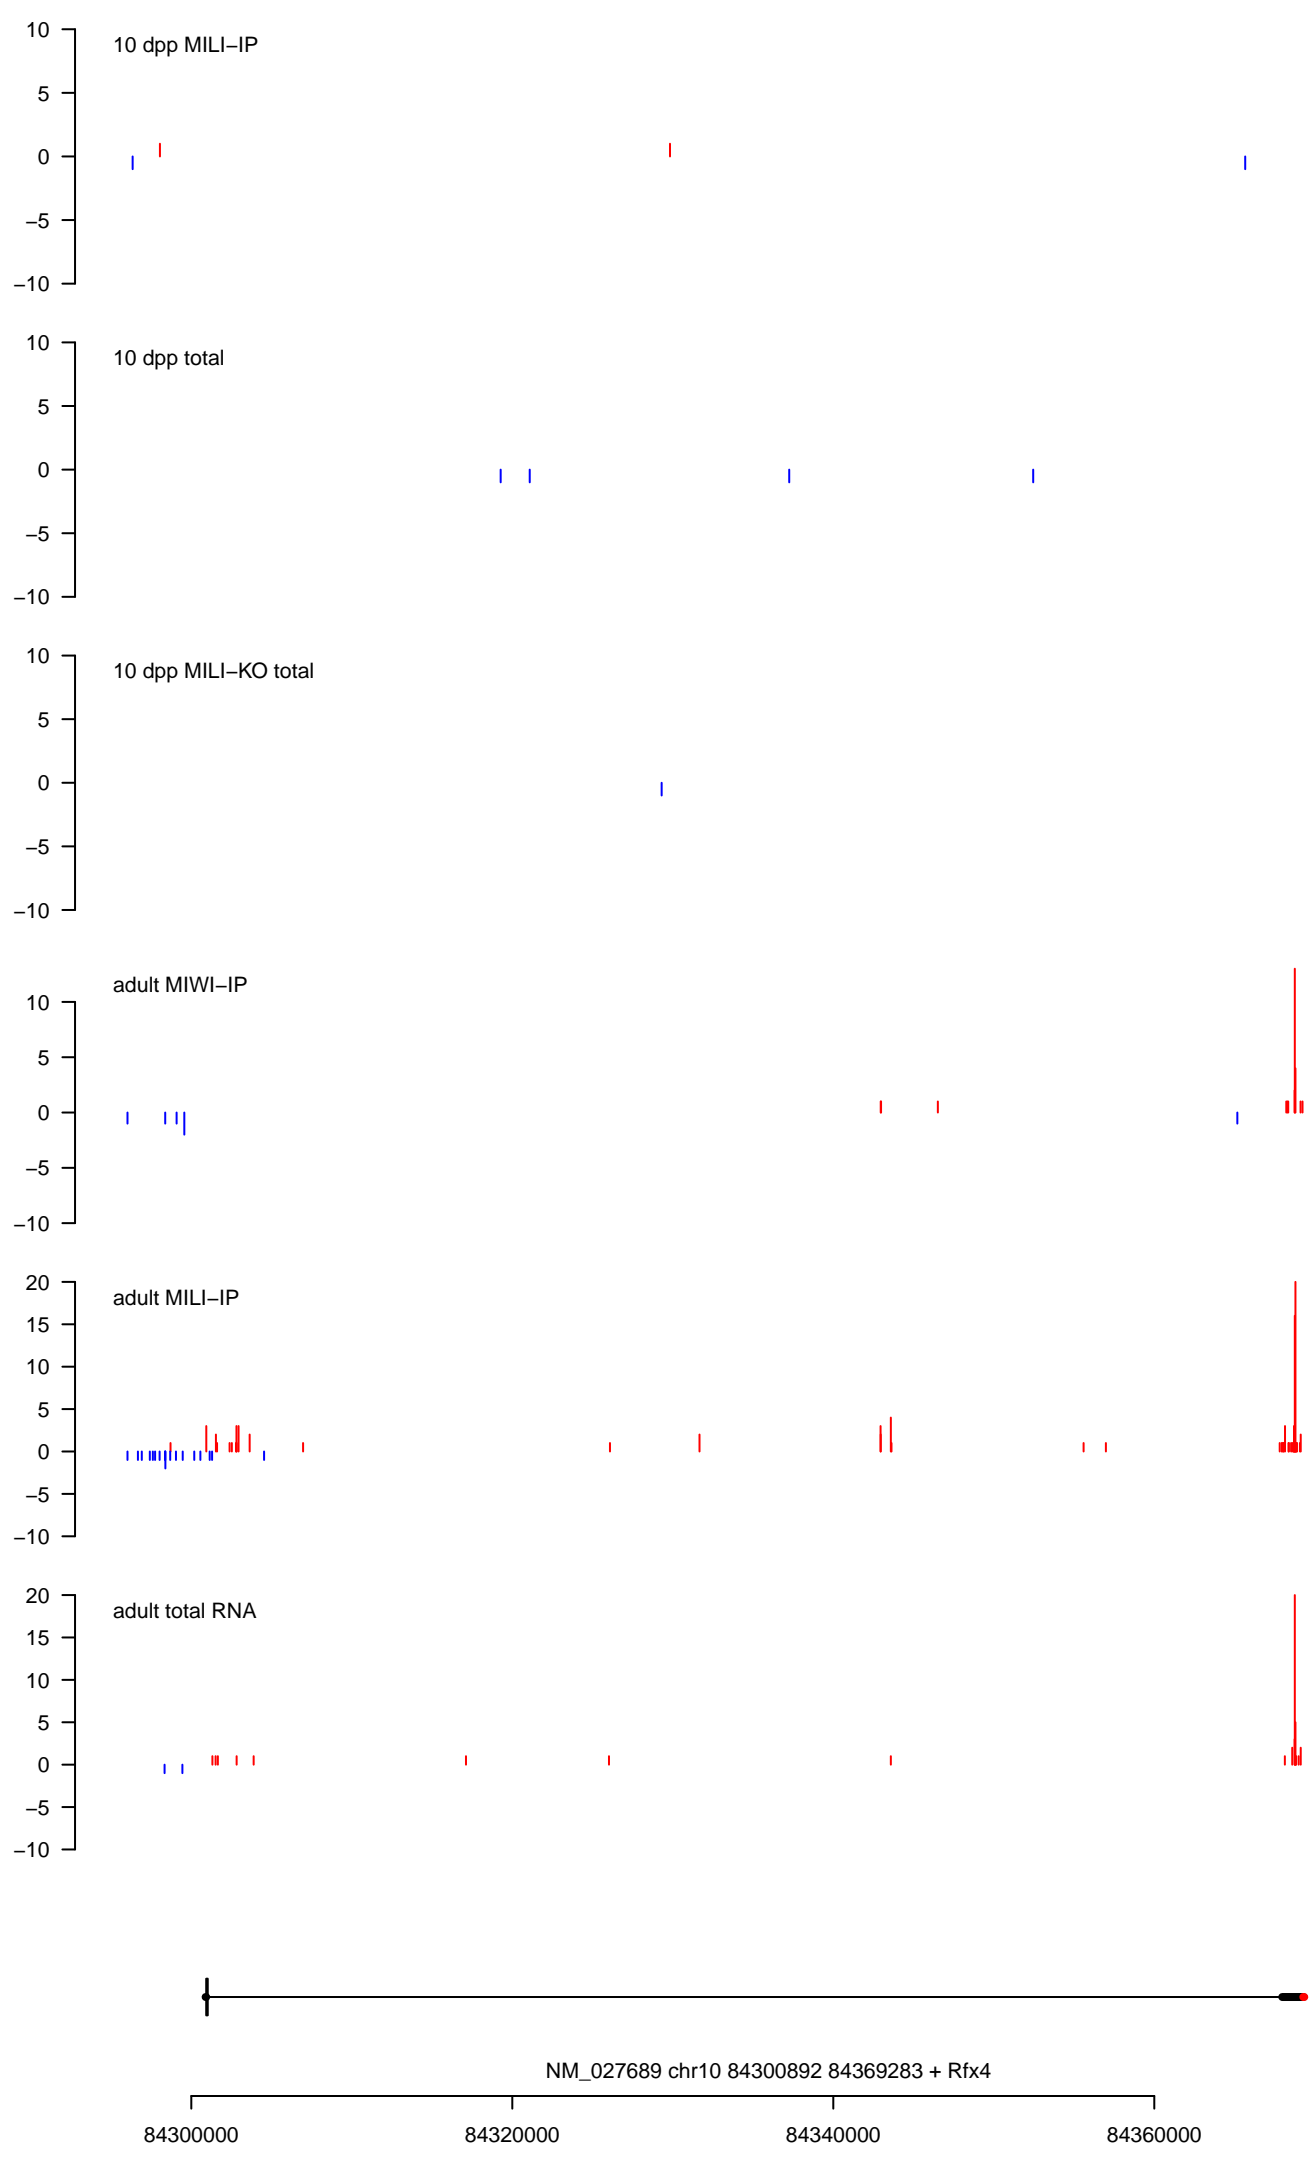

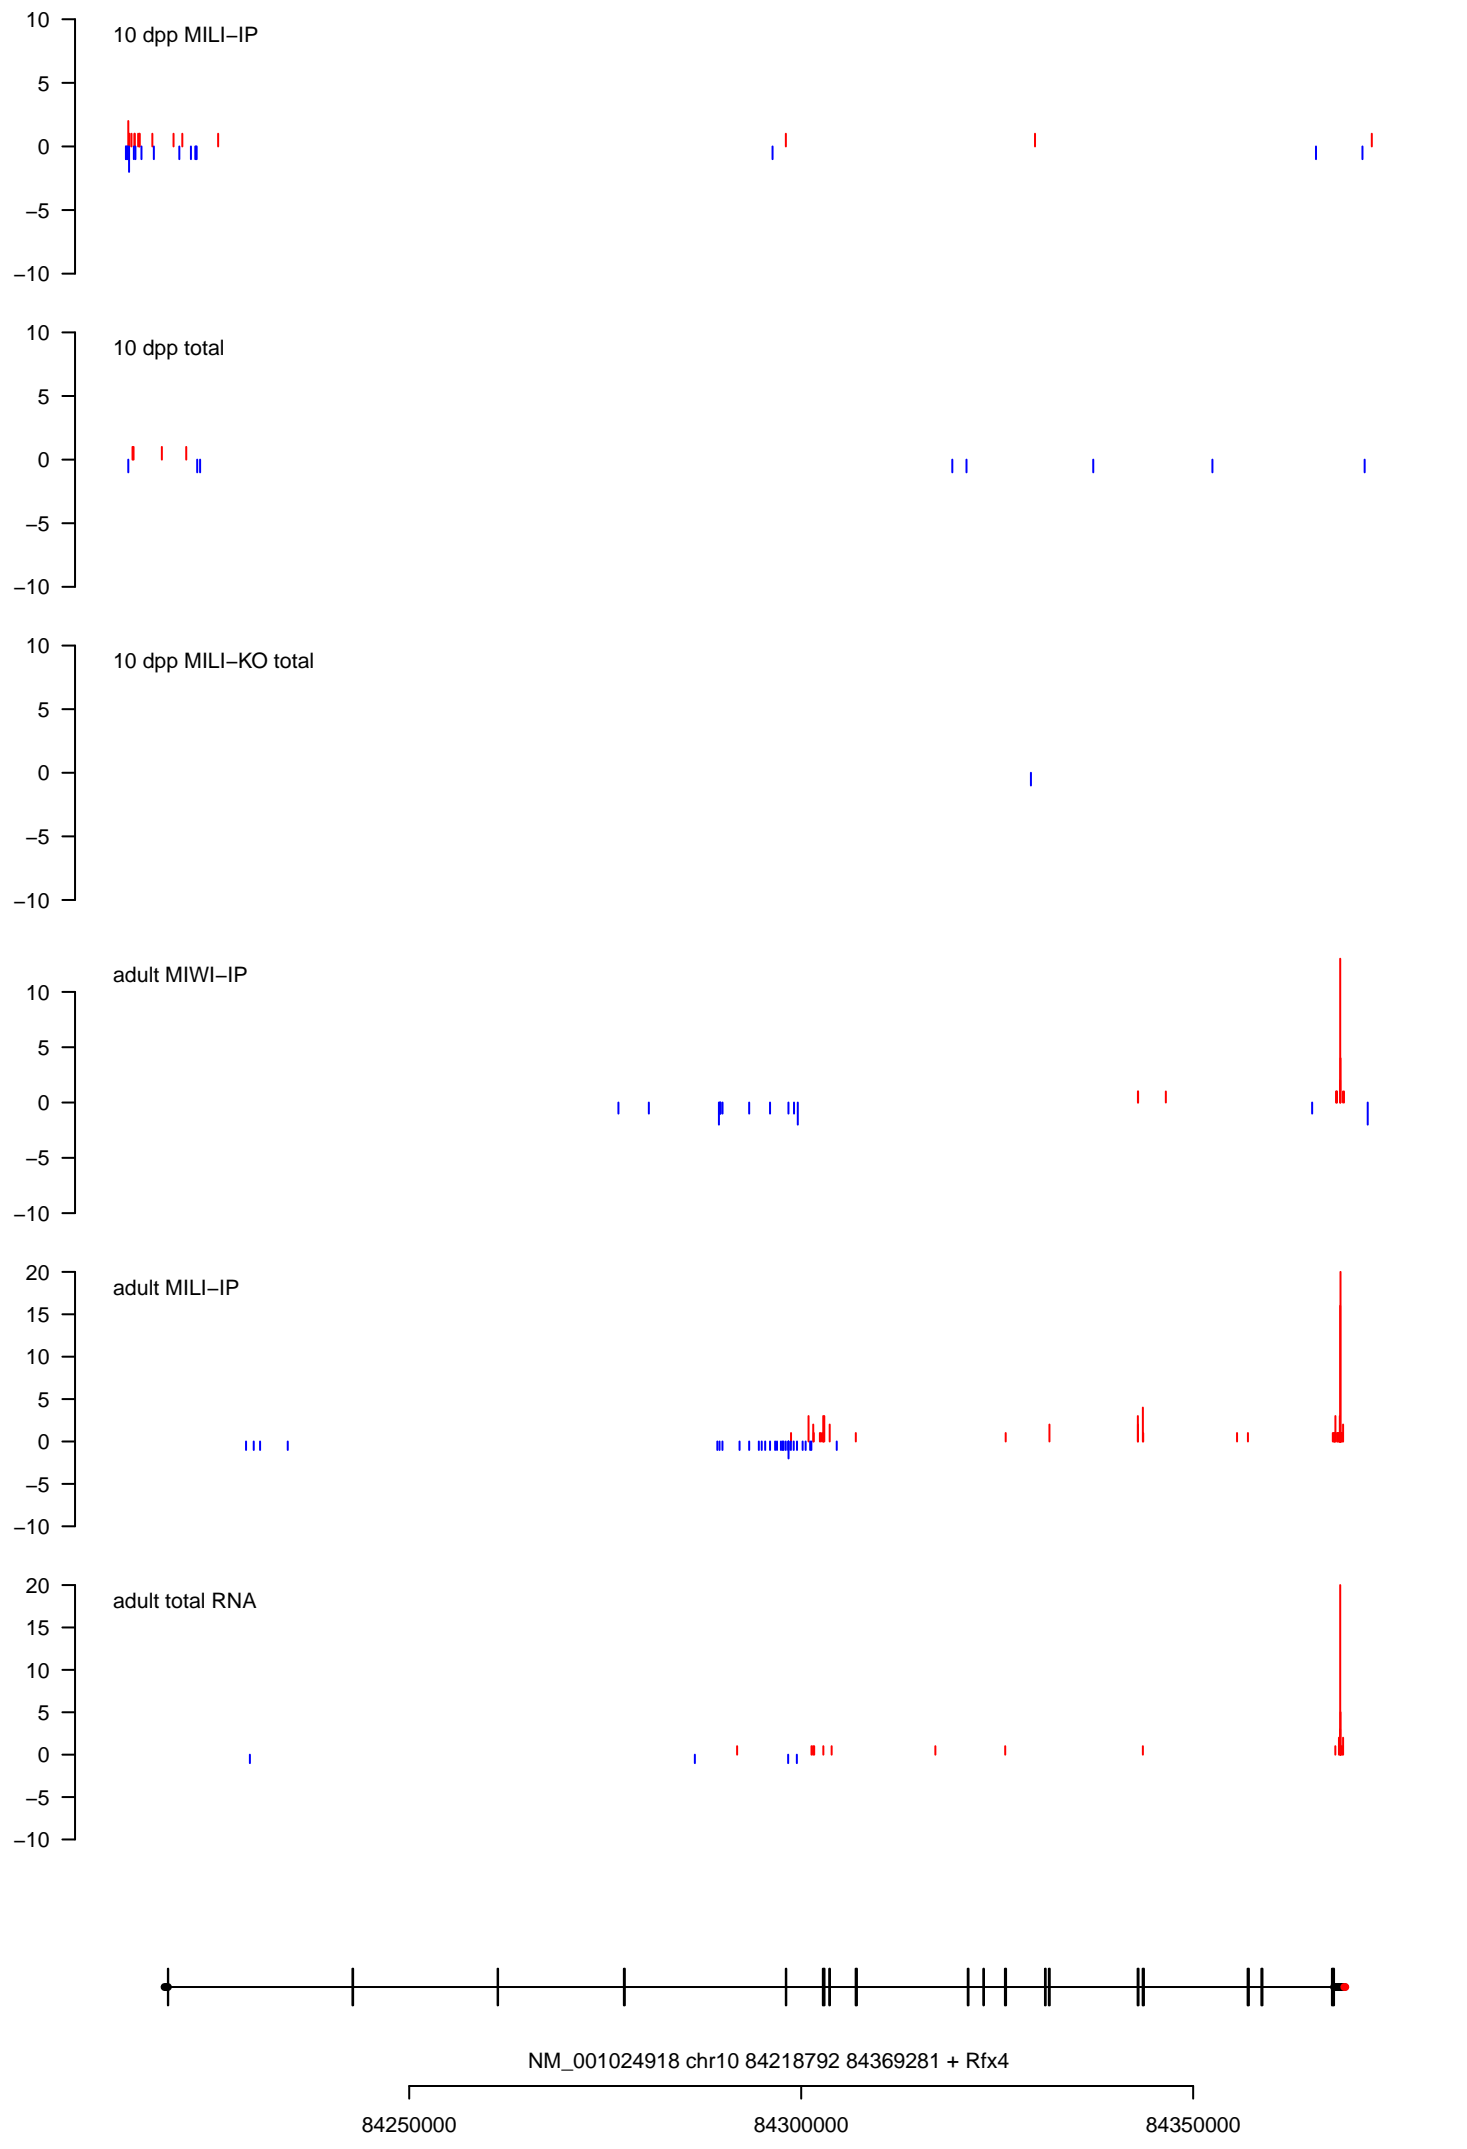

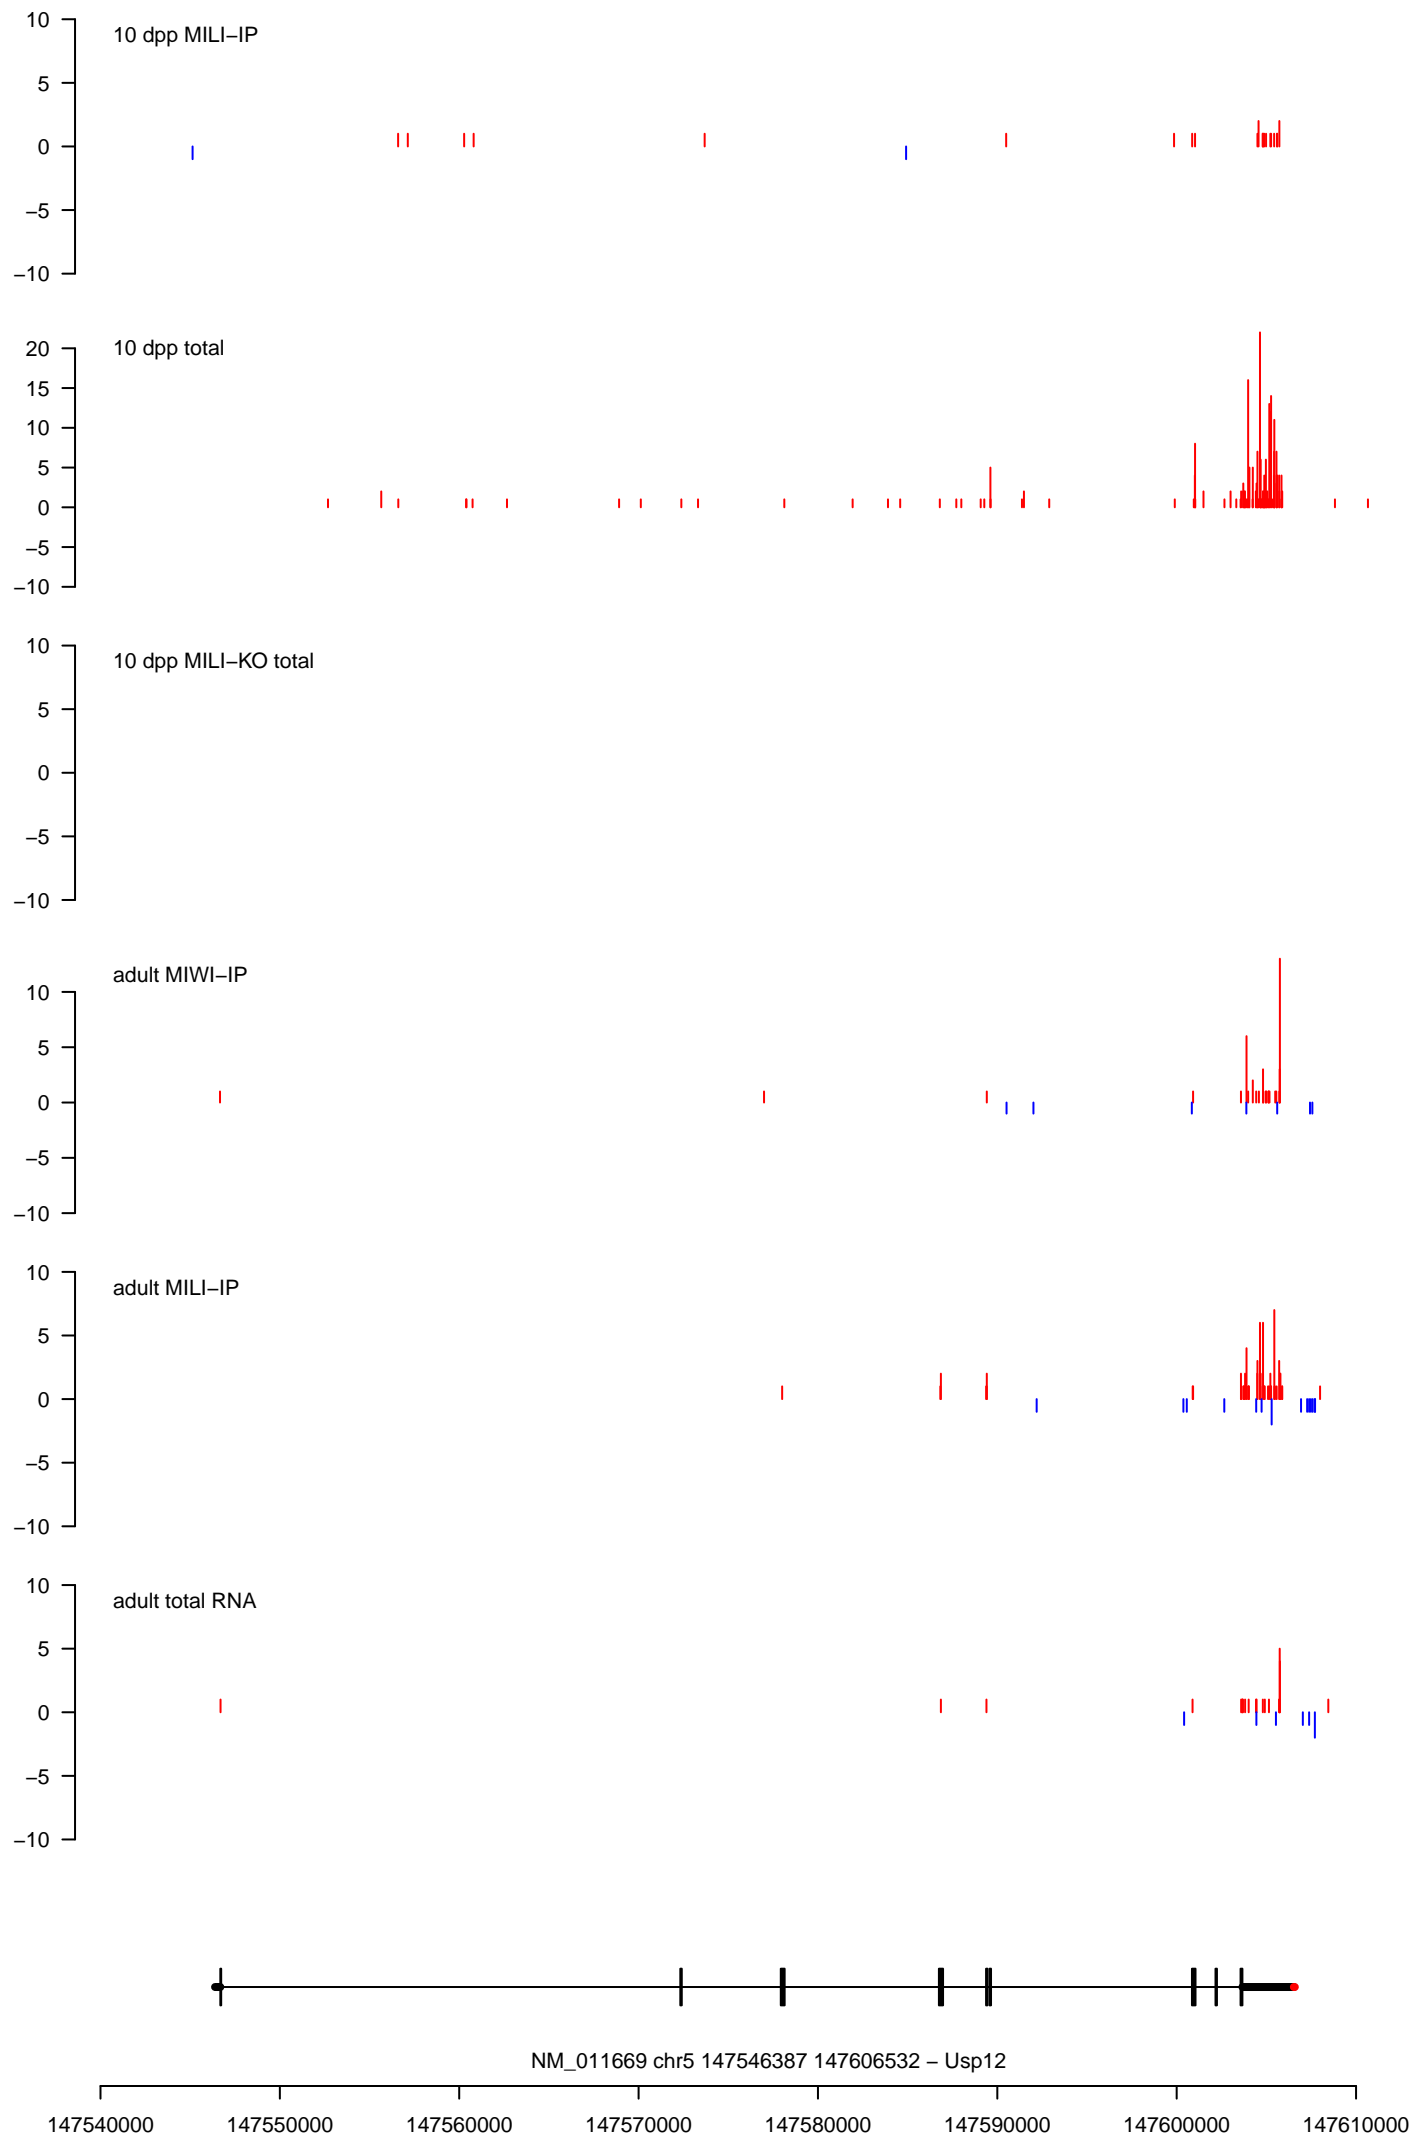



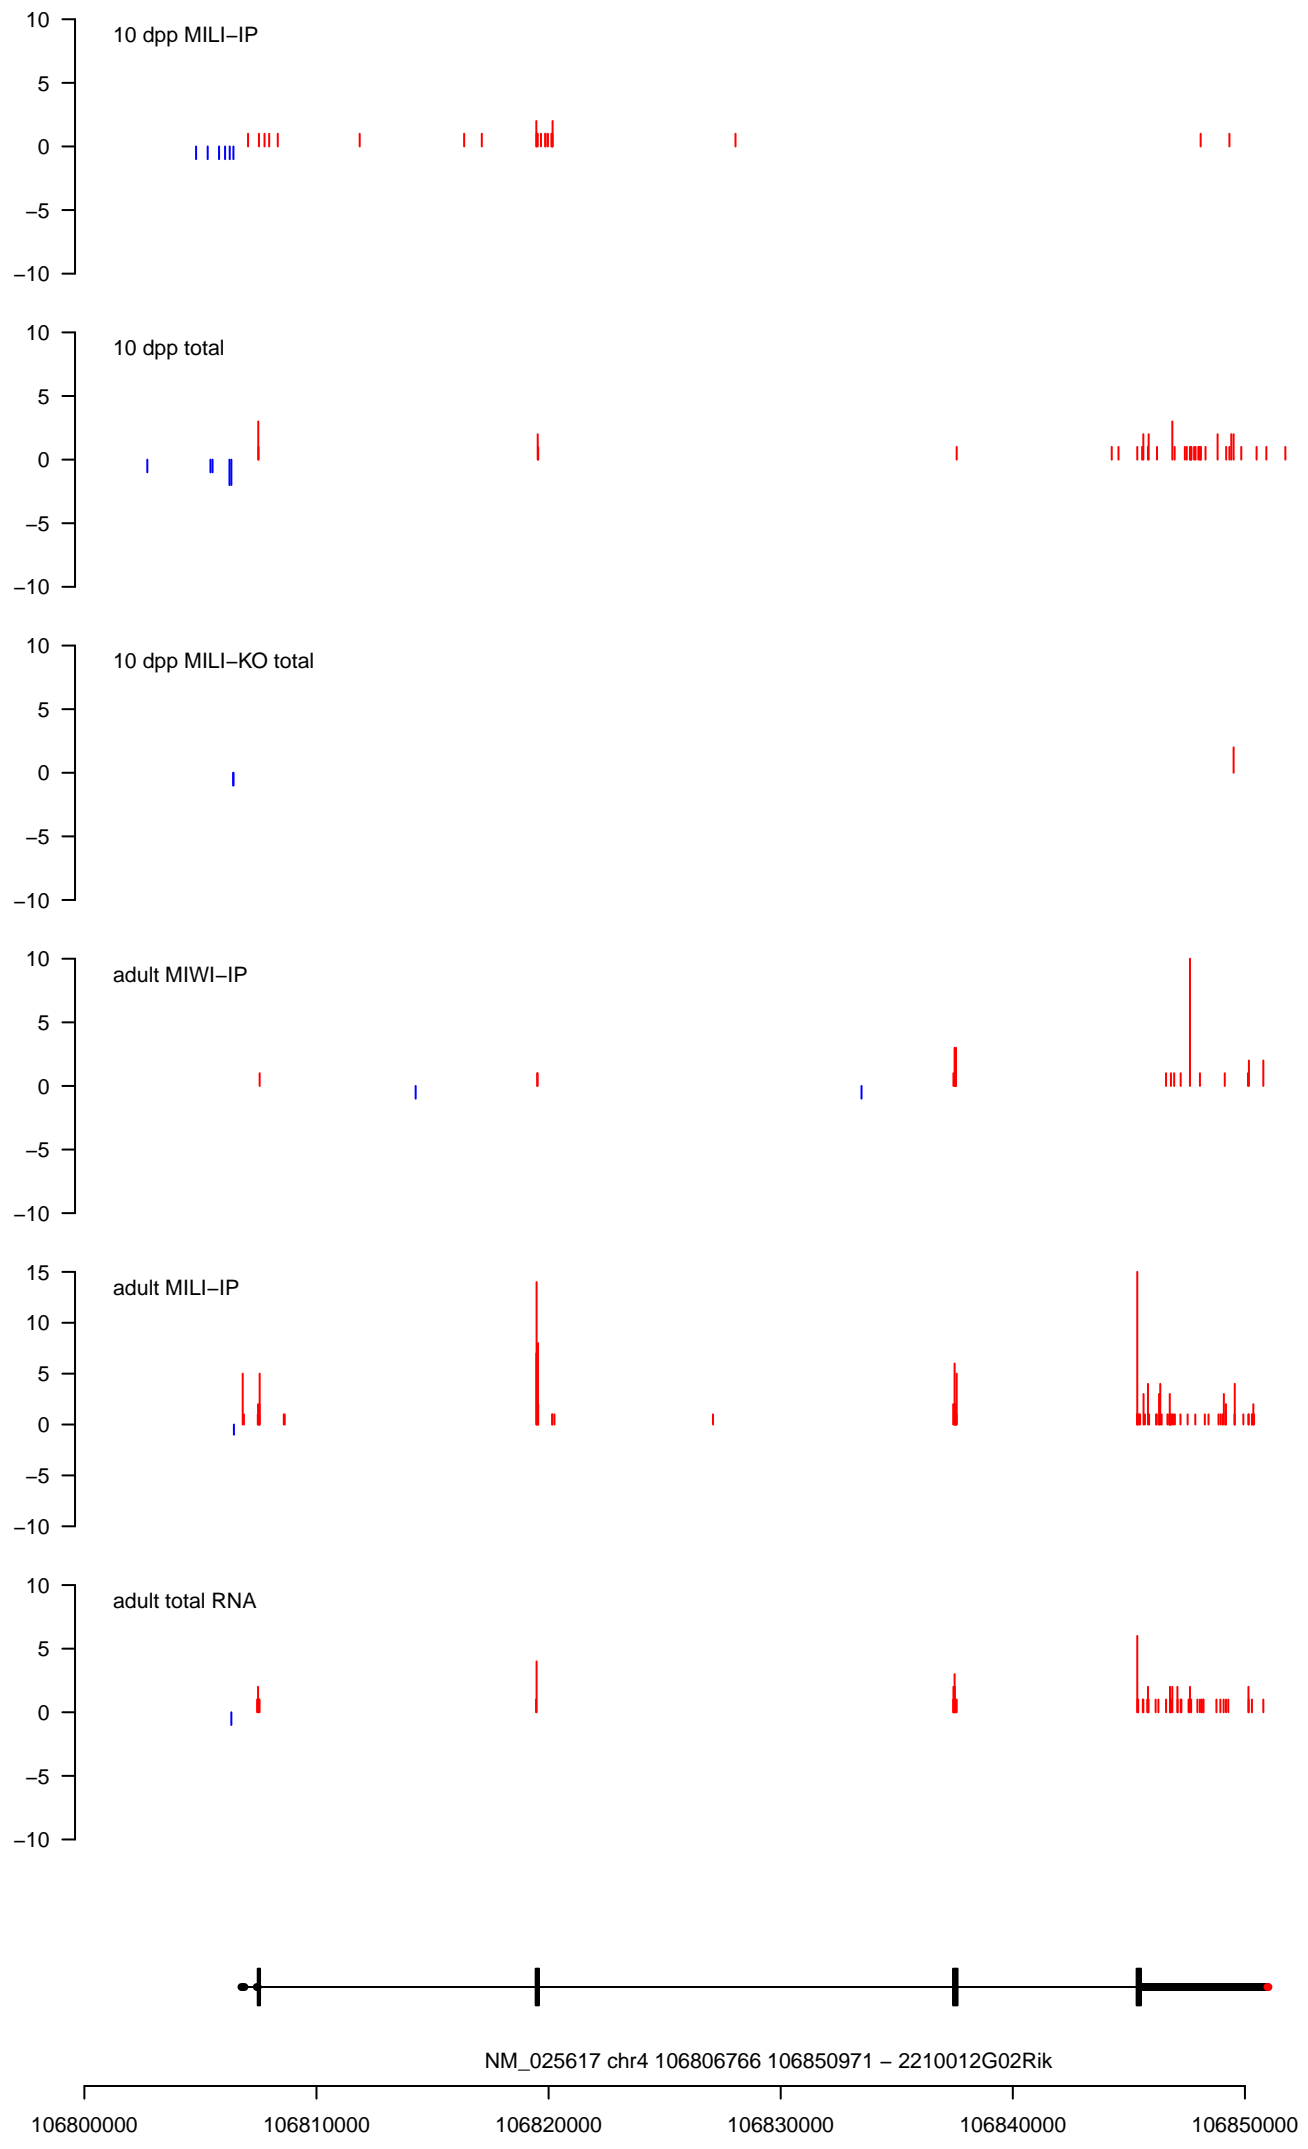

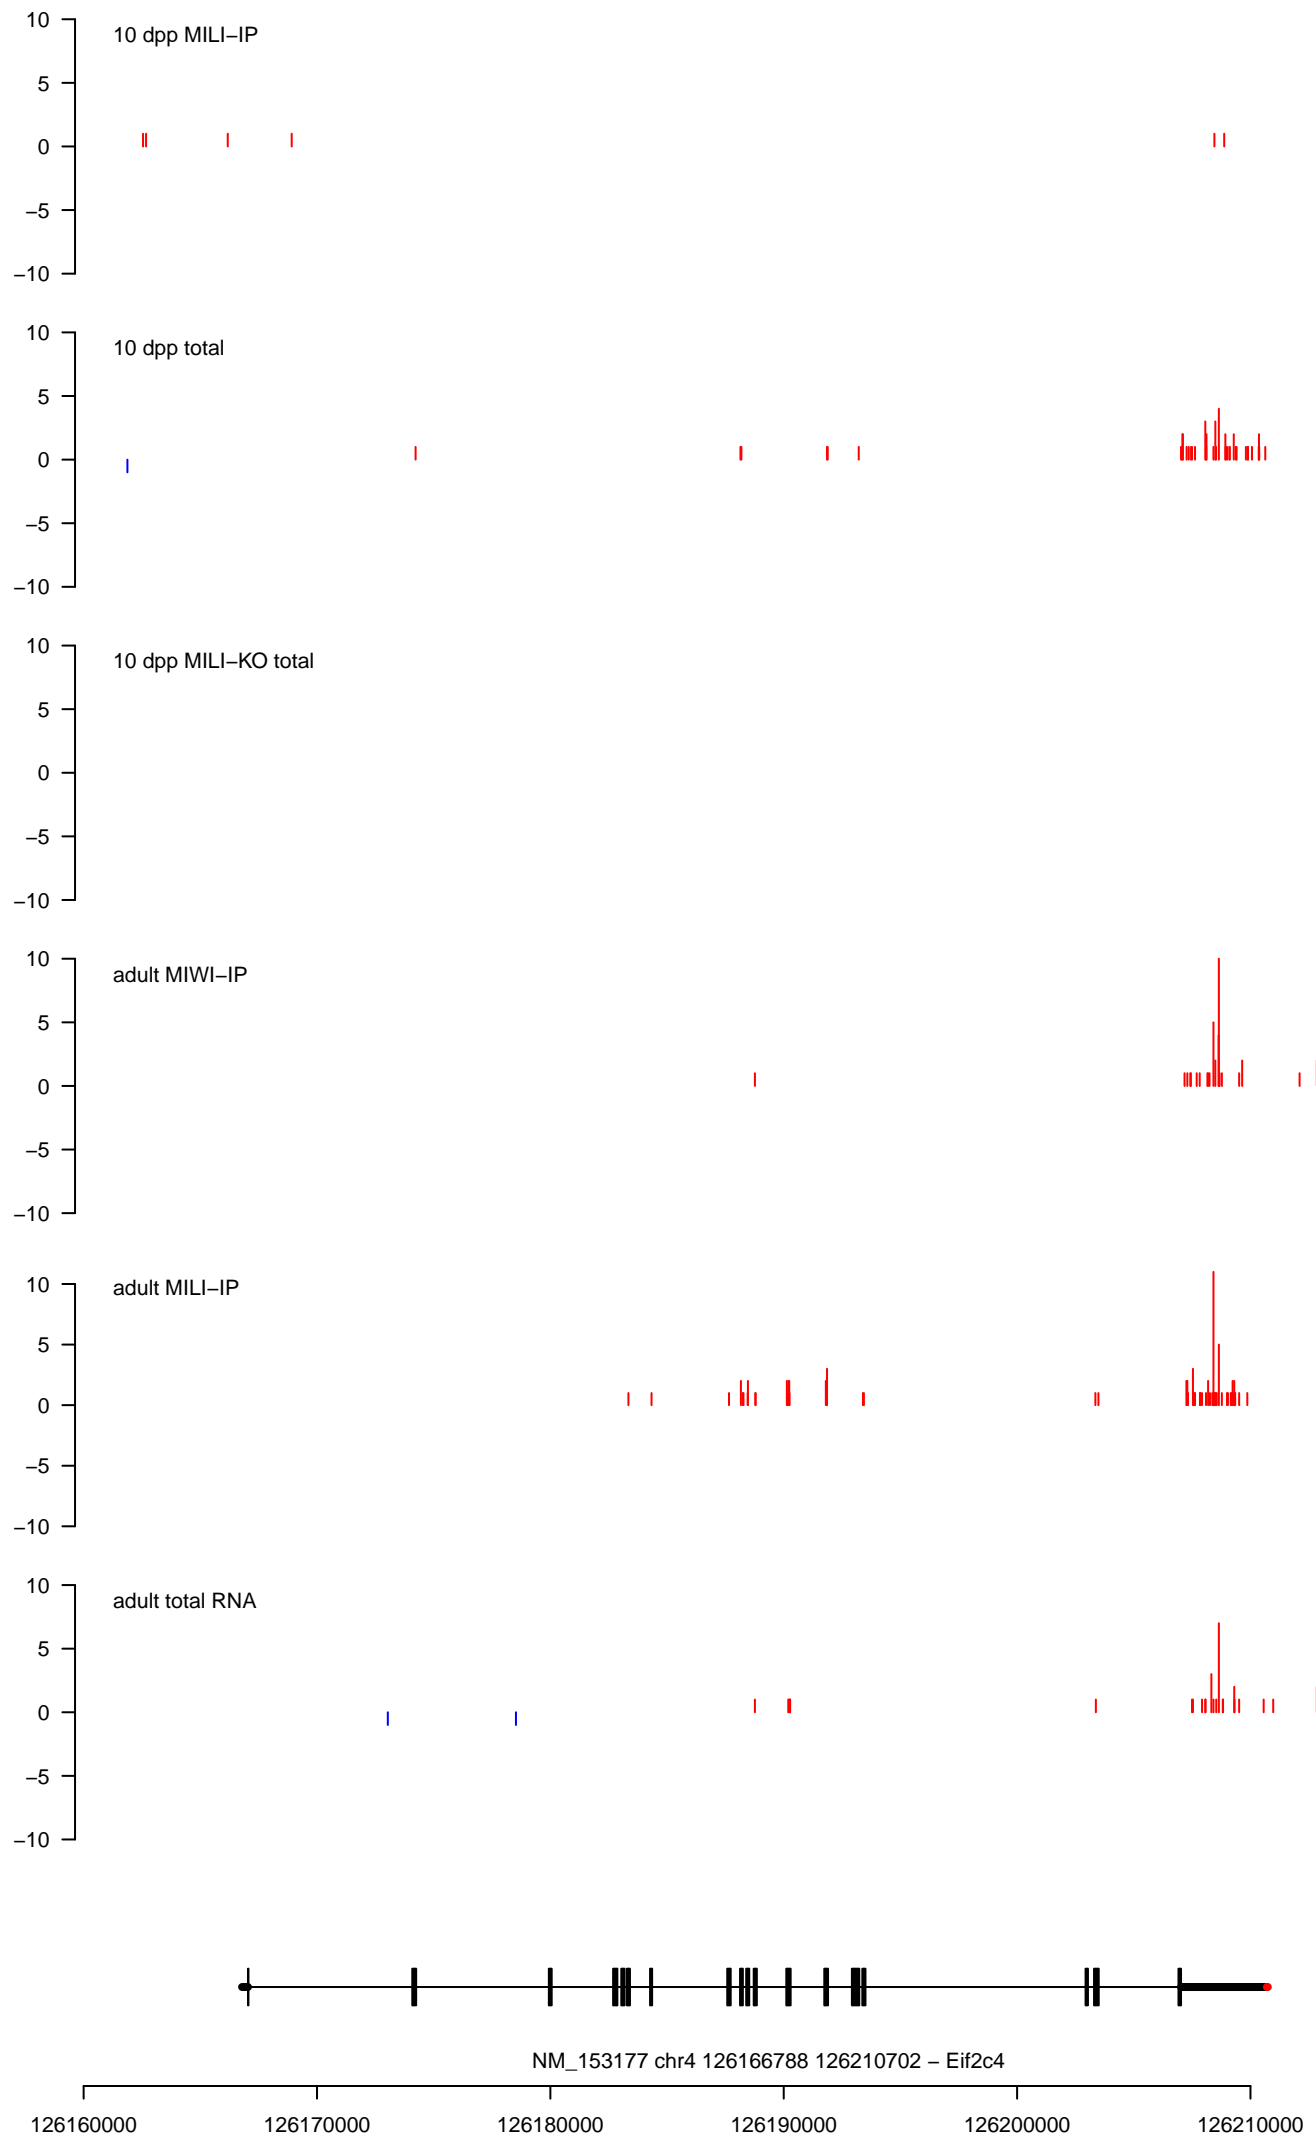

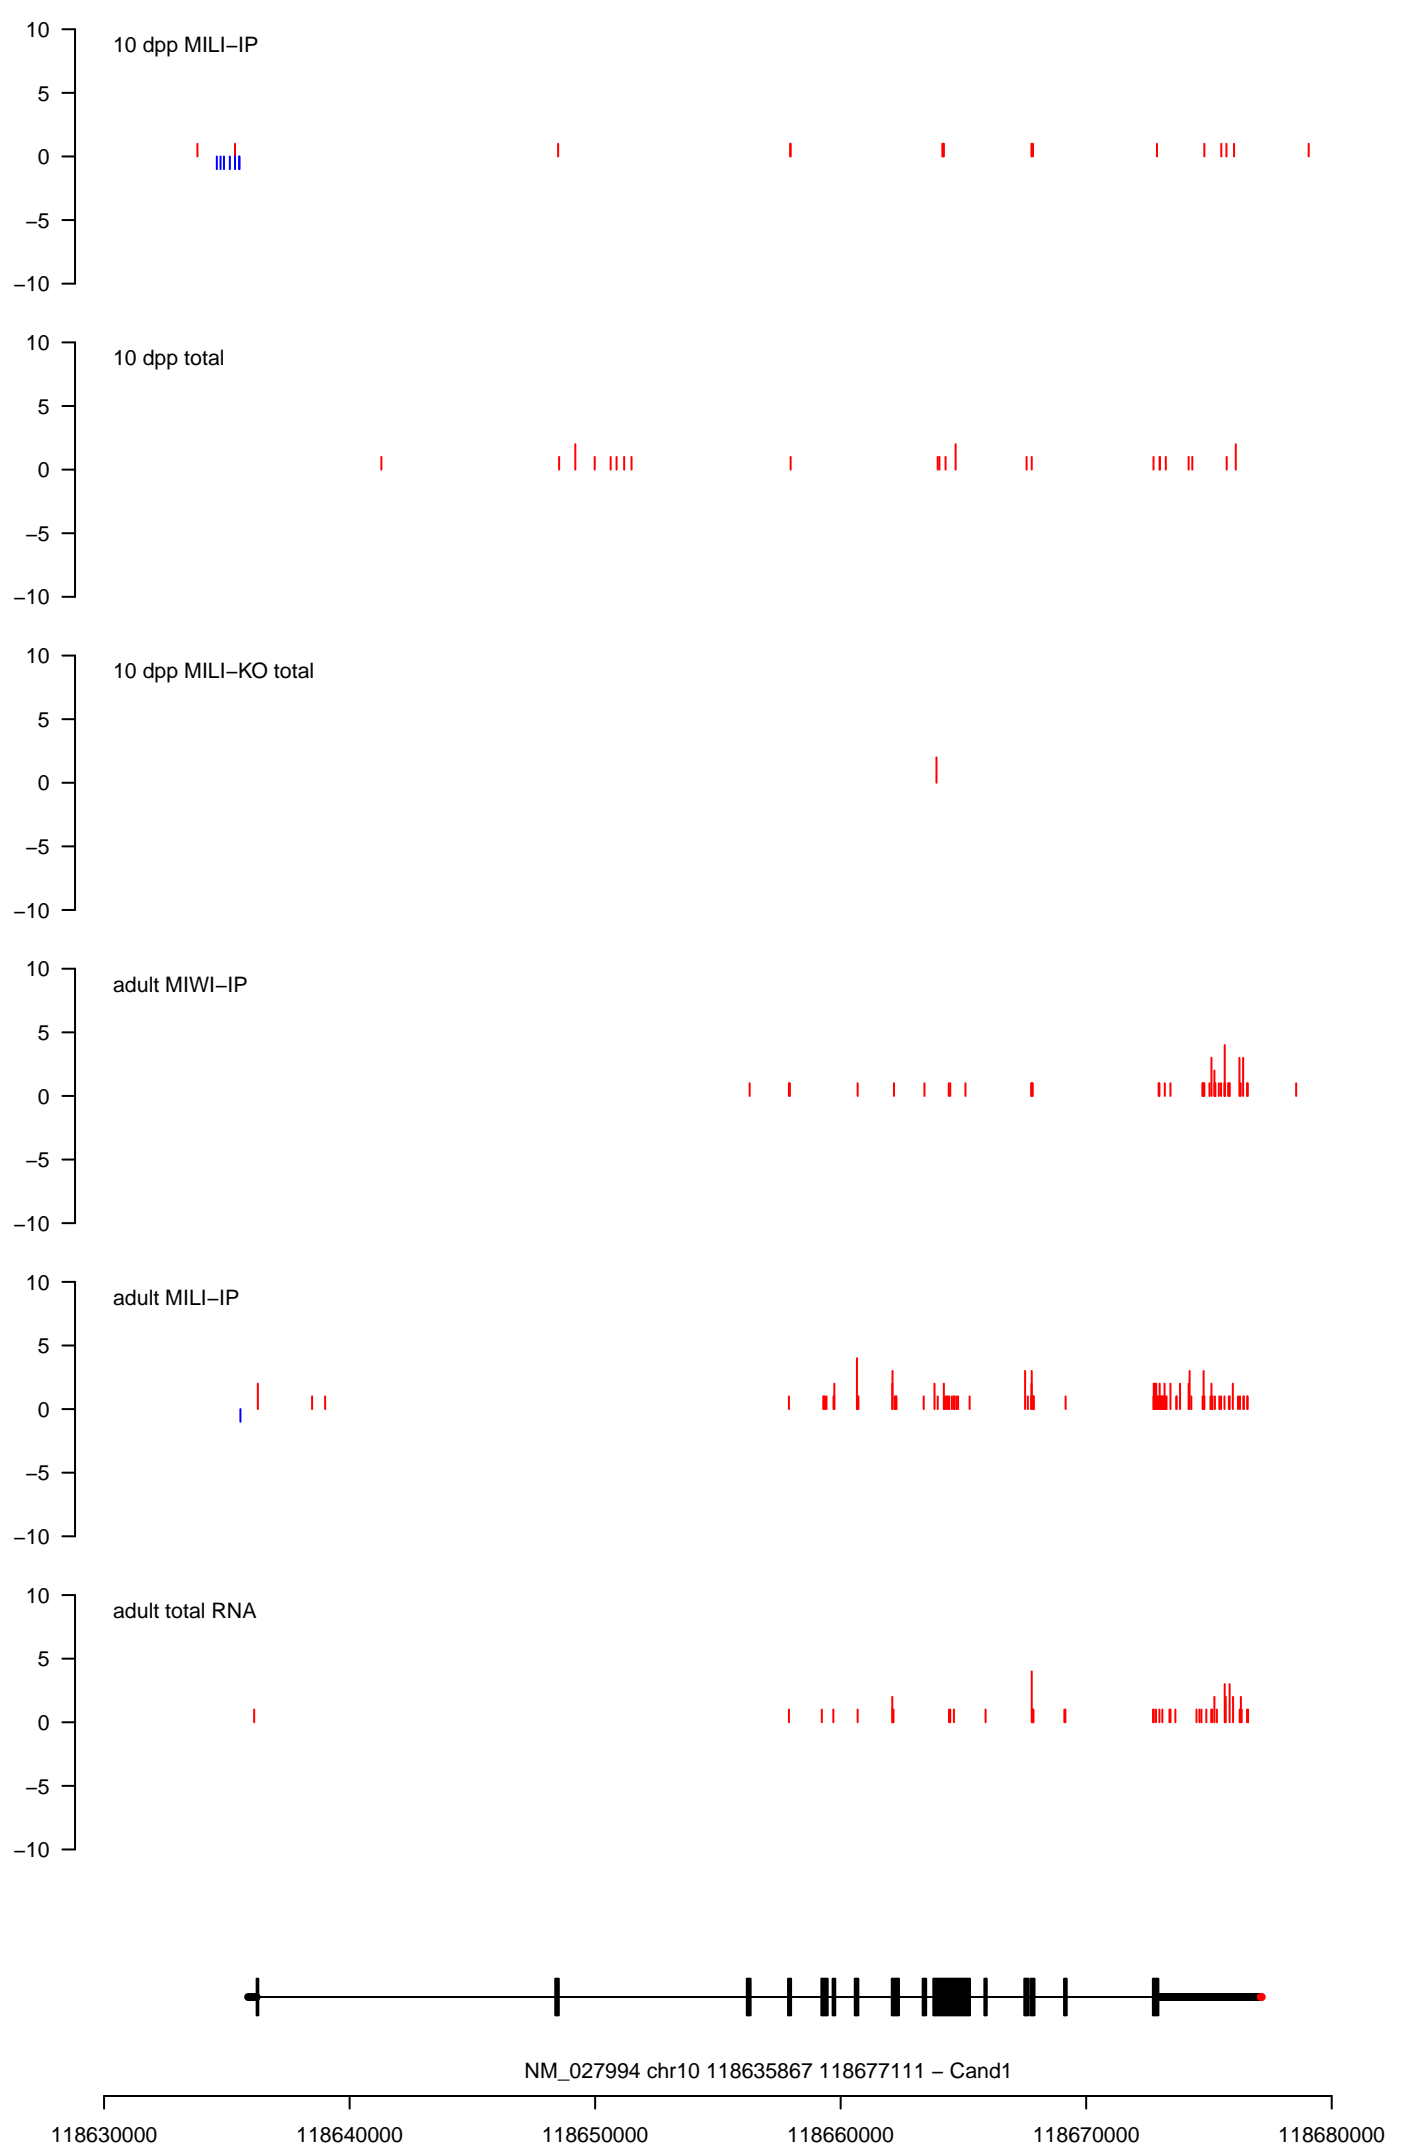

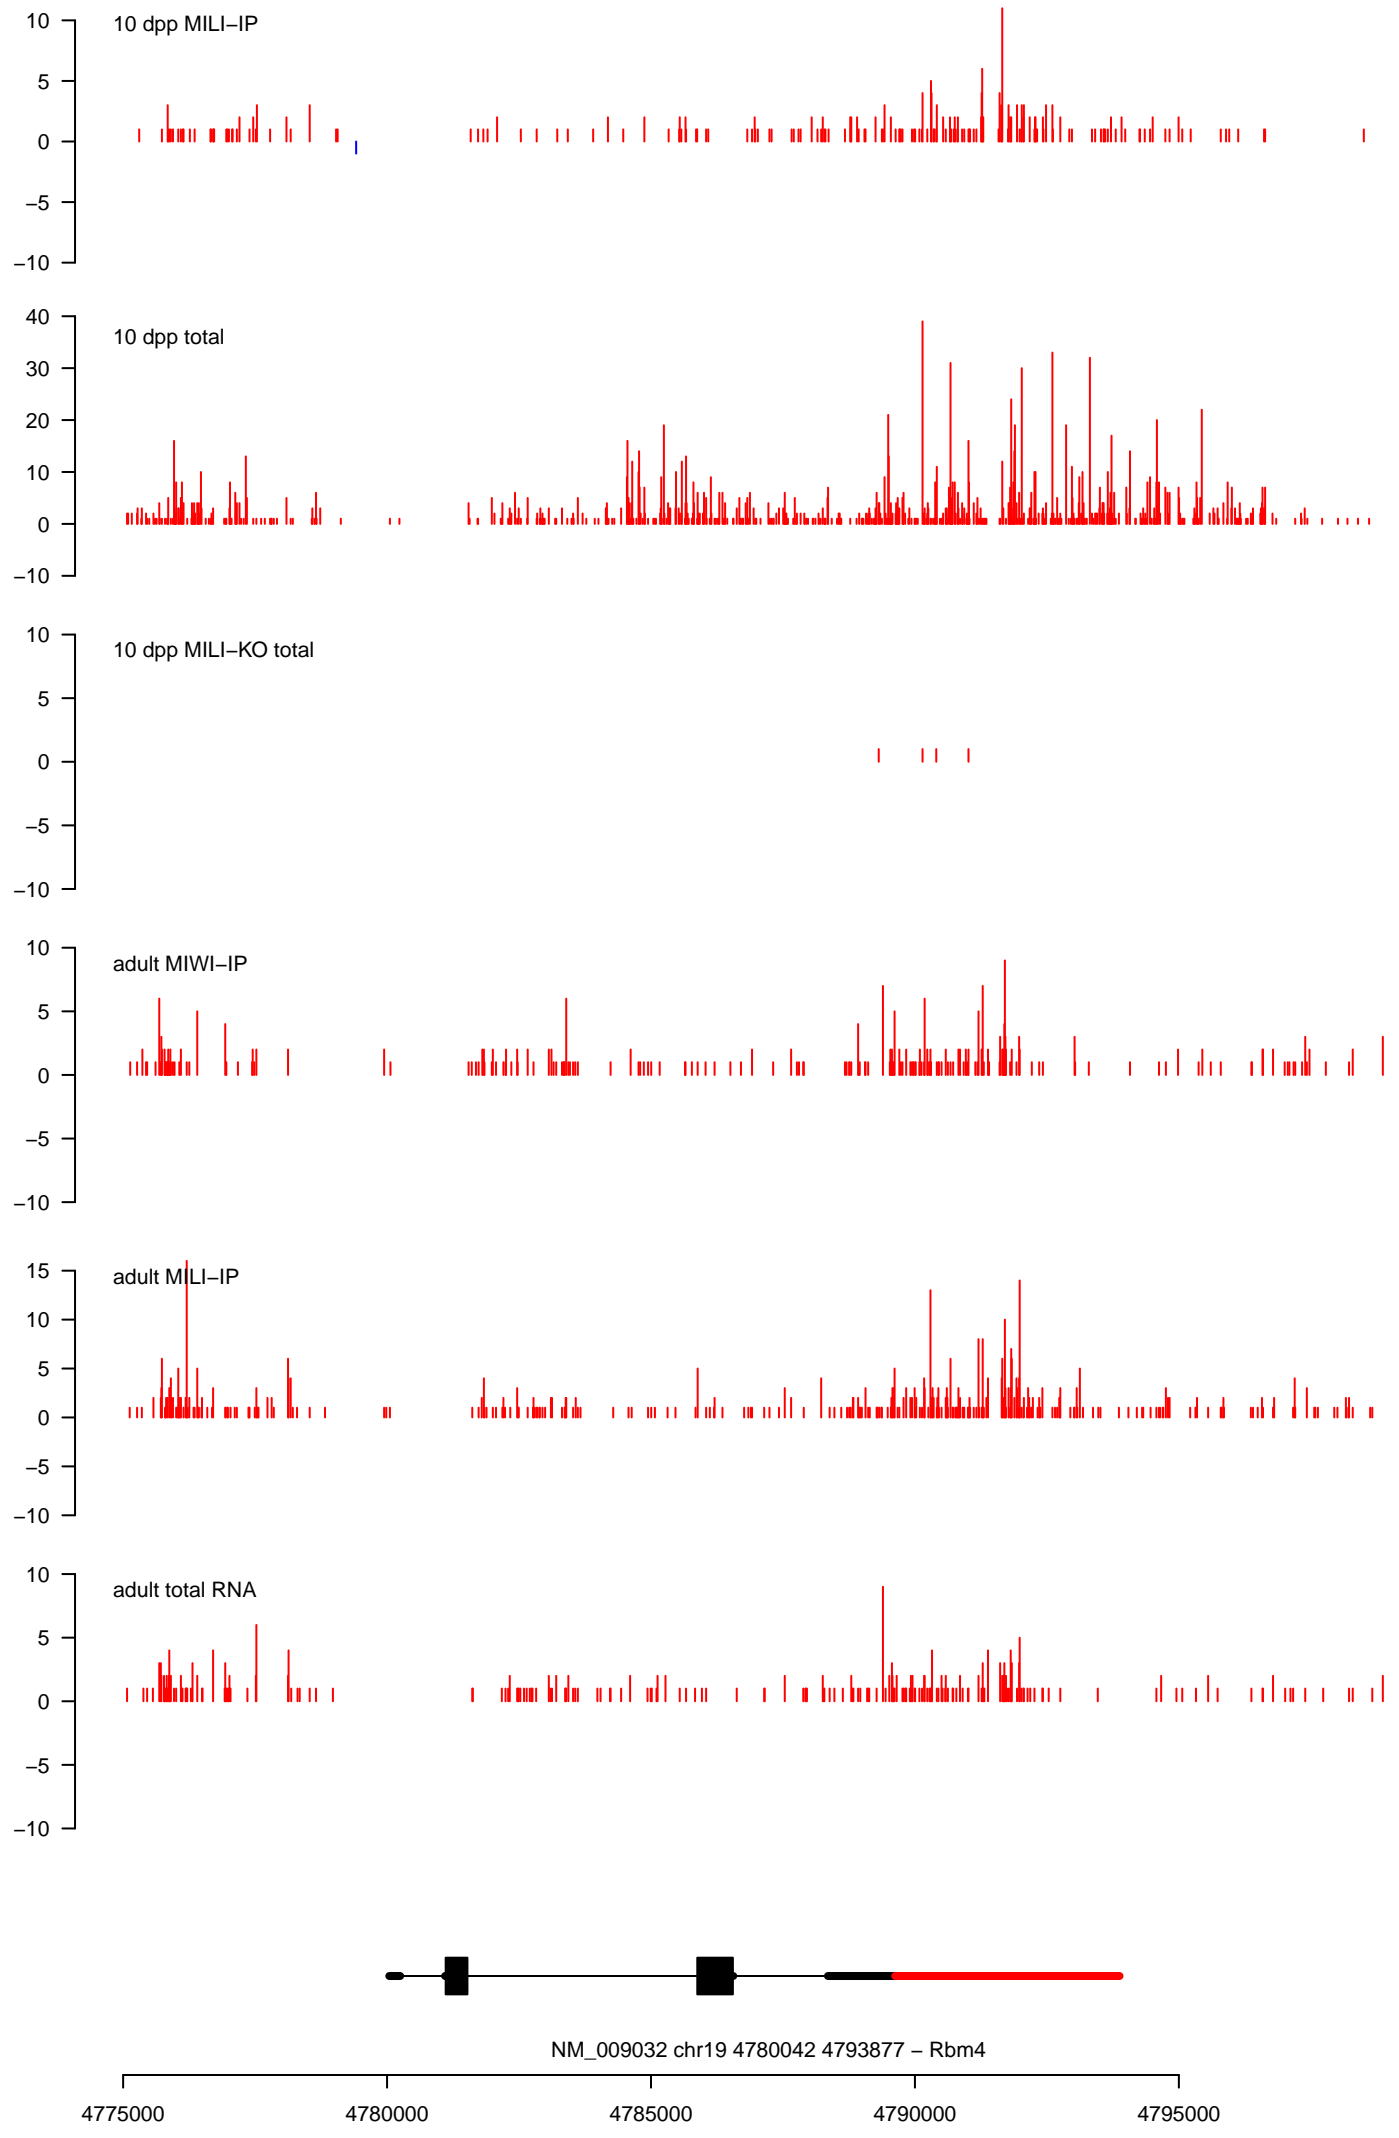

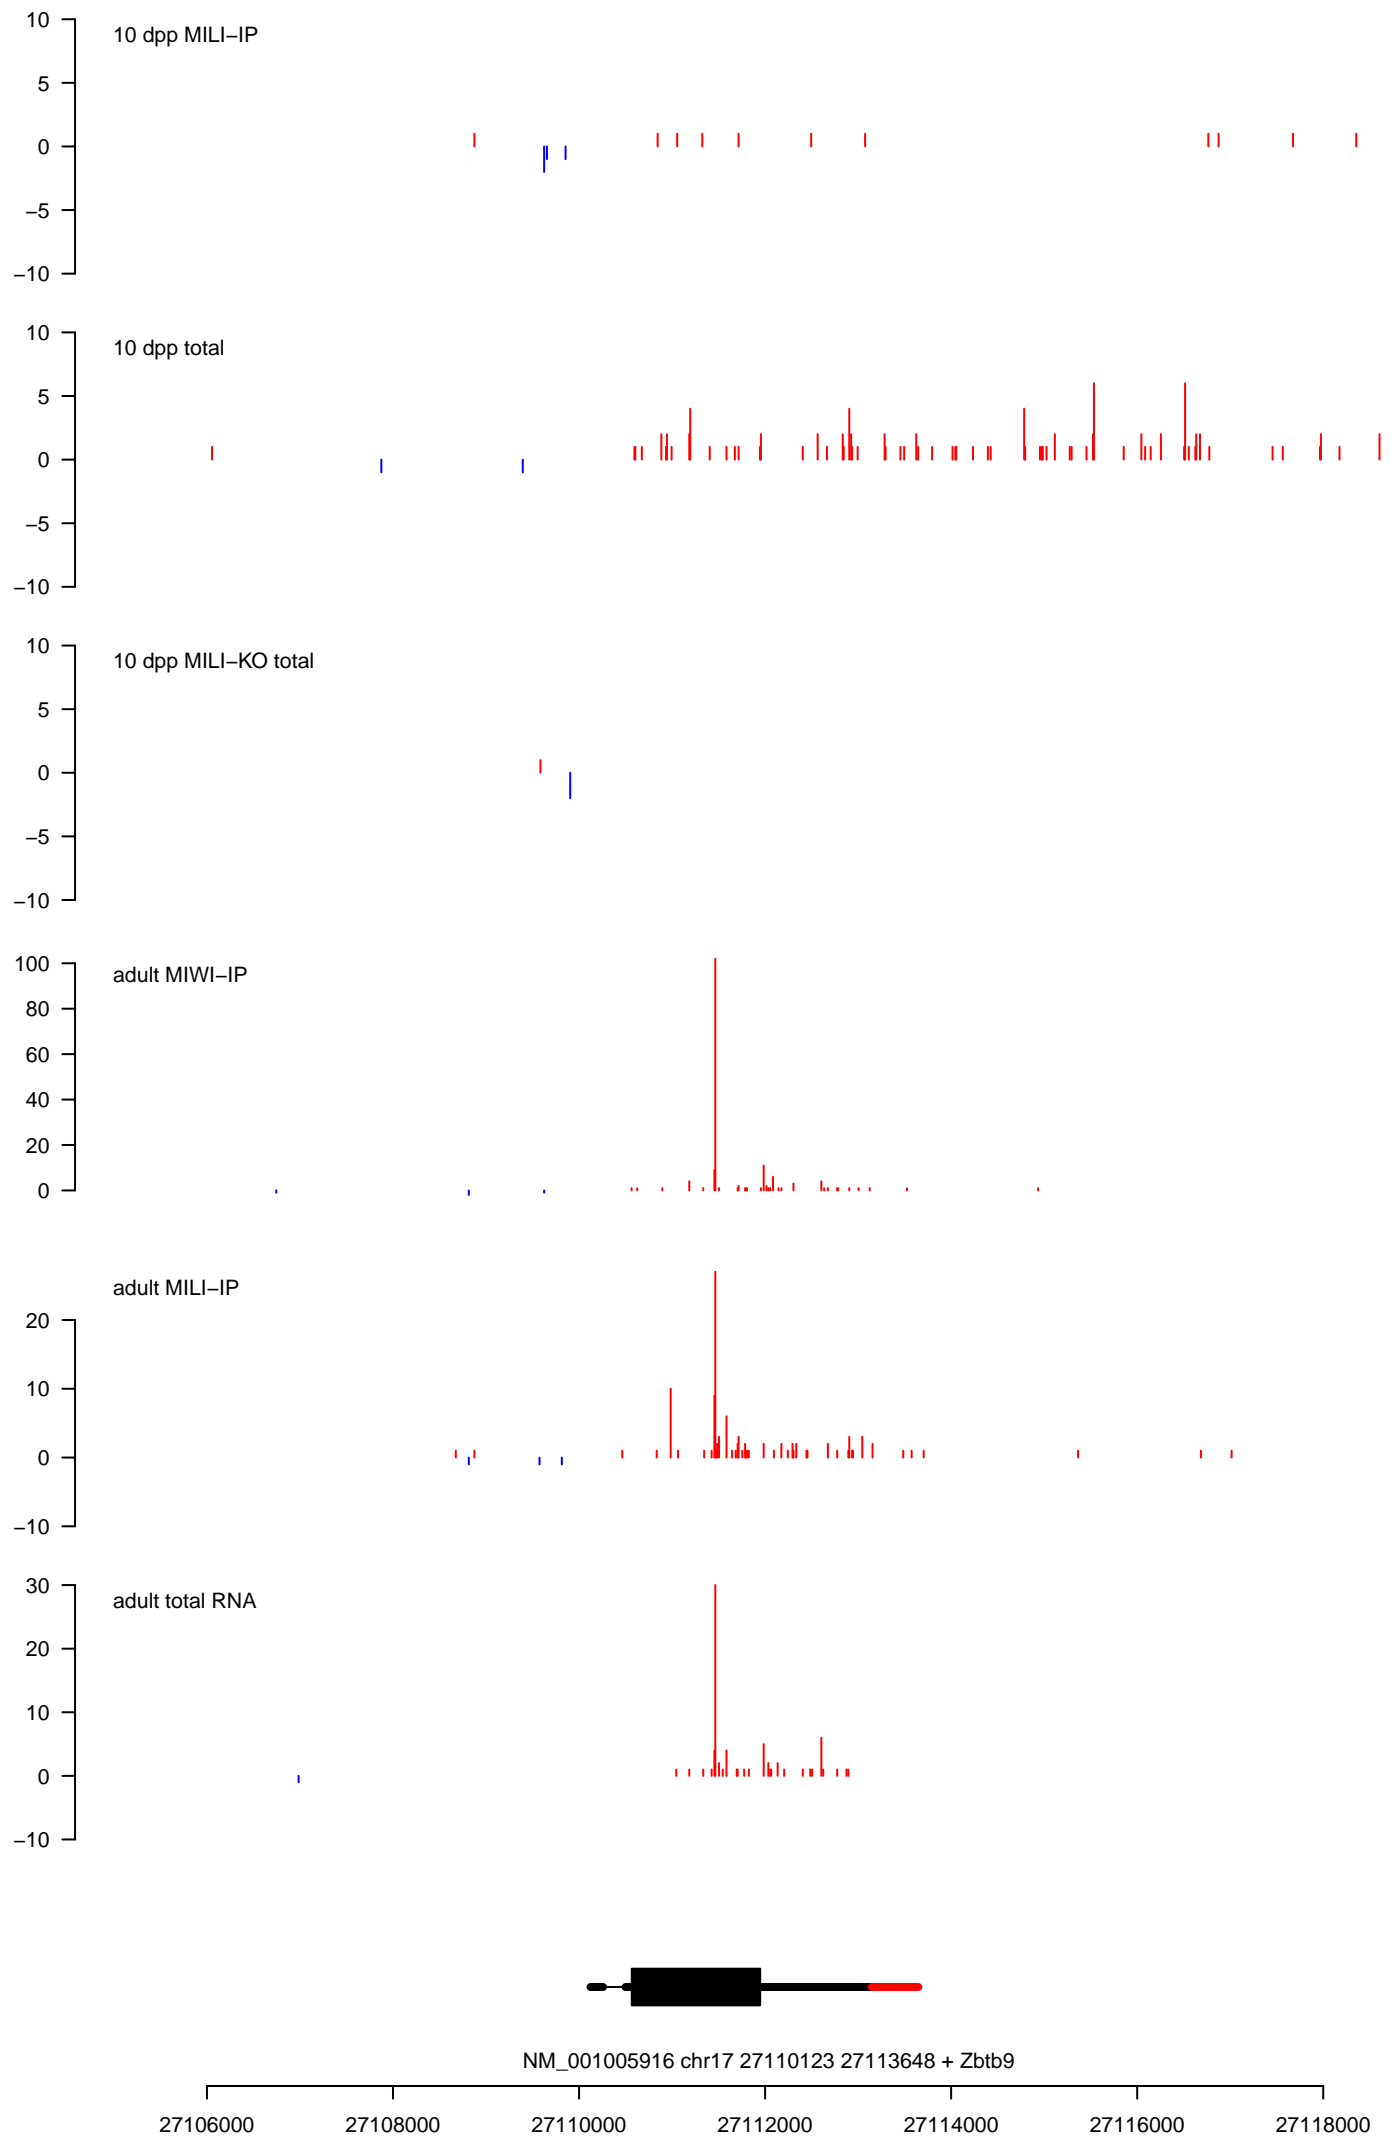

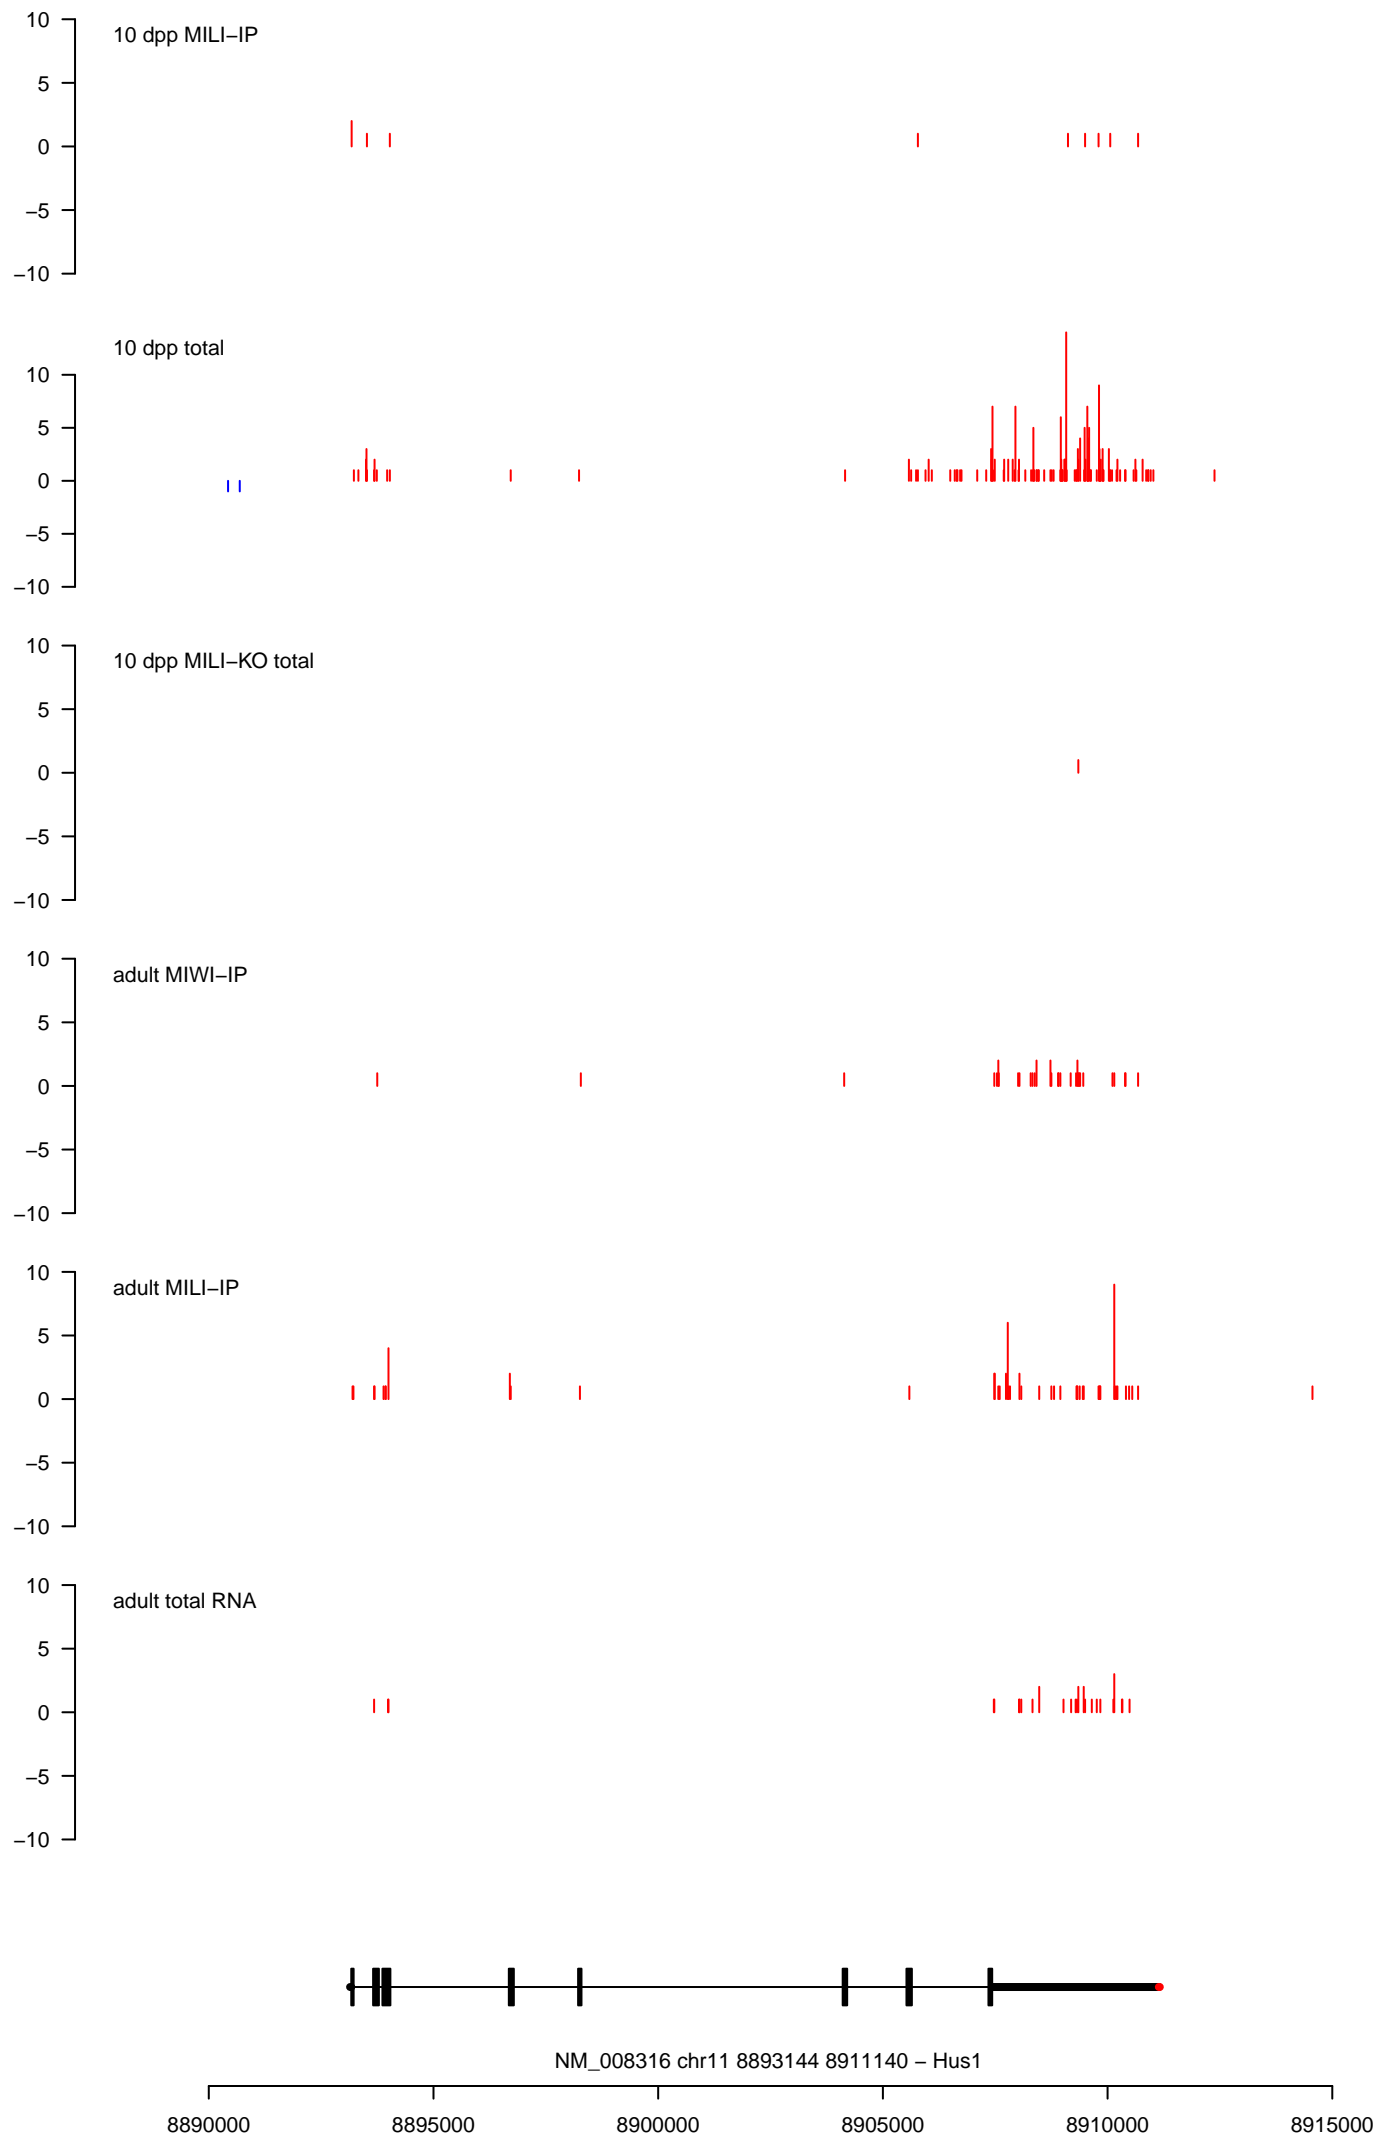

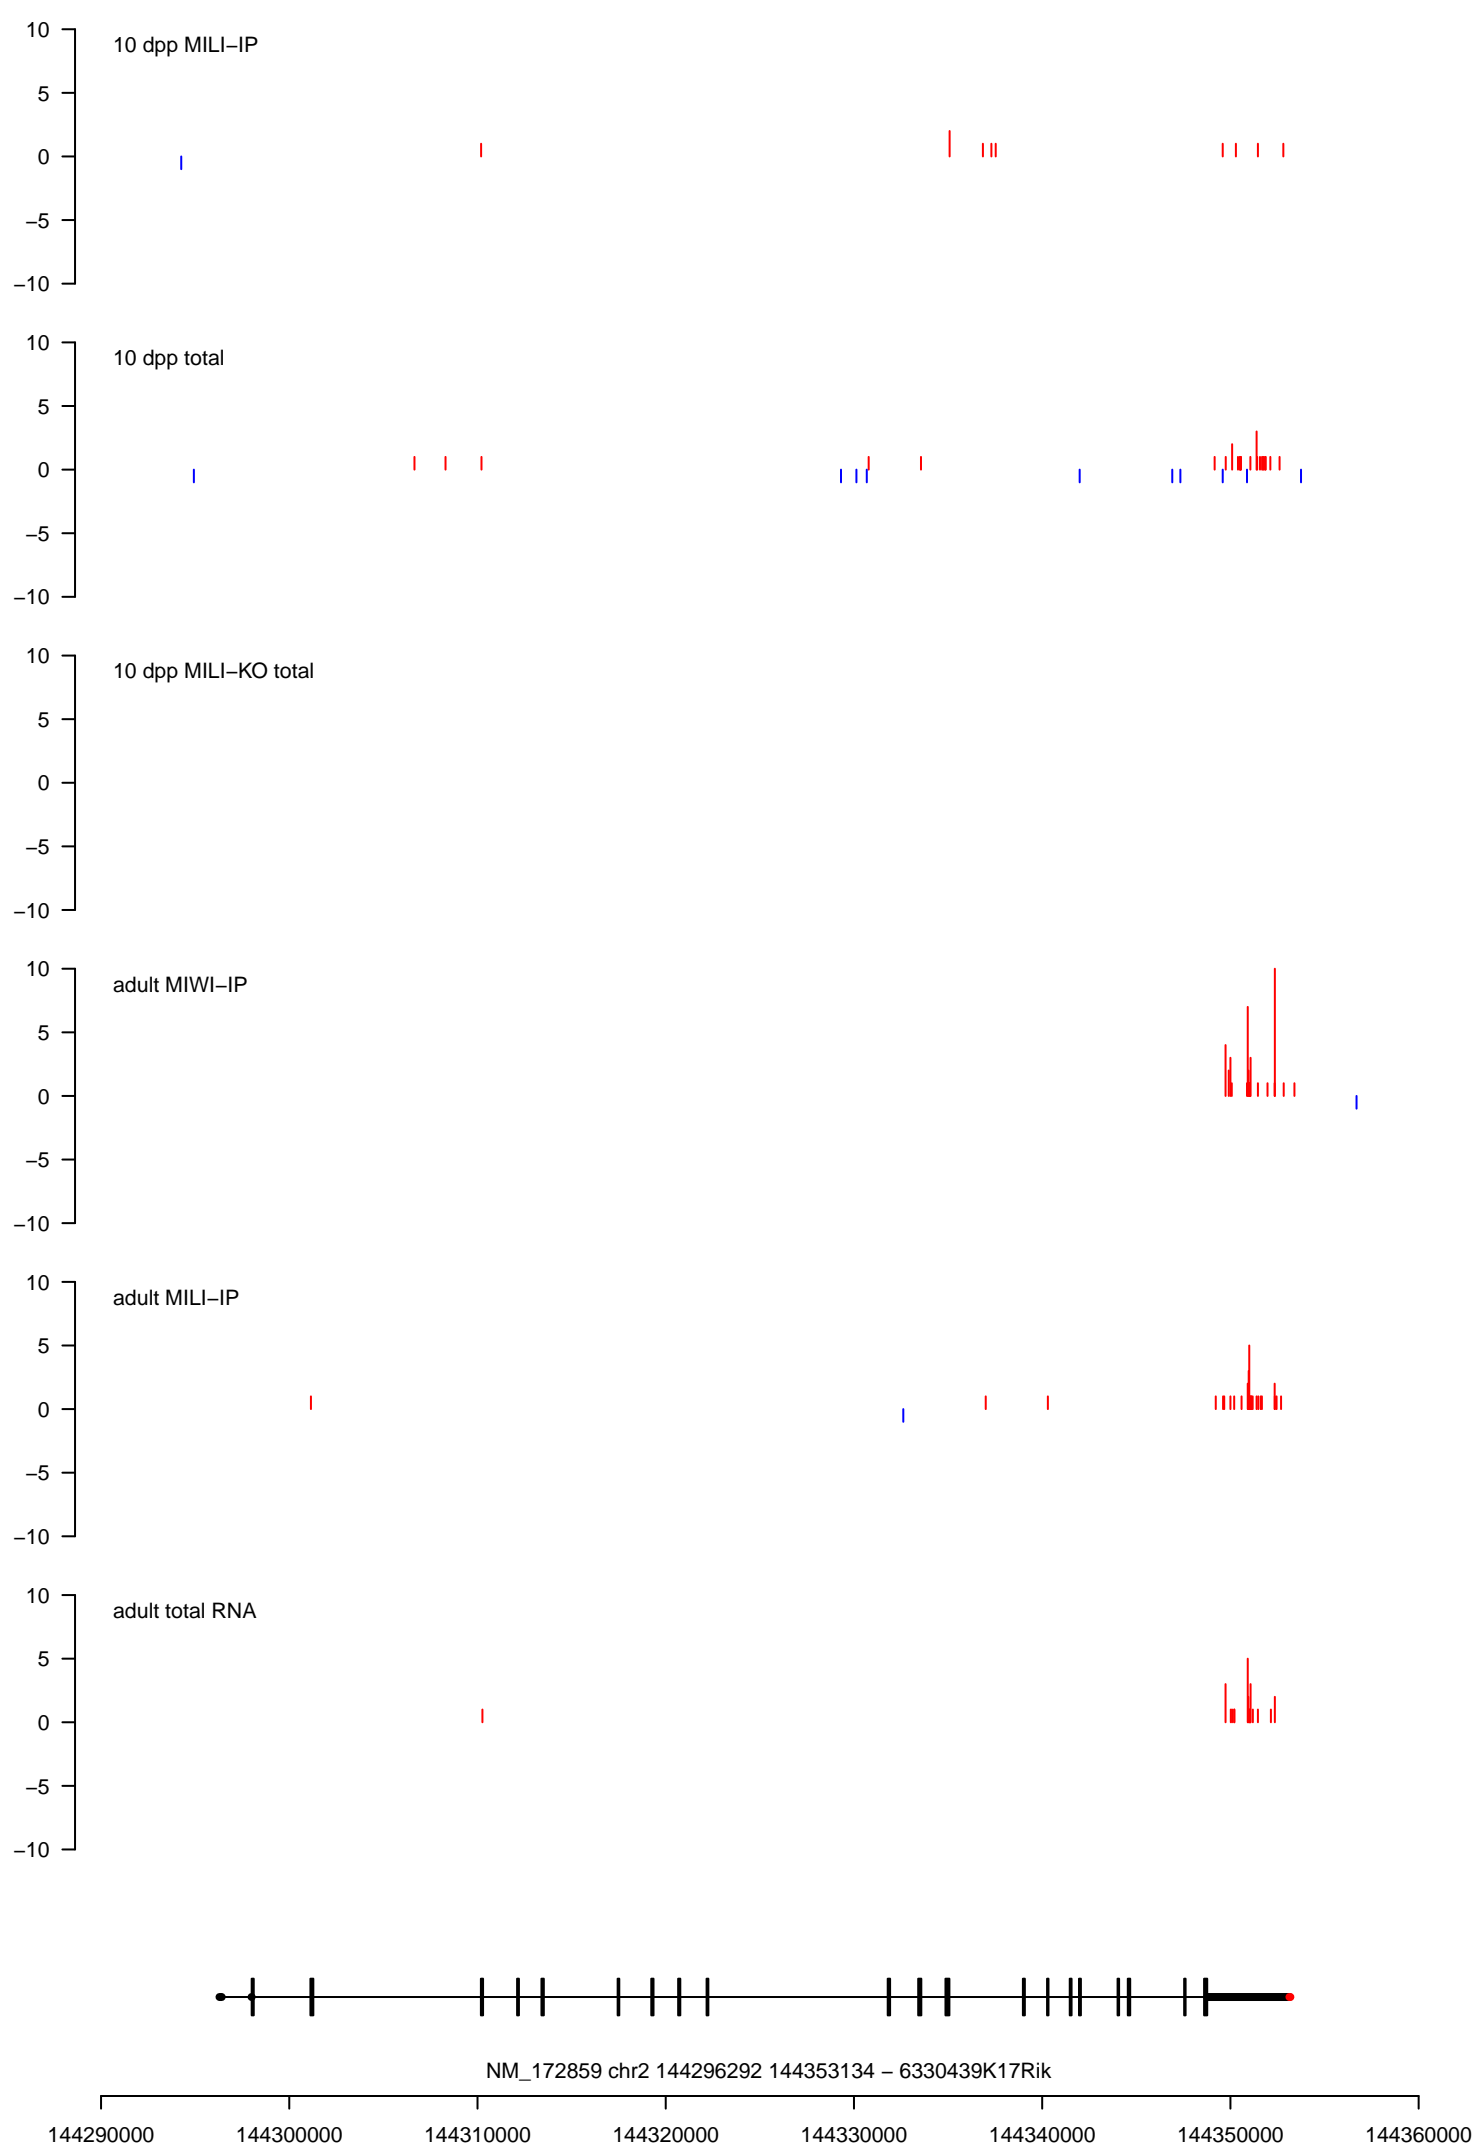

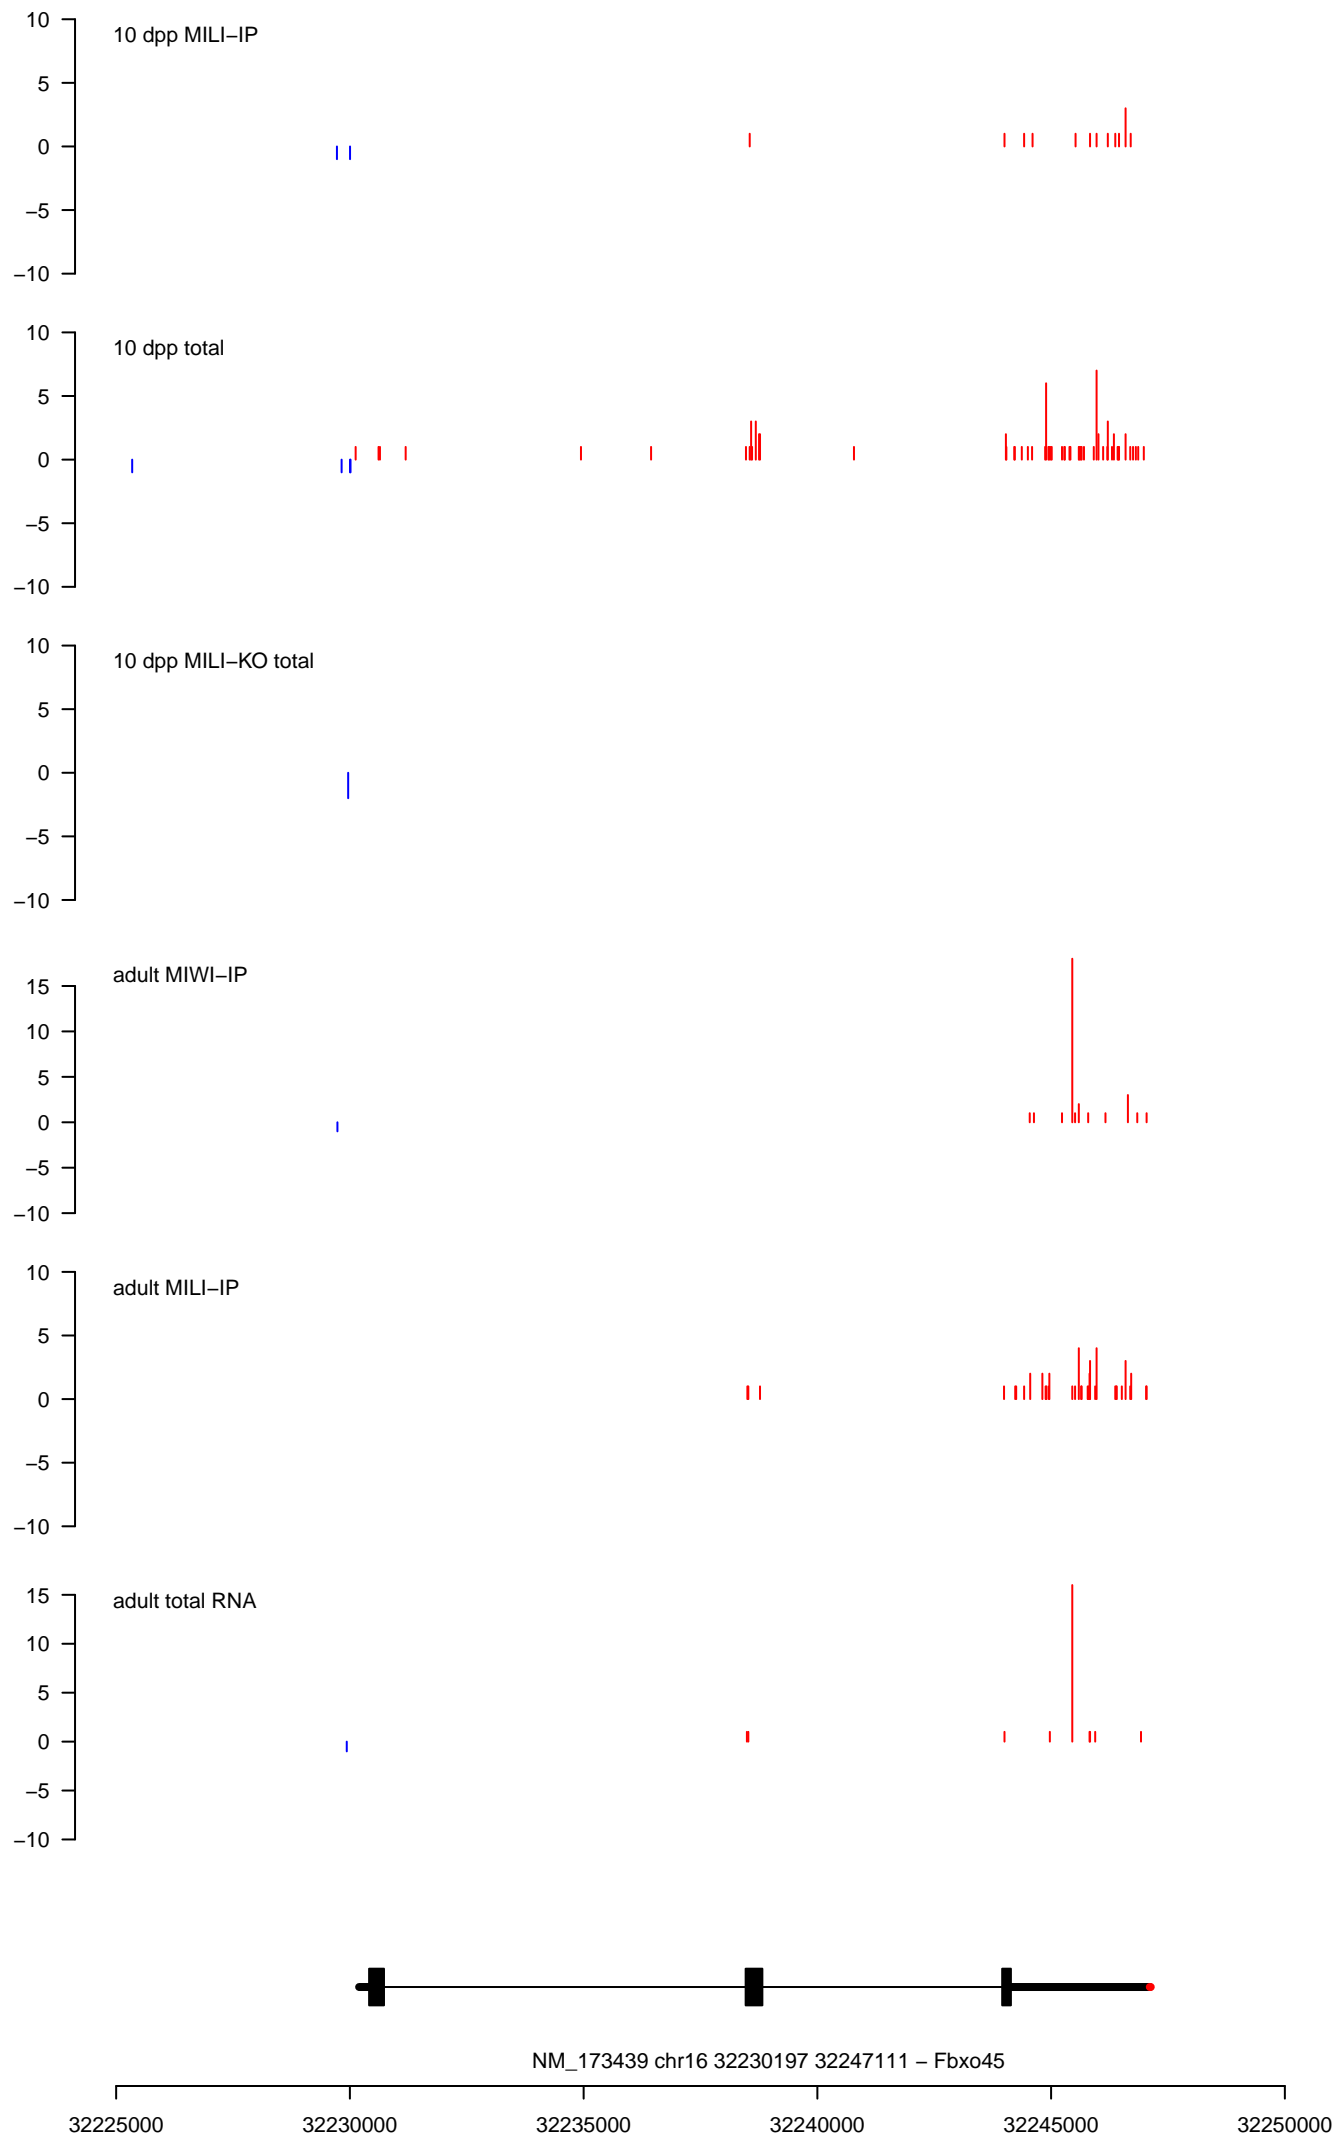



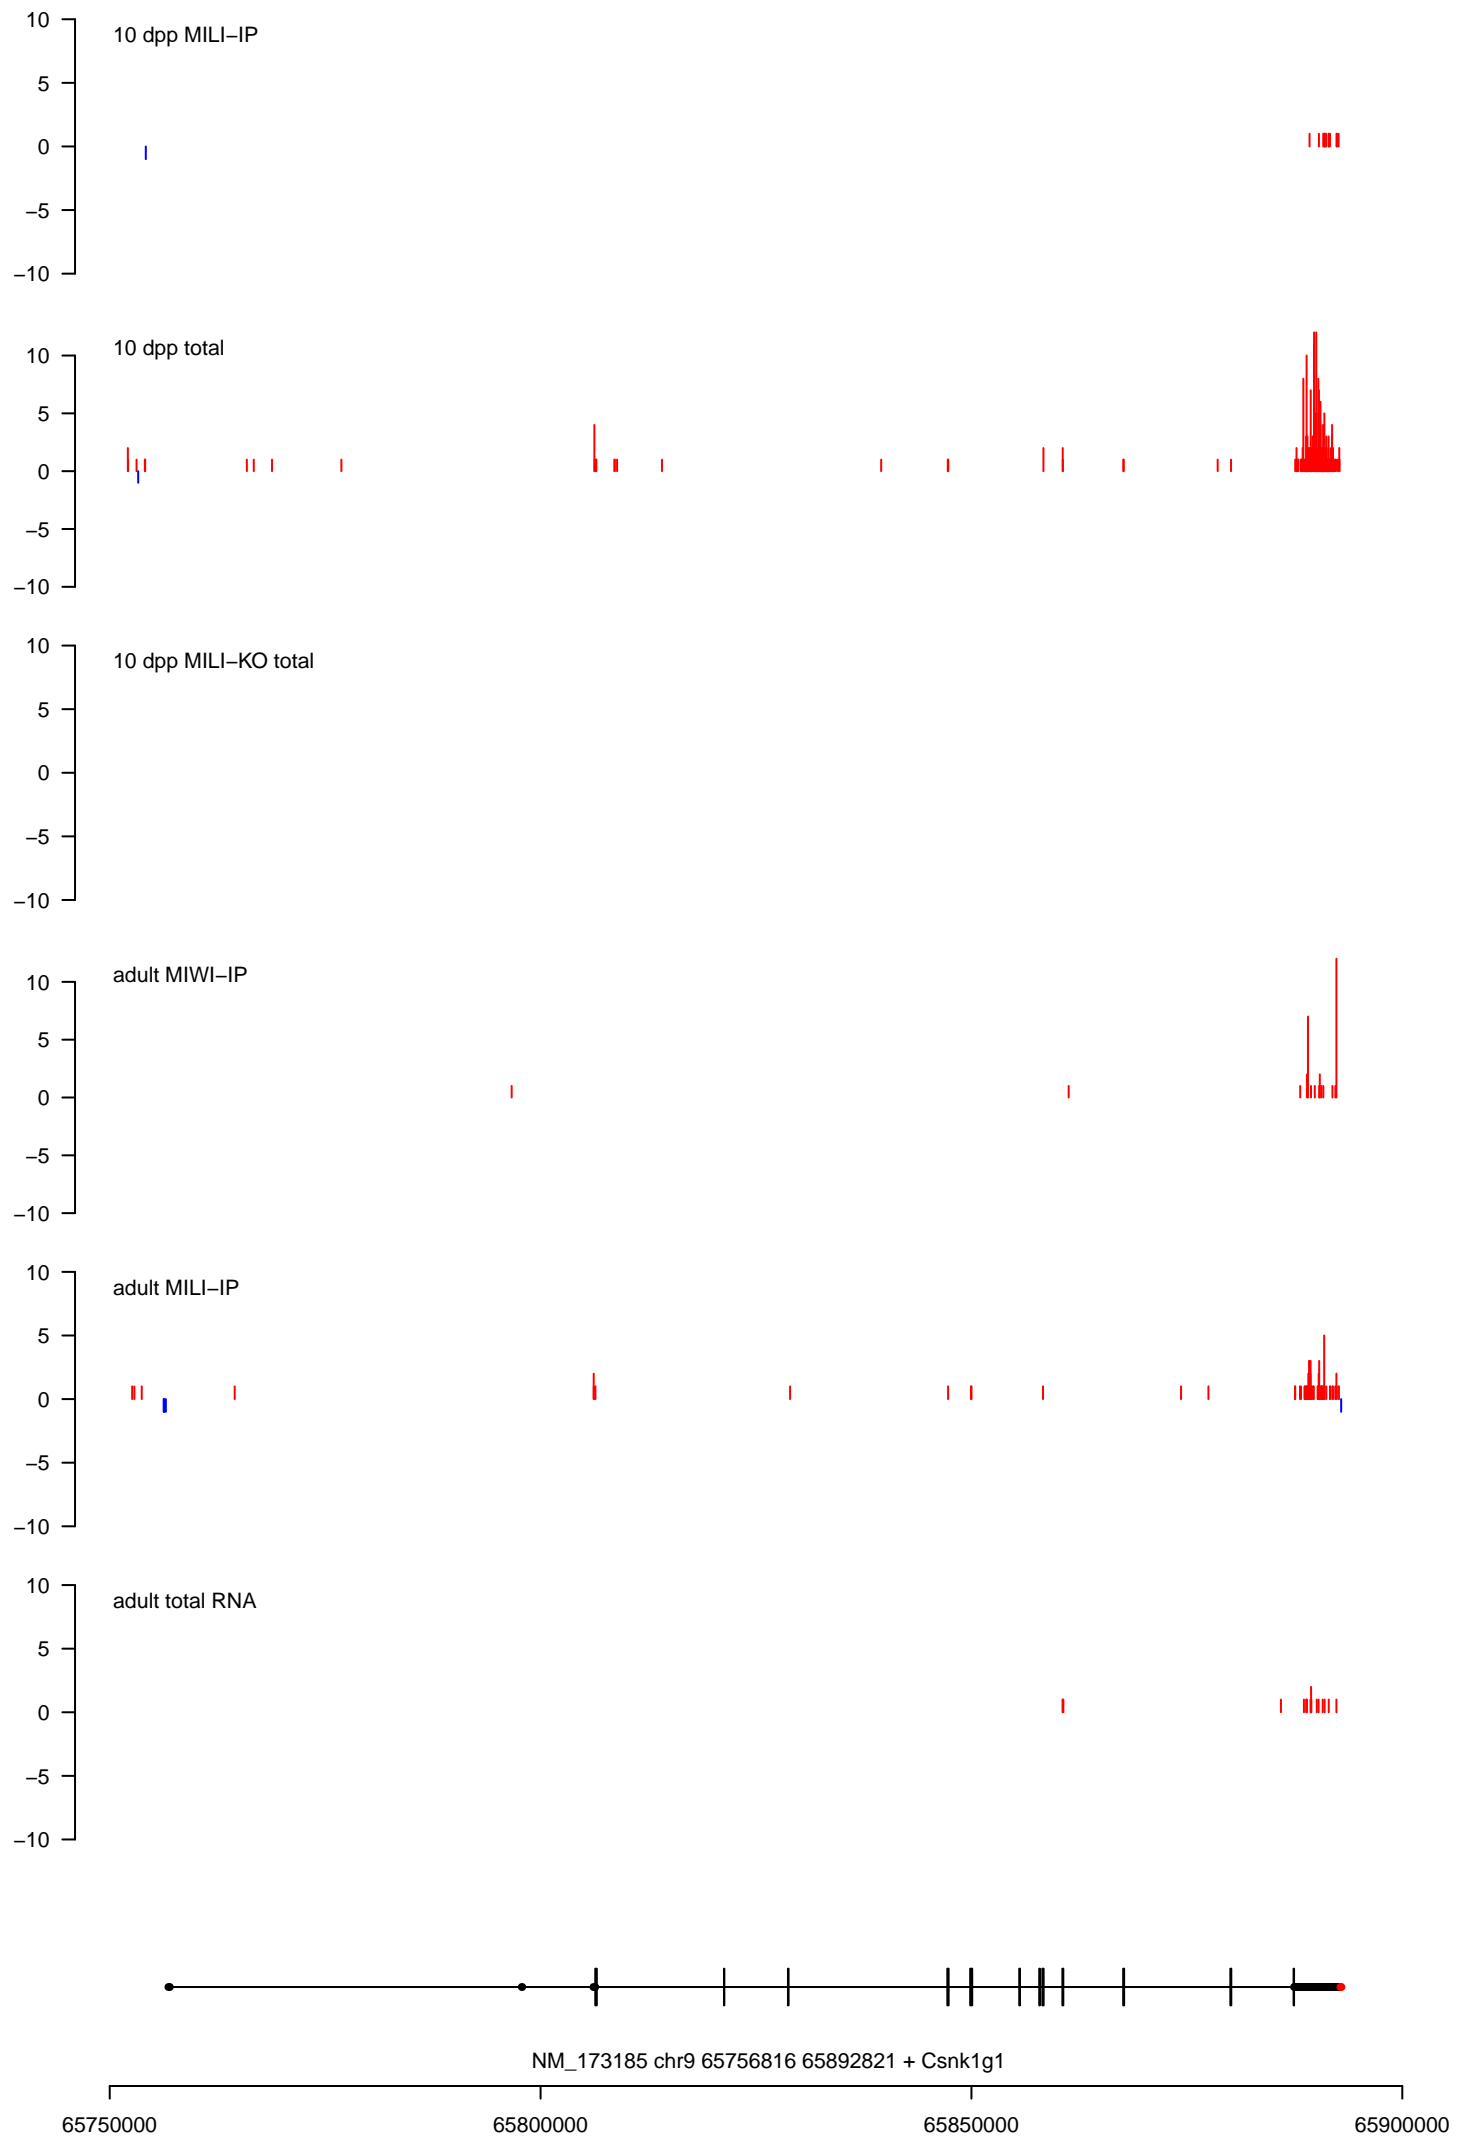

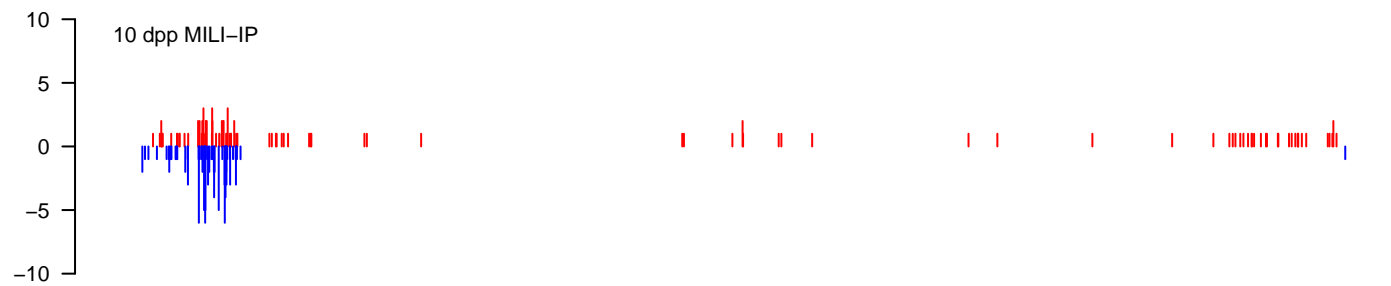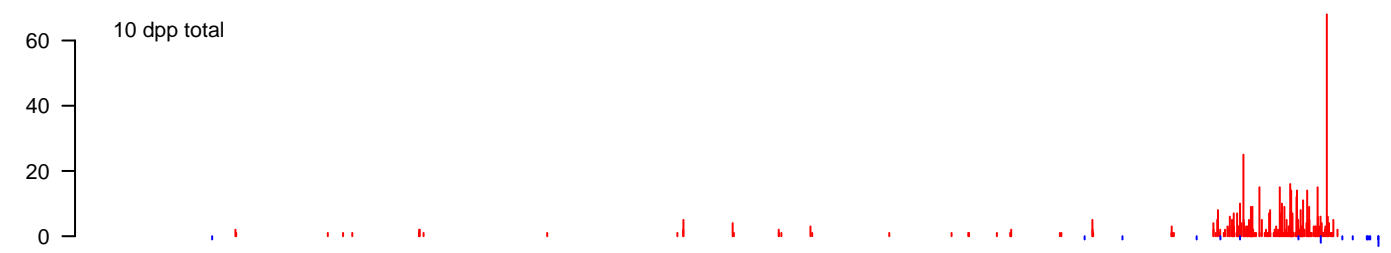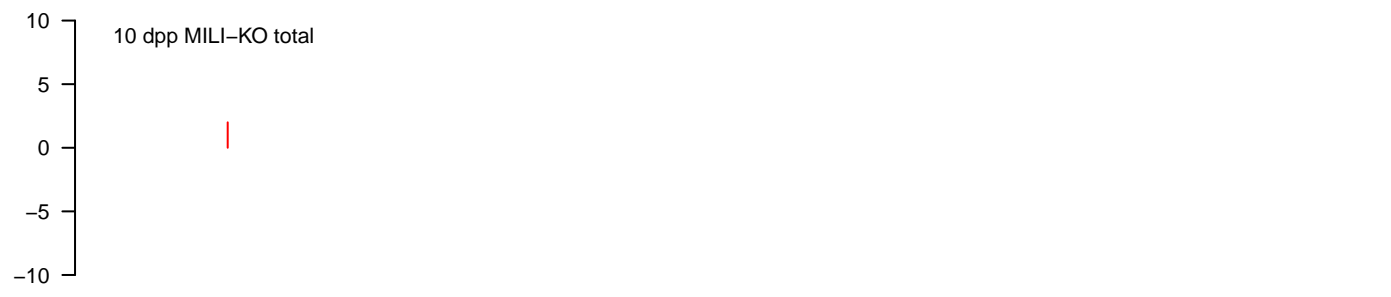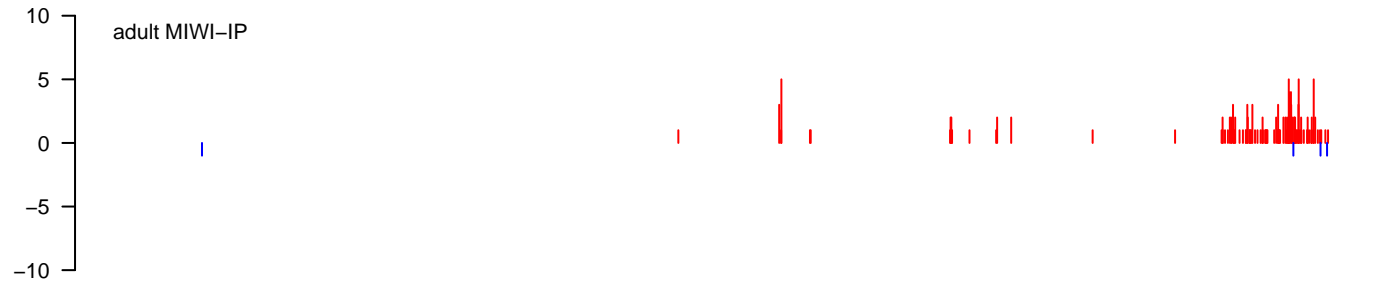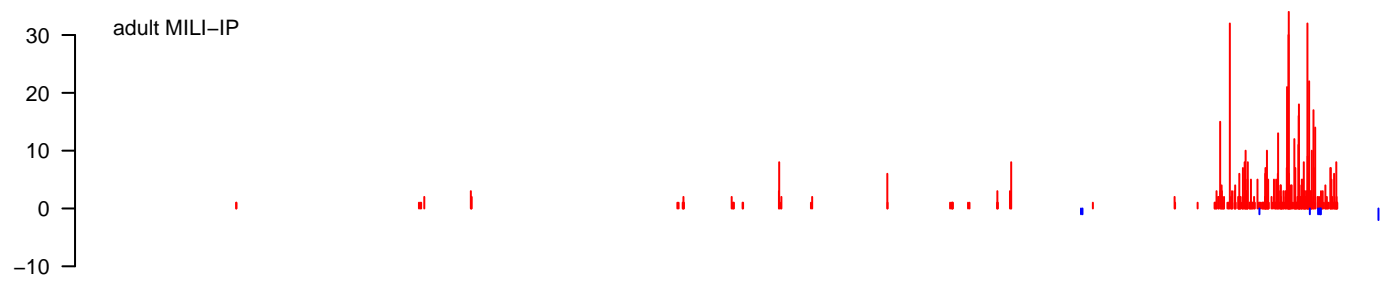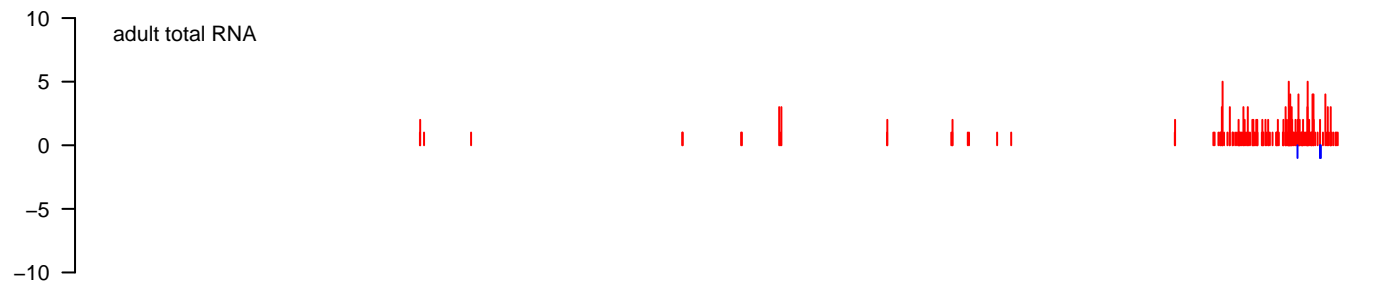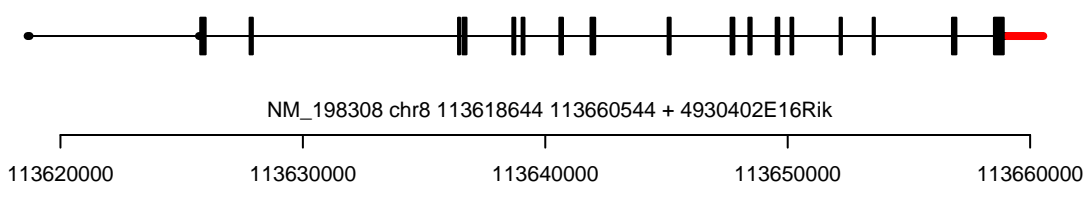

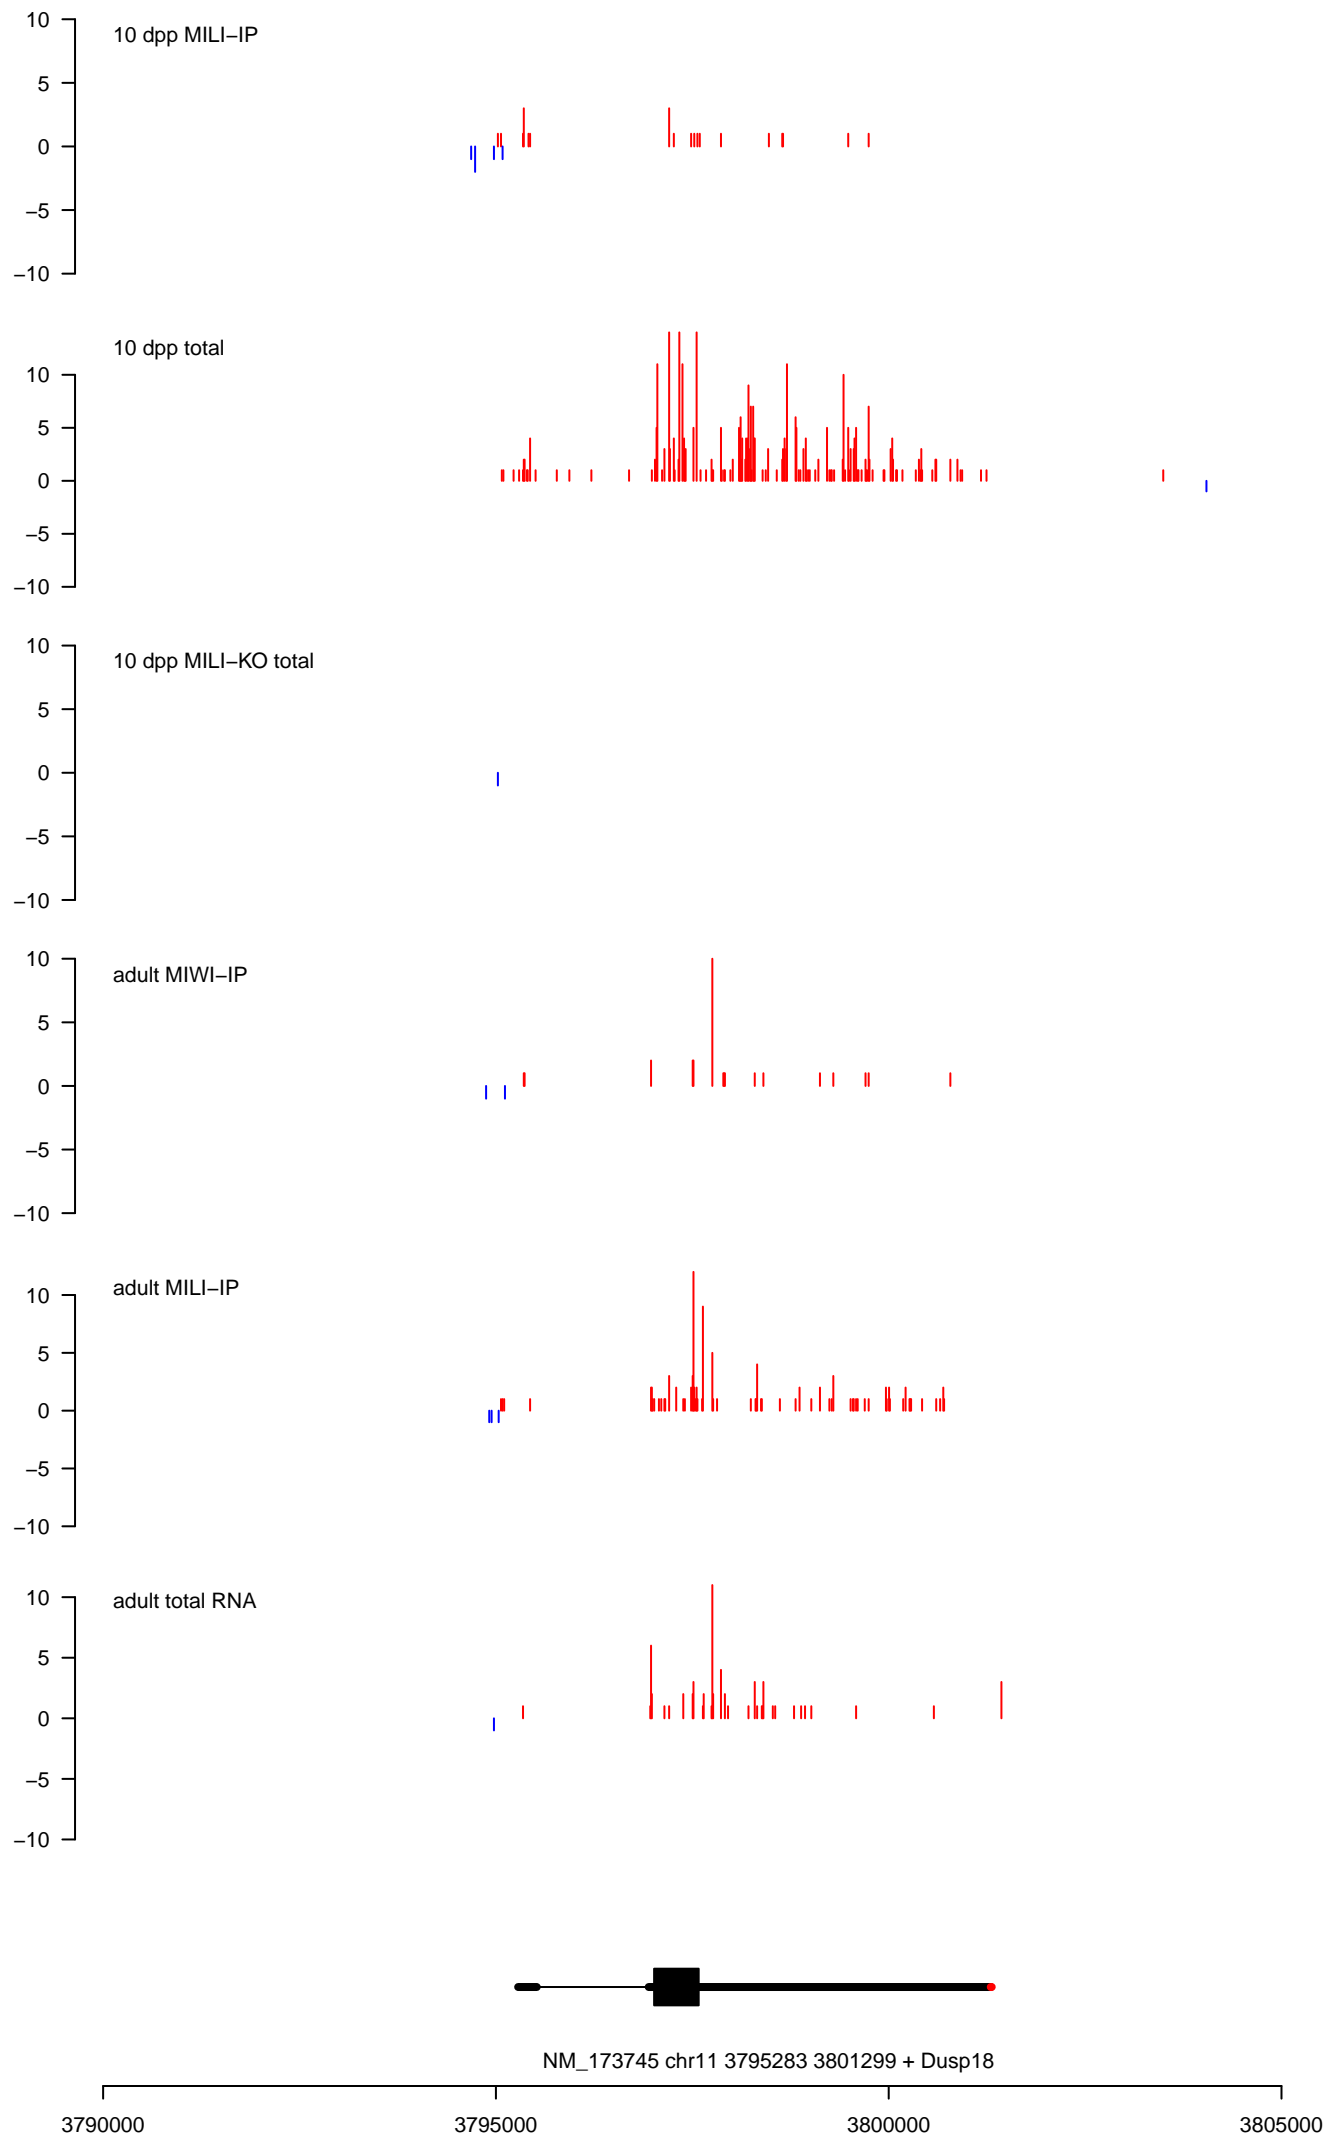

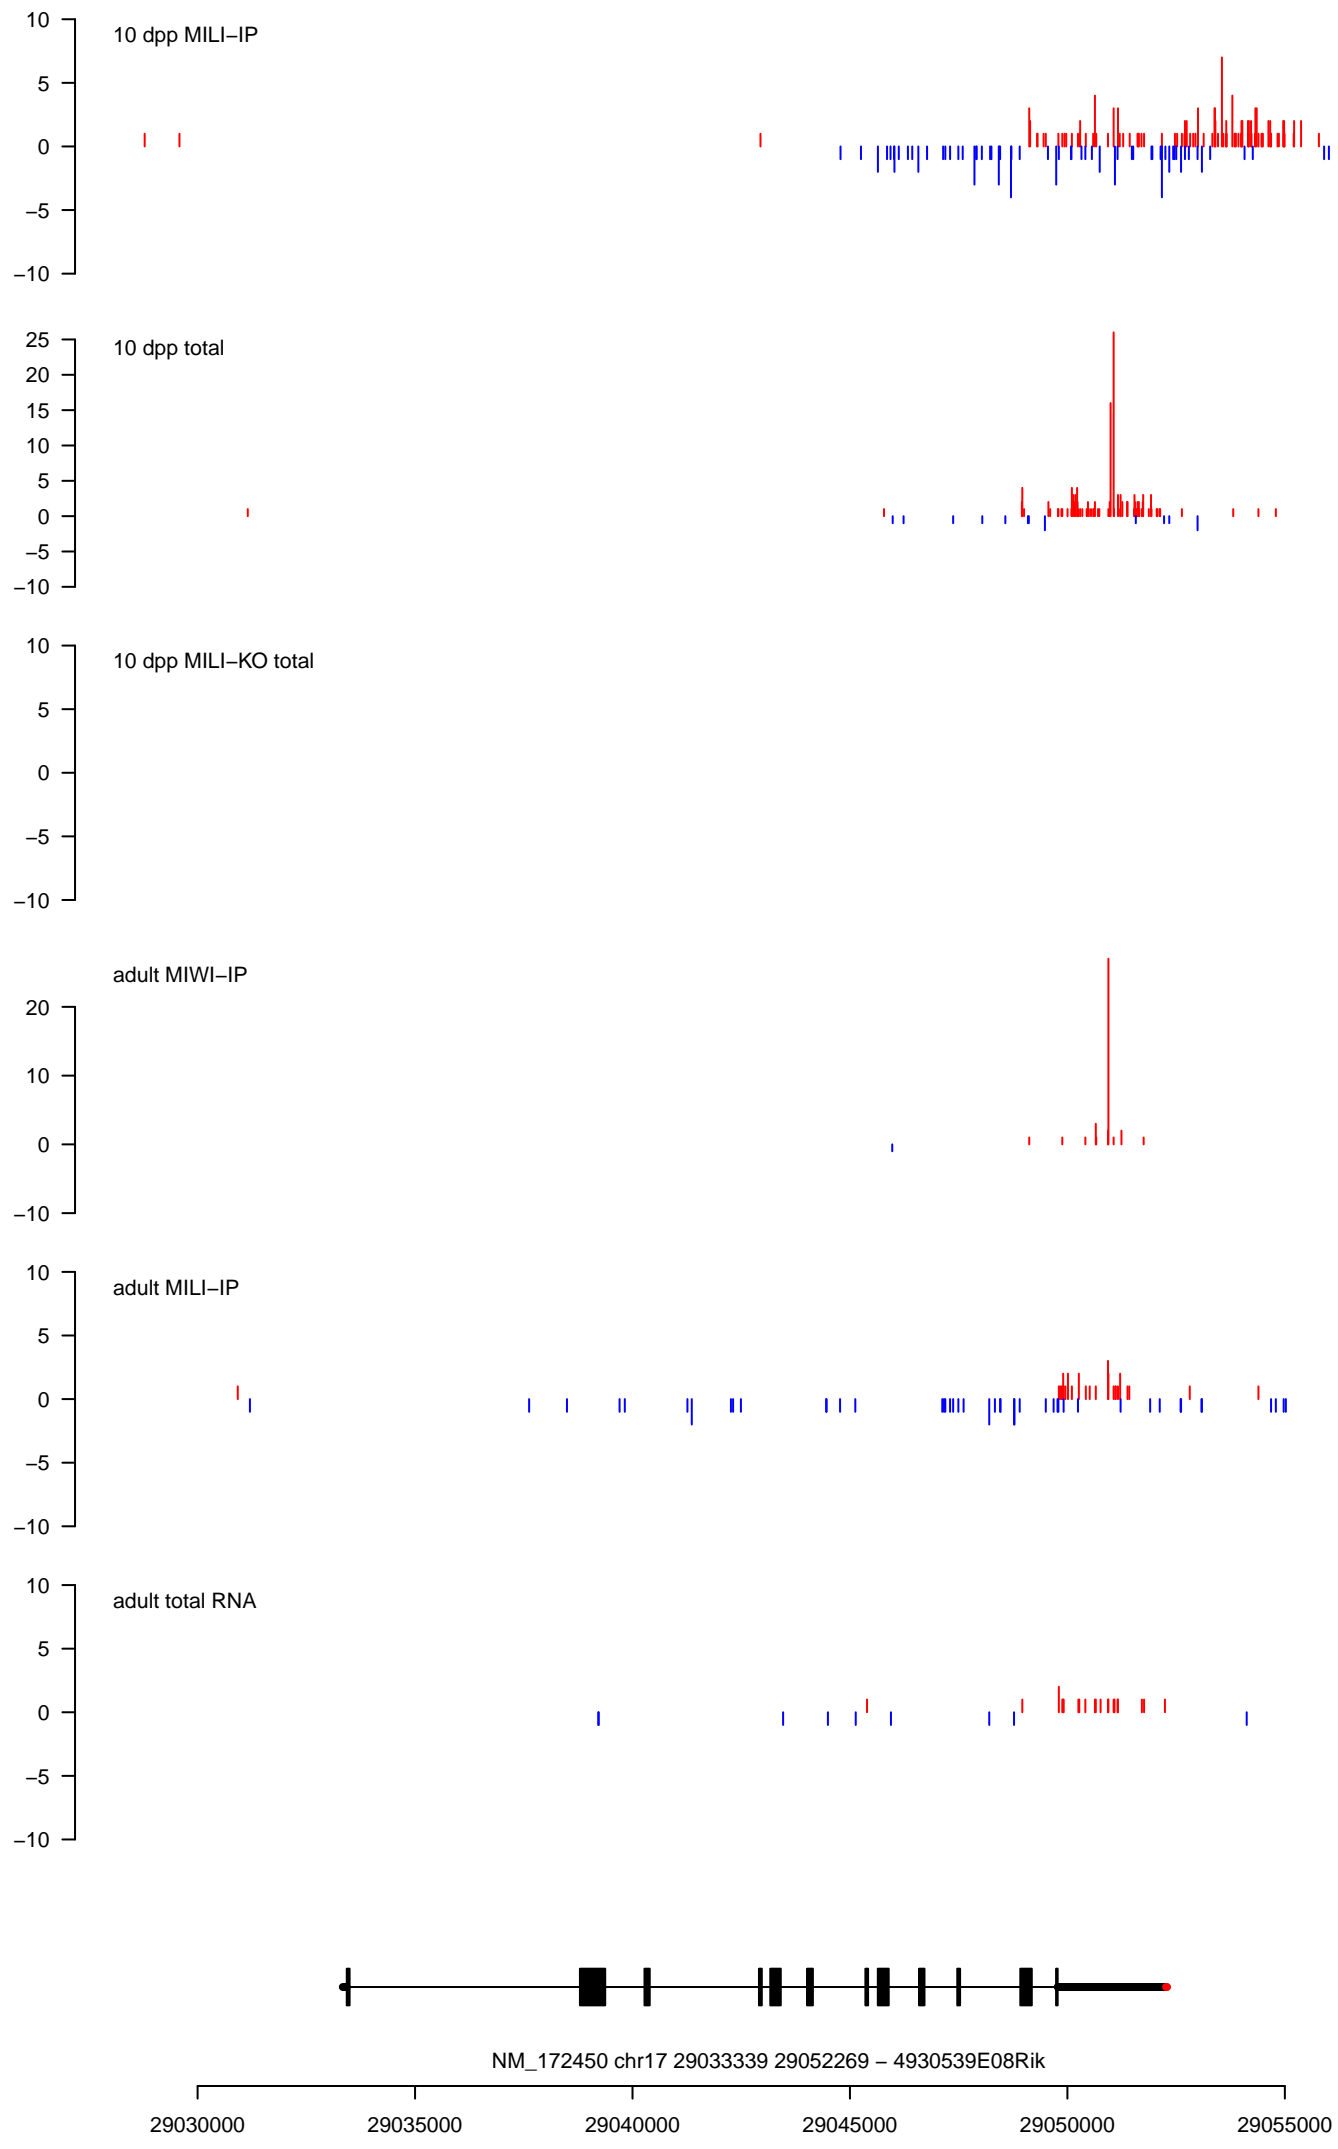

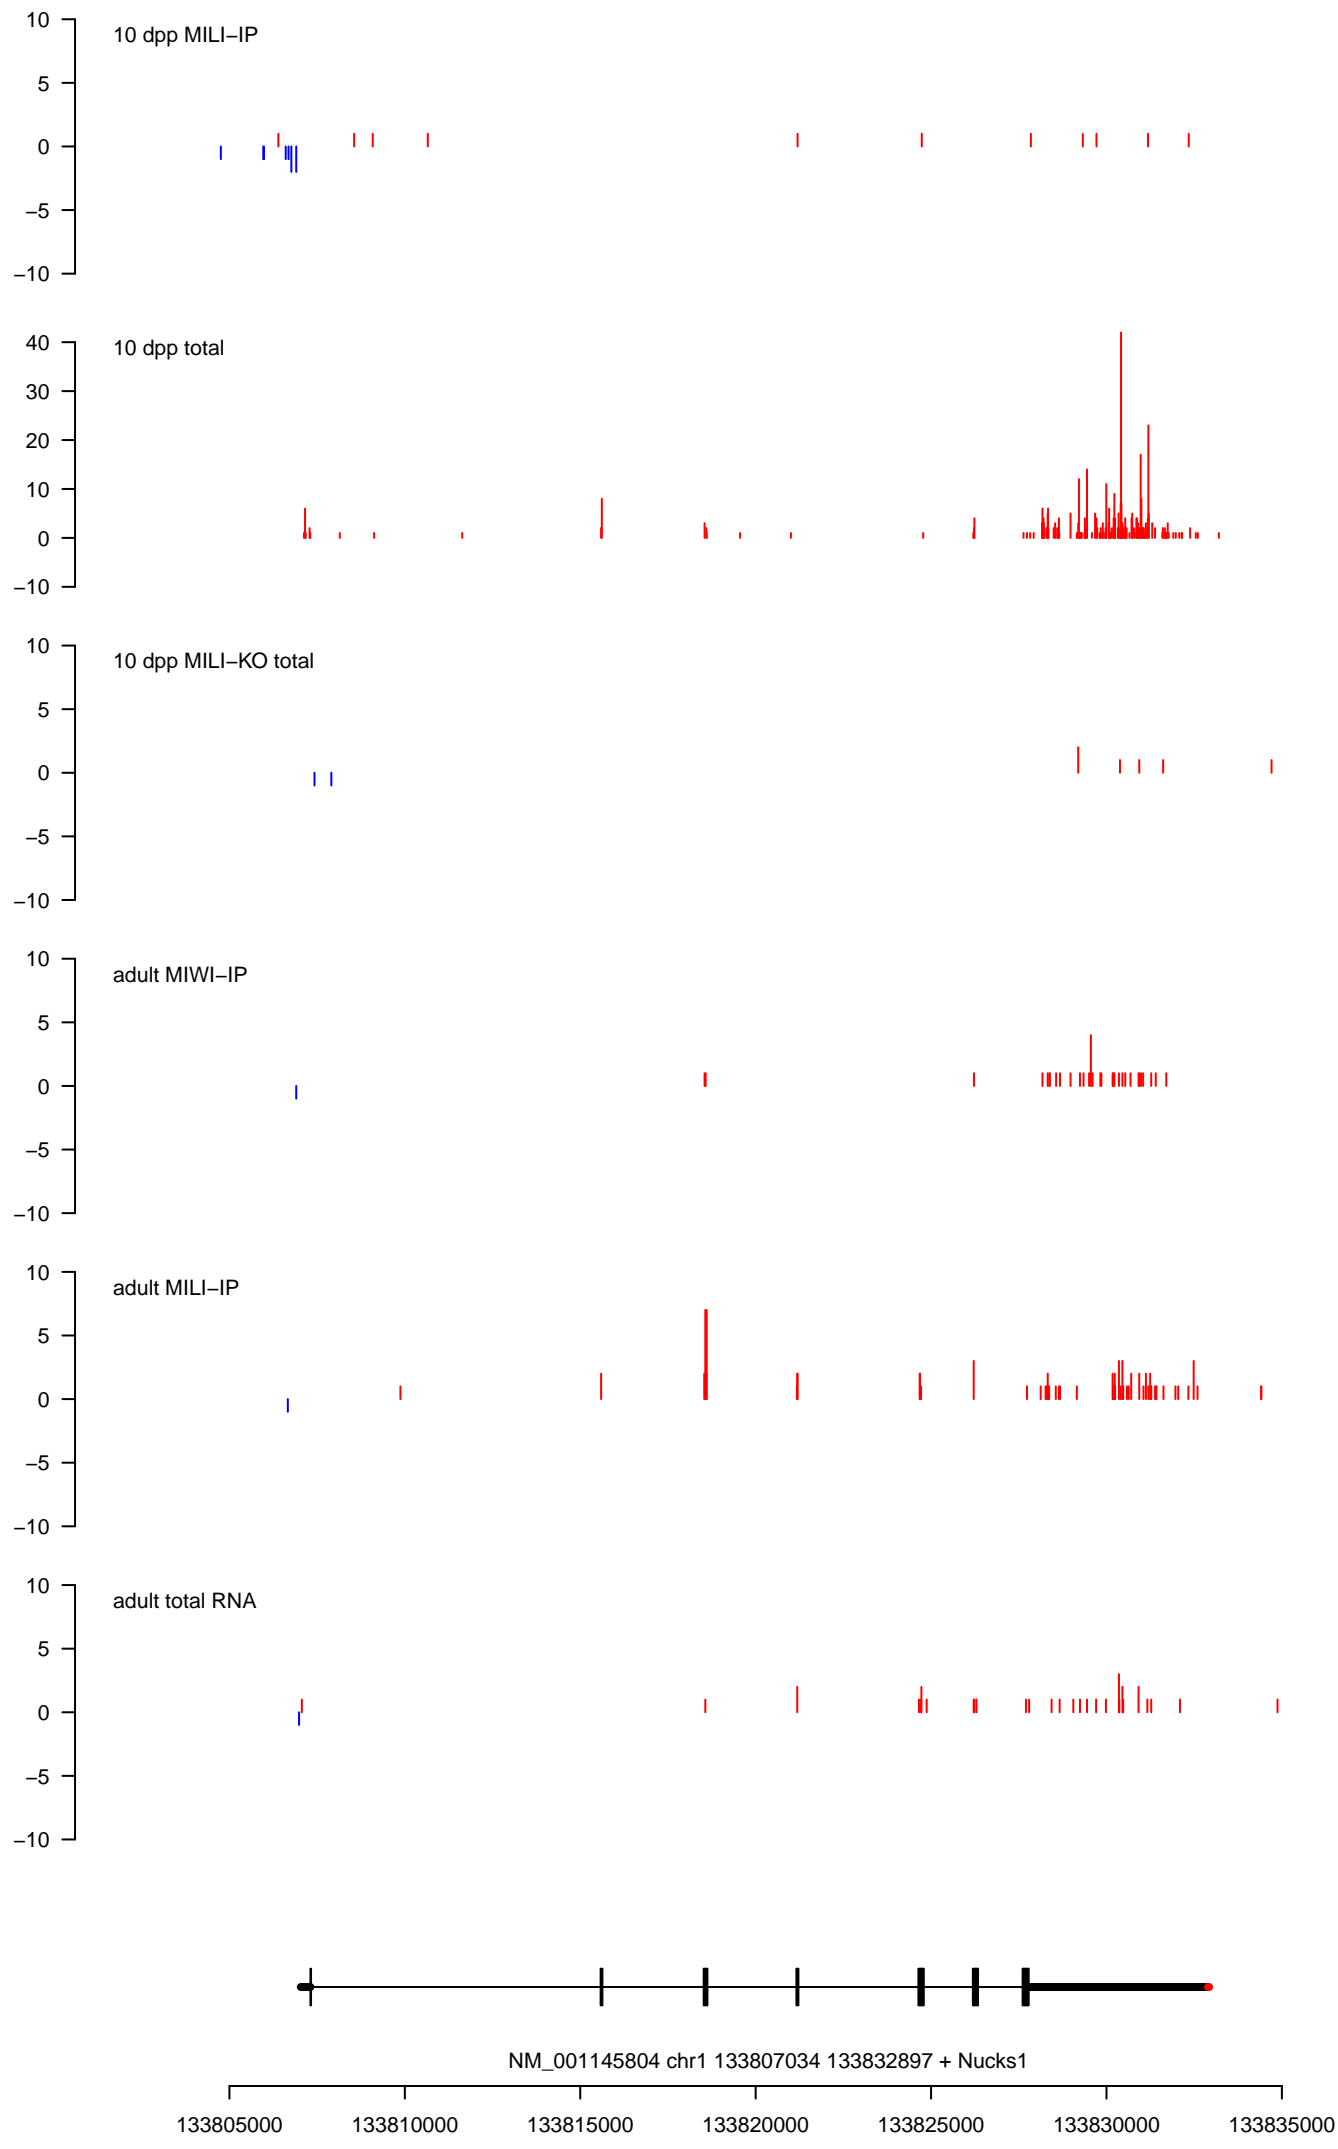

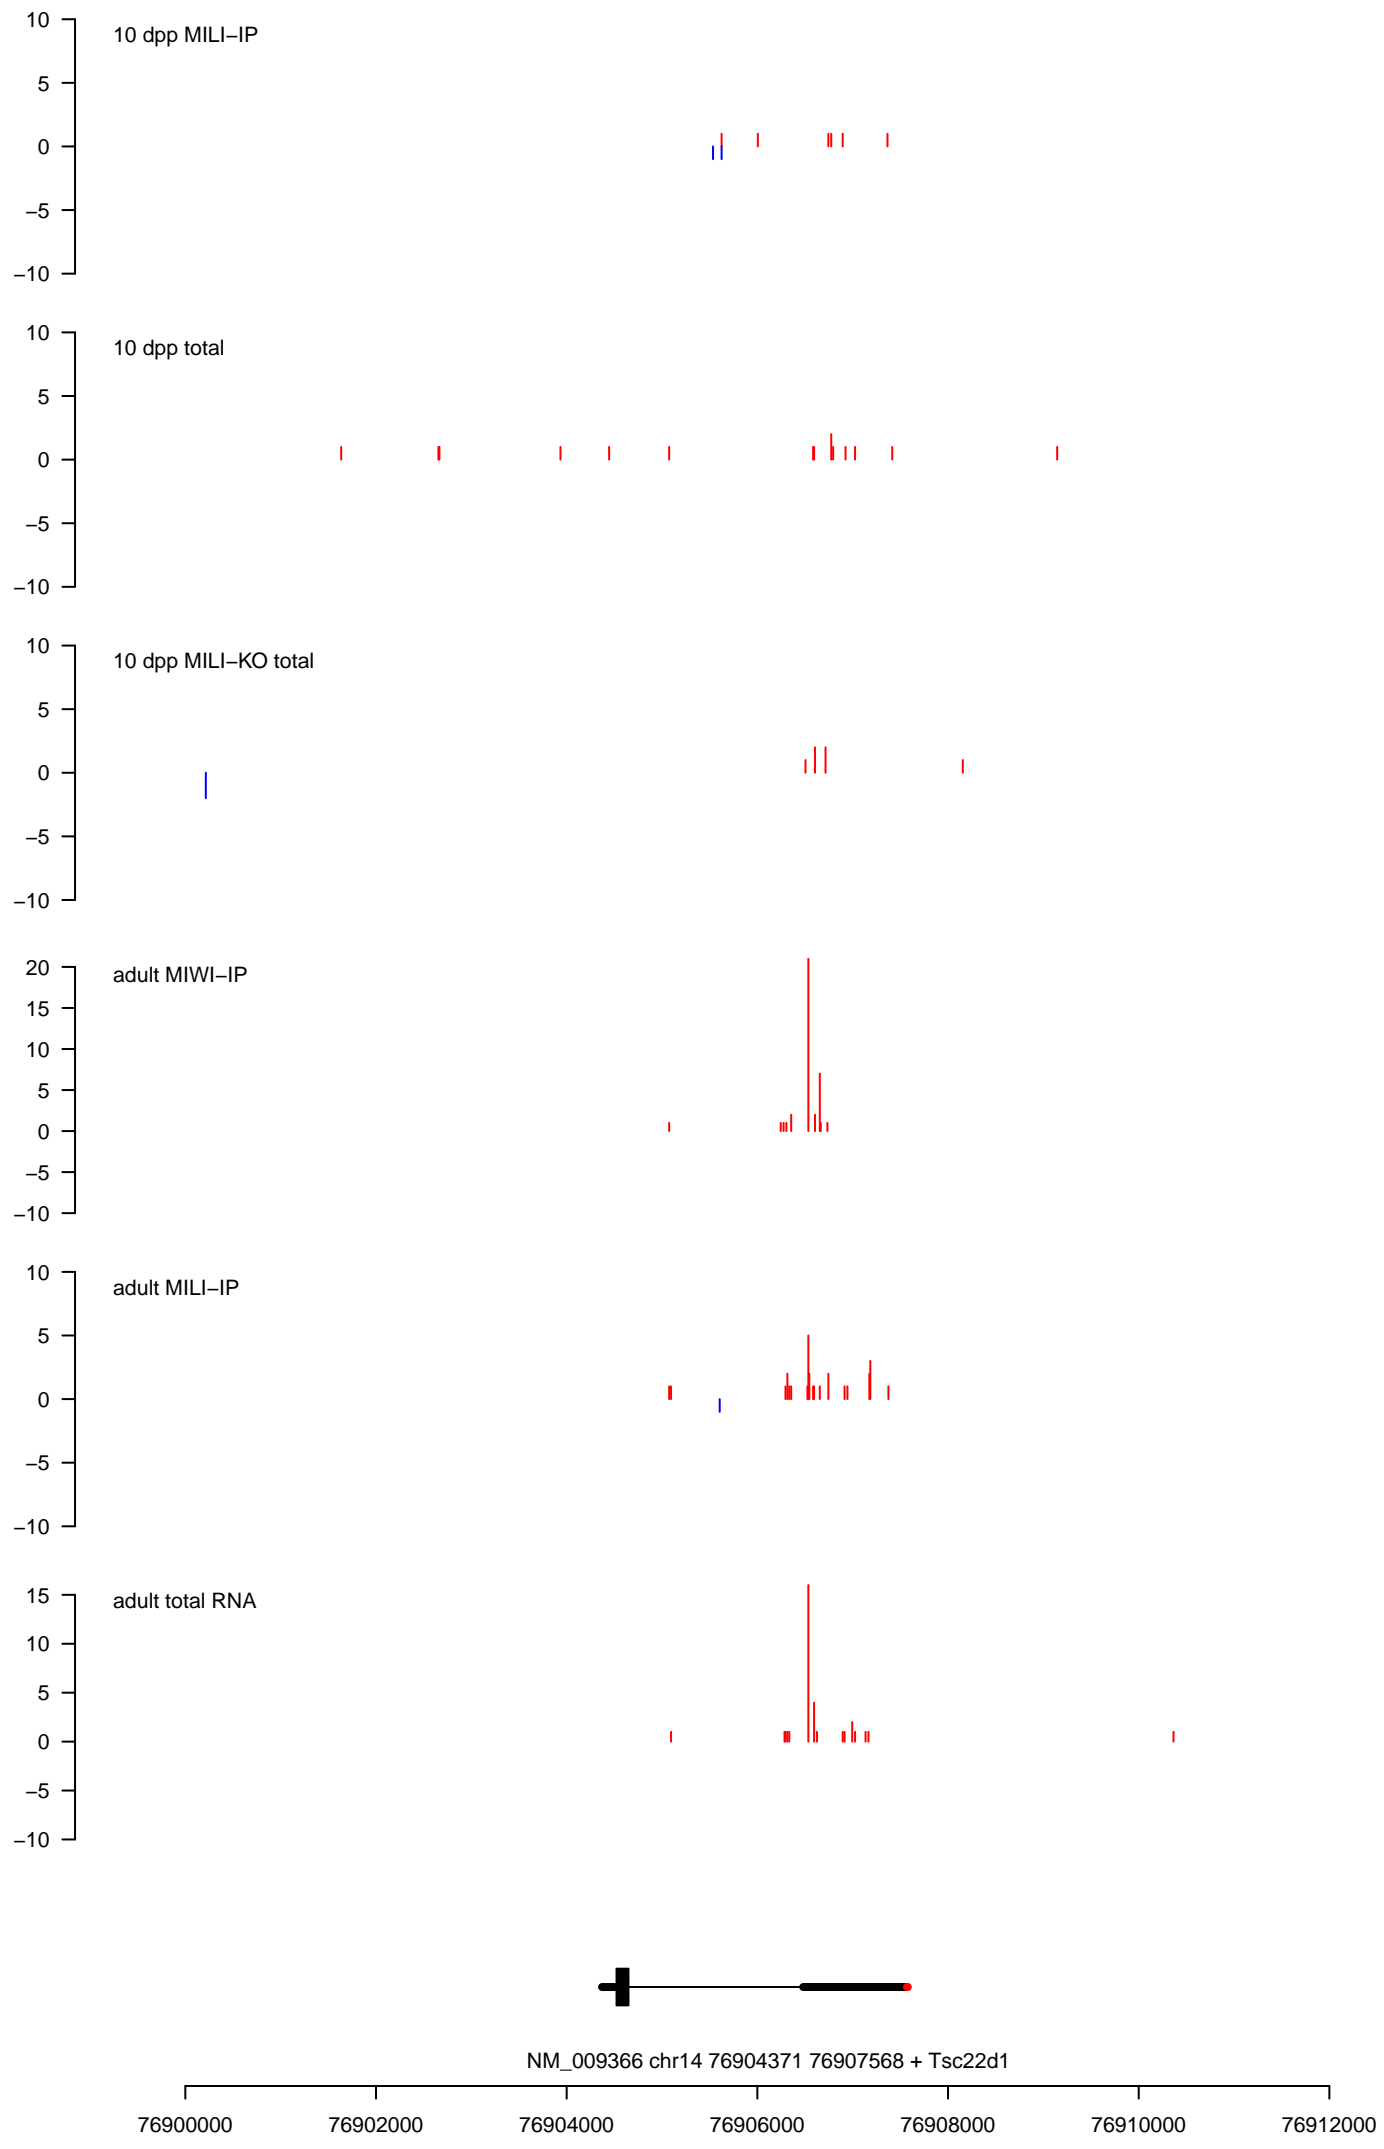

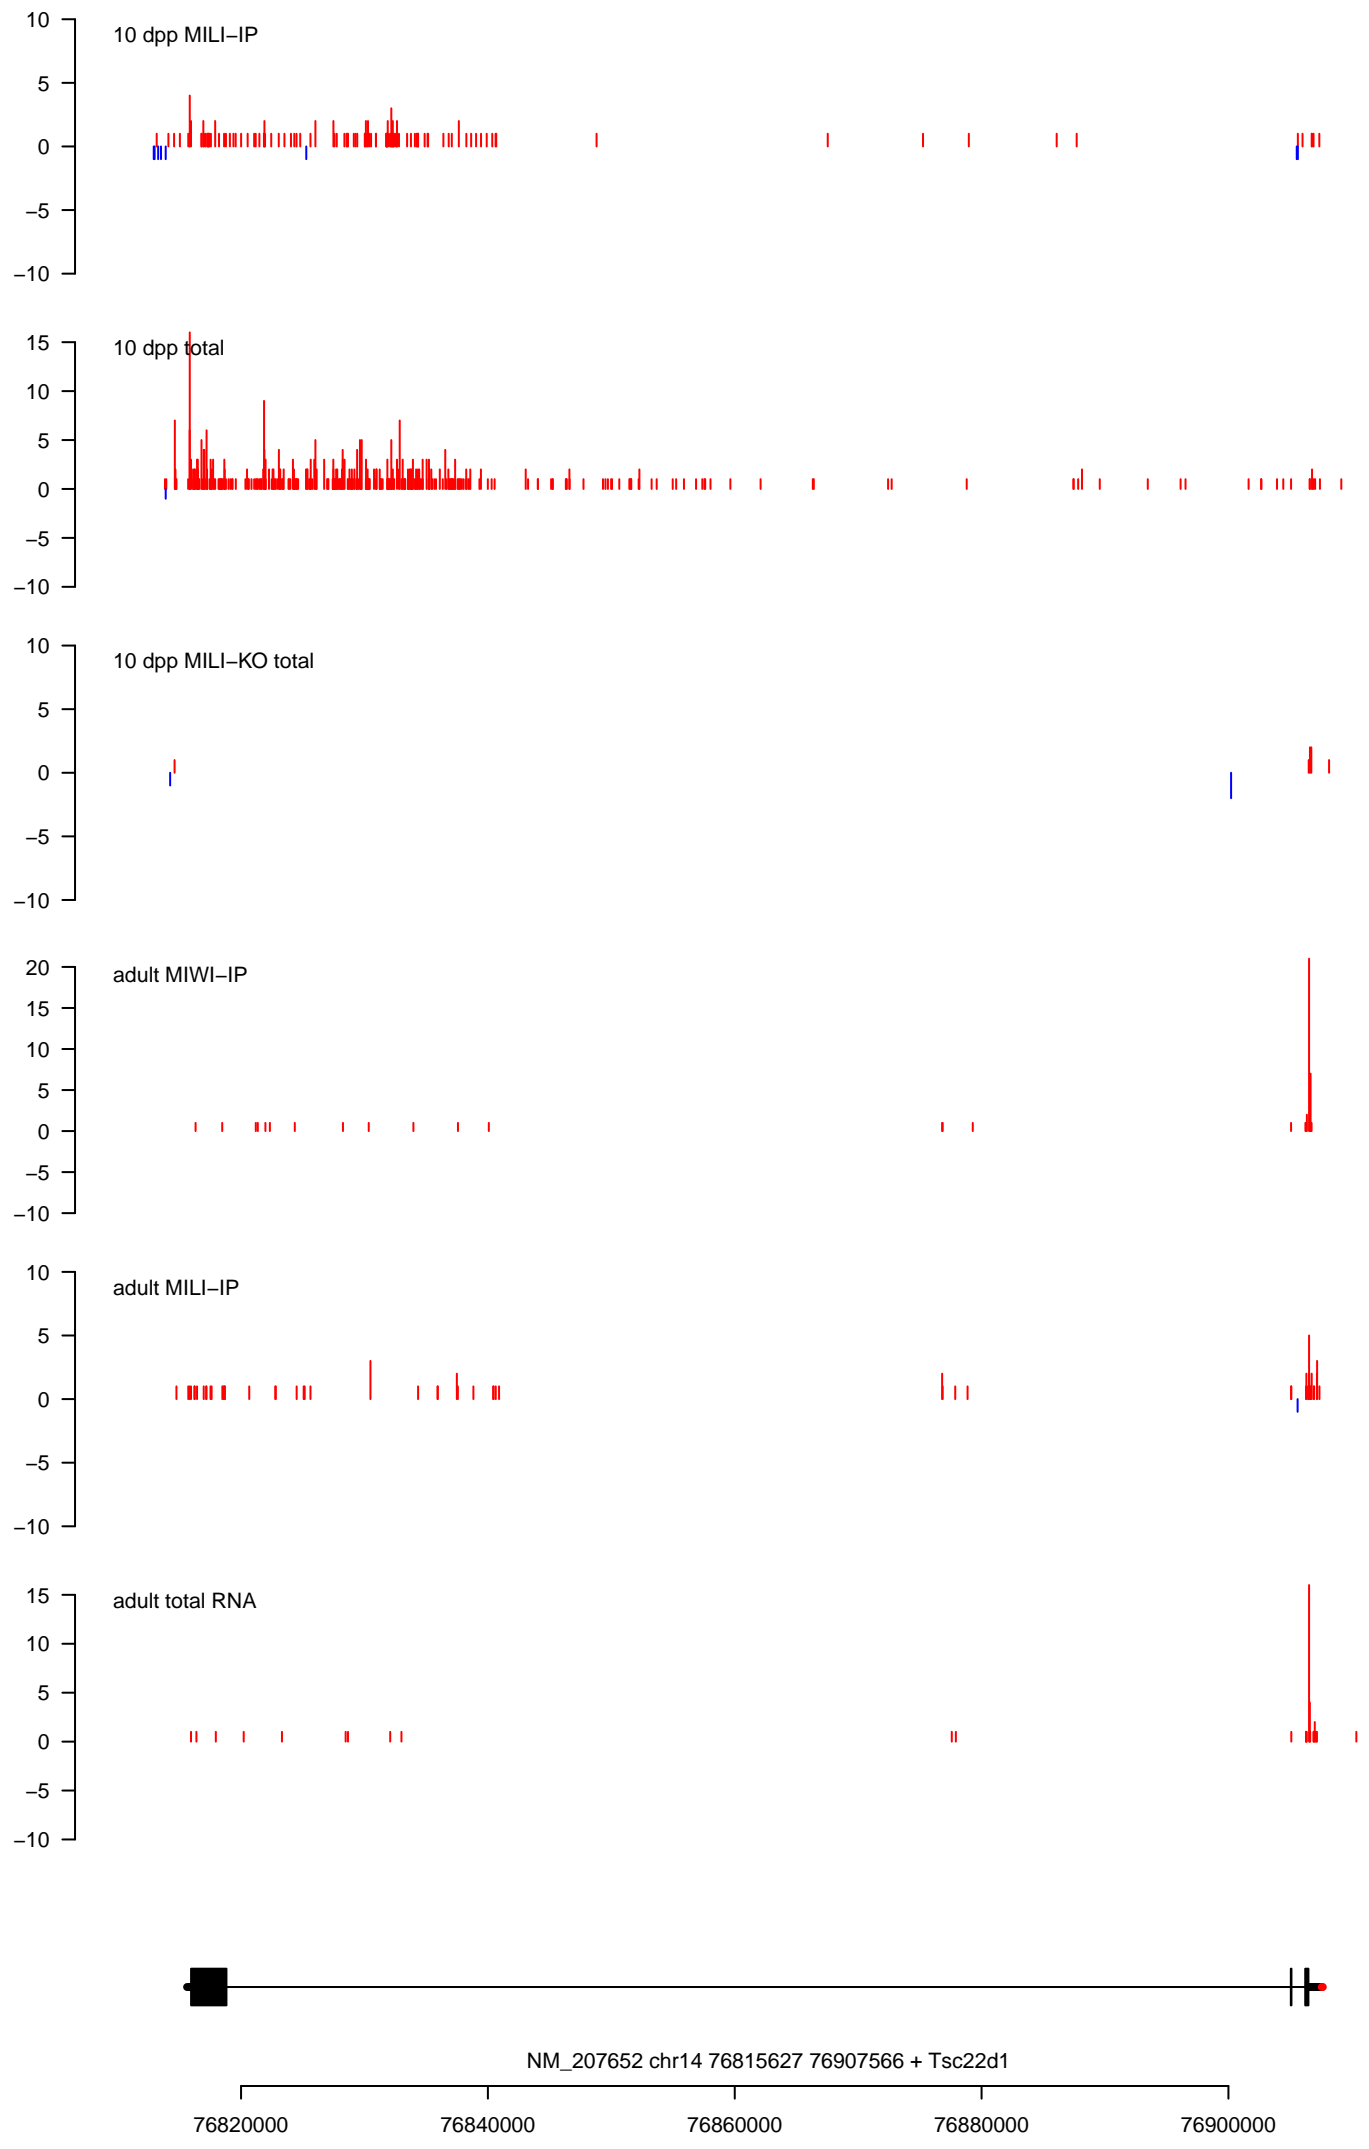

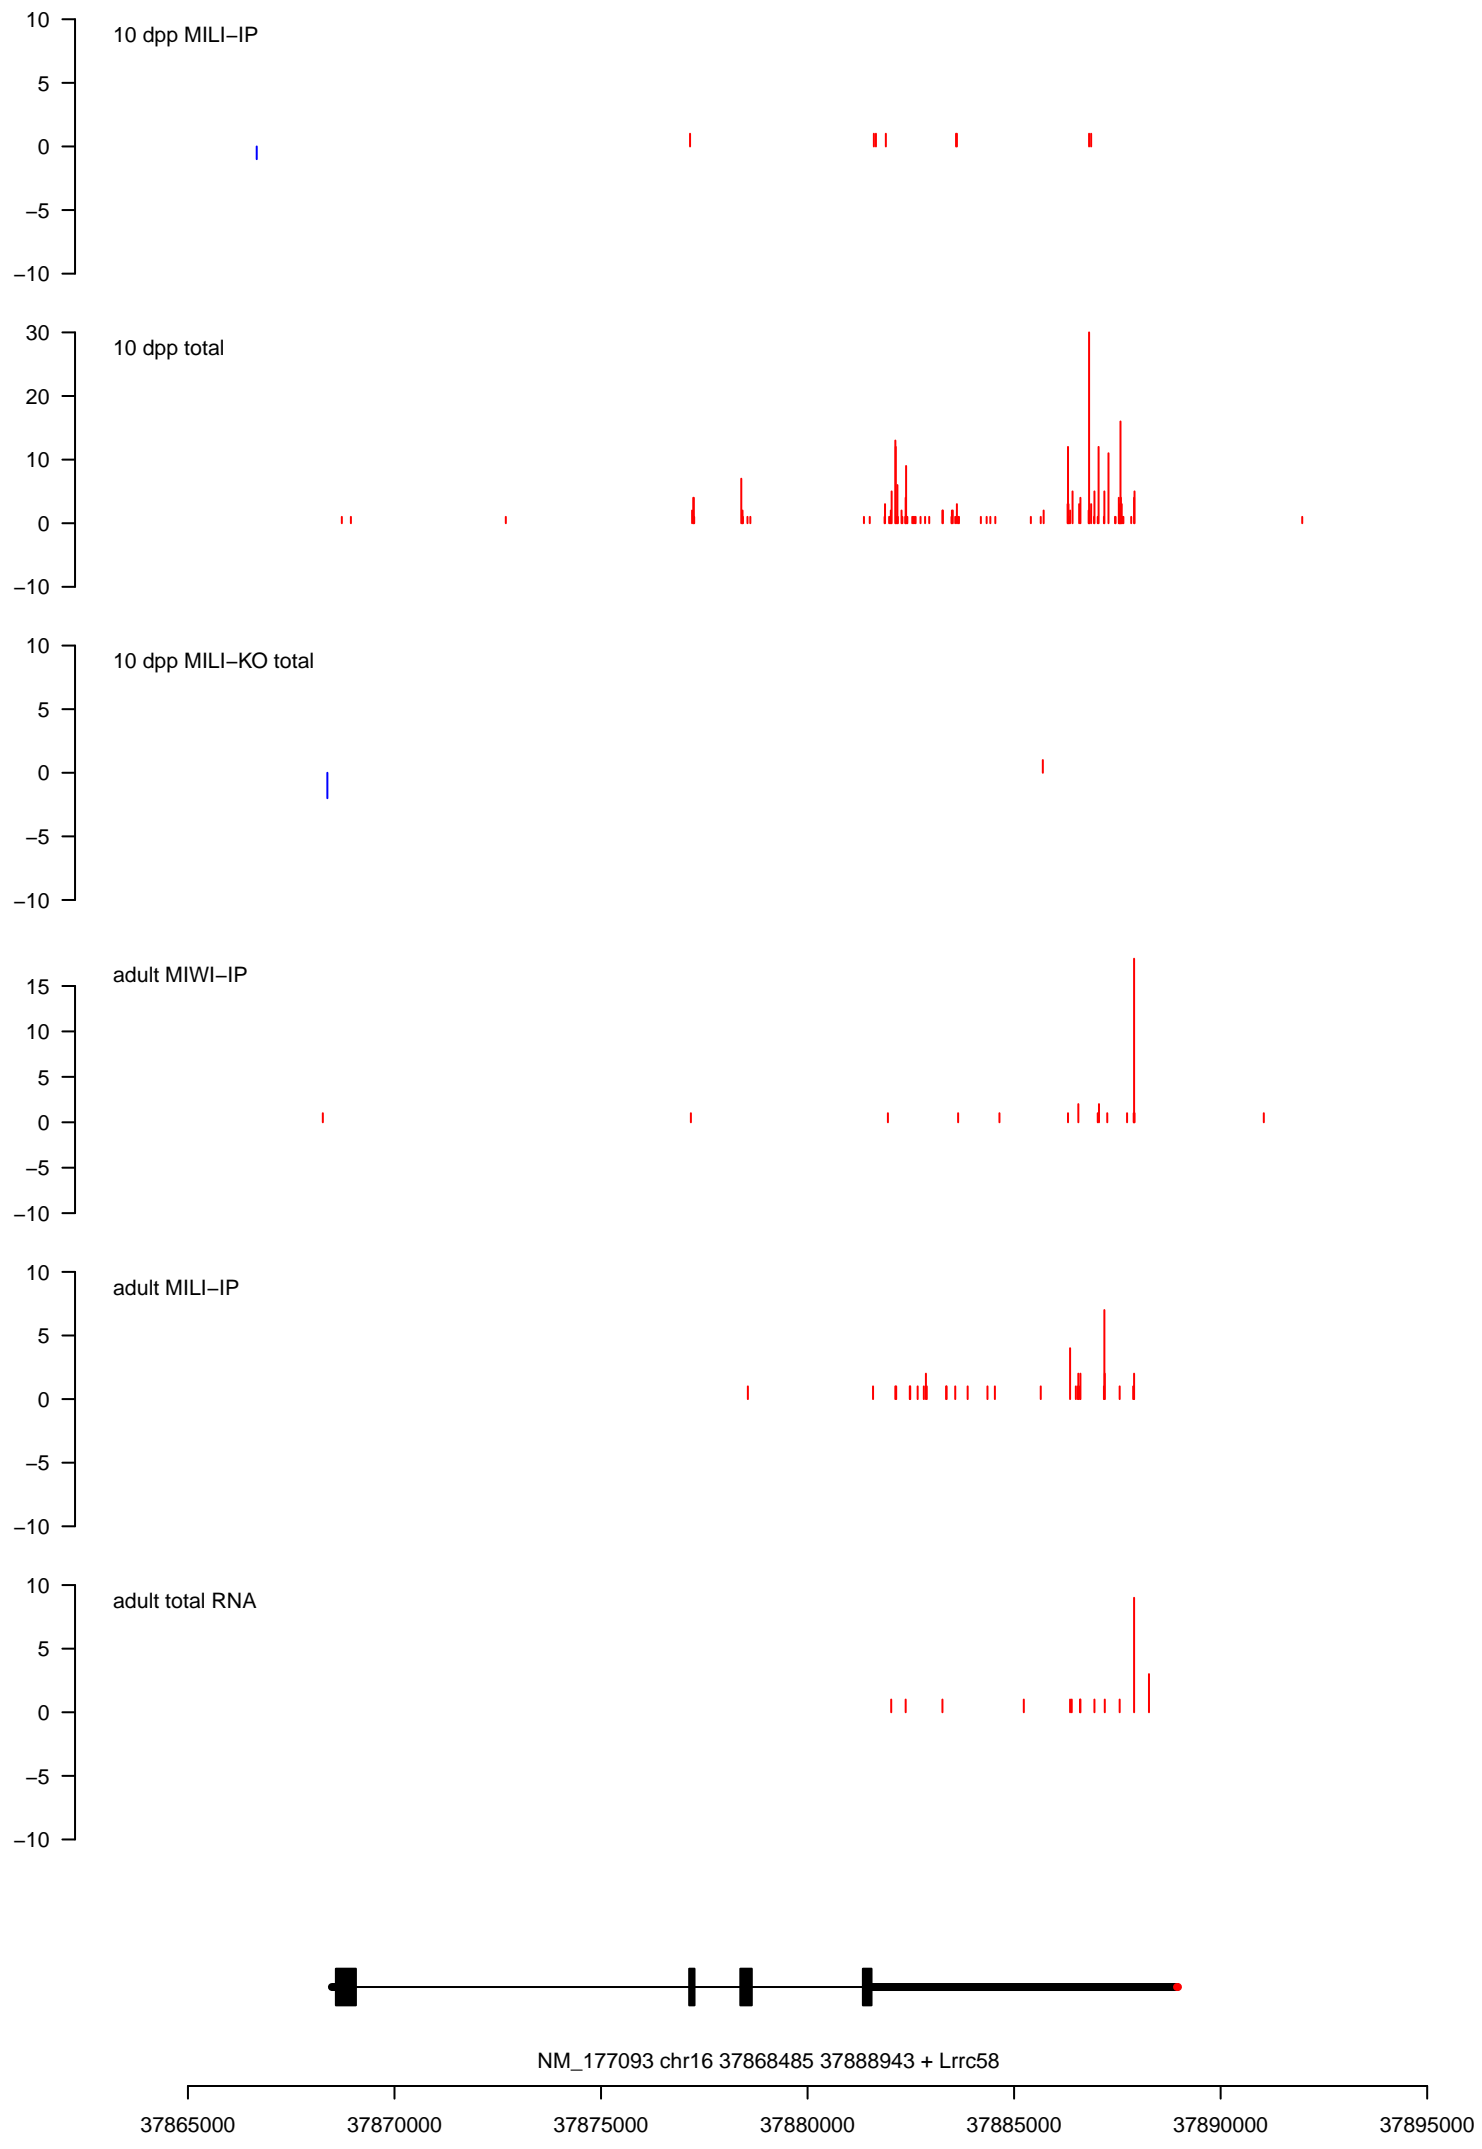



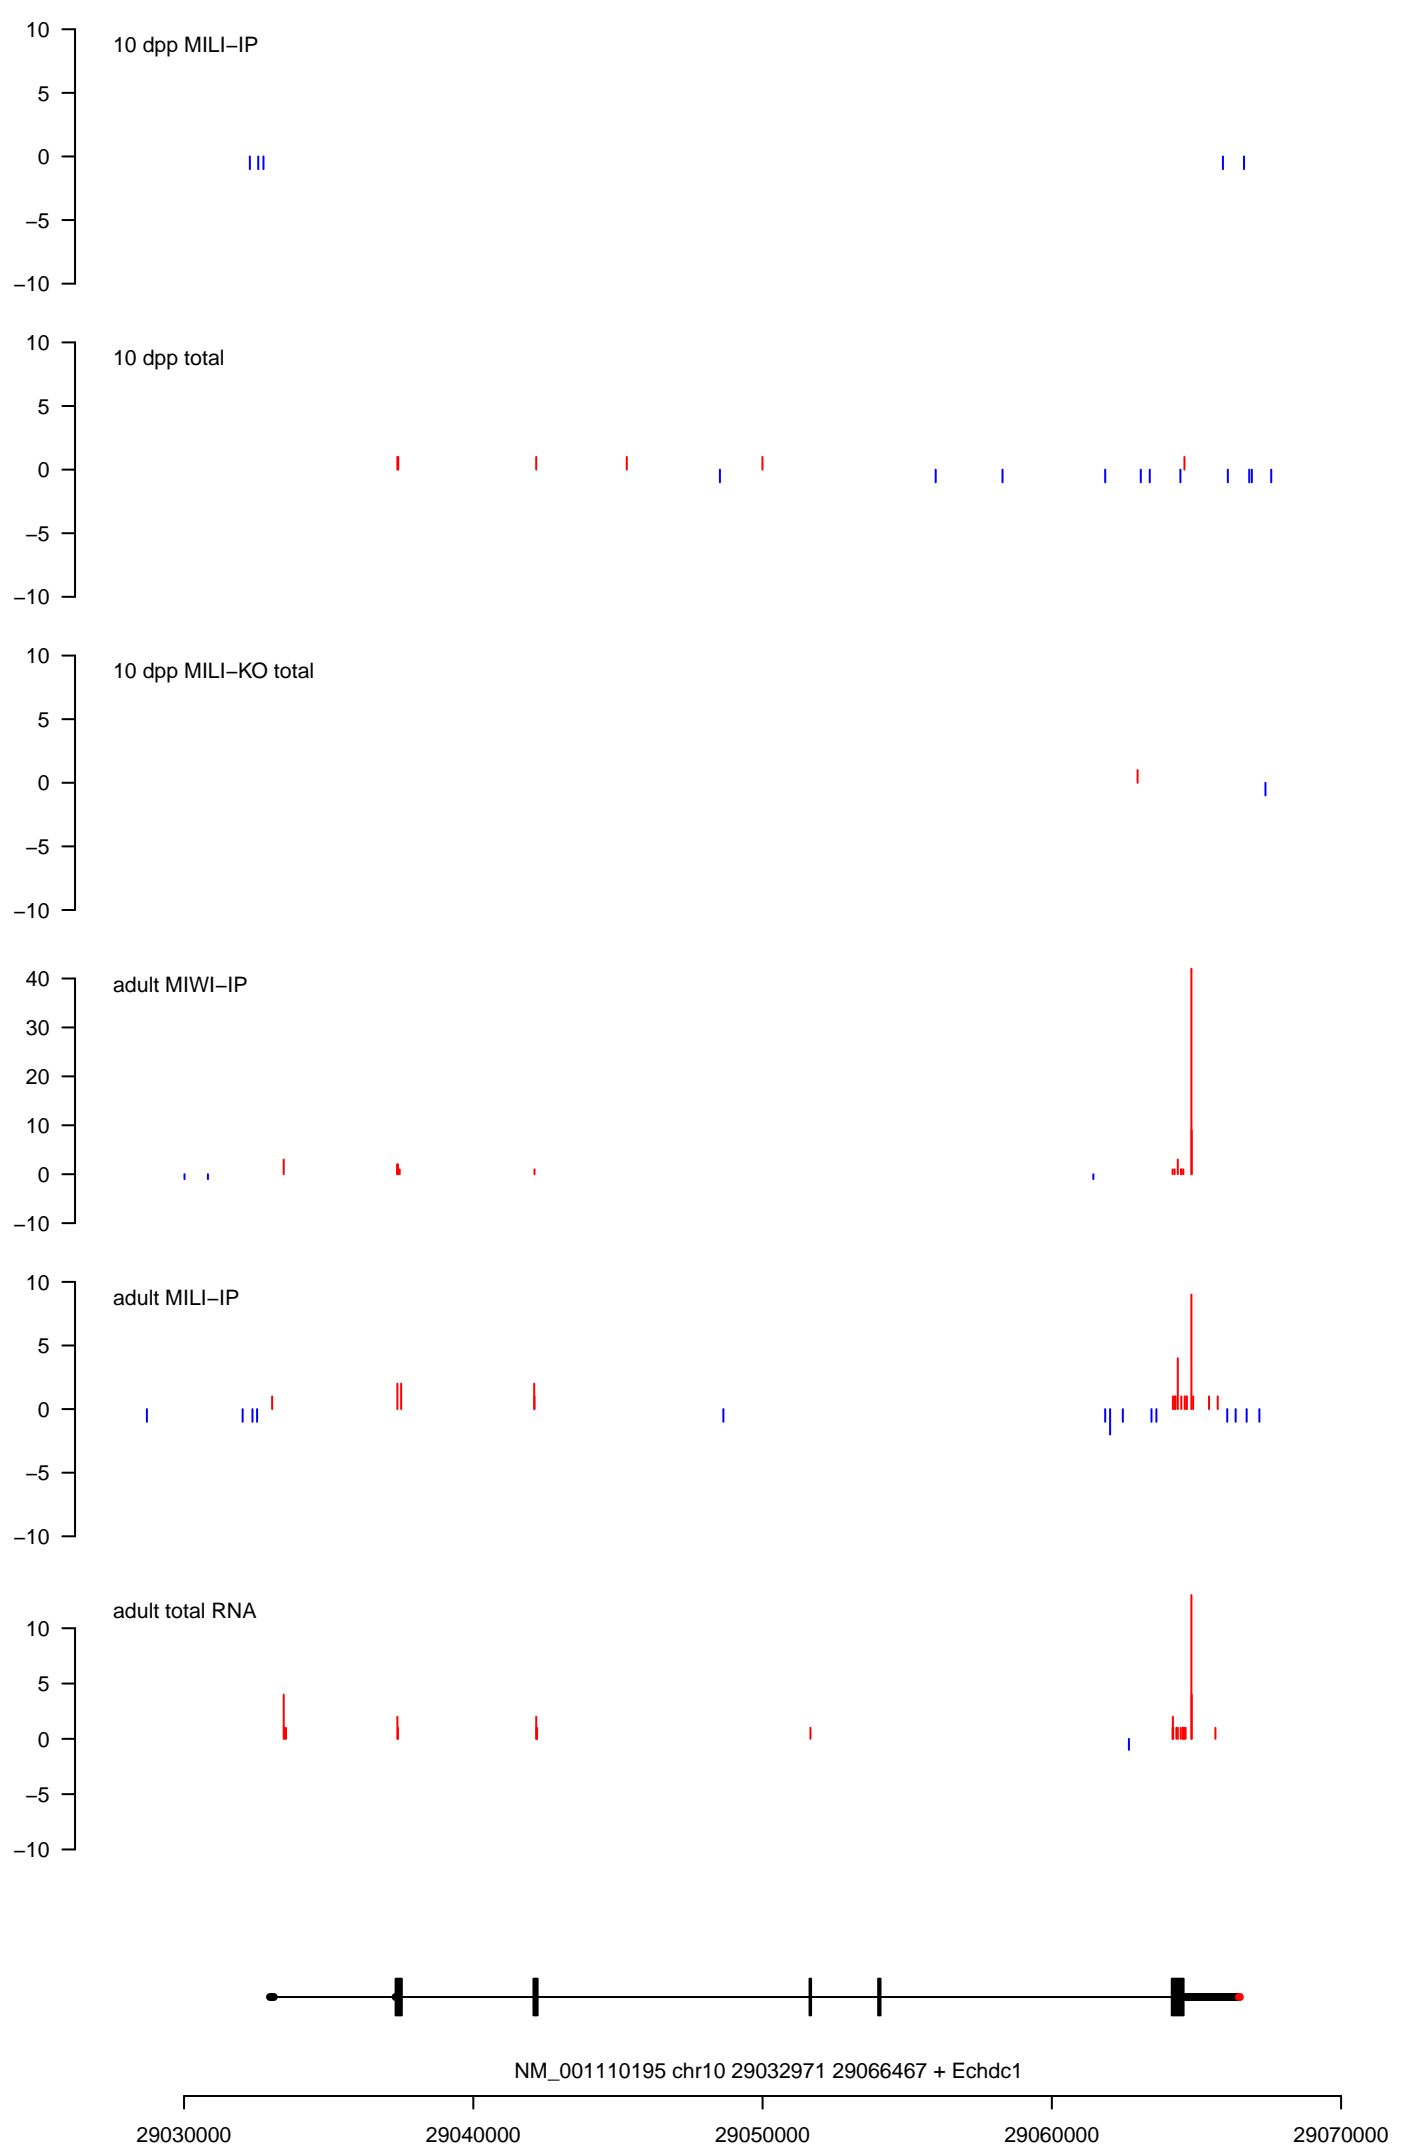

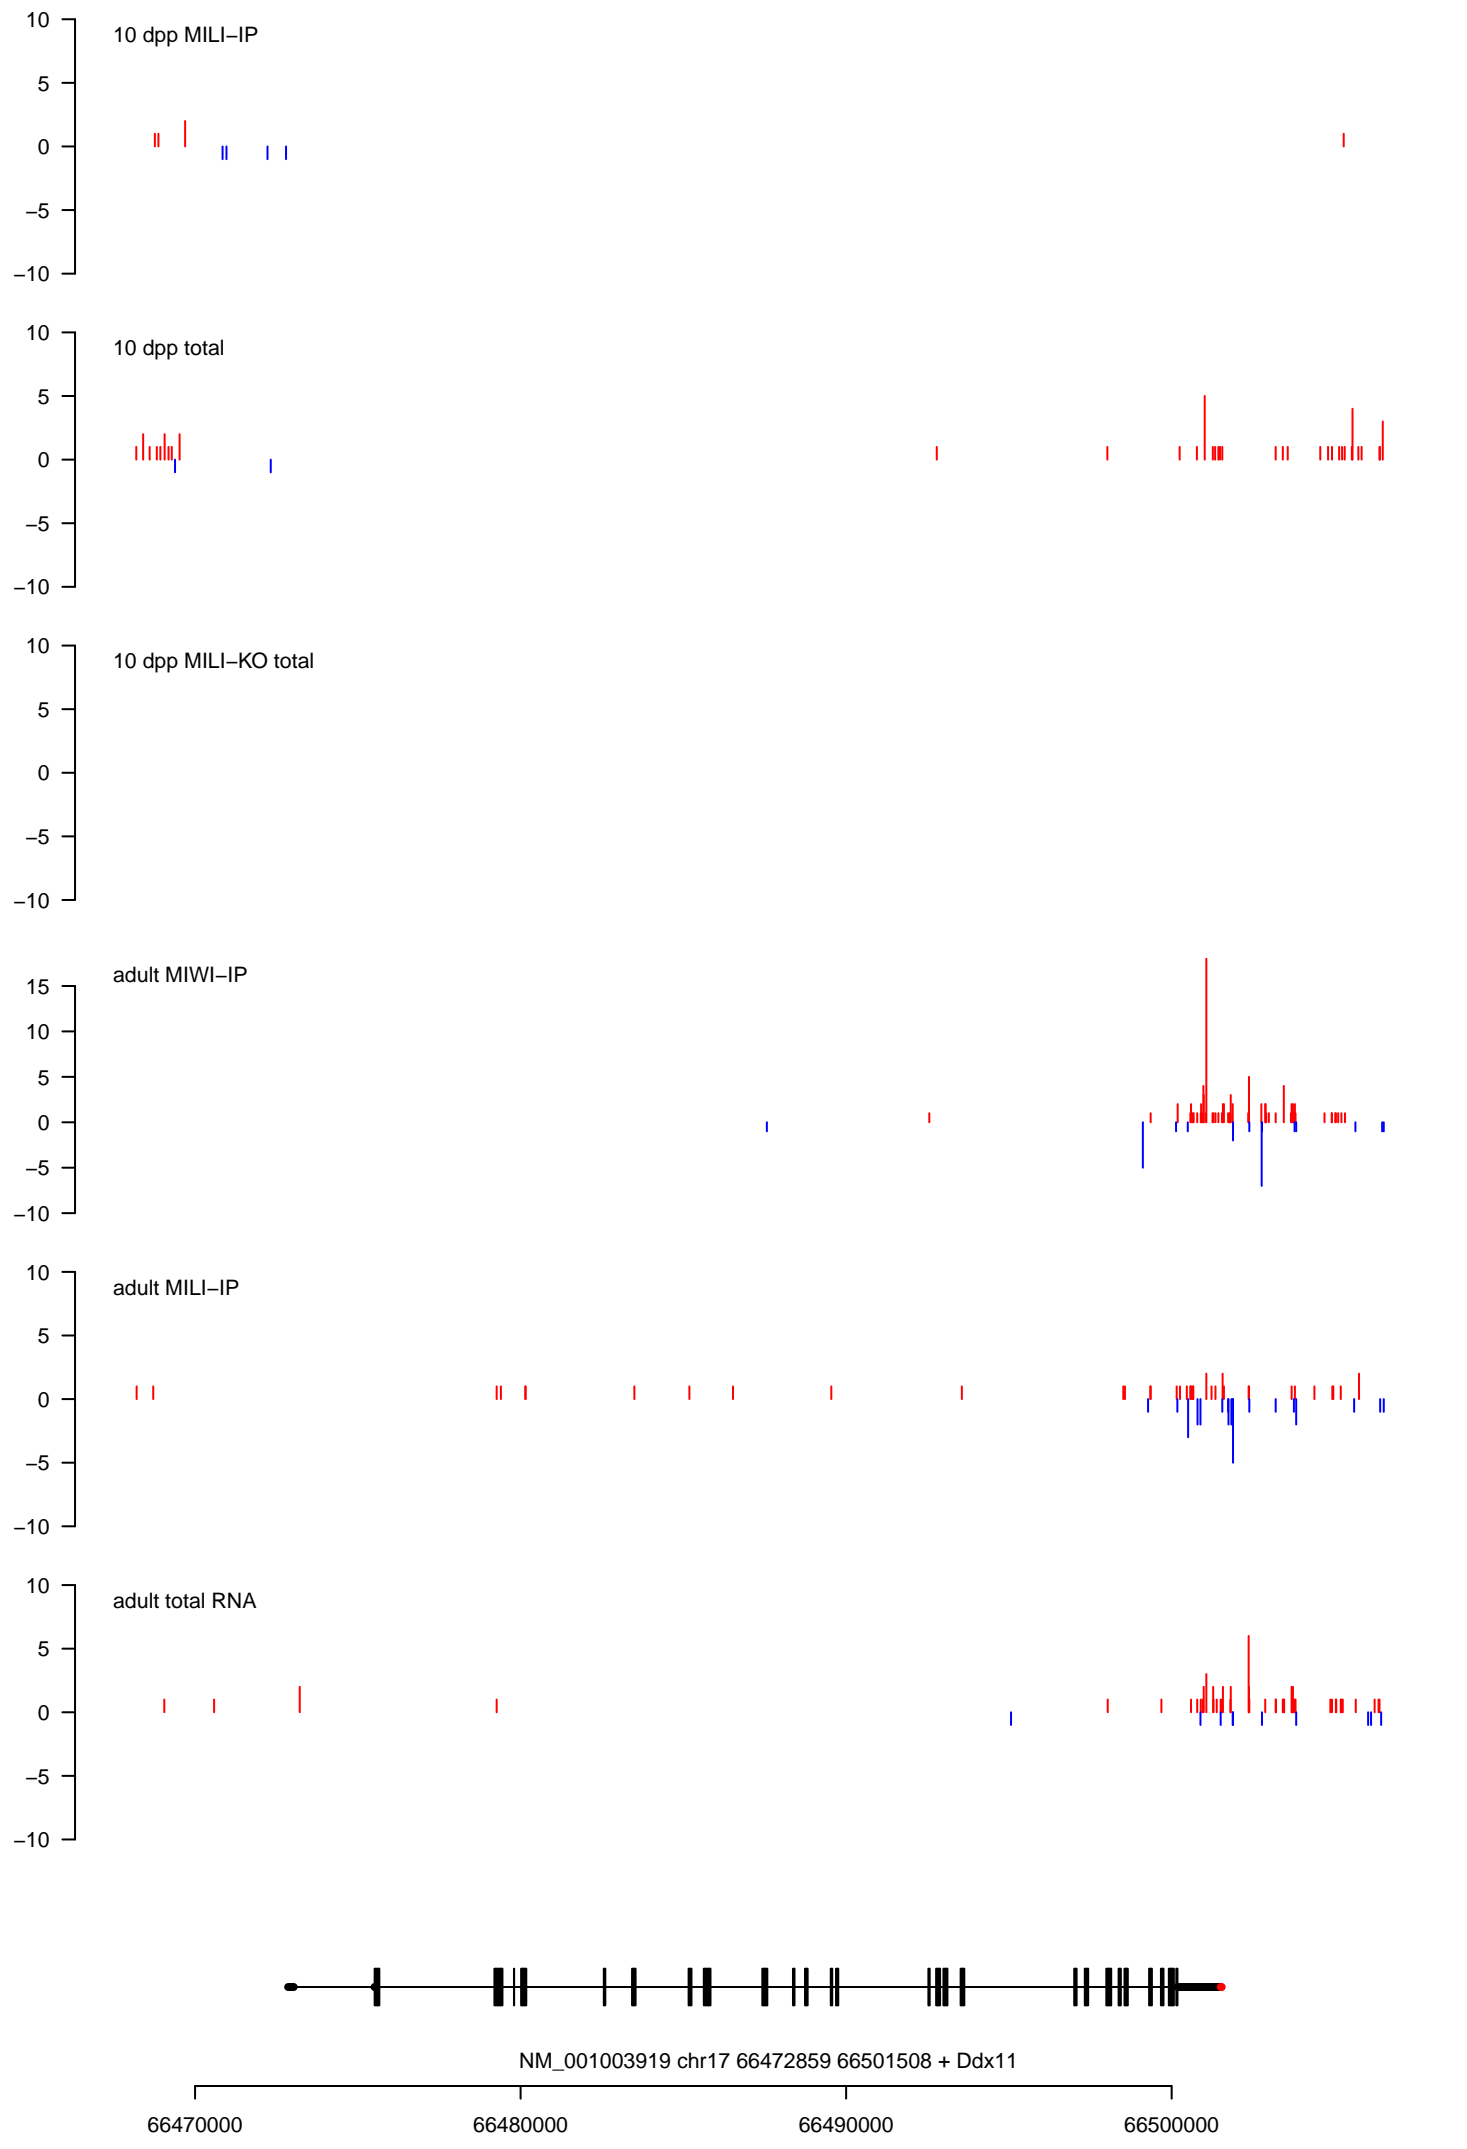

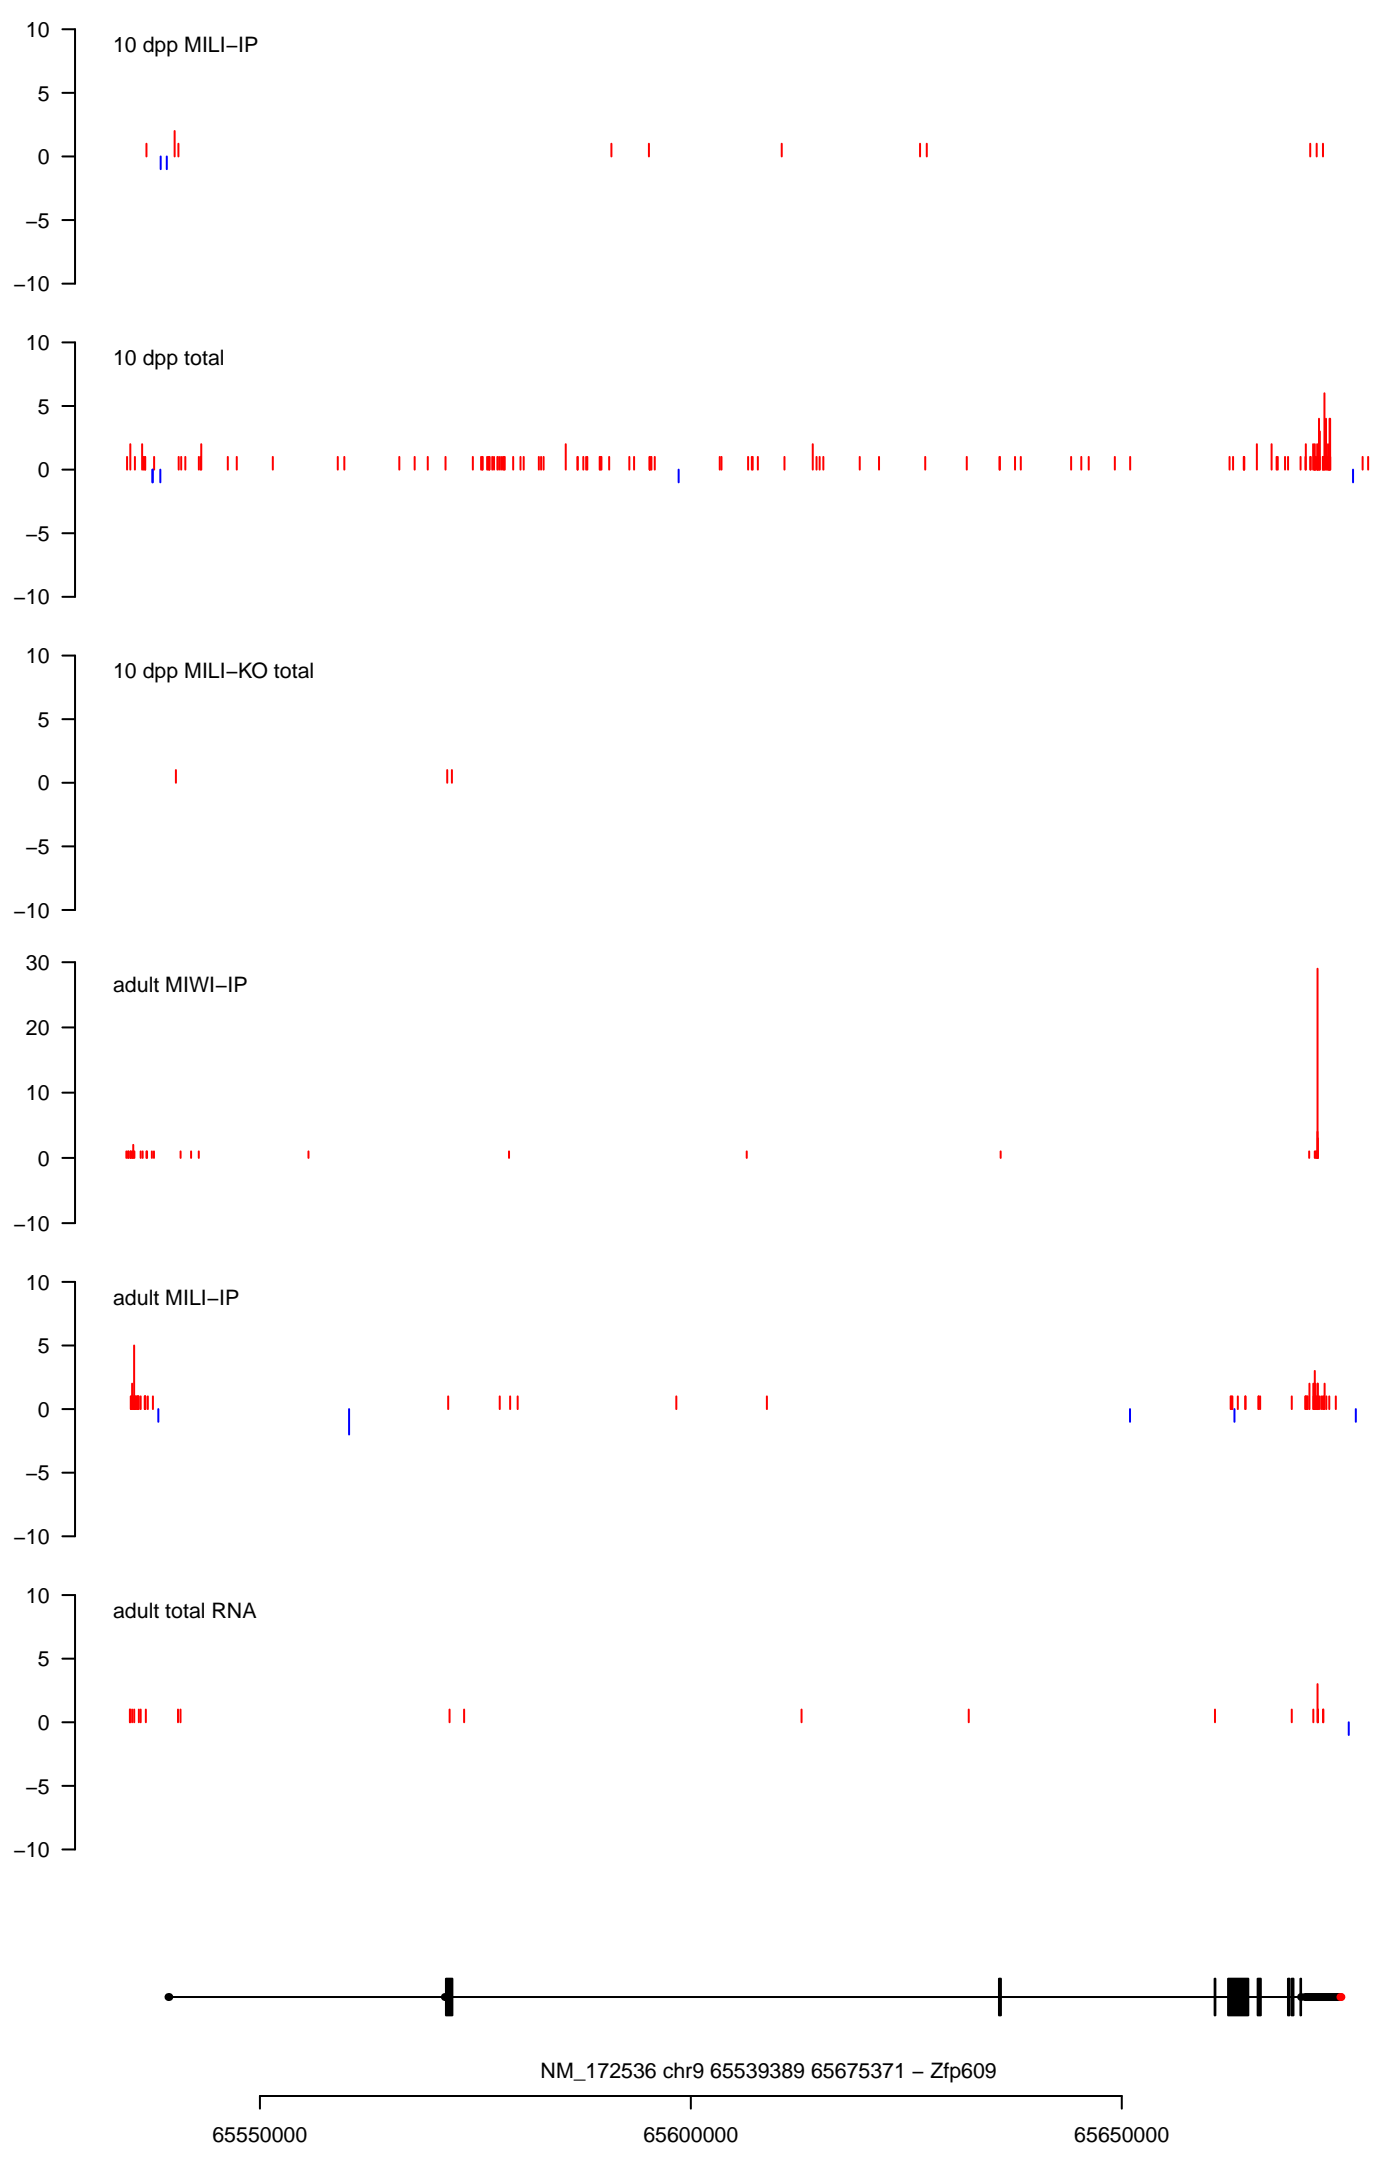

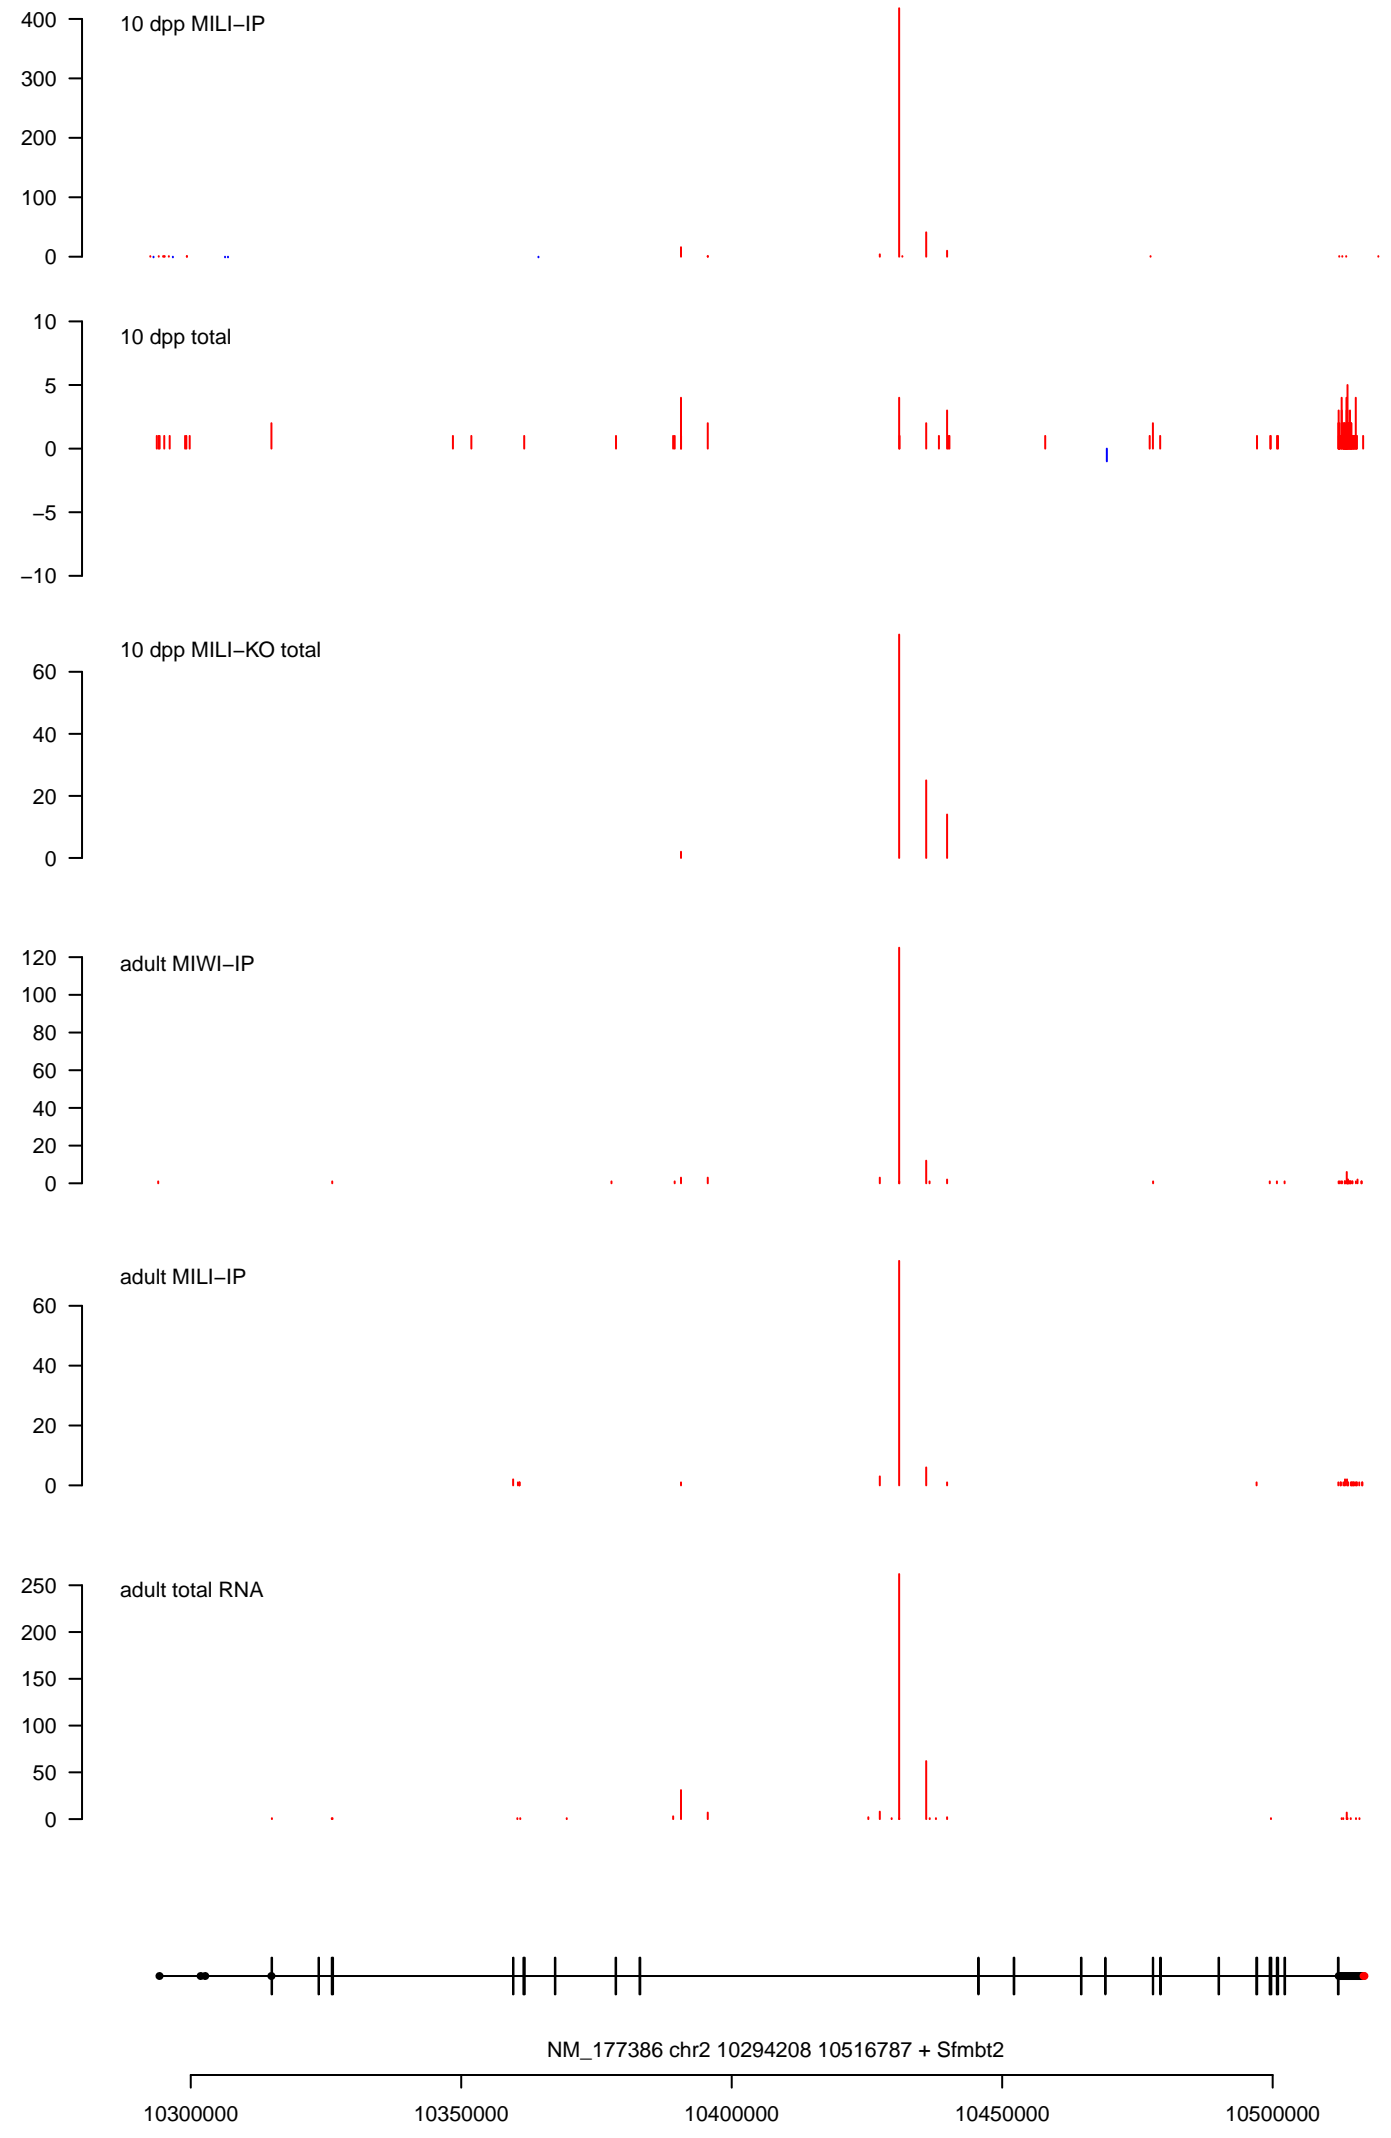

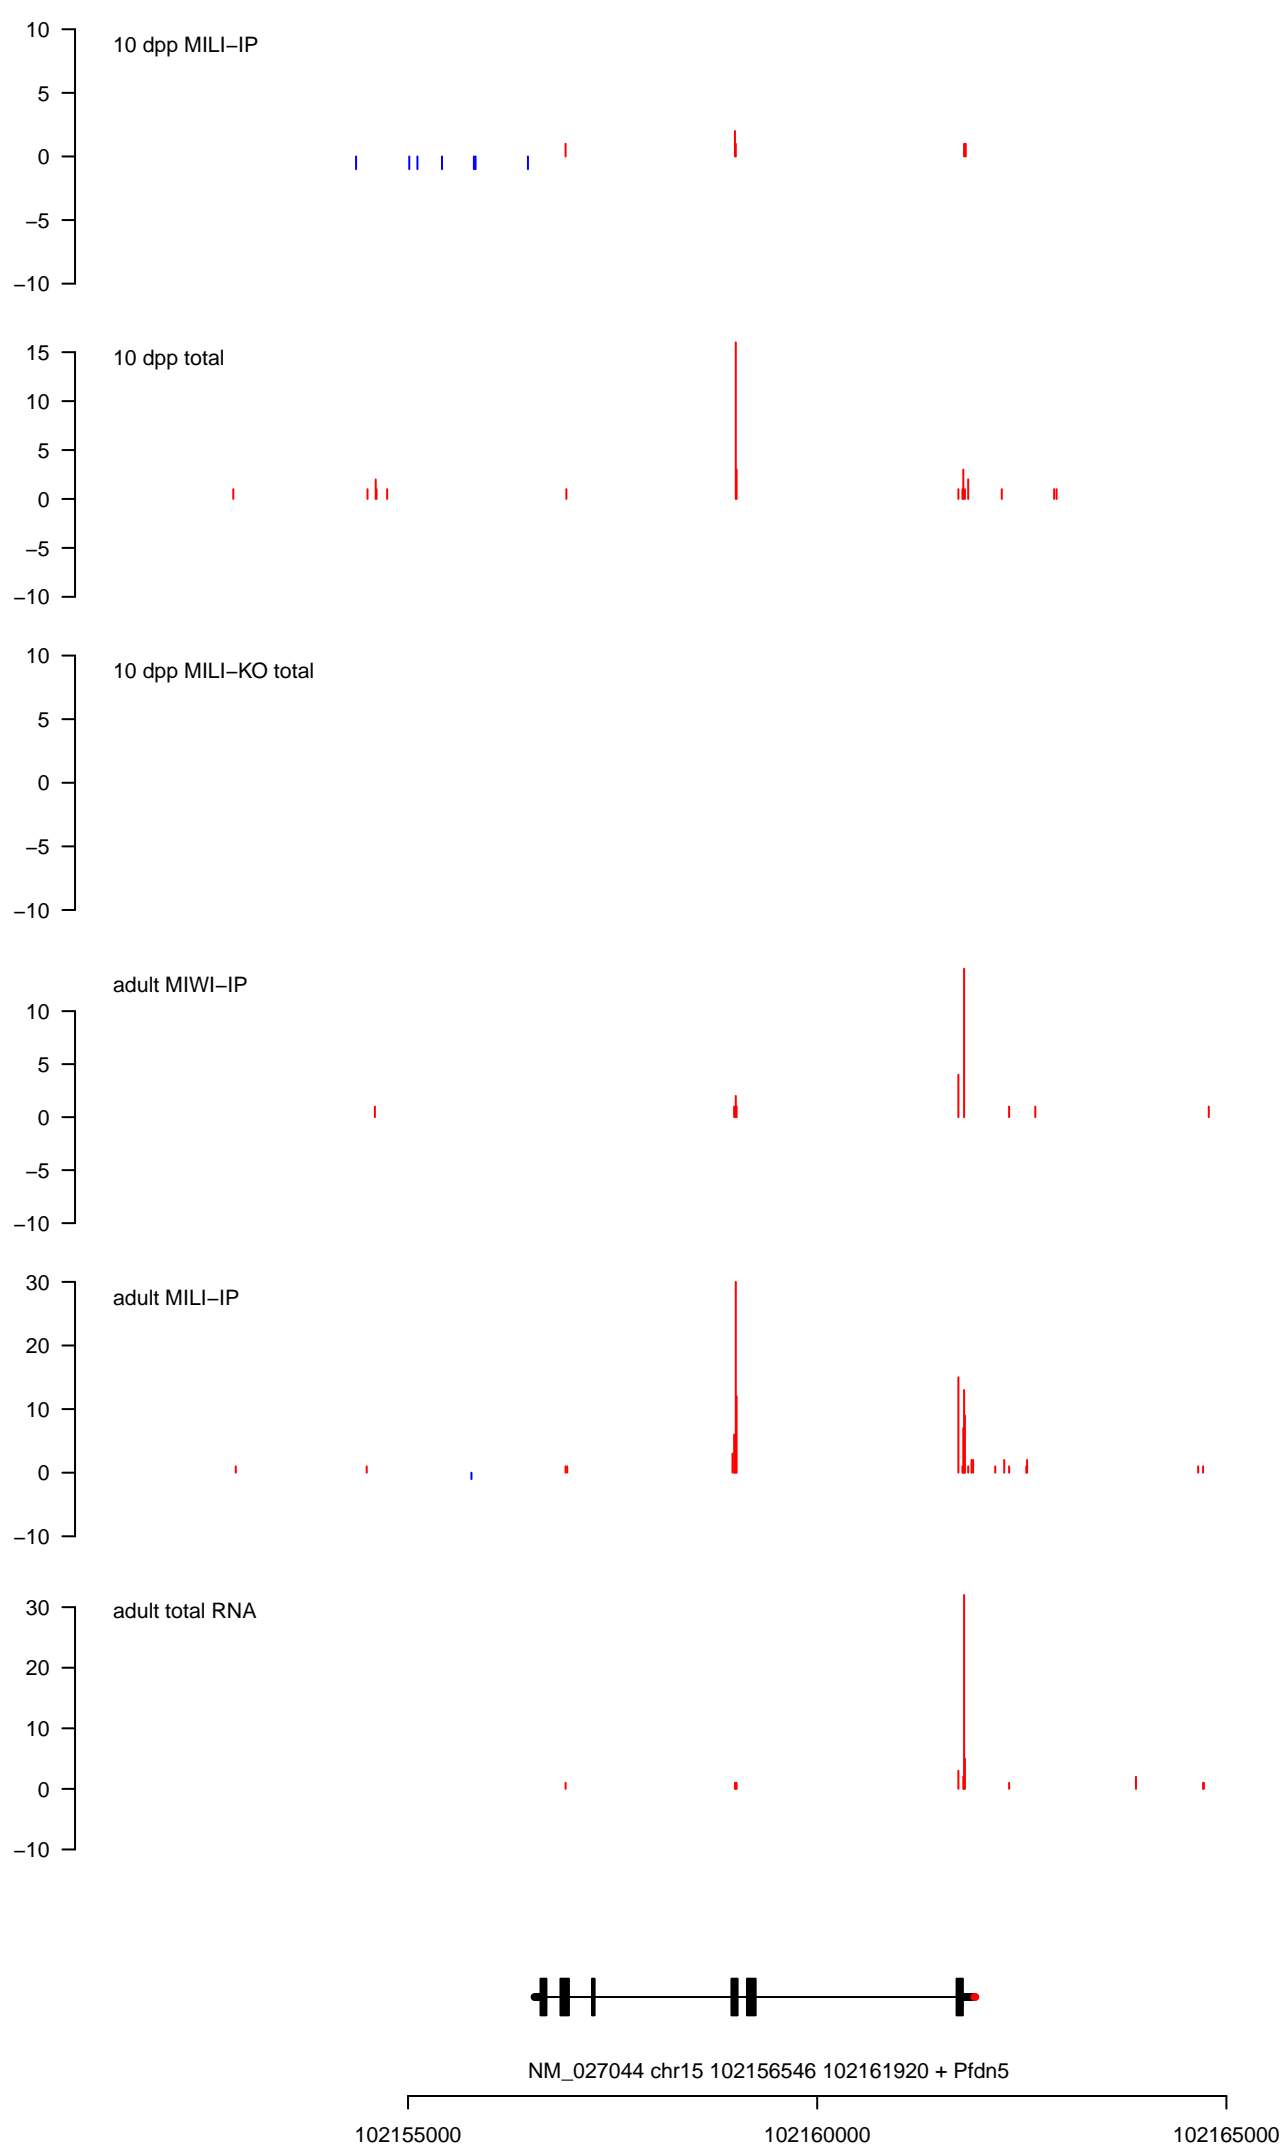

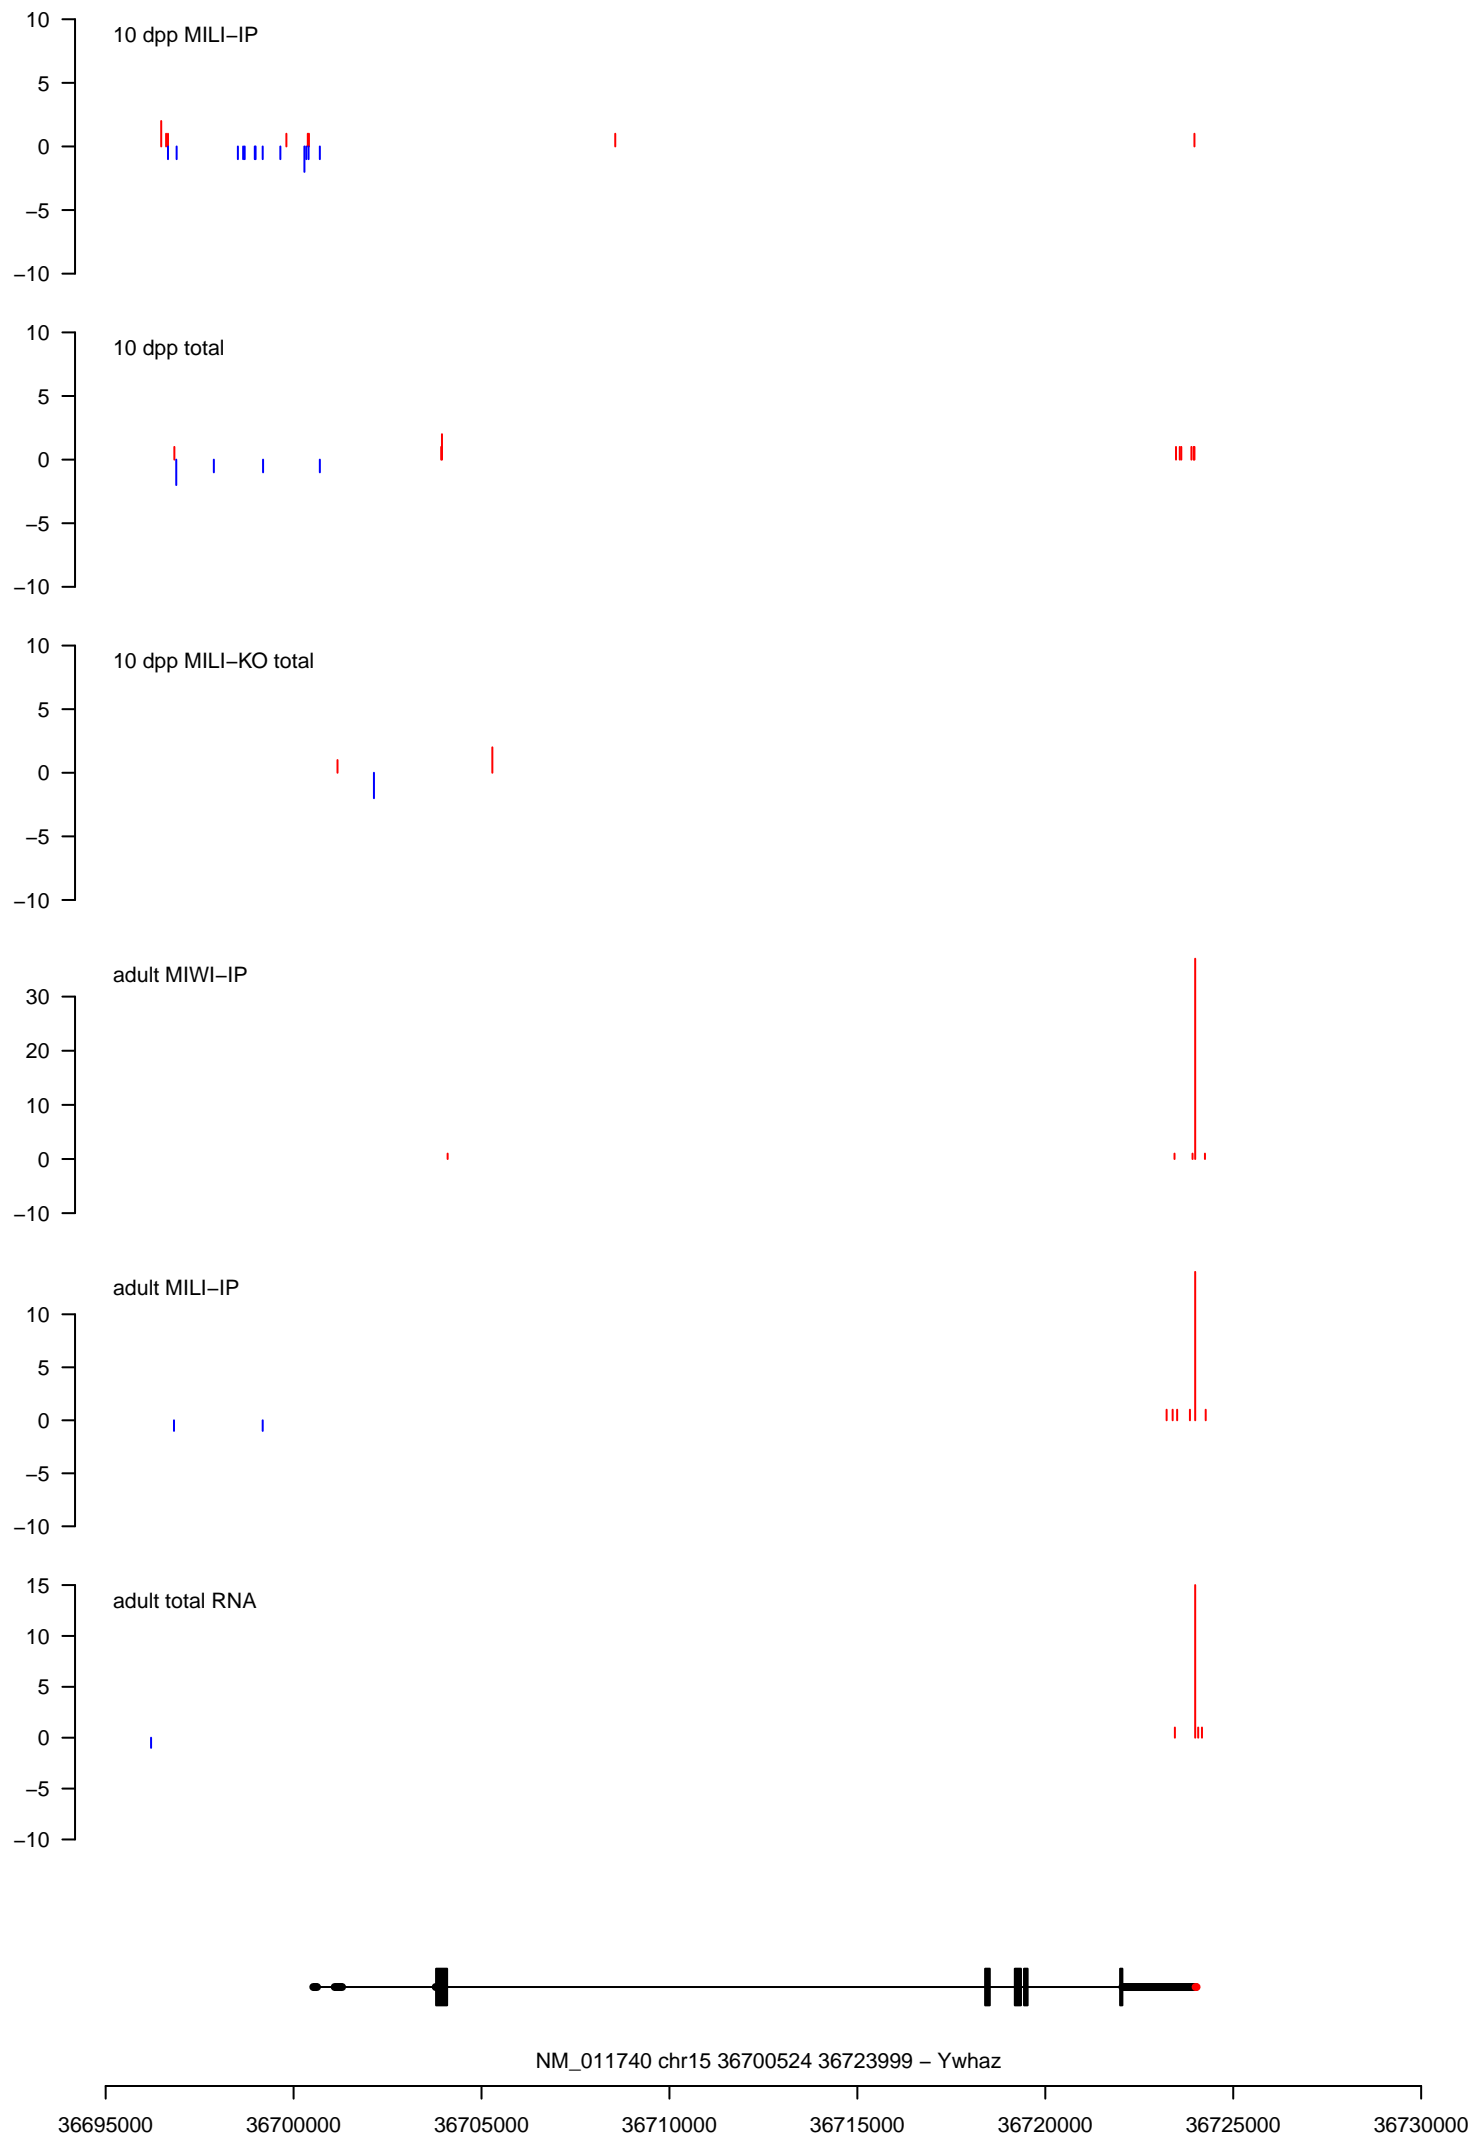

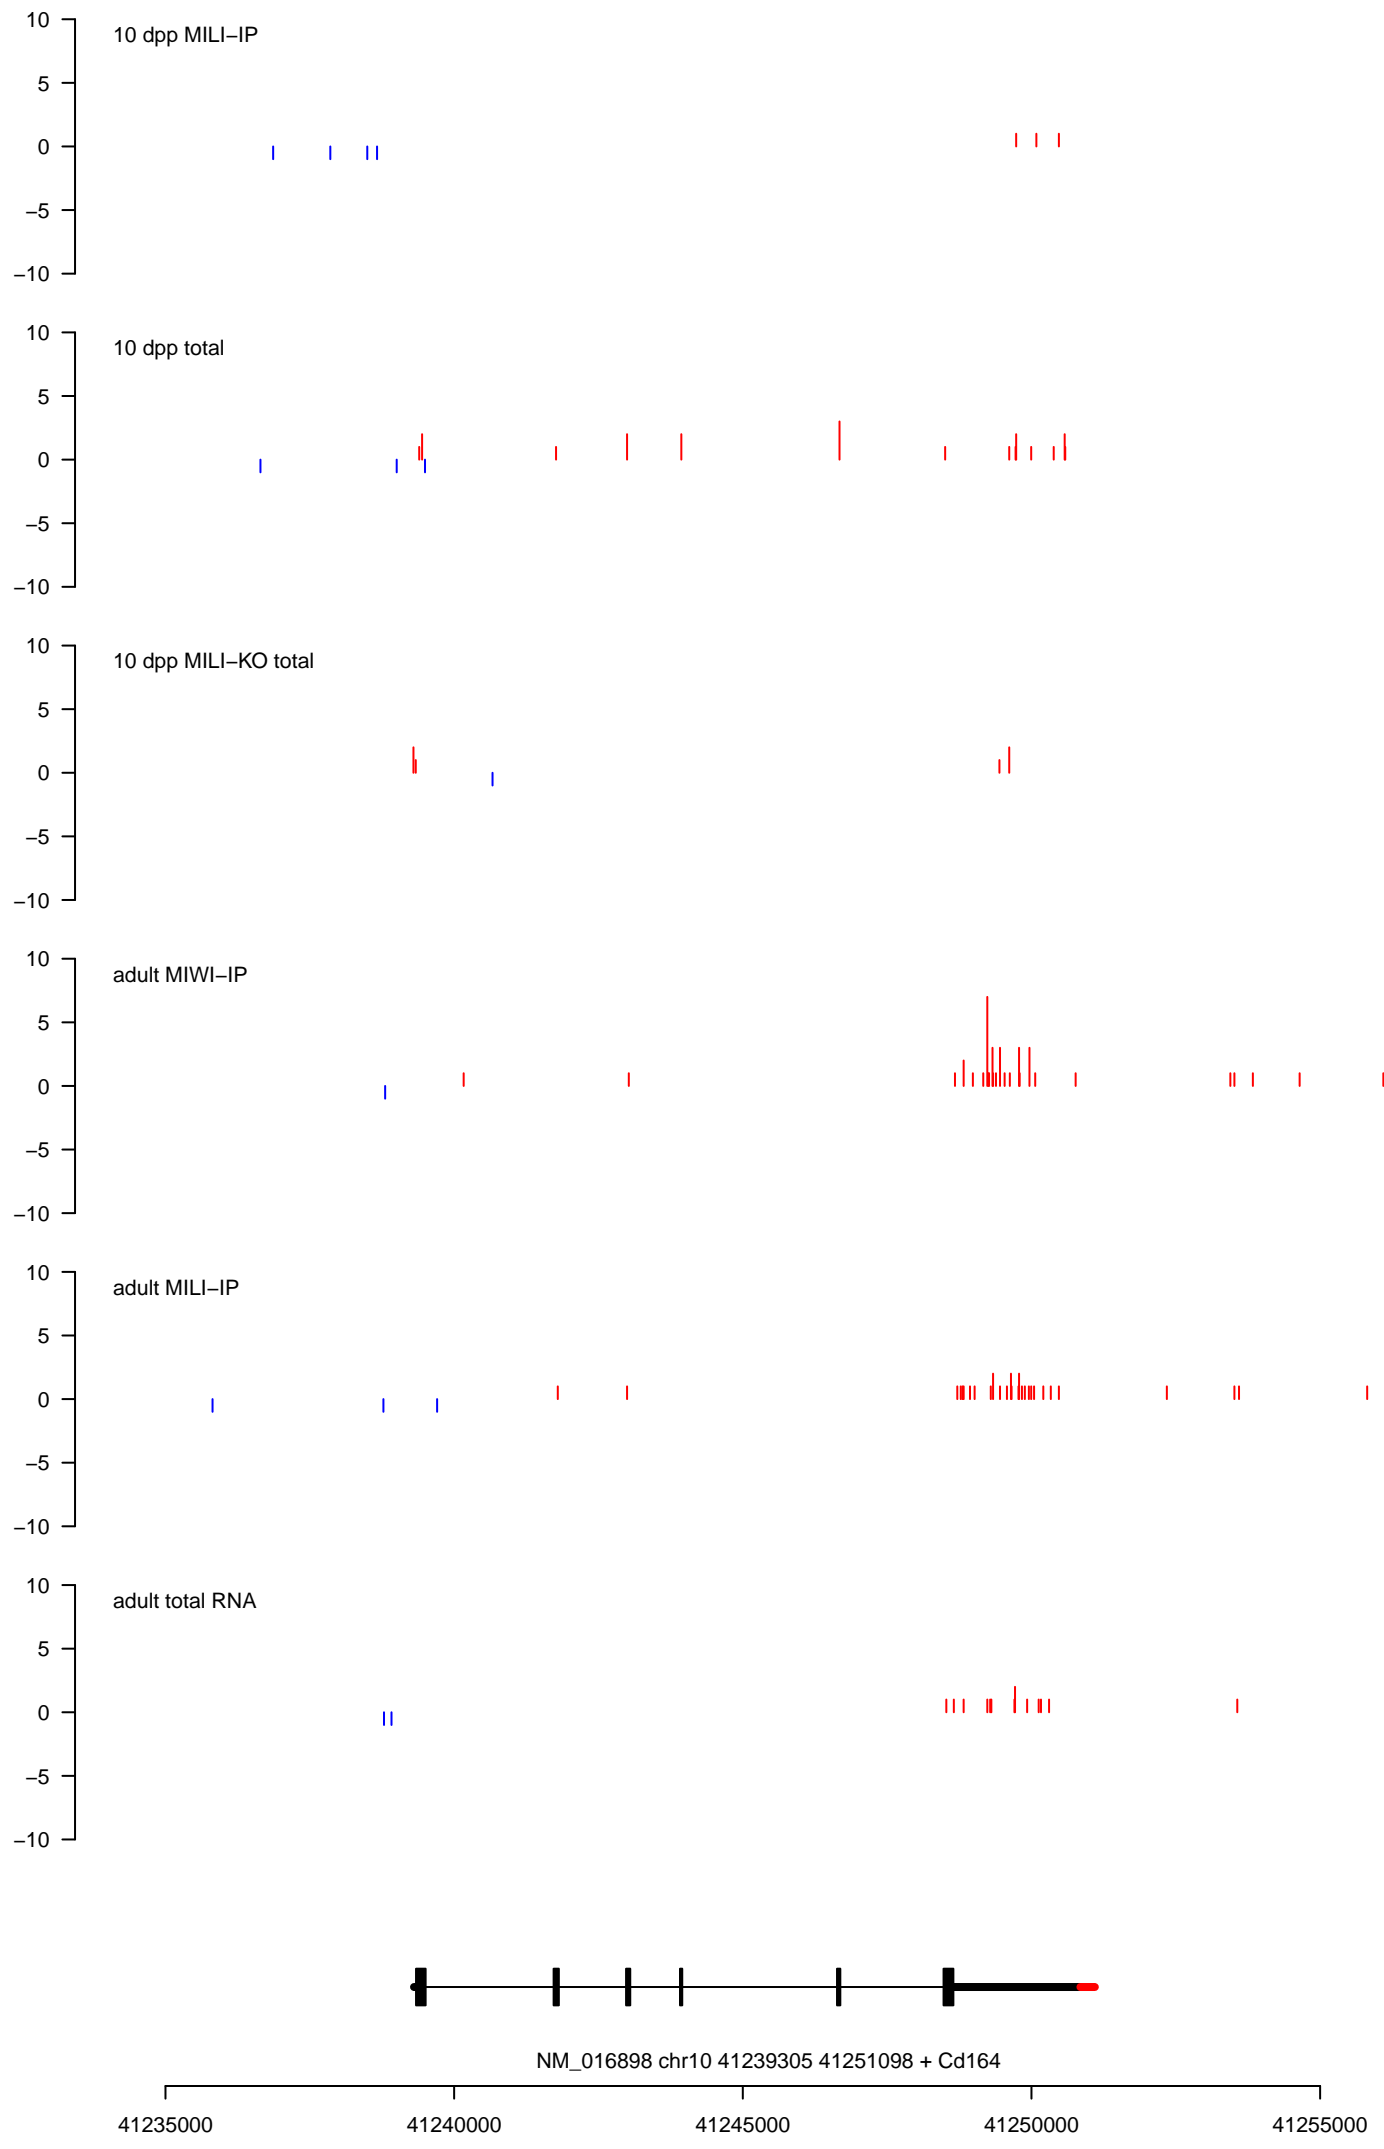

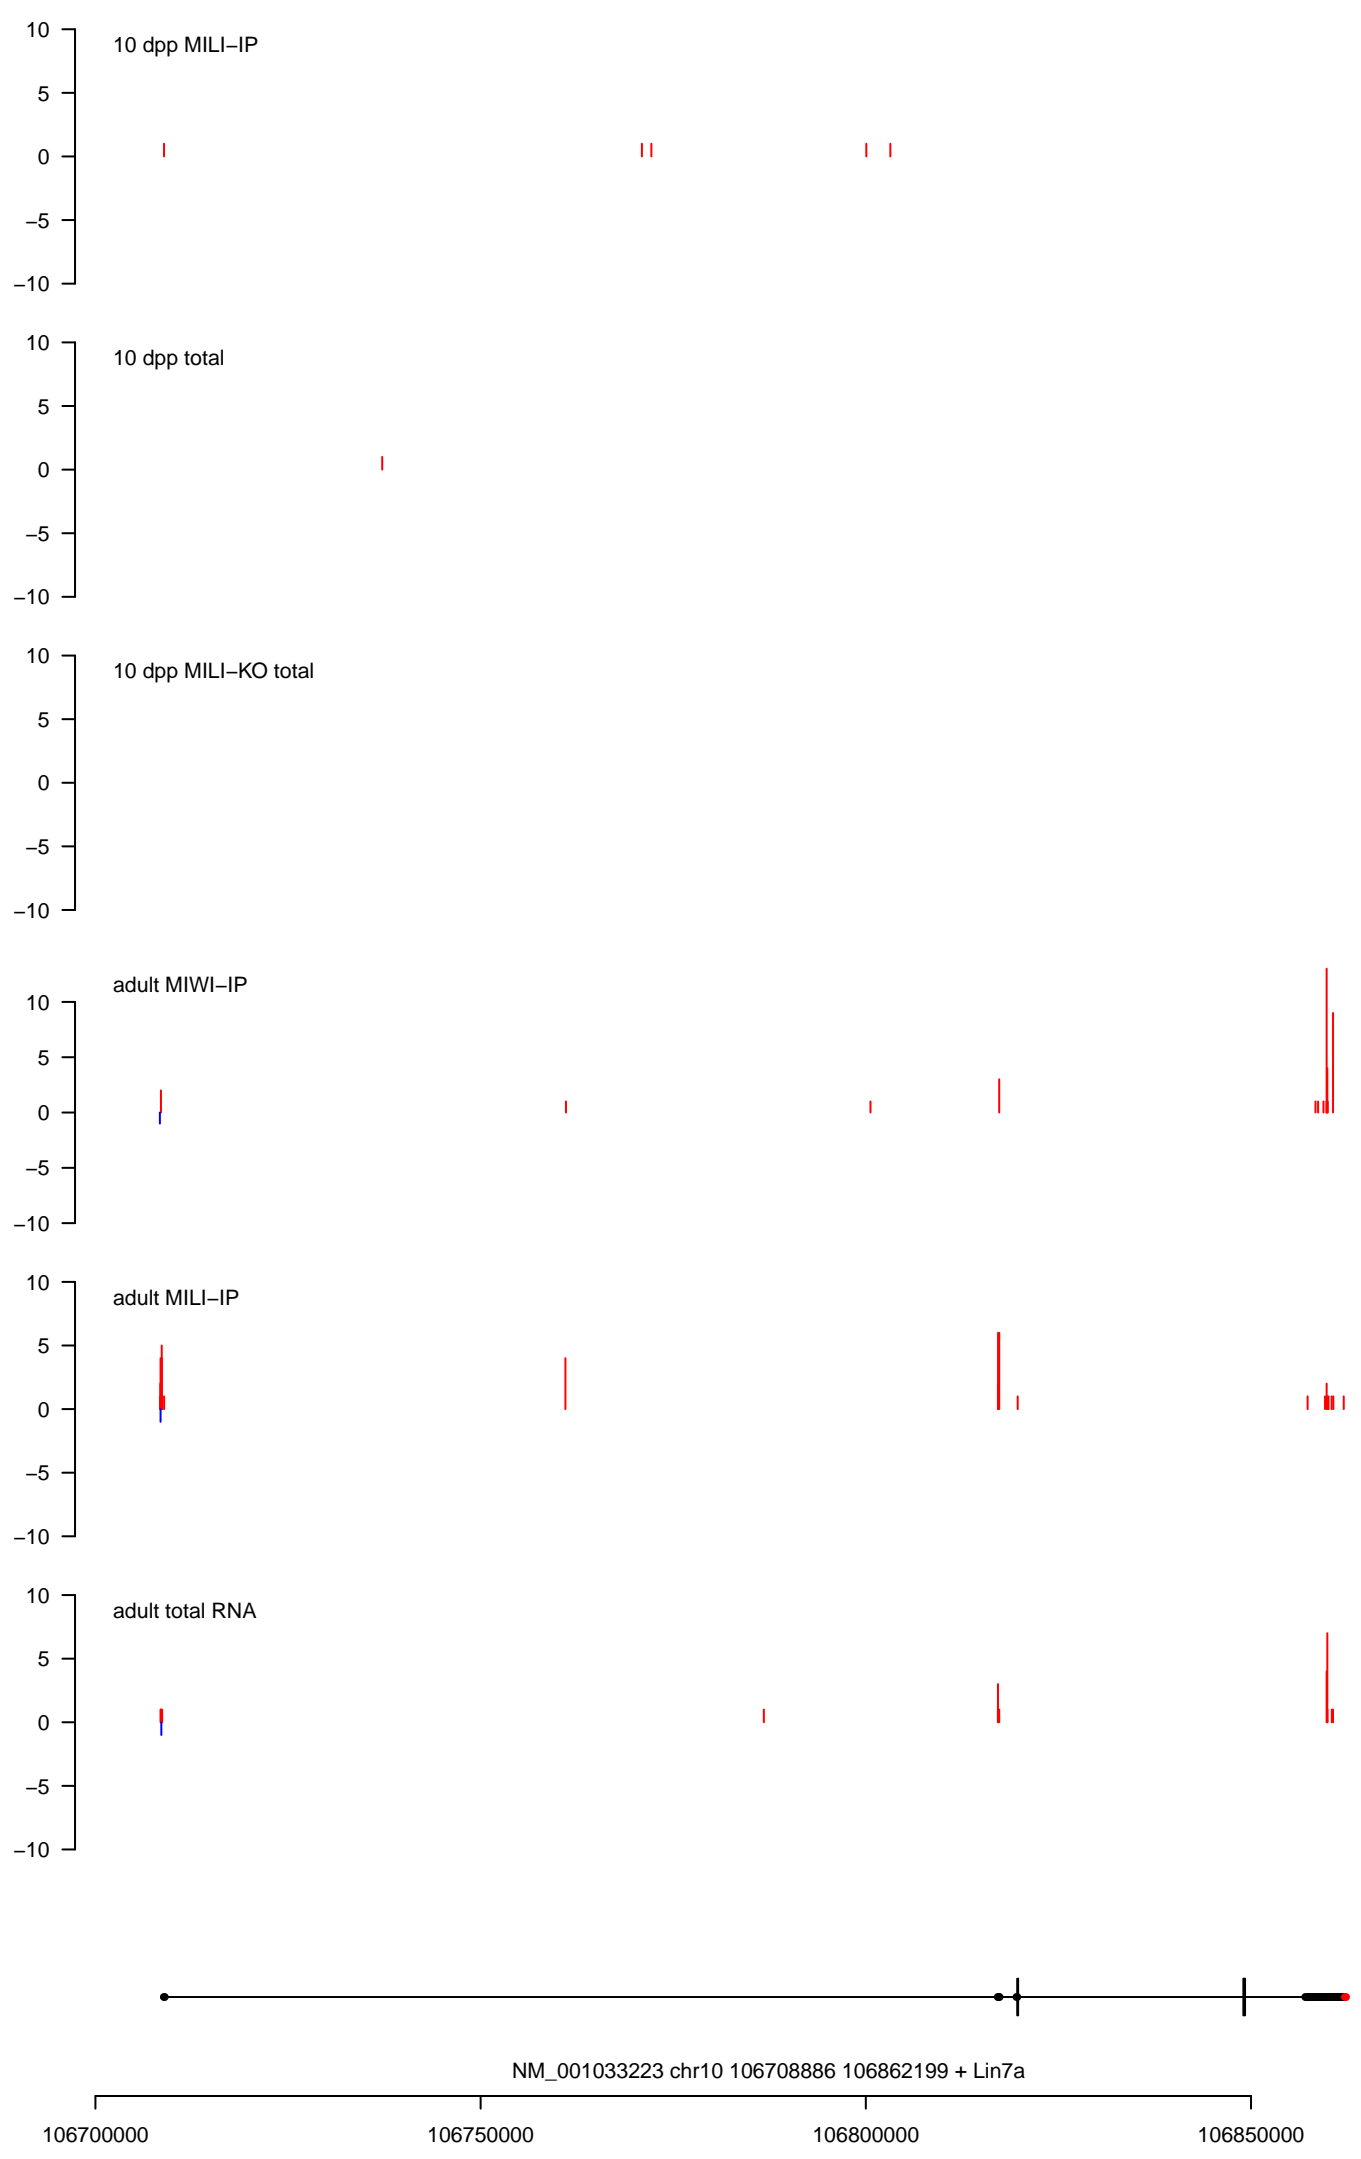





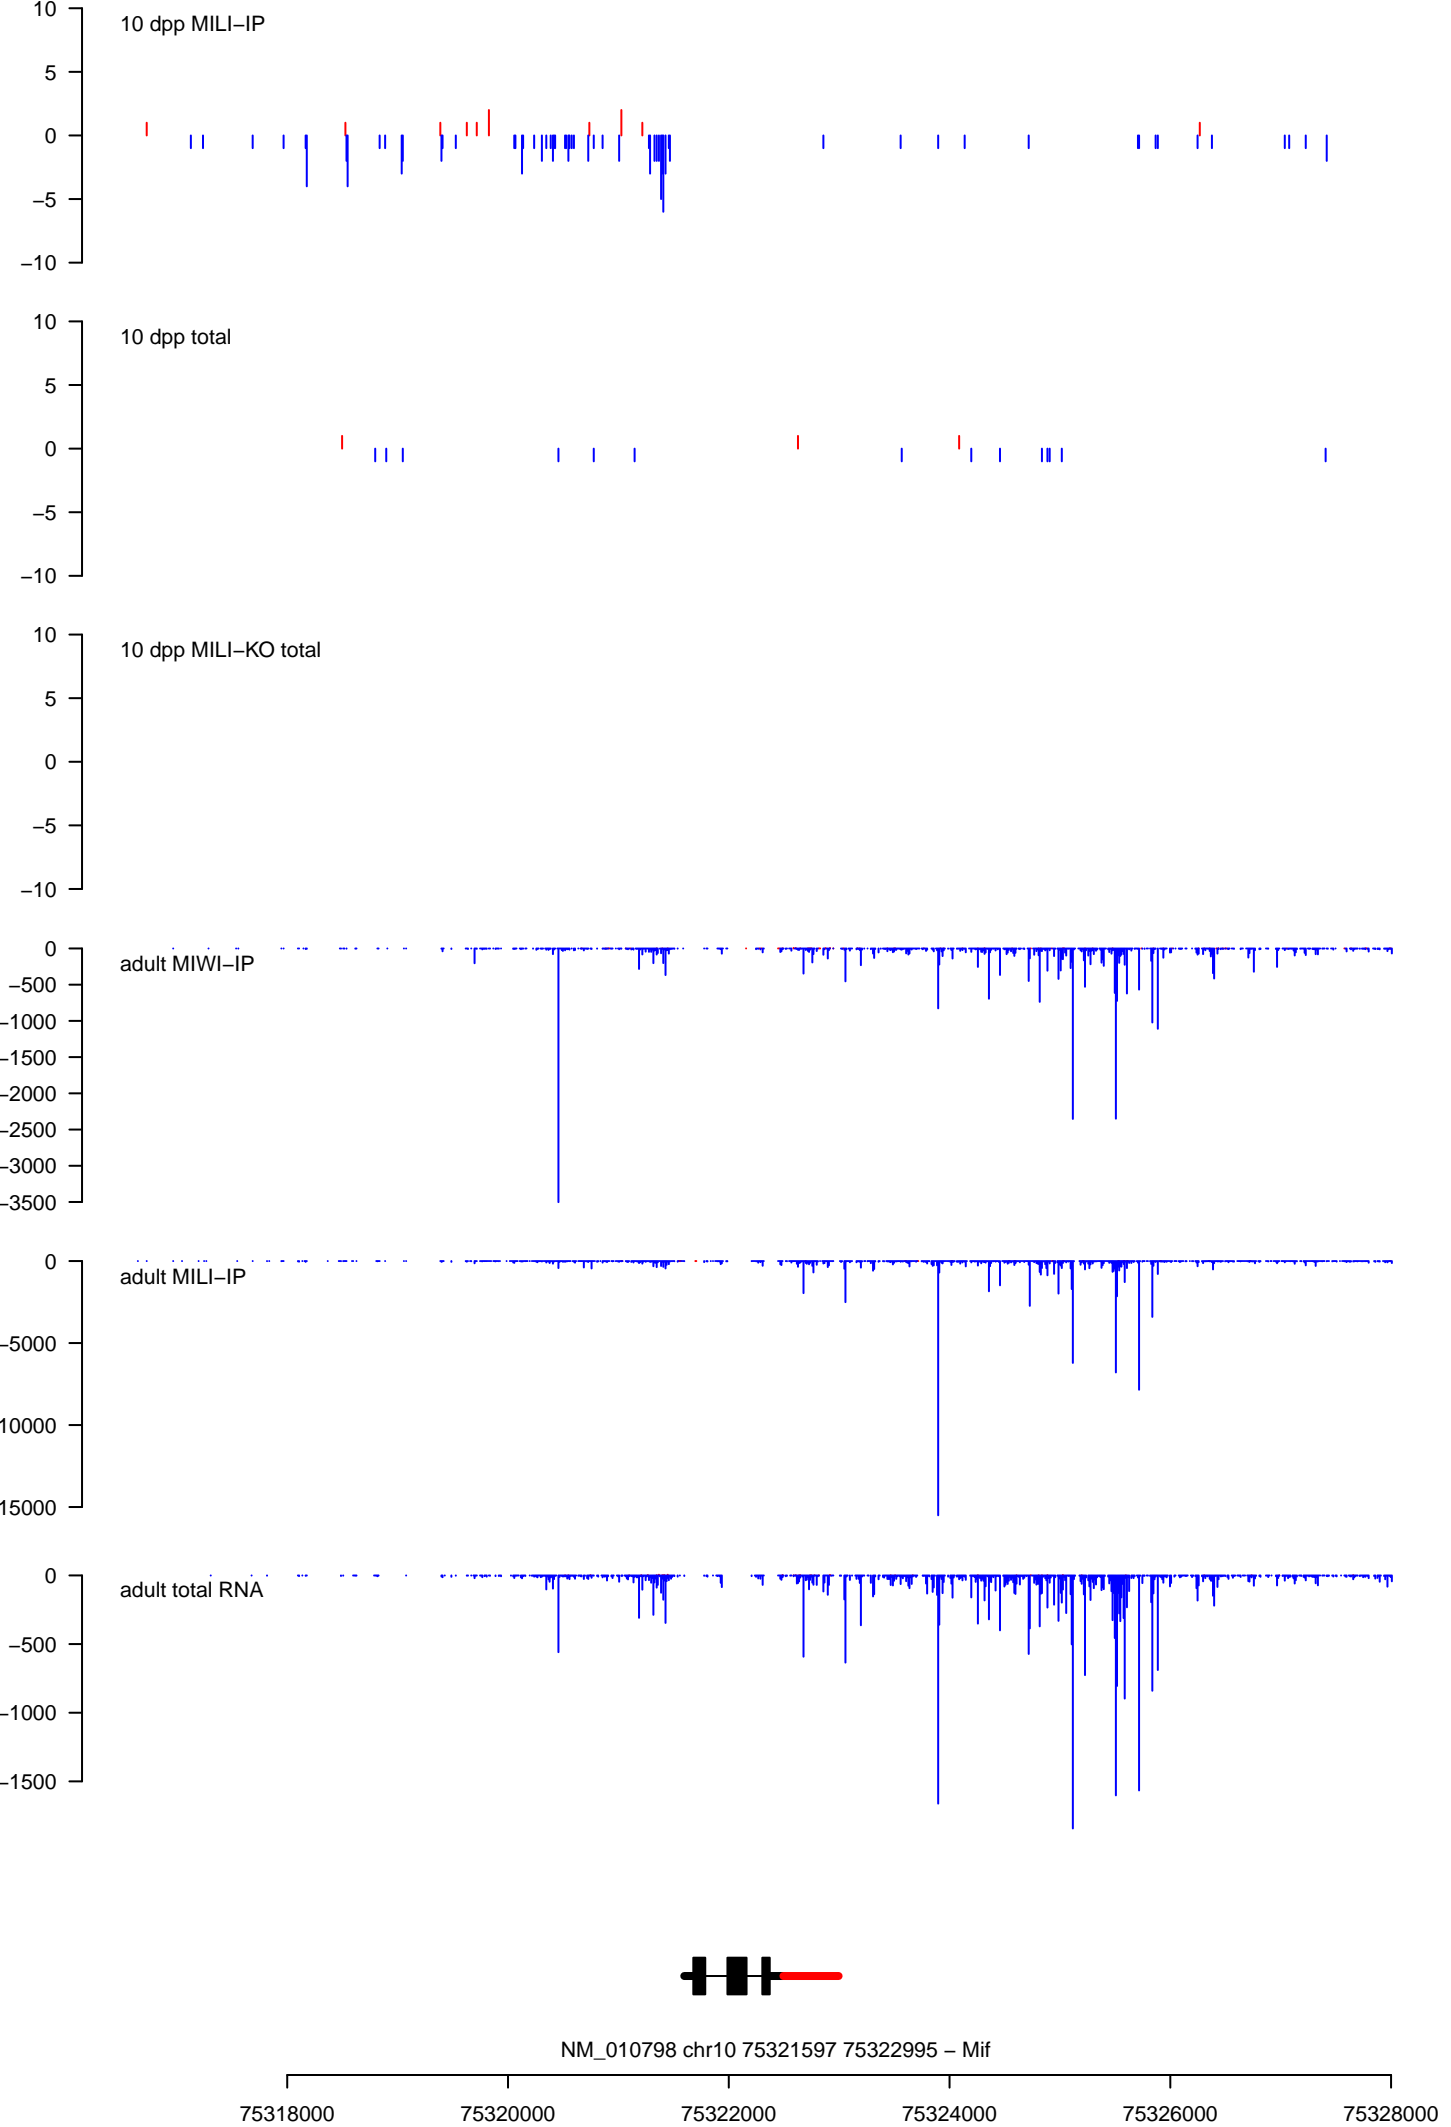

# Supplemental Data

NR\_026924 chr1 : 93301458 – 93302606 – 1700020N18Rik

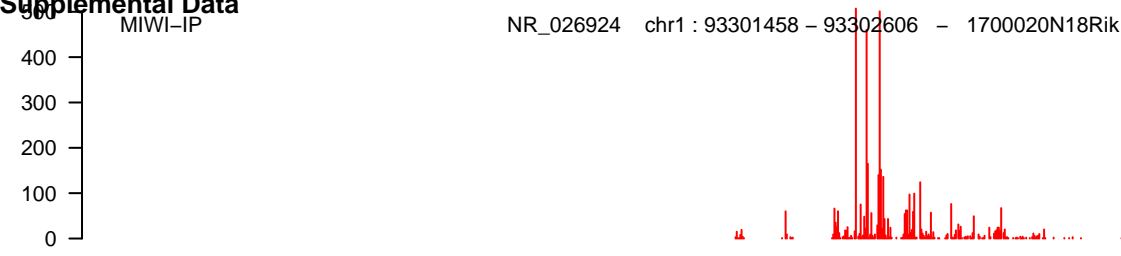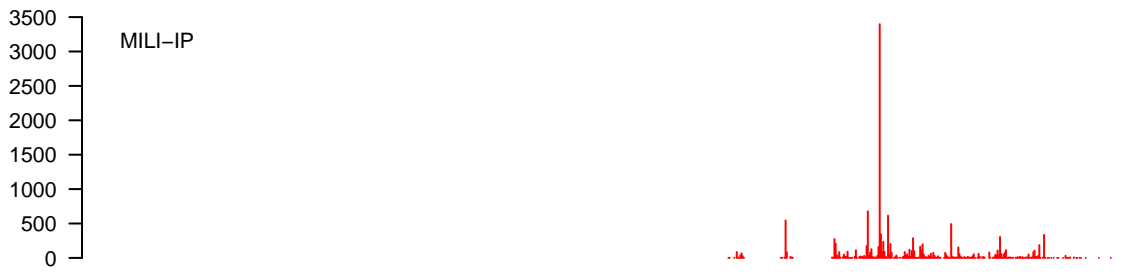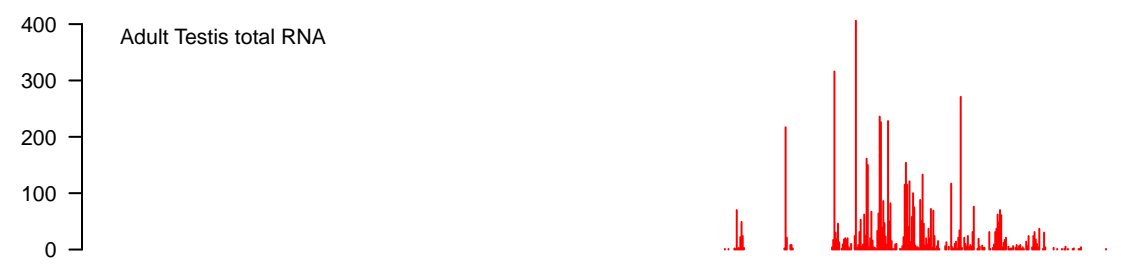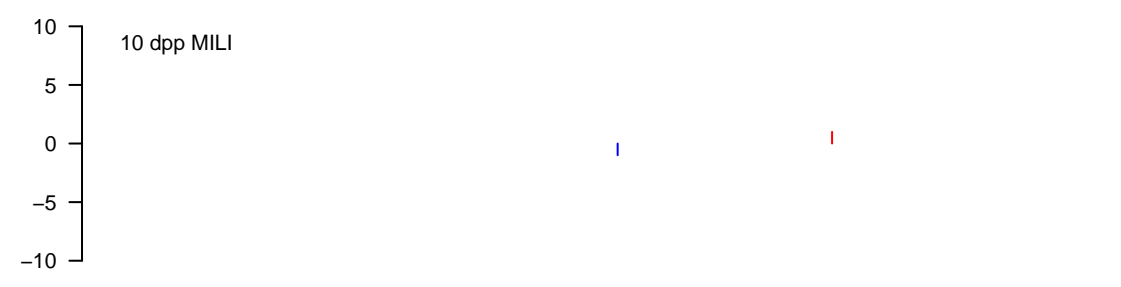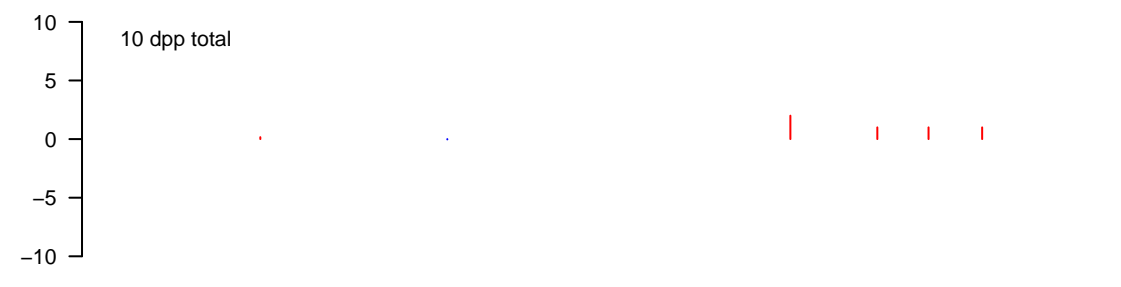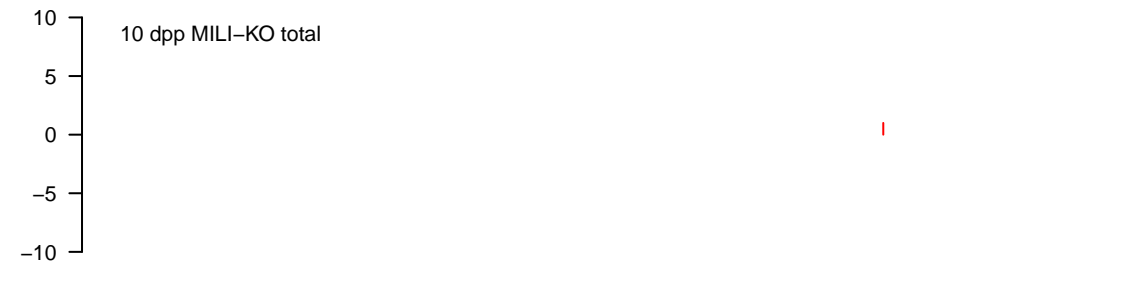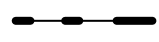

NR\_026924 chr1 93301458 93302606 – 1700020N18Rik

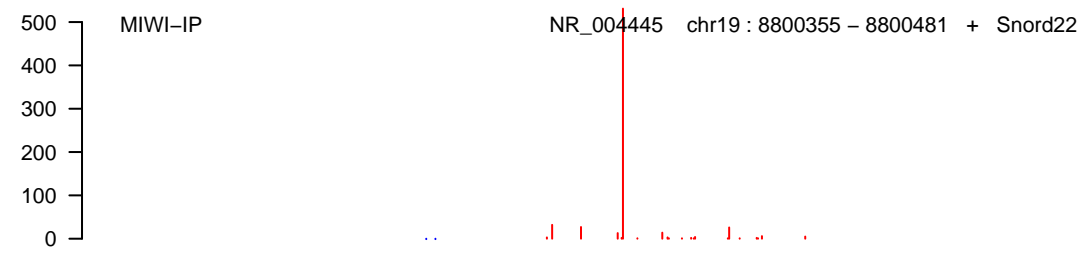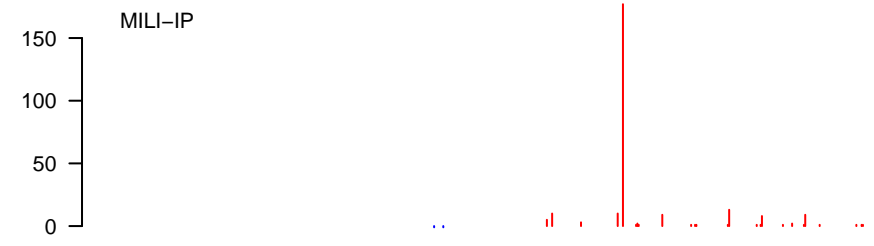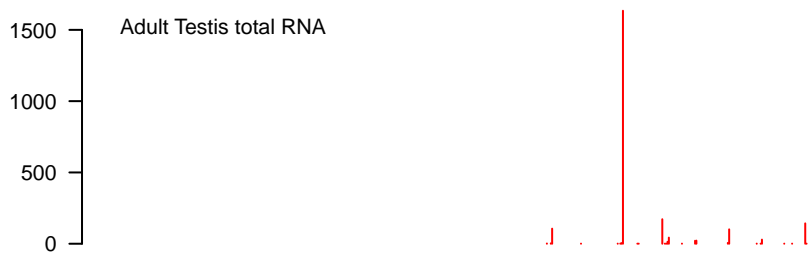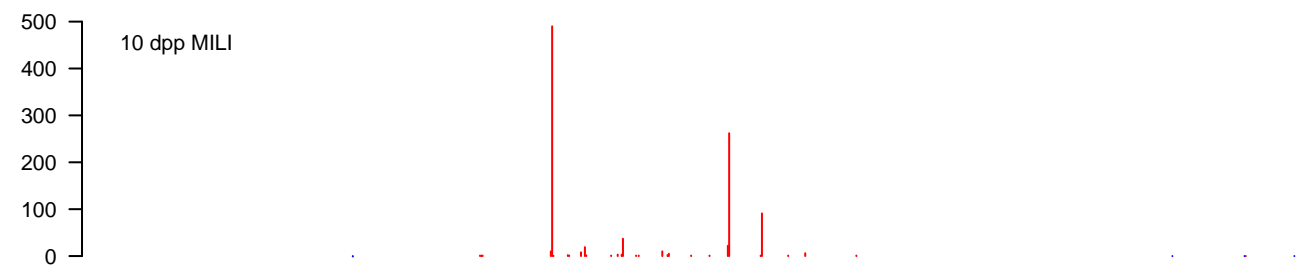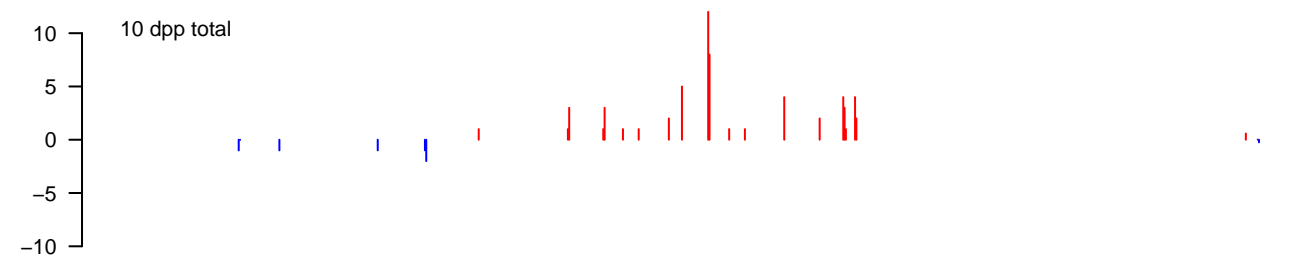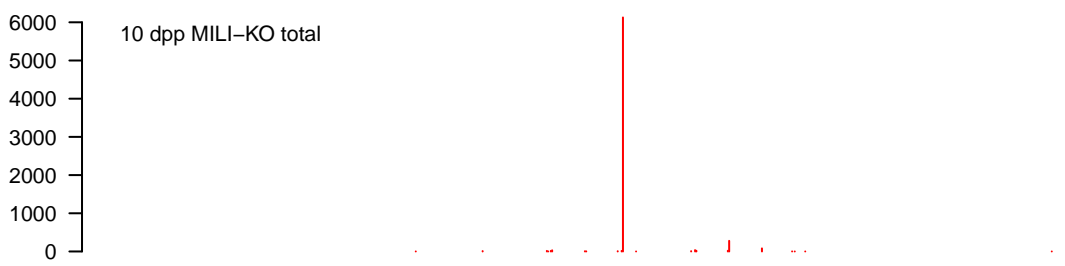

NR\_004445 chr19 8800355 8800481 + Snord22

NR\_002896 chr19:8797976 - 8800816 + Snhg1

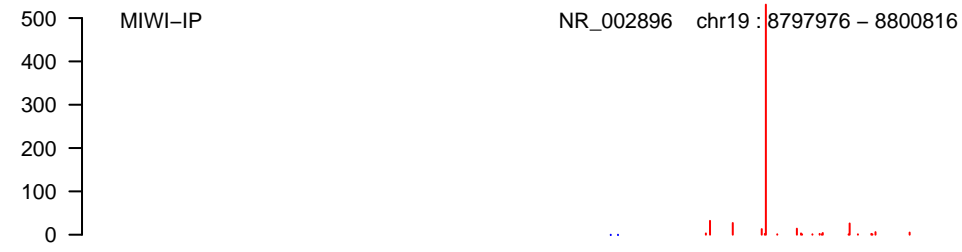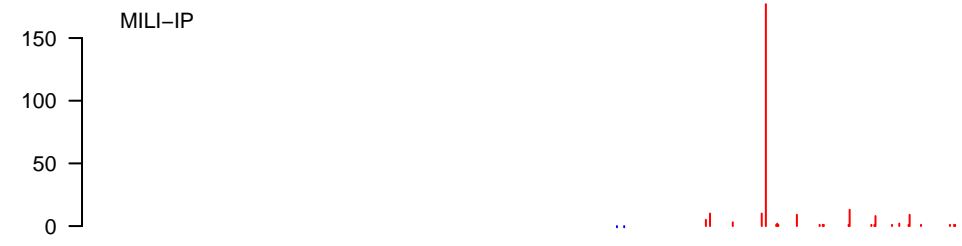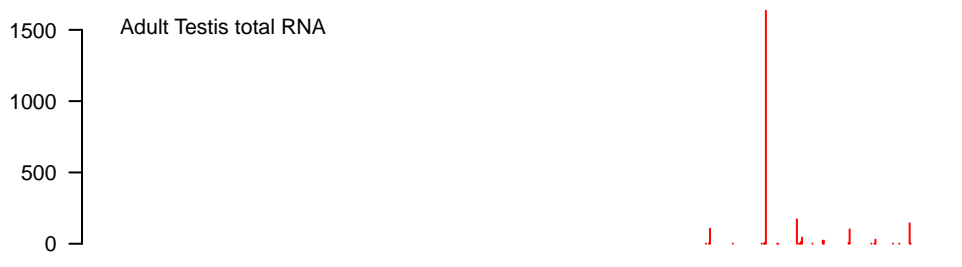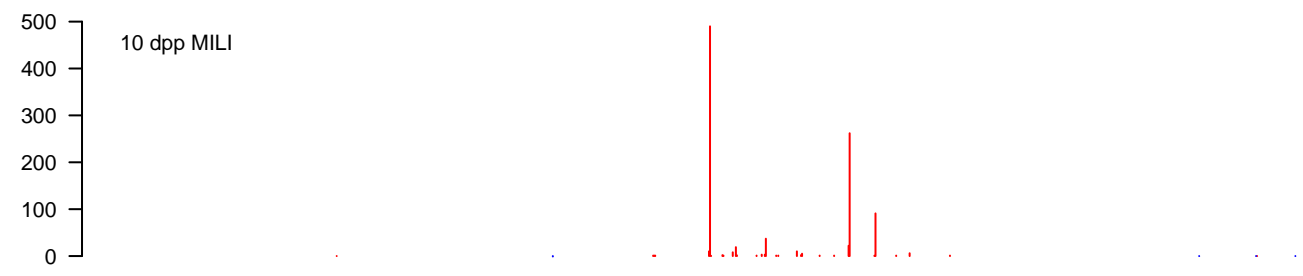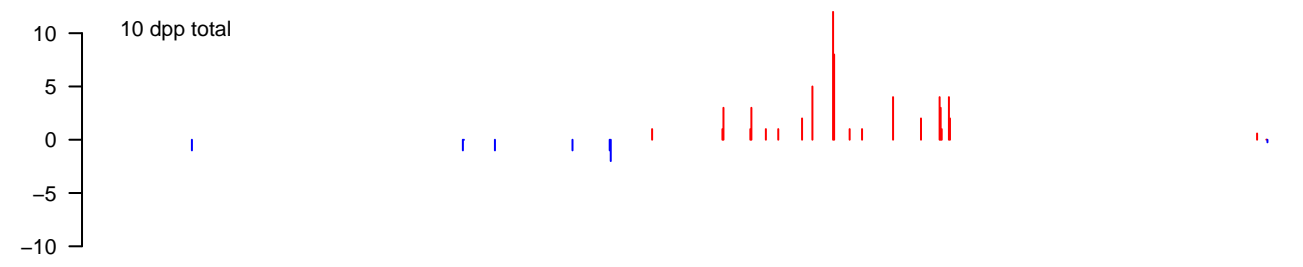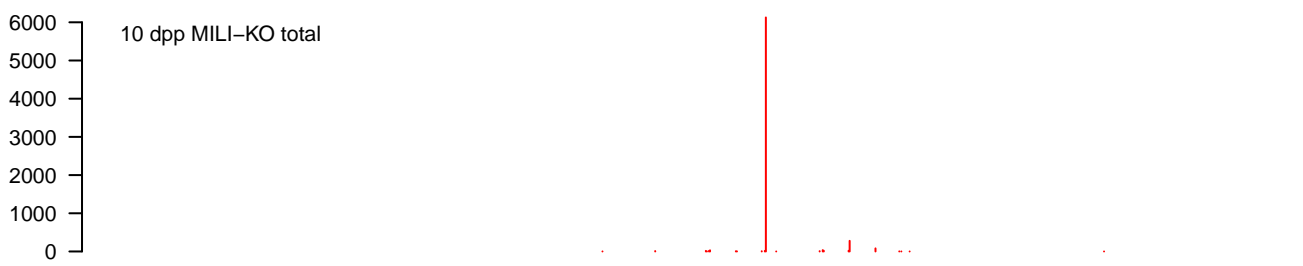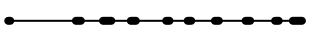

NR\_002896 chr19 8797976 8800816 + Snhg1

NR\_026798 chr13:21596184 - 21598393 - Zfp389

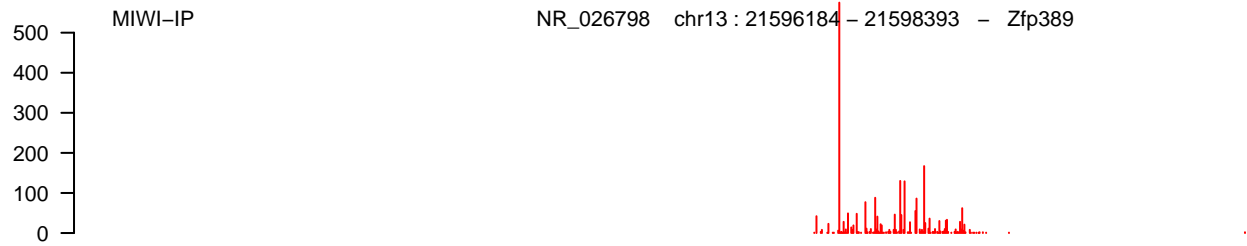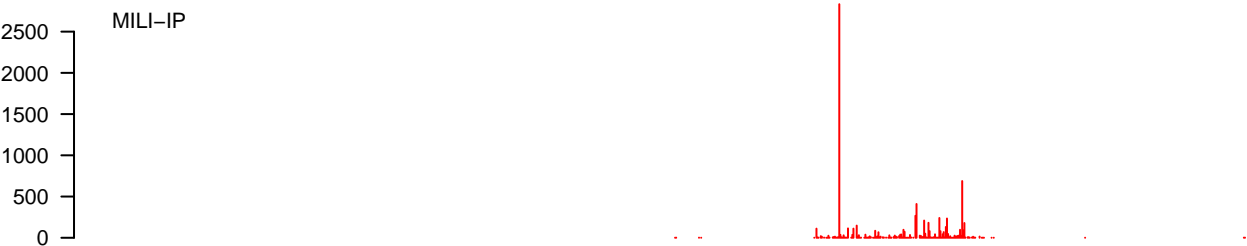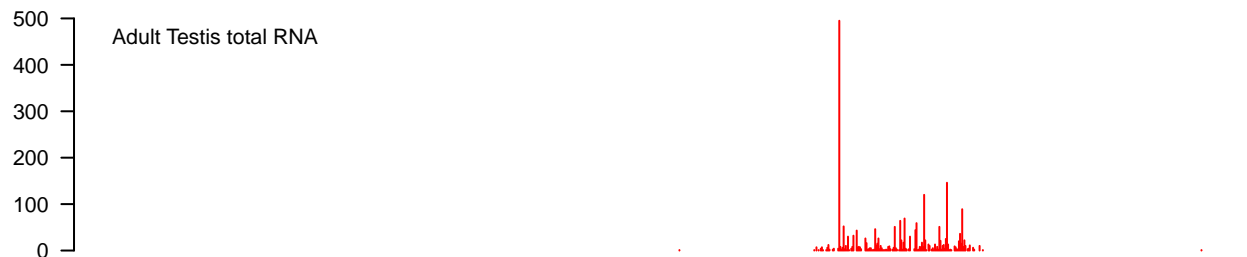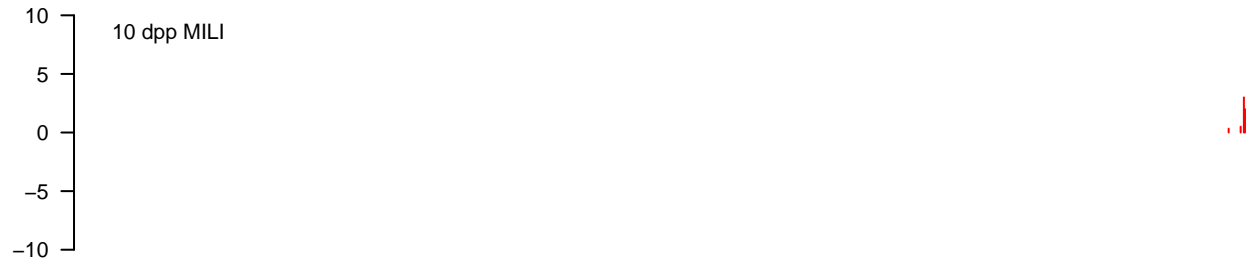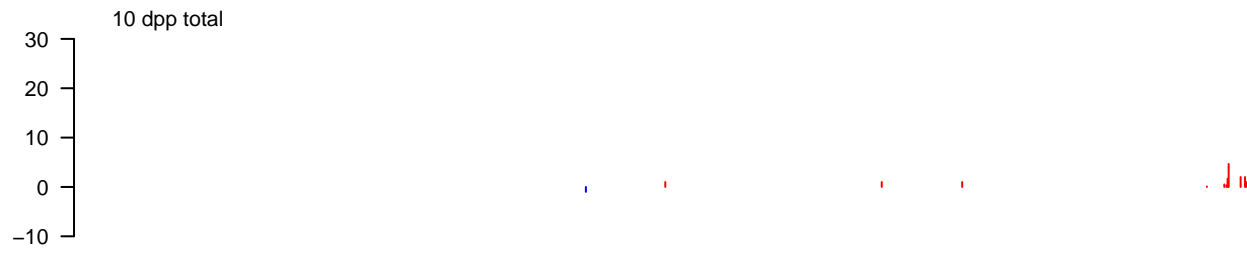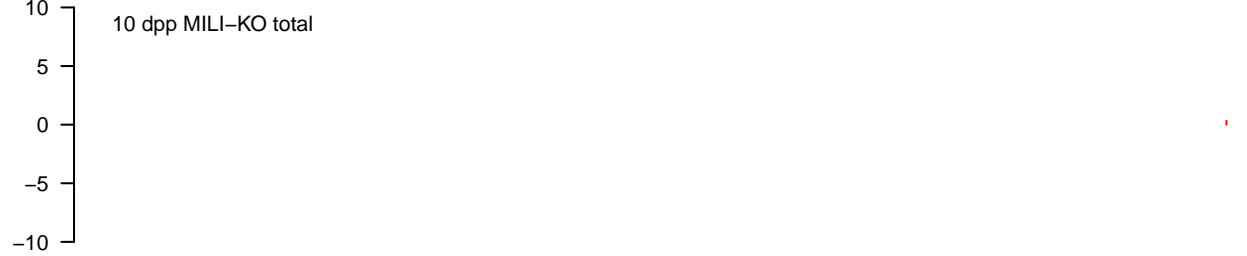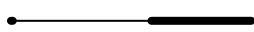

NR\_026798 chr13 21596184 21598393 - Zfp389

NR\_002840 chr1 : 162965296 - 162968668 + Gas5

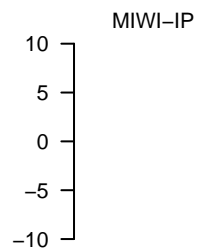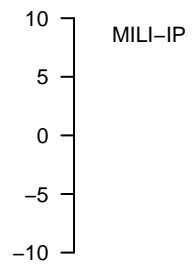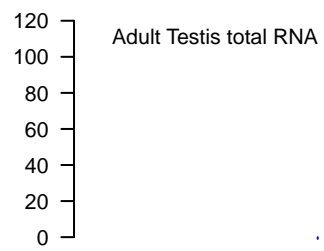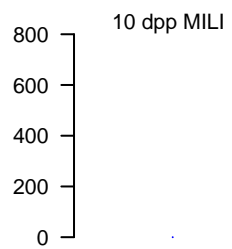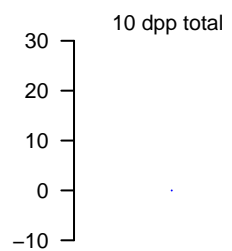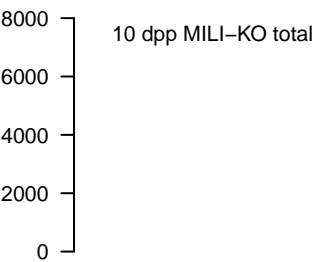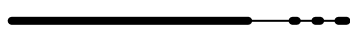

NR\_002840 chr1 162965296 162968668 + Gas5

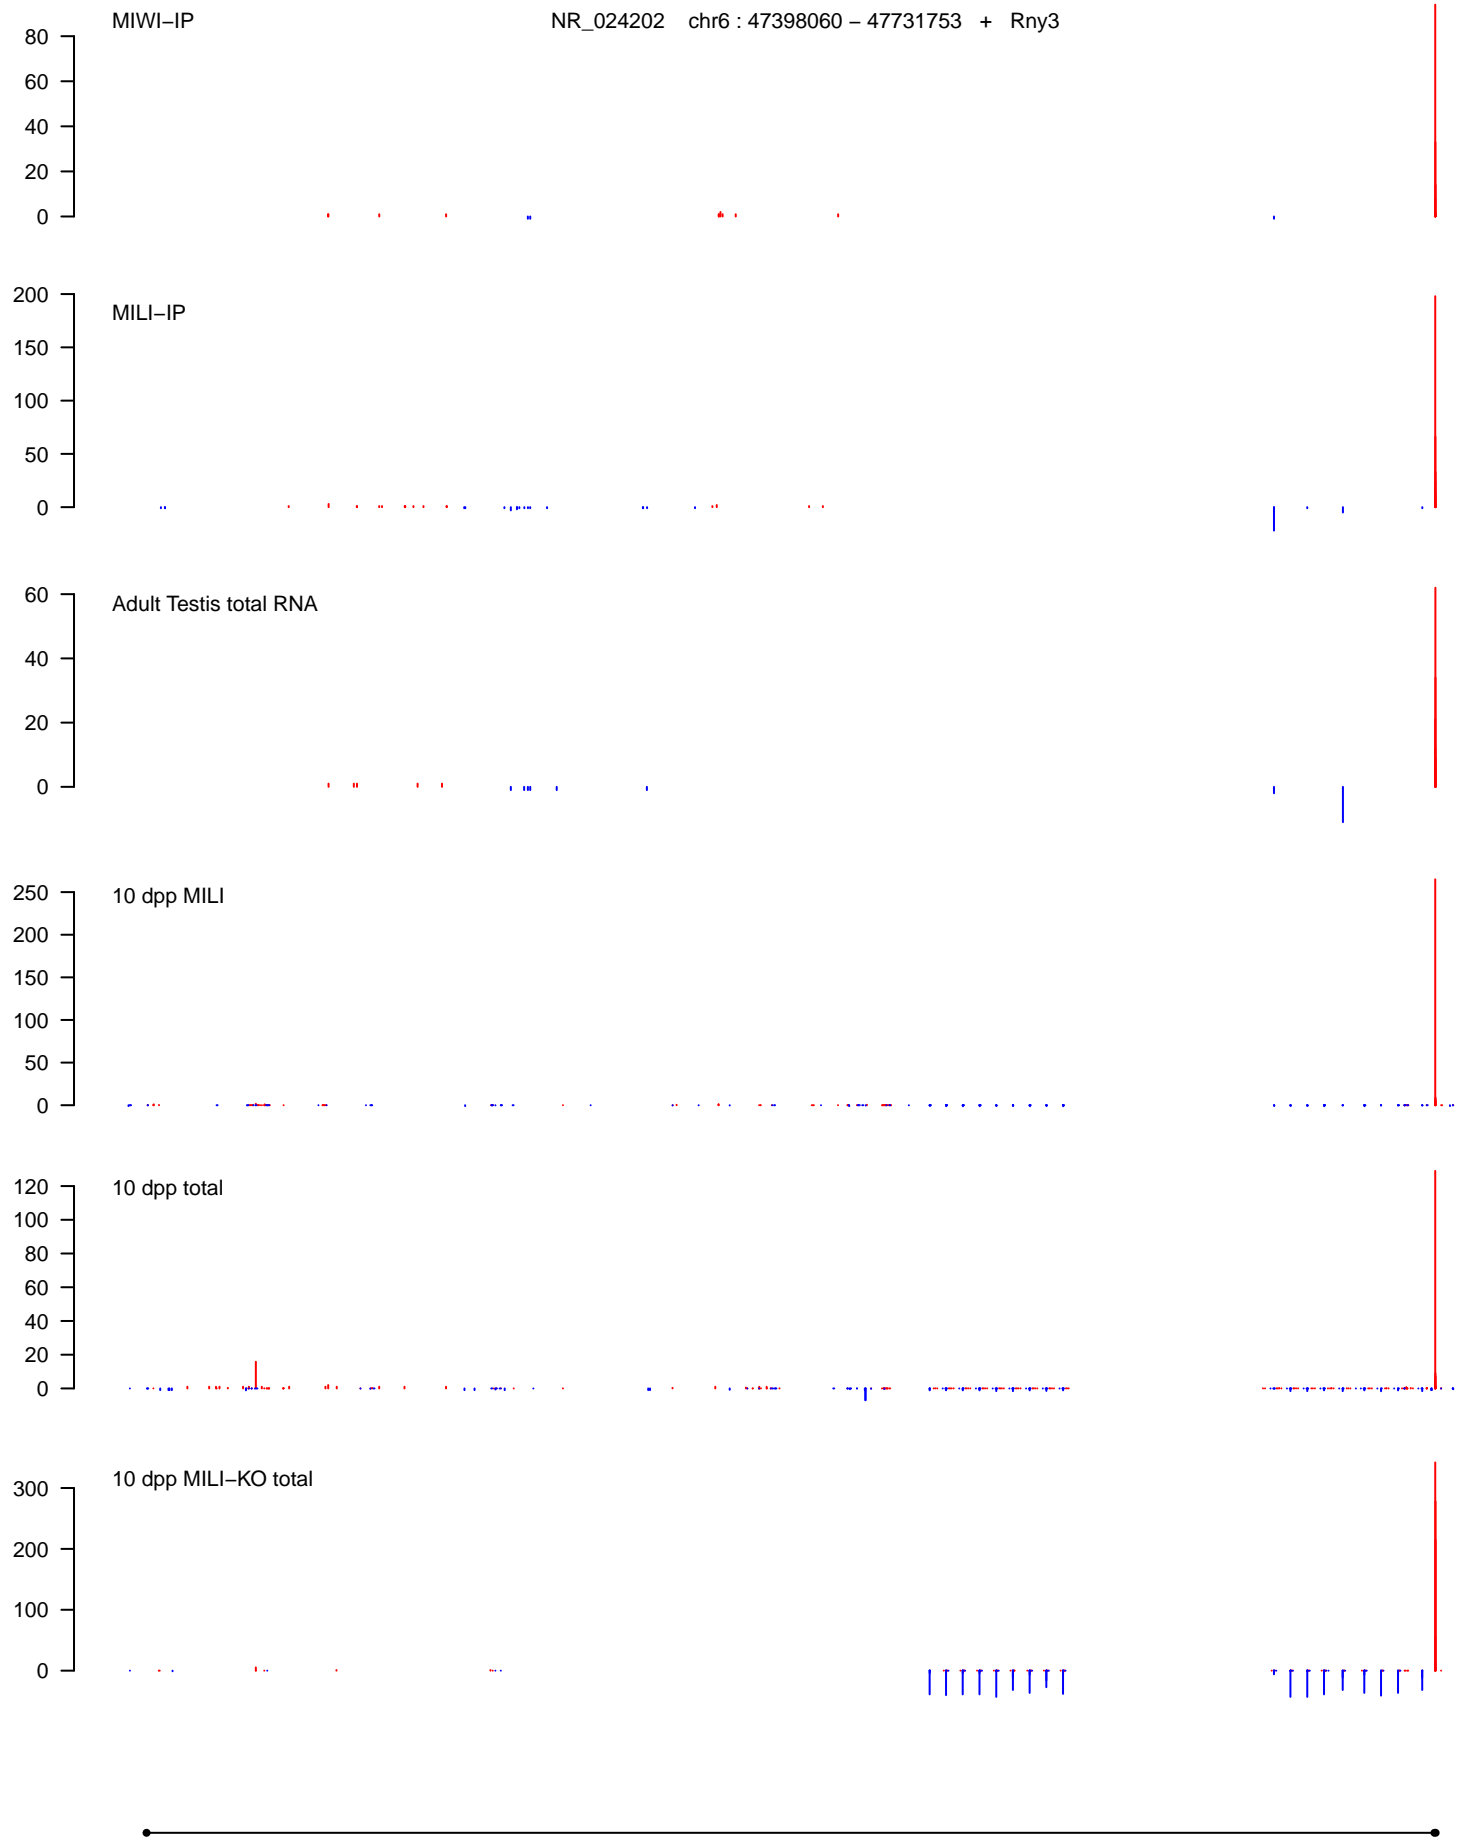



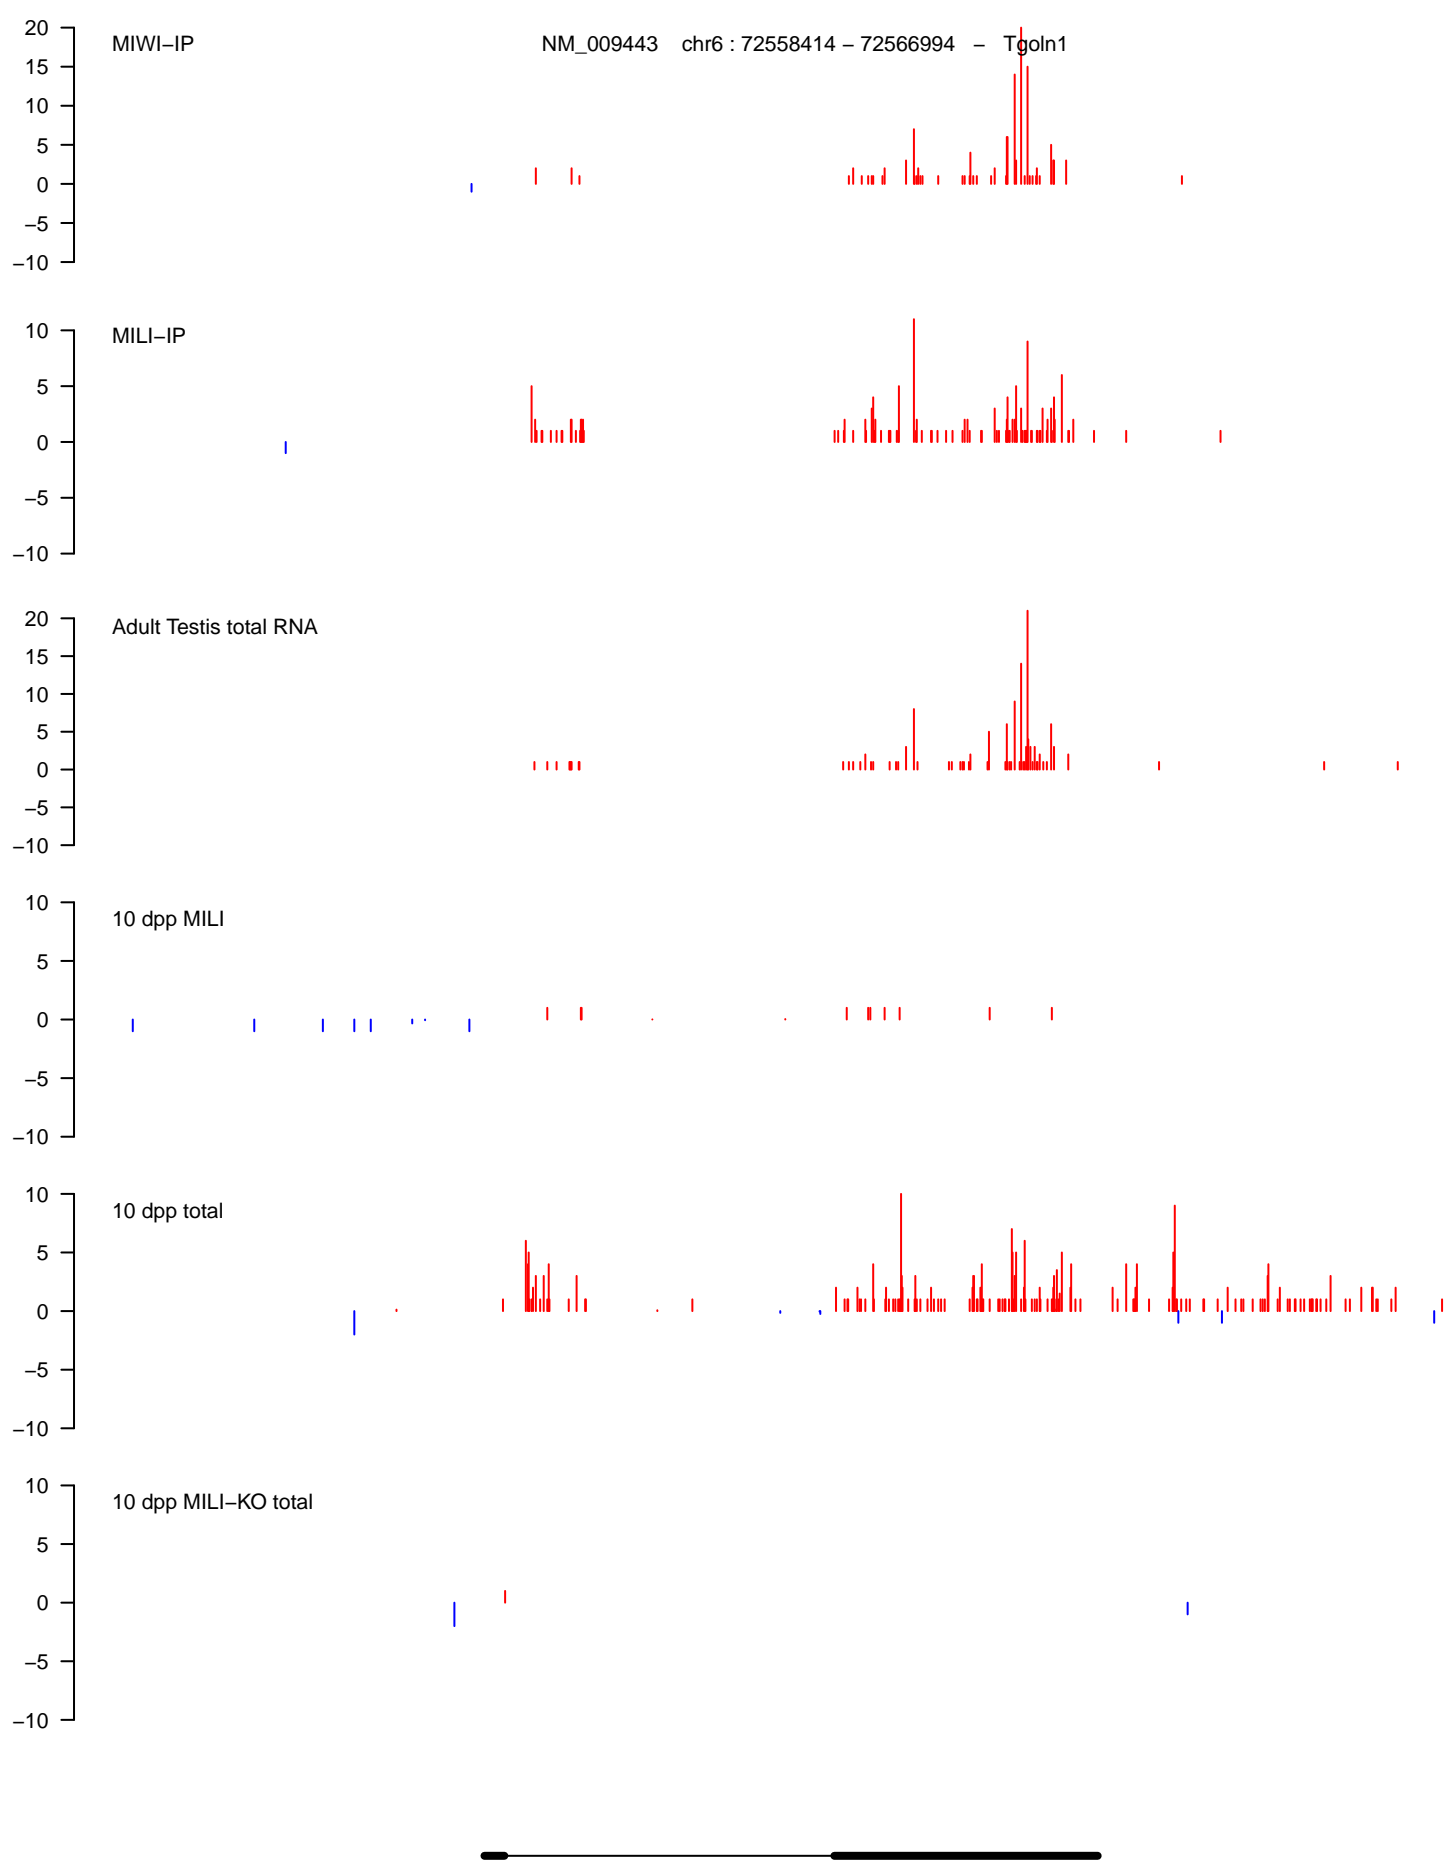

NM\_009443 chr6 72558414 72566994 - Tgolin1

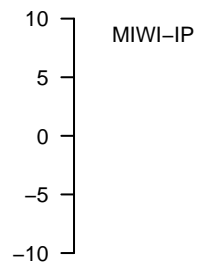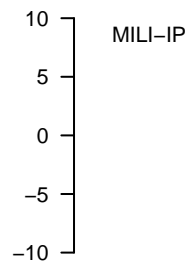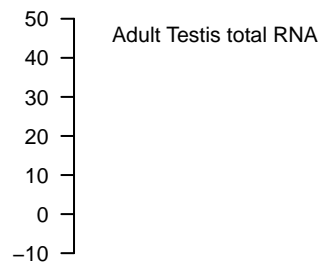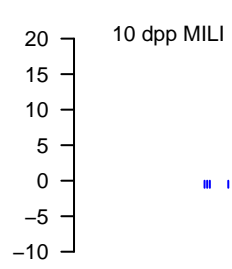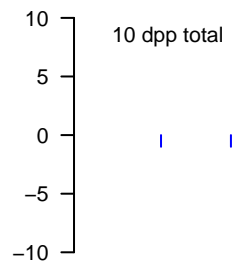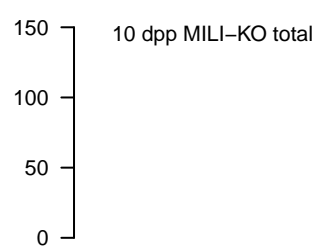

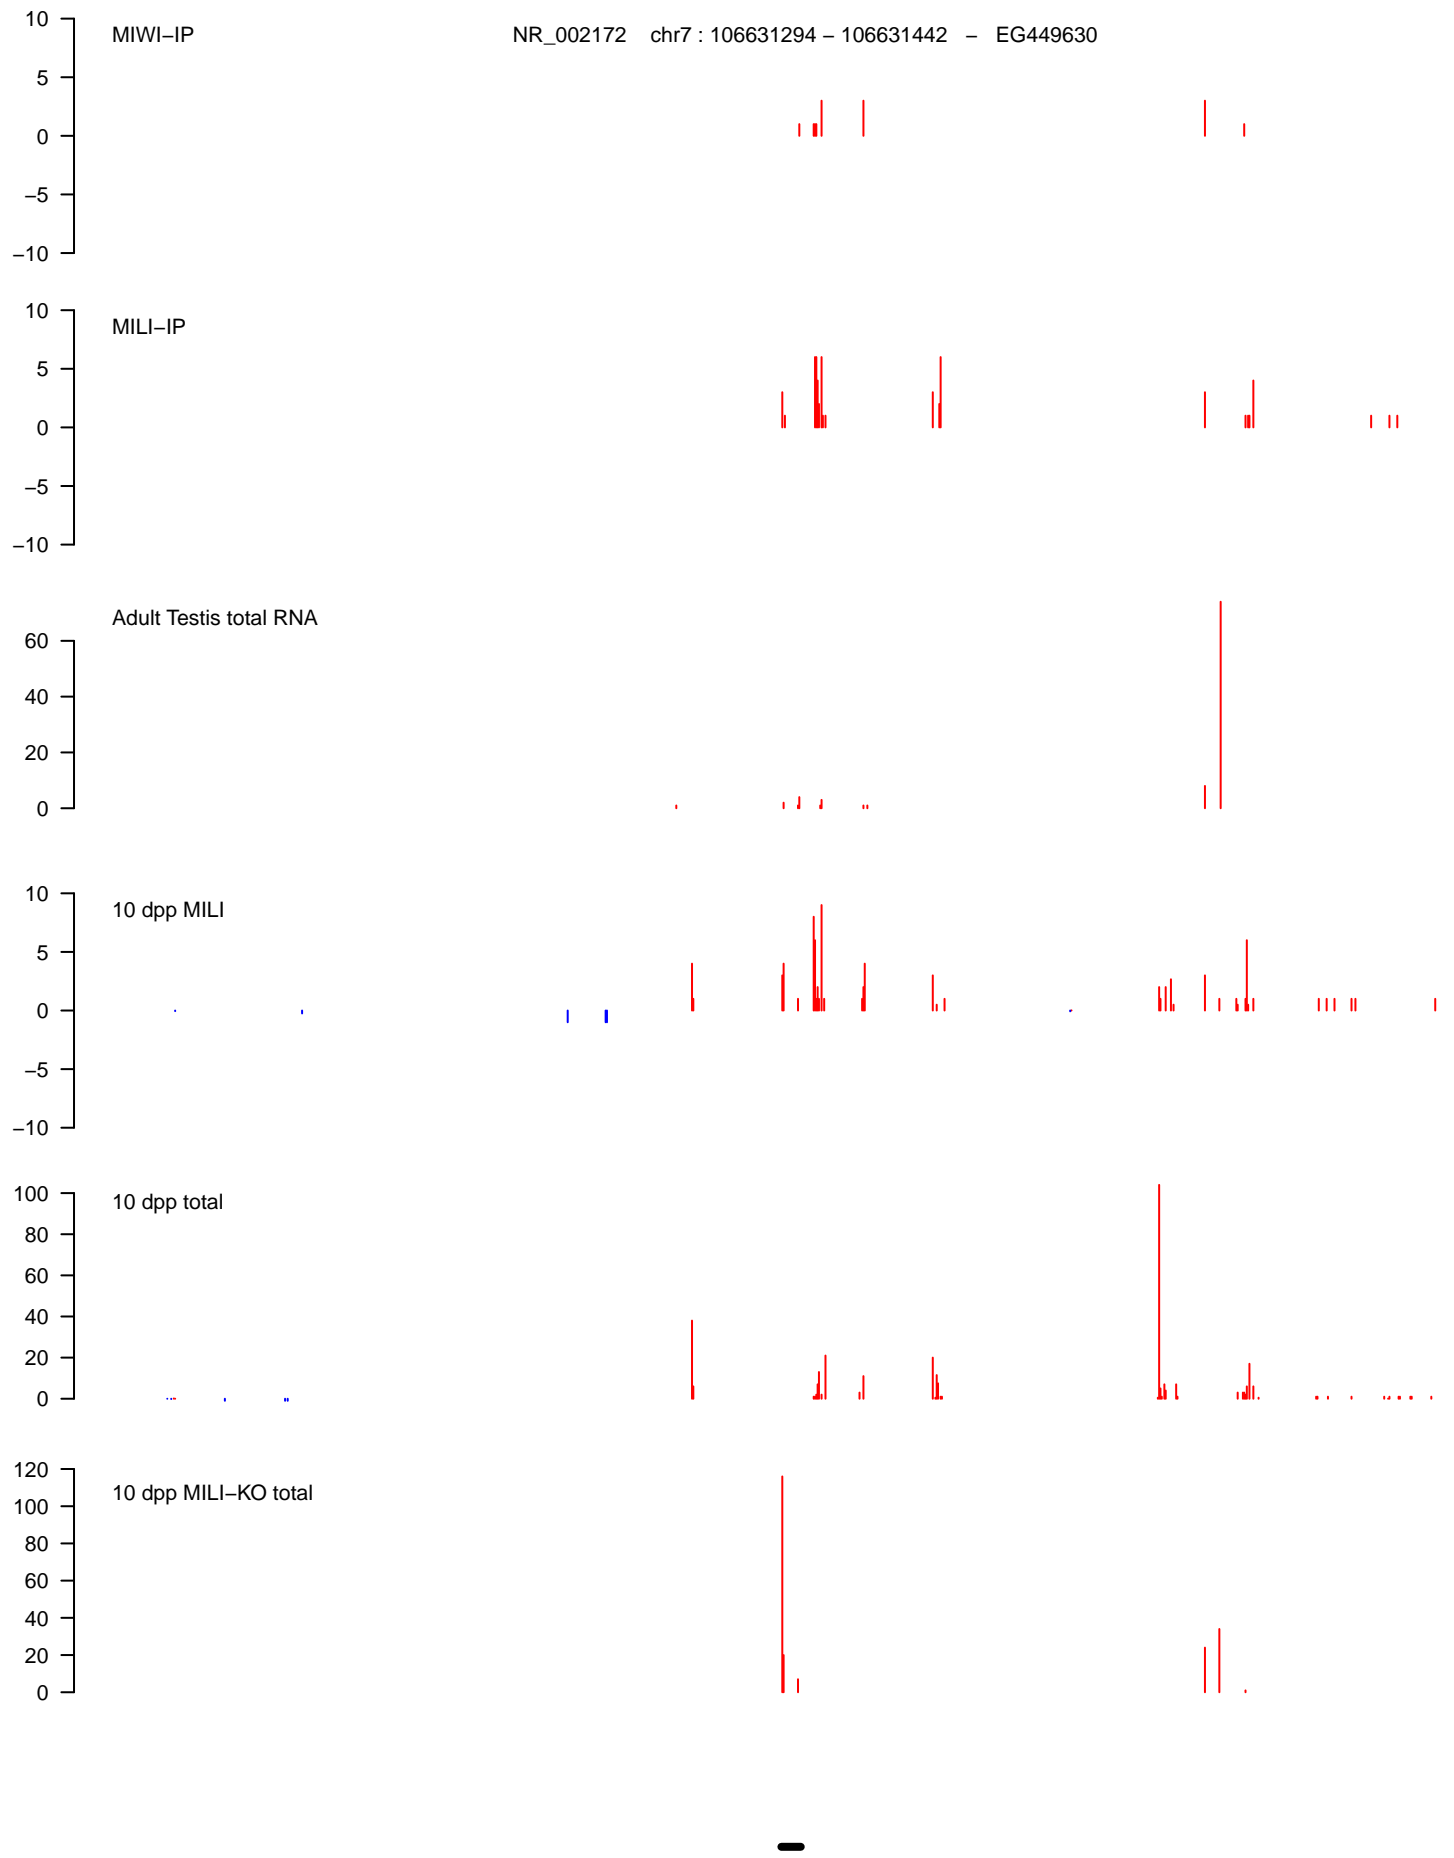

NM\_153484 chr15 : 81633246 - 81657290 + Tef

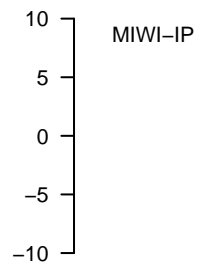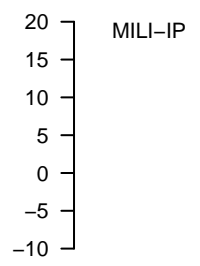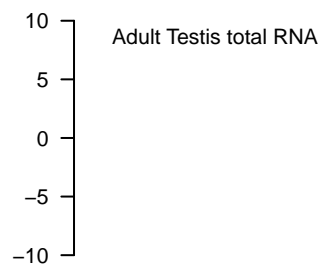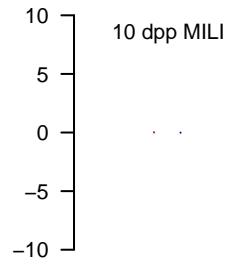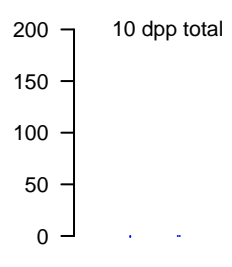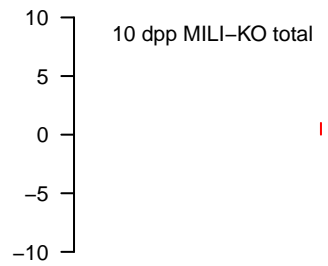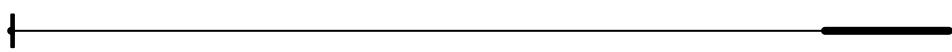

NM\_153484 chr15 81633246 81657290 + Tef

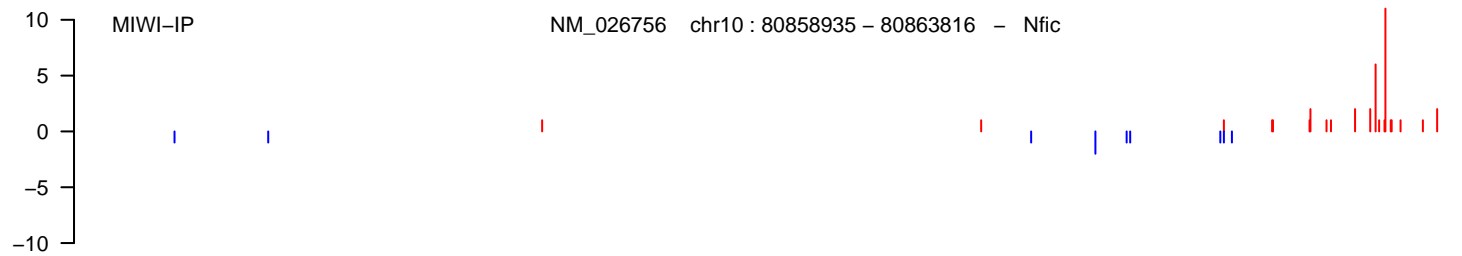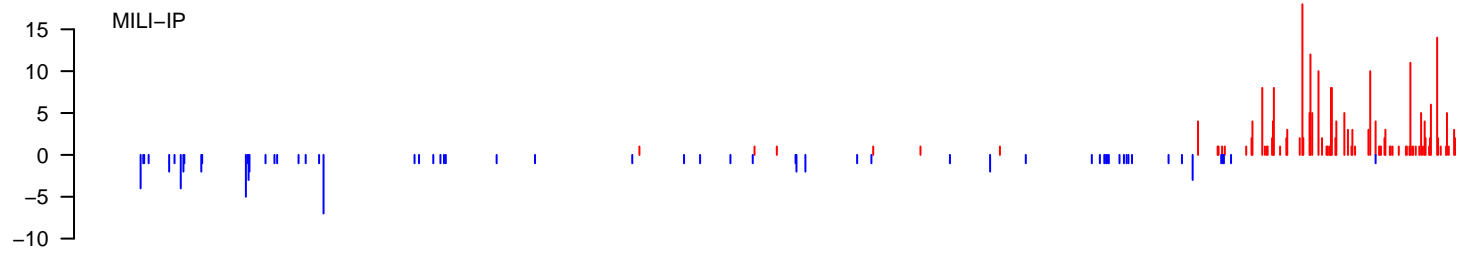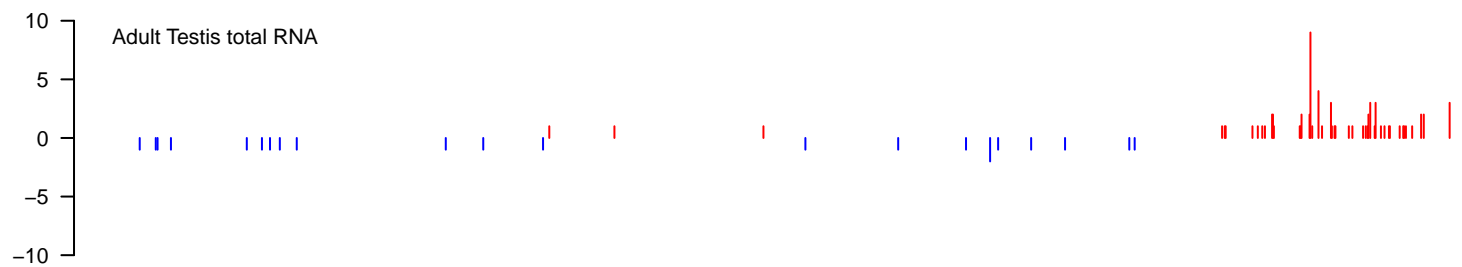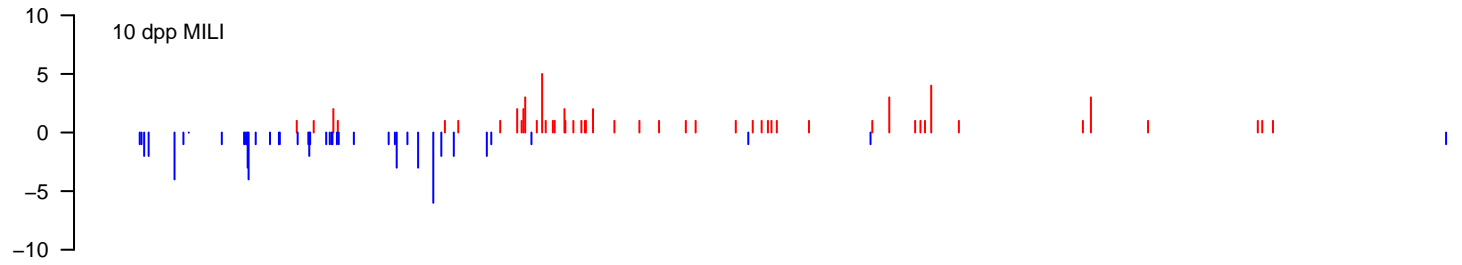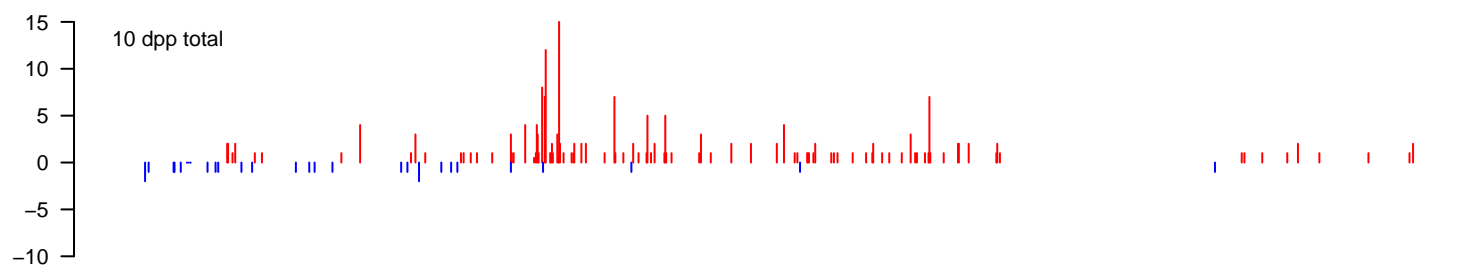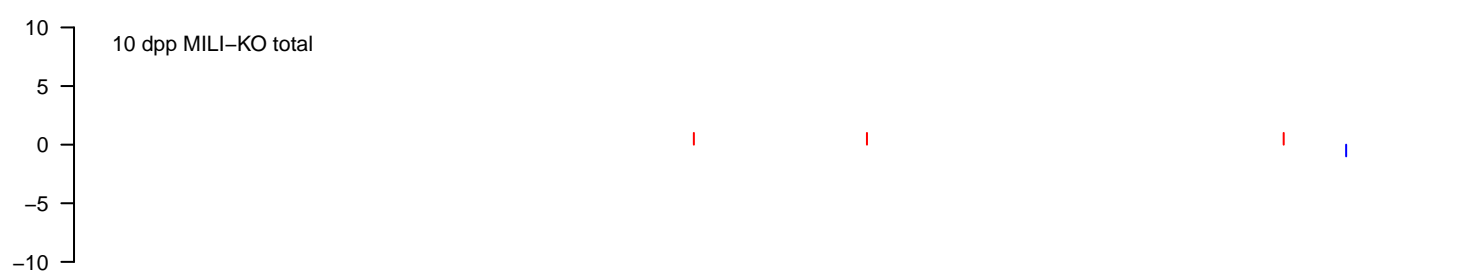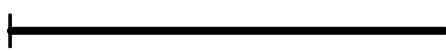

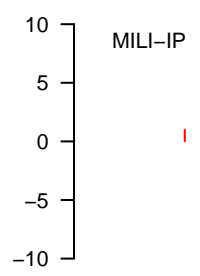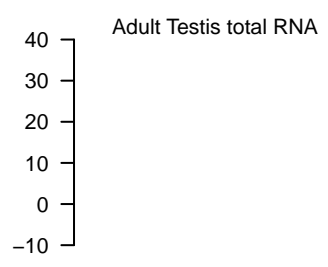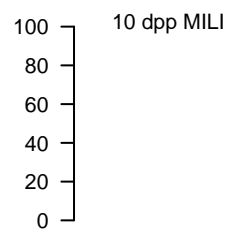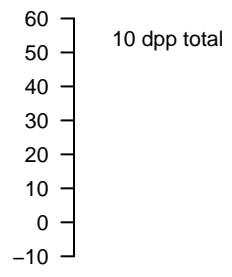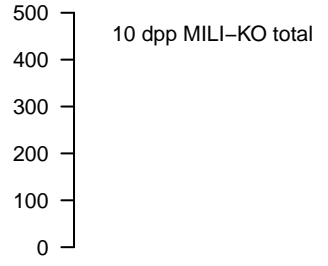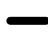

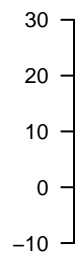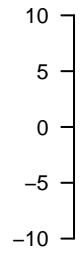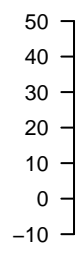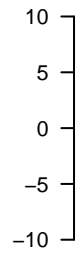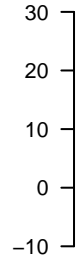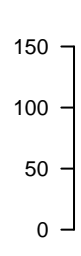

NR\_024067 chr1 : 9932105 - 9934199 - Snhg6



MIWI-IP



MILI-IP



Adult Testis total RNA



10 dpp MILI



10 dpp total



10 dpp MILI-KO total

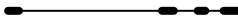

NR\_024067 chr1 9932105 9934199 - Snhg6



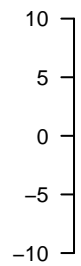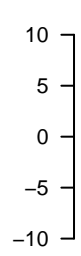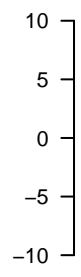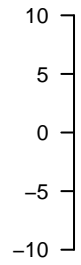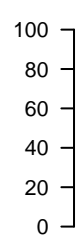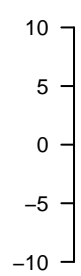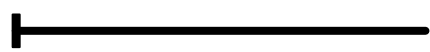





MIWI-IP

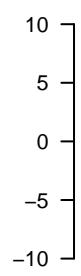

MILI-IP



Adult Testis total RNA

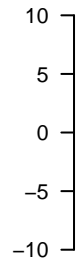

10 dpp MILI

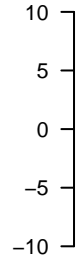

10 dpp total

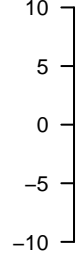

10 dpp MILI-KO total

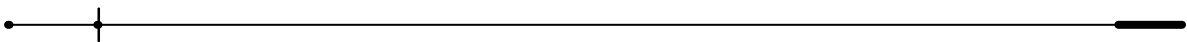

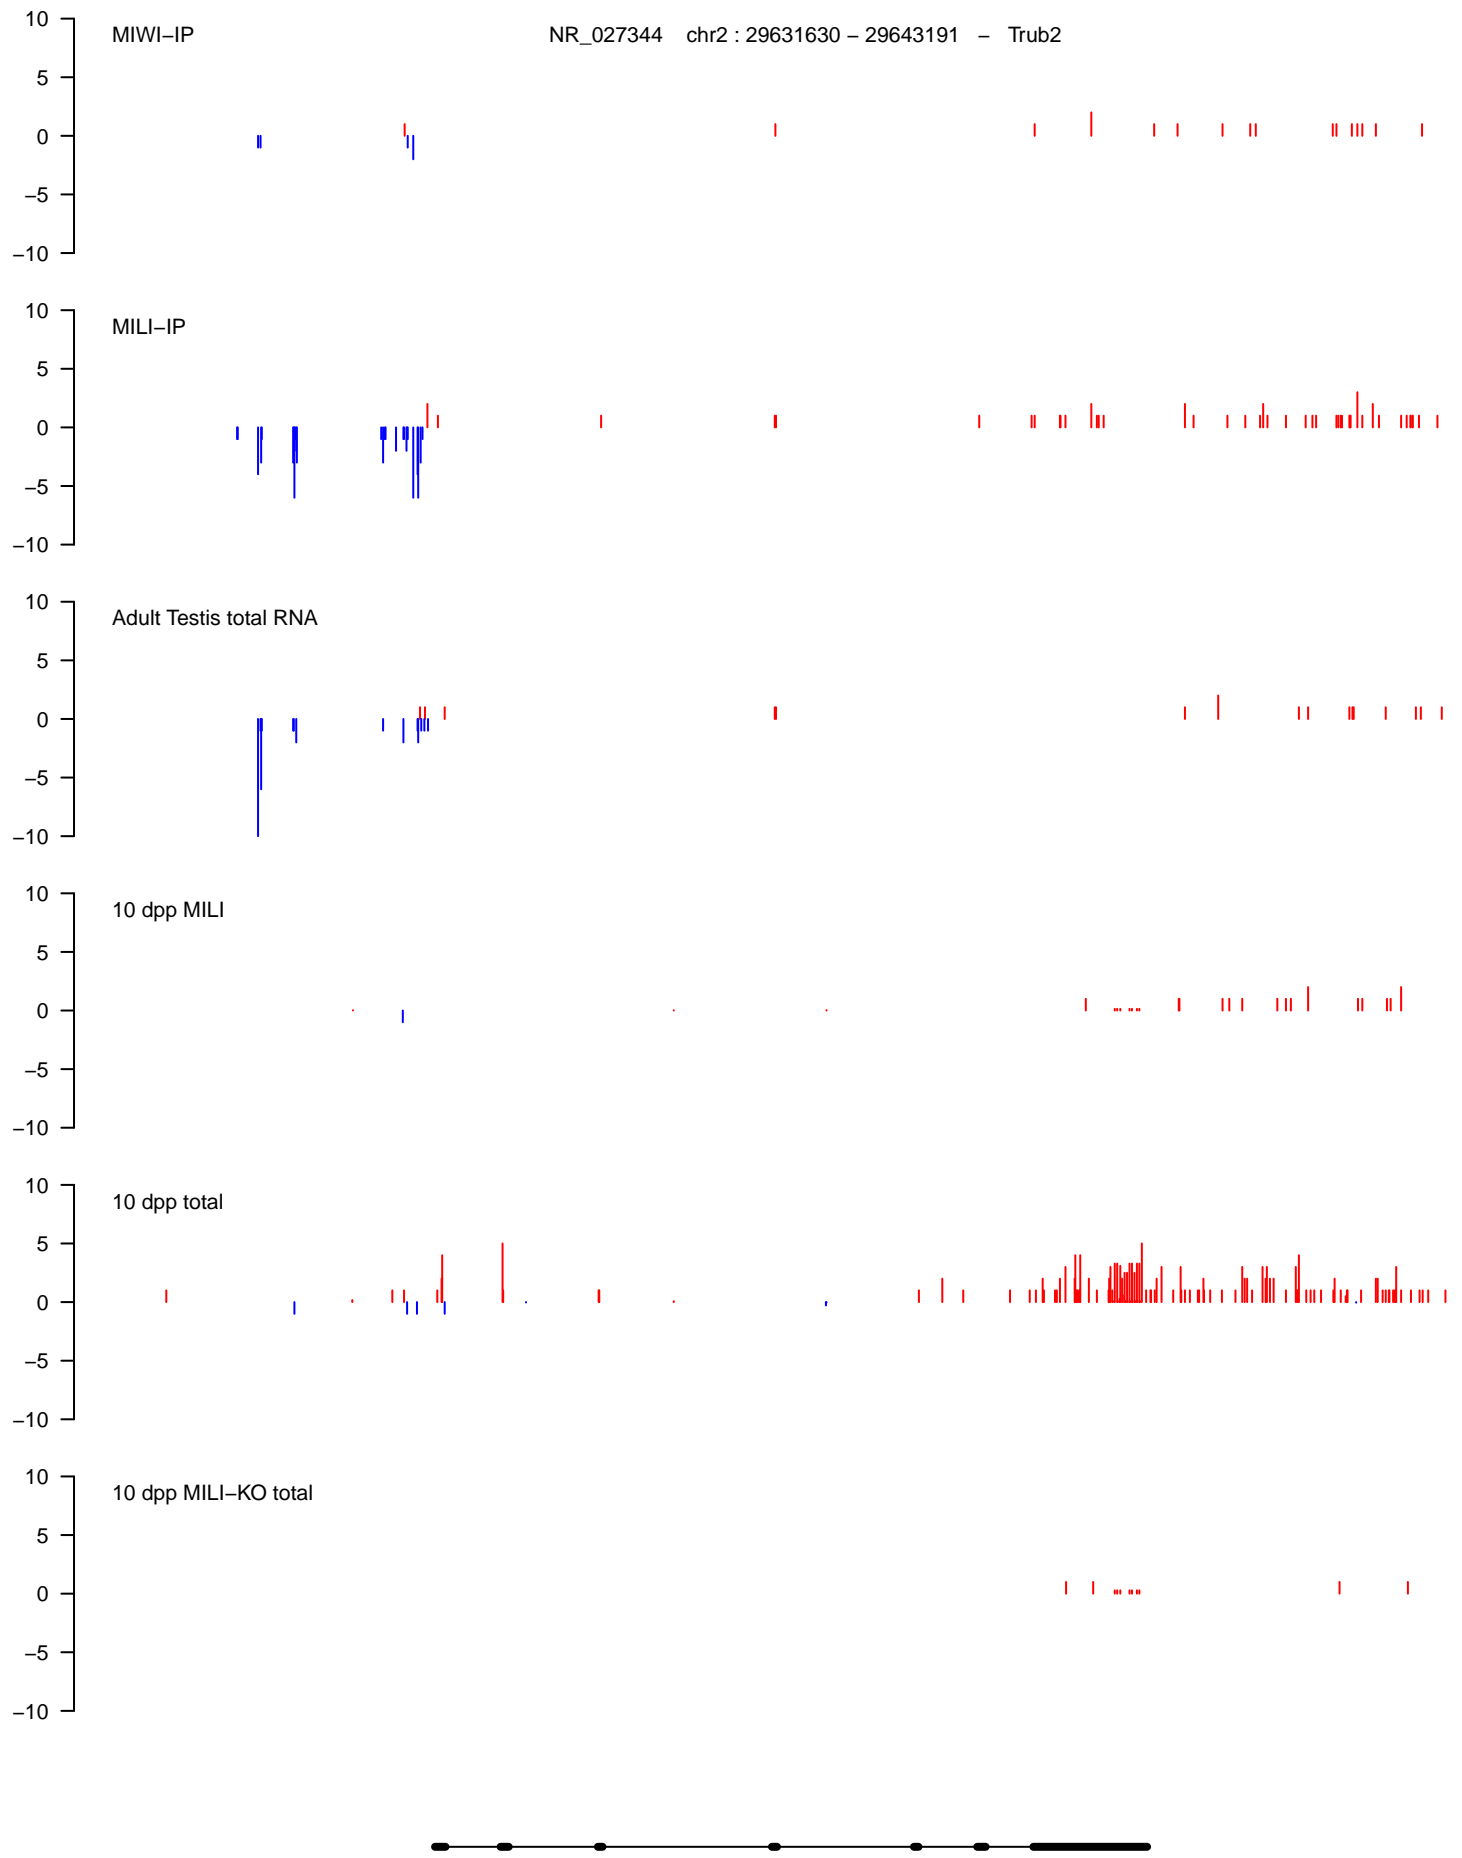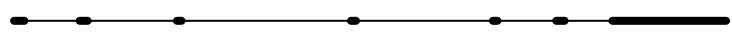

NR\_027357 chr3 : 88214419 – 88229061 – Slc25a44

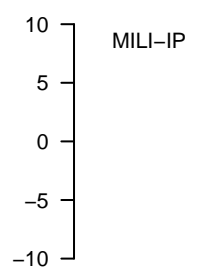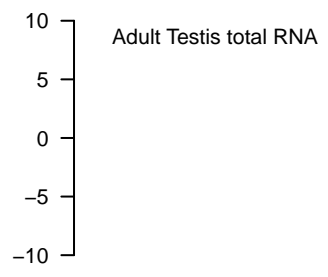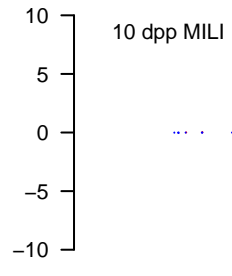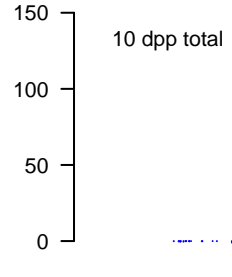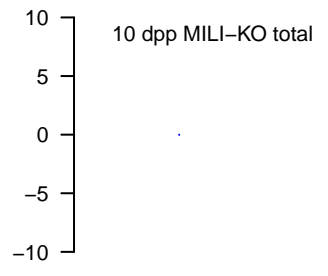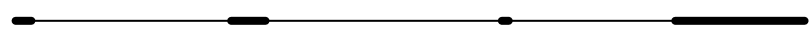

NR\_027357 chr3 88214419 88229061 – Slc25a44

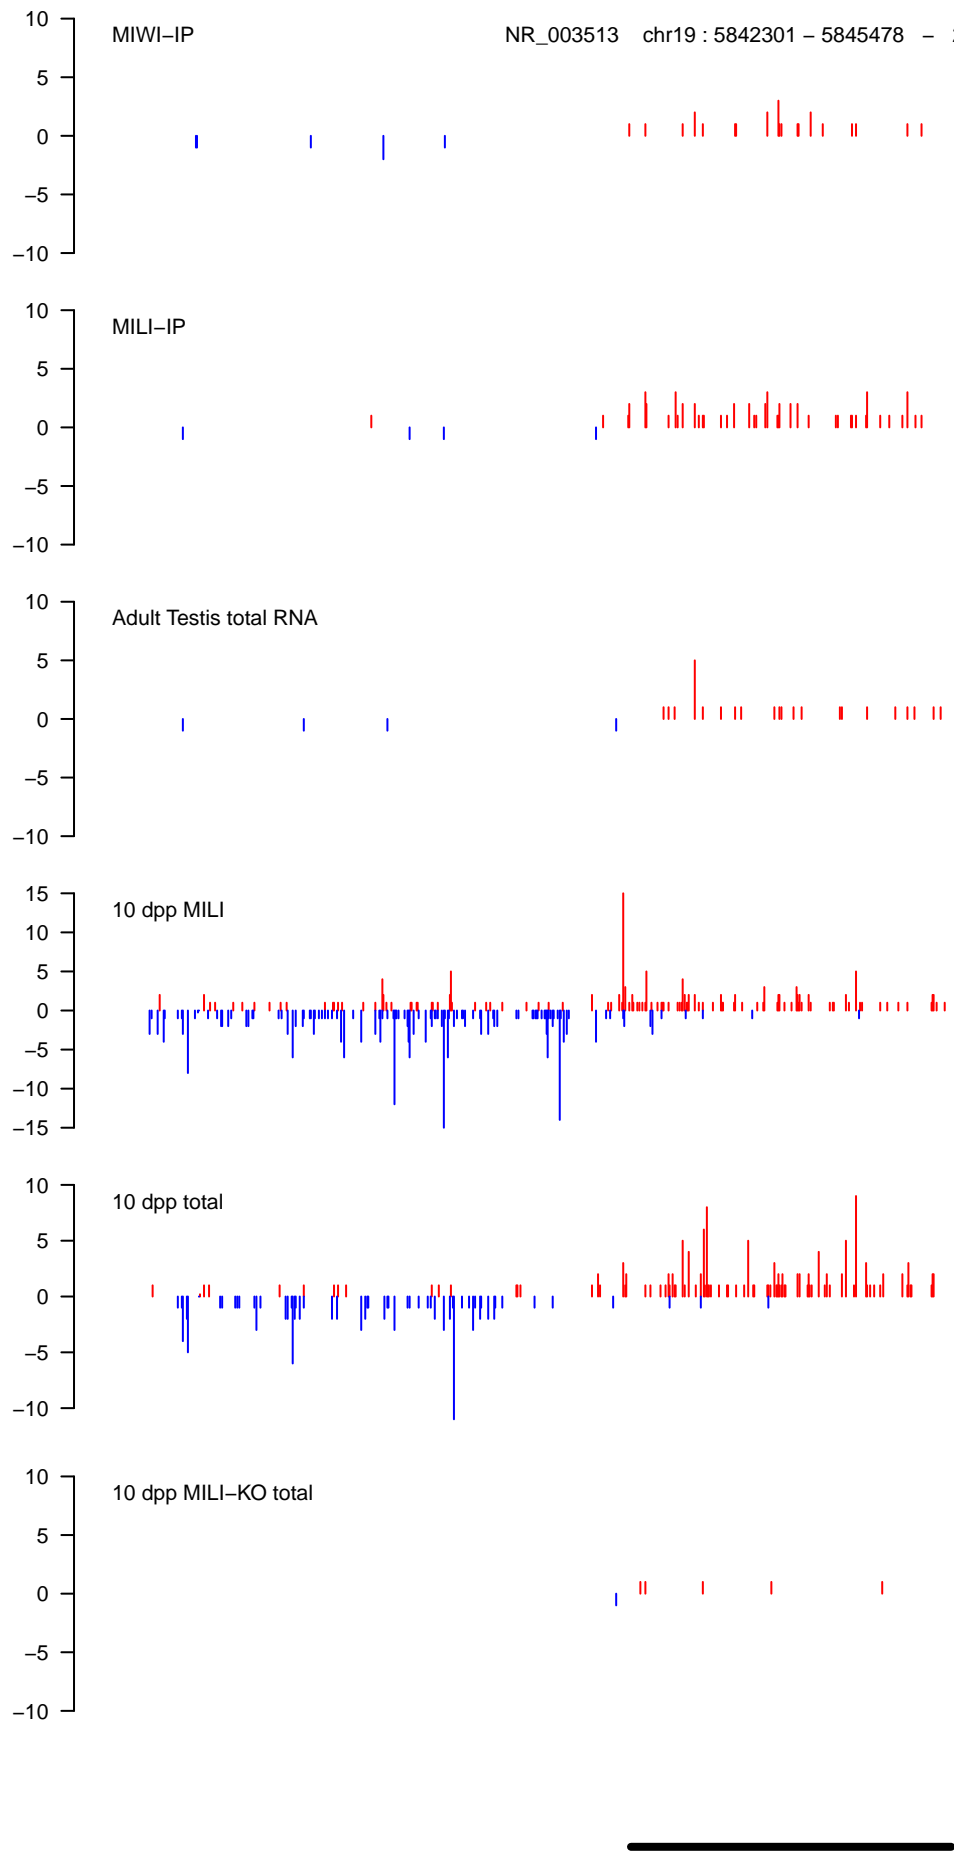

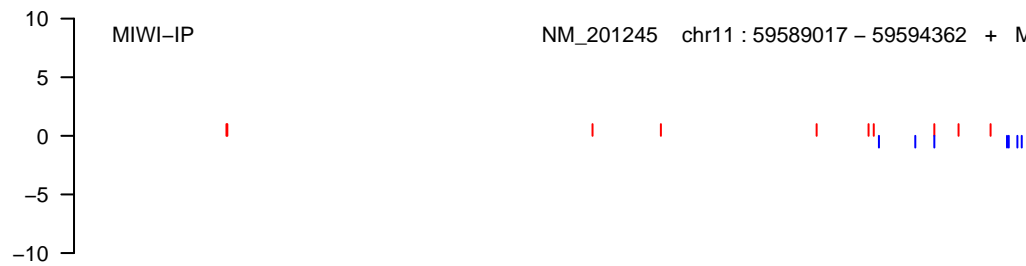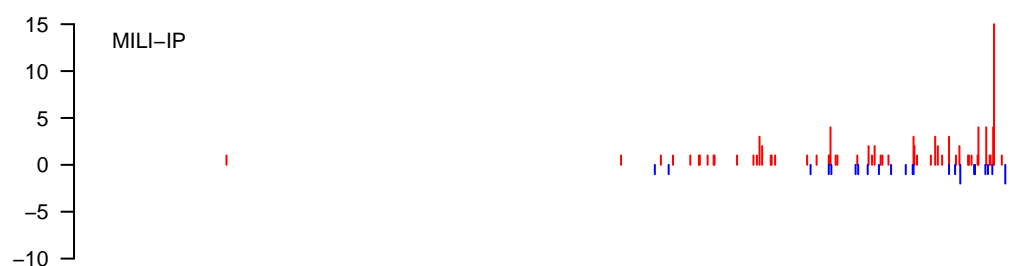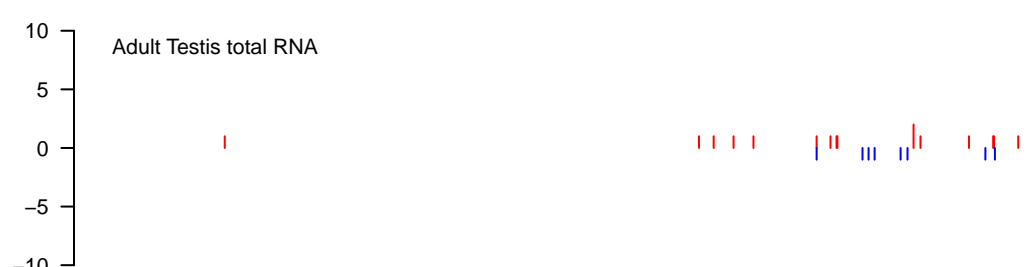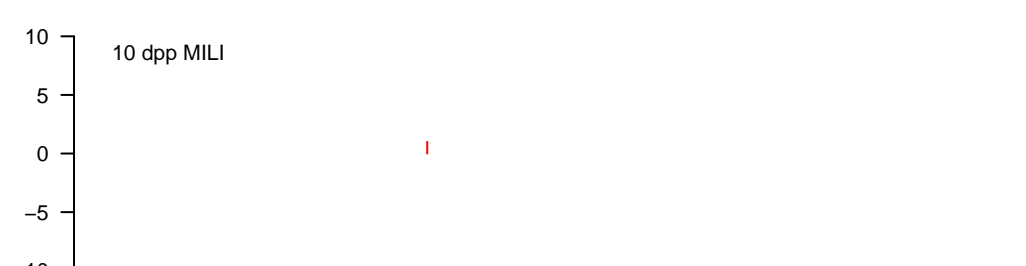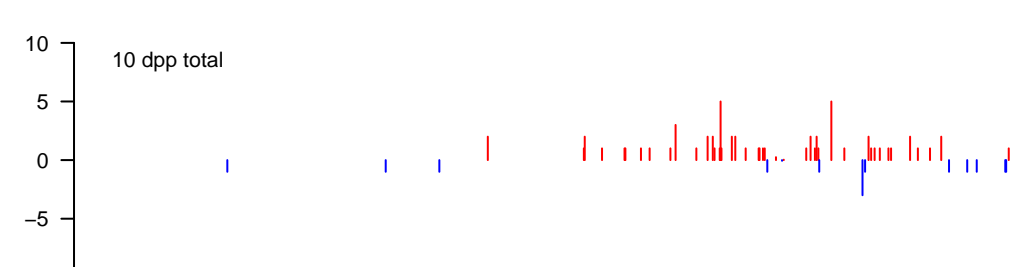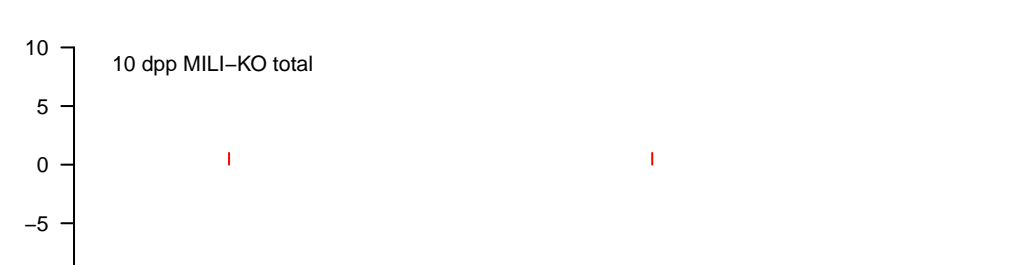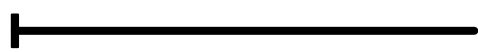

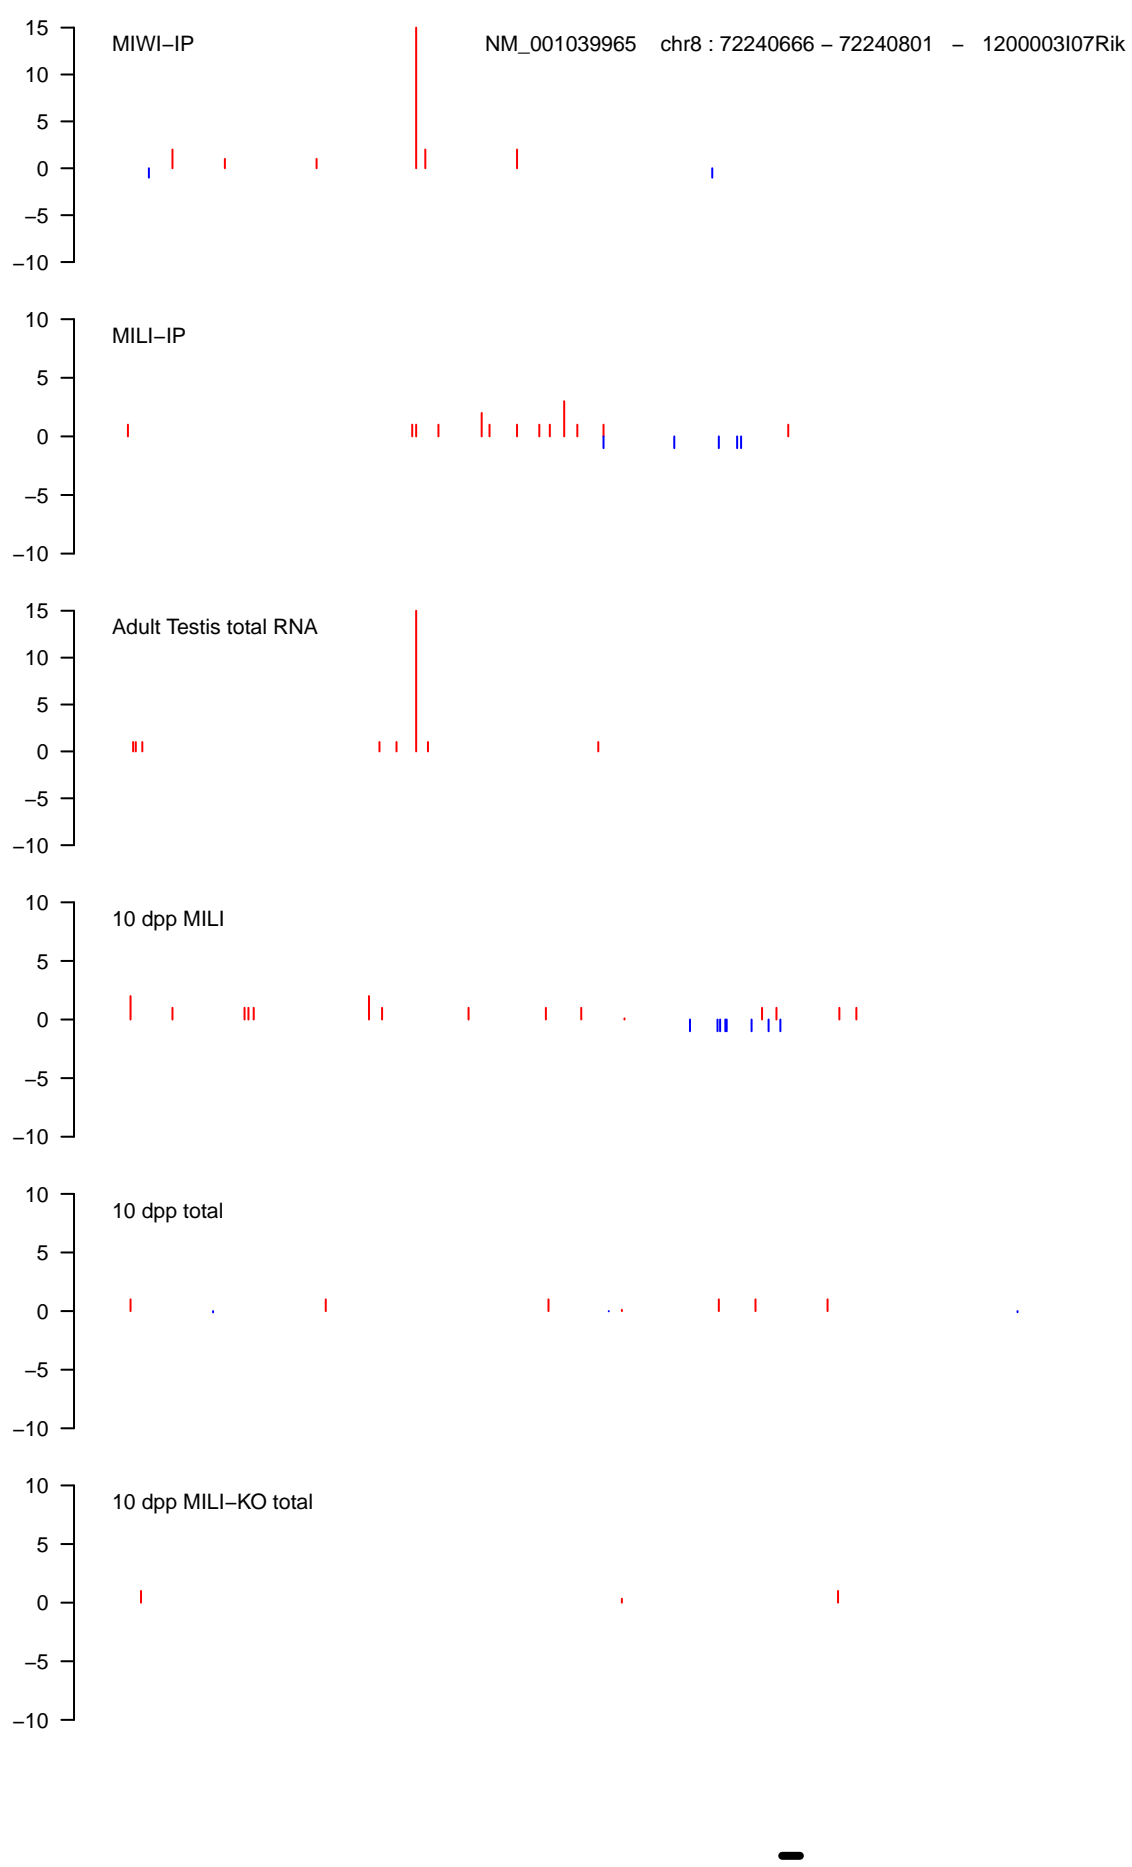

NM\_001039965 chr8 72240666 72240801 – 1200003107Rik



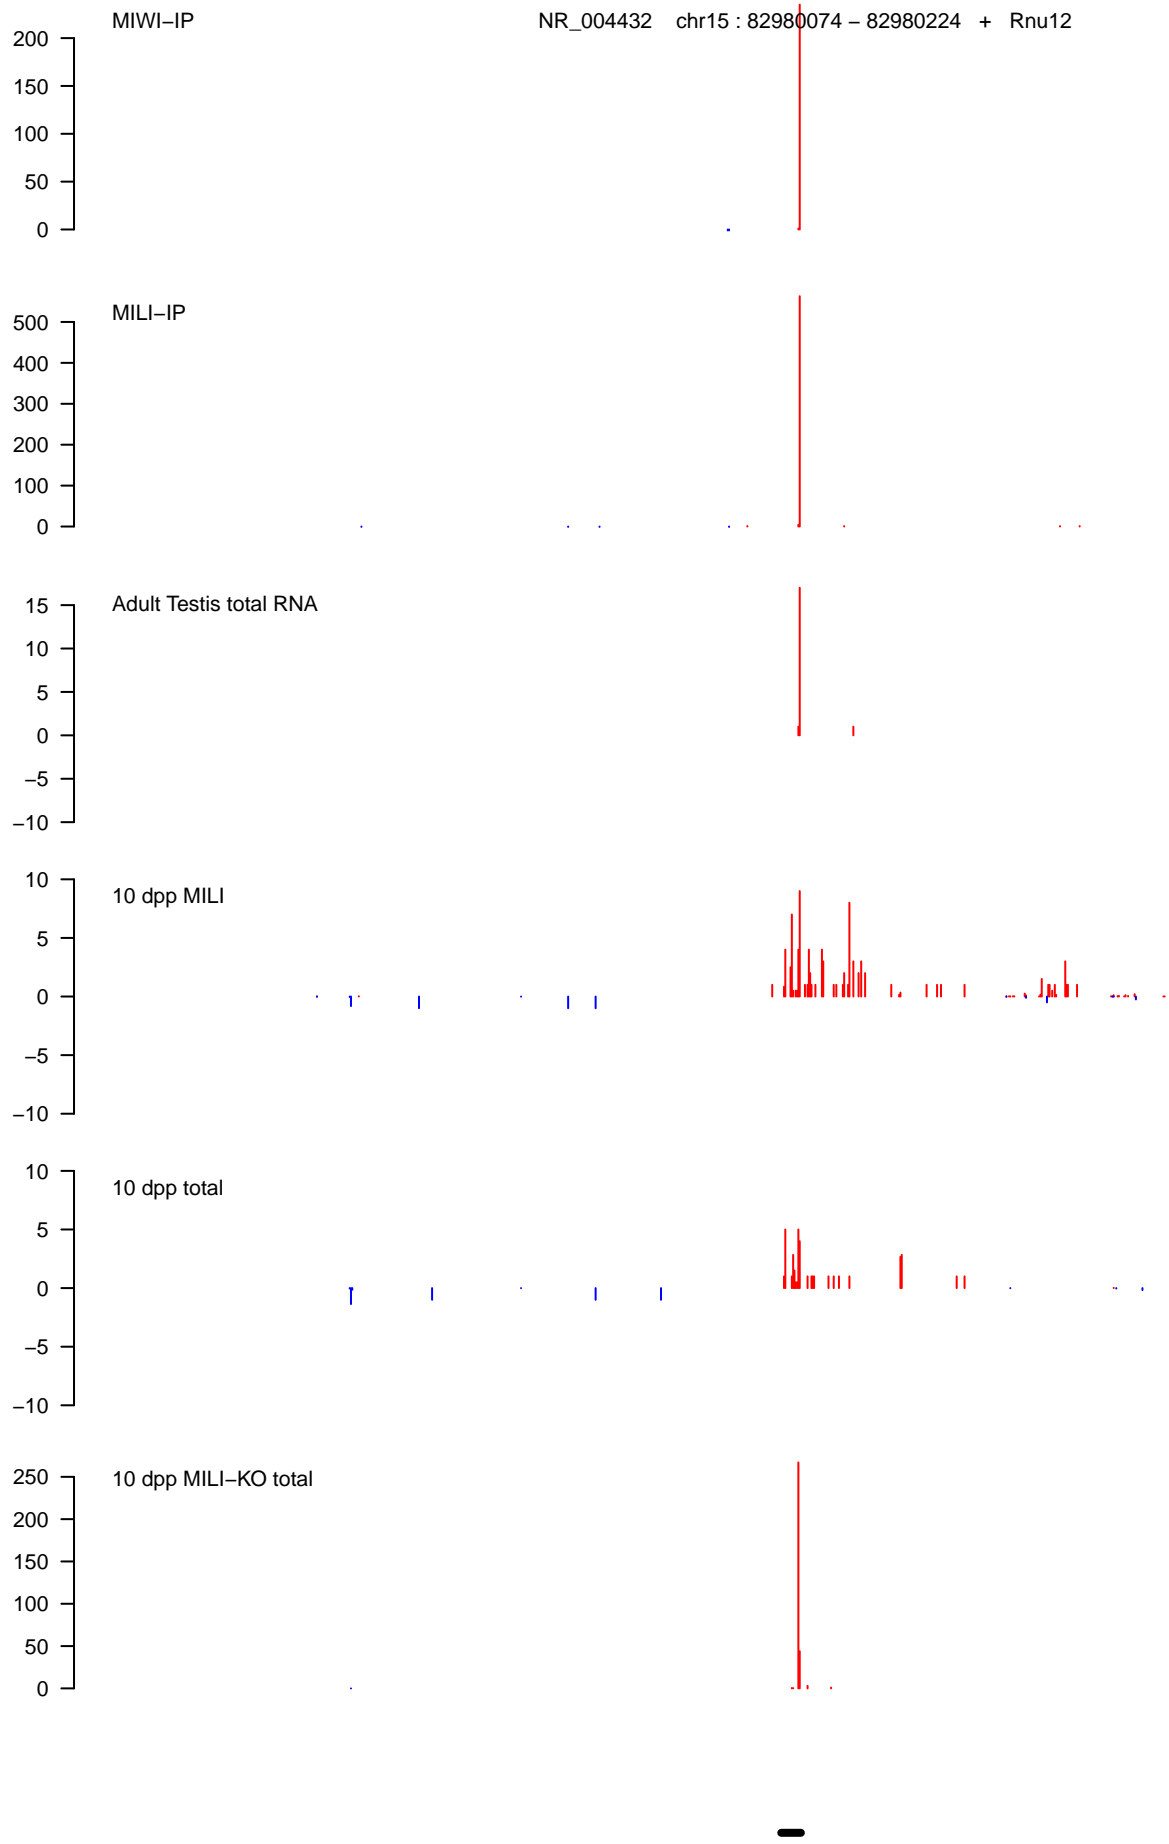

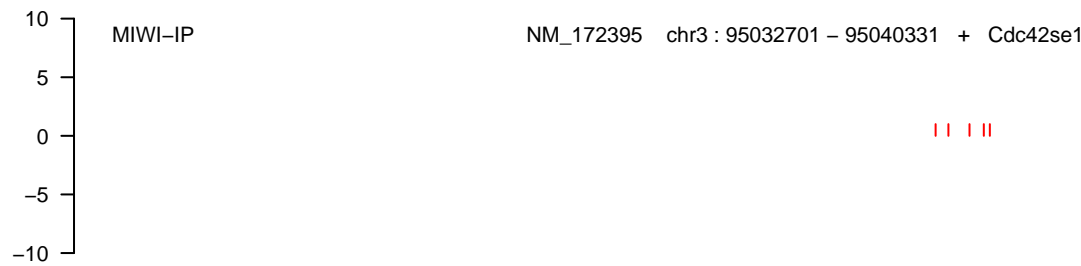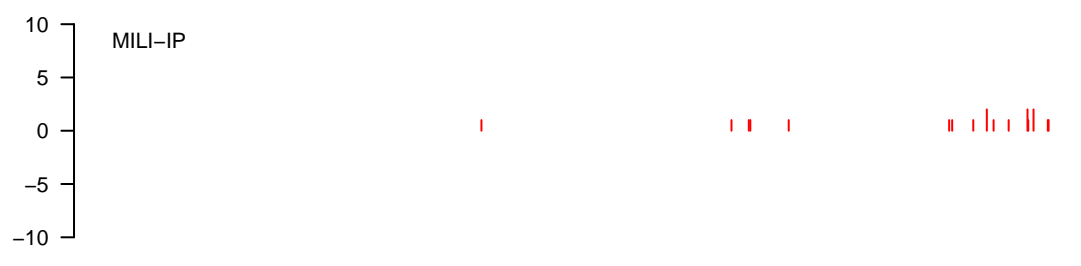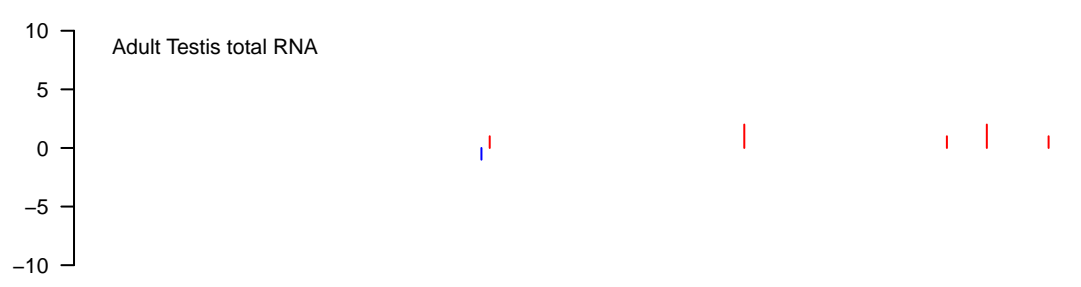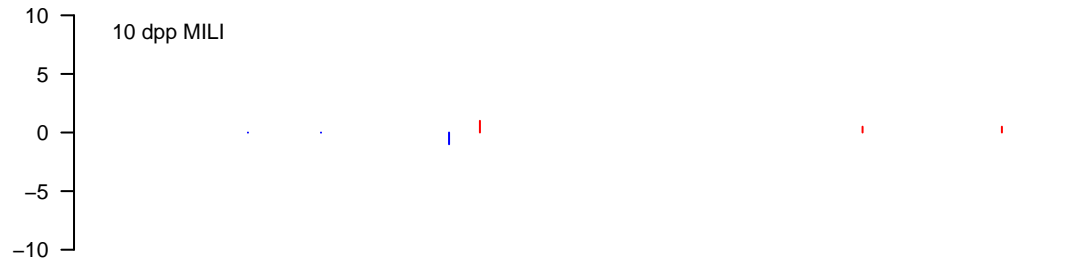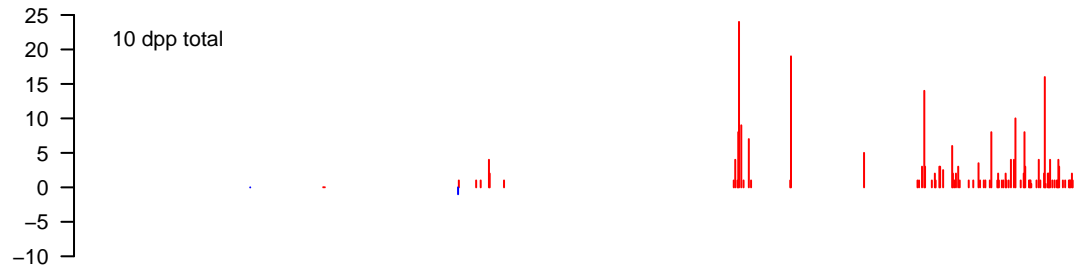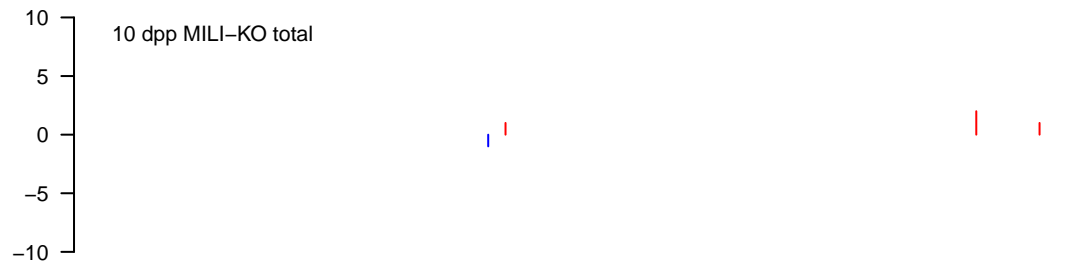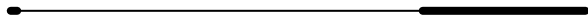

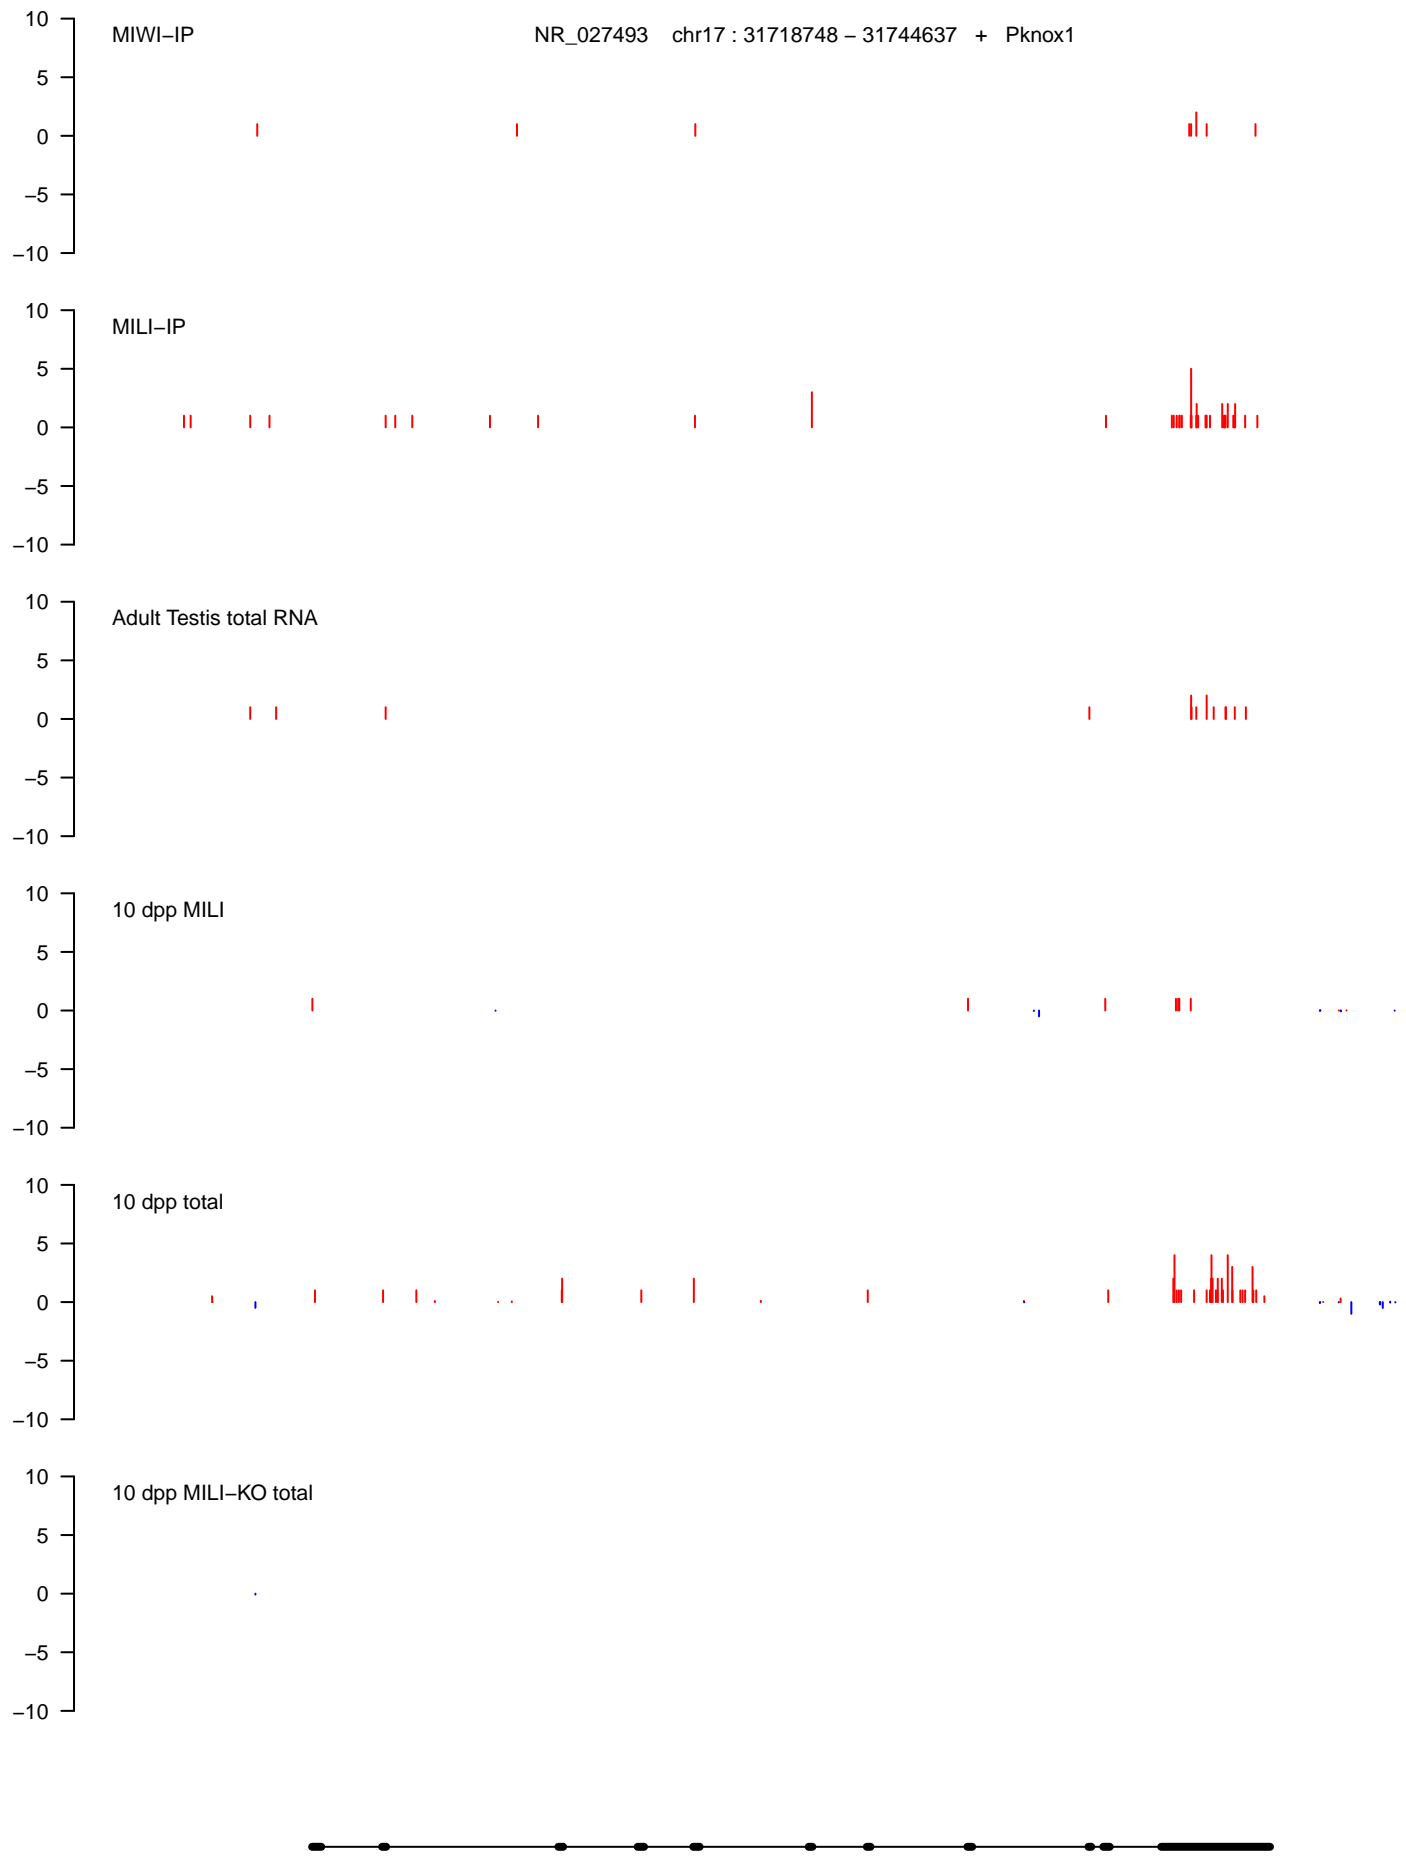

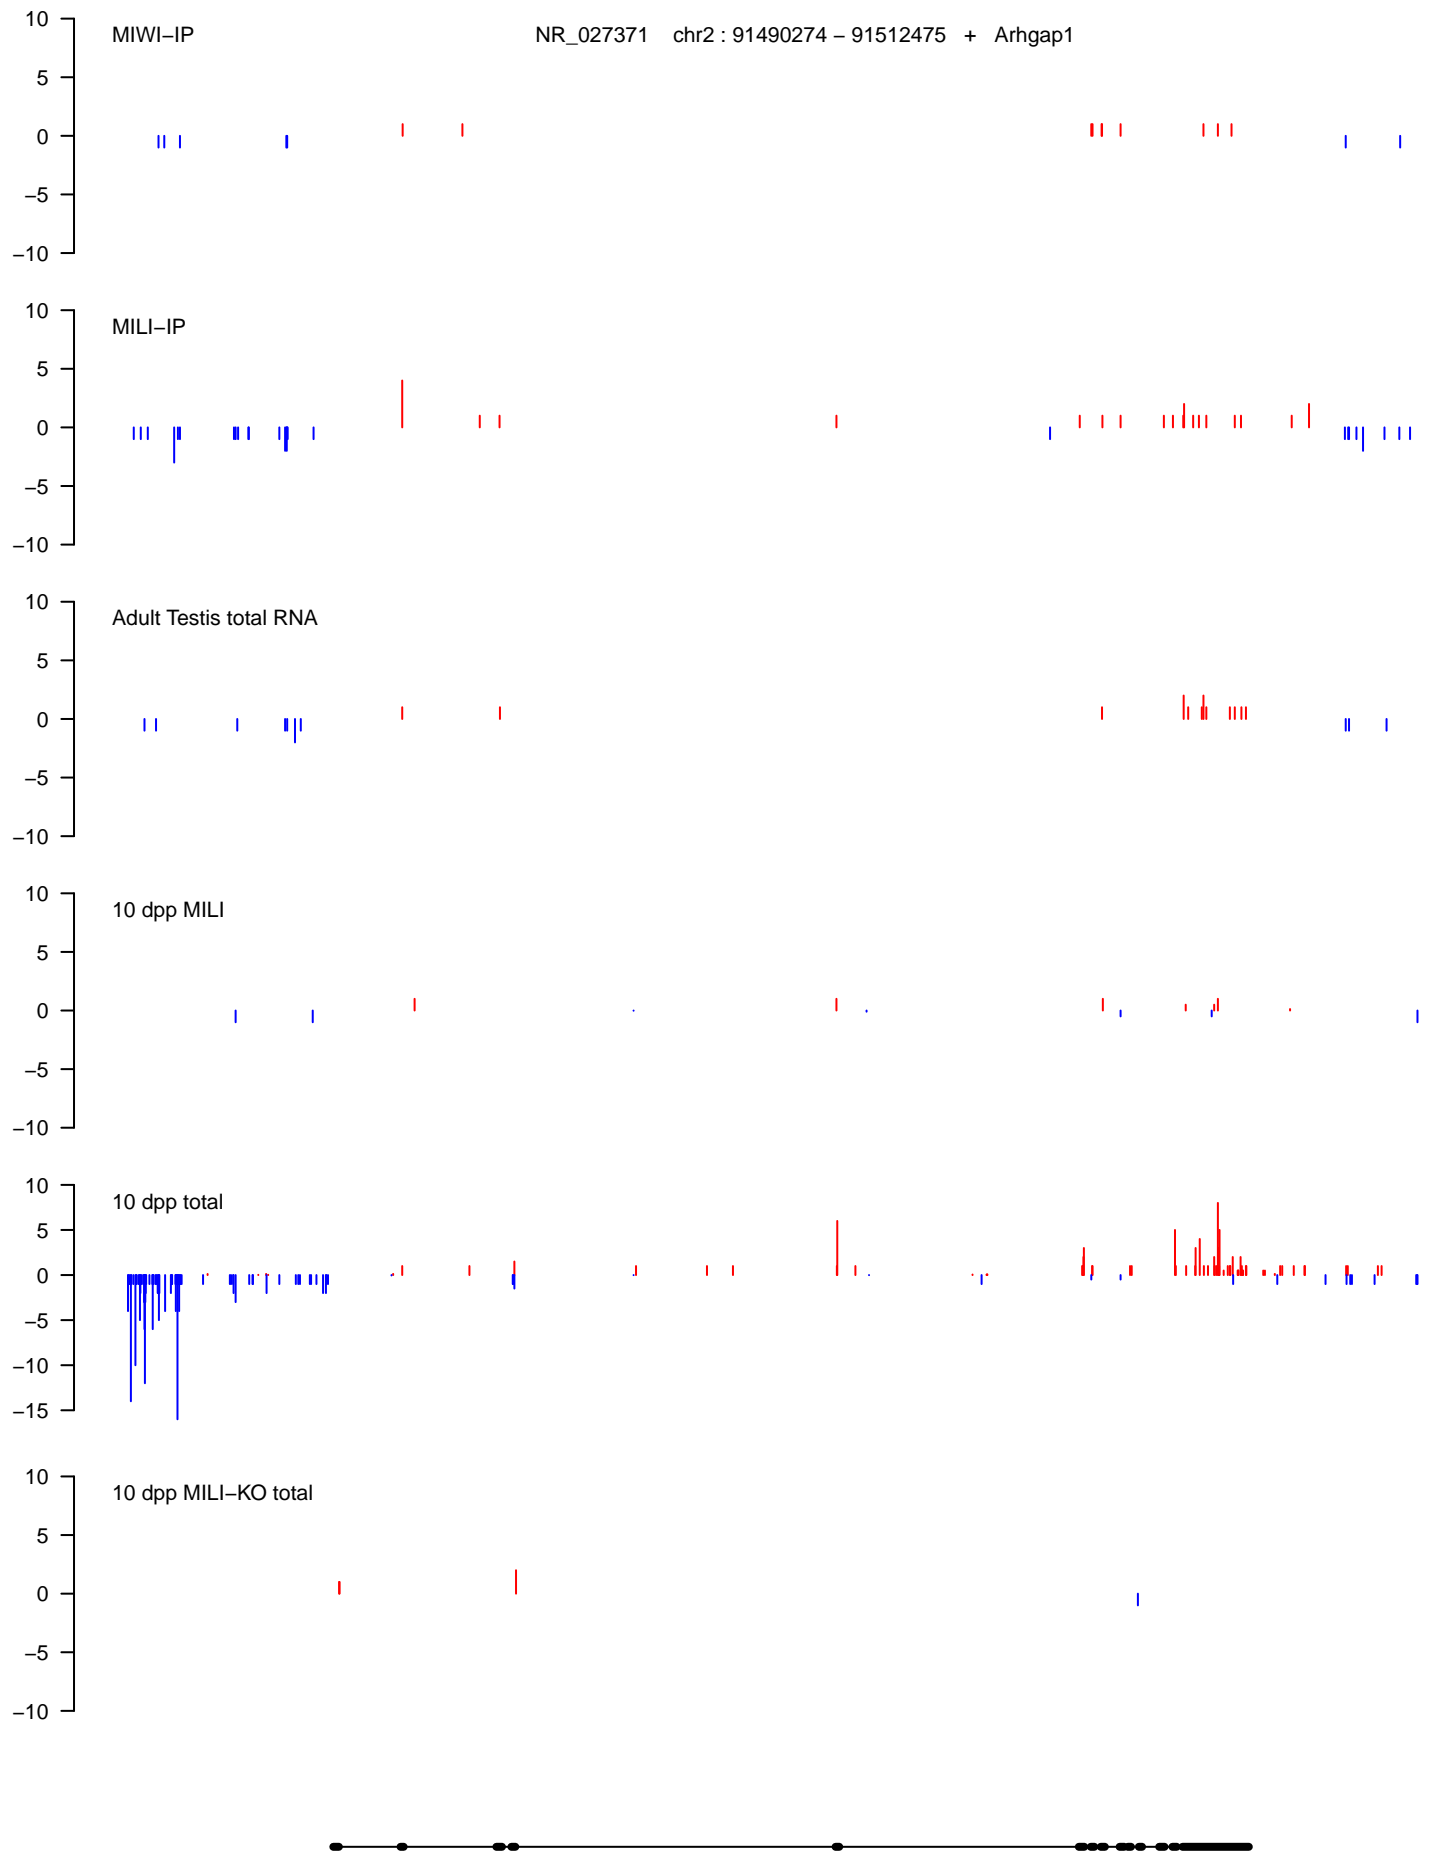

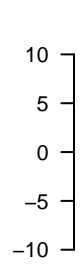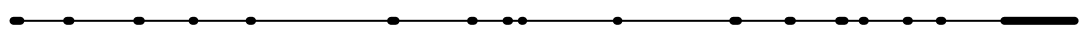

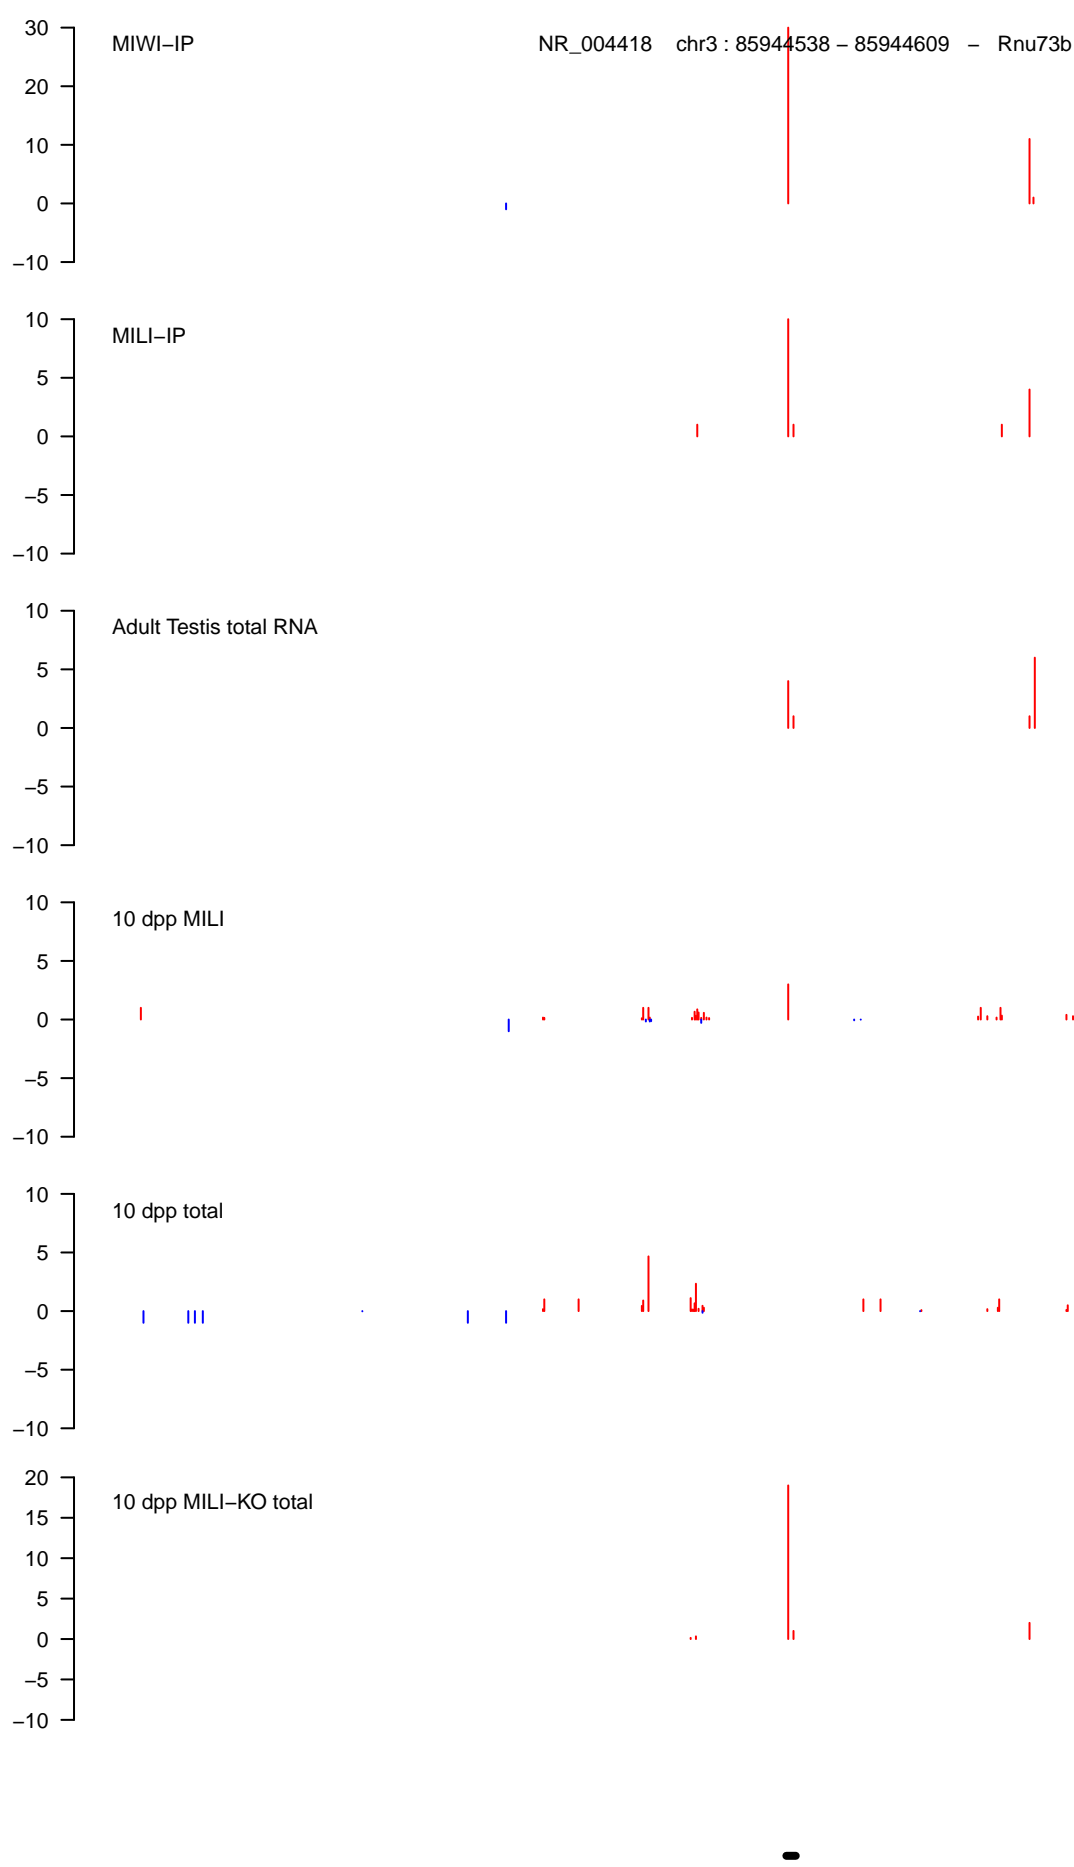

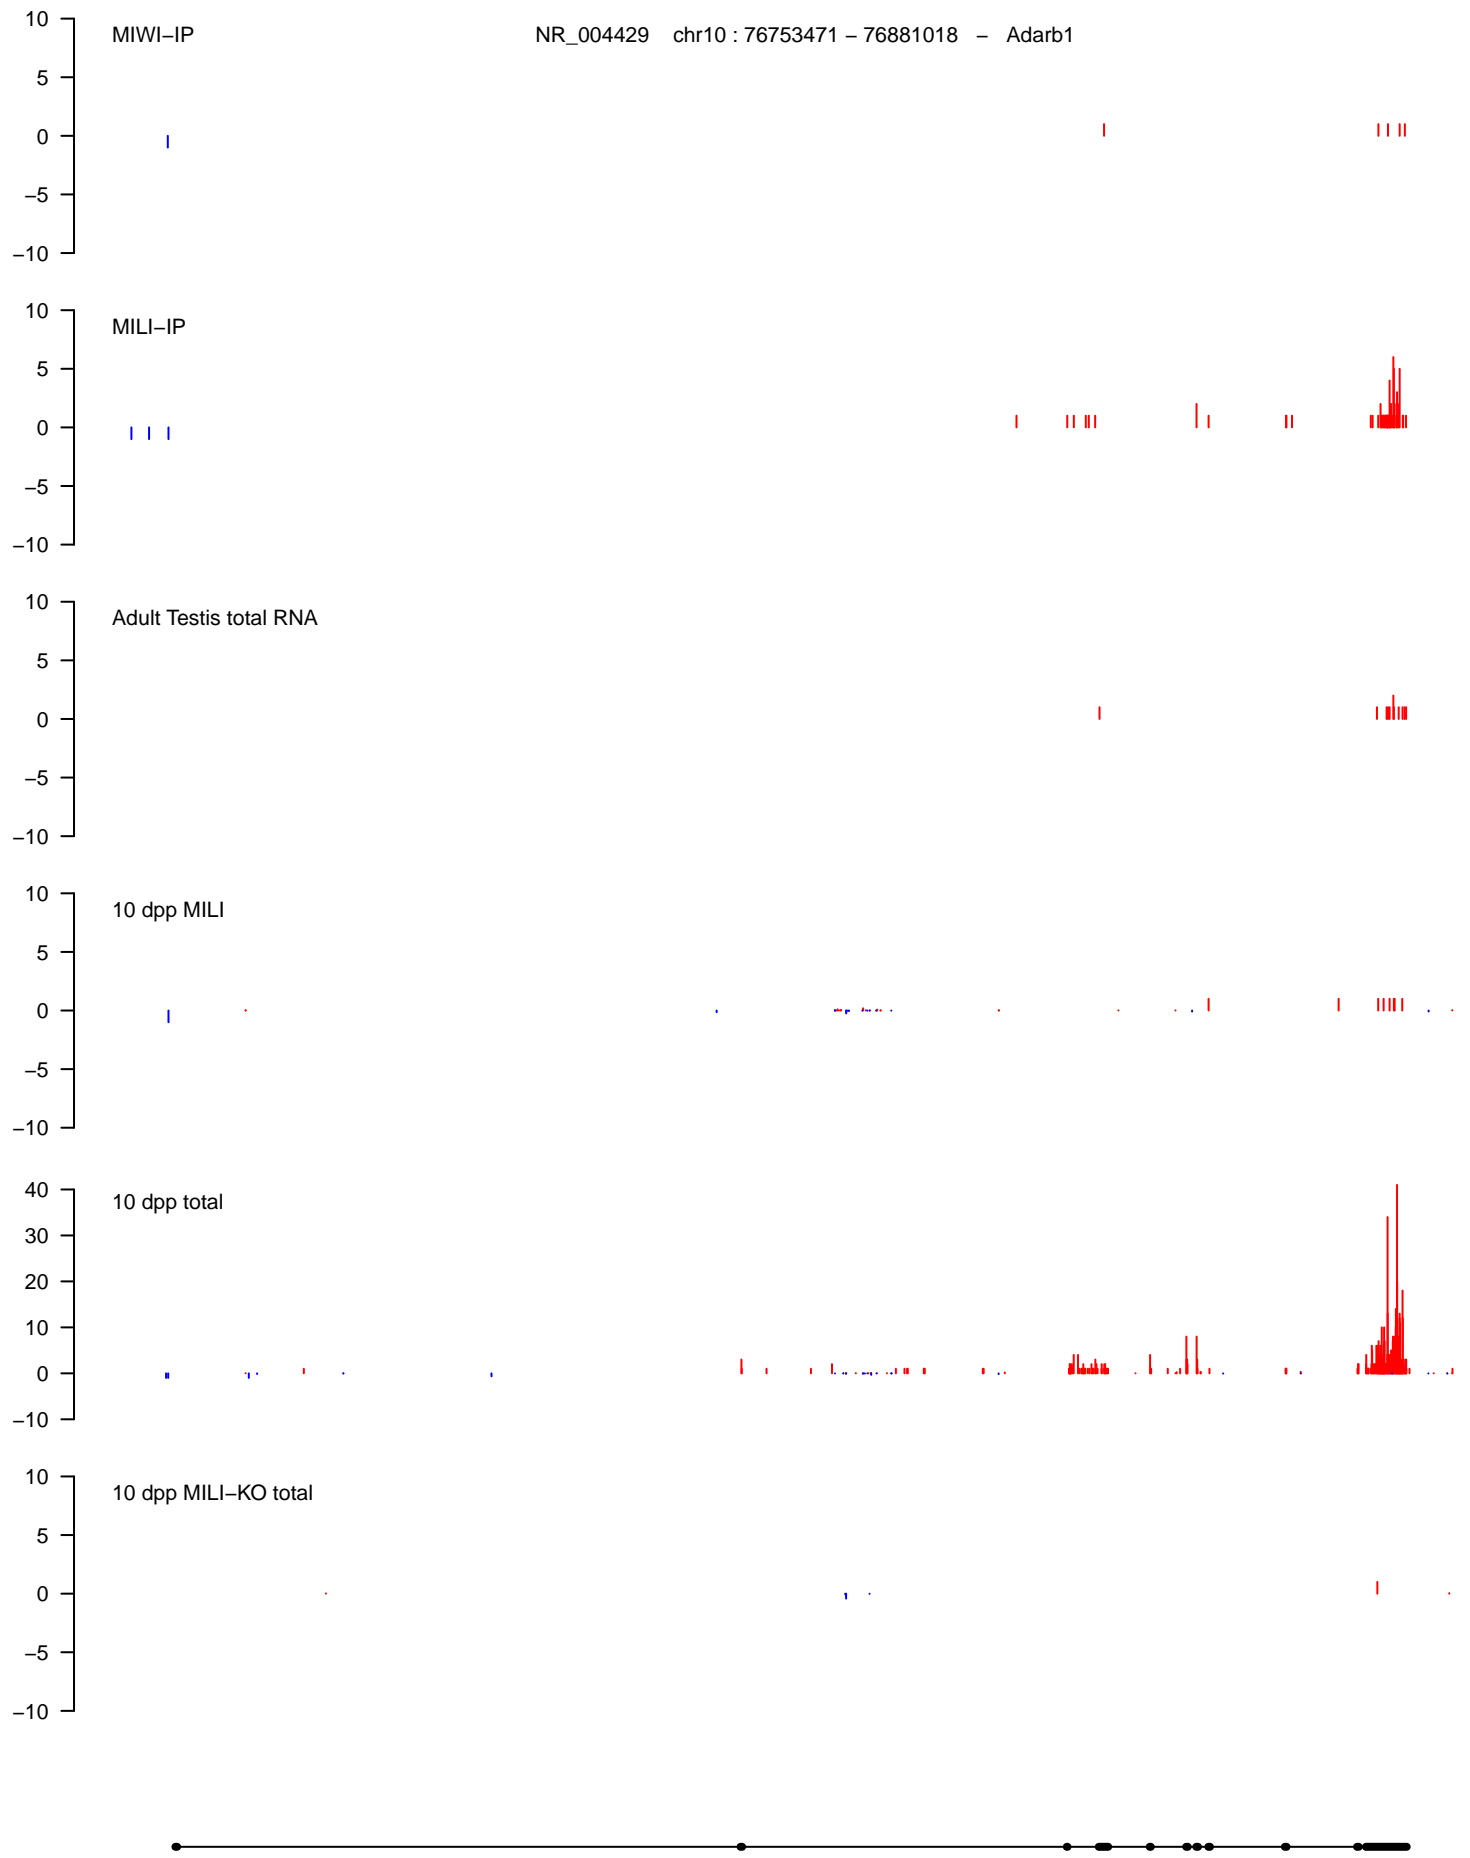

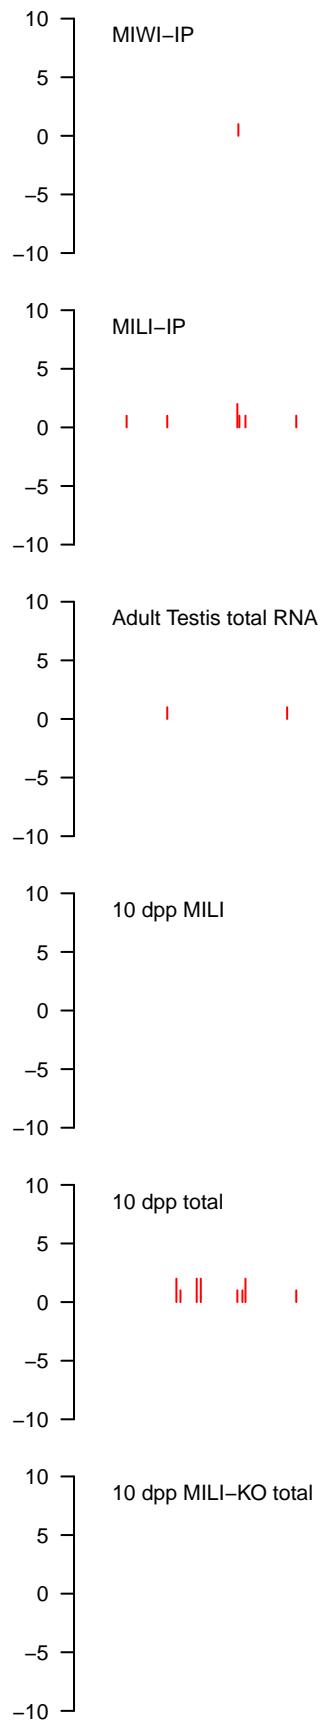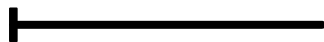



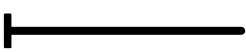

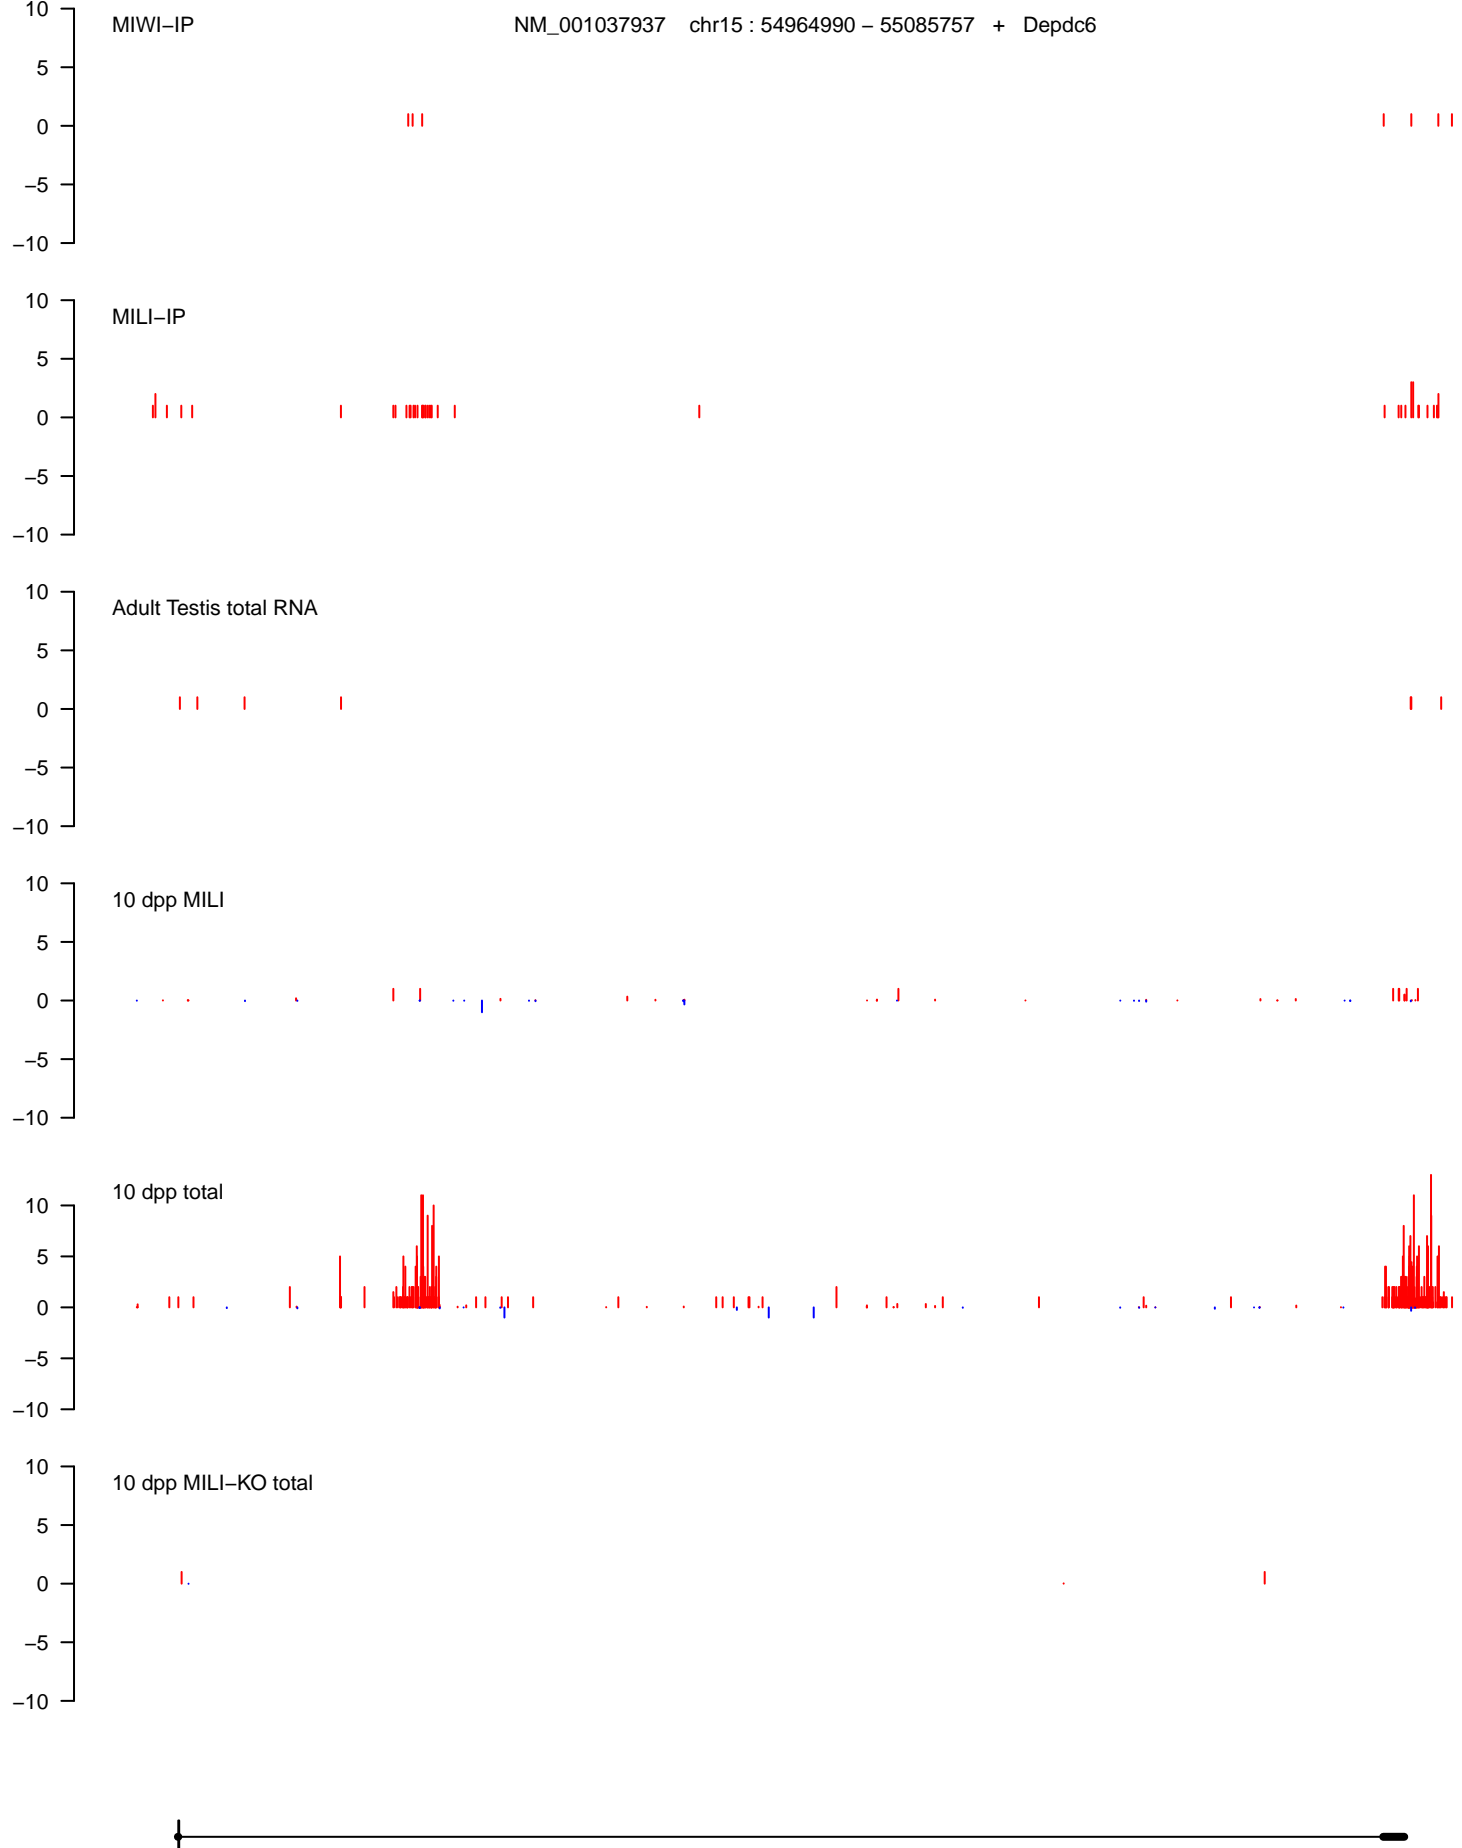

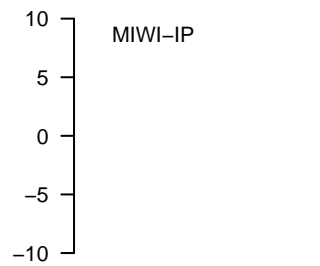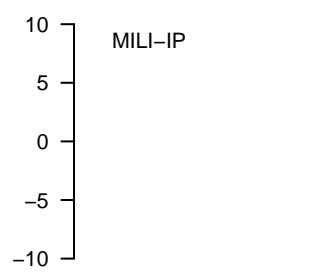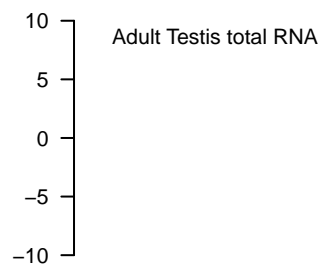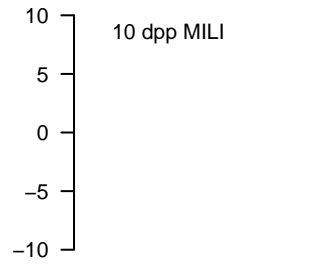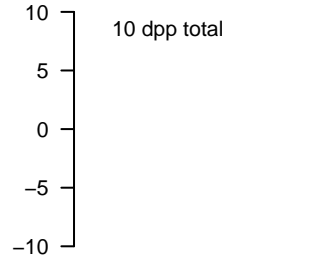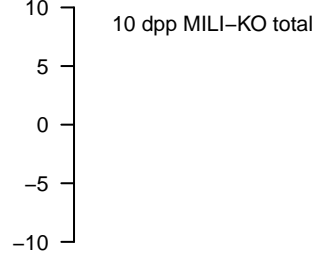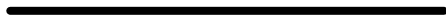

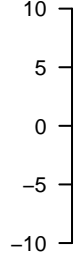

MIWI-IP

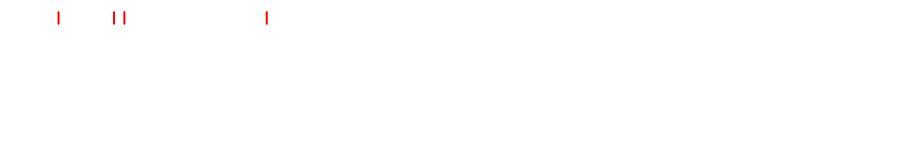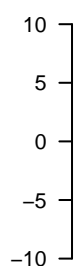

MILI-IP

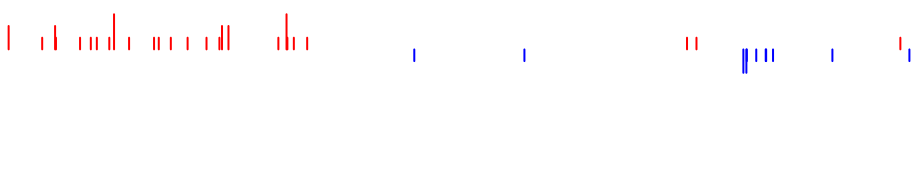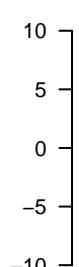

Adult Testis total RNA

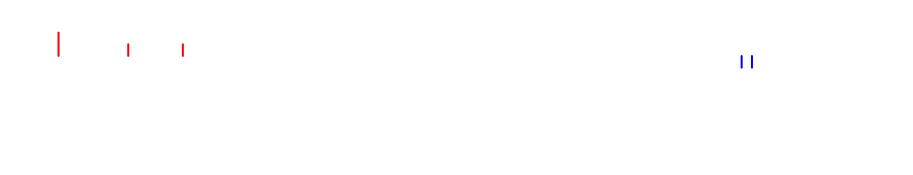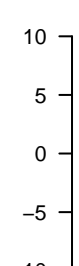

10 dpp MILI

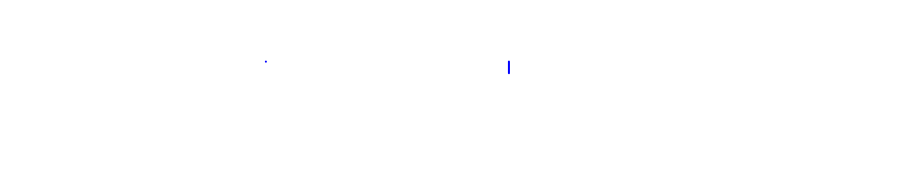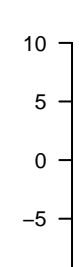

10 dpp total

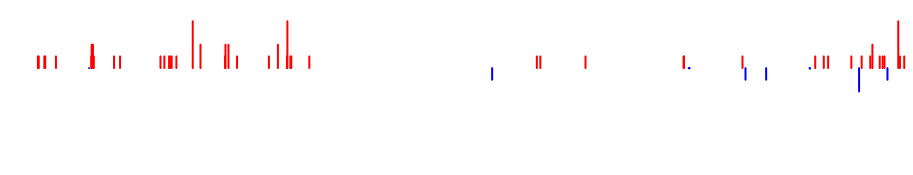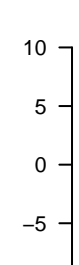

10 dpp MILI-KO total

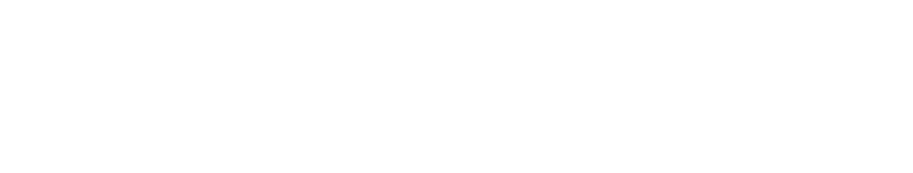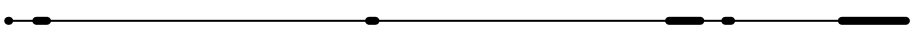

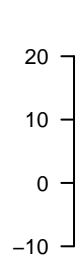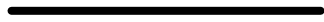

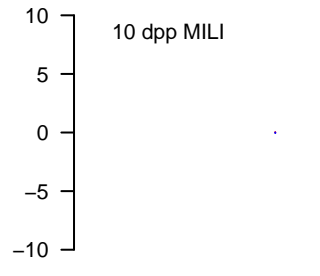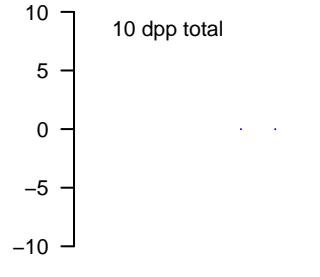

NM\_152894 chr15 : 34425086 – 34460403 + Pop1

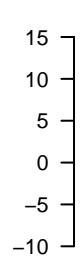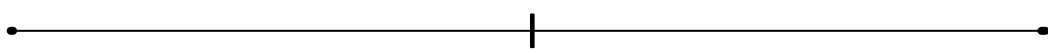

NM\_152894 chr15 34425086 34460403 + Pop1

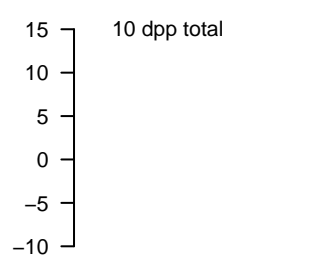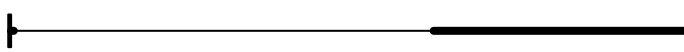



MIWI-IP  
MILI-IP  
Adult Testis total RNA  
10 dpp MILI  
10 dpp total  
10 dpp MILI-KO total

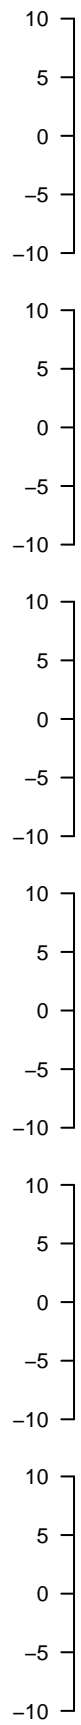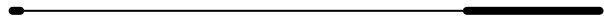



NR\_003518 chr11 : 3024029 – 3031945 + 4933439C20Rik



MIWI-IP



MILI-IP



Adult Testis total RNA



10 dpp MILI



10 dpp total



10 dpp MILI-KO total

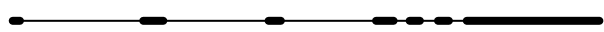

NR\_003518 chr11 3024029 3031945 + 4933439C20Rik

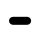

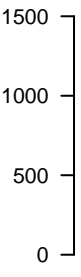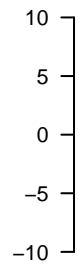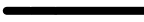

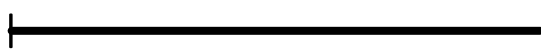

NM\_001012477 chr6 : 117126103 – 117131385 + Cxcl12



MIWI-IP

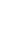

MILI-IP



Adult Testis total RNA



10 dpp MILI

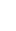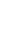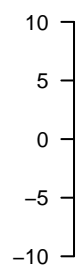

10 dpp total

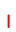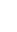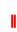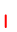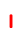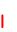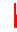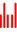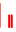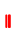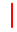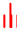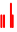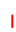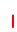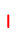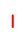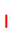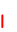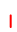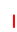

10 dpp MILI-KO total

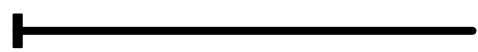

NM\_001012477 chr6 117126103 117131385 + Cxcl12

NM\_016812 chr8 : 124530990 – 124531062 + Banp

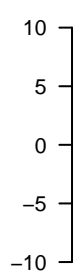

MIWI-IP

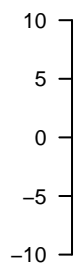

MILI-IP

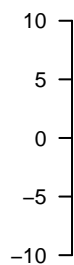

Adult Testis total RNA

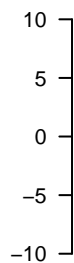

10 dpp MILI

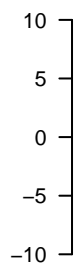

10 dpp total

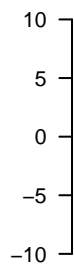

10 dpp MILI-KO total

NM\_016812 chr8 124530990 124531062 + Banp

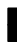



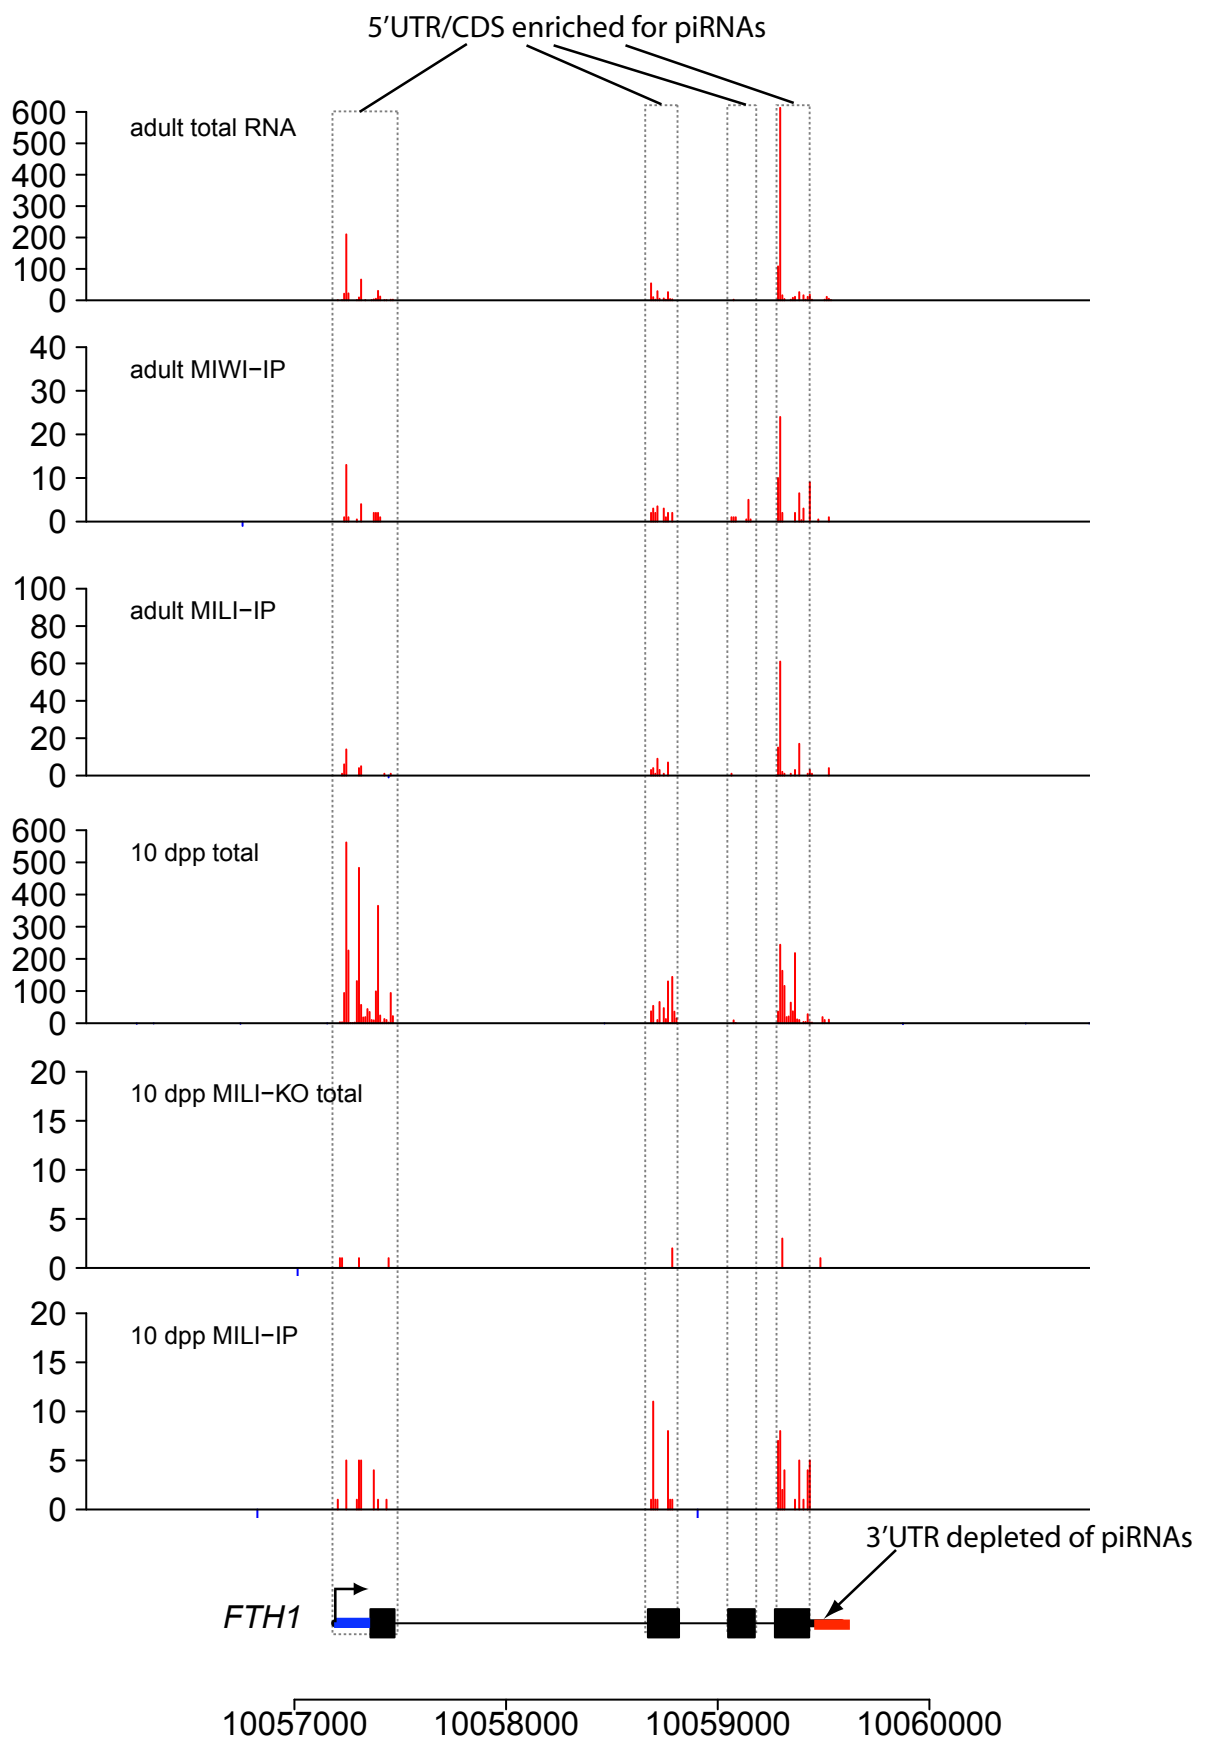

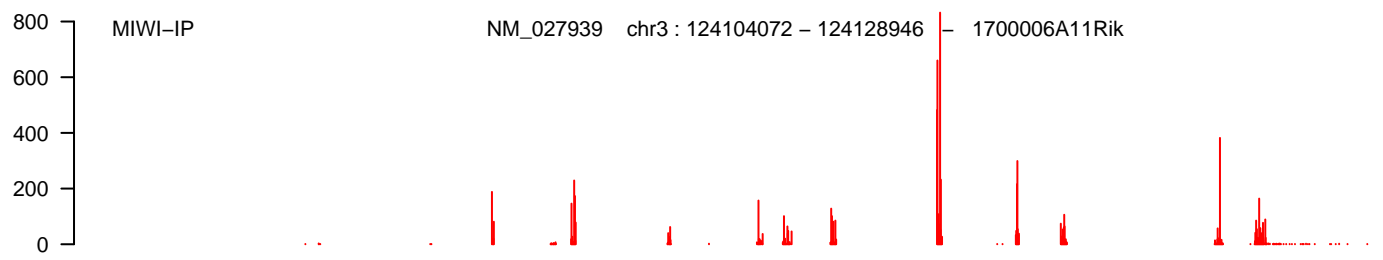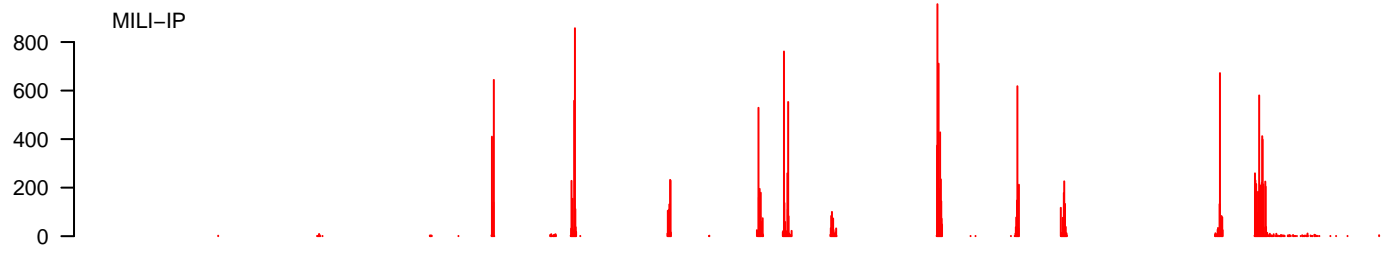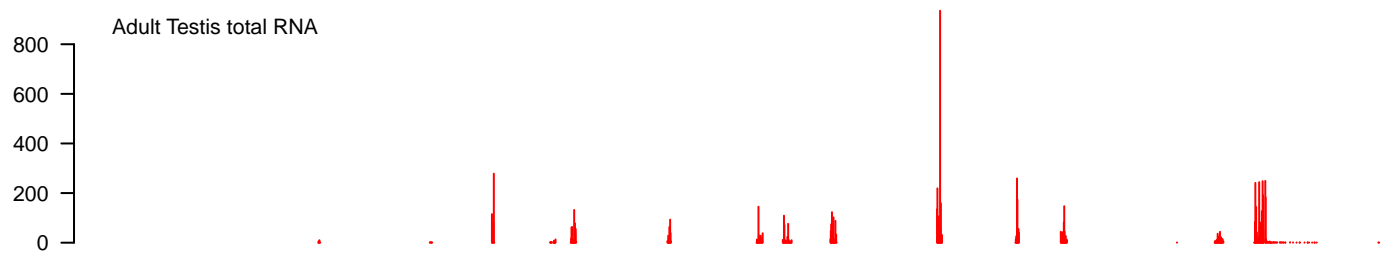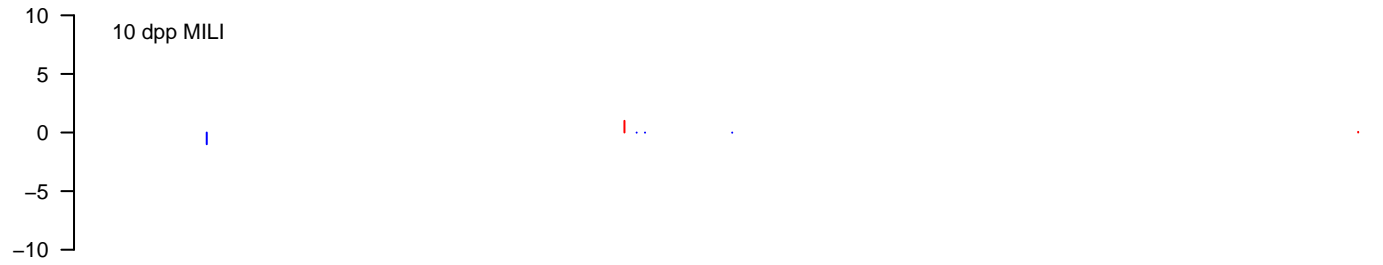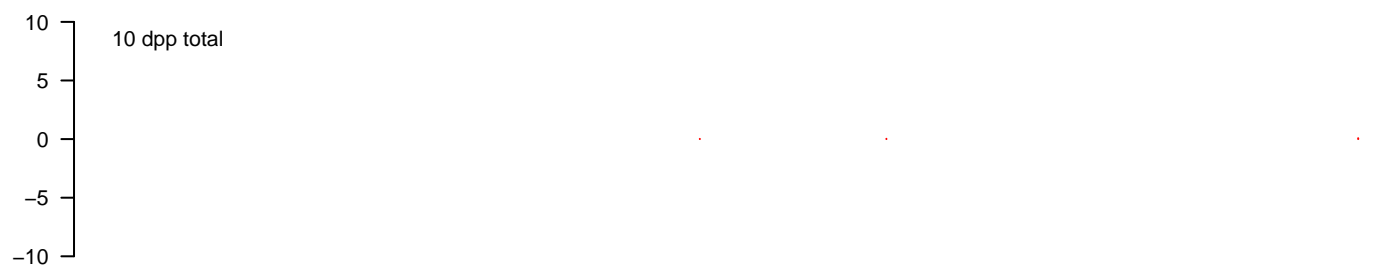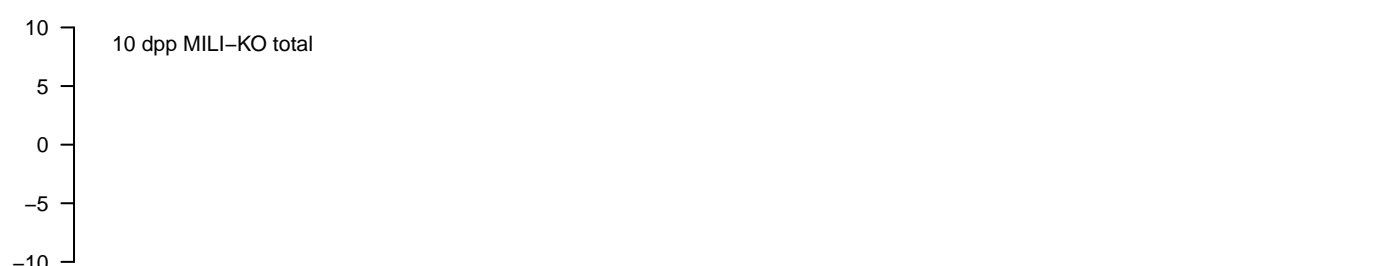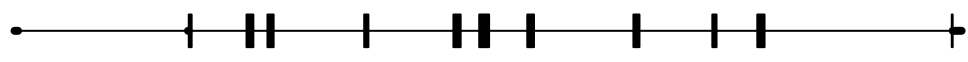

NM\_027939 chr3 124104072 124128946 – 1700006A11Rik

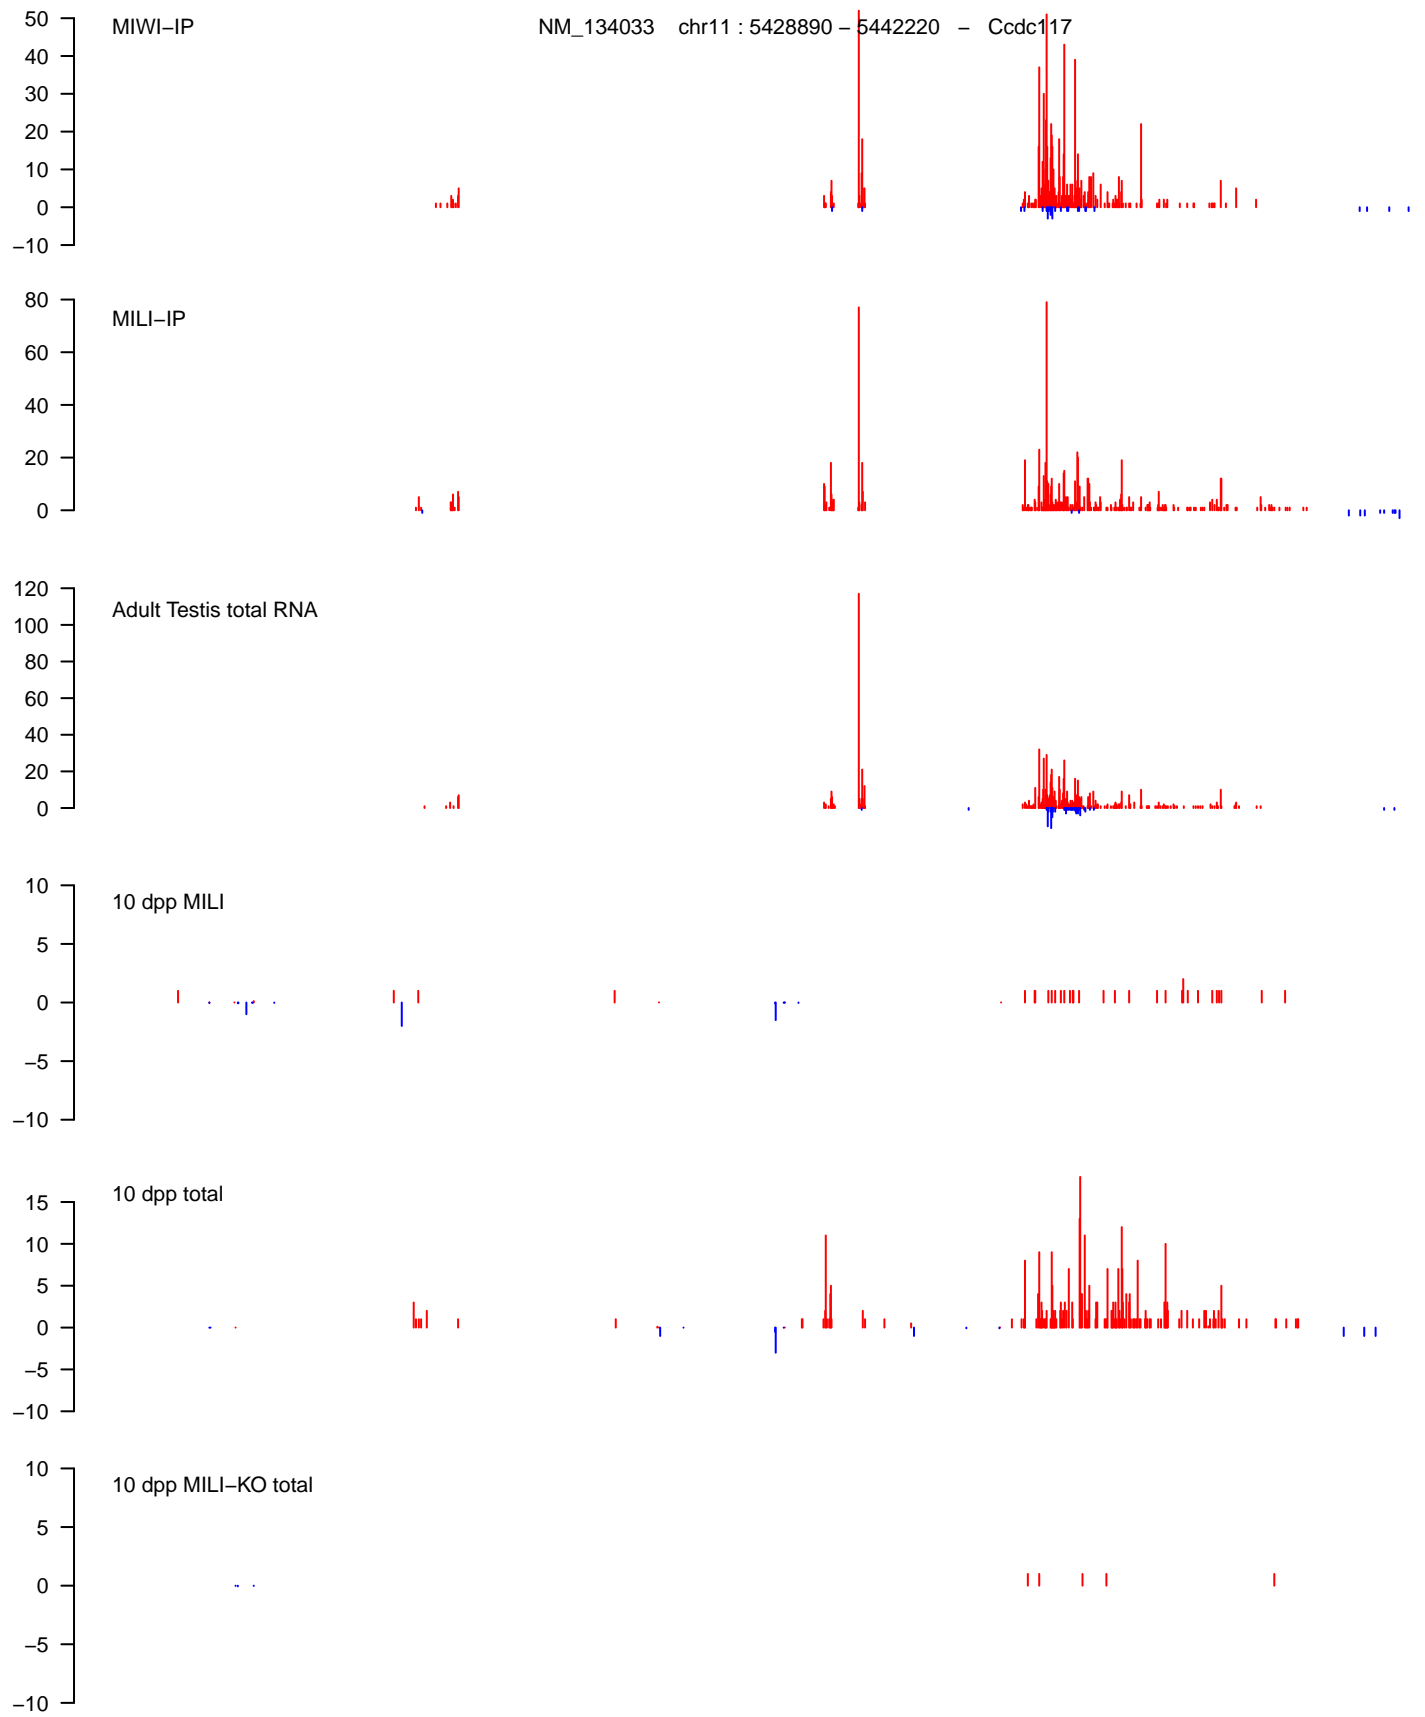

NM\_134033 chr11 : 5428890 - 5442220 - Ccdc117

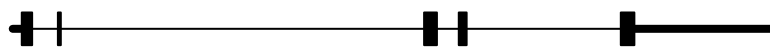

NM\_134033 chr11 5428890 5442220 - Ccdc117

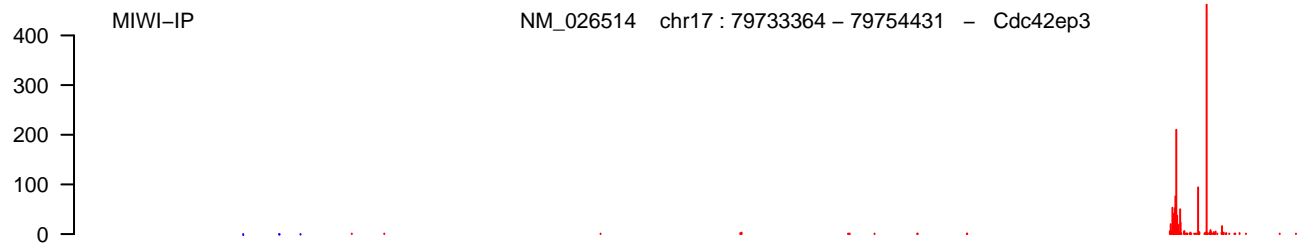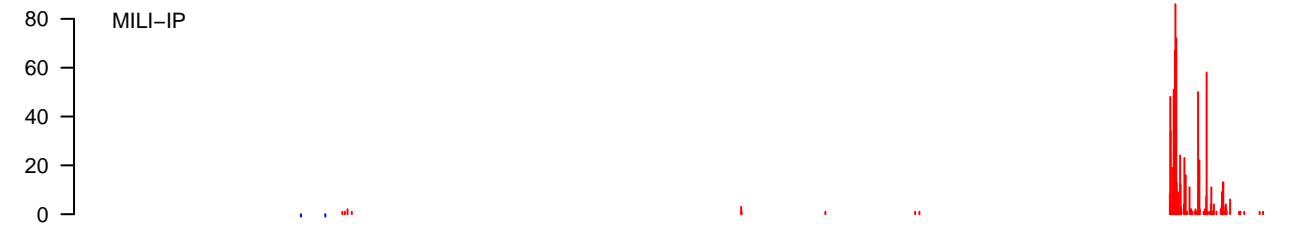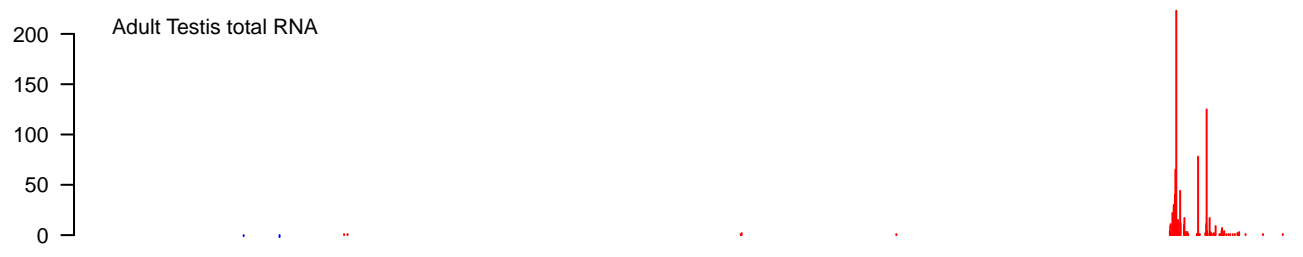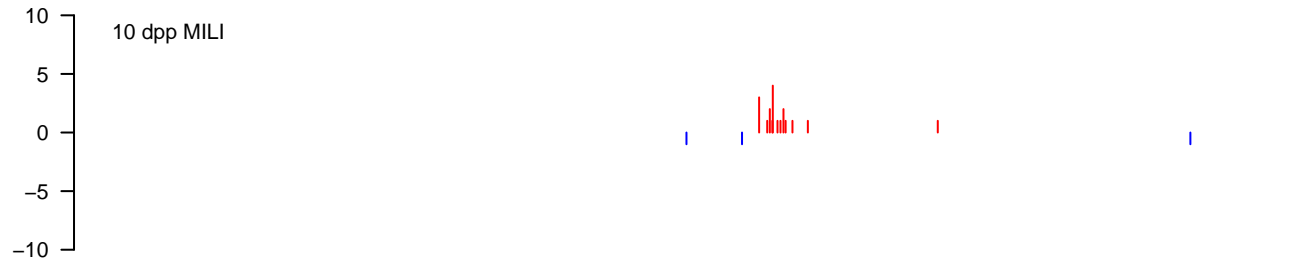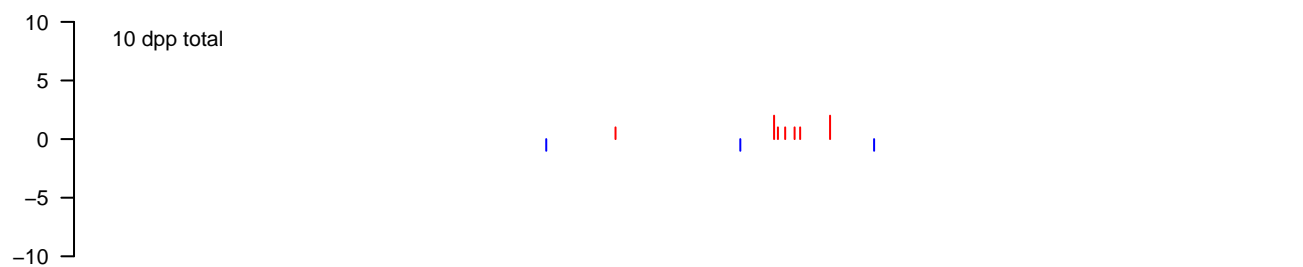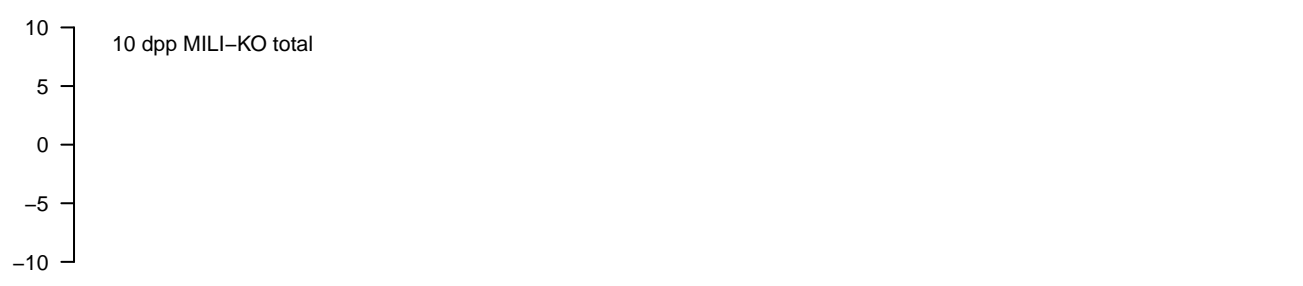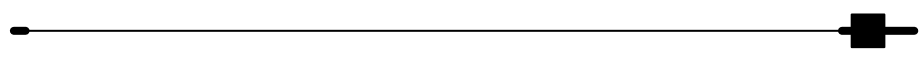

NM\_212473 chr7: 139903766 - 140004879 - Fam53b

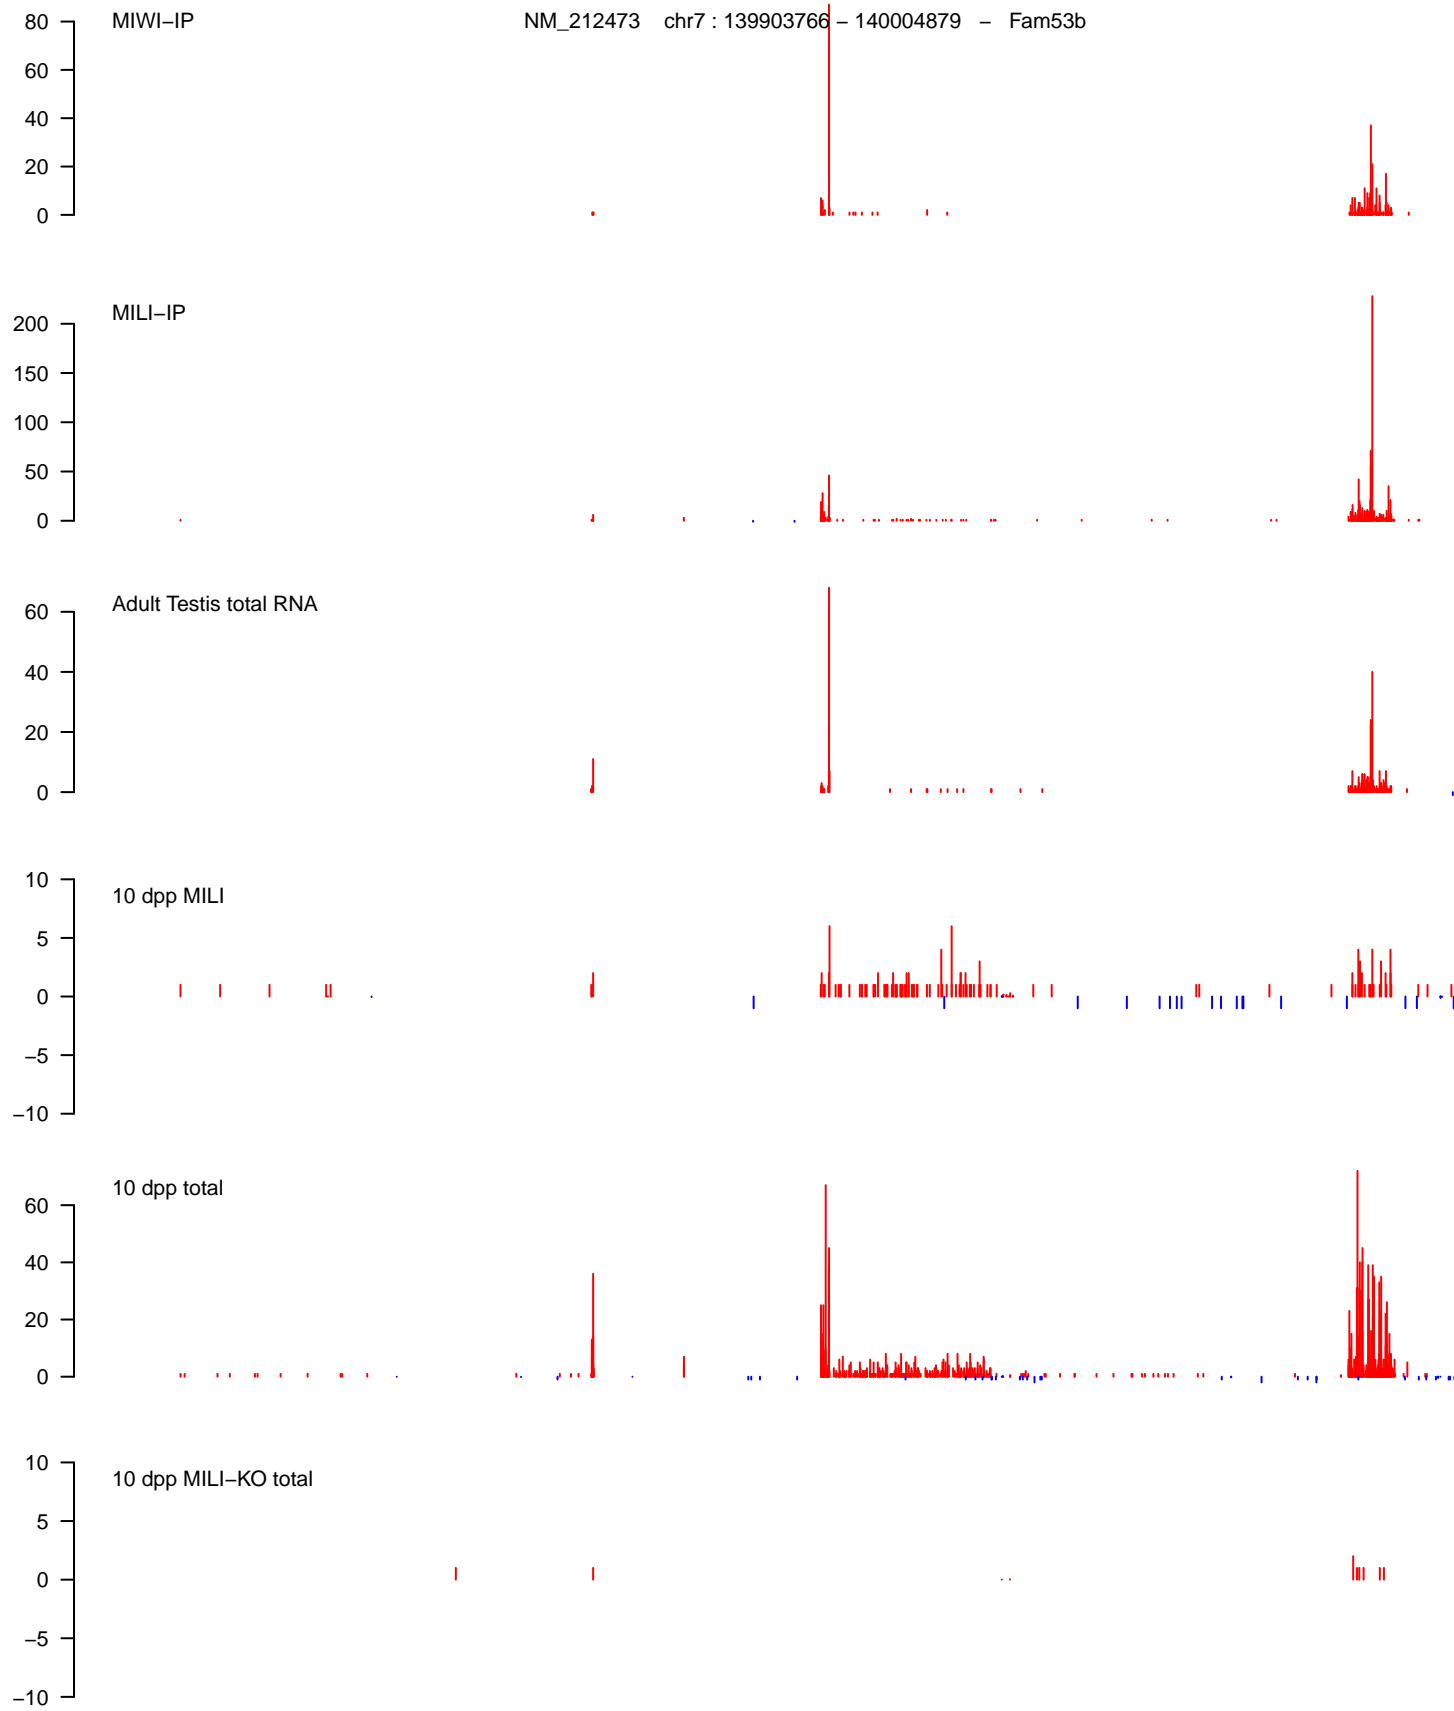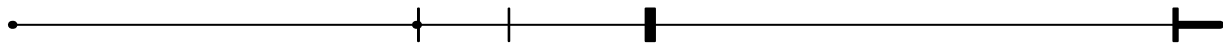

NM\_212473 chr7 139903766 140004879 - Fam53b

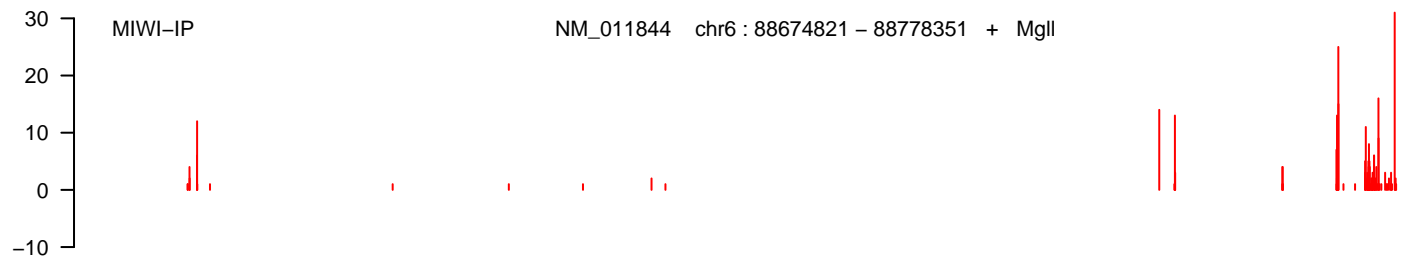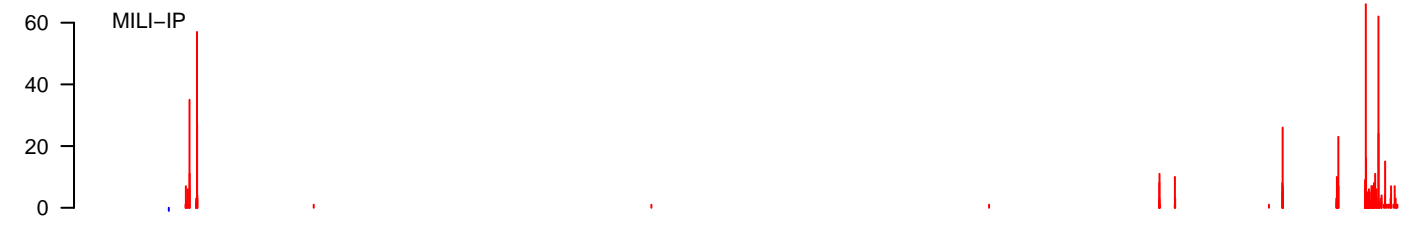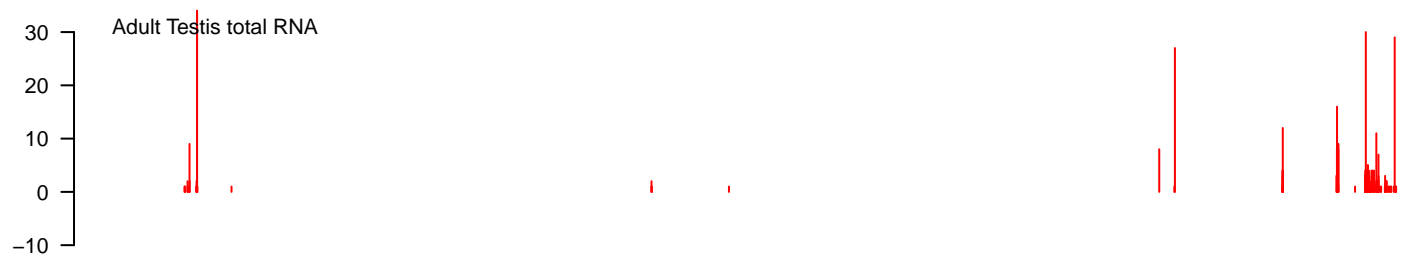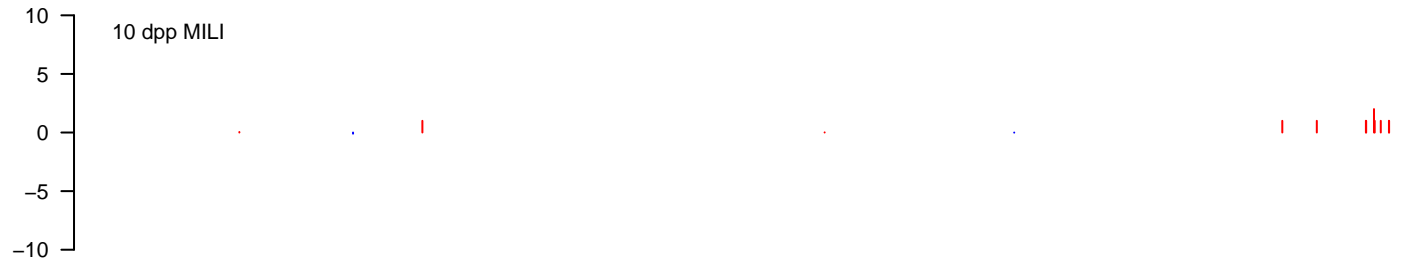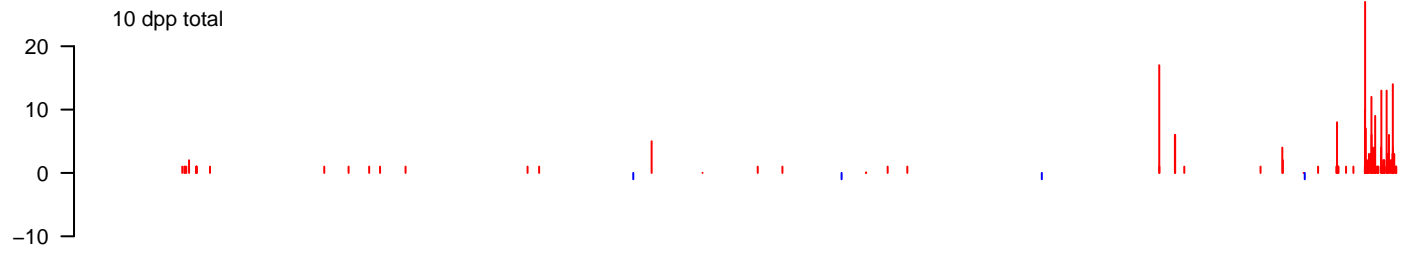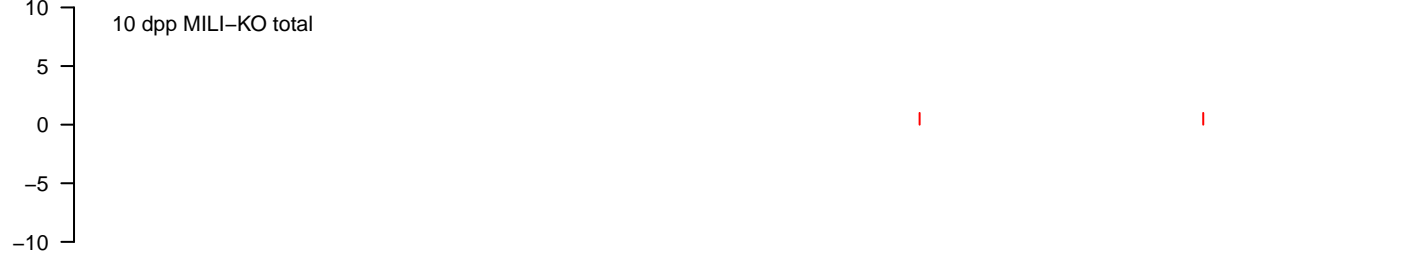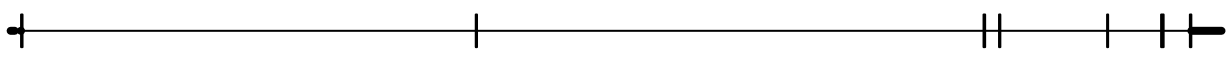

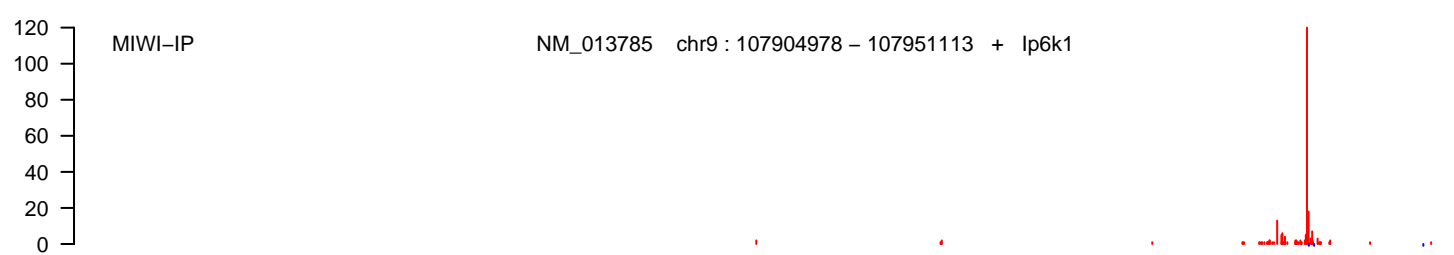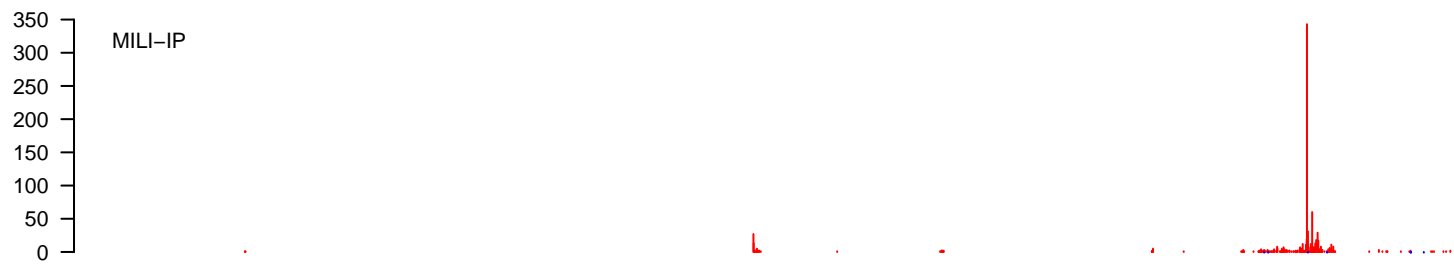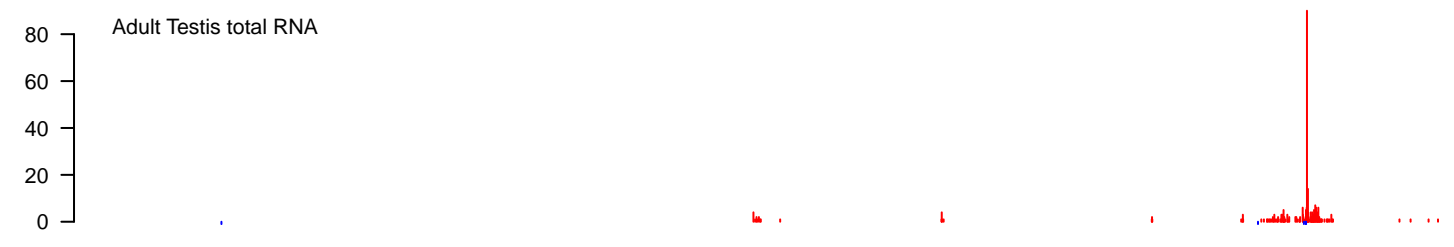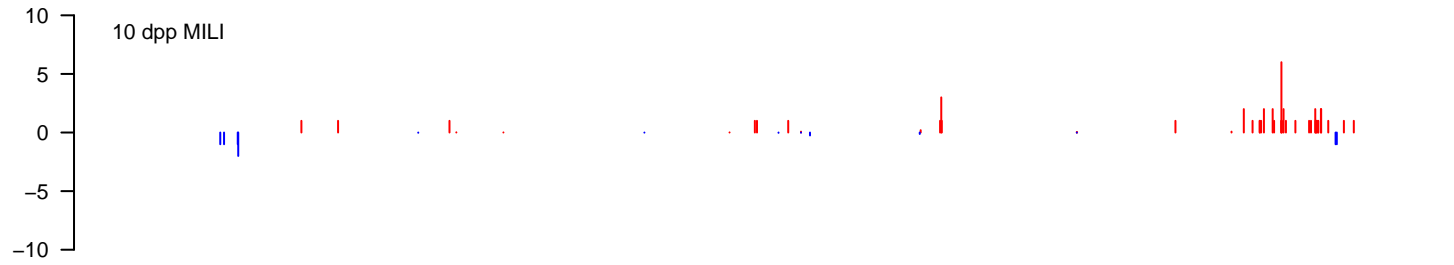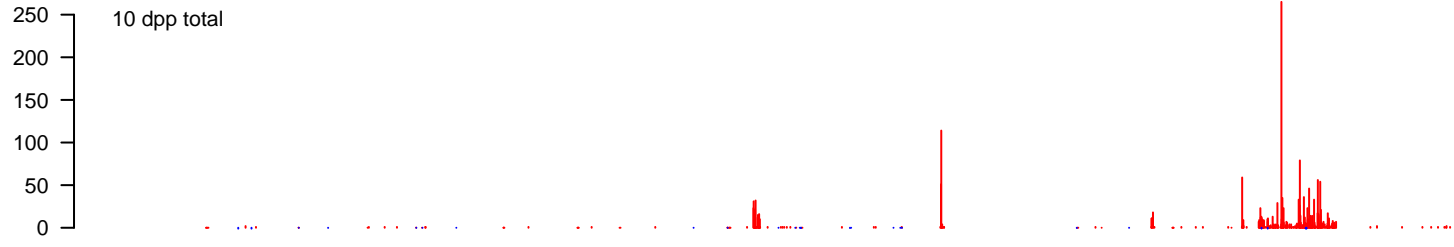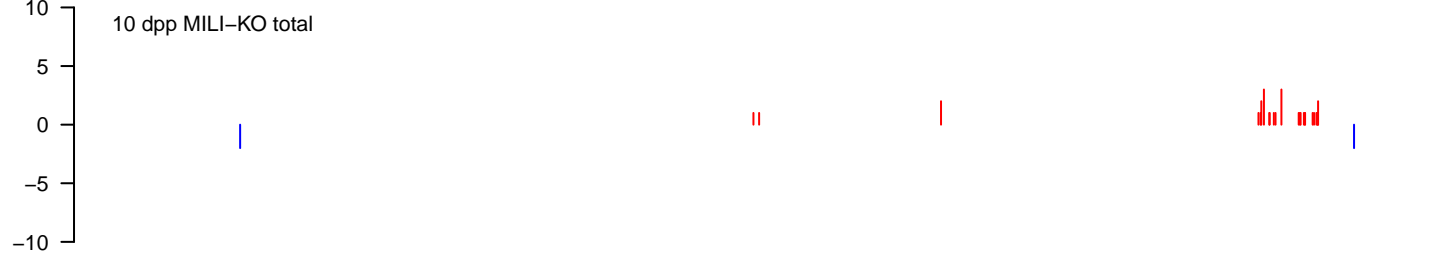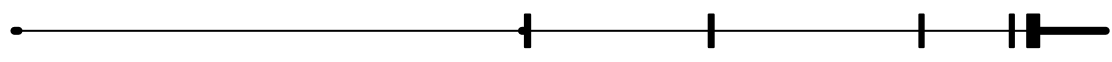

NM\_013785 chr9 107904978 107951113 + Ip6k1

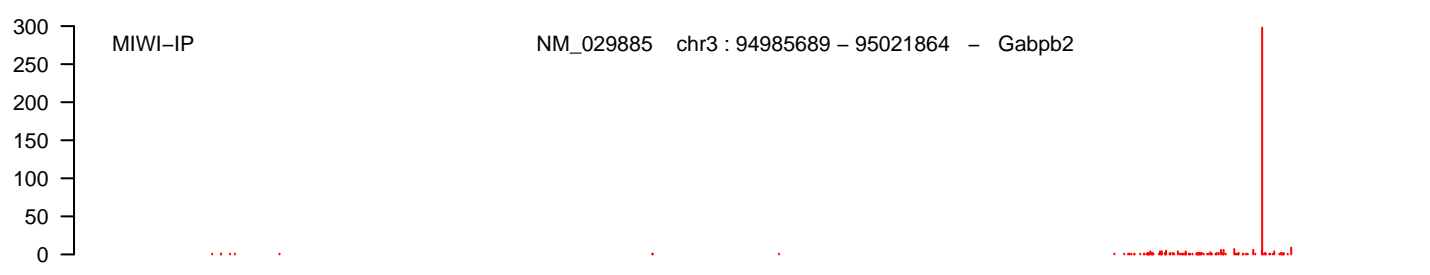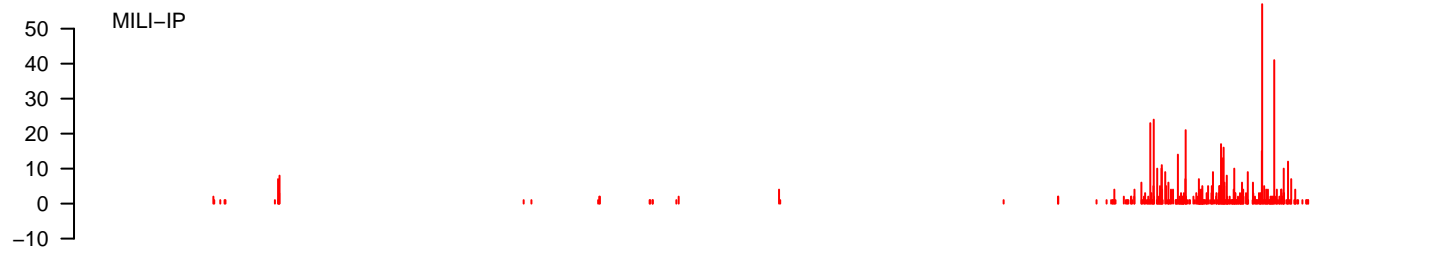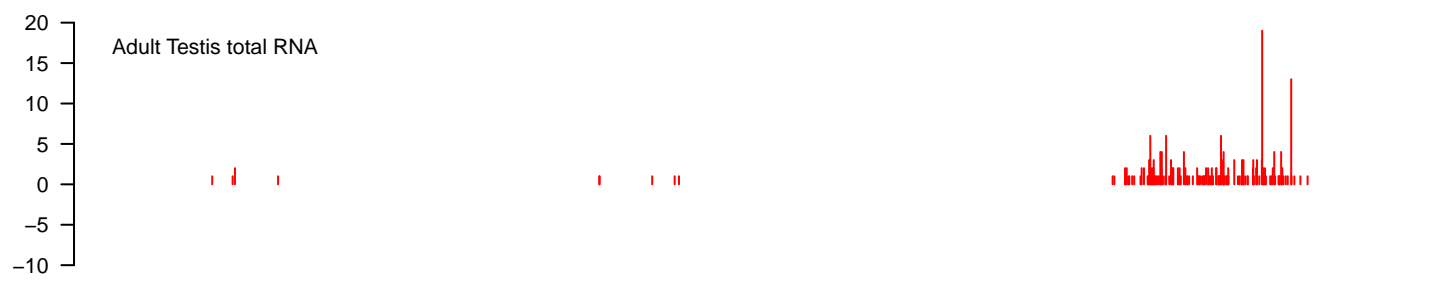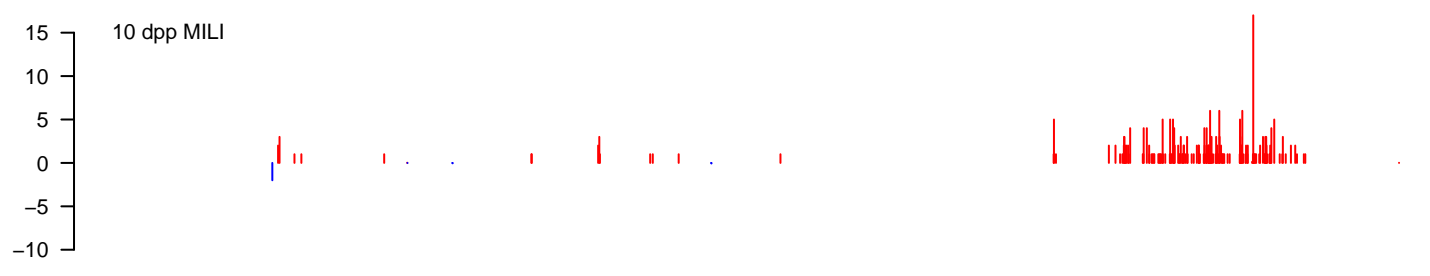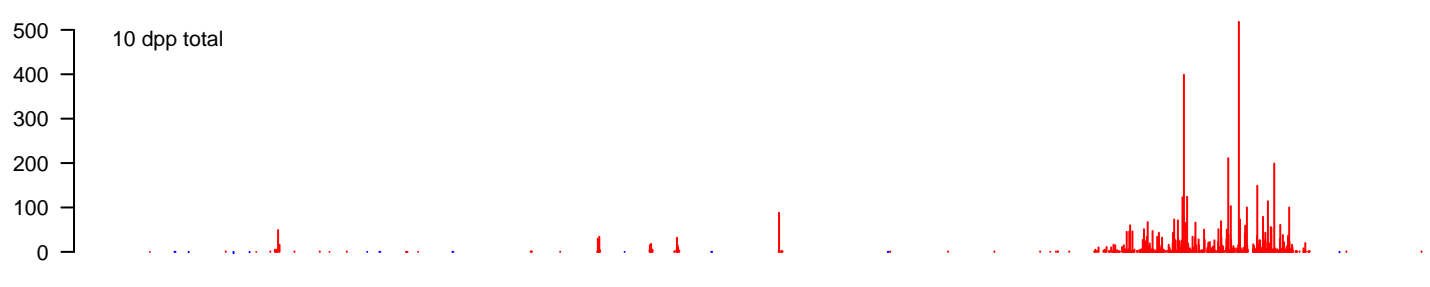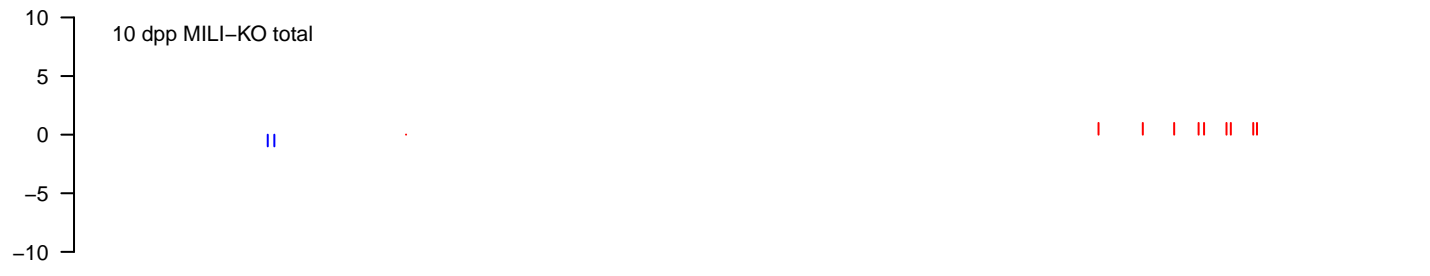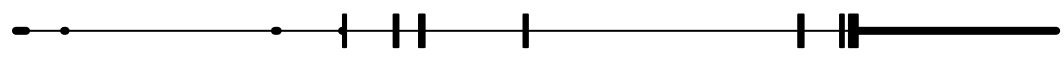

NM\_029885 chr3 94985689 95021864 – Gabpb2



NM\_175543 chr11 : 79404713 – 79507514 + Rab11fip4

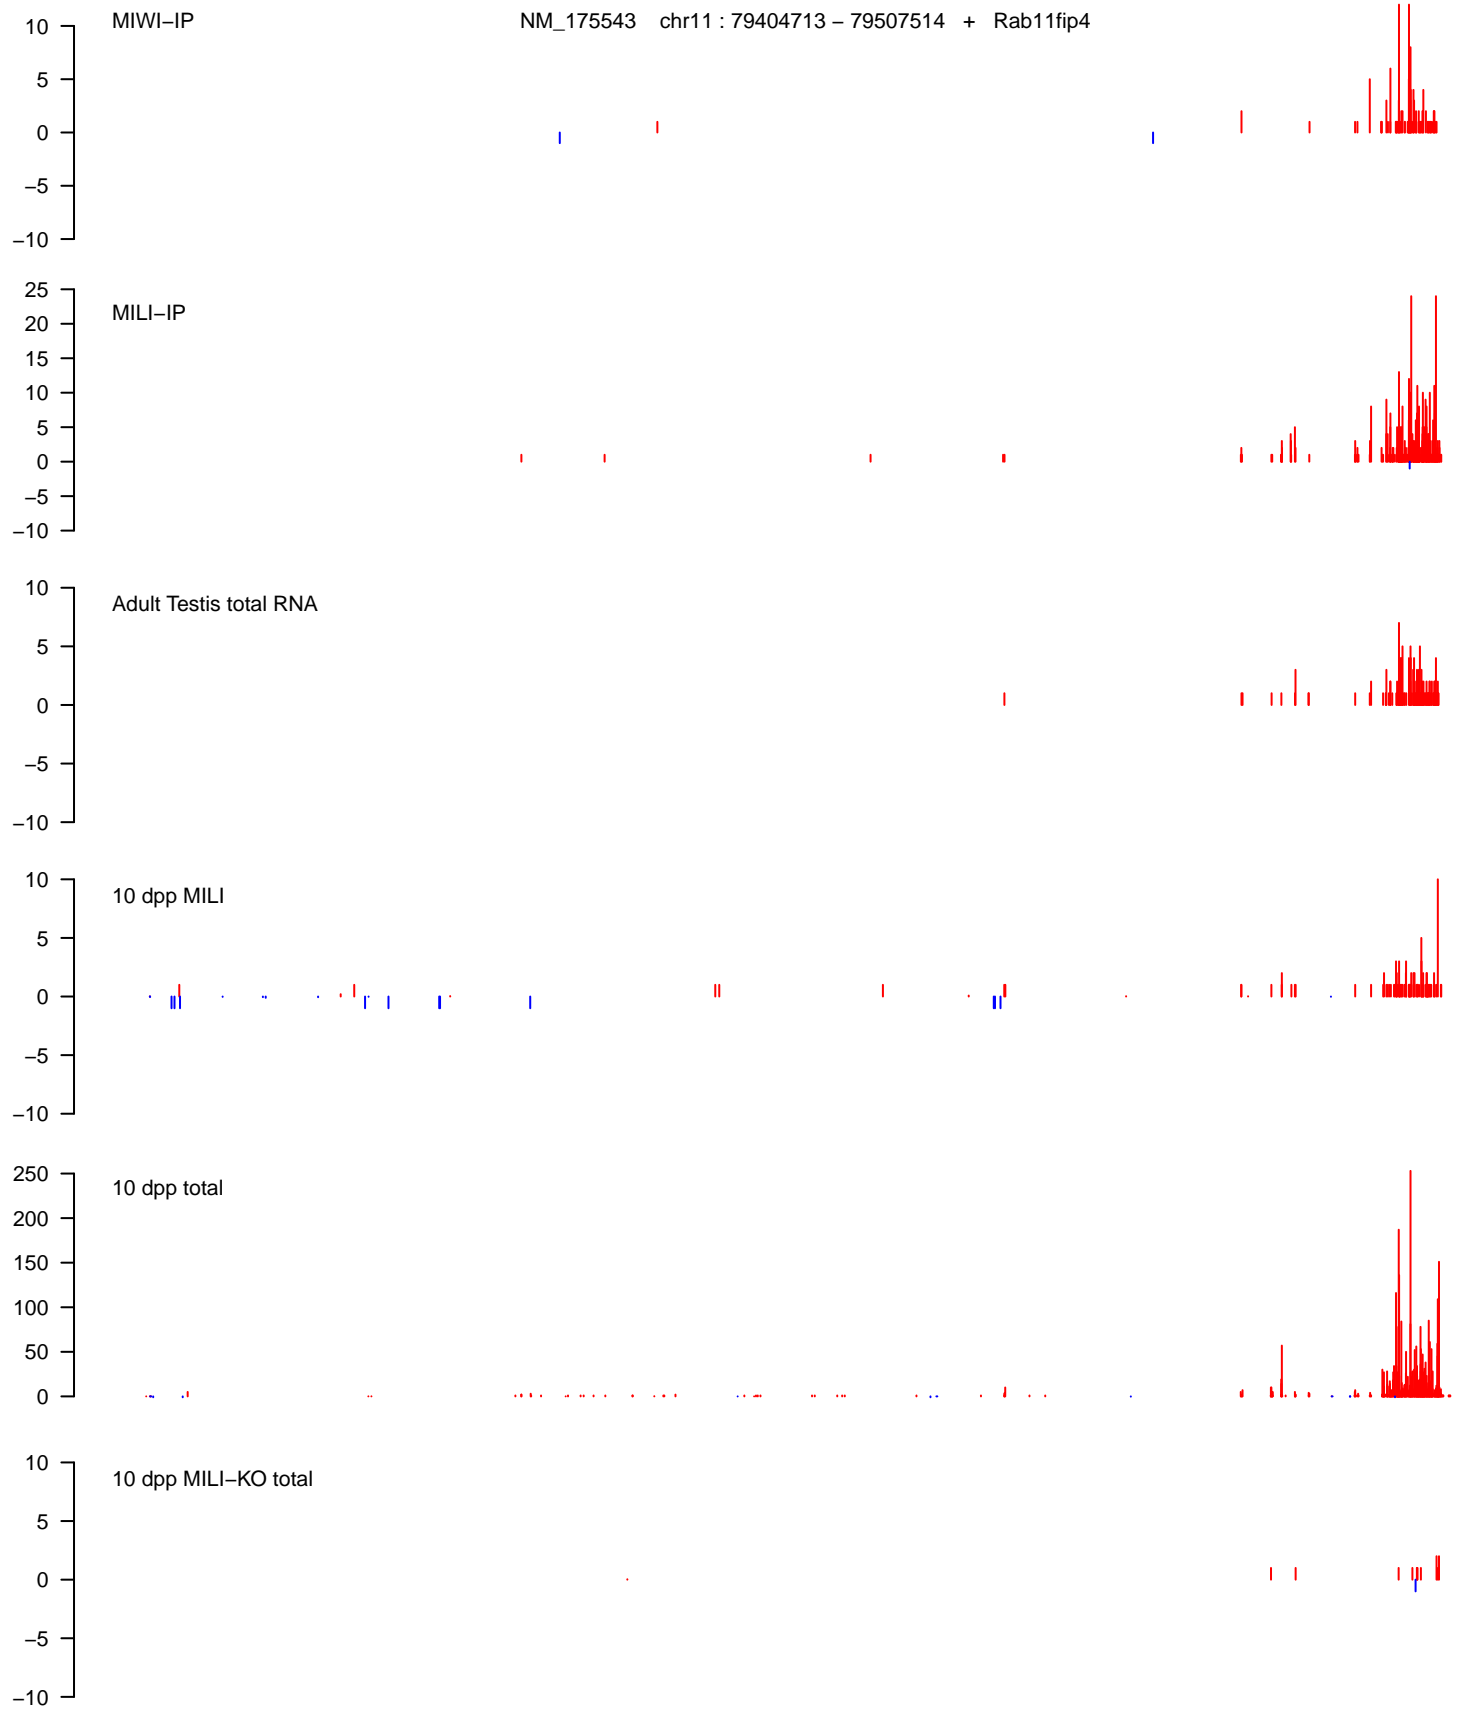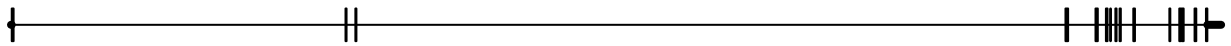

NM\_175543 chr11 79404713 79507514 + Rab11fip4

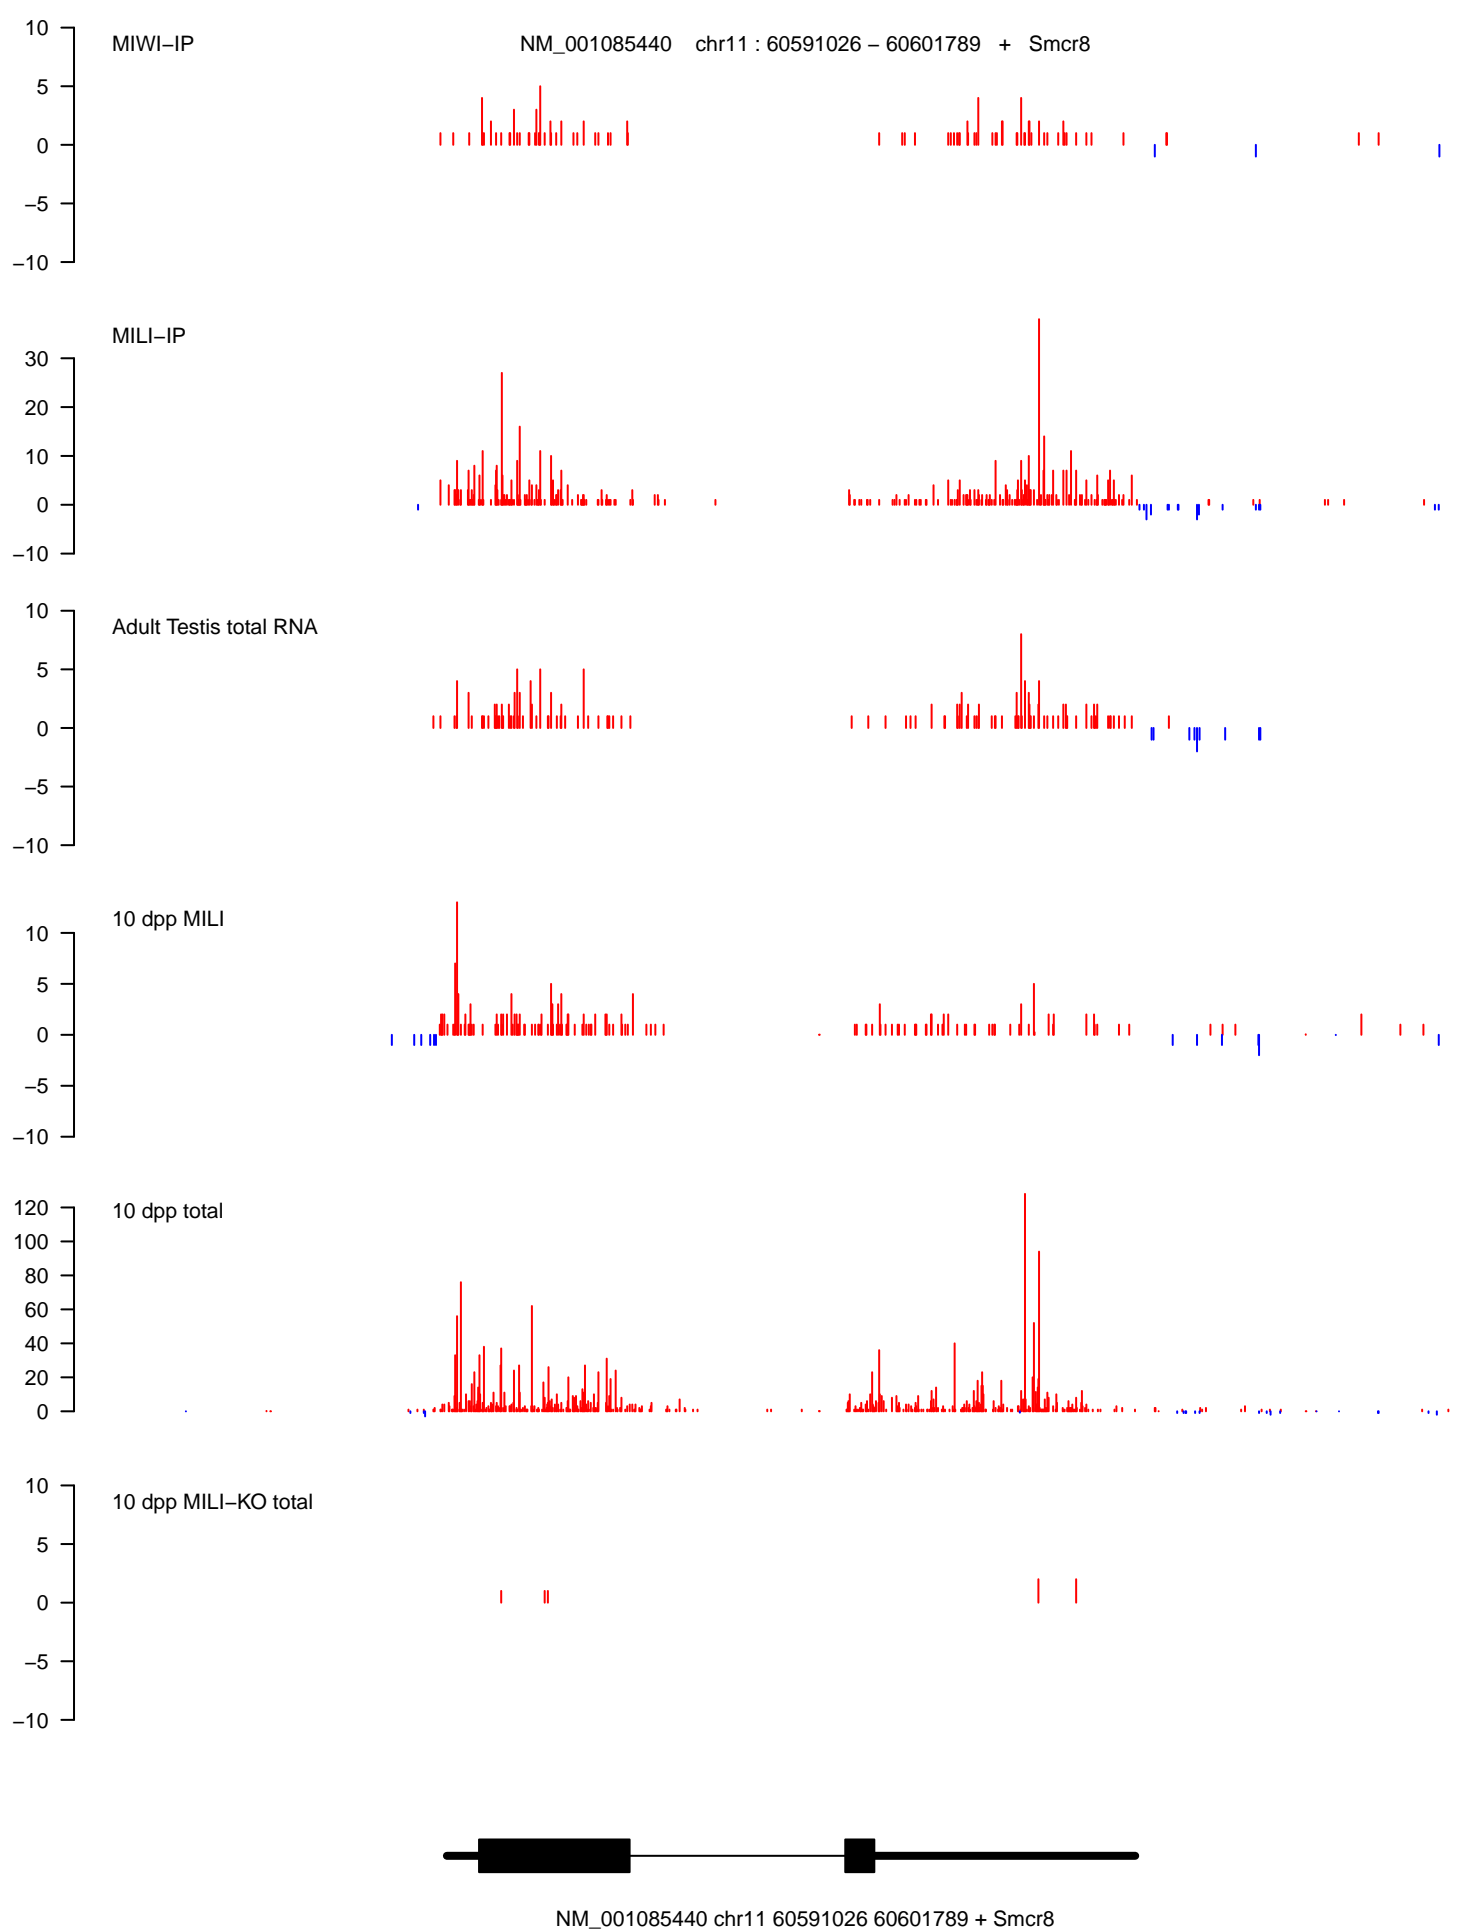

NM\_010239 chr19:10057192 - 10059582 + Fth1

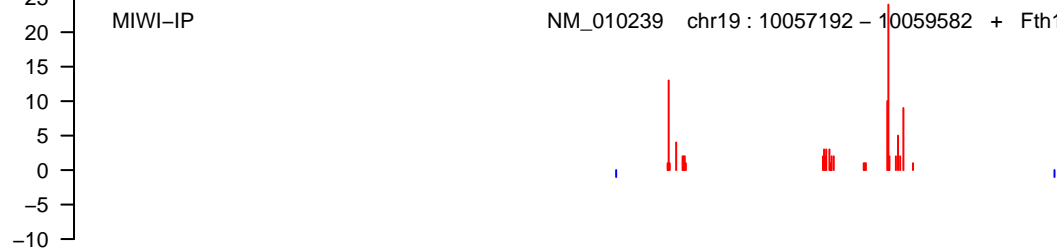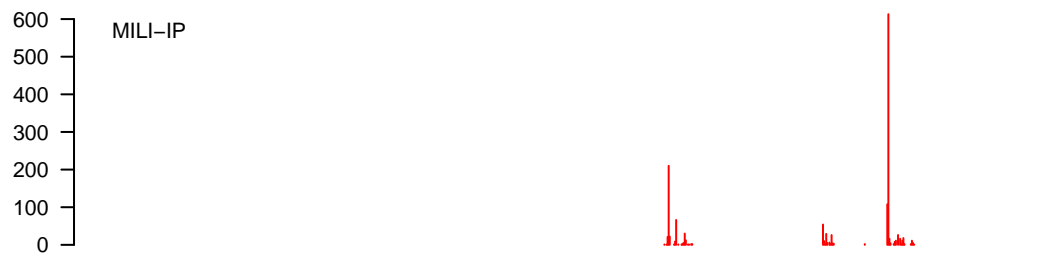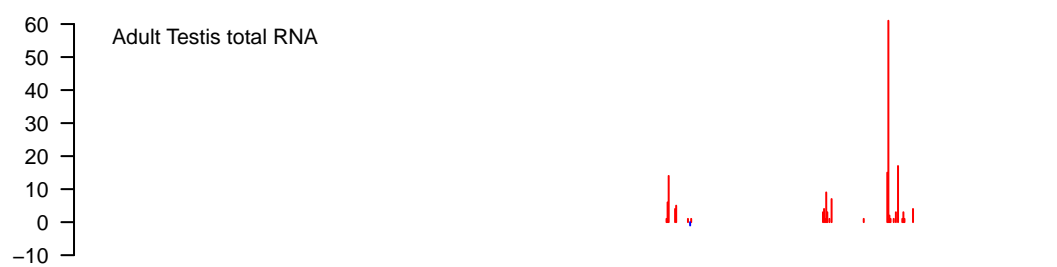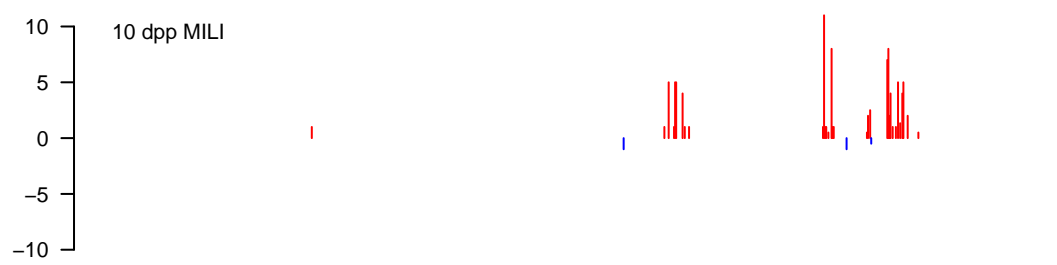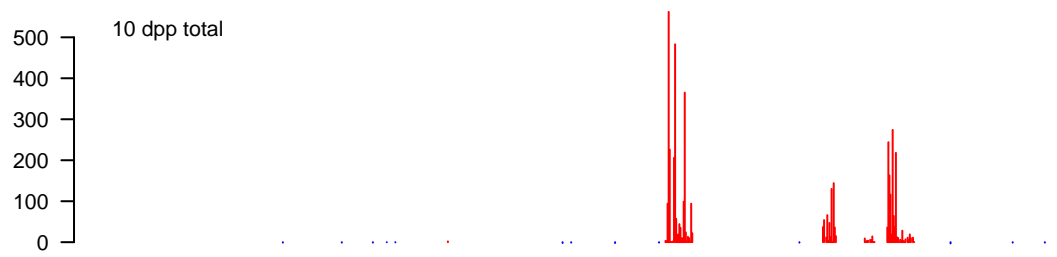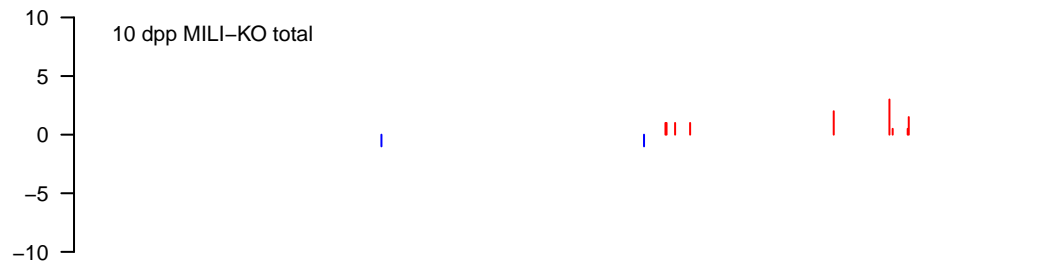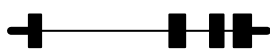

NM\_010239 chr19:10057192 - 10059582 + Fth1

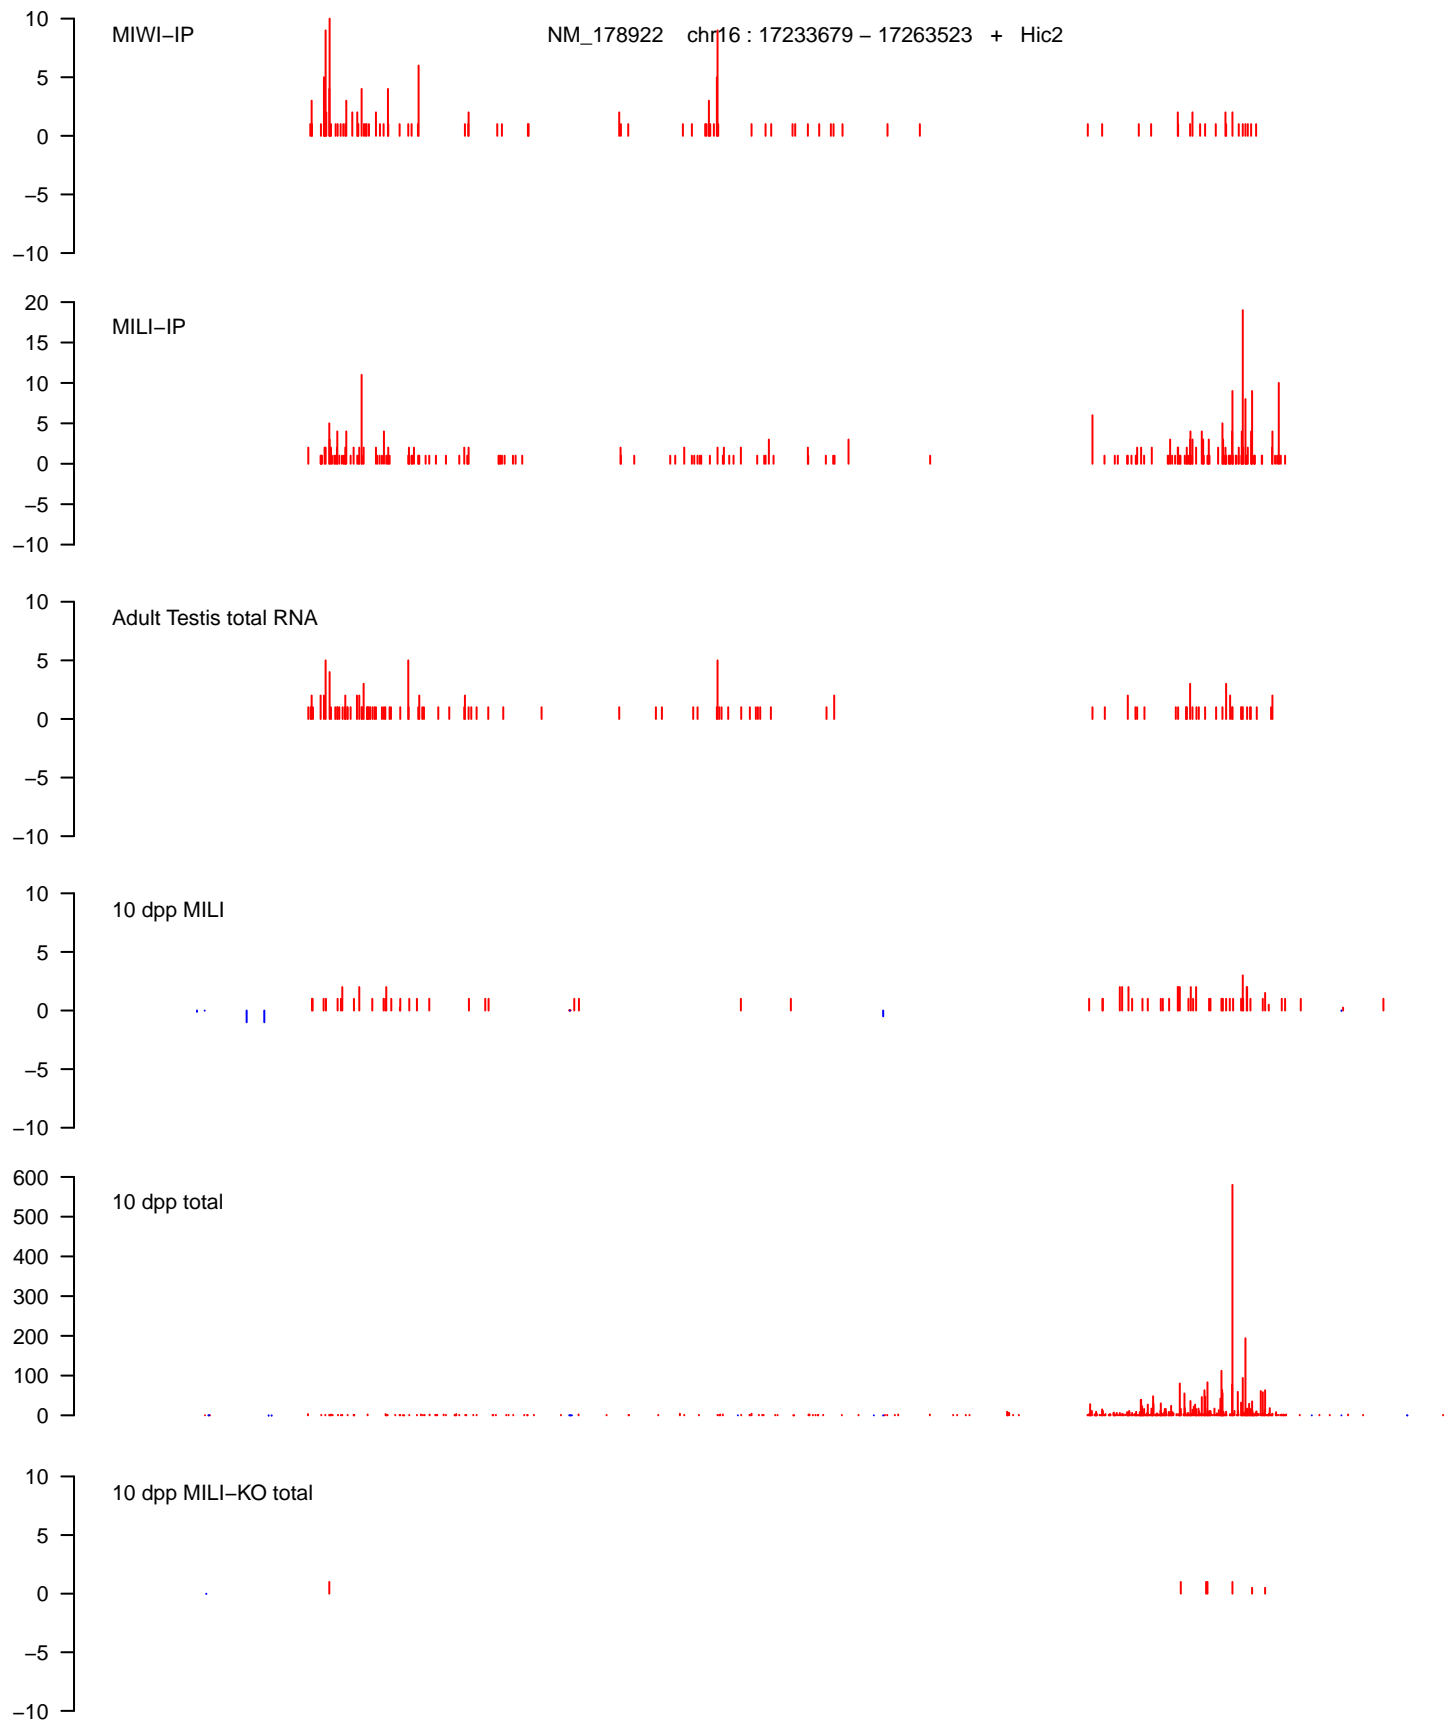

NM\_178922 chr16 : 17233679 - 17263523 + Hic2

NM\_178922 chr16 17233679 17263523 + Hic2

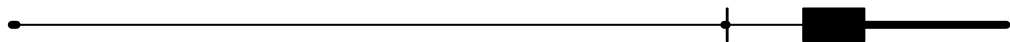

NM\_175491 chr11 : 60591529 – 60594569 + Smcr8



MIWI-IP

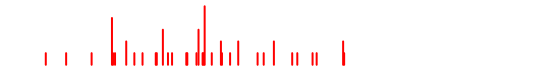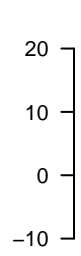

MILI-IP

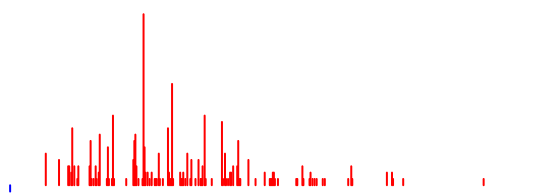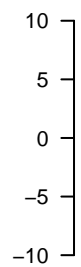

Adult Testis total RNA

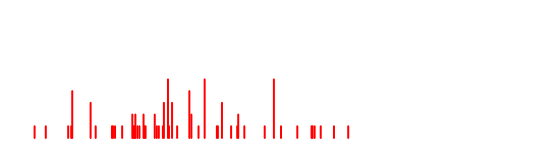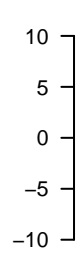

10 dpp MILI

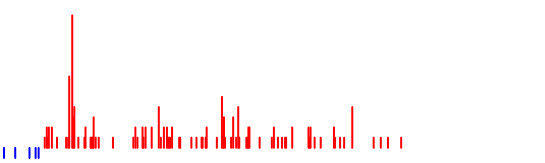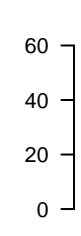

10 dpp total

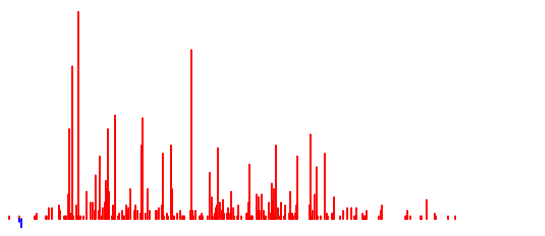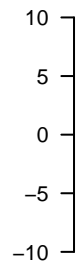

10 dpp MILI-KO total

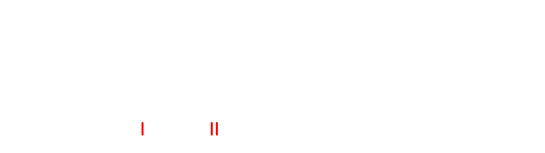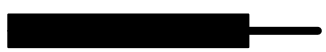

NM\_175491 chr11 60591529 60594569 + Smcr8

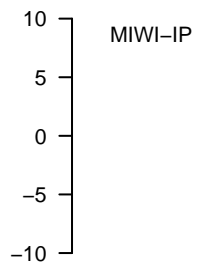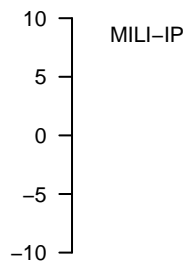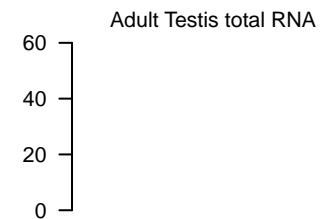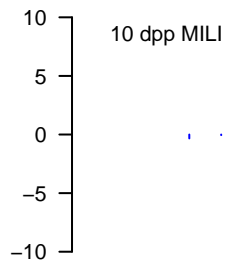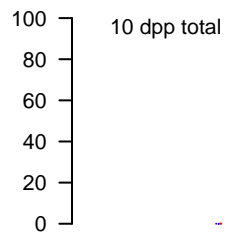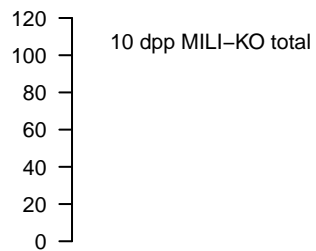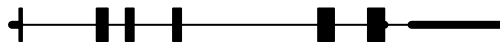

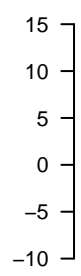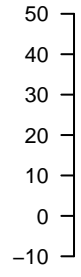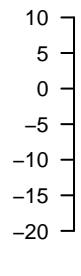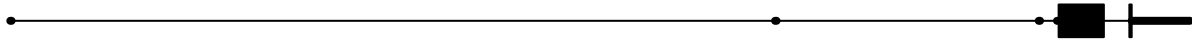

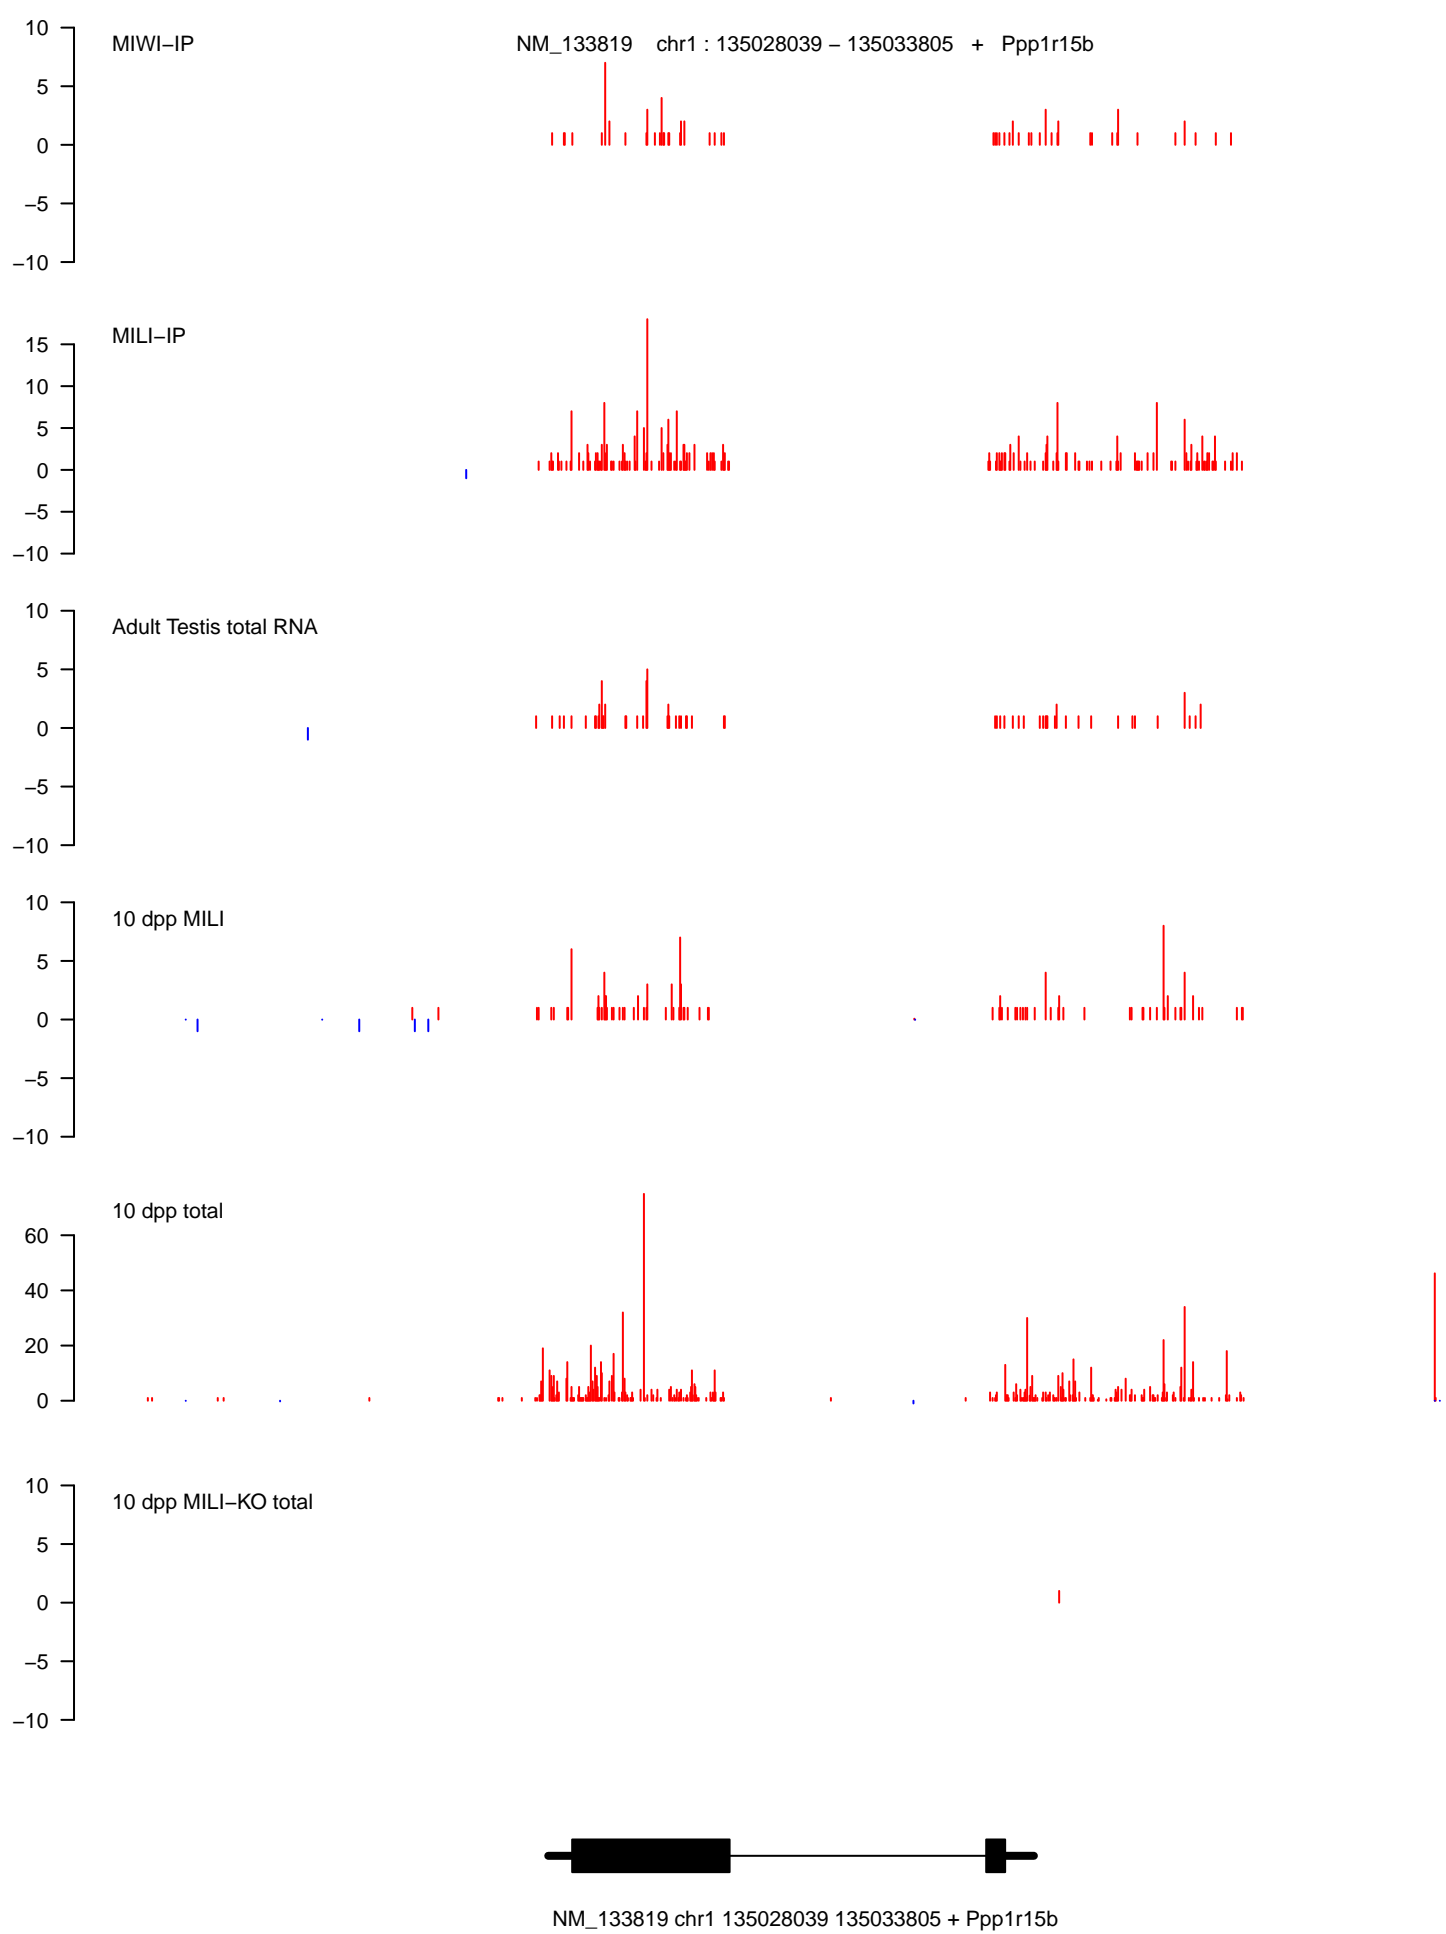

NM\_133819 chr1 135028039 135033805 + Ppp1r15b



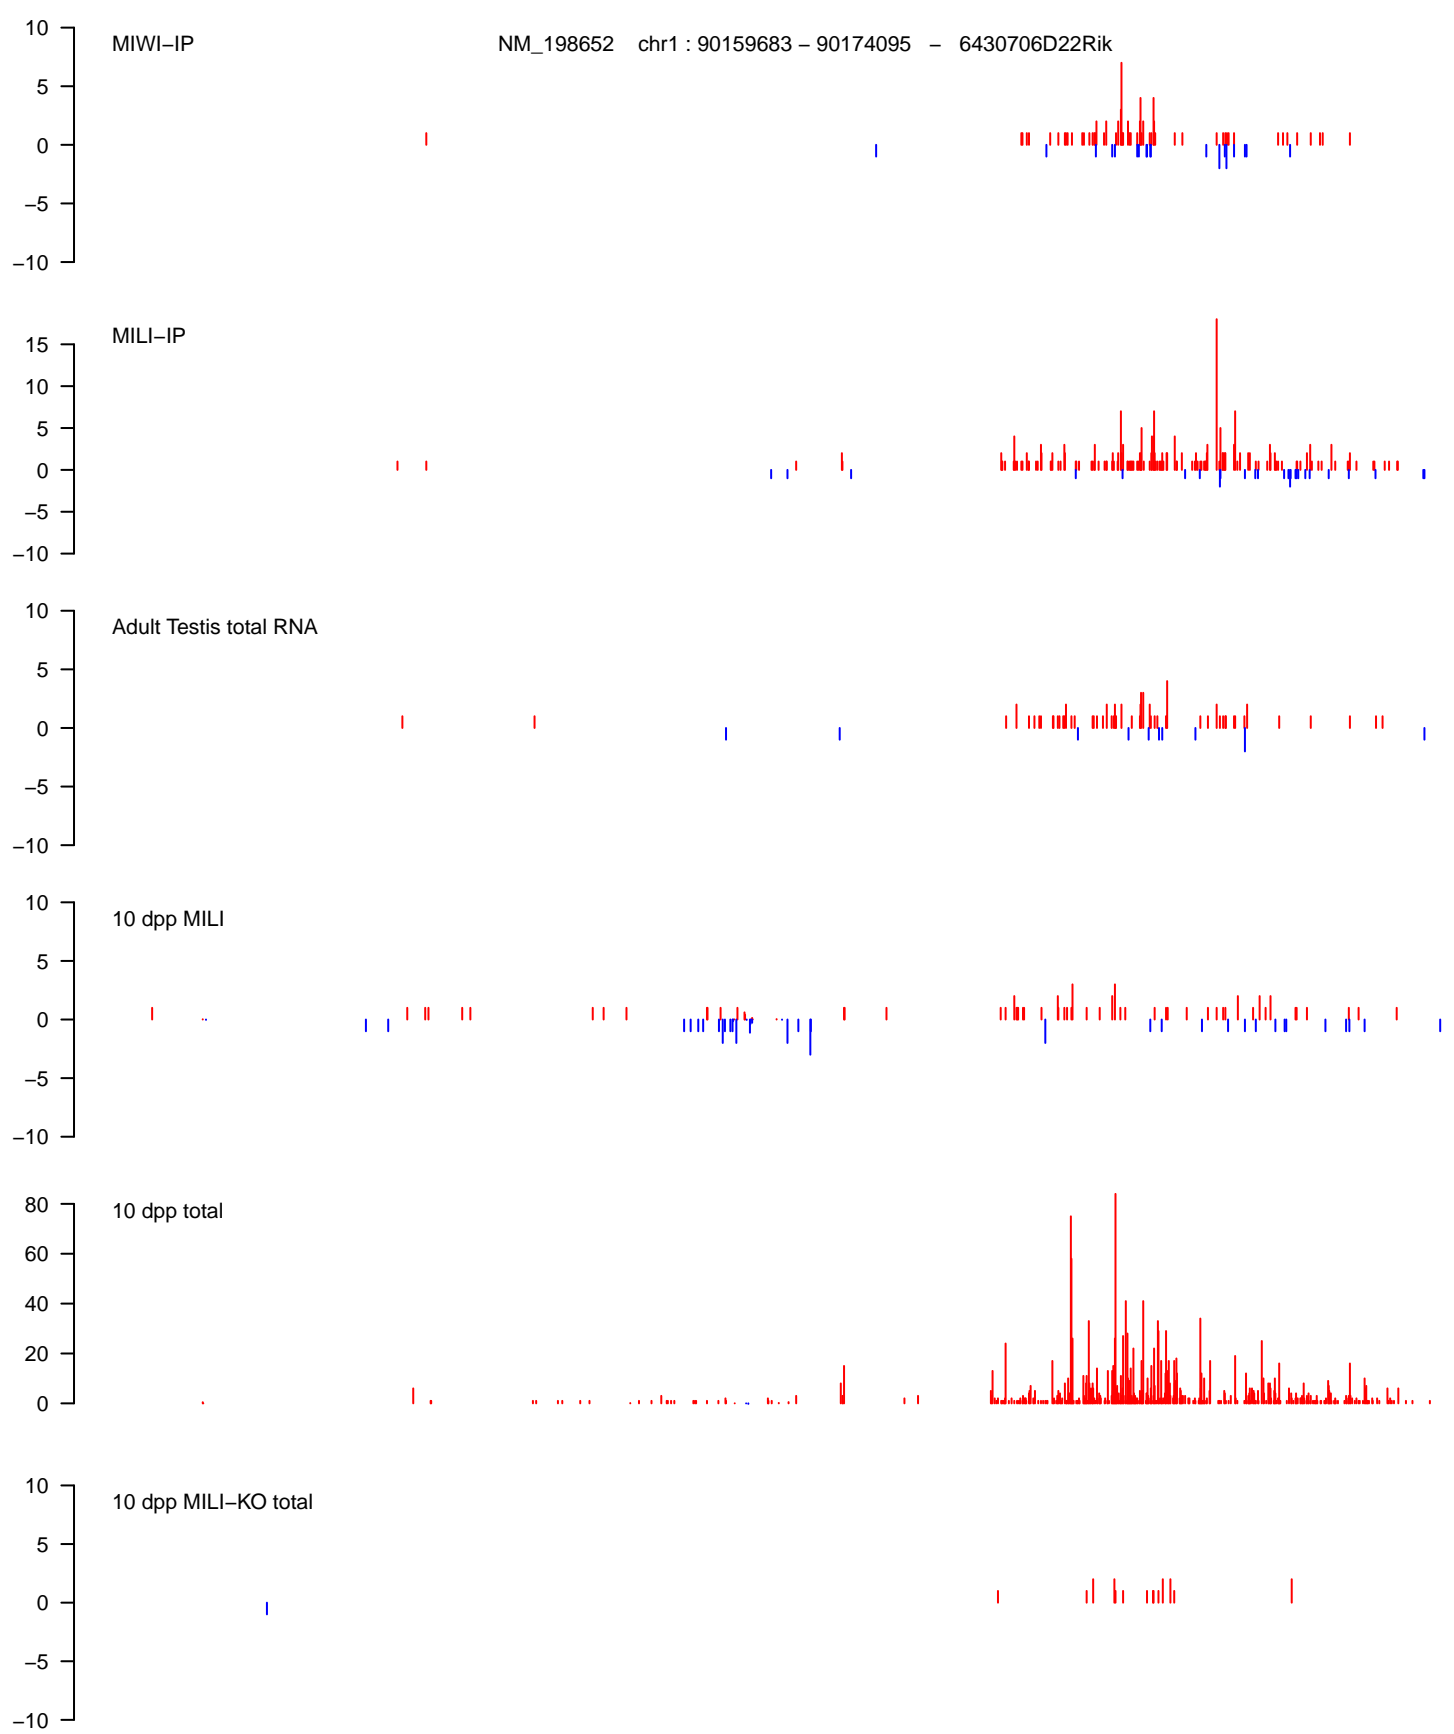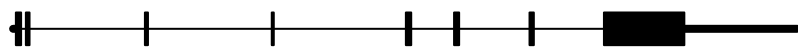

NM\_198652 chr1 90159683 90174095 - 643070622Rik

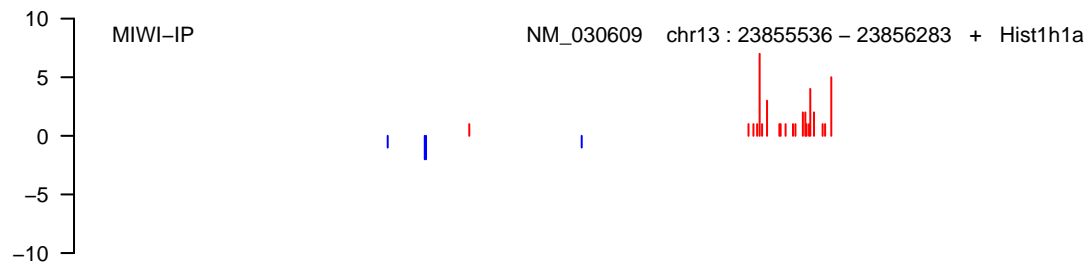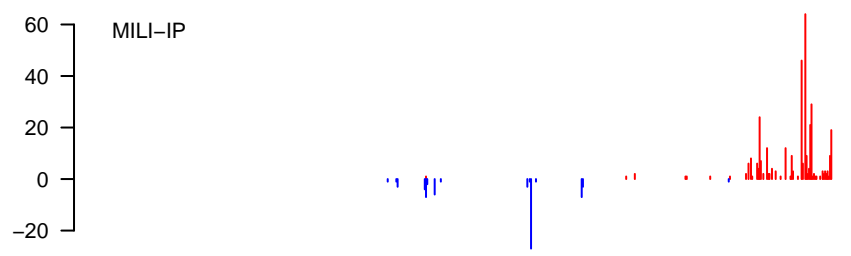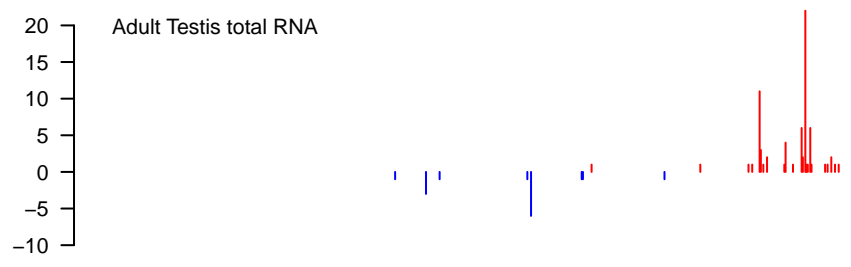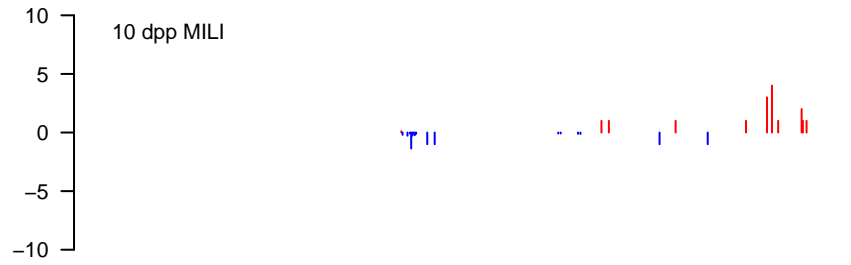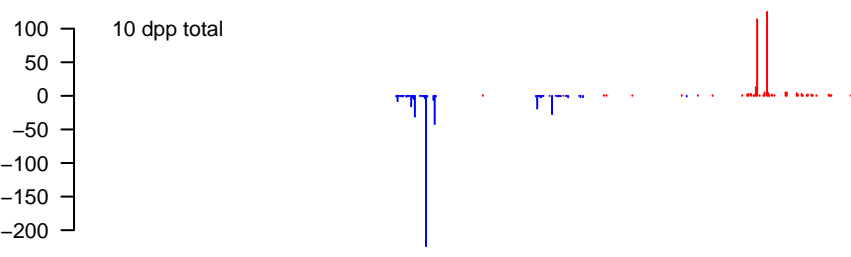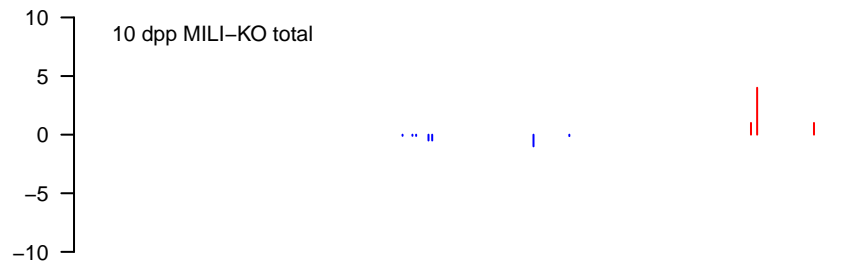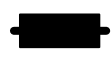

NM\_030609 chr13 23855536 23856283 + Hist1h1a

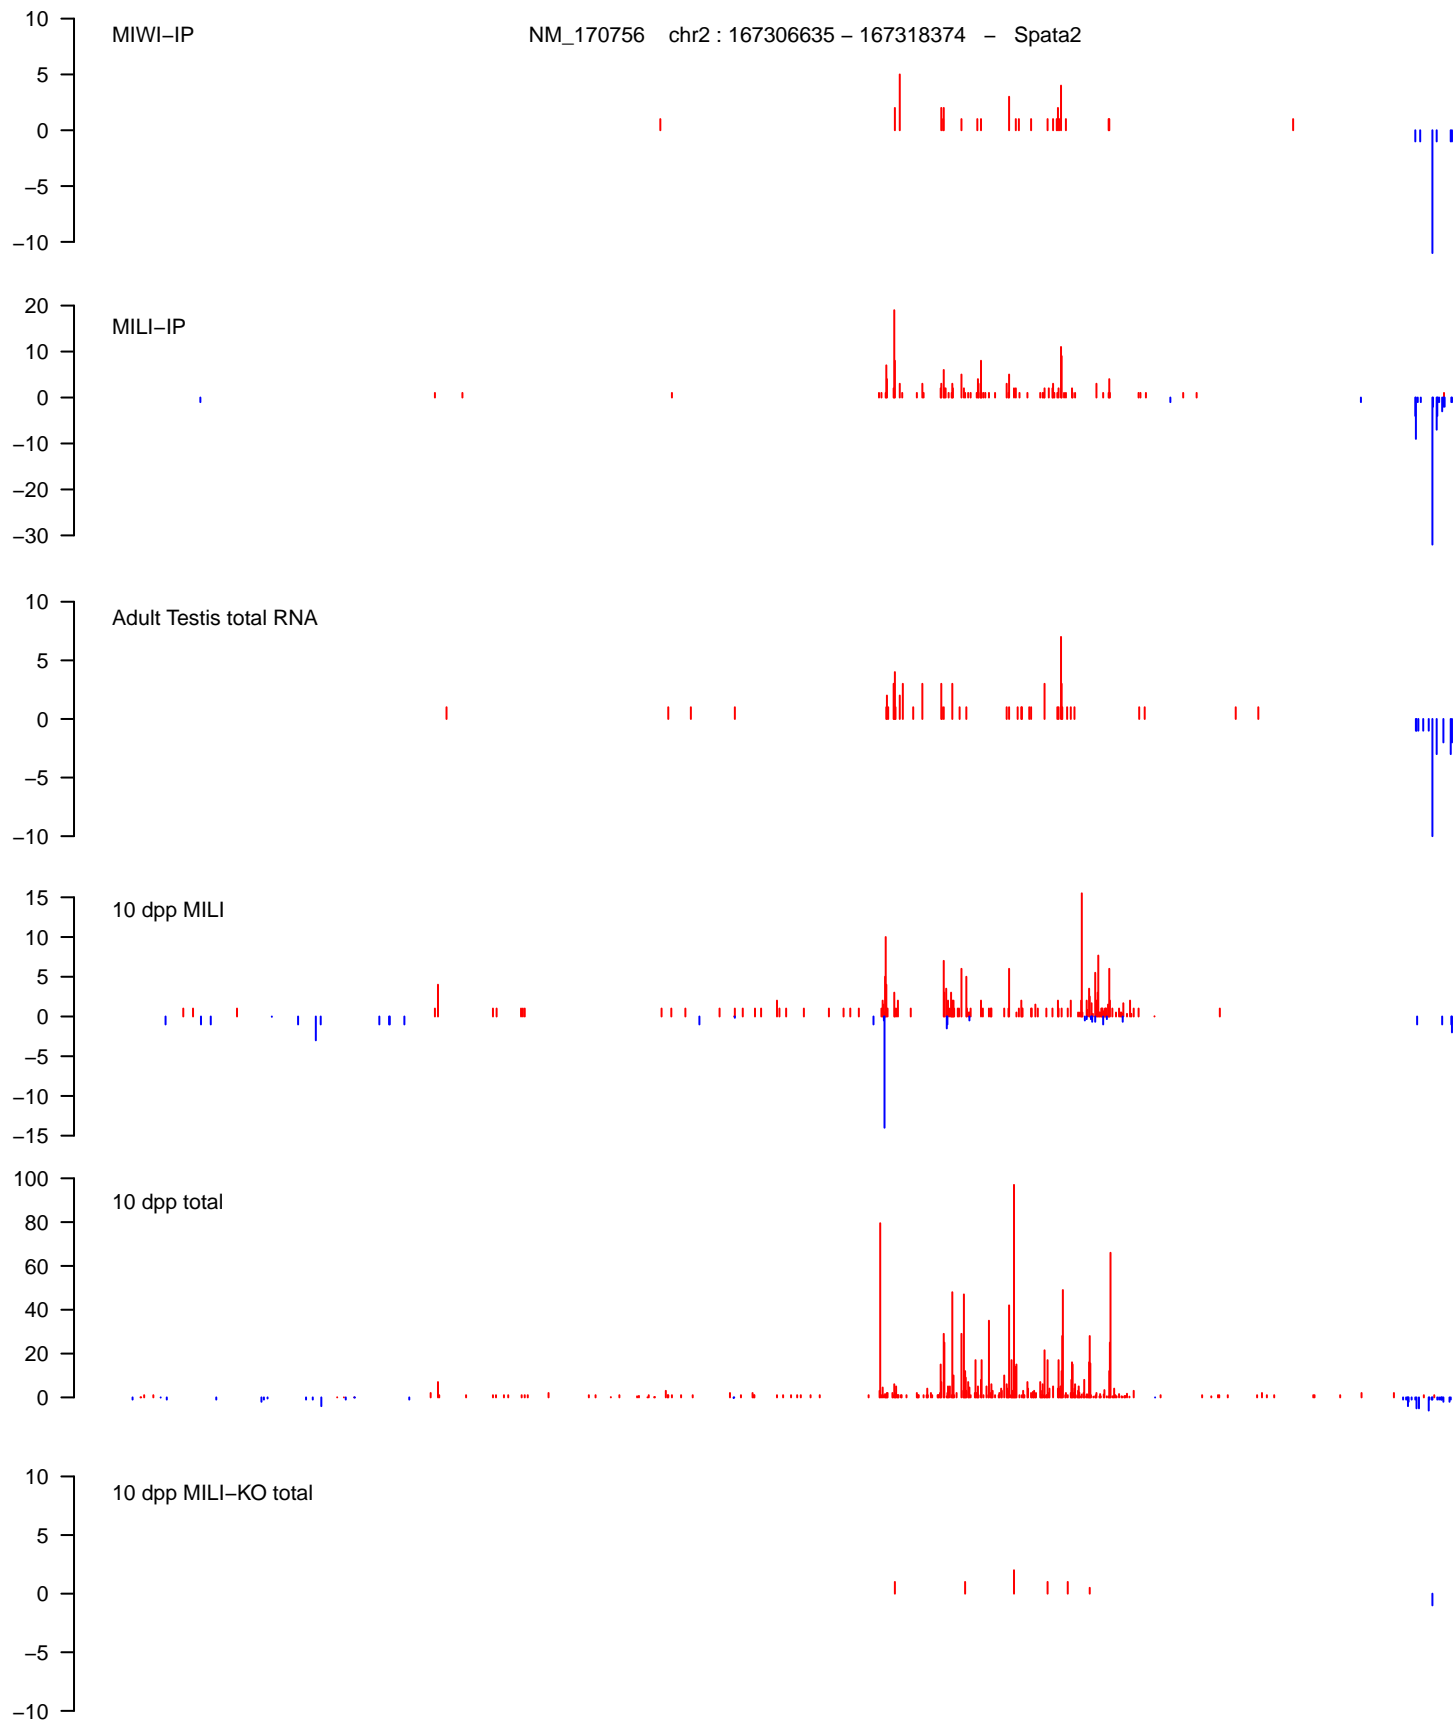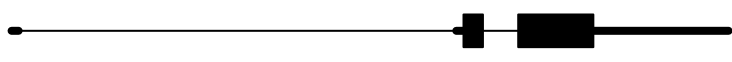

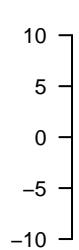

MIWI-IP

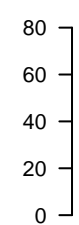

MILI-IP

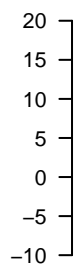

Adult Testis total RNA

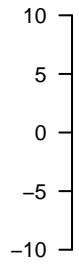

10 dpp MILI

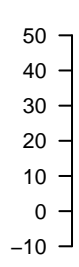

10 dpp total

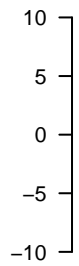

10 dpp MILI-KO total

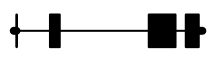

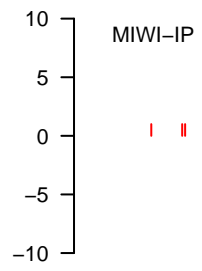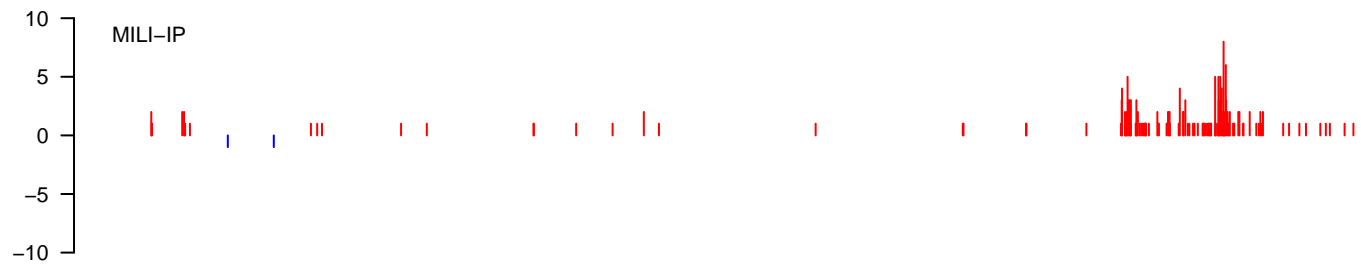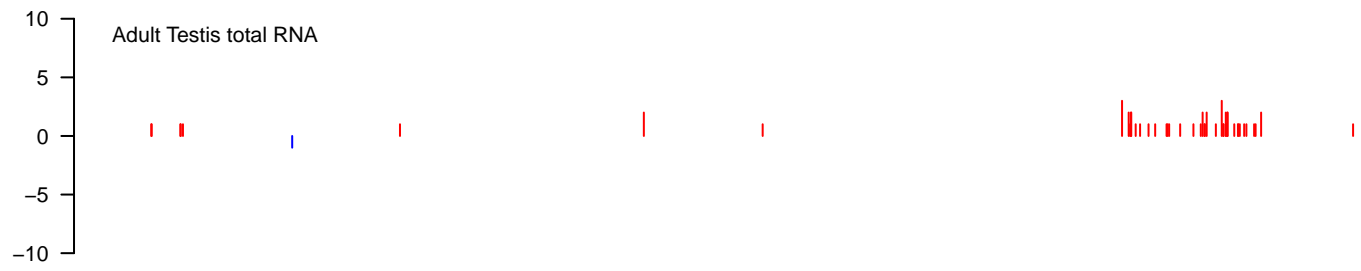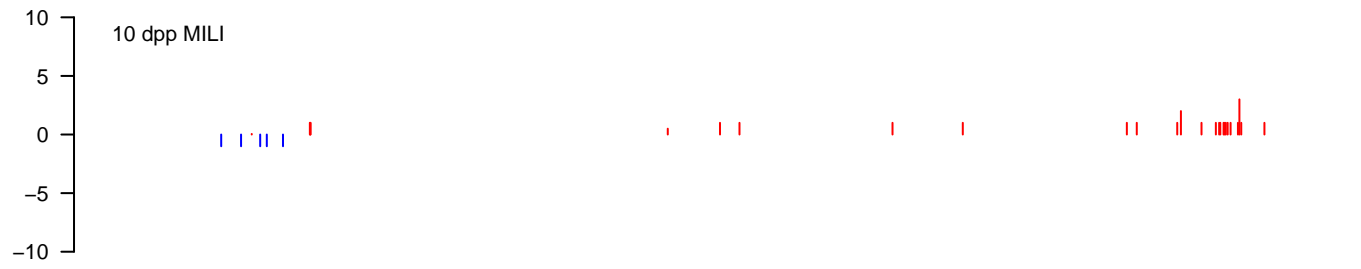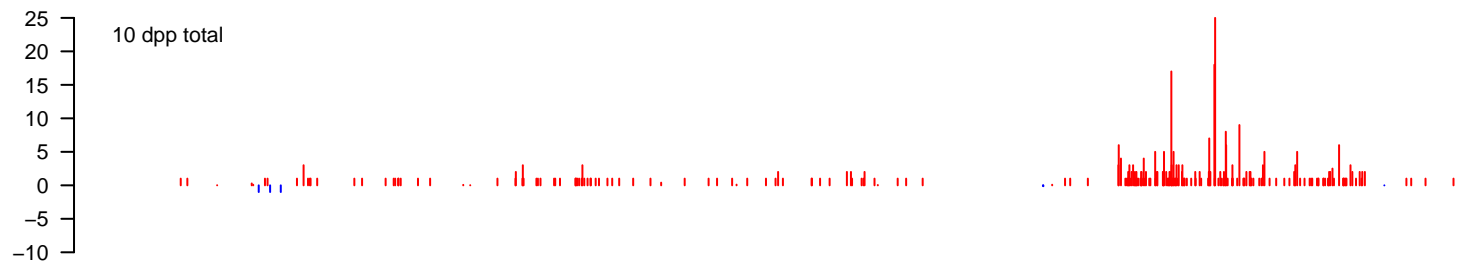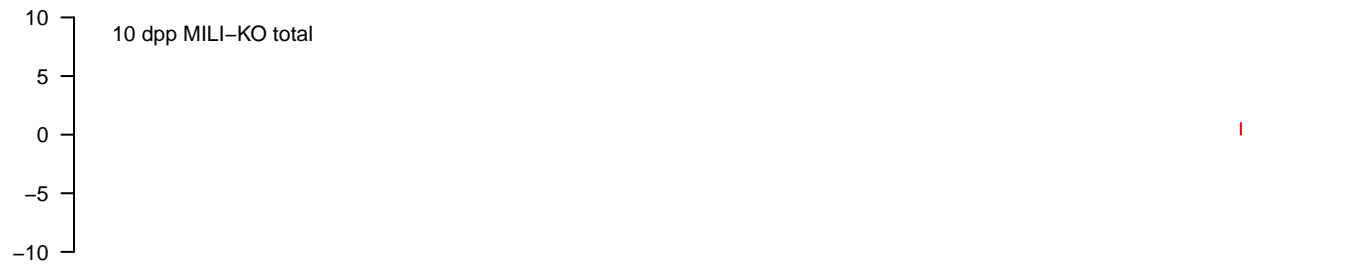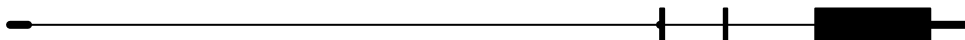

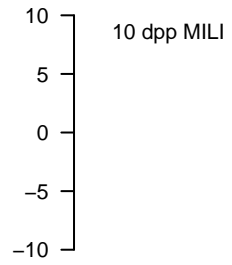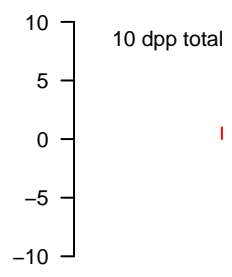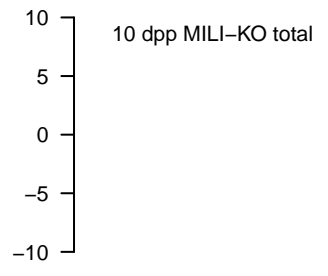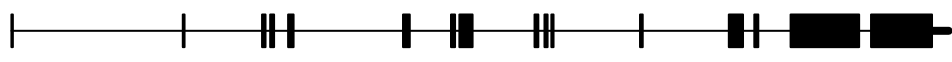

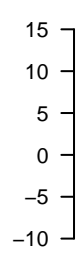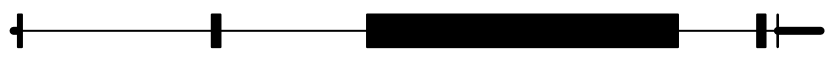

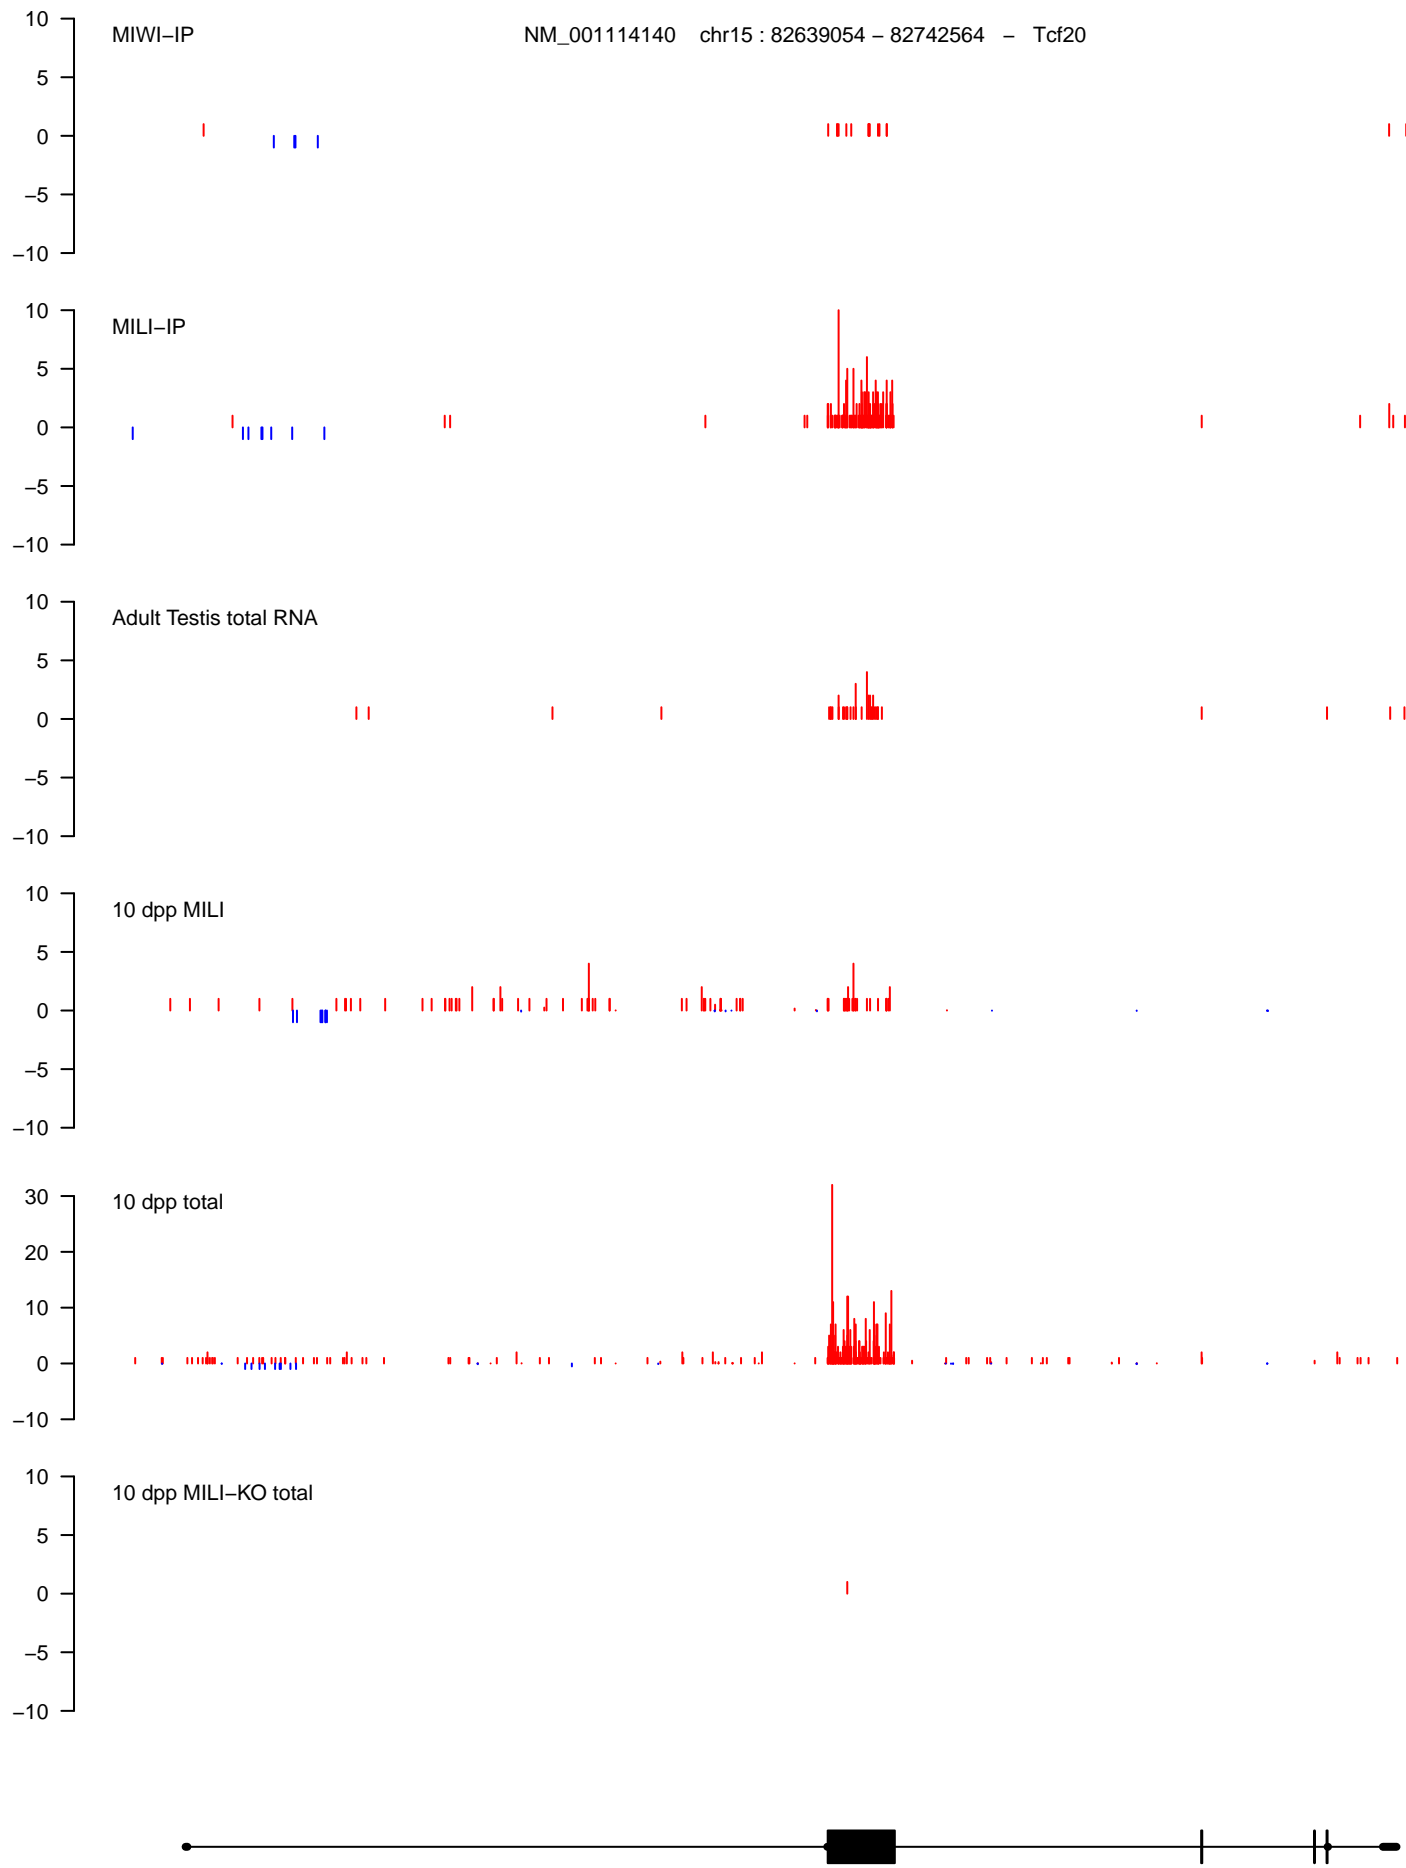



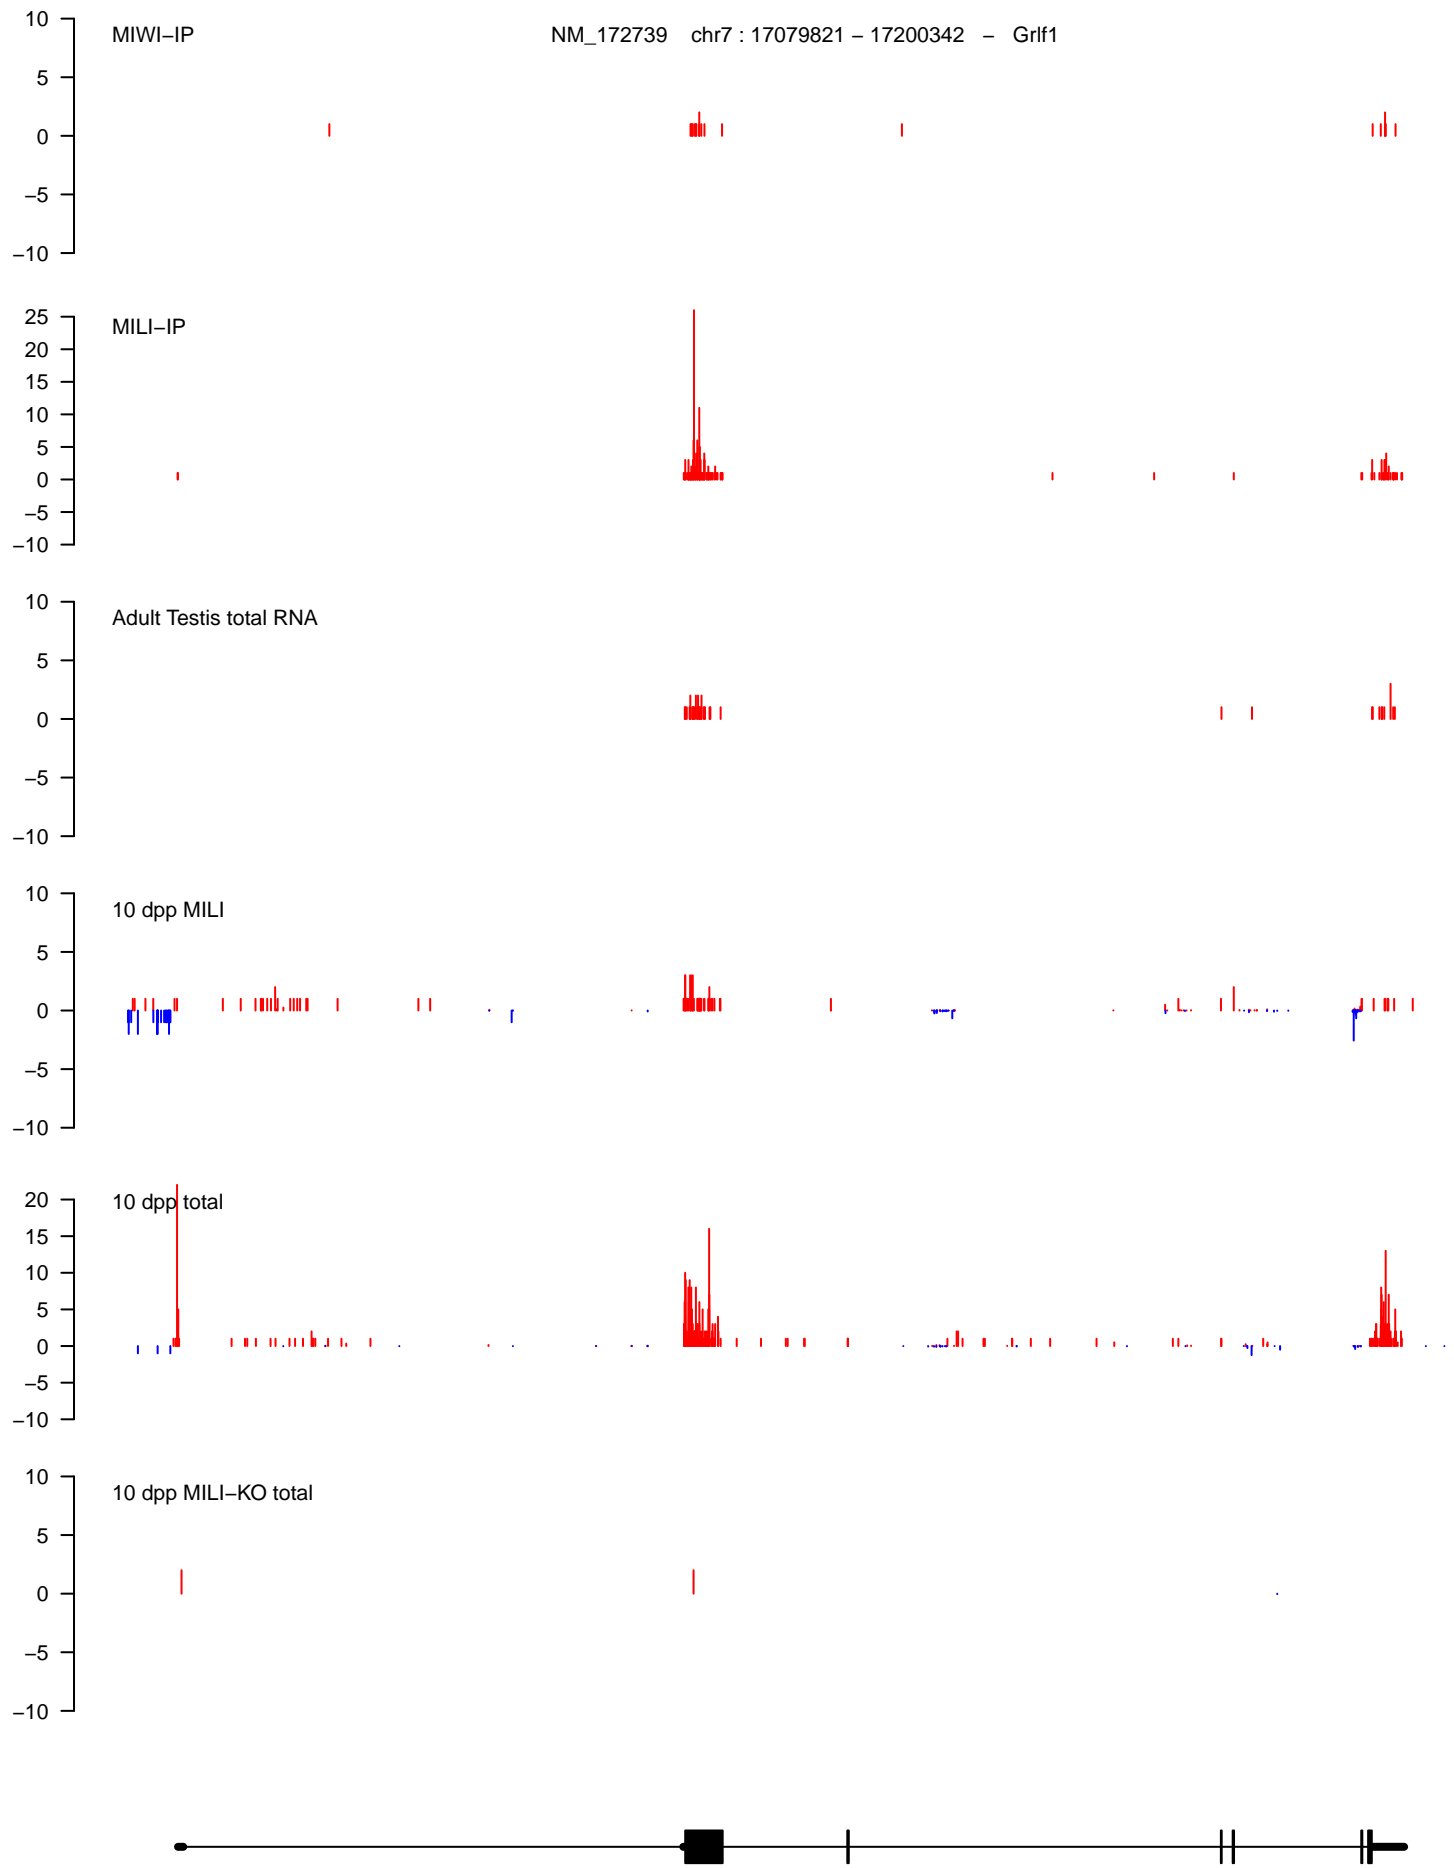

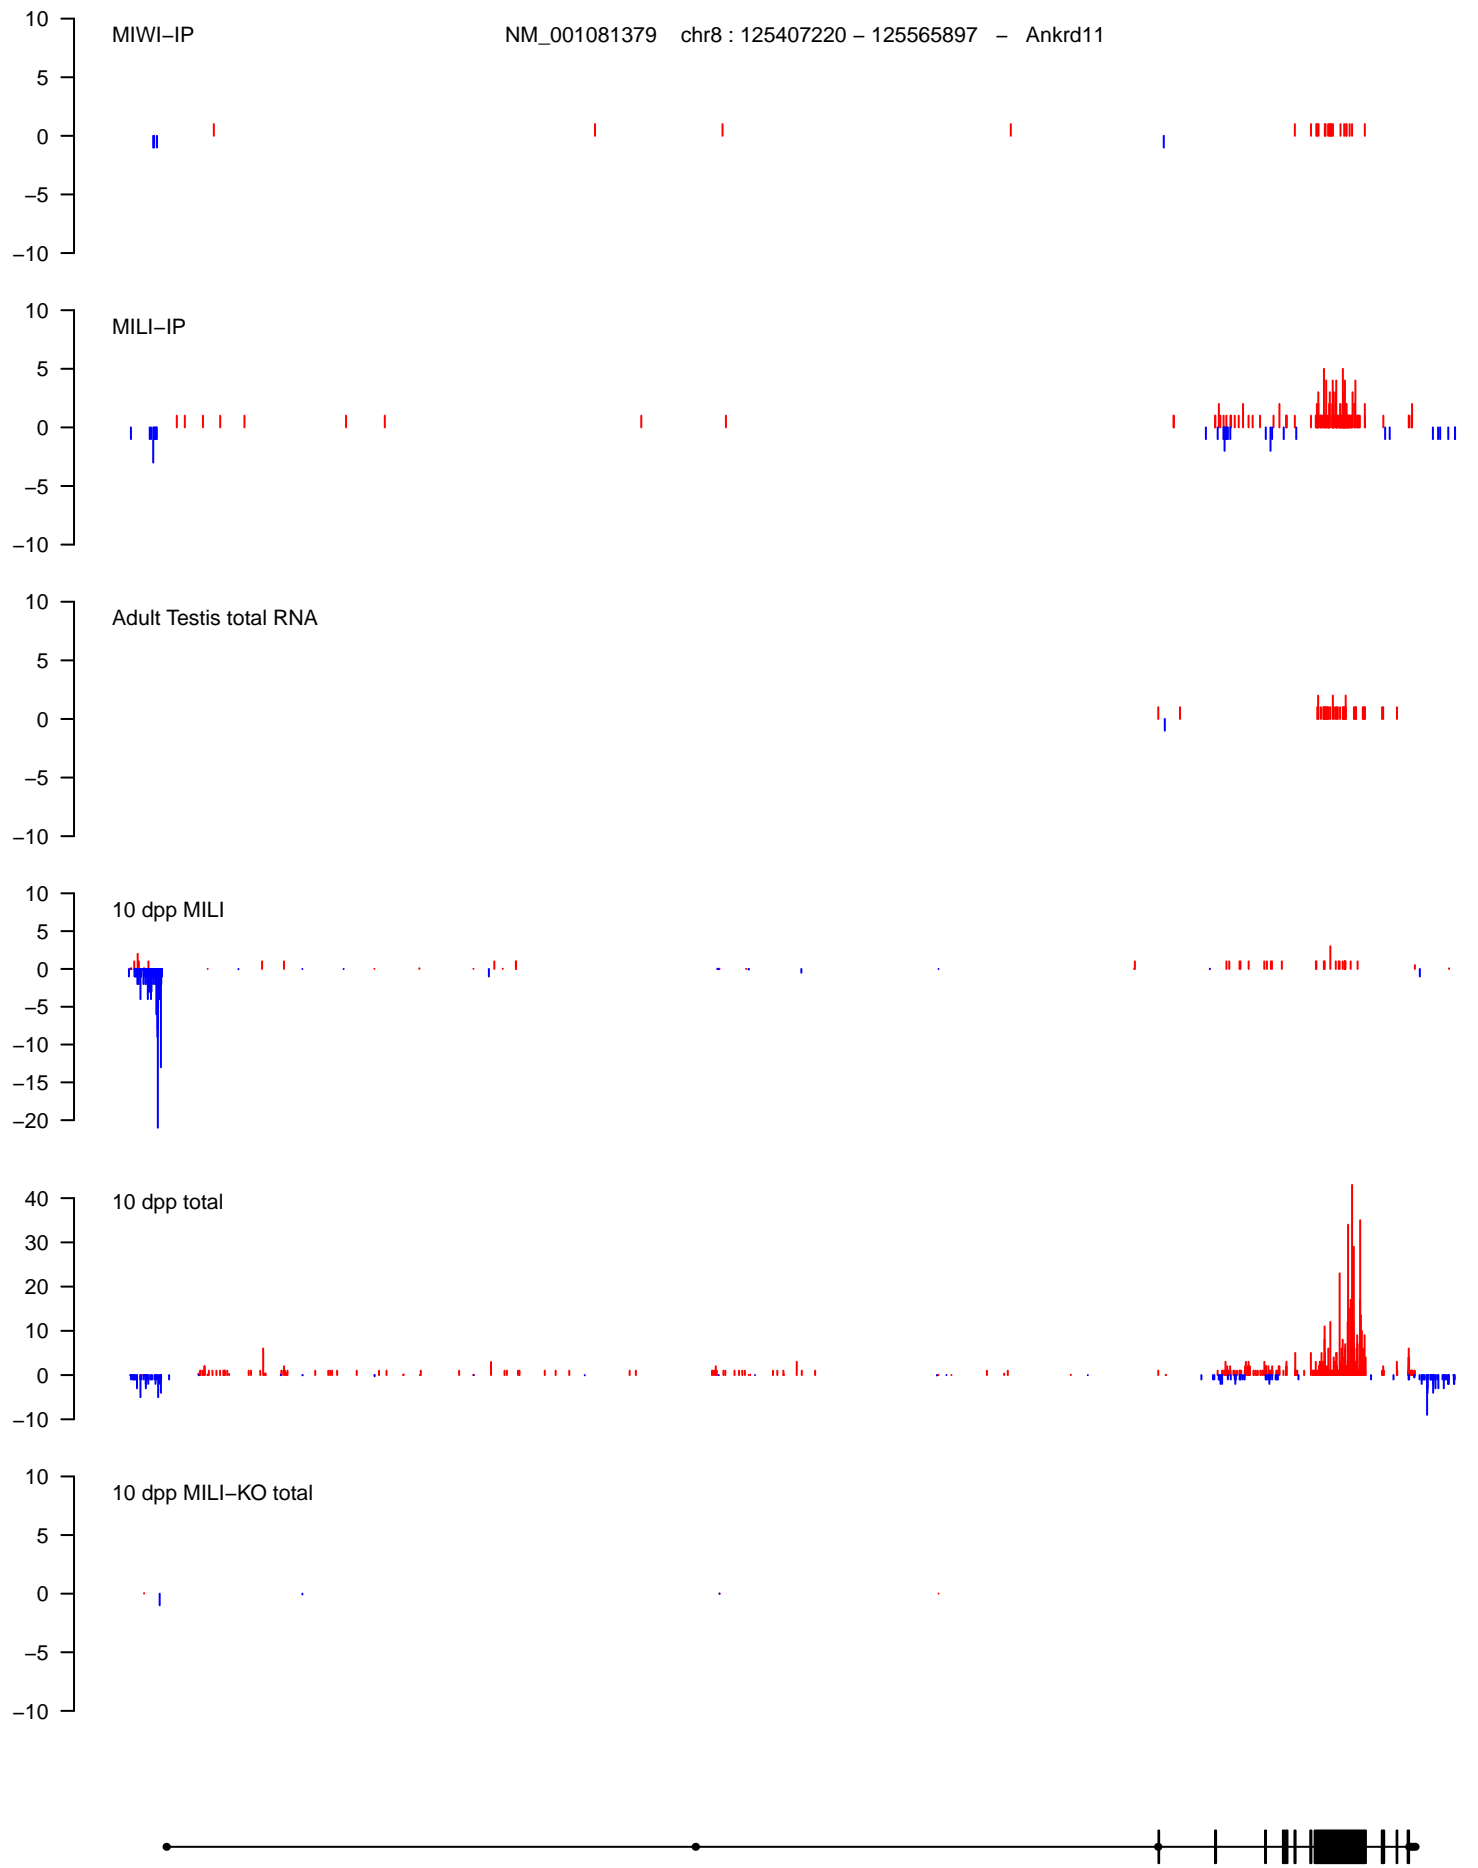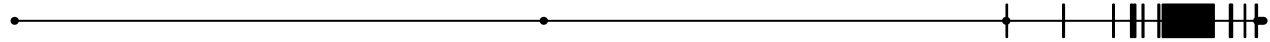

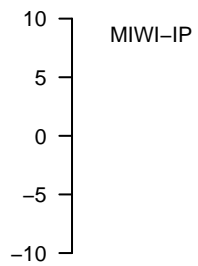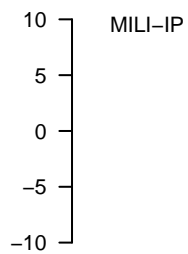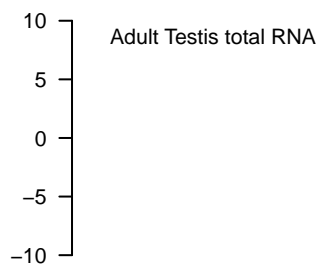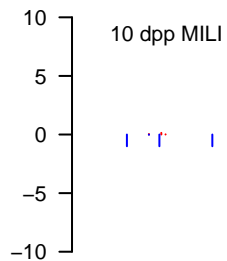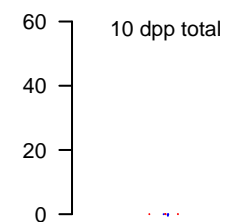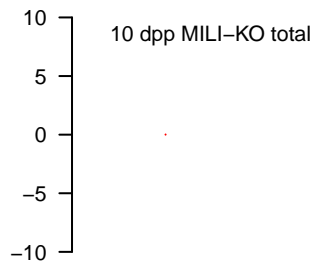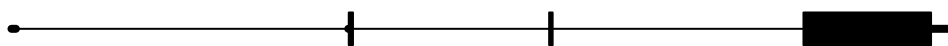

NM\_001009949 chr4 : 45408795 – 45421633 – Mcart1

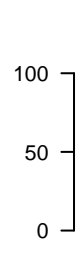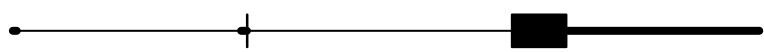

NM\_001009949 chr4 45408795 45421633 – Mcart1

NM\_009941 chr8 : 123192189 – 123198109 + Cox4i1

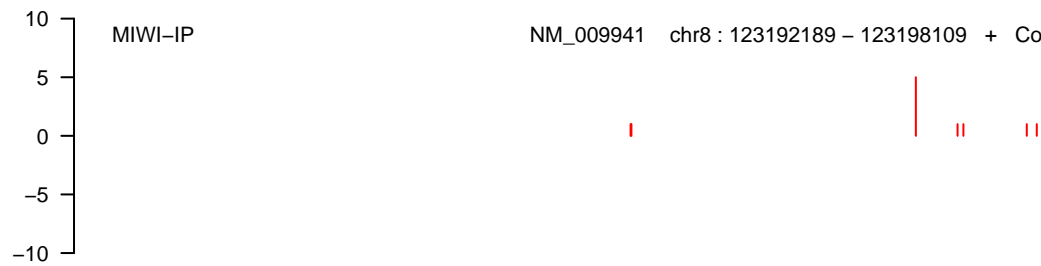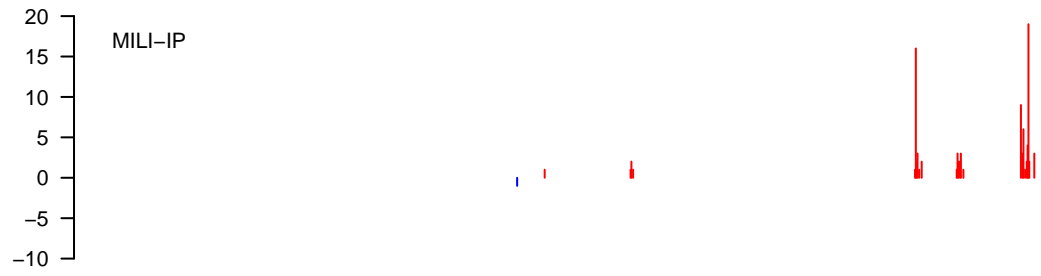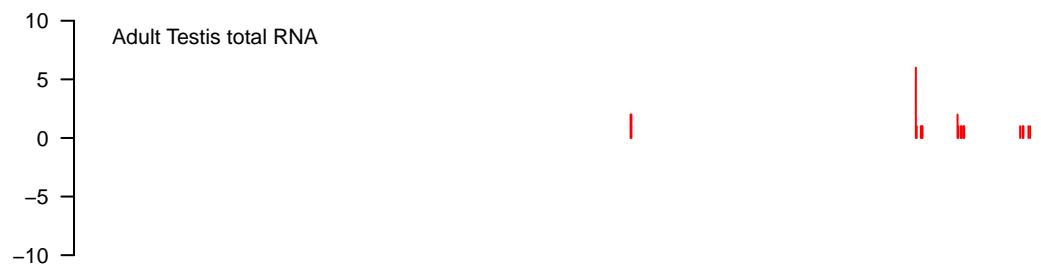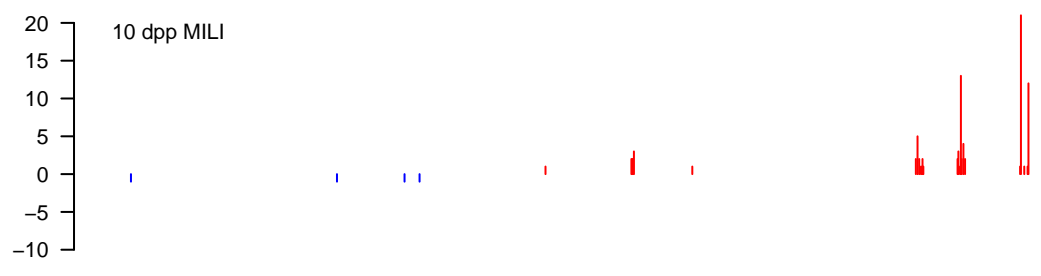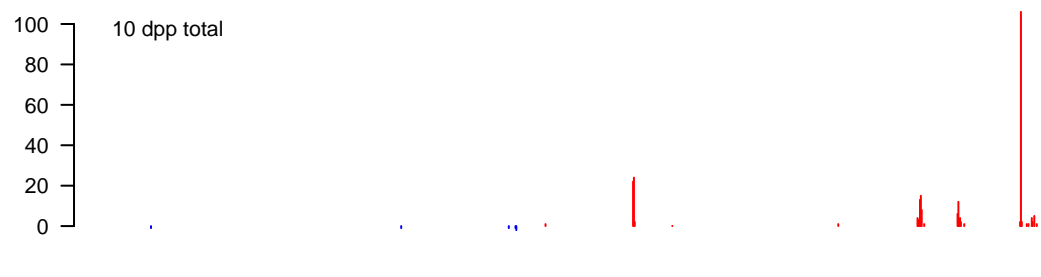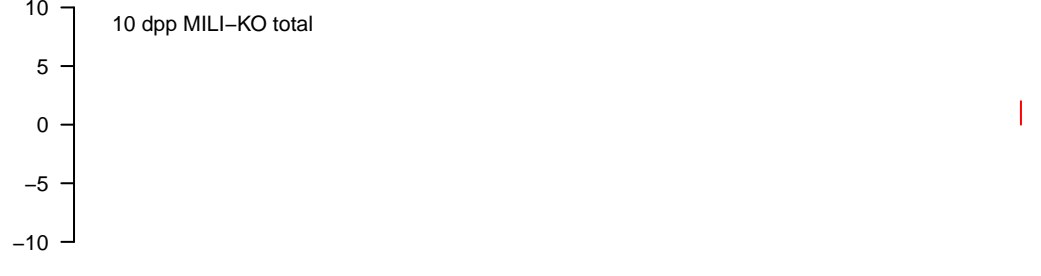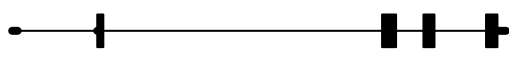

NM\_009941 chr8 123192189 123198109 + Cox4i1

NM\_028873 chr10:128242731 - 128256502 + Dnajc14

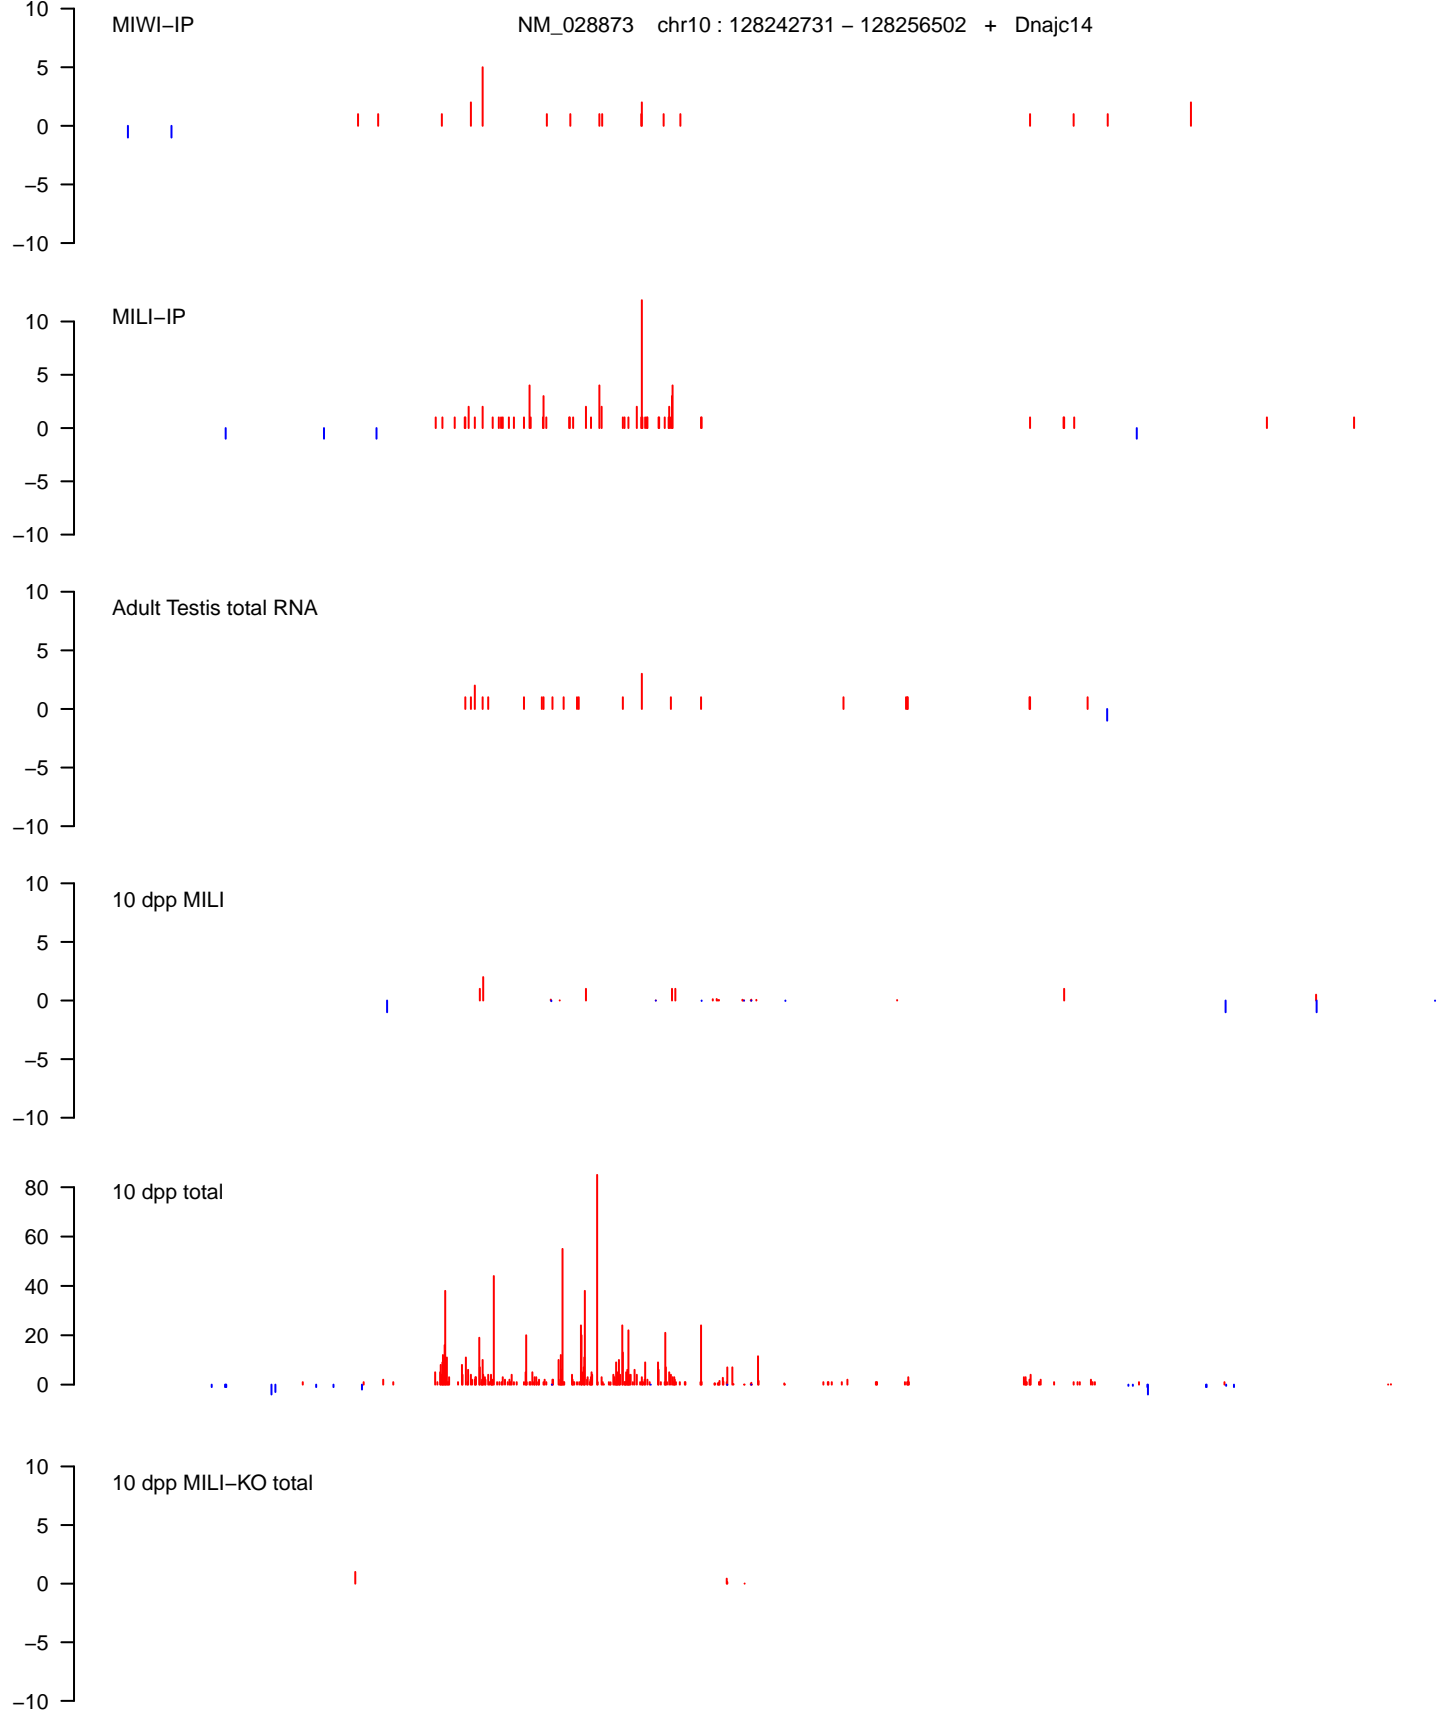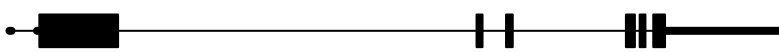

NM\_028873 chr10 128242731 128256502 + Dnajc14

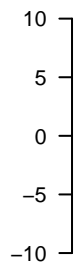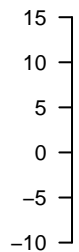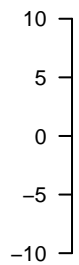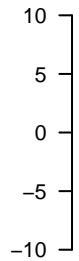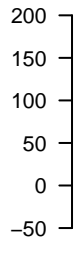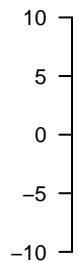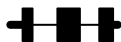

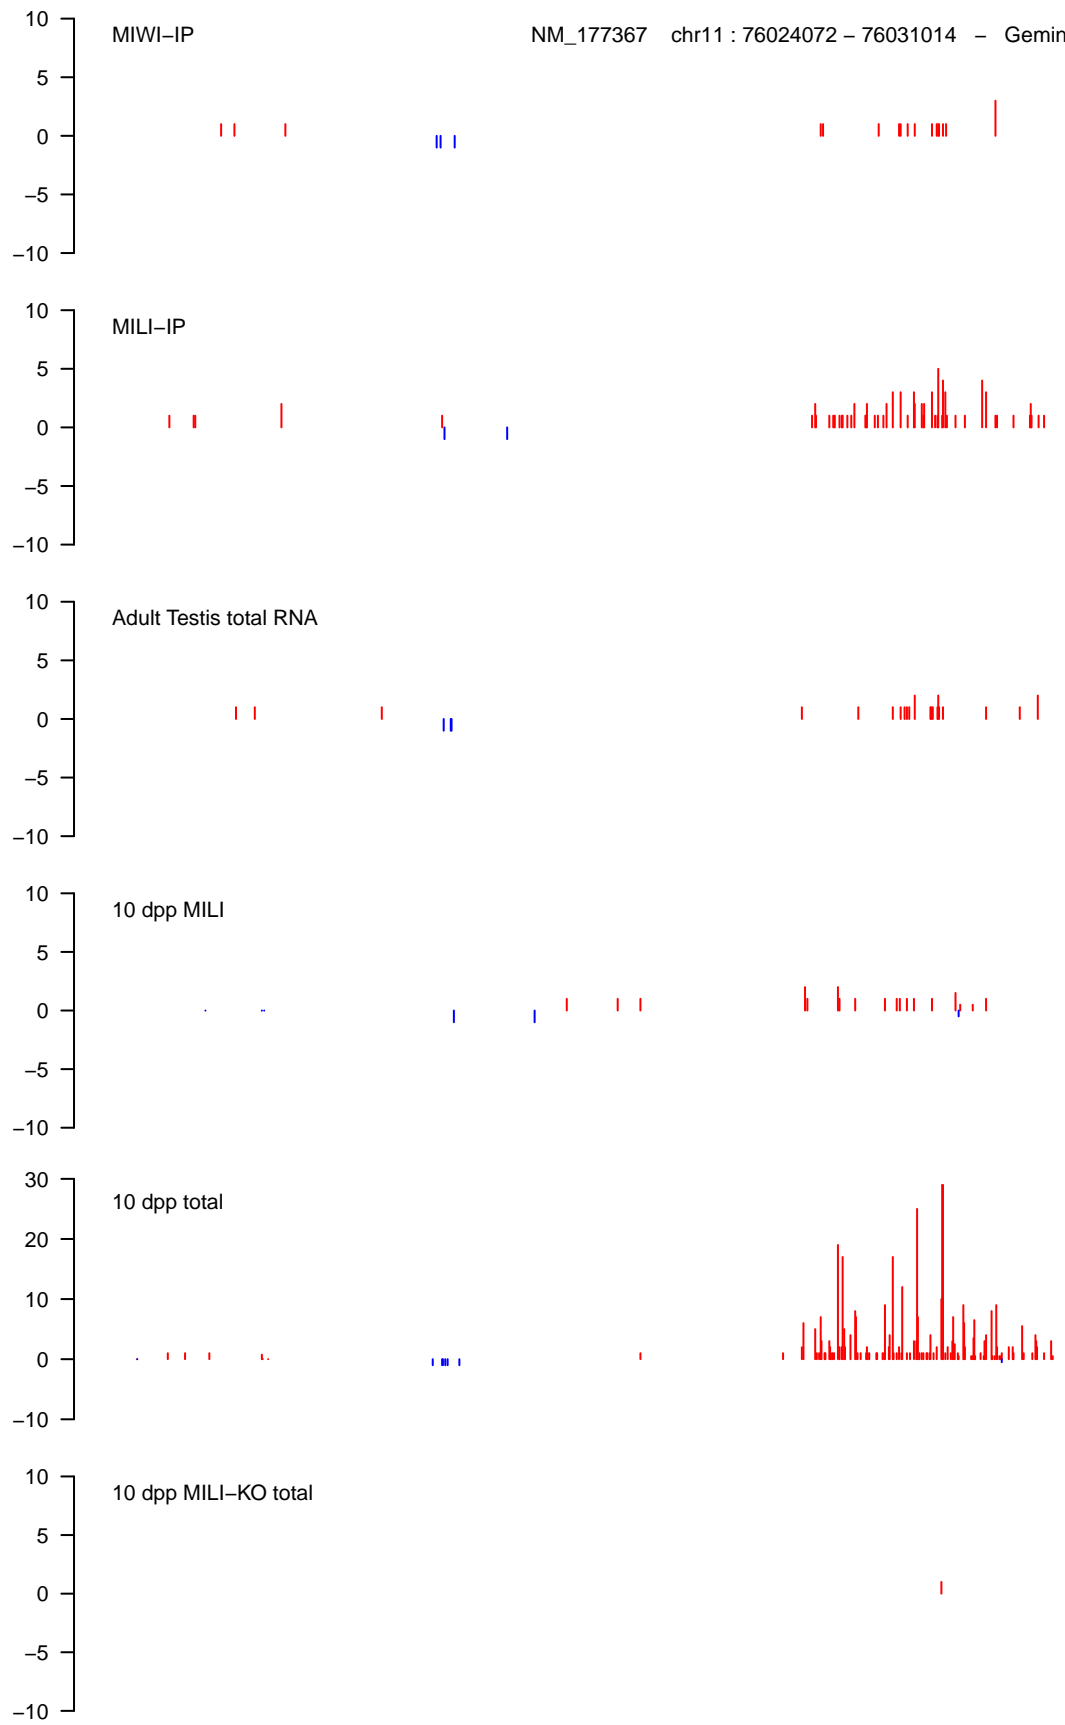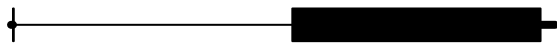

NM\_177367 chr11 76024072 76031014 - Gemin4



NM\_175229 chr17 : 23940153 – 23961710 + Srrm2

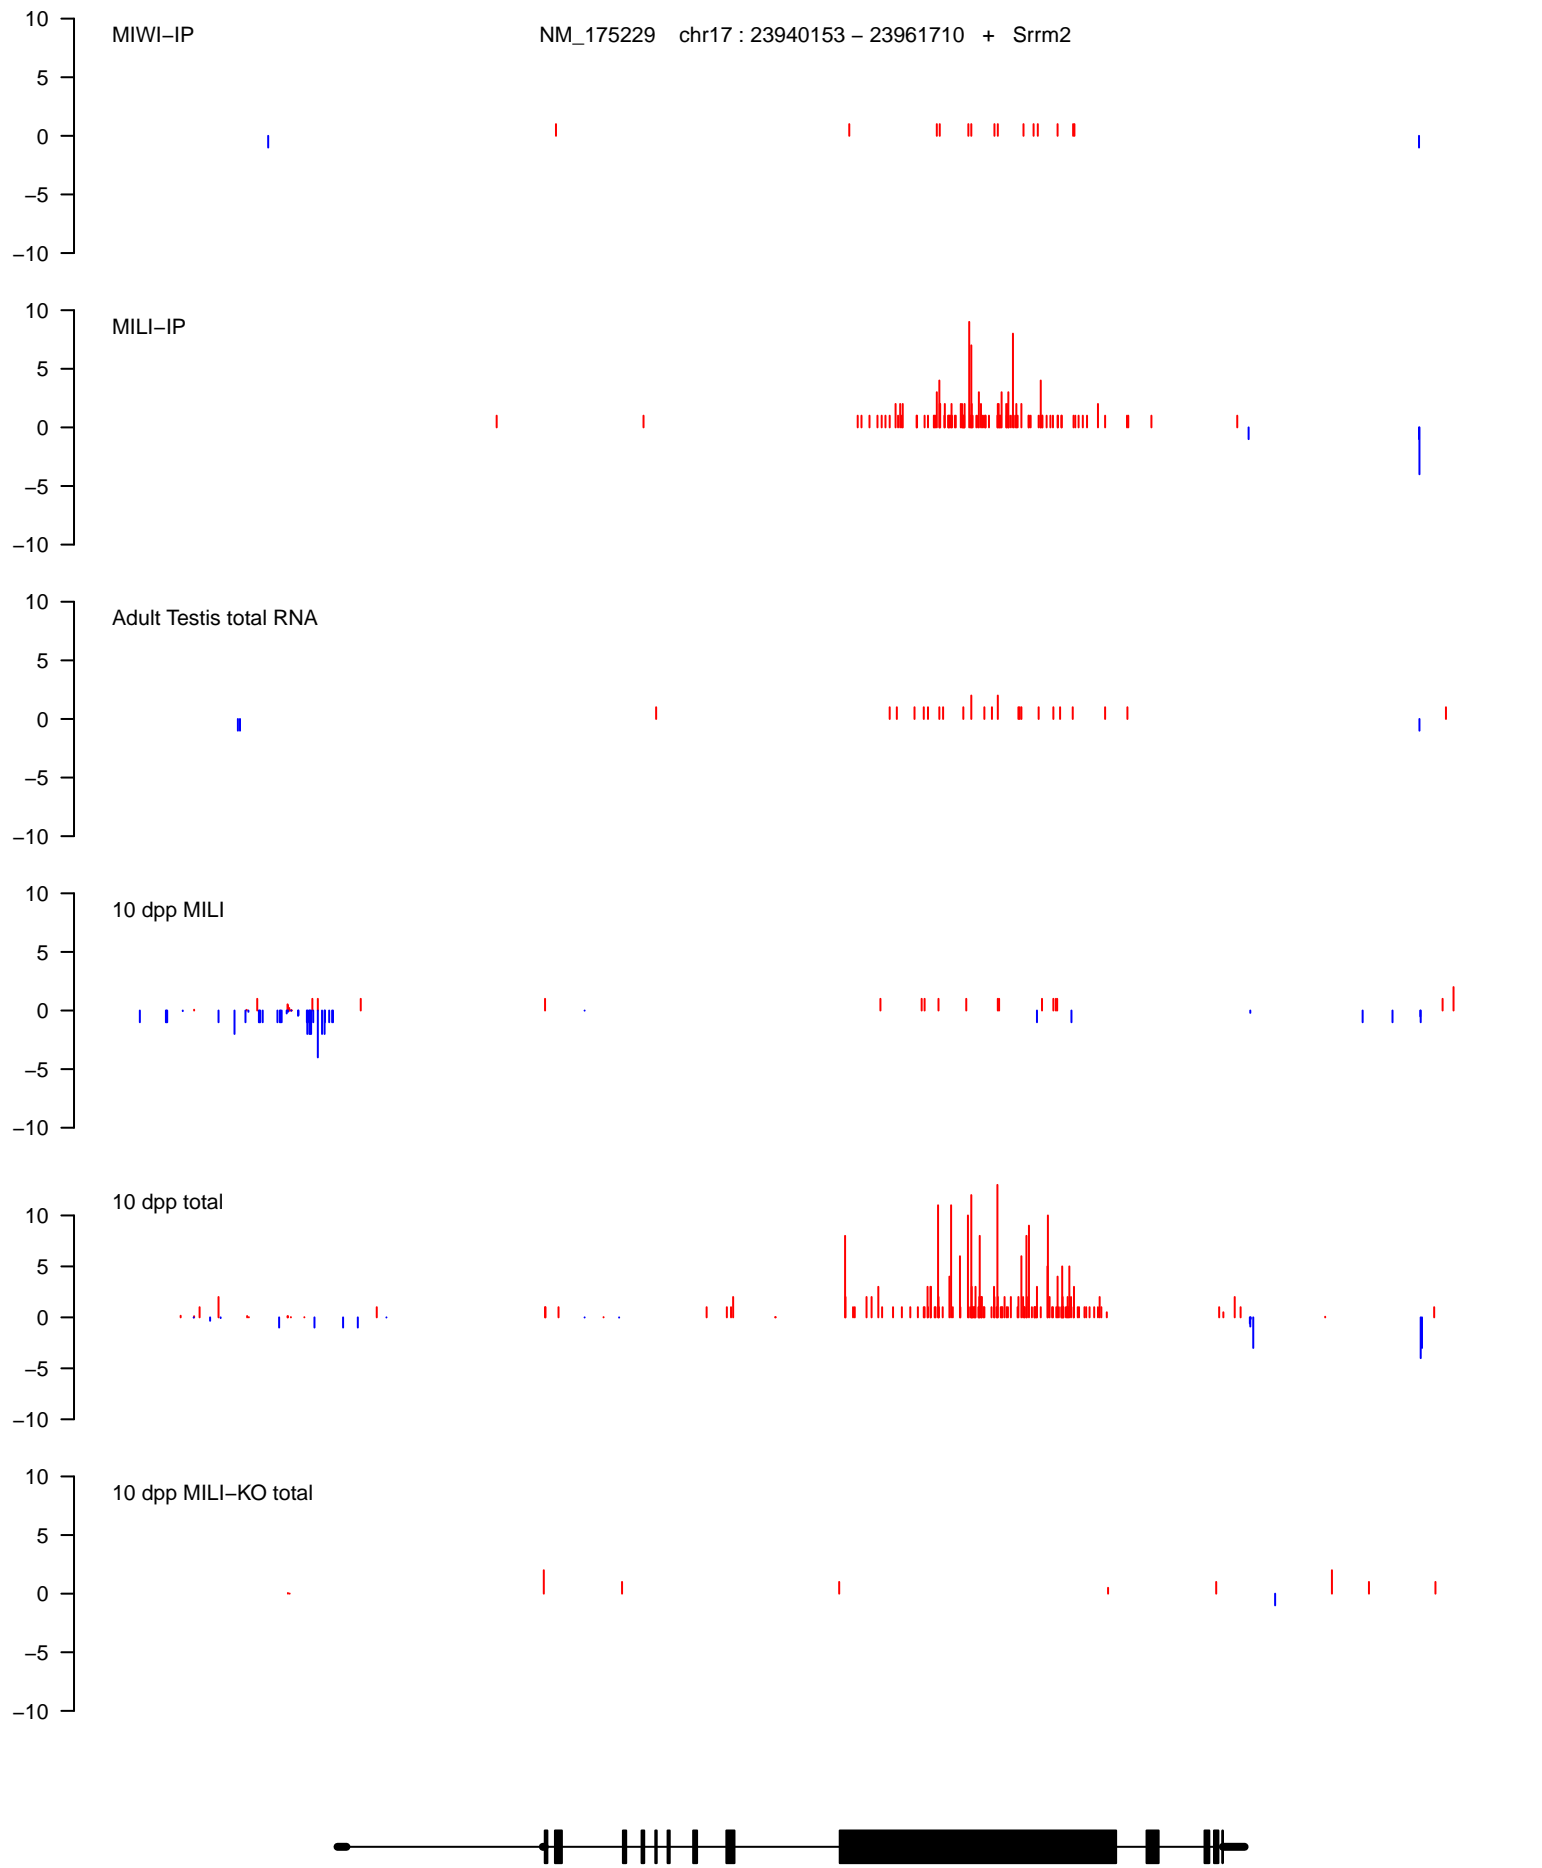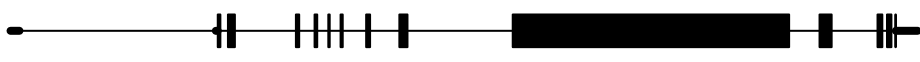

NM\_175229 chr17 23940153 23961710 + Srrm2

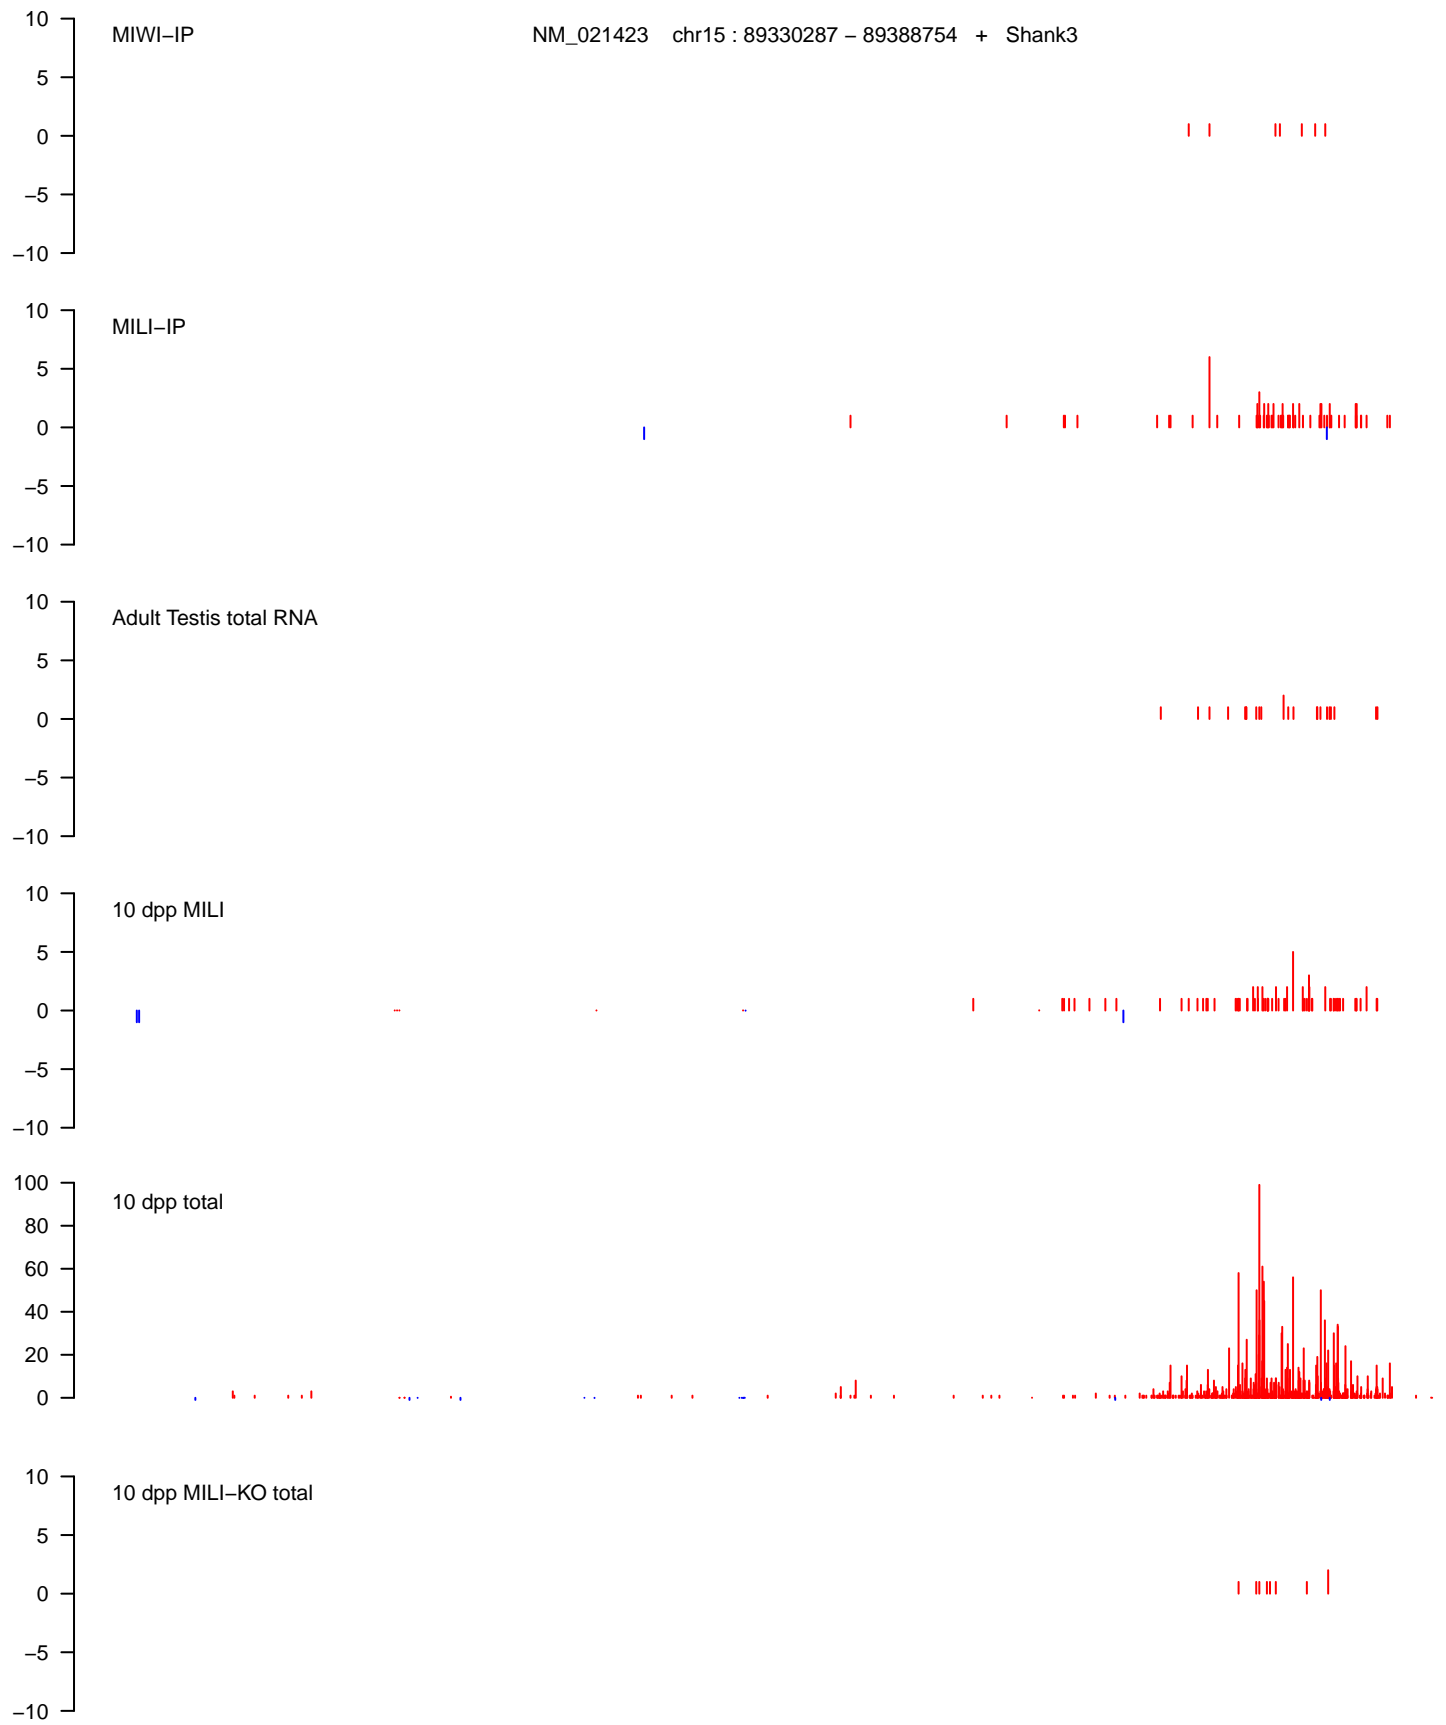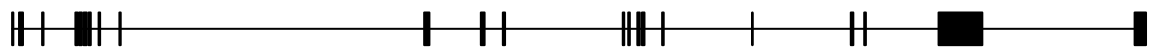

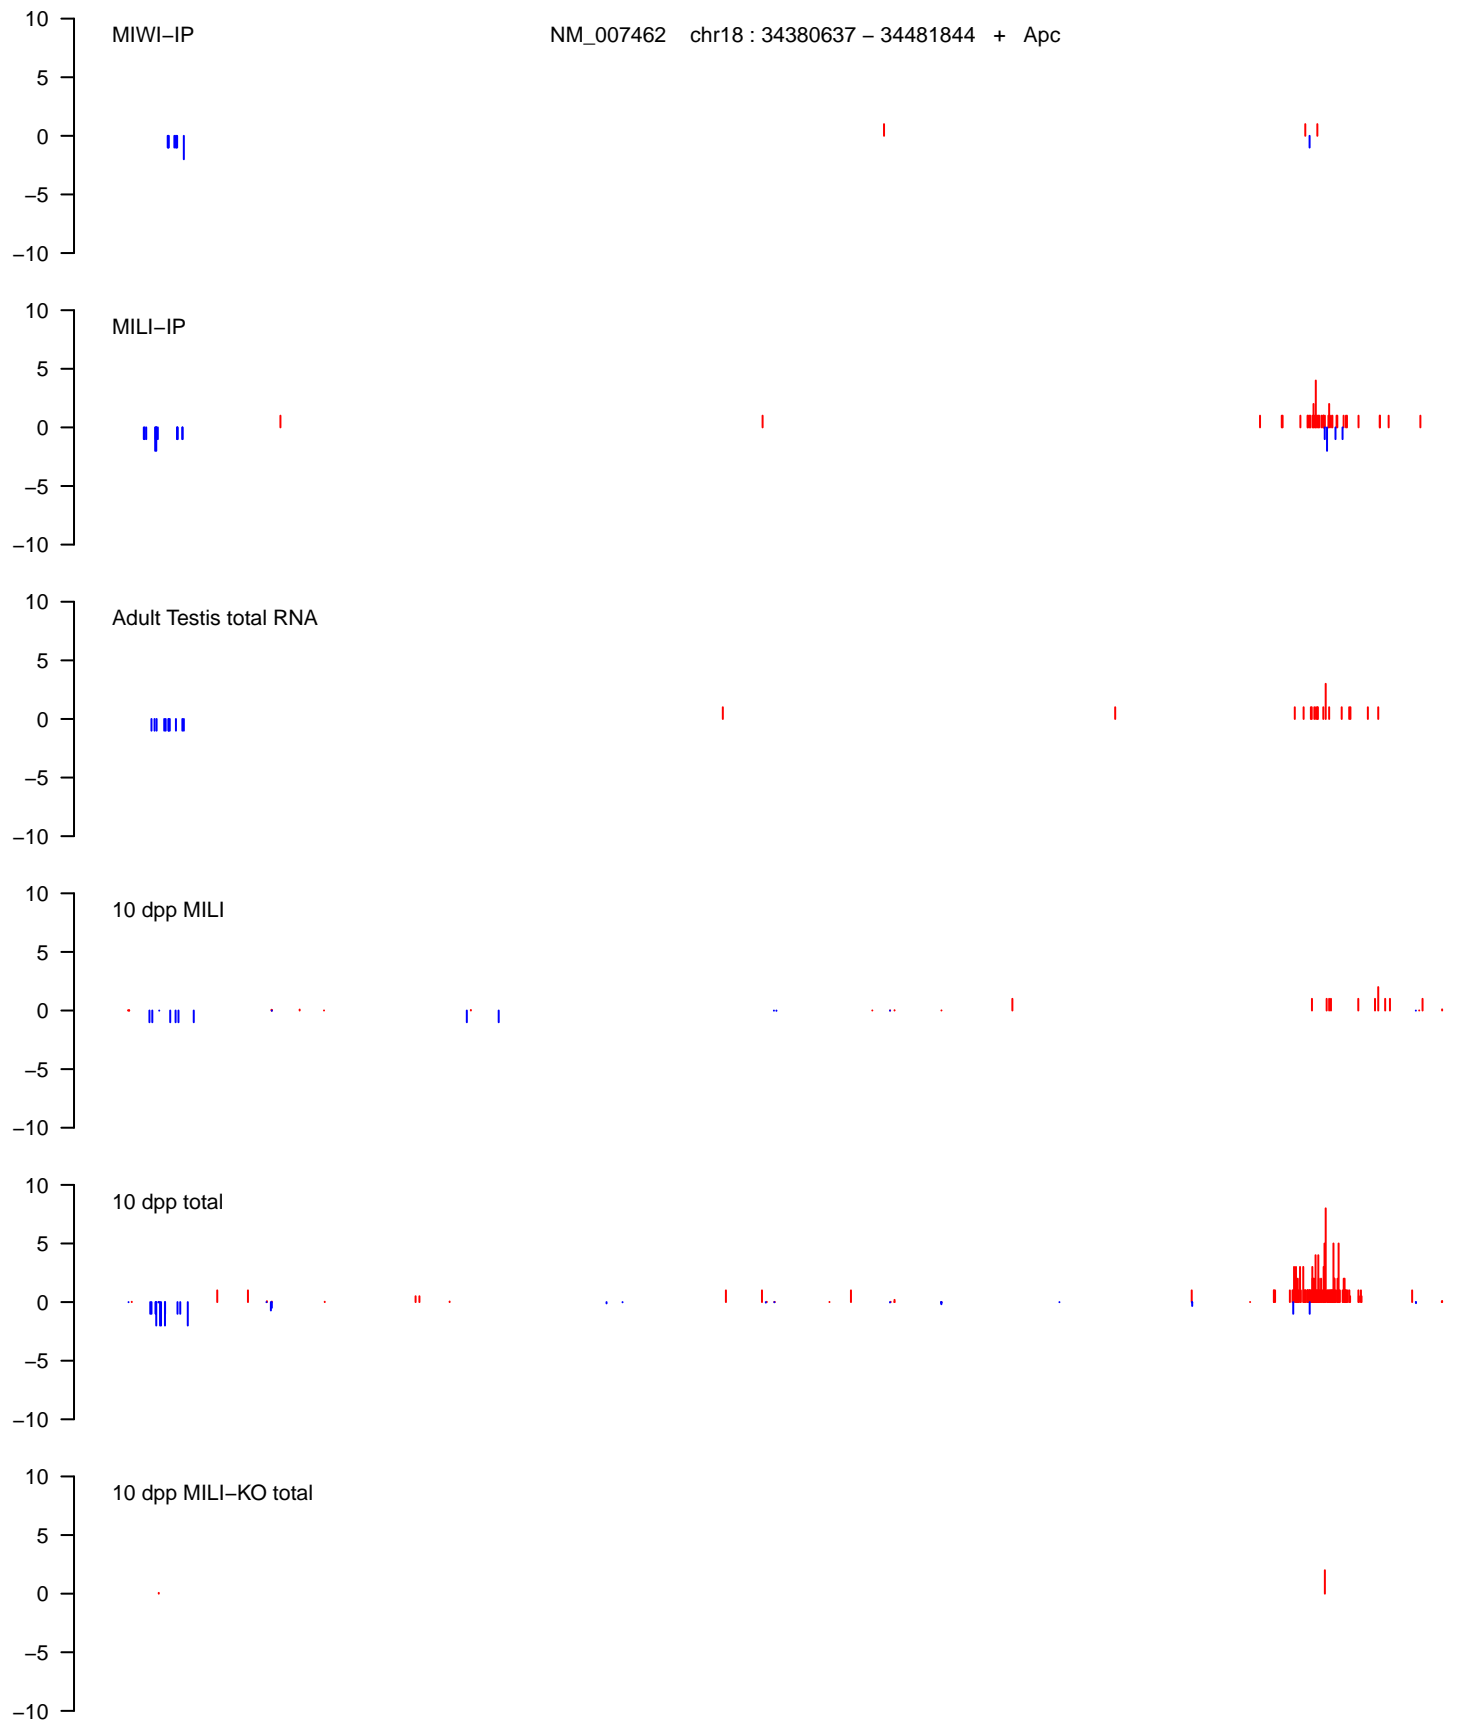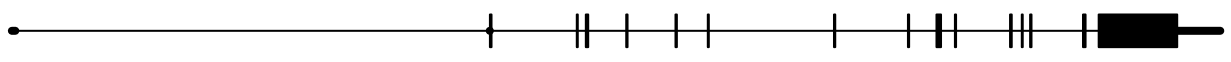

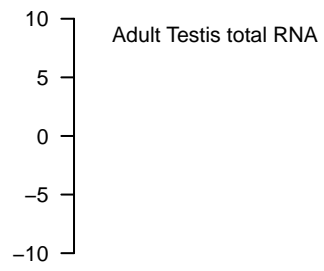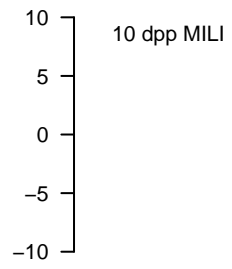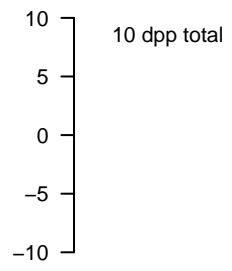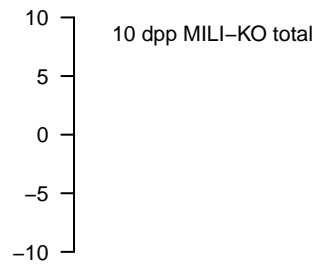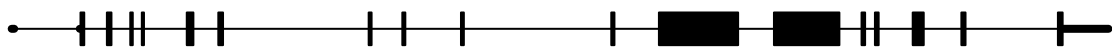

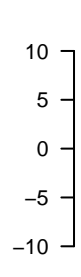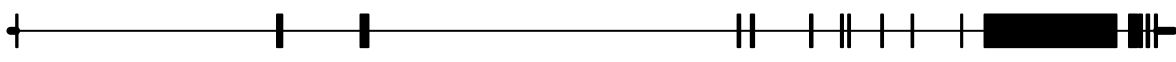

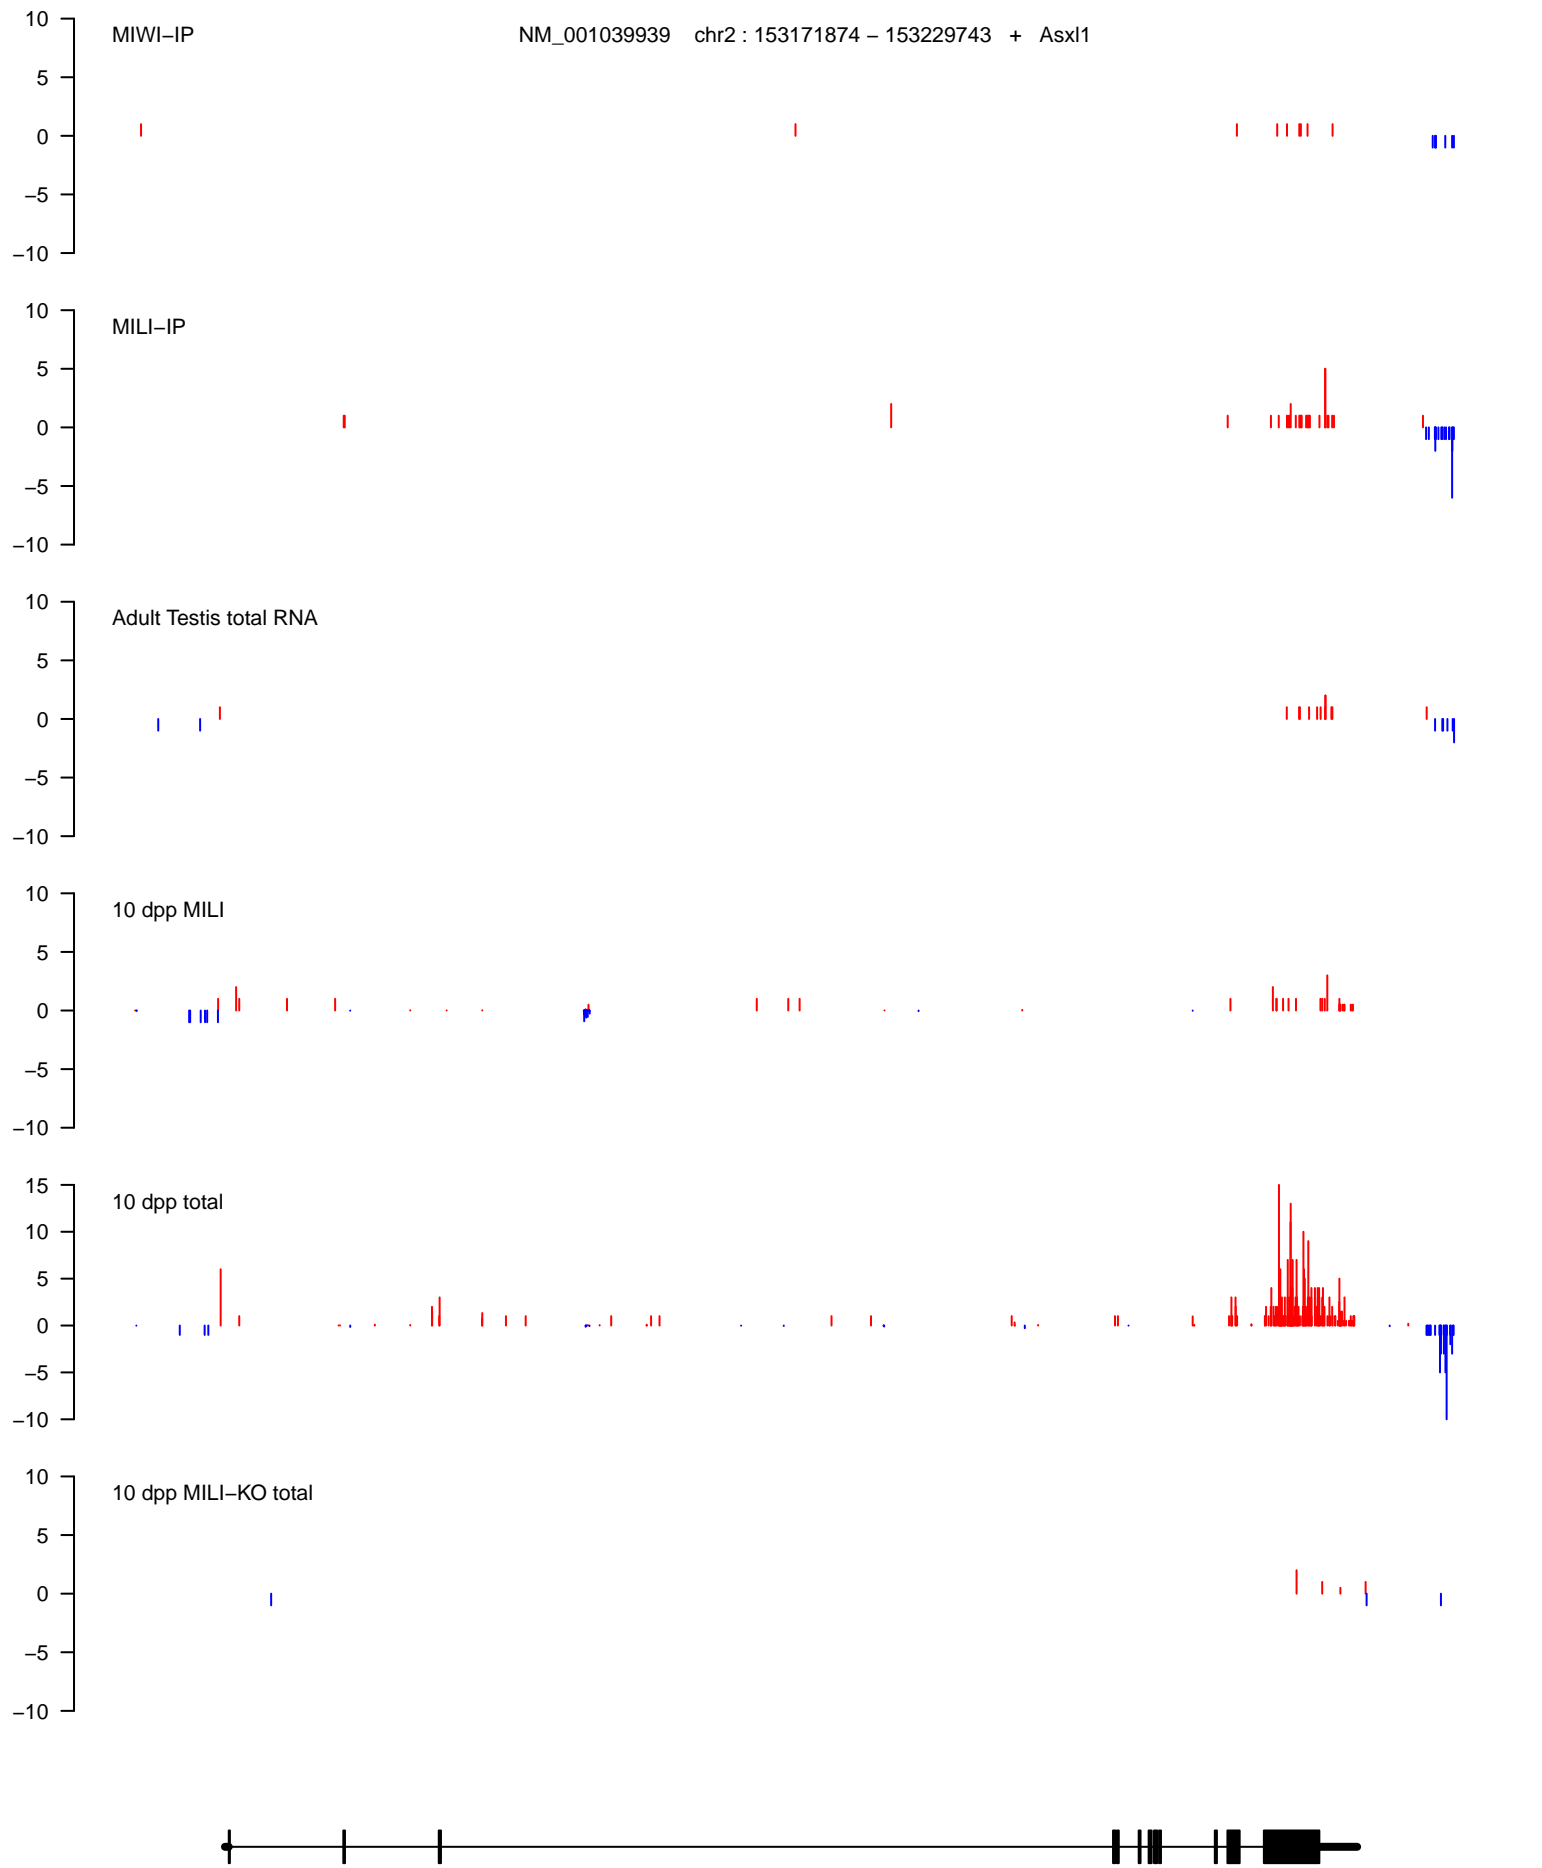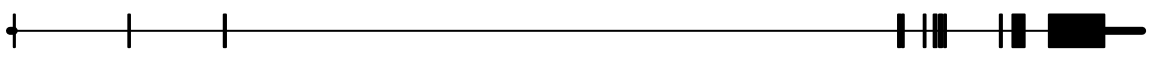

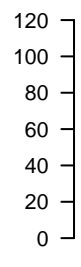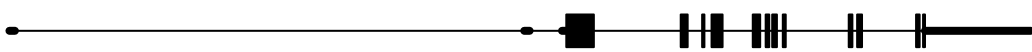

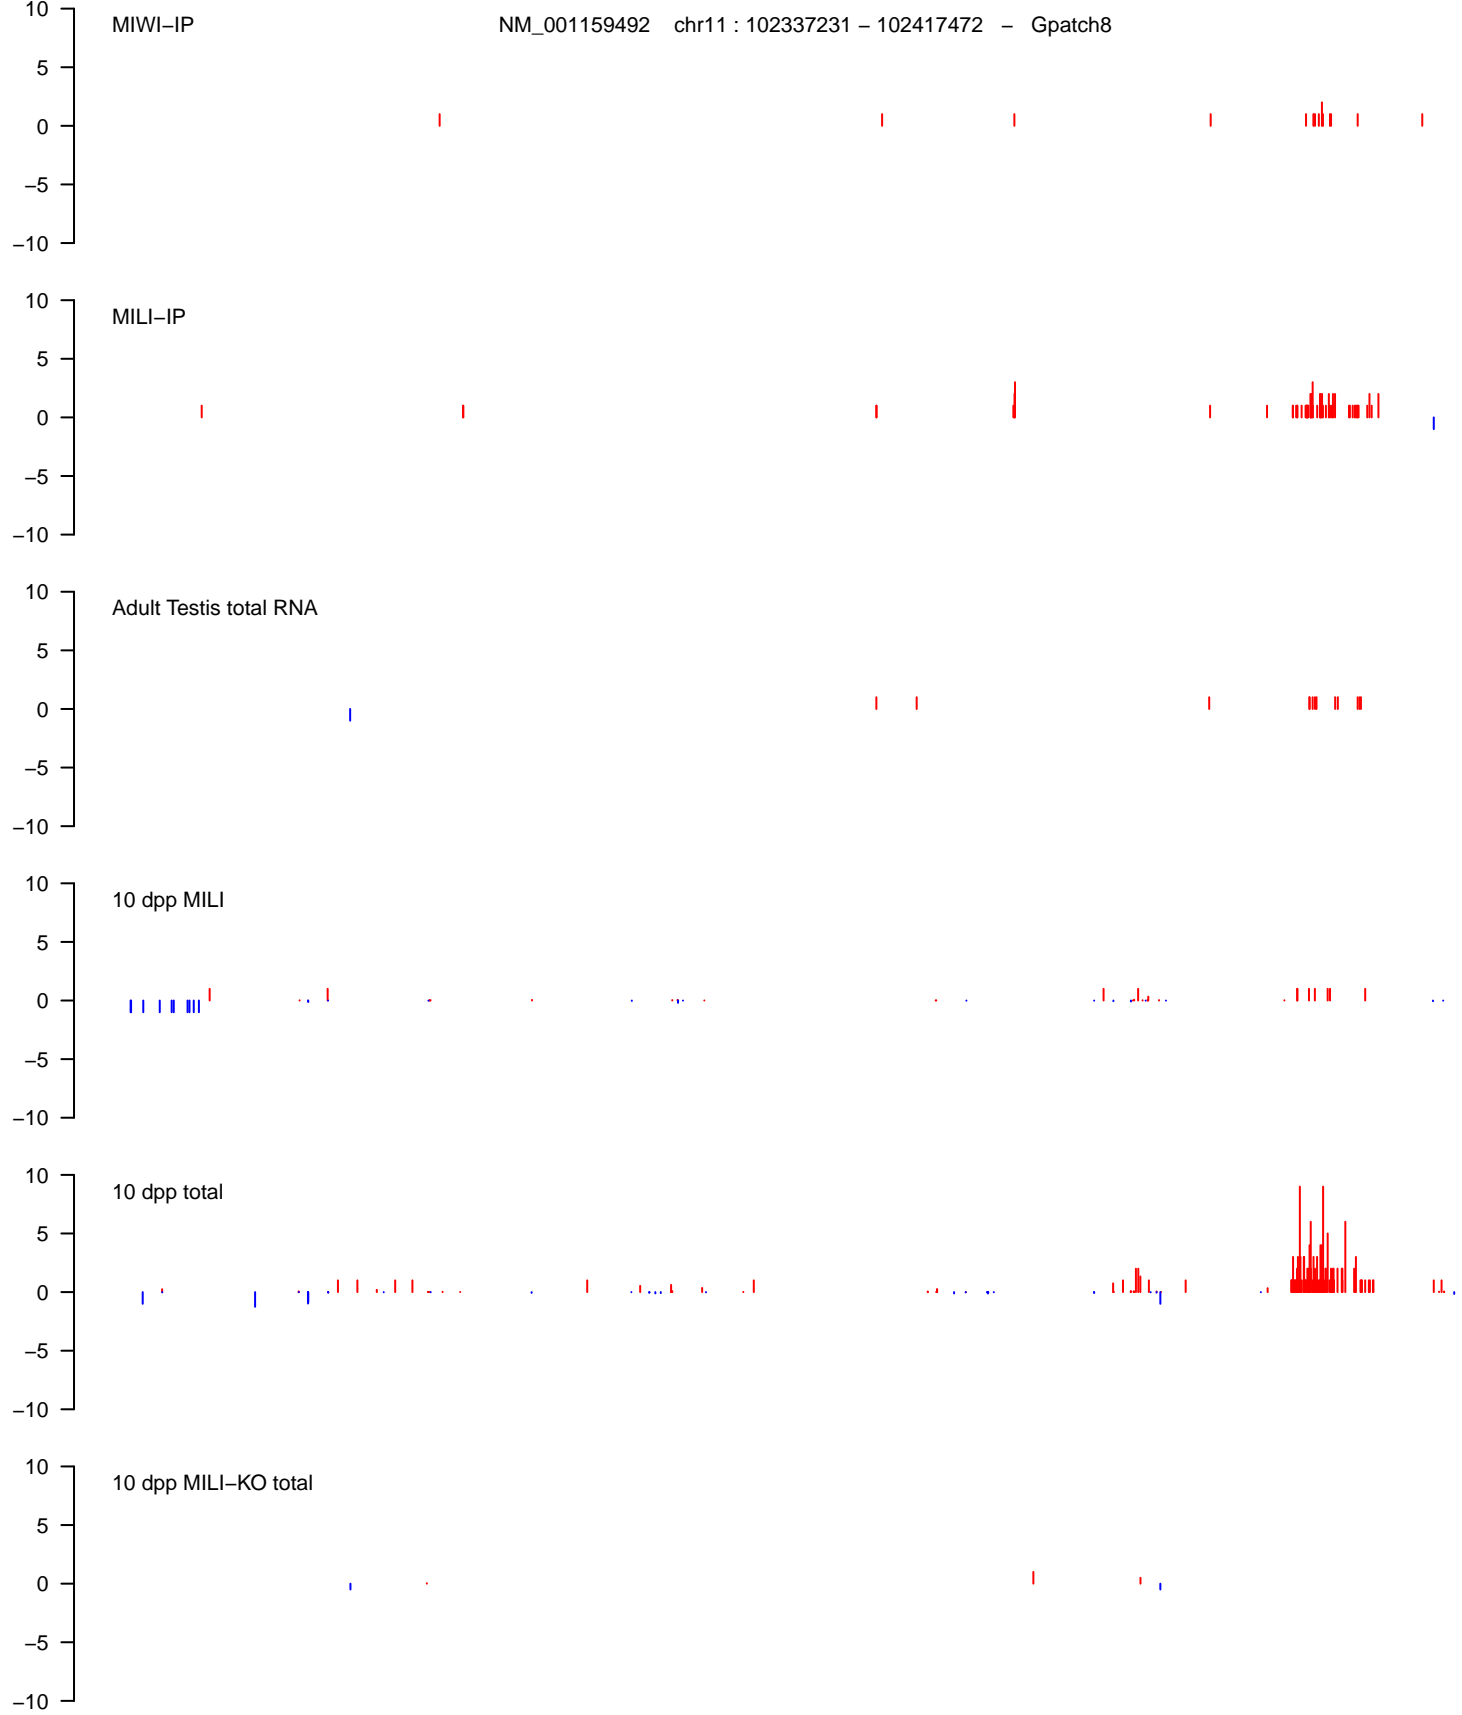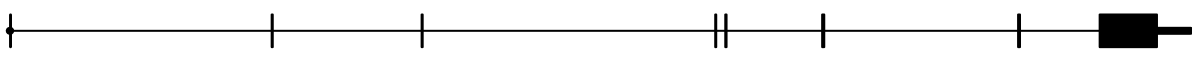



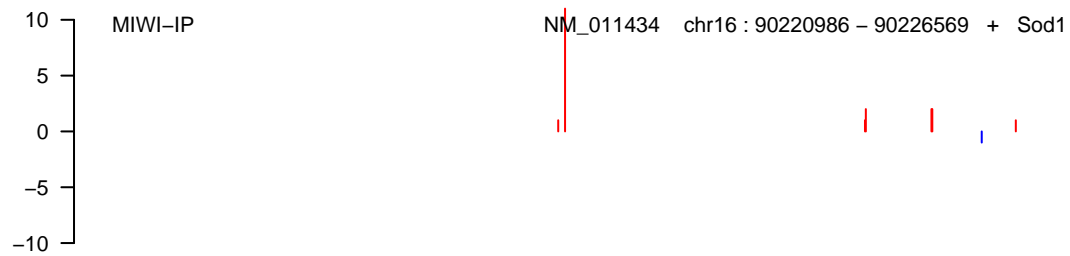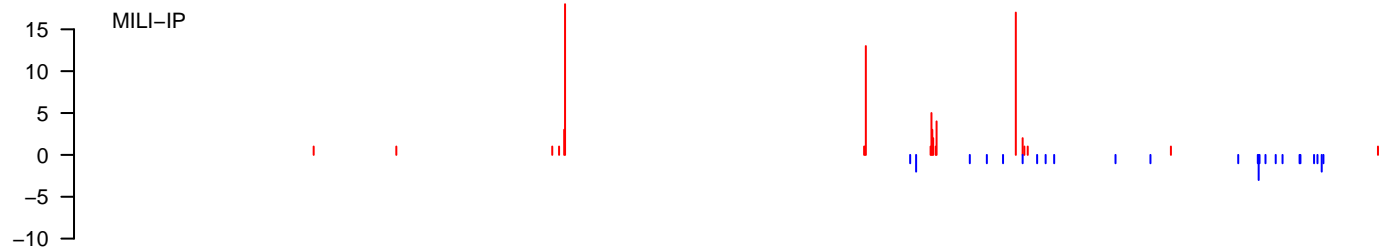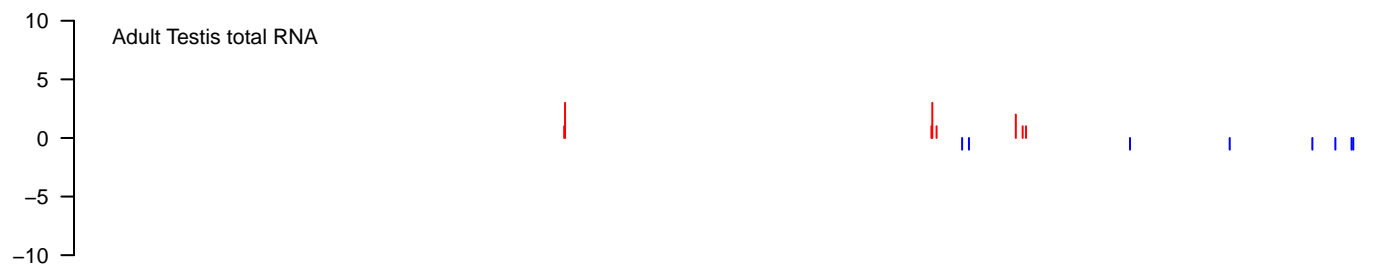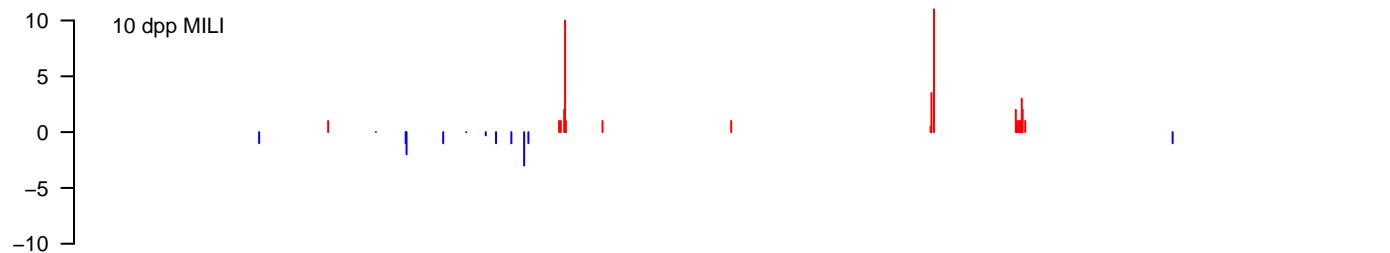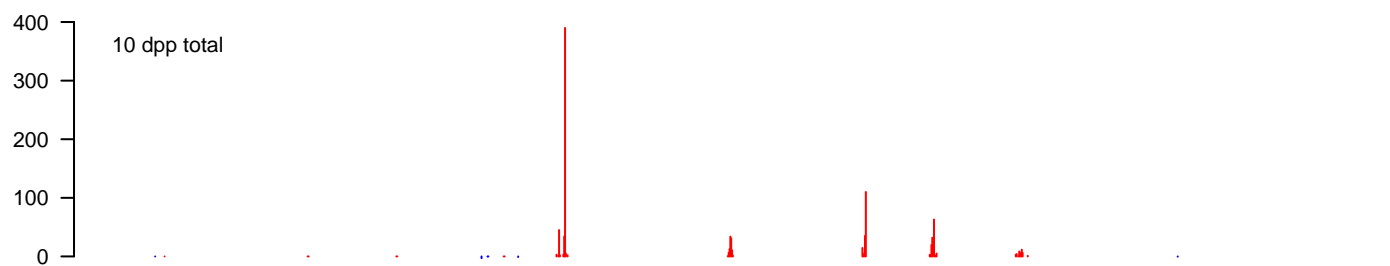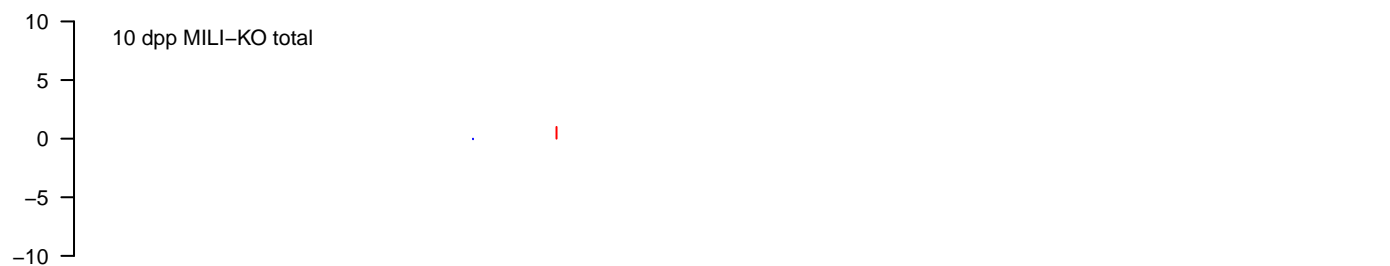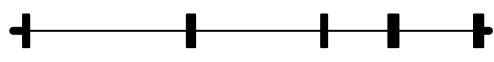

NM\_011434 chr16 90220986 90226569 + Sod1

NM\_018853 chr9: 61761089 – 61762317 – Rplp1

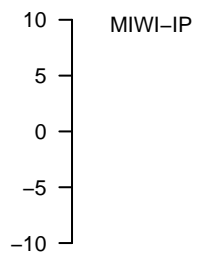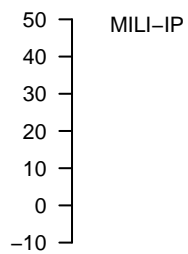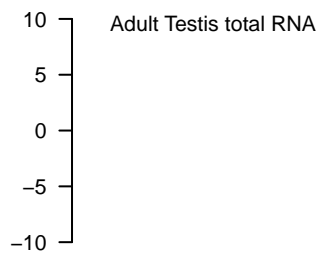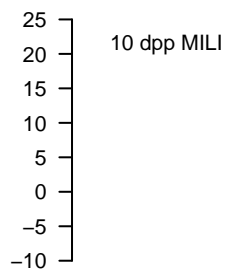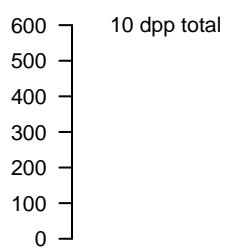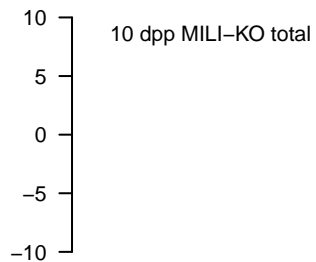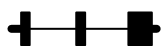

NM\_018853 chr9 61761089 61762317 – Rplp1

NM\_026020 chr7 : 148633548 – 148637241 + Rplp2

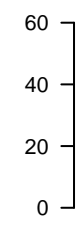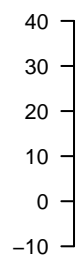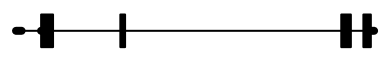

NM\_026020 chr7 148633548 148637241 + Rplp2

NM\_009095 chr7 : 13507683 – 13512034 + Rps5

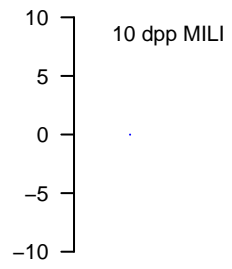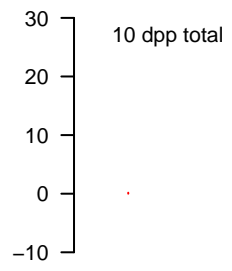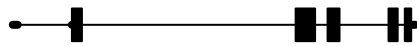

NM\_009095 chr7 13507683 13512034 + Rps5

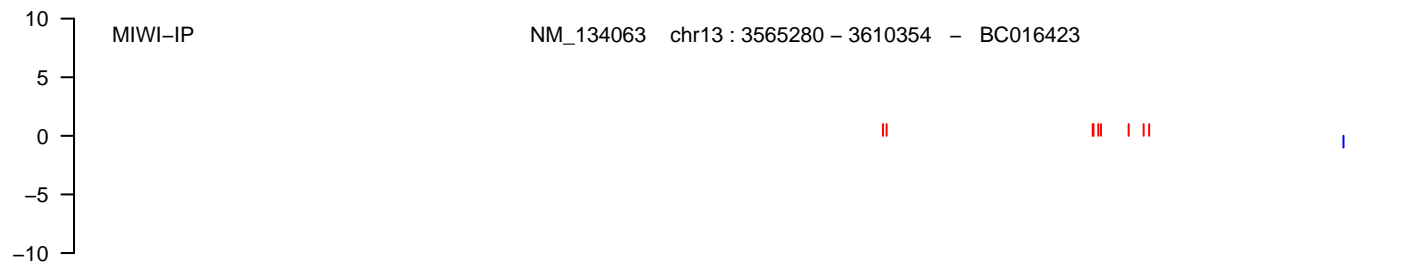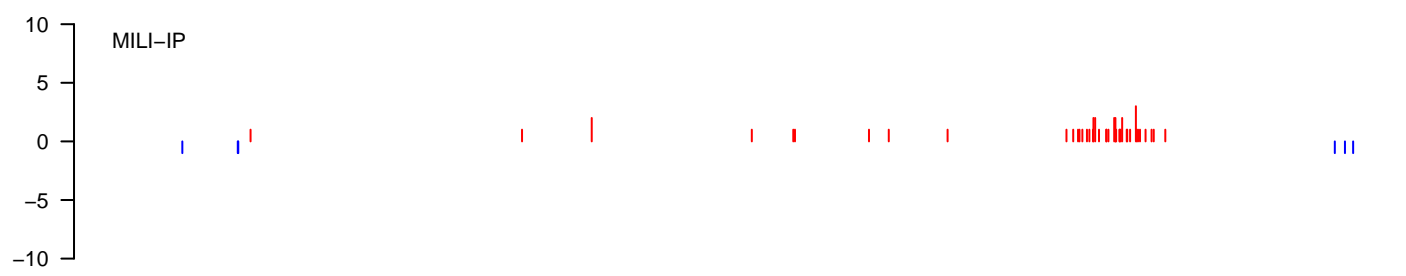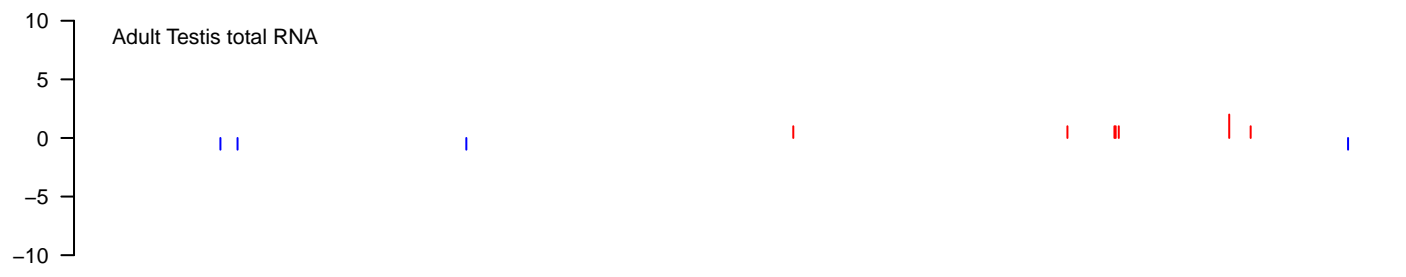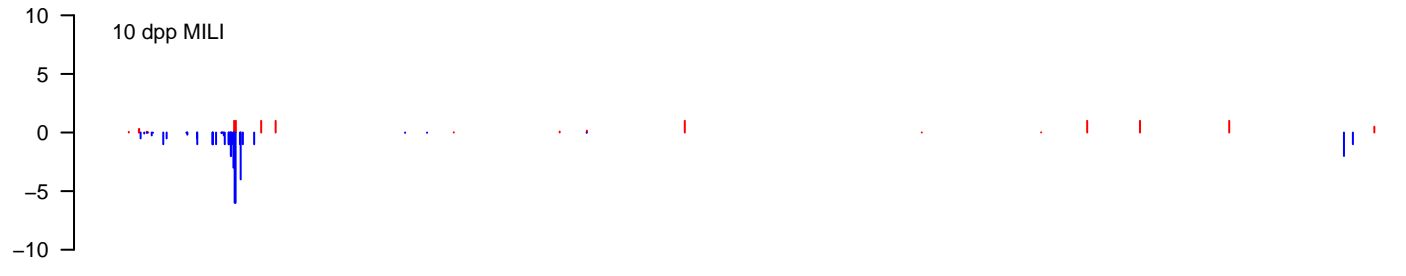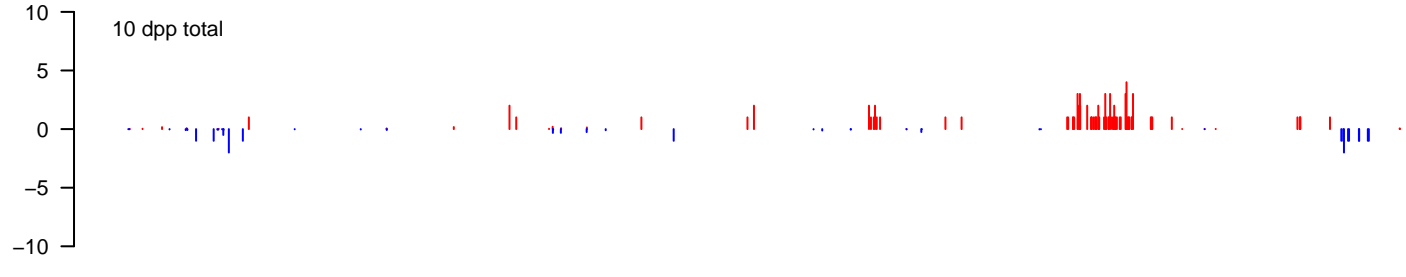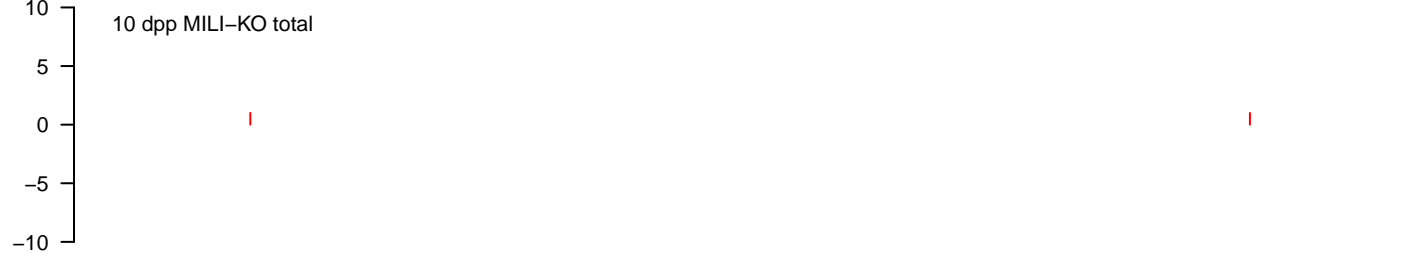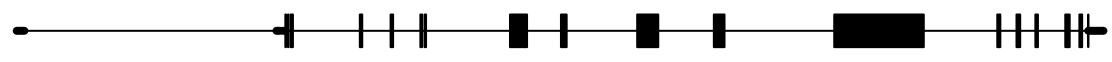

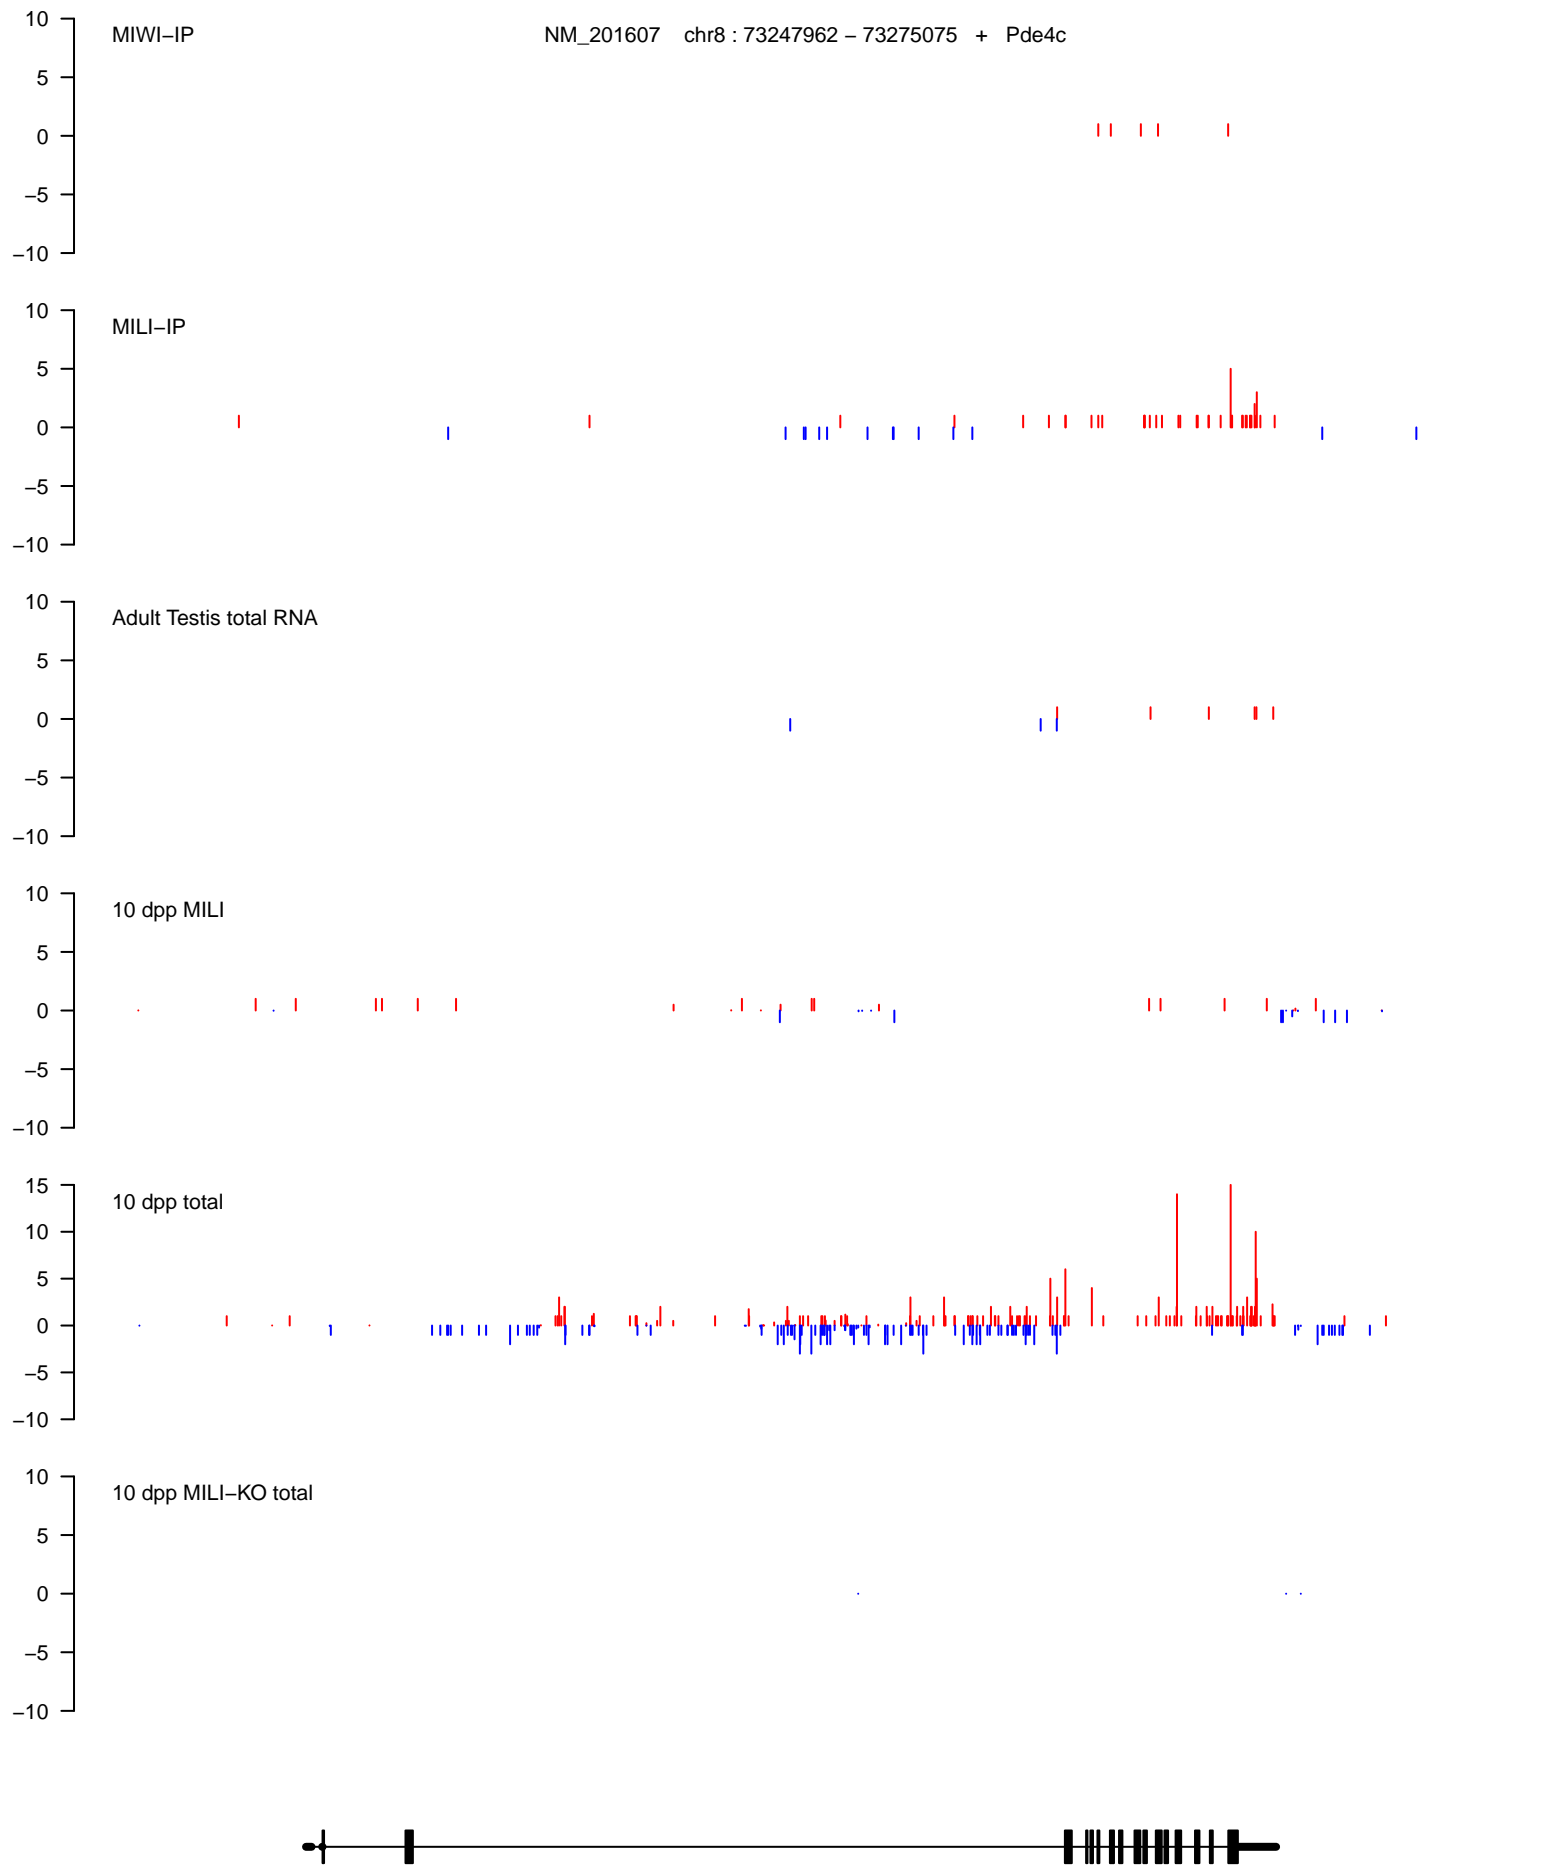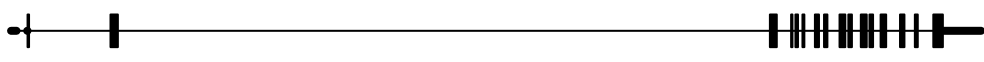

NM\_198048 chr7 : 28284342 – 28305060 + Prx

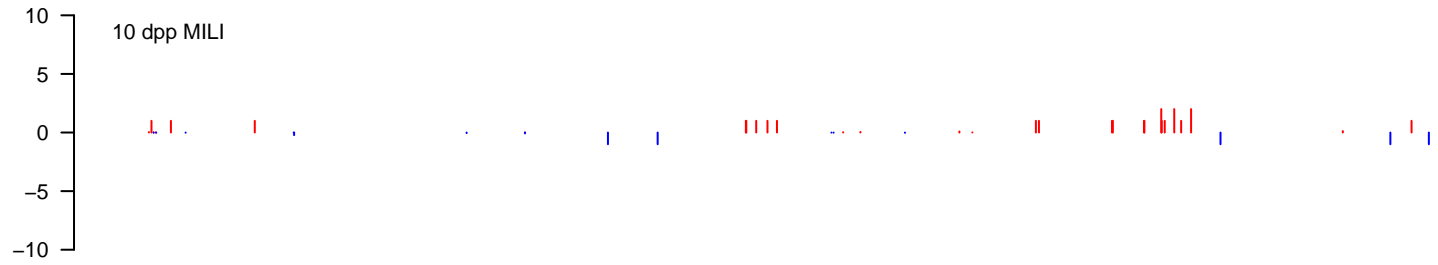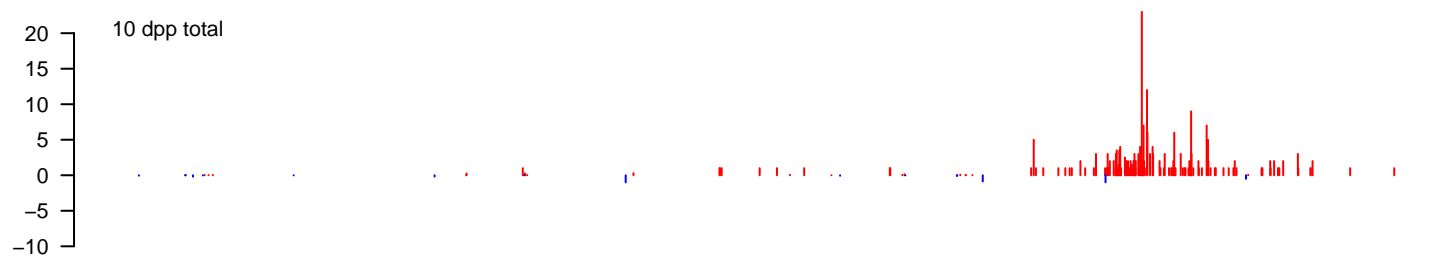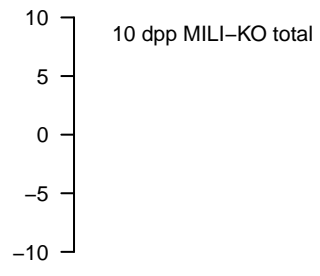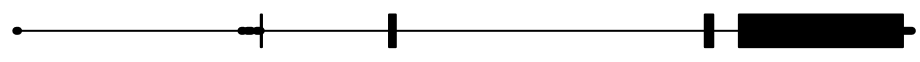

NM\_198048 chr7 28284342 28305060 + Prx

Table S1. cis-NAT-siRNAs in Dmel OSS (Library s2, s6, s7 &amp; s8) - overlap category "3' OVERLAP OVER SIN"

| Rank(21-mers in overlap | NAT # | Plus Strand Gene | Minus Strand Gene | Gene Region             |
|-------------------------|-------|------------------|-------------------|-------------------------|
| 1                       | 653   | Ptp99A           | CG2321            | chr3R:25241350-25314987 |
| 2                       | 204   | CG7737           | skf               | chr2R:7110376-7120056   |
| 3                       | 90    | SCAR             | piwi              | chr2L:10976774-10987416 |
| 4                       | 567   | CG5148           | cher              | chr3R:12914013-12944863 |
| 5                       | 463   | CG40351          | MED21             | chr3LHet:594458-601422  |
| 6                       | 602   | cenB1A           | CG31365           | chr3R:18944125-18952139 |
| 7                       | 431   | AGO2             | CG7739            | chr3L:15547217-15556163 |
| 8                       | 98    | CG14945          | Jhl-21            | chr2L:12049423-12055982 |
| 9                       | 144   | Pomp             | szar              | chr2L:20787649-20797040 |
| 10                      | 238   | unc-5            | Pms2              | chr2R:11237659-11259021 |
| 11                      | 375   | CG5146           | spo               | chr3L:5576789-5585677   |
| 12                      | 448   | fbl              | CG33969           | chr3L:20377531-20386648 |
| 13                      | 440   | Nrt              | CG13025           | chr3L:16759174-16772815 |
| 14                      | 135   | lok              | vlS               | chr2L:20061477-20065675 |
| 15                      | 621   | mld              | Syx18             | chr3R:20411385-20451302 |
| 16                      | 739   | CG4756           | Rrp45             | chrX:16681789-16685184  |
| 17                      | 513   | Cap-H2           | TfllFbeta         | chr3R:6587032-6593668   |
| 18                      | 133   | ref(2)P          | CG10337           | chr2L:19542446-19546914 |
| 19                      | 903   | CG5104           | CG4825            | chr3L:20514109-20519281 |
| 20                      | 718   | CG11750          | hop               | chrX:11253270-11262130  |
| 21                      | 126   | CG10431          | CG10641           | chr2L:18974710-18987276 |
| 22                      | 285   | mago             | Magi              | chr2R:17016084-17030067 |
| 23                      | 646   | CG5508           | Mes-4             | chr3R:23750915-23763571 |
| 24                      | 443   | fal              | pip               | chr3L:19287869-19330699 |
| 25                      | 723   | CG32654          | CG1463            | chrX:12490106-12505632  |
| 26                      | 635   | T48              | Ets97D            | chr3R:22707456-22738608 |
| 27                      | 177   | tsu              | Mys45A            | chr2R:4998306-5001458   |
| 28                      | 236   | CG8079           | Fs                | chr2R:11105886-11129084 |
| 29                      | 210   | Cct5             | CG8862            | chr2R:8062281-8066035   |
| 30                      | 256   | CG4853           | CG11419           | chr2R:13401710-13405688 |
| 30                      | 154   | SdhB             | CG15237           | chr2R:2695116-2697234   |
| 32                      | 205   | Vhl              | CG9062            | chr2R:7167231-7171461   |
| 33                      | 545   | CG33332          | CycC              | chr3R:10712202-10715915 |
| 34                      | 327   | Pof              | Mmp1              | chr2R:20556901-20574897 |
| 35                      | 489   | lds              | dsx               | chr3R:3746156-3793130   |
| 36                      | 683   | CG4025           | CG16903           | chrX:1971015-1974416    |
| 36                      | 66    | CG7224           | Wwox              | chr2L:7998934-8004267   |
| 38                      | 363   | CG12016          | CG11526           | chr3L:3319557-3328871   |
| 39                      | 166   | mus205           | CG1553            | chr2R:3680757-3693904   |
| 40                      | 617   | BRWD3            | CG5728            | chr3R:20144741-20159036 |
| 40                      | 506   | dmt              | hyd               | chr3R:5536862-5551333   |
| 42                      | 404   | CG3529           | CG3448            | chr3L:9439975-9444658   |
| 43                      | 634   | gro              | exo84             | chr3R:21867432-21877957 |
| 44                      | 460   | Ddx1             | CG11523           | chr3L:22256469-22259773 |



## Supplemental Data

| Gene     | Locus                  | Chromosome | Strand | Annotated Start |
|----------|------------------------|------------|--------|-----------------|
| tj       | chr2L:19464444-1946788 | 2L         | +      | 19464762        |
| brat     | chr2L:19133806-1917475 | 2L         | +      | 19133806        |
| larp     | chr3R:24143896-2415400 | 3R         | -      | 24143896        |
| dm       | chrX:3267216-3283137   | X          | +      | 3267216         |
| CG6424   | chr2R:13590749-1360683 | 2R         | -      | 13590842        |
| l(2)gl   | chr2L:9836-21372       | 2L         | -      | 9836            |
| CG10289  | chr3L:6159402-6166966  | 3L         | -      | 6162651         |
| jog      | chrX:19724188-19746084 | X          | -      | 19727372        |
| CG17514  | chr2RHet:2775860-28212 | 2RHet      | +      | 2775860         |
| CG32000  | chr4:152850-163754     | 4          | +      | 152850          |
| CG9821   | chr3R:4640282-4646386  | 3R         | -      | 4643363         |
| Klp10A   | chrX:11023366-11031056 | X          | -      | 11024269        |
| Sema-1a  | chr2L:8543333-8671239  | 2L         | +      | 8543333         |
| chrb     | chr3L:11480660-1149218 | 3L         | +      | 11480660        |
| CycG     | chr3R:27422362-2743838 | 3R         | -      | 27424172        |
| kel      | chr2L:18128495-1813821 | 2L         | -      | 18129330        |
| Tis11    | chrX:12553395-12577219 | X          | +      | 12553395        |
| Nipped-A | chr2R:1065471-1138553  | 2R         | -      | 1065506         |
| CG41099  | chr3RHet:1685102-17060 | 3RHet      | -      | 1685102         |
| Patr-1   | chr3R:12869290-1287415 | 3R         | +      | 12869290        |
| jumu     | chr3R:6175906-6187403  | 3R         | +      | 6175906         |
| unk      | chr3R:18975368-1898359 | 3R         | -      | 18977275        |
| Pi3K21B  | chr2L:297882-305225    | 2L         | +      | 297882          |
| hdc      | chr3R:26103656-2619303 | 3R         | +      | 26103656        |
| Mitf     | chr4:1219484-1228193   | 4          | +      | 1219484         |
| CG32654  | chrX:12490106-12504549 | X          | +      | 12490106        |
| nmo      | chr3L:7972149-8046455  | 3L         | +      | 7972149         |
| cue      | chr3L:1502551-1517238  | 3L         | -      | 1503213         |
| CG33129  | chr2L:10964891-1097027 | 2L         | -      | 10965140        |
| Art4     | chr3R:5808300-5811777  | 3R         | -      | 5808902         |
| CG3164   | chr2L:122615-130791    | 2L         | -      | 122615          |
| jim      | chr3L:22788253-2282648 | 3L         | -      | 22789076        |
| Vha16    | chr2R:2512744-2520633  | 2R         | -      | 2514418         |
| Hrb27C   | chr2L:6920710-6931145  | 2L         | +      | 6920710         |
| Khc-73   | chr2R:11403283-1141974 | 2R         | -      | 11403283        |
| CG5521   | chr3R:22792463-2280365 | 3R         | +      | 22793166        |
| CG40084  | chr2RHet:3105718-31796 | 2RHet      | -      | 3105718         |
| Tif-IA   | chr2L:22249878-2225826 | 2L         | +      | 22249878        |
| Baldspot | chr3L:16641275-1665472 | 3L         | -      | 16641920        |
| Lk6      | chr3R:7576600-7591468  | 3R         | -      | 7578506         |
| smi21F   | chr2L:1114651-1128953  | 2L         | -      | 1114652         |
| Bsg      | chr2L:8083422-8110561  | 2L         | +      | 8083422         |
| CG6701   | chr2R:9860477-9866564  | 2R         | -      | 9860494         |
| emc      | chr3L:749406-753505    | 3L         | +      | 749406          |
| CG11319  | chr2L:6568384-6601066  | 2L         | -      | 6568390         |
| lola     | chr2R:6369262-6430767  | 2R         | -      | 6369712         |
| scyl     | chr3L:11245409-1124932 | 3L         | +      | 11245409        |
| Dcr-2    | chr2R:13462021-1346901 | 2R         | -      | 13462484        |

Table S3. Reannotation of previously published classification of piRNA clusters during mouse sperm:

| Fetal piRNA Clusters from Kuramochi-miyagawa et al, 2008 (Top 205) |             |                              | Pre-pachyt   |
|--------------------------------------------------------------------|-------------|------------------------------|--------------|
| Cluster rank                                                       | Annotation  | mm9 genomic coordinates      | Cluster rank |
| 4                                                                  | genic       | chr5:143573022-143772011     | 2            |
| 5                                                                  | genic       | chr7:20338183-20529572       | 5            |
| 15                                                                 | genic       | chr1:157,916,594-157,932,790 | 6            |
| 53                                                                 | genic       | chr13:23839051-23856005      | 7            |
| 62                                                                 | genic       | chr2:130019360-130103781     | 8            |
| 70                                                                 | genic       | chr5:23206473-23221773       | 9            |
| 74                                                                 | genic       | chr11:74644873-74660175      | 10           |
| 76                                                                 | genic       | chr9:108409137-108471143     | 11           |
| 81                                                                 | genic       | chr19:5388966-5525803        | 12           |
| 86                                                                 | genic       | chr19:10057229-10059483      | 13           |
| 88                                                                 | genic       | chr10:127521201-127527172    | 15           |
| 90                                                                 | genic       | chr6:85394957-85434467       | 16           |
| 91                                                                 | genic       | chr13:23663702-23677482      | 17           |
| 93                                                                 | genic       | chr10:79255497-79326913      | 18           |
| 103                                                                | genic       | chr2:164247855-164356383     | 20           |
| 107                                                                | genic       | chr15:88691752-88699597      | 21           |
| 108                                                                | genic       | chr9:64022690-64026295       | 22           |
| 110                                                                | genic       | chr7:13507239-13616054       | 23           |
| 111                                                                | genic       | chr11:95561845-95634213      | 24           |
| 116                                                                | genic       | chr16:4613535-4651224        | 25           |
| 118                                                                | genic       | chr17:23945099-23965905      | 30           |
| 123                                                                | genic       | chr7:134913749-135025389     | 32           |
| 140                                                                | genic       | chr3:58219450-58221232       | 33           |
| 141                                                                | genic       | chr8:123191823-123198033     | 34           |
| 145                                                                | genic       | chr7:52706953-52715130       | 35           |
| 147                                                                | genic       | chr17:34040985-34089514      | 36           |
| 151                                                                | genic       | chr4:151595041-151609592     | 37           |
| 167                                                                | genic       | chr7:106627286-106634566     | 38           |
| 168                                                                | genic       | chr7:107986952-108080585     | 39           |
| 171                                                                | genic       | chr7:4959068-5019101         | 40           |
| 201                                                                | genic       | chr11:48604590-48617765      | 41           |
| 204                                                                | genic       | chr11:69476073-69485842      | 42           |
| 20                                                                 | genic-3'UTR | chr8:119729782-119737057     | 44           |
| 29                                                                 | genic-3'UTR | chr1:133914766-133928861     | 45           |
| 30                                                                 | genic-3'UTR | chr7:52234285-52385890       | 46           |
| 31                                                                 | genic-3'UTR | chr4:134922569-135019317     | 48           |
| 34                                                                 | genic-3'UTR | chr2:167300506-167343822     | 49           |
| 35                                                                 | genic-3'UTR | chr11:60591171-60602578      | 50           |
| 39                                                                 | genic-3'UTR | chr11:77886512-77895660      | 51           |
| 41                                                                 | genic-3'UTR | chr9:114314202-114476826     | 52           |
| 44                                                                 | genic-3'UTR | chr1:162935067-162968244     | 53           |

Table S4A. Analysis of piRNAs from mouse testis development stages

| Library ID                | Library description        | Total unique reads mapped | Intergenic piRNAs | 5'UTR unique piRNAs |
|---------------------------|----------------------------|---------------------------|-------------------|---------------------|
| GSM319960                 | 10 dpp total               | 1235570                   | 695208            | 14667               |
| GSM319953                 | 10 dpp MILI IP             | 868541                    | 824184            | 3494                |
| GSM319961                 | 10 dpp MILI-KO total       | 177079                    | 164907            | 4377                |
| s_1.mapped_MIWI_2.txt     | 8 wks Adult testis Miwi IP | 4561847                   | 4439916           | 4698                |
| s_2.mapped_MILI_2.txt     | 8 wks Adult testis Mili IP | 7250340                   | 6925673           | 16617               |
| s_3.mapped_AdTestis_2.txt | 8 wks total small RNA      | 5051156                   | 4920341           | 6378                |

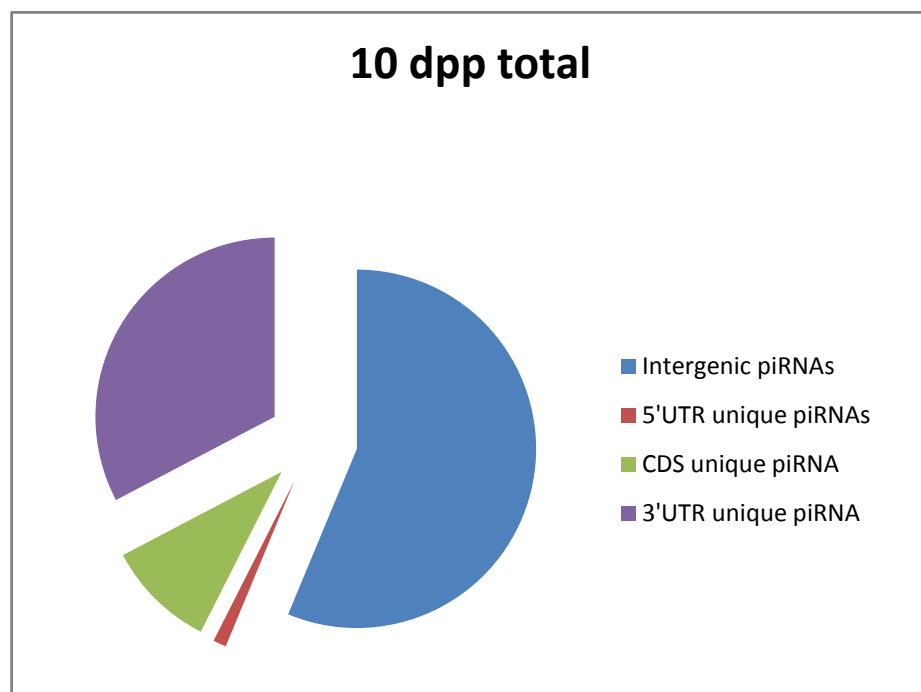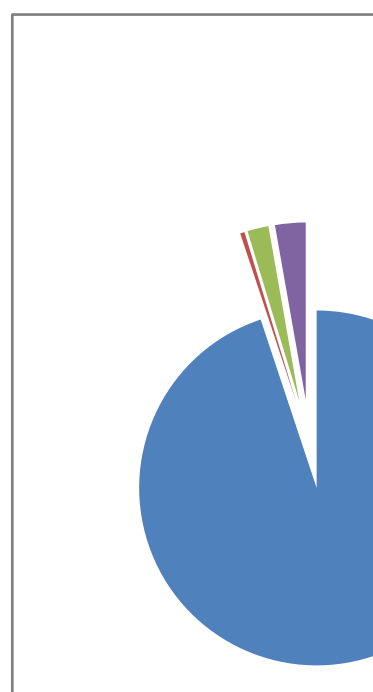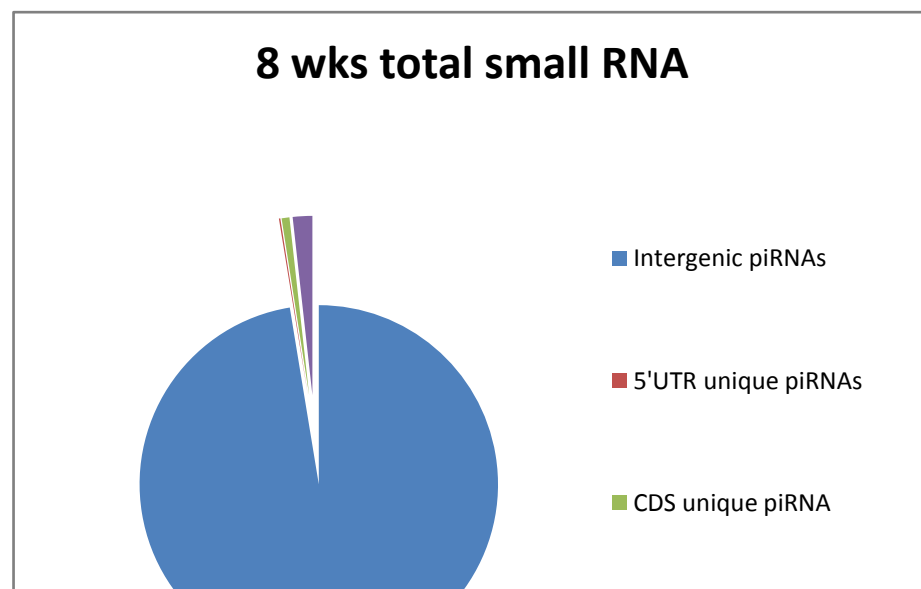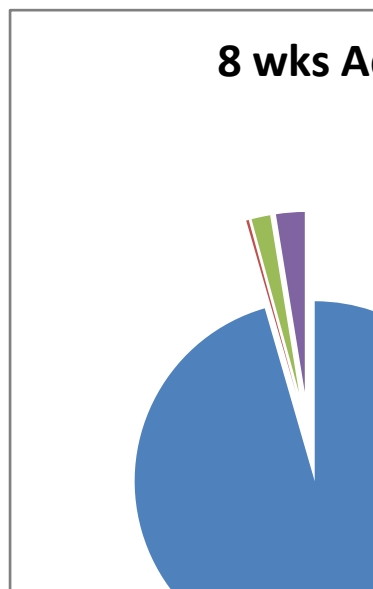

## Supplemental Data

| Gene       | Chro  | Start     | End       | Strand | Name        | size_3UTR |
|------------|-------|-----------|-----------|--------|-------------|-----------|
| NM_007923  | chr1  | 133904181 | 133929261 | +      | Elk4        | 345       |
| NM_175518  | chr4  | 56888634  | 56960301  | -      | D730040F13F | 18        |
| NM_009595  | chr1  | 158488917 | 158579750 | +      | Abl2        | 262       |
| NM_0011102 | chr15 | 103021976 | 103045783 | -      | Cbx5        | 231       |
| NM_029885  | chr3  | 94985689  | 95021864  | -      | Gabpb2      | 538       |
| NM_173424  | chr1  | 162946386 | 162964390 | -      | Zbtb37      | 203       |
| NM_023755  | chr1  | 120524521 | 120581745 | +      | Tcfcp2l1    | 96        |
| NM_177338  | chr14 | 65440554  | 65568684  | -      | Hmbox1      | 328       |
| NM_026579  | chr10 | 82822997  | 82832080  | +      | D10Wsu102e  | 6         |
| NM_175543  | chr11 | 79404713  | 79511514  | +      | Rab11fip4   | 64        |
| NM_010124  | chr10 | 60891244  | 60915417  | -      | Eif4ebp2    | 123       |
| NM_153582  | chr8  | 106872165 | 106919596 | -      | Cmtm4       | 60        |
| NM_178922  | chr16 | 17233679  | 17263523  | +      | Hic2        | 217       |
| NM_010633  | chr1  | 172124386 | 172145524 | -      | Uhmk1       | 153       |
| NM_146012  | chr10 | 126432668 | 126437031 | +      | Ctdsp2      | 287       |
| NM_022980  | chr4  | 134968223 | 134989720 | -      | Rcan3       | 231       |
| NM_174997  | chr1  | 34870070  | 34899819  | -      | Fam168b     | 158       |
| NM_134437  | chr14 | 27852186  | 27920472  | +      | Il17rd      | 103       |
| NM_0010425 | chr9  | 114416640 | 114473487 | -      | Trim71      | 1252      |
| NM_017376  | chr15 | 81641902  | 81657293  | +      | Tef         | 97        |
| NM_153484  | chr15 | 81633246  | 81657290  | +      | Tef         | 3         |
| NM_0010334 | chr12 | 88507191  | 88541179  | -      | Tmed8       | 26        |
| NM_0010336 | chr4  | 107900359 | 107973695 | -      | Zyg11b      | 170       |
| NM_008306  | chr18 | 60844379  | 60873043  | -      | Ndst1       | 154       |
| NM_153512  | chr17 | 83978796  | 84031235  | -      | Kcng3       | 277       |
| NM_178665  | chr16 | 24393435  | 24992662  | +      | Lpp         | 550       |
| NM_138657  | chr11 | 97223864  | 97259856  | +      | Socs7       | 91        |
| NM_011630  | chr6  | 92088987  | 92122203  | +      | Nr2c2       | 66        |
| NM_176833  | chr16 | 16903413  | 16927455  | +      | Ppm1f       | 68        |
| NM_134100  | chr15 | 102109886 | 102120175 | +      | Mfsd5       | 192       |
| NM_172510  | chr1  | 133923197 | 133964639 | -      | Mfsd4       | 170       |
| NM_176958  | chr19 | 44637343  | 44650764  | +      | Hif1an      | 24        |
| NM_0010011 | chr6  | 85419571  | 85452880  | -      | Fbxo41      | 492       |
| NM_0010333 | chr5  | 143632217 | 143656917 | -      | Fbxl18      | 132       |
| NM_021366  | chr7  | 71031752  | 71083743  | -      | Klf13       | 311       |
| NM_010756  | chr11 | 120486416 | 120494861 | -      | Mafg        | 214       |
| NM_0010810 | chr7  | 30906966  | 30920301  | +      | Zfp382      | 86        |
| NM_173388  | chr11 | 75345211  | 75391043  | +      | Slc43a2     | 73        |
| NM_009149  | chr8  | 113679457 | 113783102 | -      | Glg1        | 6         |
| NM_172505  | chr1  | 90159652  | 90174132  | -      | A730008H23I | 88        |
| NM_0010809 | chr8  | 112250350 | 112261639 | -      | Atxn1l      | 348       |
| NM_025454  | chr1  | 95700541  | 95718677  | +      | Ing5        | 38        |
| NM_172860  | chr2  | 154262219 | 154365092 | +      | Cbfa2t2     | 119       |
| NM_025578  | chr6  | 92119516  | 92134017  | -      | Mrps25      | 50        |
| NM_172284  | chr8  | 113527087 | 113551664 | -      | Ddx19b      | 110       |
| NM_172977  | chr2  | 28678094  | 28695806  | -      | Gtf3c4      | 59        |
| NM_198308  | chr8  | 113618644 | 113660544 | +      | 4930402E16F | 135       |
| NM_153516  | chr6  | 120786247 | 120842860 | +      | Bcl2l13     | 177       |

## Supplemental Data

| Gene       | Chro  | Start     | End       | Strand | Name        | size_3UTR |
|------------|-------|-----------|-----------|--------|-------------|-----------|
| NM_0010349 | chr6  | 85061409  | 85076088  | -      | EG545861    | 3990      |
| NM_027939  | chr3  | 124104072 | 124128946 | -      | 1700006A11F | 235       |
| NM_013763  | chr5  | 135625580 | 135638532 | +      | Tbl2        | 2980      |
| NM_0011132 | chr10 | 127131484 | 127138103 | +      | Tmem194     | 4654      |
| NM_023046  | chr1  | 93437656  | 93456167  | +      | Asb1        | 4712      |
| NM_175535  | chr9  | 51573456  | 51661164  | +      | Arhgap20    | 2660      |
| NR_026798  | chr13 | 21596184  | 21598393  | -      | Zfp389      | 934       |
| NM_172284  | chr8  | 113527087 | 113551664 | -      | Ddx19b      | 5062      |
| NR_026924  | chr1  | 93301458  | 93302606  | -      | 1700020N18F | 544       |
| NM_0010814 | chr4  | 56815200  | 56822477  | +      | BC026590    | 3434      |
| NM_011630  | chr6  | 92088987  | 92117953  | +      | Nr2c2       | 326       |
| NM_173732  | chr10 | 127114120 | 127132222 | +      | Tmem194     | 508       |
| NM_153178  | chr15 | 72935377  | 73015365  | -      | Eif2c2      | 1960      |
| NM_009261  | chr2  | 37425389  | 37502805  | -      | Strbp       | 14160     |
| NM_172509  | chr5  | 130620757 | 130631678 | +      | Kctd7       | 3201      |
| NM_026514  | chr17 | 79733364  | 79754431  | -      | Cdc42ep3    | 700       |
| NM_134033  | chr11 | 5428890   | 5442220   | -      | Ccdc117     | 2408      |
| NM_0010127 | chr5  | 113786313 | 113786841 | +      | Aym1        | 167       |
| NM_172882  | chr5  | 102264603 | 102498940 | -      | Wdfy3       | 573       |
| NM_199323  | chr8  | 26265023  | 26311921  | -      | Tacc1       | 5200      |
| NM_010127  | chr15 | 100405748 | 100416796 | -      | Pou6f1      | 2955      |
| NM_027184  | chr10 | 70810540  | 70848633  | +      | Ipmk        | 4067      |
| NM_183141  | chr15 | 78500436  | 78548543  | -      | Elfn2       | 1867      |
| NM_029478  | chr11 | 86397366  | 86497324  | -      | Tmem49      | 1443      |
| NM_0011102 | chr15 | 103021976 | 103045783 | -      | Cbx5        | 8095      |
| NM_009595  | chr1  | 158488917 | 158579750 | +      | Abl2        | 6903      |
| NM_212473  | chr7  | 139903766 | 140004879 | -      | Fam53b      | 3559      |
| NM_175403  | chr5  | 115592989 | 115608185 | -      | Mlec        | 4934      |
| NM_009682  | chr7  | 87020210  | 87065526  | -      | Ap3s2       | 5159      |
| NM_011844  | chr6  | 88674821  | 88778351  | +      | Mgll        | 2581      |
| NM_198103  | chr8  | 127414198 | 127421605 | -      | Exoc8       | 5177      |
| NM_0010249 | chr1  | 162836541 | 162905107 | +      | Rc3h1       | 7179      |
| NM_027946  | chr11 | 105898185 | 105920637 | +      | Wdr68       | 4468      |
| NM_173388  | chr11 | 75345211  | 75388543  | +      | Slc43a2     | 2565      |
| NM_153516  | chr6  | 120786247 | 120842860 | +      | Bcl2l13     | 5451      |
| NM_020570  | chr5  | 25195633  | 25211615  | -      | Xrcc2       | 2297      |
| NR_002840  | chr1  | 162965296 | 162968668 | +      | Gas5        |           |
| NM_207682  | chr4  | 148550429 | 148681807 | -      | Kif1b       | 4447      |
| NM_007619  | chr9  | 43957344  | 44042129  | -      | Cbl         | 2183      |
| NM_138657  | chr11 | 97223864  | 97259856  | +      | Socs7       | 5184      |
| NM_172860  | chr2  | 154262219 | 154365092 | +      | Cbfa2t2     | 4176      |
| NM_028821  | chr12 | 85455277  | 85484460  | +      | Dnalc1      | 5116      |
| NM_010772  | chr7  | 134165650 | 134169993 | -      | Maz         | 877       |
| NM_153082  | chr12 | 4082611   | 4110602   | +      | Dnajc27     | 3668      |
| NM_009517  | chr3  | 32233715  | 32264587  | -      | Zmat3       | 6690      |
| NM_029885  | chr3  | 94985689  | 95021864  | -      | Gabpb2      | 6902      |
| NM_023305  | chr4  | 41296028  | 41336799  | +      | Ubap1       | 945       |
| NM_013785  | chr9  | 107904978 | 107951113 | +      | Ip6k1       | 2810      |

## Supplemental Data

646 genes >200 piRNAs in OSS

highly expressed = 700 genes (>8 expression level)

orange=GO terms shared in common between genes with high piRNAs and genes that are

green = GO terms specific to high piRNA set

highly expressed = 700 genes (>8 expression level)

orange are GO terms that are in common between 646 genes >200 piRNAs in OSS and highly ex

green are GO terms exclusive to the 646 genes >200 piRNAs in OSS

## Supplemental Data

orange=GO terms shared in common between genes with high piRNAs and genes that are  
green = GO terms specific to high piRNA set



Supplemental Data

| piRNA level | Gene          | GPL reference | Mili+/- mouse D10 testes |
|-------------|---------------|---------------|--------------------------|
| 1           | Abl2          |               |                          |
| 2           | Gabpb2        |               |                          |
| 3           | Cbx5          | 104259_at     | 73                       |
| 4           | Cbx5          | 95614_at      | 73.3                     |
| 5           | Tcfcp2l1      | 103761_at     | 42.2                     |
| 6           | Tcfcp2l1      | 97193_at      | 15                       |
| 7           | Elk4          | 98732_at      | 4.2                      |
| 8           | Fth1          | 94794_at      | 1197.6                   |
| 9           | Fam168b       |               |                          |
| 10          | Hic2          |               |                          |
| 11          | Cramp1l       | 103347_at     | 143.7                    |
| 12          | Rcan3         | 102374_at     | 109.7                    |
| 13          | Rmrp          |               |                          |
| 14          | Zyg11b        | 99779_at      | 17.5                     |
| 15          | Ctdsp2        | 95161_at      | 369.2                    |
| 16          | Il17rd        |               |                          |
| 17          | Ndst1         | 92516_at      | 1.9                      |
| 18          | Ndst1         | 93590_at      | 87.9                     |
| 19          | Tef           | 160117_at     | 173.4                    |
| 20          | Lpp           | 96736_at      | 163.9                    |
| 21          | Atxn1l        |               |                          |
| 22          | Tmem107       |               |                          |
| 23          | Hif1an        |               |                          |
| 24          | Rnu1b2        |               |                          |
| 25          | Ppm1f         |               |                          |
| 26          | Snord22       |               |                          |
| 27          | Socs7         |               |                          |
| 28          | Tmed8         |               |                          |
| 29          | Cbfa2t2       | 97406_at      | 125                      |
| 30          | Cbfa2t2       | 98371_at      | 3.7                      |
| 31          | Ing5          |               |                          |
| 32          | Smcr8         |               |                          |
| 33          | Luzp1         |               |                          |
| 34          | 6430706D22Rik | 160682_at     | 277.5                    |
| 35          | Fbxo41        |               |                          |
| 36          | Gas5          | 101885_at     | 6.6                      |
| 37          | Gas5          | 98530_at      | 35.7                     |
| 38          | Crkl          | 103848_at     | 128                      |
| 39          | Crkl          | 103849_at     | 11.4                     |
| 40          | Gna13         | 100514_at     | 120.1                    |
| 41          | Gna13         | 104316_at     | 53.5                     |
| 42          | Snx30         |               |                          |
| 43          | Rab11fip4     |               |                          |
| 44          | Zfp346        |               |                          |
| 45          | Wipf2         |               |                          |
| 46          | Ddx19b        | 92708_at      | 69.5                     |
| 47          | Scd2          | 95758_at      | 1335.5                   |
| 48          | D330038O06Rik |               |                          |
